# Supplementary material
Source: PubMed Central journal article supplement (PMC4125730)
Supplement: supp_M113.035949_mcp.M113.035949-4.pdf [file supp_M113.035949_mcp.M113.035949-4.pdf]

**Supplementary Table 4: Significantly regulated phosphorylation events in  $\Delta PrkC$  and  $\Delta PrpC$  strains.** Details of phosphorylation sites with significantly changing SILAC ratios in  $\Delta prkC$  and  $\Delta prpC$  strains compared to WT. T290 on PrkC is a known substrate of the phosphatase PrpC (internal positive control).

| No. | Gene Name   | Position | Localization Probability | PEP Score | SILAC ratio in $\Delta prkC$ ( $\text{Log}_2$ scale) | SILAC ratio in $\Delta prpC$ ( $\text{Log}_2$ scale) | Description                                         |
|-----|-------------|----------|--------------------------|-----------|------------------------------------------------------|------------------------------------------------------|-----------------------------------------------------|
| 1   | <i>citM</i> | S182     | 1                        | 1.63E-13  | -2.45182                                             | 0.439527                                             | 2-oxoglutarate dehydrogenase component E2           |
| 2   | <i>jofD</i> | S365     | 0.509                    | 1.24E-31  | -2.18683                                             | -1.13958                                             | 30S ribosomal protein S1 homolog                    |
| 3   | <i>yabS</i> | T88      | 1                        | 8.35E-192 | -1.54057                                             | 0.235825                                             | Uncharacterized protein                             |
| 4   | <i>ykwC</i> | S281     | 0.998                    | 7.69E-23  | -1.15752                                             | 2.917978                                             | Uncharacterized oxidoreductase                      |
| 5   | <i>thiA</i> | S565     | 1                        | 5.77E-81  | -1.09944                                             | -0.0718                                              | Thiamine biosynthesis protein                       |
| 6   | <i>yabS</i> | T90      | 1                        | 8.35E-192 | -1.04965                                             | -0.14854                                             | Uncharacterized protein yabS                        |
| 7   | <i>ahpF</i> | S49      | 0.958                    | 1.53E-33  | -1.03892                                             | -0.77889                                             | Alkyl hydroperoxide reductase - NADH dehydrogenase  |
| 8   | <i>cotB</i> | S253     | 0.883                    | 8.65E-07  | 1.973082                                             | 5.353034                                             | Spore coat protein B                                |
| 9   | <i>gapA</i> | S282     | 0.976                    | 2.45E-91  | 1.200391                                             | 1.711156                                             | Glyceraldehyde-3-phosphate dehydrogenase 1          |
| 10  | <i>ptkA</i> | Y228     | 0.773                    | 0.00011   | 1.125995                                             | 1.561541                                             | Tyrosine-protein kinase                             |
| 11  | <i>prkC</i> | T290     | 1                        | 1.31E-71  | -0.81333                                             | 3.544522                                             | Serine/threonine -protein kinase (Positive Control) |
| 12  | <i>patA</i> | T388     | 1                        | 5.03E-05  | 0.128373                                             | 3.188502                                             | Putative aminotransferase A                         |
| 13  | <i>ymfM</i> | S69      | 1                        | 6.18E-88  | -0.26271                                             | 2.575126                                             | Uncharacterized membrane protein                    |
| 14  | <i>rplN</i> | T6       | 1                        | 0.0006    | 0.193166                                             | 1.001053                                             | 50S ribosomal protein L14                           |
| 15  | <i>phoD</i> | S545     | 0.908                    | 0.001854  | 0.6382483                                            | -2.597943                                            | Alkaline phosphatase D                              |
| 16  | <i>glmM</i> | S98      | 0.5                      | 3.11E-17  | -0.6031706                                           | -2.45766                                             | Phosphoglucosamine mutase                           |
| 17  | <i>ptsH</i> | T20      | 0.972                    | 9.63E-07  | 0.07748499                                           | -2.009252                                            | Histidine-containing phosphocarrier protein HPr     |
