# Supplementary material
Source: PubMed Central journal article supplement (PMC4125730)
Supplement: supp_M113.035949_mcp.M113.035949-5.pdf [file supp_M113.035949_mcp.M113.035949-5.pdf]

Source: 20120314\_VR\_TripleSILAC\_pT1L1T2\_F03  
 Scannumber: 10495  
 Protein: BSU11850; yjcG  
 Peptide Score: 77.79  
 Method: ITMS; CID; 3

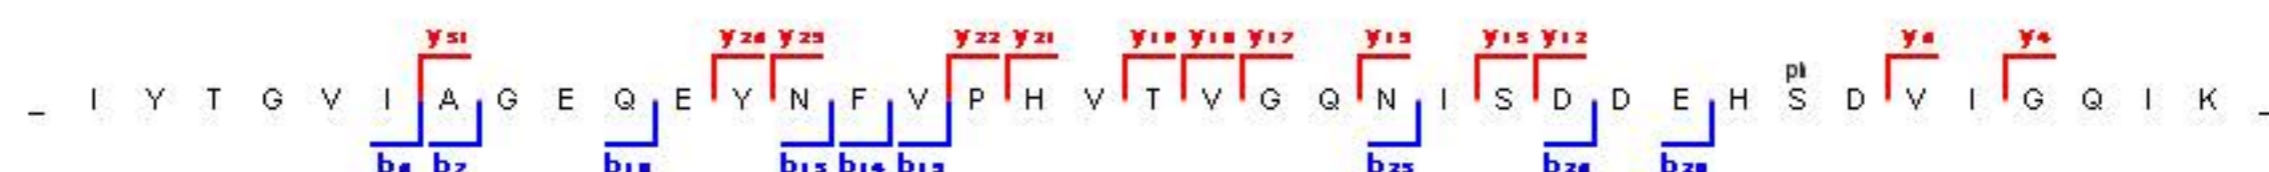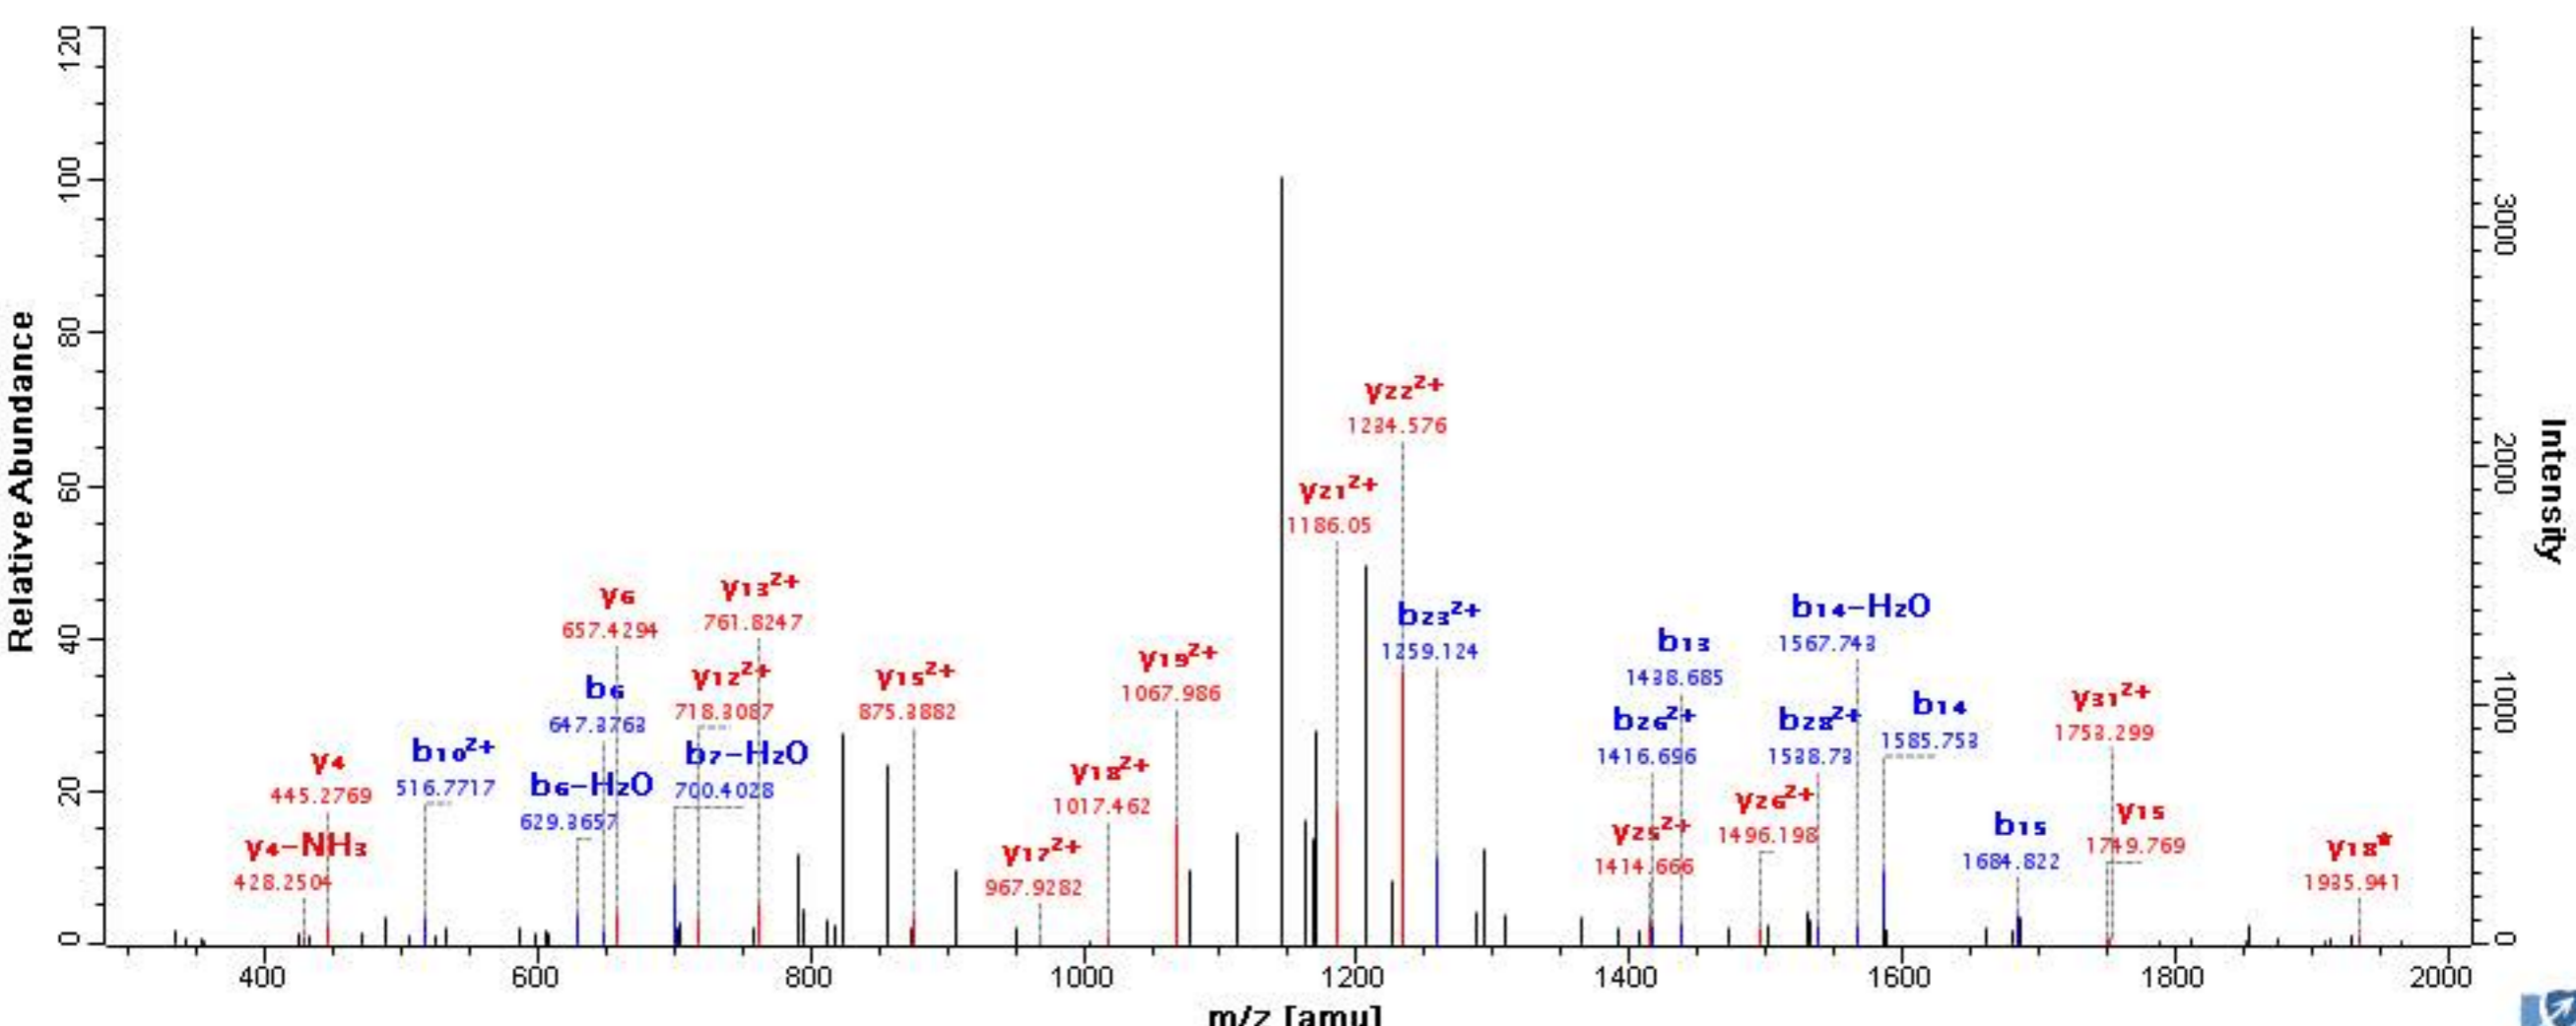

precursor information

|                   |                     |
|-------------------|---------------------|
| Mass:             | 4150.95459          |
| m/z:              | System.Collections. |
| Charge:           | System.Collections. |
| Retentiontime:    | System.Collections. |
| Score:            | 77.79086            |
| Mass Error [ppm]: | 0.50606             |
| PEP:              | 5.0126E-17          |
| Precursor Type:   | ISO                 |

| b <sup>2+</sup> ion |          | b ion     |          | seq |   | γ ion    |          | γ <sup>2+</sup> ion |           |           |
|---------------------|----------|-----------|----------|-----|---|----------|----------|---------------------|-----------|-----------|
| Δ dalton            | mass     | Δ dalton  | mass     |     |   | Δ dalton | mass     | Δ dalton            | mass      |           |
|                     | 114.0913 |           | 114.0913 | 1   | I | 36       |          |                     |           |           |
|                     | 277.1547 |           | 277.1547 | 2   | Y | 35       | 4038.876 | 4038.876            |           |           |
|                     | 378.2023 |           | 378.2023 | 3   | T | 34       | 3875.812 | 3875.812            |           |           |
|                     | 435.2238 |           | 435.2238 | 4   | G | 33       | 3774.765 | 3774.765            |           |           |
|                     | 534.2922 |           | 534.2922 | 5   | V | 32       | 3717.743 | 3717.743            |           |           |
|                     | 647.3763 | +0.004753 | 647.3763 | 6   | I | 31       | 3618.675 | 3618.675            |           |           |
|                     | 718.4134 |           | 718.4134 | 7   | A | 30       | 3505.591 | 1753.299            | -0.210267 |           |
|                     | 775.4349 |           | 775.4349 | 8   | G | 29       | 3434.554 | 3434.554            |           |           |
|                     | 904.4775 |           | 904.4775 | 9   | E | 28       | 3377.532 | 3377.532            |           |           |
| -0.398732           | 516.7717 |           | 1032.536 | 10  | Q | 27       | 3248.49  | 3248.49             |           |           |
|                     | 1161.579 |           | 1161.579 | 11  | E | 26       | 3120.431 | 3120.431            |           |           |
|                     | 1324.642 |           | 1324.642 | 12  | Y | 25       | 2991.388 | 1496.198            | +0.157383 |           |
|                     | 1438.685 | +0.138234 | 1438.685 | 13  | N | 24       | 2828.325 | 1414.666            | +0.402182 |           |
|                     | 1585.753 | -0.142338 | 1585.753 | 14  | F | 23       | 2714.282 | 2714.282            |           |           |
|                     | 1684.822 | -0.002622 | 1684.822 | 15  | V | 22       | 2567.214 | 2567.214            |           |           |
|                     | 1781.874 |           | 1781.874 | 16  | P | 21       | 2468.145 | 1234.576            | +0.118646 |           |
|                     | 1918.933 |           | 1918.933 | 17  | H | 20       | 2371.093 | 1186.05             | -0.244498 |           |
|                     | 2018.002 |           | 2018.002 | 18  | V | 19       | 2234.034 | 2234.034            |           |           |
|                     | 2119.049 |           | 2119.049 | 19  | T | 18       | 2134.965 | 1067.986            | +0.242993 |           |
|                     | 2218.118 |           | 2218.118 | 20  | V | 17       | 2033.918 | 1017.462            | +0.475695 |           |
|                     | 2275.139 |           | 2275.139 | 21  | G | 16       | 1934.849 | 967.9282            | -0.01317  |           |
|                     | 2403.198 |           | 2403.198 | 22  | Q | 15       | 1877.828 | 1877.828            |           |           |
| -0.018846           | 1259.124 |           | 2517.241 | 23  | N | 14       | 1749.769 | +0.410221           | 875.3882  | +0.110469 |
|                     | 2630.325 |           | 2630.325 | 24  | I | 13       | 1635.726 | 1635.726            |           |           |
|                     | 2717.357 |           | 2717.357 | 25  | S | 12       | 1522.642 | 761.8247            | +0.181289 |           |
| +0.273528           | 1416.696 |           | 2832.384 | 26  | D | 11       | 1435.61  | 718.3087            | -0.028588 |           |
|                     | 2947.411 |           | 2947.411 | 27  | D | 10       | 1320.583 | 1320.583            |           |           |
| +0.10436            | 1538.73  |           | 3076.453 | 28  | E | 9        | 1205.556 | 1205.556            |           |           |
|                     | 3213.512 |           | 3213.512 | 29  | H | 8        | 1076.514 | 1076.514            |           |           |
|                     | 3380.511 |           | 3380.511 | 30  | S | 7        | 939.4547 | 939.4547            |           |           |
|                     | 3495.538 |           | 3495.538 | 31  | D | 6        | 772.4563 | 772.4563            |           |           |
|                     | 3594.606 |           | 3594.606 | 32  | V | 5        | 657.4294 | +0.015498           | 657.4294  |           |
|                     | 3707.69  |           | 3707.69  | 33  | I | 4        | 558.361  | 558.361             |           |           |
|                     | 3764.712 |           | 3764.712 | 34  | G | 3        | 445.2769 | +0.11573            | 445.2769  |           |
|                     | 3892.77  |           | 3892.77  | 35  | Q | 2        | 388.2554 | 388.2554            |           |           |
|                     | 4005.854 |           | 4005.854 | 36  | I | 1        | 260.1969 | 260.1969            |           |           |
|                     |          |           |          | 37  | K | 0        | 147.1128 | 147.1128            |           |           |

general information

|                       |            |
|-----------------------|------------|
| Annotation:           | 19 of 37   |
| AminoAcids Coverage:  | 51 %       |
| Intensity Coverage:   | 26 %       |
| Protein Localisation: | 99 ... 135 |

Source: 20120314\_VR\_TripleSILAC\_pT1L1T2\_F03  
 Scannumber: 3255  
 Protein: BSU01260; rpIN  
 Peptide Score: 135.43  
 Method: ITMS; CID; 3

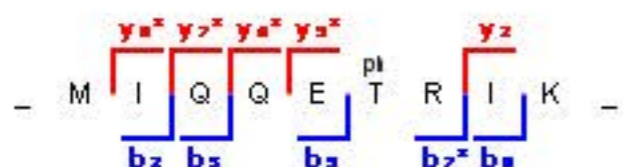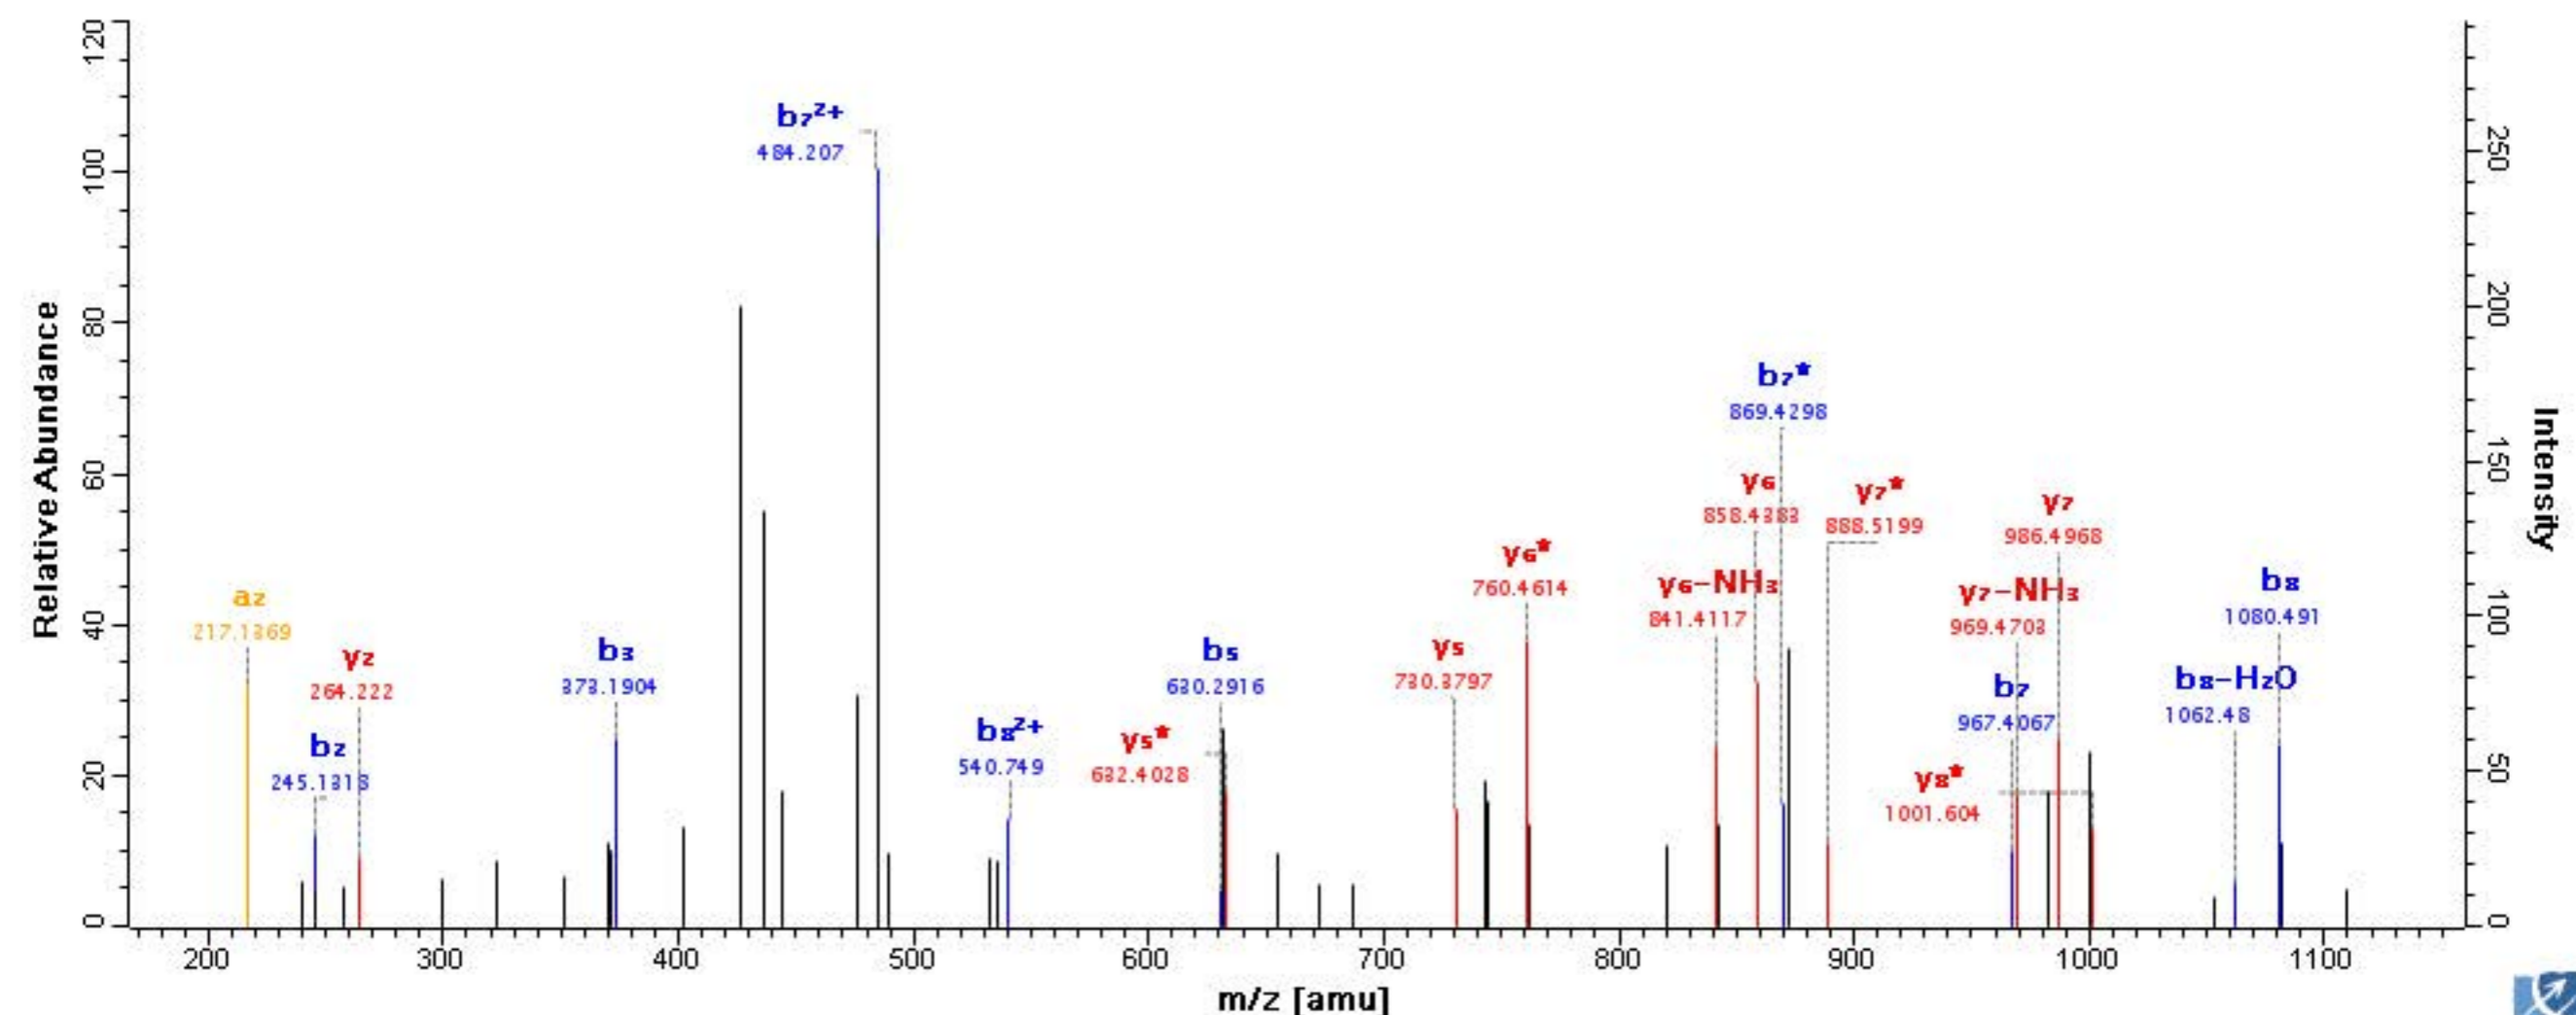

### precursor information

|                       |                     |
|-----------------------|---------------------|
| Mass:                 | 1229.61414          |
| m/z:                  | System.Collections. |
| Charge:               | System.Collections. |
| Retentiontime:        | System.Collections. |
| Score:                | 135.4286            |
| Mass Error [ppm]:     | 0.020967            |
| PEP:                  | 6.3064E-09          |
| g Precursor Type:     | ISO                 |
| Annotation:           | 6 of 9              |
| AminoAcids Coverag    | 67 %                |
| Intensity Coverage:   | 42 %                |
| Protein Localisation: | 1 ... 9             |

| a ion    |          | b <sup>2+</sup> ion |          | b ion     |          |   |     | y ion    |                    |
|----------|----------|---------------------|----------|-----------|----------|---|-----|----------|--------------------|
| Δ dalton | mass     | Δ dalton            | mass     | Δ dalton  | mass     |   | seq | Δ dalton | mass               |
|          | 104.0528 |                     | 132.0478 |           | 132.0478 | 1 | M   | 8        |                    |
| +0.03472 | 217.1369 |                     | 245.1318 | +0.006084 | 245.1318 | 2 | I   | 7        | 1099.581           |
|          | 345.1955 |                     | 373.1904 | -0.0629   | 373.1904 | 3 | Q   | 6        | 986.4968 +0.017317 |
|          | 473.2541 |                     | 501.249  |           | 501.249  | 4 | Q   | 5        | 858.4383 +0.044706 |
|          | 602.2967 |                     | 630.2916 | +0.027702 | 630.2916 | 5 | E   | 4        | 730.3797 +0.228527 |
|          | 783.3107 |                     | 811.3056 |           | 811.3056 | 6 | T   | 3        | 601.3371           |
|          | 939.4118 | +0.401047           | 484.207  | +0.140365 | 967.4067 | 7 | R   | 2        | 420.3231           |
|          | 1052.496 | -0.083673           | 540.749  | +0.053188 | 1080.491 | 8 | I   | 1        | 264.222 +0.063303  |
|          |          |                     |          |           |          | 9 | K   | 0        | 151.1379           |

Source: 20120314\_VR\_TripleSILAC\_pT1L1T2\_F03  
 Scannumber: 3765  
 Protein: BSU35730; gtaA; rodD; tagE  
 Peptide Score: 129.82  
 Method: ITMS; CID; 3

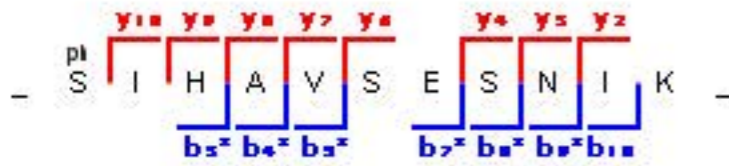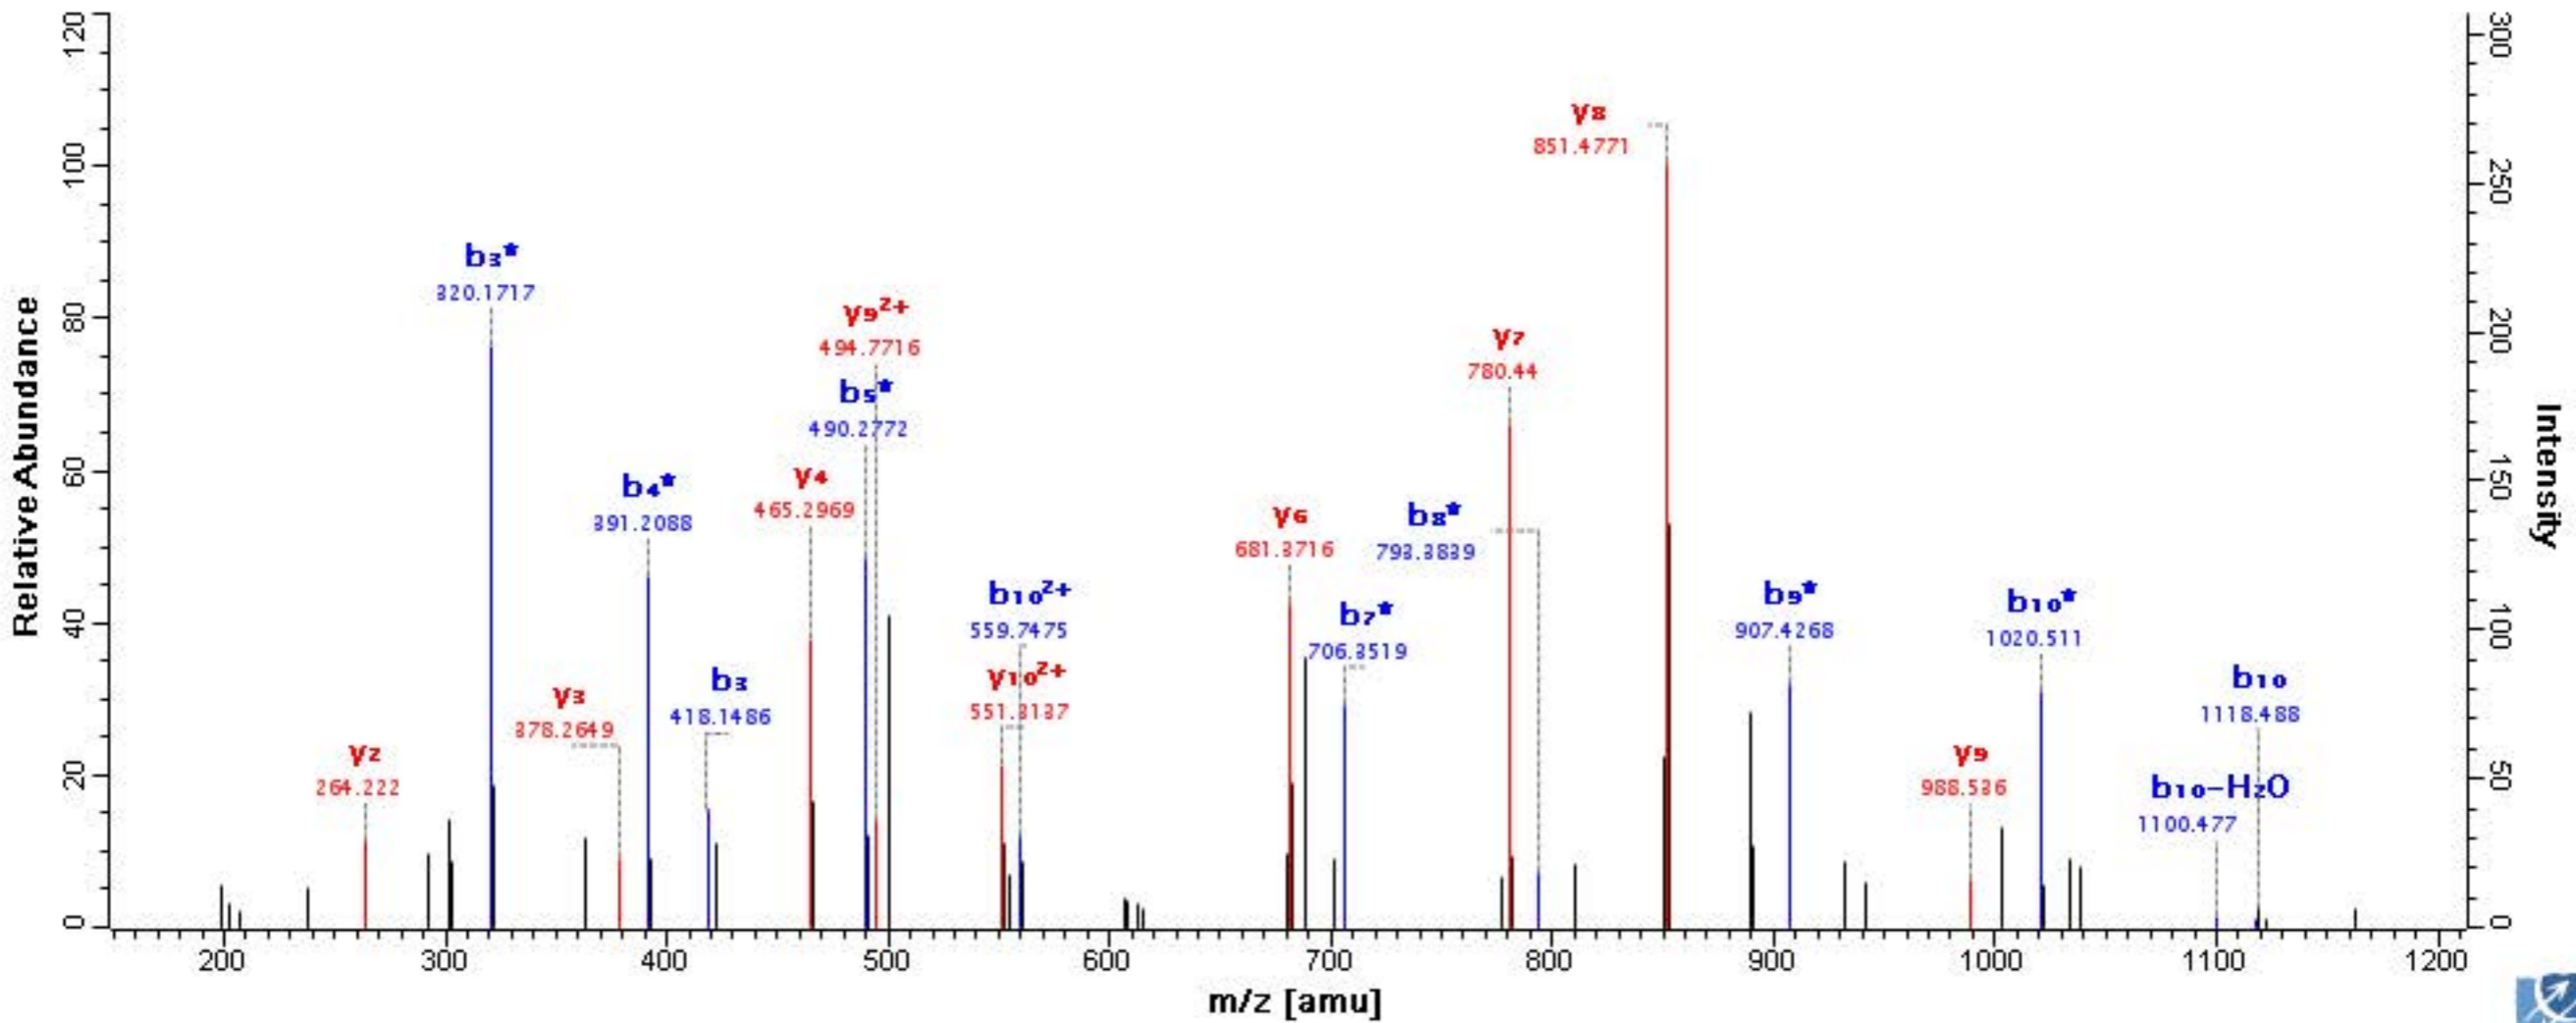

#### precursor information

|                   |                     |
|-------------------|---------------------|
| Mass:             | 1263.5865           |
| m/z:              | System.Collections. |
| Charge:           | System.Collections. |
| Retentiontime:    | System.Collections. |
| Score:            | 129.8187            |
| Mass Error [ppm]: | 0.36833             |
| PEP:              | 3.8995E-08          |
| Precursor Type:   | MULTI               |

#### general information

|                       |          |
|-----------------------|----------|
| Annotation:           | 9 of 11  |
| AminoAcids Coverag    | 82 %     |
| Intensity Coverage:   | 56 %     |
| Protein Localisation: | 2 ... 12 |

| b <sup>2+</sup> ion |          | b ion     |          |     | y ion |          | y <sup>2+</sup> ion |           |          |           |
|---------------------|----------|-----------|----------|-----|-------|----------|---------------------|-----------|----------|-----------|
| Δ dalton            | mass     | Δ dalton  | mass     | seq |       | Δ dalton | mass                | Δ dalton  | mass     |           |
|                     | 168.0056 |           | 168.0056 | 1   | S     | 10       |                     |           |          |           |
|                     | 281.0897 |           | 281.0897 | 2   | I     | 9        | 1101.62             |           | 551.3137 | -0.280524 |
|                     | 418.1486 | +0.0879   | 418.1486 | 3   | H     | 8        | 988.536             | +0.197895 | 494.7716 | +0.068698 |
|                     | 489.1857 |           | 489.1857 | 4   | A     | 7        | 851.4771            | +0.053254 | 851.4771 |           |
|                     | 588.2541 |           | 588.2541 | 5   | V     | 6        | 780.44              | +0.032751 | 780.44   |           |
|                     | 675.2862 |           | 675.2862 | 6   | S     | 5        | 681.3716            | +0.153655 | 681.3716 |           |
|                     | 804.3288 |           | 804.3288 | 7   | E     | 4        | 594.3395            |           | 594.3395 |           |
|                     | 891.3608 |           | 891.3608 | 8   | S     | 3        | 465.2969            | +0.192693 | 465.2969 |           |
|                     | 1005.404 |           | 1005.404 | 9   | N     | 2        | 378.2649            | -0.061289 | 378.2649 |           |
| -0.34256            | 559.7475 | -0.160266 | 1118.488 | 10  | I     | 1        | 264.222             | +0.064615 | 264.222  |           |
|                     |          |           |          | 11  | K     | 0        | 151.1379            |           | 151.1379 |           |

Source: 20120314\_VR\_TripleSILAC\_pT1L1T2\_F03  
 Scannumber: 5982  
 Protein: BSU16940; recA; recE  
 Peptide Score: 114.82  
 Method: ITMS; CID; 3

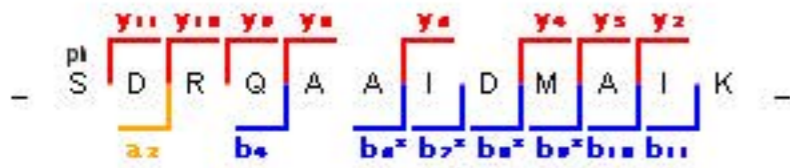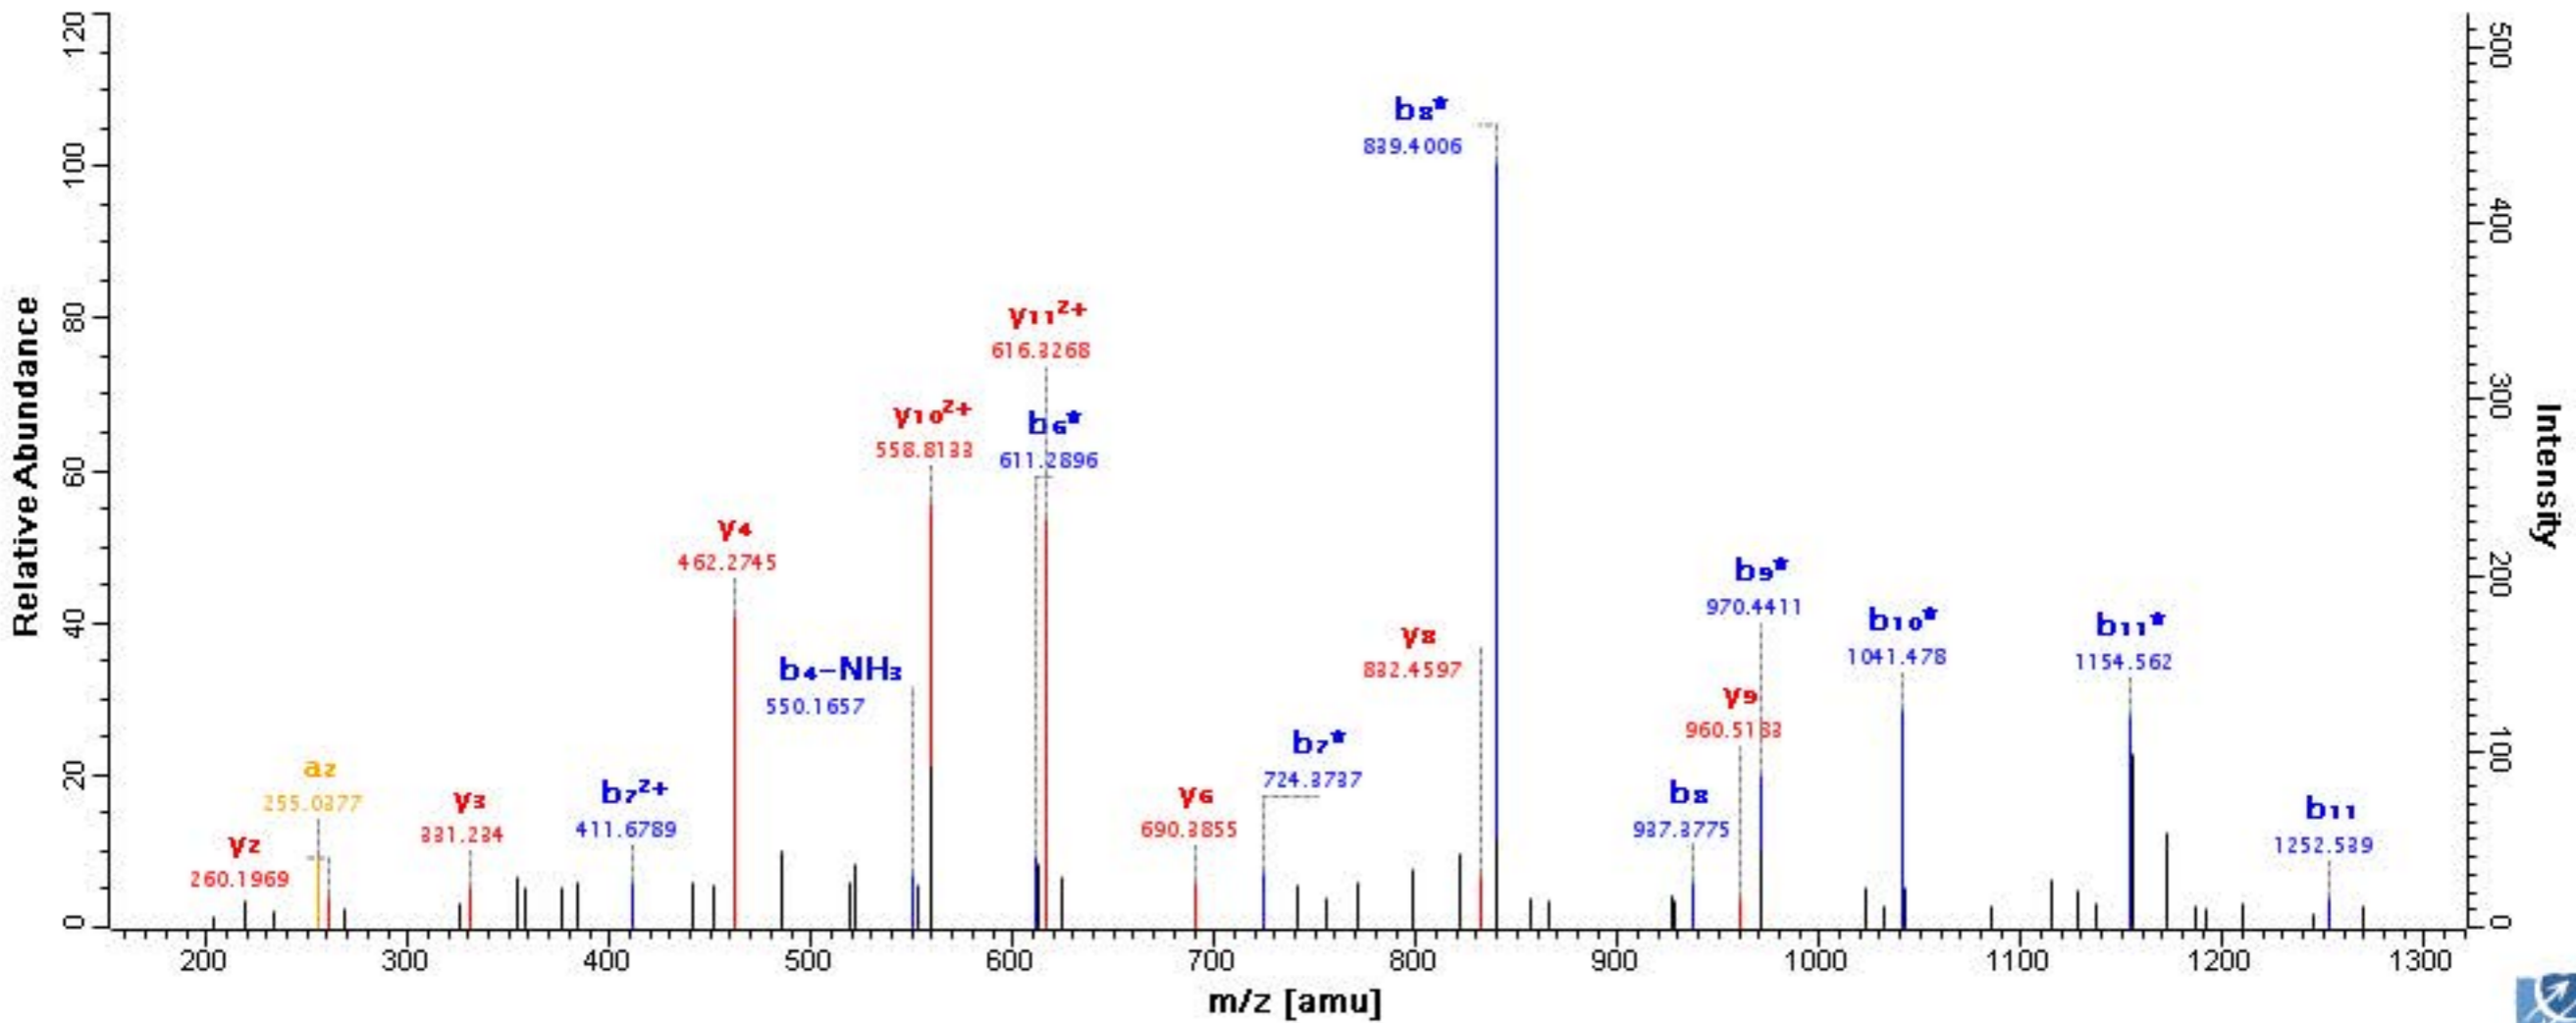

**precursor information**

|                   |                     |
|-------------------|---------------------|
| Mass:             | 1397.63817          |
| m/z:              | System.Collections. |
| Charge:           | System.Collections. |
| Retentiontime:    | System.Collections. |
| Score:            | 114.8167            |
| Mass Error [ppm]: | 0.54315             |
| PEP:              | 2.2616E-05          |
| Precursor Type:   | MULTI               |

**general information**

|                       |          |
|-----------------------|----------|
| Annotation:           | 10 of 12 |
| AminoAcids Coverage:  | 83 %     |
| Intensity Coverage:   | 60 %     |
| Protein Localisation: | 2 ... 13 |

| a ion    |         | b <sup>2+</sup> ion |         | b ion    |         |    |     |    | y ion    |          | y <sup>2+</sup> ion |          |
|----------|---------|---------------------|---------|----------|---------|----|-----|----|----------|----------|---------------------|----------|
| Δ dalton | mass    | Δ dalton            | mass    | Δ dalton | mass    |    | seq |    | Δ dalton | mass     | Δ dalton            | mass     |
|          | 140.011 |                     | 168.006 |          | 168.006 | 1  | S   | 11 |          |          |                     |          |
| +0.05146 | 255.038 |                     | 283.033 |          | 283.033 | 2  | D   | 10 | 1231.65  |          | 616.327             | +0.22788 |
|          | 411.139 |                     | 439.134 |          | 439.134 | 3  | R   | 9  | 1116.62  |          | 558.813             | +0.02523 |
|          | 539.197 |                     | 567.192 |          | 567.192 | 4  | Q   | 8  | 960.518  | +0.09348 | 960.518             |          |
|          | 610.234 |                     | 638.229 |          | 638.229 | 5  | A   | 7  | 832.46   | -0.1539  | 832.46              |          |
|          | 681.272 |                     | 709.266 |          | 709.266 | 6  | A   | 6  | 761.423  |          | 761.423             |          |
|          | 794.356 | -0.1368             | 411.679 |          | 822.351 | 7  | I   | 5  | 690.385  | +0.14913 | 690.385             |          |
|          | 909.383 |                     | 937.378 | +0.1159  | 937.378 | 8  | D   | 4  | 577.301  |          | 577.301             |          |
|          | 1040.42 |                     | 1068.42 |          | 1068.42 | 9  | M   | 3  | 462.274  | +0.01966 | 462.274             |          |
|          | 1111.46 |                     | 1139.46 |          | 1139.46 | 10 | A   | 2  | 331.234  | +0.06649 | 331.234             |          |
|          | 1224.54 |                     | 1252.54 | +0.1255  | 1252.54 | 11 | I   | 1  | 260.197  | +0.09439 | 260.197             |          |
|          |         |                     |         |          |         | 12 | K   | 0  | 147.113  |          | 147.113             |          |

Source: 20120314\_VR\_TripleSILAC\_pT1L1T2\_F03  
 Scannumber: 7518  
 Protein: BSU11690; thiG; yjbT  
 Peptide Score: 107.99  
 Method: ITMS; CID; 3

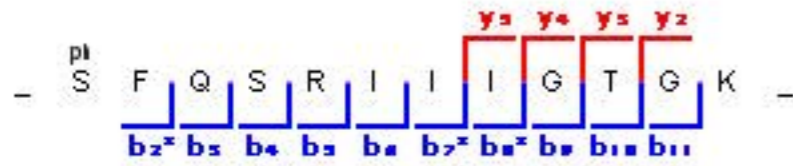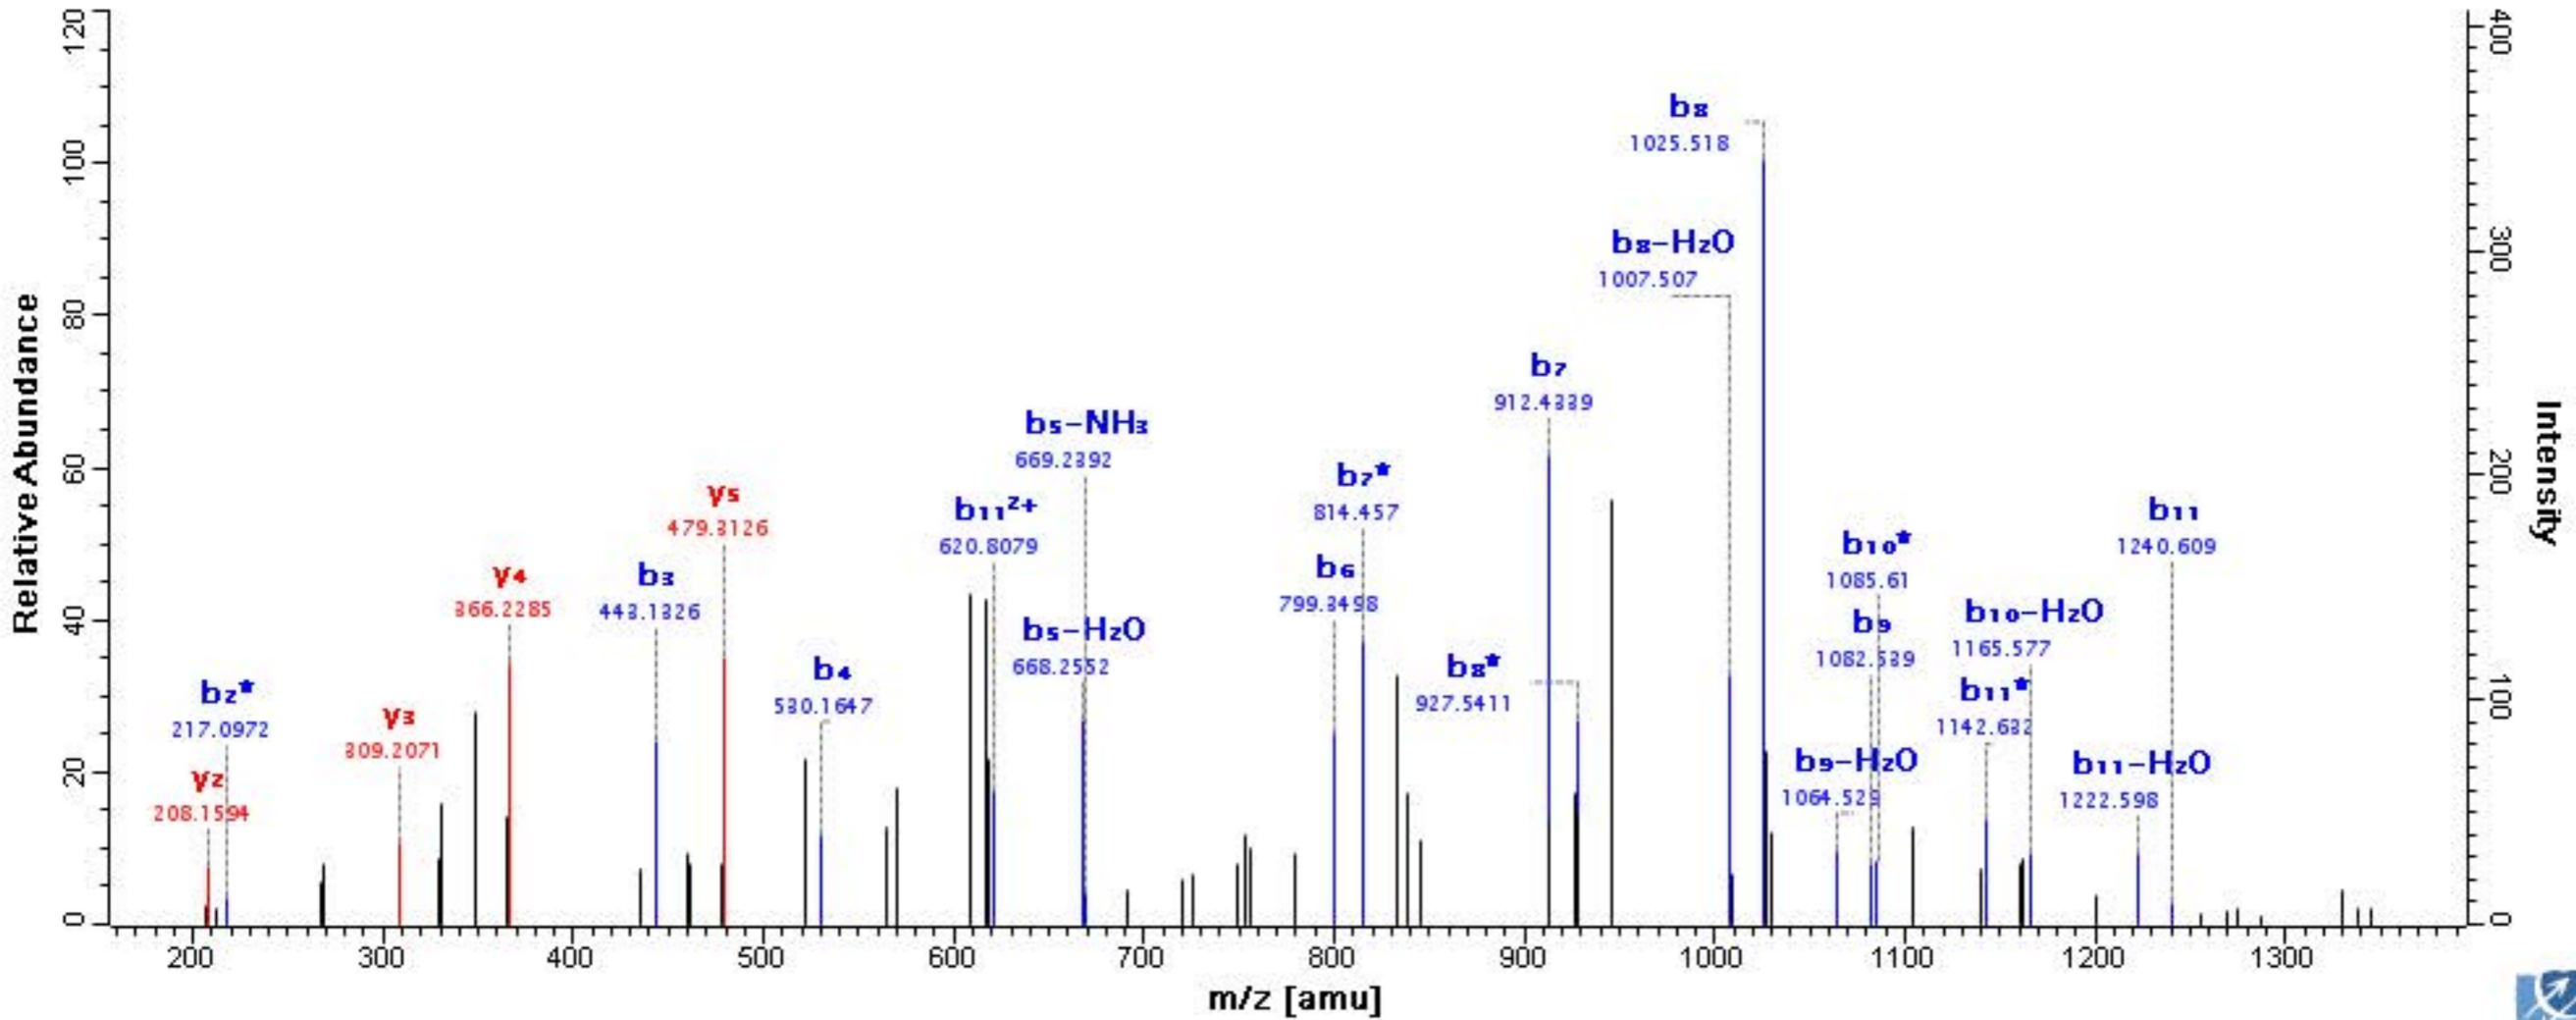

#### precursor information

|                   |                     |
|-------------------|---------------------|
| Mass:             | 1385.70607          |
| m/z:              | System.Collections. |
| Charge:           | System.Collections. |
| Retentiontime:    | System.Collections. |
| Score:            | 107.9941            |
| Mass Error [ppm]: | -0.5347             |
| PEP:              | 0.0001056           |
| Precursor Type:   | MULTI               |

#### general information

|                       |           |
|-----------------------|-----------|
| Annotation:           | 10 of 12  |
| AminoAcids Coverag    | 83 %      |
| Intensity Coverage:   | 45 %      |
| Protein Localisation: | 10 ... 21 |

| b <sup>2+</sup> ion |              | b ion      |              |     | y ion |          |                         |
|---------------------|--------------|------------|--------------|-----|-------|----------|-------------------------|
| Δ dalton            | mass         | Δ dalton   | mass         | seq |       | Δ dalton | mass                    |
|                     | 168.00563528 |            | 168.00563528 | 1   | S     | 11       |                         |
|                     | 315.0740492  |            | 315.0740492  | 2   | F     | 10       | 1223.7408399            |
|                     | 443.13262671 | +0.0410793 | 443.13262671 | 3   | Q     | 9        | 1076.672426             |
|                     | 530.16465512 | -0.350141  | 530.16465512 | 4   | S     | 8        | 948.61384845            |
|                     | 686.26576615 |            | 686.26576615 | 5   | R     | 7        | 861.58182004            |
|                     | 799.34983013 | +0.0545278 | 799.34983013 | 6   | I     | 6        | 705.48070902            |
|                     | 912.43389411 | -0.1201124 | 912.43389411 | 7   | I     | 5        | 592.39664504            |
|                     | 1025.5179581 | -0.0106339 | 1025.5179581 | 8   | I     | 4        | 479.31258106 +0.0099287 |
|                     | 1082.5394218 | -0.1885917 | 1082.5394218 | 9   | G     | 3        | 366.22851708 +0.018187  |
|                     | 1183.5871003 |            | 1183.5871003 | 10  | T     | 2        | 309.20705335 -0.2433082 |
| -0.1990335          | 620.80792024 | -0.1177193 | 1240.608564  | 11  | G     | 1        | 208.15937488 +0.0843538 |
|                     |              |            |              | 12  | K     | 0        | 151.13791115            |

Source: 20120314\_VR\_TripleSILAC\_pT1 L1 T2\_F03  
 Scannumber: 7867  
 Protein: BSU40910; rpsF  
 Peptide Score: 171.78  
 Method: ITMS; CID; 3

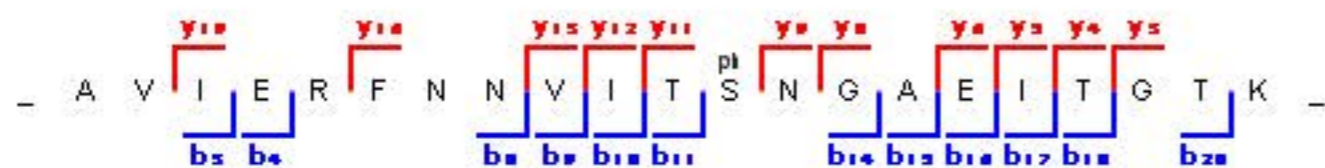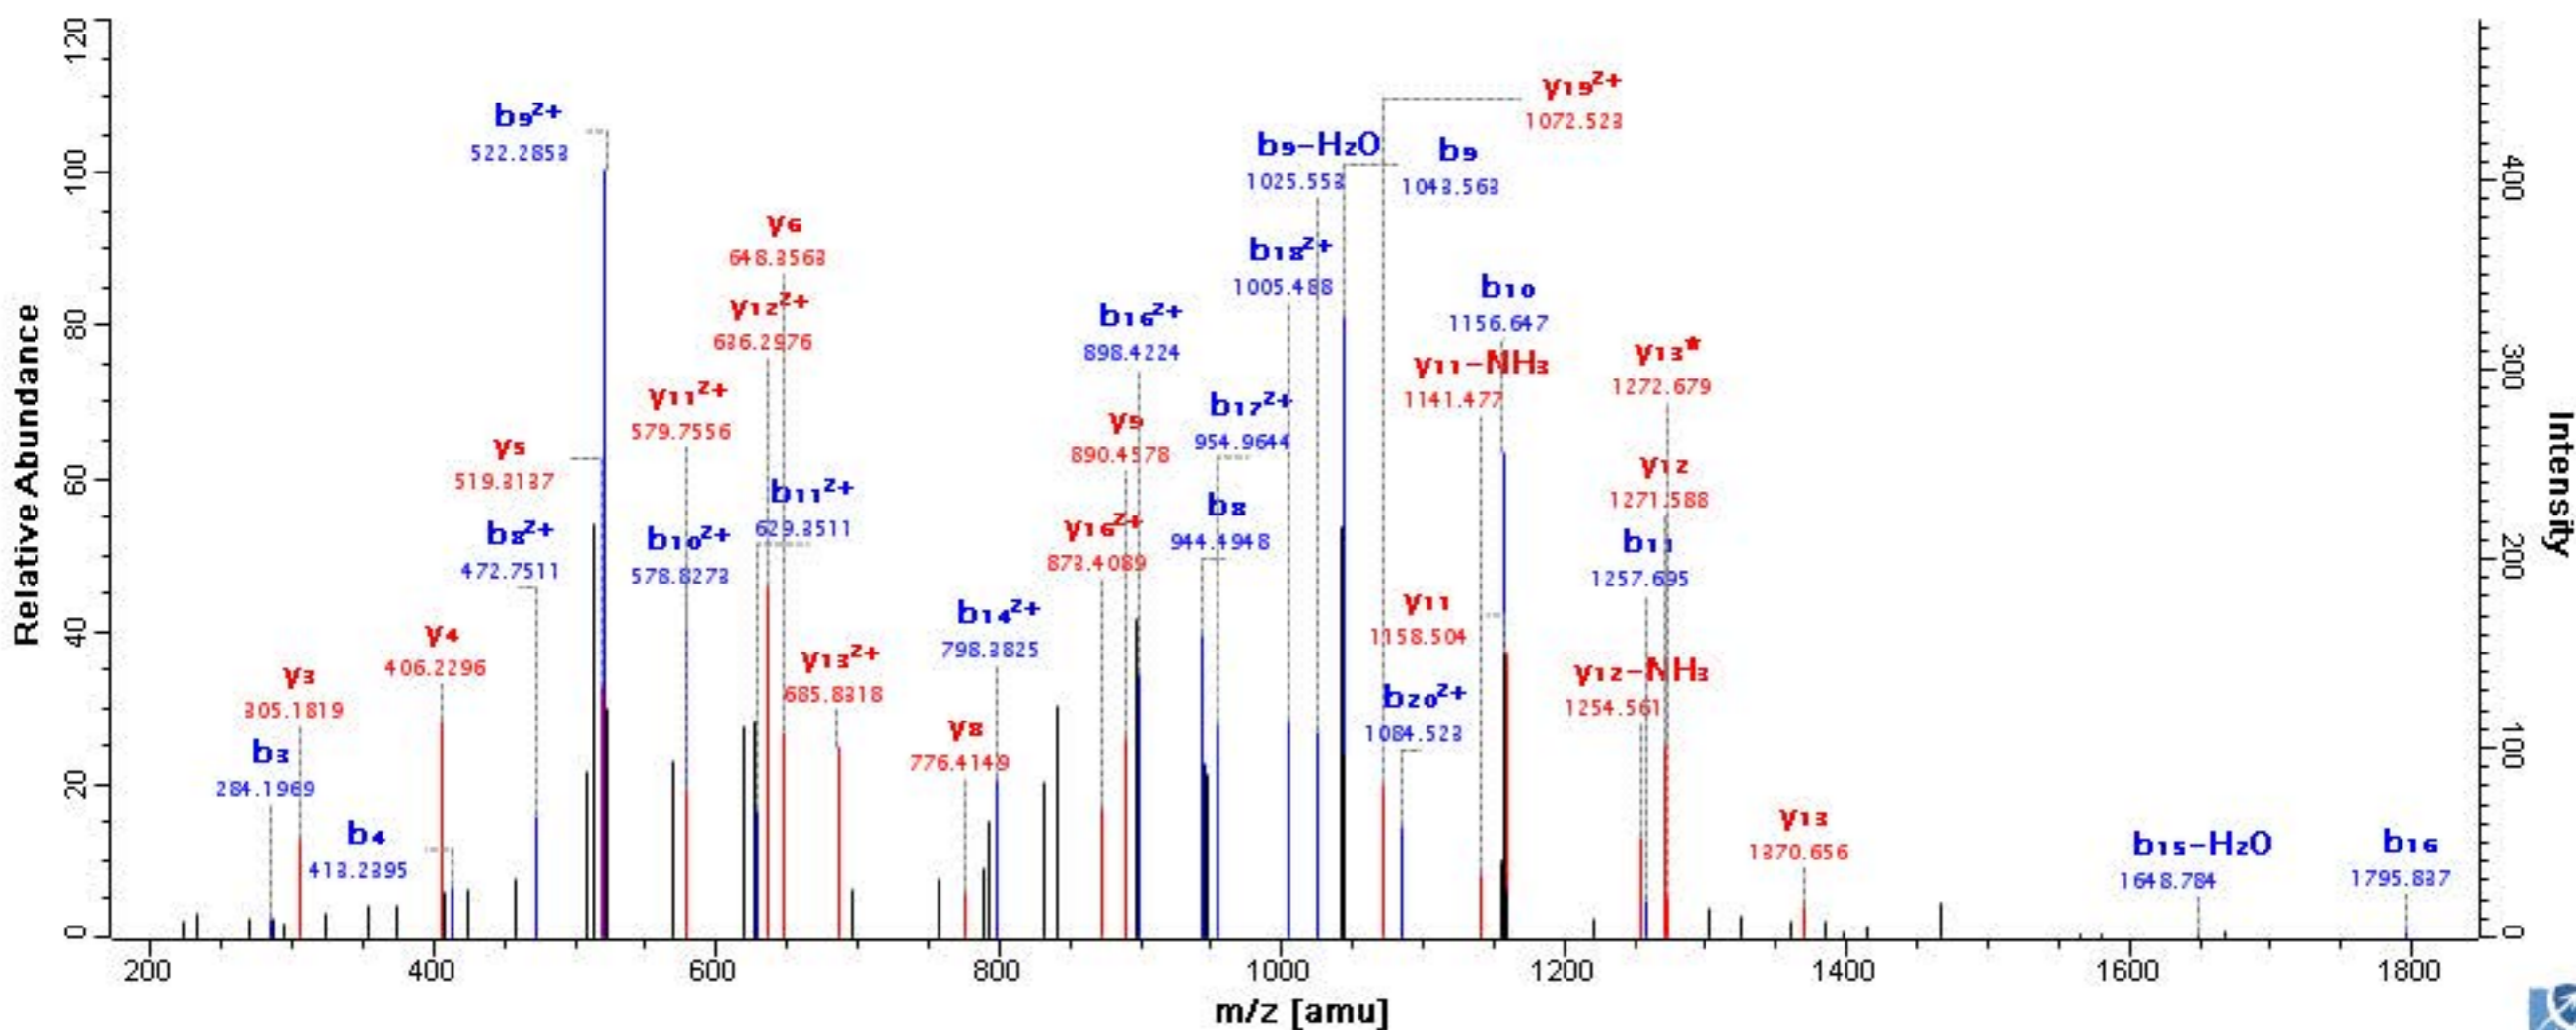

#### precursor information

|                   |                     |
|-------------------|---------------------|
| Mass:             | 2313.13811          |
| m/z:              | System.Collections. |
| Charge:           | System.Collections. |
| Retentiontime:    | System.Collections. |
| Score:            | 171.7834            |
| Mass Error [ppm]: | 0.65874             |
| PEP:              | 8.6057E-46          |
| Precursor Type:   | ISO                 |

| b <sup>2+</sup> ion |          | b ion     |          |    |     |    | y ion    |           | y <sup>2+</sup> ion |           |
|---------------------|----------|-----------|----------|----|-----|----|----------|-----------|---------------------|-----------|
| Δ dalton            | mass     | Δ dalton  | mass     |    | seq |    | Δ dalton | mass      | Δ dalton            | mass      |
|                     | 72.04439 |           | 72.04439 | 1  | A   | 20 |          |           |                     |           |
|                     | 171.1128 |           | 171.1128 | 2  | V   | 19 | 2243.107 |           | 2243.107            |           |
|                     | 284.1969 | +0.128266 | 284.1969 | 3  | I   | 18 | 2144.038 |           | 1072.523            | +0.242573 |
|                     | 413.2395 | -0.066976 | 413.2395 | 4  | E   | 17 | 2030.954 |           | 2030.954            |           |
|                     | 569.3406 |           | 569.3406 | 5  | R   | 16 | 1901.912 |           | 1901.912            |           |
|                     | 716.409  |           | 716.409  | 6  | F   | 15 | 1745.811 |           | 873.4089            | +0.117138 |
|                     | 830.4519 |           | 830.4519 | 7  | N   | 14 | 1598.742 |           | 1598.742            |           |
| +0.07432            | 472.7511 | -0.012236 | 944.4948 | 8  | N   | 13 | 1484.699 |           | 1484.699            |           |
| -0.363452           | 522.2853 | +0.022682 | 1043.563 | 9  | V   | 12 | 1370.656 | -0.176077 | 685.8318            | +0.155149 |
| -0.107998           | 578.8273 | +0.0873   | 1156.647 | 10 | I   | 11 | 1271.588 | -0.06384  | 636.2976            | +0.109949 |
| -0.07245            | 629.3511 | -0.064748 | 1257.695 | 11 | T   | 10 | 1158.504 | +0.075522 | 579.7556            | -0.270382 |
|                     | 1424.693 |           | 1424.693 | 12 | S   | 9  | 1057.456 |           | 1057.456            |           |
|                     | 1538.736 |           | 1538.736 | 13 | N   | 8  | 890.4578 | -0.150353 | 890.4578            |           |
| +0.351314           | 798.3825 |           | 1595.758 | 14 | G   | 7  | 776.4149 | -0.27222  | 776.4149            |           |
|                     | 1666.795 |           | 1666.795 | 15 | A   | 6  | 719.3934 |           | 719.3934            |           |
| +0.226133           | 898.4224 | +0.376657 | 1795.837 | 16 | E   | 5  | 648.3563 | +0.038371 | 648.3563            |           |
| +0.13332            | 954.9644 |           | 1908.922 | 17 | I   | 4  | 519.3137 | +0.022859 | 519.3137            |           |
| +0.190169           | 1005.488 |           | 2009.969 | 18 | T   | 3  | 406.2296 | -0.021007 | 406.2296            |           |
|                     | 2066.991 |           | 2066.991 | 19 | G   | 2  | 305.1819 | +0.075836 | 305.1819            |           |
| +0.114155           | 1084.523 |           | 2168.038 | 20 | T   | 1  | 248.1605 |           | 248.1605            |           |
|                     |          |           |          | 21 | K   | 0  | 147.1128 |           | 147.1128            |           |

#### general information

|                       |           |
|-----------------------|-----------|
| Annotation:           | 15 of 21  |
| AminoAcids Coverag    | 71 %      |
| Intensity Coverage:   | 61 %      |
| Protein Localisation: | 21 ... 41 |

Source: 20120314\_VR\_TripleSILAC\_pT1 L1 T2\_F03  
 Scannumber: 8656  
 Protein: BSU28280; leuA  
 Peptide Score: 70.41  
 Method: ITMS; CID; 3

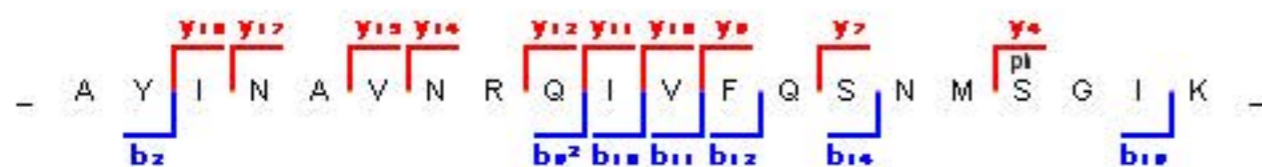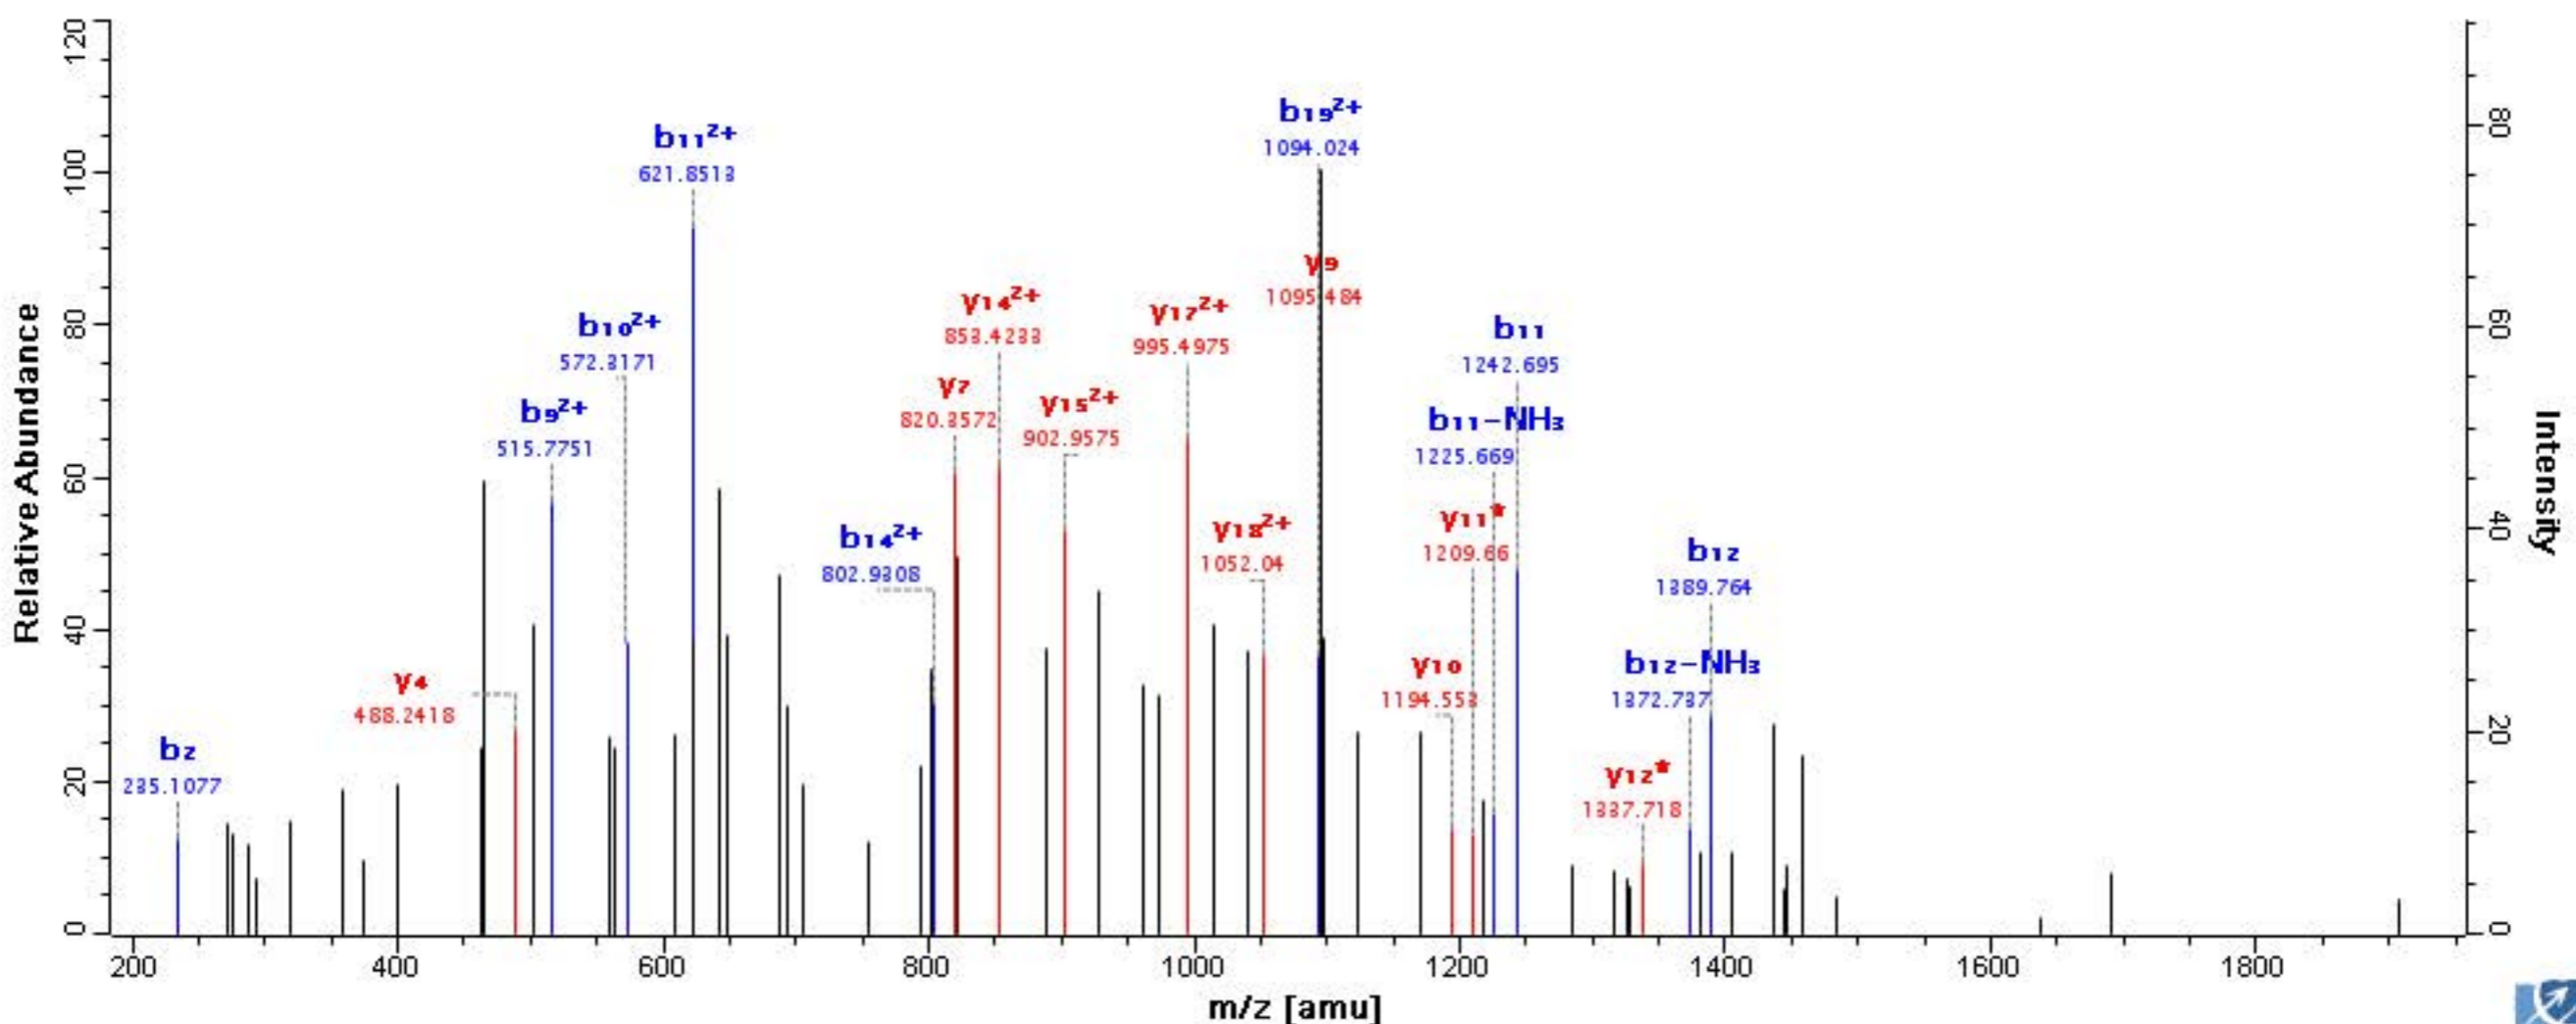

#### precursor information

|                   |                     |
|-------------------|---------------------|
| Mass:             | 2332.14105          |
| m/z:              | System.Collections. |
| Charge:           | System.Collections. |
| Retentiontime:    | System.Collections. |
| Score:            | 70.41049            |
| Mass Error [ppm]: | 0.48951             |
| PEP:              | 0.00014313          |
| Precursor Type:   | MULTI               |

| b <sup>2+</sup> ion |          | b ion     |          | seq |   |    | y ion    |           | y <sup>2+</sup> ion |           |
|---------------------|----------|-----------|----------|-----|---|----|----------|-----------|---------------------|-----------|
| Δ dalton            | mass     | Δ dalton  | mass     |     |   |    | Δ dalton | mass      | Δ dalton            | mass      |
|                     | 72.04439 |           | 72.04439 | 1   | A | 19 |          |           |                     |           |
|                     | 235.1077 | +0.011086 | 235.1077 | 2   | Y | 18 | 2266.135 |           | 2266.135            |           |
|                     | 348.1918 |           | 348.1918 | 3   | I | 17 | 2103.072 |           | 1052.04             | +0.141959 |
|                     | 462.2347 |           | 462.2347 | 4   | N | 16 | 1989.988 |           | 995.4975            | +0.014863 |
|                     | 533.2718 |           | 533.2718 | 5   | A | 15 | 1875.945 |           | 1875.945            |           |
|                     | 632.3402 |           | 632.3402 | 6   | V | 14 | 1804.908 |           | 902.9575            | -0.029284 |
|                     | 746.3832 |           | 746.3832 | 7   | N | 13 | 1705.839 |           | 853.4233            | +0.011698 |
|                     | 902.4843 |           | 902.4843 | 8   | R | 12 | 1591.796 |           | 1591.796            |           |
| +0.326497           | 515.7751 |           | 1030.543 | 9   | Q | 11 | 1435.695 |           | 1435.695            |           |
| +0.248394           | 572.3171 |           | 1143.627 | 10  | I | 10 | 1307.637 |           | 1307.637            |           |
| +0.136123           | 621.8513 | +0.099956 | 1242.695 | 11  | V | 9  | 1194.553 | +0.332855 | 1194.553            |           |
|                     | 1389.764 | +0.009936 | 1389.764 | 12  | F | 8  | 1095.484 | -0.359718 | 1095.484            |           |
|                     | 1517.822 |           | 1517.822 | 13  | Q | 7  | 948.4158 |           | 948.4158            |           |
| +0.100802           | 802.9308 |           | 1604.854 | 14  | S | 6  | 820.3572 | +0.036256 | 820.3572            |           |
|                     | 1718.897 |           | 1718.897 | 15  | N | 5  | 733.3252 |           | 733.3252            |           |
|                     | 1849.938 |           | 1849.938 | 16  | M | 4  | 619.2823 |           | 619.2823            |           |
|                     | 2016.936 |           | 2016.936 | 17  | S | 3  | 488.2418 | -0.431129 | 488.2418            |           |
|                     | 2073.958 |           | 2073.958 | 18  | G | 2  | 321.2434 |           | 321.2434            |           |
| -0.067798           | 1094.024 |           | 2187.042 | 19  | I | 1  | 264.222  |           | 264.222             |           |
|                     |          |           |          | 20  | K | 0  | 151.1379 |           | 151.1379            |           |

#### general information

|                       |             |
|-----------------------|-------------|
| Annotation:           | 14 of 20    |
| AminoAcids Coverag    | 70 %        |
| Intensity Coverage:   | 38 %        |
| Protein Localisation: | 492 ... 511 |

Source: 20120314\_VR\_TripleSILAC\_pT1L1T2\_F05  
 Scannumber: 4748  
 Protein: BSU03050; IctE; Idh  
 Peptide Score: 144.09  
 Method: ITMS; CID; 3

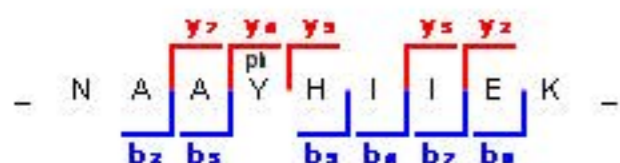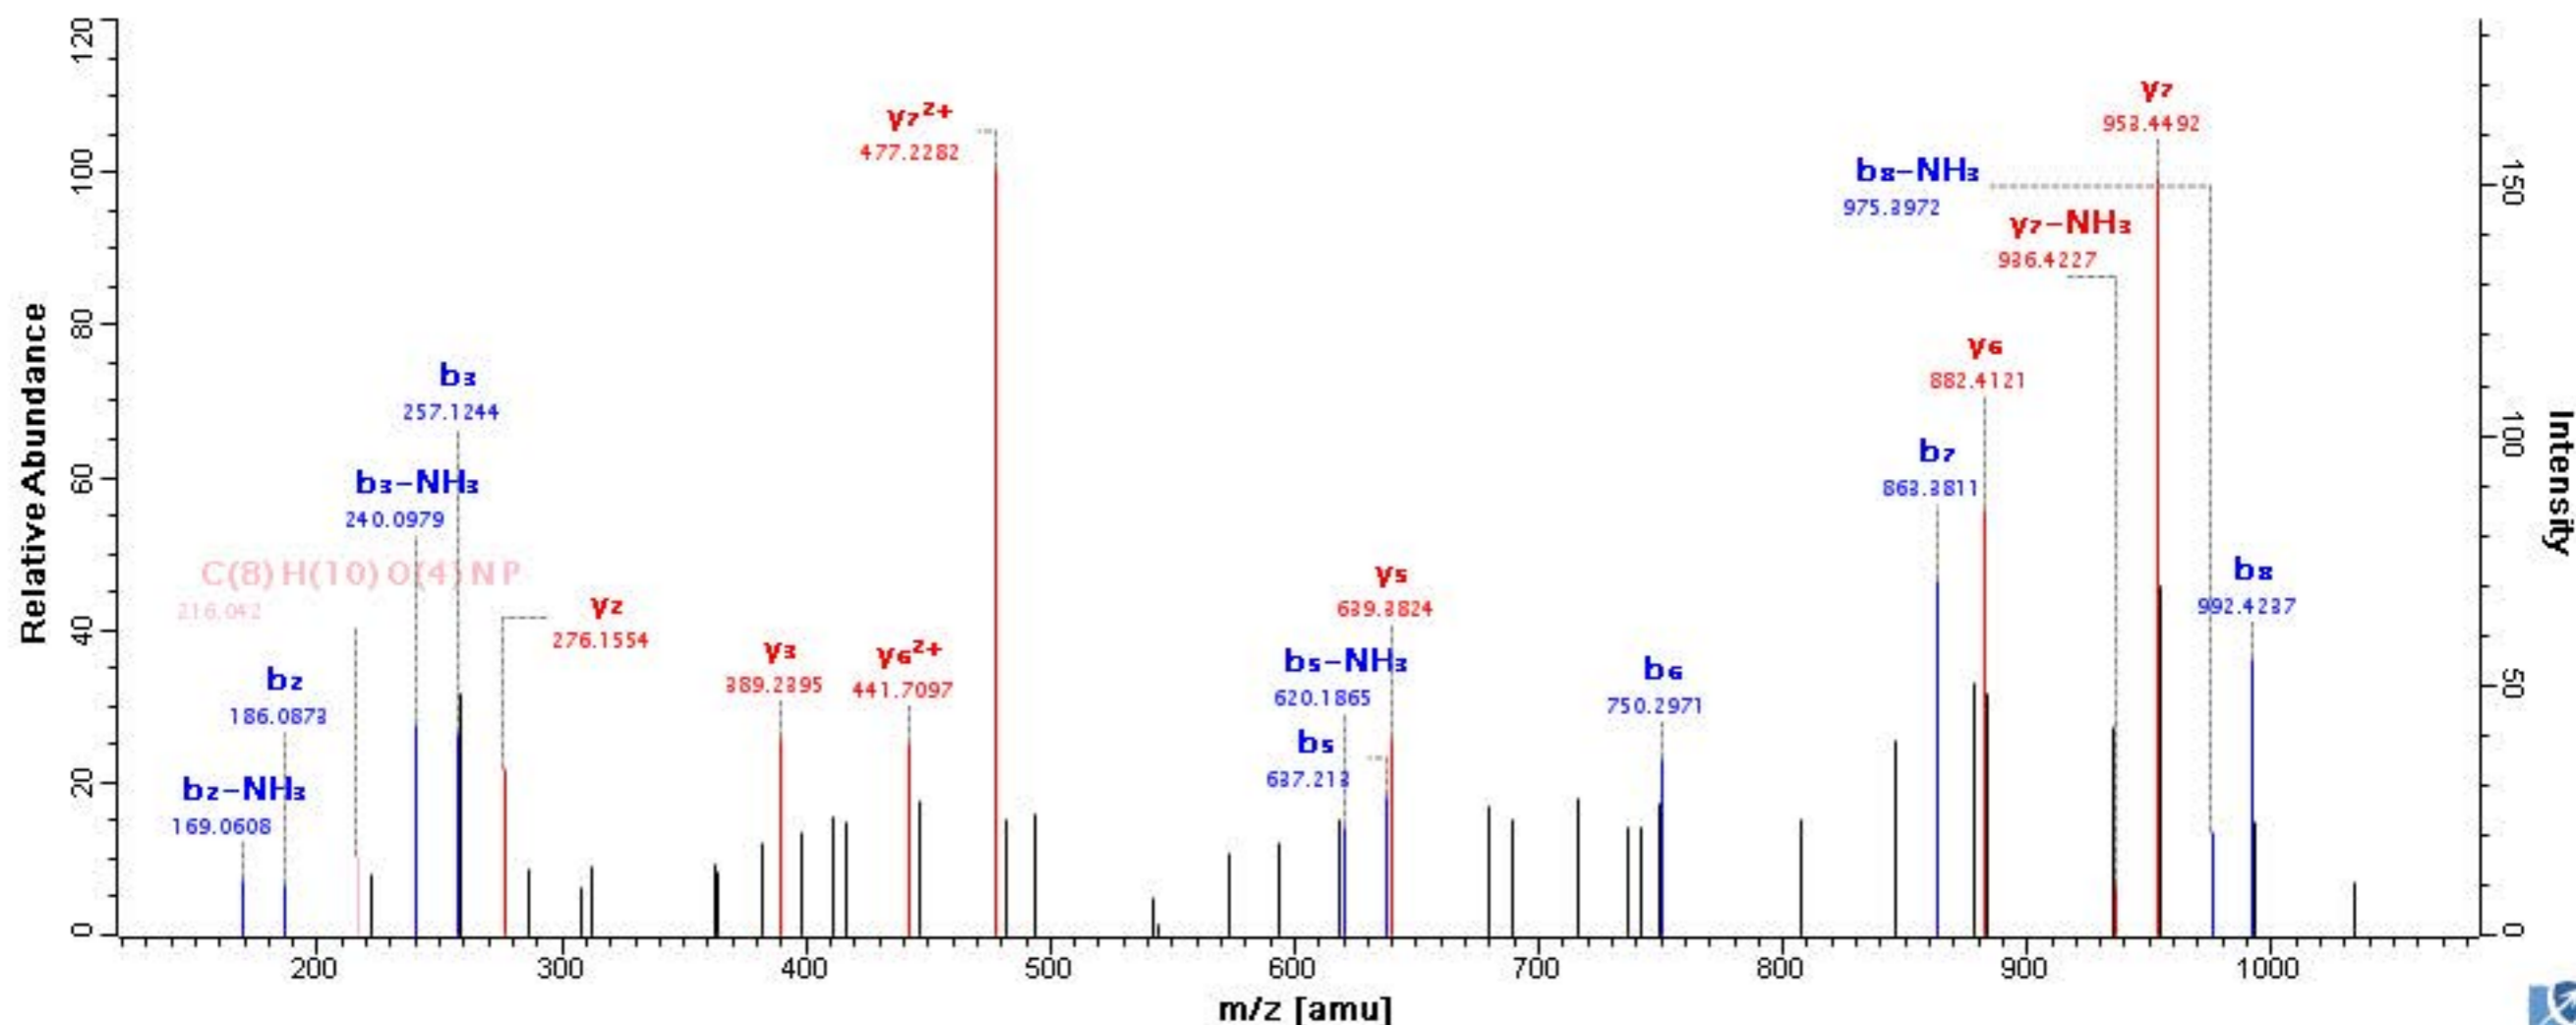

#### precursor information

|                       |                     |
|-----------------------|---------------------|
| Mass:                 | 1137.52182          |
| m/z:                  | System.Collections. |
| Charge:               | System.Collections. |
| Retentiontime:        | System.Collections. |
| Score:                | 144.0888            |
| Mass Error [ppm]:     | -0.13383            |
| PEP:                  | 1.3877E-06          |
| g Precursor Type:     | MULTI               |
| Annotation:           | 7 of 9              |
| AminoAcids Coverag    | 78 %                |
| Intensity Coverage:   | 53 %                |
| Protein Localisation: | 220 ... 228         |

| b ion      |              |   |     |   | y ion        |            | y <sup>2+</sup> ion |            |
|------------|--------------|---|-----|---|--------------|------------|---------------------|------------|
| Δ dalton   | mass         |   | seq |   | Δ dalton     | mass       | Δ dalton            | mass       |
|            | 115.05020391 | 1 | N   | 8 |              |            |                     |            |
| -0.0208962 | 186.0873177  | 2 | A   | 7 | 1024.4863236 |            | 1024.4863236        |            |
| +0.0168039 | 257.12443149 | 3 | A   | 6 | 953.44920982 | -0.0575472 | 477.22824315        | +0.2170083 |
|            | 500.15409044 | 4 | Y   | 5 | 882.41209604 | -0.0027332 | 441.70968625        | -0.0452575 |
| +0.072154  | 637.2130023  | 5 | H   | 4 | 639.38243709 | -0.0421661 | 639.38243709        |            |
| +0.043754  | 750.29706628 | 6 | I   | 3 | 502.32352523 |            | 502.32352523        |            |
| -0.0029564 | 863.38113026 | 7 | I   | 2 | 389.23946125 | +0.0212809 | 389.23946125        |            |
| +0.035261  | 992.42372336 | 8 | E   | 1 | 276.15539727 | +0.112364  | 276.15539727        |            |
|            |              | 9 | K   | 0 | 147.11280417 |            | 147.11280417        |            |



Source: 20120314\_VR\_TripleSILAC\_pT1L1T2\_F07  
 Scannumber: 1391  
 Protein: BSU27850; nadA  
 Peptide Score: 72.7  
 Method: ITMS; CID; 3

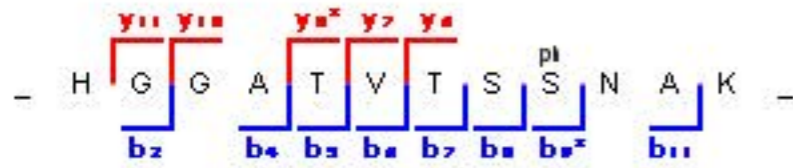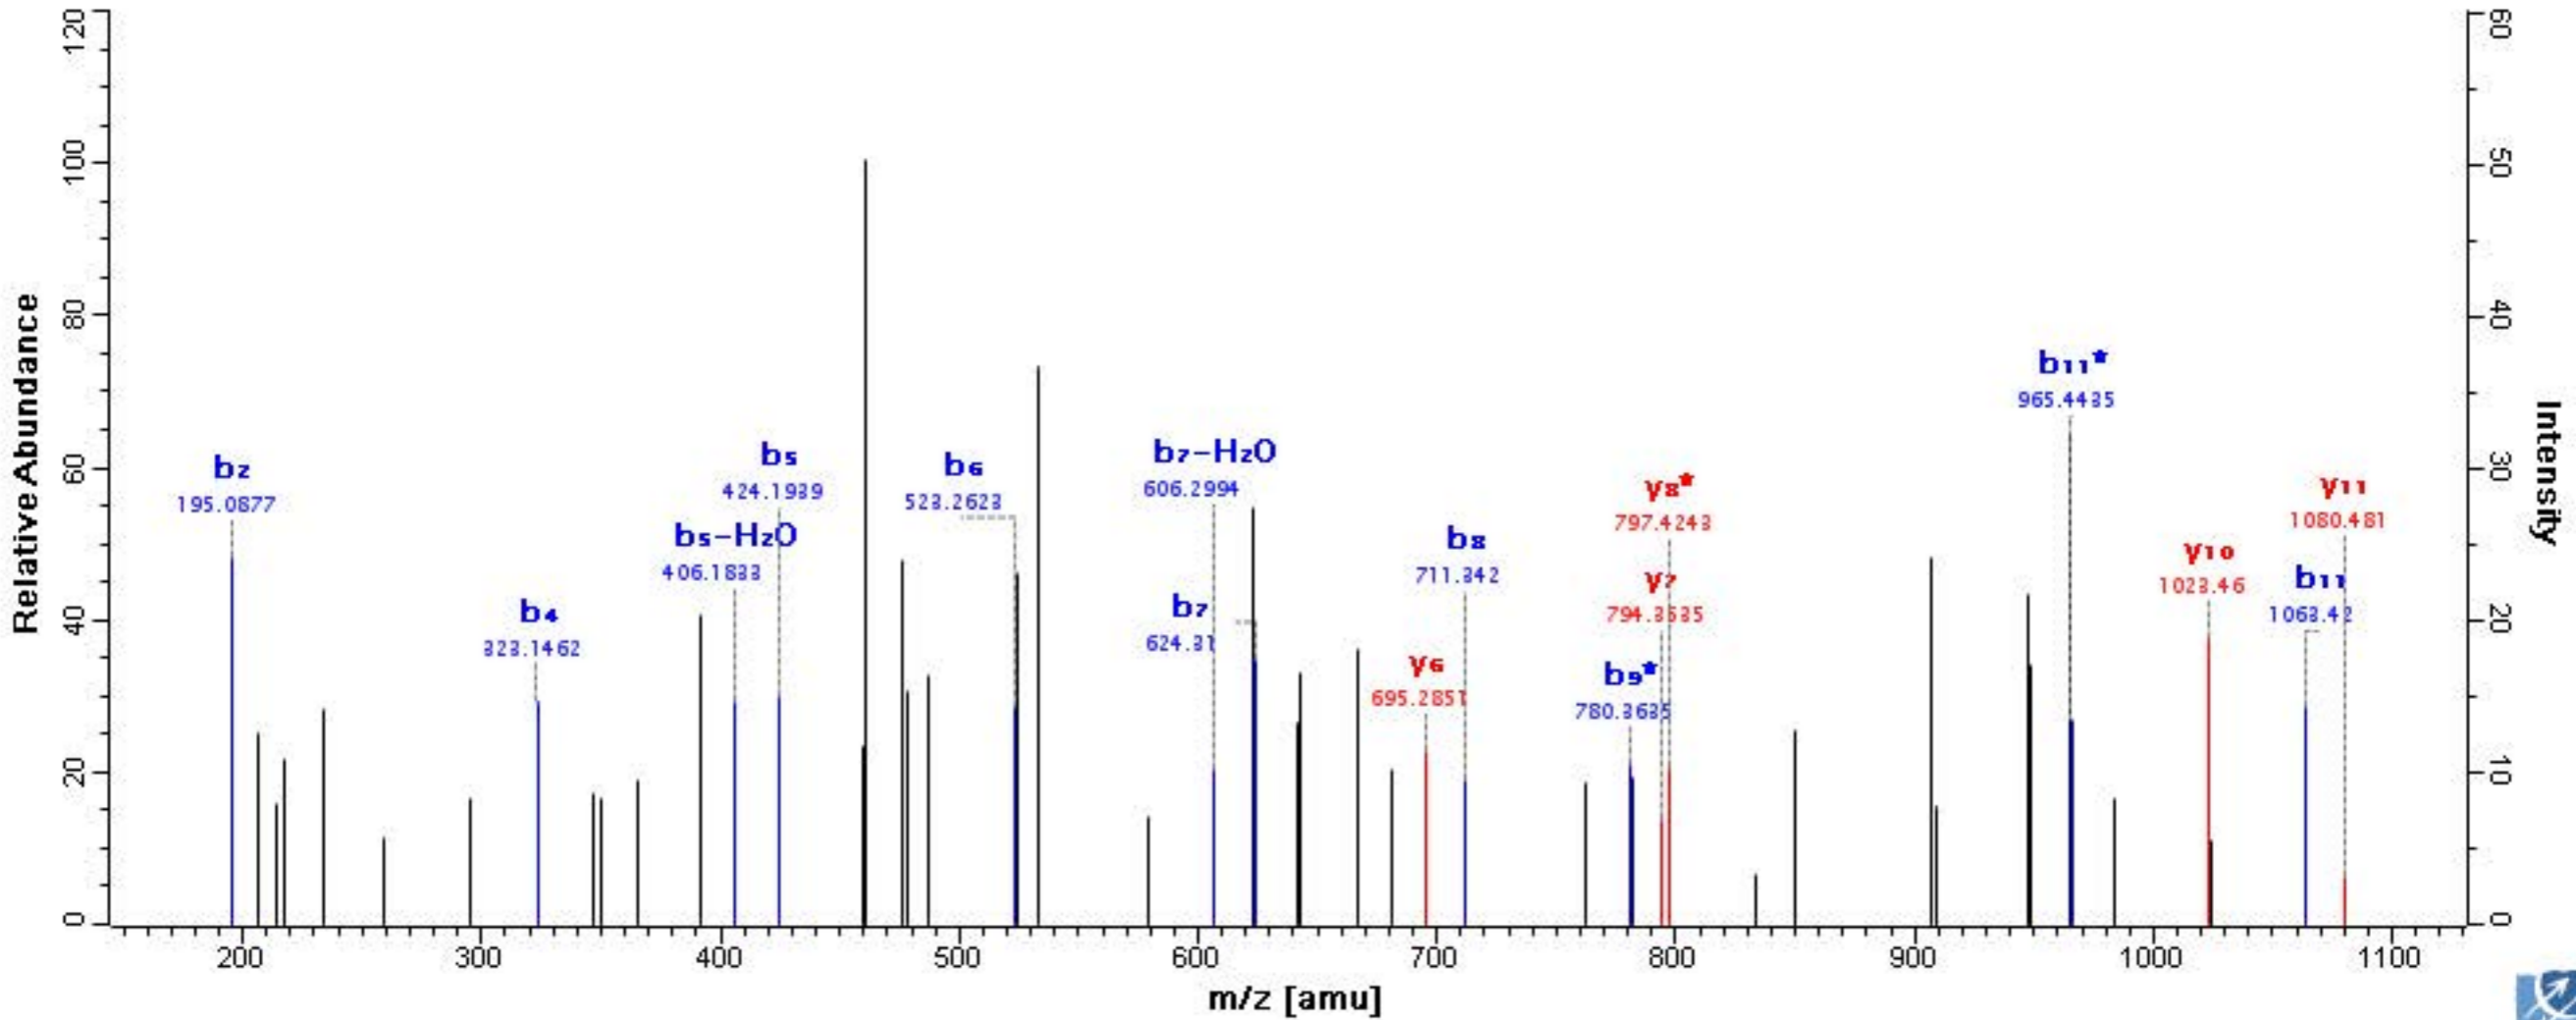

**precursor information**

|                   |                     |
|-------------------|---------------------|
| Mass:             | 1208.51871          |
| m/z:              | System.Collections. |
| Charge:           | System.Collections. |
| Retentiontime:    | System.Collections. |
| Score:            | 72.70486            |
| Mass Error [ppm]: | 0.021031            |
| PEP:              | 0.01275             |
| Precursor Type:   | MULTI               |

**general information**

|                       |             |
|-----------------------|-------------|
| Annotation:           | 10 of 12    |
| AminoAcids Coverag    | 83 %        |
| Intensity Coverage:   | 28 %        |
| Protein Localisation: | 155 ... 166 |

| b ion      |                |    |     |    | y ion          |            |  |
|------------|----------------|----|-----|----|----------------|------------|--|
| Δ dalton   | mass           |    | seq |    | Δ dalton       | mass       |  |
|            | 138.066188329  | 1  | H   | 11 |                |            |  |
| -0.0397089 | 195.087652053  | 2  | G   | 10 | 1080.481243546 | +0.0984684 |  |
|            | 252.109115776  | 3  | G   | 9  | 1023.459779823 | +0.1044292 |  |
| +0.1350815 | 323.146229564  | 4  | A   | 8  | 966.438316099  |            |  |
| +0.1069953 | 424.193908038  | 5  | T   | 7  | 895.401202311  |            |  |
| +0.2281566 | 523.262321954  | 6  | V   | 6  | 794.353523837  | +0.0938028 |  |
| +0.079709  | 624.310000428  | 7  | T   | 5  | 695.285109921  | +0.1769262 |  |
| +0.05      | 711.342028838  | 8  | S   | 4  | 594.237431447  |            |  |
|            | 878.340387657  | 9  | S   | 3  | 507.205403037  |            |  |
|            | 992.383315104  | 10 | N   | 2  | 340.207044219  |            |  |
| +0.140118  | 1063.420428892 | 11 | A   | 1  | 226.164116772  |            |  |
|            |                | 12 | K   | 0  | 155.127002984  |            |  |

Source: 20120314\_VR\_TripleSILAC\_pT1L1T2\_F07  
 Scannumber: 4430  
 Protein: BSU15490; pyrB  
 Peptide Score: 110.84  
 Method: ITMS; CID; 3

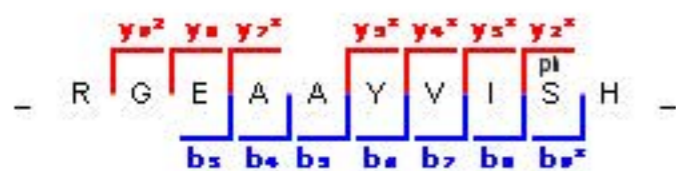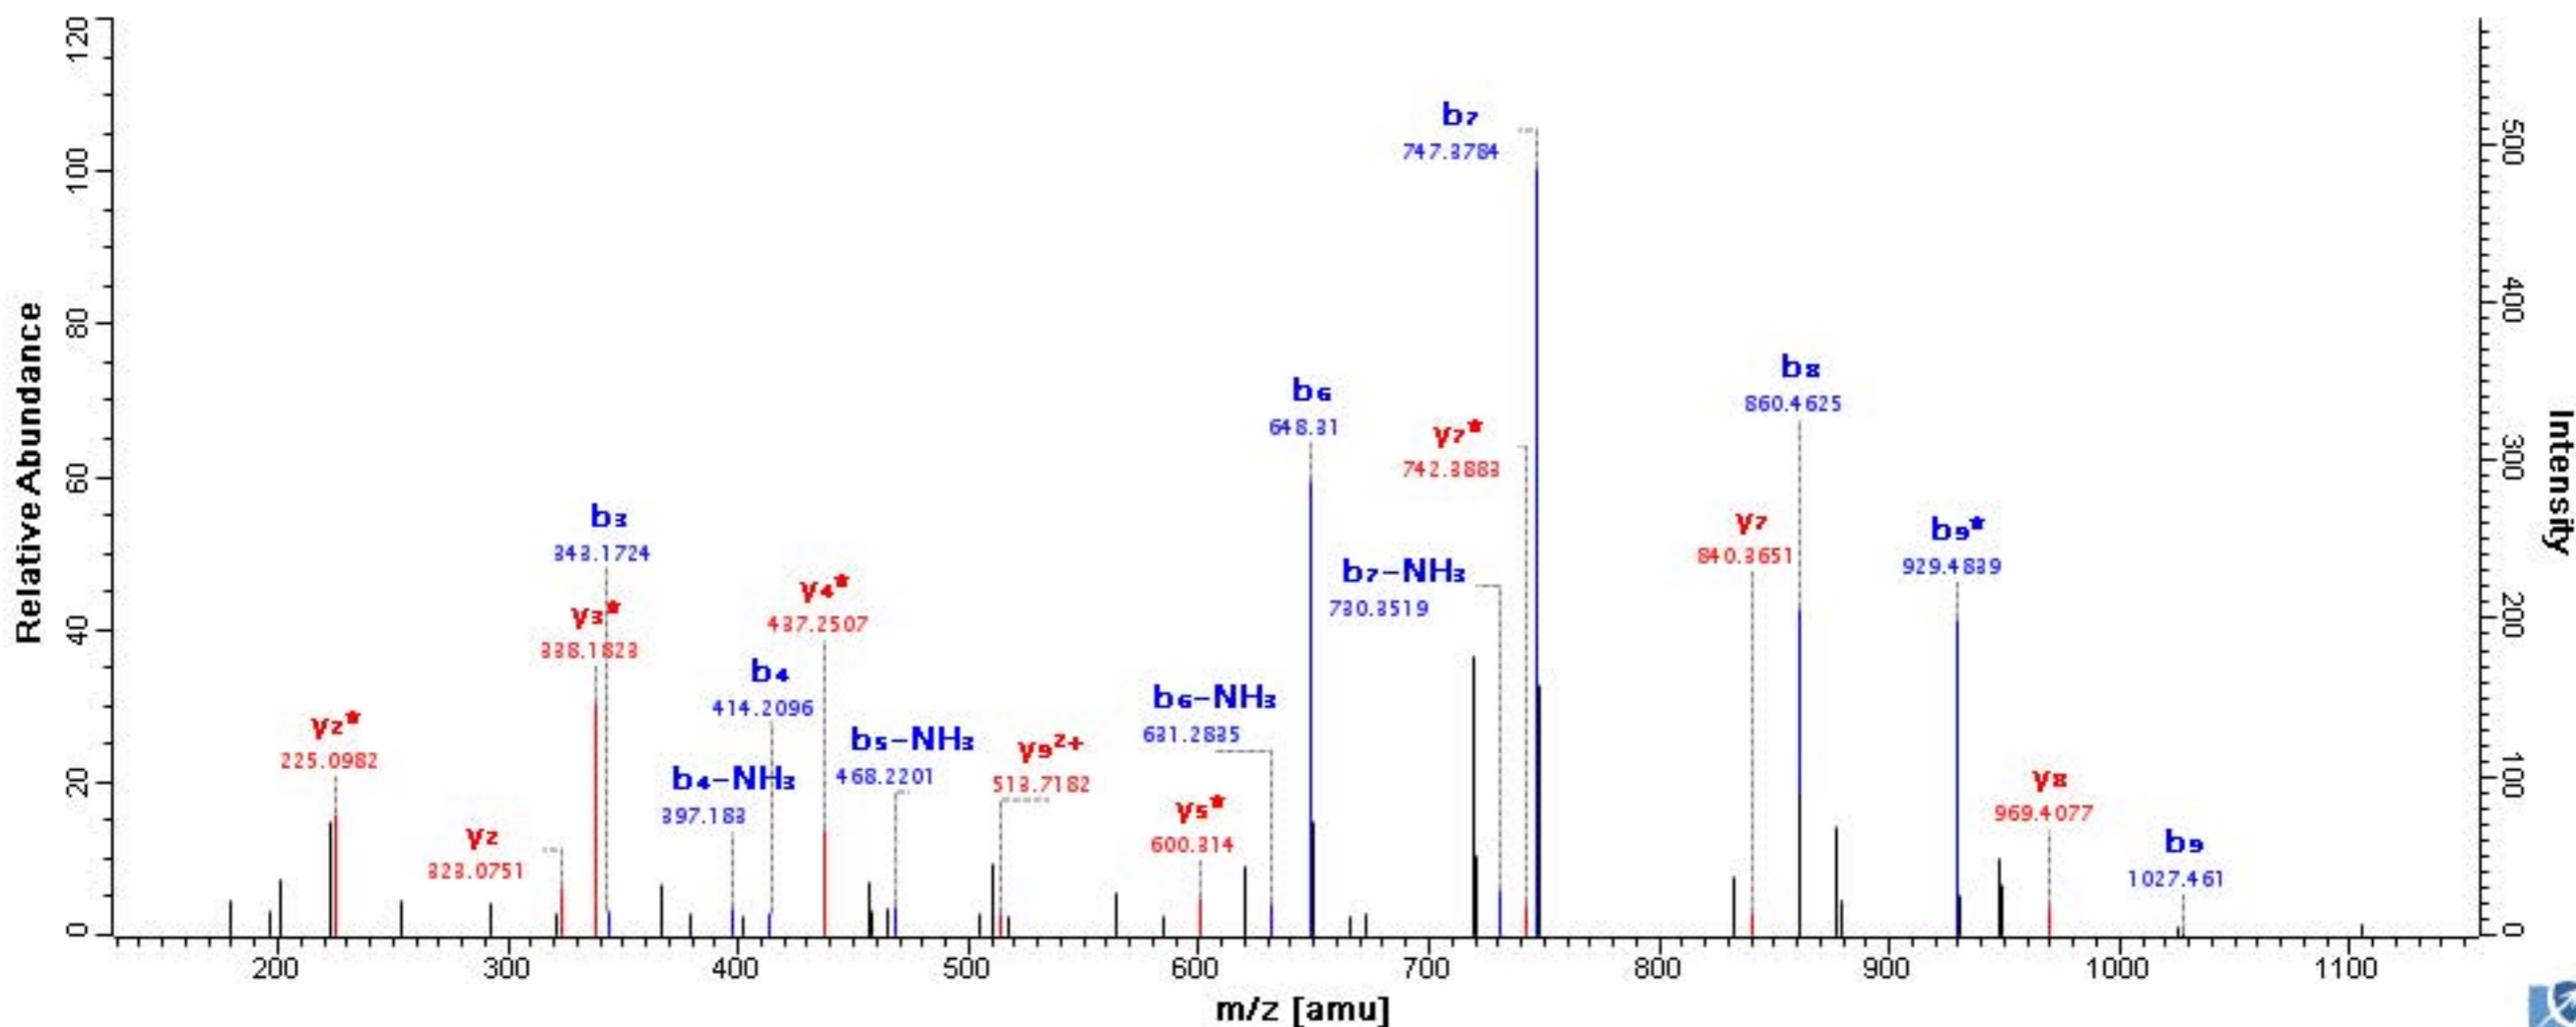

#### precursor information

|                   |                     |
|-------------------|---------------------|
| Mass:             | 1181.52288          |
| m/z:              | System.Collections. |
| Charge:           | System.Collections. |
| Retentiontime:    | System.Collections. |
| Score:            | 110.8379            |
| Mass Error [ppm]: | -0.12946            |
| PEP:              | 0.0011976           |
| Precursor Type:   | ISO                 |

#### general information

|                       |             |
|-----------------------|-------------|
| Annotation:           | 8 of 10     |
| AminoAcids Coverage:  | 80 %        |
| Intensity Coverage:   | 57 %        |
| Protein Localisation: | 295 ... 304 |

| b ion      |              |    |     |   | y ion        |            | y <sup>2+</sup> ion |            |
|------------|--------------|----|-----|---|--------------|------------|---------------------|------------|
| Δ dalton   | mass         |    | seq |   | Δ dalton     | mass       | Δ dalton            | mass       |
|            | 157.10838749 | 1  | R   | 9 |              |            |                     |            |
|            | 214.12985122 | 2  | G   | 8 | 1026.4292027 |            | 513.71823957        | -0.3502586 |
| +0.0963545 | 343.17244431 | 3  | E   | 7 | 969.40773894 | -0.0095456 | 969.40773894        |            |
| -0.1917969 | 414.2095581  | 4  | A   | 6 | 840.36514584 | -0.3692352 | 840.36514584        |            |
|            | 485.24667189 | 5  | A   | 5 | 769.32803206 |            | 769.32803206        |            |
| +0.051877  | 648.31000043 | 6  | Y   | 4 | 698.29091827 |            | 698.29091827        |            |
| -0.0933802 | 747.37841434 | 7  | V   | 3 | 535.22758973 |            | 535.22758973        |            |
| -0.0228421 | 860.46247832 | 8  | I   | 2 | 436.15917581 |            | 436.15917581        |            |
| +0.117532  | 1027.4608371 | 9  | S   | 1 | 323.07511183 | +0.1289897 | 323.07511183        |            |
|            |              | 10 | H   | 0 | 156.07675302 |            | 156.07675302        |            |

Source: 20120314\_VR\_TripleSILAC\_pT1L1T2\_F11  
 Scannumber: 8431  
 Protein: BSU01300; rpsH  
 Peptide Score: 94.72  
 Method: ITMS; CID; 3

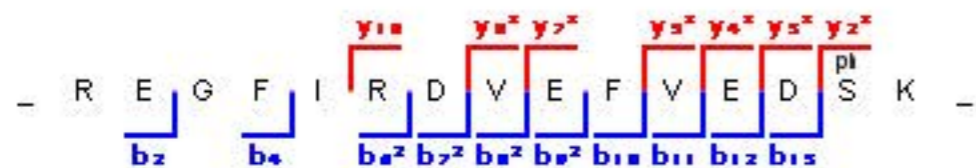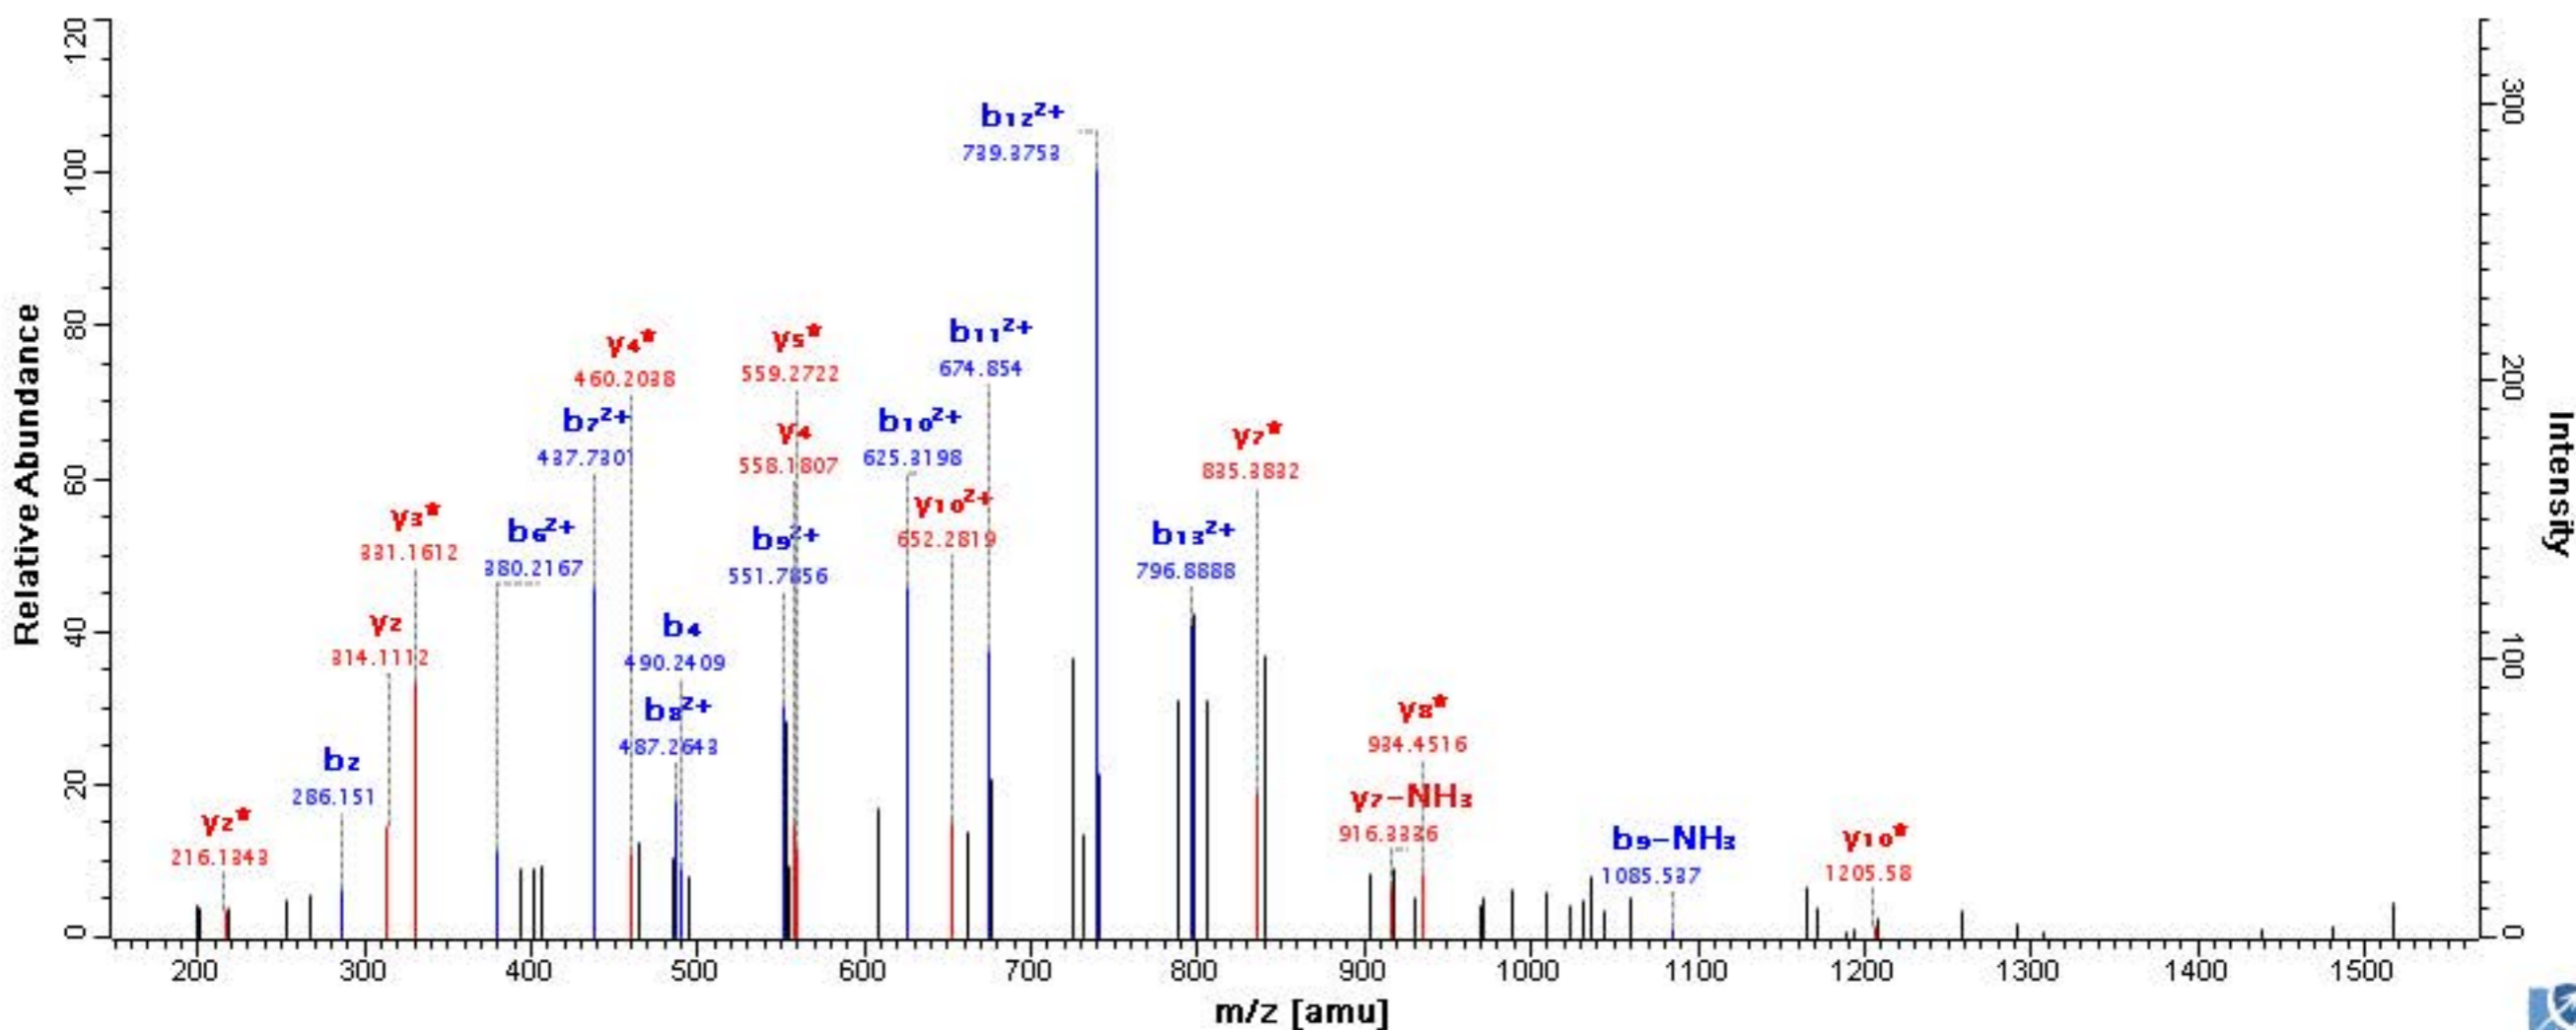

**precursor information**

|                   |                     |
|-------------------|---------------------|
| Mass:             | 1904.86717          |
| m/z:              | System.Collections. |
| Charge:           | System.Collections. |
| Retentiontime:    | System.Collections. |
| Score:            | 94.71677            |
| Mass Error [ppm]: | 0.10994             |
| PEP:              | 0.0070557           |
| Precursor Type:   | MULTI               |

| b <sup>2+</sup> ion |          | b ion     |          |     | y ion |          | y <sup>2+</sup> ion |           |          |
|---------------------|----------|-----------|----------|-----|-------|----------|---------------------|-----------|----------|
| Δ dalton            | mass     | Δ dalton  | mass     | seq |       | Δ dalton | mass                | Δ dalton  | mass     |
|                     | 157.1084 |           | 157.1084 | 1   | R     | 14       |                     |           |          |
|                     | 286.151  | -0.09376  | 286.151  | 2   | E     | 13       | 1749.773            |           | 1749.773 |
|                     | 343.1724 |           | 343.1724 | 3   | G     | 12       | 1620.731            |           | 1620.731 |
|                     | 490.2409 | +0.094713 | 490.2409 | 4   | F     | 11       | 1563.709            |           | 1563.709 |
|                     | 603.3249 |           | 603.3249 | 5   | I     | 10       | 1416.641            |           | 1416.641 |
| +0.038716           | 380.2167 |           | 759.426  | 6   | R     | 9        | 1303.557            |           | 652.2819 |
| +0.006141           | 437.7301 |           | 874.453  | 7   | D     | 8        | 1147.455            |           | 1147.455 |
| -0.249014           | 487.2643 |           | 973.5214 | 8   | V     | 7        | 1032.429            |           | 1032.429 |
| -0.083787           | 551.7856 |           | 1102.564 | 9   | E     | 6        | 933.3601            |           | 933.3601 |
| +0.192675           | 625.3198 |           | 1249.632 | 10  | F     | 5        | 804.3175            |           | 804.3175 |
| +0.13027            | 674.854  |           | 1348.701 | 11  | V     | 4        | 657.2491            |           | 657.2491 |
| +0.043056           | 739.3753 |           | 1477.743 | 12  | E     | 3        | 558.1807            | -0.228856 | 558.1807 |
| -0.005816           | 796.8888 |           | 1592.77  | 13  | D     | 2        | 429.1381            |           | 429.1381 |
|                     | 1759.769 |           | 1759.769 | 14  | S     | 1        | 314.1112            | -0.054126 | 314.1112 |
|                     |          |           |          | 15  | K     | 0        | 147.1128            |           | 147.1128 |

**general information**

|                       |           |
|-----------------------|-----------|
| Annotation:           | 11 of 15  |
| AminoAcids Coverag    | 73 %      |
| Intensity Coverage:   | 50 %      |
| Protein Localisation: | 42 ... 56 |

Source: 20120314\_VR\_TripleSILAC\_pT1 L1 T2\_F17  
 Scannumber: 10521  
 Protein: BSU13180; metC; metE  
 Peptide Score: 107.33  
 Method: ITMS; CID; 3

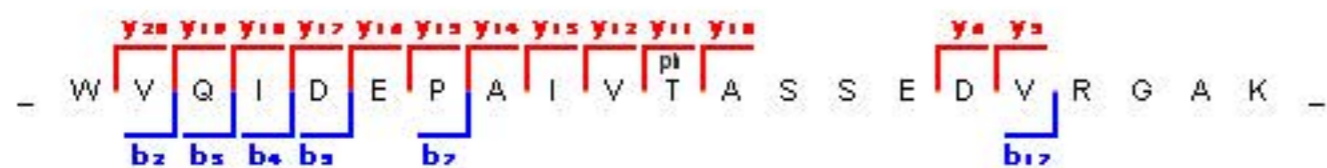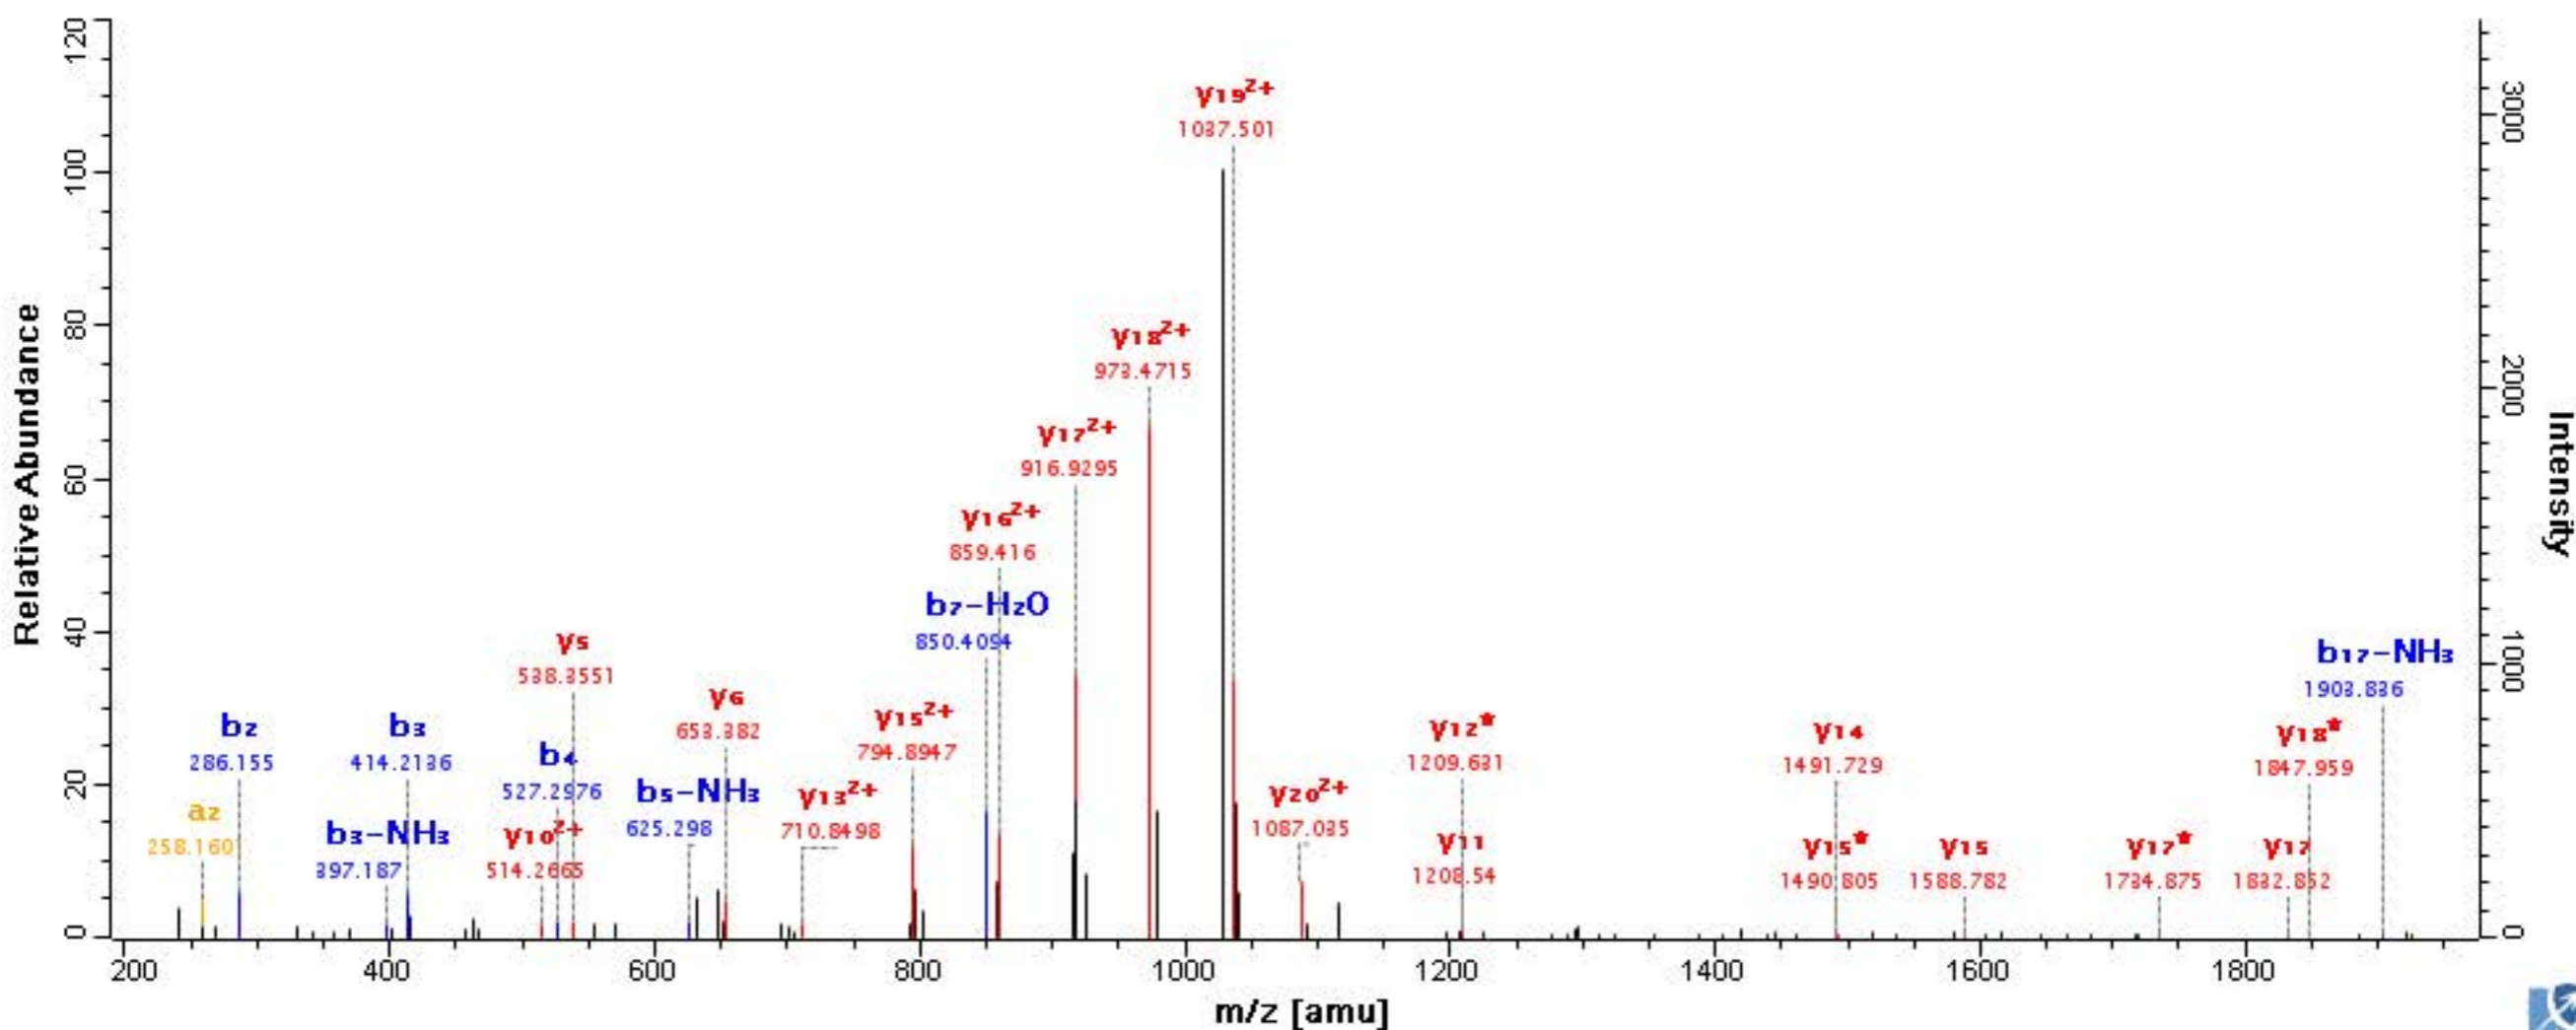

#### precursor information

|                   |                     |
|-------------------|---------------------|
| Mass:             | 2350.11951          |
| m/z:              | System.Collections. |
| Charge:           | System.Collections. |
| Retentiontime:    | System.Collections. |
| Score:            | 107.3267            |
| Mass Error [ppm]: | -0.46524            |
| PEP:              | 8.4282E-11          |
| Precursor Type:   | MULTI               |

| a ion        |          | b ion        |          |    |     |    | gamma ion    |           | gamma^2+ ion |           |
|--------------|----------|--------------|----------|----|-----|----|--------------|-----------|--------------|-----------|
| delta dalton | mass     | delta dalton | mass     |    | seq |    | delta dalton | mass      | delta dalton | mass      |
|              | 159.0917 |              | 187.0866 | 1  | W   | 20 |              |           |              |           |
| +0.007453    | 258.1601 | +0.034267    | 286.155  | 2  | V   | 19 | 2173.063     |           | 1087.035     | +0.251721 |
|              | 386.2187 | -0.003315    | 414.2136 | 3  | Q   | 18 | 2073.994     |           | 1037.501     | -0.117026 |
|              | 499.3027 | -0.061256    | 527.2976 | 4  | I   | 17 | 1945.936     |           | 973.4715     | +0.202241 |
|              | 614.3297 |              | 642.3246 | 5  | D   | 16 | 1832.852     | +0.343234 | 916.9295     | -0.039907 |
|              | 743.3723 |              | 771.3672 | 6  | E   | 15 | 1717.825     |           | 859.416      | +0.133843 |
|              | 840.425  |              | 868.4199 | 7  | P   | 14 | 1588.782     | -0.370189 | 794.8947     | -0.029431 |
|              | 911.4621 |              | 939.4571 | 8  | A   | 13 | 1491.729     | +0.436847 | 1491.729     |           |
|              | 1024.546 |              | 1052.541 | 9  | I   | 12 | 1420.692     |           | 710.8498     | +0.079106 |
|              | 1123.615 |              | 1151.61  | 10 | V   | 11 | 1307.608     |           | 1307.608     |           |
|              | 1304.629 |              | 1332.624 | 11 | T   | 10 | 1208.54      | +0.006199 | 1208.54      |           |
|              | 1375.666 |              | 1403.661 | 12 | A   | 9  | 1027.526     |           | 514.2665     | -0.014164 |
|              | 1462.698 |              | 1490.693 | 13 | S   | 8  | 956.4887     |           | 956.4887     |           |
|              | 1549.73  |              | 1577.725 | 14 | S   | 7  | 869.4567     |           | 869.4567     |           |
|              | 1678.772 |              | 1706.767 | 15 | E   | 6  | 782.4246     |           | 782.4246     |           |
|              | 1793.799 |              | 1821.794 | 16 | D   | 5  | 653.382      | +0.171968 | 653.382      |           |
|              | 1892.868 |              | 1920.863 | 17 | V   | 4  | 538.3551     | -0.123233 | 538.3551     |           |
|              | 2048.969 |              | 2076.964 | 18 | R   | 3  | 439.2867     |           | 439.2867     |           |
|              | 2105.99  |              | 2133.985 | 19 | G   | 2  | 283.1856     |           | 283.1856     |           |
|              | 2177.027 |              | 2205.022 | 20 | A   | 1  | 226.1641     |           | 226.1641     |           |
|              |          |              |          | 21 | K   | 0  | 155.127      |           | 155.127      |           |

#### general information

|                       |             |
|-----------------------|-------------|
| Annotation:           | 14 of 21    |
| AminoAcids Coverage:  | 67 %        |
| Intensity Coverage:   | 41 %        |
| Protein Localisation: | 200 ... 220 |

Source: 20120314\_VR\_TripleSILAC\_pT1L1T2\_F17  
 Scannumber: 4471  
 Protein: accD; BSU29210; yttI  
 Peptide Score: 107.24  
 Method: ITMS; CID; 3

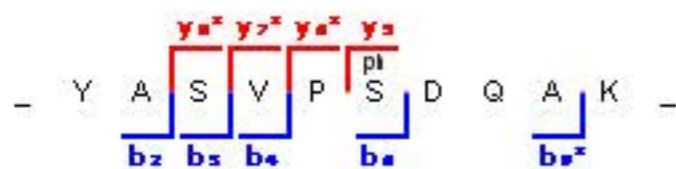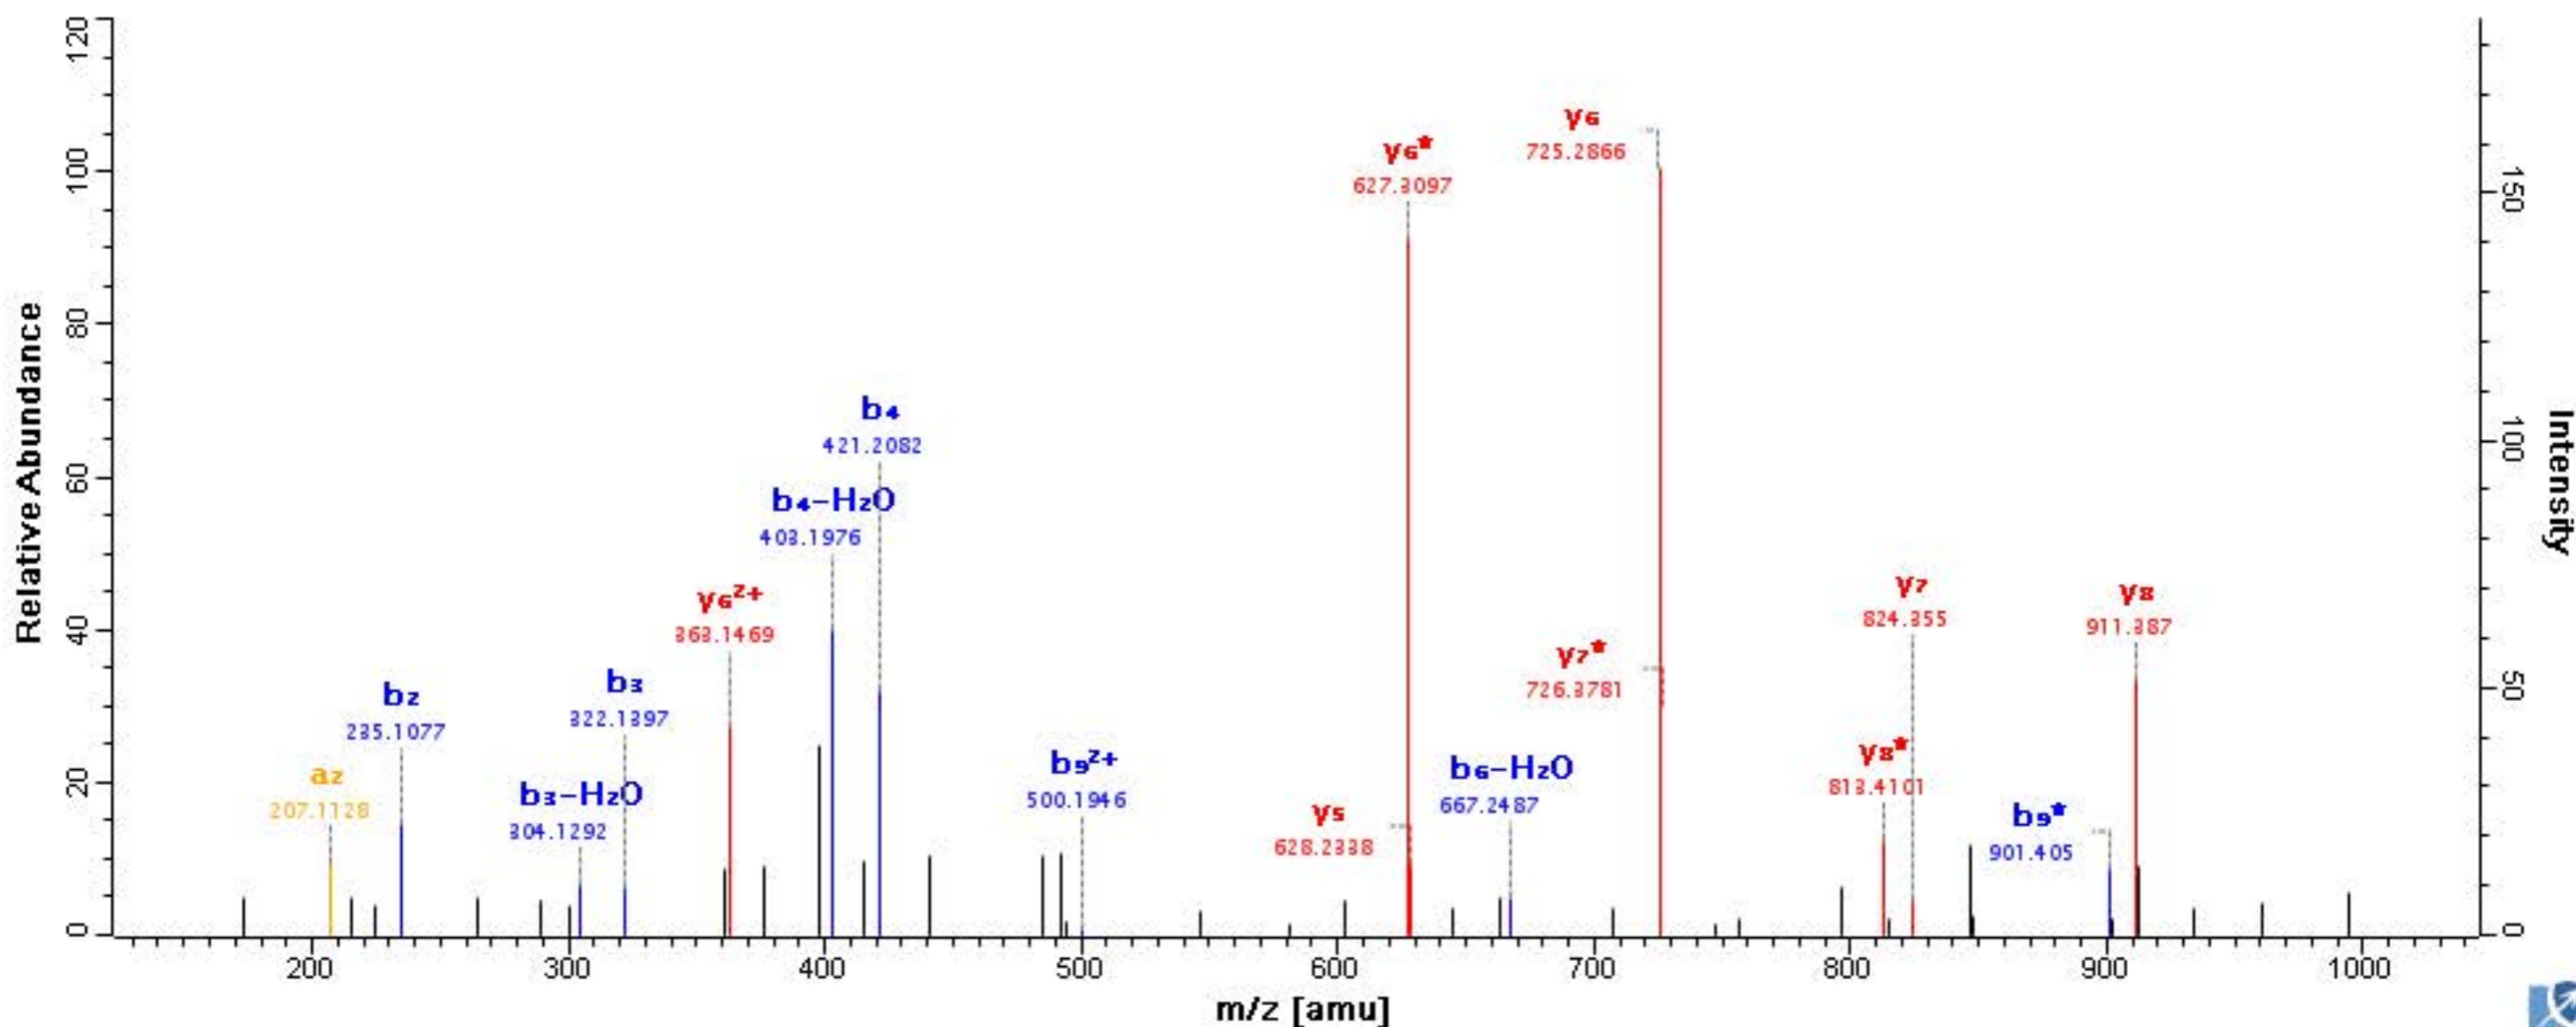

#### precursor information

|                   |                     |
|-------------------|---------------------|
| Mass:             | 1144.48032          |
| m/z:              | System.Collections. |
| Charge:           | System.Collections. |
| Retentiontime:    | System.Collections. |
| Score:            | 107.244             |
| Mass Error [ppm]: | 0.12849             |
| PEP:              | 0.0015359           |
| Precursor Type:   | MULTI               |

#### general information

|                       |           |
|-----------------------|-----------|
| Annotation:           | 7 of 10   |
| AminoAcids Coverage:  | 70 %      |
| Intensity Coverage:   | 70 %      |
| Protein Localisation: | 12 ... 21 |

| a ion    |         | b <sup>2+</sup> ion |         | b ion    |         |    |     |   | y ion    |          | y <sup>2+</sup> ion |         |
|----------|---------|---------------------|---------|----------|---------|----|-----|---|----------|----------|---------------------|---------|
| Δ dalton | mass    | Δ dalton            | mass    | Δ dalton | mass    |    | seq |   | Δ dalton | mass     | Δ dalton            | mass    |
|          | 136.076 |                     | 164.071 |          | 164.071 | 1  | Y   | 9 |          |          |                     |         |
| -0.027   | 207.113 |                     | 235.108 | +0.01659 | 235.108 | 2  | A   | 8 | 982.424  |          | 982.424             |         |
|          | 294.145 |                     | 322.14  | +0.15084 | 322.14  | 3  | S   | 7 | 911.387  | -0.0796  | 911.387             |         |
|          | 393.213 |                     | 421.208 | -0.0107  | 421.208 | 4  | V   | 6 | 824.355  | +0.19074 | 824.355             |         |
|          | 490.266 |                     | 518.261 |          | 518.261 | 5  | P   | 5 | 725.287  | +0.05505 | 725.287             | +0.0648 |
|          | 657.264 |                     | 685.259 |          | 685.259 | 6  | S   | 4 | 628.234  | +0.13656 | 628.234             |         |
|          | 772.291 |                     | 800.286 |          | 800.286 | 7  | D   | 3 | 461.235  |          | 461.235             |         |
|          | 900.35  |                     | 928.345 |          | 928.345 | 8  | Q   | 2 | 346.208  |          | 346.208             |         |
|          | 971.387 | +0.05369            | 500.195 |          | 999.382 | 9  | A   | 1 | 218.15   |          | 218.15              |         |
|          |         |                     |         |          |         | 10 | K   | 0 | 147.113  |          | 147.113             |         |

Source: 201 20314\_VR\_TripleSILAC\_pT1 L1 T2\_F1 8  
 Scannumber: 13370  
 Protein: BSU27660; yrzD  
 Peptide Score: 171.35  
 Method: ITMS; CID; 3

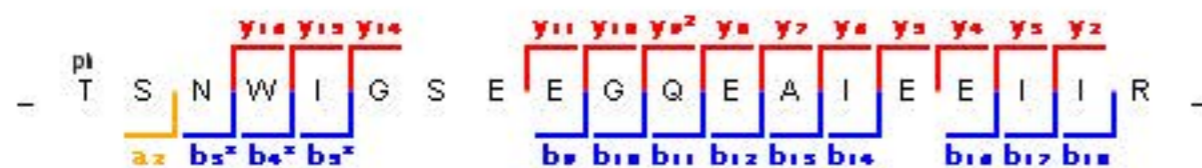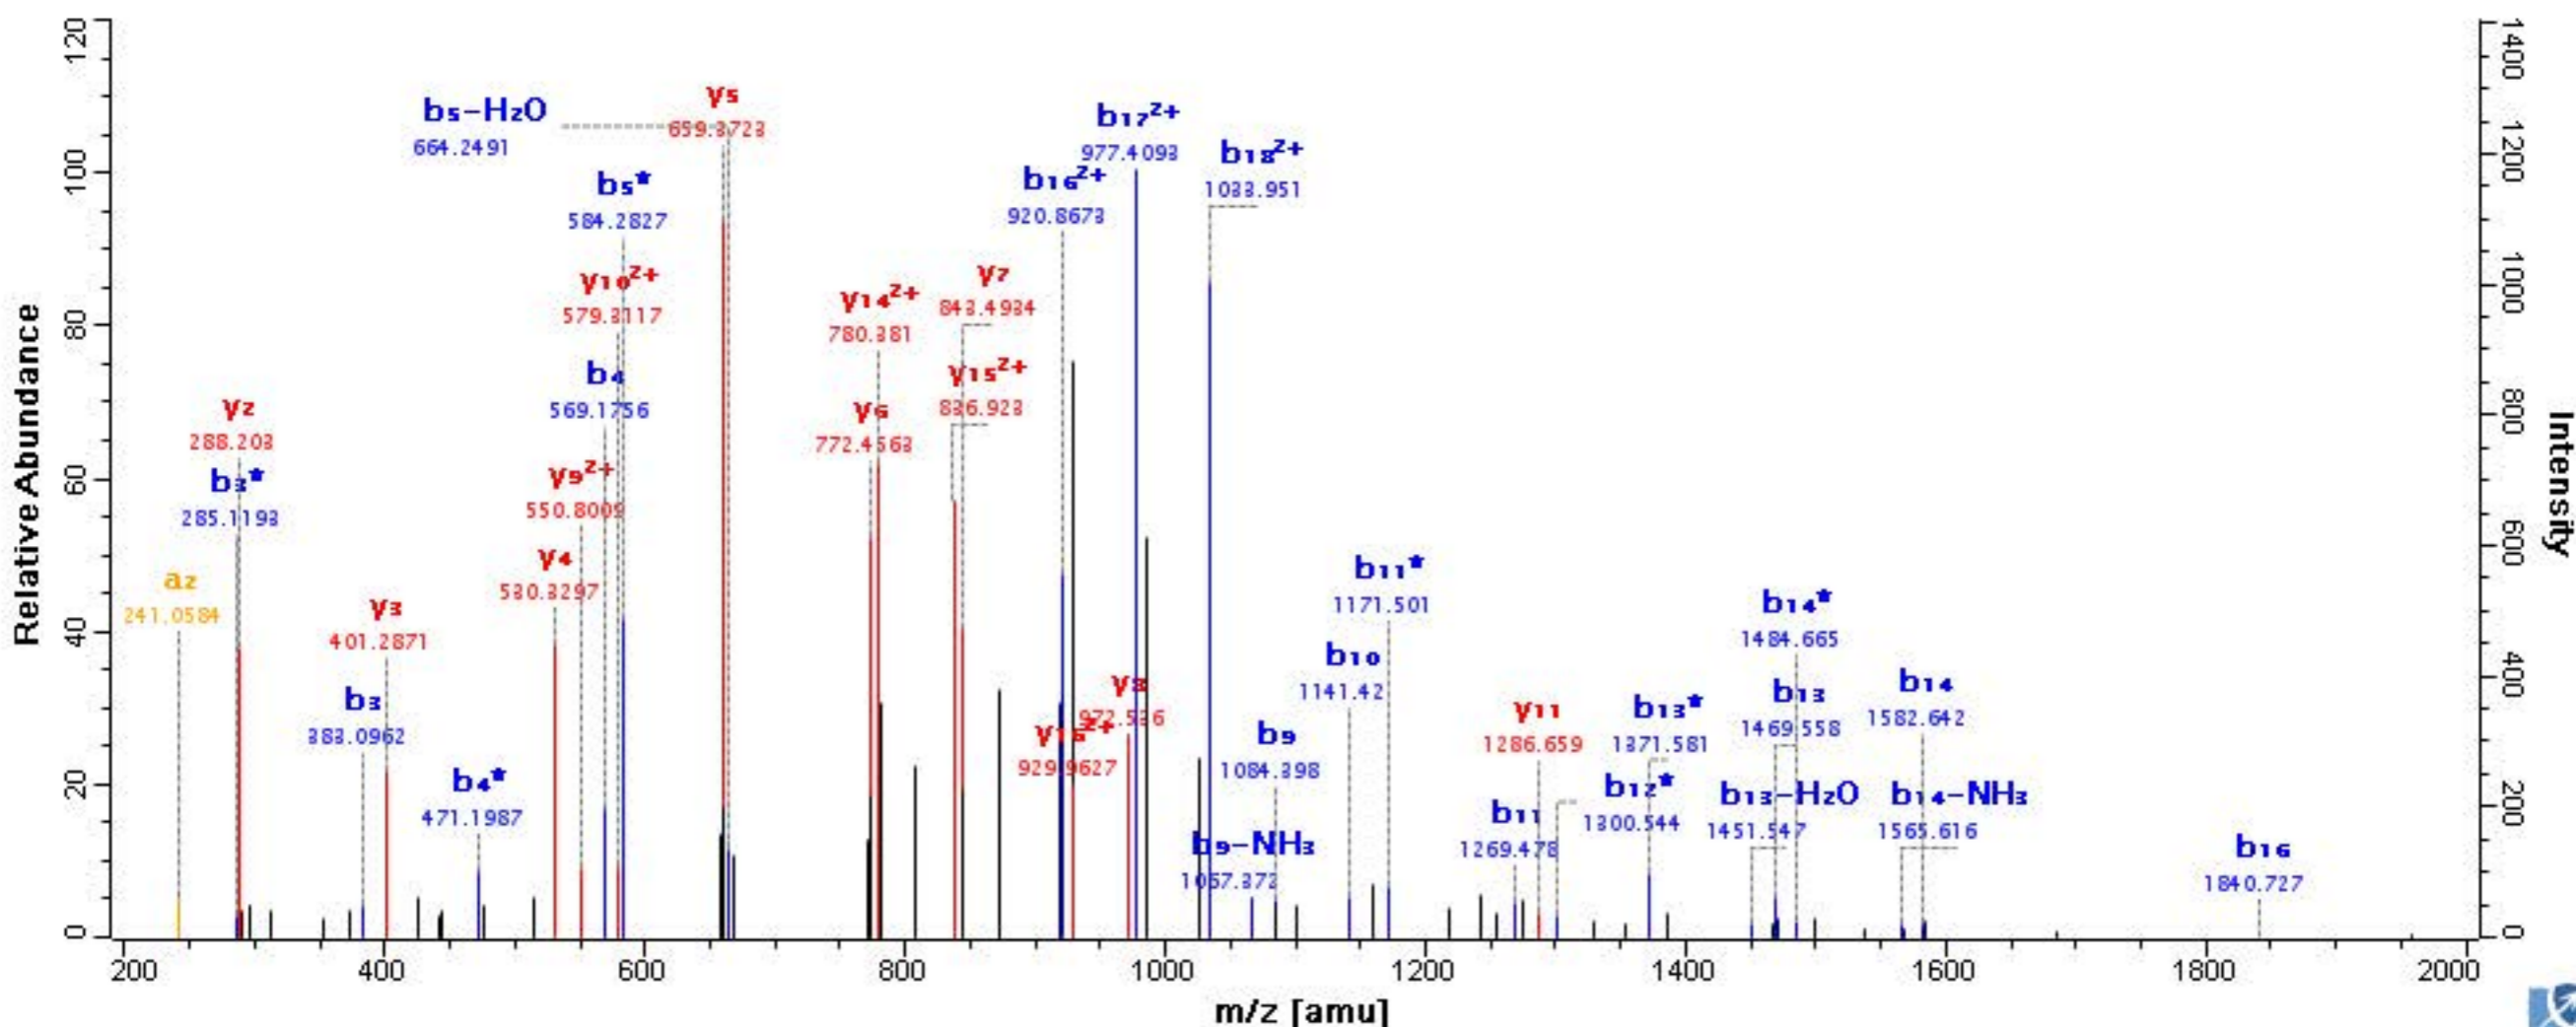

#### precursor information

|                   |                     |
|-------------------|---------------------|
| Mass:             | 2239.99994          |
| m/z:              | System.Collections. |
| Charge:           | System.Collections. |
| Retentiontime:    | System.Collections. |
| Score:            | 171.3528            |
| Mass Error [ppm]: | 0.052471            |
| PEP:              | 5.2603E-40          |
| Precursor Type:   | ISO                 |

| a ion    |         | b <sup>2+</sup> ion |         | b ion    |         | y ion    |      | y <sup>2+</sup> ion |         |
|----------|---------|---------------------|---------|----------|---------|----------|------|---------------------|---------|
| Δ dalton | mass    | Δ dalton            | mass    | Δ dalton | mass    | Δ dalton | mass | Δ dalton            | mass    |
|          | 154.026 |                     | 182.021 |          | 182.021 | 1        | T    | 18                  |         |
| +0.01367 | 241.058 |                     | 269.053 |          | 269.053 | 2        | S    | 17                  | 2059.99 |
|          | 355.101 |                     | 383.096 | +0.03352 | 383.096 | 3        | N    | 16                  | 1972.96 |
|          | 541.181 |                     | 569.176 | -0.0374  | 569.176 | 4        | W    | 15                  | 1858.92 |
|          | 654.265 |                     | 682.26  |          | 682.26  | 5        | I    | 14                  | 1672.84 |
|          | 711.286 |                     | 739.281 |          | 739.281 | 6        | G    | 13                  | 1559.75 |
|          | 798.318 |                     | 826.313 |          | 826.313 | 7        | S    | 12                  | 1502.73 |
|          | 927.361 |                     | 955.356 |          | 955.356 | 8        | E    | 11                  | 1415.7  |
|          | 1056.4  |                     | 1084.4  | -0.3728  | 1084.4  | 9        | E    | 10                  | 1286.66 |
|          | 1113.42 |                     | 1141.42 | +0.07328 | 1141.42 | 10       | G    | 9                   | 1157.62 |
|          | 1241.48 |                     | 1269.48 | +0.09698 | 1269.48 | 11       | Q    | 8                   | 1100.59 |
|          | 1370.53 |                     | 1398.52 |          | 1398.52 | 12       | E    | 7                   | 972.536 |
|          | 1441.56 |                     | 1469.56 | -0.4205  | 1469.56 | 13       | A    | 6                   | 843.493 |
|          | 1554.65 |                     | 1582.64 | -0.3585  | 1582.64 | 14       | I    | 5                   | 772.456 |
|          | 1683.69 |                     | 1711.68 |          | 1711.68 | 15       | E    | 4                   | 659.372 |
|          | 1812.73 | +0.1683             | 920.867 | -0.3546  | 1840.73 | 16       | E    | 3                   | 530.33  |
|          | 1925.82 | +0.15245            | 977.409 |          | 1953.81 | 17       | I    | 2                   | 401.287 |
|          | 2038.9  | +0.28632            | 1033.95 |          | 2066.9  | 18       | I    | 1                   | 288.203 |
|          |         |                     |         |          |         | 19       | R    | 0                   | 175.119 |

#### general information

|                       |           |
|-----------------------|-----------|
| Annotation:           | 15 of 19  |
| AminoAcids Coverage:  | 79 %      |
| Intensity Coverage:   | 63 %      |
| Protein Localisation: | 80 ... 98 |

Source: 20120314\_VR\_TripleSILAC\_pT1L1T2\_F18  
 Scannumber: 2189  
 Protein: BSU38960; N15NR; yxjG  
 Peptide Score: 131.83  
 Method: ITMS; CID; 3

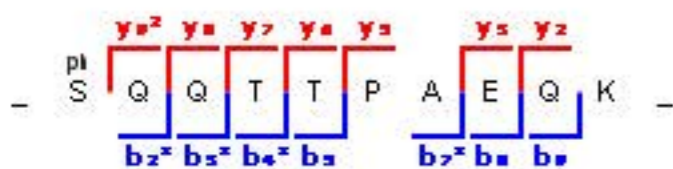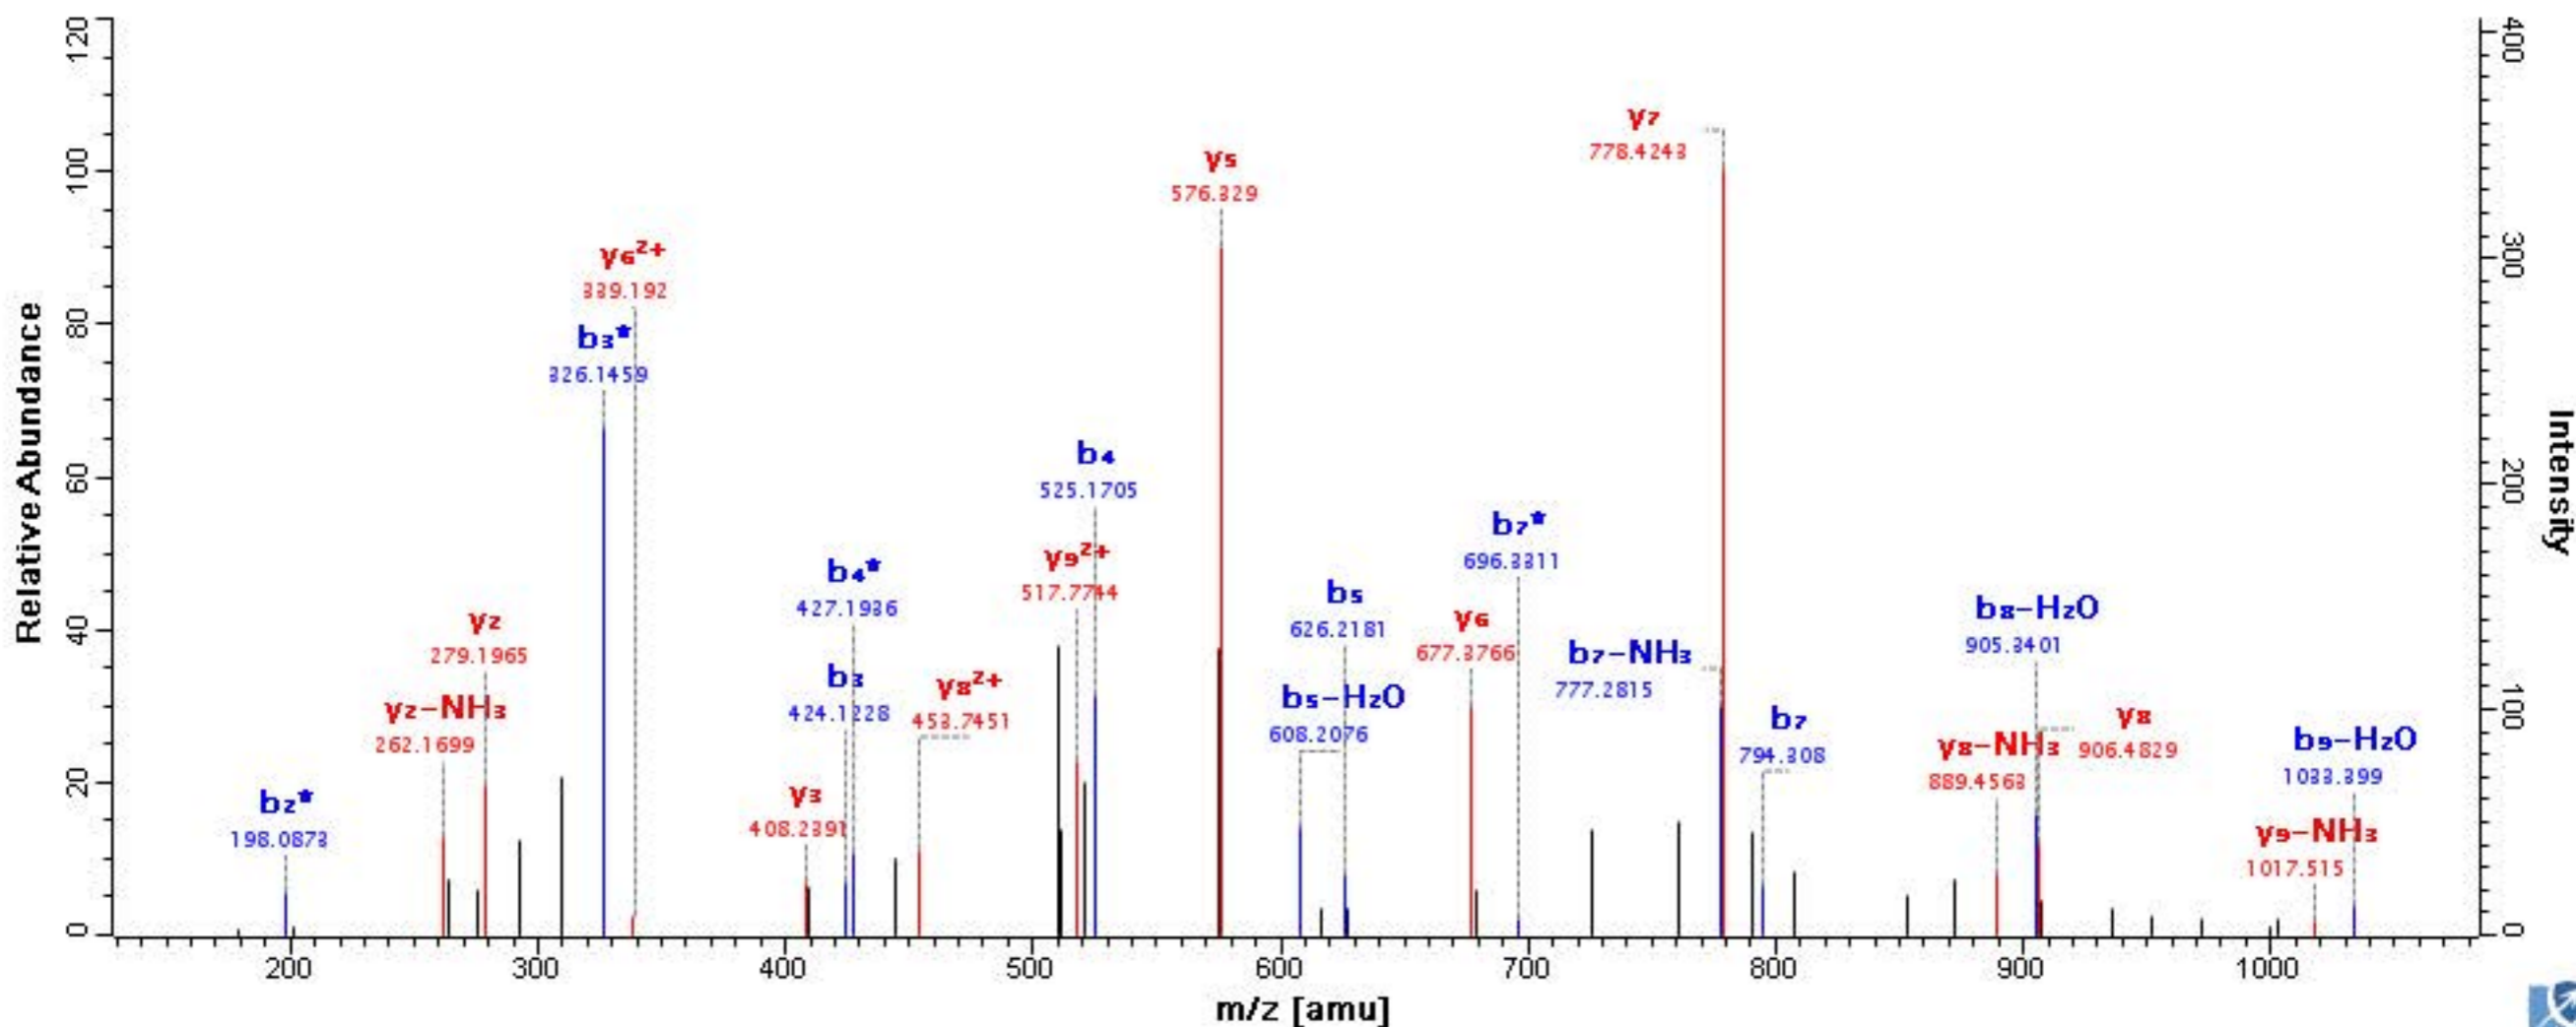

#### precursor information

|                   |                     |
|-------------------|---------------------|
| Mass:             | 1196.50655          |
| m/z:              | System.Collections. |
| Charge:           | System.Collections. |
| Retentiontime:    | System.Collections. |
| Score:            | 131.8261            |
| Mass Error [ppm]: | -0.75078            |
| PEP:              | 1.0253E-05          |
| Precursor Type:   | MULTI               |

#### general information

|                       |          |
|-----------------------|----------|
| Annotation:           | 8 of 10  |
| AminoAcids Coverage:  | 80 %     |
| Intensity Coverage:   | 65 %     |
| Protein Localisation: | 2 ... 11 |

| b ion      |              |    |     |   | y ion        |            | y <sup>2+</sup> ion |            |
|------------|--------------|----|-----|---|--------------|------------|---------------------|------------|
| Δ dalton   | mass         |    | seq |   | Δ dalton     | mass       | Δ dalton            | mass       |
|            | 168.00563528 | 1  | S   | 9 |              |            |                     |            |
|            | 296.0642128  | 2  | Q   | 8 | 1034.5414714 |            | 517.77437392        | -0.2890834 |
| +0.1915407 | 424.12279031 | 3  | Q   | 7 | 906.48289386 | -0.0564412 | 453.74508516        | +0.1524978 |
| +0.2156396 | 525.17046878 | 4  | T   | 6 | 778.42431635 | +0.0578614 | 778.42431635        |            |
| +0.0812912 | 626.21814726 | 5  | T   | 5 | 677.37663788 | +0.048533  | 339.19195717        | -0.4479997 |
|            | 723.27091111 | 6  | P   | 4 | 576.3289594  | +0.0644122 | 576.3289594         |            |
| +0.2513623 | 794.3080249  | 7  | A   | 3 | 479.27619555 |            | 479.27619555        |            |
|            | 923.35061799 | 8  | E   | 2 | 408.23908176 | +0.1202322 | 408.23908176        |            |
|            | 1051.4091955 | 9  | Q   | 1 | 279.19648867 | +0.0975787 | 279.19648867        |            |
|            |              | 10 | K   | 0 | 151.13791115 |            | 151.13791115        |            |

Source: 20120314\_VR\_TripleSILAC\_pT1L1T2\_F18  
 Scannumber: 4338  
 Protein: BSU25020; sodA; yqgD  
 Peptide Score: 93.84  
 Method: ITMS; CID; 3

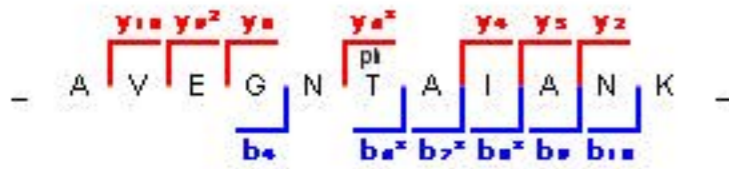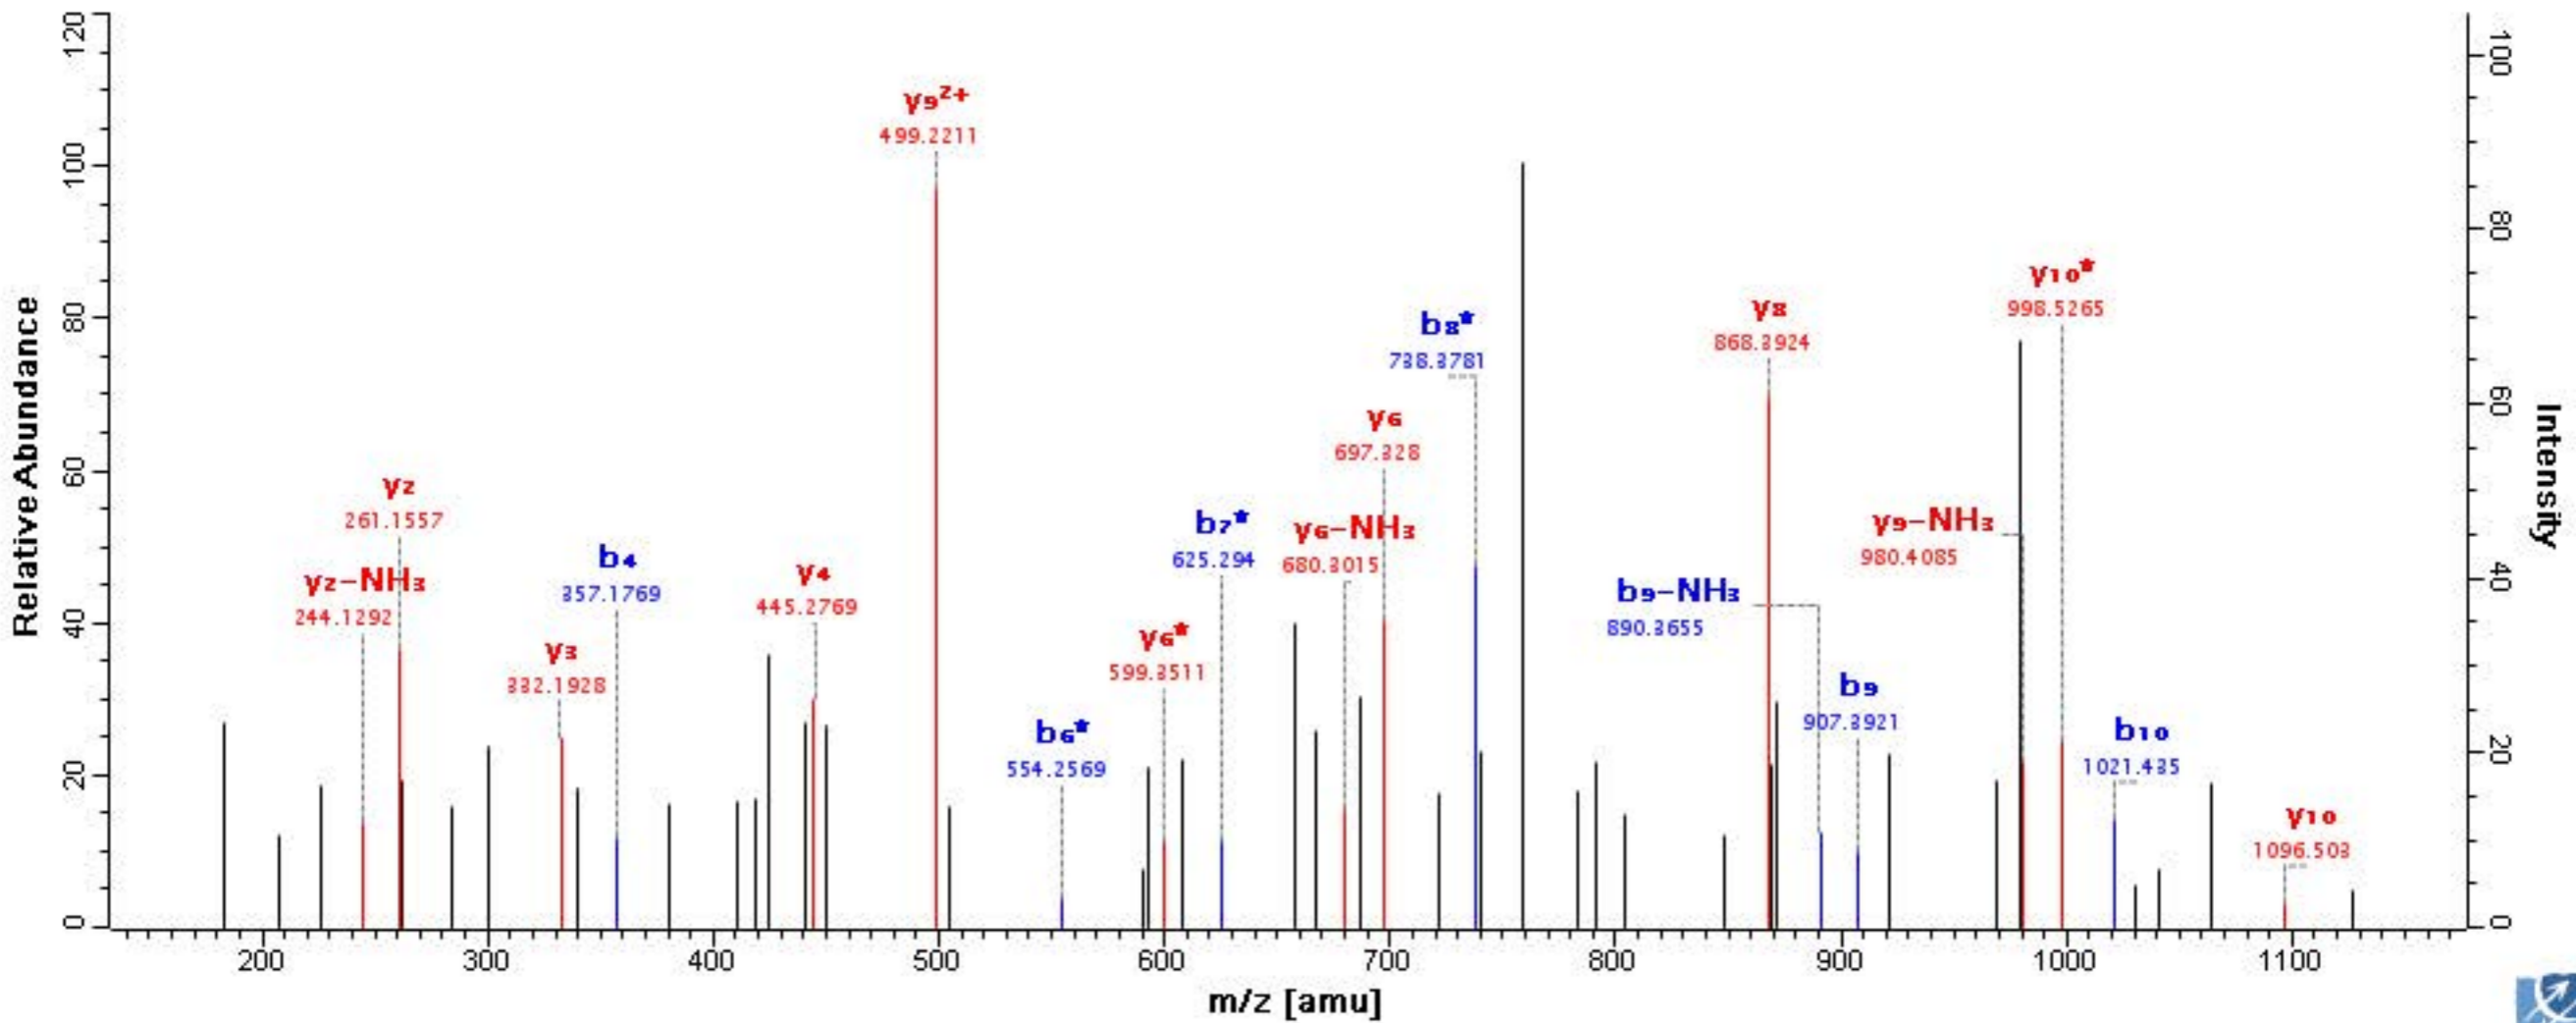

#### precursor information

|                   |                     |
|-------------------|---------------------|
| Mass:             | 1166.5343           |
| m/z:              | System.Collections. |
| Charge:           | System.Collections. |
| Retentiontime:    | System.Collections. |
| Score:            | 93.83924            |
| Mass Error [ppm]: | 0.88744             |
| PEP:              | 0.001563            |
| Precursor Type:   | MULTI               |

#### general information

|                       |           |
|-----------------------|-----------|
| Annotation:           | 8 of 11   |
| AminoAcids Coverag    | 73 %      |
| Intensity Coverage:   | 36 %      |
| Protein Localisation: | 42 ... 52 |

| b ion      |              |    |     |    | γ ion        |            | γ <sup>2+</sup> ion |            |
|------------|--------------|----|-----|----|--------------|------------|---------------------|------------|
| Δ dalton   | mass         |    | seq |    | Δ dalton     | mass       | Δ dalton            | mass       |
|            | 72.044390254 | 1  | A   | 10 |              |            |                     |            |
|            | 171.11280417 | 2  | V   | 9  | 1096.5034302 | -0.0969361 | 1096.5034302        |            |
|            | 300.15539727 | 3  | E   | 8  | 997.43501632 |            | 499.22114639        | +0.0401451 |
| -0.194256  | 357.17686099 | 4  | G   | 7  | 868.39242323 | +0.1076378 | 868.39242323        |            |
|            | 471.21978844 | 5  | N   | 6  | 811.3709595  |            | 811.3709595         |            |
|            | 652.23379732 | 6  | T   | 5  | 697.32803206 | -0.1106859 | 697.32803206        |            |
|            | 723.27091111 | 7  | A   | 4  | 516.31402317 |            | 516.31402317        |            |
|            | 836.35497509 | 8  | I   | 3  | 445.27690939 | -0.3929372 | 445.27690939        |            |
| -0.0859365 | 907.39208888 | 9  | A   | 2  | 332.19284541 | +0.20724   | 332.19284541        |            |
| -0.099323  | 1021.4350163 | 10 | N   | 1  | 261.15573162 | -0.0046086 | 261.15573162        |            |
|            |              | 11 | K   | 0  | 147.11280417 |            | 147.11280417        |            |



Source: 20120314\_VR\_TripleSILAC\_pT1L1T2\_F18  
 Scannumber: 6077  
 Protein: BSU28290; ilvC  
 Peptide Score: 159.4  
 Method: ITMS; CID; 3

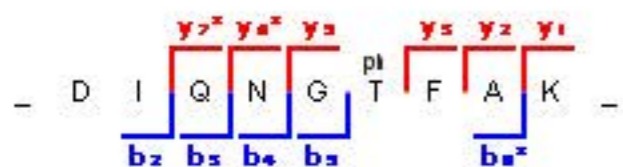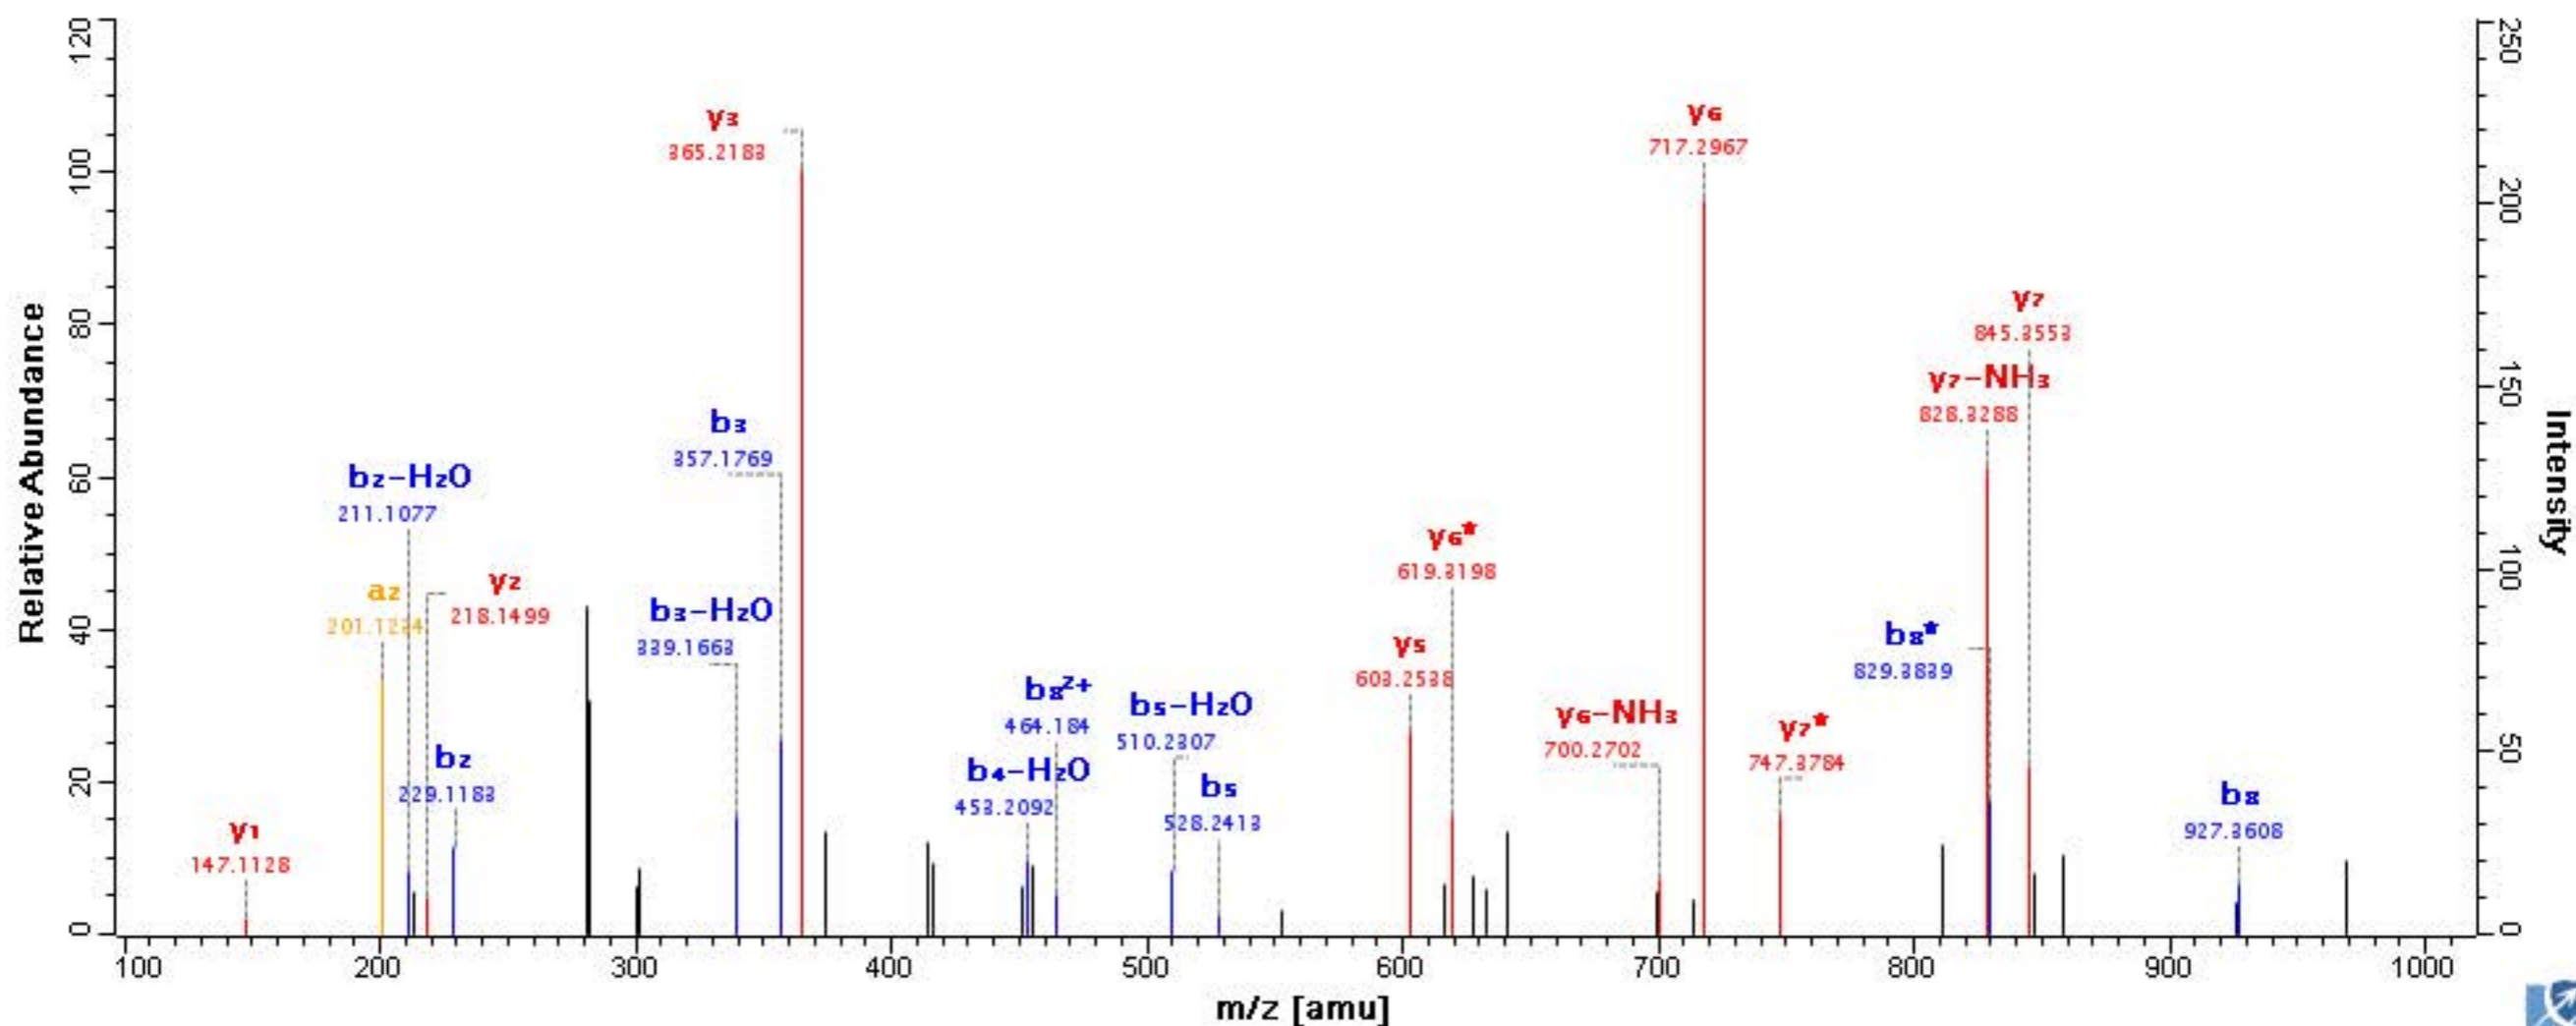

#### precursor information

|                       |                     |
|-----------------------|---------------------|
| Mass:                 | 1072.459            |
| m/z:                  | System.Collections. |
| Charge:               | System.Collections. |
| Retentiontime:        | System.Collections. |
| Score:                | 159.4039            |
| Mass Error [ppm]:     | -0.034267           |
| PEP:                  | 2.1185E-10          |
| g Precursor Type:     | MULTI               |
| Annotation:           | 7 of 9              |
| AminoAcids Coverag    | 78 %                |
| Intensity Coverage:   | 68 %                |
| Protein Localisation: | 280 ... 288         |

| a ion     |          | b <sup>2+</sup> ion |          | b ion     |          |   |     | y ion    |                    |
|-----------|----------|---------------------|----------|-----------|----------|---|-----|----------|--------------------|
| Δ dalton  | mass     | Δ dalton            | mass     | Δ dalton  | mass     |   | seq | Δ dalton | mass               |
|           | 88.0393  |                     | 116.0342 |           | 116.0342 | 1 | D   | 8        |                    |
| -0.022676 | 201.1234 |                     | 229.1183 | -0.153653 | 229.1183 | 2 | I   | 7        | 958.4394           |
|           | 329.1819 |                     | 357.1769 | -0.076458 | 357.1769 | 3 | Q   | 6        | 845.3553 +0.068519 |
|           | 443.2249 |                     | 471.2198 |           | 471.2198 | 4 | N   | 5        | 717.2967 +0.105795 |
|           | 500.2463 |                     | 528.2413 | +0.155904 | 528.2413 | 5 | G   | 4        | 603.2538 -0.158651 |
|           | 681.2603 |                     | 709.2553 |           | 709.2553 | 6 | T   | 3        | 546.2323           |
|           | 828.3288 |                     | 856.3237 |           | 856.3237 | 7 | F   | 2        | 365.2183 +0.218436 |
|           | 899.3659 | +0.175342           | 464.184  | -0.292429 | 927.3608 | 8 | A   | 1        | 218.1499 +0.072174 |
|           |          |                     |          |           |          | 9 | K   | 0        | 147.1128 +0.12978  |

Source: 20120314\_VR\_TripleSILAC\_pT1L1T2\_F18  
 Scannumber: 9124  
 Protein: BSU21770; ilvA  
 Peptide Score: 173.44  
 Method: ITMS; CID; 3

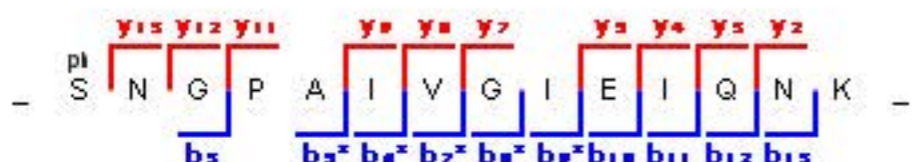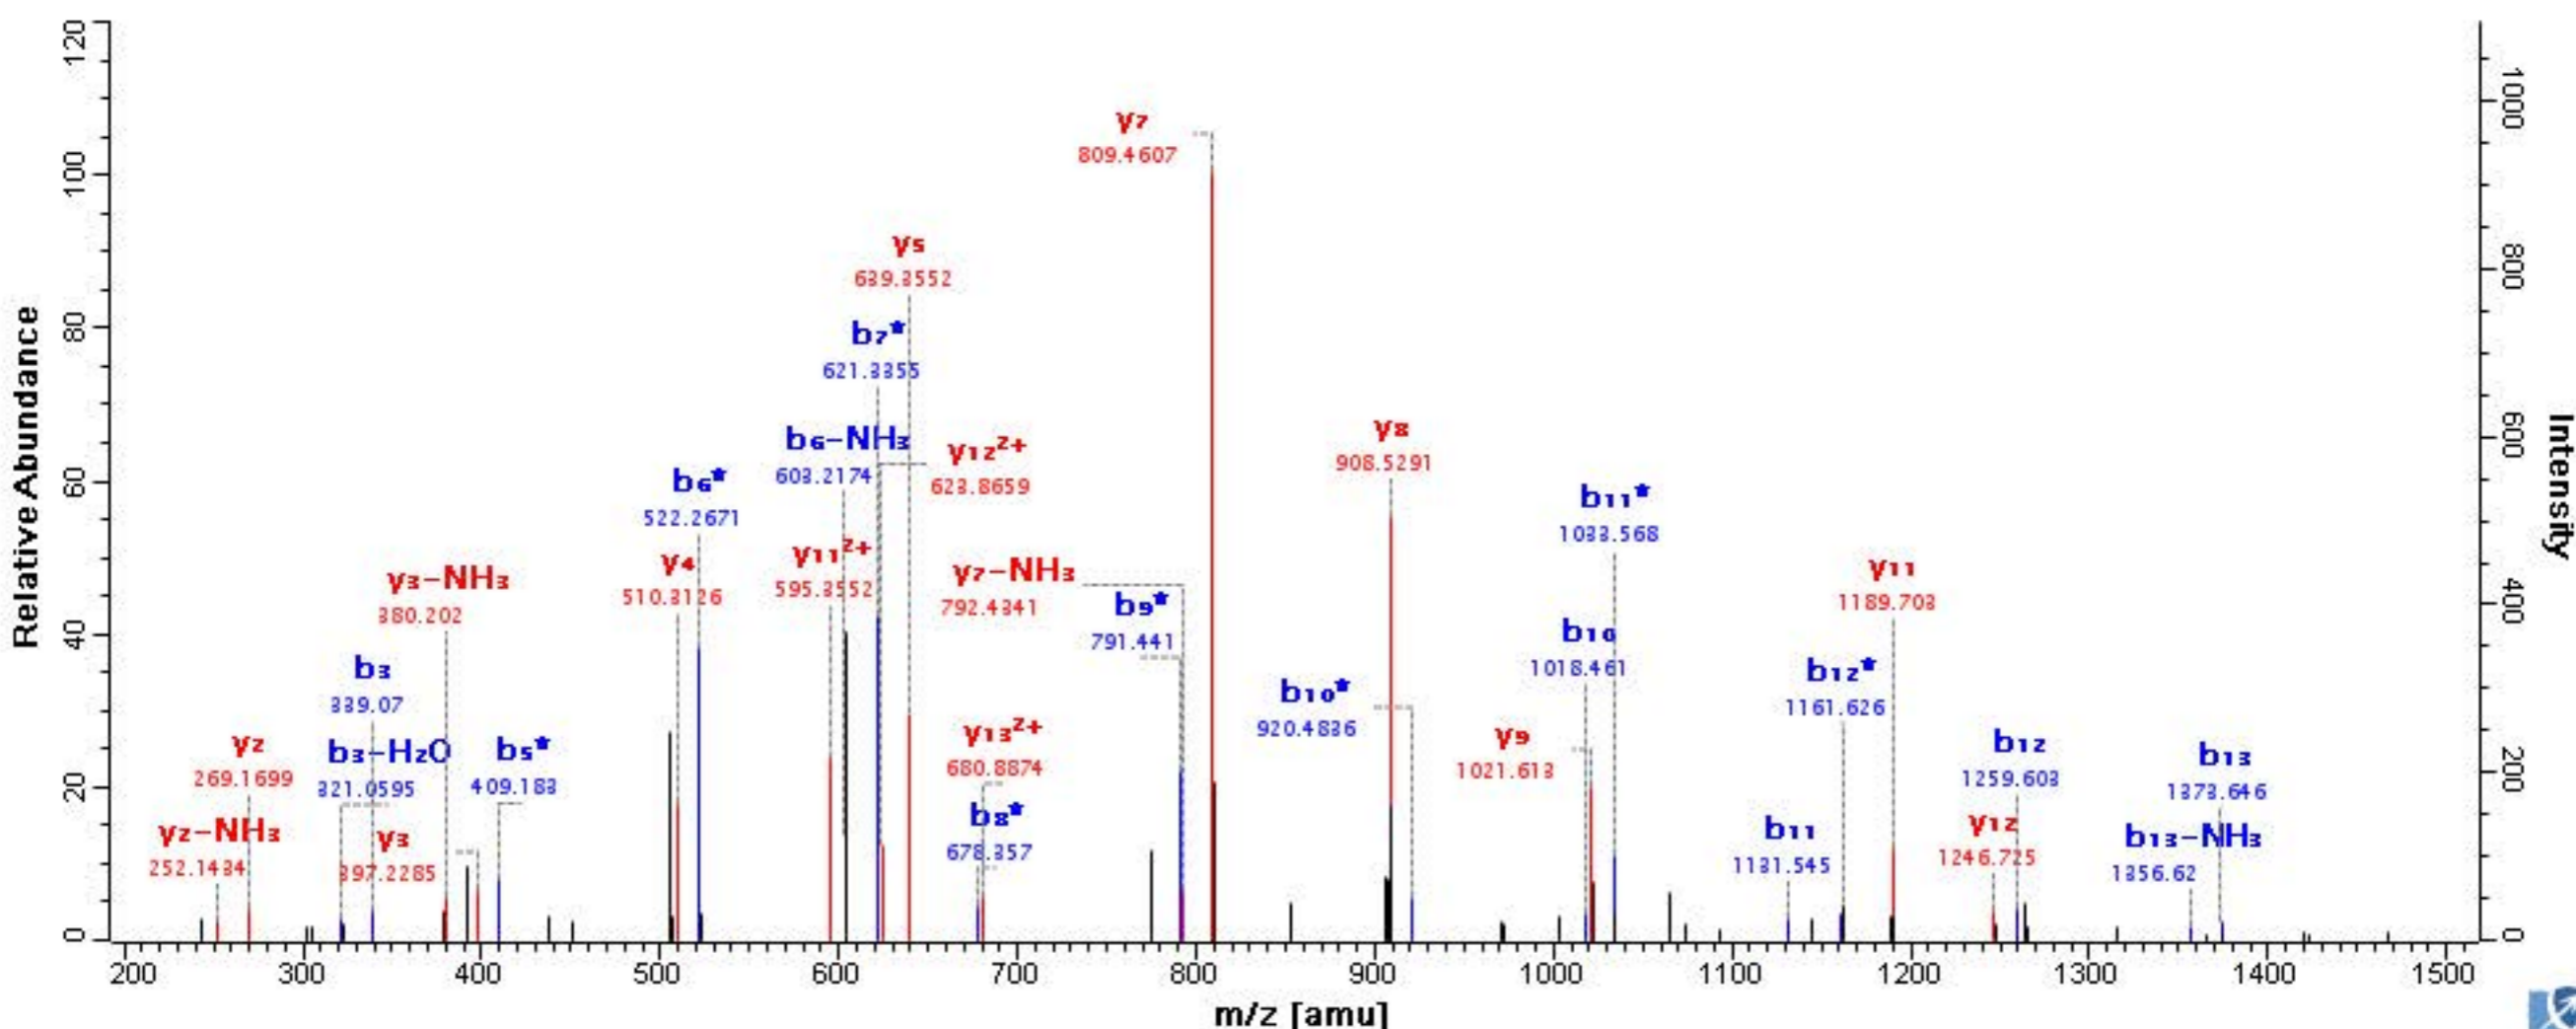

#### precursor information

|                   |                     |
|-------------------|---------------------|
| Mass:             | 1518.74377          |
| m/z:              | System.Collections. |
| Charge:           | System.Collections. |
| Retentiontime:    | System.Collections. |
| Score:            | 173.4413            |
| Mass Error [ppm]: | -0.36251            |
| PEP:              | 4.0347E-25          |
| Precursor Type:   | MULTI               |

#### general information

|                       |             |
|-----------------------|-------------|
| Annotation:           | 12 of 14    |
| AminoAcids Coverage:  | 86 %        |
| Intensity Coverage:   | 66 %        |
| Protein Localisation: | 378 ... 391 |

| b ion      |              |    |     |    | y ion        |            | y <sup>2+</sup> ion |            |
|------------|--------------|----|-----|----|--------------|------------|---------------------|------------|
| Δ dalton   | mass         |    | seq |    | Δ dalton     | mass       | Δ dalton            | mass       |
|            | 168.00563528 | 1  | S   | 13 |              |            |                     |            |
|            | 282.04856273 | 2  | N   | 12 | 1360.7674394 |            | 680.88735795        | -0.0606978 |
| +0.0414237 | 339.07002646 | 3  | G   | 11 | 1246.724512  | +0.1269284 | 623.86589422        | +0.3413201 |
|            | 436.12279031 | 4  | P   | 10 | 1189.7030483 | -0.0048061 | 595.35516236        | +0.2661755 |
|            | 507.1599041  | 5  | A   | 9  | 1092.6502844 |            | 1092.6502844        |            |
|            | 620.24396808 | 6  | I   | 8  | 1021.6131706 | -0.1443596 | 1021.6131706        |            |
|            | 719.31238199 | 7  | V   | 7  | 908.52910664 | +0.013618  | 908.52910664        |            |
|            | 776.33384572 | 8  | G   | 6  | 809.46069272 | -0.0029901 | 809.46069272        |            |
|            | 889.4179097  | 9  | I   | 5  | 752.439229   |            | 752.439229          |            |
| -0.0266649 | 1018.4605028 | 10 | E   | 4  | 639.35516502 | +0.1514878 | 639.35516502        |            |
| -0.100475  | 1131.5445668 | 11 | I   | 3  | 510.31257192 | -0.0675768 | 510.31257192        |            |
| +0.3054251 | 1259.6031443 | 12 | Q   | 2  | 397.22850794 | +0.0413285 | 397.22850794        |            |
| +0.0371558 | 1373.6460717 | 13 | N   | 1  | 269.16993043 | +0.0746374 | 269.16993043        |            |
|            |              | 14 | K   | 0  | 155.12700298 |            | 155.12700298        |            |

Source: 20120314\_VR\_TripleSILAC\_pT1L1T2\_F21  
 Scannumber: 3087  
 Protein: BSU36900; glyA; glyC; ipc-34 d  
 Peptide Score: 151.27  
 Method: ITMS; CID; 3

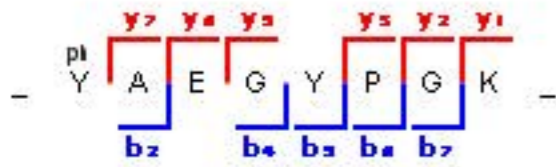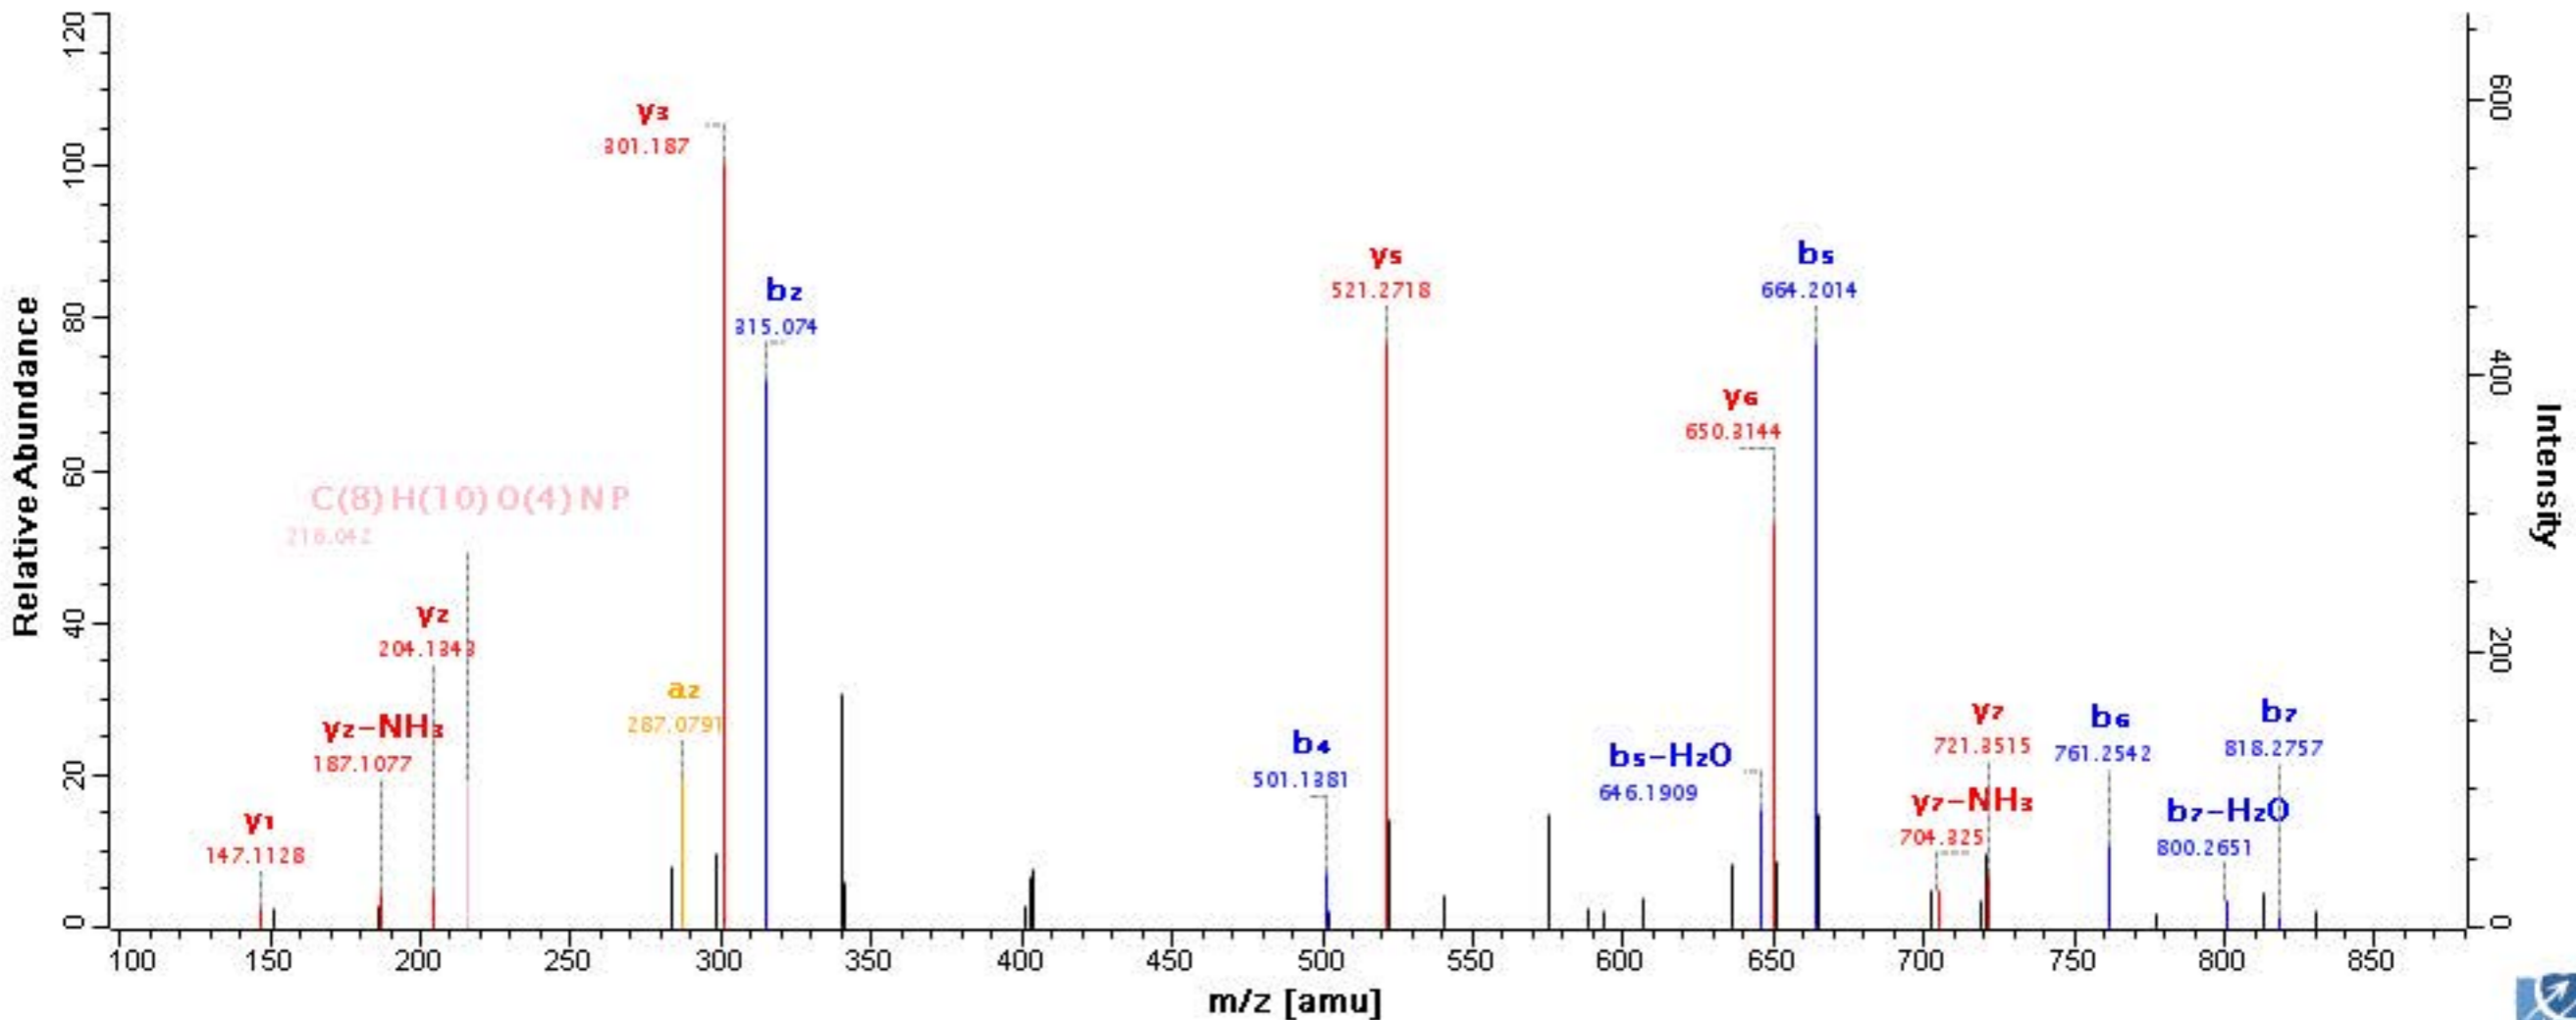

precursor information

|                       |                     |
|-----------------------|---------------------|
| Mass:                 | 963.37422           |
| m/z:                  | System.Collections. |
| Charge:               | System.Collections. |
| Retentiontime:        | System.Collections. |
| Score:                | 151.2687            |
| Mass Error [ppm]:     | 0.31991             |
| g PEP:                | 1.3404E-08          |
| Annotation:           | 7 of 8              |
| AminoAcids Coverag    | 88 %                |
| Intensity Coverage:   | 73 %                |
| Protein Localisation: | 51 ... 58           |

| a ion      |              | b ion      |              |     | y ion    |      |                         |
|------------|--------------|------------|--------------|-----|----------|------|-------------------------|
| Δ dalton   | mass         | Δ dalton   | mass         | seq | Δ dalton | mass |                         |
|            | 216.04202079 |            | 244.03693541 | 1   | Y        | 7    |                         |
| +0.0427831 | 287.07913458 | +0.0183885 | 315.0740492  | 2   | A        | 6    | 721.35153089 +0.0376903 |
|            | 416.12172768 |            | 444.1166423  | 3   | E        | 5    | 650.3144171 +0.0348871  |
|            | 473.1431914  | +0.0918134 | 501.13810602 | 4   | G        | 4    | 521.27182401 -0.0037576 |
|            | 636.20651994 | +0.0370908 | 664.20143456 | 5   | Y        | 3    | 464.25036028            |
|            | 733.25928379 | +0.1136605 | 761.25419841 | 6   | P        | 2    | 301.18703175 -0.0253496 |
|            | 790.28074751 | -0.0088164 | 818.27566213 | 7   | G        | 1    | 204.13426789 -0.0035611 |
|            |              |            |              | 8   | K        | 0    | 147.11280417 +0.1506846 |

Source: 20120325\_VR\_Bsu\_TripleSILAC\_pL2ESLrep\_F03  
 Scannumber: 11810  
 Protein: BSU34390; estB; pnbA  
 Peptide Score: 94.5  
 Method: ITMS; CID; 3

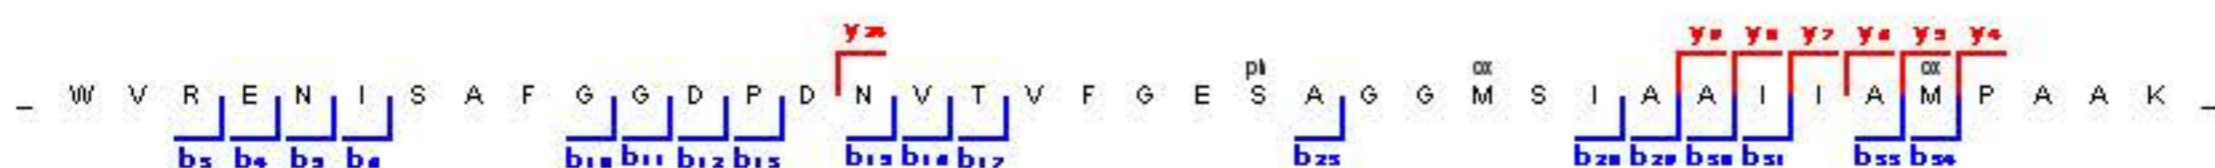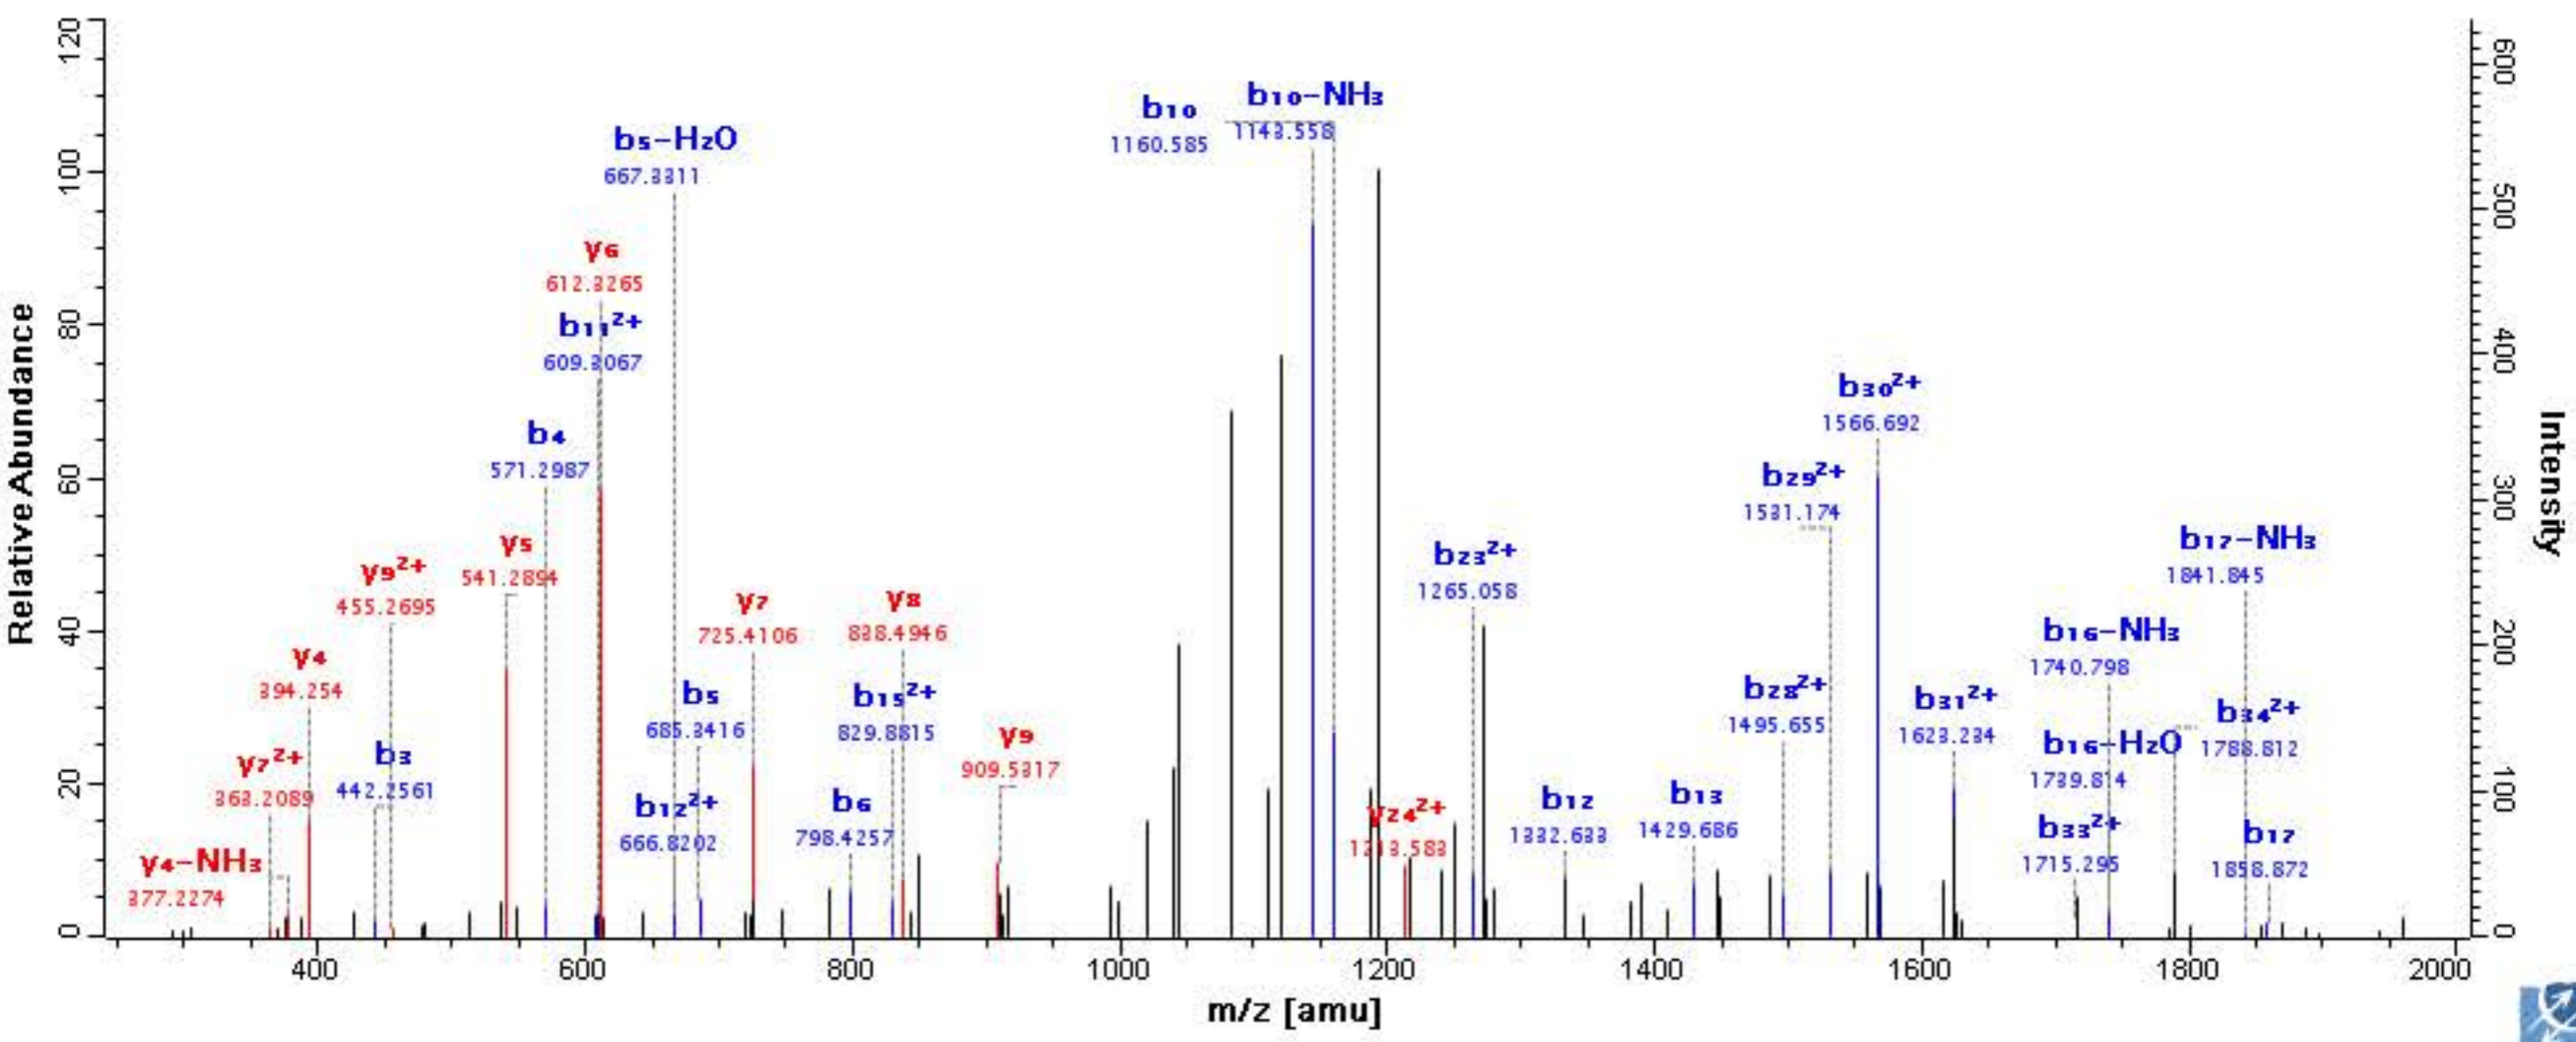

**precursor information**

|                   |                     |
|-------------------|---------------------|
| Mass:             | 3968.85527          |
| m/z:              | System.Collections. |
| Charge:           | System.Collections. |
| Retentiontime:    | System.Collections. |
| Score:            | 94.49538            |
| Mass Error [ppm]: | -0.42109            |
| PEP:              | 9.3982E-26          |
| Precursor Type:   | ISO                 |

| b <sup>2+</sup> ion |          | b ion     |          | seq |   | γ ion    |          | γ <sup>2+</sup> ion |                    |
|---------------------|----------|-----------|----------|-----|---|----------|----------|---------------------|--------------------|
| Δ dalton            | mass     | Δ dalton  | mass     |     |   | Δ dalton | mass     | Δ dalton            | mass               |
|                     | 187.0866 |           | 187.0866 | 1   | W | 37       |          |                     |                    |
|                     | 286.155  |           | 286.155  | 2   | V | 36       | 3783.785 |                     | 3783.785           |
|                     | 442.2561 | +0.09087  | 442.2561 | 3   | R | 35       | 3684.716 |                     | 3684.716           |
|                     | 571.2987 | +0.030699 | 571.2987 | 4   | E | 34       | 3528.615 |                     | 3528.615           |
|                     | 685.3416 | +0.07255  | 685.3416 | 5   | N | 33       | 3399.573 |                     | 3399.573           |
|                     | 798.4257 | -0.007608 | 798.4257 | 6   | I | 32       | 3285.53  |                     | 3285.53            |
|                     | 885.4577 |           | 885.4577 | 7   | S | 31       | 3172.446 |                     | 3172.446           |
|                     | 956.4948 |           | 956.4948 | 8   | A | 30       | 3085.414 |                     | 3085.414           |
|                     | 1103.563 |           | 1103.563 | 9   | F | 29       | 3014.377 |                     | 3014.377           |
|                     | 1160.585 | -0.022951 | 1160.585 | 10  | G | 28       | 2867.308 |                     | 2867.308           |
| +0.051181           | 609.3067 |           | 1217.606 | 11  | G | 27       | 2810.287 |                     | 2810.287           |
| -0.008617           | 666.8202 | +0.188774 | 1332.633 | 12  | D | 26       | 2753.265 |                     | 2753.265           |
|                     | 1429.686 | +0.456078 | 1429.686 | 13  | P | 25       | 2638.238 |                     | 2638.238           |
|                     | 1544.713 |           | 1544.713 | 14  | D | 24       | 2541.186 |                     | 2541.186           |
| +0.47334            | 829.8815 |           | 1658.756 | 15  | N | 23       | 2426.159 | 1213.583            | +0.207071          |
|                     | 1757.824 |           | 1757.824 | 16  | V | 22       | 2312.116 |                     | 2312.116           |
|                     | 1858.872 | -0.406886 | 1858.872 | 17  | T | 21       | 2213.047 |                     | 2213.047           |
|                     | 1957.94  |           | 1957.94  | 18  | V | 20       | 2112     |                     | 2112               |
|                     | 2105.009 |           | 2105.009 | 19  | F | 19       | 2012.931 |                     | 2012.931           |
|                     | 2162.03  |           | 2162.03  | 20  | G | 18       | 1865.863 |                     | 1865.863           |
|                     | 2291.073 |           | 2291.073 | 21  | E | 17       | 1808.841 |                     | 1808.841           |
|                     | 2458.071 |           | 2458.071 | 22  | S | 16       | 1679.799 |                     | 1679.799           |
| -0.468387           | 1265.058 |           | 2529.108 | 23  | A | 15       | 1512.8   |                     | 1512.8             |
|                     | 2586.13  |           | 2586.13  | 24  | G | 14       | 1441.763 |                     | 1441.763           |
|                     | 2643.151 |           | 2643.151 | 25  | G | 13       | 1384.742 |                     | 1384.742           |
|                     | 2790.187 |           | 2790.187 | 26  | M | 12       | 1327.72  |                     | 1327.72            |
|                     | 2877.219 |           | 2877.219 | 27  | S | 11       | 1180.685 |                     | 1180.685           |
| +0.323563           | 1495.655 |           | 2990.303 | 28  | I | 10       | 1093.653 |                     | 1093.653           |
| +0.495436           | 1531.174 |           | 3061.34  | 29  | A | 9        | 980.5689 |                     | 980.5689           |
| +0.305492           | 1566.692 |           | 3132.377 | 30  | A | 8        | 909.5317 | -0.158824           | 455.2695 +0.38512  |
| -0.037565           | 1623.234 |           | 3245.461 | 31  | I | 7        | 838.4946 | +0.057              | 838.4946           |
|                     | 3358.545 |           | 3358.545 | 32  | I | 6        | 725.4106 | -0.031787           | 363.2089 -0.044282 |
| +0.086783           | 1715.295 |           | 3429.582 | 33  | A | 5        | 612.3265 | -0.016693           | 612.3265           |
| -0.173105           | 1788.812 |           | 3576.617 | 34  | M | 4        | 541.2894 | -0.032741           | 541.2894           |
|                     | 3673.67  |           | 3673.67  | 35  | P | 3        | 394.254  | -0.073361           | 394.254            |
|                     | 3744.707 |           | 3744.707 | 36  | A | 2        | 297.2012 |                     | 297.2012           |
|                     | 3815.744 |           | 3815.744 | 37  | A | 1        | 226.1641 |                     | 226.1641           |
|                     |          |           |          | 38  | K | 0        | 155.127  |                     | 155.127            |

**general information**

|                       |             |
|-----------------------|-------------|
| Annotation:           | 20 of 38    |
| AminoAcids Coverag    | 53 %        |
| Intensity Coverage:   | 40 %        |
| Protein Localisation: | 168 ... 205 |

Source: 201 20325\_VR\_Bsu\_TripleSILAC\_pL2ESLSrep\_F03  
 Scannumber: 6692  
 Protein: BSU30320; leu5  
 Peptide Score: 105.39  
 Method: ITMS; CID; 3

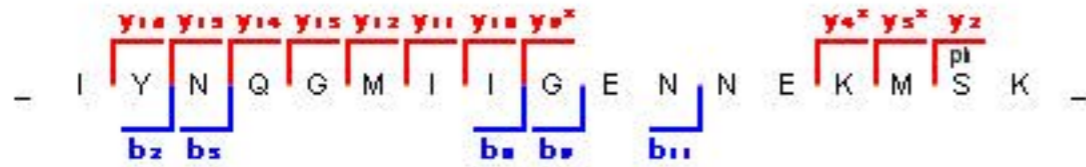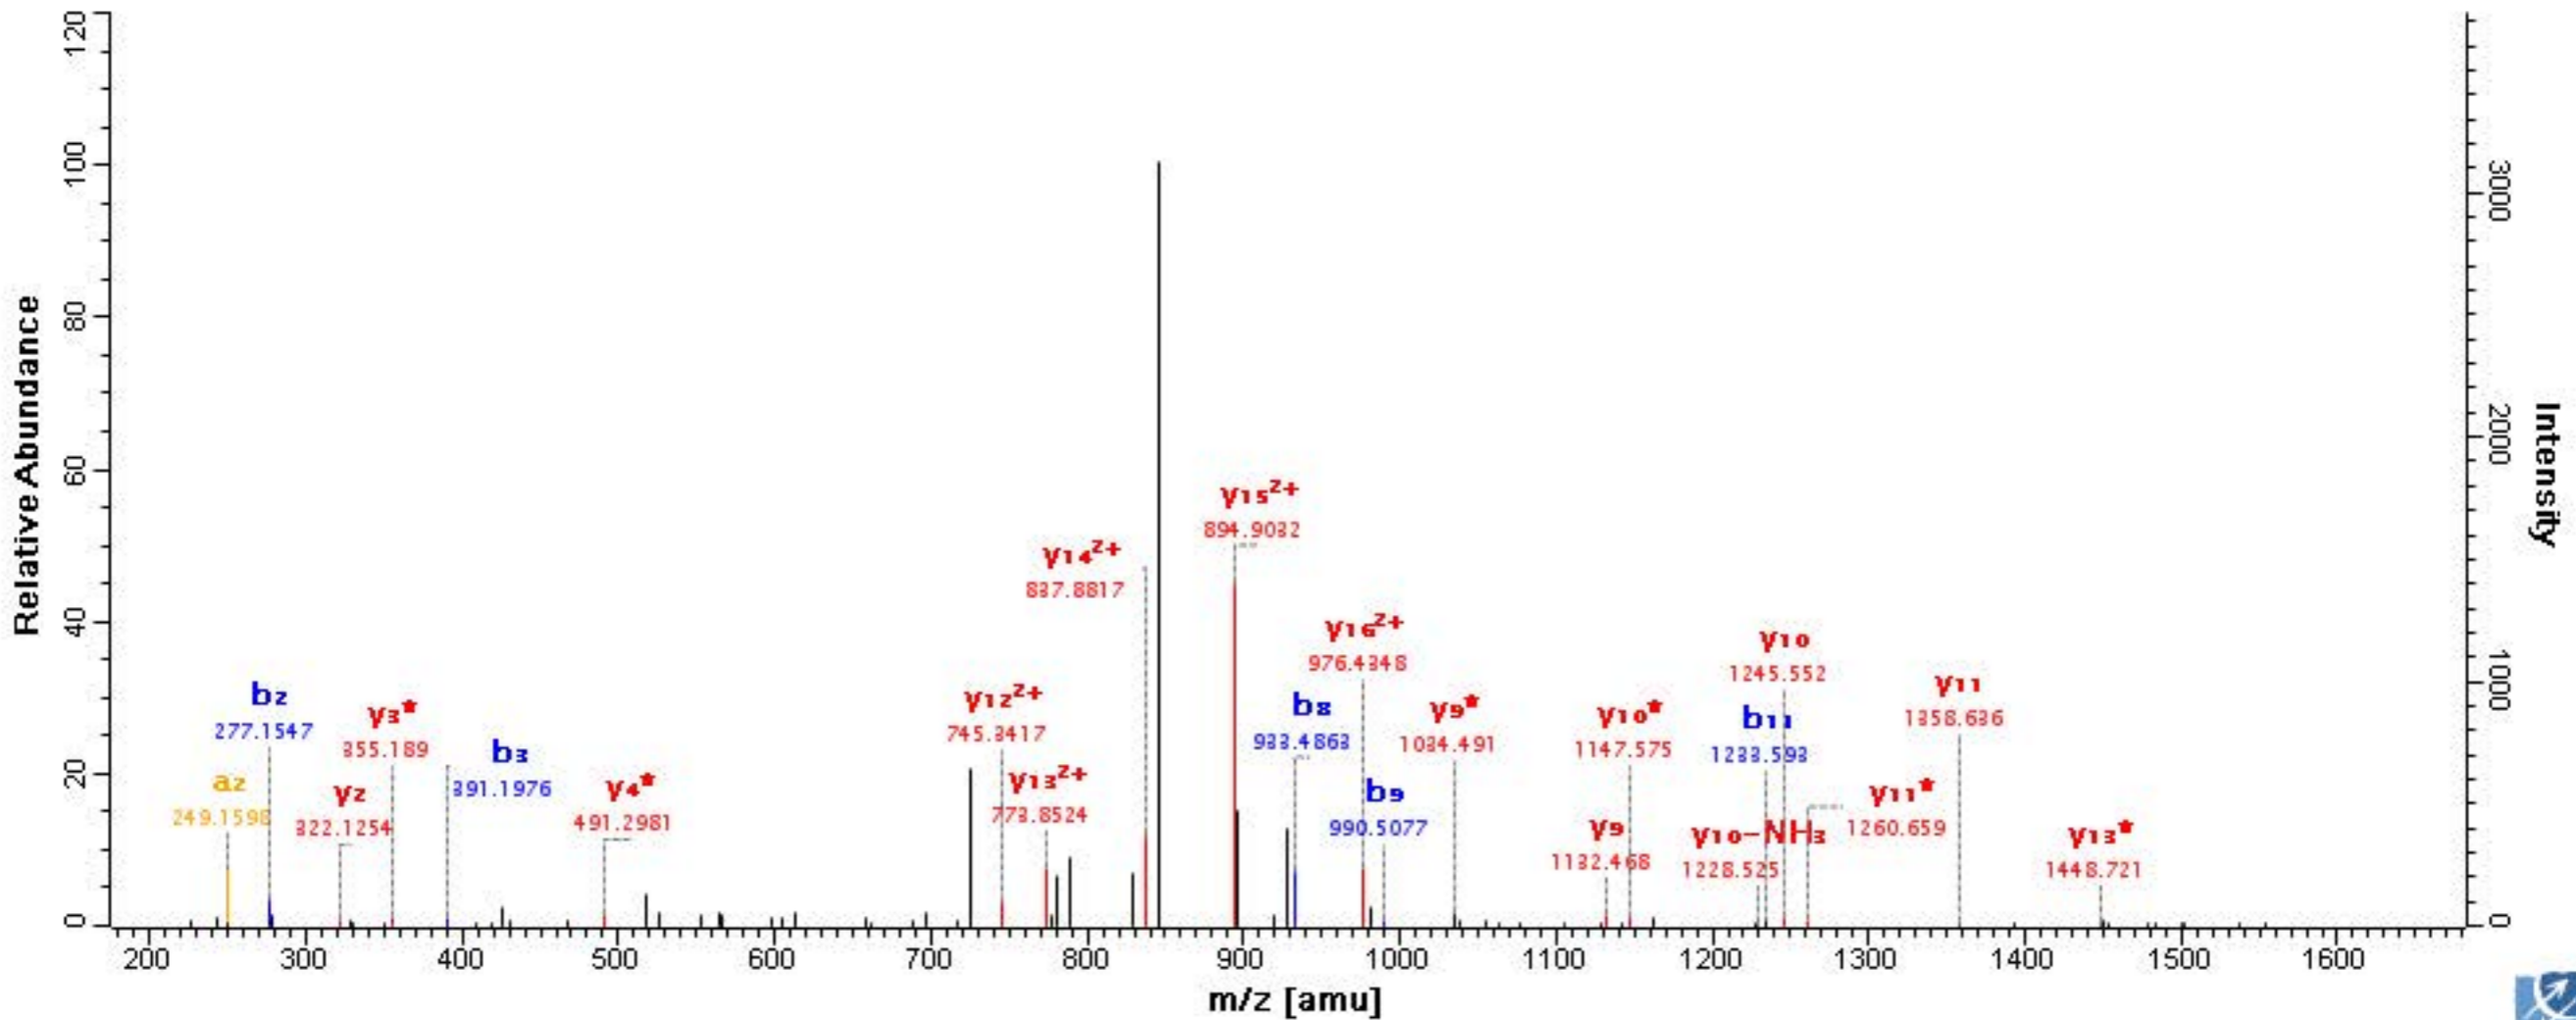

**precursor information**

|                   |                     |
|-------------------|---------------------|
| Mass:             | 2047.91142          |
| m/z:              | System.Collections. |
| Charge:           | System.Collections. |
| Retentiontime:    | System.Collections. |
| Score:            | 105.3914            |
| Mass Error [ppm]: | 0.29273             |
| PEP:              | 0.00012039          |
| Precursor Type:   | MULTI               |

| a ion     |          | b ion     |          | seq |   |    | y ion    |           | y <sup>2+</sup> ion |           |
|-----------|----------|-----------|----------|-----|---|----|----------|-----------|---------------------|-----------|
| Δ dalton  | mass     | Δ dalton  | mass     |     |   |    | Δ dalton | mass      | Δ dalton            | mass      |
|           | 86.09643 |           | 114.0913 | 1   | I | 16 |          |           |                     |           |
| -0.004893 | 249.1598 | +0.093103 | 277.1547 | 2   | Y | 15 | 1951.862 |           | 976.4348            | +0.232936 |
|           | 363.2027 | -0.006801 | 391.1976 | 3   | N | 14 | 1788.799 |           | 894.9032            | -0.054064 |
|           | 491.2613 |           | 519.2562 | 4   | Q | 13 | 1674.756 |           | 837.8817            | -0.430123 |
|           | 548.2827 |           | 576.2776 | 5   | G | 12 | 1546.698 |           | 773.8524            | +0.116927 |
|           | 679.3232 |           | 707.3181 | 6   | M | 11 | 1489.676 |           | 745.3417            | -0.000392 |
|           | 792.4073 |           | 820.4022 | 7   | I | 10 | 1358.636 | -0.118429 | 1358.636            |           |
|           | 905.4913 | -0.345869 | 933.4863 | 8   | I | 9  | 1245.552 | +0.202451 | 1245.552            |           |
|           | 962.5128 | -0.216149 | 990.5077 | 9   | G | 8  | 1132.468 | +0.053727 | 1132.468            |           |
|           | 1091.555 |           | 1119.55  | 10  | E | 7  | 1075.446 |           | 1075.446            |           |
|           | 1205.598 | +0.168728 | 1233.593 | 11  | N | 6  | 946.4035 |           | 946.4035            |           |
|           | 1319.641 |           | 1347.636 | 12  | N | 5  | 832.3605 |           | 832.3605            |           |
|           | 1448.684 |           | 1476.679 | 13  | E | 4  | 718.3176 |           | 718.3176            |           |
|           | 1584.793 |           | 1612.788 | 14  | K | 3  | 589.275  |           | 589.275             |           |
|           | 1715.833 |           | 1743.828 | 15  | M | 2  | 453.1658 |           | 453.1658            |           |
|           | 1882.832 |           | 1910.827 | 16  | S | 1  | 322.1254 | -0.136135 | 322.1254            |           |
|           |          |           |          | 17  | K | 0  | 155.127  |           | 155.127             |           |

**general information**

|                       |             |
|-----------------------|-------------|
| Annotation:           | 12 of 17    |
| AminoAcids Coverag    | 71 %        |
| Intensity Coverage:   | 32 %        |
| Protein Localisation: | 563 ... 579 |

Source: 20120325\_VR\_Bsu\_TripleSILAC\_pL2ESLRep\_F03  
 Scannumber: 8024  
 Protein: atpA: BSU36830  
 Peptide Score: 147.87  
 Method: ITMS; CID; 3

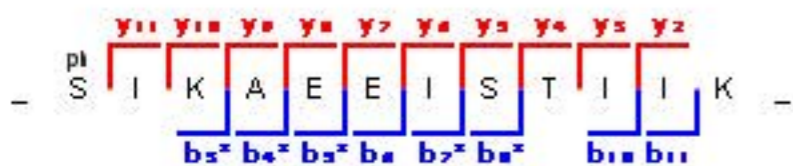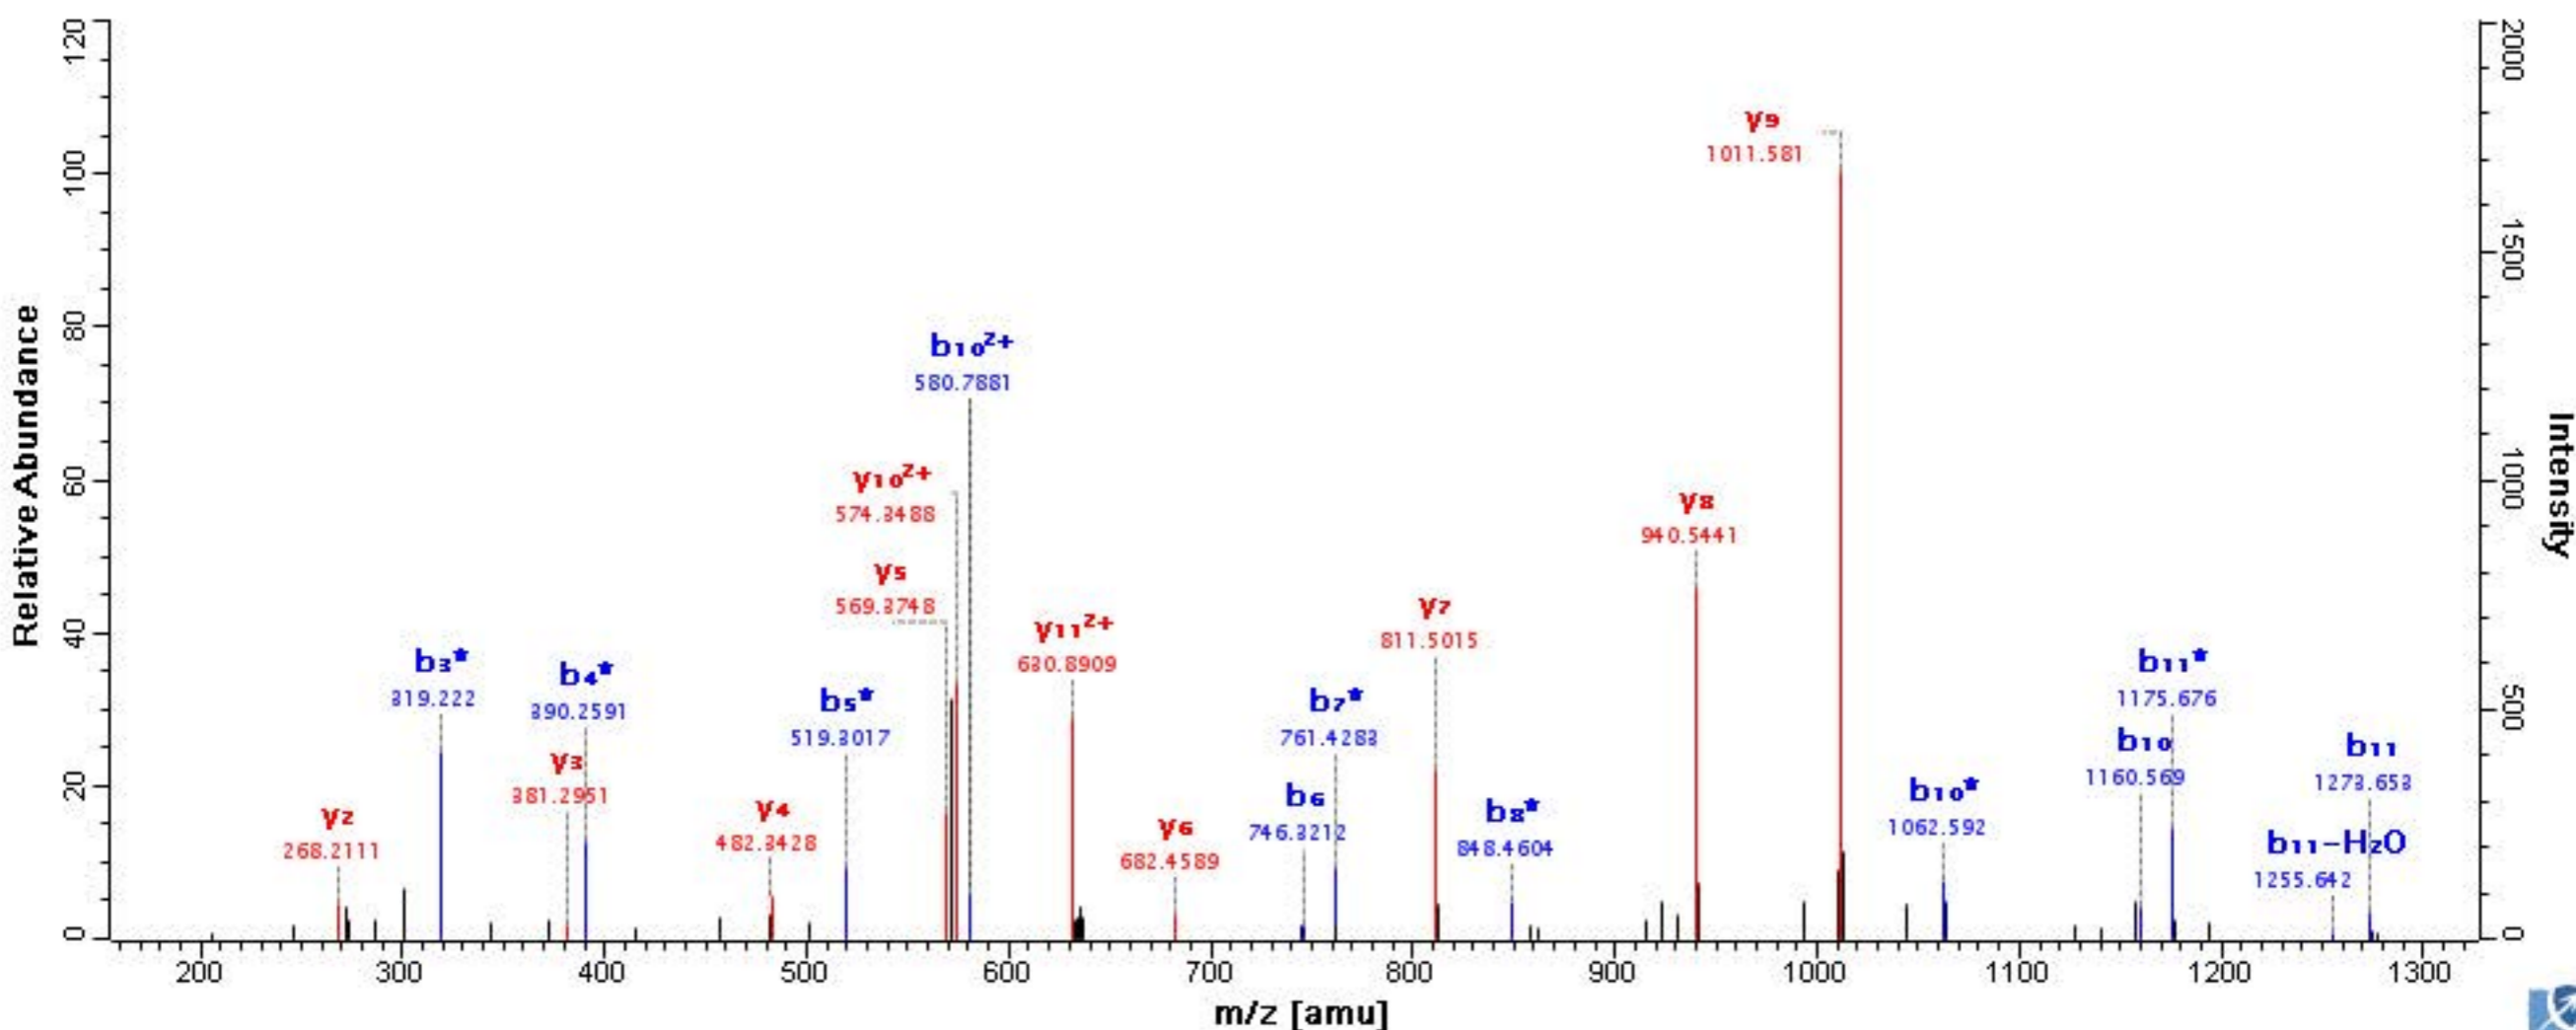

#### precursor information

|                   |                     |
|-------------------|---------------------|
| Mass:             | 1410.73634          |
| m/z:              | System.Collections. |
| Charge:           | System.Collections. |
| Retentiontime:    | System.Collections. |
| Score:            | 147.8661            |
| Mass Error [ppm]: | -0.54427            |
| PEP:              | 7.9429E-13          |
| Precursor Type:   | MULTI               |

#### general information

|                       |          |
|-----------------------|----------|
| Annotation:           | 10 of 12 |
| AminoAcids Coverag    | 83 %     |
| Intensity Coverage:   | 62 %     |
| Protein Localisation: | 2 ... 13 |

| b <sup>2+</sup> ion |          | b ion     |          |    | seq |    | γ ion    |           | γ <sup>2+</sup> ion |           |
|---------------------|----------|-----------|----------|----|-----|----|----------|-----------|---------------------|-----------|
| Δ dalton            | mass     | Δ dalton  | mass     |    |     |    | Δ dalton | mass      | Δ dalton            | mass      |
|                     | 168.0056 |           | 168.0056 | 1  | S   | 11 |          |           |                     |           |
|                     | 281.0897 |           | 281.0897 | 2  | I   | 10 | 1260.774 |           | 630.8909            | +0.015398 |
|                     | 417.1989 |           | 417.1989 | 3  | K   | 9  | 1147.69  |           | 574.3488            | +0.028438 |
|                     | 488.236  |           | 488.236  | 4  | A   | 8  | 1011.581 | -0.030848 | 1011.581            |           |
|                     | 617.2786 |           | 617.2786 | 5  | E   | 7  | 940.5441 | -0.053671 | 940.5441            |           |
|                     | 746.3212 | +0.195868 | 746.3212 | 6  | E   | 6  | 811.5015 | -0.041351 | 811.5015            |           |
|                     | 859.4052 |           | 859.4052 | 7  | I   | 5  | 682.4589 | +0.267722 | 682.4589            |           |
|                     | 946.4373 |           | 946.4373 | 8  | S   | 4  | 569.3748 | +0.150797 | 569.3748            |           |
|                     | 1047.485 |           | 1047.485 | 9  | T   | 3  | 482.3428 | +0.161341 | 482.3428            |           |
| +0.194713           | 580.7881 | -0.266017 | 1160.569 | 10 | I   | 2  | 381.2951 | +0.03037  | 381.2951            |           |
|                     | 1273.653 | +0.066056 | 1273.653 | 11 | I   | 1  | 268.2111 | +0.073357 | 268.2111            |           |
|                     |          |           |          | 12 | K   | 0  | 155.127  |           | 155.127             |           |

Source: 20120325\_VR\_Bsu\_TripleSILAC\_pL2ESLRep\_F04  
 Scannumber: 6112  
 Protein: aroA; BSU29750  
 Peptide Score: 156.58  
 Method: ITMS; CID; 3

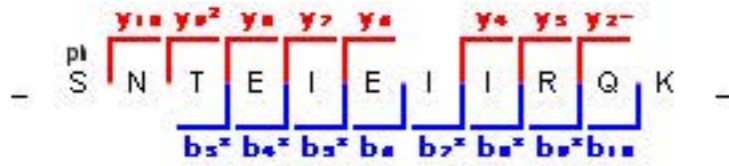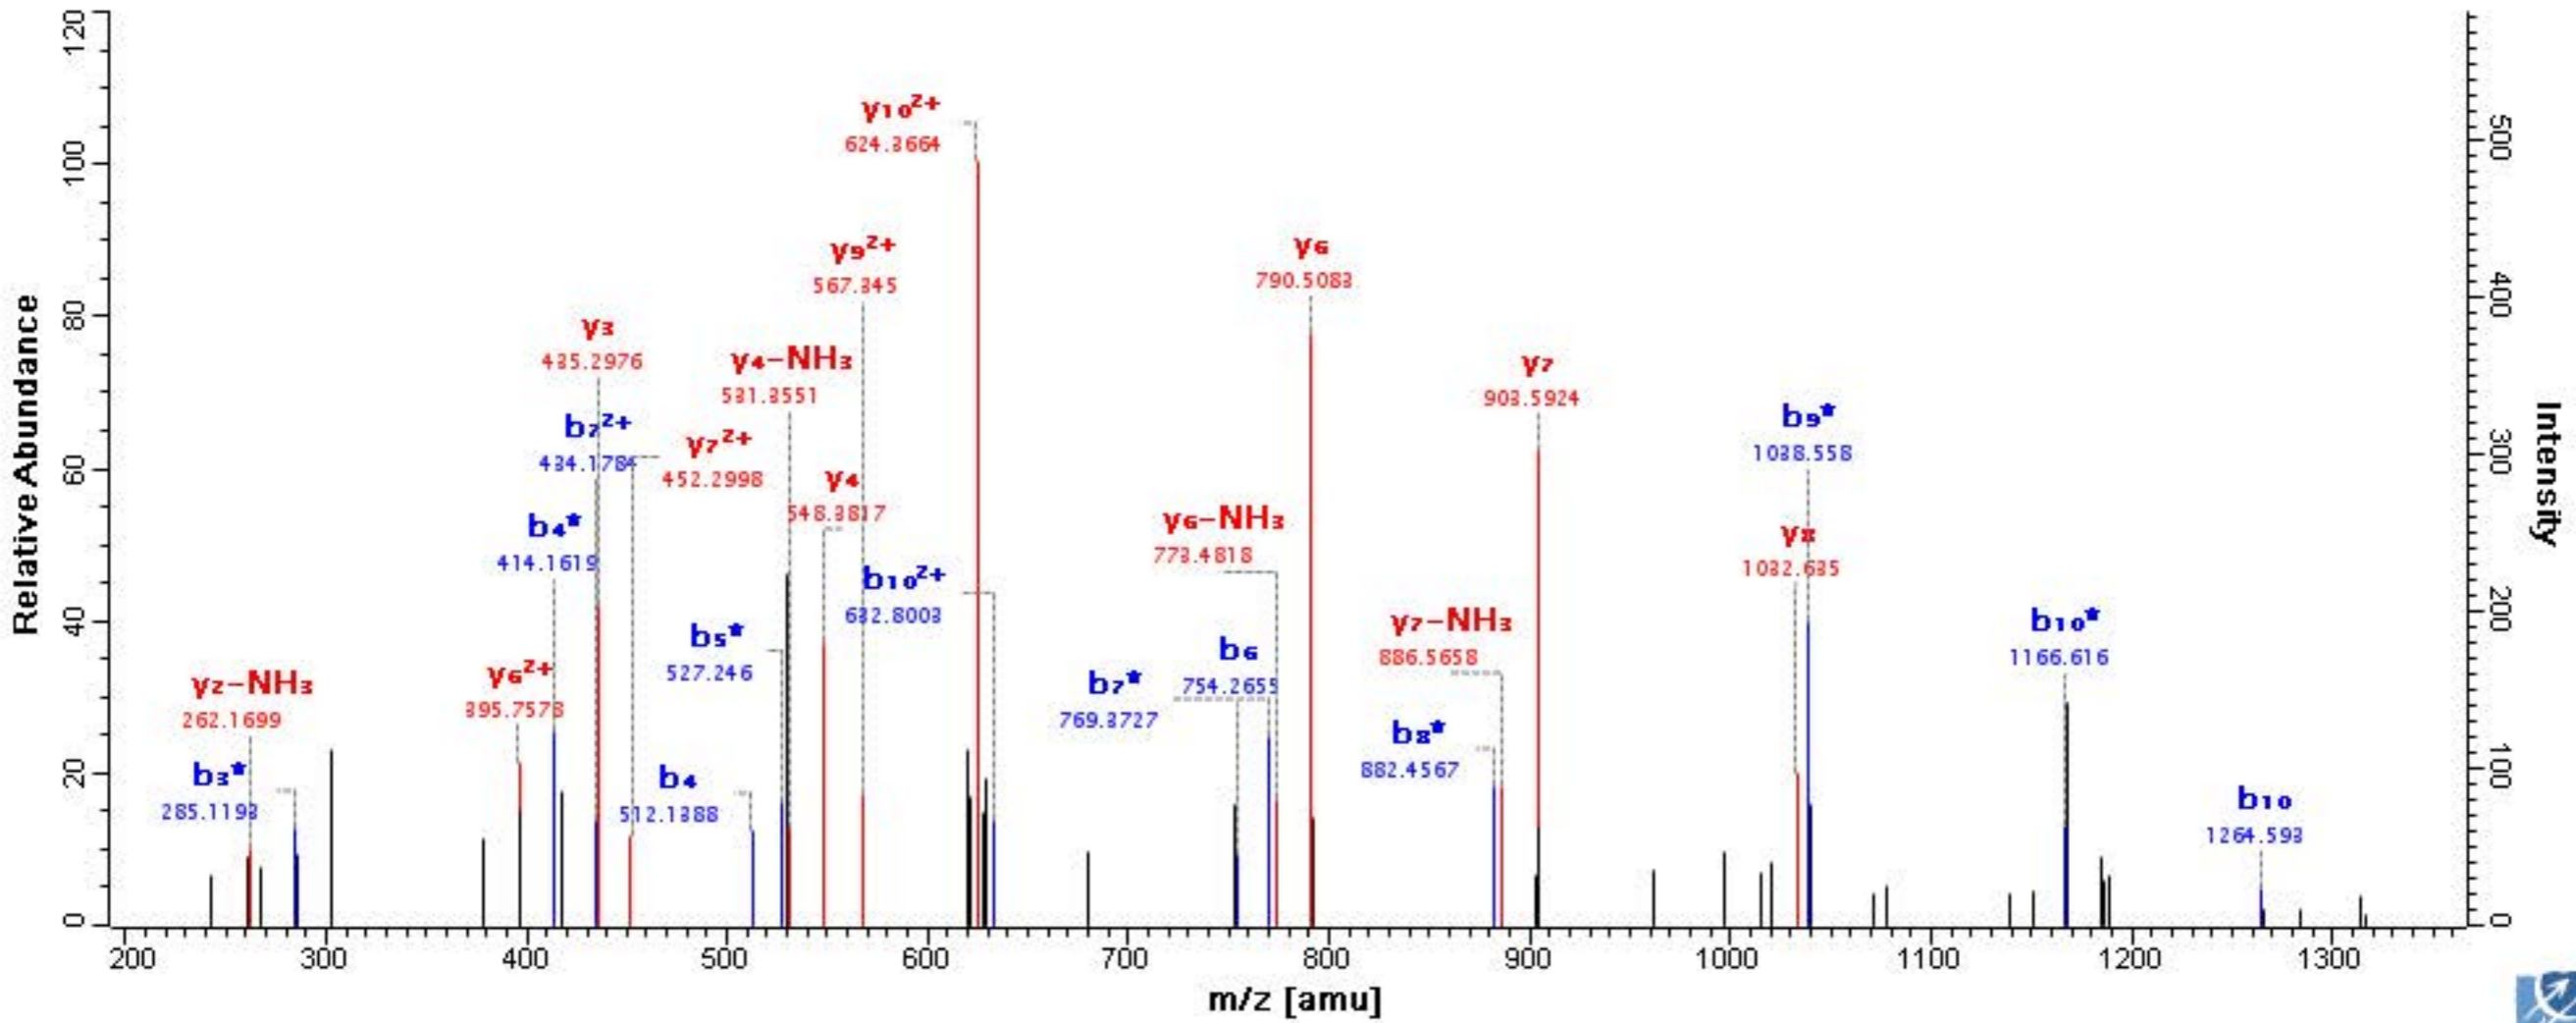

#### precursor information

|                   |                     |
|-------------------|---------------------|
| Mass:             | 1413.71629          |
| m/z:              | System.Collections. |
| Charge:           | System.Collections. |
| Retentiontime:    | System.Collections. |
| Score:            | 156.5811            |
| Mass Error [ppm]: | -0.26251            |
| PEP:              | 4.1179E-16          |
| Precursor Type:   | ISO                 |

#### general information

|                       |          |
|-----------------------|----------|
| Annotation:           | 9 of 11  |
| AminoAcids Coverage:  | 82 %     |
| Intensity Coverage:   | 60 %     |
| Protein Localisation: | 2 ... 12 |

| b <sup>2+</sup> ion |          | b ion     |          |    |     |    | γ ion    |           | γ <sup>2+</sup> ion |           |
|---------------------|----------|-----------|----------|----|-----|----|----------|-----------|---------------------|-----------|
| Δ dalton            | mass     | Δ dalton  | mass     |    | seq |    | Δ dalton | mass      | Δ dalton            | mass      |
|                     | 168.0056 |           | 168.0056 | 1  | S   | 10 |          |           |                     |           |
|                     | 282.0486 |           | 282.0486 | 2  | N   | 9  | 1247.726 |           | 624.3664            | +0.10647  |
|                     | 383.0962 |           | 383.0962 | 3  | T   | 8  | 1133.683 |           | 567.345             | +0.058354 |
|                     | 512.1388 | +0.157491 | 512.1388 | 4  | E   | 7  | 1032.635 | +0.127962 | 1032.635            |           |
|                     | 625.2229 |           | 625.2229 | 5  | I   | 6  | 903.5924 | +0.05294  | 452.2998            | -0.181789 |
|                     | 754.2655 | +0.260449 | 754.2655 | 6  | E   | 5  | 790.5083 | -0.114705 | 395.7578            | +0.32405  |
| +0.382131           | 434.1784 |           | 867.3496 | 7  | I   | 4  | 661.4657 |           | 661.4657            |           |
|                     | 980.4336 |           | 980.4336 | 8  | I   | 3  | 548.3817 | +0.082326 | 548.3817            |           |
|                     | 1136.535 |           | 1136.535 | 9  | R   | 2  | 435.2976 | +0.102608 | 435.2976            |           |
| -0.040099           | 632.8003 | -0.162522 | 1264.593 | 10 | Q   | 1  | 279.1965 |           | 279.1965            |           |
|                     |          |           |          | 11 | K   | 0  | 151.1379 |           | 151.1379            |           |

Source: 201 20325\_VR\_Bsu\_TripleSILAC\_pL2ESLSrep\_F04  
 Scannumber: 8513  
 Protein: BSU37120; fba; fba1; fbaA; tsr  
 Peptide Score: 79.65  
 Method: ITMS; CID; 3

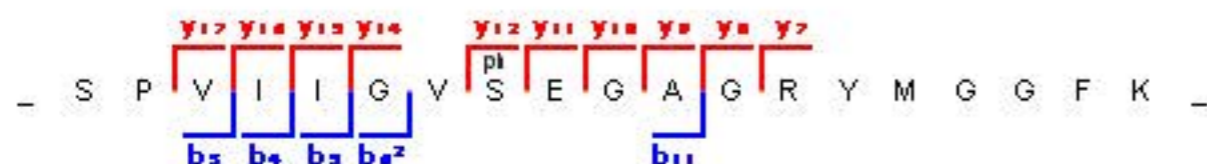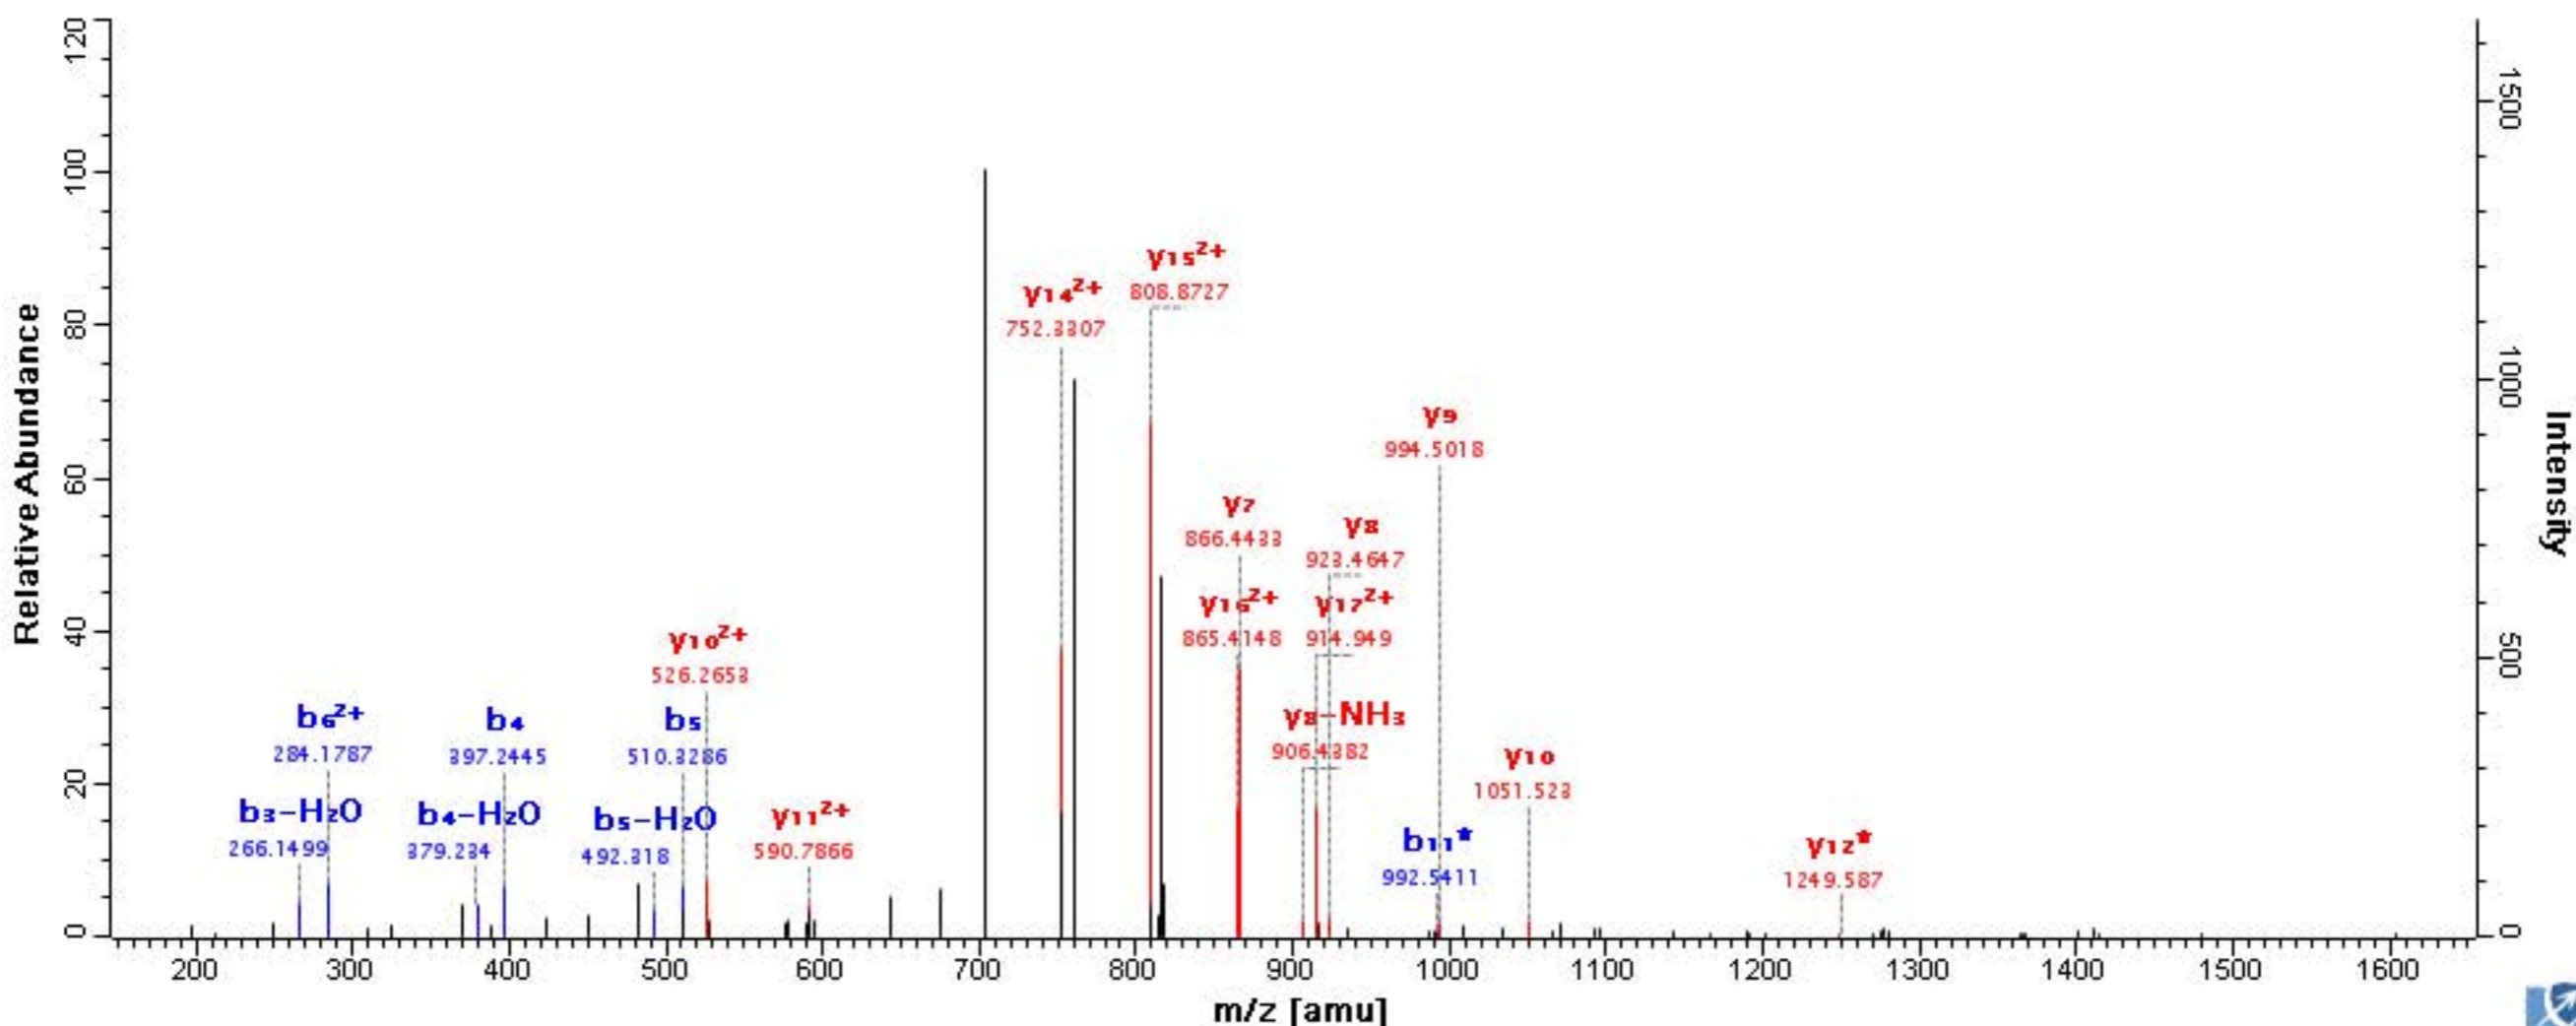

precursor information

|                   |                     |
|-------------------|---------------------|
| Mass:             | 2003.95453          |
| m/z:              | System.Collections. |
| Charge:           | System.Collections. |
| Retentiontime:    | System.Collections. |
| Score:            | 79.65154            |
| Mass Error [ppm]: | 0.26342             |
| PEP:              | 8.8689E-05          |
| Precursor Type:   | MULTI               |

| b <sup>2+</sup> ion |          | b ion     |          |     |   | γ ion    |          | γ <sup>2+</sup> ion |                    |
|---------------------|----------|-----------|----------|-----|---|----------|----------|---------------------|--------------------|
| Δ dalton            | mass     | Δ dalton  | mass     | seq |   | Δ dalton | mass     | Δ dalton            | mass               |
|                     | 88.0393  |           | 88.0393  | 1   | S | 18       |          |                     |                    |
|                     | 185.0921 |           | 185.0921 | 2   | P | 17       | 1925.943 |                     | 1925.943           |
|                     | 284.1605 |           | 284.1605 | 3   | V | 16       | 1828.891 |                     | 914.949 +0.227535  |
|                     | 397.2445 | -0.014261 | 397.2445 | 4   | I | 15       | 1729.822 |                     | 865.4148 +0.042565 |
|                     | 510.3286 | +0.043887 | 510.3286 | 5   | I | 14       | 1616.738 |                     | 808.8727 +0.160646 |
| +0.052373           | 284.1787 |           | 567.3501 | 6   | G | 13       | 1503.654 |                     | 752.3307 -0.024983 |
|                     | 666.4185 |           | 666.4185 | 7   | V | 12       | 1446.633 |                     | 1446.633           |
|                     | 833.4168 |           | 833.4168 | 8   | S | 11       | 1347.564 |                     | 1347.564           |
|                     | 962.4594 |           | 962.4594 | 9   | E | 10       | 1180.566 |                     | 590.7866 +0.068879 |
|                     | 1019.481 |           | 1019.481 | 10  | G | 9        | 1051.523 | -0.104364           | 526.2653 +0.010159 |
|                     | 1090.518 |           | 1090.518 | 11  | A | 8        | 994.5018 | -0.085098           | 994.5018           |
|                     | 1147.539 |           | 1147.539 | 12  | G | 7        | 923.4647 | +0.095082           | 923.4647           |
|                     | 1303.641 |           | 1303.641 | 13  | R | 6        | 866.4433 | -0.331391           | 866.4433           |
|                     | 1466.704 |           | 1466.704 | 14  | Y | 5        | 710.3422 |                     | 710.3422           |
|                     | 1597.744 |           | 1597.744 | 15  | M | 4        | 547.2788 |                     | 547.2788           |
|                     | 1654.766 |           | 1654.766 | 16  | G | 3        | 416.2383 |                     | 416.2383           |
|                     | 1711.787 |           | 1711.787 | 17  | G | 2        | 359.2169 |                     | 359.2169           |
|                     | 1858.856 |           | 1858.856 | 18  | F | 1        | 302.1954 |                     | 302.1954           |
|                     |          |           |          | 19  | K | 0        | 155.127  |                     | 155.127            |

general information

|                       |           |
|-----------------------|-----------|
| Annotation:           | 10 of 19  |
| AminoAcids Coverag    | 53 %      |
| Intensity Coverage:   | 39 %      |
| Protein Localisation: | 43 ... 61 |



Source: 20120325\_VR\_Bsu\_TripleSILAC\_pL2ESLRep\_F05  
 Scannumber: 2651  
 Protein: BSU13180; metC; metE  
 Peptide Score: 80.24  
 Method: ITMS; CID; 3

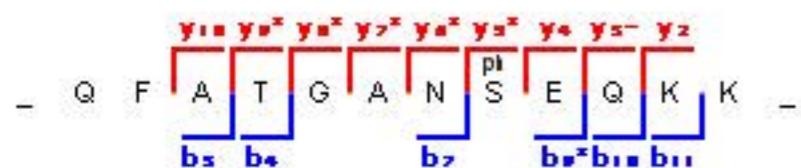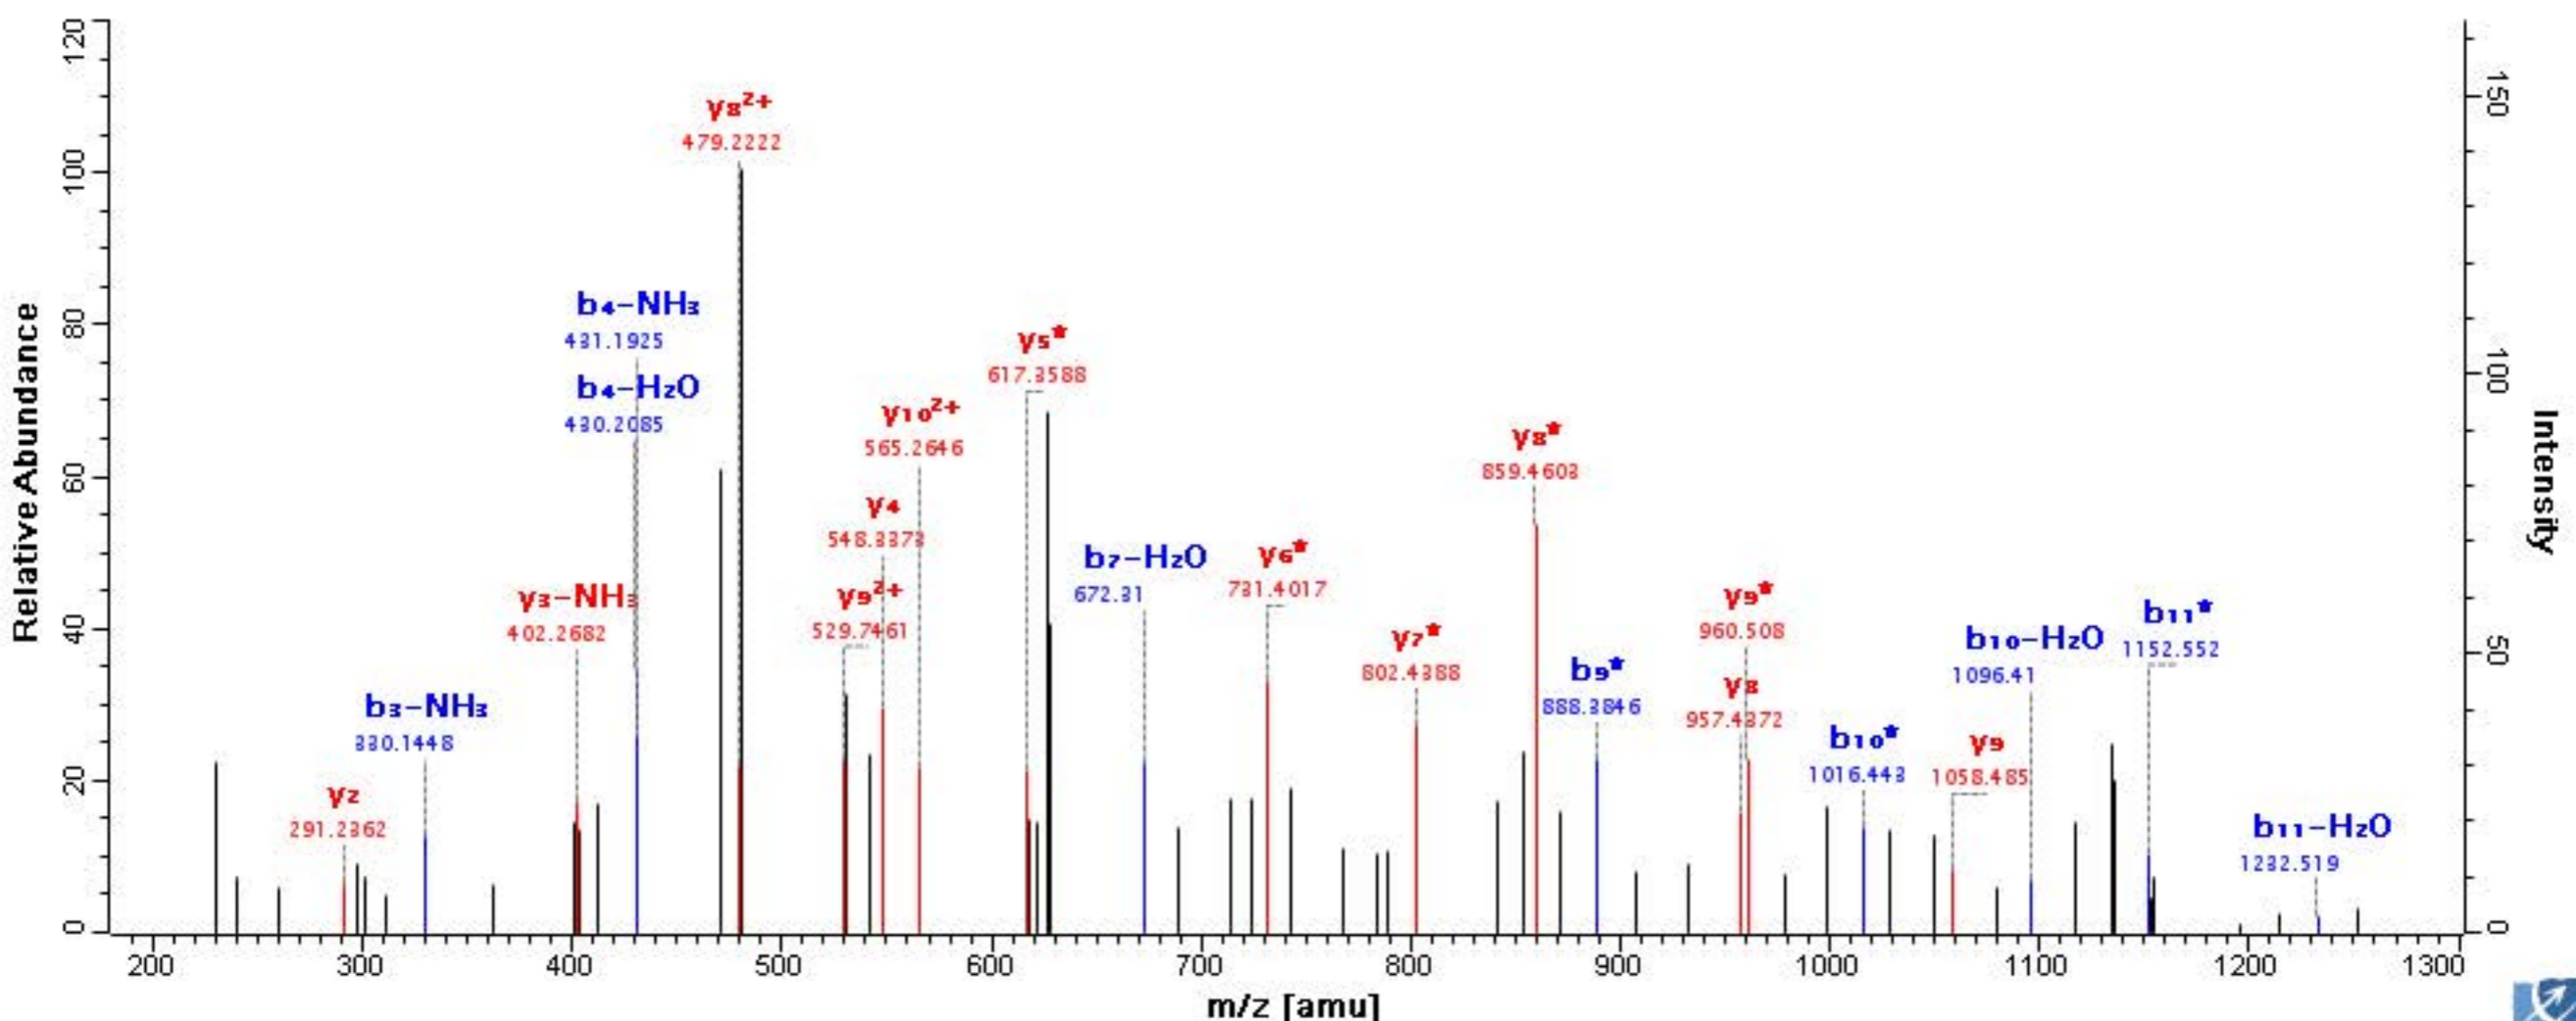

#### precursor information

|                   |                     |
|-------------------|---------------------|
| Mass:             | 1387.61341          |
| m/z:              | System.Collections. |
| Charge:           | System.Collections. |
| Retentiontime:    | System.Collections. |
| Score:            | 80.24471            |
| Mass Error [ppm]: | 0.073627            |
| PEP:              | 0.0056496           |
| Precursor Type:   | MULTI               |

#### general information

|                       |             |
|-----------------------|-------------|
| Annotation:           | 9 of 12     |
| AminoAcids Coverag    | 75 %        |
| Intensity Coverage:   | 37 %        |
| Protein Localisation: | 387 ... 398 |

| b ion    |              |    |     |    | γ ion        |            | γ <sup>2+</sup> ion |            |
|----------|--------------|----|-----|----|--------------|------------|---------------------|------------|
| Δ dalton | mass         |    | seq |    | Δ dalton     | mass       | Δ dalton            | mass       |
|          | 129.06585398 | 1  | Q   | 11 |              |            |                     |            |
|          | 276.13426789 | 2  | F   | 10 | 1276.5904054 |            | 1276.5904054        |            |
|          | 347.17138168 | 3  | A   | 9  | 1129.5219915 |            | 565.26463396        | +0.1157982 |
|          | 448.21906016 | 4  | T   | 8  | 1058.4848777 | +0.1650247 | 529.74607707        | -0.046248  |
|          | 505.24052388 | 5  | G   | 7  | 957.4371992  | +0.294002  | 479.2223783         | +0.272208  |
|          | 576.27763767 | 6  | A   | 6  | 900.41573548 |            | 900.41573548        |            |
|          | 690.32056511 | 7  | N   | 5  | 829.37862169 |            | 829.37862169        |            |
|          | 857.31892393 | 8  | S   | 4  | 715.33569424 |            | 715.33569424        |            |
|          | 986.36151703 | 9  | E   | 3  | 548.33733542 | +0.0840513 | 548.33733542        |            |
|          | 1114.4200945 | 10 | Q   | 2  | 419.29474233 |            | 419.29474233        |            |
|          | 1250.5292564 | 11 | K   | 1  | 291.23616481 | +0.0780442 | 291.23616481        |            |
|          |              | 12 | K   | 0  | 155.12700298 |            | 155.12700298        |            |

Source: 20120325\_VR\_Bsu\_TripleSILAC\_pL2ESLRep\_F05  
 Scannumber: 3389  
 Protein: BSU15470; pyrR  
 Peptide Score: 143.24  
 Method: ITMS; CID; 3

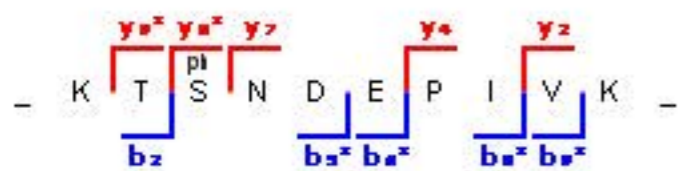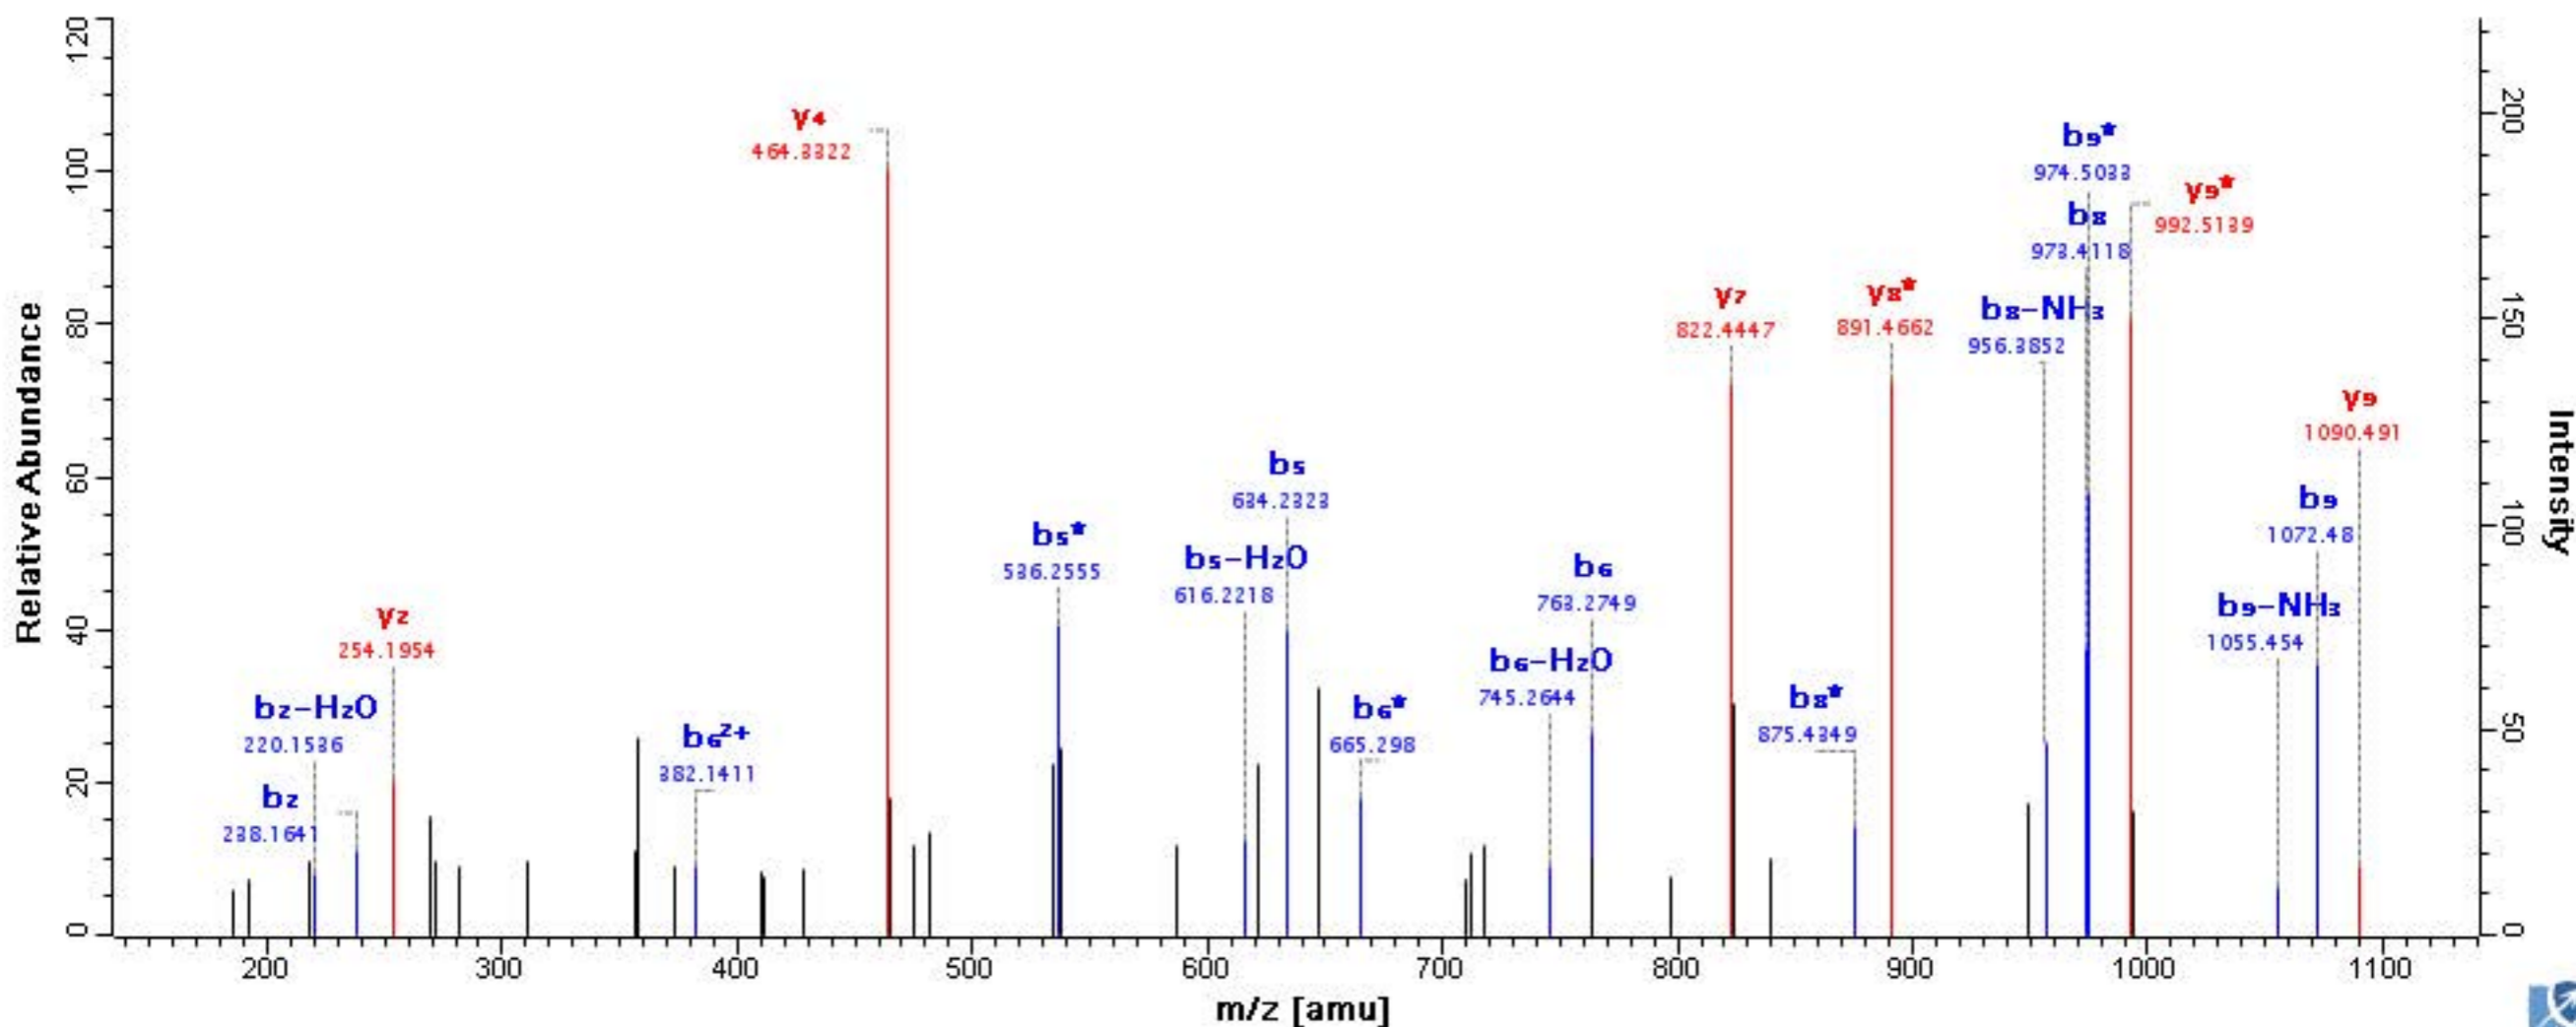

#### precursor information

|                   |                     |
|-------------------|---------------------|
| Mass:             | 1209.56424          |
| m/z:              | System.Collections. |
| Charge:           | System.Collections. |
| Retentiontime:    | System.Collections. |
| Score:            | 143.2381            |
| Mass Error [ppm]: | 0.0027659           |
| PEP:              | 9.54E-09            |
| Precursor Type:   | MULTI               |

#### general information

|                       |           |
|-----------------------|-----------|
| Annotation:           | 8 of 10   |
| AminoAcids Coverage:  | 80 %      |
| Intensity Coverage:   | 61 %      |
| Protein Localisation: | 79 ... 88 |

| b <sup>2+</sup> ion |              | b ion      |              |     | y ion    |      |              |            |
|---------------------|--------------|------------|--------------|-----|----------|------|--------------|------------|
| Δ dalton            | mass         | Δ dalton   | mass         | seq | Δ dalton | mass |              |            |
|                     | 137.1164383  |            | 137.1164383  | 1   | K        | 9    |              |            |
|                     | 238.16411677 | +0.0524512 | 238.16411677 | 2   | T        | 8    | 1090.4907456 | -0.1543198 |
|                     | 405.16247559 |            | 405.16247559 | 3   | S        | 7    | 989.44306713 |            |
|                     | 519.20540304 |            | 519.20540304 | 4   | N        | 6    | 822.44470831 | -0.0601868 |
|                     | 634.23234607 | +0.0893702 | 634.23234607 | 5   | D        | 5    | 708.40178086 |            |
| -0.2192939          | 382.14110782 | -0.0343996 | 763.27493917 | 6   | E        | 4    | 593.37483783 |            |
|                     | 860.32770302 |            | 860.32770302 | 7   | P        | 3    | 464.33224473 | -0.0083312 |
|                     | 973.411767   | +0.2442999 | 973.411767   | 8   | I        | 2    | 367.27948088 |            |
|                     | 1072.4801809 | -0.1042044 | 1072.4801809 | 9   | V        | 1    | 254.1954169  | +0.0397821 |
|                     |              |            |              | 10  | K        | 0    | 155.12700298 |            |

Source: 20120325\_VR\_Bsu\_TripleSILAC\_pL2ESLRep\_F05  
 Scannumber: 6130  
 Protein: BSU00480; yabj  
 Peptide Score: 78.69  
 Method: ITMS; CID; 3

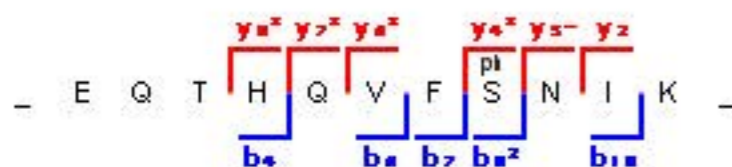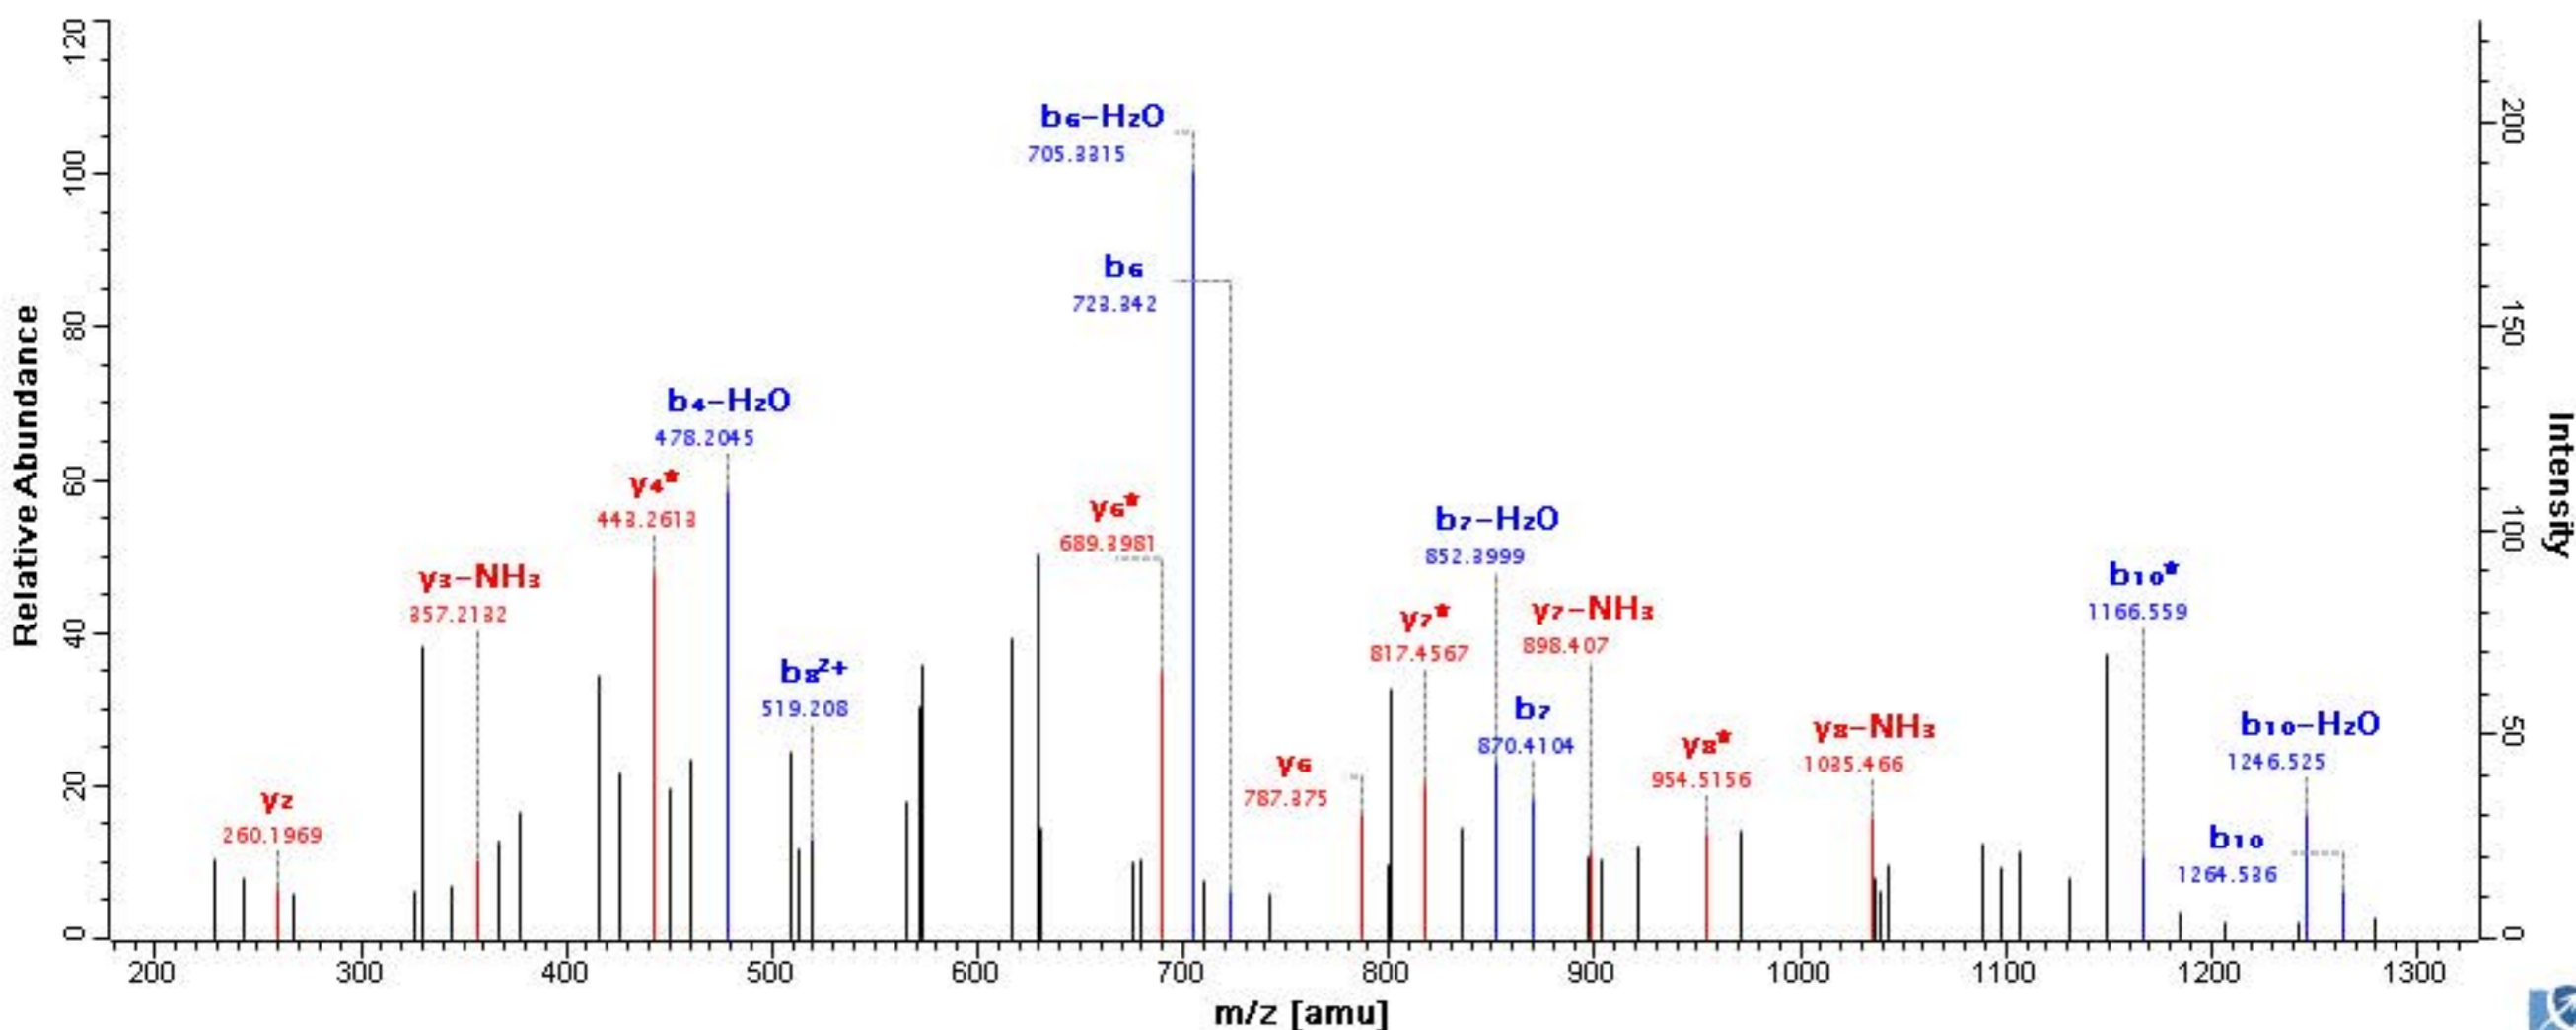

#### precursor information

|                   |                     |
|-------------------|---------------------|
| Mass:             | 1409.6346           |
| m/z:              | System.Collections. |
| Charge:           | System.Collections. |
| Retentiontime:    | System.Collections. |
| Score:            | 78.69199            |
| Mass Error [ppm]: | 0.39263             |
| PEP:              | 0.0092882           |
| Precursor Type:   | MULTI               |

#### general information

|                       |           |
|-----------------------|-----------|
| Annotation:           | 8 of 11   |
| AminoAcids Coverage:  | 73 %      |
| Intensity Coverage:   | 38 %      |
| Protein Localisation: | 48 ... 58 |

| b <sup>2+</sup> ion |              | b ion           |              |     | y ion           |      |
|---------------------|--------------|-----------------|--------------|-----|-----------------|------|
| $\Delta$ dalton     | mass         | $\Delta$ dalton | mass         | seq | $\Delta$ dalton | mass |
|                     | 130.04986956 |                 | 130.04986956 | 1   | E               | 10   |
|                     | 258.10844707 |                 | 258.10844707 | 2   | Q               | 9    |
|                     | 359.15612555 |                 | 359.15612555 | 3   | T               | 8    |
|                     | 496.21503741 |                 | 496.21503741 | 4   | H               | 7    |
|                     | 624.27361492 |                 | 624.27361492 | 5   | Q               | 6    |
|                     | 723.34202884 | -0.0235474      | 723.34202884 | 6   | V               | 5    |
|                     | 870.41044275 | +0.2191959      | 870.41044275 | 7   | F               | 4    |
| -0.2660835          | 519.20803902 |                 | 1037.4088016 | 8   | S               | 3    |
|                     | 1151.451729  |                 | 1151.451729  | 9   | N               | 2    |
|                     | 1264.535793  | +0.2201884      | 1264.535793  | 10  | I               | 1    |
|                     |              |                 |              | 11  | K               | 0    |

Source: 20120325\_VR\_Bsu\_TripleSILAC\_pL2ESLRep\_F05  
 Scannumber: 6653  
 Protein: BSU18000; citB  
 Peptide Score: 151.99  
 Method: ITMS; CID; 3

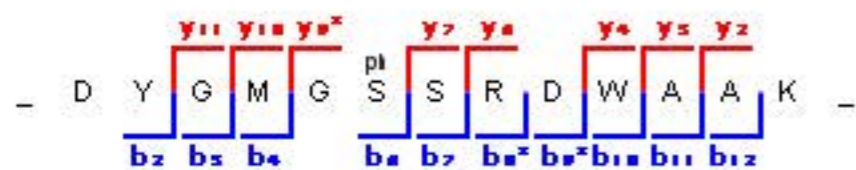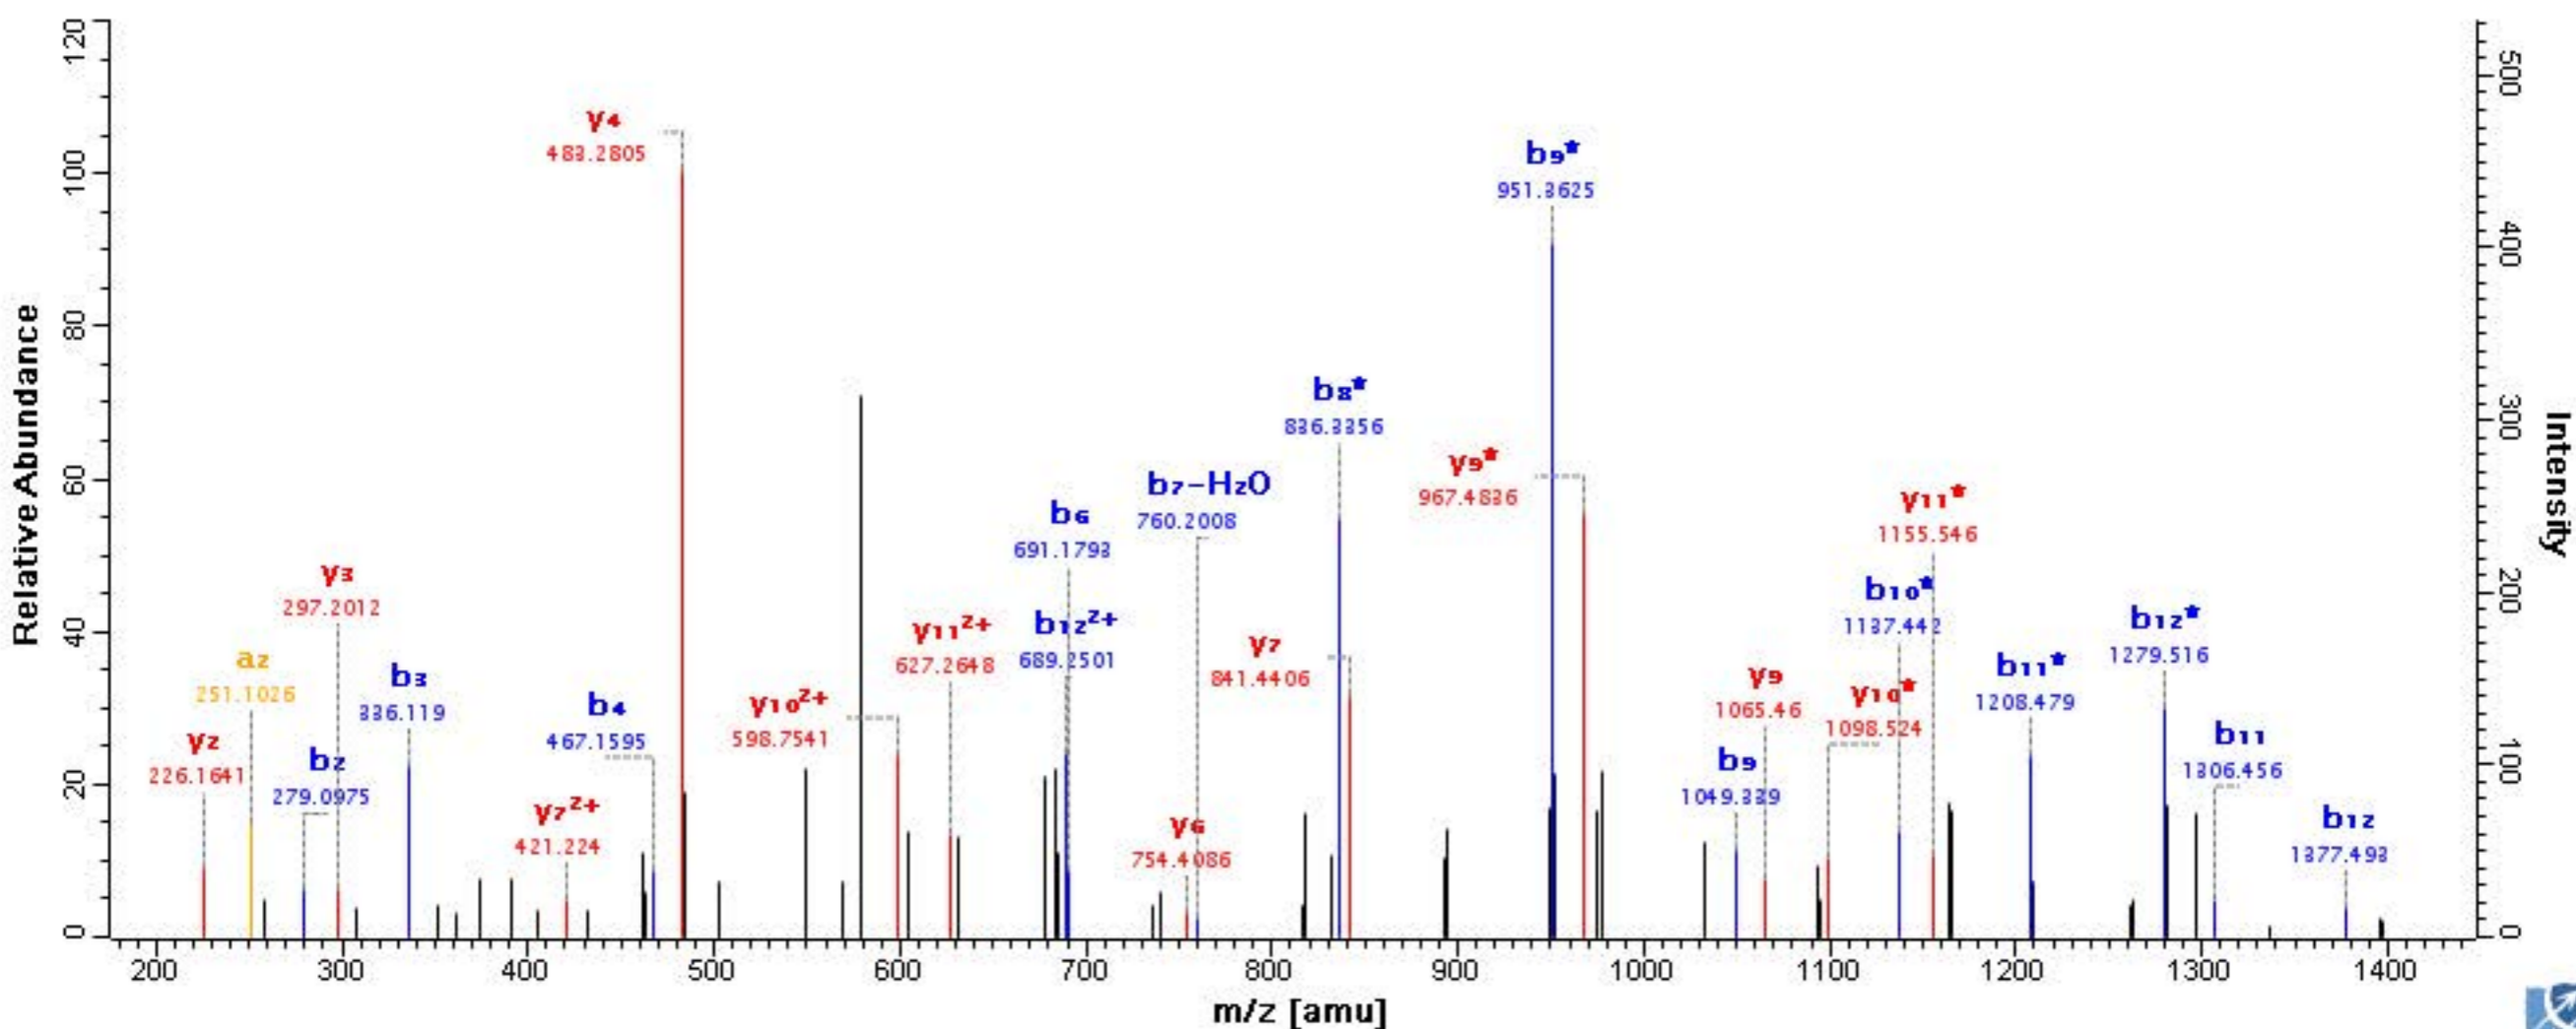

#### precursor information

|                   |                     |
|-------------------|---------------------|
| Mass:             | 1522.591            |
| m/z:              | System.Collections. |
| Charge:           | System.Collections. |
| Retentiontime:    | System.Collections. |
| Score:            | 151.9937            |
| Mass Error [ppm]: | -0.12559            |
| PEP:              | 1.6281E-17          |
| Precursor Type:   | MULTI               |

#### general information

|                       |             |
|-----------------------|-------------|
| Annotation:           | 11 of 13    |
| AminoAcids Coverage:  | 85 %        |
| Intensity Coverage:   | 53 %        |
| Protein Localisation: | 787 ... 799 |

| a ion    |         | b <sup>2+</sup> ion |         | b ion    |         |    |     | y ion    |          | y <sup>2+</sup> ion |         |
|----------|---------|---------------------|---------|----------|---------|----|-----|----------|----------|---------------------|---------|
| Δ dalton | mass    | Δ dalton            | mass    | Δ dalton | mass    |    | seq | Δ dalton | mass     | Δ dalton            | mass    |
|          | 88.0393 |                     | 116.034 |          | 116.034 | 1  | D   |          |          |                     |         |
| -0.0353  | 251.103 |                     | 279.098 | +0.0583  | 279.098 | 2  | Y   | 1416.59  |          | 1416.59             |         |
|          | 308.124 |                     | 336.119 | +0.0409  | 336.119 | 3  | G   | 1253.52  |          | 627.265             | +0.0783 |
|          | 439.165 |                     | 467.159 | -0.0069  | 467.159 | 4  | M   | 1196.5   |          | 598.754             | -0.1643 |
|          | 496.186 |                     | 524.181 |          | 524.181 | 5  | G   | 1065.46  | -0.0764  | 1065.46             |         |
|          | 663.184 |                     | 691.179 | -0.4551  | 691.179 | 6  | S   | 1008.44  |          | 1008.44             |         |
|          | 750.216 |                     | 778.211 |          | 778.211 | 7  | S   | 841.441  | -0.0834  | 421.224             | -0.0153 |
|          | 906.318 |                     | 934.312 |          | 934.312 | 8  | R   | 754.409  | +0.07138 | 754.409             |         |
|          | 1021.34 |                     | 1049.34 | +0.11519 | 1049.34 | 9  | D   | 598.307  |          | 598.307             |         |
|          | 1207.42 |                     | 1235.42 |          | 1235.42 | 10 | W   | 483.281  | +0.01865 | 483.281             |         |
|          | 1278.46 |                     | 1306.46 | +0.11876 | 1306.46 | 11 | A   | 297.201  | +0.06952 | 297.201             |         |
|          | 1349.5  | -0.3873             | 689.25  | +0.11741 | 1377.49 | 12 | A   | 226.164  | +0.06583 | 226.164             |         |
|          |         |                     |         |          |         | 13 | K   | 155.127  |          | 155.127             |         |

Source: 20120325\_VR\_Bsu\_TripleSILAC\_pL2ESLRep\_F07  
 Scannumber: 3586  
 Protein: BSU25400; yqeY  
 Peptide Score: 108.47  
 Method: ITMS; CID; 3

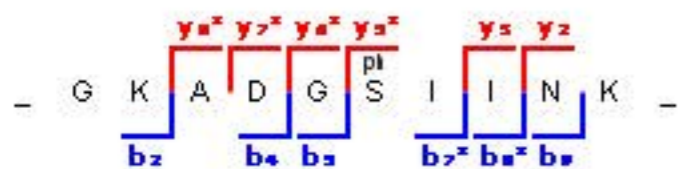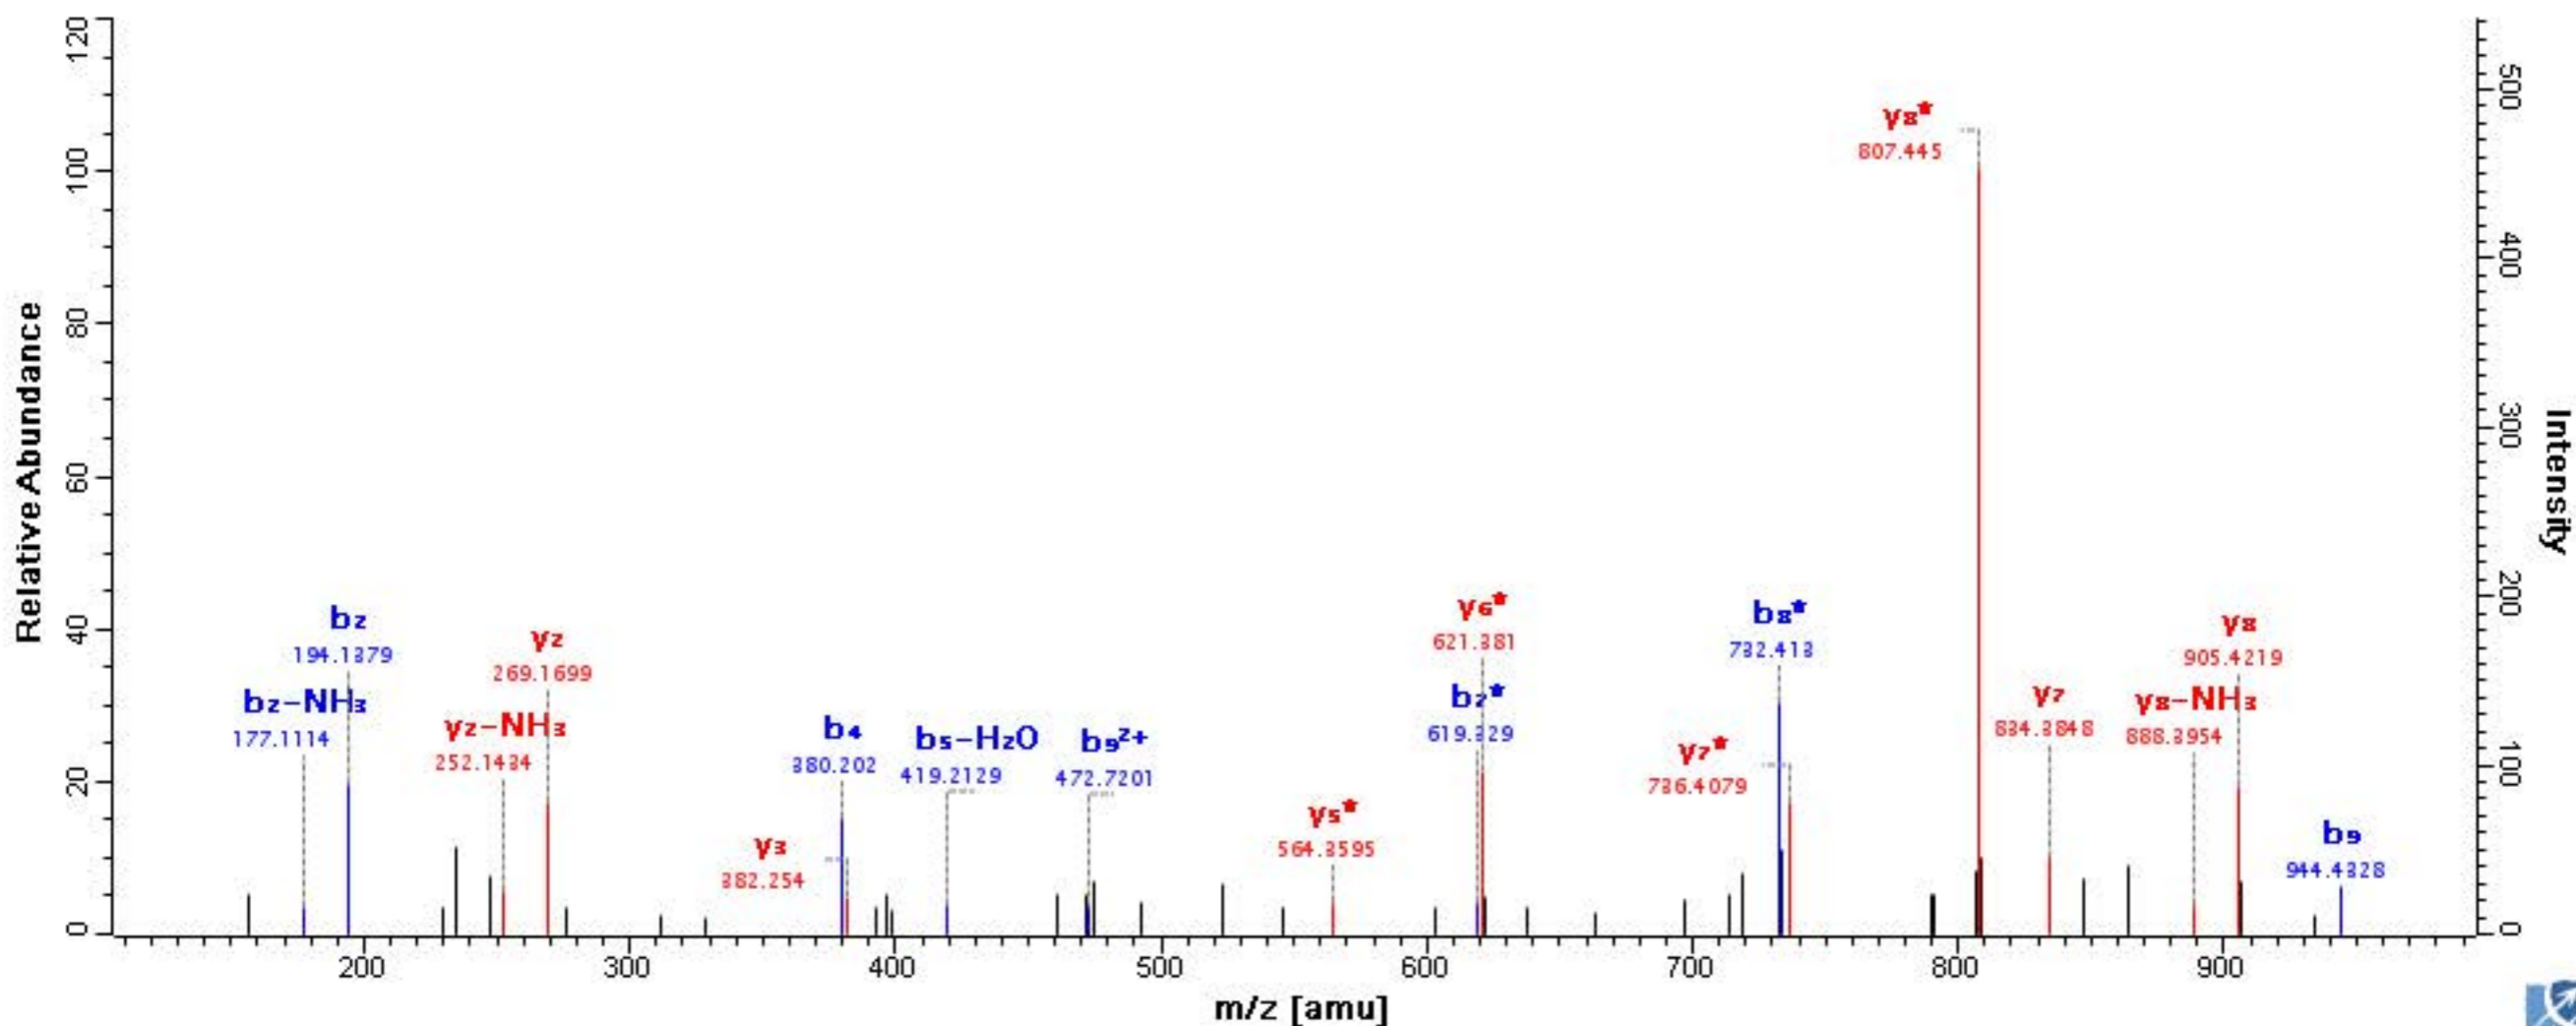

#### precursor information

|                   |                     |
|-------------------|---------------------|
| Mass:             | 1081.51683          |
| m/z:              | System.Collections. |
| Charge:           | System.Collections. |
| Retentiontime:    | System.Collections. |
| Score:            | 108.4698            |
| Mass Error [ppm]: | -0.053096           |
| PEP:              | 0.0020667           |
| Precursor Type:   | MULTI               |

#### general information

|                       |             |
|-----------------------|-------------|
| Annotation:           | 8 of 10     |
| AminoAcids Coverage:  | 80 %        |
| Intensity Coverage:   | 62 %        |
| Protein Localisation: | 132 ... 141 |

| b <sup>2+</sup> ion |              | b ion      |              |     | y ion    |      |                         |
|---------------------|--------------|------------|--------------|-----|----------|------|-------------------------|
| Δ dalton            | mass         | Δ dalton   | mass         | seq | Δ dalton | mass |                         |
|                     | 58.02874019  |            | 58.02874019  | 1   | G        | 9    |                         |
|                     | 194.13790202 | -0.0417106 | 194.13790202 | 2   | K        | 8    | 1041.5310996            |
|                     | 265.17501581 |            | 265.17501581 | 3   | A        | 7    | 905.42193775 +0.0820295 |
|                     | 380.20195884 | +0.0319889 | 380.20195884 | 4   | D        | 6    | 834.38482397 +0.0155667 |
|                     | 437.22342256 |            | 437.22342256 | 5   | G        | 5    | 719.35788093            |
|                     | 604.22178138 |            | 604.22178138 | 6   | S        | 4    | 662.33641721            |
|                     | 717.30584536 |            | 717.30584536 | 7   | I        | 3    | 495.33805839            |
|                     | 830.38990934 |            | 830.38990934 | 8   | I        | 2    | 382.25399441 +0.0006443 |
| +0.169958           | 472.72005663 | -0.0466674 | 944.43283679 | 9   | N        | 1    | 269.16993043 +0.0615454 |
|                     |              |            |              | 10  | K        | 0    | 155.12700298            |

Source: 20120325\_VR\_Bsu\_TripleSILAC\_pL2ESLrep\_F09  
 Scannumber: 4158  
 Protein: BSU13130; proA  
 Peptide Score: 92.77  
 Method: ITMS; CID; 3

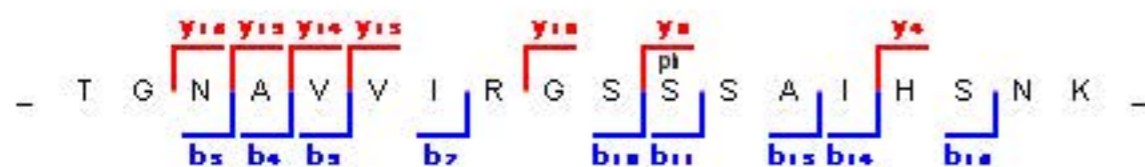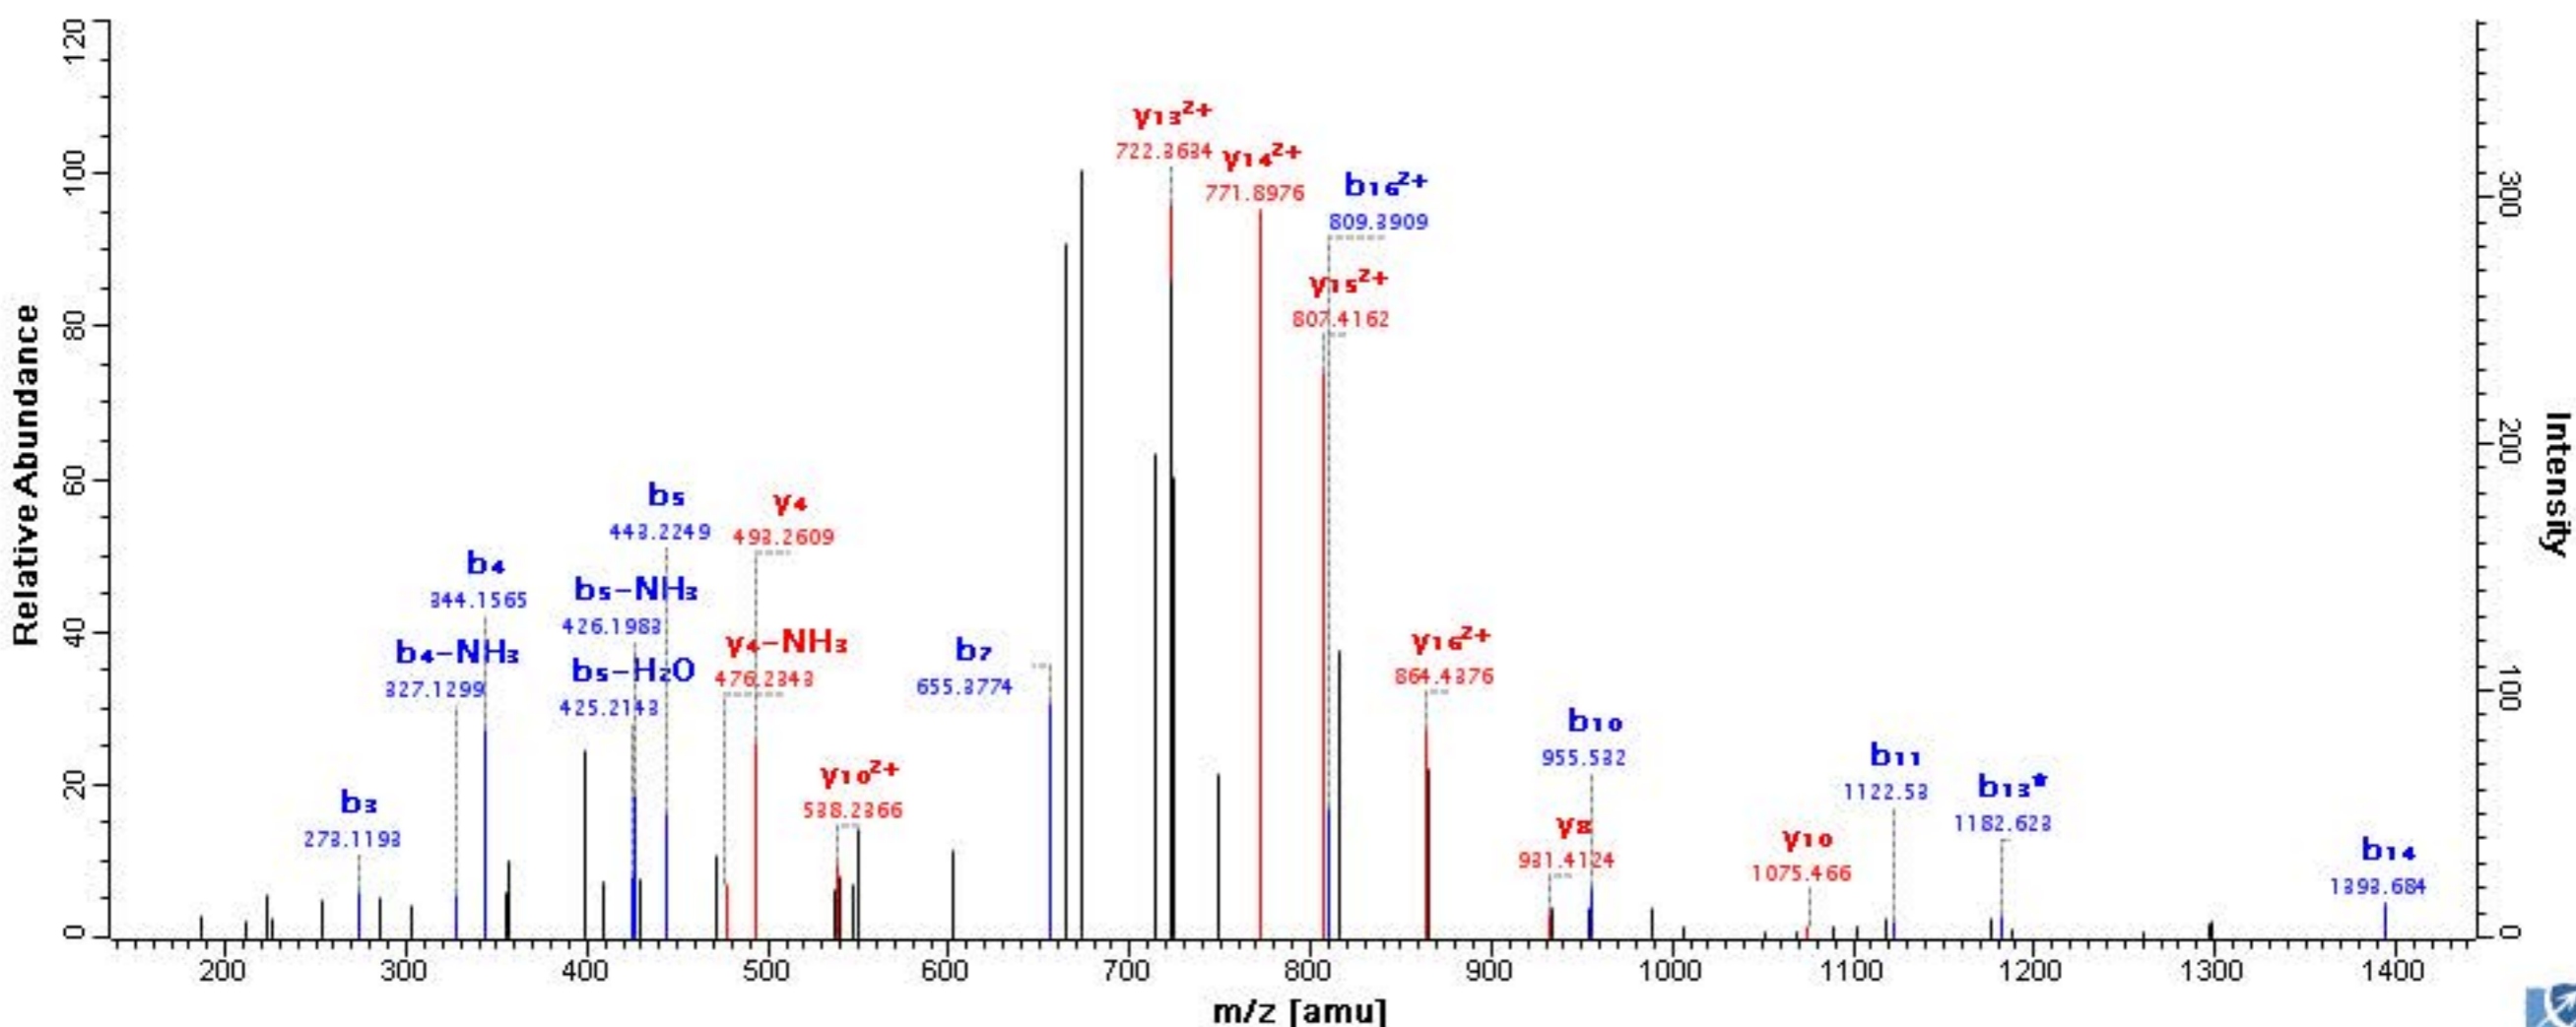

#### precursor information

|                   |                     |
|-------------------|---------------------|
| Mass:             | 1876.91607          |
| m/z:              | System.Collections. |
| Charge:           | System.Collections. |
| Retentiontime:    | System.Collections. |
| Score:            | 92.77254            |
| Mass Error [ppm]: | 0.22833             |
| PEP:              | 0.00033767          |
| Precursor Type:   | MULTI               |

| b <sup>2+</sup> ion |          | b ion     |          |    |     |    | y ion    |           | y <sup>2+</sup> ion |           |
|---------------------|----------|-----------|----------|----|-----|----|----------|-----------|---------------------|-----------|
| Δ dalton            | mass     | Δ dalton  | mass     |    | seq |    | Δ dalton | mass      | Δ dalton            | mass      |
|                     | 102.055  |           | 102.055  | 1  | T   | 17 |          |           |                     |           |
|                     | 159.0764 |           | 159.0764 | 2  | G   | 16 | 1784.889 |           | 1784.889            |           |
|                     | 273.1193 | +0.030434 | 273.1193 | 3  | N   | 15 | 1727.868 |           | 864.4376            | -0.086733 |
|                     | 344.1565 | +0.077305 | 344.1565 | 4  | A   | 14 | 1613.825 |           | 807.4162            | +0.14695  |
|                     | 443.2249 | -0.053243 | 443.2249 | 5  | V   | 13 | 1542.788 |           | 771.8976            | +0.21879  |
|                     | 542.2933 |           | 542.2933 | 6  | V   | 12 | 1443.72  |           | 722.3634            | -0.058282 |
|                     | 655.3774 | -0.028414 | 655.3774 | 7  | I   | 11 | 1344.651 |           | 1344.651            |           |
|                     | 811.4785 |           | 811.4785 | 8  | R   | 10 | 1231.567 |           | 1231.567            |           |
|                     | 868.4999 |           | 868.4999 | 9  | G   | 9  | 1075.466 | -0.218613 | 538.2366            | -0.196136 |
|                     | 955.532  | -0.107211 | 955.532  | 10 | S   | 8  | 1018.444 |           | 1018.444            |           |
|                     | 1122.53  | +0.175253 | 1122.53  | 11 | S   | 7  | 931.4124 | +0.120767 | 931.4124            |           |
|                     | 1209.562 |           | 1209.562 | 12 | S   | 6  | 764.4141 |           | 764.4141            |           |
|                     | 1280.599 |           | 1280.599 | 13 | A   | 5  | 677.382  |           | 677.382             |           |
|                     | 1393.684 | -0.026171 | 1393.684 | 14 | I   | 4  | 606.3449 |           | 606.3449            |           |
|                     | 1530.742 |           | 1530.742 | 15 | H   | 3  | 493.2609 | +0.035089 | 493.2609            |           |
| +0.1745             | 809.3909 |           | 1617.774 | 16 | S   | 2  | 356.202  |           | 356.202             |           |
|                     | 1731.817 |           | 1731.817 | 17 | N   | 1  | 269.1699 |           | 269.1699            |           |
|                     |          |           |          | 18 | K   | 0  | 155.127  |           | 155.127             |           |

#### general information

|                       |             |
|-----------------------|-------------|
| Annotation:           | 12 of 18    |
| AminoAcids Coverag    | 67 %        |
| Intensity Coverage:   | 41 %        |
| Protein Localisation: | 138 ... 155 |

Source: 20120325\_VR\_Bsu\_TripleSILAC\_pL2ESLrep\_F09  
 Scannumber: 9050  
 Protein: BSU16100; sucD  
 Peptide Score: 95.48  
 Method: ITMS; CID; 3

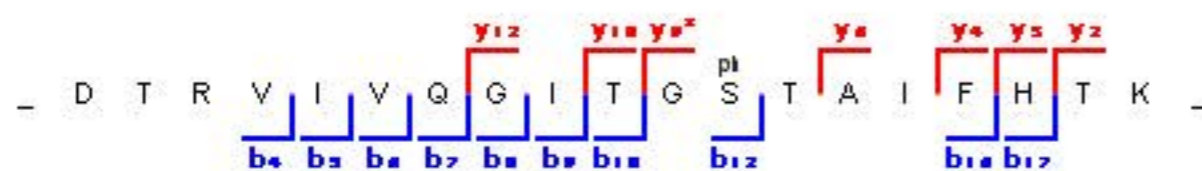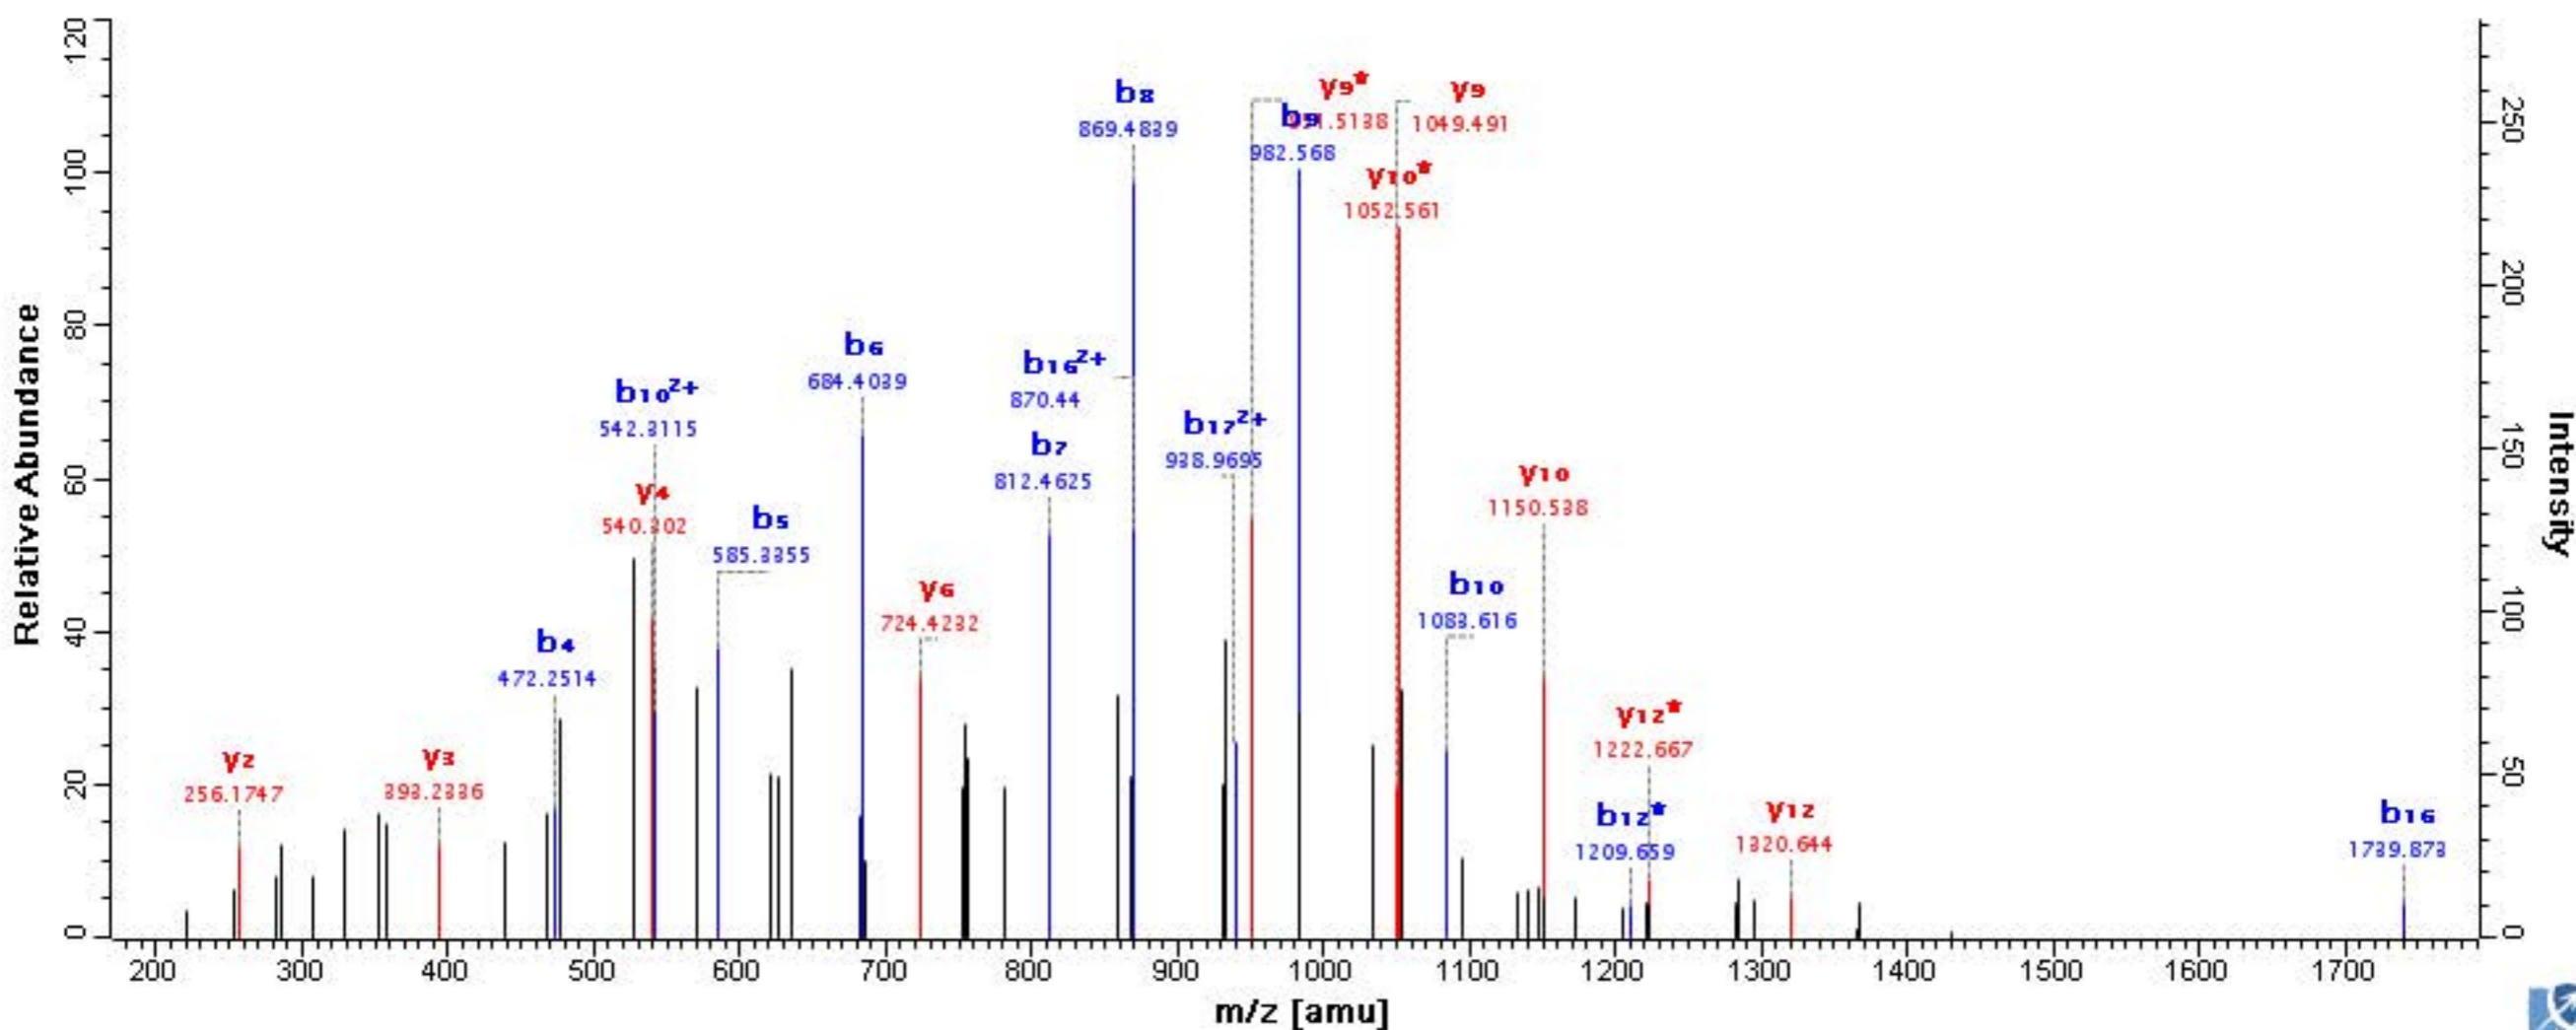

**precursor information**

|                   |                     |
|-------------------|---------------------|
| Mass:             | 2123.07775          |
| m/z:              | System.Collections. |
| Charge:           | System.Collections. |
| Retentiontime:    | System.Collections. |
| Score:            | 95.48004            |
| Mass Error [ppm]: | 0.059881            |
| PEP:              | 3.8836E-06          |
| Precursor Type:   | MULTI               |

| b <sup>2+</sup> ion |              | b ion      |              |    |     | y ion |              |            |
|---------------------|--------------|------------|--------------|----|-----|-------|--------------|------------|
| Δ dalton            | mass         | Δ dalton   | mass         |    | seq |       | Δ dalton     | mass       |
|                     | 116.0342195  |            | 116.0342195  | 1  | D   | 18    |              |            |
|                     | 217.08189797 |            | 217.08189797 | 2  | T   | 17    | 2017.072151  |            |
|                     | 373.183009   |            | 373.183009   | 3  | R   | 16    | 1916.0244726 |            |
|                     | 472.25142292 | +0.2244682 | 472.25142292 | 4  | V   | 15    | 1759.9233615 |            |
|                     | 585.3354869  | +0.0114369 | 585.3354869  | 5  | I   | 14    | 1660.8549476 |            |
|                     | 684.40390081 | +0.1541436 | 684.40390081 | 6  | V   | 13    | 1547.7708836 |            |
|                     | 812.46247833 | -0.0378567 | 812.46247833 | 7  | Q   | 12    | 1448.7024697 |            |
|                     | 869.48394205 | +0.0155086 | 869.48394205 | 8  | G   | 11    | 1320.6438922 | -0.2369098 |
|                     | 982.56800603 | +0.0522943 | 982.56800603 | 9  | I   | 10    | 1263.6224285 |            |
| -0.0235777          | 542.31148048 | +0.0887833 | 1083.6156845 | 10 | T   | 9     | 1150.5383645 | -0.0035745 |
|                     | 1140.6371482 |            | 1140.6371482 | 11 | G   | 8     | 1049.490686  | -0.1609741 |
|                     | 1307.635507  |            | 1307.635507  | 12 | S   | 7     | 992.4692223  |            |
|                     | 1408.6831855 |            | 1408.6831855 | 13 | T   | 6     | 825.47086348 |            |
|                     | 1479.7202993 |            | 1479.7202993 | 14 | A   | 5     | 724.423185   | -0.1030556 |
|                     | 1592.8043633 |            | 1592.8043633 | 15 | I   | 4     | 653.38607122 |            |
| +0.0669922          | 870.44002684 | -0.1556141 | 1739.8727772 | 16 | F   | 3     | 540.30200724 | +0.1699776 |
| +0.3972165          | 938.96948277 |            | 1876.9316891 | 17 | H   | 2     | 393.23359332 | -0.0441402 |
|                     | 1977.9793675 |            | 1977.9793675 | 18 | T   | 1     | 256.17468146 | +0.1257641 |
|                     |              |            |              | 19 | K   | 0     | 155.12700298 |            |

**general information**

|                       |          |
|-----------------------|----------|
| Annotation:           | 13 of 19 |
| AminoAcids Coverag    | 68 %     |
| Intensity Coverage:   | 52 %     |
| Protein Localisation: | 8 ... 26 |

Source: 201 20325\_VR\_Bsu\_TripleSILAC\_pL2ESLSrep\_F09  
 Scannumber: 9430  
 Protein: BSU03510; srfA3; srfAC  
 Peptide Score: 77.42  
 Method: ITMS; CID; 3

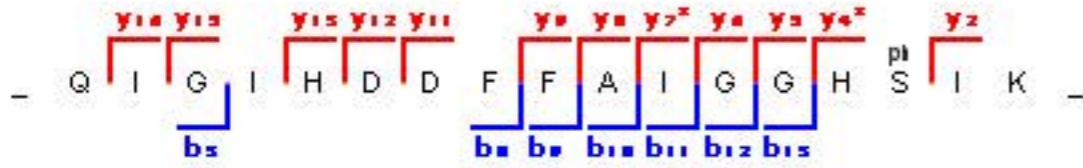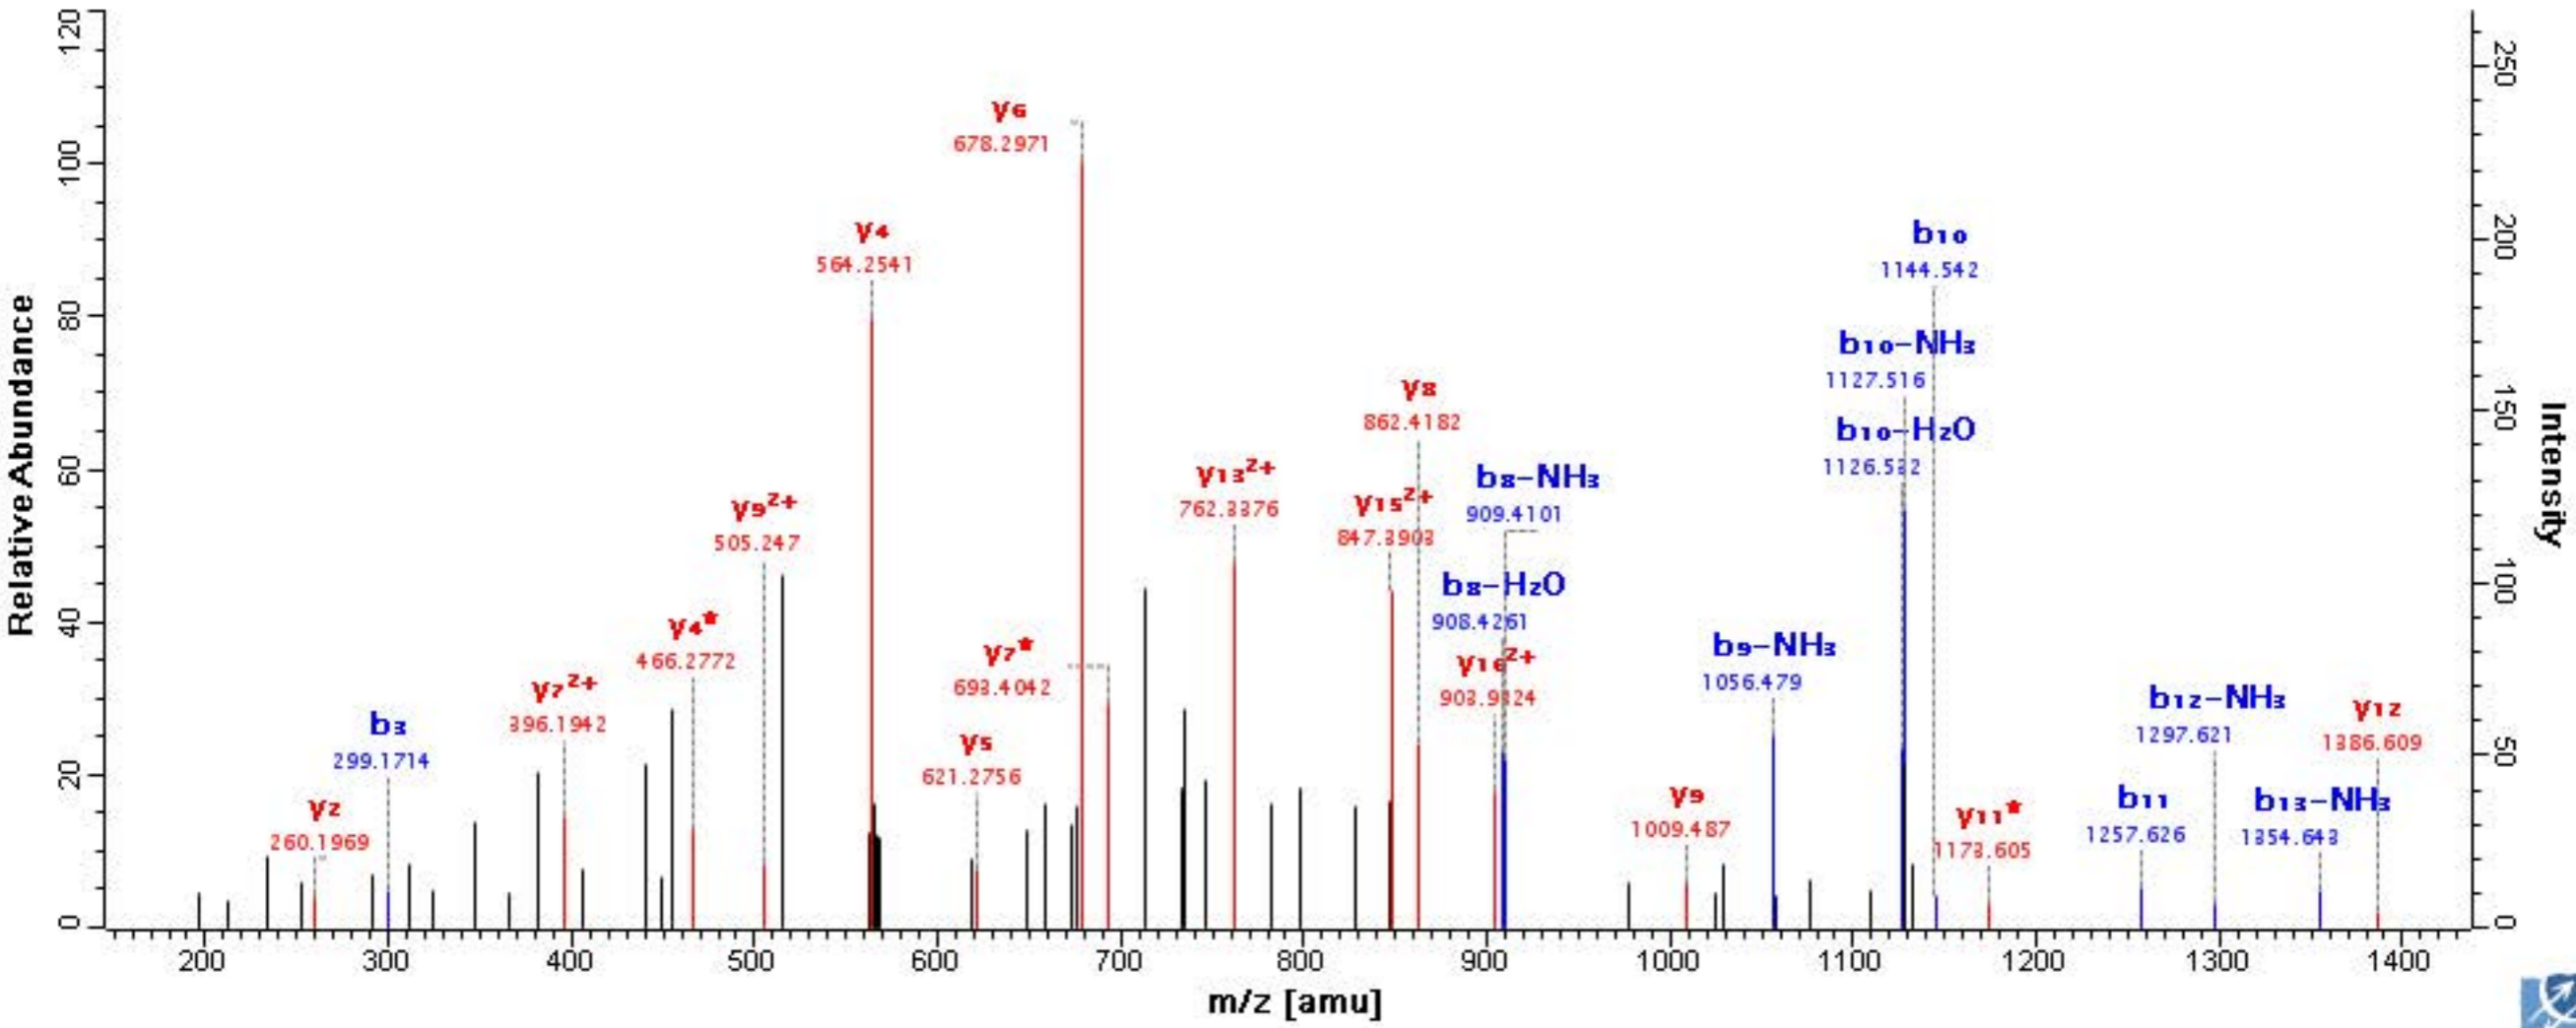

**precursor information**

|                   |                     |
|-------------------|---------------------|
| Mass:             | 1933.90939          |
| m/z:              | System.Collections. |
| Charge:           | System.Collections. |
| Retentiontime:    | System.Collections. |
| Score:            | 77.42032            |
| Mass Error [ppm]: | 0.32502             |
| PEP:              | 0.0050706           |
| Precursor Type:   | MULTI               |

| b ion      |              |    |     |    | y ion        |            | y <sup>2+</sup> ion |            |
|------------|--------------|----|-----|----|--------------|------------|---------------------|------------|
| Δ dalton   | mass         |    | seq |    | Δ dalton     | mass       | Δ dalton            | mass       |
|            | 129.06585398 | 1  | Q   | 16 |              |            |                     |            |
|            | 242.14991796 | 2  | I   | 15 | 1806.8574615 |            | 903.93236898        | -0.0058553 |
| +0.1134084 | 299.17138168 | 3  | G   | 14 | 1693.7733975 |            | 847.39033699        | +0.3473949 |
|            | 412.25544566 | 4  | I   | 13 | 1636.7519338 |            | 1636.7519338        |            |
|            | 549.31435752 | 5  | H   | 12 | 1523.6678698 |            | 762.33757314        | +0.0308961 |
|            | 664.34130056 | 6  | D   | 11 | 1386.6089579 | +0.0609639 | 1386.6089579        |            |
|            | 779.36824359 | 7  | D   | 10 | 1271.5820149 |            | 1271.5820149        |            |
|            | 926.43665751 | 8  | F   | 9  | 1156.5550719 |            | 1156.5550719        |            |
|            | 1073.5050714 | 9  | F   | 8  | 1009.486658  | +0.0155393 | 505.24696721        | +0.0948297 |
| +0.1125999 | 1144.5421852 | 10 | A   | 7  | 862.41824405 | +0.1568902 | 862.41824405        |            |
| +0.0550252 | 1257.6262492 | 11 | I   | 6  | 791.38113026 |            | 396.19420336        | +0.1142073 |
|            | 1314.6477129 | 12 | G   | 5  | 678.29706628 | -0.1518026 | 678.29706628        |            |
|            | 1371.6691766 | 13 | G   | 4  | 621.27560256 | -0.4712202 | 621.27560256        |            |
|            | 1508.7280885 | 14 | H   | 3  | 564.25413883 | -0.2619513 | 564.25413883        |            |
|            | 1675.7264473 | 15 | S   | 2  | 427.19522697 |            | 427.19522697        |            |
|            | 1788.8105113 | 16 | I   | 1  | 260.19686815 | +0.0054634 | 260.19686815        |            |
|            |              | 17 | K   | 0  | 147.11280417 |            | 147.11280417        |            |

**general information**

|                       |              |
|-----------------------|--------------|
| Annotation:           | 13 of 17     |
| AminoAcids Coverag    | 76 %         |
| Intensity Coverage:   | 51 %         |
| Protein Localisation: | 989 ... 1005 |



Source: 201 20325\_VR\_Bsu\_TripleSILAC\_pL2ESLSrep\_F16  
 Scannumber: 10208  
 Protein: BSU23470; spollAA  
 Peptide Score: 156.29  
 Method: ITMS; CID; 3

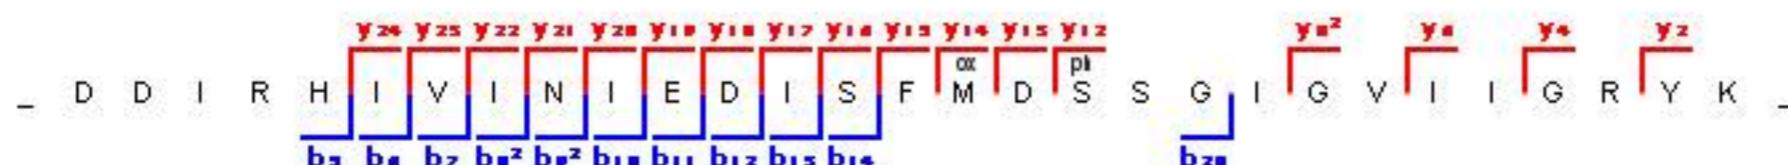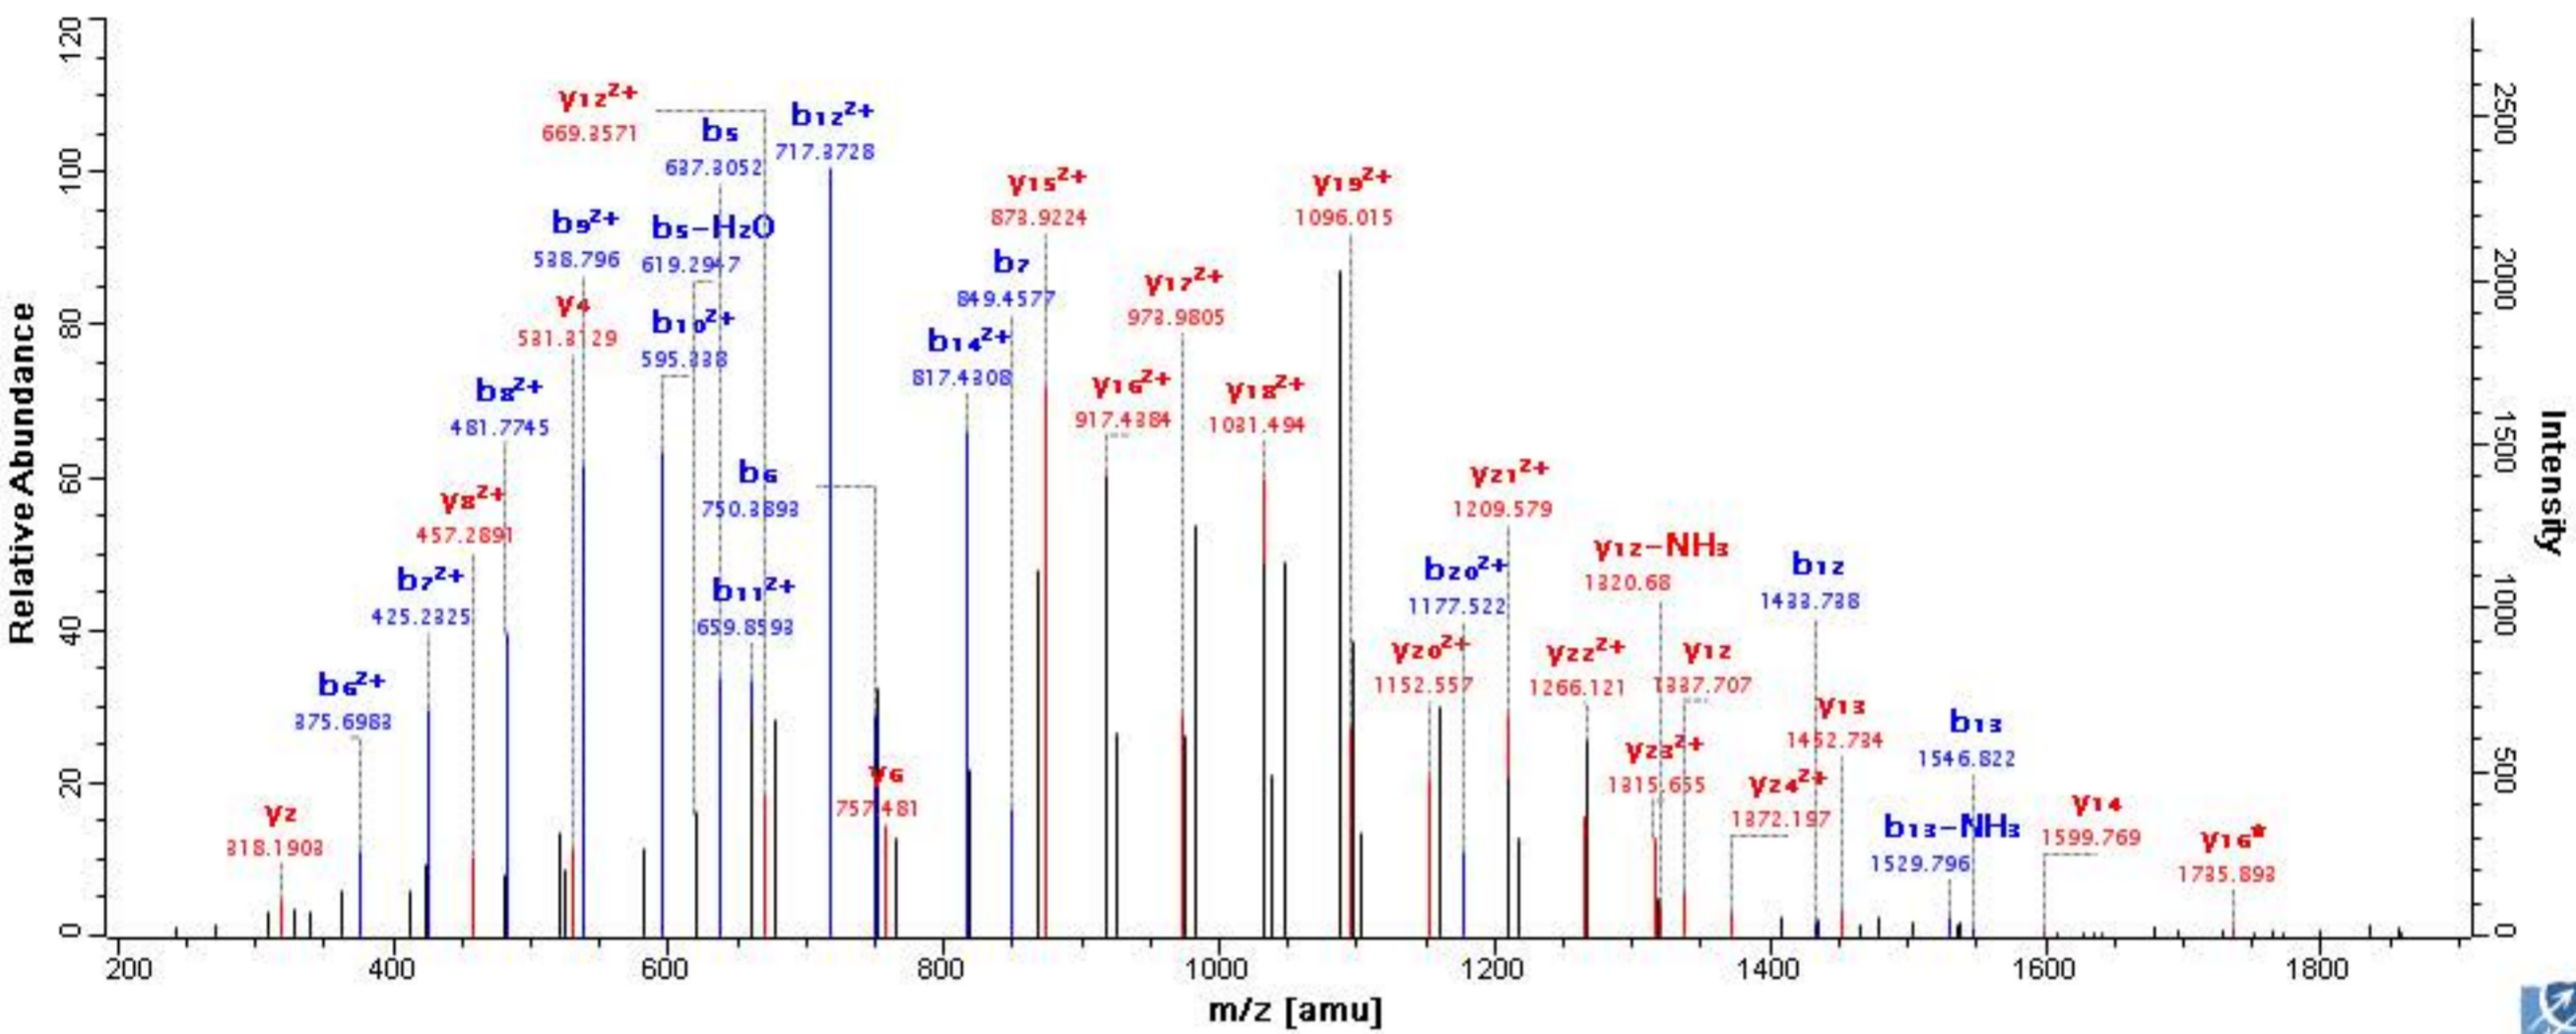

precursor information

|                   |                     |
|-------------------|---------------------|
| Mass:             | 3378.67644          |
| m/z:              | System.Collections. |
| Charge:           | System.Collections. |
| Retentiontime:    | System.Collections. |
| Score:            | 156.2934            |
| Mass Error [ppm]: | -0.29749            |
| PEP:              | 4.2245E-45          |
| Precursor Type:   | ISO                 |

| b <sup>2+</sup> ion |          | b ion     |          | seq |   | γ ion    |          | γ <sup>2+</sup> ion |                    |
|---------------------|----------|-----------|----------|-----|---|----------|----------|---------------------|--------------------|
| Δ dalton            | mass     | Δ dalton  | mass     |     |   | Δ dalton | mass     | Δ dalton            | mass               |
|                     | 116.0342 |           | 116.0342 | 1   | D | 28       |          |                     |                    |
|                     | 231.0612 |           | 231.0612 | 2   | D | 27       | 3264.658 |                     | 3264.658           |
|                     | 344.1452 |           | 344.1452 | 3   | I | 26       | 3149.631 |                     | 3149.631           |
|                     | 500.2463 |           | 500.2463 | 4   | R | 25       | 3036.547 |                     | 3036.547           |
|                     | 637.3052 | +0.027575 | 637.3052 | 5   | H | 24       | 2880.446 |                     | 2880.446           |
| +0.25599            | 375.6983 | +0.032379 | 750.3893 | 6   | I | 23       | 2743.387 |                     | 1372.197 +0.142589 |
| +0.199749           | 425.2325 | -0.178675 | 849.4577 | 7   | V | 22       | 2630.303 |                     | 1315.655 +0.379323 |
| +0.218203           | 481.7745 |           | 962.5418 | 8   | I | 21       | 2531.234 |                     | 1266.121 -0.158491 |
| +0.282372           | 538.796  |           | 1076.585 | 9   | N | 20       | 2418.15  |                     | 1209.579 -0.048466 |
| +0.190596           | 595.338  |           | 1189.669 | 10  | I | 19       | 2304.107 |                     | 1152.557 -0.128565 |
| +0.109241           | 659.8593 |           | 1318.711 | 11  | E | 18       | 2191.023 |                     | 1096.015 -0.078476 |
| +0.317205           | 717.3728 | -0.247596 | 1433.738 | 12  | D | 17       | 2061.981 |                     | 1031.494 +0.046336 |
|                     | 1546.822 | +0.216436 | 1546.822 | 13  | I | 16       | 1946.954 |                     | 973.9805 -0.12458  |
| -0.177182           | 817.4308 |           | 1633.854 | 14  | S | 15       | 1833.87  |                     | 917.4384 -0.017729 |
|                     | 1780.923 |           | 1780.923 | 15  | F | 14       | 1746.838 |                     | 873.9224 +0.265681 |
|                     | 1927.958 |           | 1927.958 | 16  | M | 13       | 1599.769 | +0.171993           | 1599.769           |
|                     | 2042.985 |           | 2042.985 | 17  | D | 12       | 1452.734 | -0.431402           | 1452.734           |
|                     | 2209.984 |           | 2209.984 | 18  | S | 11       | 1337.707 | +0.089804           | 669.3571 +0.479862 |
|                     | 2297.016 |           | 2297.016 | 19  | S | 10       | 1170.708 |                     | 1170.708           |
| +0.269967           | 1177.522 |           | 2354.037 | 20  | G | 9        | 1083.676 |                     | 1083.676           |
|                     | 2467.121 |           | 2467.121 | 21  | I | 8        | 1026.655 |                     | 1026.655           |
|                     | 2524.143 |           | 2524.143 | 22  | G | 7        | 913.5709 |                     | 457.2891 +0.128569 |
|                     | 2623.211 |           | 2623.211 | 23  | V | 6        | 856.5494 |                     | 856.5494           |
|                     | 2736.295 |           | 2736.295 | 24  | I | 5        | 757.481  | -0.118791           | 757.481            |
|                     | 2849.379 |           | 2849.379 | 25  | I | 4        | 644.397  |                     | 644.397            |
|                     | 2906.401 |           | 2906.401 | 26  | G | 3        | 531.3129 | +0.146627           | 531.3129           |
|                     | 3062.502 |           | 3062.502 | 27  | R | 2        | 474.2914 |                     | 474.2914           |
|                     | 3225.565 |           | 3225.565 | 28  | Y | 1        | 318.1903 | +0.234656           | 318.1903           |
|                     |          |           |          | 29  | K | 0        | 155.127  |                     | 155.127            |

general information

|                       |           |
|-----------------------|-----------|
| Annotation:           | 21 of 29  |
| AminoAcids Coverag    | 72 %      |
| Intensity Coverage:   | 51 %      |
| Protein Localisation: | 41 ... 69 |

Source: 20120325\_VR\_Bsu\_TripleSILAC\_pL2ESLRep\_F17  
 Scannumber: 5924  
 Protein: BSU06200; ydjH  
 Peptide Score: 160.67  
 Method: ITMS; CID; 3

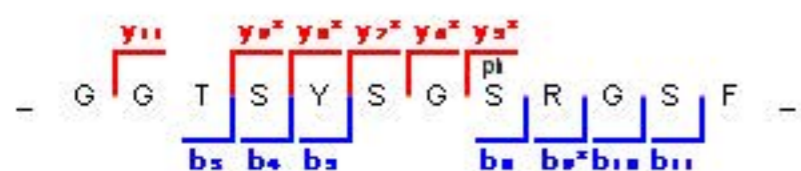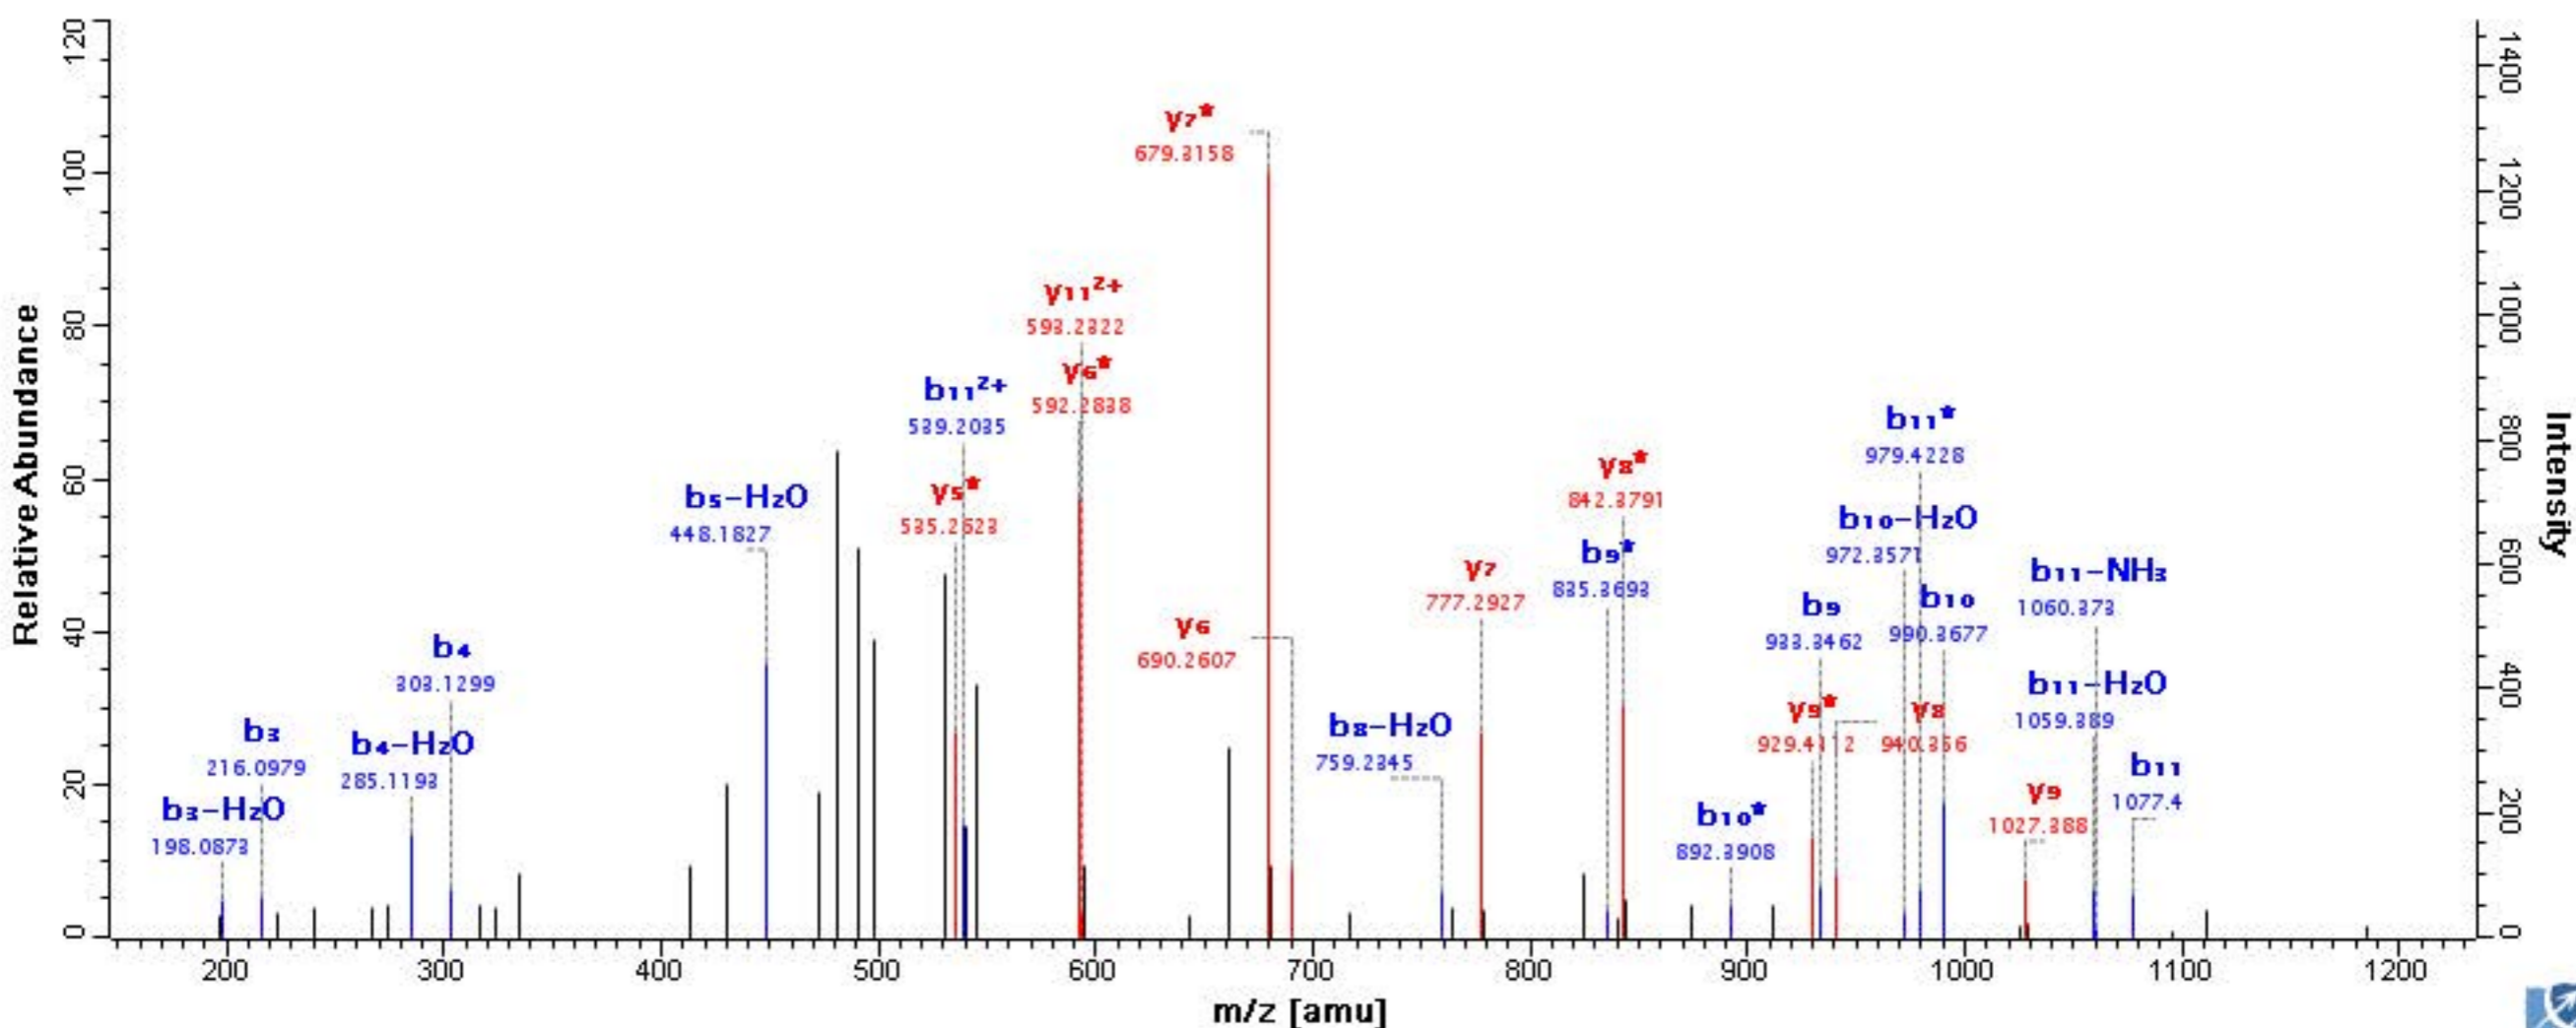

#### precursor information

|                   |                     |
|-------------------|---------------------|
| Mass:             | 1241.47132          |
| m/z:              | System.Collections. |
| Charge:           | System.Collections. |
| Retentiontime:    | System.Collections. |
| Score:            | 160.6748            |
| Mass Error [ppm]: | -0.064566           |
| PEP:              | 5.8138E-23          |
| Precursor Type:   | ISO                 |

#### general information

|                       |             |
|-----------------------|-------------|
| Annotation:           | 10 of 12    |
| AminoAcids Coverag    | 83 %        |
| Intensity Coverage:   | 50 %        |
| Protein Localisation: | 243 ... 254 |

| b <sup>2+</sup> ion |          | b ion     |          |    | seq |    | γ ion    |           | γ <sup>2+</sup> ion |          |
|---------------------|----------|-----------|----------|----|-----|----|----------|-----------|---------------------|----------|
| Δ dalton            | mass     | Δ dalton  | mass     |    |     |    | Δ dalton | mass      | Δ dalton            | mass     |
|                     | 58.02874 |           | 58.02874 | 1  | G   | 11 |          |           |                     |          |
|                     | 115.0502 |           | 115.0502 | 2  | G   | 10 | 1185.457 |           | 593.2322            | +0.14172 |
|                     | 216.0979 | +0.096454 | 216.0979 | 3  | T   | 9  | 1128.436 |           | 1128.436            |          |
|                     | 303.1299 | +0.035586 | 303.1299 | 4  | S   | 8  | 1027.388 | +0.021968 | 1027.388            |          |
|                     | 466.1932 |           | 466.1932 | 5  | Y   | 7  | 940.356  | +0.158428 | 940.356             |          |
|                     | 553.2253 |           | 553.2253 | 6  | S   | 6  | 777.2927 | +0.168228 | 777.2927            |          |
|                     | 610.2467 |           | 610.2467 | 7  | G   | 5  | 690.2607 | -0.103271 | 690.2607            |          |
|                     | 777.2451 |           | 777.2451 | 8  | S   | 4  | 633.2392 |           | 633.2392            |          |
|                     | 933.3462 | -0.00117  | 933.3462 | 9  | R   | 3  | 466.2409 |           | 466.2409            |          |
|                     | 990.3677 | +0.047313 | 990.3677 | 10 | G   | 2  | 310.1397 |           | 310.1397            |          |
| +0.094794           | 539.2035 | -0.023107 | 1077.4   | 11 | S   | 1  | 253.1183 |           | 253.1183            |          |
|                     |          |           |          | 12 | F   | 0  | 166.0863 |           | 166.0863            |          |

Source: 20120325\_VR\_Bsu\_TripleSILAC\_pL2ESLRep\_F19  
 Scannumber: 2812  
 Protein: BSU01230; rplP  
 Peptide Score: 170.89  
 Method: ITMS; CID; 3

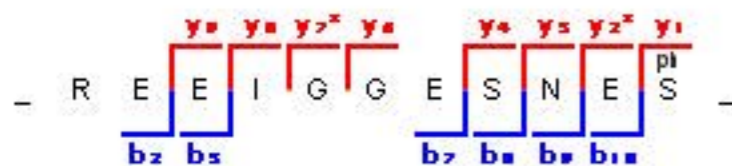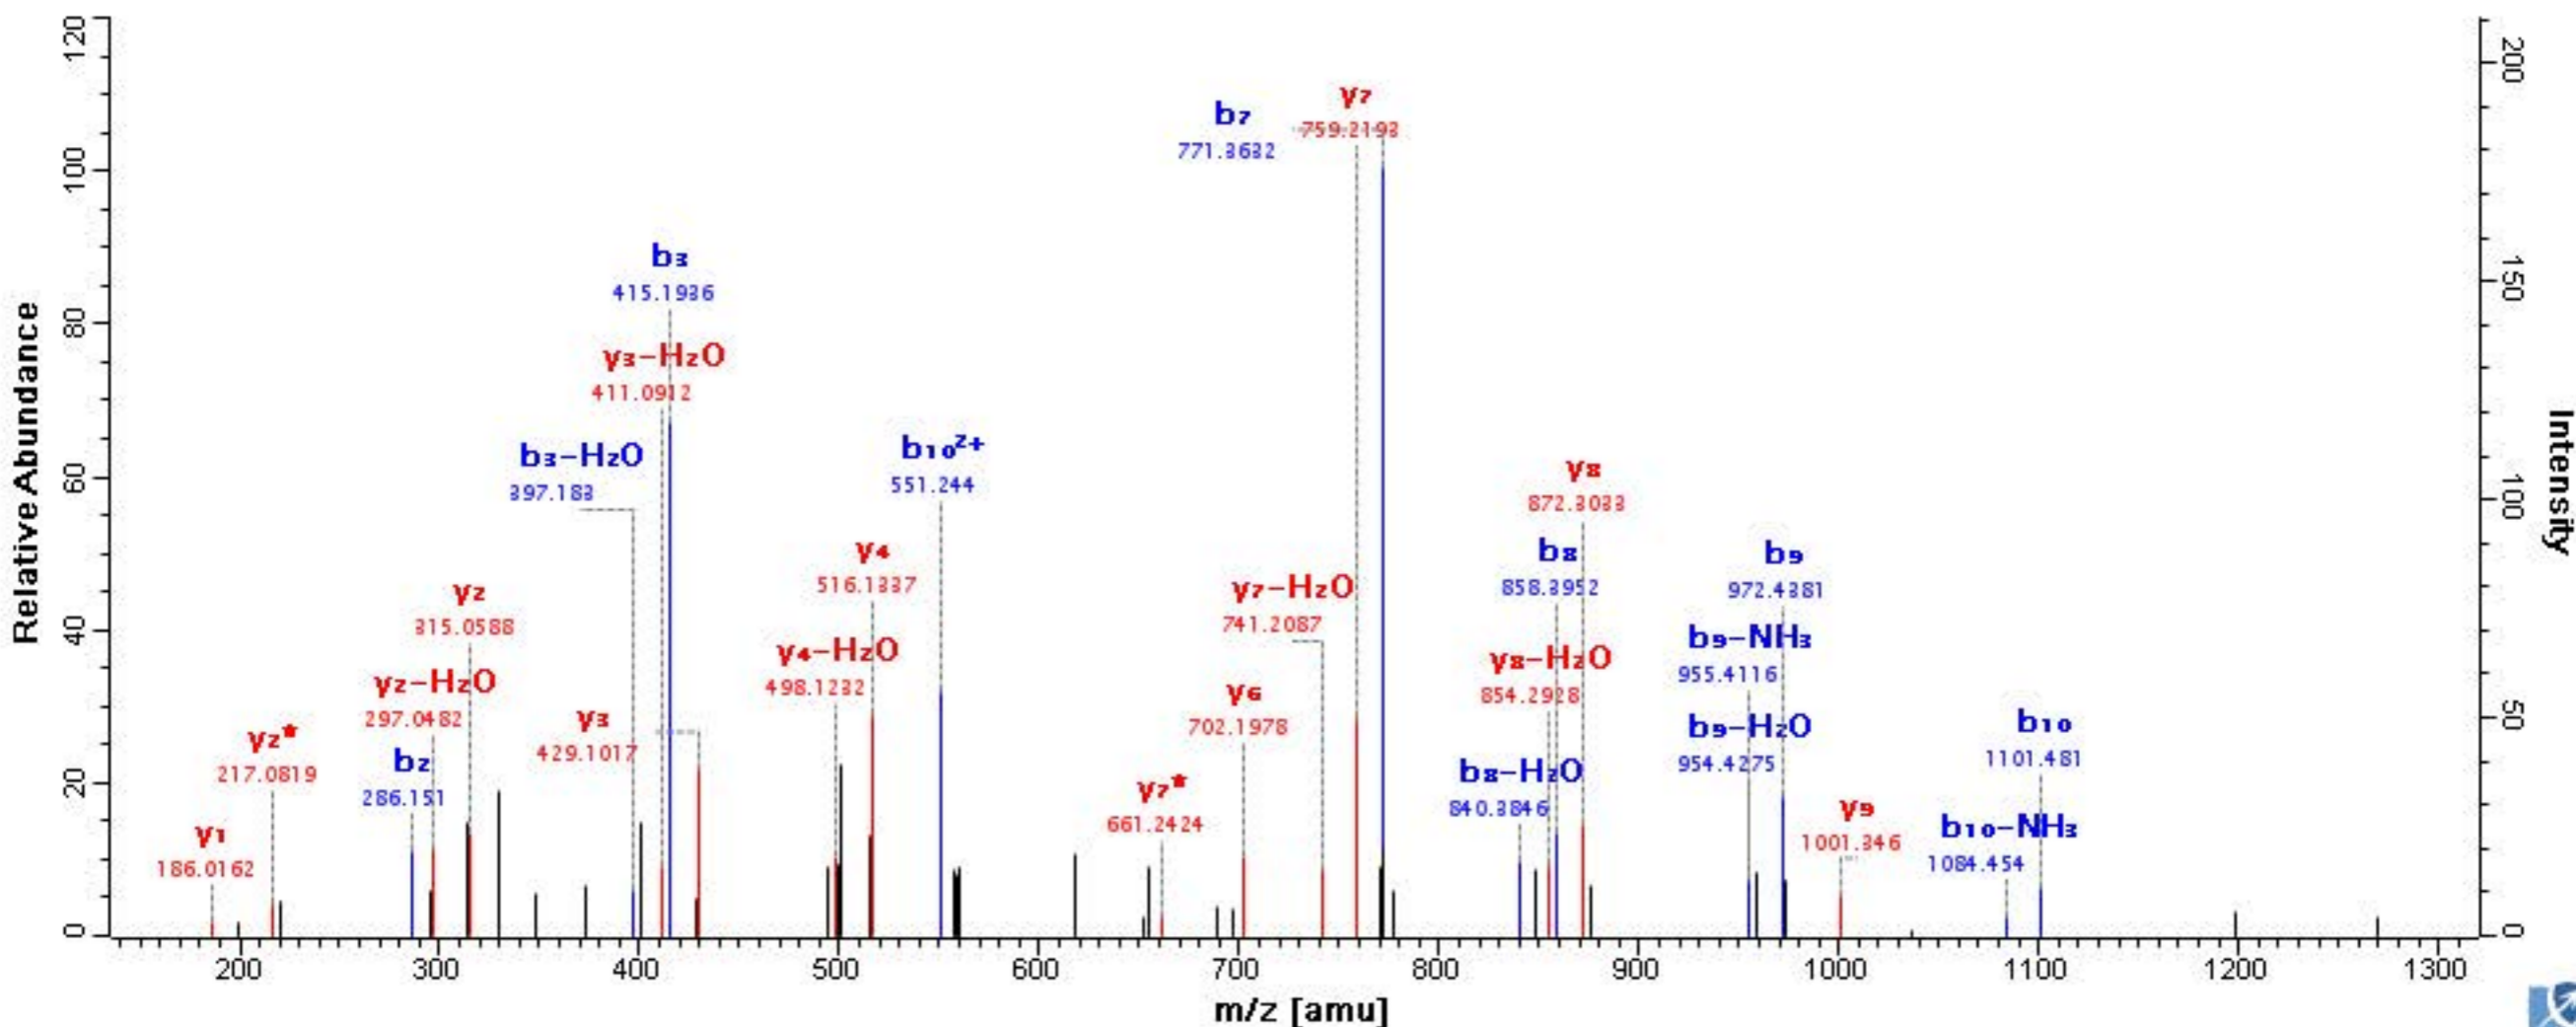

precursor information

|                   |                     |
|-------------------|---------------------|
| Mass:             | 1285.48226          |
| m/z:              | System.Collections. |
| Charge:           | System.Collections. |
| Retentiontime:    | System.Collections. |
| Score:            | 170.8887            |
| Mass Error [ppm]: | -0.071609           |
| PEP:              | 3.0967E-33          |
| Precursor Type:   | ISO                 |

general information

|                       |             |
|-----------------------|-------------|
| Annotation:           | 10 of 11    |
| AminoAcids Coverage:  | 91 %        |
| Intensity Coverage:   | 65 %        |
| Protein Localisation: | 134 ... 144 |

| b <sup>2+</sup> ion |              | b ion      |              |    |     |    | y ion        |            |
|---------------------|--------------|------------|--------------|----|-----|----|--------------|------------|
| Δ dalton            | mass         | Δ dalton   | mass         |    | seq |    | Δ dalton     | mass       |
|                     | 157.10838749 |            | 157.10838749 | 1  | R   | 10 |              |            |
|                     | 286.15098059 | +0.0351156 | 286.15098059 | 2  | E   | 9  | 1130.3885196 |            |
|                     | 415.19357369 | +0.0071709 | 415.19357369 | 3  | E   | 8  | 1001.3459265 | -0.3282874 |
|                     | 528.27763767 |            | 528.27763767 | 4  | I   | 7  | 872.30333345 | -0.000538  |
|                     | 585.29910139 |            | 585.29910139 | 5  | G   | 6  | 759.21926947 | +0.0076592 |
|                     | 642.32056511 |            | 642.32056511 | 6  | G   | 5  | 702.19780574 | +0.0200287 |
|                     | 771.36315821 | -0.039855  | 771.36315821 | 7  | E   | 4  | 645.17634202 |            |
|                     | 858.39518662 | +0.0894936 | 858.39518662 | 8  | S   | 3  | 516.13374892 | -0.0720424 |
|                     | 972.43811407 | -0.1162757 | 972.43811407 | 9  | N   | 2  | 429.10172051 | +0.1689704 |
| +0.0481224          | 551.24399182 | -0.0025578 | 1101.4807072 | 10 | E   | 1  | 315.05879307 | +0.1258993 |
|                     |              |            |              | 11 | S   | 0  | 186.01619997 | +0.1314746 |

Source: 20120325\_VR\_Bsu\_TripleSILAC\_pL2ESLrep\_F21  
 Scannumber: 4471  
 Protein: BSU28290; ilvC  
 Peptide Score: 118.71  
 Method: ITMS; CID; 3

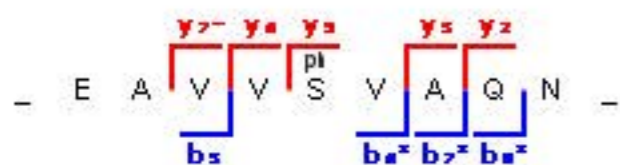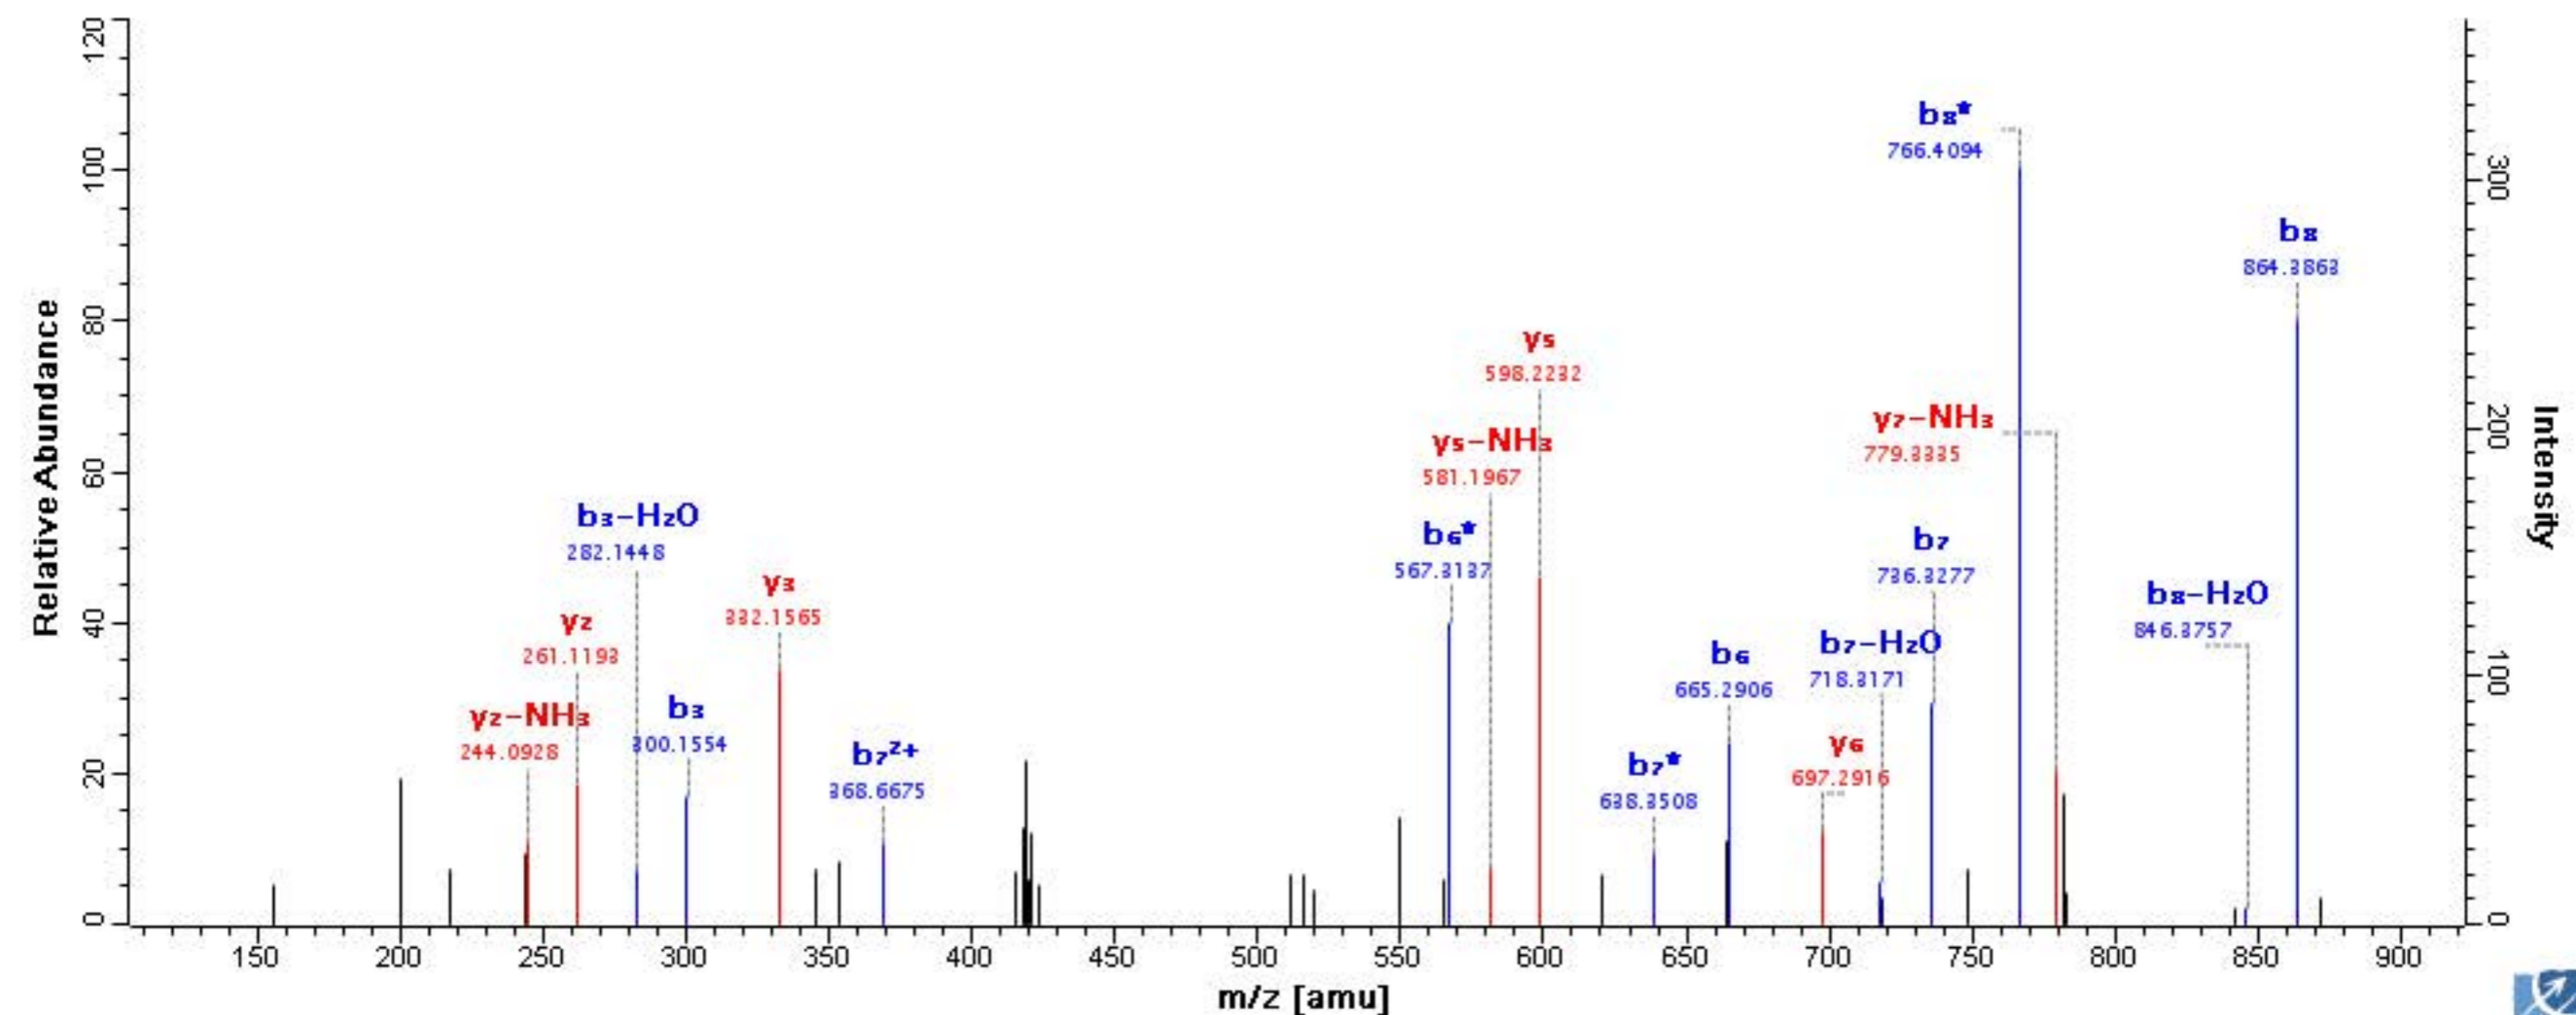

#### precursor information

|                       |                     |
|-----------------------|---------------------|
| Mass:                 | 995.43253           |
| m/z:                  | System.Collections. |
| Charge:               | System.Collections. |
| Retentiontime:        | System.Collections. |
| Score:                | 118.7116            |
| Mass Error [ppm]:     | 0.0391              |
| PEP:                  | 1.7967E-05          |
| g Precursor Type:     | ISO                 |
| Annotation:           | 6 of 9              |
| AminoAcids Coverag    | 67 %                |
| Intensity Coverage:   | 69 %                |
| Protein Localisation: | 334 ... 342         |

| b <sup>2+</sup> ion |              | b ion      |              |     | y ion |          |                         |
|---------------------|--------------|------------|--------------|-----|-------|----------|-------------------------|
| Δ dalton            | mass         | Δ dalton   | mass         | seq |       | Δ dalton | mass                    |
|                     | 130.04986956 |            | 130.04986956 | 1   | E     | 8        |                         |
|                     | 201.08698335 |            | 201.08698335 | 2   | A     | 7        | 867.39717425            |
|                     | 300.15539727 | -0.0854815 | 300.15539727 | 3   | V     | 6        | 796.36006047            |
|                     | 399.22381118 |            | 399.22381118 | 4   | V     | 5        | 697.29164655 +0.0143227 |
|                     | 566.22217    |            | 566.22217    | 5   | S     | 4        | 598.22323263 +0.0780979 |
|                     | 665.29058392 | +0.0282027 | 665.29058392 | 6   | V     | 3        | 431.22487382            |
| -0.2304143          | 368.66748709 | -0.0485229 | 736.32769771 | 7   | A     | 2        | 332.1564599 +0.0173682  |
|                     | 864.38627522 | -0.1015462 | 864.38627522 | 8   | Q     | 1        | 261.11934611 +0.0546956 |
|                     |              |            |              | 9   | N     | 0        | 133.0607686             |

Source: 20120508\_VR\_Bsu\_TripleSILACrep1\_pT1L1T2\_F01  
 Scannumber: 9028  
 Protein: BSU18849; yozV  
 Peptide Score: 150.46  
 Method: ITMS; CID; 3

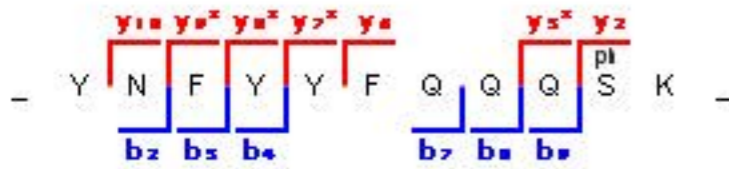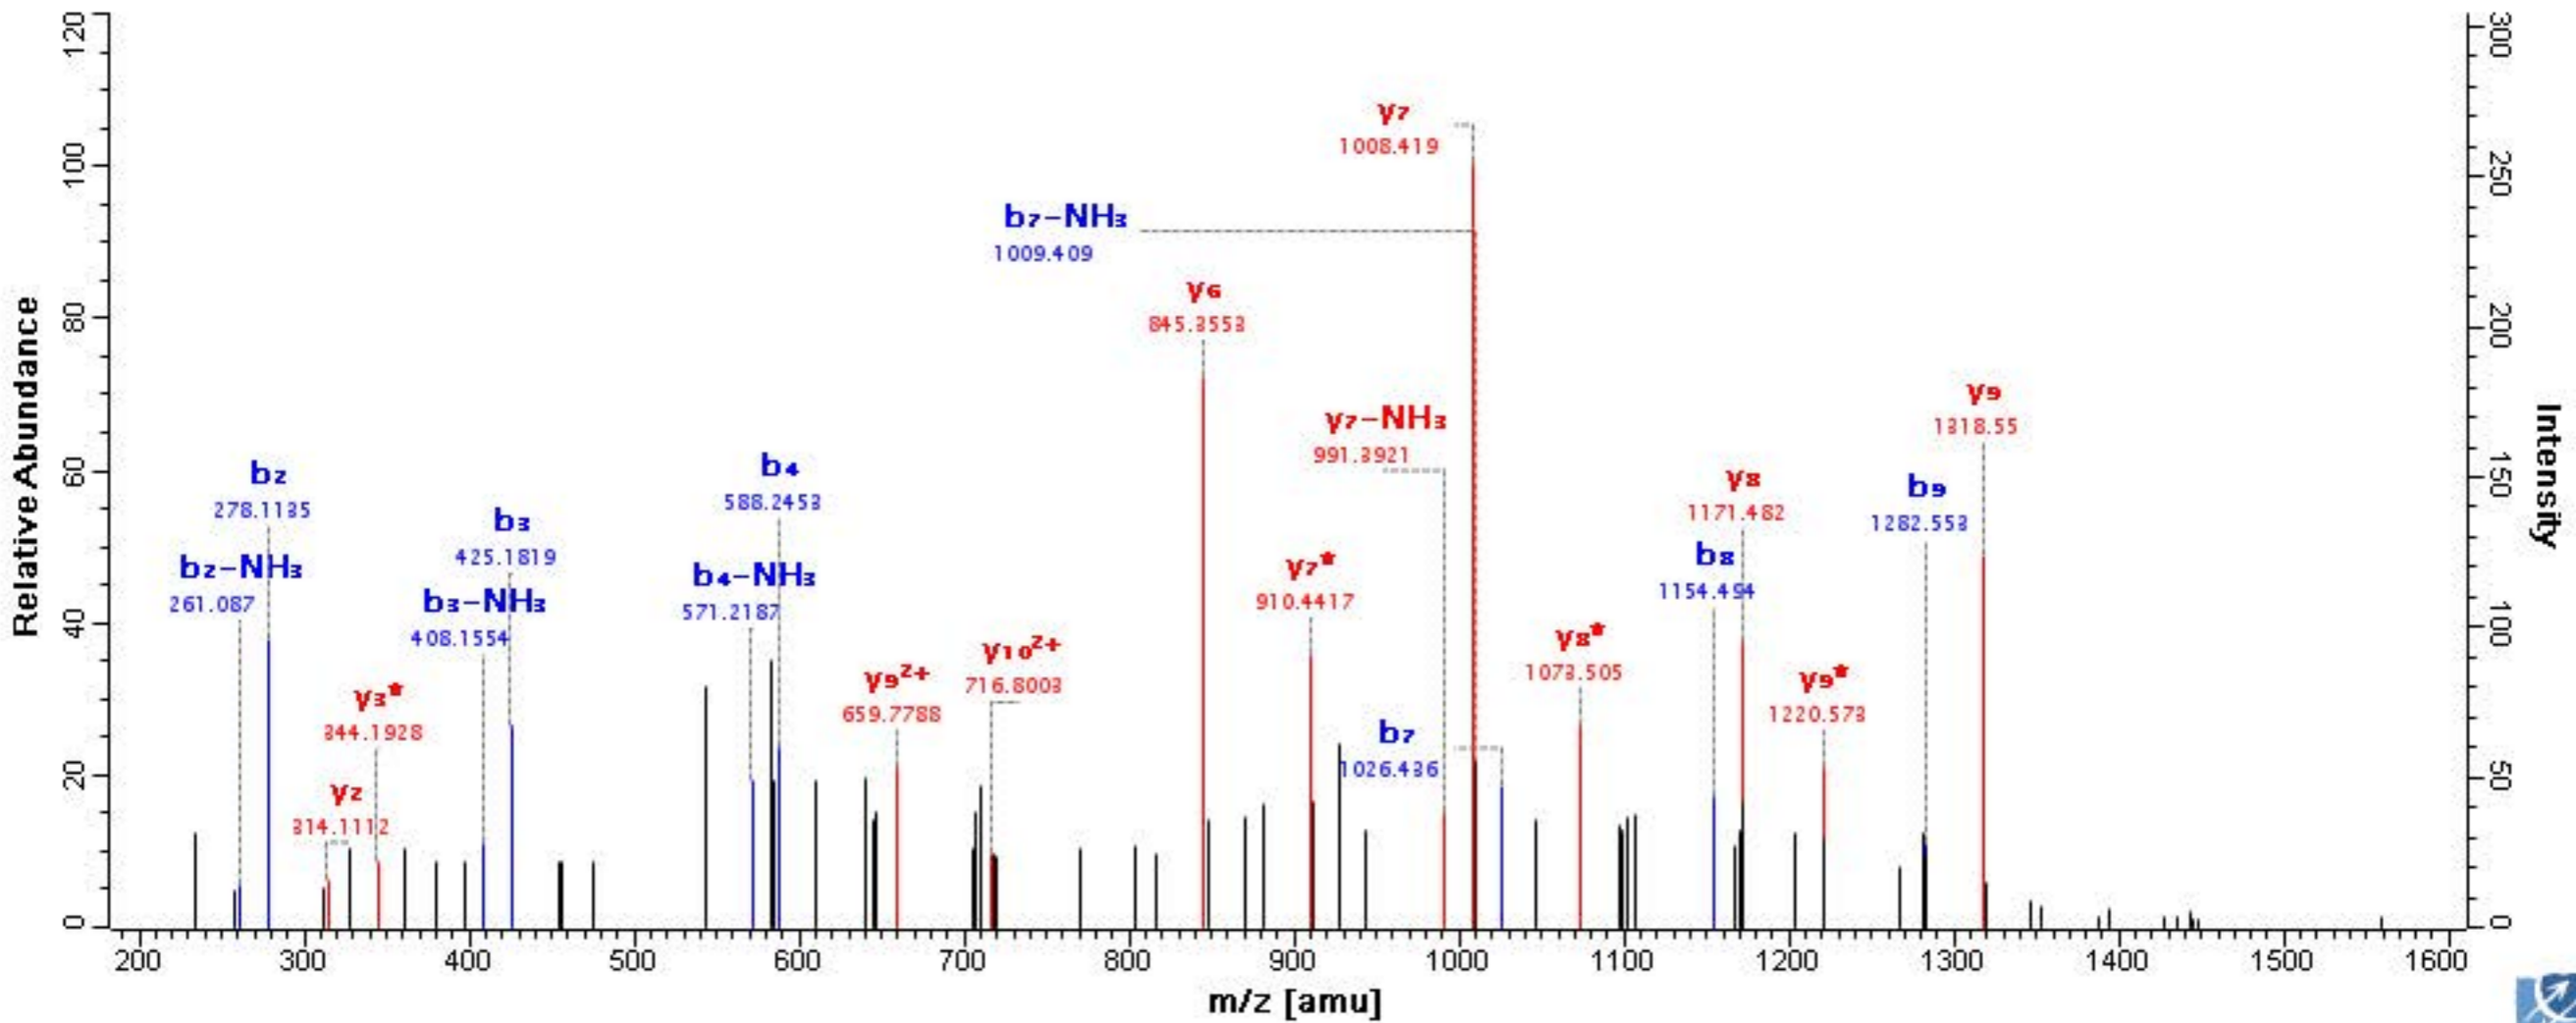

**precursor information**

|                   |                     |
|-------------------|---------------------|
| Mass:             | 1594.64966          |
| m/z:              | System.Collections. |
| Charge:           | System.Collections. |
| Retentiontime:    | System.Collections. |
| Score:            | 150.4568            |
| Mass Error [ppm]: | 0.1857              |
| PEP:              | 7.0362E-16          |
| Precursor Type:   | MULTI               |

**general information**

|                       |           |
|-----------------------|-----------|
| Annotation:           | 9 of 11   |
| AminoAcids Coverage:  | 82 %      |
| Intensity Coverage:   | 47 %      |
| Protein Localisation: | 68 ... 78 |

| b ion      |              |    |     |    | y ion        |            | y <sup>2+</sup> ion |            |
|------------|--------------|----|-----|----|--------------|------------|---------------------|------------|
| Δ dalton   | mass         |    | seq |    | Δ dalton     | mass       | Δ dalton            | mass       |
|            | 164.070605   | 1  | Y   | 10 |              |            |                     |            |
| +0.0415884 | 278.11353245 | 2  | N   | 9  | 1432.5933079 |            | 716.80029217        | -0.4257194 |
| +0.0845942 | 425.18194637 | 3  | F   | 8  | 1318.5503804 | +0.0716899 | 659.77882845        | +0.0648605 |
| -0.0373281 | 588.24527491 | 4  | Y   | 7  | 1171.4819665 | +0.1667151 | 1171.4819665        |            |
|            | 751.30860344 | 5  | Y   | 6  | 1008.418638  | -0.0743387 | 1008.418638         |            |
|            | 898.37701736 | 6  | F   | 5  | 845.35530944 | +0.0841437 | 845.35530944        |            |
| +0.1042    | 1026.4355949 | 7  | Q   | 4  | 698.28689552 |            | 698.28689552        |            |
| +0.0590503 | 1154.4941724 | 8  | Q   | 3  | 570.22831801 |            | 570.22831801        |            |
| +0.0192716 | 1282.5527499 | 9  | Q   | 2  | 442.1697405  |            | 442.1697405         |            |
|            | 1449.5511087 | 10 | S   | 1  | 314.11116299 | +0.1103946 | 314.11116299        |            |
|            |              | 11 | K   | 0  | 147.11280417 |            | 147.11280417        |            |

Source: 20120508\_VR\_Bsu\_TripleSILACrep1\_pT1 L1 T2\_F01  
 Scannumber: 9723  
 Protein: asp5; BSU27550  
 Peptide Score: 89.56  
 Method: ITMS; CID; 3

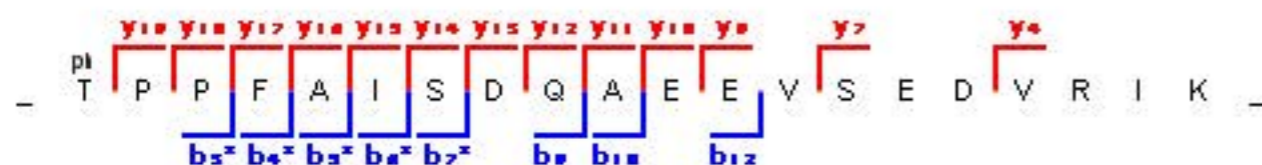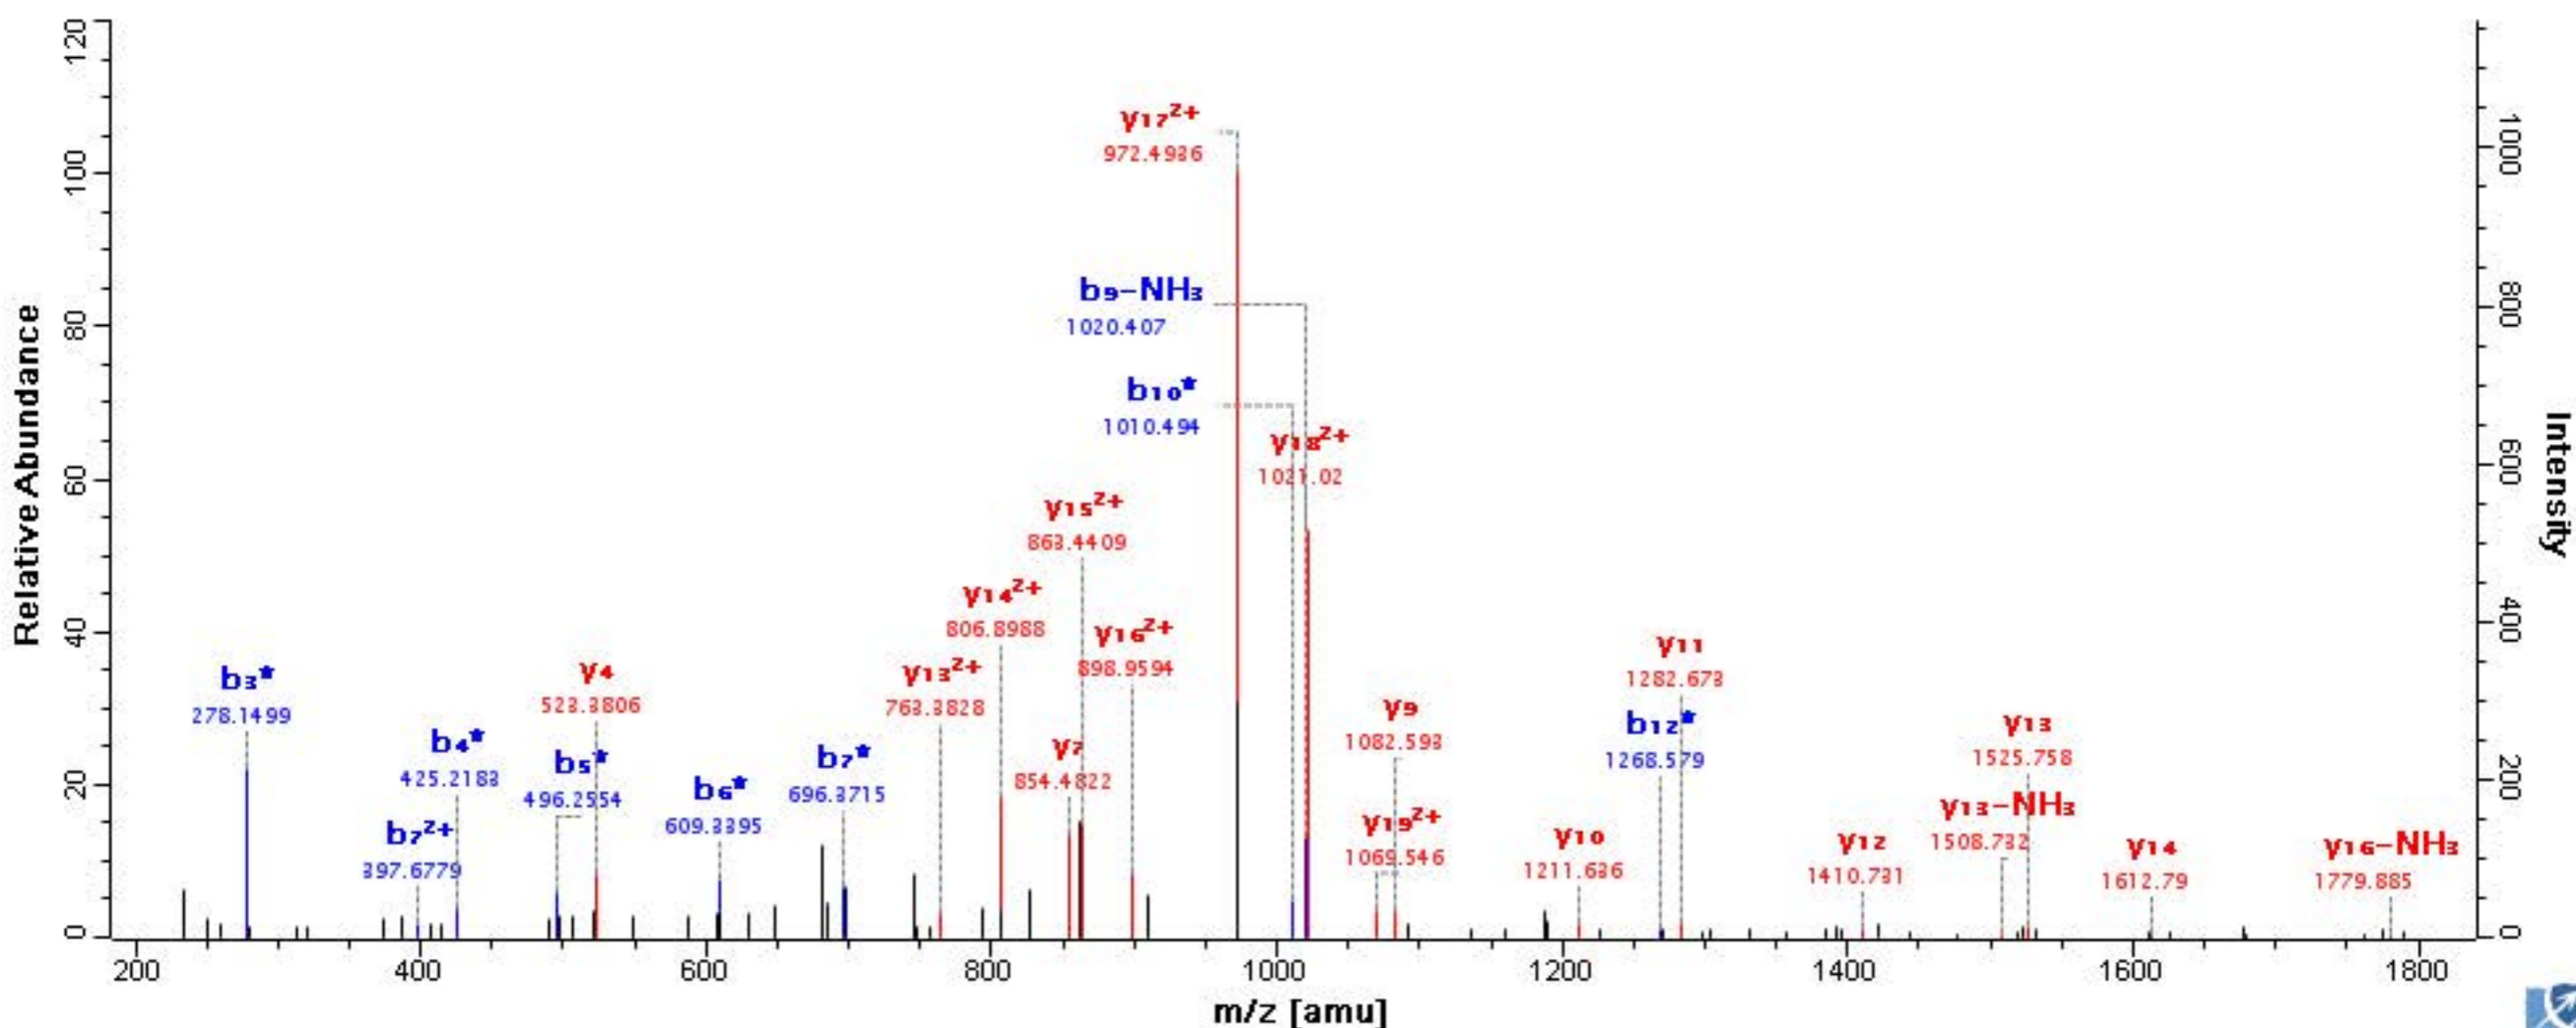

**precursor information**

|                   |                     |
|-------------------|---------------------|
| Mass:             | 2310.07717          |
| m/z:              | System.Collections. |
| Charge:           | System.Collections. |
| Retentiontime:    | System.Collections. |
| Score:            | 89.55674            |
| Mass Error [ppm]: | -0.38958            |
| PEP:              | 2.9867E-06          |
| Precursor Type:   | MULTI               |

**general information**

|                       |             |
|-----------------------|-------------|
| Annotation:           | 15 of 20    |
| AminoAcids Coverag    | 75 %        |
| Intensity Coverage:   | 56 %        |
| Protein Localisation: | 110 ... 129 |

| b <sup>2+</sup> ion |          | b ion    |          |    |     |    | γ ion    |           | γ <sup>2+</sup> ion |           |
|---------------------|----------|----------|----------|----|-----|----|----------|-----------|---------------------|-----------|
| Δ dalton            | mass     | Δ dalton | mass     |    | seq |    | Δ dalton | mass      | Δ dalton            | mass      |
|                     | 182.0213 |          | 182.0213 | 1  | T   | 19 |          |           |                     |           |
|                     | 279.074  |          | 279.074  | 2  | P   | 18 | 2138.086 |           | 1069.546            | +0.08201  |
|                     | 376.1268 |          | 376.1268 | 3  | P   | 17 | 2041.033 |           | 1021.02             | +0.337823 |
|                     | 523.1952 |          | 523.1952 | 4  | F   | 16 | 1943.98  |           | 972.4936            | -0.021537 |
|                     | 594.2323 |          | 594.2323 | 5  | A   | 15 | 1796.912 |           | 898.9594            | +0.150121 |
|                     | 707.3164 |          | 707.3164 | 6  | I   | 14 | 1725.874 |           | 863.4409            | +0.087074 |
| -0.195067           | 397.6779 |          | 794.3484 | 7  | S   | 13 | 1612.79  | +0.192125 | 806.8988            | -0.038679 |
|                     | 909.3754 |          | 909.3754 | 8  | D   | 12 | 1525.758 | +0.423616 | 763.3828            | +0.167032 |
|                     | 1037.434 |          | 1037.434 | 9  | Q   | 11 | 1410.731 | +0.259031 | 1410.731            |           |
|                     | 1108.471 |          | 1108.471 | 10 | A   | 10 | 1282.673 | +0.089947 | 1282.673            |           |
|                     | 1237.514 |          | 1237.514 | 11 | E   | 9  | 1211.636 | -0.174331 | 1211.636            |           |
|                     | 1366.556 |          | 1366.556 | 12 | E   | 8  | 1082.593 | -0.002099 | 1082.593            |           |
|                     | 1465.625 |          | 1465.625 | 13 | V   | 7  | 953.5506 |           | 953.5506            |           |
|                     | 1552.657 |          | 1552.657 | 14 | S   | 6  | 854.4822 | -0.04252  | 854.4822            |           |
|                     | 1681.699 |          | 1681.699 | 15 | E   | 5  | 767.4501 |           | 767.4501            |           |
|                     | 1796.726 |          | 1796.726 | 16 | D   | 4  | 638.4075 |           | 638.4075            |           |
|                     | 1895.795 |          | 1895.795 | 17 | V   | 3  | 523.3806 | -0.038978 | 523.3806            |           |
|                     | 2051.896 |          | 2051.896 | 18 | R   | 2  | 424.3122 |           | 424.3122            |           |
|                     | 2164.98  |          | 2164.98  | 19 | I   | 1  | 268.2111 |           | 268.2111            |           |
|                     |          |          |          | 20 | K   | 0  | 155.127  |           | 155.127             |           |

Source: 20120508\_VR\_Bsu\_TripleSILACrep1\_pT1L1T2\_F03  
 Scannumber: 10209  
 Protein: BSU32160; yutM  
 Peptide Score: 113.59  
 Method: ITMS; CID; 3

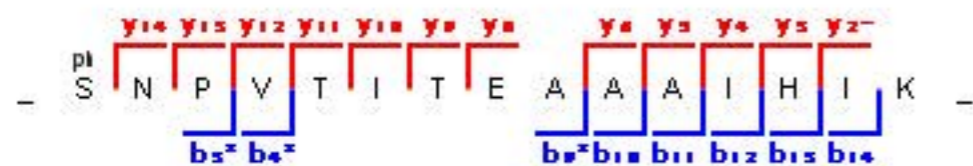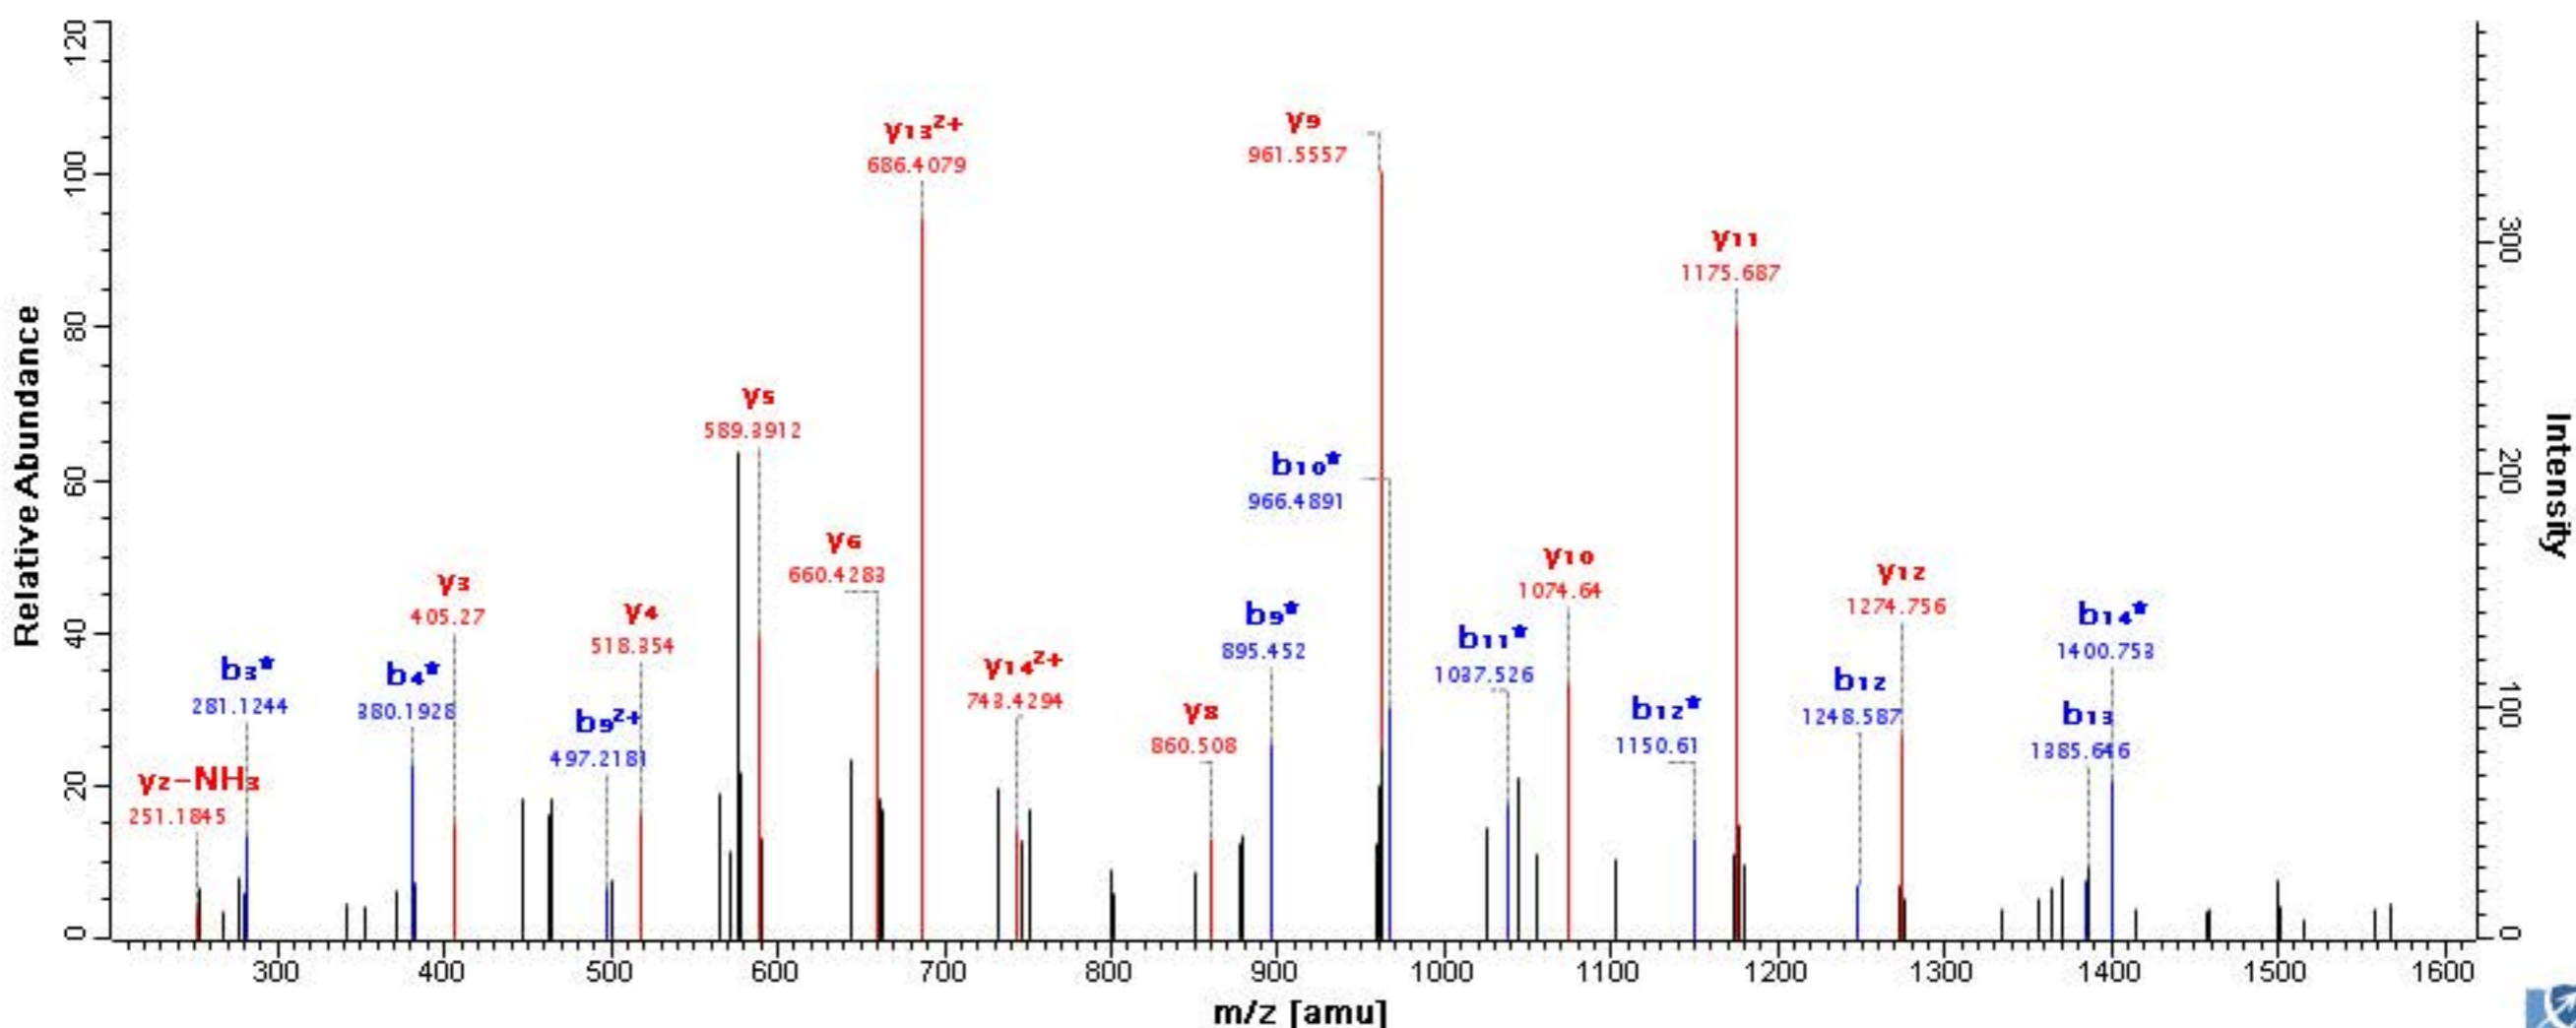

#### precursor information

|                   |                     |
|-------------------|---------------------|
| Mass:             | 1643.82886          |
| m/z:              | System.Collections. |
| Charge:           | System.Collections. |
| Retentiontime:    | System.Collections. |
| Score:            | 113.5862            |
| Mass Error [ppm]: | 0.28586             |
| PEP:              | 0.00034226          |
| Precursor Type:   | MULTI               |

| b <sup>2+</sup> ion |          | b ion     |          |     | γ ion |          | γ <sup>2+</sup> ion |           |          |           |
|---------------------|----------|-----------|----------|-----|-------|----------|---------------------|-----------|----------|-----------|
| Δ dalton            | mass     | Δ dalton  | mass     | seq |       | Δ dalton | mass                | Δ dalton  | mass     |           |
|                     | 168.0056 |           | 168.0056 | 1   | S     | 14       |                     |           |          |           |
|                     | 282.0486 |           | 282.0486 | 2   | N     | 13       | 1485.852            |           | 743.4294 | +0.001335 |
|                     | 379.1013 |           | 379.1013 | 3   | P     | 12       | 1371.809            |           | 686.4079 | +0.170016 |
|                     | 478.1697 |           | 478.1697 | 4   | V     | 11       | 1274.756            | +0.200853 | 1274.756 |           |
|                     | 579.2174 |           | 579.2174 | 5   | T     | 10       | 1175.687            | -0.113424 | 1175.687 |           |
|                     | 692.3015 |           | 692.3015 | 6   | I     | 9        | 1074.64             | +0.017385 | 1074.64  |           |
|                     | 793.3492 |           | 793.3492 | 7   | T     | 8        | 961.5557            | +0.036324 | 961.5557 |           |
|                     | 922.3918 |           | 922.3918 | 8   | E     | 7        | 860.508             | -0.000348 | 860.508  |           |
| +0.173529           | 497.2181 |           | 993.4289 | 9   | A     | 6        | 731.4654            |           | 731.4654 |           |
|                     | 1064.466 |           | 1064.466 | 10  | A     | 5        | 660.4283            | -0.001085 | 660.4283 |           |
|                     | 1135.503 |           | 1135.503 | 11  | A     | 4        | 589.3912            | +0.0143   | 589.3912 |           |
|                     | 1248.587 | -0.268434 | 1248.587 | 12  | I     | 3        | 518.354             | +0.131431 | 518.354  |           |
|                     | 1385.646 | -0.23323  | 1385.646 | 13  | H     | 2        | 405.27              | +0.064067 | 405.27   |           |
|                     | 1498.73  |           | 1498.73  | 14  | I     | 1        | 268.2111            |           | 268.2111 |           |
|                     |          |           |          | 15  | K     | 0        | 155.127             |           | 155.127  |           |

#### general information

|                       |          |
|-----------------------|----------|
| Annotation:           | 13 of 15 |
| AminoAcids Coverag    | 87 %     |
| Intensity Coverage:   | 48 %     |
| Protein Localisation: | 2 ... 16 |

Source: 20120508\_VR\_Bsu\_TripleSILACrep1\_pT1L1T2\_F03  
 Scannumber: 11086  
 Protein: BSU13200; rsbRB; ykoB  
 Peptide Score: 297.45  
 Method: ITMS; CID; 3

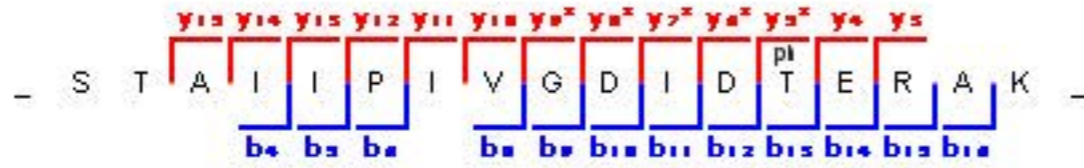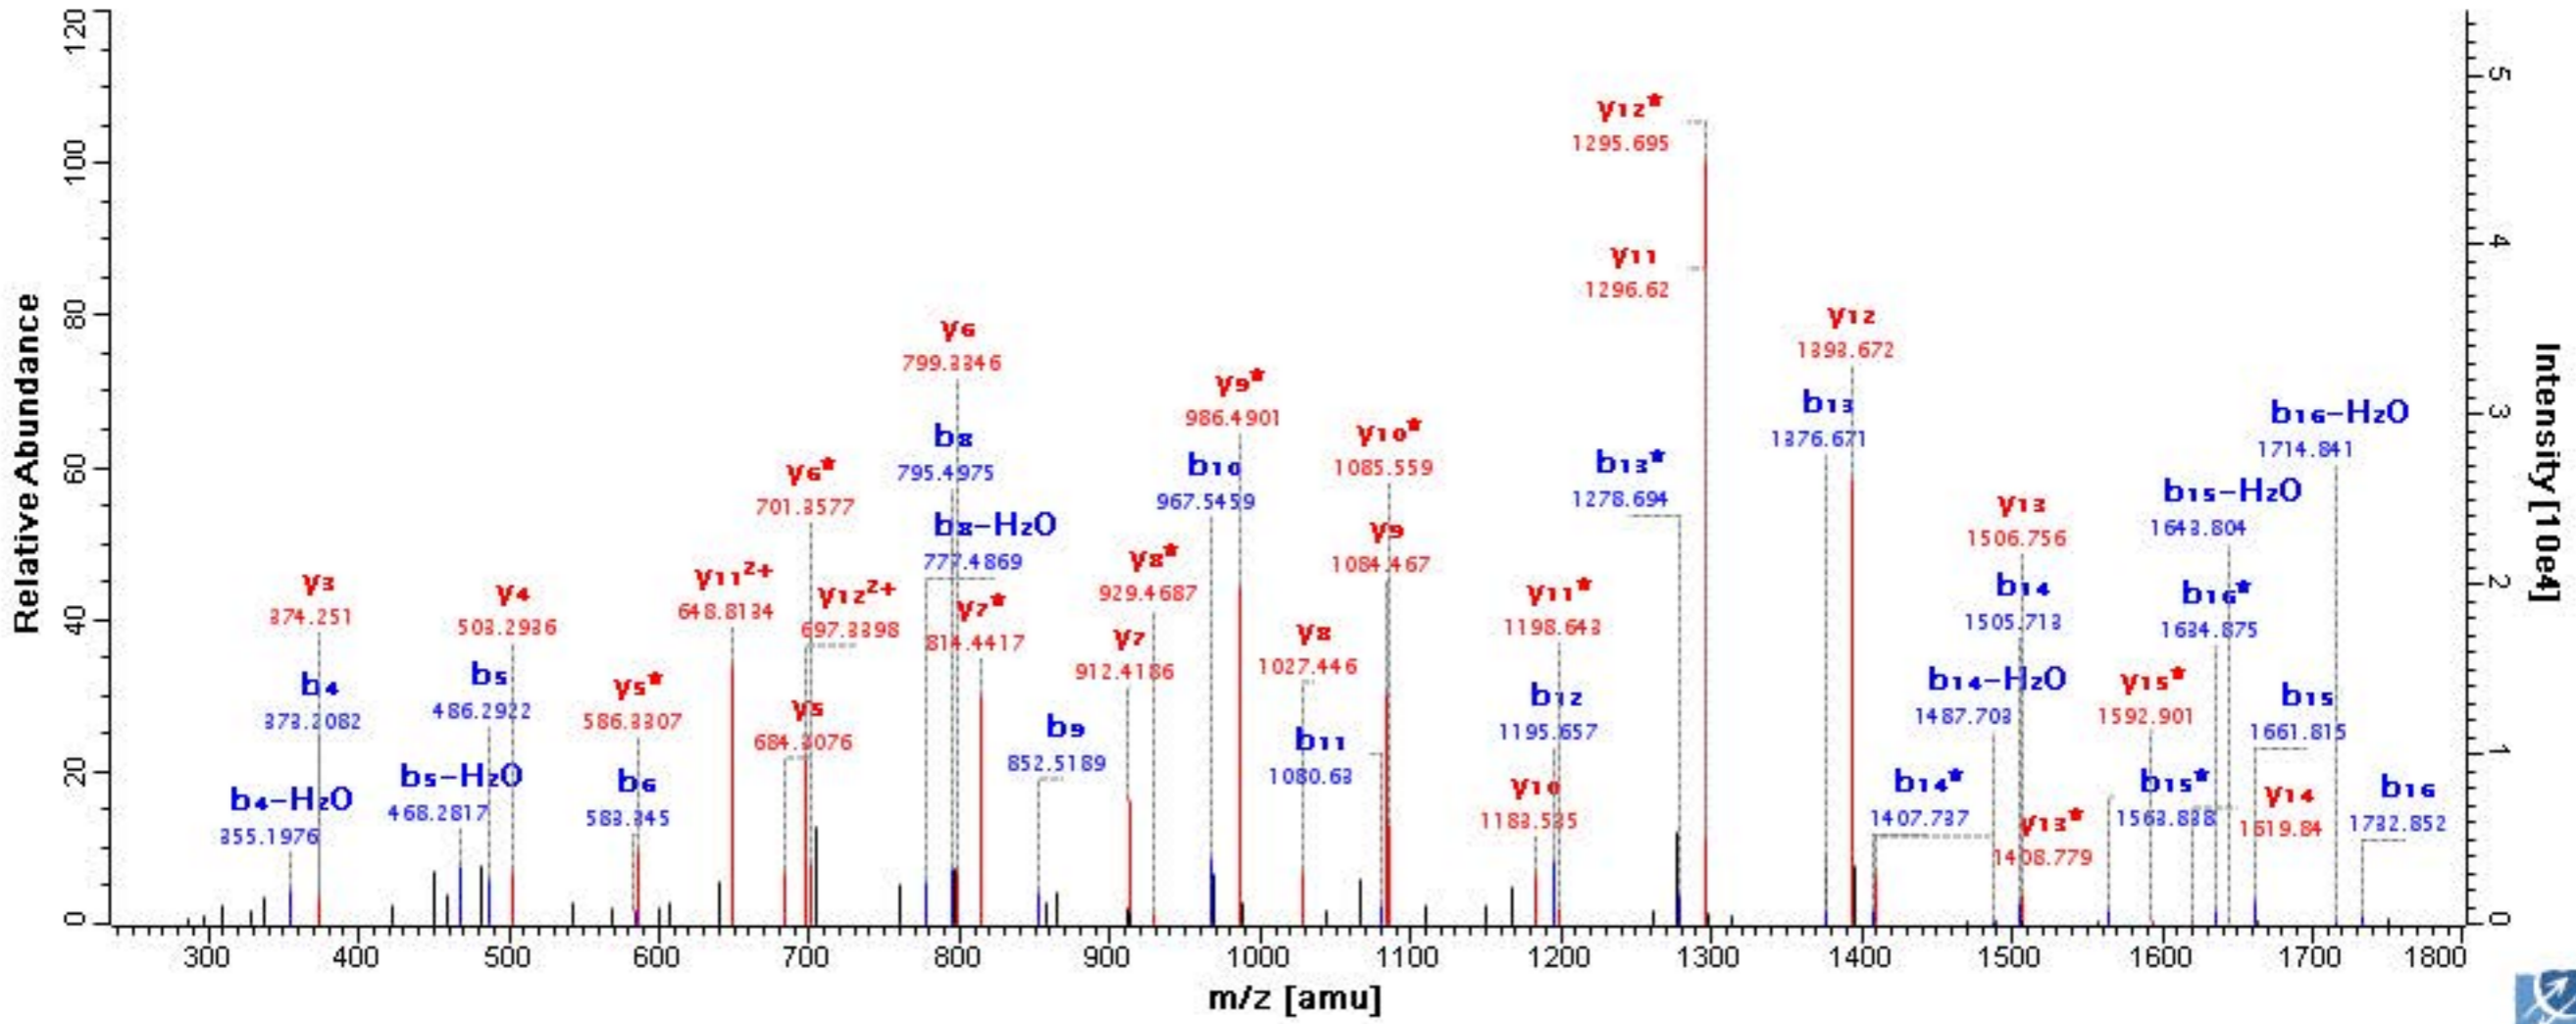

**precursor information**

|                   |                     |
|-------------------|---------------------|
| Mass:             | 1877.94875          |
| m/z:              | System.Collections. |
| Charge:           | System.Collections. |
| Retentiontime:    | System.Collections. |
| Score:            | 297.4548            |
| Mass Error [ppm]: | -0.64494            |
| PEP:              | 2.5647E-199         |
| Precursor Type:   | MULTI               |

| b ion      |              |    |     |    | γ ion        |            | γ <sup>2+</sup> ion |            |
|------------|--------------|----|-----|----|--------------|------------|---------------------|------------|
| Δ dalton   | mass         |    | seq |    | Δ dalton     | mass       | Δ dalton            | mass       |
|            | 88.039304876 | 1  | S   | 16 |              |            |                     |            |
|            | 189.08698335 | 2  | T   | 15 | 1791.9252067 |            | 1791.9252067        |            |
|            | 260.12409714 | 3  | A   | 14 | 1690.8775282 |            | 1690.8775282        |            |
| -0.0045784 | 373.20816112 | 4  | I   | 13 | 1619.8404144 | +0.1964508 | 1619.8404144        |            |
| +0.0087393 | 486.2922251  | 5  | I   | 12 | 1506.7563505 | +0.1048556 | 1506.7563505        |            |
| +0.1991395 | 583.34498895 | 6  | P   | 11 | 1393.6722865 | +0.0650182 | 697.33978147        | -0.0226428 |
|            | 696.42905293 | 7  | I   | 10 | 1296.6195226 | +0.2551112 | 648.81339955        | -0.3156578 |
| -0.0205381 | 795.49746685 | 8  | V   | 9  | 1183.5354586 | -0.0076266 | 1183.5354586        |            |
| +0.0280665 | 852.51893057 | 9  | G   | 8  | 1084.4670447 | +0.1005822 | 1084.4670447        |            |
| -0.0652217 | 967.5458736  | 10 | D   | 7  | 1027.445581  | +0.1484131 | 1027.445581         |            |
| -0.0054259 | 1080.6299376 | 11 | I   | 6  | 912.41863798 | +0.1270774 | 912.41863798        |            |
| -0.046407  | 1195.6568806 | 12 | D   | 5  | 799.334574   | -0.0659583 | 799.334574          |            |
| +0.2220548 | 1376.6708895 | 13 | T   | 4  | 684.30763097 | +0.0546127 | 684.30763097        |            |
| -0.0529601 | 1505.7134826 | 14 | E   | 3  | 503.29362208 | -0.0467959 | 503.29362208        |            |
| +0.0253722 | 1661.8145936 | 15 | R   | 2  | 374.25102899 | +0.0778895 | 374.25102899        |            |
| +0.1421891 | 1732.8517074 | 16 | A   | 1  | 218.14991796 |            | 218.14991796        |            |
|            |              | 17 | K   | 0  | 147.11280417 |            | 147.11280417        |            |

**general information**

|                       |             |
|-----------------------|-------------|
| Annotation:           | 14 of 17    |
| AminoAcids Coverag    | 82 %        |
| Intensity Coverage:   | 78 %        |
| Protein Localisation: | 174 ... 190 |



Source: 20120508\_VR\_Bsu\_TripleSILACrep1\_pT1L1T2\_F03  
 Scannumber: 12472  
 Protein: BSU00940; cys5; spnA  
 Peptide Score: 134.21  
 Method: ITMS; CID; 3

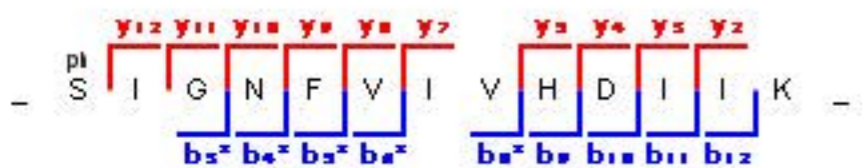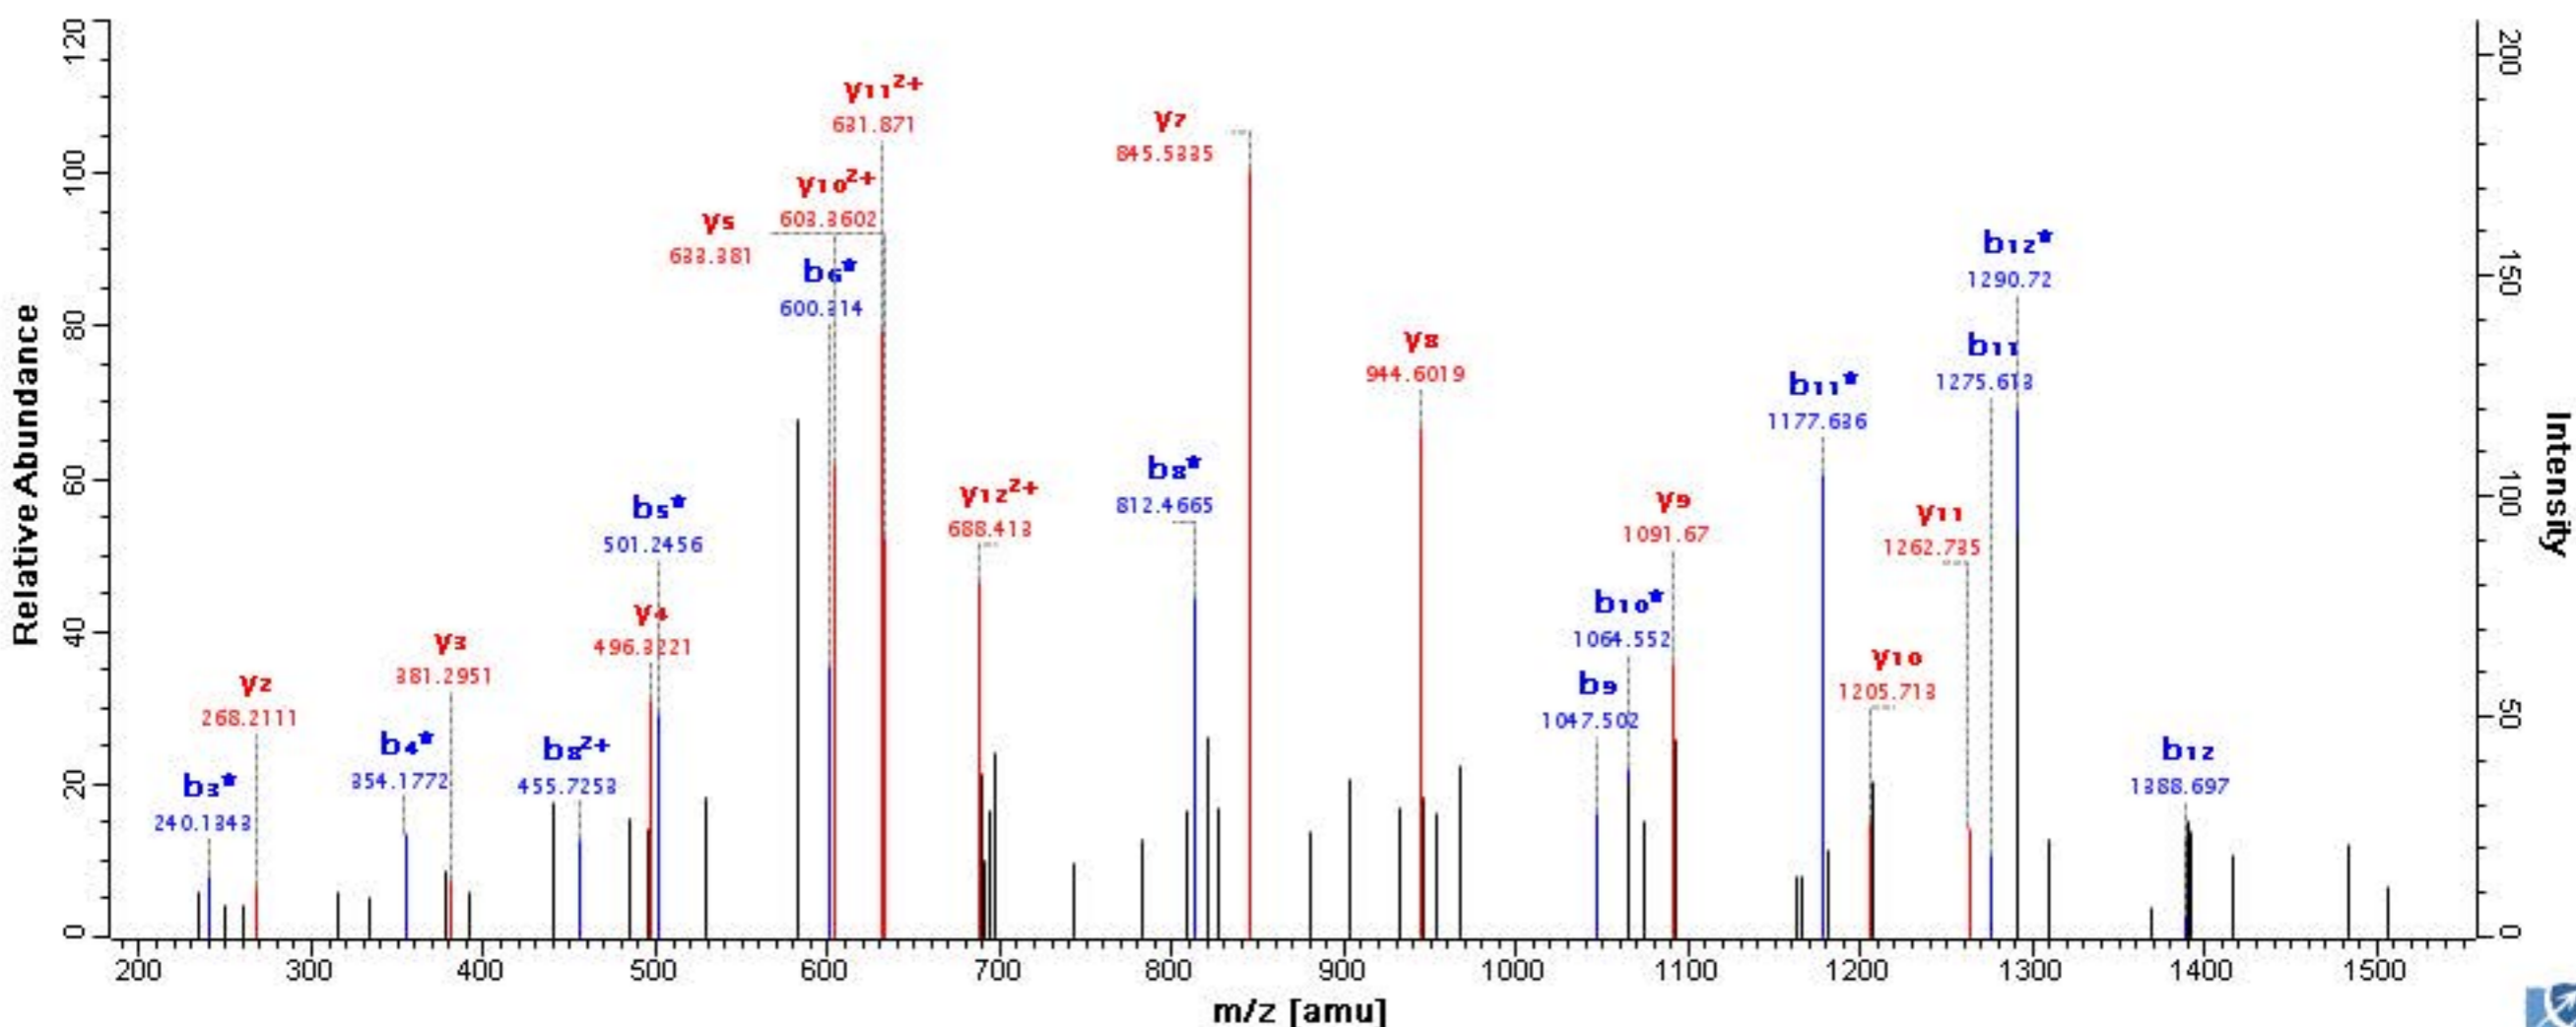

#### precursor information

|                   |                     |
|-------------------|---------------------|
| Mass:             | 1533.79609          |
| m/z:              | System.Collections. |
| Charge:           | System.Collections. |
| Retentiontime:    | System.Collections. |
| Score:            | 134.2065            |
| Mass Error [ppm]: | 0.29858             |
| PEP:              | 1.0327E-07          |
| Precursor Type:   | MULTI               |

#### general information

|                       |             |
|-----------------------|-------------|
| Annotation:           | 11 of 13    |
| AminoAcids Coverag    | 85 %        |
| Intensity Coverage:   | 54 %        |
| Protein Localisation: | 270 ... 282 |

| b <sup>2+</sup> ion |          | b ion     |          |     | γ ion |          | γ <sup>2+</sup> ion |           |           |           |
|---------------------|----------|-----------|----------|-----|-------|----------|---------------------|-----------|-----------|-----------|
| Δ dalton            | mass     | Δ dalton  | mass     | seq |       | Δ dalton | mass                | Δ dalton  | mass      |           |
|                     | 168.0056 |           | 168.0056 | 1   | S     | 12       |                     |           |           |           |
|                     | 281.0897 |           | 281.0897 | 2   | I     | 11       | 1375.819            | 688.413   | -0.114611 |           |
|                     | 338.1112 |           | 338.1112 | 3   | G     | 10       | 1262.735            | +0.270566 | 631.871   | +0.093864 |
|                     | 452.1541 |           | 452.1541 | 4   | N     | 9        | 1205.713            | +0.062416 | 603.3602  | +0.291791 |
|                     | 599.2225 |           | 599.2225 | 5   | F     | 8        | 1091.67             | -0.026004 | 1091.67   |           |
|                     | 698.2909 |           | 698.2909 | 6   | V     | 7        | 944.6019            | +0.158132 | 944.6019  |           |
|                     | 811.375  |           | 811.375  | 7   | I     | 6        | 845.5335            | +0.004073 | 845.5335  |           |
| +0.417181           | 455.7253 |           | 910.4434 | 8   | V     | 5        | 732.4494            |           | 732.4494  |           |
|                     | 1047.502 | -0.003895 | 1047.502 | 9   | H     | 4        | 633.381             | +0.091792 | 633.381   |           |
|                     | 1162.529 |           | 1162.529 | 10  | D     | 3        | 496.3221            | +0.015573 | 496.3221  |           |
|                     | 1275.613 | +0.039517 | 1275.613 | 11  | I     | 2        | 381.2951            | +0.082371 | 381.2951  |           |
|                     | 1388.697 | +0.159555 | 1388.697 | 12  | I     | 1        | 268.2111            | +0.011223 | 268.2111  |           |
|                     |          |           |          | 13  | K     | 0        | 155.127             |           | 155.127   |           |

Source: 20120508\_VR\_Bsu\_TripleSILACrep1\_pT1L1T2\_F03  
 Scannumber: 12499  
 Protein: BSU23500; drm; yqkN  
 Peptide Score: 146.16  
 Method: ITMS; CID; 3

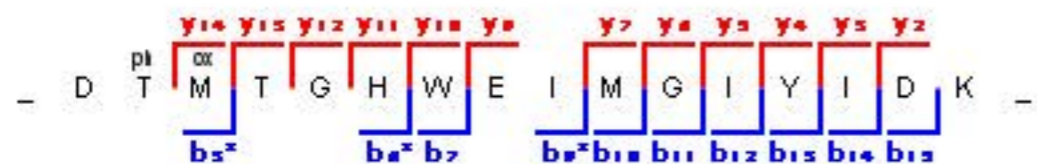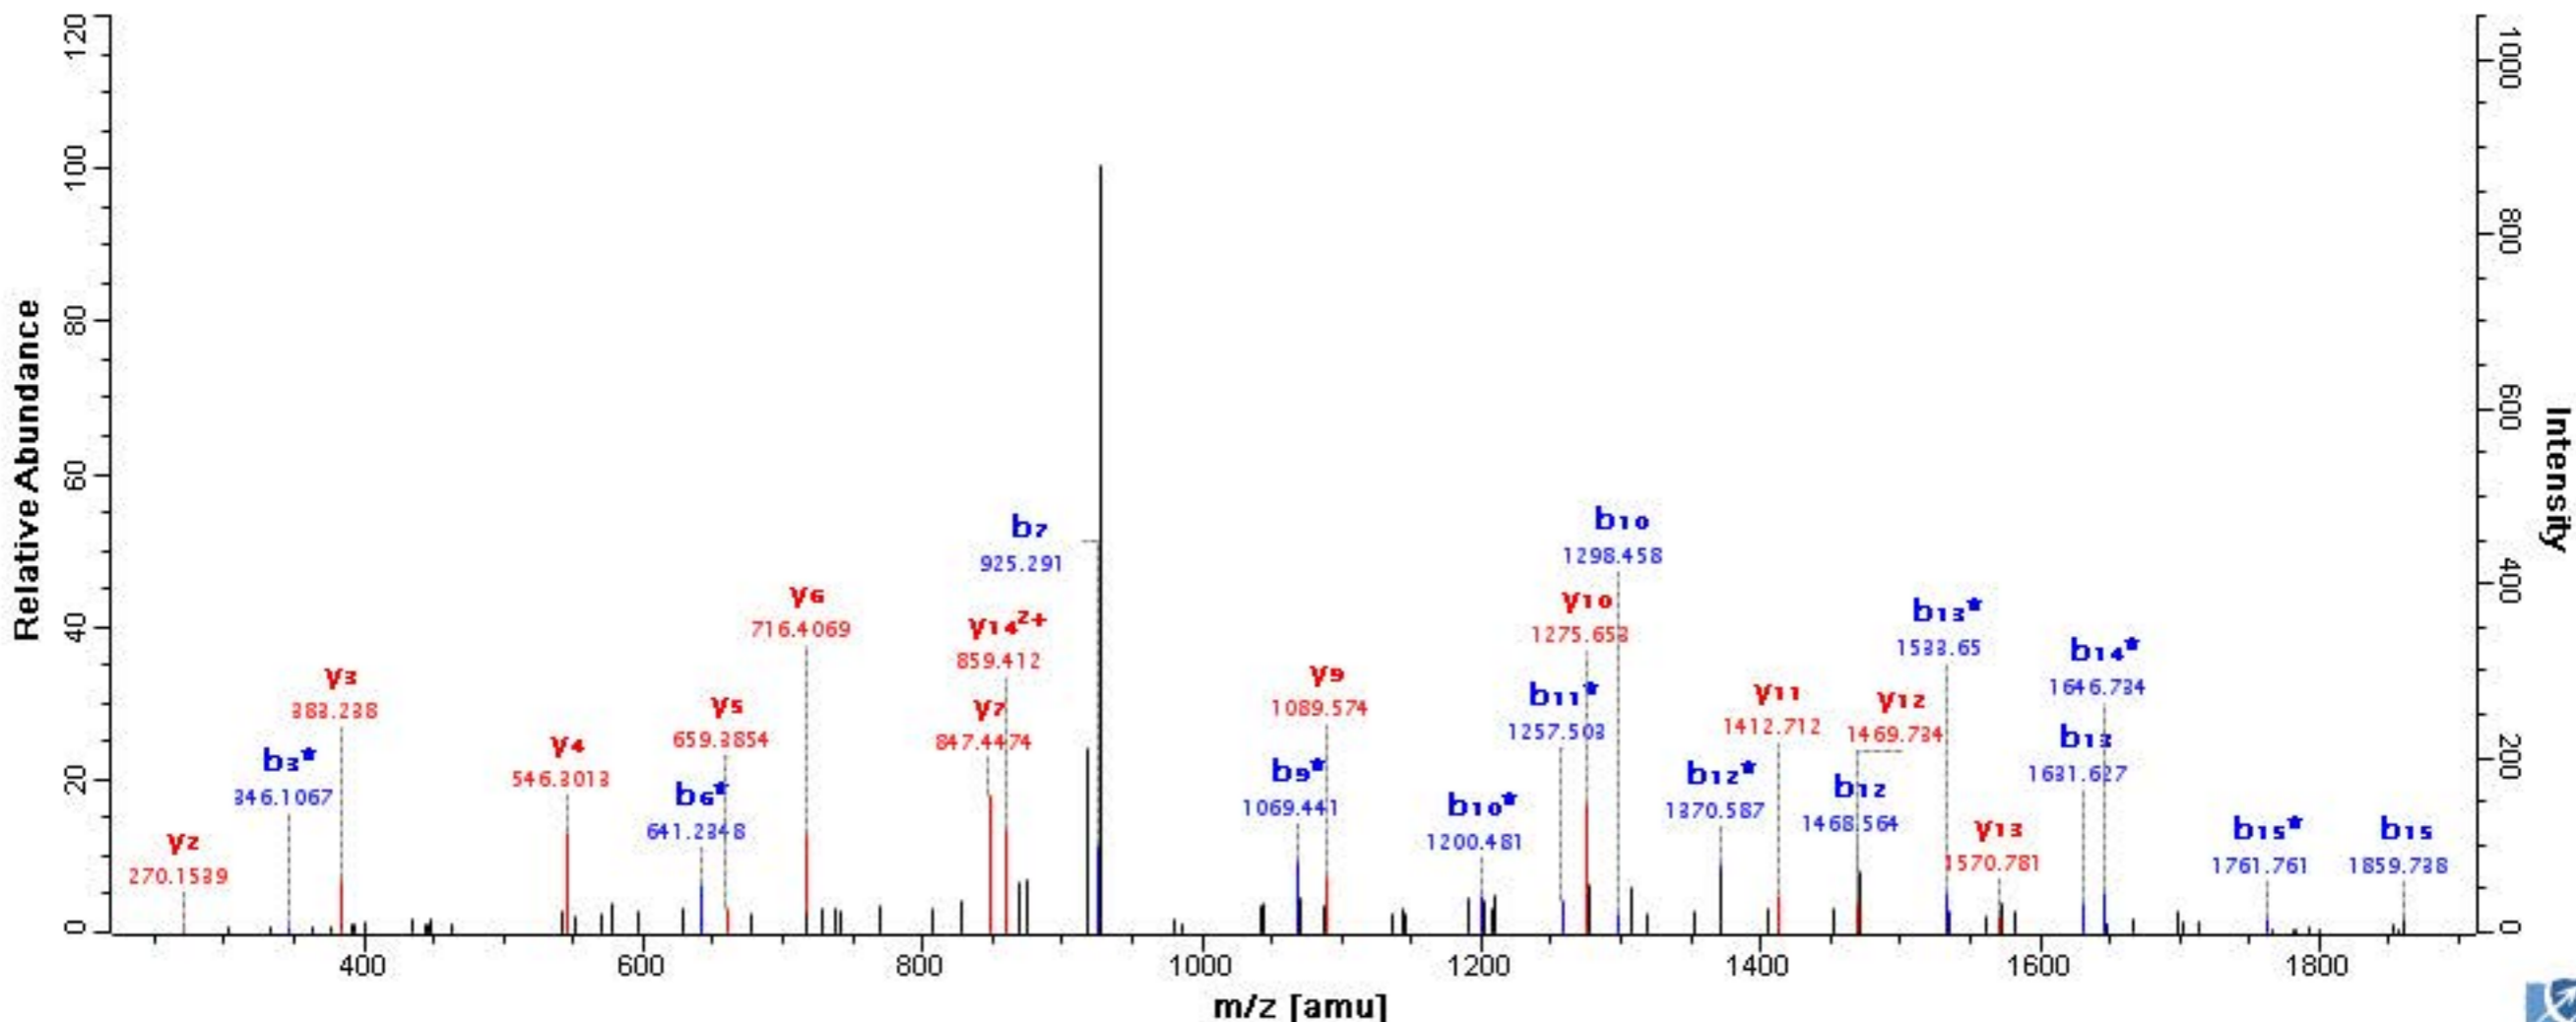

#### precursor information

|                   |                     |
|-------------------|---------------------|
| Mass:             | 2004.83672          |
| m/z:              | System.Collections. |
| Charge:           | System.Collections. |
| Retentiontime:    | System.Collections. |
| Score:            | 146.1593            |
| Mass Error [ppm]: | 0.23539             |
| PEP:              | 9.973E-12           |
| Precursor Type:   | MULTI               |

#### general information

|                       |            |
|-----------------------|------------|
| Annotation:           | 13 of 16   |
| AminoAcids Coverag    | 81 %       |
| Intensity Coverage:   | 34 %       |
| Protein Localisation: | 86 ... 101 |

| b ion      |              |    |     |    | y ion        |            | y <sup>2+</sup> ion |            |
|------------|--------------|----|-----|----|--------------|------------|---------------------|------------|
| Δ dalton   | mass         |    | seq |    | Δ dalton     | mass       | Δ dalton            | mass       |
|            | 116.0342195  | 1  | D   | 15 |              |            |                     |            |
|            | 297.04822838 | 2  | T   | 14 | 1898.830783  |            | 1898.830783         |            |
|            | 444.08362761 | 3  | M   | 13 | 1717.8167742 |            | 859.41202531        | +0.4054796 |
|            | 545.13130608 | 4  | T   | 12 | 1570.7813749 | +0.2416964 | 1570.7813749        |            |
|            | 602.15276981 | 5  | G   | 11 | 1469.7336965 | +0.0330272 | 1469.7336965        |            |
|            | 739.21168167 | 6  | H   | 10 | 1412.7122327 | +0.3612536 | 1412.7122327        |            |
| +0.4381314 | 925.29099462 | 7  | W   | 9  | 1275.6533209 | +0.0537104 | 1275.6533209        |            |
|            | 1054.3335877 | 8  | E   | 8  | 1089.5740079 | +0.0852938 | 1089.5740079        |            |
|            | 1167.4176517 | 9  | I   | 7  | 960.53141483 |            | 960.53141483        |            |
| +0.1961606 | 1298.4581363 | 10 | M   | 6  | 847.44735084 | +0.1046511 | 847.44735084        |            |
|            | 1355.4796    | 11 | G   | 5  | 716.40686624 | +0.0214175 | 716.40686624        |            |
| +0.151546  | 1468.563664  | 12 | I   | 4  | 659.38540251 | +0.1702615 | 659.38540251        |            |
| -0.1980375 | 1631.6269925 | 13 | Y   | 3  | 546.30133853 | -0.0519489 | 546.30133853        |            |
|            | 1744.7110565 | 14 | I   | 2  | 383.23801    | +0.091061  | 383.23801           |            |
| +0.000892  | 1859.7379996 | 15 | D   | 1  | 270.15394602 | +0.1336211 | 270.15394602        |            |
|            |              | 16 | K   | 0  | 155.12700298 |            | 155.12700298        |            |

Source: 20120508\_VR\_Bsu\_TripleSILACrep1\_pT1L1T2\_F03  
 Scannumber: 5136  
 Protein: BSU33940; gap; gapA  
 Peptide Score: 108.72  
 Method: ITMS; CID; 3

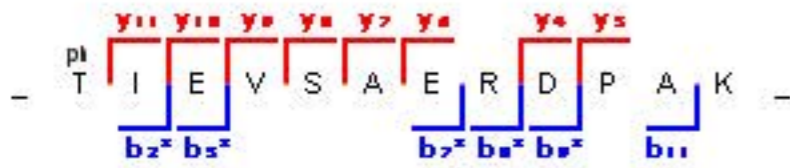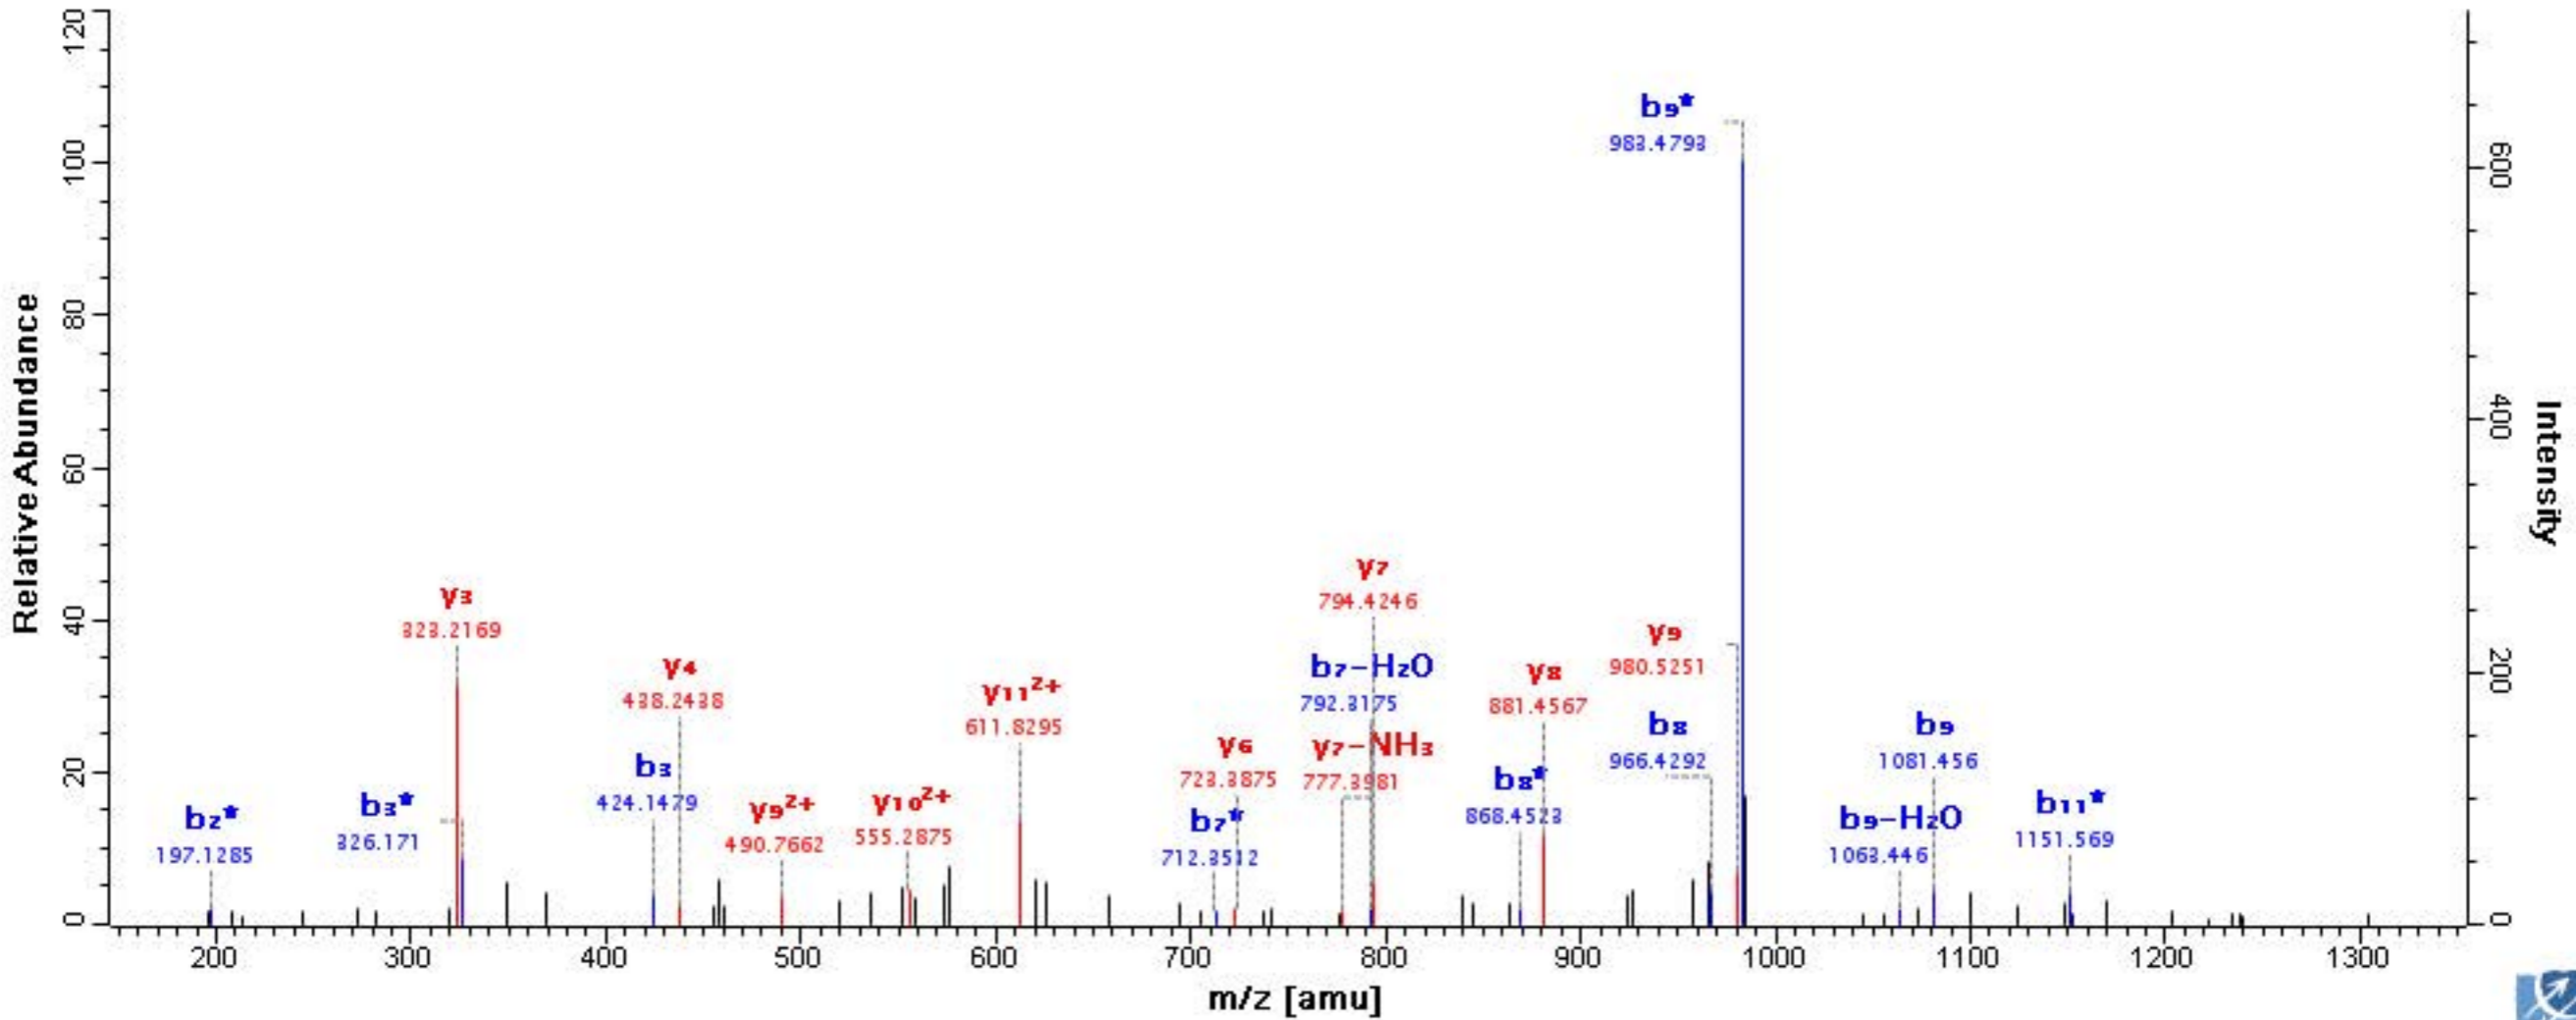

**precursor information**

|                   |                     |
|-------------------|---------------------|
| Mass:             | 1394.64457          |
| m/z:              | System.Collections. |
| Charge:           | System.Collections. |
| Retentiontime:    | System.Collections. |
| Score:            | 108.7163            |
| Mass Error [ppm]: | 0.21196             |
| PEP:              | 8.2235E-05          |
| Precursor Type:   | MULTI               |

**general information**

|                       |           |
|-----------------------|-----------|
| Annotation:           | 10 of 12  |
| AminoAcids Coverag    | 83 %      |
| Intensity Coverage:   | 57 %      |
| Protein Localisation: | 71 ... 82 |

| b ion      |              |    |     |    | y ion        |            | y <sup>2+</sup> ion |            |
|------------|--------------|----|-----|----|--------------|------------|---------------------|------------|
| Δ dalton   | mass         |    | seq |    | Δ dalton     | mass       | Δ dalton            | mass       |
|            | 182.02128535 | 1  | T   | 11 |              |            |                     |            |
|            | 295.10534933 | 2  | I   | 10 | 1222.651741  |            | 611.82950872        | +0.0139361 |
| +0.1376411 | 424.14794243 | 3  | E   | 9  | 1109.567677  |            | 555.28747673        | +0.1902454 |
|            | 523.21635634 | 4  | V   | 8  | 980.52508389 | -0.0648788 | 490.76618018        | -0.2194273 |
|            | 610.24838475 | 5  | S   | 7  | 881.45666998 | -0.0770923 | 881.45666998        |            |
|            | 681.28549854 | 6  | A   | 6  | 794.42464157 | -0.1139726 | 794.42464157        |            |
|            | 810.32809164 | 7  | E   | 5  | 723.38752778 | -0.2585605 | 723.38752778        |            |
| +0.0422939 | 966.42920266 | 8  | R   | 4  | 594.34493468 |            | 594.34493468        |            |
| +0.0914617 | 1081.4561457 | 9  | D   | 3  | 438.24382366 | -0.0884892 | 438.24382366        |            |
|            | 1178.5089095 | 10 | P   | 2  | 323.21688062 | +0.0802996 | 323.21688062        |            |
|            | 1249.5460233 | 11 | A   | 1  | 226.16411677 |            | 226.16411677        |            |
|            |              | 12 | K   | 0  | 155.12700298 |            | 155.12700298        |            |

Source: 20120508\_VR\_Bsu\_TripleSILACrep1\_pT1L1T2\_F03  
 Scannumber: 5744  
 Protein: aroA; BSU29750  
 Peptide Score: 101.39  
 Method: ITMS; CID; 3

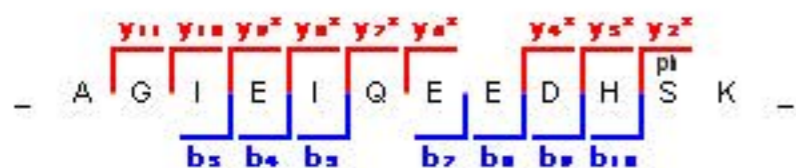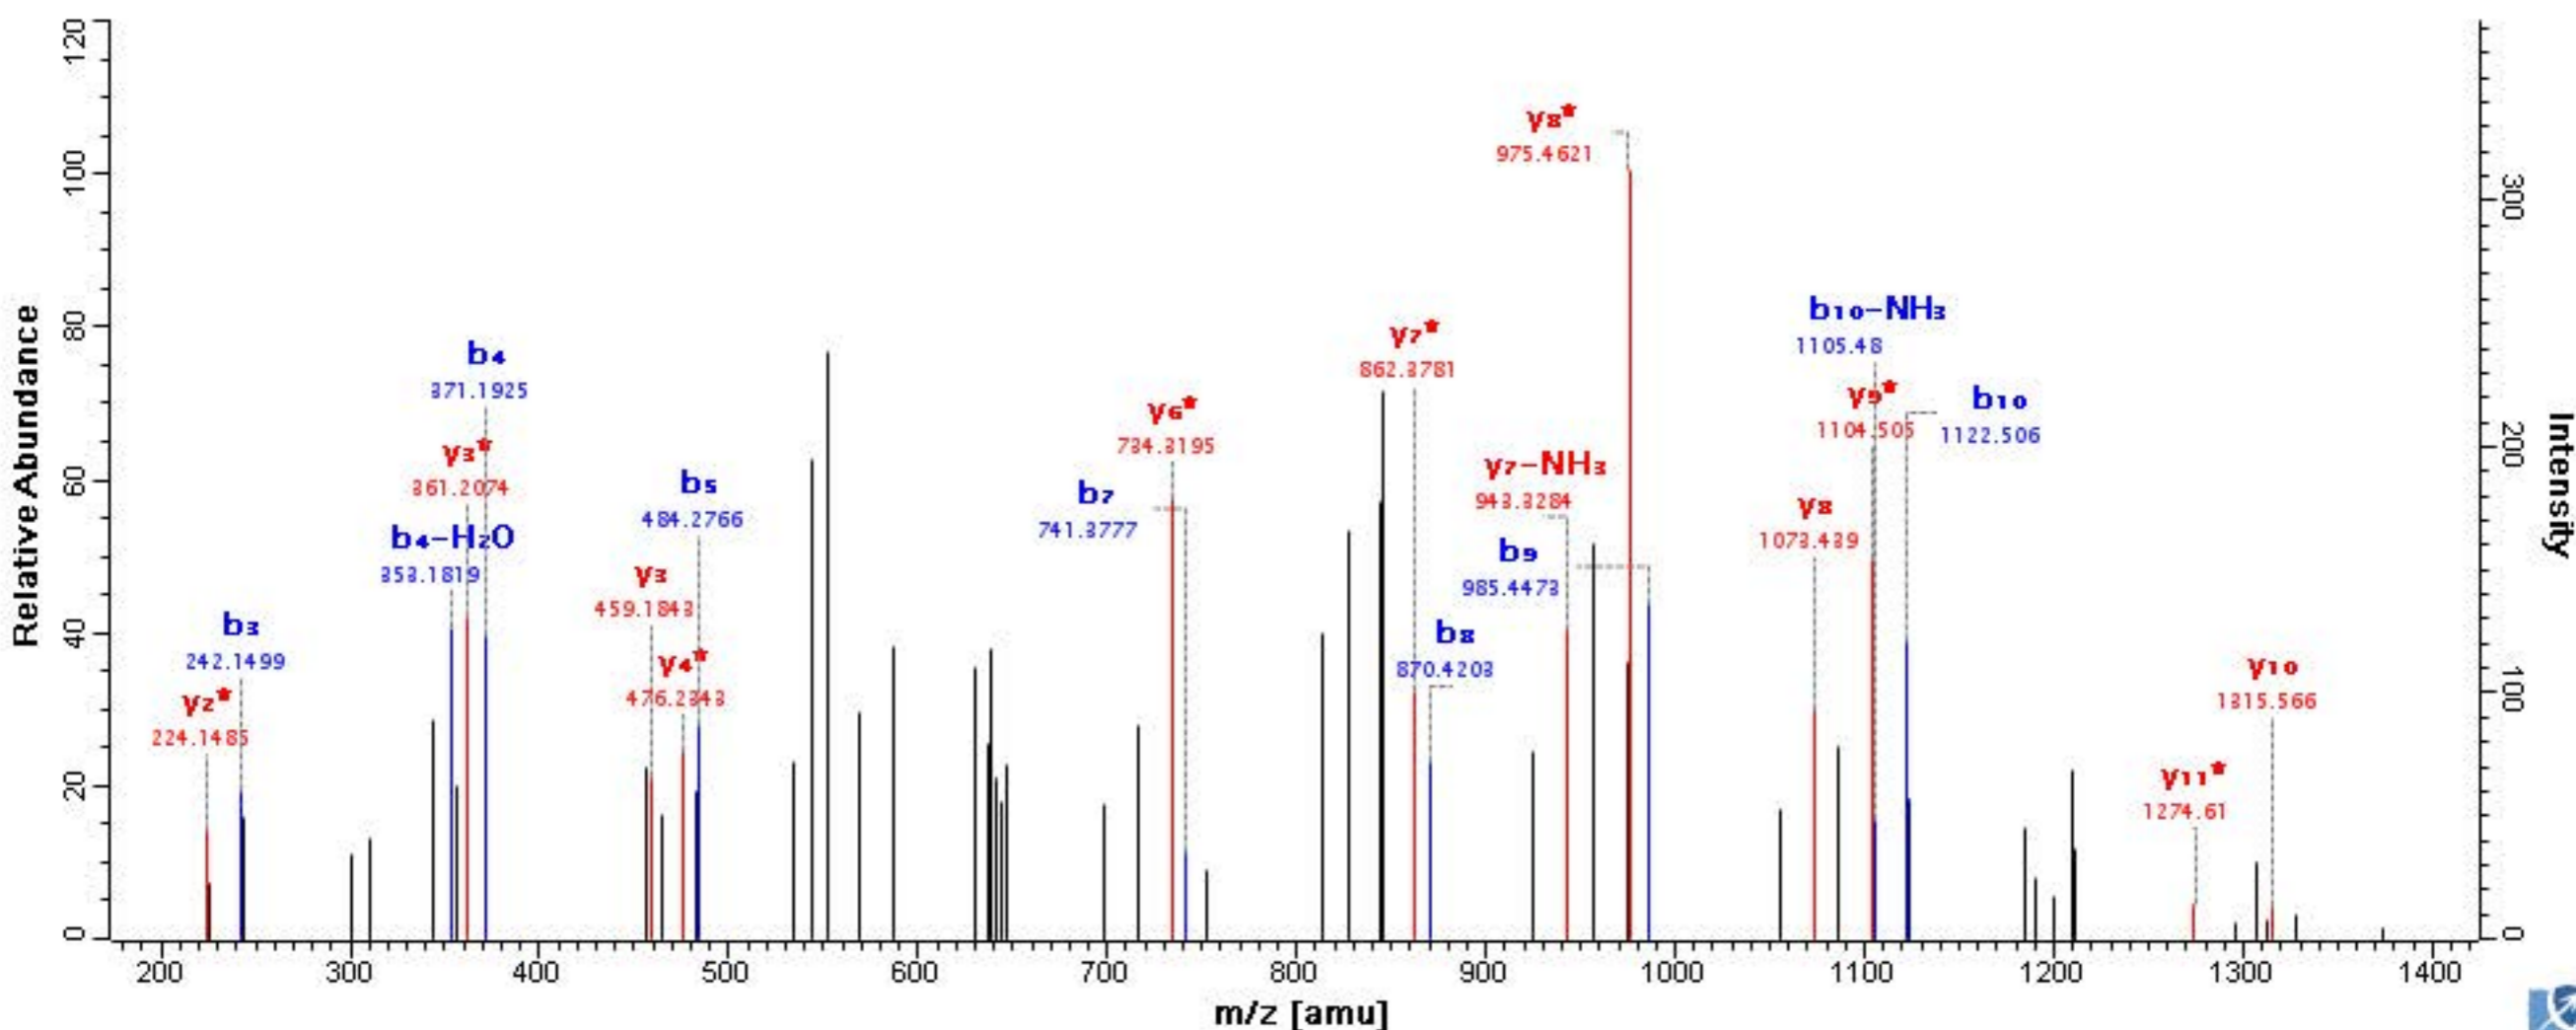

#### precursor information

|                   |                     |
|-------------------|---------------------|
| Mass:             | 1434.60338          |
| m/z:              | System.Collections. |
| Charge:           | System.Collections. |
| Retentiontime:    | System.Collections. |
| Score:            | 101.3879            |
| Mass Error [ppm]: | 0.4013              |
| PEP:              | 0.00031937          |
| Precursor Type:   | MULTI               |

#### general information

|                       |           |
|-----------------------|-----------|
| Annotation:           | 10 of 12  |
| AminoAcids Coverag    | 83 %      |
| Intensity Coverage:   | 38 %      |
| Protein Localisation: | 81 ... 92 |

| b ion        |                |    |     |    | gamma ion      |            |  |
|--------------|----------------|----|-----|----|----------------|------------|--|
| delta dalton | mass           |    | seq |    | delta dalton   | mass       |  |
|              | 72.044390254   | 1  | A   | 11 |                |            |  |
|              | 129.065853978  | 2  | G   | 10 | 1372.587165181 |            |  |
| +0.0542599   | 242.149917958  | 3  | I   | 9  | 1315.565701457 | +0.3289519 |  |
| -0.1054749   | 371.192511055  | 4  | E   | 8  | 1202.481637477 |            |  |
| -0.0805911   | 484.276575035  | 5  | I   | 7  | 1073.439044381 | -0.1717104 |  |
|              | 612.335152546  | 6  | Q   | 6  | 960.3549804    |            |  |
| -0.0437613   | 741.377745643  | 7  | E   | 5  | 832.296402889  |            |  |
| -0.066579    | 870.420338739  | 8  | E   | 4  | 703.253809793  |            |  |
| -0.0375528   | 985.447281771  | 9  | D   | 3  | 574.211216696  |            |  |
| +0.0805984   | 1122.506193633 | 10 | H   | 2  | 459.184273664  | +0.0396643 |  |
|              | 1289.504552451 | 11 | S   | 1  | 322.125361802  |            |  |
|              |                | 12 | K   | 0  | 155.127002984  |            |  |

Source: 20120508\_VR\_Bsu\_TripleSILACrep1\_pT1L1T2\_F05  
 Scannumber: 11335  
 Protein: BSU28280; leuA  
 Peptide Score: 154.39  
 Method: ITMS; CID; 3

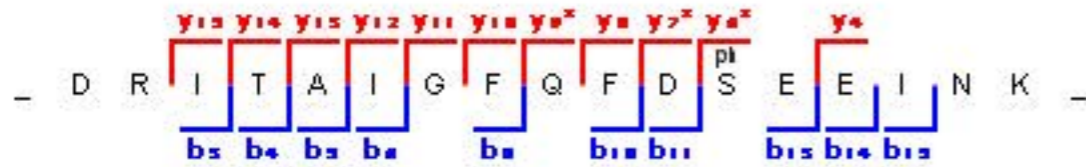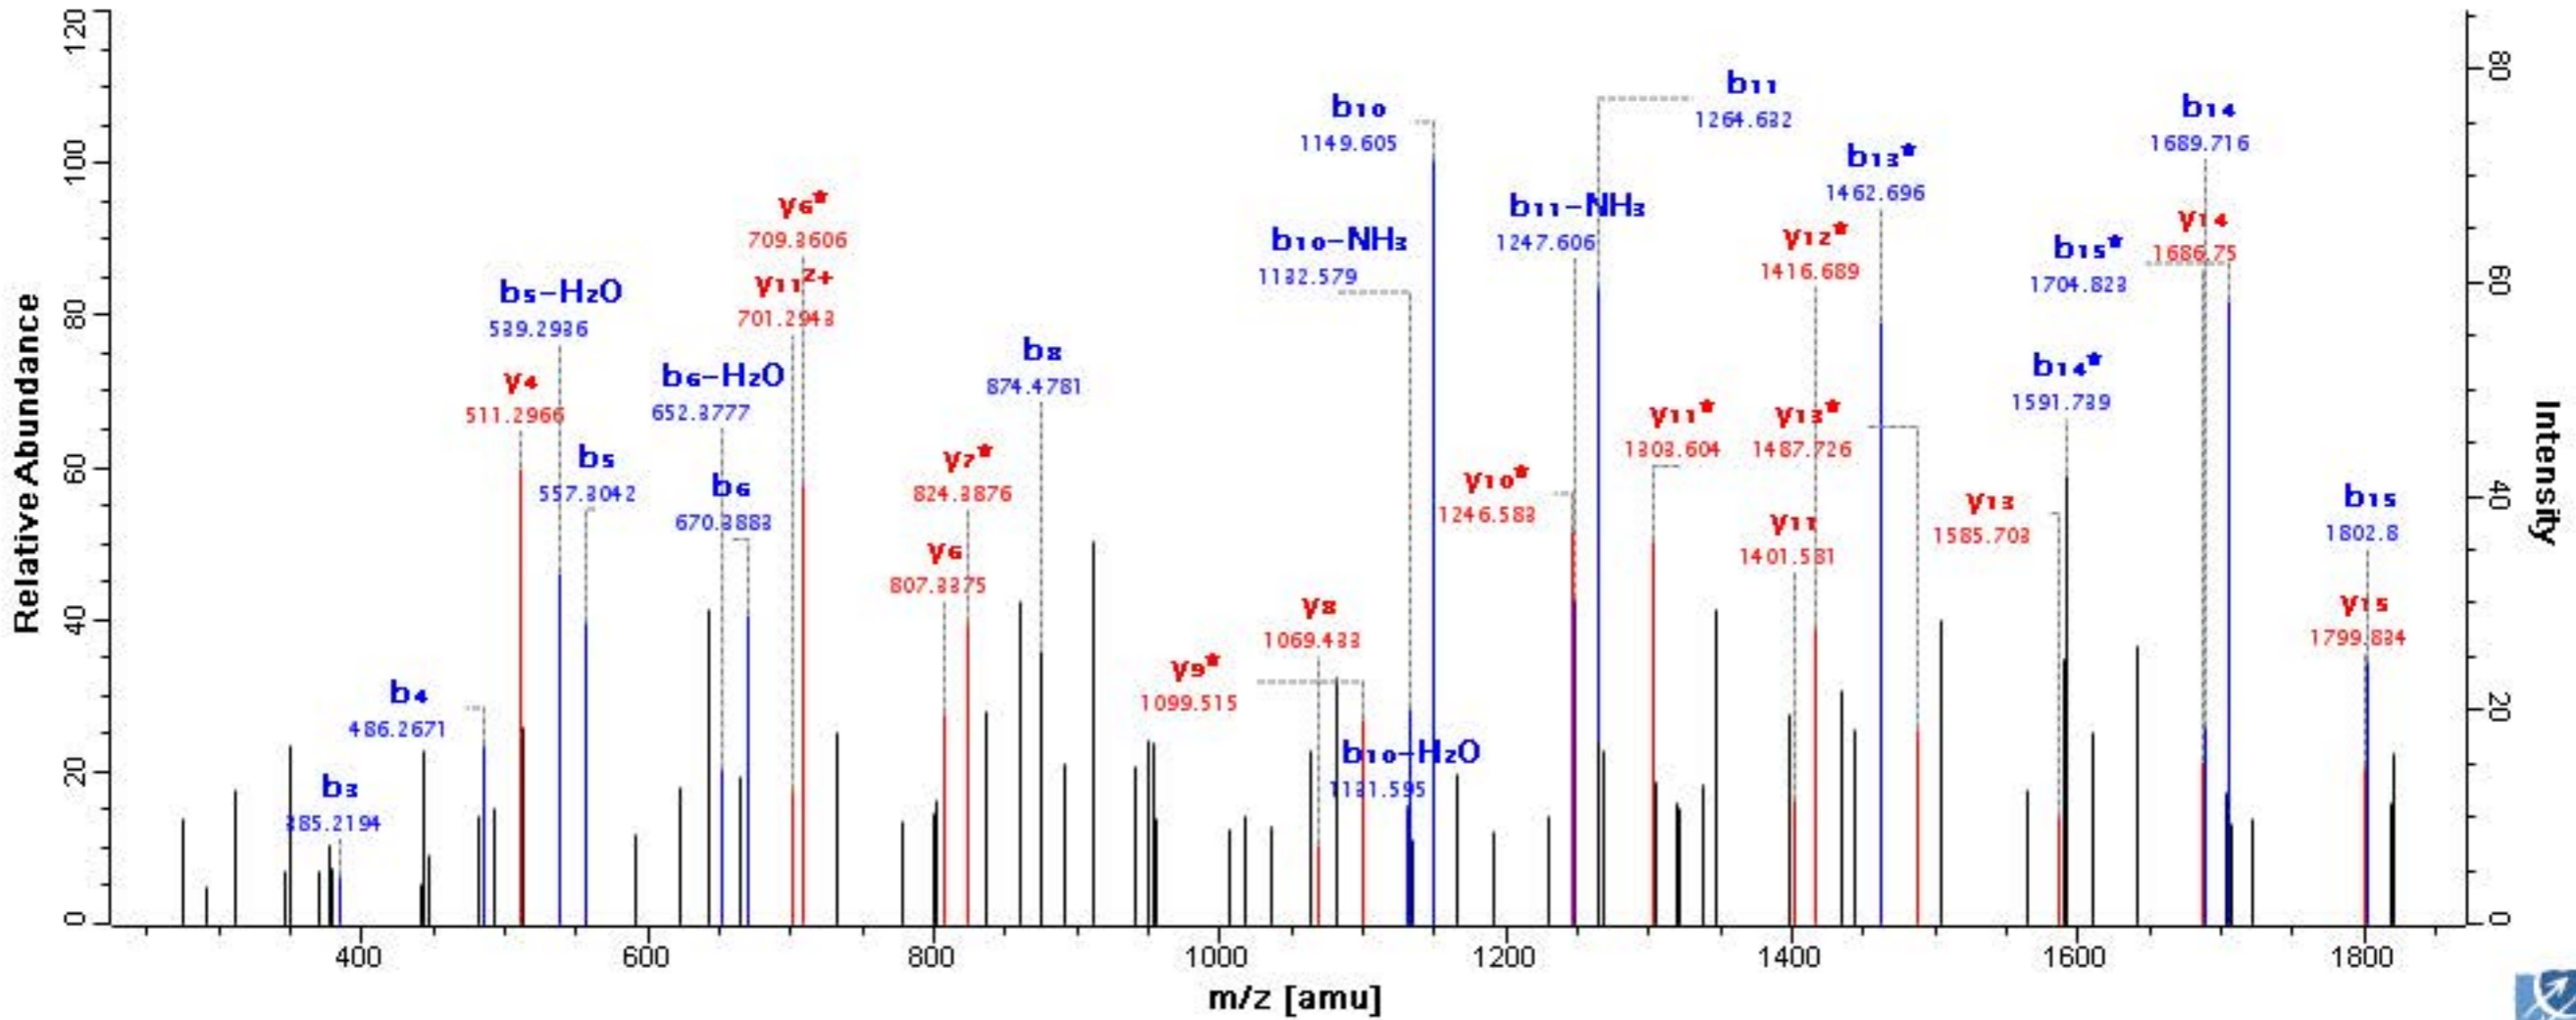

**precursor information**

|                   |                     |
|-------------------|---------------------|
| Mass:             | 2061.94043          |
| m/z:              | System.Collections. |
| Charge:           | System.Collections. |
| Retentiontime:    | System.Collections. |
| Score:            | 154.3935            |
| Mass Error [ppm]: | -0.20546            |
| PEP:              | 4.0345E-20          |
| Precursor Type:   | MULTI               |

| b ion      |              | seq |   |    | gamma ion    |            | gamma <sup>2+</sup> ion |            |
|------------|--------------|-----|---|----|--------------|------------|-------------------------|------------|
| Δ dalton   | mass         |     |   |    | Δ dalton     | mass       | Δ dalton                | mass       |
|            | 116.0342195  | 1   | D | 16 |              |            |                         |            |
|            | 272.13533053 | 2   | R | 15 | 1955.9353828 |            | 1955.9353828            |            |
| +0.2114527 | 385.21939451 | 3   | I | 14 | 1799.8342717 | -0.0961126 | 1799.8342717            |            |
| +0.0501878 | 486.2670298  | 4   | T | 13 | 1686.7502078 | +0.3024045 | 1686.7502078            |            |
| +0.2407351 | 557.30418677 | 5   | A | 12 | 1585.7025293 | +0.0748145 | 1585.7025293            |            |
| -0.00672   | 670.38825075 | 6   | I | 11 | 1514.6654155 |            | 1514.6654155            |            |
|            | 727.40971447 | 7   | G | 10 | 1401.5813515 | +0.0712364 | 701.29431399            | +0.2009863 |
| +0.1419888 | 874.47812839 | 8   | F | 9  | 1344.5598878 |            | 1344.5598878            |            |
|            | 1002.5367059 | 9   | Q | 8  | 1197.4914739 |            | 1197.4914739            |            |
| +0.1263255 | 1149.6051198 | 10  | F | 7  | 1069.4328964 | +0.2450821 | 1069.4328964            |            |
| +0.0957204 | 1264.6320628 | 11  | D | 6  | 922.36448245 |            | 922.36448245            |            |
|            | 1431.6304217 | 12  | S | 5  | 807.33753942 | -0.0254056 | 807.33753942            |            |
|            | 1560.6730148 | 13  | E | 4  | 640.3391806  |            | 640.3391806             |            |
| +0.1155689 | 1689.7156079 | 14  | E | 3  | 511.29658751 | +0.1740241 | 511.29658751            |            |
| +0.003917  | 1802.7996718 | 15  | I | 2  | 382.25399441 |            | 382.25399441            |            |
|            | 1916.8425993 | 16  | N | 1  | 269.16993043 |            | 269.16993043            |            |
|            |              | 17  | K | 0  | 155.12700298 |            | 155.12700298            |            |

**general information**

|                       |             |
|-----------------------|-------------|
| Annotation:           | 13 of 17    |
| AminoAcids Coverag    | 76 %        |
| Intensity Coverage:   | 48 %        |
| Protein Localisation: | 338 ... 354 |

Source: 20120508\_VR\_Bsu\_TripleSILACrep1\_pT1L1T2\_F05  
 Scannumber: 3032  
 Protein: BSU06180; ydjF  
 Peptide Score: 94.19  
 Method: ITMS; CID; 3

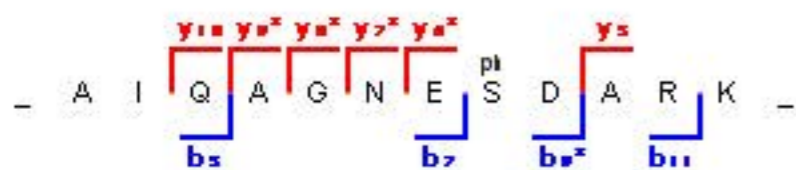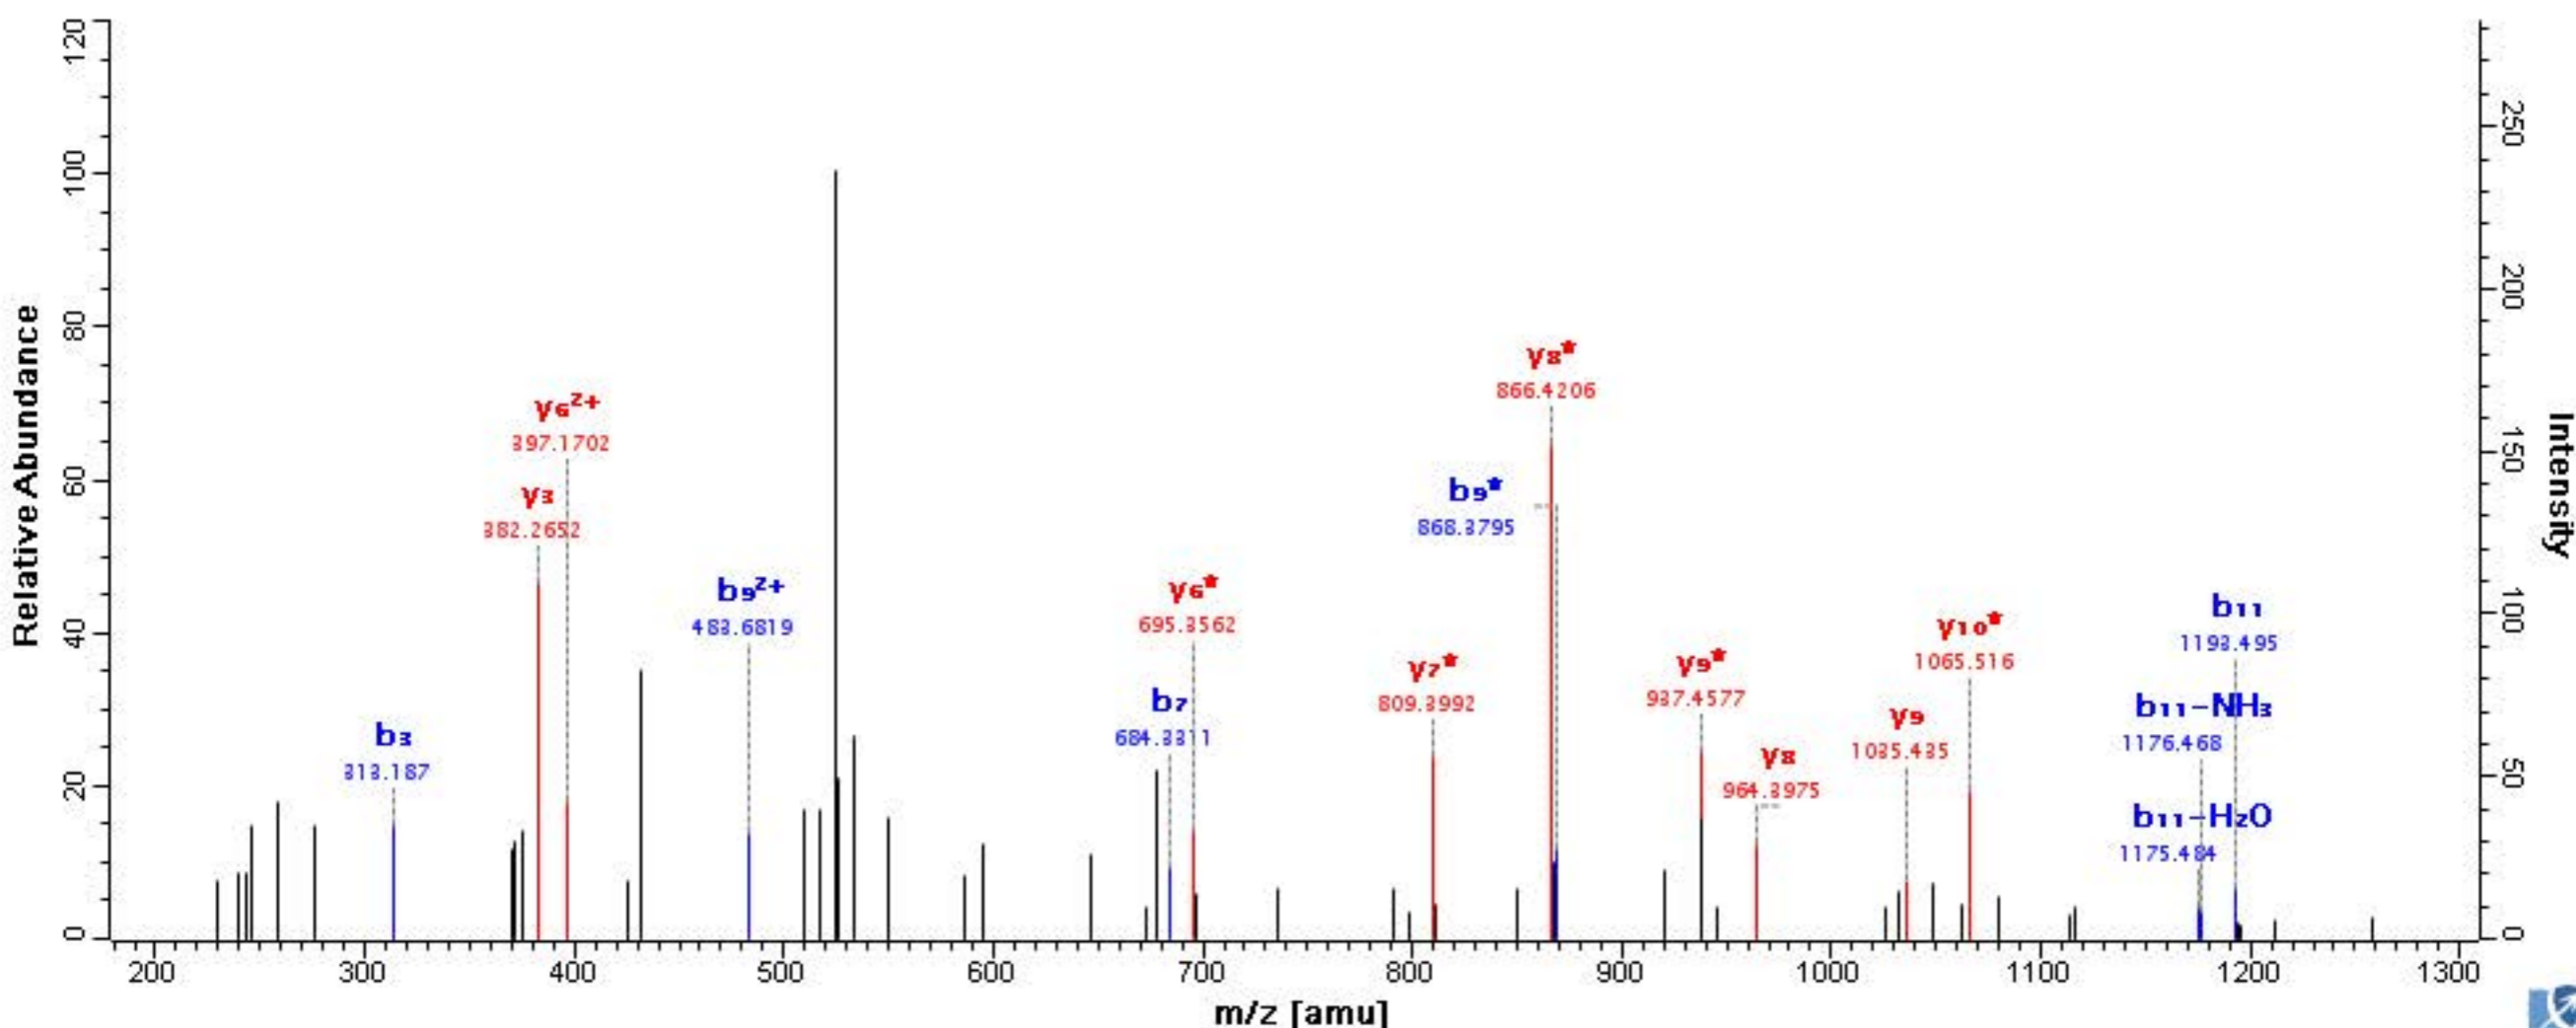

#### precursor information

|                   |                     |
|-------------------|---------------------|
| Mass:             | 1338.59287          |
| m/z:              | System.Collections. |
| Charge:           | System.Collections. |
| Retentiontime:    | System.Collections. |
| Score:            | 94.19147            |
| Mass Error [ppm]: | -0.025637           |
| PEP:              | 0.0011772           |
| Precursor Type:   | MULTI               |

#### general information

|                       |           |
|-----------------------|-----------|
| Annotation:           | 8 of 12   |
| AminoAcids Coverag    | 67 %      |
| Intensity Coverage:   | 36 %      |
| Protein Localisation: | 78 ... 89 |

| b <sup>2+</sup> ion |          | b ion     |          |    | seq |    | γ ion    |           | γ <sup>2+</sup> ion |          |
|---------------------|----------|-----------|----------|----|-----|----|----------|-----------|---------------------|----------|
| Δ dalton            | mass     | Δ dalton  | mass     |    |     |    | Δ dalton | mass      | Δ dalton            | mass     |
|                     | 72.04439 |           | 72.04439 | 1  | A   | 11 |          |           |                     |          |
|                     | 185.1285 |           | 185.1285 | 2  | I   | 10 | 1276.577 |           | 1276.577            |          |
|                     | 313.187  | +0.159526 | 313.187  | 3  | Q   | 9  | 1163.493 |           | 1163.493            |          |
|                     | 384.2241 |           | 384.2241 | 4  | A   | 8  | 1035.435 | -0.111141 | 1035.435            |          |
|                     | 441.2456 |           | 441.2456 | 5  | G   | 7  | 964.3975 | -0.085563 | 964.3975            |          |
|                     | 555.2885 |           | 555.2885 | 6  | N   | 6  | 907.3761 |           | 907.3761            |          |
|                     | 684.3311 | -0.044631 | 684.3311 | 7  | E   | 5  | 793.3331 |           | 397.1702            | -0.00632 |
|                     | 851.3295 |           | 851.3295 | 8  | S   | 4  | 664.2905 |           | 664.2905            |          |
| -0.313934           | 483.6819 |           | 966.3564 | 9  | D   | 3  | 497.2922 |           | 497.2922            |          |
|                     | 1037.394 |           | 1037.394 | 10 | A   | 2  | 382.2652 | +0.044159 | 382.2652            |          |
|                     | 1193.495 | -0.03616  | 1193.495 | 11 | R   | 1  | 311.2281 |           | 311.2281            |          |
|                     |          |           |          | 12 | K   | 0  | 155.127  |           | 155.127             |          |

Source: 20120508\_VR\_Bsu\_TripleSILACrep1\_pT1L1T2\_F05  
 Scannumber: 4381  
 Protein: BSU03790; yclM  
 Peptide Score: 87.65  
 Method: ITMS; CID; 3

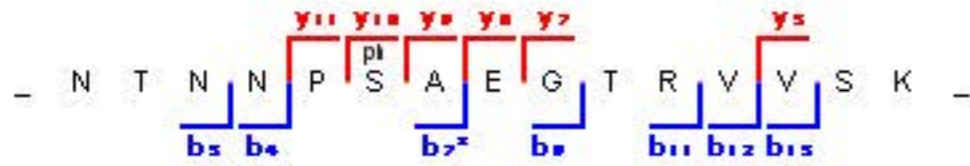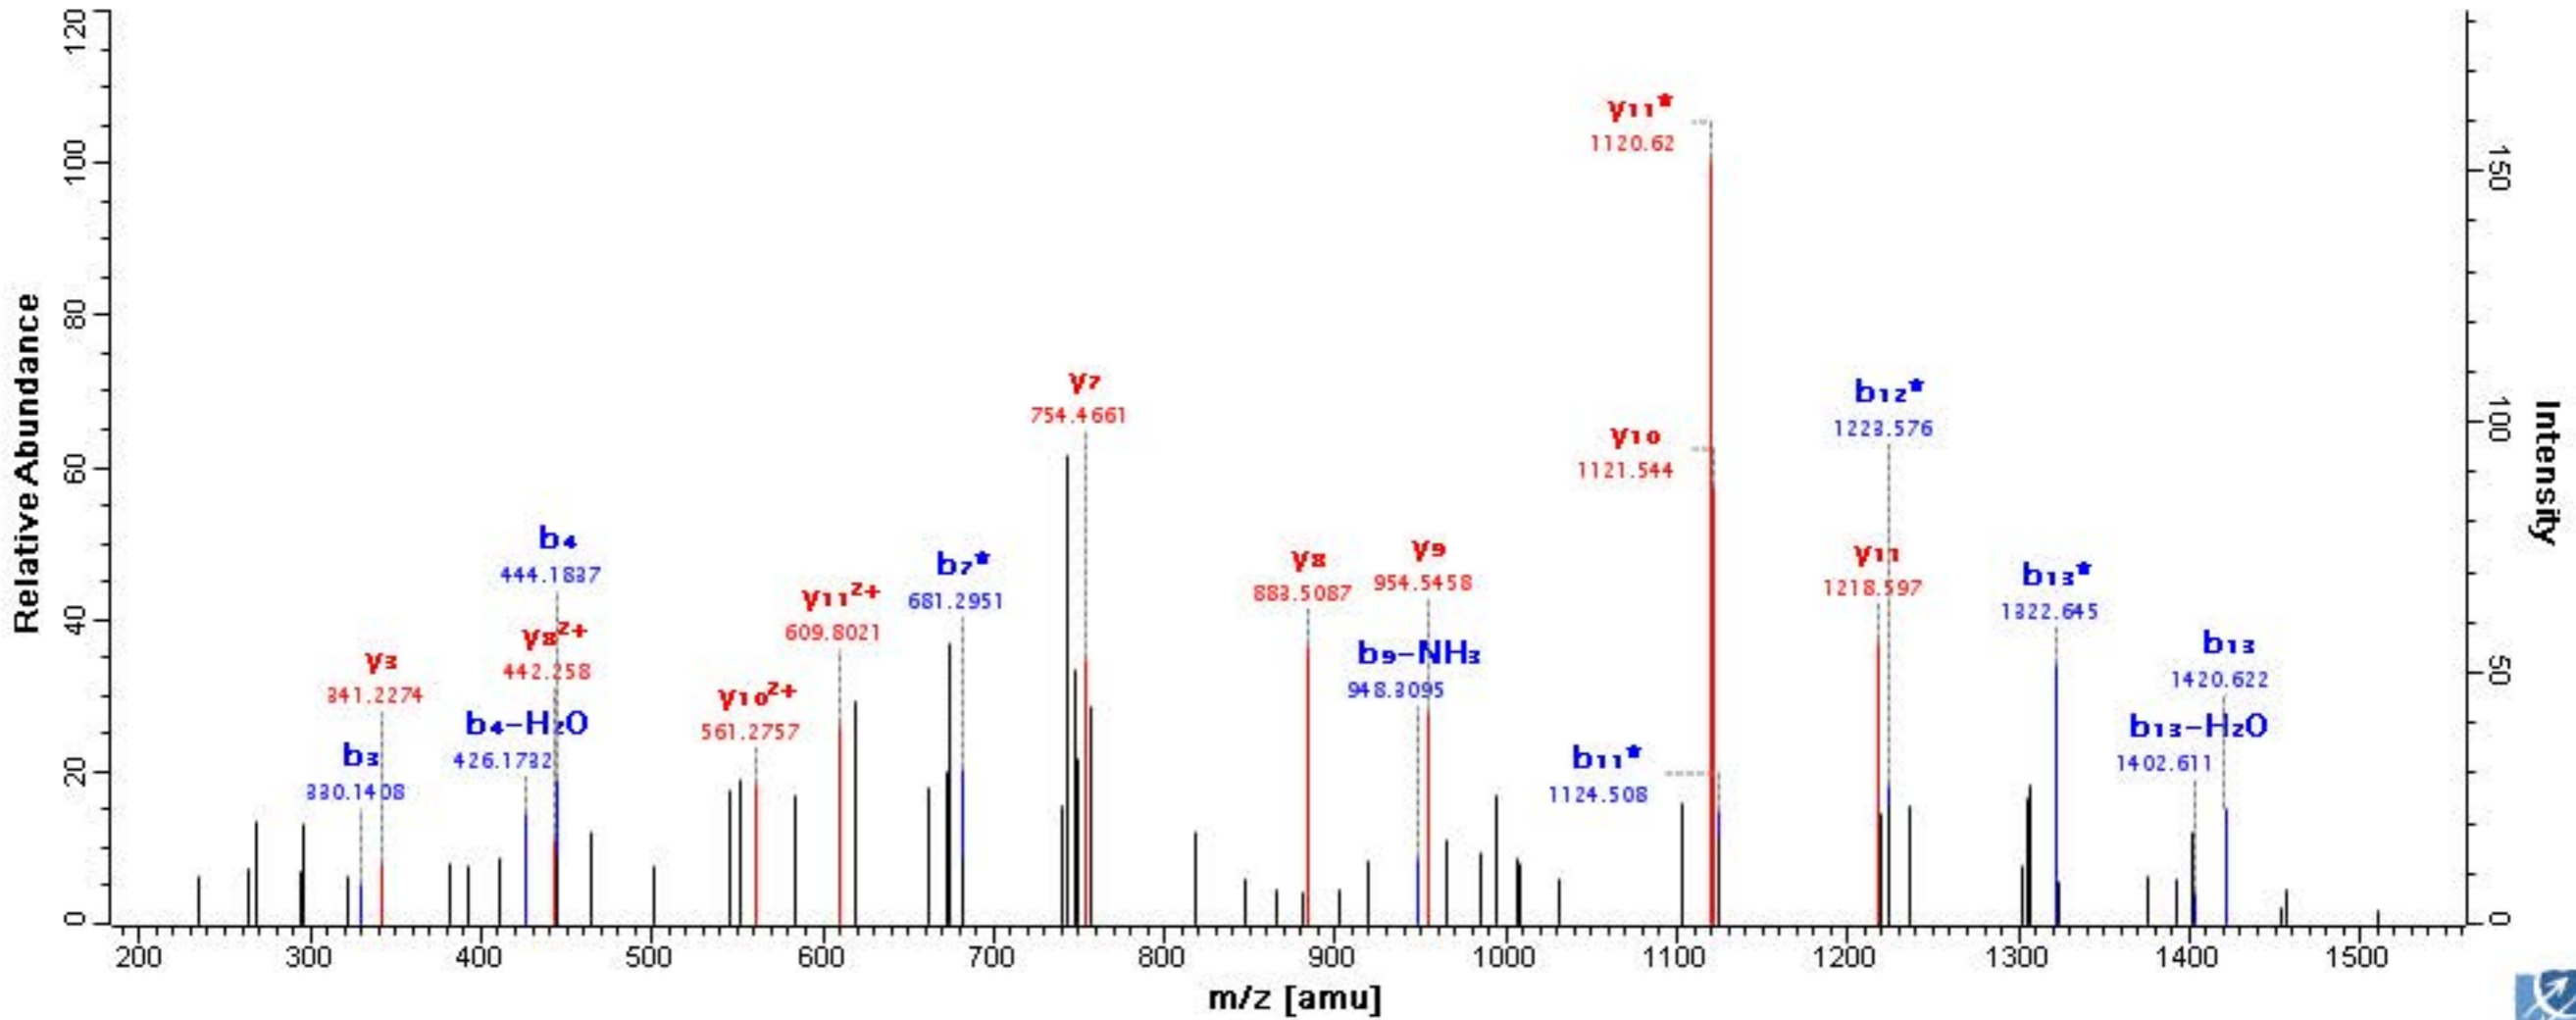

**precursor information**

|                   |                     |
|-------------------|---------------------|
| Mass:             | 1652.75127          |
| m/z:              | System.Collections. |
| Charge:           | System.Collections. |
| Retentiontime:    | System.Collections. |
| Score:            | 87.64727            |
| Mass Error [ppm]: | -0.39541            |
| PEP:              | 0.010602            |
| Precursor Type:   | MULTI               |

**general information**

|                       |             |
|-----------------------|-------------|
| Annotation:           | 11 of 15    |
| AminoAcids Coverag    | 73 %        |
| Intensity Coverage:   | 41 %        |
| Protein Localisation: | 276 ... 290 |

| b ion      |              |    |     |    | y ion        |            | y <sup>2+</sup> ion |            |
|------------|--------------|----|-----|----|--------------|------------|---------------------|------------|
| Δ dalton   | mass         |    | seq |    | Δ dalton     | mass       | Δ dalton            | mass       |
|            | 115.05020391 | 1  | N   | 14 |              |            |                     |            |
|            | 216.09788239 | 2  | T   | 13 | 1547.7304754 |            | 1547.7304754        |            |
| +0.1413862 | 330.14080984 | 3  | N   | 12 | 1446.6827969 |            | 1446.6827969        |            |
| -0.1598115 | 444.18373728 | 4  | N   | 11 | 1332.6398695 |            | 1332.6398695        |            |
|            | 541.23650113 | 5  | P   | 10 | 1218.596942  | +0.0209779 | 609.80210924        | +0.1884303 |
|            | 708.23485995 | 6  | S   | 9  | 1121.5441782 | +0.0234488 | 561.27572731        | -0.4734202 |
|            | 779.27197374 | 7  | A   | 8  | 954.54581934 | +0.1888608 | 954.54581934        |            |
|            | 908.31456684 | 8  | E   | 7  | 883.50870555 | +0.1773906 | 442.25799101        | -0.0052444 |
|            | 965.33603056 | 9  | G   | 6  | 754.46611245 | +0.0778939 | 754.46611245        |            |
|            | 1066.383709  | 10 | T   | 5  | 697.44464873 |            | 697.44464873        |            |
|            | 1222.4848201 | 11 | R   | 4  | 596.39697025 |            | 596.39697025        |            |
|            | 1321.553234  | 12 | V   | 3  | 440.29585923 |            | 440.29585923        |            |
| +0.2041578 | 1420.6216479 | 13 | V   | 2  | 341.22744531 | +0.1170676 | 341.22744531        |            |
|            | 1507.6536763 | 14 | S   | 1  | 242.15903139 |            | 242.15903139        |            |
|            |              | 15 | K   | 0  | 155.12700298 |            | 155.12700298        |            |

Source: 20120508\_VR\_Bsu\_TripleSILACrep1\_pT1L1T2\_F05  
 Scannumber: 5667  
 Protein: BSU15290; ftsZ  
 Peptide Score: 84.17  
 Method: ITMS; CID; 3

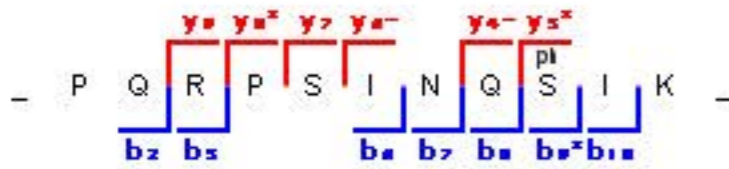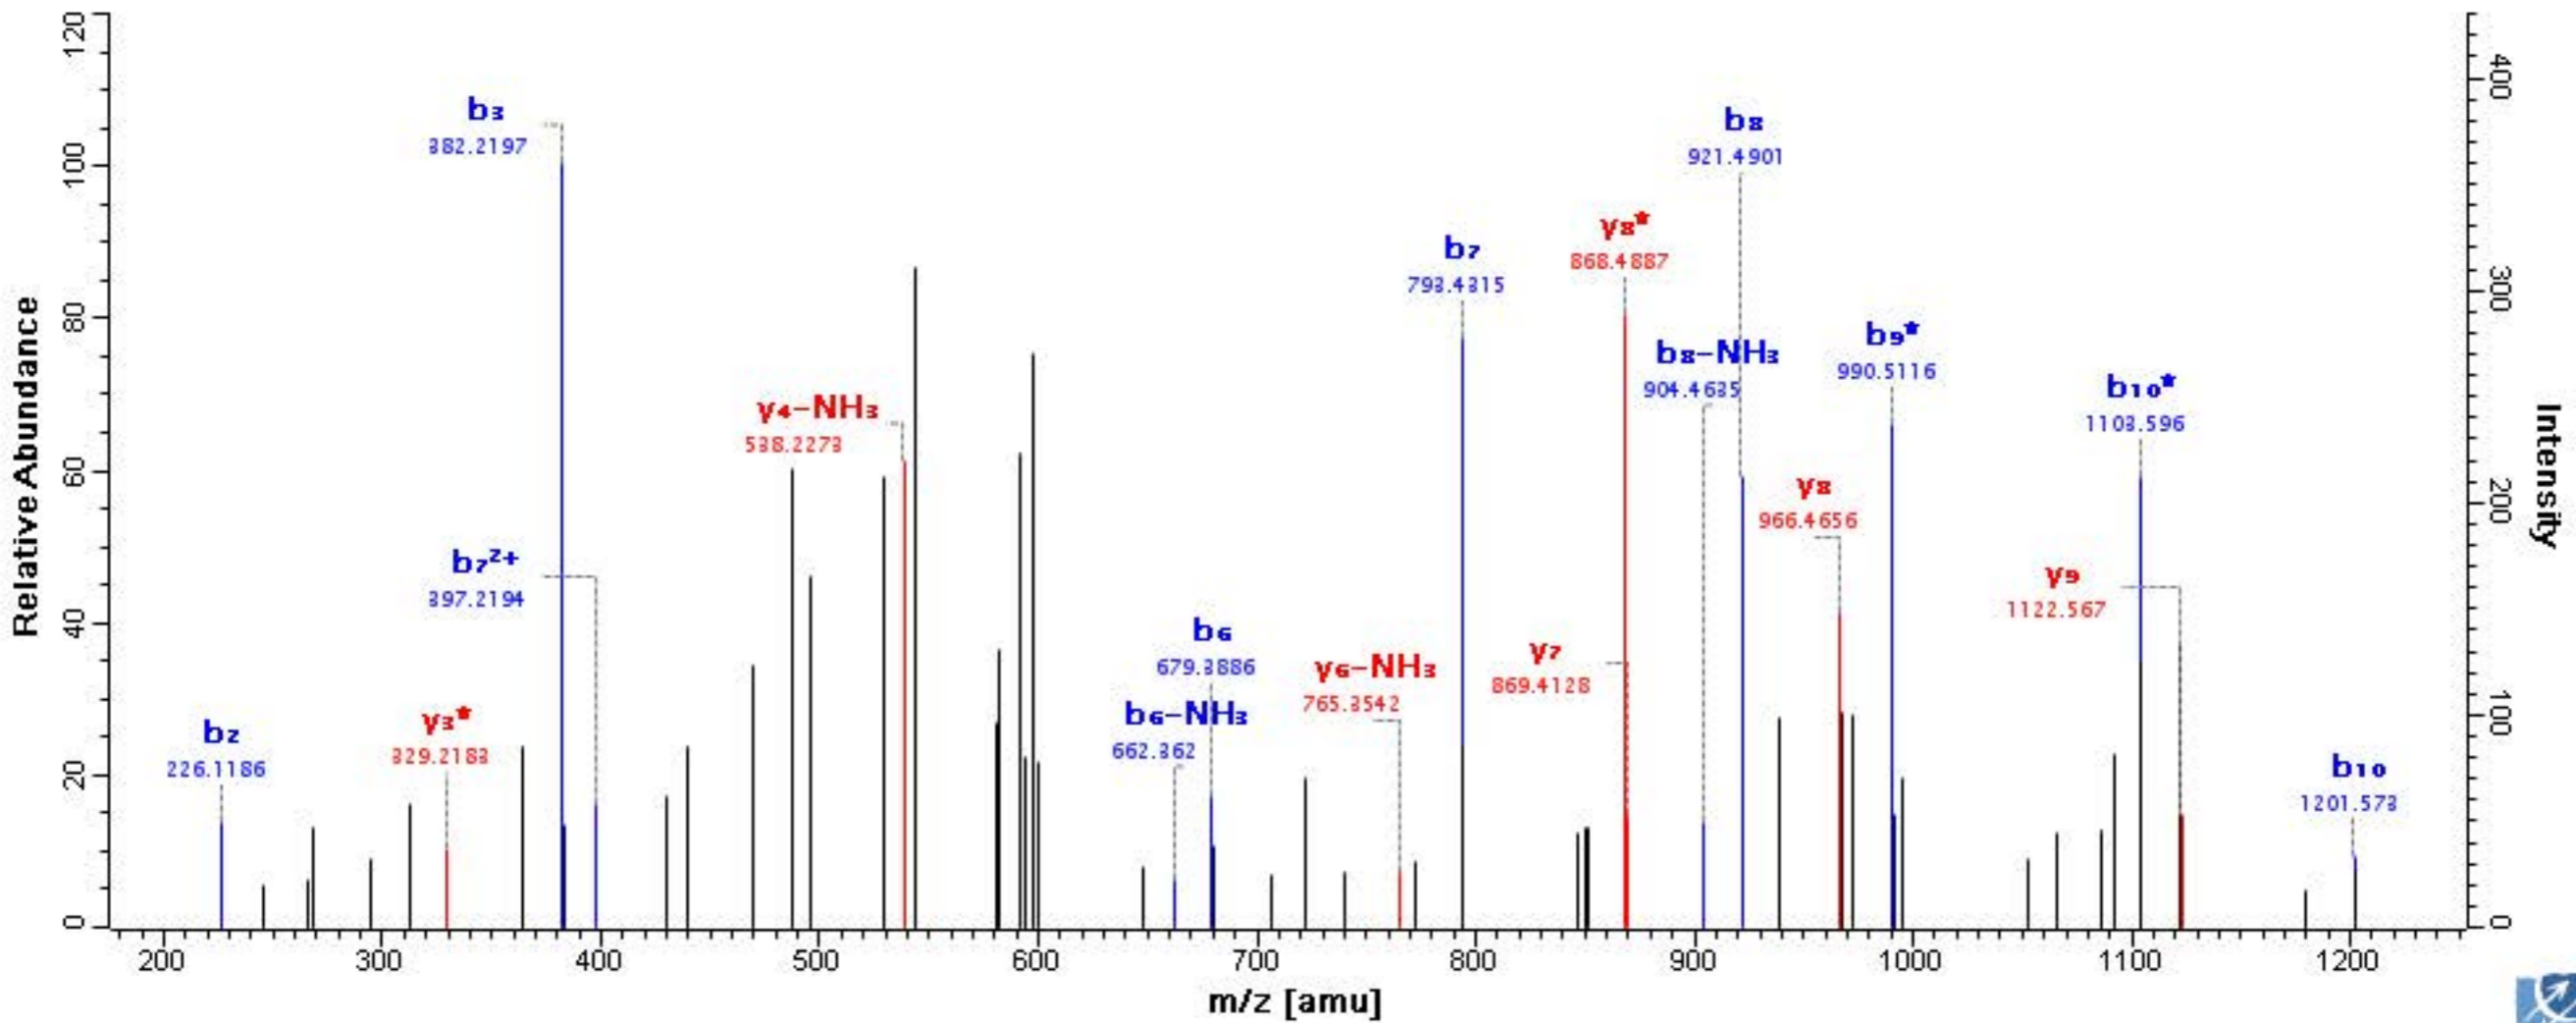

#### precursor information

|                   |                     |
|-------------------|---------------------|
| Mass:             | 1346.67065          |
| m/z:              | System.Collections. |
| Charge:           | System.Collections. |
| Retentiontime:    | System.Collections. |
| Score:            | 84.16871            |
| Mass Error [ppm]: | -0.08451            |
| PEP:              | 0.0040454           |
| Precursor Type:   | MULTI               |

#### general information

|                       |             |
|-----------------------|-------------|
| Annotation:           | 9 of 11     |
| AminoAcids Coverage:  | 82 %        |
| Intensity Coverage:   | 39 %        |
| Protein Localisation: | 325 ... 335 |

| b <sup>2+</sup> ion |              | b ion      |              |    | seq |          | y ion                   |  |
|---------------------|--------------|------------|--------------|----|-----|----------|-------------------------|--|
| Δ dalton            | mass         | Δ dalton   | mass         |    |     | Δ dalton | mass                    |  |
|                     | 98.060040319 |            | 98.060040319 | 1  | P   | 10       |                         |  |
|                     | 226.11861783 | +0.0026895 | 226.11861783 | 2  | Q   | 9        | 1250.6252767            |  |
|                     | 382.21972886 | +0.0158058 | 382.21972886 | 3  | R   | 8        | 1122.5666992 +0.2874268 |  |
|                     | 479.27249271 |            | 479.27249271 | 4  | P   | 7        | 966.46558817 -0.1369139 |  |
|                     | 566.30452112 |            | 566.30452112 | 5  | S   | 6        | 869.41282432 -0.0388009 |  |
|                     | 679.3885851  | +0.0274916 | 679.3885851  | 6  | I   | 5        | 782.38079591            |  |
| +0.1058008          | 397.21939451 | -0.0335633 | 793.43151255 | 7  | N   | 4        | 669.29673193            |  |
|                     | 921.49009006 | +0.0838235 | 921.49009006 | 8  | Q   | 3        | 555.25380448            |  |
|                     | 1088.4884489 |            | 1088.4884489 | 9  | S   | 2        | 427.19522697            |  |
|                     | 1201.5725129 | +0.1658905 | 1201.5725129 | 10 | I   | 1        | 260.19686815            |  |
|                     |              |            |              | 11 | K   | 0        | 147.11280417            |  |



Source: 20120508\_VR\_Bsu\_TripleSILACrep1\_pT1L1T2\_F05  
 Scannumber: 6218  
 Protein: BSU32260; hom; tdm  
 Peptide Score: 117.09  
 Method: ITMS; CID; 3

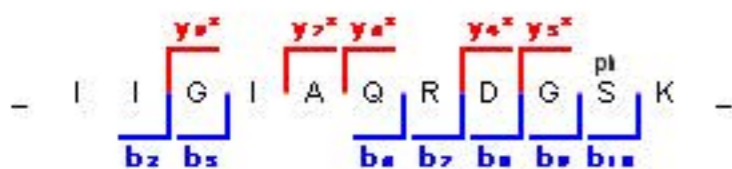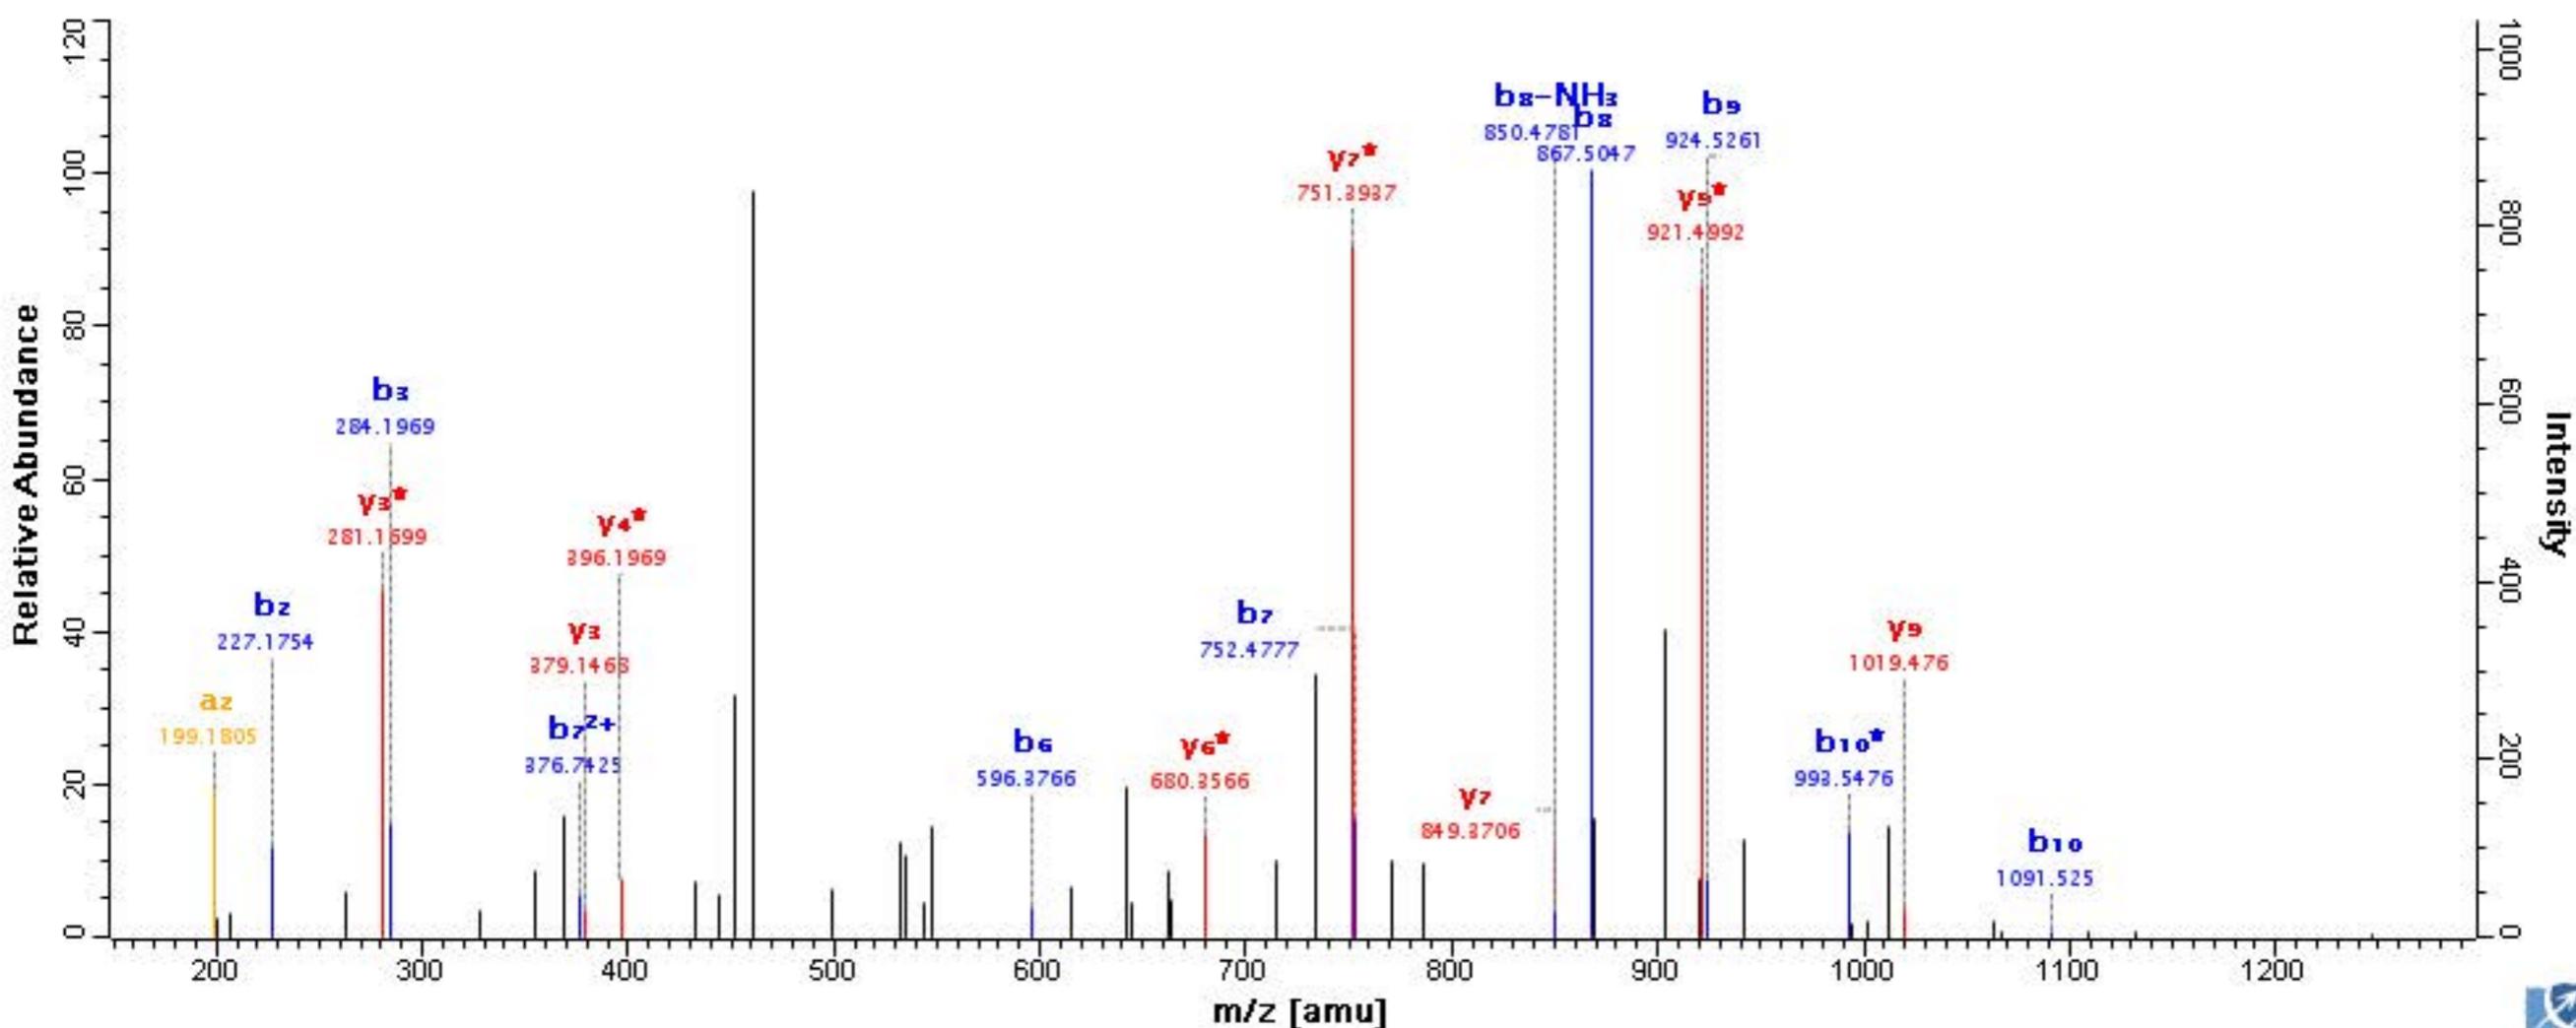

#### precursor information

|                   |                     |
|-------------------|---------------------|
| Mass:             | 1236.62298          |
| m/z:              | System.Collections. |
| Charge:           | System.Collections. |
| Retentiontime:    | System.Collections. |
| Score:            | 117.0911            |
| Mass Error [ppm]: | 0.18369             |
| PEP:              | 9.2207E-06          |
| Precursor Type:   | MULTI               |

#### general information

|                       |             |
|-----------------------|-------------|
| Annotation:           | 8 of 11     |
| AminoAcids Coverage:  | 73 %        |
| Intensity Coverage:   | 51 %        |
| Protein Localisation: | 248 ... 258 |

| a ion           |          | b <sup>2+</sup> ion |          | b ion           |          |    |     | y ion           |          |
|-----------------|----------|---------------------|----------|-----------------|----------|----|-----|-----------------|----------|
| $\Delta$ dalton | mass     | $\Delta$ dalton     | mass     | $\Delta$ dalton | mass     |    | seq | $\Delta$ dalton | mass     |
|                 | 86.09643 |                     | 114.0913 |                 | 114.0913 | 1  | I   | 10              |          |
| +0.024832       | 199.1805 |                     | 227.1754 | -0.043858       | 227.1754 | 2  | I   | 9               | 1132.56  |
|                 | 256.202  |                     | 284.1969 | +0.036774       | 284.1969 | 3  | G   | 8               | 1019.476 |
|                 | 369.286  |                     | 397.2809 |                 | 397.2809 | 4  | I   | 7               | 962.4546 |
|                 | 440.3231 |                     | 468.318  |                 | 468.318  | 5  | A   | 6               | 849.3706 |
|                 | 568.3817 |                     | 596.3766 | -0.094458       | 596.3766 | 6  | Q   | 5               | 778.3335 |
|                 | 724.4828 | -0.479383           | 376.7425 | -0.031995       | 752.4777 | 7  | R   | 4               | 650.2749 |
|                 | 839.5098 |                     | 867.5047 | -0.004677       | 867.5047 | 8  | D   | 3               | 494.1738 |
|                 | 896.5312 |                     | 924.5261 | -0.108478       | 924.5261 | 9  | G   | 2               | 379.1468 |
|                 | 1063.53  |                     | 1091.525 | +0.028234       | 1091.525 | 10 | S   | 1               | 322.1254 |
|                 |          |                     |          |                 |          | 11 | K   | 0               | 155.127  |

Source: 20120508\_VR\_Bsu\_TripleSILACrep1\_pT1L1T2\_F05  
 Scannumber: 6522  
 Protein: BSU08790; thiA; thiC  
 Peptide Score: 195.77  
 Method: ITMS; CID; 3

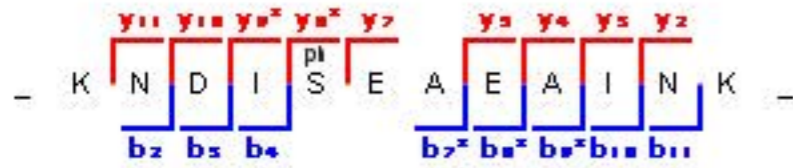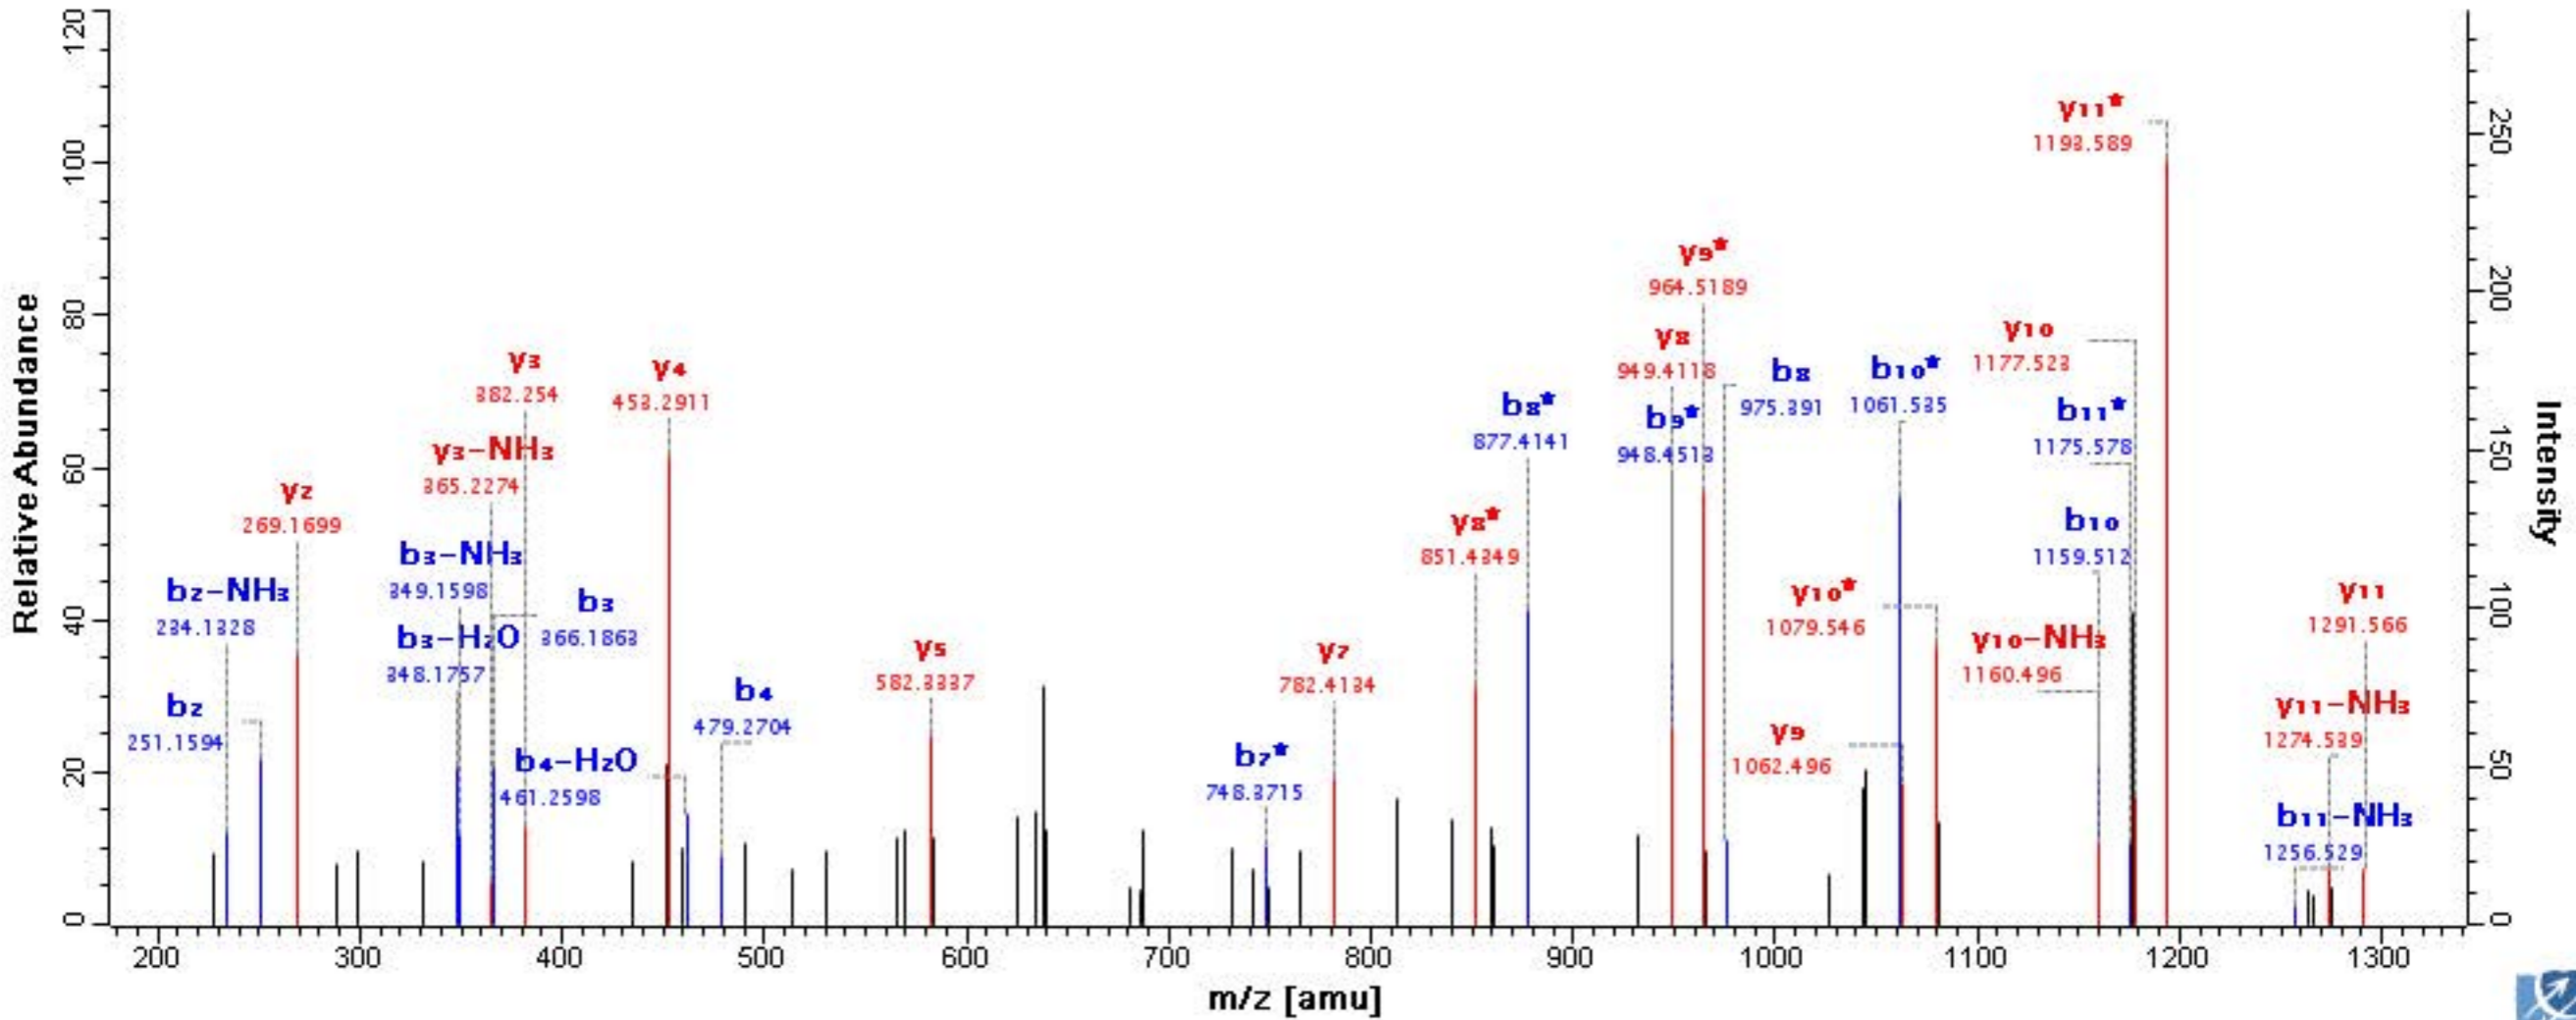

#### precursor information

|                   |                     |
|-------------------|---------------------|
| Mass:             | 1410.6391           |
| m/z:              | System.Collections. |
| Charge:           | System.Collections. |
| Retentiontime:    | System.Collections. |
| Score:            | 195.7693            |
| Mass Error [ppm]: | -0.063348           |
| PEP:              | 5.4241E-45          |
| Precursor Type:   | MULTI               |

#### general information

|                       |             |
|-----------------------|-------------|
| Annotation:           | 10 of 12    |
| AminoAcids Coverage:  | 83 %        |
| Intensity Coverage:   | 63 %        |
| Protein Localisation: | 561 ... 572 |

| b ion      |                |    |     |    | y ion          |            |
|------------|----------------|----|-----|----|----------------|------------|
| Δ dalton   | mass           |    | seq |    | Δ dalton       | mass       |
|            | 137.116438298  | 1  | K   | 11 |                |            |
| +0.1549043 | 251.159365745  | 2  | N   | 10 | 1291.565701457 | -0.2787142 |
| +0.0862742 | 366.186308777  | 3  | D   | 9  | 1177.52277401  | +0.0704877 |
| -0.0165275 | 479.270372757  | 4  | I   | 8  | 1062.495830978 | -0.0060849 |
|            | 646.268731575  | 5  | S   | 7  | 949.411766998  | +0.06211   |
|            | 775.311324672  | 6  | E   | 6  | 782.413408179  | +0.0947095 |
|            | 846.348438459  | 7  | A   | 5  | 653.370815083  |            |
| +0.1543786 | 975.391031556  | 8  | E   | 4  | 582.333701295  | +0.0395897 |
|            | 1046.428145343 | 9  | A   | 3  | 453.291108199  | -0.108491  |
| +0.1676002 | 1159.512209324 | 10 | I   | 2  | 382.253994411  | +0.0441013 |
|            | 1273.555136771 | 11 | N   | 1  | 269.169930431  | -0.0011987 |
|            |                | 12 | K   | 0  | 155.127002984  |            |

Source: 20120508\_VR\_Bsu\_TripleSILACrep1\_pT1L1T2\_F05  
 Scannumber: 8665  
 Protein: PDC174  
 Peptide Score: 149.3  
 Method: ITMS; CID; 3

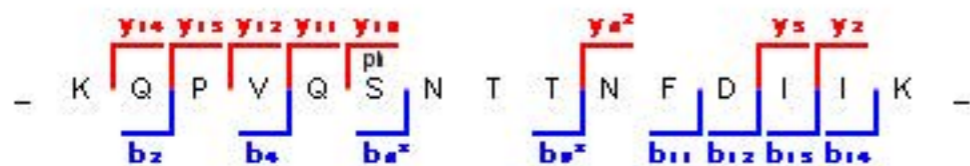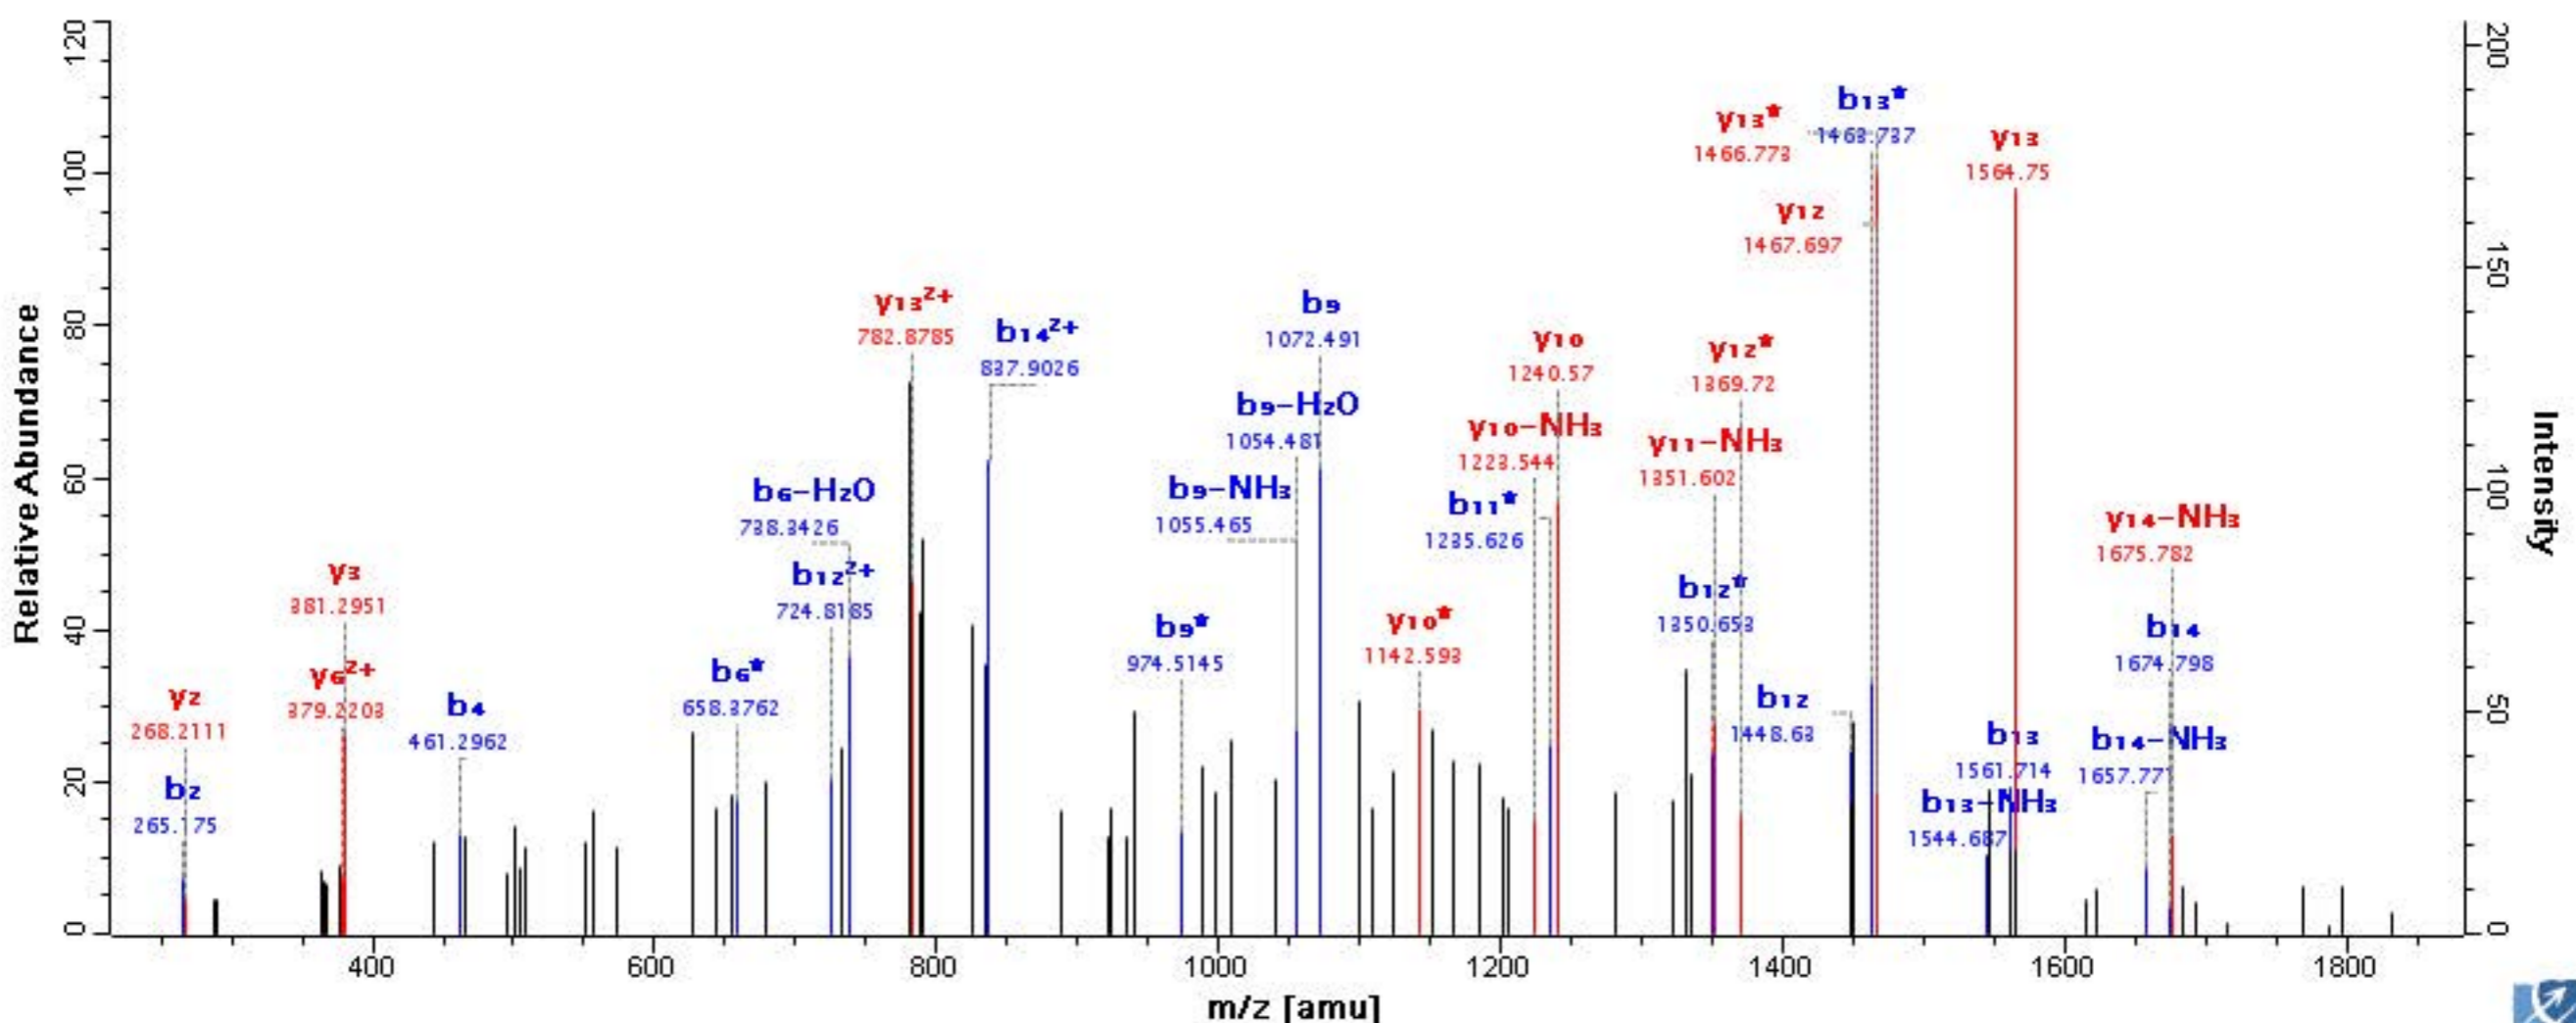

#### precursor information

|                   |                     |
|-------------------|---------------------|
| Mass:             | 1811.88232          |
| m/z:              | System.Collections. |
| Charge:           | System.Collections. |
| Retentiontime:    | System.Collections. |
| Score:            | 149.2983            |
| Mass Error [ppm]: | 0.23989             |
| PEP:              | 2.5907E-12          |
| Precursor Type:   | MULTI               |

#### general information

|                       |           |
|-----------------------|-----------|
| Annotation:           | 11 of 15  |
| AminoAcids Coverag    | 73 %      |
| Intensity Coverage:   | 45 %      |
| Protein Localisation: | 68 ... 82 |

| b <sup>2+</sup> ion |          | b ion     |          | seq |   | γ ion    |          | γ <sup>2+</sup> ion |          |
|---------------------|----------|-----------|----------|-----|---|----------|----------|---------------------|----------|
| Δ dalton            | mass     | Δ dalton  | mass     |     |   | Δ dalton | mass     | Δ dalton            | mass     |
|                     | 137.1164 |           | 137.1164 | 1   | K | 14       |          |                     |          |
|                     | 265.175  | +0.241397 | 265.175  | 2   | Q | 13       | 1692.808 |                     | 1692.808 |
|                     | 362.2278 |           | 362.2278 | 3   | P | 12       | 1564.75  | +0.004214           | 782.8785 |
|                     | 461.2962 | -0.076406 | 461.2962 | 4   | V | 11       | 1467.697 | +0.153536           | 1467.697 |
|                     | 589.3548 |           | 589.3548 | 5   | Q | 10       | 1368.629 |                     | 1368.629 |
|                     | 756.3531 |           | 756.3531 | 6   | S | 9        | 1240.57  | -0.101919           | 1240.57  |
|                     | 870.3961 |           | 870.3961 | 7   | N | 8        | 1073.572 |                     | 1073.572 |
|                     | 971.4437 |           | 971.4437 | 8   | T | 7        | 959.5288 |                     | 959.5288 |
|                     | 1072.491 | +0.071208 | 1072.491 | 9   | T | 6        | 858.4811 |                     | 858.4811 |
|                     | 1186.534 |           | 1186.534 | 10  | N | 5        | 757.4334 |                     | 379.2203 |
|                     | 1333.603 |           | 1333.603 | 11  | F | 4        | 643.3905 |                     | 643.3905 |
| +0.038751           | 724.8185 | -0.216124 | 1448.63  | 12  | D | 3        | 496.3221 |                     | 496.3221 |
|                     | 1561.714 | +0.023054 | 1561.714 | 13  | I | 2        | 381.2951 | +0.012975           | 381.2951 |
| -0.442163           | 837.9026 | +0.311182 | 1674.798 | 14  | I | 1        | 268.2111 | +0.044487           | 268.2111 |
|                     |          |           |          | 15  | K | 0        | 155.127  |                     | 155.127  |

Source: 20120508\_VR\_Bsu\_TripleSILACrep1\_pT1 L1 T2\_F05  
 Scannumber: 9421  
 Protein: BSU32750; metN; yusC  
 Peptide Score: 171.26  
 Method: ITMS; CID; 3

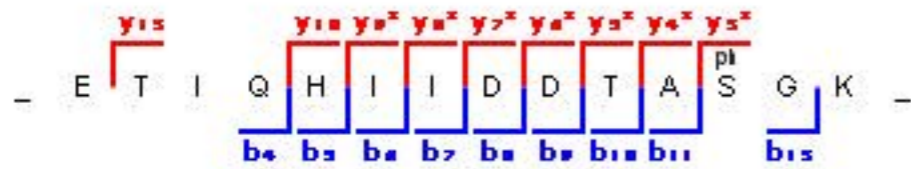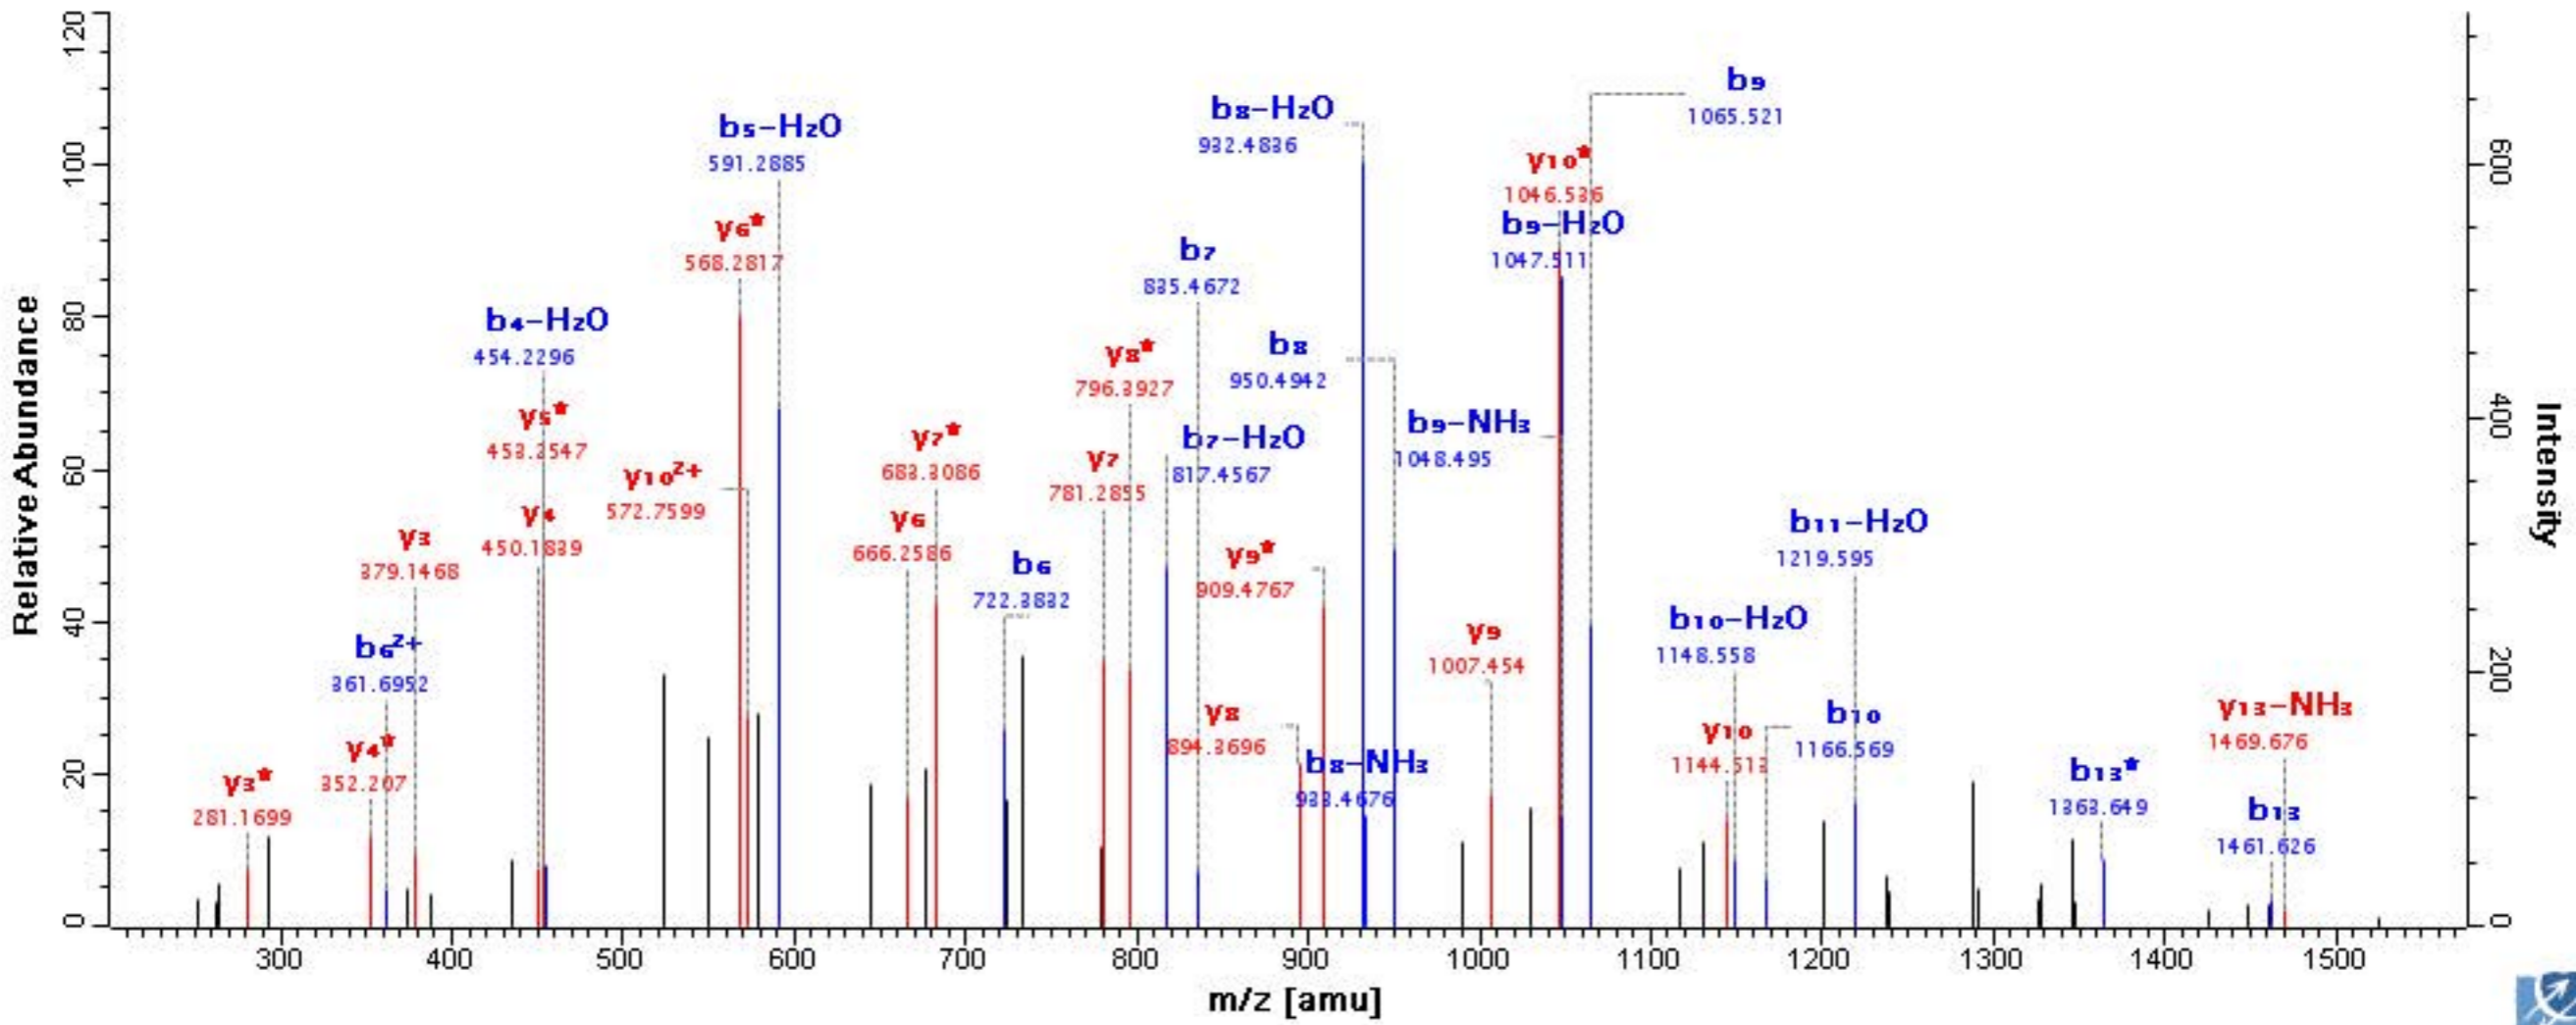

**precursor information**

|                   |                     |
|-------------------|---------------------|
| Mass:             | 1606.72448          |
| m/z:              | System.Collections. |
| Charge:           | System.Collections. |
| Retentiontime:    | System.Collections. |
| Score:            | 171.2553            |
| Mass Error [ppm]: | 0.30599             |
| PEP:              | 6.7575E-25          |
| Precursor Type:   | MULTI               |

**general information**

|                       |             |
|-----------------------|-------------|
| Annotation:           | 11 of 14    |
| AminoAcids Coverage:  | 79 %        |
| Intensity Coverage:   | 69 %        |
| Protein Localisation: | 252 ... 265 |

| b <sup>2+</sup> ion |          | b ion     |          | seq |   |    | γ ion    |           | γ <sup>2+</sup> ion |           |
|---------------------|----------|-----------|----------|-----|---|----|----------|-----------|---------------------|-----------|
| Δ dalton            | mass     | Δ dalton  | mass     |     |   |    | Δ dalton | mass      | Δ dalton            | mass      |
|                     | 130.0499 |           | 130.0499 | 1   | E | 13 |          |           |                     |           |
|                     | 231.0975 |           | 231.0975 | 2   | T | 12 | 1486.703 |           | 1486.703            |           |
|                     | 344.1816 |           | 344.1816 | 3   | I | 11 | 1385.655 |           | 1385.655            |           |
|                     | 472.2402 |           | 472.2402 | 4   | Q | 10 | 1272.571 |           | 1272.571            |           |
|                     | 609.2991 |           | 609.2991 | 5   | H | 9  | 1144.513 | -0.185639 | 572.7599            | +0.377602 |
| -0.323761           | 361.6952 | +0.012403 | 722.3832 | 6   | I | 8  | 1007.454 | +0.085187 | 1007.454            |           |
|                     | 835.4672 | +0.146479 | 835.4672 | 7   | I | 7  | 894.3696 | +0.120911 | 894.3696            |           |
|                     | 950.4942 | +0.053191 | 950.4942 | 8   | D | 6  | 781.2855 | -0.051617 | 781.2855            |           |
|                     | 1065.521 | -0.012082 | 1065.521 | 9   | D | 5  | 666.2586 | +0.140304 | 666.2586            |           |
|                     | 1166.569 | +0.063042 | 1166.569 | 10  | T | 4  | 551.2316 |           | 551.2316            |           |
|                     | 1237.606 |           | 1237.606 | 11  | A | 3  | 450.1839 | +0.212179 | 450.1839            |           |
|                     | 1404.604 |           | 1404.604 | 12  | S | 2  | 379.1468 | +0.011744 | 379.1468            |           |
|                     | 1461.626 | +0.320437 | 1461.626 | 13  | G | 1  | 212.1485 |           | 212.1485            |           |
|                     |          |           |          | 14  | K | 0  | 155.127  |           | 155.127             |           |

Source: 20120508\_VR\_Bsu\_TripleSILACrep1\_pT1L1T2\_F06  
 Scannumber: 3253  
 Protein: BSU06360; gaaA  
 Peptide Score: 79.82  
 Method: ITMS; CID; 3

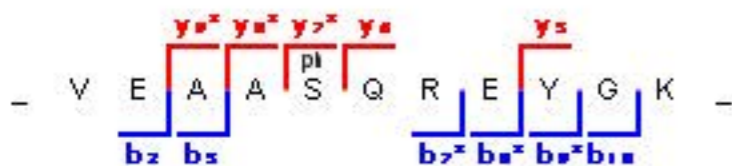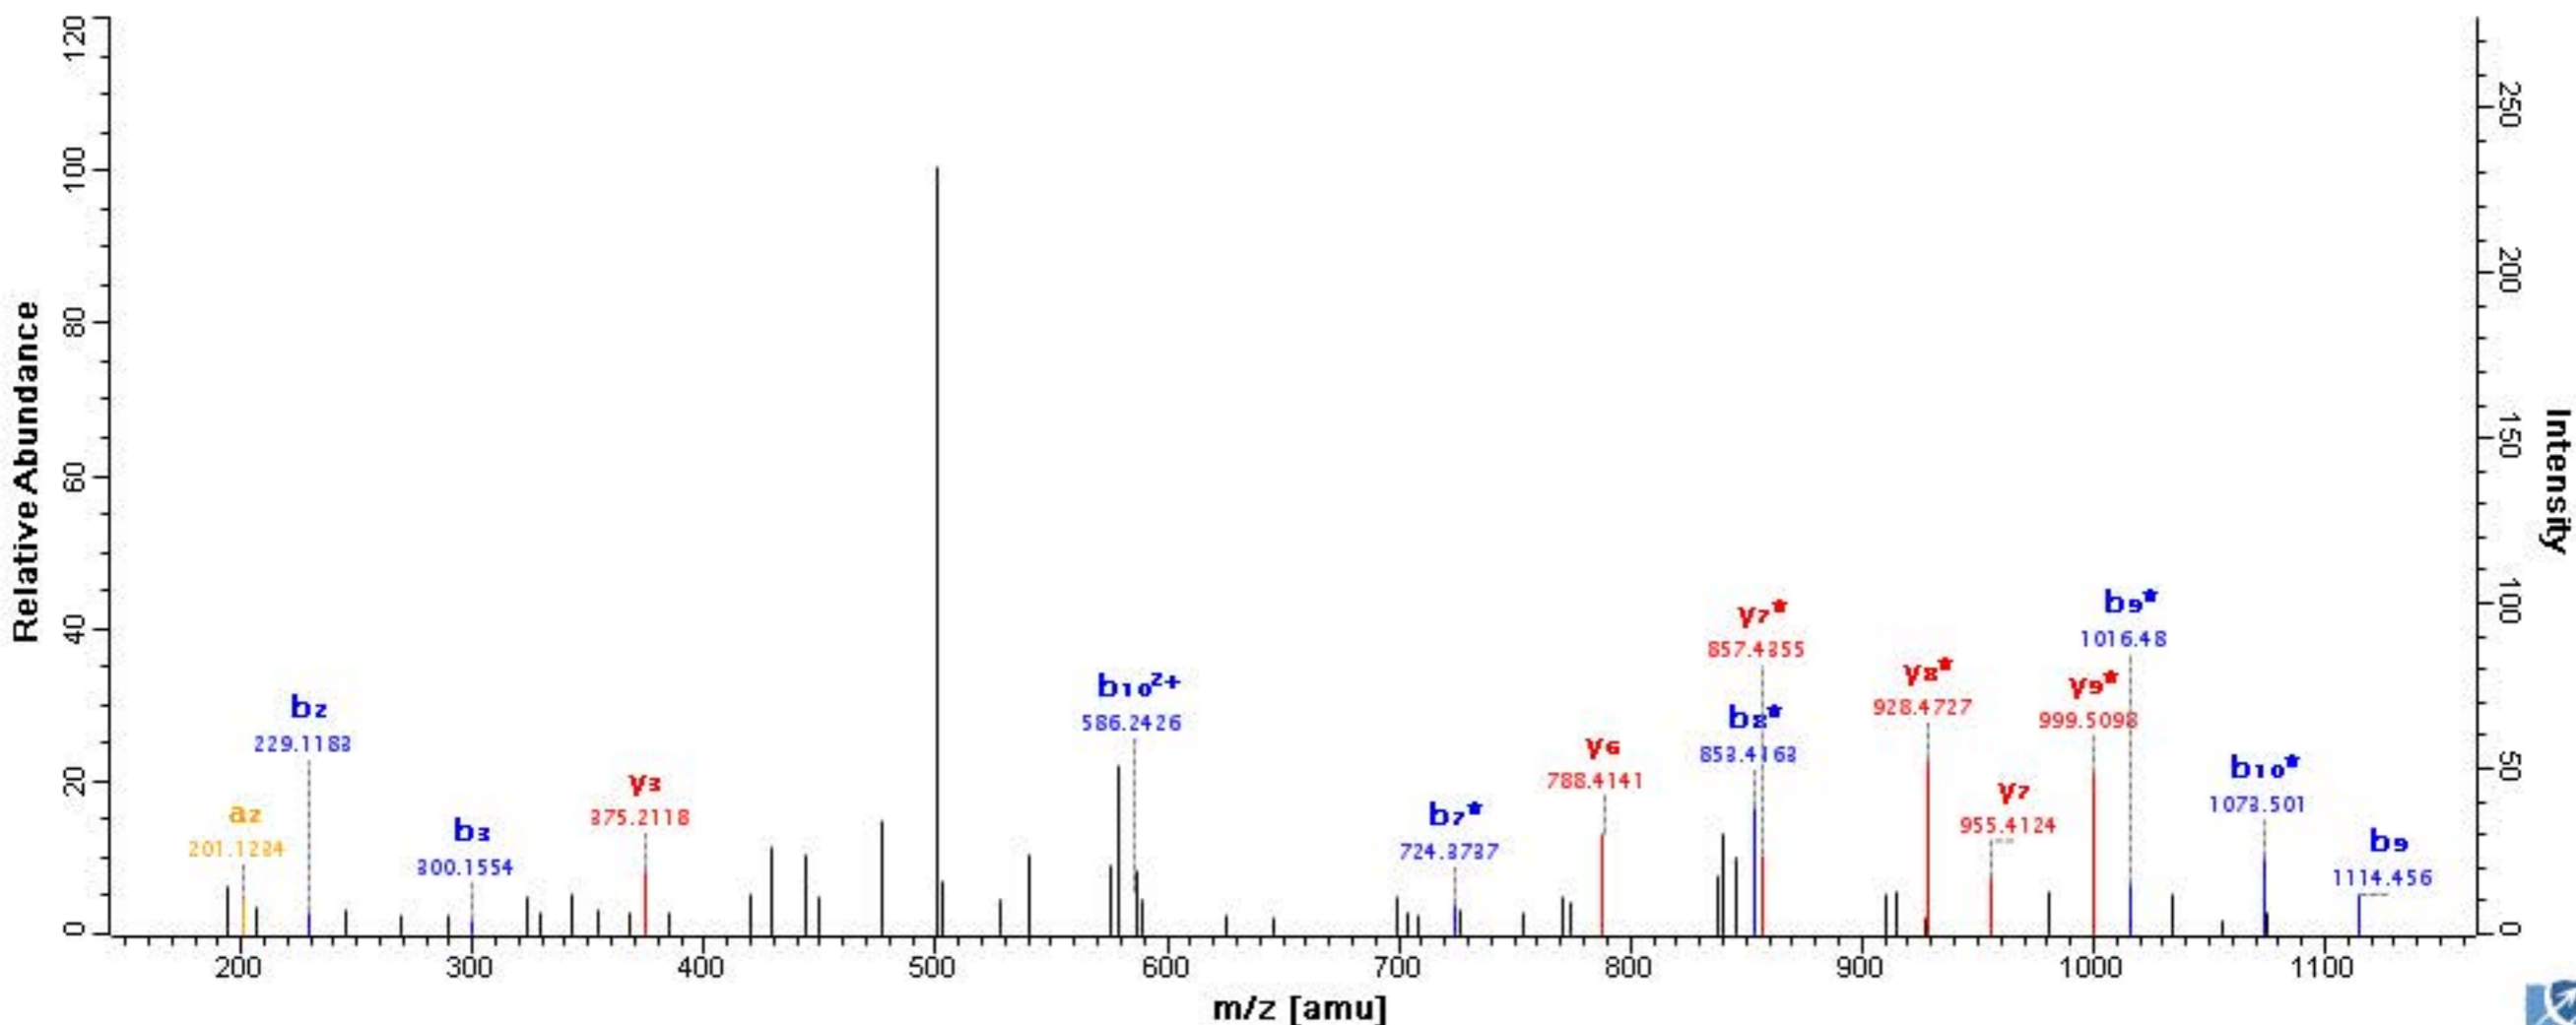

#### precursor information

|                   |                     |
|-------------------|---------------------|
| Mass:             | 1316.57639          |
| m/z:              | System.Collections. |
| Charge:           | System.Collections. |
| Retentiontime:    | System.Collections. |
| Score:            | 79.8202             |
| Mass Error [ppm]: | 0.14728             |
| PEP:              | 0.0081146           |
| Precursor Type:   | MULTI               |

#### general information

|                       |            |
|-----------------------|------------|
| Annotation:           | 9 of 11    |
| AminoAcids Coverag    | 82 %       |
| Intensity Coverage:   | 28 %       |
| Protein Localisation: | 99 ... 109 |

| a ion     |          | b <sup>2+</sup> ion |          | b ion     |          |    |     | y ion    |                    |
|-----------|----------|---------------------|----------|-----------|----------|----|-----|----------|--------------------|
| Δ dalton  | mass     | Δ dalton            | mass     | Δ dalton  | mass     |    | seq | Δ dalton | mass               |
|           | 72.08078 |                     | 100.0757 |           | 100.0757 | 1  | V   | 10       |                    |
| +0.005995 | 201.1234 |                     | 229.1183 | -0.075254 | 229.1183 | 2  | E   | 9        | 1226.529           |
|           | 272.1605 |                     | 300.1554 | -0.072695 | 300.1554 | 3  | A   | 8        | 1097.487           |
|           | 343.1976 |                     | 371.1925 |           | 371.1925 | 4  | A   | 7        | 1026.45            |
|           | 510.196  |                     | 538.1909 |           | 538.1909 | 5  | S   | 6        | 955.4124 -0.070578 |
|           | 638.2545 |                     | 666.2494 |           | 666.2494 | 6  | Q   | 5        | 788.4141 -0.042068 |
|           | 794.3556 |                     | 822.3506 |           | 822.3506 | 7  | R   | 4        | 660.3555           |
|           | 923.3982 |                     | 951.3932 |           | 951.3932 | 8  | E   | 3        | 504.2544           |
|           | 1086.462 |                     | 1114.456 | +0.204531 | 1114.456 | 9  | Y   | 2        | 375.2118 -0.172183 |
|           | 1143.483 | +0.156255           | 586.2426 |           | 1171.478 | 10 | G   | 1        | 212.1485           |
|           |          |                     |          |           |          | 11 | K   | 0        | 155.127            |

Source: 20120508\_VR\_Bsu\_TripleSILACrep1\_pT1L1T2\_F07  
 Scannumber: 4519  
 Protein: BSU36250; ywqD  
 Peptide Score: 143.03  
 Method: ITMS; CID; 3

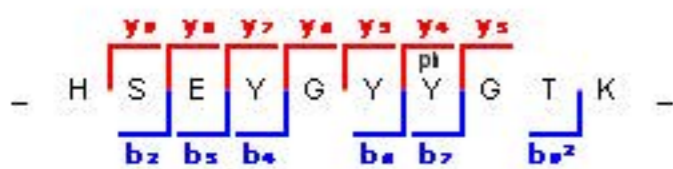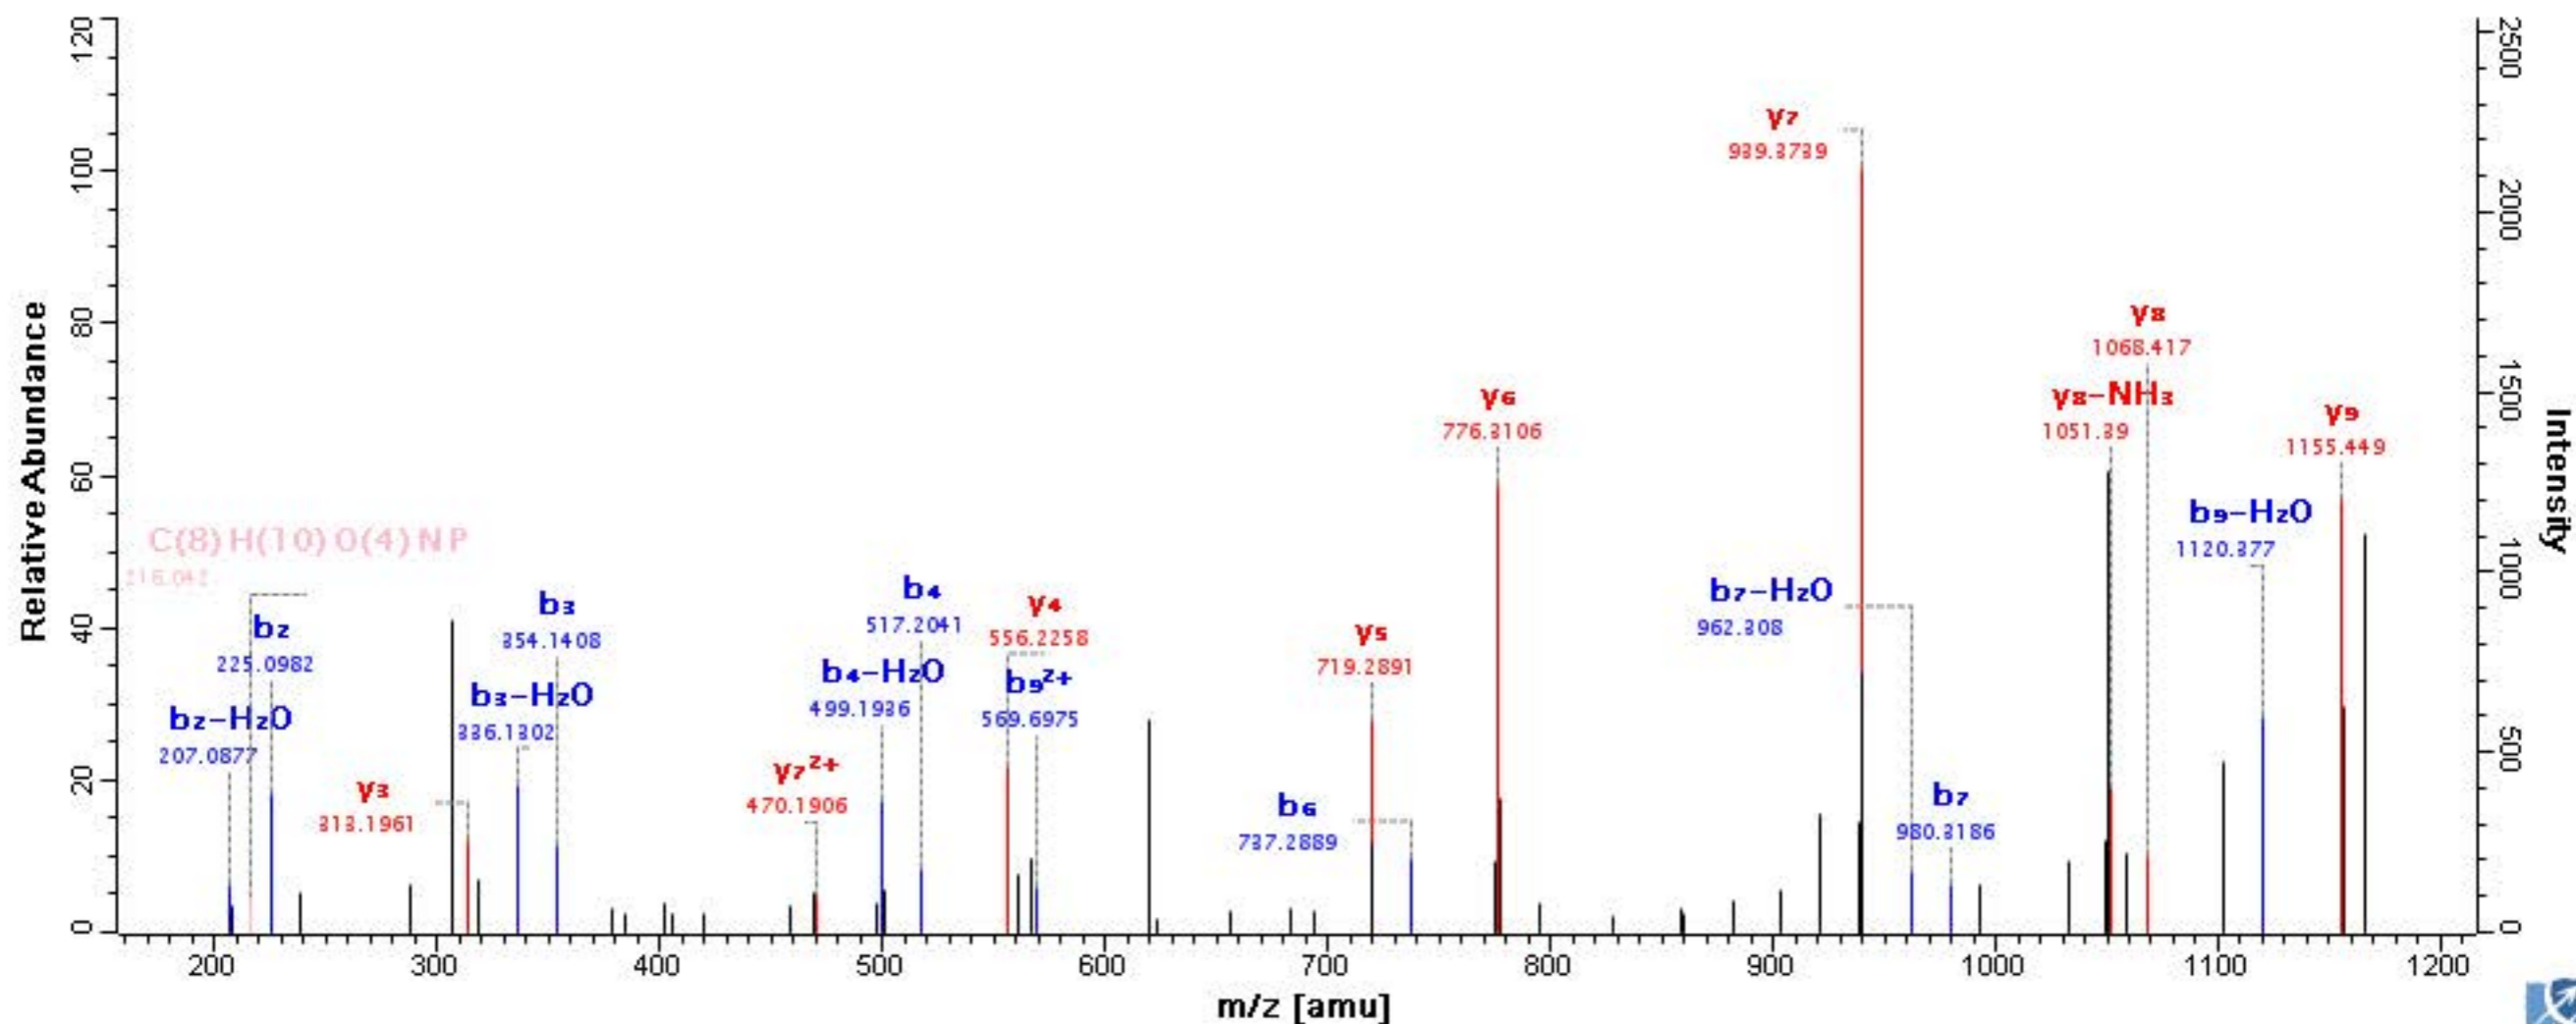

#### precursor information

|                   |                     |
|-------------------|---------------------|
| Mass:             | 1283.48596          |
| m/z:              | System.Collections. |
| Charge:           | System.Collections. |
| Retentiontime:    | System.Collections. |
| Score:            | 143.0338            |
| Mass Error [ppm]: | -0.013992           |
| PEP:              | 1.1605E-08          |
| Precursor Type:   | MULTI               |

#### general information

|                       |             |
|-----------------------|-------------|
| Annotation:           | 8 of 10     |
| AminoAcids Coverage:  | 80 %        |
| Intensity Coverage:   | 48 %        |
| Protein Localisation: | 222 ... 231 |

| b <sup>2+</sup> ion |          | b ion     |          |     | y ion |          | y <sup>2+</sup> ion |           |          |           |
|---------------------|----------|-----------|----------|-----|-------|----------|---------------------|-----------|----------|-----------|
| Δ dalton            | mass     | Δ dalton  | mass     | seq |       | Δ dalton | mass                | Δ dalton  | mass     |           |
|                     | 138.0662 |           | 138.0662 | 1   | H     | 9        |                     |           |          |           |
|                     | 225.0982 | +0.059712 | 225.0982 | 2   | S     | 8        | 1155.449            | +0.057679 | 1155.449 |           |
|                     | 354.1408 | -0.021608 | 354.1408 | 3   | E     | 7        | 1068.417            | -0.077651 | 1068.417 |           |
|                     | 517.2041 | +0.135095 | 517.2041 | 4   | Y     | 6        | 939.3739            | +0.010169 | 470.1906 | -0.025806 |
|                     | 574.2256 |           | 574.2256 | 5   | G     | 5        | 776.3106            | +0.146313 | 776.3106 |           |
|                     | 737.2889 | +0.014414 | 737.2889 | 6   | Y     | 4        | 719.2891            | +0.11669  | 719.2891 |           |
|                     | 980.3186 | -0.02263  | 980.3186 | 7   | Y     | 3        | 556.2258            | +0.118495 | 556.2258 |           |
|                     | 1037.34  |           | 1037.34  | 8   | G     | 2        | 313.1961            | +0.027152 | 313.1961 |           |
| -0.136652           | 569.6975 |           | 1138.388 | 9   | T     | 1        | 256.1747            |           | 256.1747 |           |
|                     |          |           |          | 10  | K     | 0        | 155.127             |           | 155.127  |           |

Source: 20120508\_VR\_Bsu\_TripleSILACrep1\_pT1L1T2\_F07  
 Scannumber: 5120  
 Protein: BSU16690; comR; pnp; pnpA  
 Peptide Score: 110.66  
 Method: ITMS; CID; 3

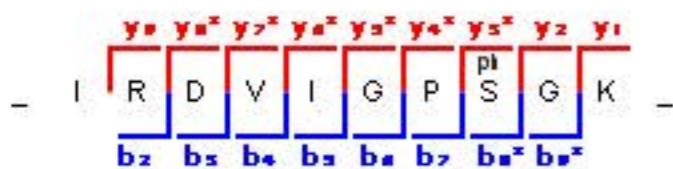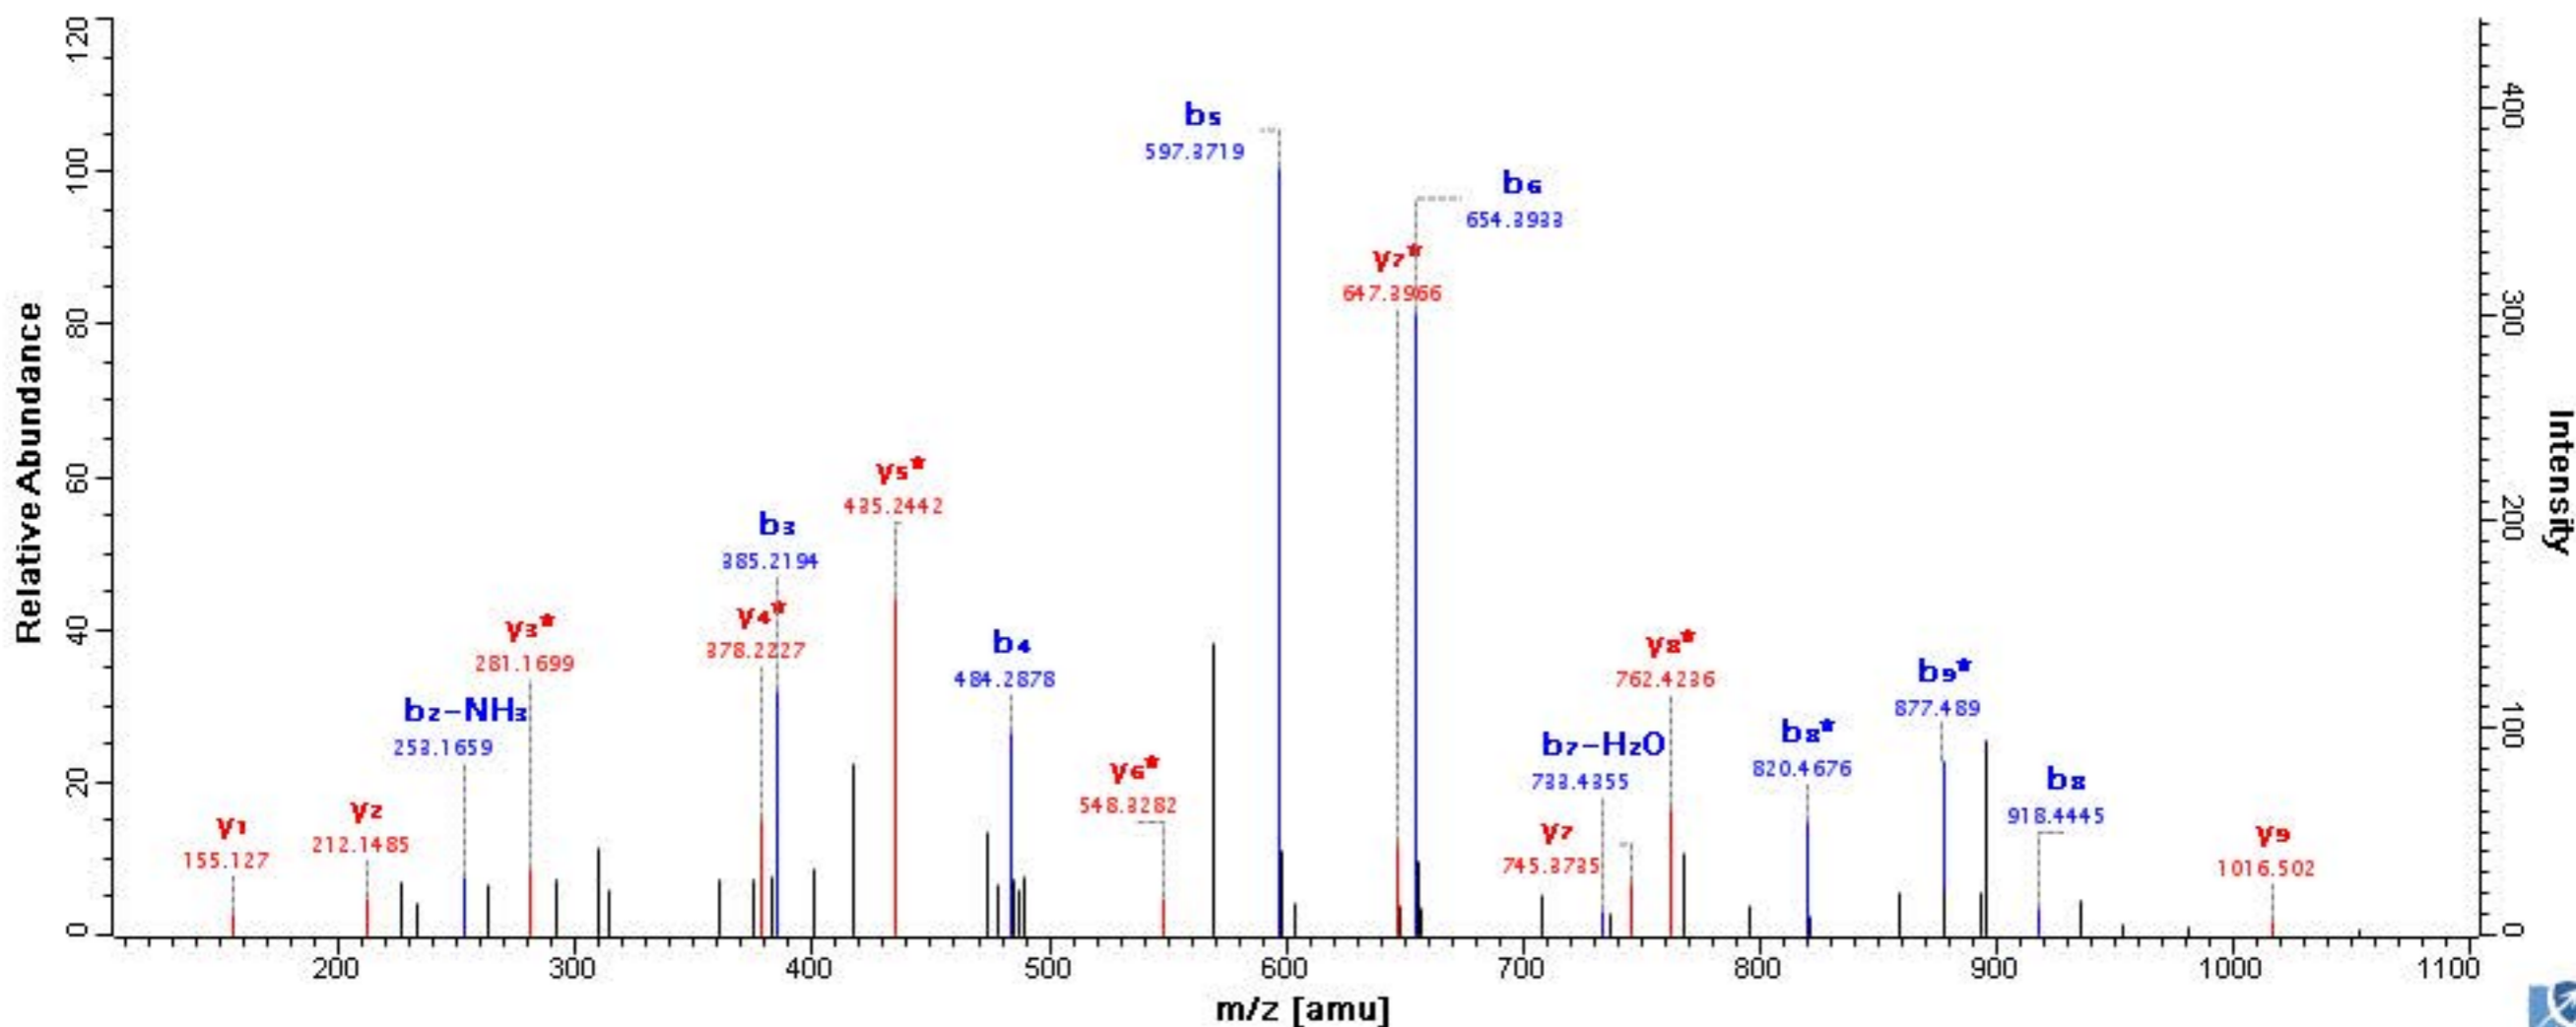

#### precursor information

|                   |                     |
|-------------------|---------------------|
| Mass:             | 1120.56456          |
| m/z:              | System.Collections. |
| Charge:           | System.Collections. |
| Retentiontime:    | System.Collections. |
| Score:            | 110.6616            |
| Mass Error [ppm]: | 0.34429             |
| PEP:              | 0.00078702          |
| Precursor Type:   | MULTI               |

#### general information

|                       |             |
|-----------------------|-------------|
| Annotation:           | 9 of 10     |
| AminoAcids Coverage:  | 90 %        |
| Intensity Coverage:   | 59 %        |
| Protein Localisation: | 566 ... 575 |

| b ion           |               |    |     |   |                 | y ion      |  |
|-----------------|---------------|----|-----|---|-----------------|------------|--|
| $\Delta$ dalton | mass          |    | seq |   | $\Delta$ dalton | mass       |  |
|                 | 114.091340447 | 1  | I   | 9 |                 |            |  |
|                 | 270.192451475 | 2  | R   | 8 | 1016.501585058  | -0.1719952 |  |
| +0.0629541      | 385.219394507 | 3  | D   | 7 | 860.40047403    |            |  |
| -0.3315096      | 484.287808423 | 4  | V   | 6 | 745.373530998   | -0.0018269 |  |
| -0.0303197      | 597.371872404 | 5  | I   | 5 | 646.305117082   |            |  |
| +0.047826       | 654.393336127 | 6  | G   | 4 | 533.221053101   |            |  |
|                 | 751.446099979 | 7  | P   | 3 | 476.199589378   |            |  |
| -0.1326302      | 918.444458798 | 8  | S   | 2 | 379.146825526   |            |  |
|                 | 975.465922521 | 9  | G   | 1 | 212.148466707   | -0.0124651 |  |
|                 |               | 10 | K   | 0 | 155.127002984   | +0.1198842 |  |

Source: 20120508\_VR\_Bsu\_TripleSILACrep1\_pT1L1T2\_F07  
 Scannumber: 6182  
 Protein: BSU15420; divIVA; ylmJ  
 Peptide Score: 110.92  
 Method: ITMS; CID; 3

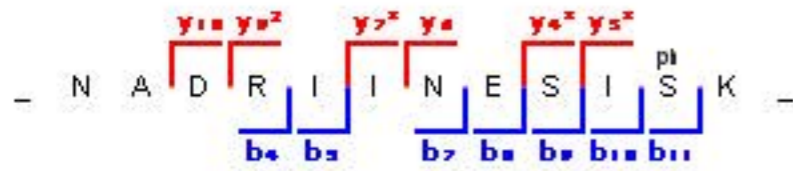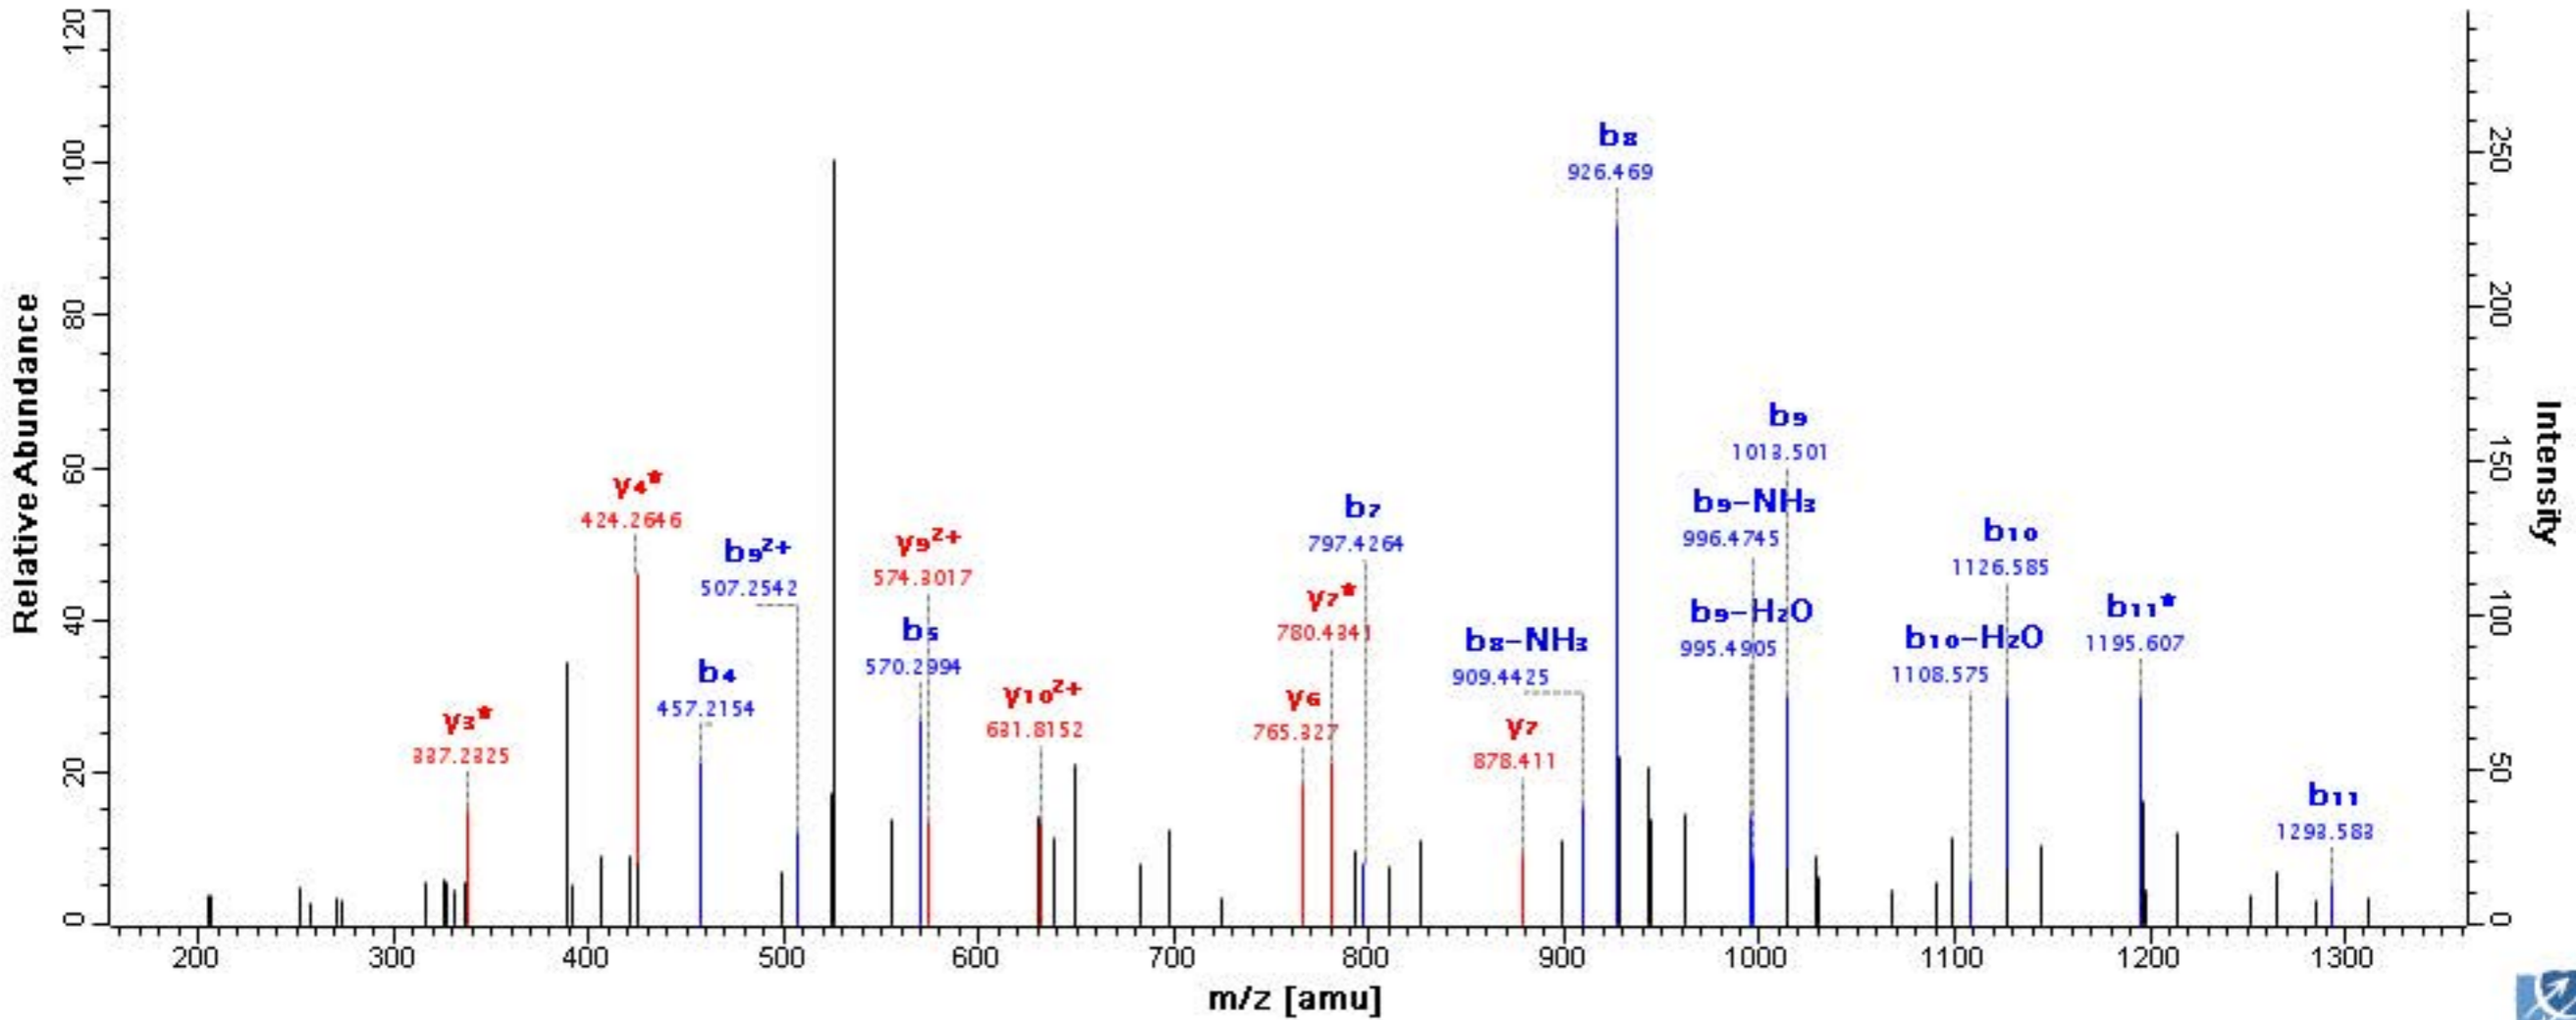

#### precursor information

|                   |                     |
|-------------------|---------------------|
| Mass:             | 1438.68238          |
| m/z:              | System.Collections. |
| Charge:           | System.Collections. |
| Retentiontime:    | System.Collections. |
| Score:            | 110.9227            |
| Mass Error [ppm]: | 0.45153             |
| PEP:              | 3.2744E-05          |
| Precursor Type:   | MULTI               |

#### general information

|                       |            |
|-----------------------|------------|
| Annotation:           | 9 of 12    |
| AminoAcids Coverag    | 75 %       |
| Intensity Coverage:   | 44 %       |
| Protein Localisation: | 99 ... 110 |

| b <sup>2+</sup> ion |          | b ion     |          |    | seq |    | y ion    |           | y <sup>2+</sup> ion |           |
|---------------------|----------|-----------|----------|----|-----|----|----------|-----------|---------------------|-----------|
| Δ dalton            | mass     | Δ dalton  | mass     |    |     |    | Δ dalton | mass      | Δ dalton            | mass      |
|                     | 115.0502 |           | 115.0502 | 1  | N   | 11 |          |           |                     |           |
|                     | 186.0873 |           | 186.0873 | 2  | A   | 10 | 1333.66  |           | 1333.66             |           |
|                     | 301.1143 |           | 301.1143 | 3  | D   | 9  | 1262.623 |           | 631.8152            | +0.256317 |
|                     | 457.2154 | -0.17991  | 457.2154 | 4  | R   | 8  | 1147.596 |           | 574.3017            | +0.058912 |
|                     | 570.2994 | +0.161075 | 570.2994 | 5  | I   | 7  | 991.4951 |           | 991.4951            |           |
|                     | 683.3835 |           | 683.3835 | 6  | I   | 6  | 878.411  | -0.218412 | 878.411             |           |
|                     | 797.4264 | -0.472204 | 797.4264 | 7  | N   | 5  | 765.327  | +0.109366 | 765.327             |           |
|                     | 926.469  | -0.017421 | 926.469  | 8  | E   | 4  | 651.284  |           | 651.284             |           |
| +0.041126           | 507.2542 | +0.15038  | 1013.501 | 9  | S   | 3  | 522.2415 |           | 522.2415            |           |
|                     | 1126.585 | +0.018525 | 1126.585 | 10 | I   | 2  | 435.2094 |           | 435.2094            |           |
|                     | 1293.583 | +0.029444 | 1293.583 | 11 | S   | 1  | 322.1254 |           | 322.1254            |           |
|                     |          |           |          | 12 | K   | 0  | 155.127  |           | 155.127             |           |



Source: 20120508\_VR\_Bsu\_TripleSILACrep1\_pT1L1T2\_F07  
 Scannumber: 6444  
 Protein: BSU15770; prkC; yloP  
 Peptide Score: 196.5  
 Method: ITMS; CID; 3

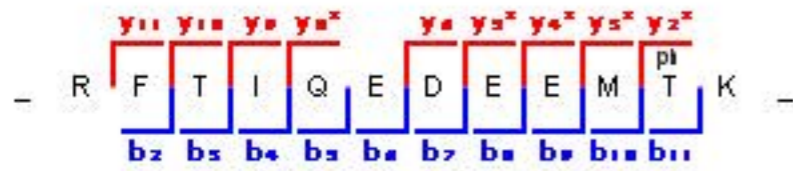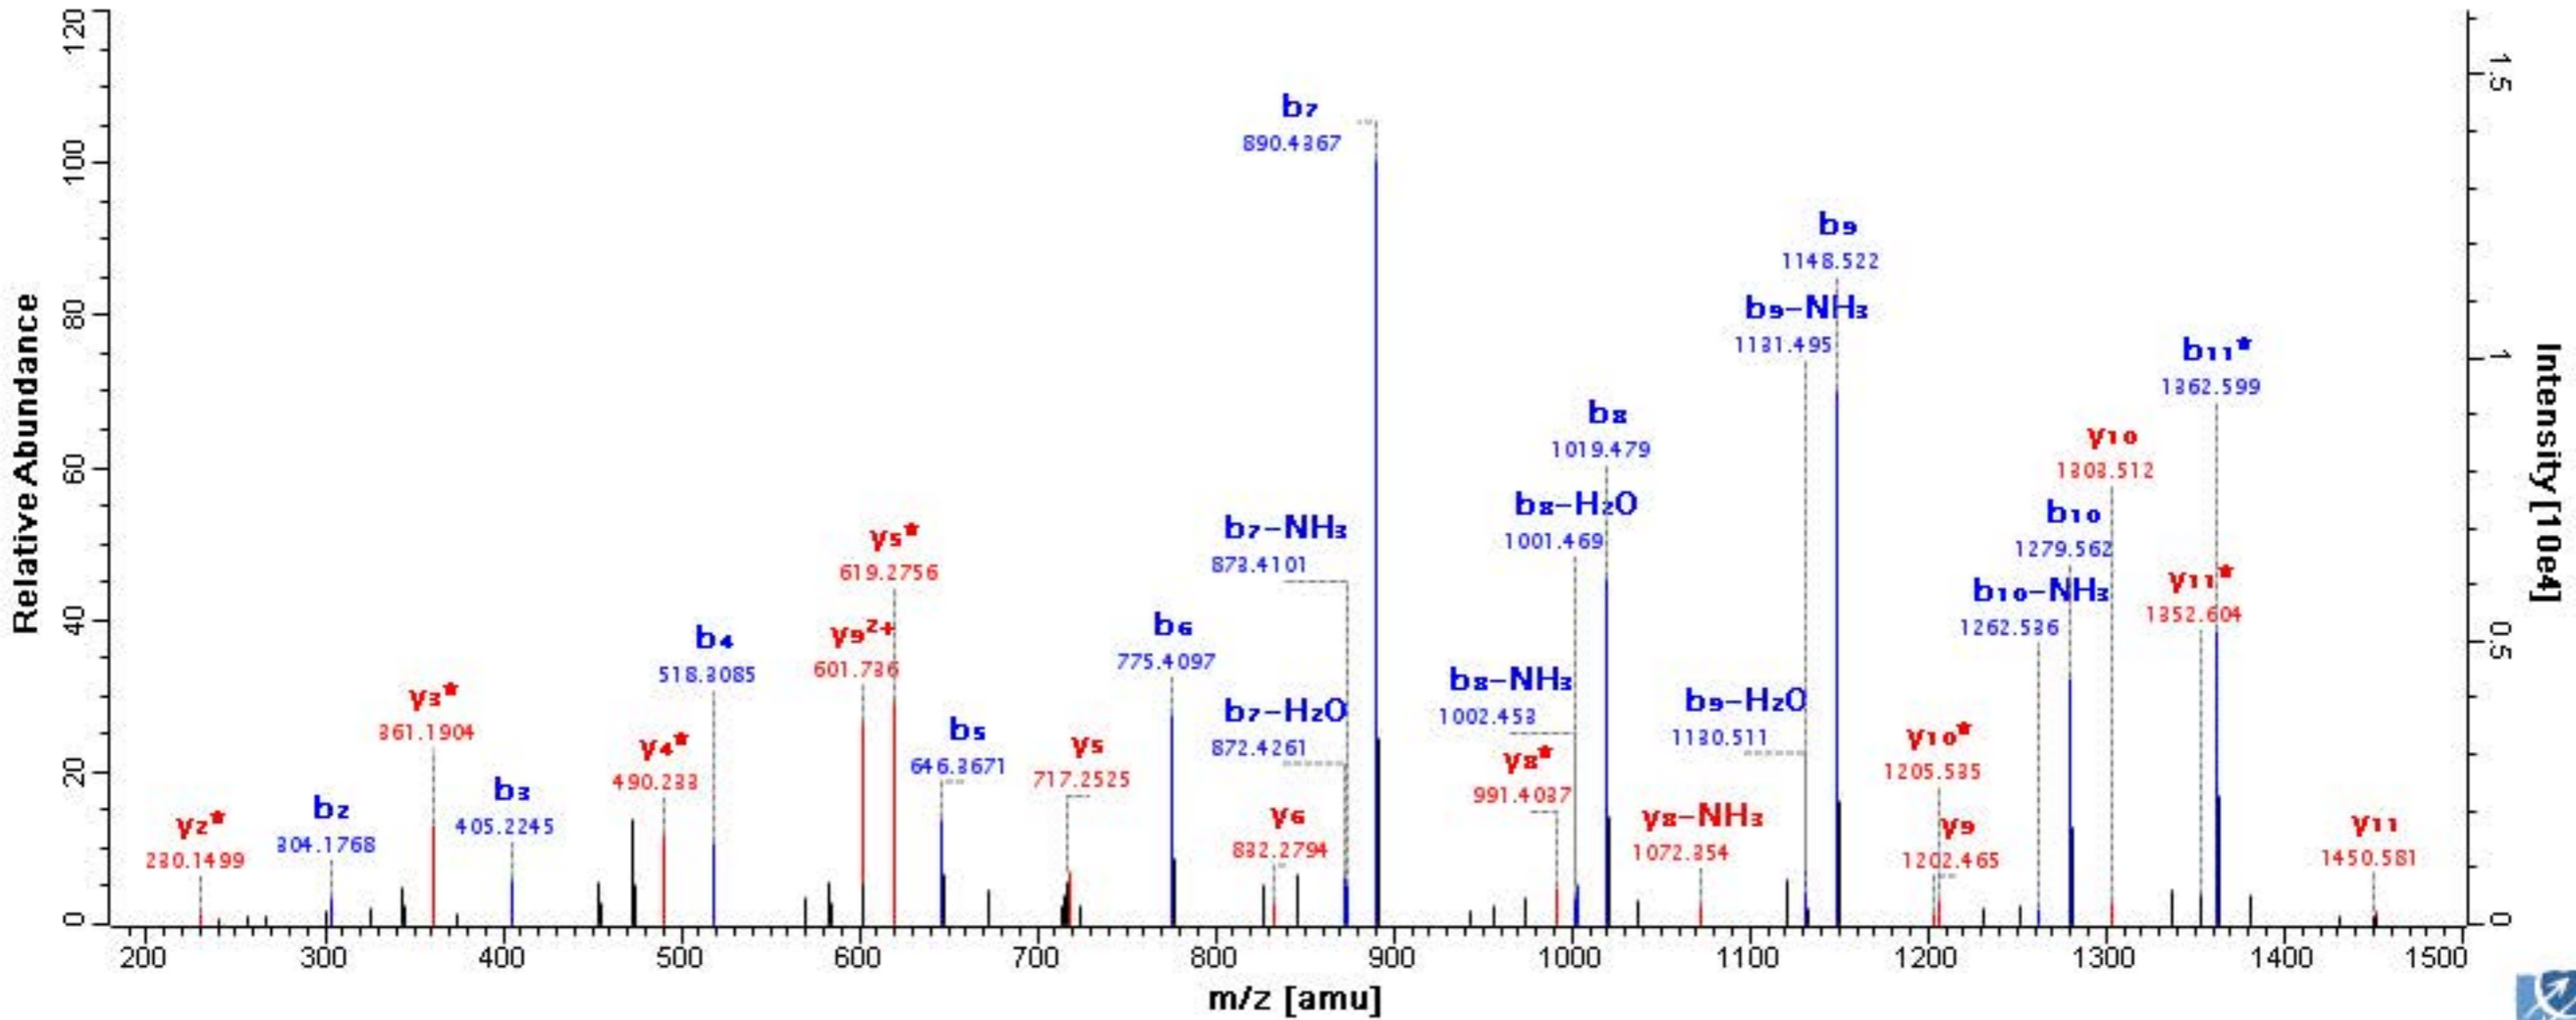

**precursor information**

|                   |                     |
|-------------------|---------------------|
| Mass:             | 0                   |
| m/z:              | System.Collections. |
| Charge:           | System.Collections. |
| Retentiontime:    | System.Collections. |
| Score:            | 196.4965            |
| Mass Error [ppm]: | 0.15906             |
| PEP:              | 4.3146E-178         |
| Precursor Type:   | PEAK                |

**general information**

|                       |             |
|-----------------------|-------------|
| Annotation:           | 10 of 12    |
| AminoAcids Coverage:  | 83 %        |
| Intensity Coverage:   | 68 %        |
| Protein Localisation: | 280 ... 291 |

| b ion      |              |    |     |    | γ ion        |            | γ <sup>2+</sup> ion |           |
|------------|--------------|----|-----|----|--------------|------------|---------------------|-----------|
| Δ dalton   | mass         |    | seq |    | Δ dalton     | mass       | Δ dalton            | mass      |
|            | 157.10838749 | 1  | R   | 11 |              |            |                     |           |
| +0.0208304 | 304.17680141 | 2  | F   | 10 | 1450.5807539 | +0.2839922 | 1450.5807539        |           |
| -0.0186693 | 405.22447988 | 3  | T   | 9  | 1303.5123399 | +0.1296278 | 1303.5123399        |           |
| +0.1177257 | 518.30854387 | 4  | I   | 8  | 1202.4646615 | +0.1040641 | 601.73596897        | -0.426948 |
| +0.0948537 | 646.36712138 | 5  | Q   | 7  | 1089.3805975 |            | 1089.3805975        |           |
| +0.0622704 | 775.40971447 | 6  | E   | 6  | 961.32201998 |            | 961.32201998        |           |
| +0.0753664 | 890.43665751 | 7  | D   | 5  | 832.27942688 | -0.0933307 | 832.27942688        |           |
| +0.006162  | 1019.4792506 | 8  | E   | 4  | 717.25248385 | +0.200458  | 717.25248385        |           |
| +0.1190254 | 1148.5218437 | 9  | E   | 3  | 588.20989076 |            | 588.20989076        |           |
| +0.1576424 | 1279.5623283 | 10 | M   | 2  | 459.16729766 |            | 459.16729766        |           |
|            | 1460.5763372 | 11 | T   | 1  | 328.12681305 |            | 328.12681305        |           |
|            |              | 12 | K   | 0  | 147.11280417 |            | 147.11280417        |           |

Source: 20120508\_VR\_Bsu\_TripleSILACrep1\_pT1L1T2\_F09  
 Scannumber: 3720  
 Protein: BSU02590; ycbP  
 Peptide Score: 108.43  
 Method: ITMS; CID; 3

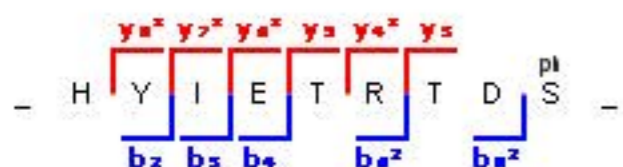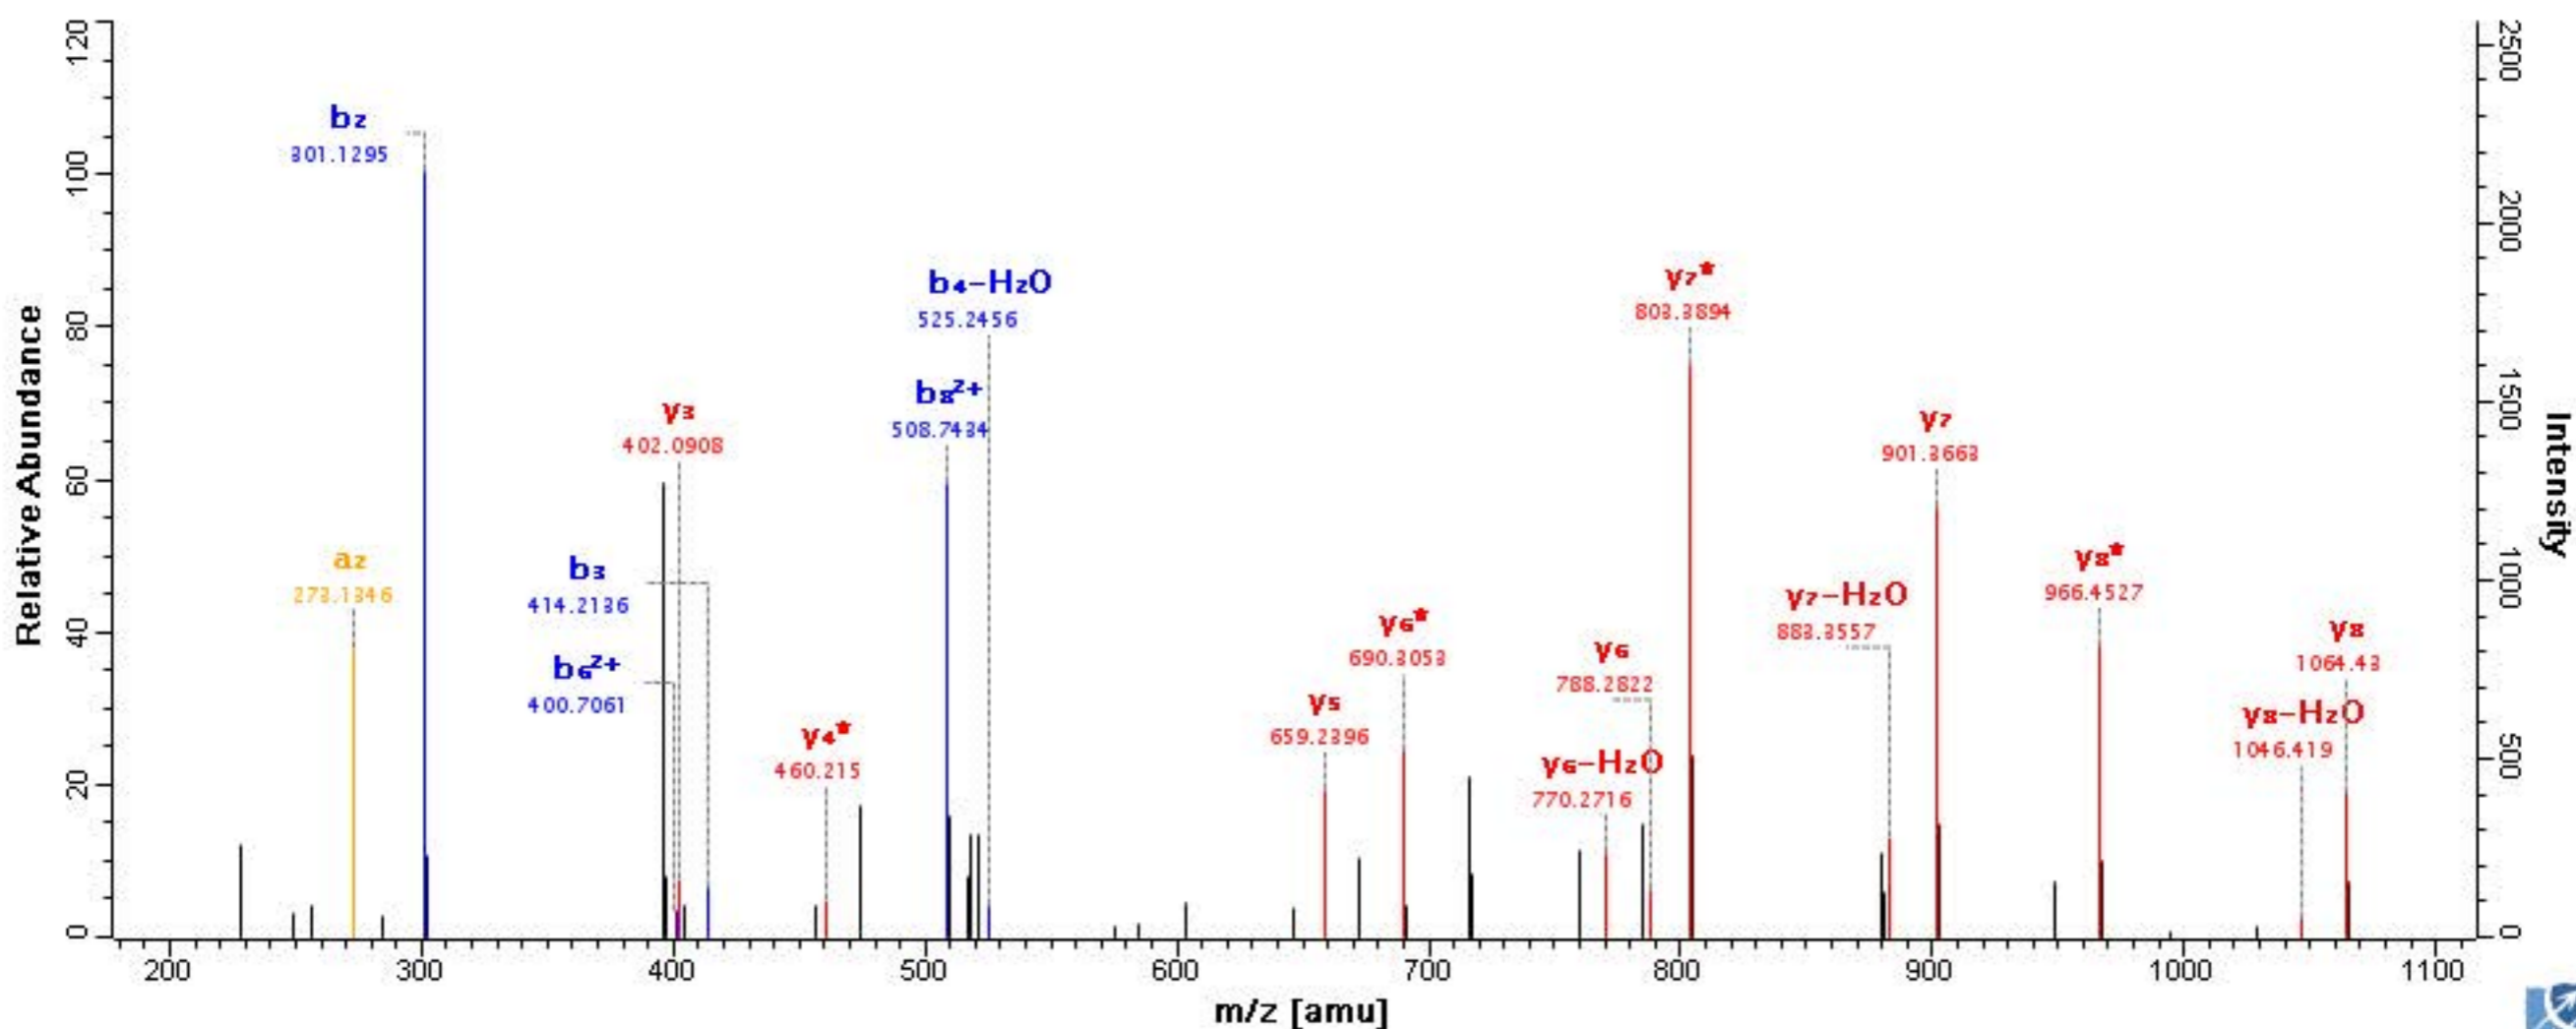

**precursor information**

|                          |                     |
|--------------------------|---------------------|
| Mass:                    | 1200.48108          |
| m/z:                     | System.Collections. |
| Charge:                  | System.Collections. |
| Retentiontime:           | System.Collections. |
| Score:                   | 108.433             |
| Mass Error [ppm]:        | -0.12927            |
| PEP:                     | 0.0031622           |
| <b>g</b> Precursor Type: | ISO                 |
| Annotation:              | 7 of 9              |
| AminoAcids Coverag       | 78 %                |
| Intensity Coverage:      | 59 %                |
| Protein Localisation:    | 120 ... 128         |

| a ion     |          | b <sup>2+</sup> ion |          | b ion     |          |   |     | y ion    |          |
|-----------|----------|---------------------|----------|-----------|----------|---|-----|----------|----------|
| Δ dalton  | mass     | Δ dalton            | mass     | Δ dalton  | mass     |   | seq | Δ dalton | mass     |
|           | 110.0713 |                     | 138.0662 |           | 138.0662 | 1 | H   | 8        |          |
| +0.095134 | 273.1346 |                     | 301.1295 | -0.034668 | 301.1295 | 2 | Y   | 7        | 1064.43  |
|           | 386.2187 |                     | 414.2136 | +0.012371 | 414.2136 | 3 | I   | 6        | 901.3663 |
|           | 515.2613 |                     | 543.2562 |           | 543.2562 | 4 | E   | 5        | 788.2822 |
|           | 616.3089 |                     | 644.3039 |           | 644.3039 | 5 | T   | 4        | 659.2396 |
|           | 772.41   | +0.19128            | 400.7061 |           | 800.405  | 6 | R   | 3        | 558.1919 |
|           | 873.4577 |                     | 901.4526 |           | 901.4526 | 7 | T   | 2        | 402.0908 |
|           | 988.4847 | +0.008889           | 508.7434 |           | 1016.48  | 8 | D   | 1        | 301.0431 |
|           |          |                     |          |           |          | 9 | S   | 0        | 186.0162 |

Source: 20120508\_VR\_Bsu\_TripleSILACrep1\_pT1L1T2\_F09  
 Scannumber: 4494  
 Protein: BSU38020; ipa-52r; pdxK; ywdB  
 Peptide Score: 162.38  
 Method: ITMS; CID; 3

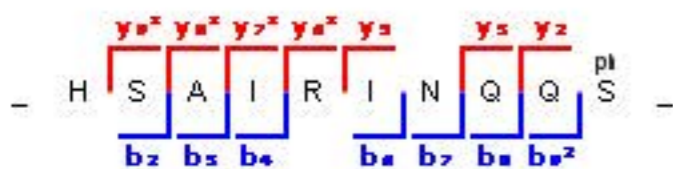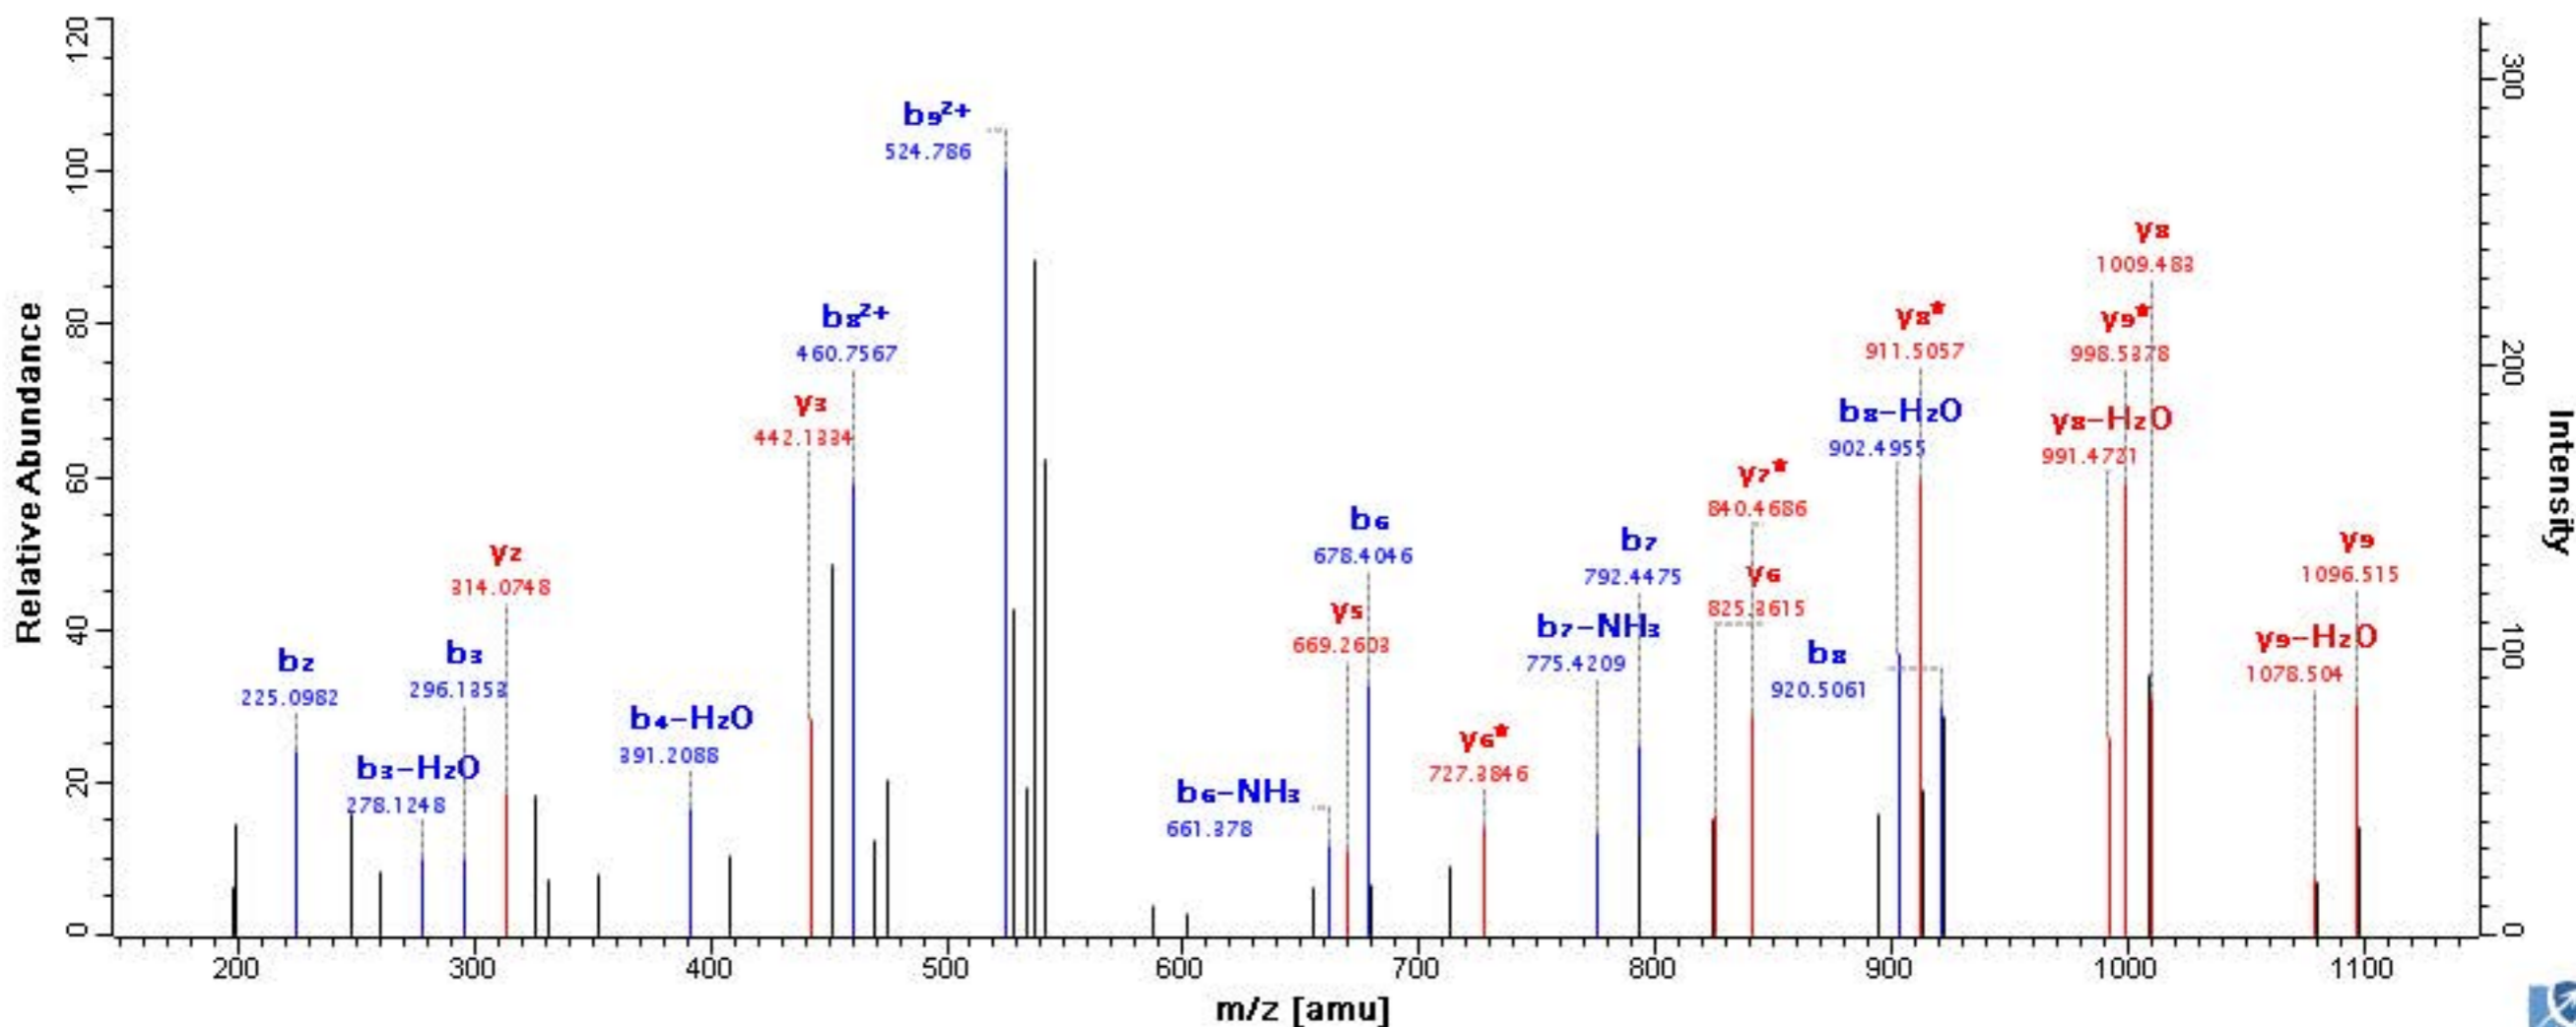

**precursor information**

|                   |                     |
|-------------------|---------------------|
| Mass:             | 1232.56624          |
| m/z:              | System.Collections. |
| Charge:           | System.Collections. |
| Retentiontime:    | System.Collections. |
| Score:            | 162.3797            |
| Mass Error [ppm]: | -0.04469            |
| PEP:              | 7.1815E-26          |
| Precursor Type:   | ISO                 |

**general information**

|                       |             |
|-----------------------|-------------|
| Annotation:           | 8 of 10     |
| AminoAcids Coverage:  | 80 %        |
| Intensity Coverage:   | 56 %        |
| Protein Localisation: | 262 ... 271 |

| b <sup>2+</sup> ion |              | b ion      |              |     | y ion    |      |              |
|---------------------|--------------|------------|--------------|-----|----------|------|--------------|
| Δ dalton            | mass         | Δ dalton   | mass         | seq | Δ dalton | mass |              |
|                     | 138.06618833 |            | 138.06618833 | 1   | H        | 9    |              |
|                     | 225.09821674 | +0.0562938 | 225.09821674 | 2   | S        | 8    | 1096.5146636 |
|                     | 296.13533053 | +0.0359646 | 296.13533053 | 3   | A        | 7    | 1009.4826352 |
|                     | 409.21939451 |            | 409.21939451 | 4   | I        | 6    | 938.44552143 |
|                     | 565.32050554 |            | 565.32050554 | 5   | R        | 5    | 825.36145745 |
|                     | 678.40456952 | -0.035673  | 678.40456952 | 6   | I        | 4    | 669.26034642 |
|                     | 792.44749696 | +0.130506  | 792.44749696 | 7   | N        | 3    | 556.17628244 |
| -0.2273176          | 460.75667547 | -0.1344314 | 920.50607447 | 8   | Q        | 2    | 442.13335499 |
| +0.0284279          | 524.78596423 |            | 1048.564652  | 9   | Q        | 1    | 314.07477748 |
|                     |              |            |              | 10  | S        | 0    | 186.01619997 |

Source: 20120508\_VR\_Bsu\_TripleSILACrep1\_pT1L1T2\_F11  
 Scannumber: 8752  
 Protein: BSU22170; ypsC  
 Peptide Score: 64.68  
 Method: ITMS; CID; 3

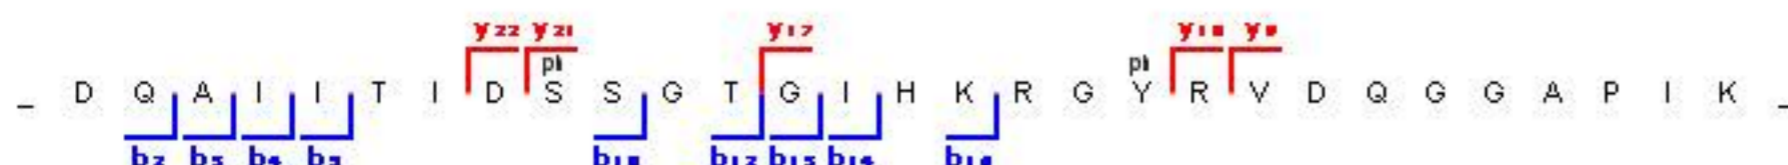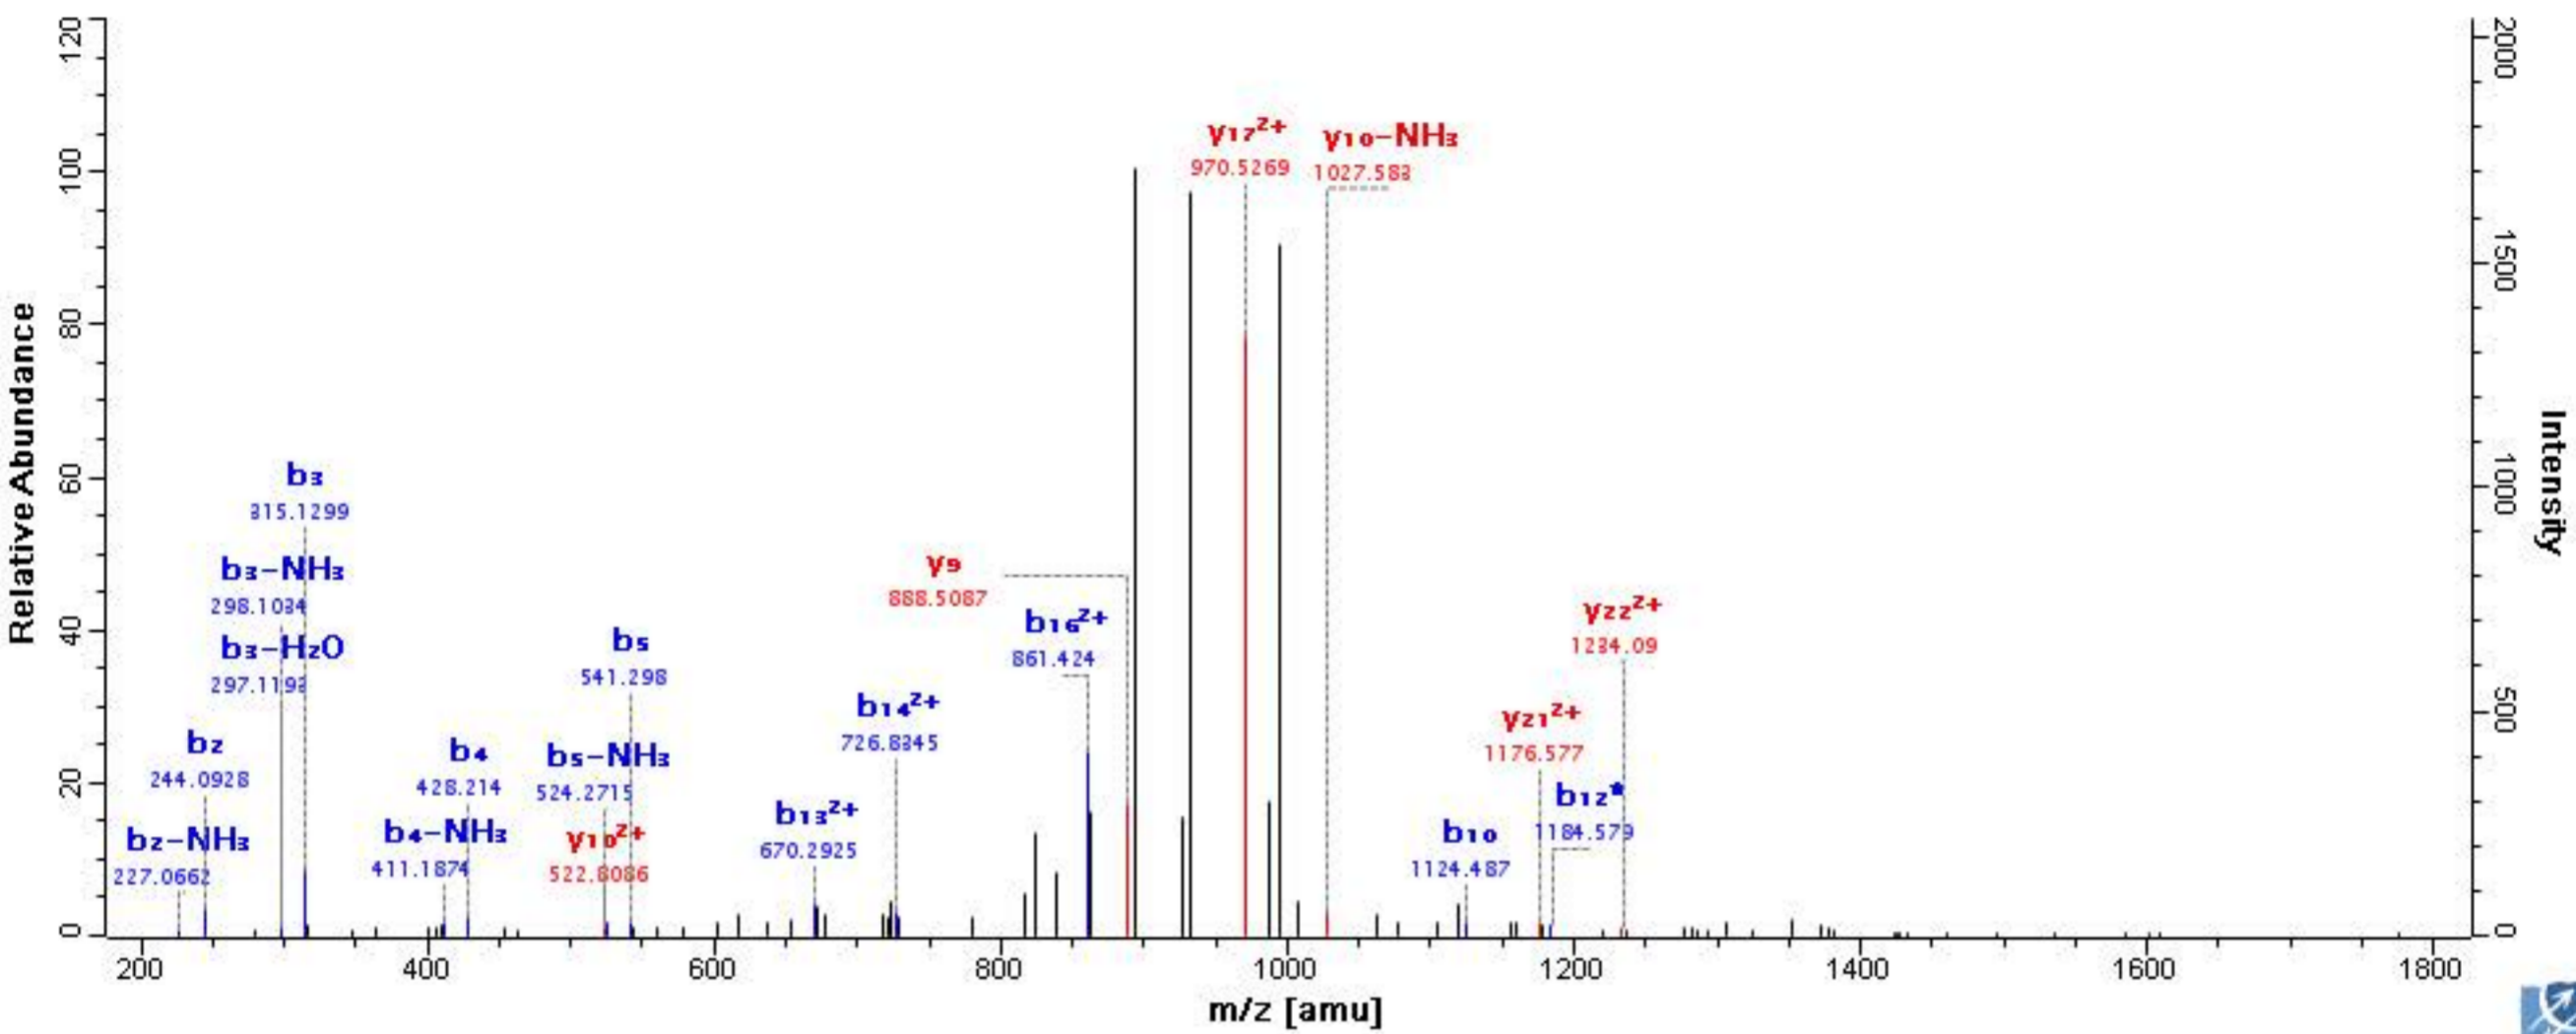

precursor information

|                   |                     |
|-------------------|---------------------|
| Mass:             | 3220.58821          |
| m/z:              | System.Collections. |
| Charge:           | System.Collections. |
| Retentiontime:    | System.Collections. |
| Score:            | 64.67958            |
| Mass Error [ppm]: | -0.019907           |
| PEP:              | 0.0025987           |
| Precursor Type:   | ISO                 |

| b <sup>2+</sup> ion |          | b ion     |          |     |   | y ion    |          | y <sup>2+</sup> ion |          |
|---------------------|----------|-----------|----------|-----|---|----------|----------|---------------------|----------|
| Δ dalton            | mass     | Δ dalton  | mass     | seq |   | Δ dalton | mass     | Δ dalton            | mass     |
|                     | 116.0342 |           | 116.0342 | 1   | D | 28       |          |                     |          |
|                     | 244.0928 | +0.055564 | 244.0928 | 2   | Q | 27       | 3106.569 |                     | 3106.569 |
|                     | 315.1299 | +0.017153 | 315.1299 | 3   | A | 26       | 2978.51  |                     | 2978.51  |
|                     | 428.214  | +0.141494 | 428.214  | 4   | I | 25       | 2907.473 |                     | 2907.473 |
|                     | 541.298  | +0.008968 | 541.298  | 5   | I | 24       | 2794.389 |                     | 2794.389 |
|                     | 642.3457 |           | 642.3457 | 6   | T | 23       | 2681.305 |                     | 2681.305 |
|                     | 755.4298 |           | 755.4298 | 7   | I | 22       | 2580.257 |                     | 2580.257 |
|                     | 870.4567 |           | 870.4567 | 8   | D | 21       | 2467.173 |                     | 1234.09  |
|                     | 1037.455 |           | 1037.455 | 9   | S | 20       | 2352.146 |                     | 1176.577 |
|                     | 1124.487 | -0.190603 | 1124.487 | 10  | S | 19       | 2185.148 |                     | 2185.148 |
|                     | 1181.509 |           | 1181.509 | 11  | G | 18       | 2098.116 |                     | 2098.116 |
|                     | 1282.556 |           | 1282.556 | 12  | T | 17       | 2041.094 |                     | 2041.094 |
| +0.133895           | 670.2925 |           | 1339.578 | 13  | G | 16       | 1940.047 |                     | 970.5269 |
| +0.449162           | 726.8345 |           | 1452.662 | 14  | I | 15       | 1883.025 |                     | 1883.025 |
|                     | 1589.721 |           | 1589.721 | 15  | H | 14       | 1769.941 |                     | 1769.941 |
| -0.286691           | 861.424  |           | 1721.841 | 16  | K | 13       | 1632.882 |                     | 1632.882 |
|                     | 1877.942 |           | 1877.942 | 17  | R | 12       | 1500.762 |                     | 1500.762 |
|                     | 1934.963 |           | 1934.963 | 18  | G | 11       | 1344.661 |                     | 1344.661 |
|                     | 2177.993 |           | 2177.993 | 19  | Y | 10       | 1287.639 |                     | 1287.639 |
|                     | 2334.094 |           | 2334.094 | 20  | R | 9        | 1044.61  |                     | 522.8086 |
|                     | 2433.163 |           | 2433.163 | 21  | V | 8        | 888.5087 | +0.216444           | 888.5087 |
|                     | 2548.189 |           | 2548.189 | 22  | D | 7        | 789.4403 |                     | 789.4403 |
|                     | 2676.248 |           | 2676.248 | 23  | Q | 6        | 674.4134 |                     | 674.4134 |
|                     | 2733.27  |           | 2733.27  | 24  | G | 5        | 546.3548 |                     | 546.3548 |
|                     | 2790.291 |           | 2790.291 | 25  | G | 4        | 489.3333 |                     | 489.3333 |
|                     | 2861.328 |           | 2861.328 | 26  | A | 3        | 432.3119 |                     | 432.3119 |
|                     | 2958.381 |           | 2958.381 | 27  | P | 2        | 361.2747 |                     | 361.2747 |
|                     | 3071.465 |           | 3071.465 | 28  | I | 1        | 264.222  |                     | 264.222  |
|                     |          |           |          | 29  | K | 0        | 151.1379 |                     | 151.1379 |

general information

|                       |             |
|-----------------------|-------------|
| Annotation:           | 13 of 29    |
| AminoAcids Coverag    | 45 %        |
| Intensity Coverage:   | 25 %        |
| Protein Localisation: | 148 ... 176 |

Source: 20120508\_VR\_Bsu\_TripleSILACrep1\_pT1L1 T2\_F19  
 Scannumber: 13573  
 Protein: BSU13590; mtnW; ykrW  
 Peptide Score: 103.88  
 Method: ITMS; CID; 3

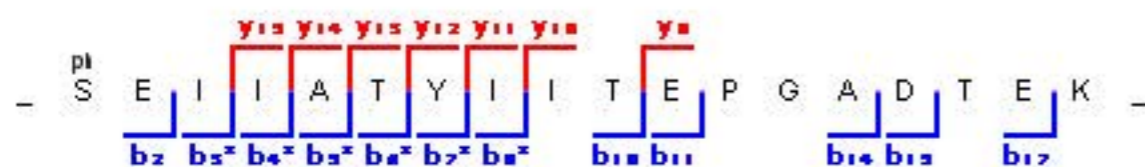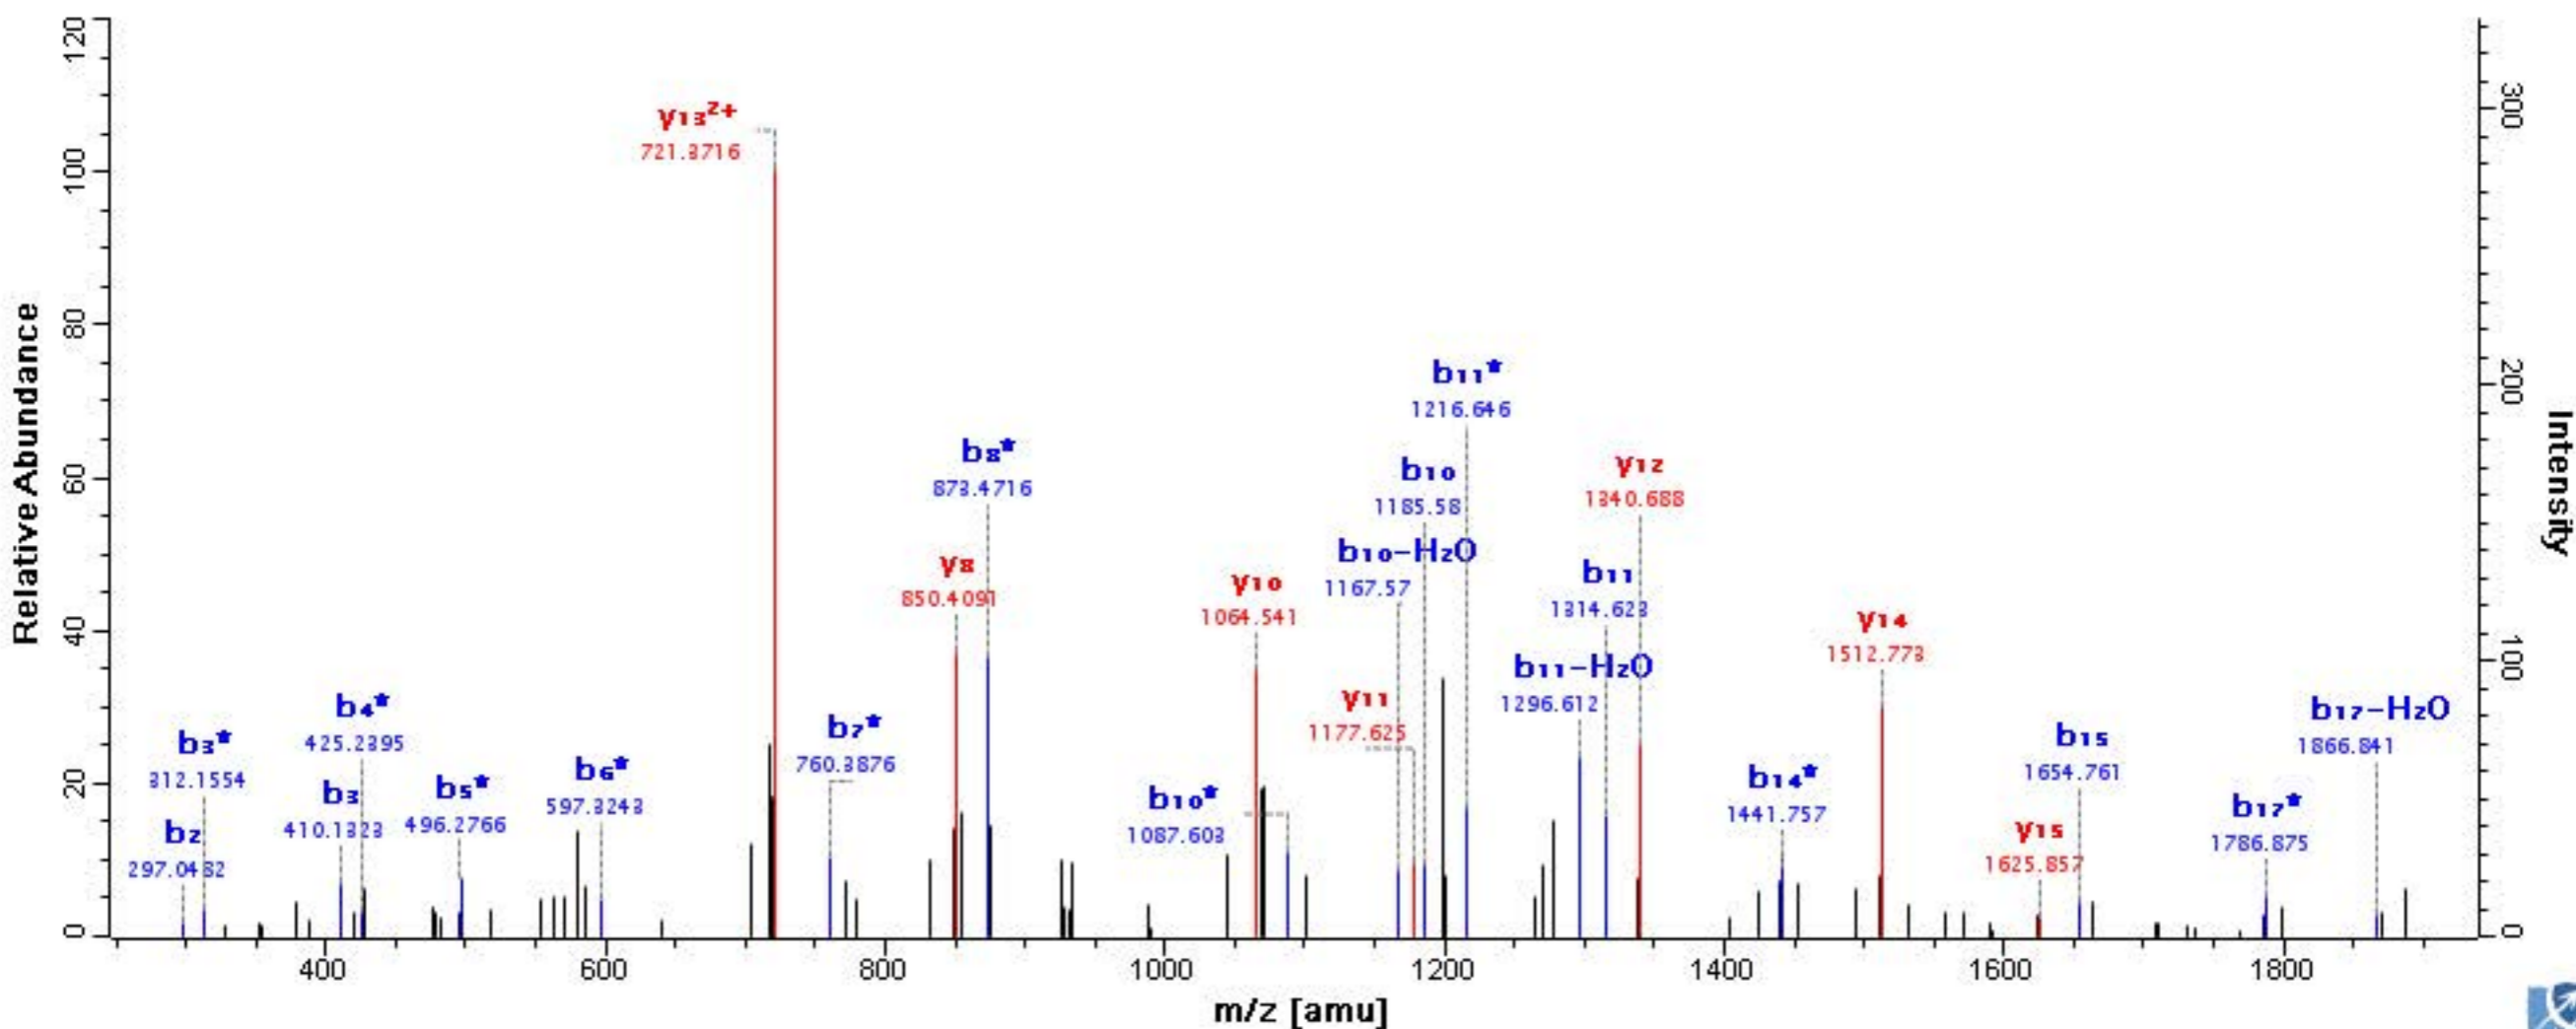

#### precursor information

|                   |                     |
|-------------------|---------------------|
| Mass:             | 2029.9503           |
| m/z:              | System.Collections. |
| Charge:           | System.Collections. |
| Retentiontime:    | System.Collections. |
| Score:            | 103.8806            |
| Mass Error [ppm]: | 0.30181             |
| PEP:              | 3.1909E-05          |
| Precursor Type:   | MULTI               |

#### general information

|                       |          |
|-----------------------|----------|
| Annotation:           | 15 of 18 |
| AminoAcids Coverage:  | 83 %     |
| Intensity Coverage:   | 43 %     |
| Protein Localisation: | 2 ... 19 |

| b ion           |              |    |     |    | y ion           |            | $y^{2+}$ ion    |            |
|-----------------|--------------|----|-----|----|-----------------|------------|-----------------|------------|
| $\Delta$ dalton | mass         |    | seq |    | $\Delta$ dalton | mass       | $\Delta$ dalton | mass       |
|                 | 168.00563528 | 1  | S   | 17 |                 |            |                 |            |
| +0.0208939      | 297.04822838 | 2  | E   | 16 | 1867.9837085    |            | 1867.9837085    |            |
| +0.1334852      | 410.13229236 | 3  | I   | 15 | 1738.9411154    |            | 1738.9411154    |            |
|                 | 523.21635634 | 4  | I   | 14 | 1625.8570514    | -0.0305133 | 1625.8570514    |            |
|                 | 594.25347013 | 5  | A   | 13 | 1512.7729875    | +0.0105819 | 1512.7729875    |            |
|                 | 695.3011486  | 6  | T   | 12 | 1441.7358737    |            | 721.37157507    | +0.1157296 |
|                 | 858.36447714 | 7  | Y   | 11 | 1340.6881952    | -0.0015497 | 1340.6881952    |            |
|                 | 971.44854112 | 8  | I   | 10 | 1177.6248667    | +0.0874136 | 1177.6248667    |            |
|                 | 1084.5326051 | 9  | I   | 9  | 1064.5408027    | +0.1731866 | 1064.5408027    |            |
| +0.0918356      | 1185.5802836 | 10 | T   | 8  | 951.45673869    |            | 951.45673869    |            |
| -0.0454841      | 1314.6228767 | 11 | E   | 7  | 850.40906022    | +0.1091283 | 850.40906022    |            |
|                 | 1411.6756405 | 12 | P   | 6  | 721.36646712    |            | 721.36646712    |            |
|                 | 1468.6971042 | 13 | G   | 5  | 624.31370327    |            | 624.31370327    |            |
|                 | 1539.734218  | 14 | A   | 4  | 567.29223954    |            | 567.29223954    |            |
| +0.0639122      | 1654.7611611 | 15 | D   | 3  | 496.25512576    |            | 496.25512576    |            |
|                 | 1755.8088395 | 16 | T   | 2  | 381.22818272    |            | 381.22818272    |            |
|                 | 1884.8514326 | 17 | E   | 1  | 280.18050425    |            | 280.18050425    |            |
|                 |              | 18 | K   | 0  | 151.13791115    |            | 151.13791115    |            |

Source: 20120508\_VR\_Bsu\_TripleSILACrep1\_pT1L1T2\_F19  
 Scannumber: 14529  
 Protein: BSU30690; ytiB  
 Peptide Score: 138.75  
 Method: ITMS; CID; 3

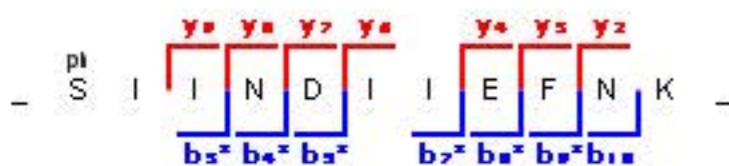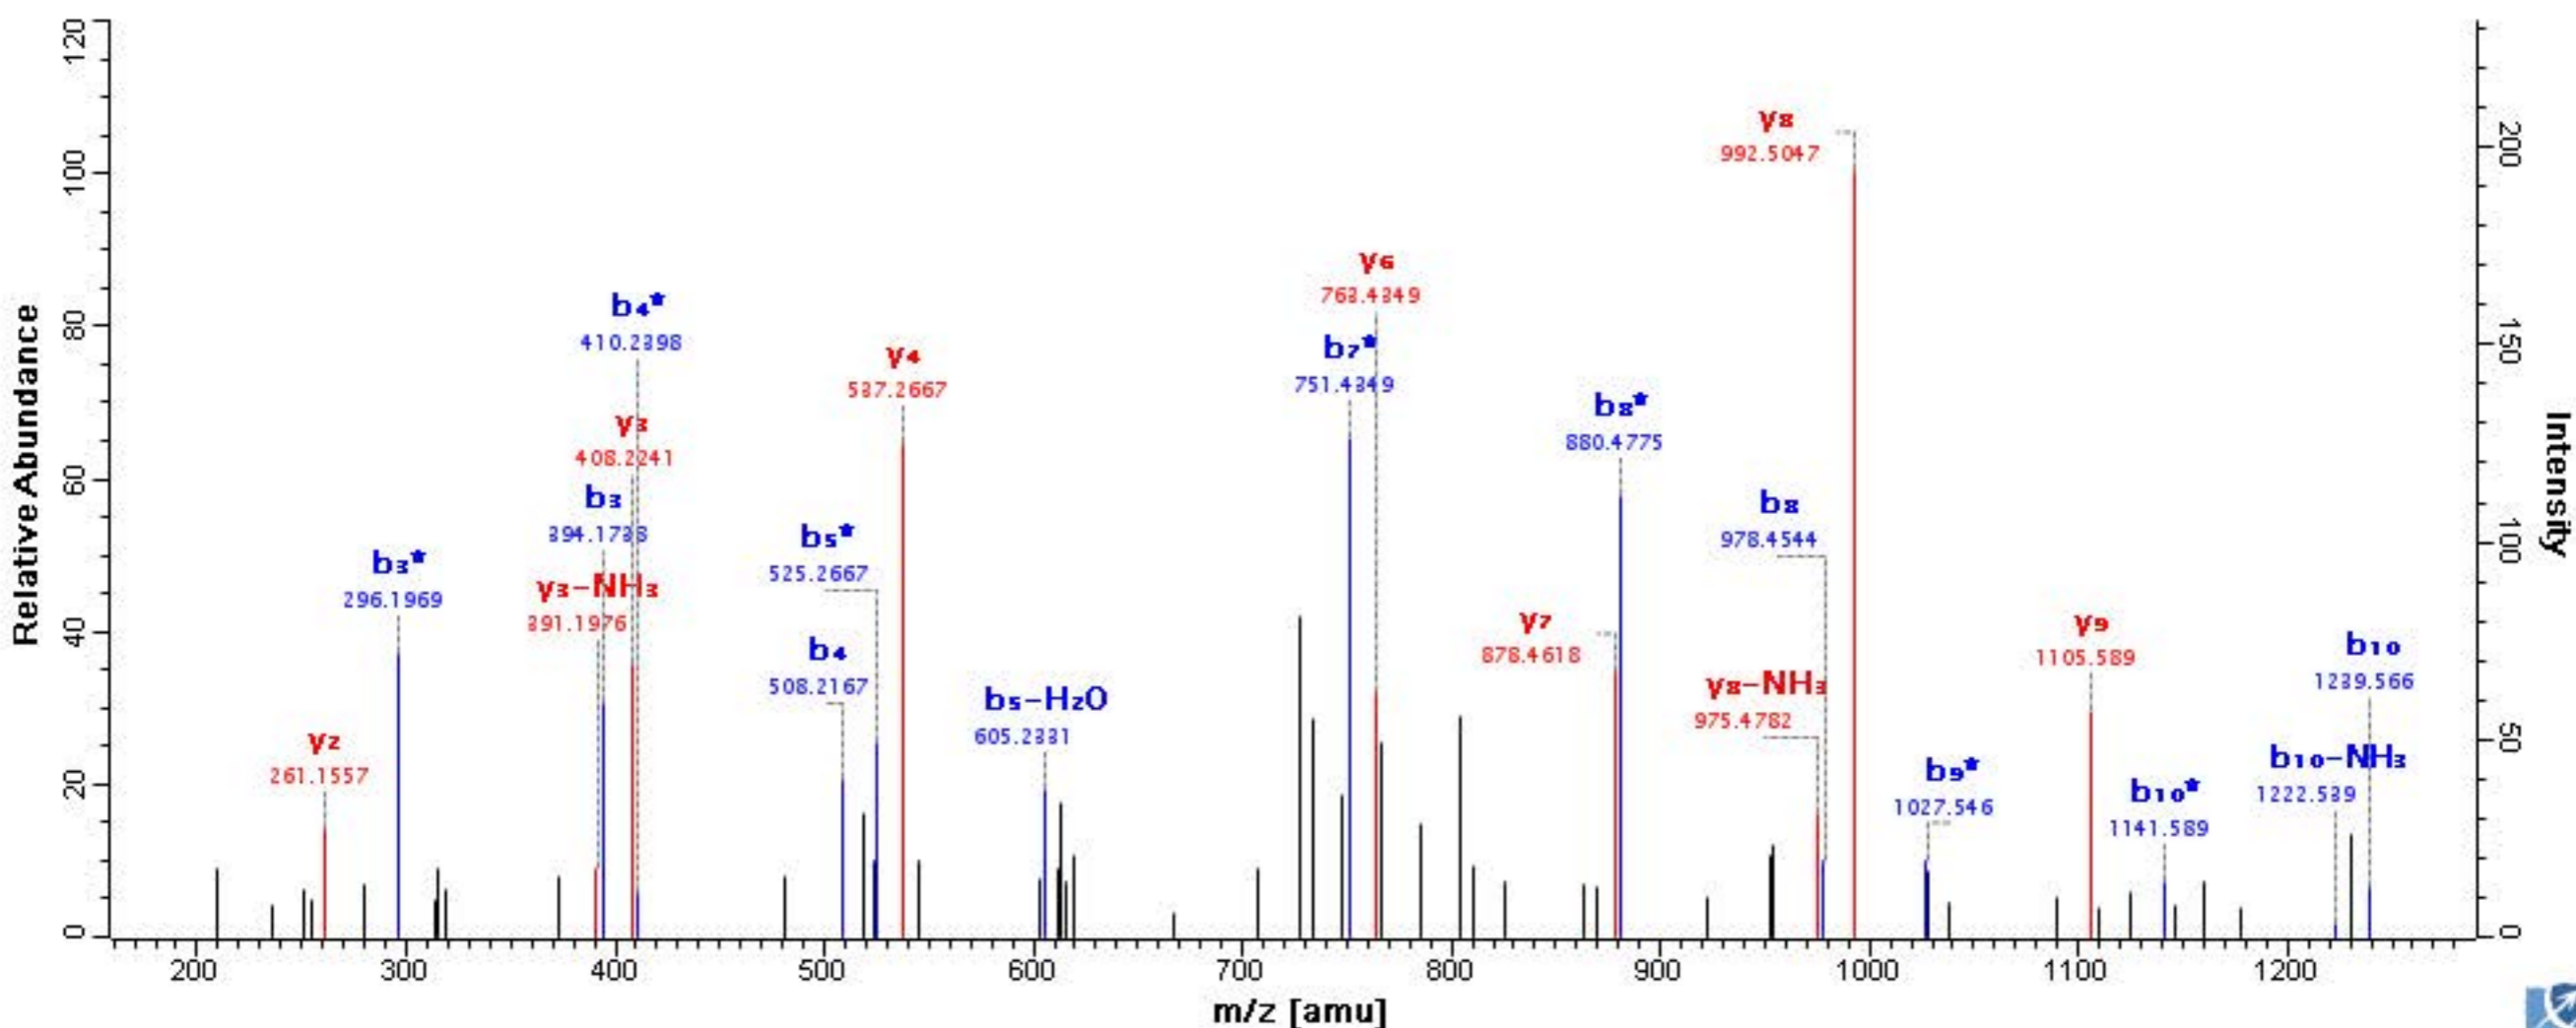

#### precursor information

|                   |                     |
|-------------------|---------------------|
| Mass:             | 1384.66404          |
| m/z:              | System.Collections. |
| Charge:           | System.Collections. |
| Retentiontime:    | System.Collections. |
| Score:            | 138.7549            |
| Mass Error [ppm]: | 0.064794            |
| PEP:              | 4.1906E-11          |
| Precursor Type:   | MULTI               |

#### general information

|                       |          |
|-----------------------|----------|
| Annotation:           | 8 of 11  |
| AminoAcids Coverage:  | 73 %     |
| Intensity Coverage:   | 59 %     |
| Protein Localisation: | 2 ... 12 |

| b ion           |                |    |     |    |                 | y ion      |  |
|-----------------|----------------|----|-----|----|-----------------|------------|--|
| $\Delta$ dalton | mass           |    | seq |    | $\Delta$ dalton | mass       |  |
|                 | 168.005635285  | 1  | S   | 10 |                 |            |  |
|                 | 281.089699265  | 2  | I   | 9  | 1218.672865031  |            |  |
| +0.081852       | 394.173763246  | 3  | I   | 8  | 1105.588801051  | +0.1430105 |  |
| +0.0144494      | 508.216690693  | 4  | N   | 7  | 992.50473707    | +0.080529  |  |
|                 | 623.243633725  | 5  | D   | 6  | 878.461809623   | +0.1654487 |  |
|                 | 736.327697705  | 6  | I   | 5  | 763.434866591   | +0.0485929 |  |
|                 | 849.411761686  | 7  | I   | 4  | 650.350802611   |            |  |
| -0.1472259      | 978.454354782  | 8  | E   | 3  | 537.26673863    | +0.0546725 |  |
|                 | 1125.522768698 | 9  | F   | 2  | 408.224145534   | -0.0040528 |  |
| +0.0348898      | 1239.565696145 | 10 | N   | 1  | 261.155731618   | +0.033752  |  |
|                 |                | 11 | K   | 0  | 147.112804171   |            |  |

Source: 20120508\_VR\_Bsu\_TripleSILACrep1\_pT1L1T2\_F19  
 Scannumber: 6995  
 Protein: BSU37120; fba; fba1; fbaA; tsr  
 Peptide Score: 213.18  
 Method: ITMS; CID; 3

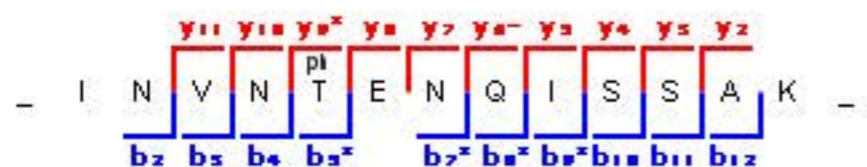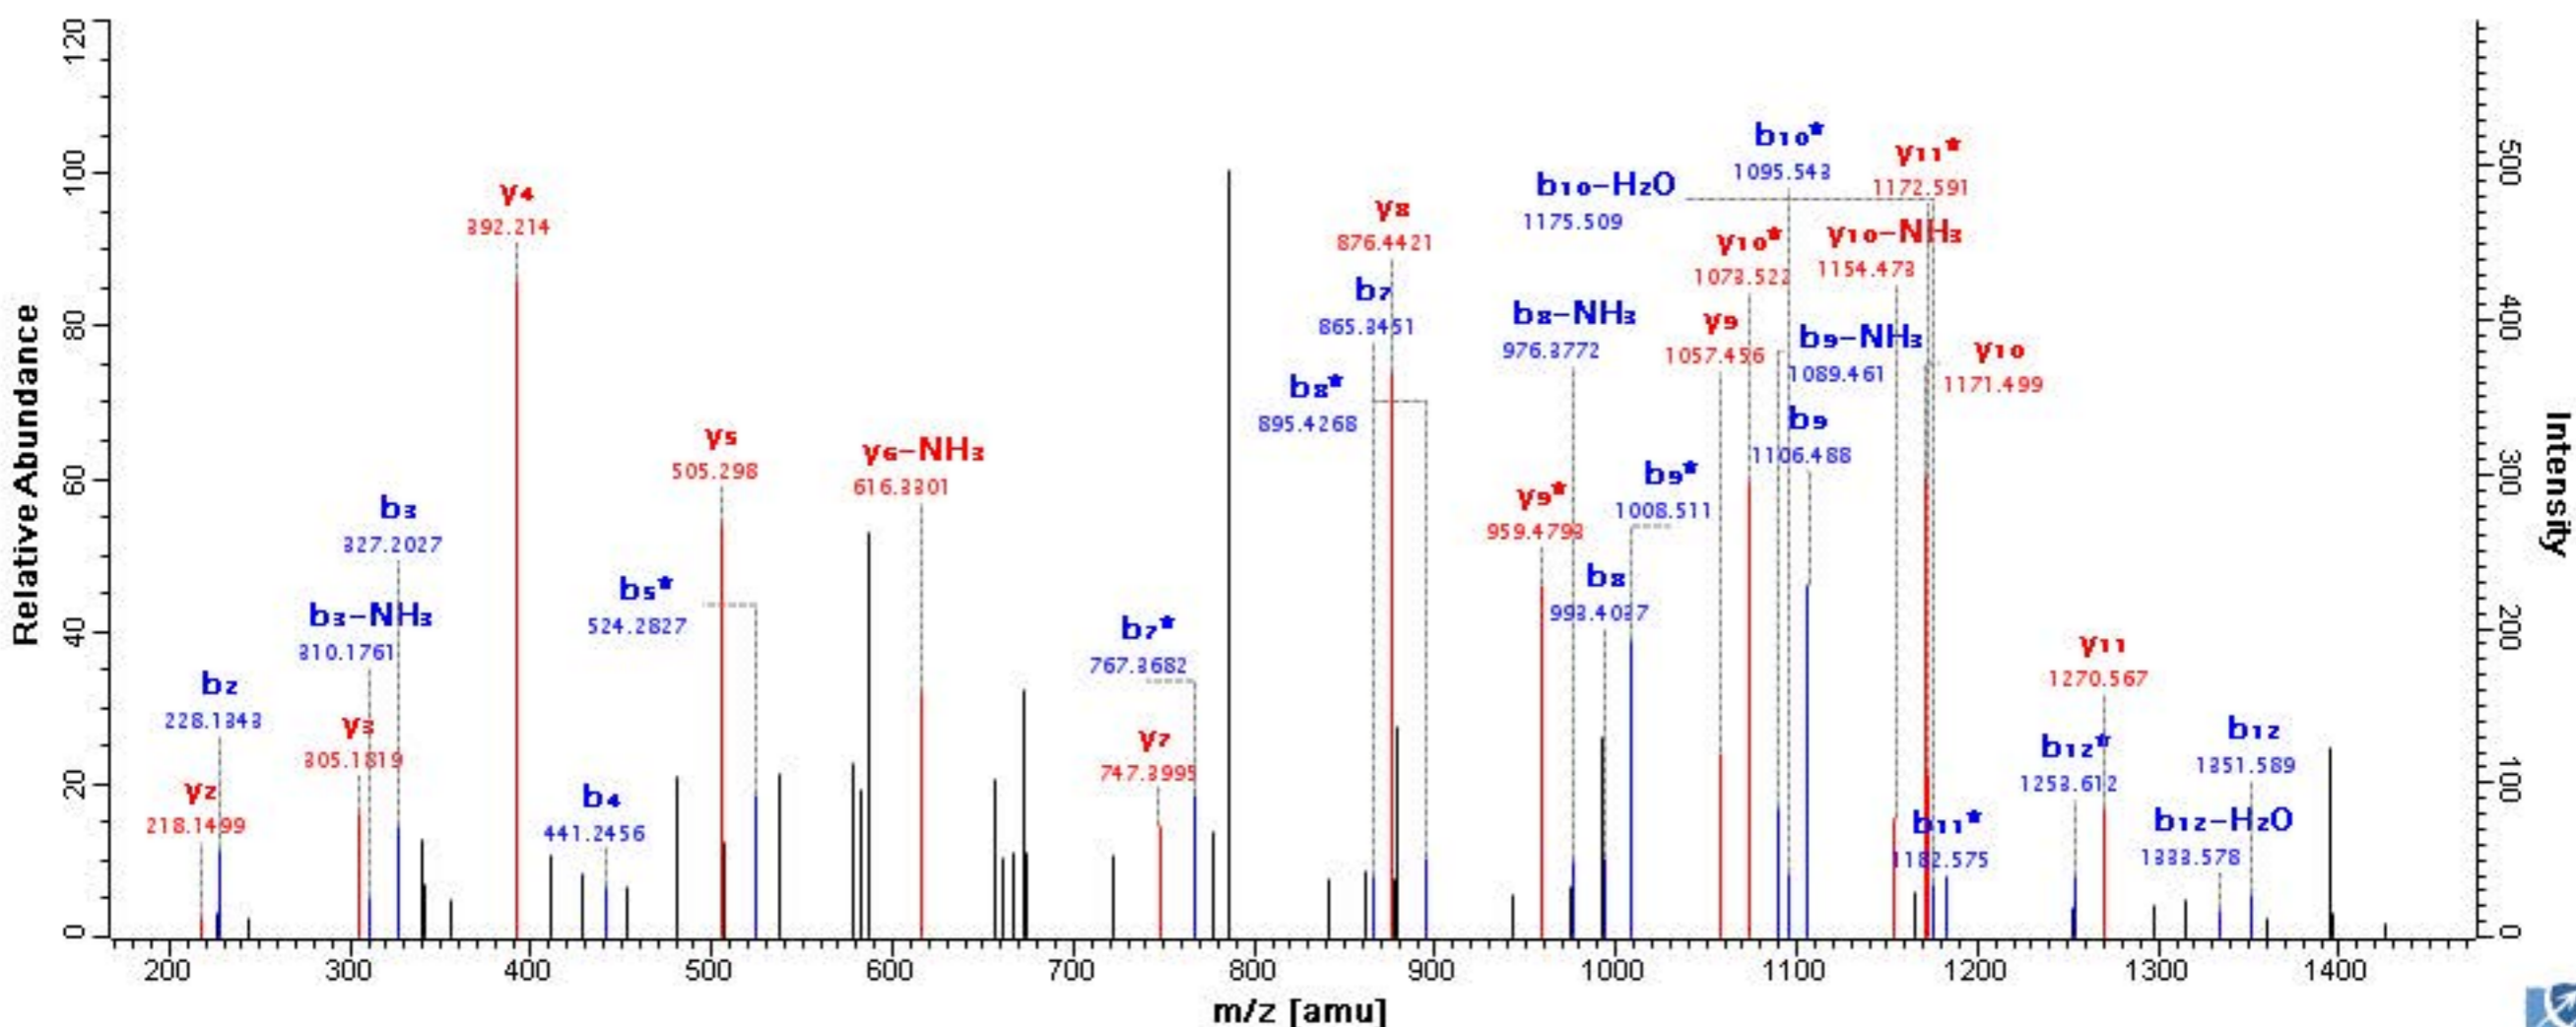

#### precursor information

|                   |                     |
|-------------------|---------------------|
| Mass:             | 1496.6872           |
| m/z:              | System.Collections. |
| Charge:           | System.Collections. |
| Retentiontime:    | System.Collections. |
| Score:            | 213.1823            |
| Mass Error [ppm]: | -0.0039725          |
| PEP:              | 1.4149E-59          |
| Precursor Type:   | MULTI               |

#### general information

|                       |             |
|-----------------------|-------------|
| Annotation:           | 11 of 13    |
| AminoAcids Coverag    | 85 %        |
| Intensity Coverage:   | 55 %        |
| Protein Localisation: | 230 ... 242 |

| b ion      |                |    |     |    |                | gamma ion  |  |
|------------|----------------|----|-----|----|----------------|------------|--|
| Δ dalton   | mass           |    | seq |    | Δ dalton       | mass       |  |
|            | 114.091340447  | 1  | I   | 12 |                |            |  |
| +0.0095309 | 228.134267894  | 2  | N   | 11 | 1384.610414506 |            |  |
| -0.0211022 | 327.20268181   | 3  | V   | 10 | 1270.567487059 | +0.0520198 |  |
| +0.1774864 | 441.245609258  | 4  | N   | 9  | 1171.499073143 | +0.1413077 |  |
|            | 622.25961814   | 5  | T   | 8  | 1057.456145696 | +0.0630193 |  |
|            | 751.302211236  | 6  | E   | 7  | 876.442136813  | +0.0452899 |  |
| -0.033188  | 865.345138684  | 7  | N   | 6  | 747.399543717  | +0.0325242 |  |
| -0.052703  | 993.403716195  | 8  | Q   | 5  | 633.35661627   |            |  |
| -0.0244013 | 1106.487780175 | 9  | I   | 4  | 505.298038759  | +0.0308797 |  |
|            | 1193.519808585 | 10 | S   | 3  | 392.213974778  | +0.1076805 |  |
|            | 1280.551836995 | 11 | S   | 2  | 305.181946368  | +0.049682  |  |
| -0.1842877 | 1351.588950783 | 12 | A   | 1  | 218.149917958  | +0.0090176 |  |
|            |                | 13 | K   | 0  | 147.112804171  |            |  |

Source: 20120508\_VR\_Bsu\_TripleSILACrep1\_pT1L1T2\_F20  
 Scannumber: 13532  
 Protein: BSU29130; citC; icd  
 Peptide Score: 231.06  
 Method: ITMS; CID; 3

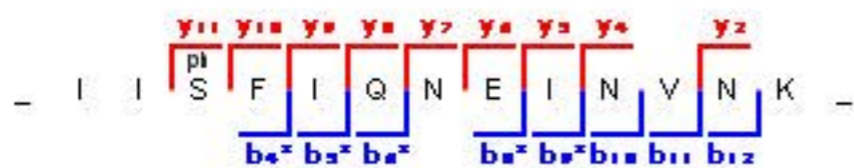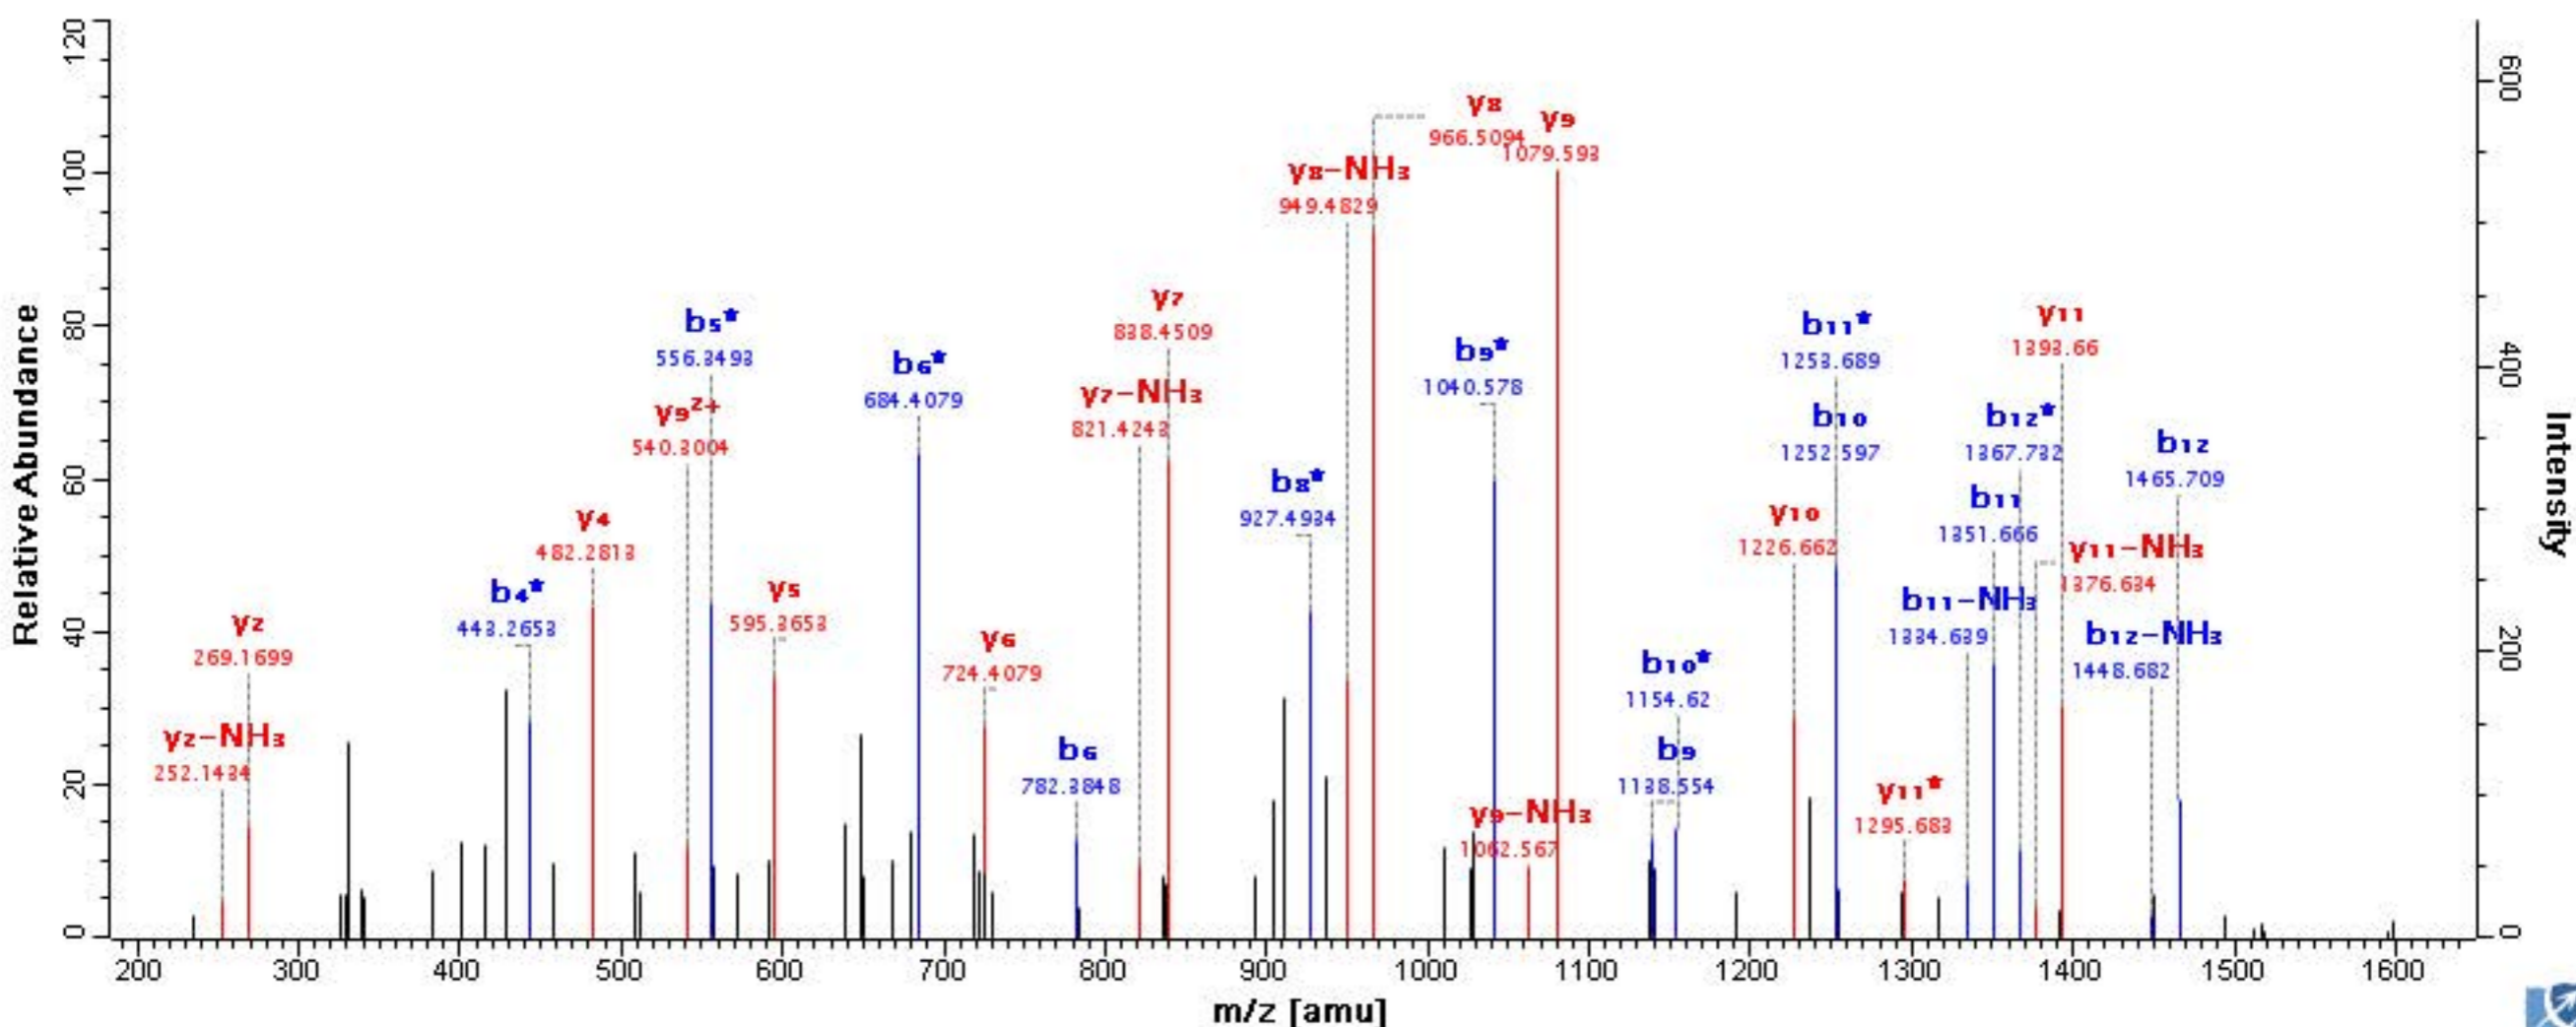

#### precursor information

|                   |                     |
|-------------------|---------------------|
| Mass:             | 1610.8069           |
| m/z:              | System.Collections. |
| Charge:           | System.Collections. |
| Retentiontime:    | System.Collections. |
| Score:            | 231.0625            |
| Mass Error [ppm]: | -0.012825           |
| PEP:              | 2.069E-89           |
| Precursor Type:   | MULTI               |

#### general information

|                       |             |
|-----------------------|-------------|
| Annotation:           | 10 of 13    |
| AminoAcids Coverag    | 77 %        |
| Intensity Coverage:   | 63 %        |
| Protein Localisation: | 166 ... 178 |

| b ion      |              |    |     |    | gamma ion    |            |              | gamma <sup>2+</sup> ion |  |
|------------|--------------|----|-----|----|--------------|------------|--------------|-------------------------|--|
| Δ dalton   | mass         |    | seq |    | Δ dalton     | mass       | Δ dalton     | mass                    |  |
|            | 114.09134045 | 1  | I   | 12 |              |            |              |                         |  |
|            | 227.17540443 | 2  | I   | 11 | 1506.7443345 |            | 1506.7443345 |                         |  |
|            | 394.17376325 | 3  | S   | 10 | 1393.6602705 | +0.0410234 | 1393.6602705 |                         |  |
|            | 541.24217716 | 4  | F   | 9  | 1226.6619117 | +0.0020287 | 1226.6619117 |                         |  |
|            | 654.32624114 | 5  | I   | 8  | 1079.5934978 | +0.1731038 | 540.30038714 | +0.078397               |  |
| +0.1620563 | 782.38481865 | 6  | Q   | 7  | 966.50943383 | +0.1466331 | 966.50943383 |                         |  |
|            | 896.4277461  | 7  | N   | 6  | 838.45085632 | +0.0674542 | 838.45085632 |                         |  |
|            | 1025.4703392 | 8  | E   | 5  | 724.40792887 | +0.0359798 | 724.40792887 |                         |  |
| +0.2136632 | 1138.5544032 | 9  | I   | 4  | 595.36533577 | +0.0248009 | 595.36533577 |                         |  |
| -0.167399  | 1252.5973306 | 10 | N   | 3  | 482.28127179 | +0.0544826 | 482.28127179 |                         |  |
| -0.019016  | 1351.6657445 | 11 | V   | 2  | 368.23834435 |            | 368.23834435 |                         |  |
| +0.0629345 | 1465.708672  | 12 | N   | 1  | 269.16993043 | +0.0796728 | 269.16993043 |                         |  |
|            |              | 13 | K   | 0  | 155.12700298 |            | 155.12700298 |                         |  |



Source: 20120508\_VR\_Bsu\_TripleSILACrep1\_pT1L1T2\_F20  
 Scannumber: 14211  
 Protein: BSU16600; nusA  
 Peptide Score: 208.27  
 Method: ITMS; CID; 3

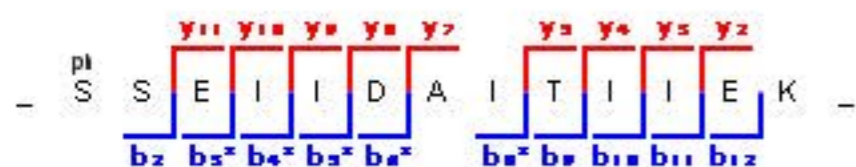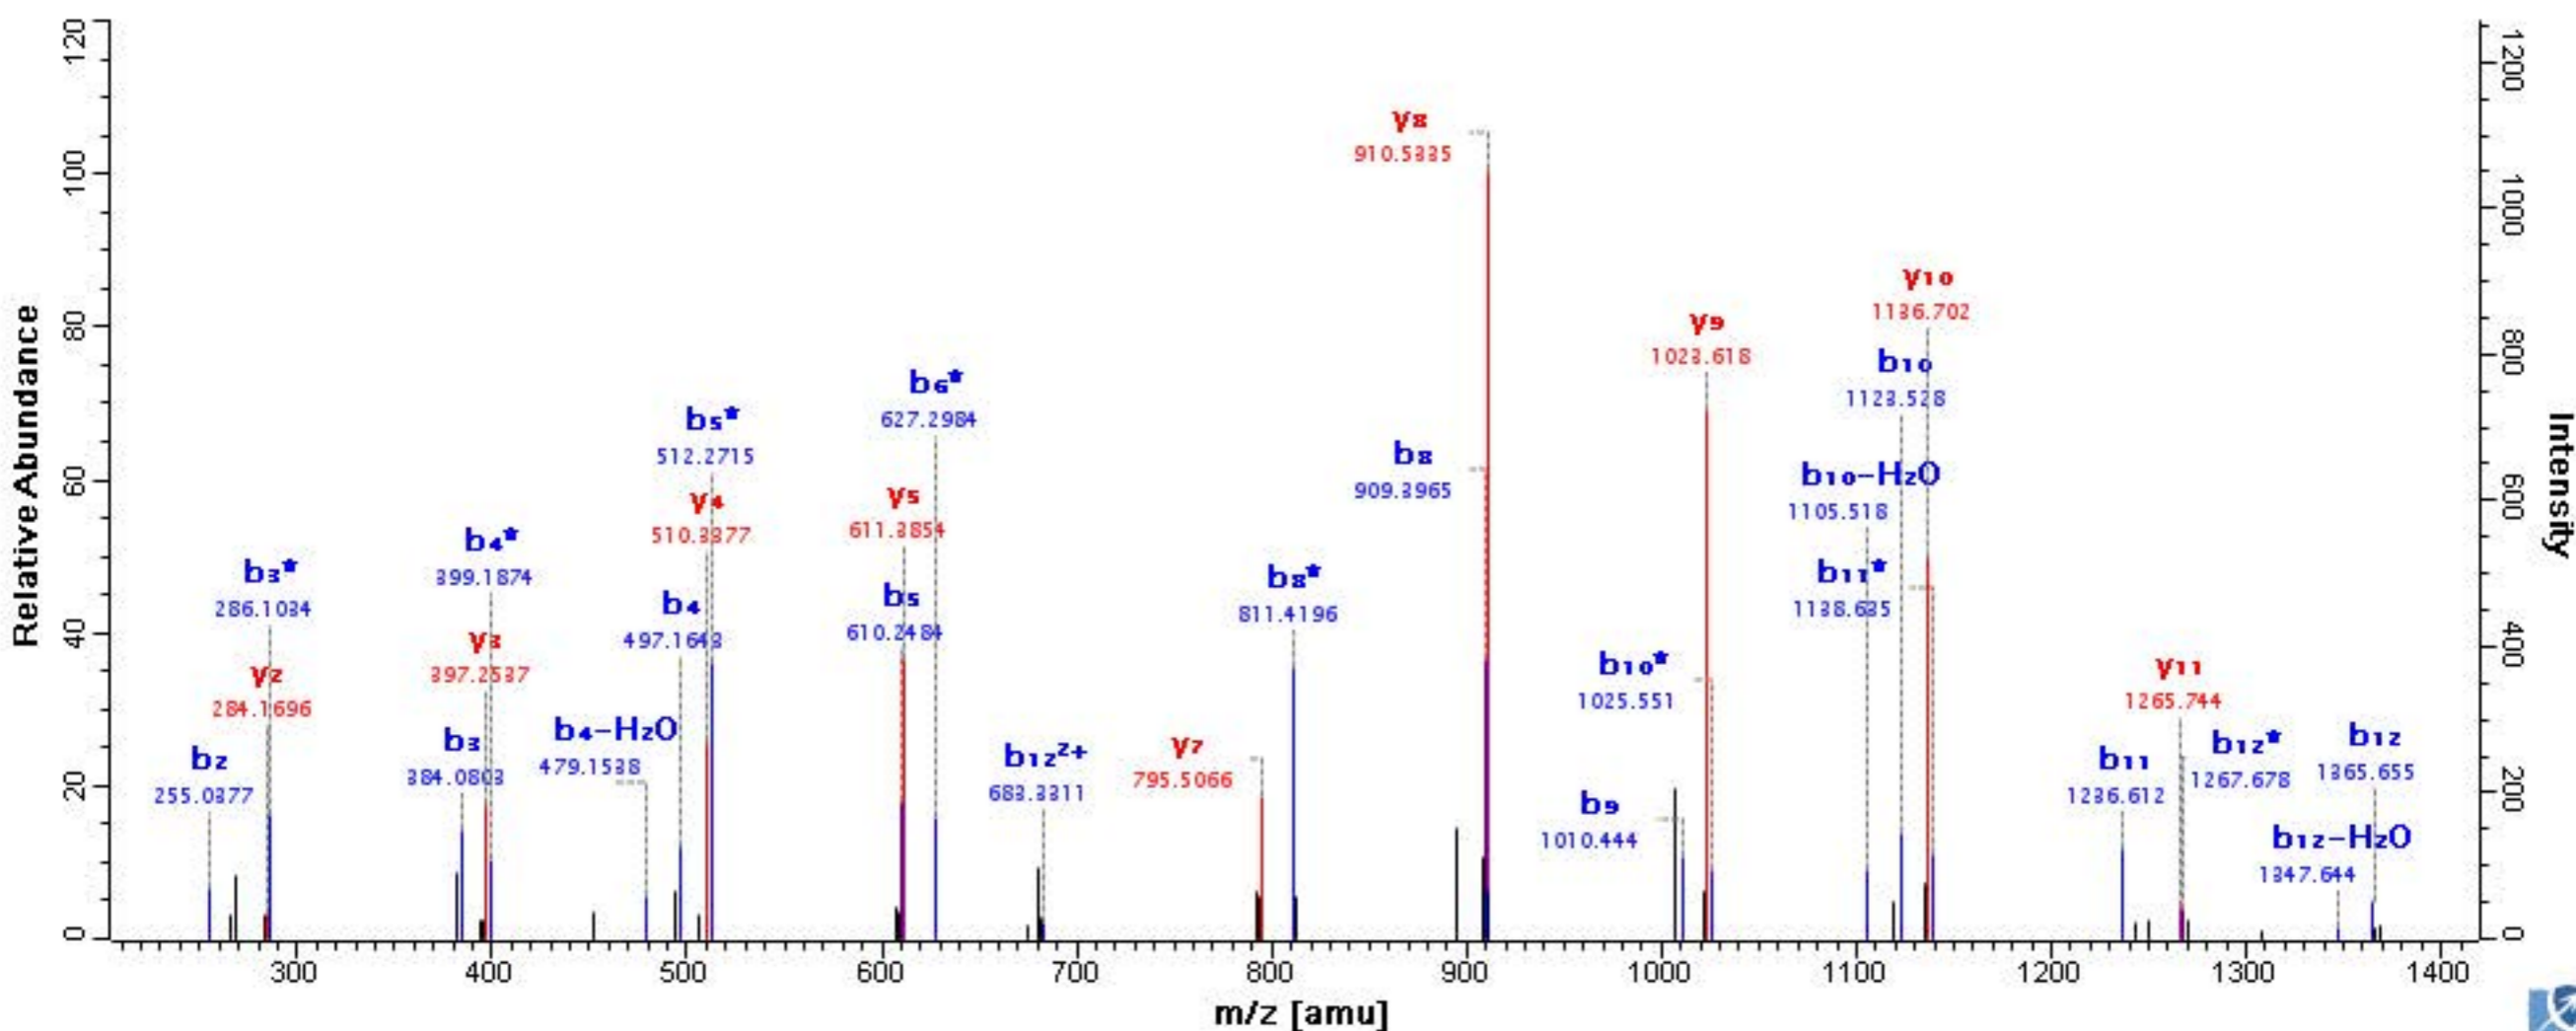

#### precursor information

|                   |                     |
|-------------------|---------------------|
| Mass:             | 1510.75343          |
| m/z:              | System.Collections. |
| Charge:           | System.Collections. |
| Retentiontime:    | System.Collections. |
| Score:            | 208.2719            |
| Mass Error [ppm]: | 0.18145             |
| PEP:              | 3.4616E-59          |
| Precursor Type:   | MULTI               |

#### general information

|                       |          |
|-----------------------|----------|
| Annotation:           | 11 of 13 |
| AminoAcids Coverag    | 85 %     |
| Intensity Coverage:   | 76 %     |
| Protein Localisation: | 2 ... 14 |

| b <sup>2+</sup> ion |              | b ion           |              |     | y ion           |      |                         |
|---------------------|--------------|-----------------|--------------|-----|-----------------|------|-------------------------|
| $\Delta$ dalton     | mass         | $\Delta$ dalton | mass         | seq | $\Delta$ dalton | mass |                         |
|                     | 168.00563528 |                 | 168.00563528 | 1   | S               | 12   |                         |
|                     | 255.03766369 | -0.0031025      | 255.03766369 | 2   | S               | 11   | 1352.7762728            |
|                     | 384.08025679 | -0.0845293      | 384.08025679 | 3   | E               | 10   | 1265.7442444 -0.0258606 |
|                     | 497.16432077 | -0.0783833      | 497.16432077 | 4   | I               | 9    | 1136.7016513 +0.1085294 |
|                     | 610.24838475 | +0.0270669      | 610.24838475 | 5   | I               | 8    | 1023.6175873 +0.1839874 |
|                     | 725.27532778 |                 | 725.27532778 | 6   | D               | 7    | 910.53352332 +0.017319  |
|                     | 796.31244157 |                 | 796.31244157 | 7   | A               | 6    | 795.50658028 +0.066845  |
|                     | 909.39650555 | +0.1789339      | 909.39650555 | 8   | I               | 5    | 724.4694665             |
|                     | 1010.444184  | -0.0737617      | 1010.444184  | 9   | T               | 4    | 611.38540251 +0.0452005 |
|                     | 1123.528248  | +0.0957754      | 1123.528248  | 10  | I               | 3    | 510.33772404 -0.0106977 |
|                     | 1236.612312  | +0.0899585      | 1236.612312  | 11  | I               | 2    | 397.25366006 +0.0435201 |
| +0.0176031          | 683.33109077 | -0.2766092      | 1365.6549051 | 12  | E               | 1    | 284.16959608 -0.017588  |
|                     |              |                 |              | 13  | K               | 0    | 155.12700298            |

Source: 20120508\_VR\_Bsu\_TripleSILACrep1\_pT1L1T2\_F20  
 Scannumber: 3294  
 Protein: BSU30530; ytnA  
 Peptide Score: 138.24  
 Method: ITMS; CID; 3

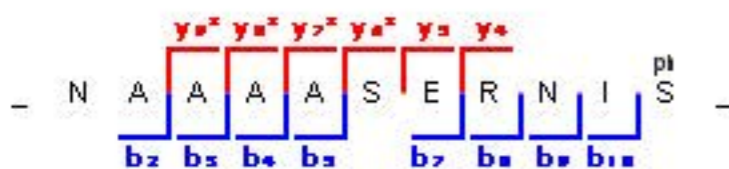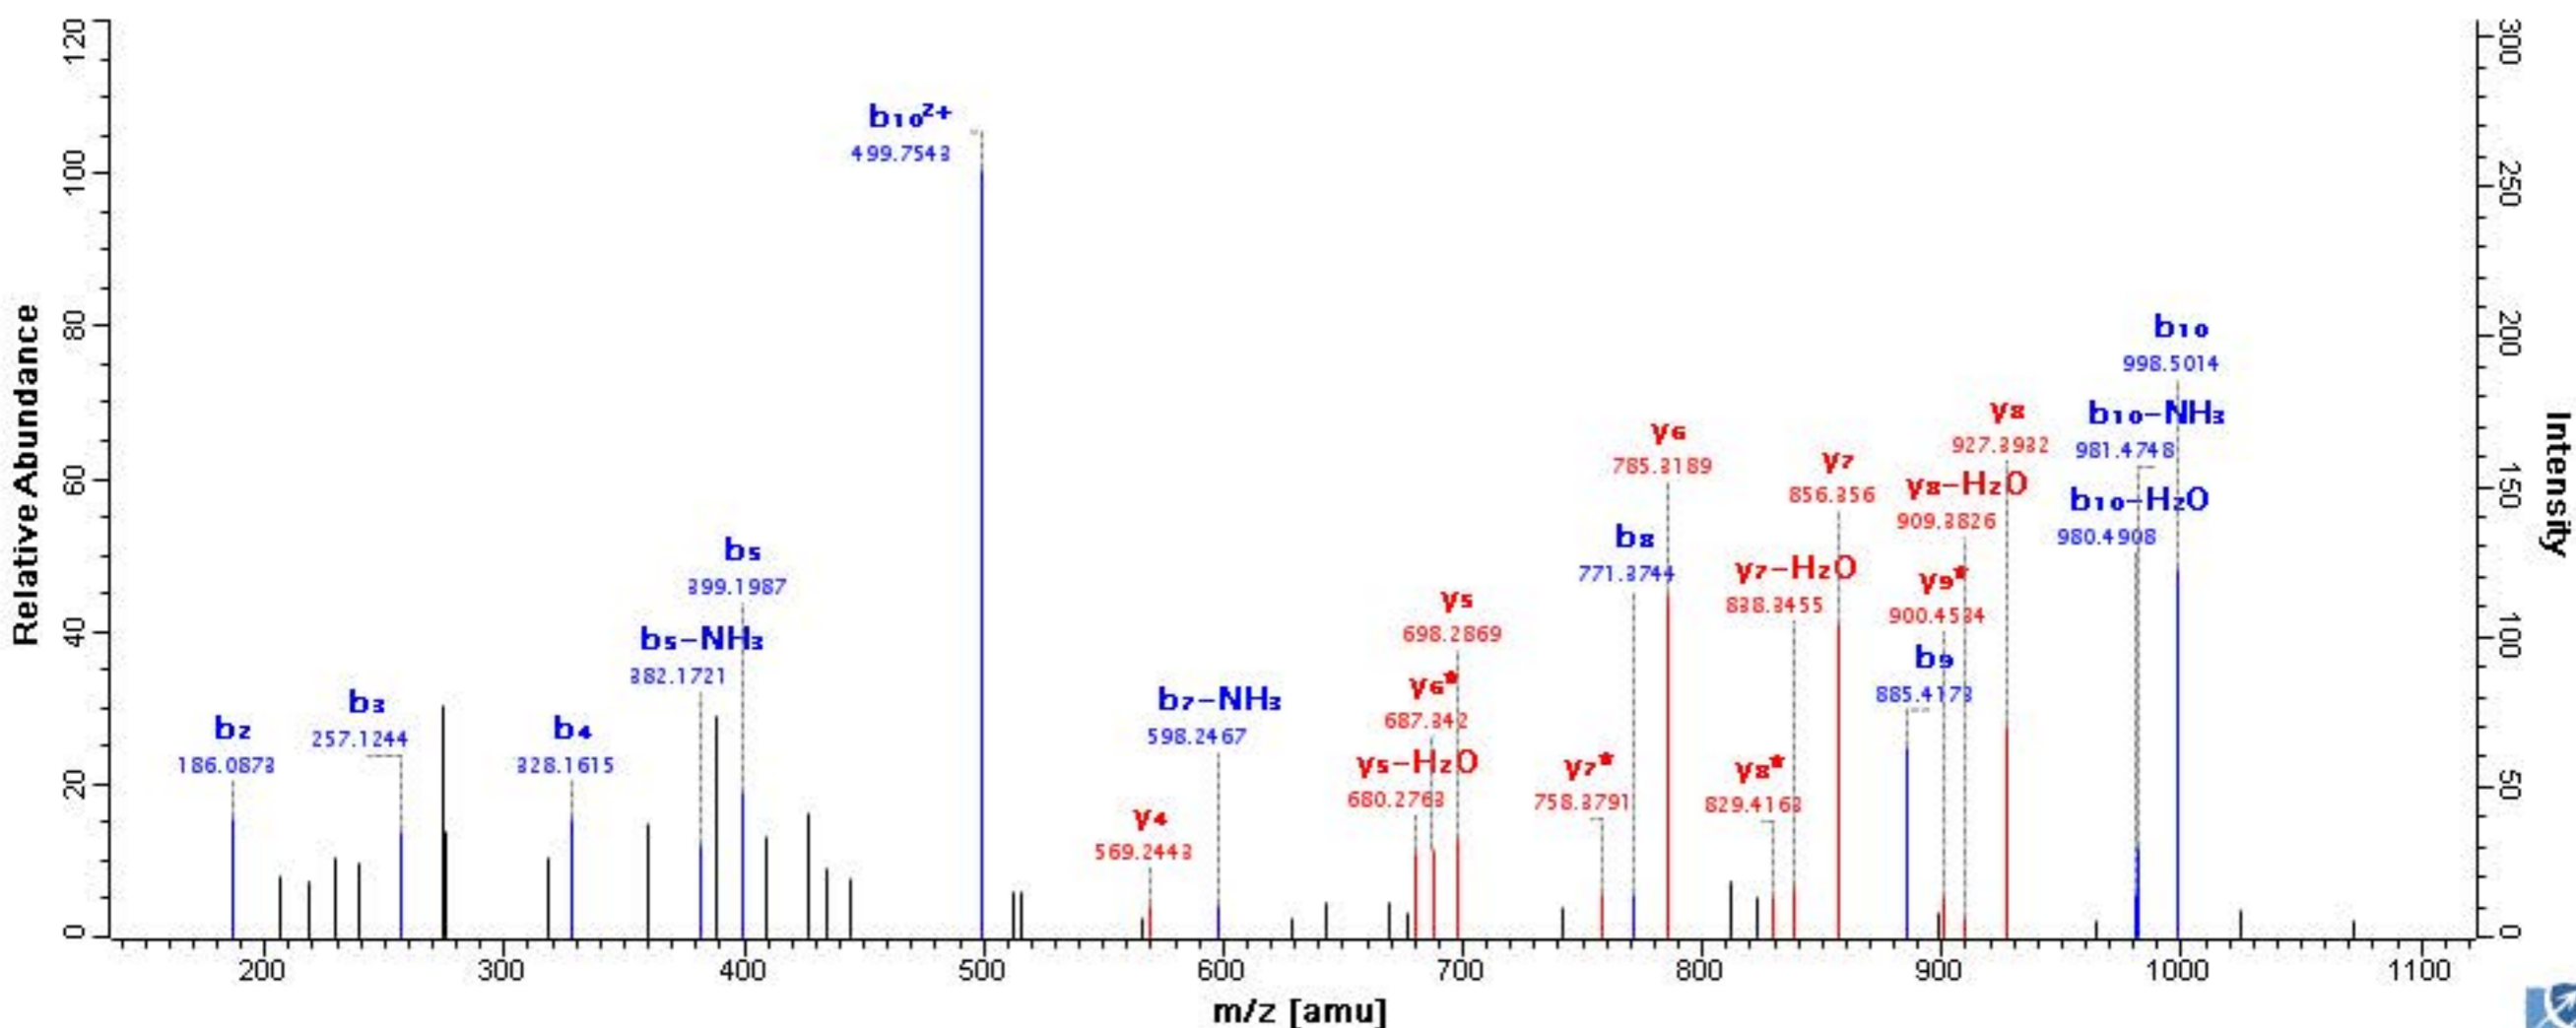

**precursor information**

|                   |                     |
|-------------------|---------------------|
| Mass:             | 1182.50239          |
| m/z:              | System.Collections. |
| Charge:           | System.Collections. |
| Retentiontime:    | System.Collections. |
| Score:            | 138.2356            |
| Mass Error [ppm]: | -0.54322            |
| PEP:              | 1.6007E-05          |
| Precursor Type:   | ISO                 |

**general information**

|                       |             |
|-----------------------|-------------|
| Annotation:           | 10 of 11    |
| AminoAcids Coverag    | 91 %        |
| Intensity Coverage:   | 64 %        |
| Protein Localisation: | 453 ... 463 |

| b <sup>2+</sup> ion |              | b ion      |              |     | y ion |          |              |            |
|---------------------|--------------|------------|--------------|-----|-------|----------|--------------|------------|
| Δ dalton            | mass         | Δ dalton   | mass         | seq |       | Δ dalton | mass         |            |
|                     | 115.05020391 |            | 115.05020391 | 1   | N     | 10       |              |            |
|                     | 186.0873177  | +0.065728  | 186.0873177  | 2   | A     | 9        | 1069.4673791 |            |
|                     | 257.12443149 | +0.1542245 | 257.12443149 | 3   | A     | 8        | 998.4302653  |            |
|                     | 328.16154528 | +0.1848903 | 328.16154528 | 4   | A     | 7        | 927.39315151 | +0.1482914 |
|                     | 399.19865906 | +0.0500592 | 399.19865906 | 5   | A     | 6        | 856.35603772 | +0.0478319 |
|                     | 486.23068747 |            | 486.23068747 | 6   | S     | 5        | 785.31892393 | +0.115036  |
|                     | 615.27328057 |            | 615.27328057 | 7   | E     | 4        | 698.28689552 | +0.0568545 |
|                     | 771.3743916  | +0.0565776 | 771.3743916  | 8   | R     | 3        | 569.24430243 | -0.0651642 |
|                     | 885.41731905 | +0.1542142 | 885.41731905 | 9   | N     | 2        | 413.1431914  |            |
| +0.0419959          | 499.75432975 | -0.0248205 | 998.50138303 | 10  | I     | 1        | 299.10026395 |            |
|                     |              |            |              | 11  | S     | 0        | 186.01619997 |            |

Source: 20120508\_VR\_Bsu\_TripleSILACrep1\_pT1L1T2\_F20  
 Scannumber: 6580  
 Protein: BSU21490; yofF  
 Peptide Score: 182.65  
 Method: ITMS; CID; 3

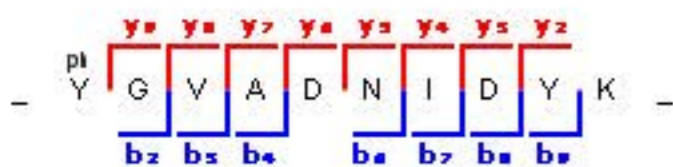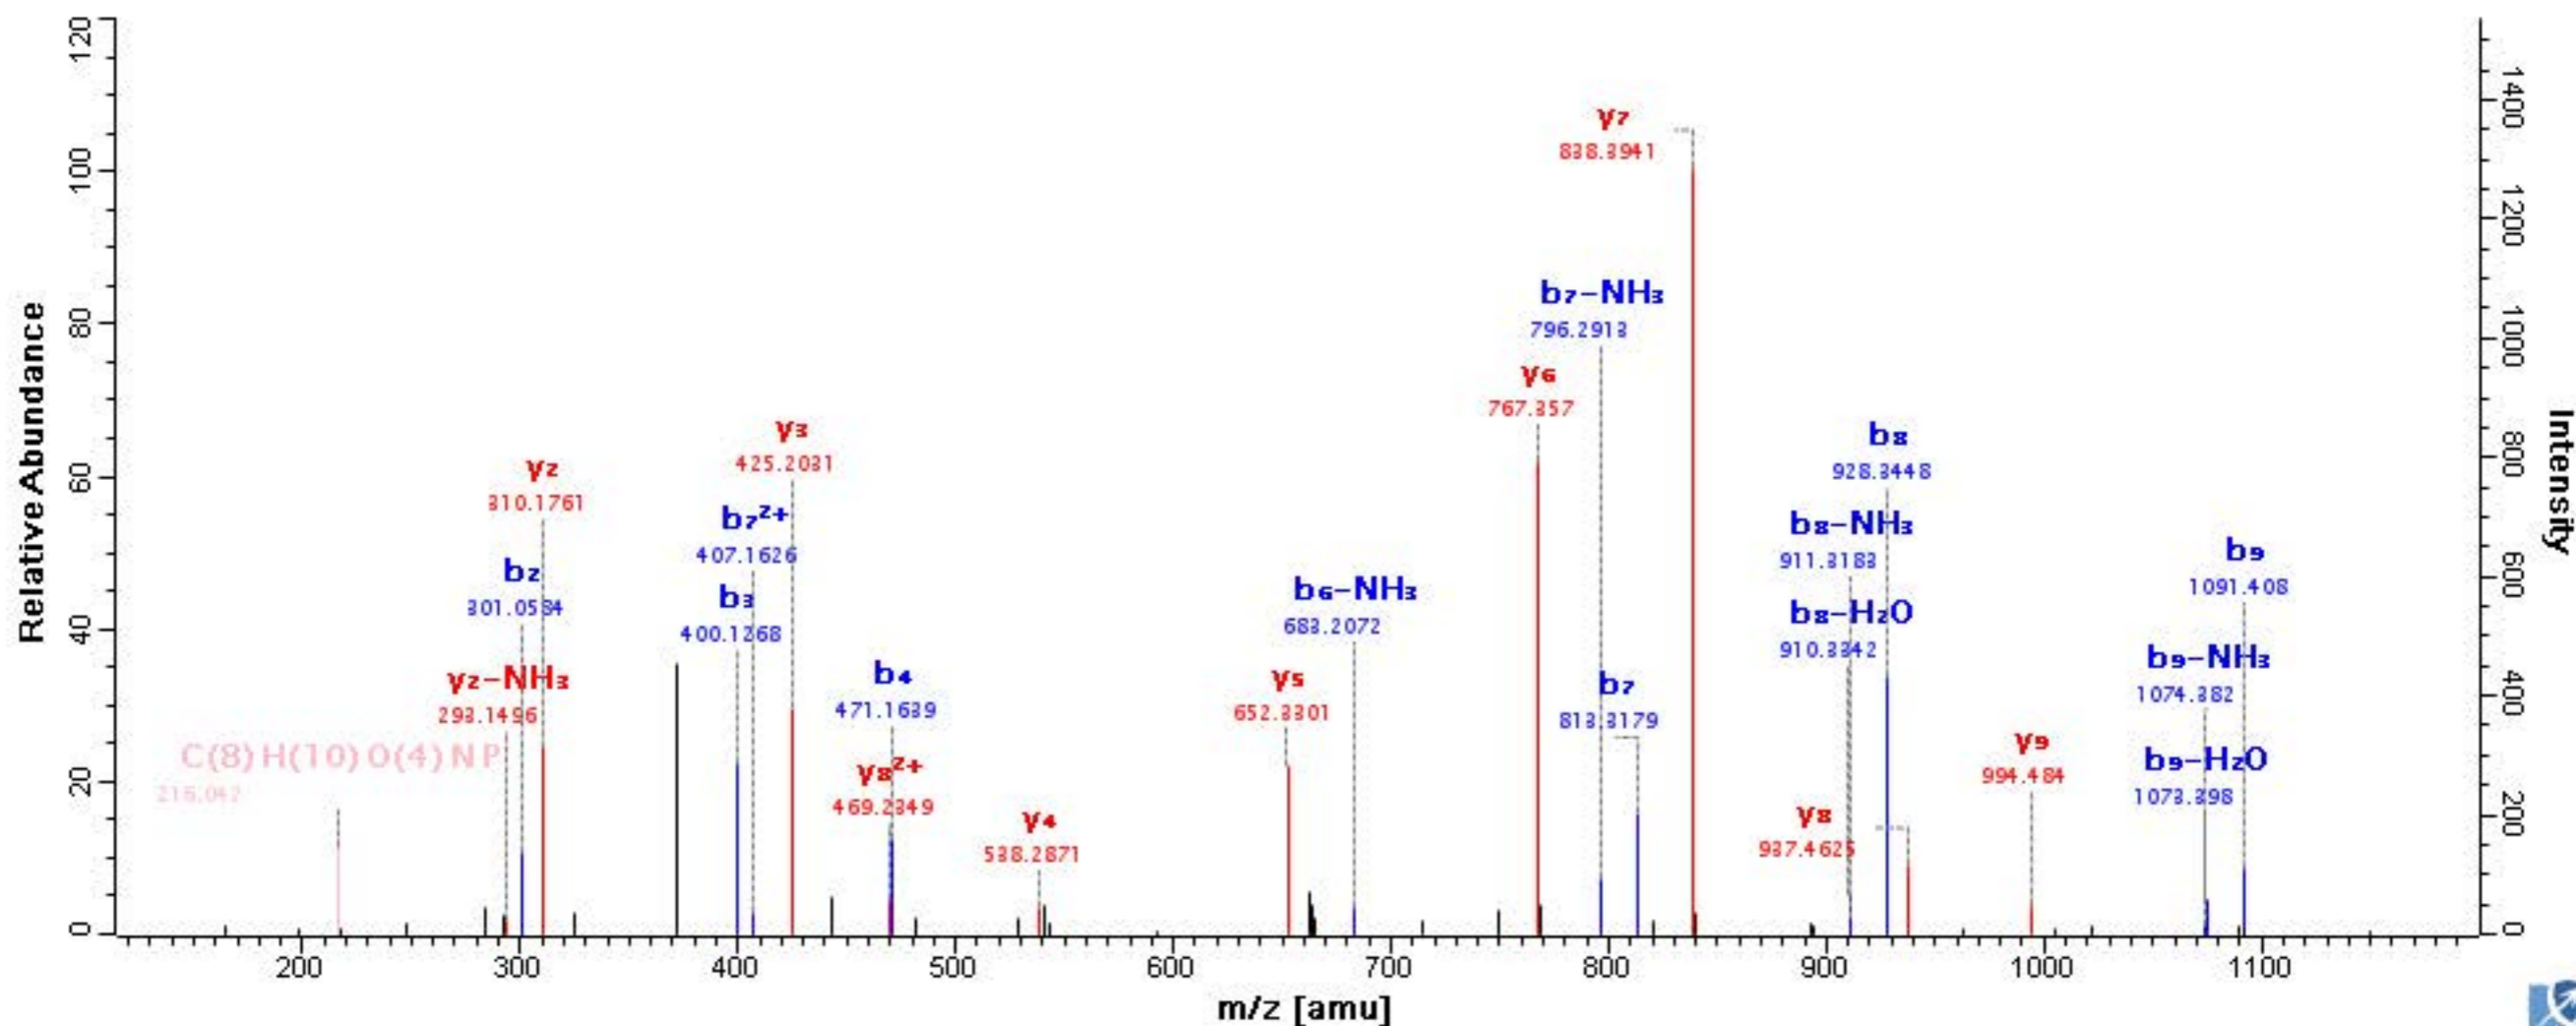

#### precursor information

|                   |                     |
|-------------------|---------------------|
| Mass:             | 1236.50646          |
| m/z:              | System.Collections. |
| Charge:           | System.Collections. |
| Retentiontime:    | System.Collections. |
| Score:            | 182.6465            |
| Mass Error [ppm]: | 0.057821            |
| PEP:              | 2.1542E-25          |
| Precursor Type:   | MULTI               |

#### general information

|                       |           |
|-----------------------|-----------|
| Annotation:           | 8 of 10   |
| AminoAcids Coverage:  | 80 %      |
| Intensity Coverage:   | 81 %      |
| Protein Localisation: | 57 ... 66 |

| b <sup>2+</sup> ion |          | b ion     |          |     | y ion |          | y <sup>2+</sup> ion |           |          |           |
|---------------------|----------|-----------|----------|-----|-------|----------|---------------------|-----------|----------|-----------|
| Δ dalton            | mass     | Δ dalton  | mass     | seq |       | Δ dalton | mass                | Δ dalton  | mass     |           |
|                     | 244.0369 |           | 244.0369 | 1   | Y     | 9        |                     |           |          |           |
|                     | 301.0584 | -0.122242 | 301.0584 | 2   | G     | 8        | 994.484             | +0.056221 | 994.484  |           |
|                     | 400.1268 | +0.039019 | 400.1268 | 3   | V     | 7        | 937.4625            | +0.092089 | 469.2349 | +0.044756 |
|                     | 471.1639 | -0.029894 | 471.1639 | 4   | A     | 6        | 838.3941            | +0.038249 | 838.3941 |           |
|                     | 586.1909 |           | 586.1909 | 5   | D     | 5        | 767.357             | +0.05516  | 767.357  |           |
|                     | 700.2338 |           | 700.2338 | 6   | N     | 4        | 652.3301            | +0.12434  | 652.3301 |           |
| +0.250456           | 407.1626 | +0.223093 | 813.3179 | 7   | I     | 3        | 538.2871            | +0.083405 | 538.2871 |           |
|                     | 928.3448 | +0.046614 | 928.3448 | 8   | D     | 2        | 425.2031            | -0.07301  | 425.2031 |           |
|                     | 1091.408 | +0.037668 | 1091.408 | 9   | Y     | 1        | 310.1761            | +0.164871 | 310.1761 |           |
|                     |          |           |          | 10  | K     | 0        | 147.1128            |           | 147.1128 |           |

Source: 20120508\_VR\_Bsu\_TripleSILACrep1\_pT1L1T2\_F21  
 Scannumber: 5333  
 Protein: BSU13960; ykwC  
 Peptide Score: 101.15  
 Method: ITMS; CID; 3

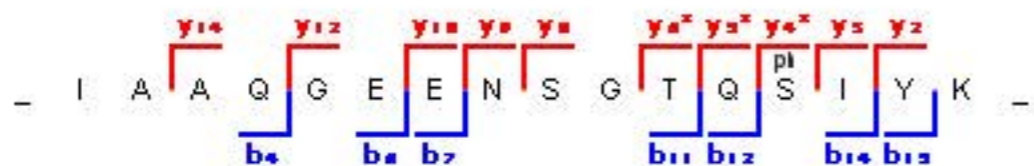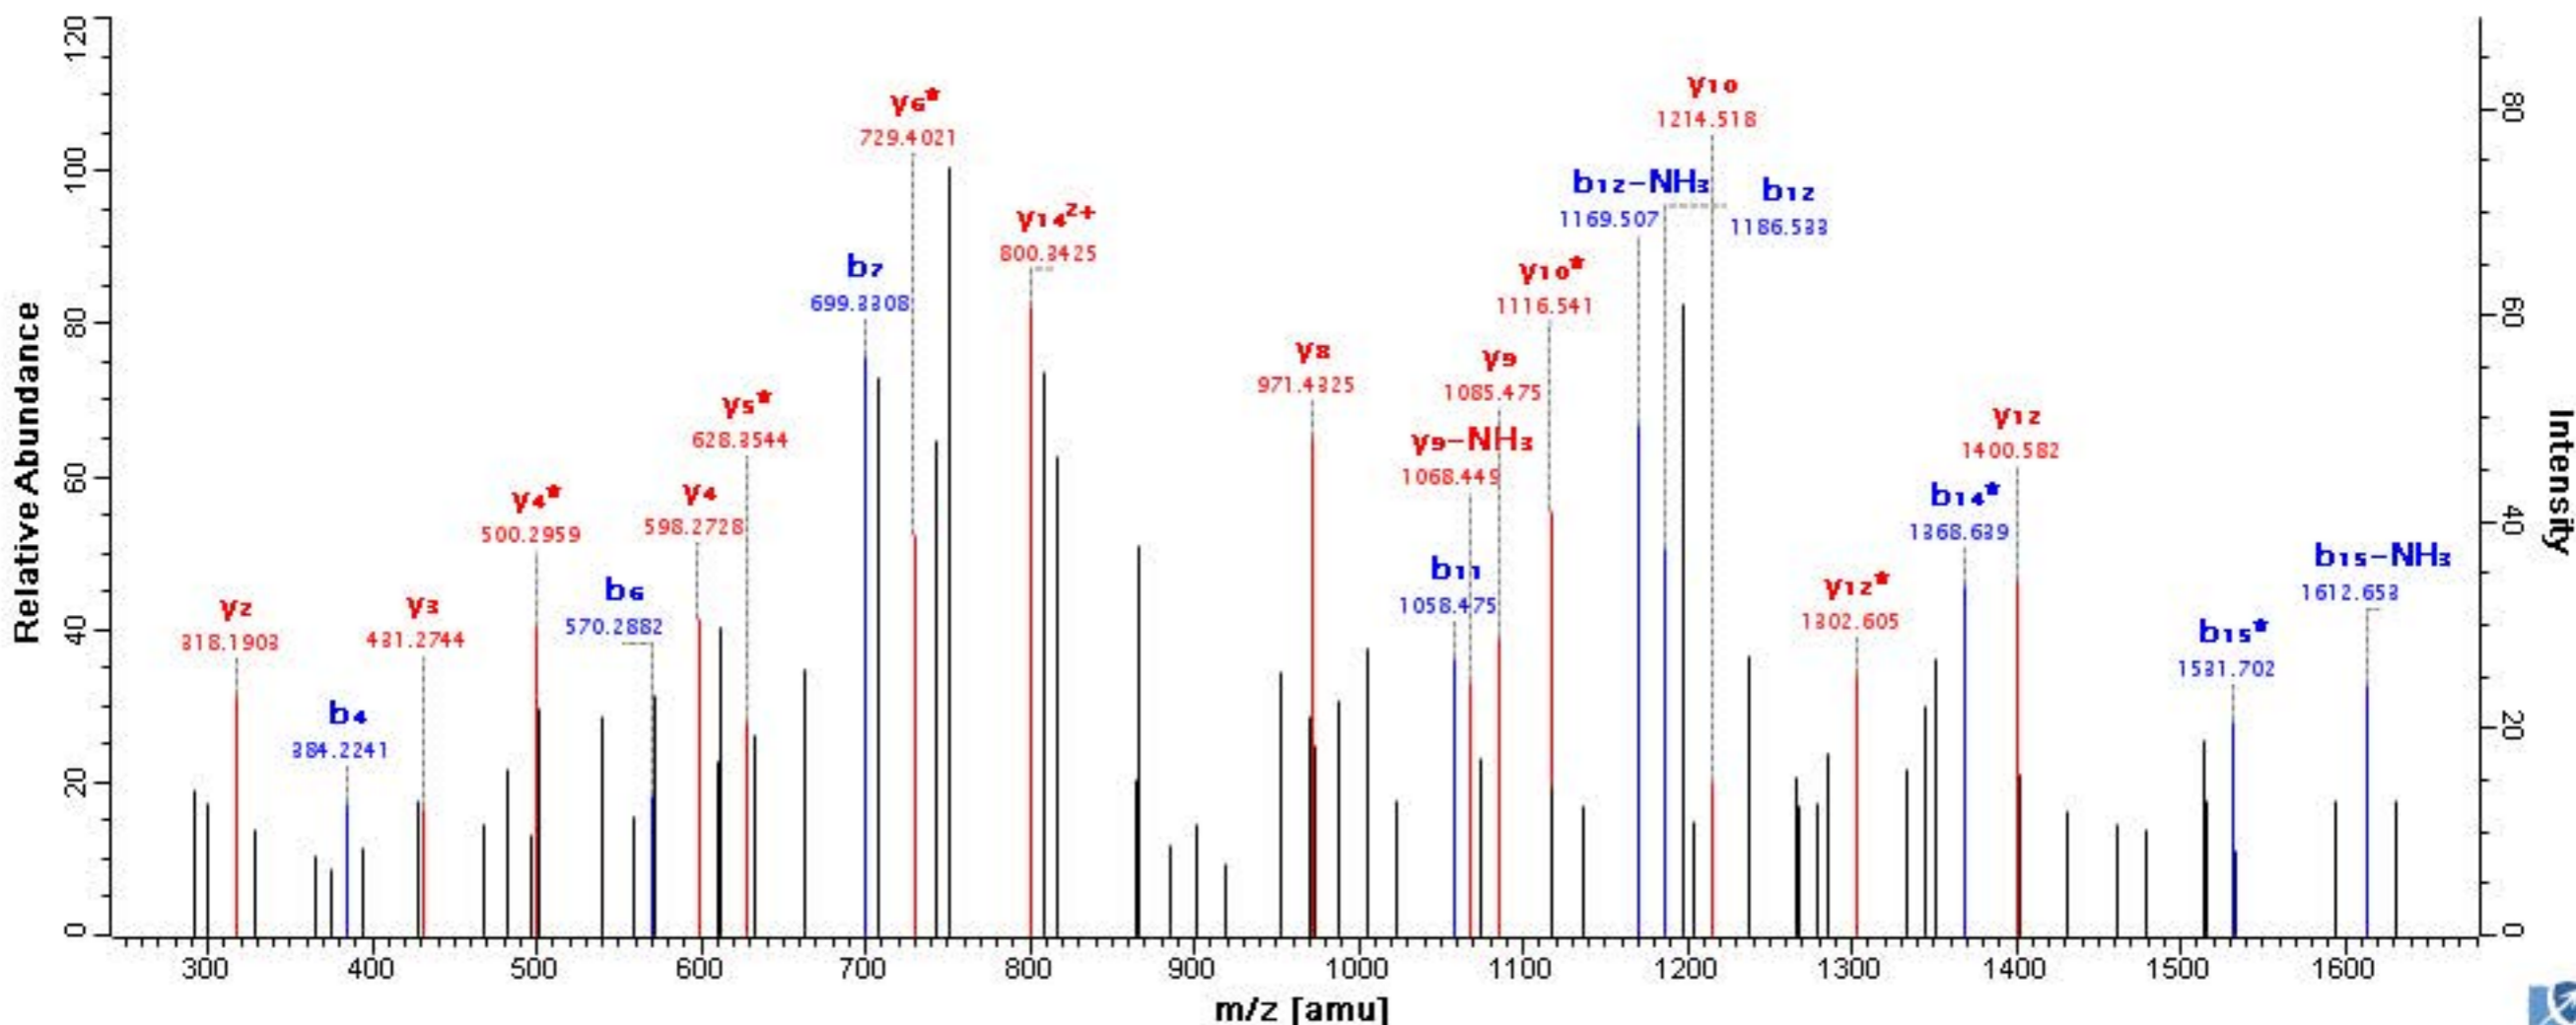

#### precursor information

|                   |                     |
|-------------------|---------------------|
| Mass:             | 1774.77956          |
| m/z:              | System.Collections. |
| Charge:           | System.Collections. |
| Retentiontime:    | System.Collections. |
| Score:            | 101.1486            |
| Mass Error [ppm]: | 1.168               |
| PEP:              | 0.0013724           |
| Precursor Type:   | MULTI               |

#### general information

|                       |             |
|-----------------------|-------------|
| Annotation:           | 12 of 16    |
| AminoAcids Coverag    | 75 %        |
| Intensity Coverage:   | 37 %        |
| Protein Localisation: | 269 ... 284 |

| b ion      |              |    |     |    | y ion        |            | y <sup>2+</sup> ion |            |
|------------|--------------|----|-----|----|--------------|------------|---------------------|------------|
| Δ dalton   | mass         |    | seq |    | Δ dalton     | mass       | Δ dalton            | mass       |
|            | 114.09134045 | 1  | I   | 15 |              |            |                     |            |
|            | 185.12845423 | 2  | A   | 14 | 1670.7148849 |            | 1670.7148849        |            |
|            | 256.16556802 | 3  | A   | 13 | 1599.6777711 |            | 800.34252378        | +0.1595514 |
| +0.2063354 | 384.22414553 | 4  | Q   | 12 | 1528.6406573 |            | 1528.6406573        |            |
|            | 441.24560926 | 5  | G   | 11 | 1400.5820798 | +0.1494876 | 1400.5820798        |            |
| +0.087347  | 570.28820235 | 6  | E   | 10 | 1343.5606161 |            | 1343.5606161        |            |
| +0.1200102 | 699.33079545 | 7  | E   | 9  | 1214.518023  | -0.3317437 | 1214.518023         |            |
|            | 813.3737229  | 8  | N   | 8  | 1085.4754299 | +0.0970799 | 1085.4754299        |            |
|            | 900.40575131 | 9  | S   | 7  | 971.43250244 | +0.0012744 | 971.43250244        |            |
|            | 957.42721503 | 10 | G   | 6  | 884.40047403 |            | 884.40047403        |            |
| -0.032999  | 1058.4748935 | 11 | T   | 5  | 827.37901031 |            | 827.37901031        |            |
| +0.2206794 | 1186.533471  | 12 | Q   | 4  | 726.33133183 |            | 726.33133183        |            |
|            | 1353.5318298 | 13 | S   | 3  | 598.27275432 | +0.1657222 | 598.27275432        |            |
|            | 1466.6158938 | 14 | I   | 2  | 431.2743955  | -0.1839414 | 431.2743955         |            |
|            | 1629.6792224 | 15 | Y   | 1  | 318.19033152 | +0.106513  | 318.19033152        |            |
|            |              | 16 | K   | 0  | 155.12700298 |            | 155.12700298        |            |

Source: 20120508\_VR\_Bsu\_TripleSILACrep1\_pT1L1T2\_F21  
 Scannumber: 8720  
 Protein: BSU32260; hom; tdm  
 Peptide Score: 155.57  
 Method: ITMS; CID; 3

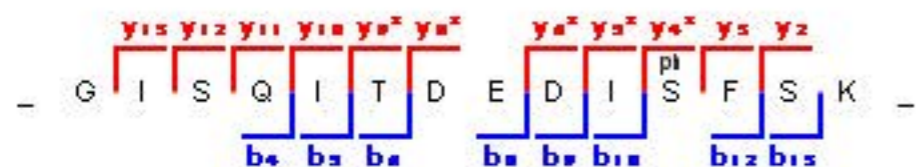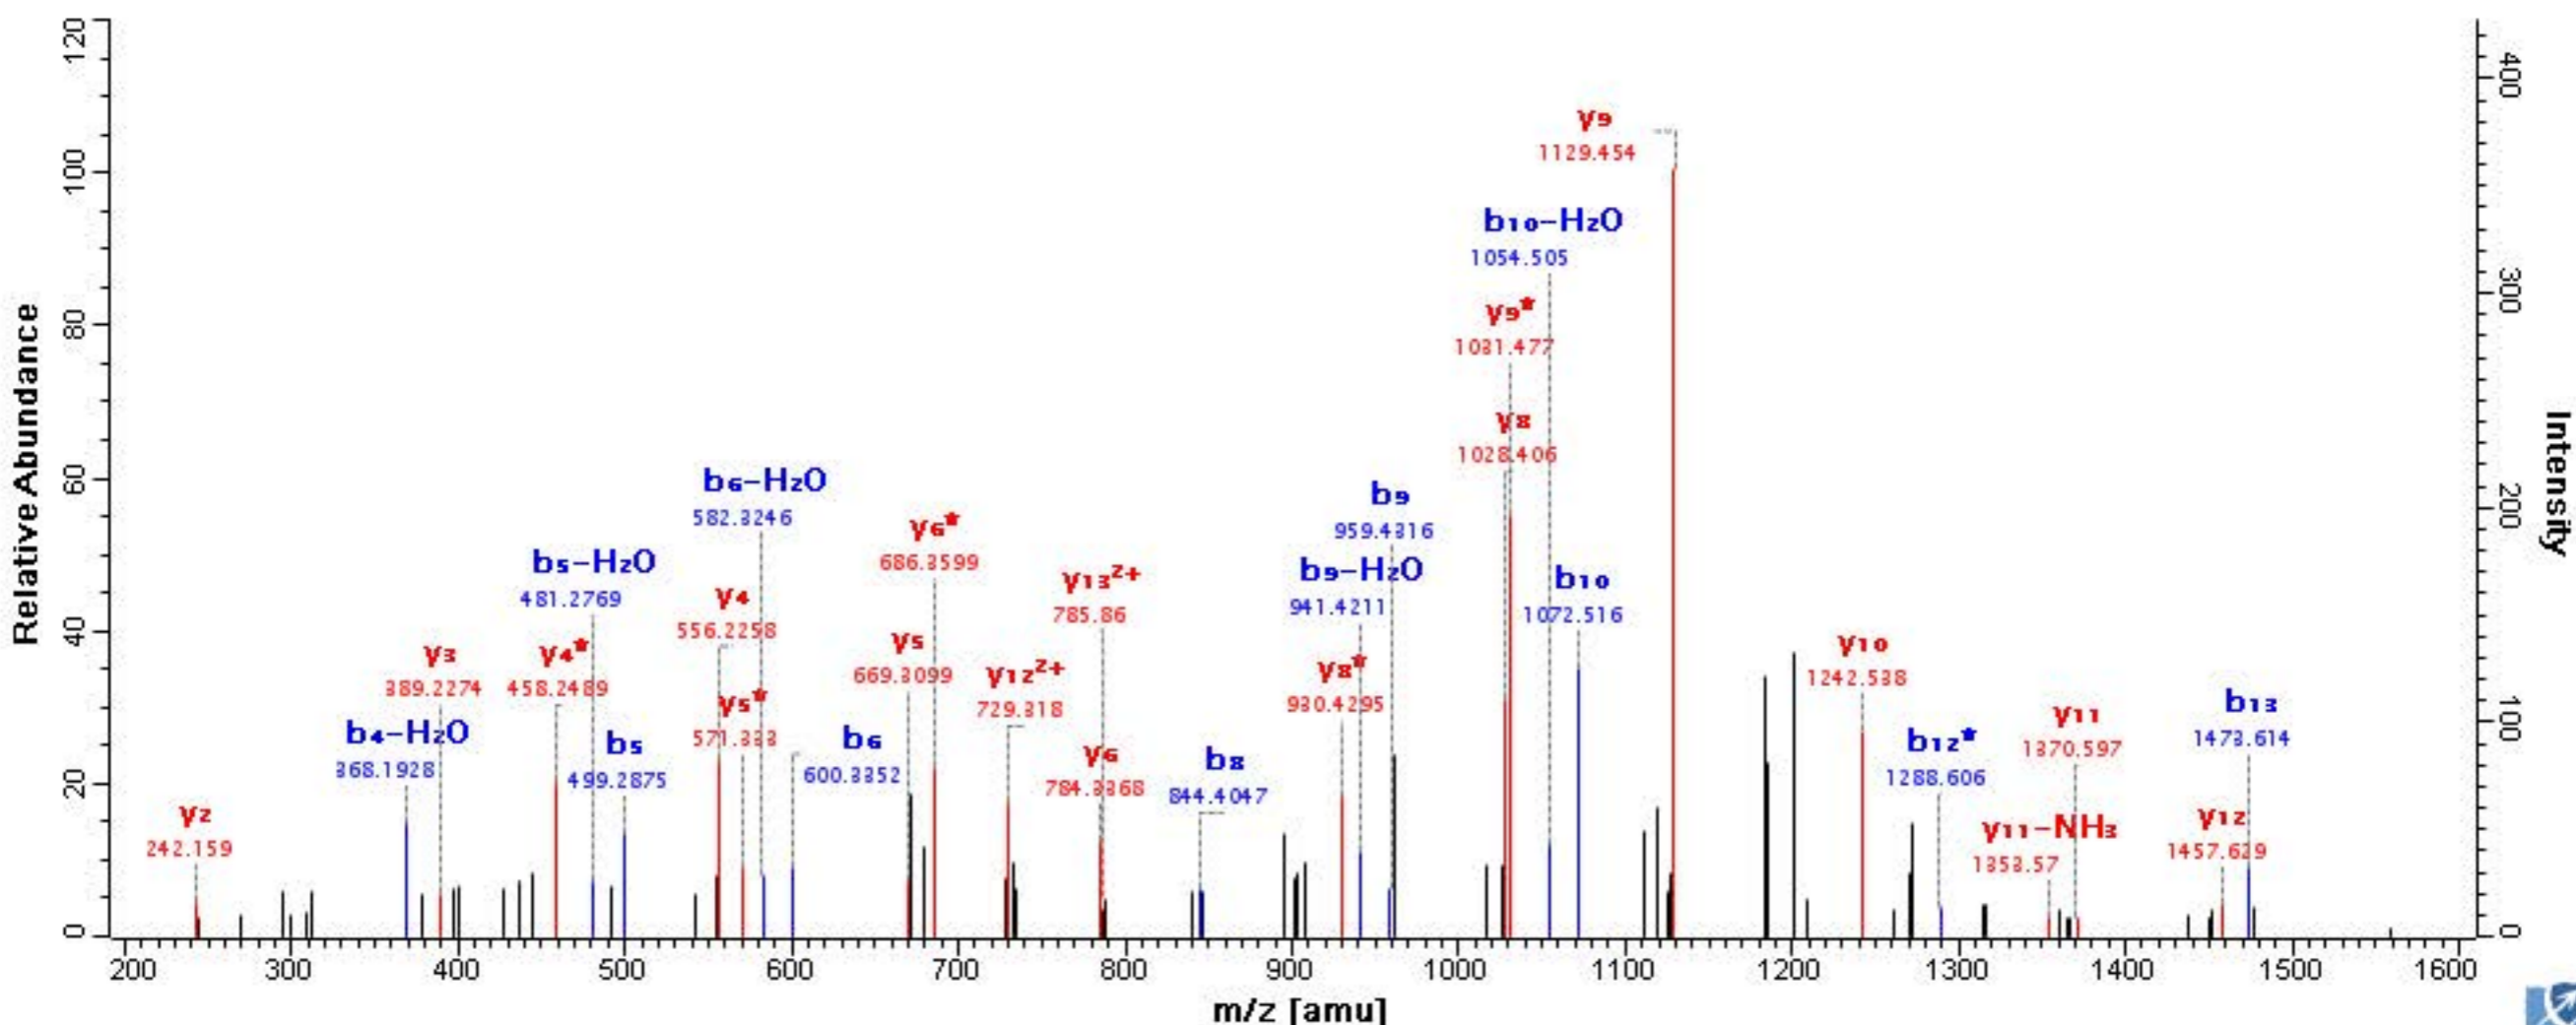

**precursor information**

|                   |                     |
|-------------------|---------------------|
| Mass:             | 1618.7133           |
| m/z:              | System.Collections. |
| Charge:           | System.Collections. |
| Retentiontime:    | System.Collections. |
| Score:            | 155.5715            |
| Mass Error [ppm]: | 0.34085             |
| PEP:              | 5.5702E-17          |
| Precursor Type:   | MULTI               |

**general information**

|                       |             |
|-----------------------|-------------|
| Annotation:           | 12 of 14    |
| AminoAcids Coverage:  | 86 %        |
| Intensity Coverage:   | 51 %        |
| Protein Localisation: | 227 ... 240 |

| b ion      |              |    |     |    | γ ion        |            | γ <sup>2+</sup> ion |            |
|------------|--------------|----|-----|----|--------------|------------|---------------------|------------|
| Δ dalton   | mass         |    | seq |    | Δ dalton     | mass       | Δ dalton            | mass       |
|            | 58.02874019  | 1  | G   | 13 |              |            |                     |            |
|            | 171.11280417 | 2  | I   | 12 | 1570.7127596 |            | 785.86001805        | -0.1592734 |
|            | 258.14483258 | 3  | S   | 11 | 1457.6286956 | -0.1283294 | 729.31798606        | +0.1174387 |
|            | 386.20341009 | 4  | Q   | 10 | 1370.5966672 | +0.0763064 | 1370.5966672        |            |
| +0.0983292 | 499.28747407 | 5  | I   | 9  | 1242.5380897 | +0.1152306 | 1242.5380897        |            |
| -0.0223474 | 600.33515255 | 6  | T   | 8  | 1129.4540257 | -0.1056371 | 1129.4540257        |            |
|            | 715.36209558 | 7  | D   | 7  | 1028.4063473 | -0.0130367 | 1028.4063473        |            |
| -0.231654  | 844.40468867 | 8  | E   | 6  | 913.37940424 |            | 913.37940424        |            |
| -0.4257723 | 959.43163171 | 9  | D   | 5  | 784.33681114 | +0.0787772 | 784.33681114        |            |
| +0.1422633 | 1072.5156957 | 10 | I   | 4  | 669.30986811 | +0.2880933 | 669.30986811        |            |
|            | 1239.5140545 | 11 | S   | 3  | 556.22580413 | +0.0132706 | 556.22580413        |            |
|            | 1386.5824684 | 12 | F   | 2  | 389.22744531 | +0.1298545 | 389.22744531        |            |
| +0.1001028 | 1473.6144968 | 13 | S   | 1  | 242.15903139 | +0.1690478 | 242.15903139        |            |
|            |              | 14 | K   | 0  | 155.12700298 |            | 155.12700298        |            |

Source: 20120508\_VR\_Bsu\_TripleSILACrep1\_pT1L1T2\_F23  
 Scannumber: 6089  
 Protein: BSU27320; greA  
 Peptide Score: 151.8  
 Method: ITMS; CID; 3

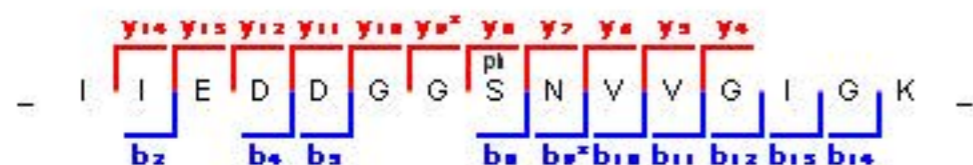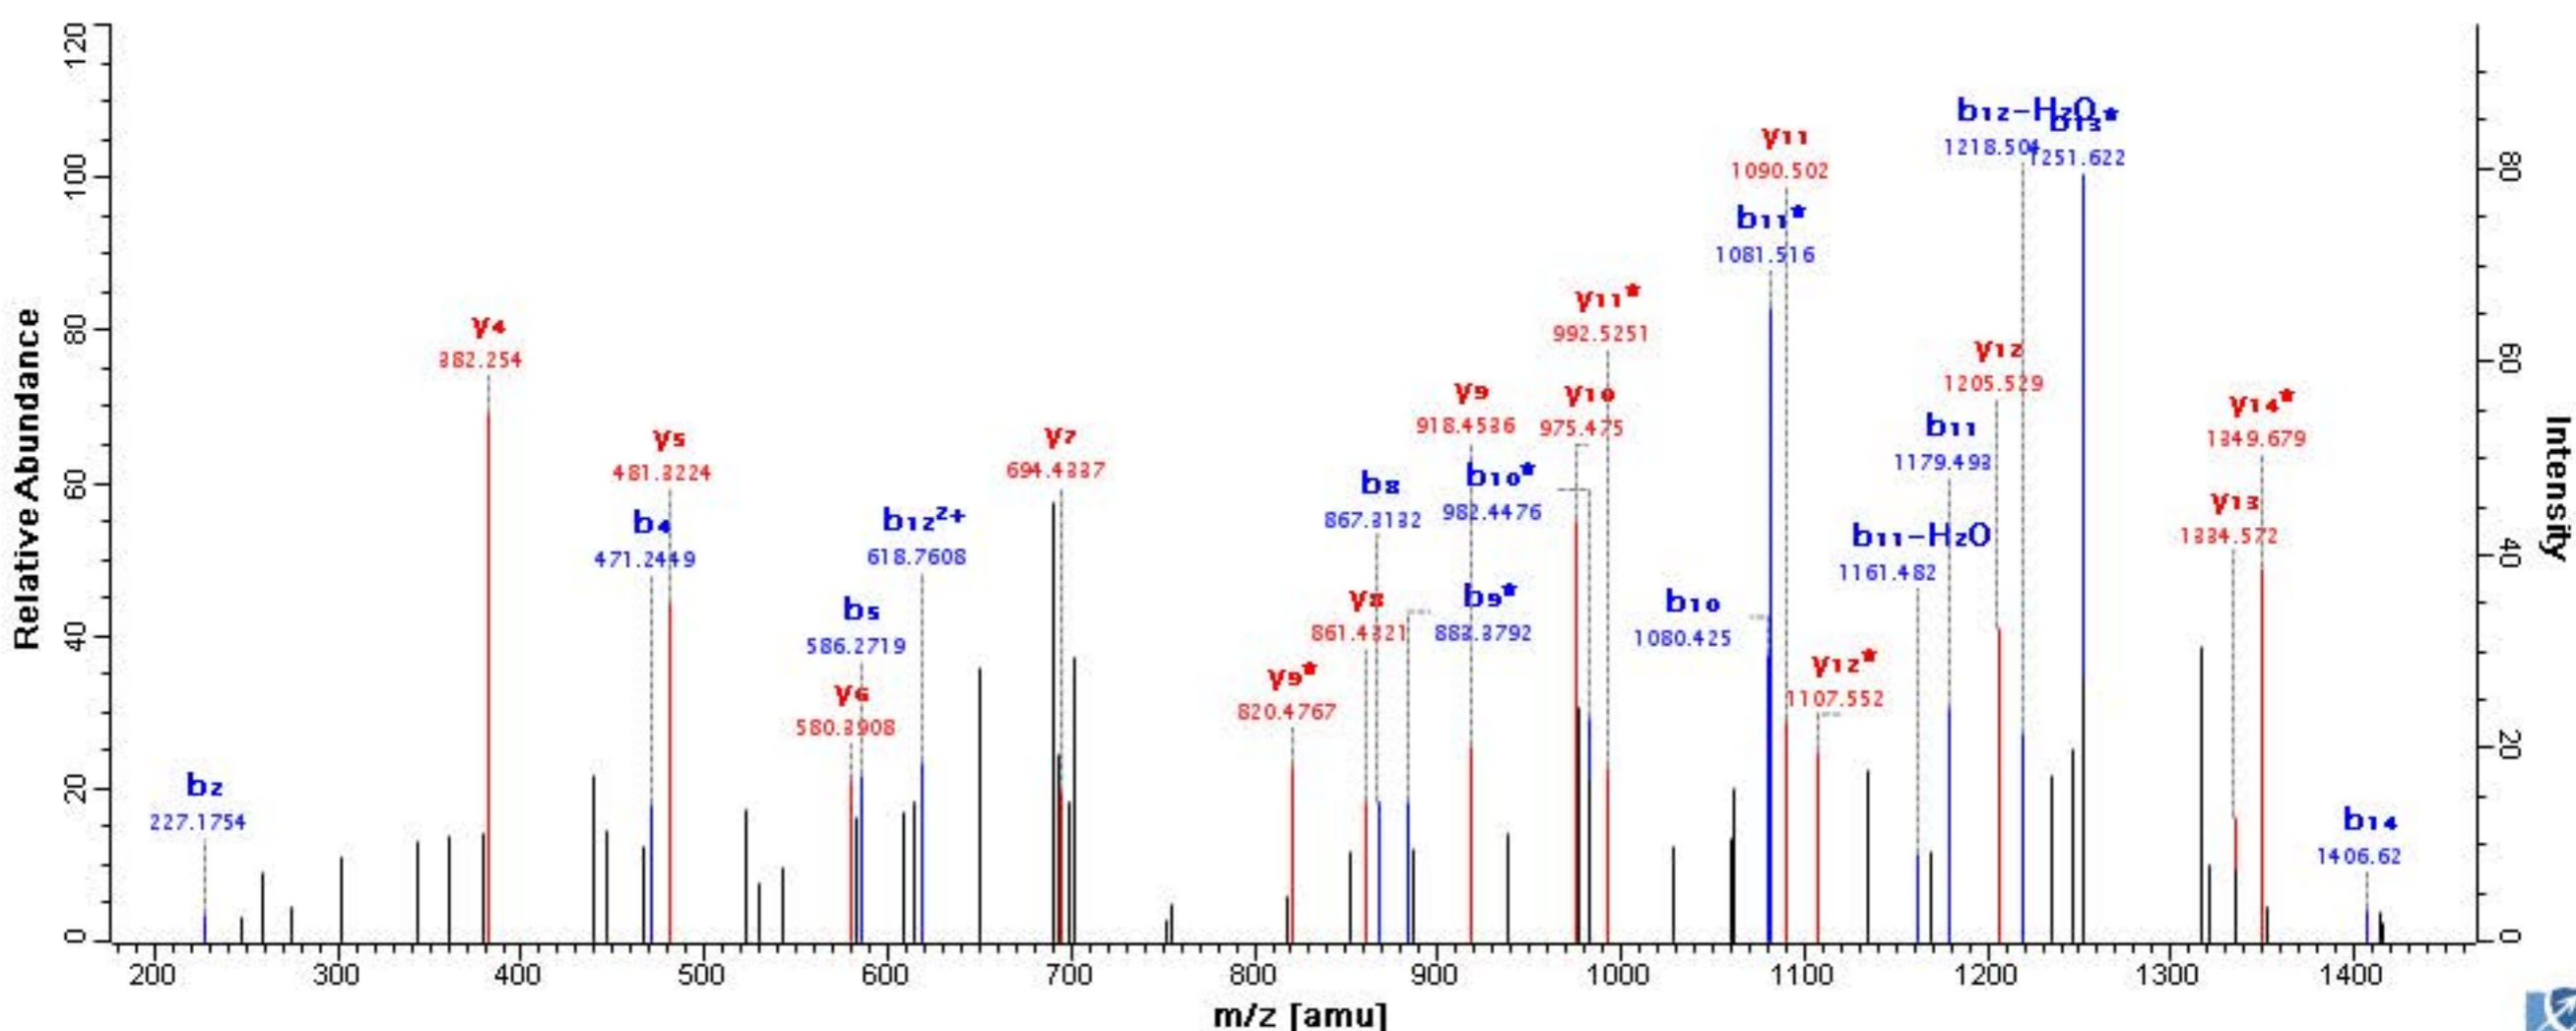

#### precursor information

|                   |                     |
|-------------------|---------------------|
| Mass:             | 1551.71758          |
| m/z:              | System.Collections. |
| Charge:           | System.Collections. |
| Retentiontime:    | System.Collections. |
| Score:            | 151.8               |
| Mass Error [ppm]: | -0.37485            |
| PEP:              | 4.0174E-17          |
| Precursor Type:   | MULTI               |

#### general information

|                       |           |
|-----------------------|-----------|
| Annotation:           | 13 of 15  |
| AminoAcids Coverag    | 87 %      |
| Intensity Coverage:   | 55 %      |
| Protein Localisation: | 77 ... 91 |

| b <sup>2+</sup> ion |              | b ion      |              |     | γ ion |          |                         |
|---------------------|--------------|------------|--------------|-----|-------|----------|-------------------------|
| Δ dalton            | mass         | Δ dalton   | mass         | seq |       | Δ dalton | mass                    |
|                     | 114.09134045 |            | 114.09134045 | 1   | I     | 14       |                         |
|                     | 227.17540443 | -0.0412949 | 227.17540443 | 2   | I     | 13       | 1447.6555791            |
|                     | 356.21799752 |            | 356.21799752 | 3   | E     | 12       | 1334.5715151 +0.0819273 |
|                     | 471.24494056 | +0.1108334 | 471.24494056 | 4   | D     | 11       | 1205.528922 +0.1121913  |
|                     | 586.27188359 | +0.0002722 | 586.27188359 | 5   | D     | 10       | 1090.501979 -0.1090347  |
|                     | 643.29334731 |            | 643.29334731 | 6   | G     | 9        | 975.47503596 +0.122193  |
|                     | 700.31481103 |            | 700.31481103 | 7   | G     | 8        | 918.45357223 +0.0561324 |
|                     | 867.31316985 | +0.0767838 | 867.31316985 | 8   | S     | 7        | 861.43210851 -0.0553385 |
|                     | 981.3560973  |            | 981.3560973  | 9   | N     | 6        | 694.43374969 +0.0739407 |
|                     | 1080.4245112 | +0.2837407 | 1080.4245112 | 10  | V     | 5        | 580.39082224 +0.0690777 |
|                     | 1179.4929251 | +0.224238  | 1179.4929251 | 11  | V     | 4        | 481.32240833 +0.049723  |
| -0.1490773          | 618.76083266 |            | 1236.5143889 | 12  | G     | 3        | 382.25399441 +0.151157  |
|                     | 1349.5984528 |            | 1349.5984528 | 13  | I     | 2        | 325.23253069            |
|                     | 1406.6199166 | -0.0052925 | 1406.6199166 | 14  | G     | 1        | 212.14846671            |
|                     |              |            |              | 15  | K     | 0        | 155.12700298            |

Source: 20120508\_VR\_Bsu\_TripleSILACrep1\_pT1L1T2\_F23  
 Scannumber: 6207  
 Protein: BSU03790; yclM  
 Peptide Score: 121.45  
 Method: ITMS; CID; 3

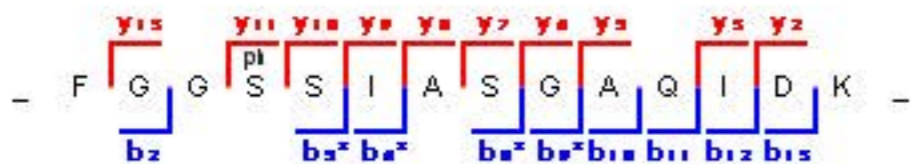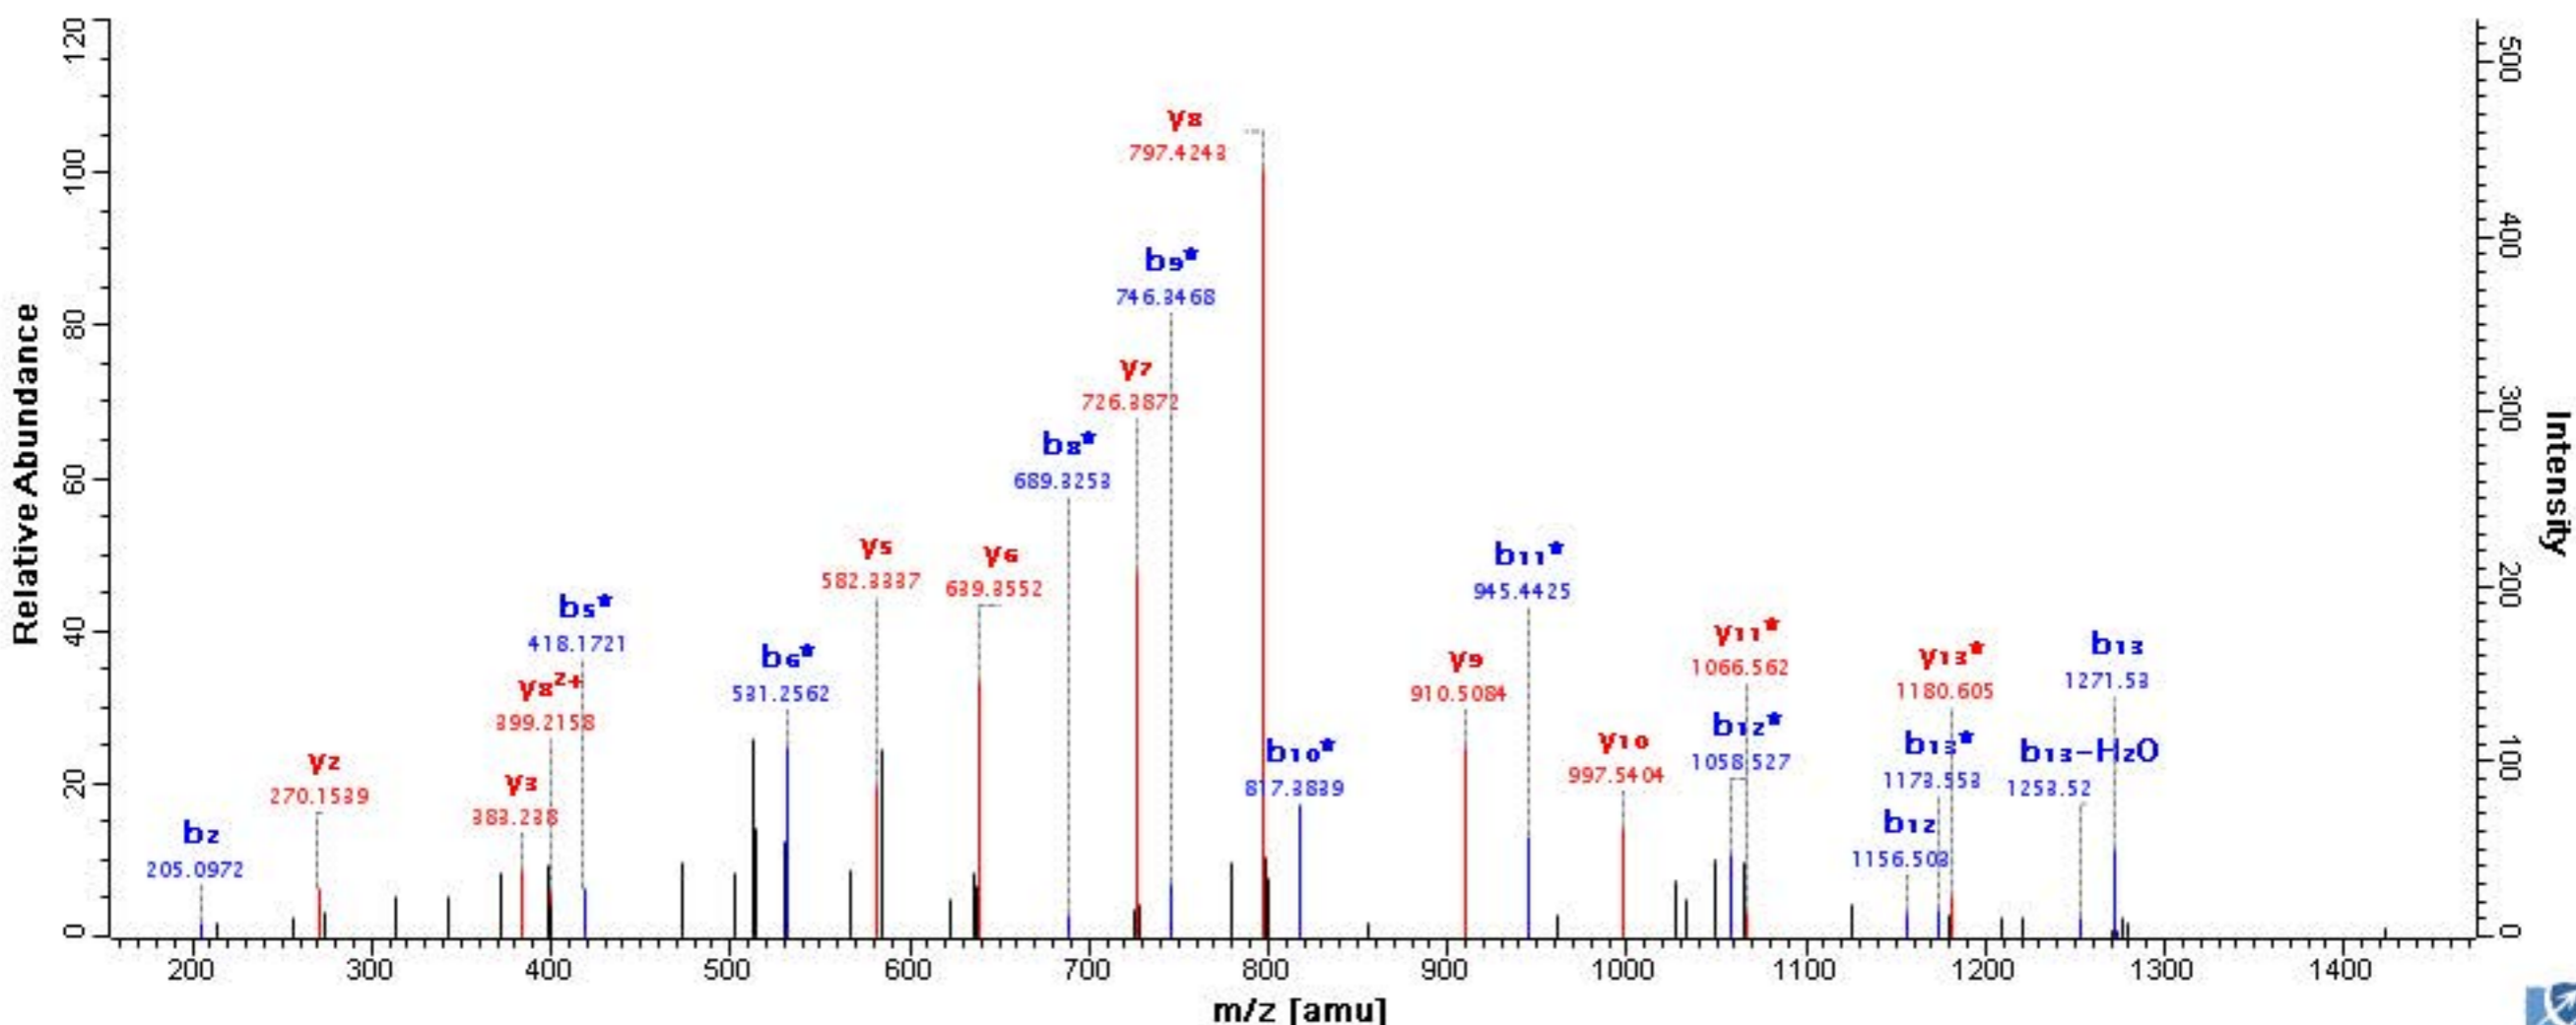

#### precursor information

|                   |                     |
|-------------------|---------------------|
| Mass:             | 1416.62897          |
| m/z:              | System.Collections. |
| Charge:           | System.Collections. |
| Retentiontime:    | System.Collections. |
| Score:            | 121.4488            |
| Mass Error [ppm]: | 0.2397              |
| PEP:              | 0.00015885          |
| Precursor Type:   | MULTI               |

#### general information

|                       |          |
|-----------------------|----------|
| Annotation:           | 11 of 14 |
| AminoAcids Coverage:  | 79 %     |
| Intensity Coverage:   | 58 %     |
| Protein Localisation: | 6 ... 19 |

| b ion      |              |    |     |    | y ion        |            | y <sup>2+</sup> ion |          |
|------------|--------------|----|-----|----|--------------|------------|---------------------|----------|
| Δ dalton   | mass         |    | seq |    | Δ dalton     | mass       | Δ dalton            | mass     |
|            | 148.07569038 | 1  | F   | 13 |              |            |                     |          |
| +0.0292497 | 205.09715411 | 2  | G   | 12 | 1278.5816859 |            | 1278.5816859        |          |
|            | 262.11861783 | 3  | G   | 11 | 1221.5602221 |            | 1221.5602221        |          |
|            | 429.11697665 | 4  | S   | 10 | 1164.5387584 |            | 1164.5387584        |          |
|            | 516.14900506 | 5  | S   | 9  | 997.54039961 | +0.1090145 | 997.54039961        |          |
|            | 629.23306904 | 6  | I   | 8  | 910.5083712  | +0.0673124 | 910.5083712         |          |
|            | 700.27018283 | 7  | A   | 7  | 797.42430722 | +0.0454193 | 399.21579184        | +0.38455 |
|            | 787.30221124 | 8  | S   | 6  | 726.38719343 | -0.0488756 | 726.38719343        |          |
|            | 844.32367496 | 9  | G   | 5  | 639.35516502 | +0.1004014 | 639.35516502        |          |
|            | 915.36078875 | 10 | A   | 4  | 582.3337013  | -0.4253761 | 582.3337013         |          |
|            | 1043.4193663 | 11 | Q   | 3  | 511.29658751 |            | 511.29658751        |          |
| +0.1924926 | 1156.5034302 | 12 | I   | 2  | 383.23801    | +0.0586819 | 383.23801           |          |
| +0.1914285 | 1271.5303733 | 13 | D   | 1  | 270.15394602 | +0.0410003 | 270.15394602        |          |
|            |              | 14 | K   | 0  | 155.12700298 |            | 155.12700298        |          |

Source: 20120508\_VR\_Bsu\_TripleSILACrep1\_pT1L1T2\_F23  
 Scannumber: 6969  
 Protein: BSU40420; purA  
 Peptide Score: 142.54  
 Method: ITMS; CID; 3

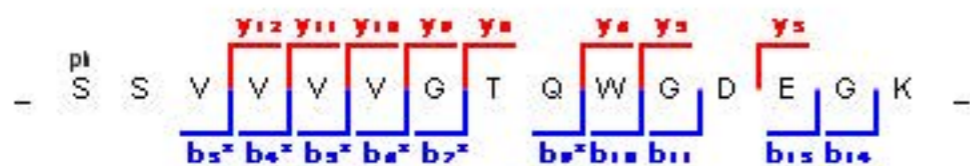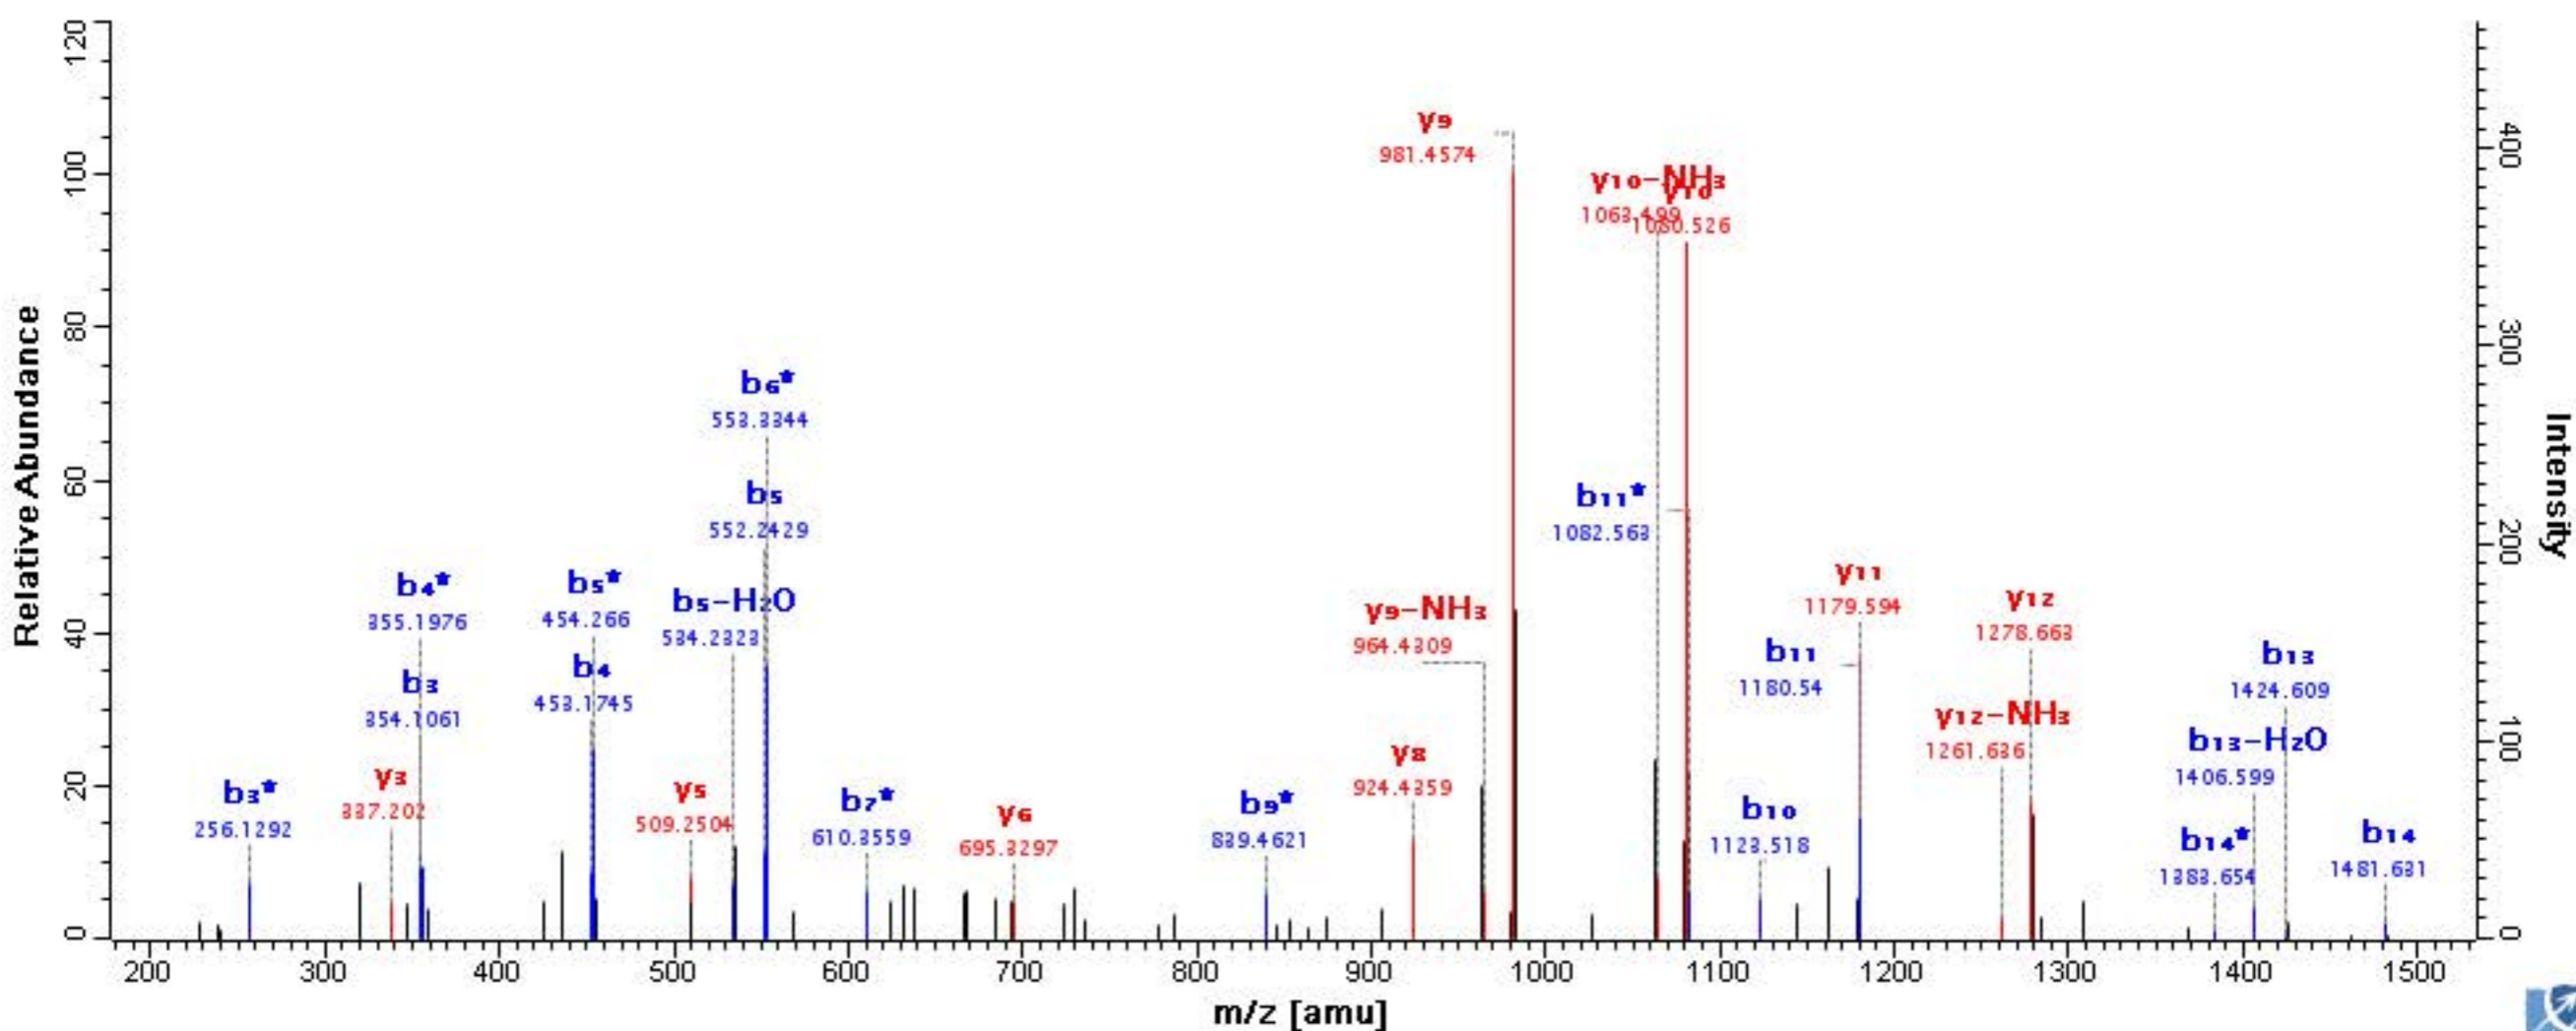

**precursor information**

|                   |                     |
|-------------------|---------------------|
| Mass:             | 1626.72942          |
| m/z:              | System.Collections. |
| Charge:           | System.Collections. |
| Retentiontime:    | System.Collections. |
| Score:            | 142.5404            |
| Mass Error [ppm]: | 0.21733             |
| PEP:              | 2.9414E-11          |
| Precursor Type:   | MULTI               |

**general information**

|                       |          |
|-----------------------|----------|
| Annotation:           | 12 of 15 |
| AminoAcids Coverag    | 80 %     |
| Intensity Coverage:   | 60 %     |
| Protein Localisation: | 2 ... 16 |

| b ion           |                |    |     |    |                 | y ion      |  |
|-----------------|----------------|----|-----|----|-----------------|------------|--|
| $\Delta$ dalton | mass           |    | seq |    | $\Delta$ dalton | mass       |  |
|                 | 168.005635285  | 1  | S   | 14 |                 |            |  |
|                 | 255.037663695  | 2  | S   | 13 | 1464.763091467  |            |  |
| +0.0419326      | 354.106077611  | 3  | V   | 12 | 1377.731063057  |            |  |
| +0.0275959      | 453.174491527  | 4  | V   | 11 | 1278.662649141  | +0.0413304 |  |
| +0.1264793      | 552.242905443  | 5  | V   | 10 | 1179.594235225  | +0.2385284 |  |
|                 | 651.31131936   | 6  | V   | 9  | 1080.525821308  | +0.0314297 |  |
|                 | 708.332783083  | 7  | G   | 8  | 981.457407392   | +0.1147972 |  |
|                 | 809.380461557  | 8  | T   | 7  | 924.435943669   | +0.0350646 |  |
|                 | 937.439039069  | 9  | Q   | 6  | 823.388265194   |            |  |
| -0.1803393      | 1123.518352022 | 10 | W   | 5  | 695.329687683   | -0.0925051 |  |
| +0.242655       | 1180.539815746 | 11 | G   | 4  | 509.25037473    | +0.0636511 |  |
|                 | 1295.566758778 | 12 | D   | 3  | 452.228911006   |            |  |
| +0.1732409      | 1424.609351874 | 13 | E   | 2  | 337.201967974   | -0.004092  |  |
| -0.1878224      | 1481.630815598 | 14 | G   | 1  | 208.159374878   |            |  |
|                 |                | 15 | K   | 0  | 151.137911154   |            |  |



Source: 20120514\_VR\_Bsu\_TripleSILACrep1\_pL2ESLS\_F07  
 Scannumber: 11562  
 Protein: BSU19370; citK; odhA  
 Peptide Score: 95.21  
 Method: ITMS; CID; 3

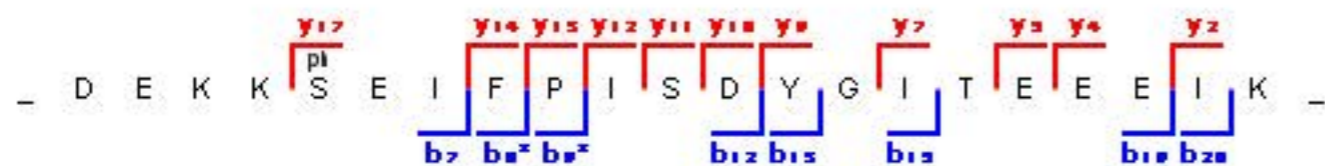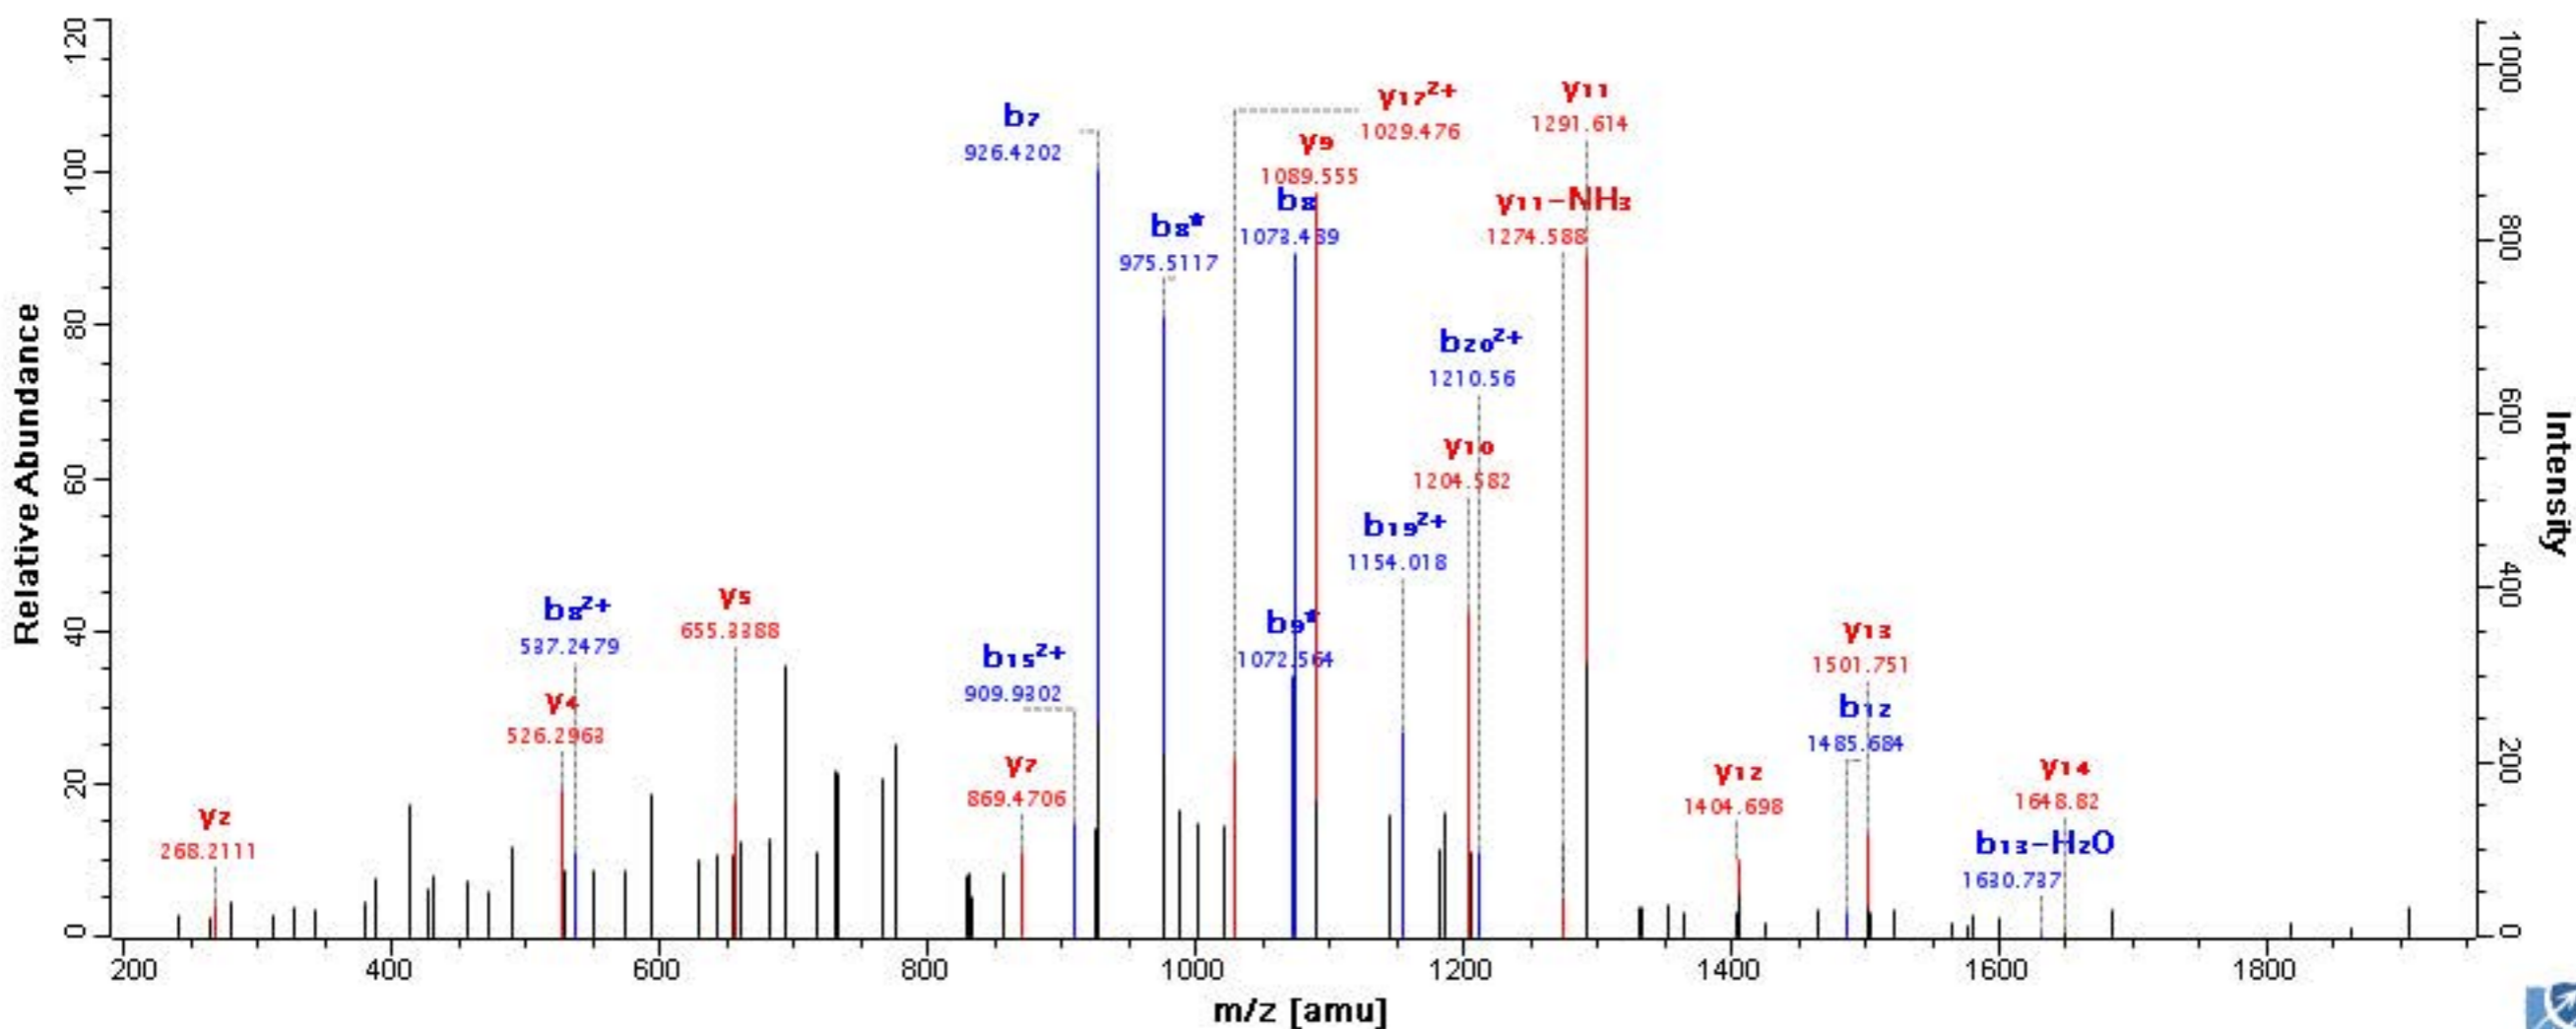

#### precursor information

|                   |                     |
|-------------------|---------------------|
| Mass:             | 2573.22695          |
| m/z:              | System.Collections. |
| Charge:           | System.Collections. |
| Retentiontime:    | System.Collections. |
| Score:            | 95.20509            |
| Mass Error [ppm]: | 0.68433             |
| PEP:              | 0.006057            |
| Precursor Type:   | ISO                 |

| b <sup>2+</sup> ion |          | b ion     |          |    |     |    | y ion    |           | y <sup>2+</sup> ion |           |
|---------------------|----------|-----------|----------|----|-----|----|----------|-----------|---------------------|-----------|
| Δ dalton            | mass     | Δ dalton  | mass     |    | seq |    | Δ dalton | mass      | Δ dalton            | mass      |
|                     | 116.0342 |           | 116.0342 | 1  | D   | 20 |          |           |                     |           |
|                     | 245.0768 |           | 245.0768 | 2  | E   | 19 | 2459.206 |           | 2459.206            |           |
|                     | 381.186  |           | 381.186  | 3  | K   | 18 | 2330.163 |           | 2330.163            |           |
|                     | 517.2951 |           | 517.2951 | 4  | K   | 17 | 2194.054 |           | 2194.054            |           |
|                     | 684.2935 |           | 684.2935 | 5  | S   | 16 | 2057.945 |           | 1029.476            | -0.393424 |
|                     | 813.3361 |           | 813.3361 | 6  | E   | 15 | 1890.946 |           | 1890.946            |           |
|                     | 926.4202 | +0.022292 | 926.4202 | 7  | I   | 14 | 1761.904 |           | 1761.904            |           |
| -0.145626           | 537.2479 | +0.111532 | 1073.489 | 8  | F   | 13 | 1648.82  | +0.291612 | 1648.82             |           |
|                     | 1170.541 |           | 1170.541 | 9  | P   | 12 | 1501.751 | +0.134928 | 1501.751            |           |
|                     | 1283.625 |           | 1283.625 | 10 | I   | 11 | 1404.698 | +0.09321  | 1404.698            |           |
|                     | 1370.657 |           | 1370.657 | 11 | S   | 10 | 1291.614 | -0.018527 | 1291.614            |           |
|                     | 1485.684 | +0.250327 | 1485.684 | 12 | D   | 9  | 1204.582 | -0.056079 | 1204.582            |           |
|                     | 1648.748 |           | 1648.748 | 13 | Y   | 8  | 1089.555 | +0.017983 | 1089.555            |           |
|                     | 1705.769 |           | 1705.769 | 14 | G   | 7  | 926.4921 |           | 926.4921            |           |
| -0.058179           | 909.9302 |           | 1818.853 | 15 | I   | 6  | 869.4706 | -0.103889 | 869.4706            |           |
|                     | 1919.901 |           | 1919.901 | 16 | T   | 5  | 756.3865 |           | 756.3865            |           |
|                     | 2048.943 |           | 2048.943 | 17 | E   | 4  | 655.3388 | +0.074789 | 655.3388            |           |
|                     | 2177.986 |           | 2177.986 | 18 | E   | 3  | 526.2963 | -0.133045 | 526.2963            |           |
| +0.39584            | 1154.018 |           | 2307.029 | 19 | E   | 2  | 397.2537 |           | 397.2537            |           |
| +0.400439           | 1210.56  |           | 2420.113 | 20 | I   | 1  | 268.2111 | +0.075951 | 268.2111            |           |
|                     |          |           |          | 21 | K   | 0  | 155.127  |           | 155.127             |           |

#### general information

|                       |             |
|-----------------------|-------------|
| Annotation:           | 14 of 21    |
| AminoAcids Coverage:  | 67 %        |
| Intensity Coverage:   | 51 %        |
| Protein Localisation: | 101 ... 121 |

Source: 20120514\_VR\_Bsu\_TripleSILACrep1\_pL2ESLS\_F07  
 Scannumber: 14106  
 Protein: BSU22730; ndk  
 Peptide Score: 102.69  
 Method: ITMS; CID; 3

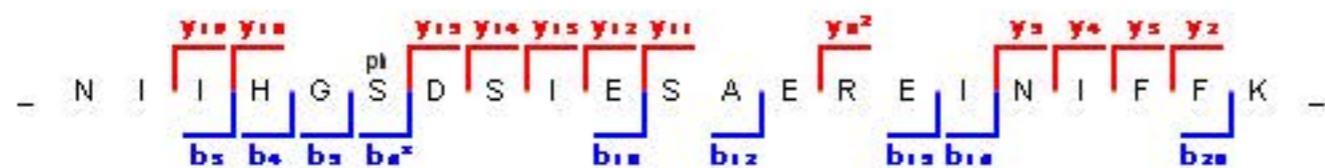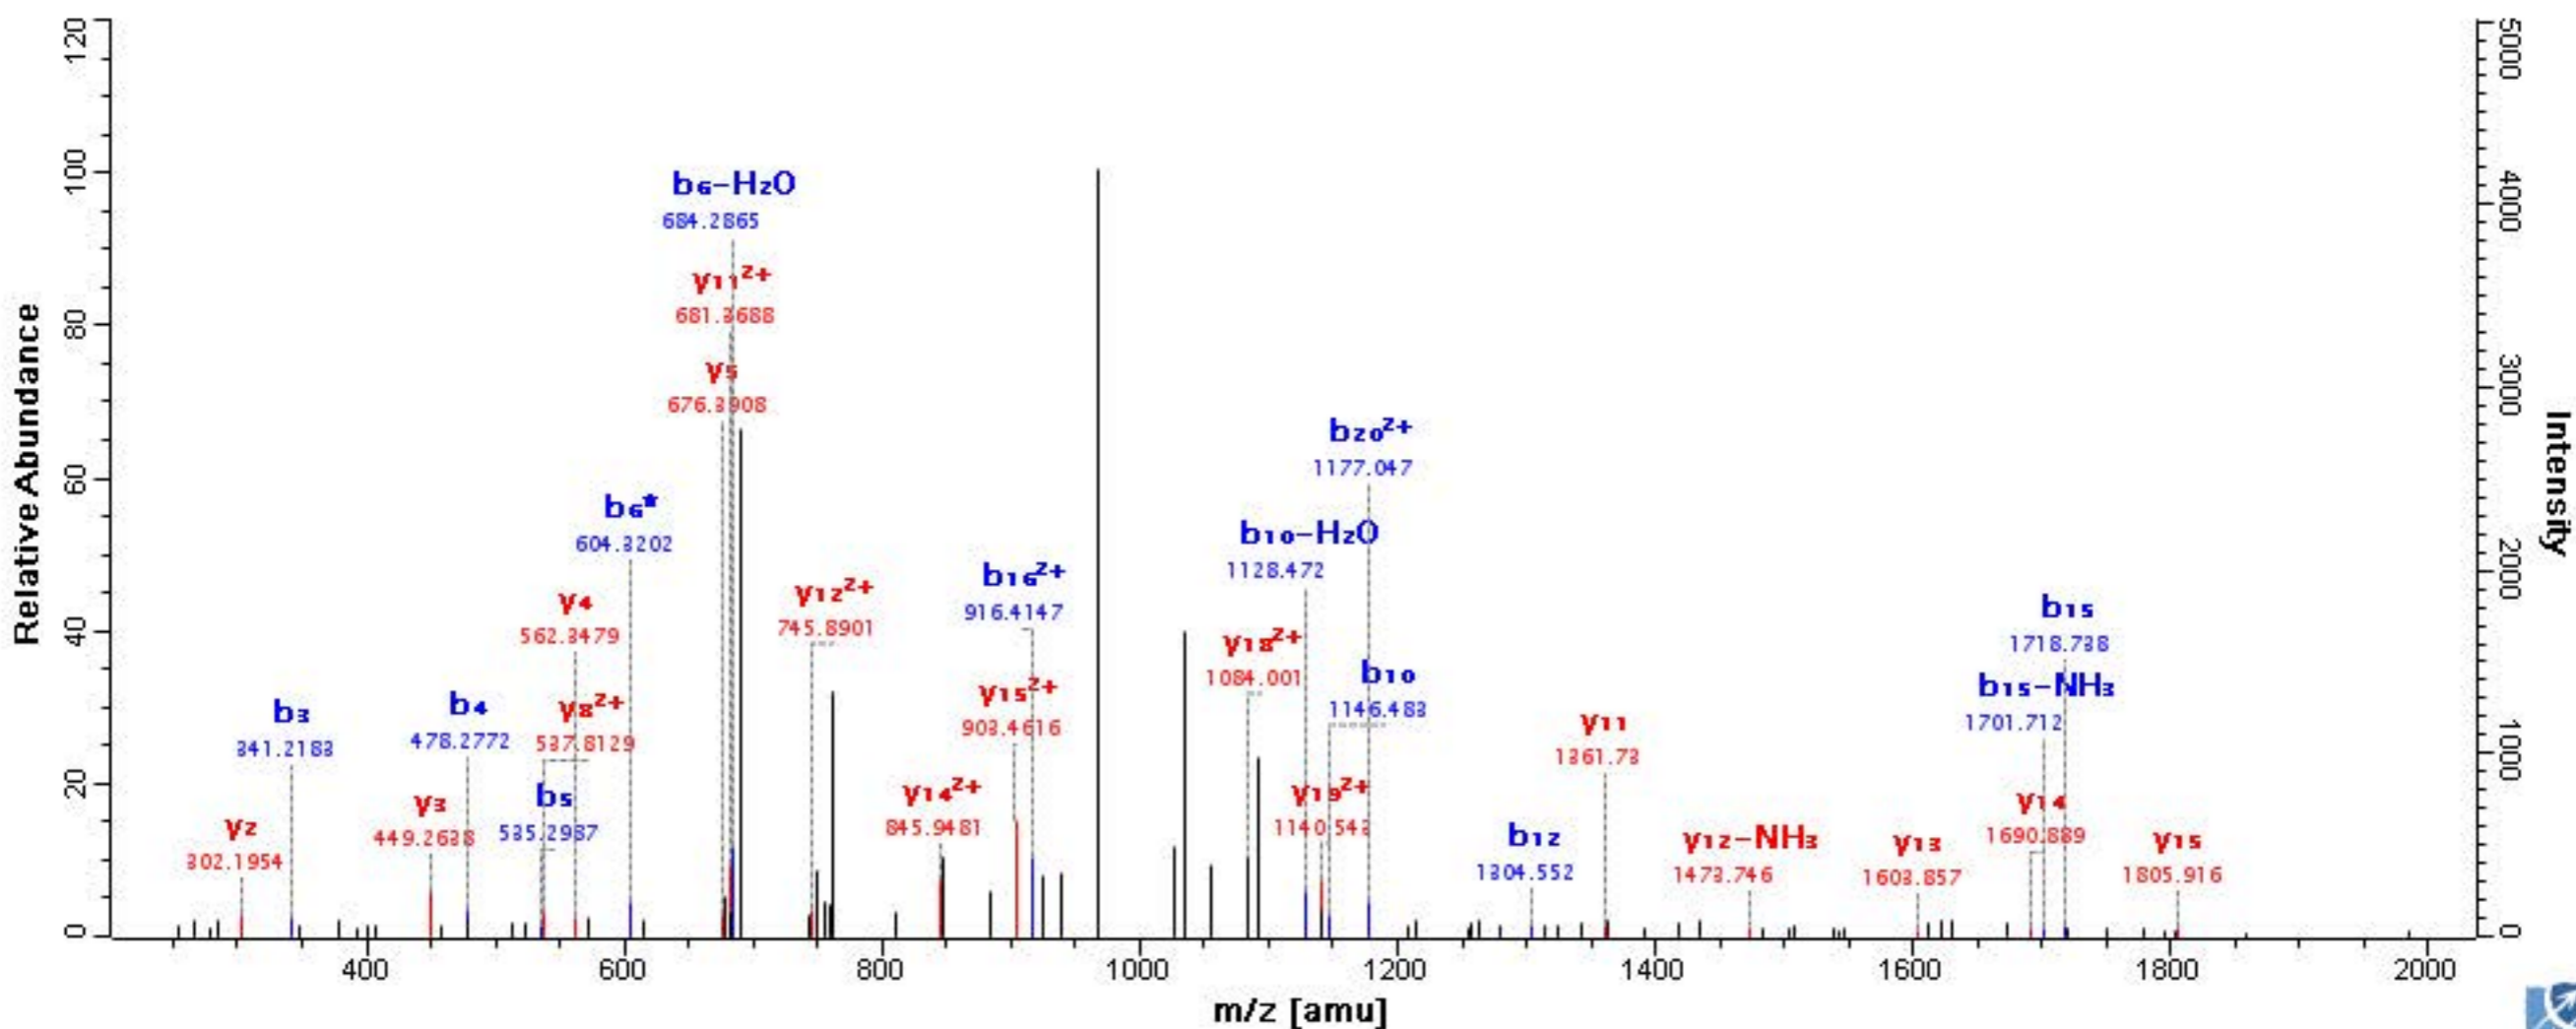

#### precursor information

|                   |                     |
|-------------------|---------------------|
| Mass:             | 2506.19961          |
| m/z:              | System.Collections. |
| Charge:           | System.Collections. |
| Retentiontime:    | System.Collections. |
| Score:            | 102.6893            |
| Mass Error [ppm]: | 0.45608             |
| PEP:              | 0.00065519          |
| Precursor Type:   | ISO                 |

| b <sup>2+</sup> ion |          | b ion     |          |    |     |    | γ ion    |           | γ <sup>2+</sup> ion |           |
|---------------------|----------|-----------|----------|----|-----|----|----------|-----------|---------------------|-----------|
| Δ dalton            | mass     | Δ dalton  | mass     |    | seq |    | Δ dalton | mass      | Δ dalton            | mass      |
|                     | 115.0502 |           | 115.0502 | 1  | N   | 20 |          |           |                     |           |
|                     | 228.1343 |           | 228.1343 | 2  | I   | 19 | 2393.163 |           | 2393.163            |           |
|                     | 341.2183 | +0.058951 | 341.2183 | 3  | I   | 18 | 2280.079 |           | 1140.543            | +0.140457 |
|                     | 478.2772 | +0.031472 | 478.2772 | 4  | H   | 17 | 2166.995 |           | 1084.001            | +0.033197 |
|                     | 535.2987 | +0.340514 | 535.2987 | 5  | G   | 16 | 2029.936 |           | 2029.936            |           |
|                     | 702.2971 |           | 702.2971 | 6  | S   | 15 | 1972.914 |           | 1972.914            |           |
|                     | 817.324  |           | 817.324  | 7  | D   | 14 | 1805.916 | +0.100892 | 903.4616            | +0.417291 |
|                     | 904.356  |           | 904.356  | 8  | S   | 13 | 1690.889 | +0.169949 | 845.9481            | +0.026954 |
|                     | 1017.44  |           | 1017.44  | 9  | I   | 12 | 1603.857 | +0.355175 | 1603.857            |           |
|                     | 1146.483 | -0.226957 | 1146.483 | 10 | E   | 11 | 1490.773 |           | 745.8901            | -0.037559 |
|                     | 1233.515 |           | 1233.515 | 11 | S   | 10 | 1361.73  | -0.089457 | 681.3688            | +0.229771 |
|                     | 1304.552 | -0.384479 | 1304.552 | 12 | A   | 9  | 1274.698 |           | 1274.698            |           |
|                     | 1433.594 |           | 1433.594 | 13 | E   | 8  | 1203.661 |           | 1203.661            |           |
|                     | 1589.696 |           | 1589.696 | 14 | R   | 7  | 1074.619 |           | 537.8129            | +0.272577 |
|                     | 1718.738 | -0.103491 | 1718.738 | 15 | E   | 6  | 918.5175 |           | 918.5175            |           |
| -0.403812           | 916.4147 |           | 1831.822 | 16 | I   | 5  | 789.4749 |           | 789.4749            |           |
|                     | 1945.865 |           | 1945.865 | 17 | N   | 4  | 676.3908 | +0.192979 | 676.3908            |           |
|                     | 2058.949 |           | 2058.949 | 18 | I   | 3  | 562.3479 | +0.068304 | 562.3479            |           |
|                     | 2206.018 |           | 2206.018 | 19 | F   | 2  | 449.2638 | +0.004358 | 449.2638            |           |
| -0.078629           | 1177.047 |           | 2353.086 | 20 | F   | 1  | 302.1954 | +0.011065 | 302.1954            |           |
|                     |          |           |          | 21 | K   | 0  | 155.127  |           | 155.127             |           |

#### general information

|                       |             |
|-----------------------|-------------|
| Annotation:           | 17 of 21    |
| AminoAcids Coverag    | 81 %        |
| Intensity Coverage:   | 21 %        |
| Protein Localisation: | 113 ... 133 |

Source: 20120514\_VR\_Bsu\_TripleSILACrep1\_pL2ESLS\_F07  
 Scannumber: 4070  
 Protein: bioYB; BSU32030; yuiG  
 Peptide Score: 132.25  
 Method: ITMS; CID; 3

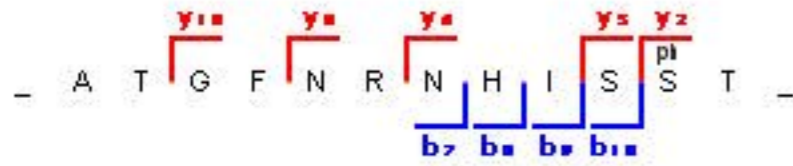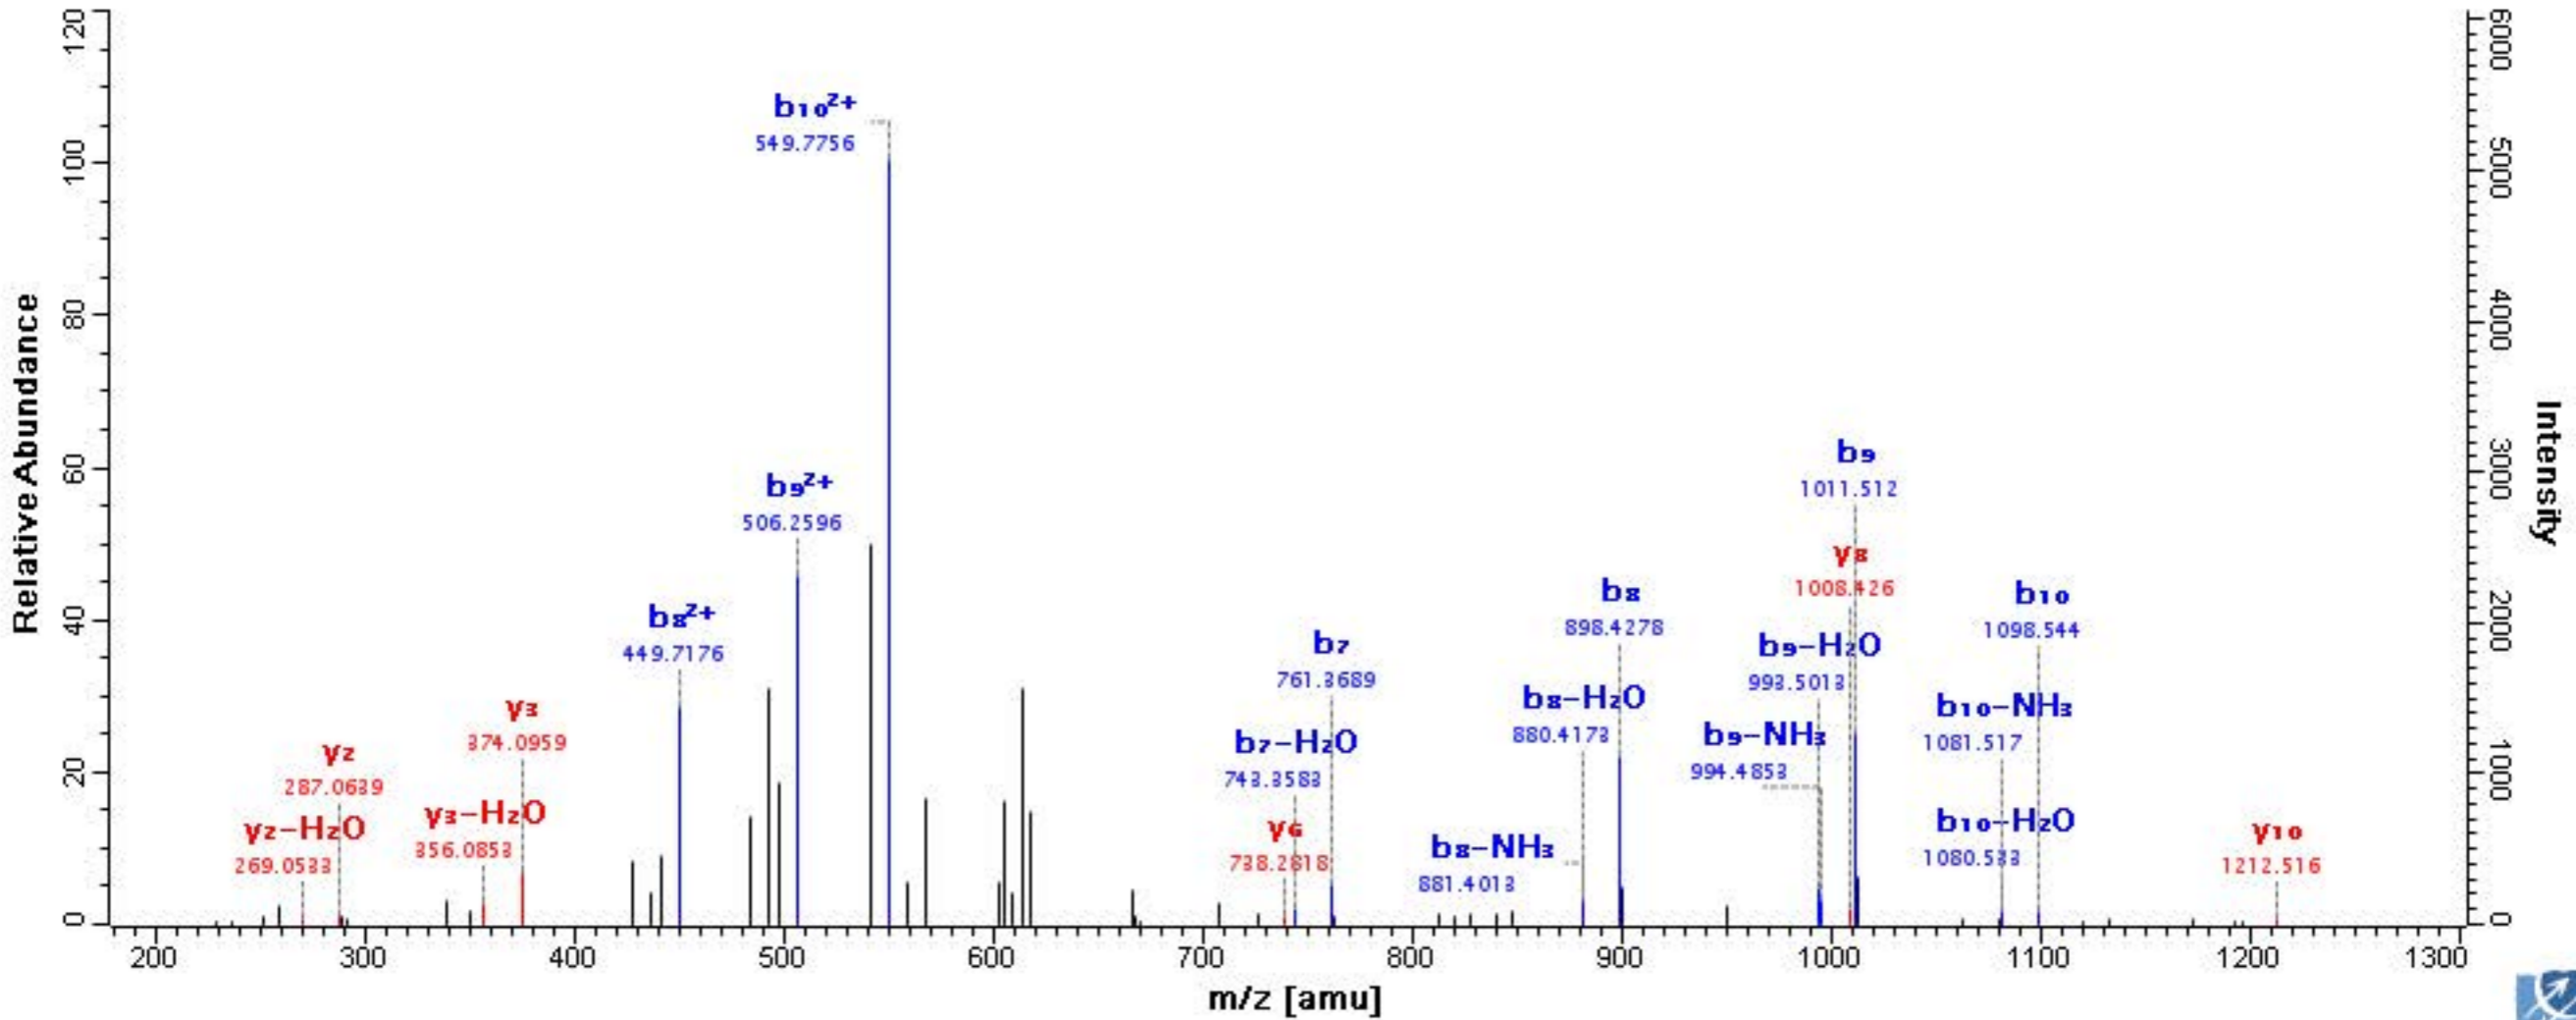

**precursor information**

|                   |                     |
|-------------------|---------------------|
| Mass:             | 1383.59238          |
| m/z:              | System.Collections. |
| Charge:           | System.Collections. |
| Retentiontime:    | System.Collections. |
| Score:            | 132.2496            |
| Mass Error [ppm]: | -0.61988            |
| PEP:              | 0.0059303           |
| Precursor Type:   | ISO                 |

**general information**

|                       |             |
|-----------------------|-------------|
| Annotation:           | 7 of 12     |
| AminoAcids Coverage:  | 58 %        |
| Intensity Coverage:   | 49 %        |
| Protein Localisation: | 189 ... 200 |

| b <sup>2+</sup> ion |              | b ion      |              |     | y ion |          |                         |
|---------------------|--------------|------------|--------------|-----|-------|----------|-------------------------|
| Δ dalton            | mass         | Δ dalton   | mass         | seq |       | Δ dalton | mass                    |
|                     | 72.044390254 |            | 72.044390254 | 1   | A     | 11       |                         |
|                     | 173.09206873 |            | 173.09206873 | 2   | T     | 10       | 1313.5634047            |
|                     | 230.11353245 |            | 230.11353245 | 3   | G     | 9        | 1212.5157263 +0.3955286 |
|                     | 377.18194637 |            | 377.18194637 | 4   | F     | 8        | 1155.4942625            |
|                     | 491.22487382 |            | 491.22487382 | 5   | N     | 7        | 1008.4258486 -0.0545107 |
|                     | 647.32598484 |            | 647.32598484 | 6   | R     | 6        | 894.38292117            |
|                     | 761.36891229 | +0.1064905 | 761.36891229 | 7   | N     | 5        | 738.28181015 -0.0210069 |
| +0.1742344          | 449.71755031 | +0.0508746 | 898.42782415 | 8   | H     | 4        | 624.2388827             |
| +0.1550906          | 506.2595823  | +0.0156998 | 1011.5118881 | 9   | I     | 3        | 487.17997084            |
| +0.0704118          | 549.77559651 | -0.1413287 | 1098.5439165 | 10  | S     | 2        | 374.09590686 +0.1512245 |
|                     | 1265.5422754 |            | 1265.5422754 | 11  | S     | 1        | 287.06387845 +0.0443979 |
|                     |              |            |              | 12  | T     | 0        | 120.06551963            |

Source: 20120514\_VR\_Bsu\_TripleSILACrep1\_pL2ESLS\_F07  
 Scannumber: 7500  
 Protein: BSU28290; ilvC  
 Peptide Score: 79.35  
 Method: ITMS; CID; 3

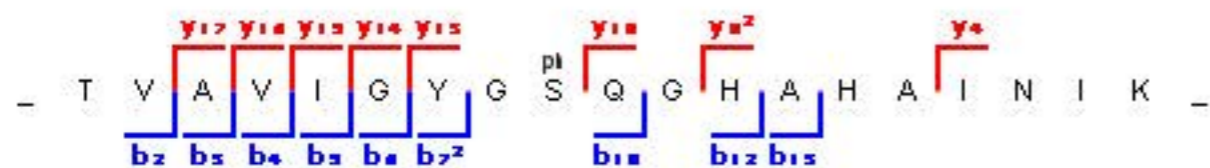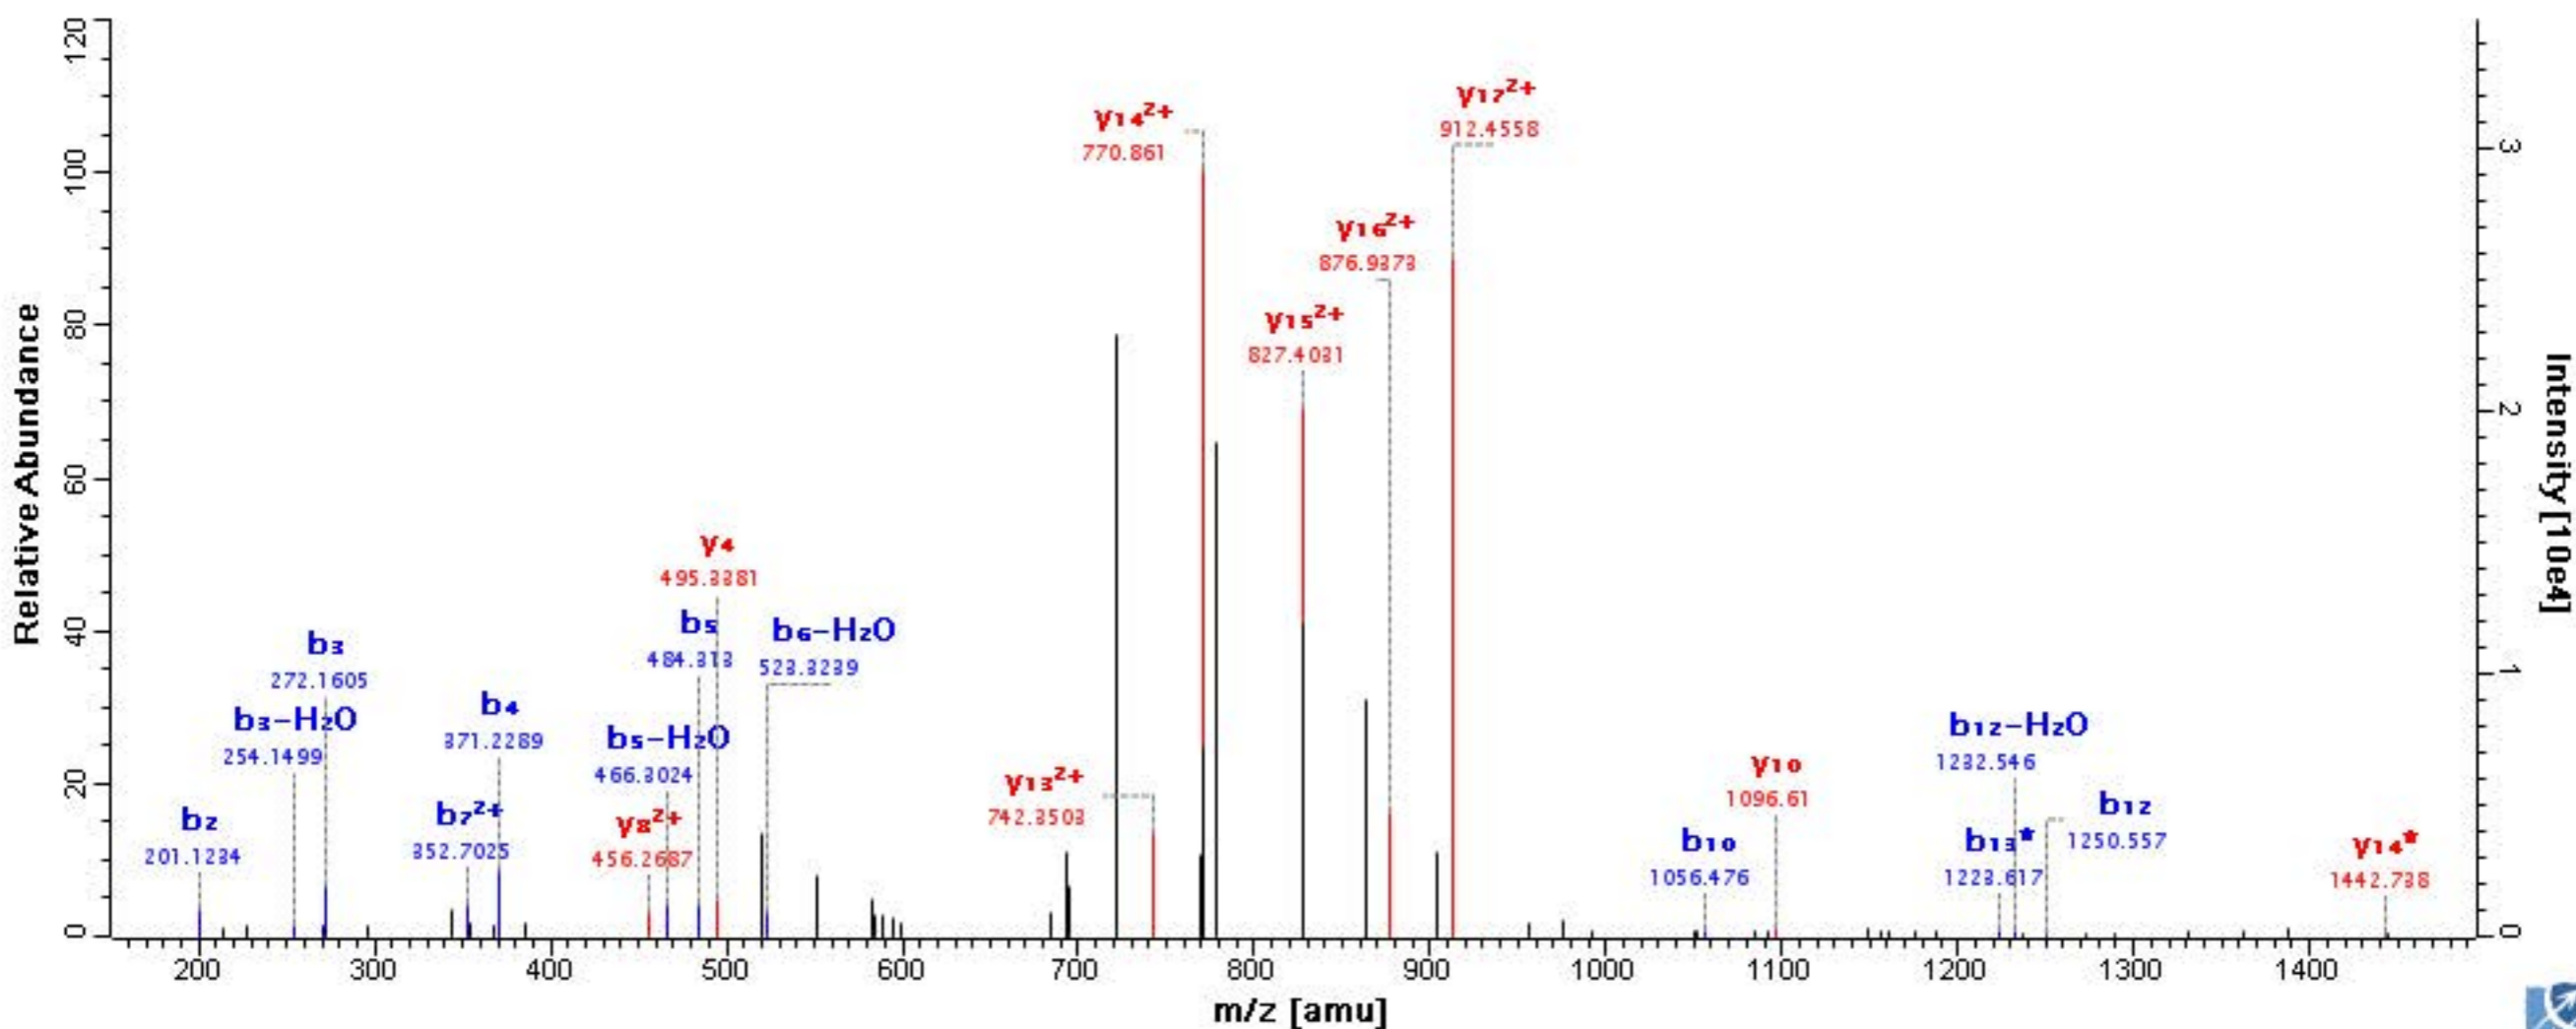

**precursor information**

|                   |                     |
|-------------------|---------------------|
| Mass:             | 2014.9986           |
| m/z:              | System.Collections. |
| Charge:           | System.Collections. |
| Retentiontime:    | System.Collections. |
| Score:            | 79.3463             |
| Mass Error [ppm]: | -0.18535            |
| PEP:              | 9.3664E-05          |
| Precursor Type:   | MULTI               |

| b <sup>2+</sup> ion |          | b ion     |          | seq |   | y ion    |          | y <sup>2+</sup> ion |                    |
|---------------------|----------|-----------|----------|-----|---|----------|----------|---------------------|--------------------|
| Δ dalton            | mass     | Δ dalton  | mass     |     |   | Δ dalton | mass     | Δ dalton            | mass               |
|                     | 102.055  |           | 102.055  | 1   | T | 18       |          |                     |                    |
|                     | 201.1234 | +0.041029 | 201.1234 | 2   | V | 17       | 1922.973 |                     | 1922.973           |
|                     | 272.1605 | +0.15632  | 272.1605 | 3   | A | 16       | 1823.904 |                     | 912.4558 +0.198175 |
|                     | 371.2289 | -0.041152 | 371.2289 | 4   | V | 15       | 1752.867 |                     | 876.9373 +0.020565 |
|                     | 484.313  | +0.049405 | 484.313  | 5   | I | 14       | 1653.799 |                     | 827.4031 +0.073754 |
|                     | 541.3344 |           | 541.3344 | 6   | G | 13       | 1540.715 |                     | 770.861 +0.091433  |
| +0.455139           | 352.7025 |           | 704.3978 | 7   | Y | 12       | 1483.693 |                     | 742.3503 -0.212045 |
|                     | 761.4192 |           | 761.4192 | 8   | G | 11       | 1320.63  |                     | 1320.63            |
|                     | 928.4176 |           | 928.4176 | 9   | S | 10       | 1263.609 |                     | 1263.609           |
|                     | 1056.476 | -0.184771 | 1056.476 | 10  | Q | 9        | 1096.61  | +0.142901           | 1096.61            |
|                     | 1113.498 |           | 1113.498 | 11  | G | 8        | 968.5516 |                     | 968.5516           |
|                     | 1250.557 | +0.098623 | 1250.557 | 12  | H | 7        | 911.5301 |                     | 456.2687 +0.085128 |
|                     | 1321.594 |           | 1321.594 | 13  | A | 6        | 774.4712 |                     | 774.4712           |
|                     | 1458.653 |           | 1458.653 | 14  | H | 5        | 703.4341 |                     | 703.4341           |
|                     | 1529.69  |           | 1529.69  | 15  | A | 4        | 566.3752 |                     | 566.3752           |
|                     | 1642.774 |           | 1642.774 | 16  | I | 3        | 495.3381 | -0.006943           | 495.3381           |
|                     | 1756.817 |           | 1756.817 | 17  | N | 2        | 382.254  |                     | 382.254            |
|                     | 1869.901 |           | 1869.901 | 18  | I | 1        | 268.2111 |                     | 268.2111           |
|                     |          |           |          | 19  | K | 0        | 155.127  |                     | 155.127            |

**general information**

|                       |           |
|-----------------------|-----------|
| Annotation:           | 11 of 19  |
| AminoAcids Coverag    | 58 %      |
| Intensity Coverage:   | 48 %      |
| Protein Localisation: | 19 ... 37 |

Source: 20120514\_VR\_Bsu\_TriplesILACrep1\_pL2ESLS\_F07  
 Scannumber: 8478  
 Protein: BSU13010; ykgB  
 Peptide Score: 85.97  
 Method: ITMS; CID; 3

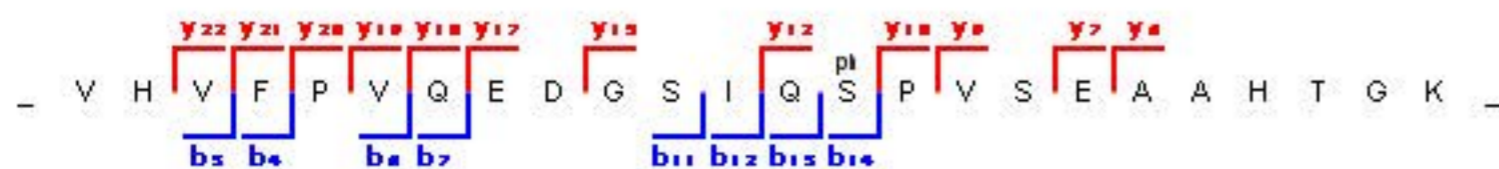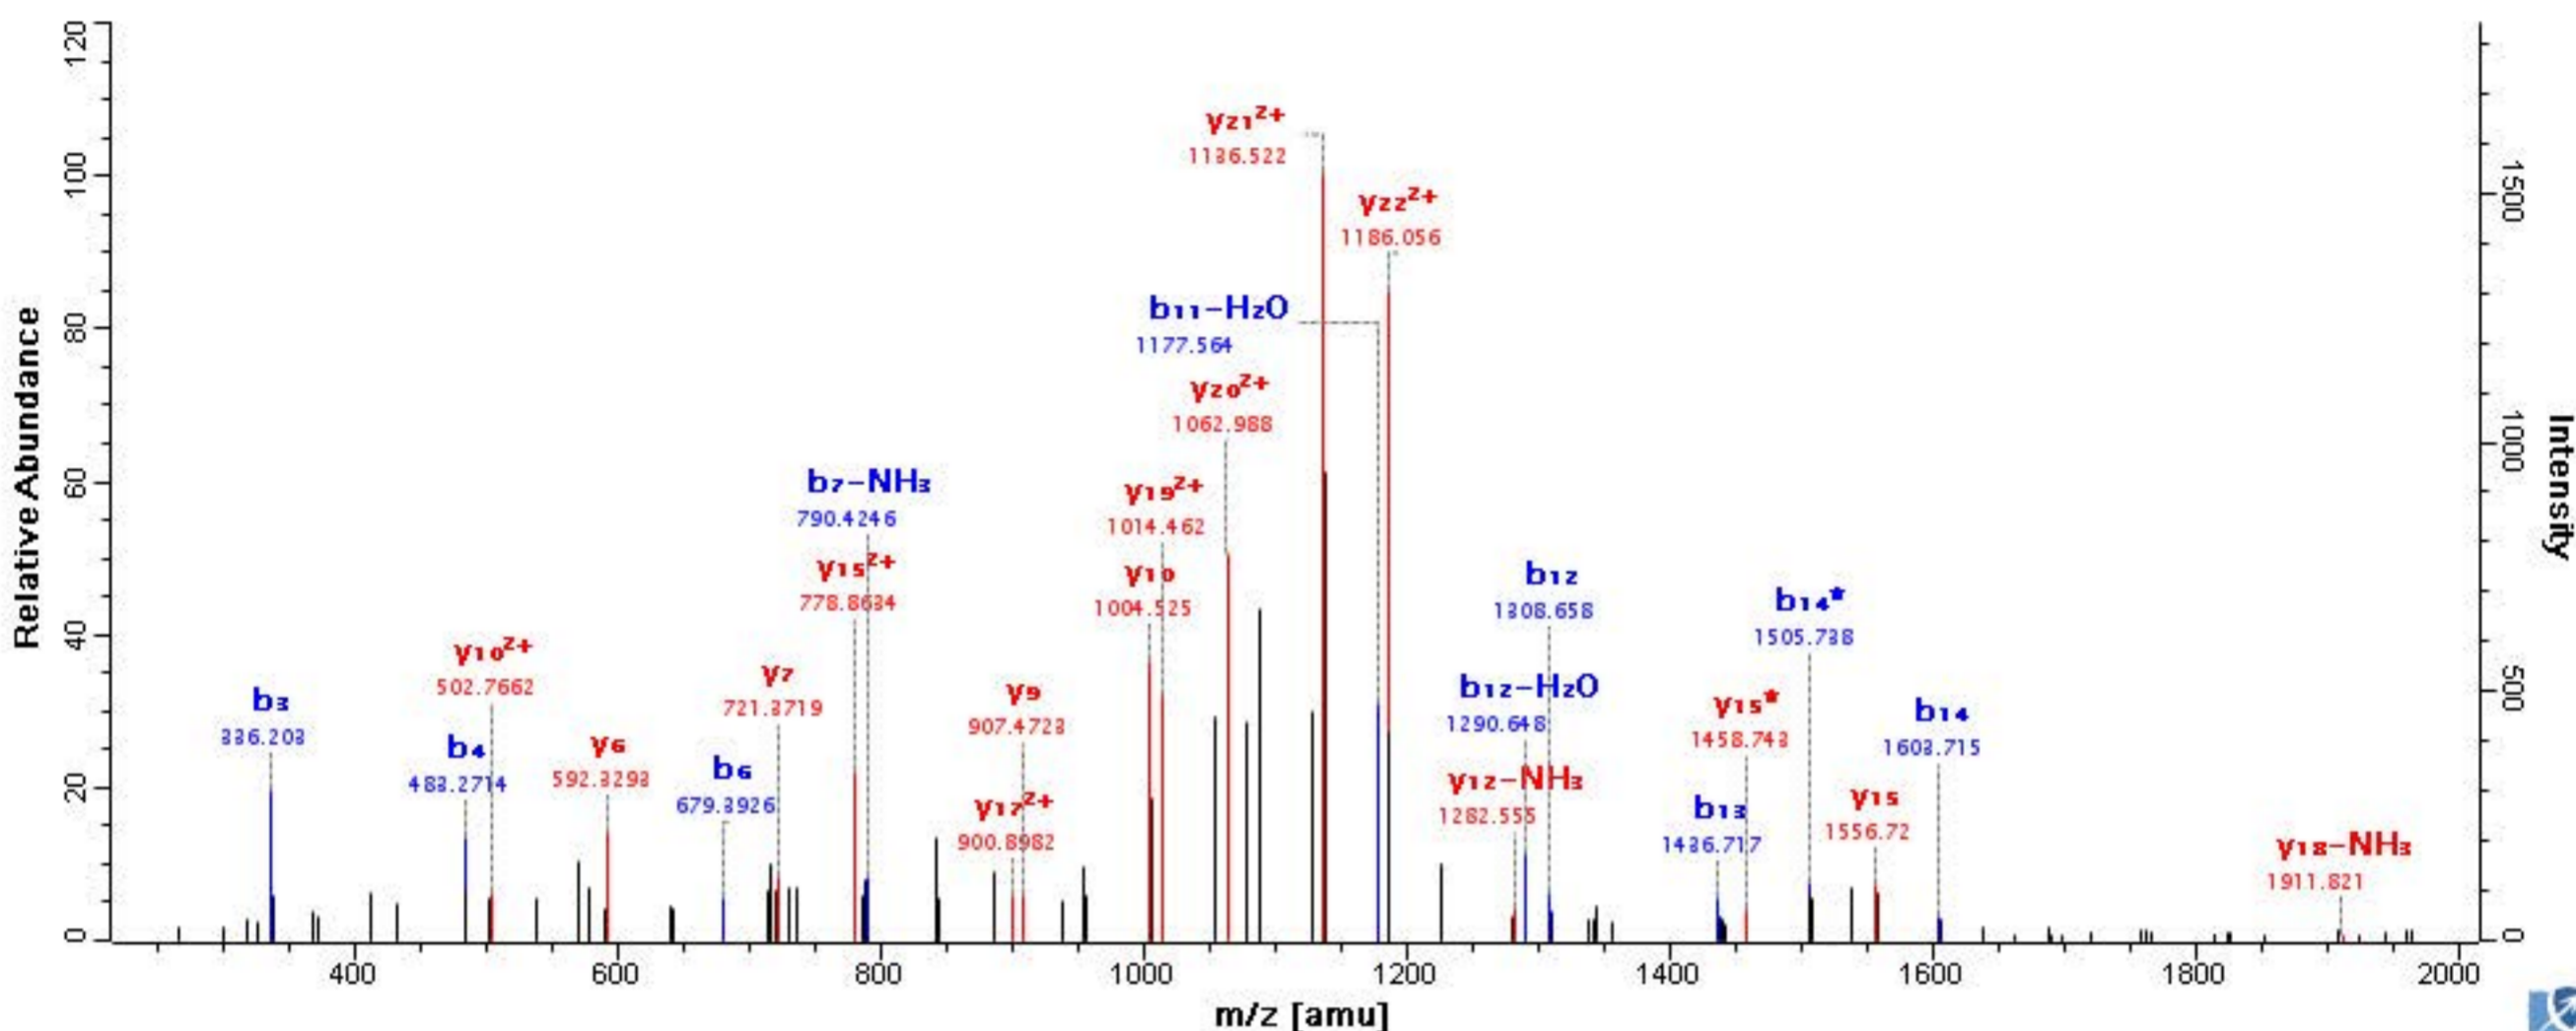

#### precursor information

|                   |                     |
|-------------------|---------------------|
| Mass:             | 2606.22626          |
| m/z:              | System.Collections. |
| Charge:           | System.Collections. |
| Retentiontime:    | System.Collections. |
| Score:            | 85.97375            |
| Mass Error [ppm]: | 0.19689             |
| PEP:              | 2.0642E-06          |
| Precursor Type:   | ISO                 |

| b ion      |              |    |     |    | y ion        |            | y <sup>2+</sup> ion |            |
|------------|--------------|----|-----|----|--------------|------------|---------------------|------------|
| Δ dalton   | mass         |    | seq |    | Δ dalton     | mass       | Δ dalton            | mass       |
|            | 100.07569038 | 1  | V   | 23 |              |            |                     |            |
|            | 237.13460225 | 2  | H   | 22 | 2508.1646074 |            | 2508.1646074        |            |
| +0.0818044 | 336.20301616 | 3  | V   | 21 | 2371.1056956 |            | 1186.056486         | +0.2070638 |
| +0.1204767 | 483.27143008 | 4  | F   | 20 | 2272.0372817 |            | 1136.5222791        | +0.42401   |
|            | 580.32419393 | 5  | P   | 19 | 2124.9688677 |            | 1062.9880721        | +0.3112443 |
| -0.137664  | 679.39260785 | 6  | V   | 18 | 2027.9161039 |            | 1014.4616902        | +0.2958782 |
|            | 807.45118536 | 7  | Q   | 17 | 1928.84769   |            | 1928.84769          |            |
|            | 936.49377845 | 8  | E   | 16 | 1800.7891125 |            | 900.89819447        | -0.0129406 |
|            | 1051.5207215 | 9  | D   | 15 | 1671.7465194 |            | 1671.7465194        |            |
|            | 1108.5421852 | 10 | G   | 14 | 1556.7195763 | +0.2195106 | 778.8634264         | +0.2704237 |
|            | 1195.5742136 | 11 | S   | 13 | 1499.6981126 |            | 1499.6981126        |            |
| -0.0086194 | 1308.6582776 | 12 | I   | 12 | 1412.6660842 |            | 1412.6660842        |            |
| +0.0984525 | 1436.7168551 | 13 | Q   | 11 | 1299.5820202 |            | 1299.5820202        |            |
| +0.3290976 | 1603.7152139 | 14 | S   | 10 | 1171.5234427 |            | 1171.5234427        |            |
|            | 1700.7679778 | 15 | P   | 9  | 1004.5250839 | +0.1280533 | 502.76618018        | -0.0330259 |
|            | 1799.8363917 | 16 | V   | 8  | 907.47232004 | +0.1594549 | 907.47232004        |            |
|            | 1886.8684201 | 17 | S   | 7  | 808.40390613 |            | 808.40390613        |            |
|            | 2015.9110132 | 18 | E   | 6  | 721.37187772 | -0.0483304 | 721.37187772        |            |
|            | 2086.948127  | 19 | A   | 5  | 592.32928462 | -0.0151367 | 592.32928462        |            |
|            | 2157.9852408 | 20 | A   | 4  | 521.29217083 |            | 521.29217083        |            |
|            | 2295.0441526 | 21 | H   | 3  | 450.25505704 |            | 450.25505704        |            |
|            | 2396.0918311 | 22 | T   | 2  | 313.19614518 |            | 313.19614518        |            |
|            | 2453.1132948 | 23 | G   | 1  | 212.14846671 |            | 212.14846671        |            |
|            |              | 24 | K   | 0  | 155.12700298 |            | 155.12700298        |            |

#### general information

|                       |             |
|-----------------------|-------------|
| Annotation:           | 15 of 24    |
| AminoAcids Coverag    | 62 %        |
| Intensity Coverage:   | 46 %        |
| Protein Localisation: | 114 ... 137 |

Source: 20120514\_VR\_Bsu\_TripleSILACrep1\_pL2ESLS\_F09  
 Scannumber: 2089  
 Protein: BSU31110; yubF  
 Peptide Score: 114.97  
 Method: ITMS; CID; 3

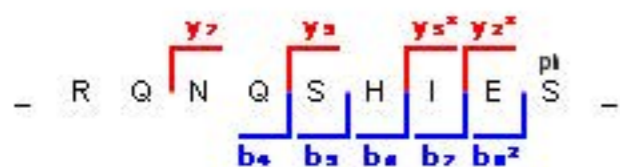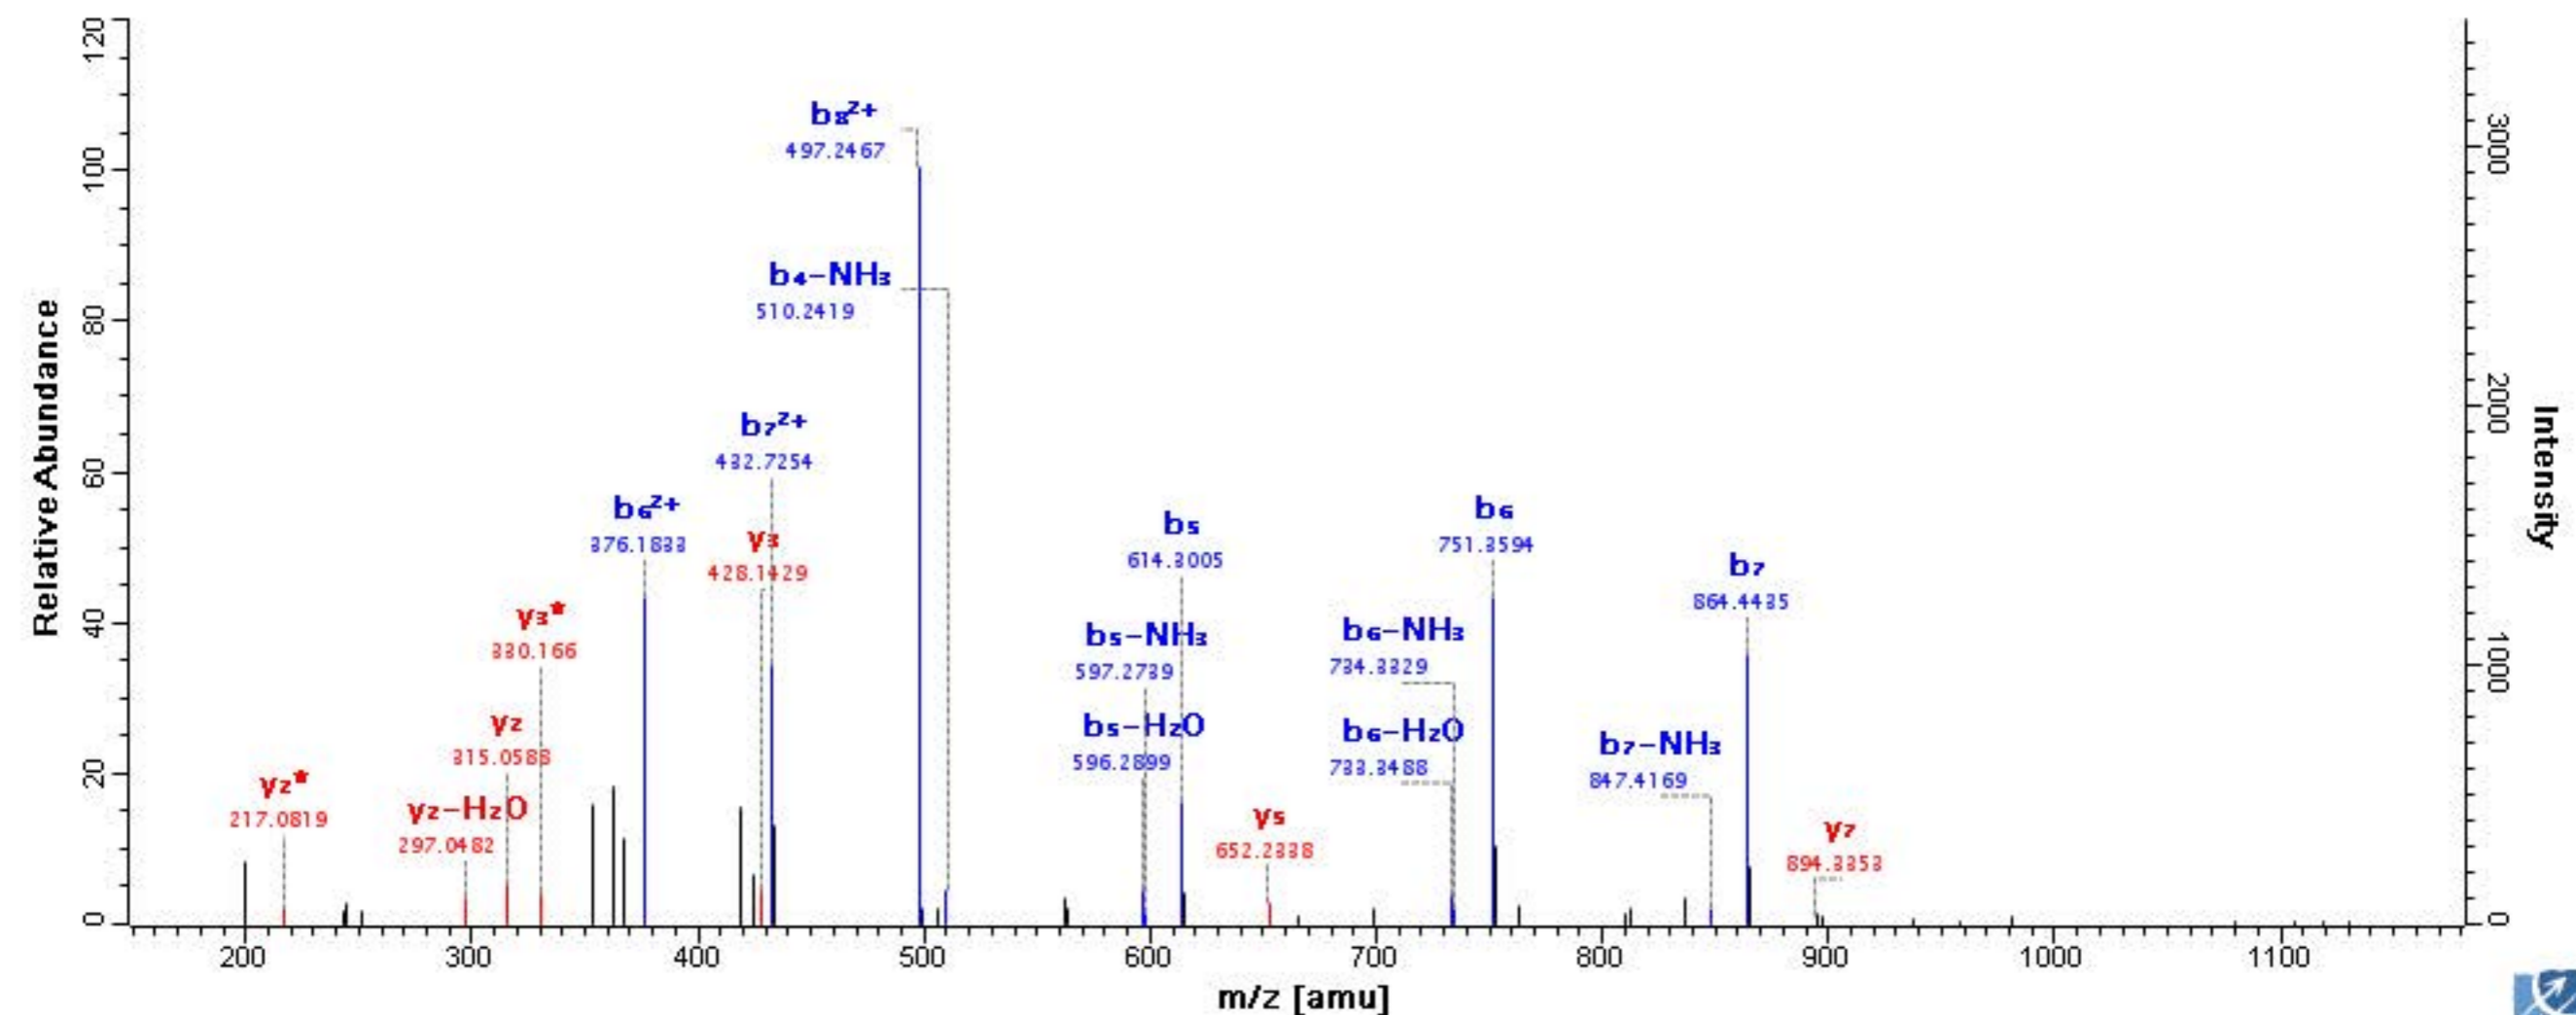

#### precursor information

|                       |                     |
|-----------------------|---------------------|
| Mass:                 | 1177.4875           |
| m/z:                  | System.Collections. |
| Charge:               | System.Collections. |
| Retentiontime:        | System.Collections. |
| Score:                | 114.9683            |
| Mass Error [ppm]:     | -0.18127            |
| PEP:                  | 4.2569E-05          |
| g Precursor Type:     | ISO                 |
| Annotation:           | 6 of 9              |
| AminoAcids Coverag    | 67 %                |
| Intensity Coverage:   | 68 %                |
| Protein Localisation: | 79 ... 87           |

| b <sup>2+</sup> ion |              | b ion      |              |     | y ion |          |                         |
|---------------------|--------------|------------|--------------|-----|-------|----------|-------------------------|
| Δ dalton            | mass         | Δ dalton   | mass         | seq |       | Δ dalton | mass                    |
|                     | 157.10838749 |            | 157.10838749 | 1   | R     | 8        |                         |
|                     | 285.16696501 |            | 285.16696501 | 2   | Q     | 7        | 1022.3938798            |
|                     | 399.20989245 |            | 399.20989245 | 3   | N     | 6        | 894.33530228 +0.3656255 |
|                     | 527.26846996 |            | 527.26846996 | 4   | Q     | 5        | 780.29237483            |
|                     | 614.30049837 | +0.0806662 | 614.30049837 | 5   | S     | 4        | 652.23379732 +0.2206094 |
| +0.0709901          | 376.18334335 | +0.0099135 | 751.35941024 | 6   | H     | 3        | 565.20176891            |
| +0.0467804          | 432.72537534 | -0.0005421 | 864.44347422 | 7   | I     | 2        | 428.14285705 -0.0231671 |
| +0.2041948          | 497.24667189 |            | 993.48606731 | 8   | E     | 1        | 315.05879307 +0.1804953 |
|                     |              |            |              | 9   | S     | 0        | 186.01619997            |

Source: 20120514\_VR\_Bsu\_TripleSILACrep1\_pL2ESLS\_F09  
 Scannumber: 2998  
 Protein: BSU15590; sat; ylnB  
 Peptide Score: 160.59  
 Method: ITMS; CID; 3

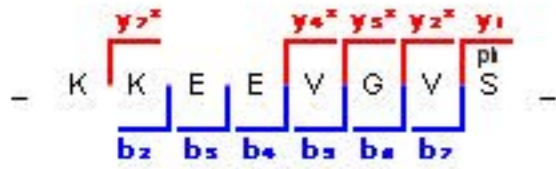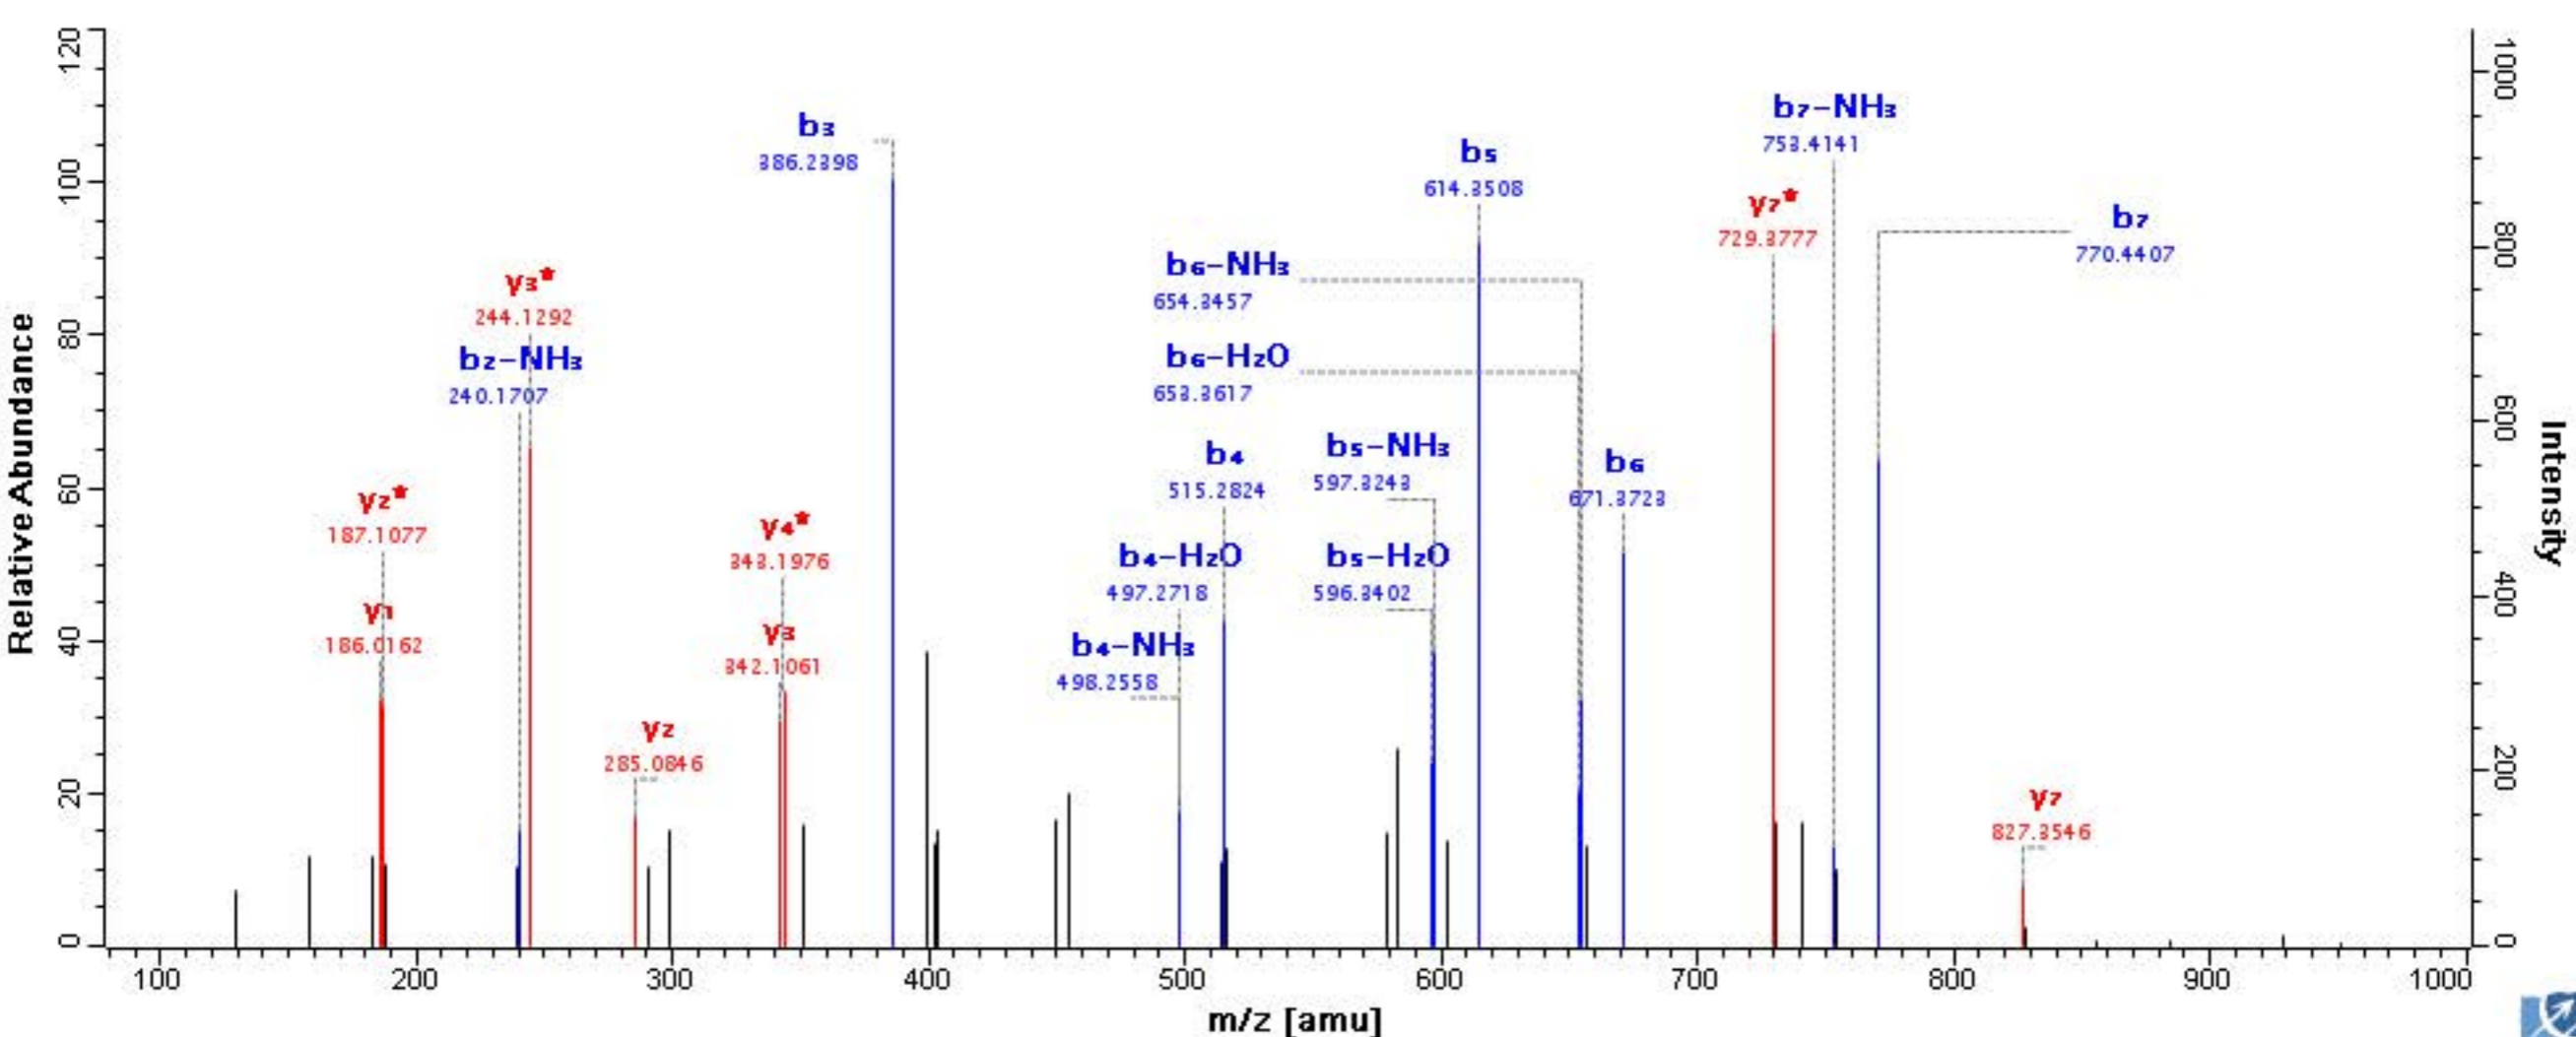

**precursor information**

|                       |                     |
|-----------------------|---------------------|
| Mass:                 | 954.44254           |
| m/z:                  | System.Collections. |
| Charge:               | System.Collections. |
| Retentiontime:        | System.Collections. |
| Score:                | 160.5866            |
| Mass Error [ppm]:     | 0.22069             |
| g PEP:                | 3.3991E-09          |
| Annotation:           | 7 of 8              |
| AminoAcids Coverage:  | 88 %                |
| Intensity Coverage:   | 71 %                |
| Protein Localisation: | 375 ... 382         |

| b ion      |               |   |     | y ion    |               |  |            |
|------------|---------------|---|-----|----------|---------------|--|------------|
| Δ dalton   | mass          |   | seq | Δ dalton | mass          |  |            |
|            | 129.102239484 | 1 | K   | 7        |               |  |            |
|            | 257.197202502 | 2 | K   | 6        | 827.354640737 |  | -0.021816  |
| -0.2085761 | 386.239795598 | 3 | E   | 5        | 699.25967772  |  |            |
| +0.0876064 | 515.282388694 | 4 | E   | 4        | 570.217084623 |  |            |
| +0.0594147 | 614.350802611 | 5 | V   | 3        | 441.174491527 |  |            |
| -0.0203987 | 671.372266334 | 6 | G   | 2        | 342.106077611 |  | +0.0648513 |
| +0.1337216 | 770.44068025  | 7 | V   | 1        | 285.084613887 |  | +0.2324637 |
|            |               | 8 | S   | 0        | 186.016199971 |  | +0.1183215 |

Source: 20120514\_VR\_Bsu\_TripleSILACrep1\_pL2ESLS\_F09  
 Scannumber: 3037  
 Protein: BSU34360; yveL  
 Peptide Score: 153.67  
 Method: ITMS; CID; 3

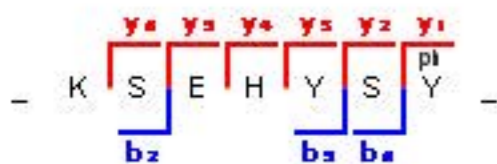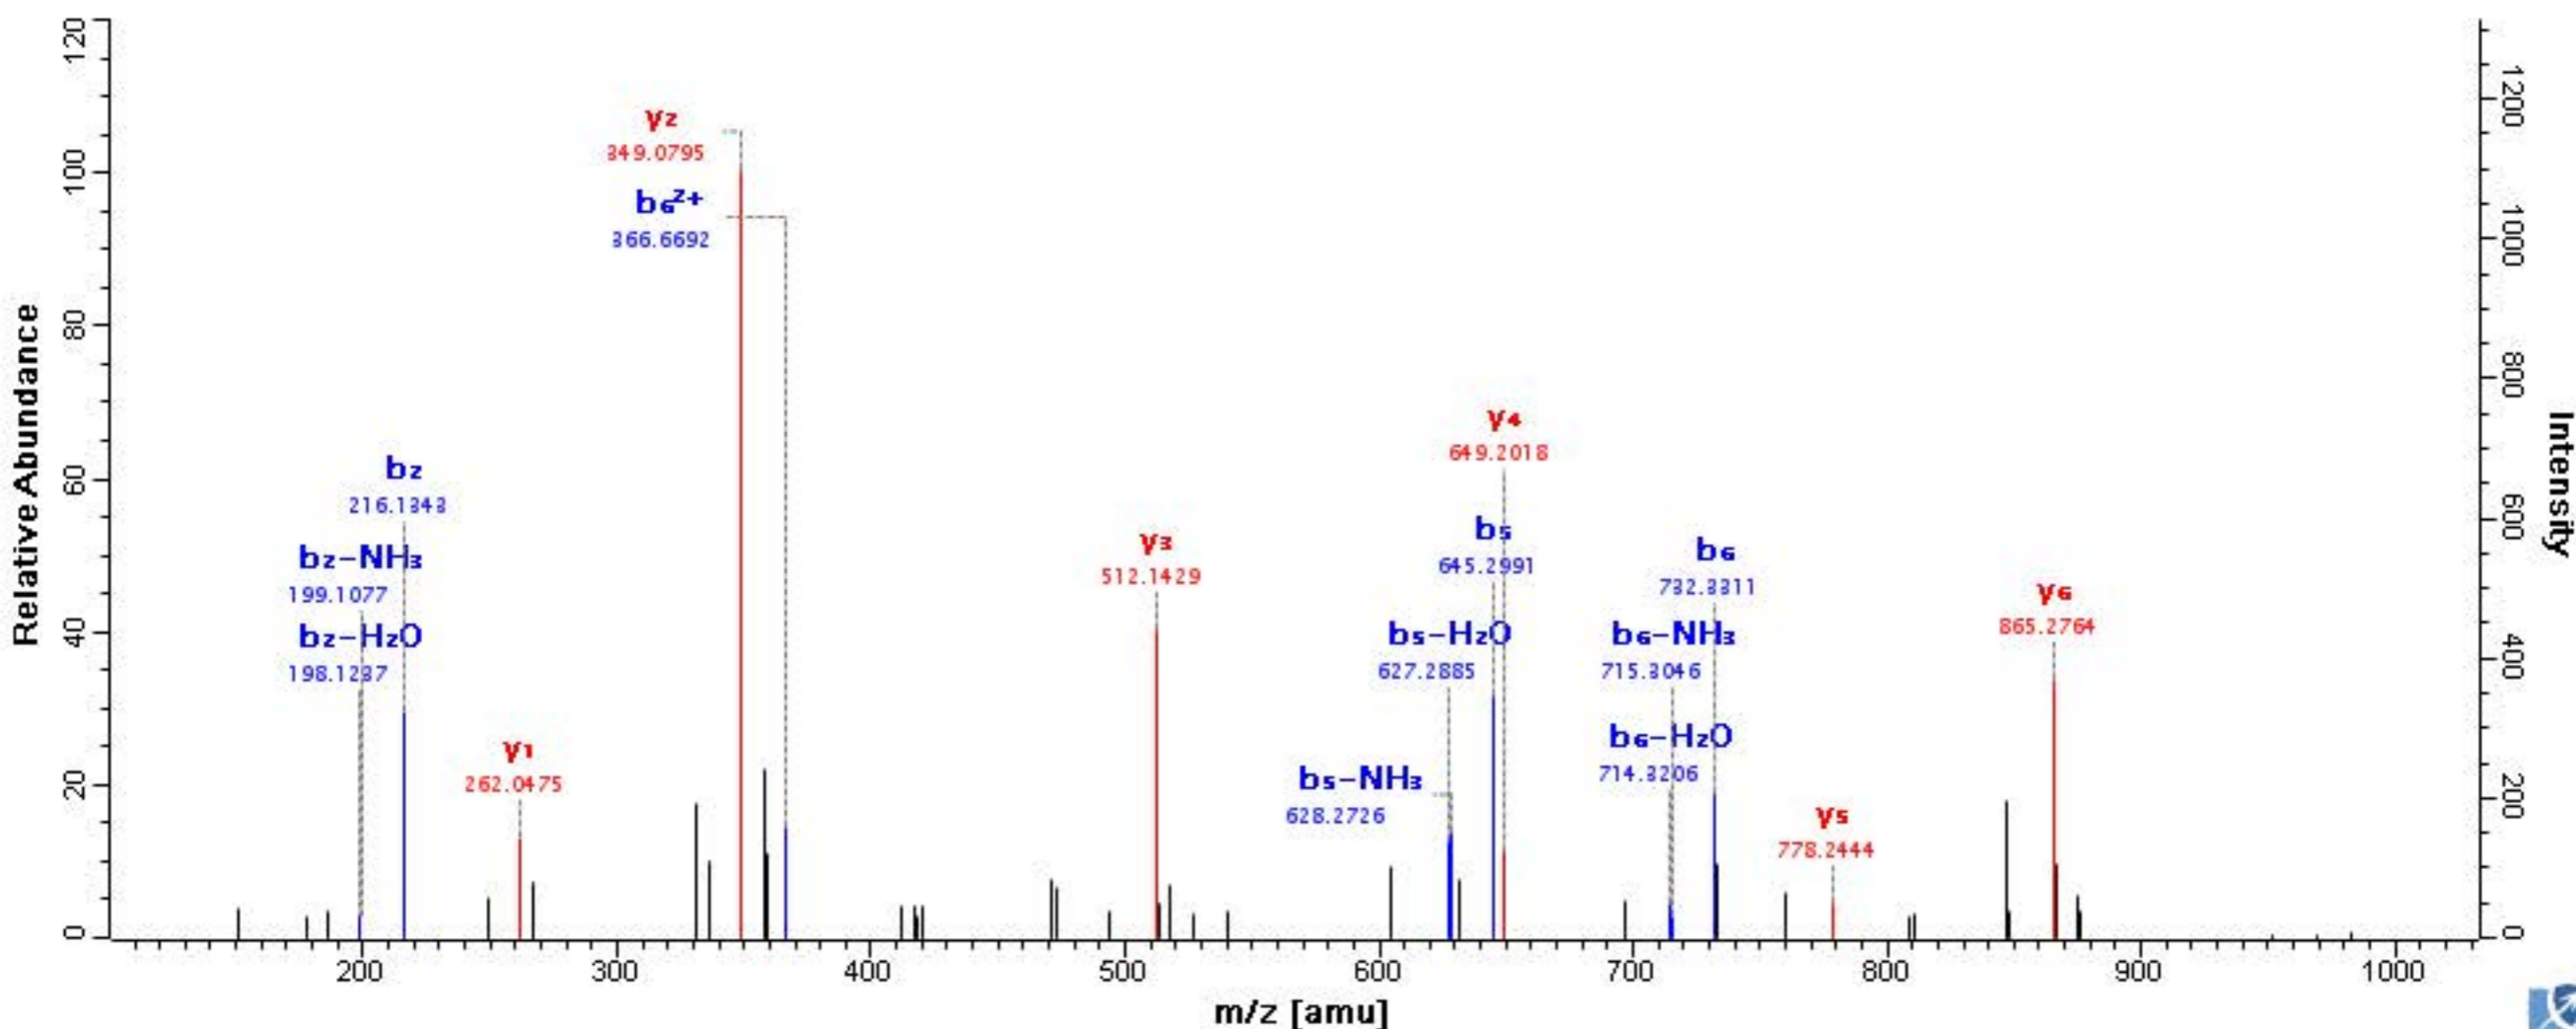

**precursor information**

|                       |                     |
|-----------------------|---------------------|
| Mass:                 | 992.36453           |
| m/z:                  | System.Collections. |
| Charge:               | System.Collections. |
| Retentiontime:        | System.Collections. |
| Score:                | 153.6721            |
| Mass Error [ppm]:     | 0.45253             |
| g PFP:                | 3.9095E-09          |
| Annotation:           | 6 of 7              |
| AminoAcids Coverage:  | 86 %                |
| Intensity Coverage:   | 61 %                |
| Protein Localisation: | 221 ... 227         |

| b <sup>2+</sup> ion |              | b ion      |              |     | y ion |          |                         |
|---------------------|--------------|------------|--------------|-----|-------|----------|-------------------------|
| Δ dalton            | mass         | Δ dalton   | mass         | seq |       | Δ dalton | mass                    |
|                     | 129.10223948 |            | 129.10223948 | 1   | K     | 6        |                         |
|                     | 216.13426789 | -0.0097562 | 216.13426789 | 2   | S     | 5        | 865.27639042 +0.0849377 |
|                     | 345.17686099 |            | 345.17686099 | 3   | E     | 4        | 778.24436201 +0.1682967 |
|                     | 482.23577285 |            | 482.23577285 | 4   | H     | 3        | 649.20176891 -0.0342884 |
|                     | 645.29910139 | +0.0354323 | 645.29910139 | 5   | Y     | 2        | 512.14285705 +0.0443378 |
| +0.047197           | 366.66920313 | +0.038316  | 732.3311298  | 6   | S     | 1        | 349.07952851 +0.0704959 |
|                     |              |            |              | 7   | Y     | 0        | 262.0475001 +0.0147863  |



Source: 201 20514\_VR\_Bsu\_TripleSILACrep1\_pL2ESLS\_F09  
 Scannumber: 8418  
 Protein: BSU12410; yjoA  
 Peptide Score: 85.51  
 Method: ITMS; CID; 3

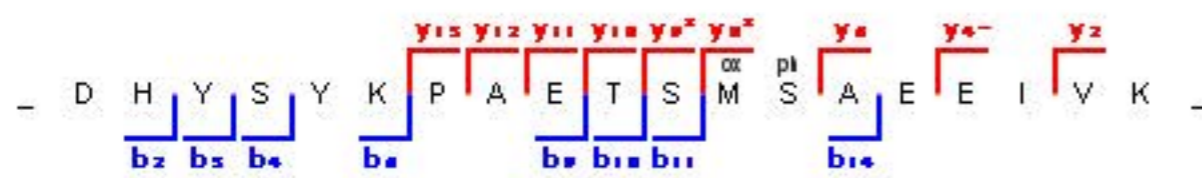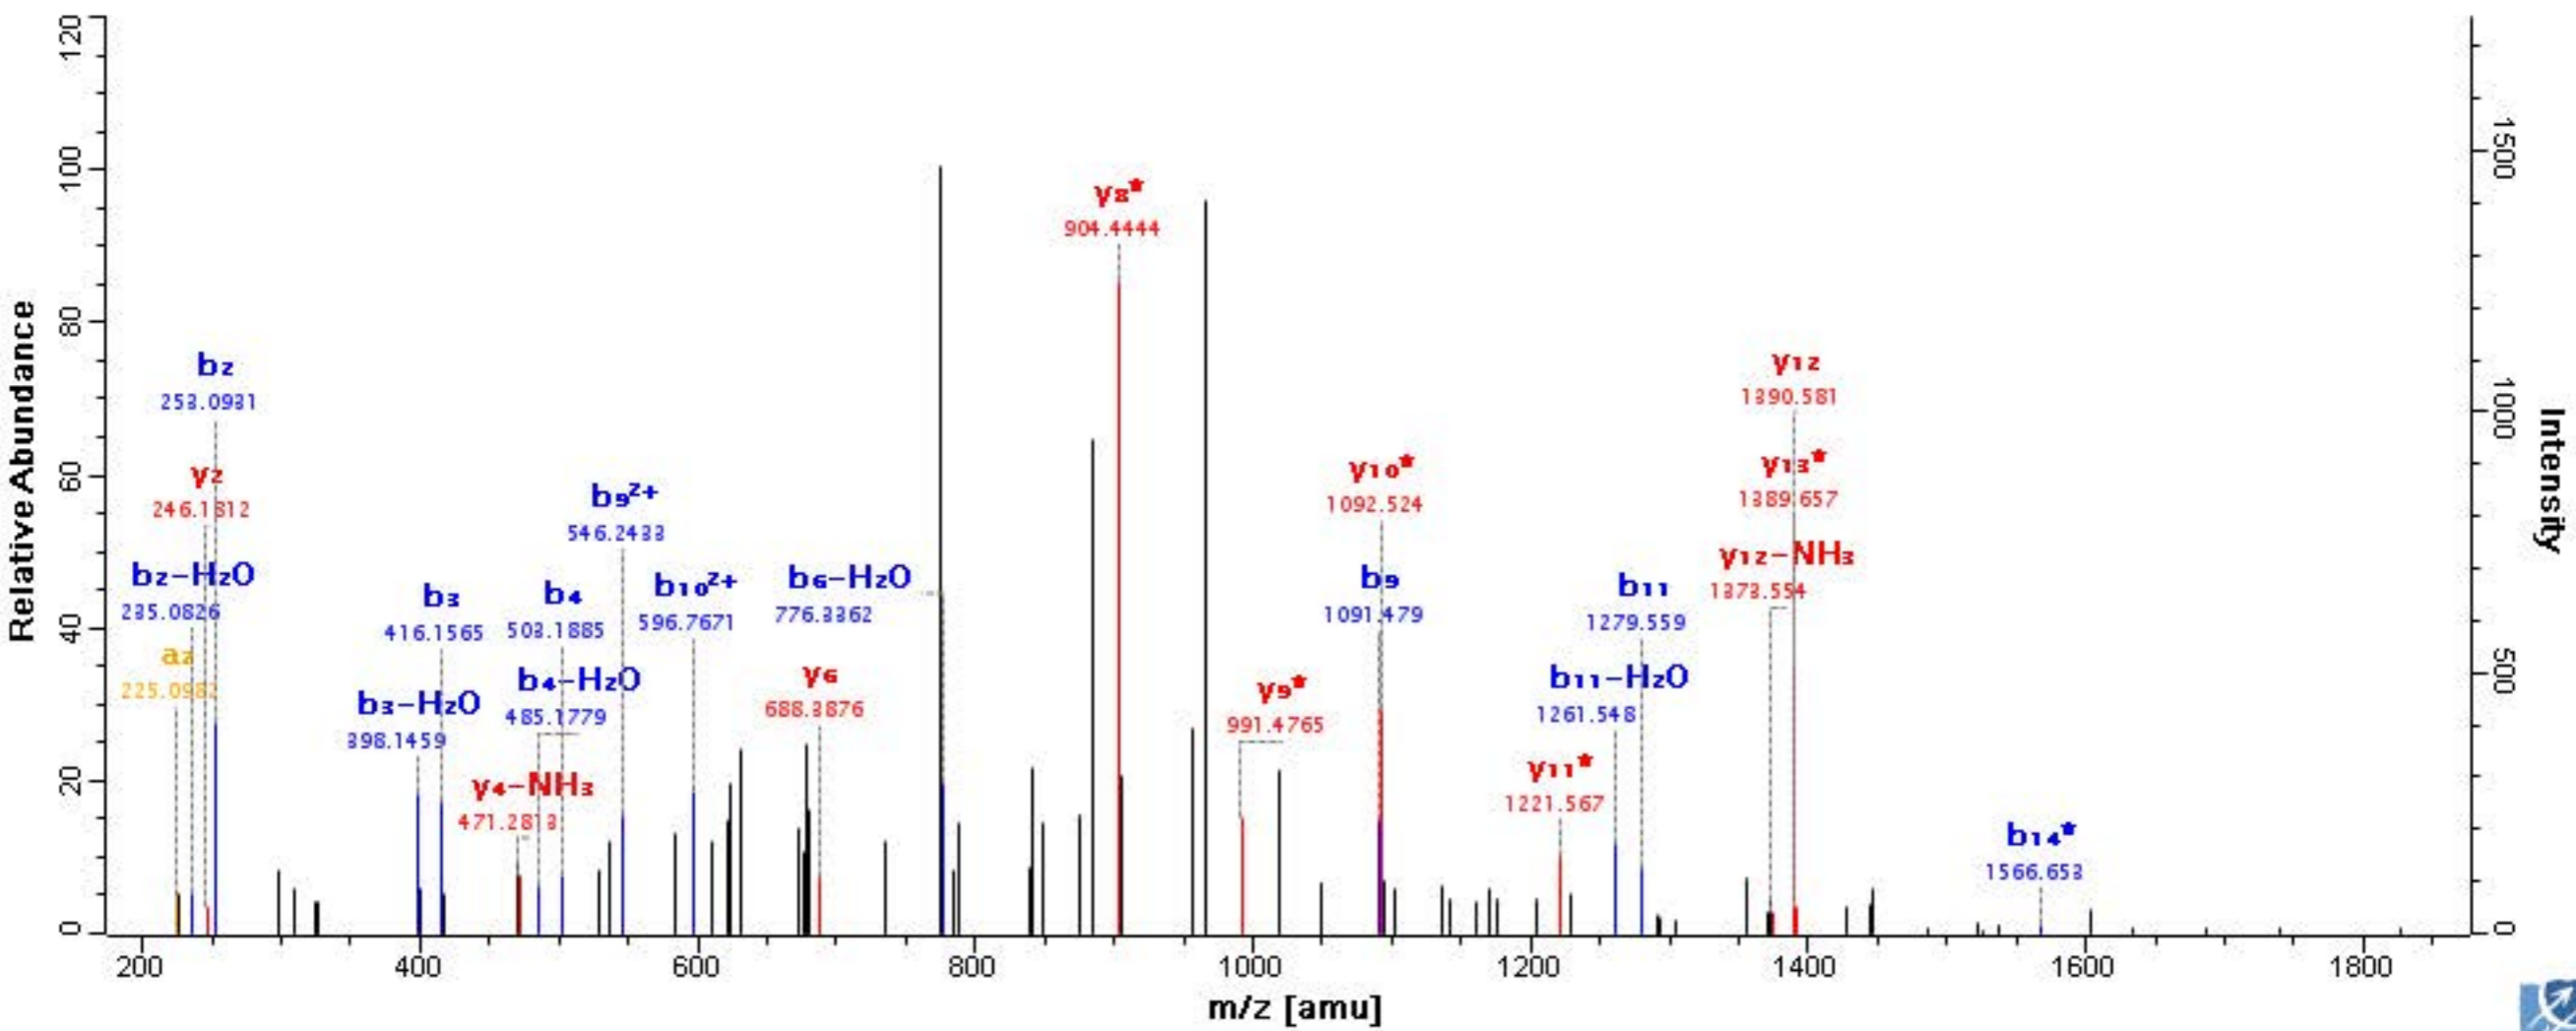

**precursor information**

|                   |                     |
|-------------------|---------------------|
| Mass:             | 2279.96542          |
| m/z:              | System.Collections. |
| Charge:           | System.Collections. |
| Retentiontime:    | System.Collections. |
| Score:            | 85.50999            |
| Mass Error [ppm]: | -0.14137            |
| PEP:              | 0.00010125          |
| Precursor Type:   | MULTI               |

| a ion    |          | b <sup>2+</sup> ion |          | b ion     |          | y ion |          |      |
|----------|----------|---------------------|----------|-----------|----------|-------|----------|------|
| Δ dalton | mass     | Δ dalton            | mass     | Δ dalton  | mass     | seq   | Δ dalton | mass |
|          | 88.0393  |                     | 116.0342 |           | 116.0342 | 1     | D        | 18   |
| +0.17255 | 225.0982 |                     | 253.0931 | +0.117531 | 253.0931 | 2     | H        | 17   |
|          | 388.1615 |                     | 416.1565 | +0.256016 | 416.1565 | 3     | Y        | 16   |
|          | 475.1936 |                     | 503.1885 | -0.129284 | 503.1885 | 4     | S        | 15   |
|          | 638.2569 |                     | 666.2518 |           | 666.2518 | 5     | Y        | 14   |
|          | 766.3519 |                     | 794.3468 |           | 794.3468 | 6     | K        | 13   |
|          | 863.4046 |                     | 891.3995 |           | 891.3995 | 7     | P        | 12   |
|          | 934.4417 |                     | 962.4367 |           | 962.4367 | 8     | A        | 11   |
|          | 1063.484 | +0.124839           | 546.2433 | +0.084104 | 1091.479 | 9     | E        | 10   |
|          | 1164.532 | +0.453539           | 596.7671 |           | 1192.527 | 10    | T        | 9    |
|          | 1251.564 |                     | 1279.559 | +0.211428 | 1279.559 | 11    | S        | 8    |
|          | 1398.599 |                     | 1426.594 |           | 1426.594 | 12    | M        | 7    |
|          | 1565.598 |                     | 1593.593 |           | 1593.593 | 13    | S        | 6    |
|          | 1636.635 |                     | 1664.63  |           | 1664.63  | 14    | A        | 5    |
|          | 1765.678 |                     | 1793.672 |           | 1793.672 | 15    | E        | 4    |
|          | 1894.72  |                     | 1922.715 |           | 1922.715 | 16    | E        | 3    |
|          | 2007.804 |                     | 2035.799 |           | 2035.799 | 17    | I        | 2    |
|          | 2106.873 |                     | 2134.867 |           | 2134.867 | 18    | V        | 1    |
|          |          |                     |          |           |          | 19    | K        | 0    |

**general information**

|                       |           |
|-----------------------|-----------|
| Annotation:           | 13 of 19  |
| AminoAcids Coverag    | 68 %      |
| Intensity Coverage:   | 32 %      |
| Protein Localisation: | 28 ... 46 |

Source: 20120514\_VR\_Bsu\_TripleSILACrep1\_pL2ESLS\_F13  
 Scannumber: 2224  
 Protein: BSU04550; ydbP  
 Peptide Score: 102.52  
 Method: ITMS; CID; 3

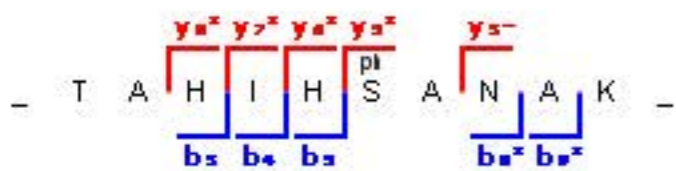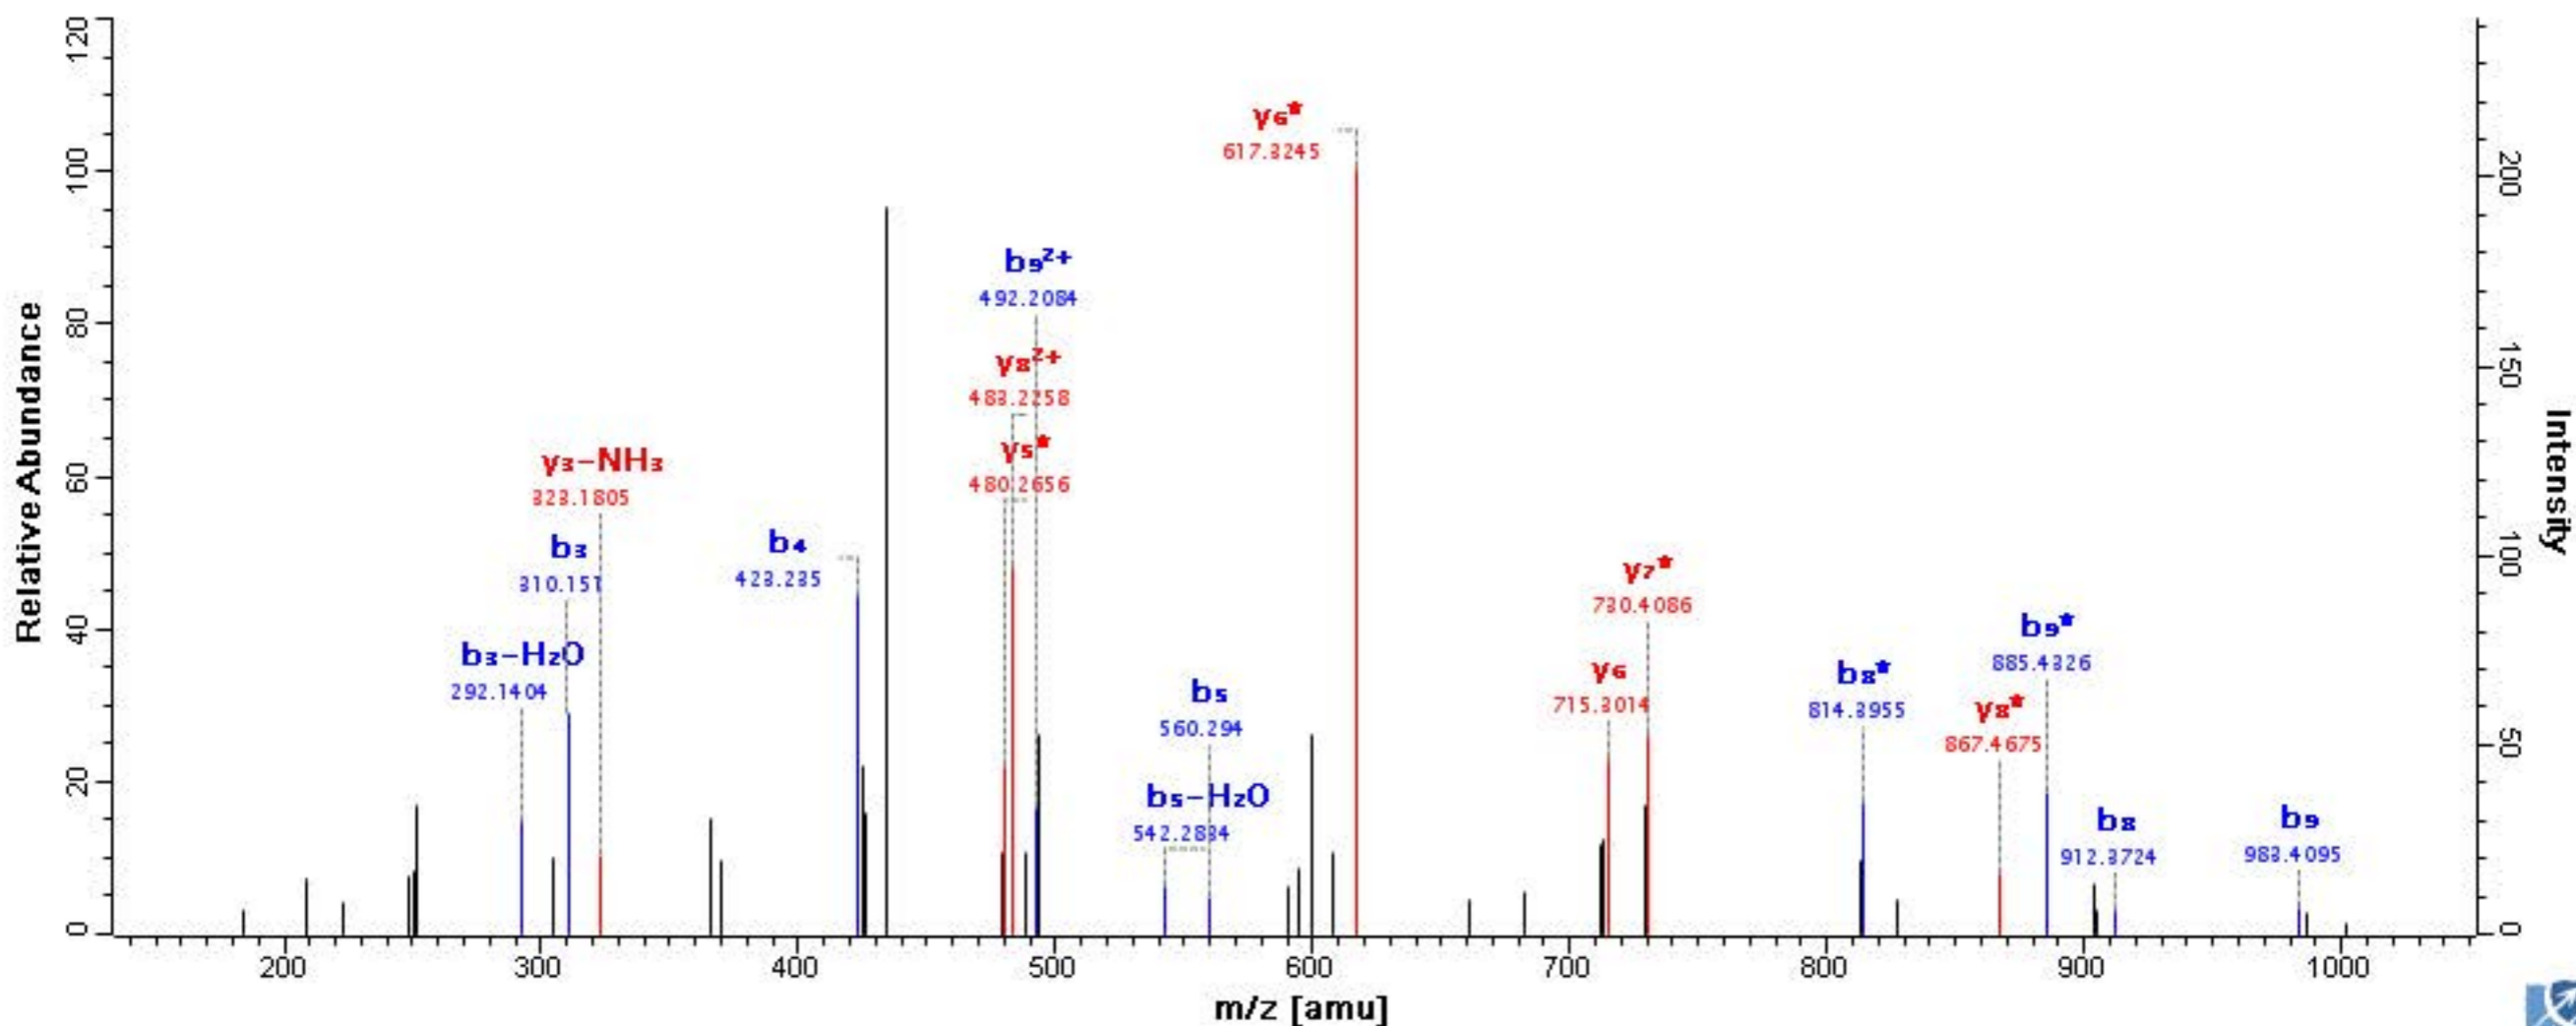

#### precursor information

|                   |                     |
|-------------------|---------------------|
| Mass:             | 1128.50768          |
| m/z:              | System.Collections. |
| Charge:           | System.Collections. |
| Retentiontime:    | System.Collections. |
| Score:            | 102.5236            |
| Mass Error [ppm]: | -0.040117           |
| PEP:              | 0.002692            |
| Precursor Type:   | MULTI               |

#### general information

|                       |           |
|-----------------------|-----------|
| Annotation:           | 6 of 10   |
| AminoAcids Coverage:  | 60 %      |
| Intensity Coverage:   | 50 %      |
| Protein Localisation: | 83 ... 92 |

| b <sup>2+</sup> ion |          | b ion     |          |    | seq |   | γ ion    |           | γ <sup>2+</sup> ion |           |
|---------------------|----------|-----------|----------|----|-----|---|----------|-----------|---------------------|-----------|
| Δ dalton            | mass     | Δ dalton  | mass     |    |     |   | Δ dalton | mass      | Δ dalton            | mass      |
|                     | 102.055  |           | 102.055  | 1  | T   | 9 |          |           |                     |           |
|                     | 173.0921 |           | 173.0921 | 2  | A   | 8 | 1036.482 |           | 1036.482            |           |
|                     | 310.151  | +0.139181 | 310.151  | 3  | H   | 7 | 965.4444 |           | 483.2258            | +0.157155 |
|                     | 423.235  | -0.133421 | 423.235  | 4  | I   | 6 | 828.3855 |           | 828.3855            |           |
|                     | 560.294  | +0.023121 | 560.294  | 5  | H   | 5 | 715.3014 | +0.008325 | 715.3014            |           |
|                     | 727.2923 |           | 727.2923 | 6  | S   | 4 | 578.2425 |           | 578.2425            |           |
|                     | 798.3294 |           | 798.3294 | 7  | A   | 3 | 411.2442 |           | 411.2442            |           |
|                     | 912.3724 | +0.163288 | 912.3724 | 8  | N   | 2 | 340.207  |           | 340.207             |           |
| +0.237733           | 492.2084 | +0.155959 | 983.4095 | 9  | A   | 1 | 226.1641 |           | 226.1641            |           |
|                     |          |           |          | 10 | K   | 0 | 155.127  |           | 155.127             |           |

Source: 20120514\_VR\_Bsu\_TripleSILACrep1\_pL2ESLS\_F16  
 Scannumber: 4178  
 Protein: BSU25020; sodA; yqqD  
 Peptide Score: 204.17  
 Method: ITMS; CID; 3

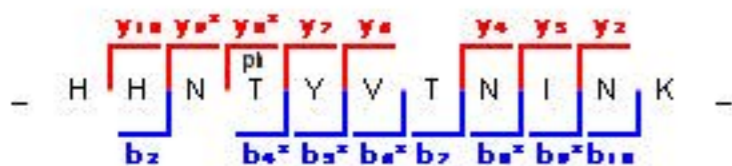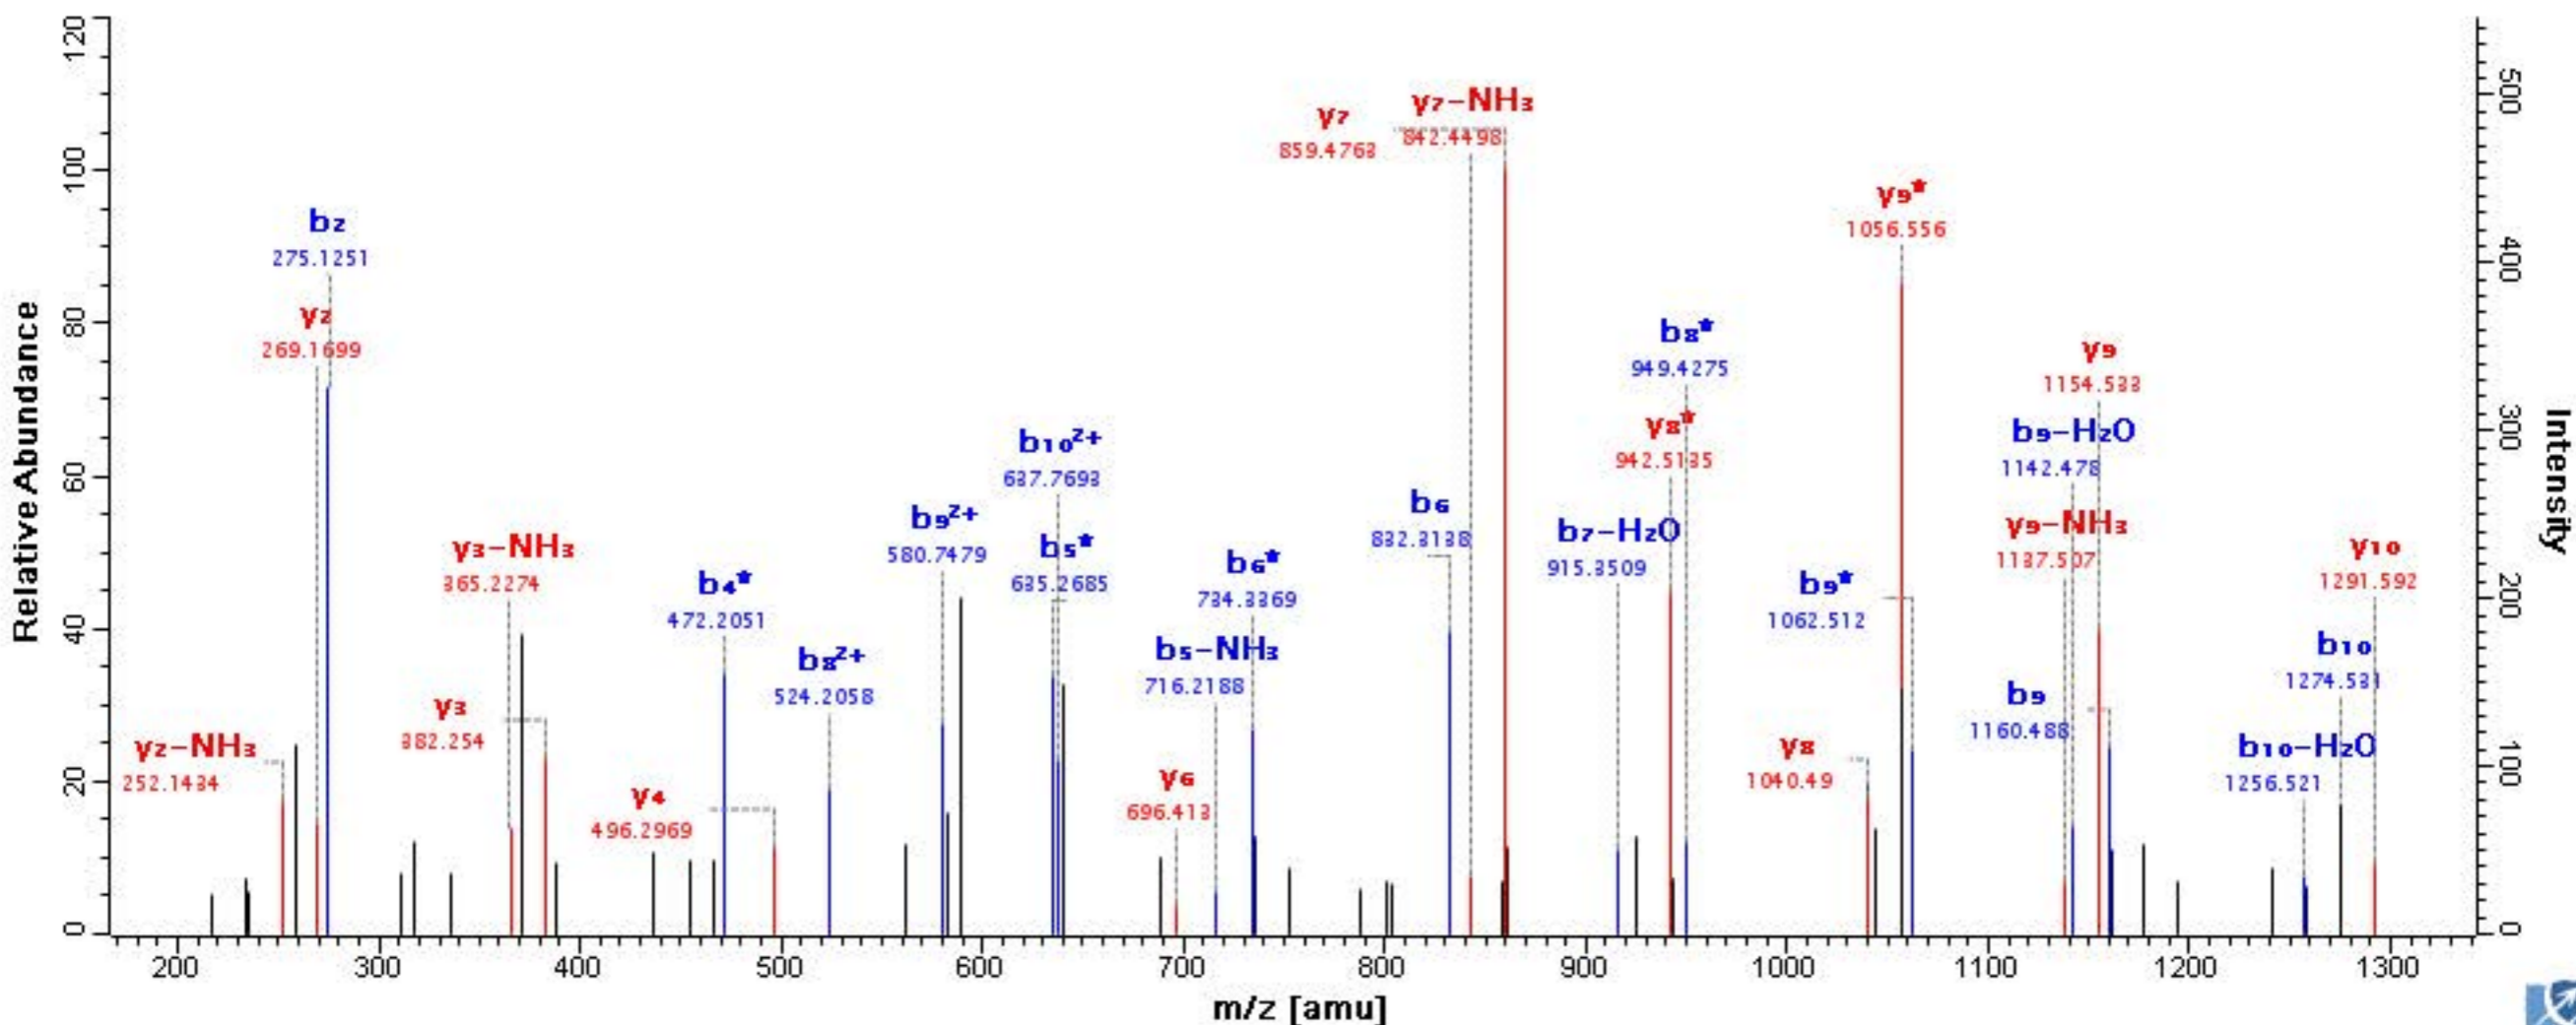

#### precursor information

|                   |                     |
|-------------------|---------------------|
| Mass:             | 1419.62973          |
| m/z:              | System.Collections. |
| Charge:           | System.Collections. |
| Retentiontime:    | System.Collections. |
| Score:            | 204.1739            |
| Mass Error [ppm]: | 0.075029            |
| PEP:              | 3.8907E-49          |
| Precursor Type:   | MULTI               |

#### general information

|                       |           |
|-----------------------|-----------|
| Annotation:           | 9 of 11   |
| AminoAcids Coverage:  | 82 %      |
| Intensity Coverage:   | 61 %      |
| Protein Localisation: | 31 ... 41 |

| b <sup>2+</sup> ion |              | b ion      |              |    | y ion |          |                         |
|---------------------|--------------|------------|--------------|----|-------|----------|-------------------------|
| Δ dalton            | mass         | Δ dalton   | mass         |    | seq   | Δ dalton | mass                    |
|                     | 138.06618833 |            | 138.06618833 | 1  | H     | 10       |                         |
|                     | 275.12510019 | -0.0430384 | 275.12510019 | 2  | H     | 9        | 1291.592191 +0.2138393  |
|                     | 389.16802764 |            | 389.16802764 | 3  | N     | 8        | 1154.5332791 -0.0116727 |
|                     | 570.18203652 |            | 570.18203652 | 4  | T     | 7        | 1040.4903517 +0.0550585 |
|                     | 733.24536506 |            | 733.24536506 | 5  | Y     | 6        | 859.47634279 +0.1897339 |
|                     | 832.31377898 | +0.0460233 | 832.31377898 | 6  | V     | 5        | 696.41301425 +0.2572128 |
|                     | 933.36145745 |            | 933.36145745 | 7  | T     | 4        | 597.34460033            |
| +0.0652875          | 524.20583068 |            | 1047.4043849 | 8  | N     | 3        | 496.29692186 +0.0158833 |
| -0.385619           | 580.74786267 | +0.1234896 | 1160.4884489 | 9  | I     | 2        | 382.25399441 -0.0053982 |
| -0.0773708          | 637.7693264  | +0.1779743 | 1274.5313763 | 10 | N     | 1        | 269.16993043 +0.2077551 |
|                     |              |            |              | 11 | K     | 0        | 155.12700298            |

Source: 20120514\_VR\_Bsu\_TripleSILACrep1\_pL2ESLS\_F17  
 Scannumber: 4974  
 Protein: BSU01130; tuf; tufA  
 Peptide Score: 136.39  
 Method: ITMS; CID; 3

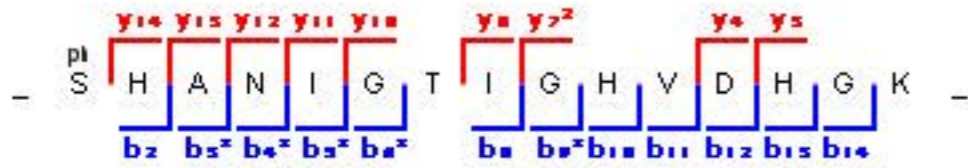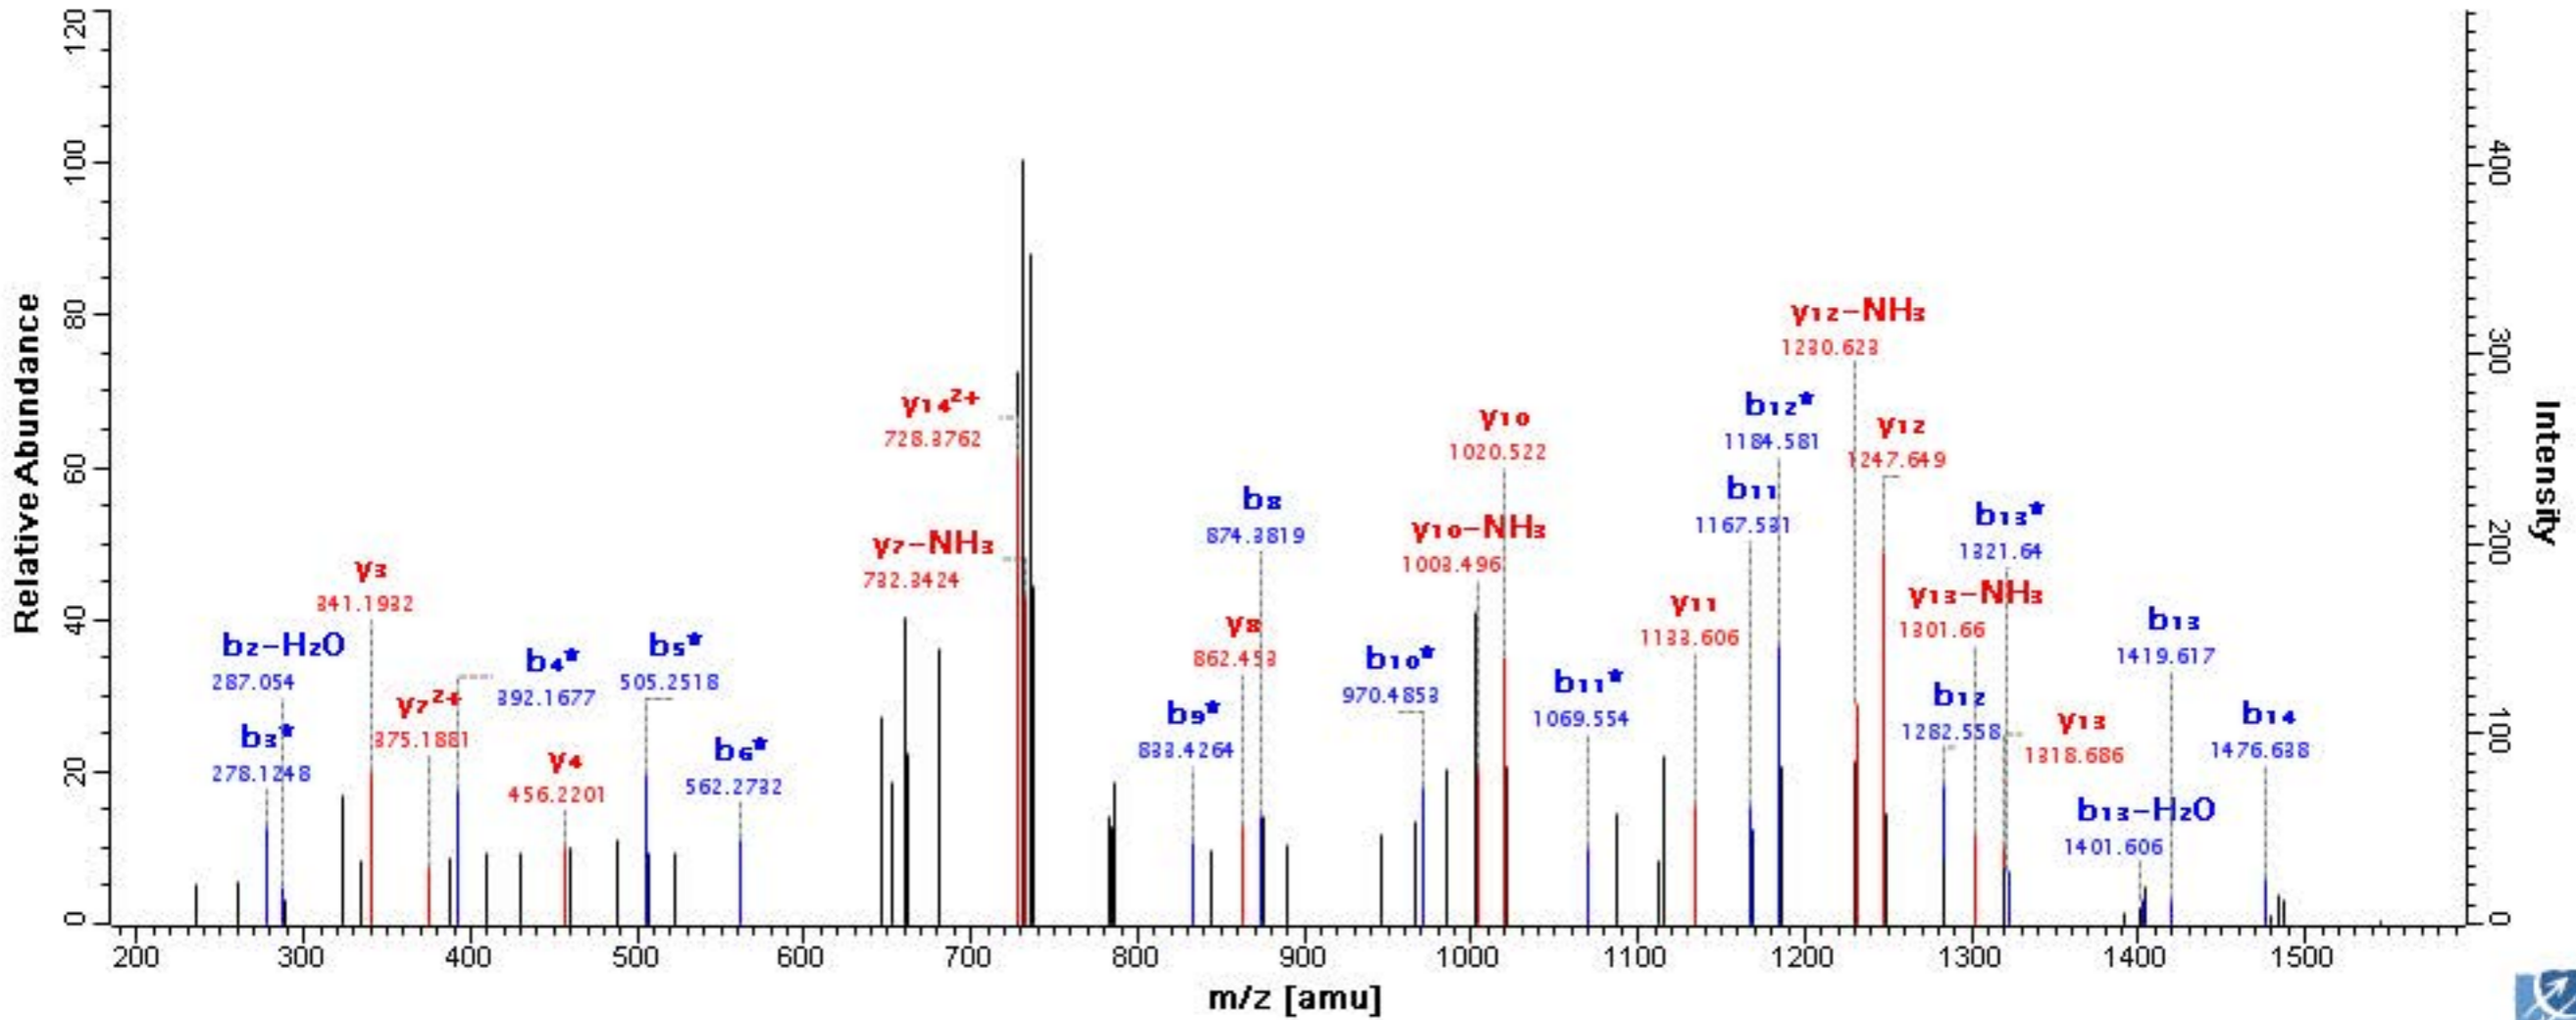

#### precursor information

|                   |                     |
|-------------------|---------------------|
| Mass:             | 1621.73645          |
| m/z:              | System.Collections. |
| Charge:           | System.Collections. |
| Retentiontime:    | System.Collections. |
| Score:            | 136.3949            |
| Mass Error [ppm]: | 0.14427             |
| PEP:              | 3.1213E-08          |
| Precursor Type:   | MULTI               |

#### general information

|                       |           |
|-----------------------|-----------|
| Annotation:           | 12 of 15  |
| AminoAcids Coverag    | 80 %      |
| Intensity Coverage:   | 37 %      |
| Protein Localisation: | 11 ... 25 |

| b ion      |              |    |     |    | gamma ion    |            | gamma <sup>2+</sup> ion |            |
|------------|--------------|----|-----|----|--------------|------------|-------------------------|------------|
| Δ dalton   | mass         |    | seq |    | Δ dalton     | mass       | Δ dalton                | mass       |
|            | 168.00563528 | 1  | S   | 14 |              |            |                         |            |
|            | 305.06454715 | 2  | H   | 13 | 1455.7451355 |            | 728.37620601            | +0.2375025 |
|            | 376.10166094 | 3  | A   | 12 | 1318.6862237 | -0.0680596 | 1318.6862237            |            |
|            | 490.14458838 | 4  | N   | 11 | 1247.6491099 | -0.0022593 | 1247.6491099            |            |
|            | 603.22865236 | 5  | I   | 10 | 1133.6061824 | +0.0598332 | 1133.6061824            |            |
|            | 660.25011609 | 6  | G   | 9  | 1020.5221185 | -0.0583123 | 1020.5221185            |            |
|            | 761.29779456 | 7  | T   | 8  | 963.50065475 |            | 963.50065475            |            |
| +0.2330707 | 874.38185854 | 8  | I   | 7  | 862.45297627 | +0.1695213 | 862.45297627            |            |
|            | 931.40332226 | 9  | G   | 6  | 749.36891229 |            | 375.18809438            | -0.1398766 |
|            | 1068.4622341 | 10 | H   | 5  | 692.34744857 |            | 692.34744857            |            |
| -0.1041344 | 1167.530648  | 11 | V   | 4  | 555.2885367  |            | 555.2885367             |            |
| +0.0638689 | 1282.5575911 | 12 | D   | 3  | 456.22012279 | +0.0212102 | 456.22012279            |            |
| +0.3550547 | 1419.6165029 | 13 | H   | 2  | 341.19317976 | +0.0592006 | 341.19317976            |            |
| +0.0700412 | 1476.6379667 | 14 | G   | 1  | 204.13426789 |            | 204.13426789            |            |
|            |              | 15 | K   | 0  | 147.11280417 |            | 147.11280417            |            |

Source: 20120514\_VR\_Bsu\_TripleSILACrep1\_pL2ESLS\_F19  
 Scannumber: 11196  
 Protein: BSU20420; yorD  
 Peptide Score: 123.95  
 Method: ITMS; CID; 3

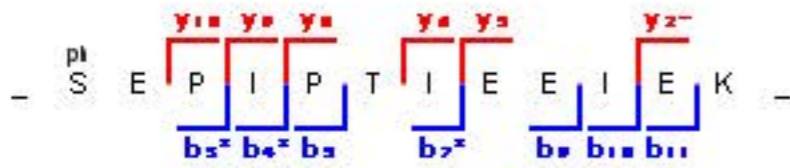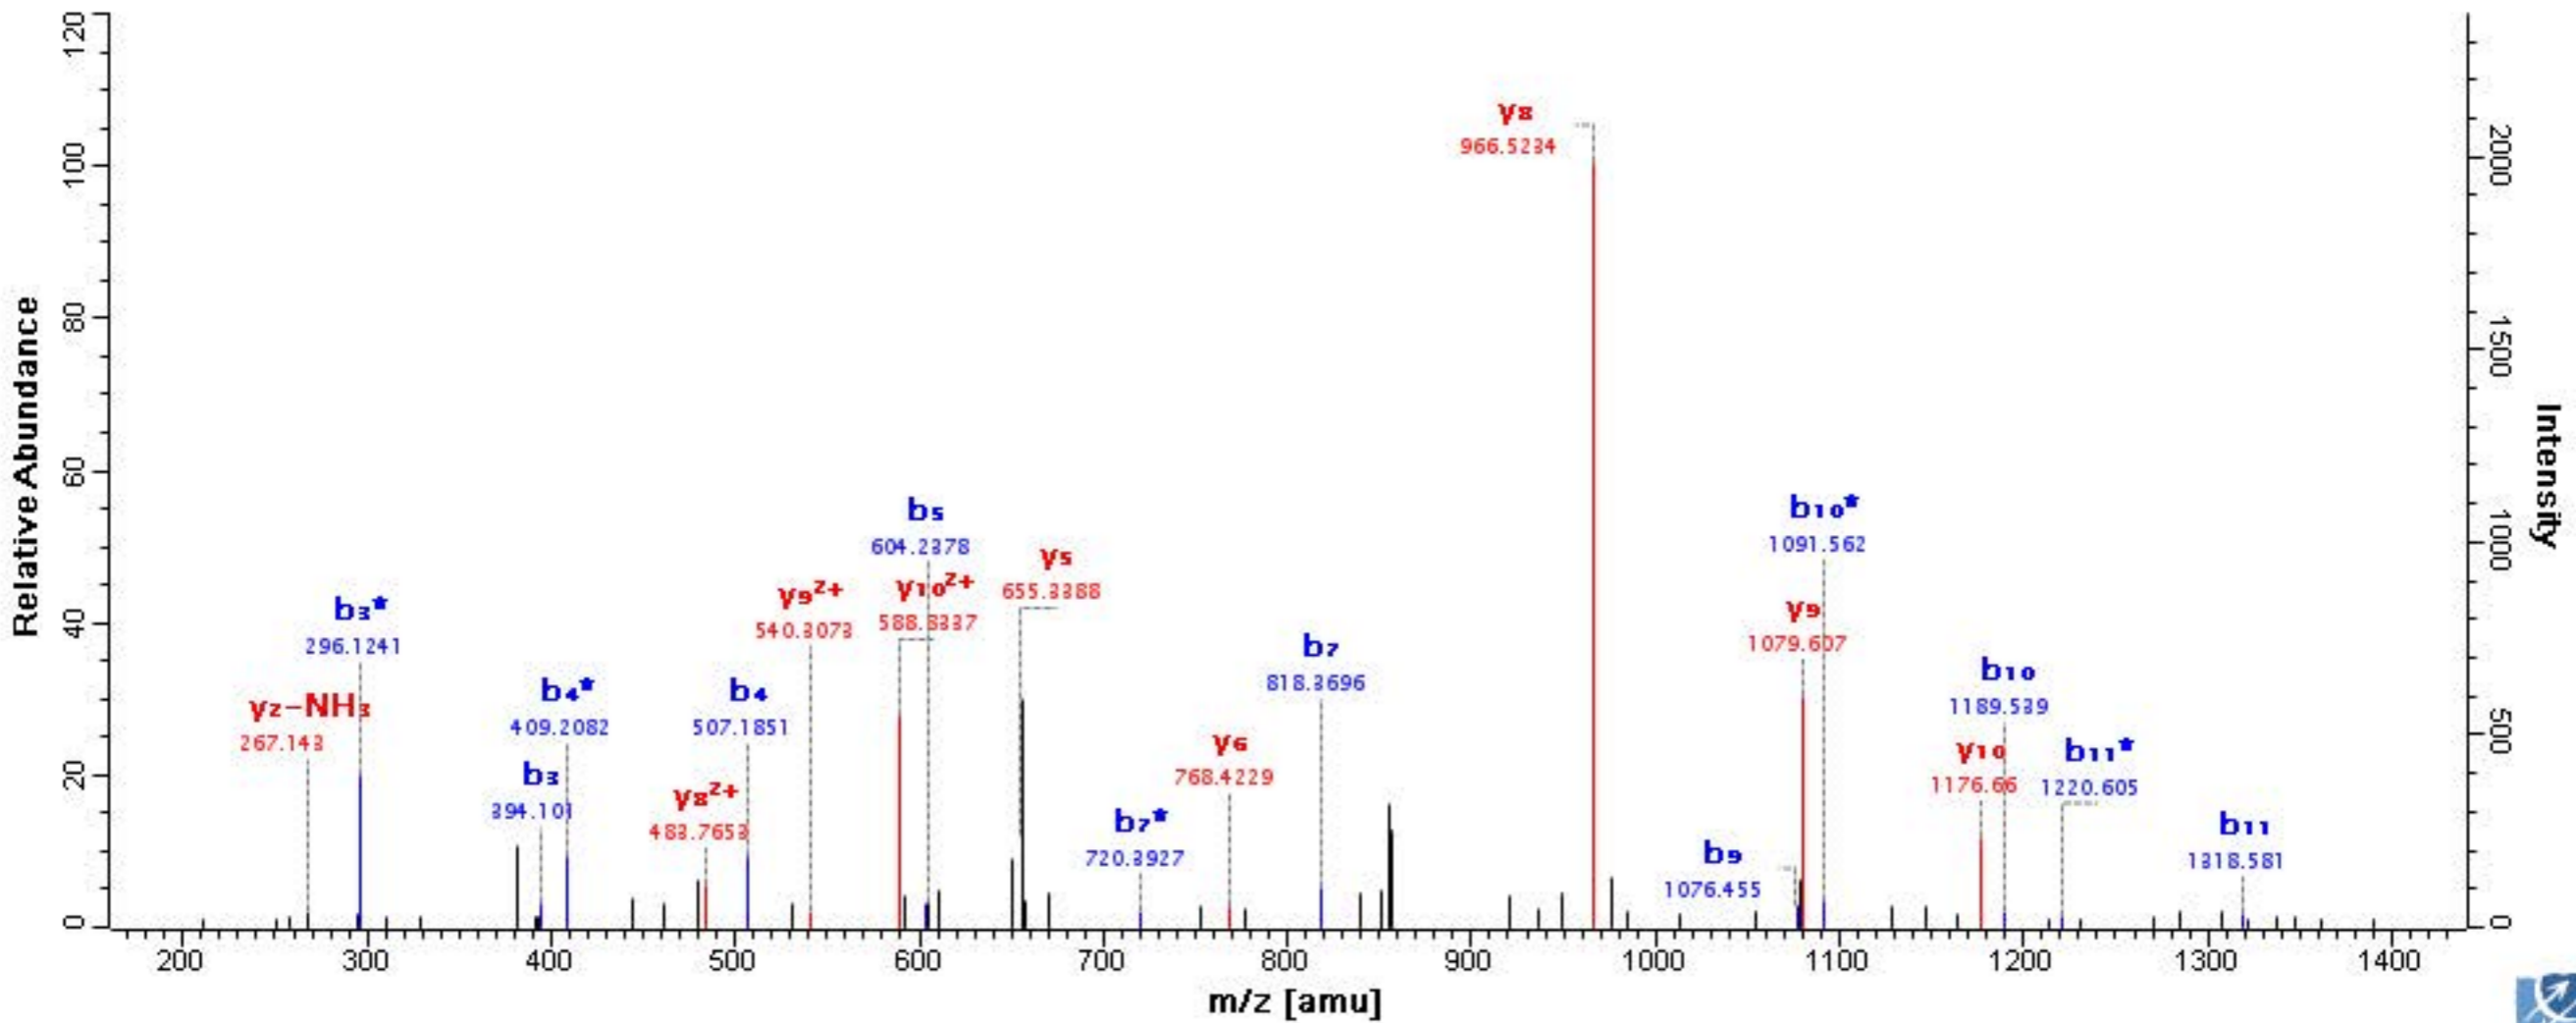

#### precursor information

|                   |                     |
|-------------------|---------------------|
| Mass:             | 1463.67947          |
| m/z:              | System.Collections. |
| Charge:           | System.Collections. |
| Retentiontime:    | System.Collections. |
| Score:            | 123.9483            |
| Mass Error [ppm]: | -0.12948            |
| PEP:              | 6.6552E-08          |
| Precursor Type:   | MULTI               |

#### general information

|                       |           |
|-----------------------|-----------|
| Annotation:           | 8 of 12   |
| AminoAcids Coverag    | 67 %      |
| Intensity Coverage:   | 57 %      |
| Protein Localisation: | 54 ... 65 |

| b ion           |              |    |     |    | $\gamma$ ion    |            | $\gamma^{2+}$ ion |            |
|-----------------|--------------|----|-----|----|-----------------|------------|-------------------|------------|
| $\Delta$ dalton | mass         |    | seq |    | $\Delta$ dalton | mass       | $\Delta$ dalton   | mass       |
|                 | 168.00563528 | 1  | S   | 11 |                 |            |                   |            |
|                 | 297.04822838 | 2  | E   | 10 | 1305.7027735    |            | 1305.7027735      |            |
| +0.300436       | 394.10099223 | 3  | P   | 9  | 1176.6601804    | +0.0588137 | 588.83372843      | -0.0894047 |
| +0.0466332      | 507.18505621 | 4  | I   | 8  | 1079.6074165    | +0.1604057 | 540.3073465       | +0.181362  |
| -0.2934231      | 604.23782007 | 5  | P   | 7  | 966.52335256    | -0.1221685 | 483.76531451      | +0.1350151 |
|                 | 705.28549854 | 6  | T   | 6  | 869.47058871    |            | 869.47058871      |            |
| -0.0064644      | 818.36956252 | 7  | I   | 5  | 768.42291023    | +0.1256127 | 768.42291023      |            |
|                 | 947.41215562 | 8  | E   | 4  | 655.33884625    | +0.1956996 | 655.33884625      |            |
| +0.3899779      | 1076.4547487 | 9  | E   | 3  | 526.29625316    |            | 526.29625316      |            |
| -0.0266057      | 1189.5388127 | 10 | I   | 2  | 397.25366006    |            | 397.25366006      |            |
| -0.0903169      | 1318.5814058 | 11 | E   | 1  | 284.16959608    |            | 284.16959608      |            |
|                 |              | 12 | K   | 0  | 155.12700298    |            | 155.12700298      |            |

Source: 20120514\_VR\_Bsu\_TripleSILACrep1\_pL2ESLS\_F19  
 Scannumber: 12102  
 Protein: ahpC; BSU40090  
 Peptide Score: 207.79  
 Method: ITMS; CID; 3

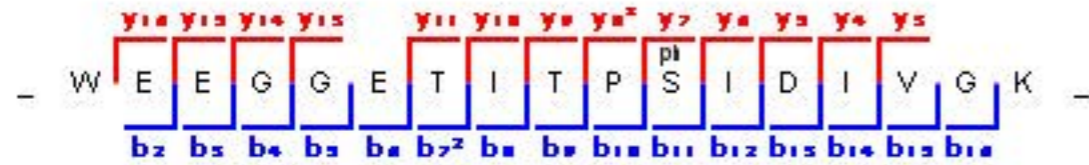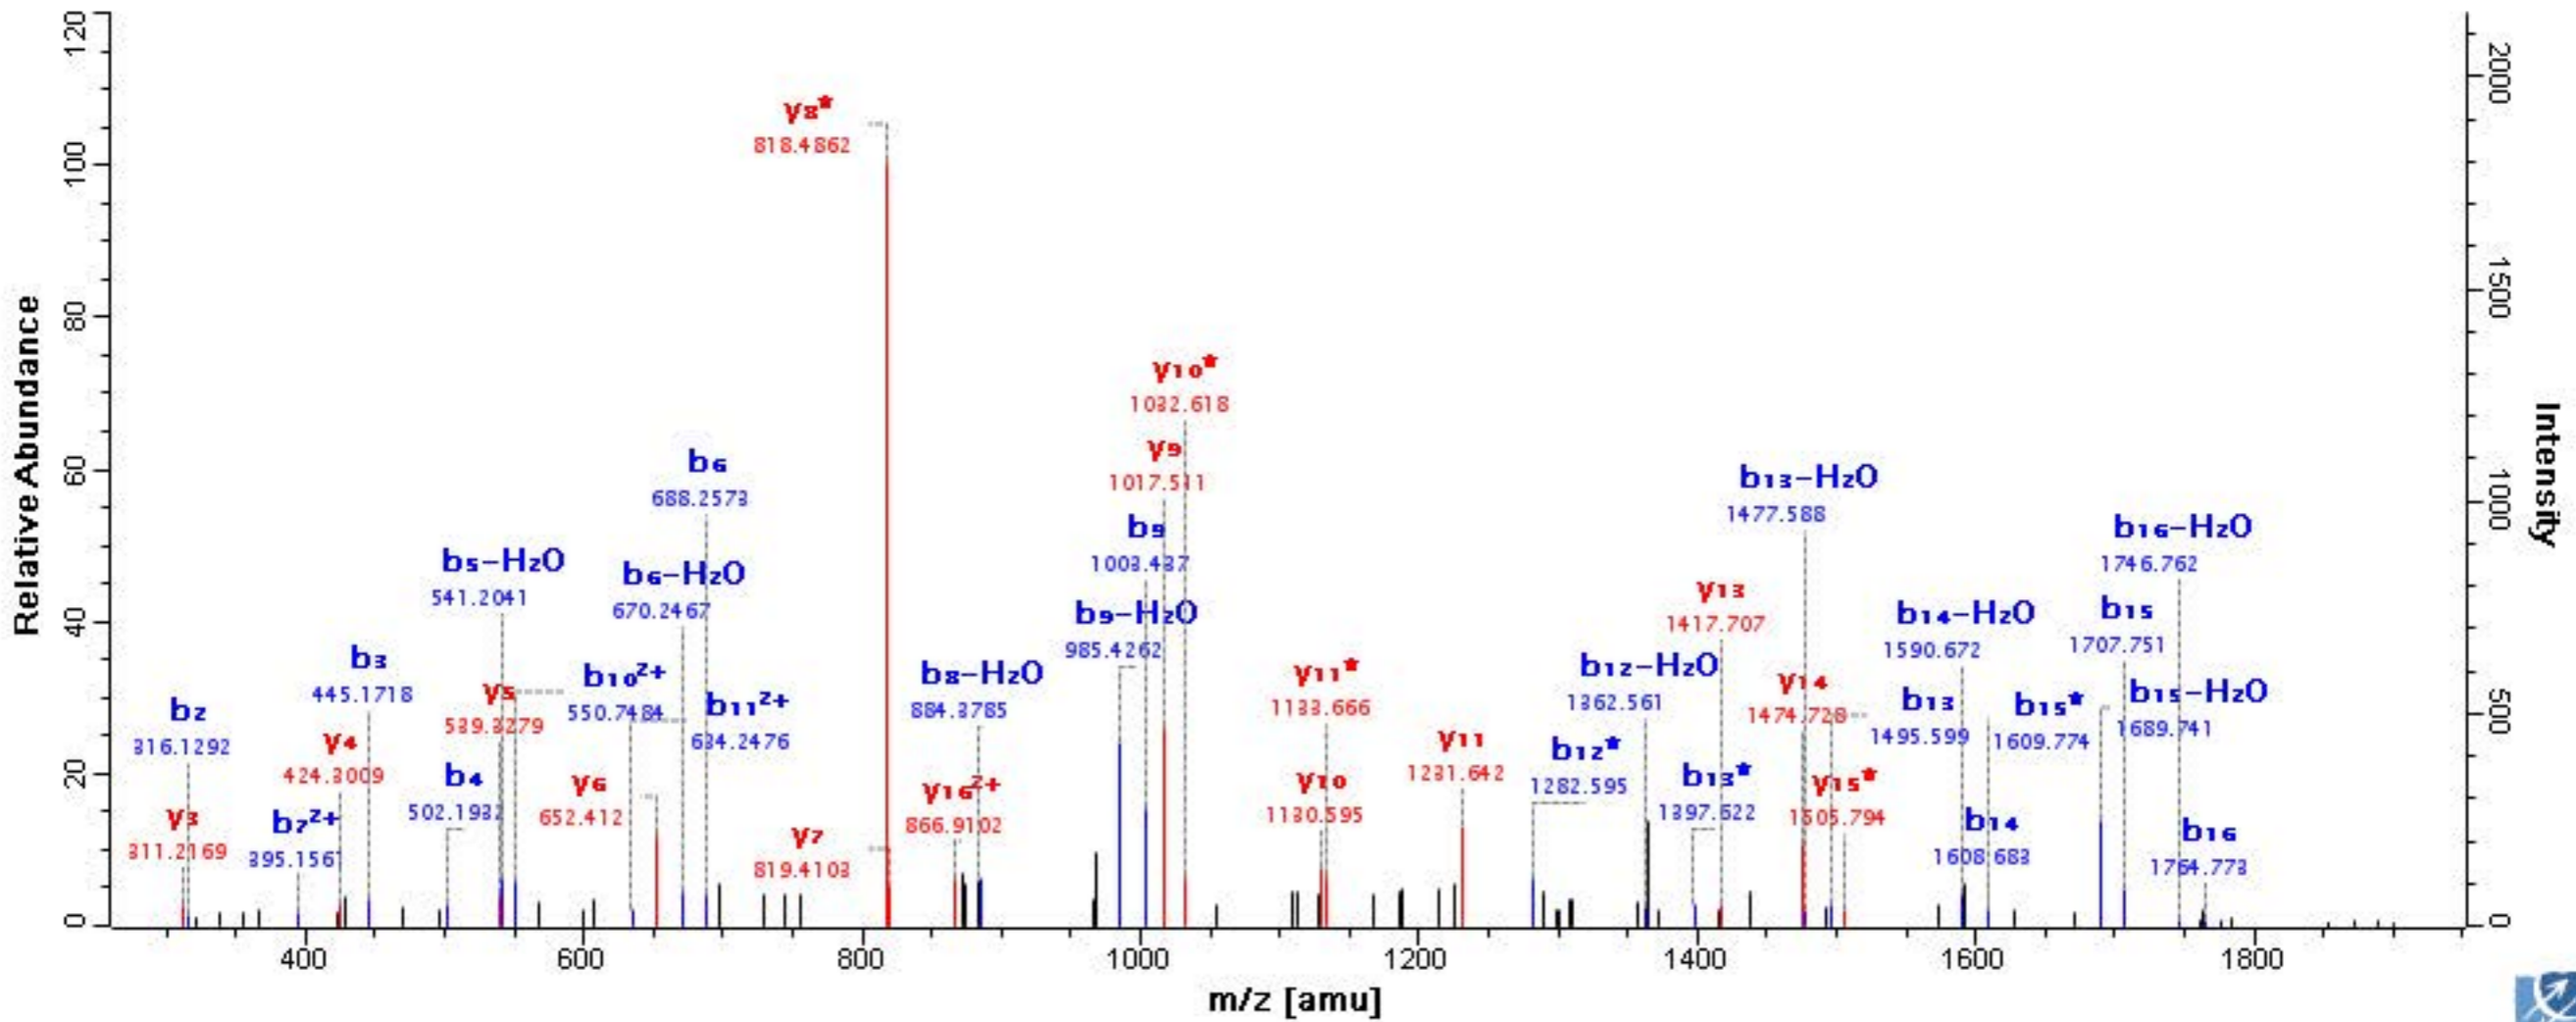

**precursor information**

|                   |                     |
|-------------------|---------------------|
| Mass:             | 1917.88584          |
| m/z:              | System.Collections. |
| Charge:           | System.Collections. |
| Retentiontime:    | System.Collections. |
| Score:            | 207.7904            |
| Mass Error [ppm]: | 0.31165             |
| PEP:              | 3.4131E-107         |
| Precursor Type:   | ISO                 |

| b <sup>2+</sup> ion |          | b ion     |          | seq |   |    | γ ion    |           | γ <sup>2+</sup> ion |           |
|---------------------|----------|-----------|----------|-----|---|----|----------|-----------|---------------------|-----------|
| Δ dalton            | mass     | Δ dalton  | mass     |     |   |    | Δ dalton | mass      | Δ dalton            | mass      |
|                     | 187.0866 |           | 187.0866 | 1   | W | 16 |          |           |                     |           |
|                     | 316.1292 | -0.101289 | 316.1292 | 2   | E | 15 | 1732.813 |           | 866.9102            | -0.395835 |
|                     | 445.1718 | +0.071999 | 445.1718 | 3   | E | 14 | 1603.771 |           | 1603.771            |           |
|                     | 502.1932 | -0.287478 | 502.1932 | 4   | G | 13 | 1474.728 | +0.0005   | 1474.728            |           |
|                     | 559.2147 |           | 559.2147 | 5   | G | 12 | 1417.707 | +0.105093 | 1417.707            |           |
|                     | 688.2573 | +0.232023 | 688.2573 | 6   | E | 11 | 1360.685 |           | 1360.685            |           |
| +0.107485           | 395.1561 |           | 789.305  | 7   | T | 10 | 1231.642 | -0.011758 | 1231.642            |           |
|                     | 902.389  |           | 902.389  | 8   | I | 9  | 1130.595 | +0.065095 | 1130.595            |           |
|                     | 1003.437 | +0.028371 | 1003.437 | 9   | T | 8  | 1017.511 | +0.223561 | 1017.511            |           |
| +0.478184           | 550.7484 |           | 1100.489 | 10  | P | 7  | 916.4631 |           | 916.4631            |           |
| +0.286805           | 634.2476 |           | 1267.488 | 11  | S | 6  | 819.4103 | -0.024141 | 819.4103            |           |
|                     | 1380.572 |           | 1380.572 | 12  | I | 5  | 652.412  | -0.038111 | 652.412             |           |
|                     | 1495.599 | +0.146637 | 1495.599 | 13  | D | 4  | 539.3279 | +0.088555 | 539.3279            |           |
|                     | 1608.683 | -0.076343 | 1608.683 | 14  | I | 3  | 424.3009 | -0.079631 | 424.3009            |           |
|                     | 1707.751 | +0.042254 | 1707.751 | 15  | V | 2  | 311.2169 | -0.010826 | 311.2169            |           |
|                     | 1764.773 | -0.135948 | 1764.773 | 16  | G | 1  | 212.1485 |           | 212.1485            |           |
|                     |          |           |          | 17  | K | 0  | 155.127  |           | 155.127             |           |

**general information**

|                       |             |
|-----------------------|-------------|
| Annotation:           | 15 of 17    |
| AminoAcids Coverag    | 88 %        |
| Intensity Coverage:   | 63 %        |
| Protein Localisation: | 170 ... 186 |

Source: 20120514\_VR\_Bsu\_TripleSILACrep1\_pL2ESLS\_F19  
 Scannumber: 14285  
 Protein: BSU32250; thrC  
 Peptide Score: 140.42  
 Method: ITMS; CID; 3

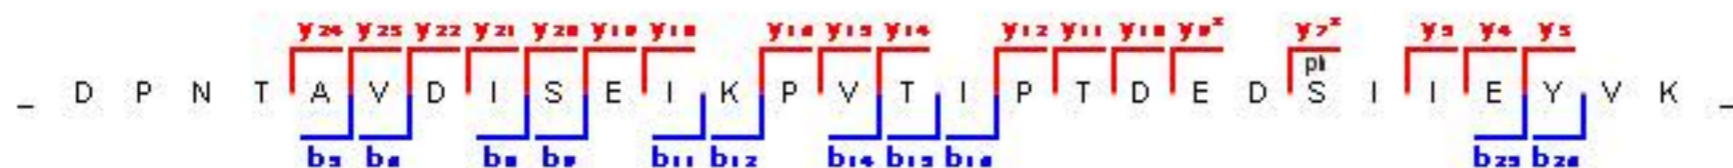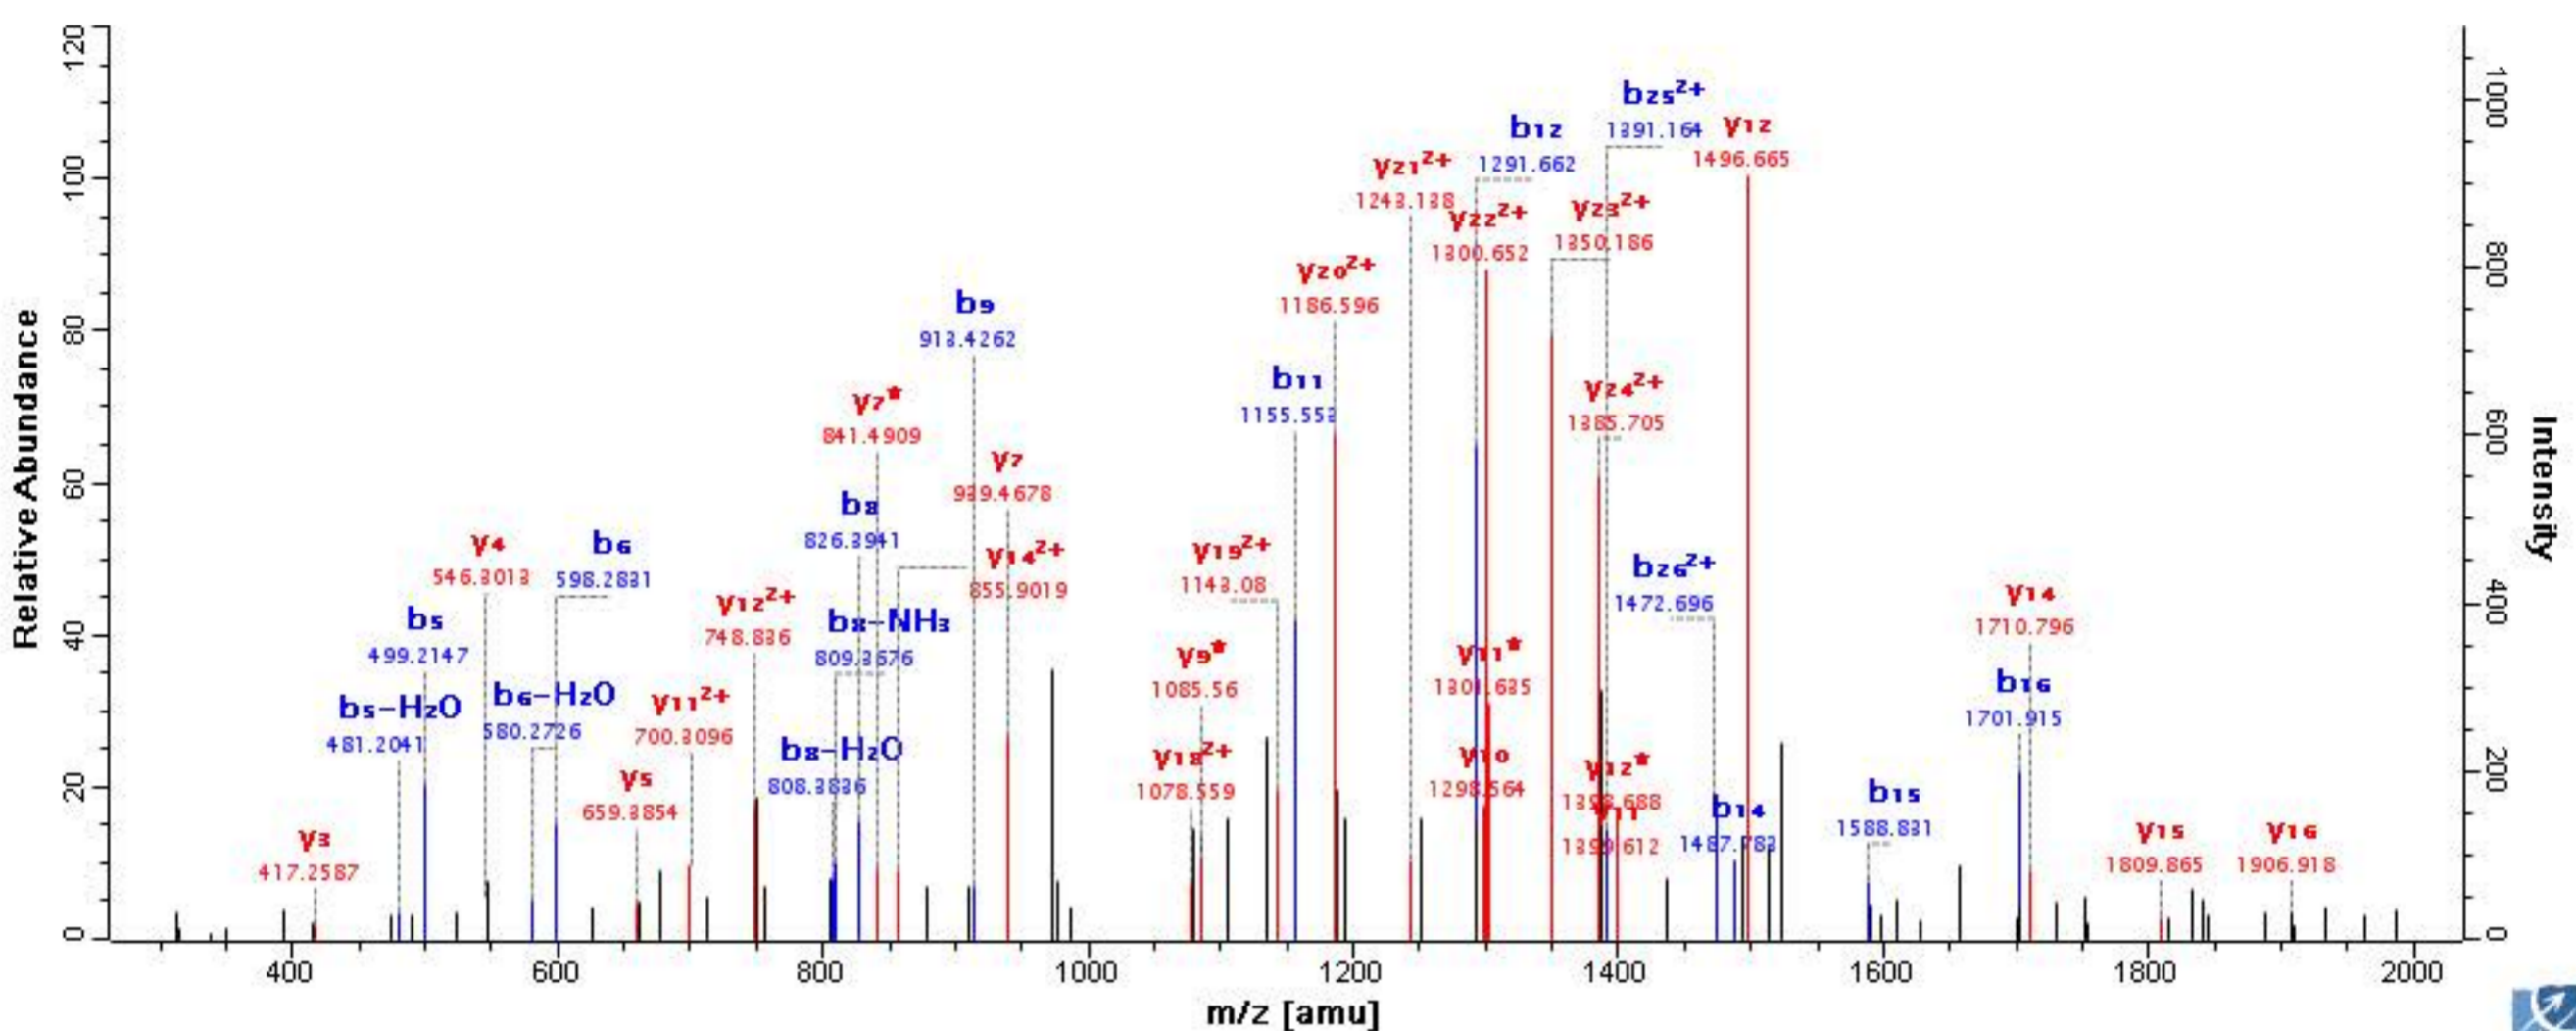

#### precursor information

|                   |                     |
|-------------------|---------------------|
| Mass:             | 3180.5366           |
| m/z:              | System.Collections. |
| Charge:           | System.Collections. |
| Retentiontime:    | System.Collections. |
| Score:            | 140.4163            |
| Mass Error [ppm]: | -0.027215           |
| PEP:              | 4.2353E-25          |
| Precursor Type:   | MULTI               |

| b <sup>2+</sup> ion |          | b ion     |          |     | y ion |          | y <sup>2+</sup> ion |           |          |           |
|---------------------|----------|-----------|----------|-----|-------|----------|---------------------|-----------|----------|-----------|
| Δ dalton            | mass     | Δ dalton  | mass     | seq |       | Δ dalton | mass                | Δ dalton  | mass     |           |
|                     | 116.0342 |           | 116.0342 | 1   | D     | 27       |                     |           |          |           |
|                     | 213.087  |           | 213.087  | 2   | P     | 26       | 3082.545            |           | 3082.545 |           |
|                     | 327.1299 |           | 327.1299 | 3   | N     | 25       | 2985.493            |           | 2985.493 |           |
|                     | 428.1776 |           | 428.1776 | 4   | T     | 24       | 2871.45             |           | 2871.45  |           |
|                     | 499.2147 | +0.073749 | 499.2147 | 5   | A     | 23       | 2770.402            |           | 1385.705 | +0.097705 |
|                     | 598.2831 | +0.139124 | 598.2831 | 6   | V     | 22       | 2699.365            |           | 1350.186 | +0.229055 |
|                     | 713.3101 |           | 713.3101 | 7   | D     | 21       | 2600.297            |           | 1300.652 | +0.389117 |
|                     | 826.3941 | +0.073649 | 826.3941 | 8   | I     | 20       | 2485.27             |           | 1243.138 | +0.03418  |
|                     | 913.4262 | +0.210078 | 913.4262 | 9   | S     | 19       | 2372.186            |           | 1186.596 | +0.086344 |
|                     | 1042.469 |           | 1042.469 | 10  | E     | 18       | 2285.153            |           | 1143.08  | +0.199892 |
|                     | 1155.553 | +0.005662 | 1155.553 | 11  | I     | 17       | 2156.111            |           | 1078.559 | -0.163455 |
|                     | 1291.662 | +0.013322 | 1291.662 | 12  | K     | 16       | 2043.027            |           | 2043.027 |           |
|                     | 1388.715 |           | 1388.715 | 13  | P     | 15       | 1906.918            | +0.117733 | 1906.918 |           |
|                     | 1487.783 | +0.193413 | 1487.783 | 14  | V     | 14       | 1809.865            | +0.269985 | 1809.865 |           |
|                     | 1588.831 | +0.175398 | 1588.831 | 15  | T     | 13       | 1710.796            | +0.096455 | 855.9019 | +0.475803 |
|                     | 1701.915 | +0.218165 | 1701.915 | 16  | I     | 12       | 1609.749            |           | 1609.749 |           |
|                     | 1798.968 |           | 1798.968 | 17  | P     | 11       | 1496.665            | +0.055346 | 748.836  | +0.012987 |
|                     | 1900.015 |           | 1900.015 | 18  | T     | 10       | 1399.612            | +0.131425 | 700.3096 | -0.308104 |
|                     | 2015.042 |           | 2015.042 | 19  | D     | 9        | 1298.564            | +0.191067 | 1298.564 |           |
|                     | 2144.085 |           | 2144.085 | 20  | E     | 8        | 1183.537            |           | 1183.537 |           |
|                     | 2259.112 |           | 2259.112 | 21  | D     | 7        | 1054.495            |           | 1054.495 |           |
|                     | 2426.11  |           | 2426.11  | 22  | S     | 6        | 939.4678            | +0.024484 | 939.4678 |           |
|                     | 2539.194 |           | 2539.194 | 23  | I     | 5        | 772.4695            |           | 772.4695 |           |
|                     | 2652.278 |           | 2652.278 | 24  | I     | 4        | 659.3854            | +0.166722 | 659.3854 |           |
| +0.191018           | 1391.164 |           | 2781.321 | 25  | E     | 3        | 546.3013            | +0.164238 | 546.3013 |           |
| +0.290945           | 1472.696 |           | 2944.384 | 26  | Y     | 2        | 417.2587            | +0.215132 | 417.2587 |           |
|                     | 3043.453 |           | 3043.453 | 27  | V     | 1        | 254.1954            |           | 254.1954 |           |
|                     |          |           |          | 28  | K     | 0        | 155.127             |           | 155.127  |           |

#### general information

|                       |             |
|-----------------------|-------------|
| Annotation:           | 20 of 28    |
| AminoAcids Coverag    | 71 %        |
| Intensity Coverage:   | 64 %        |
| Protein Localisation: | 320 ... 347 |

Source: 20120514\_VR\_Bsu\_TripleSILACrep1\_pL2ESLS\_F19  
 Scannumber: 4333  
 Protein: BSU37670; ipa-87r; ywfI  
 Peptide Score: 121.08  
 Method: ITMS; CID; 3

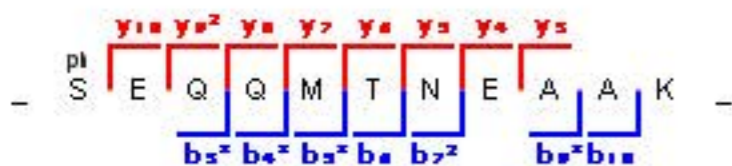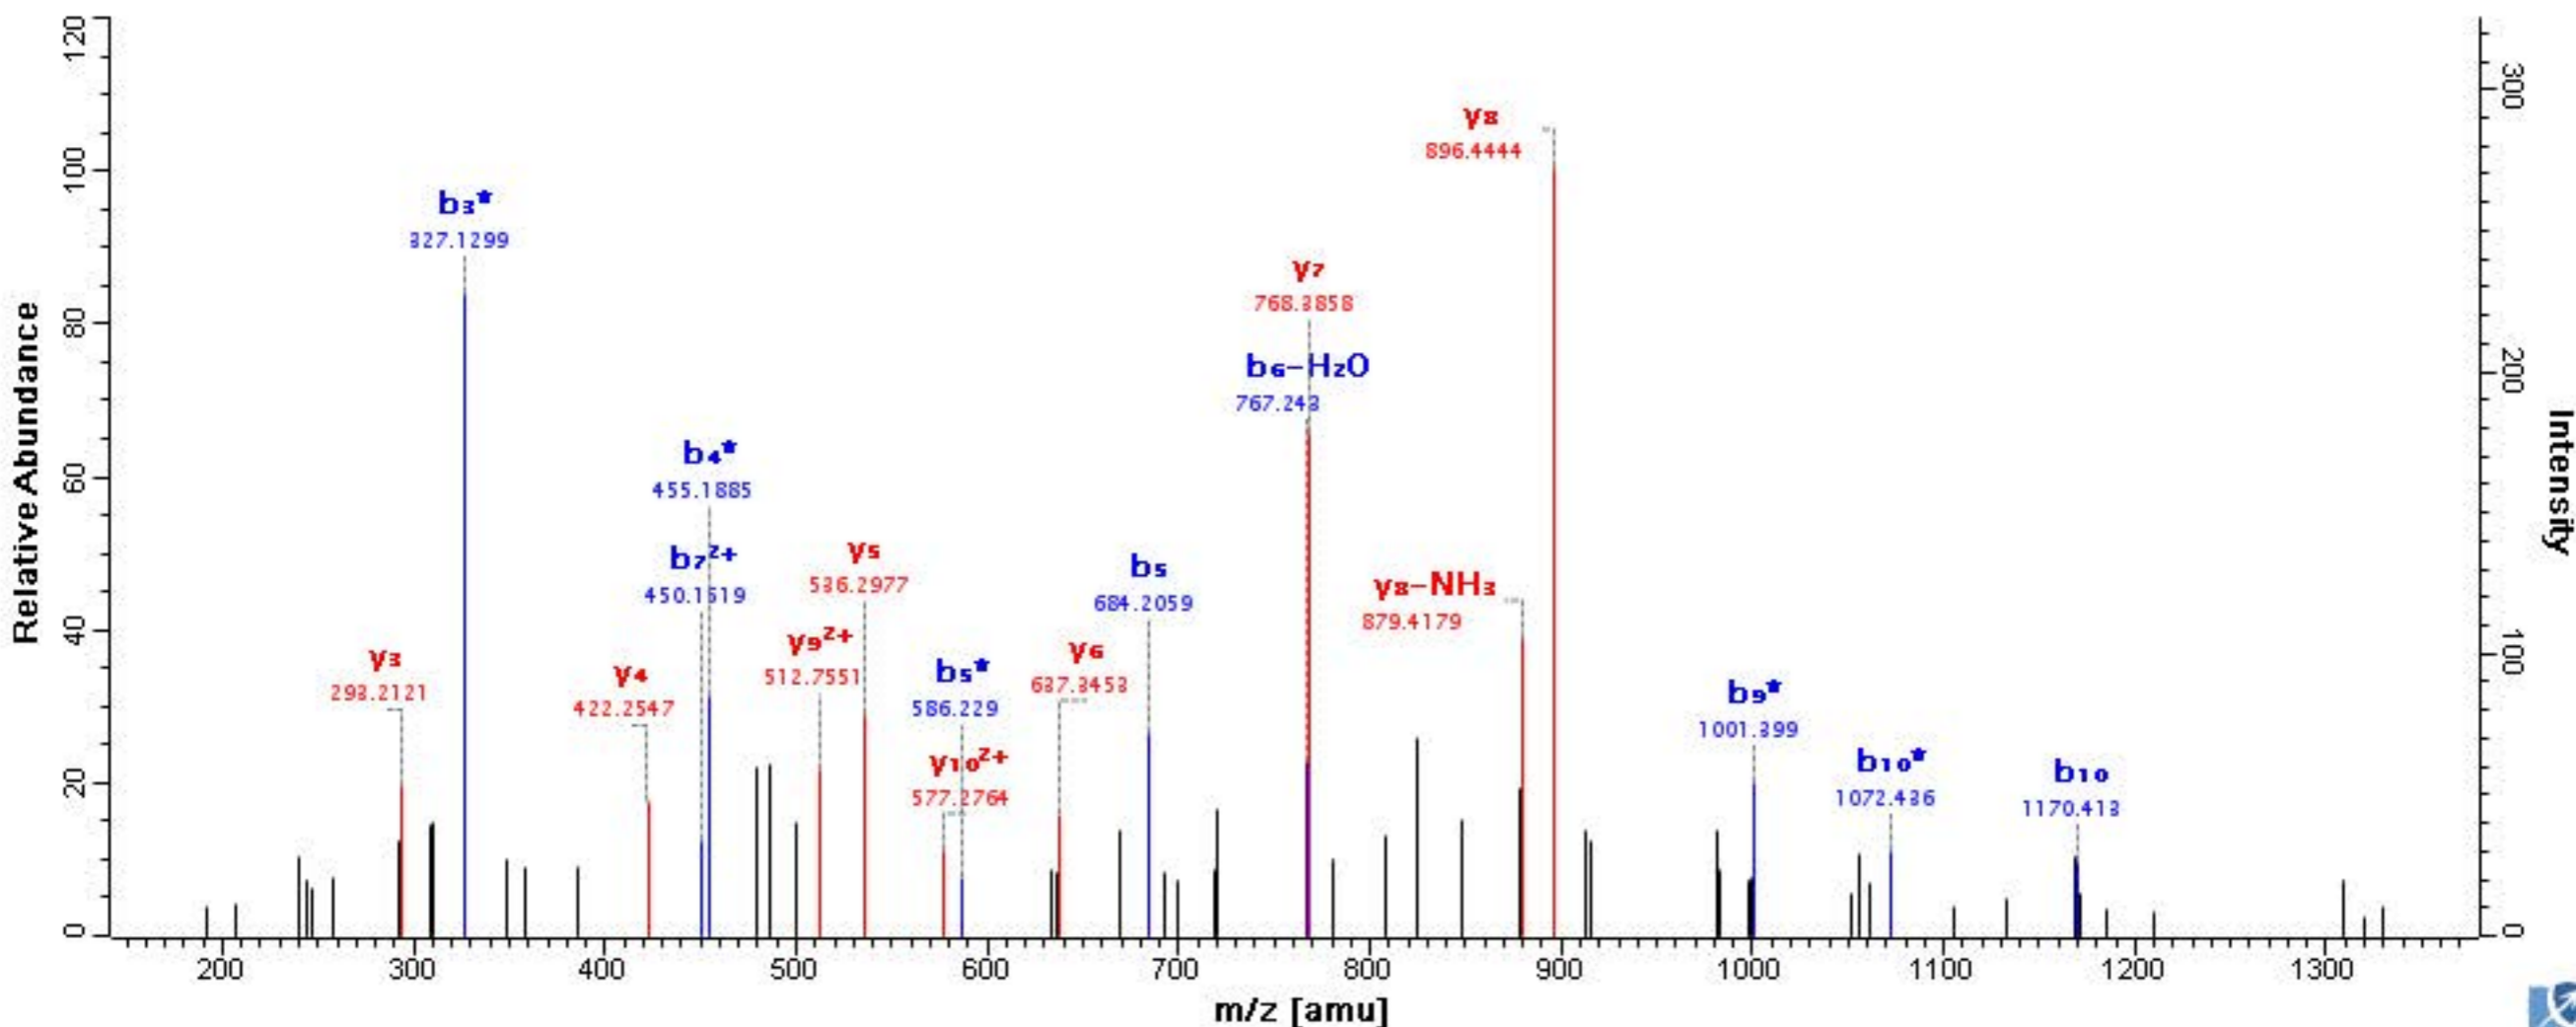

#### precursor information

|                   |                     |
|-------------------|---------------------|
| Mass:             | 1315.51144          |
| m/z:              | System.Collections. |
| Charge:           | System.Collections. |
| Retentiontime:    | System.Collections. |
| Score:            | 121.076             |
| Mass Error [ppm]: | -0.083049           |
| PEP:              | 3.5208E-06          |
| Precursor Type:   | MULTI               |

#### general information

|                       |          |
|-----------------------|----------|
| Annotation:           | 9 of 11  |
| AminoAcids Coverage:  | 82 %     |
| Intensity Coverage:   | 53 %     |
| Protein Localisation: | 2 ... 12 |

| b <sup>2+</sup> ion |          | b ion     |          |    |     |    | γ ion    |           | γ <sup>2+</sup> ion |           |
|---------------------|----------|-----------|----------|----|-----|----|----------|-----------|---------------------|-----------|
| Δ dalton            | mass     | Δ dalton  | mass     |    | seq |    | Δ dalton | mass      | Δ dalton            | mass      |
|                     | 168.0056 |           | 168.0056 | 1  | S   | 10 |          |           |                     |           |
|                     | 297.0482 |           | 297.0482 | 2  | E   | 9  | 1153.546 |           | 577.2764            | -0.092647 |
|                     | 425.1068 |           | 425.1068 | 3  | Q   | 8  | 1024.503 |           | 512.7551            | +0.02771  |
|                     | 553.1654 |           | 553.1654 | 4  | Q   | 7  | 896.4444 | +0.084897 | 896.4444            |           |
|                     | 684.2059 | +0.146488 | 684.2059 | 5  | M   | 6  | 768.3858 | +0.086834 | 768.3858            |           |
|                     | 785.2535 |           | 785.2535 | 6  | T   | 5  | 637.3453 | +0.227538 | 637.3453            |           |
| +0.190532           | 450.1519 |           | 899.2965 | 7  | N   | 4  | 536.2977 | +0.033701 | 536.2977            |           |
|                     | 1028.339 |           | 1028.339 | 8  | E   | 3  | 422.2547 | +0.106901 | 422.2547            |           |
|                     | 1099.376 |           | 1099.376 | 9  | A   | 2  | 293.2121 | +0.075764 | 293.2121            |           |
|                     | 1170.413 | +0.106725 | 1170.413 | 10 | A   | 1  | 222.175  |           | 222.175             |           |
|                     |          |           |          | 11 | K   | 0  | 151.1379 |           | 151.1379            |           |



Source: 20120514\_VR\_Bsu\_TripleSILACrep1\_pL2ESLS\_F19  
 Scannumber: 7148  
 Protein: BSU13180; metC; metE  
 Peptide Score: 109.72  
 Method: ITMS; CID; 3

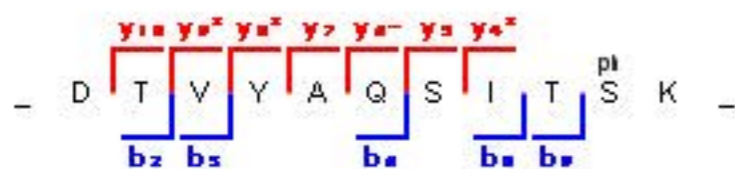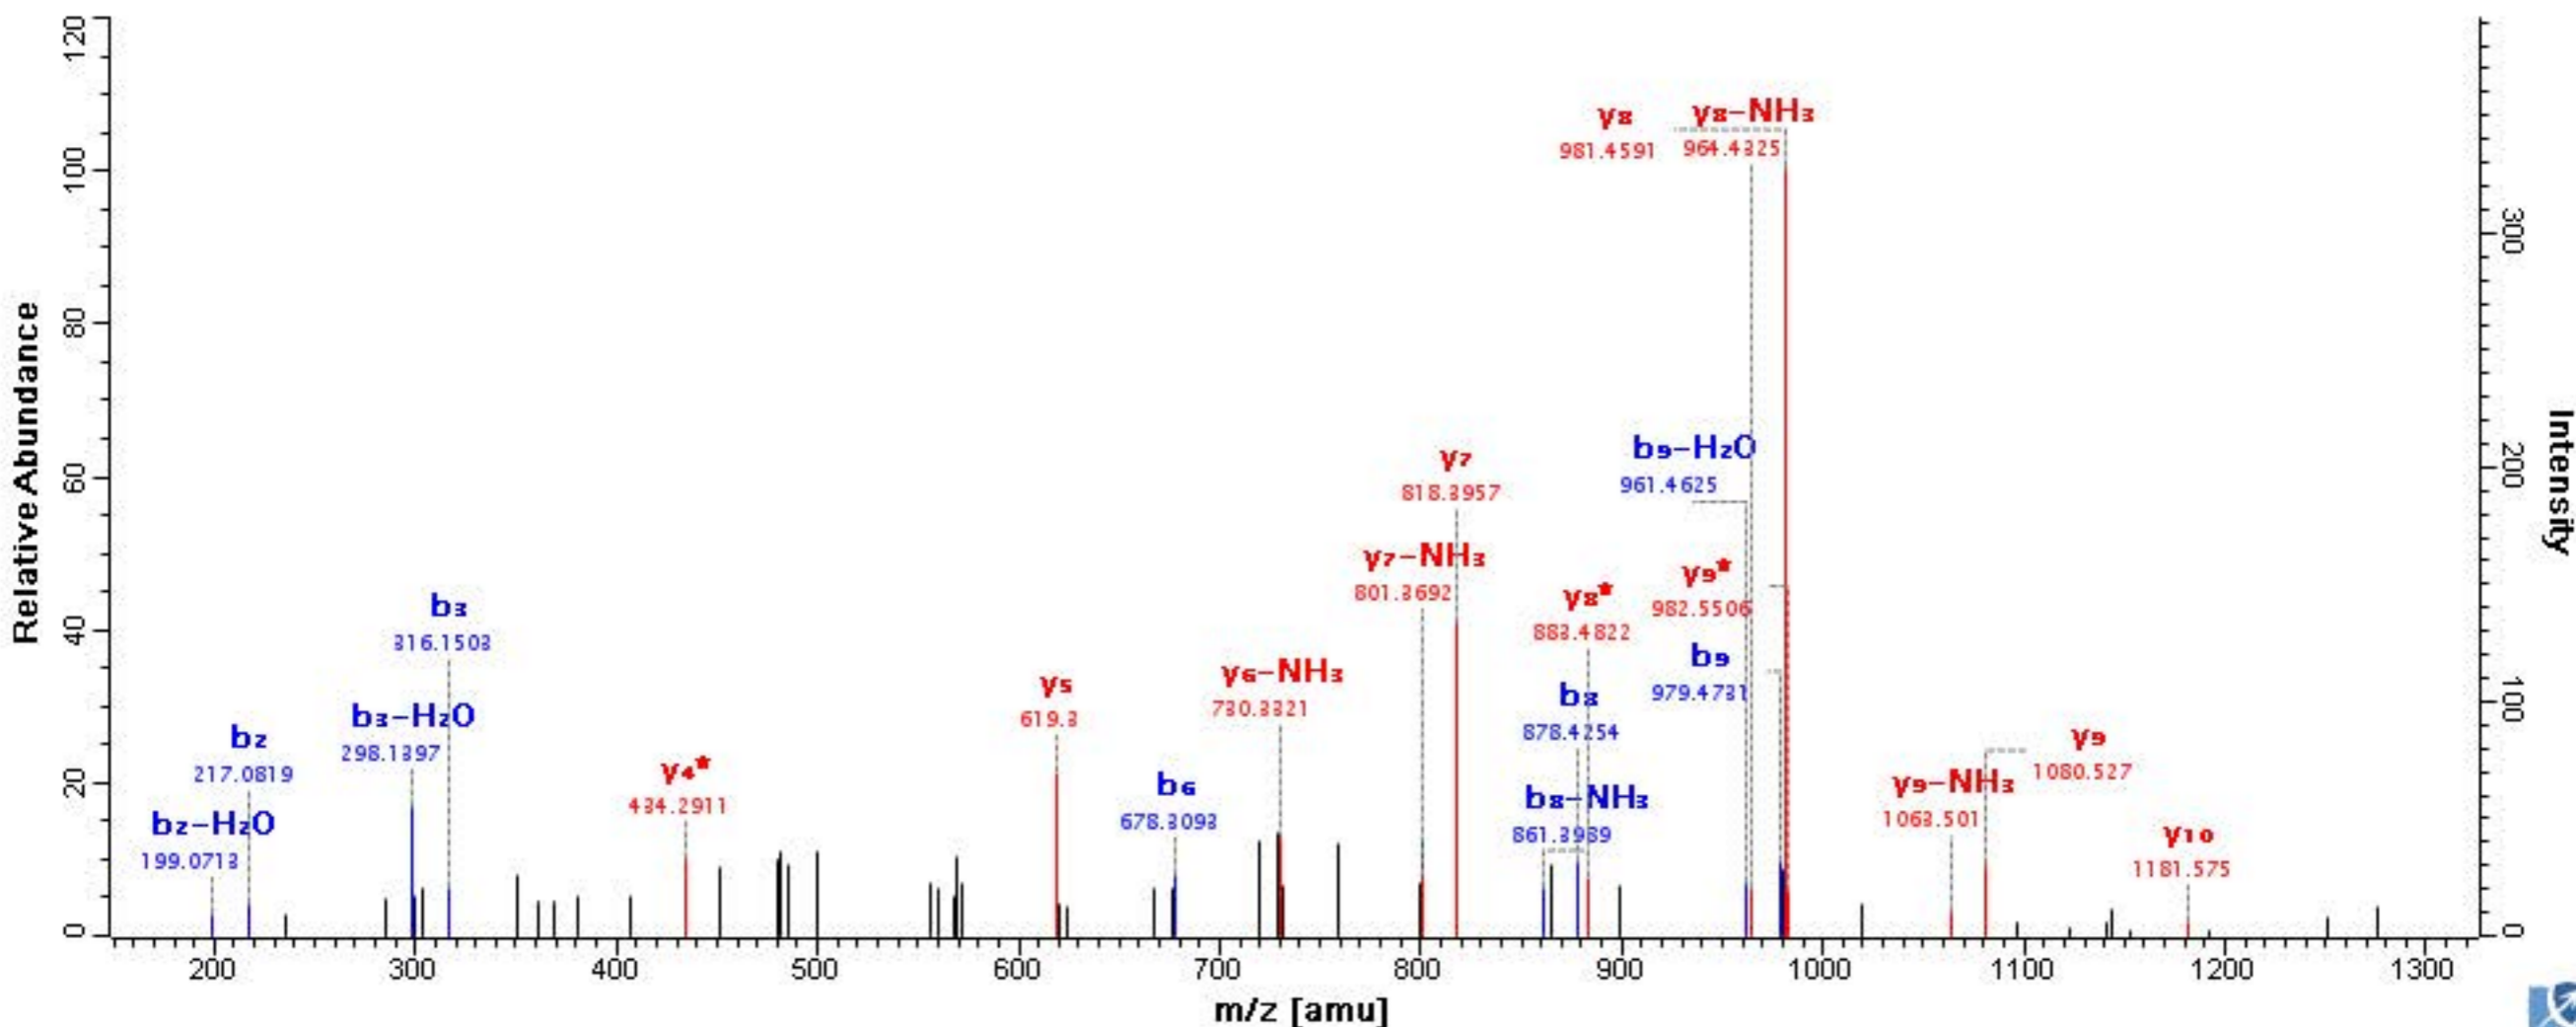

**precursor information**

|                   |                     |
|-------------------|---------------------|
| Mass:             | 1291.56974          |
| m/z:              | System.Collections. |
| Charge:           | System.Collections. |
| Retentiontime:    | System.Collections. |
| Score:            | 109.7213            |
| Mass Error [ppm]: | 0.021581            |
| PEP:              | 4.5736E-05          |
| Precursor Type:   | MULTI               |

**general information**

|                       |             |
|-----------------------|-------------|
| Annotation:           | 8 of 11     |
| AminoAcids Coverage:  | 73 %        |
| Intensity Coverage:   | 53 %        |
| Protein Localisation: | 540 ... 550 |

| b ion        |                |    |     |    |                | gamma ion  |  |
|--------------|----------------|----|-----|----|----------------|------------|--|
| delta dalton | mass           |    | seq |    | delta dalton   | mass       |  |
|              | 116.034219499  | 1  | D   | 10 |                |            |  |
| +0.1420095   | 217.081897973  | 2  | T   | 9  | 1181.575153065 | -0.1761052 |  |
| +0.1353021   | 316.150311889  | 3  | V   | 8  | 1080.527474591 | +0.240958  |  |
|              | 479.213640427  | 4  | Y   | 7  | 981.459060674  | +0.0065765 |  |
|              | 550.250754215  | 5  | A   | 6  | 818.395732136  | +0.1153763 |  |
| +0.1882879   | 678.309331726  | 6  | Q   | 5  | 747.358618348  |            |  |
|              | 765.341360136  | 7  | S   | 4  | 619.300040837  | +0.0957722 |  |
| +0.0631013   | 878.425424117  | 8  | I   | 3  | 532.268012427  |            |  |
| -0.098774    | 979.473102591  | 9  | T   | 2  | 419.183948447  |            |  |
|              | 1146.471461409 | 10 | S   | 1  | 318.136269973  |            |  |
|              |                | 11 | K   | 0  | 151.137911154  |            |  |

Source: 20120514\_VR\_Bsu\_TripleSILACrep1\_pL2ESLS\_F19  
 Scannumber: 7753  
 Protein: BSU30650; dps; ytkB  
 Peptide Score: 87.67  
 Method: ITMS; CID; 3

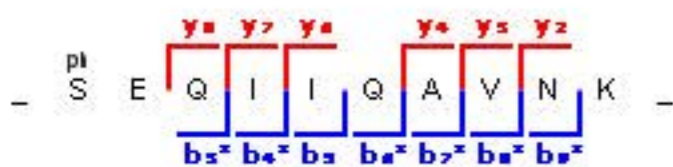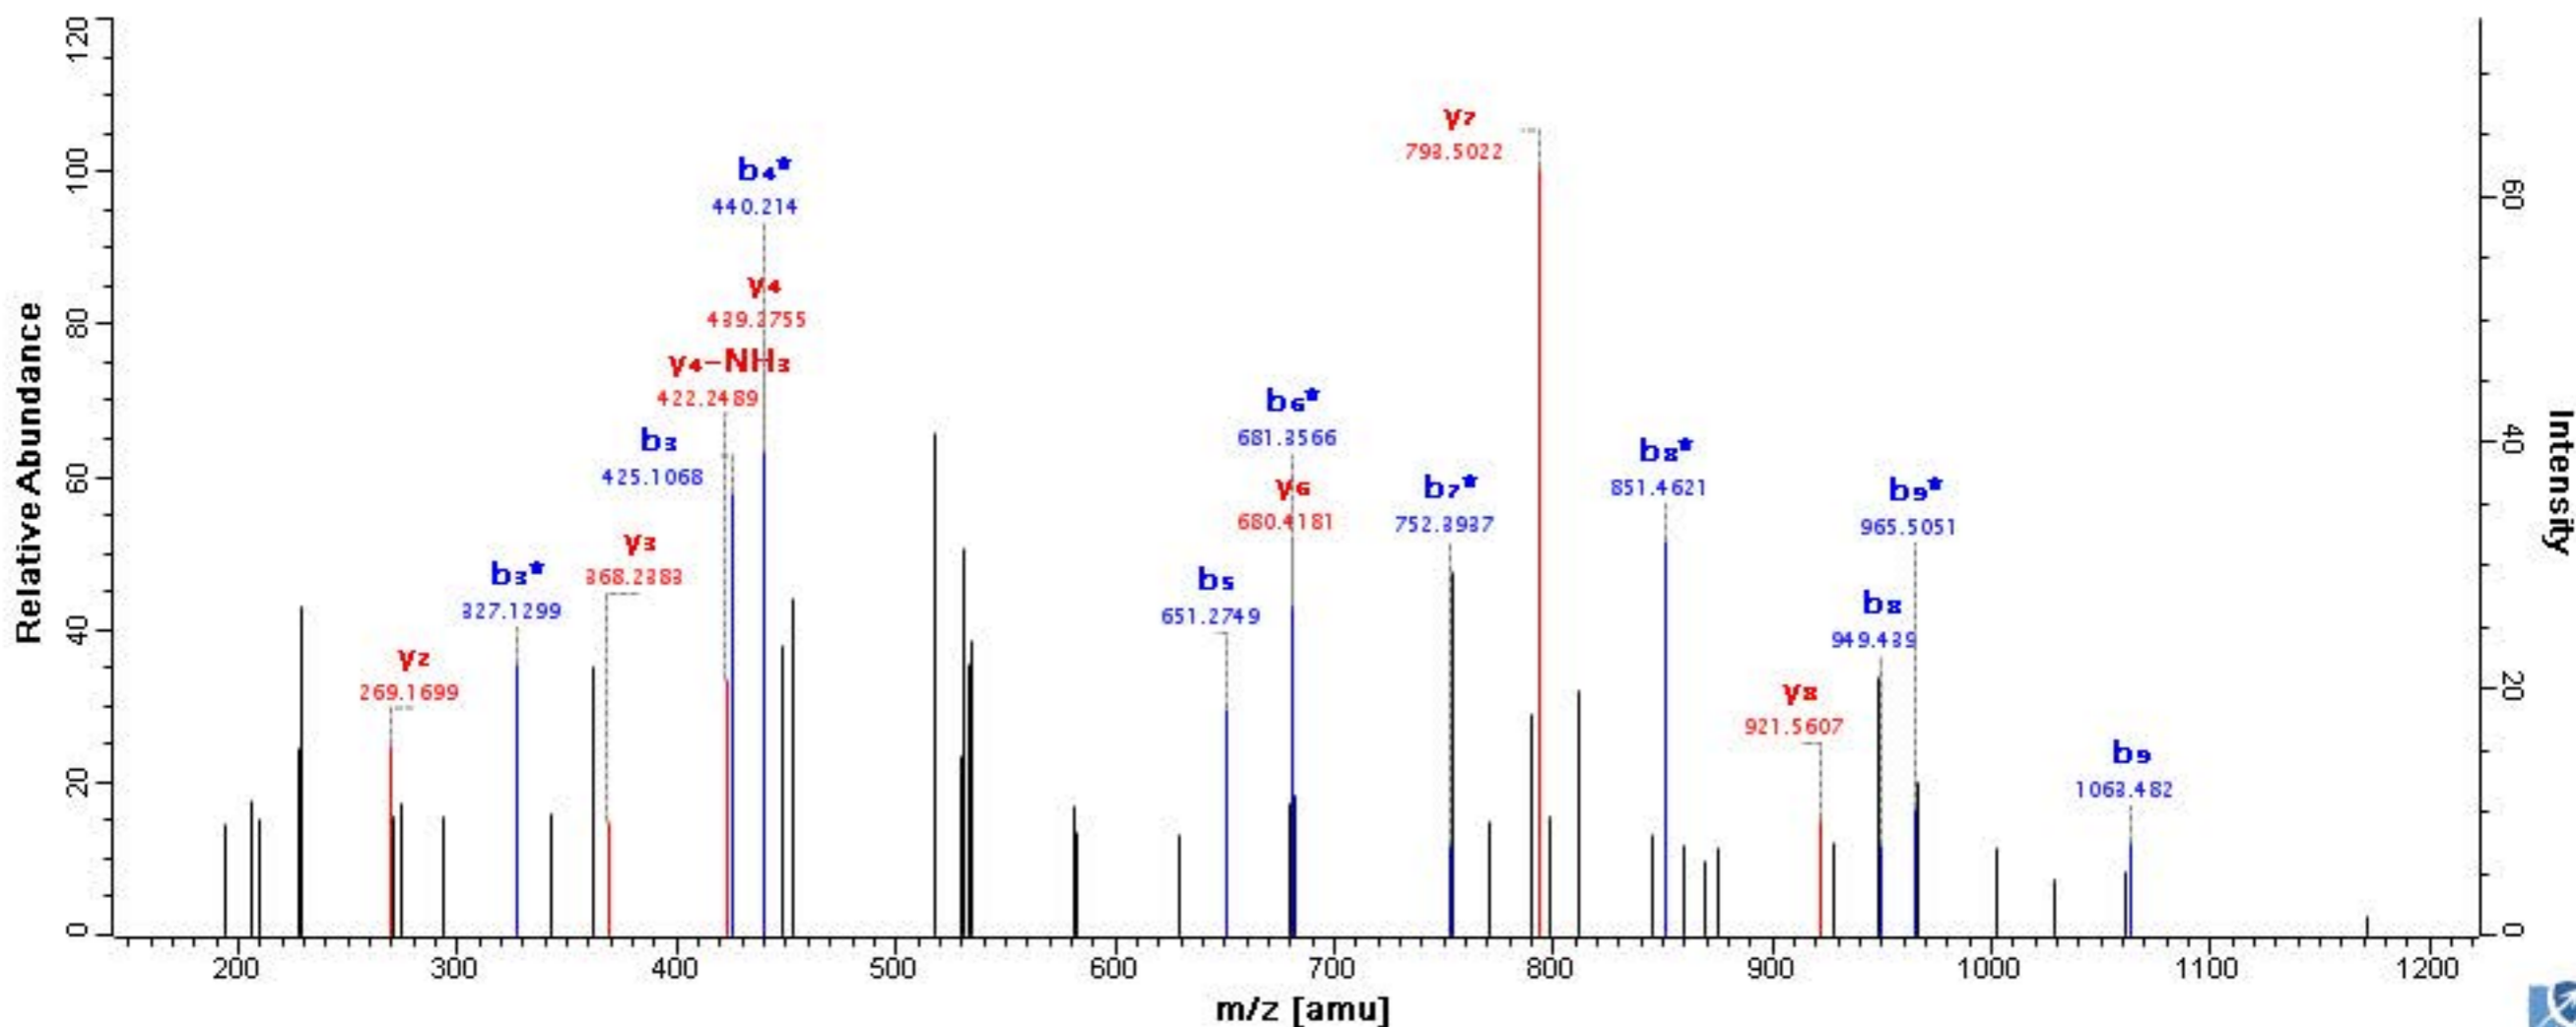

#### precursor information

|                   |                     |
|-------------------|---------------------|
| Mass:             | 1208.57958          |
| m/z:              | System.Collections. |
| Charge:           | System.Collections. |
| Retentiontime:    | System.Collections. |
| Score:            | 87.66729            |
| Mass Error [ppm]: | -0.52741            |
| PEP:              | 0.0081312           |
| Precursor Type:   | MULTI               |

#### general information

|                       |          |
|-----------------------|----------|
| Annotation:           | 8 of 10  |
| AminoAcids Coverage:  | 80 %     |
| Intensity Coverage:   | 40 %     |
| Protein Localisation: | 2 ... 11 |

| b ion      |                |    |     |   |                | y ion      |  |
|------------|----------------|----|-----|---|----------------|------------|--|
| Δ dalton   | mass           |    | seq |   | Δ dalton       | mass       |  |
|            | 168.005635285  | 1  | S   | 9 |                |            |  |
|            | 297.048228381  | 2  | E   | 8 | 1050.603334215 |            |  |
| +0.1818904 | 425.106805892  | 3  | Q   | 7 | 921.560741119  | +0.312794  |  |
|            | 538.190869873  | 4  | I   | 6 | 793.502163607  | +0.1033662 |  |
| +0.0509939 | 651.274933853  | 5  | I   | 5 | 680.418099627  | +0.0284946 |  |
|            | 779.333511365  | 6  | Q   | 4 | 567.334035646  |            |  |
|            | 850.370625152  | 7  | A   | 3 | 439.275458135  | +0.0433895 |  |
| +0.0490591 | 949.439039069  | 8  | V   | 2 | 368.238344347  | +0.2047099 |  |
| -0.1169763 | 1063.481966516 | 9  | N   | 1 | 269.169930431  | +0.1797095 |  |
|            |                | 10 | K   | 0 | 155.127002984  |            |  |

Source: 20120514\_VR\_Bsu\_TripleSILACrep1\_pL2ESLS\_F19  
 Scannumber: 7858  
 Protein: BSU04400; gsiB  
 Peptide Score: 89.08  
 Method: ITMS; CID; 3

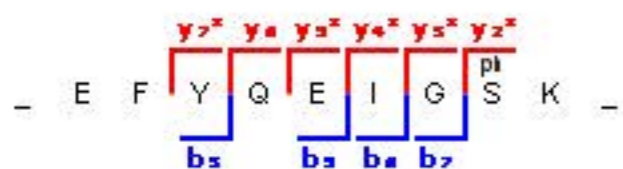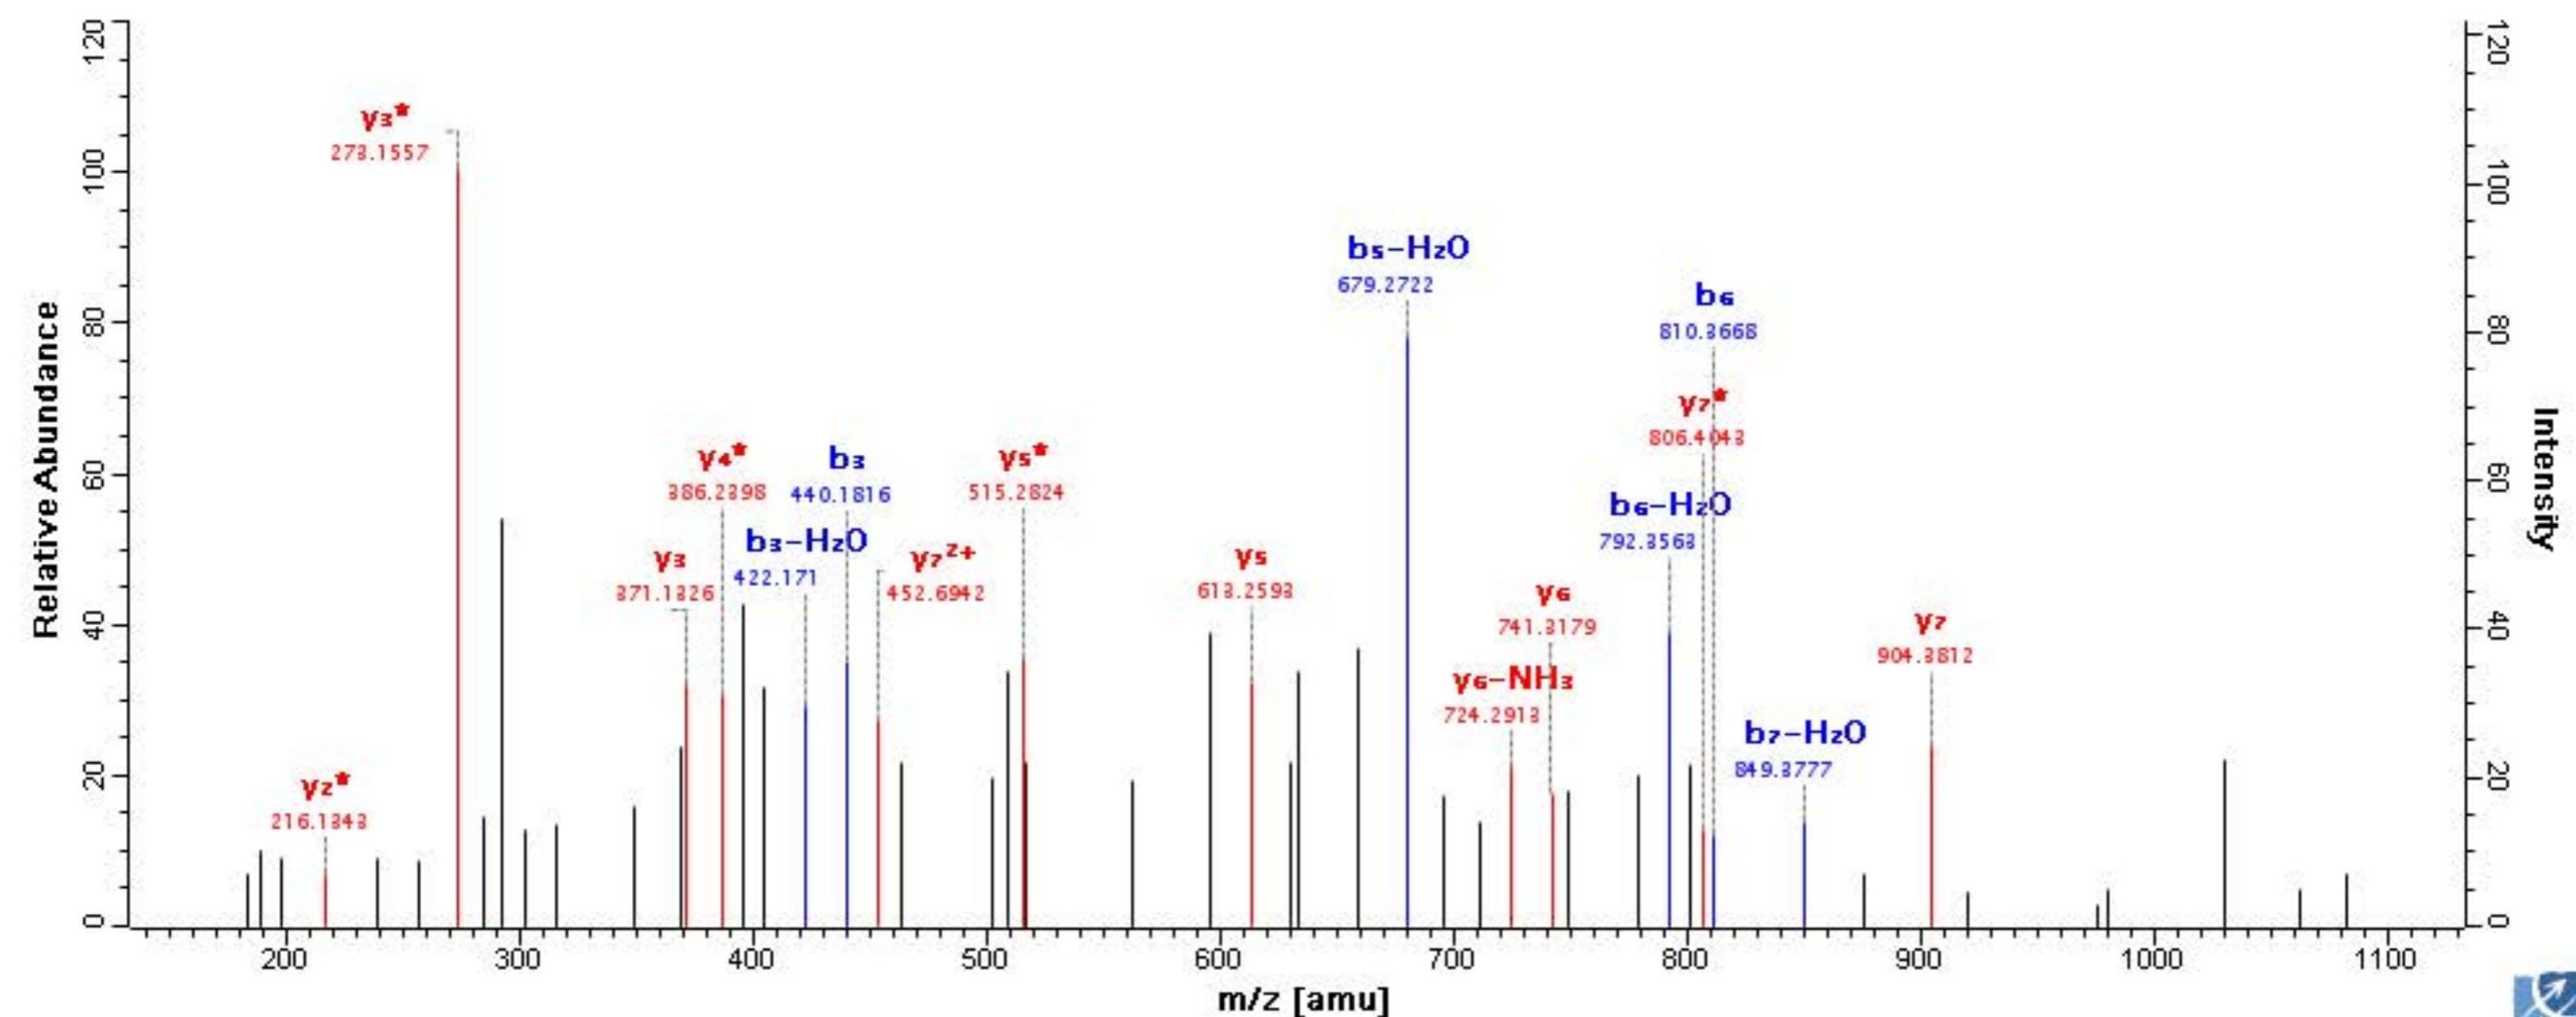

#### precursor information

|                       |                     |
|-----------------------|---------------------|
| Mass:                 | 1179.4856           |
| m/z:                  | System.Collections. |
| Charge:               | System.Collections. |
| Retentiontime:        | System.Collections. |
| Score:                | 89.07951            |
| Mass Error [ppm]:     | 0.57952             |
| PEP:                  | 0.010754            |
| g Precursor Type:     | MULTI               |
| Annotation:           | 6 of 9              |
| AminoAcids Coverag    | 67 %                |
| Intensity Coverage:   | 46 %                |
| Protein Localisation: | 107 ... 115         |

| b ion      |              |   |     |   | γ ion        |            | γ <sup>2+</sup> ion |            |
|------------|--------------|---|-----|---|--------------|------------|---------------------|------------|
| Δ dalton   | mass         |   | seq |   | Δ dalton     | mass       | Δ dalton            | mass       |
|            | 130.04986956 | 1 | E   | 8 |              |            |                     |            |
|            | 277.11828348 | 2 | F   | 7 | 1051.4496038 |            | 1051.4496038        |            |
| +0.1474285 | 440.18161202 | 3 | Y   | 6 | 904.38118984 | +0.1888785 | 452.69423315        | +0.2702444 |
|            | 568.24018953 | 4 | Q   | 5 | 741.3178613  | +0.2836402 | 741.3178613         |            |
|            | 697.28278262 | 5 | E   | 4 | 613.25928379 | +0.3308041 | 613.25928379        |            |
| -0.0454965 | 810.36684661 | 6 | I   | 3 | 484.21669069 |            | 484.21669069        |            |
|            | 867.38831033 | 7 | G   | 2 | 371.13262671 | -0.0837376 | 371.13262671        |            |
|            | 1034.3866691 | 8 | S   | 1 | 314.11116299 |            | 314.11116299        |            |
|            |              | 9 | K   | 0 | 147.11280417 |            | 147.11280417        |            |

Source: 20120514\_VR\_Bsu\_TripleSILACrep1\_pL2ESLS\_F19  
 Scannumber: 9799  
 Protein: BSU01770; glmM; ybbT  
 Peptide Score: 147.17  
 Method: ITMS; CID; 3

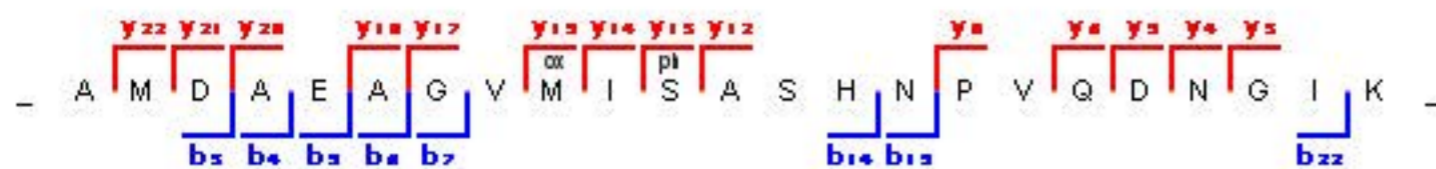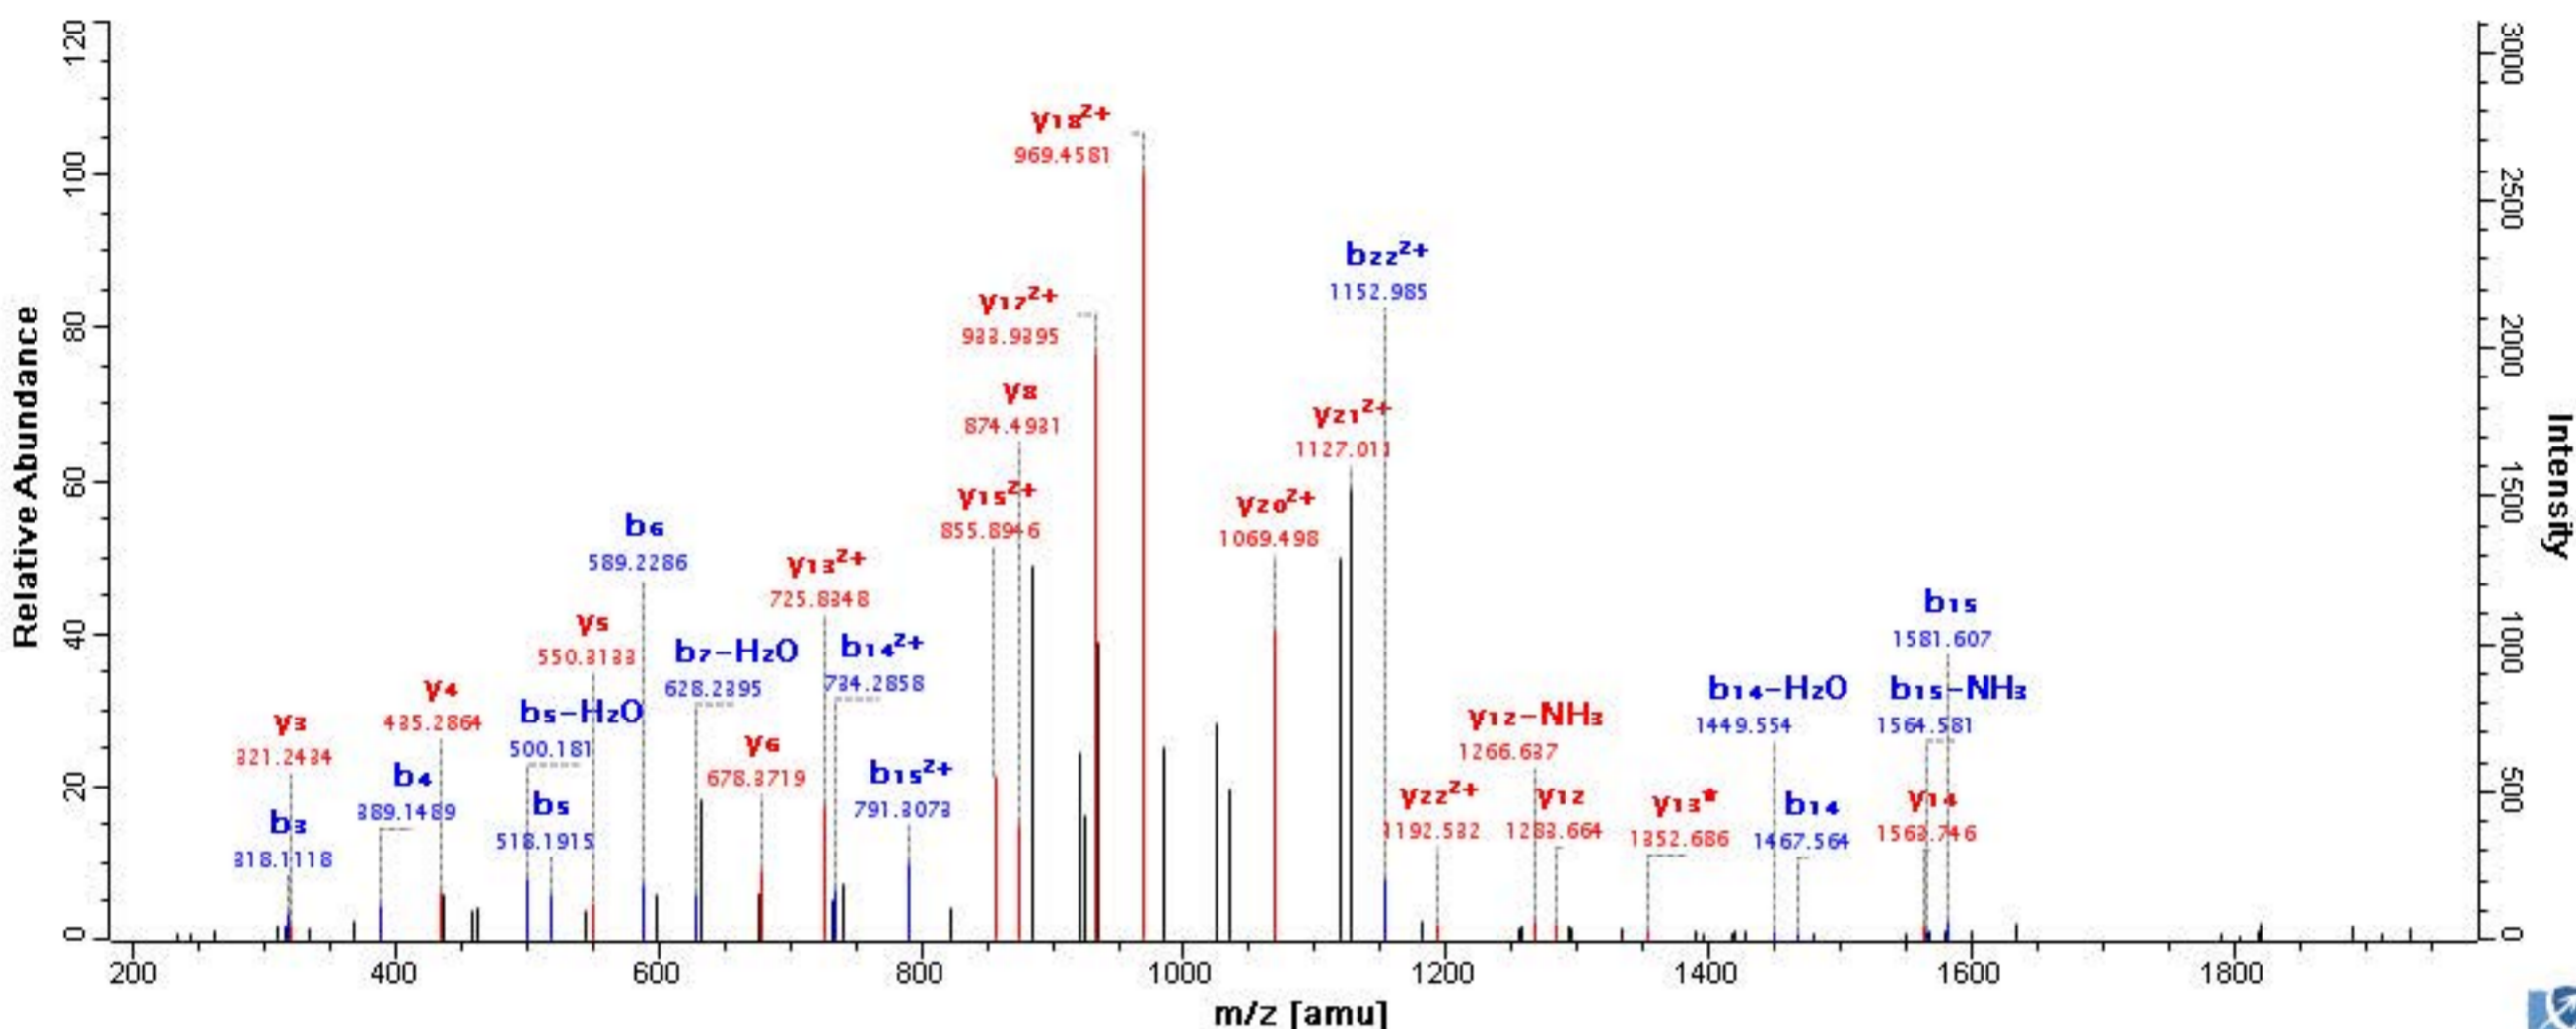

#### precursor information

|                   |                     |
|-------------------|---------------------|
| Mass:             | 2450.06073          |
| m/z:              | System.Collections. |
| Charge:           | System.Collections. |
| Retentiontime:    | System.Collections. |
| Score:            | 147.1689            |
| Mass Error [ppm]: | 0.0014625           |
| PEP:              | 9.3059E-28          |
| Precursor Type:   | MULTI               |

| b <sup>2+</sup> ion |          | b ion     |          |    |     |    | y ion    |           | y <sup>2+</sup> ion |           |
|---------------------|----------|-----------|----------|----|-----|----|----------|-----------|---------------------|-----------|
| Δ dalton            | mass     | Δ dalton  | mass     |    | seq |    | Δ dalton | mass      | Δ dalton            | mass      |
|                     | 72.04439 |           | 72.04439 | 1  | A   | 22 |          |           |                     |           |
|                     | 203.0849 |           | 203.0849 | 2  | M   | 21 | 2384.056 |           | 1192.532            | +0.099224 |
|                     | 318.1118 | -0.091524 | 318.1118 | 3  | D   | 20 | 2253.016 |           | 1127.011            | -0.076334 |
|                     | 389.1489 | -0.127142 | 389.1489 | 4  | A   | 19 | 2137.989 |           | 1069.498            | +0.328861 |
|                     | 518.1915 | +0.100101 | 518.1915 | 5  | E   | 18 | 2066.951 |           | 2066.951            |           |
|                     | 589.2286 | +0.023559 | 589.2286 | 6  | A   | 17 | 1937.909 |           | 969.4581            | +0.318848 |
|                     | 646.2501 |           | 646.2501 | 7  | G   | 16 | 1866.872 |           | 933.9395            | -0.035397 |
|                     | 745.3185 |           | 745.3185 | 8  | V   | 15 | 1809.85  |           | 1809.85             |           |
|                     | 892.3539 |           | 892.3539 | 9  | M   | 14 | 1710.782 |           | 855.8946            | +0.194966 |
|                     | 1005.438 |           | 1005.438 | 10 | I   | 13 | 1563.746 | +0.107779 | 1563.746            |           |
|                     | 1172.436 |           | 1172.436 | 11 | S   | 12 | 1450.662 |           | 725.8348            | +0.184813 |
|                     | 1243.473 |           | 1243.473 | 12 | A   | 11 | 1283.664 | +0.223039 | 1283.664            |           |
|                     | 1330.505 |           | 1330.505 | 13 | S   | 10 | 1212.627 |           | 1212.627            |           |
| -0.382575           | 734.2858 | -0.032044 | 1467.564 | 14 | H   | 9  | 1125.595 |           | 1125.595            |           |
| -0.034044           | 791.3073 | +0.260112 | 1581.607 | 15 | N   | 8  | 988.536  |           | 988.536             |           |
|                     | 1678.66  |           | 1678.66  | 16 | P   | 7  | 874.4931 | +0.087075 | 874.4931            |           |
|                     | 1777.728 |           | 1777.728 | 17 | V   | 6  | 777.4403 |           | 777.4403            |           |
|                     | 1905.787 |           | 1905.787 | 18 | Q   | 5  | 678.3719 | +0.148621 | 678.3719            |           |
|                     | 2020.814 |           | 2020.814 | 19 | D   | 4  | 550.3133 | -0.215836 | 550.3133            |           |
|                     | 2134.857 |           | 2134.857 | 20 | N   | 3  | 435.2864 | +0.088267 | 435.2864            |           |
|                     | 2191.878 |           | 2191.878 | 21 | G   | 2  | 321.2434 | -0.2276   | 321.2434            |           |
| +0.000599           | 1152.985 |           | 2304.962 | 22 | I   | 1  | 264.222  |           | 264.222             |           |
|                     |          |           |          | 23 | K   | 0  | 151.1379 |           | 151.1379            |           |

#### general information

|                       |            |
|-----------------------|------------|
| Annotation:           | 19 of 23   |
| AminoAcids Coverage:  | 83 %       |
| Intensity Coverage:   | 48 %       |
| Protein Localisation: | 88 ... 110 |

Source: 20120514\_VR\_Bsu\_TripleSILACrep1\_pL2ESLS\_F20  
 Scannumber: 11003  
 Protein: asd; BSU16750  
 Peptide Score: 128.14  
 Method: ITMS; CID; 3

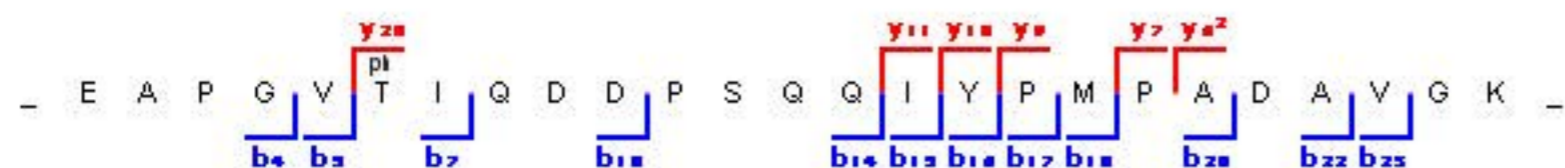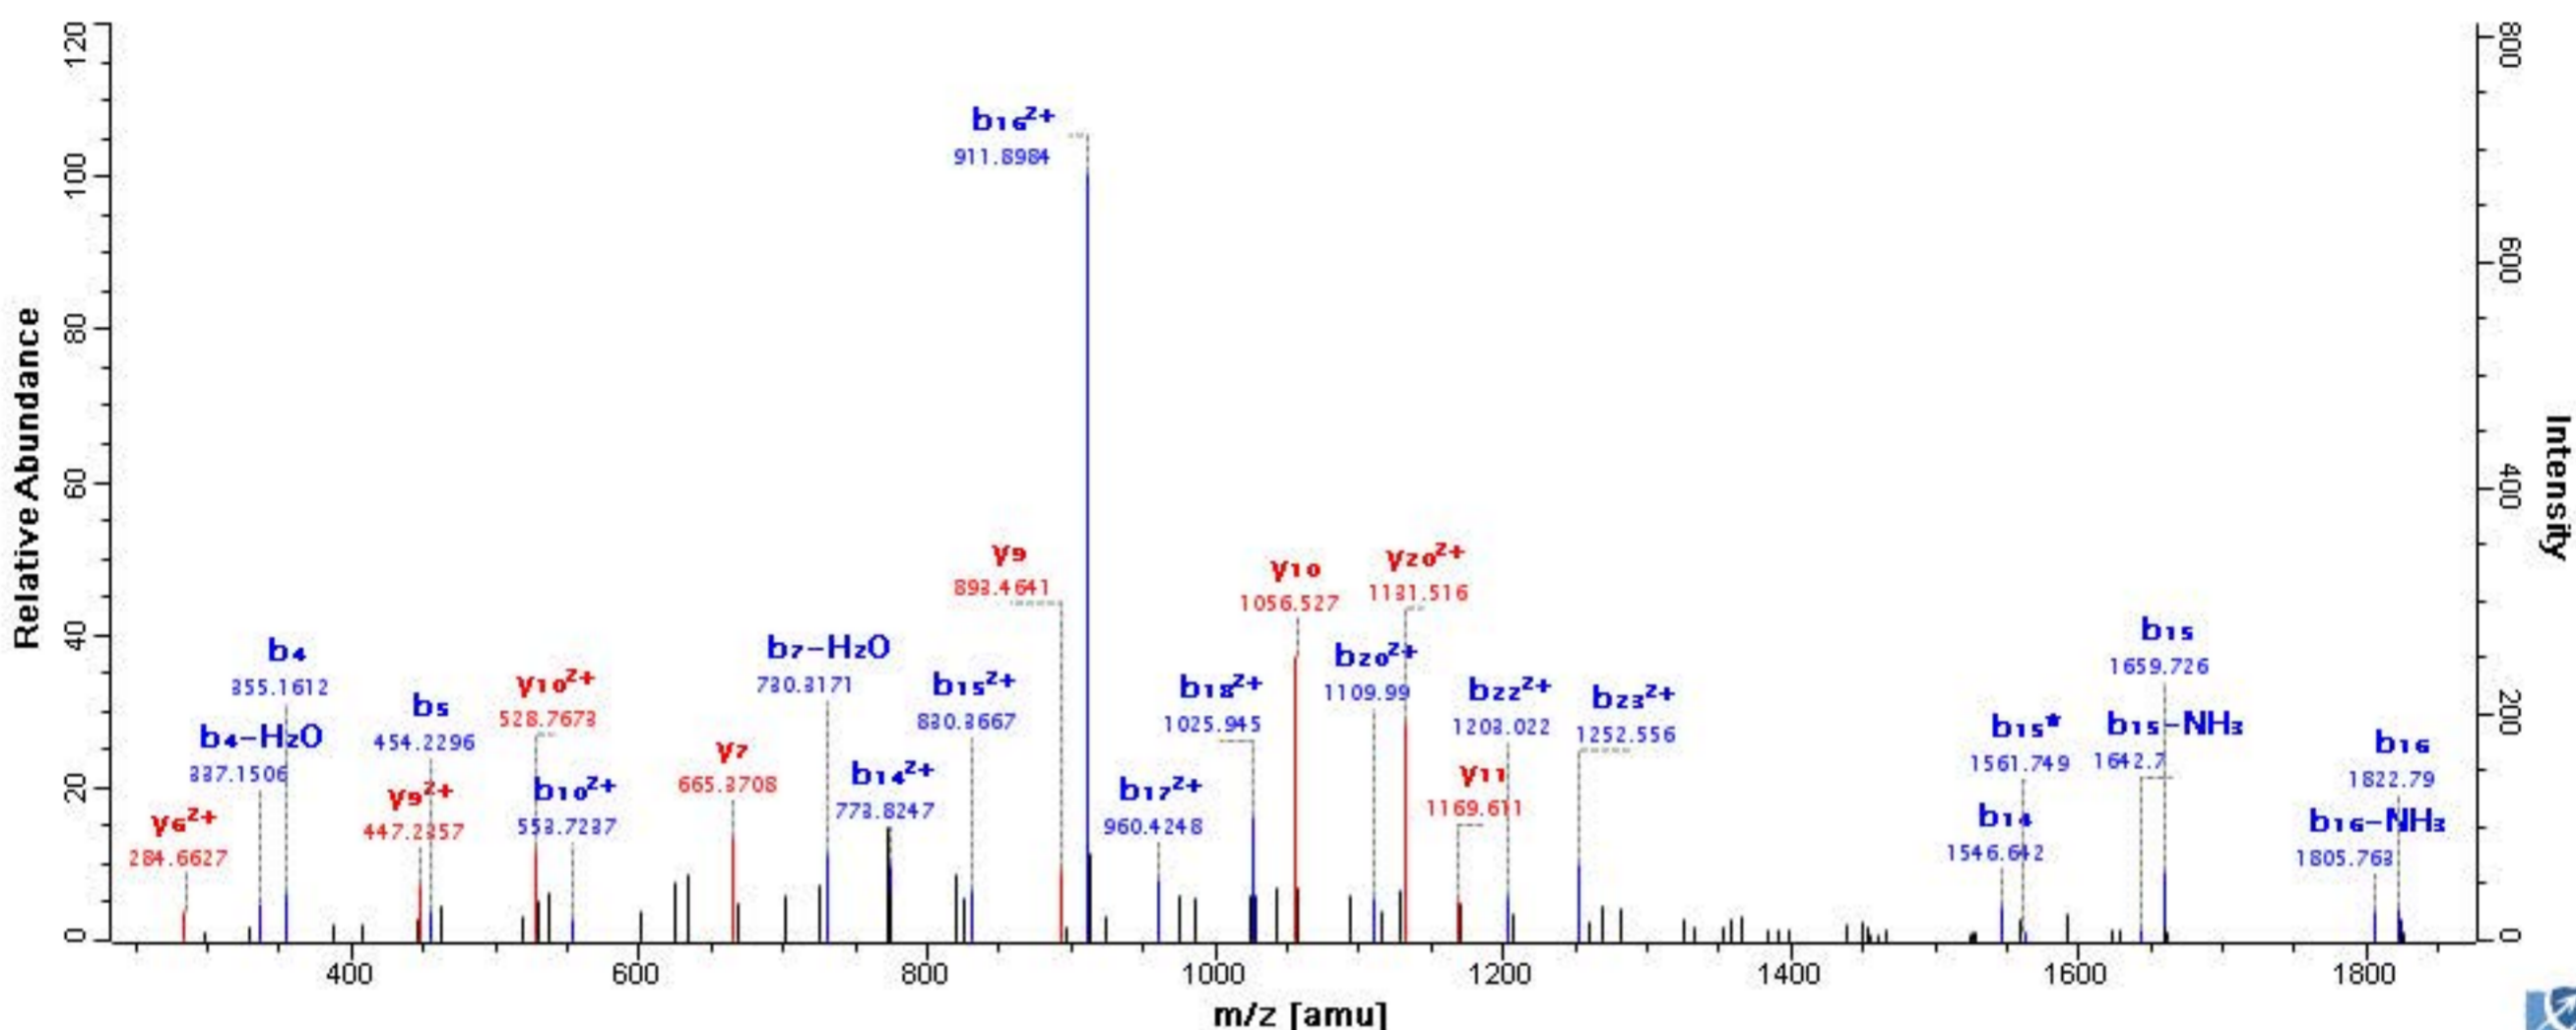

#### precursor information

|                   |                     |
|-------------------|---------------------|
| Mass:             | 2706.22512          |
| m/z:              | System.Collections. |
| Charge:           | System.Collections. |
| Retentiontime:    | System.Collections. |
| Score:            | 128.1398            |
| Mass Error [ppm]: | 0.11445             |
| PEP:              | 4.863E-18           |
| Precursor Type:   | MULTI               |

#### general information

|                       |             |
|-----------------------|-------------|
| Annotation:           | 15 of 25    |
| AminoAcids Coverage:  | 60 %        |
| Intensity Coverage:   | 58 %        |
| Protein Localisation: | 274 ... 298 |

| b <sup>2+</sup> ion |          | b ion     |          |     | y ion |          | y <sup>2+</sup> ion |           |                    |
|---------------------|----------|-----------|----------|-----|-------|----------|---------------------|-----------|--------------------|
| Δ dalton            | mass     | Δ dalton  | mass     | seq |       | Δ dalton | mass                | Δ dalton  | mass               |
|                     | 130.0499 |           | 130.0499 | 1   | E     | 24       |                     |           |                    |
|                     | 201.087  |           | 201.087  | 2   | A     | 23       | 2586.204            |           | 2586.204           |
|                     | 298.1397 |           | 298.1397 | 3   | P     | 22       | 2515.167            |           | 2515.167           |
|                     | 355.1612 | +0.09355  | 355.1612 | 4   | G     | 21       | 2418.114            |           | 2418.114           |
|                     | 454.2296 | +0.167531 | 454.2296 | 5   | V     | 20       | 2361.092            |           | 2361.092           |
|                     | 635.2436 |           | 635.2436 | 6   | T     | 19       | 2262.024            |           | 1131.516 +0.266496 |
|                     | 748.3277 |           | 748.3277 | 7   | I     | 18       | 2081.01             |           | 2081.01            |
|                     | 876.3863 |           | 876.3863 | 8   | Q     | 17       | 1967.926            |           | 1967.926           |
|                     | 991.4132 |           | 991.4132 | 9   | D     | 16       | 1839.867            |           | 1839.867           |
| +0.042028           | 553.7237 |           | 1106.44  | 10  | D     | 15       | 1724.84             |           | 1724.84            |
|                     | 1203.493 |           | 1203.493 | 11  | P     | 14       | 1609.813            |           | 1609.813           |
|                     | 1290.525 |           | 1290.525 | 12  | S     | 13       | 1512.761            |           | 1512.761           |
|                     | 1418.584 |           | 1418.584 | 13  | Q     | 12       | 1425.729            |           | 1425.729           |
| -0.056199           | 773.8247 | -0.006    | 1546.642 | 14  | Q     | 11       | 1297.67             |           | 1297.67            |
| +0.314977           | 830.3667 | -0.098487 | 1659.726 | 15  | I     | 10       | 1169.611            | -0.352057 | 1169.611           |
| +0.165149           | 911.8984 | +0.055958 | 1822.79  | 16  | Y     | 9        | 1056.527            | -0.175952 | 528.7673 +0.039795 |
| +0.003208           | 960.4248 |           | 1919.842 | 17  | P     | 8        | 893.4641            | -0.012281 | 447.2357 -0.009169 |
| +0.454523           | 1025.945 |           | 2050.883 | 18  | M     | 7        | 796.4113            |           | 796.4113           |
|                     | 2147.936 |           | 2147.936 | 19  | P     | 6        | 665.3708            | +0.089268 | 665.3708           |
| -0.217491           | 1109.99  |           | 2218.973 | 20  | A     | 5        | 568.3181            |           | 284.6627 -0.395208 |
|                     | 2334     |           | 2334     | 21  | D     | 4        | 497.2809            |           | 497.2809           |
| -0.11158            | 1203.022 |           | 2405.037 | 22  | A     | 3        | 382.254             |           | 382.254            |
| +0.156948           | 1252.556 |           | 2504.105 | 23  | V     | 2        | 311.2169            |           | 311.2169           |
|                     | 2561.127 |           | 2561.127 | 24  | G     | 1        | 212.1485            |           | 212.1485           |
|                     |          |           |          | 25  | K     | 0        | 155.127             |           | 155.127            |

Source: 20120514\_VR\_Bsu\_TripleSILACrep1\_pL2ESLS\_F20  
 Scannumber: 11184  
 Protein: BSU28090; valS  
 Peptide Score: 237.48  
 Method: ITMS; CID; 3

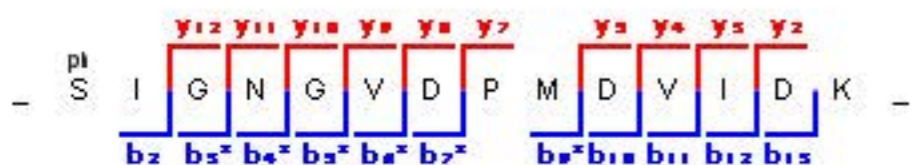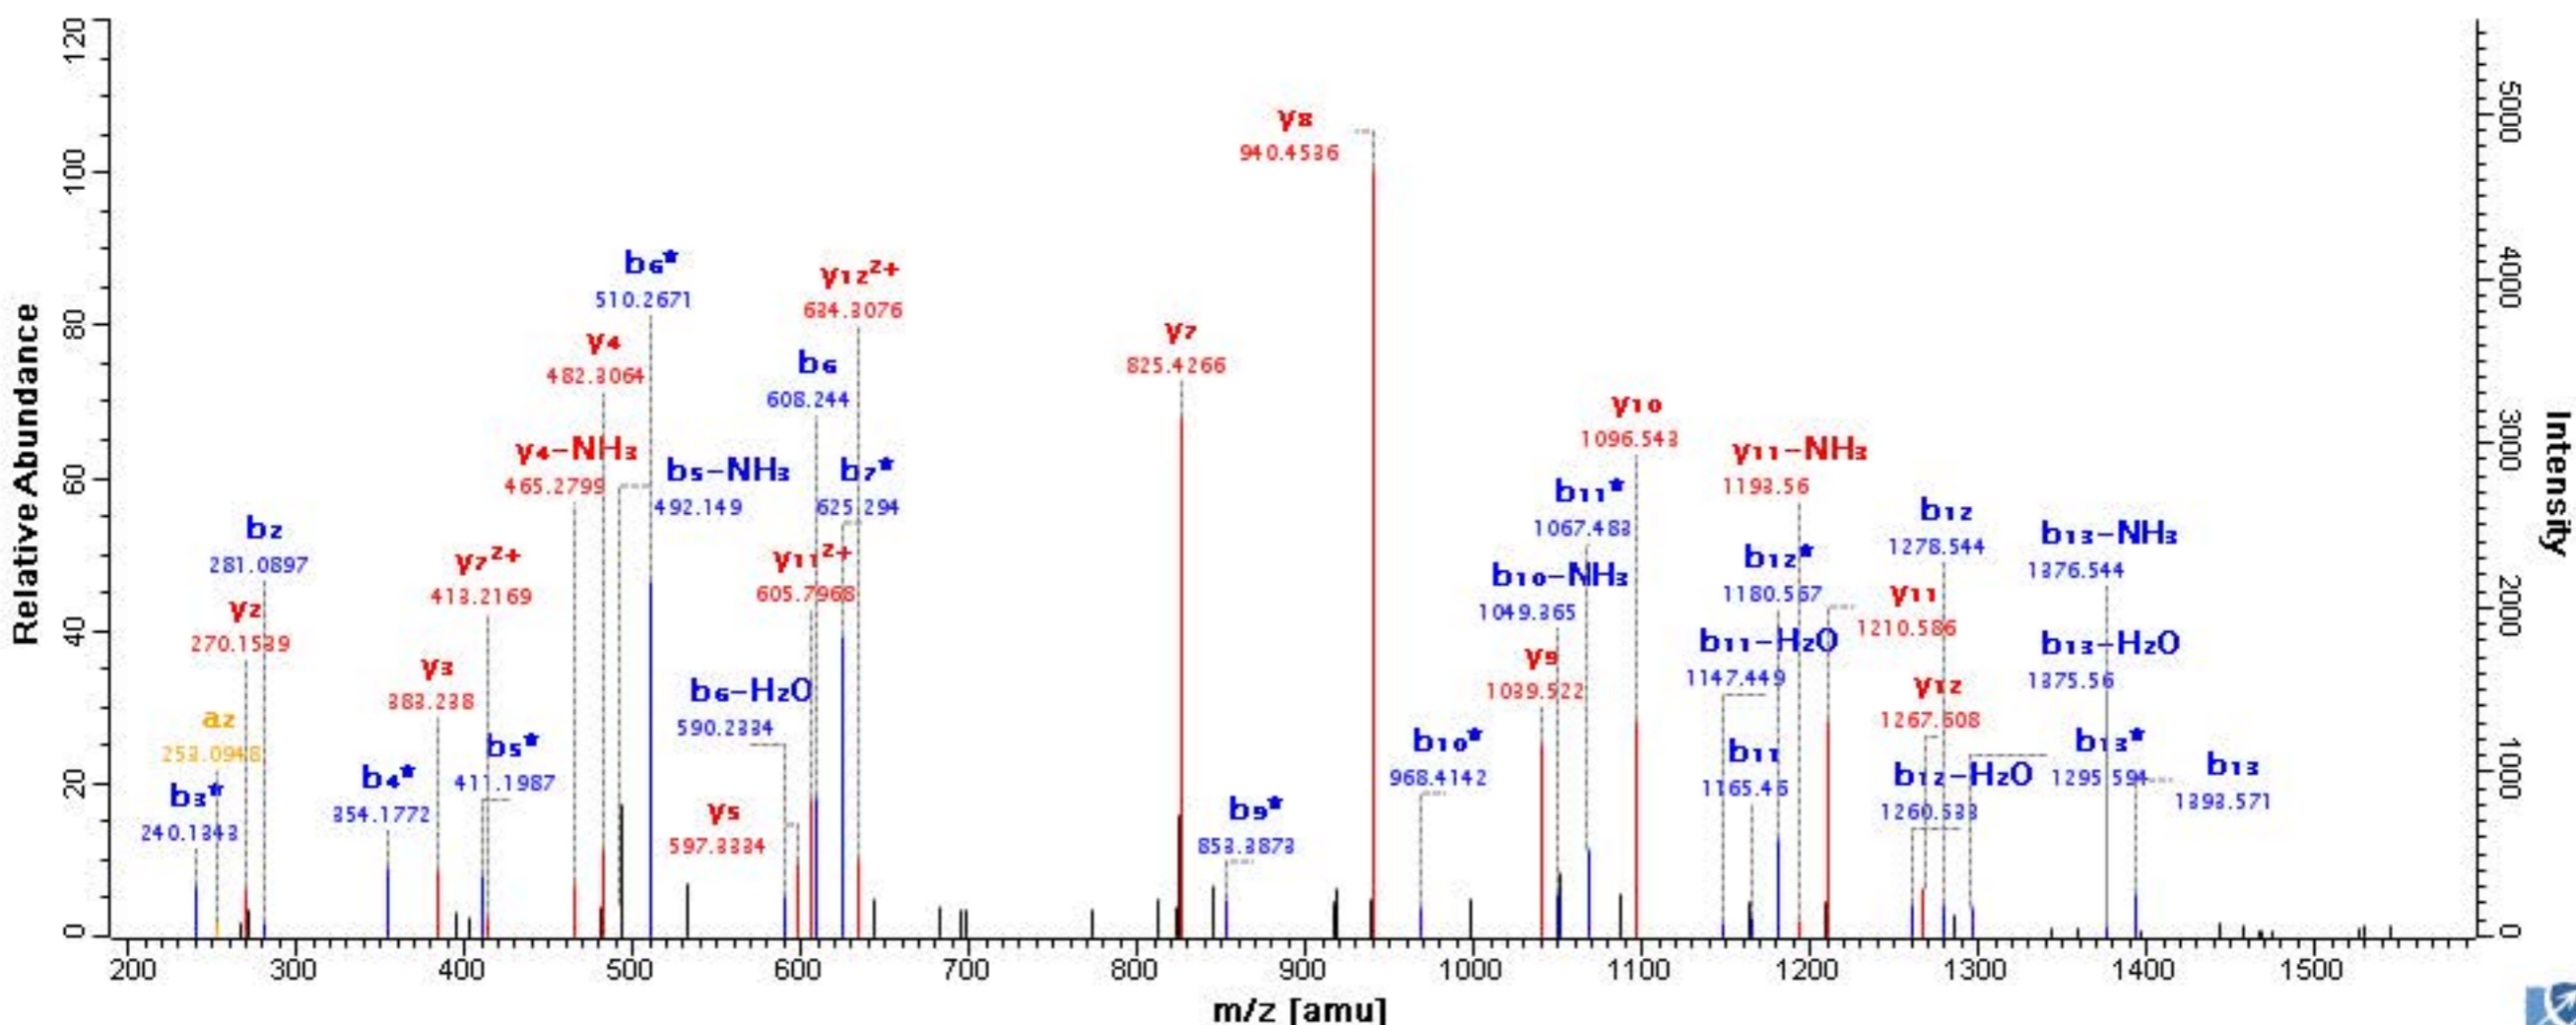

#### precursor information

|                   |                     |
|-------------------|---------------------|
| Mass:             | 1538.66802          |
| m/z:              | System.Collections. |
| Charge:           | System.Collections. |
| Retentiontime:    | System.Collections. |
| Score:            | 237.4787            |
| Mass Error [ppm]: | -0.48988            |
| PEP:              | 1.1222E-89          |
| Precursor Type:   | MULTI               |

#### general information

|                       |             |
|-----------------------|-------------|
| Annotation:           | 12 of 14    |
| AminoAcids Coverage:  | 86 %        |
| Intensity Coverage:   | 77 %        |
| Protein Localisation: | 529 ... 542 |

| a ion     |          | b ion     |          | seq      |      |          | y ion    |           | y <sup>2+</sup> ion |           |
|-----------|----------|-----------|----------|----------|------|----------|----------|-----------|---------------------|-----------|
| Δ dalton  | mass     | Δ dalton  | mass     | Δ dalton | mass | Δ dalton | mass     | Δ dalton  | mass                |           |
|           | 140.0107 |           | 168.0056 | 1        | S    | 13       |          |           |                     |           |
| +0.130466 | 253.0948 | +0.092674 | 281.0897 | 2        | I    | 12       | 1380.692 |           | 1380.692            |           |
|           | 310.1162 |           | 338.1112 | 3        | G    | 11       | 1267.608 | -0.141641 | 634.3076            | -0.175472 |
|           | 424.1592 |           | 452.1541 | 4        | N    | 10       | 1210.586 | +0.118959 | 605.7968            | +0.118646 |
|           | 481.1806 |           | 509.1756 | 5        | G    | 9        | 1096.543 | +0.158224 | 1096.543            |           |
|           | 580.2491 | +0.078969 | 608.244  | 6        | V    | 8        | 1039.522 | +0.128174 | 1039.522            |           |
|           | 695.276  |           | 723.2709 | 7        | D    | 7        | 940.4536 | +0.086786 | 940.4536            |           |
|           | 792.3288 |           | 820.3237 | 8        | P    | 6        | 825.4266 | +0.214925 | 413.2169            | +0.118808 |
|           | 923.3692 |           | 951.3642 | 9        | M    | 5        | 728.3739 |           | 728.3739            |           |
|           | 1038.396 |           | 1066.391 | 10       | D    | 4        | 597.3334 | +0.071662 | 597.3334            |           |
|           | 1137.465 | +0.088335 | 1165.46  | 11       | V    | 3        | 482.3064 | -0.034268 | 482.3064            |           |
|           | 1250.549 | +0.135253 | 1278.544 | 12       | I    | 2        | 383.238  | +0.133999 | 383.238             |           |
|           | 1365.576 | +0.208407 | 1393.571 | 13       | D    | 1        | 270.1539 | +0.086105 | 270.1539            |           |
|           |          |           |          | 14       | K    | 0        | 155.127  |           | 155.127             |           |

Source: 20120514\_VR\_Bsu\_TripleSILACrep1\_pL2ESLS\_F20  
 Scannumber: 11390  
 Protein: BSU03130; nadE; outB  
 Peptide Score: 108.5  
 Method: ITMS; CID; 3

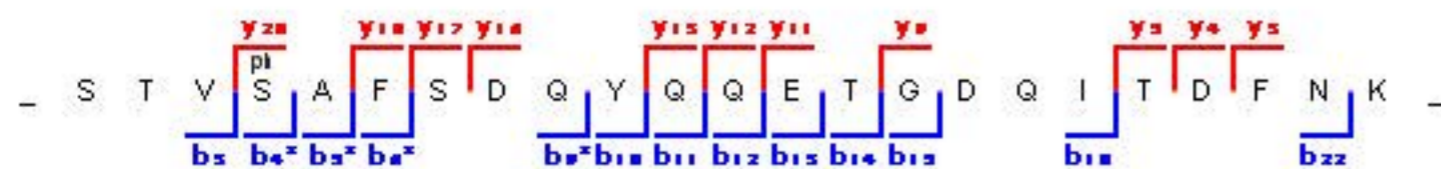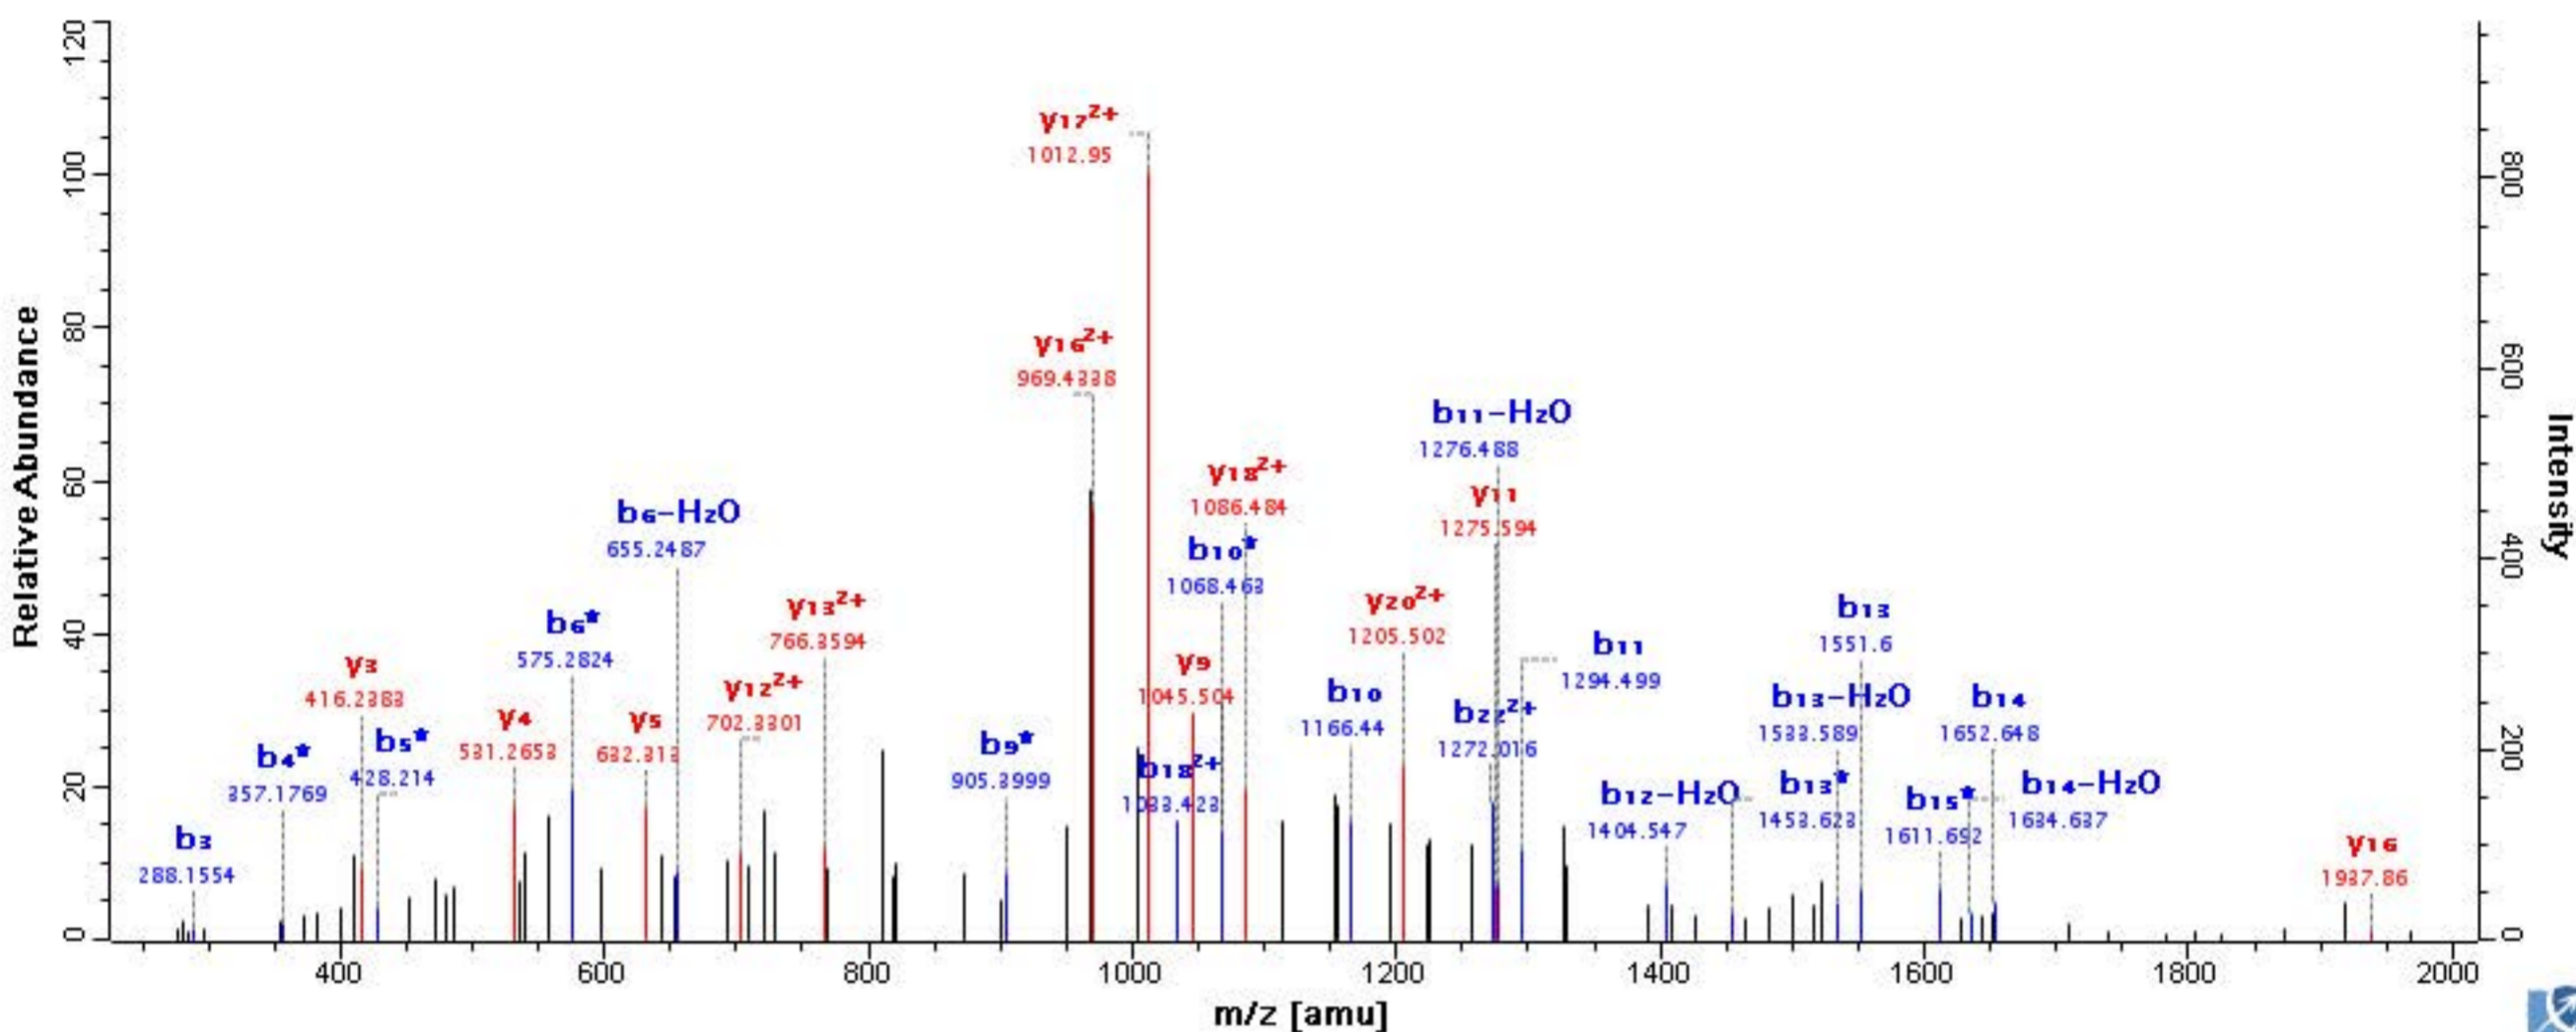

#### precursor information

|                   |                     |
|-------------------|---------------------|
| Mass:             | 2696.13935          |
| m/z:              | System.Collections. |
| Charge:           | System.Collections. |
| Retentiontime:    | System.Collections. |
| Score:            | 108.495             |
| Mass Error [ppm]: | 0.85509             |
| PEP:              | 4.1463E-07          |
| Precursor Type:   | ISO                 |

| b <sup>2+</sup> ion |          | b ion     |          |     |   | y ion    |          | y <sup>2+</sup> ion |                    |
|---------------------|----------|-----------|----------|-----|---|----------|----------|---------------------|--------------------|
| Δ dalton            | mass     | Δ dalton  | mass     | seq |   | Δ dalton | mass     | Δ dalton            | mass               |
|                     | 88.0393  |           | 88.0393  | 1   | S | 22       |          |                     |                    |
|                     | 189.087  |           | 189.087  | 2   | T | 21       | 2610.112 |                     | 2610.112           |
|                     | 288.1554 | -0.035311 | 288.1554 | 3   | V | 20       | 2509.065 |                     | 2509.065           |
|                     | 455.1538 |           | 455.1538 | 4   | S | 19       | 2409.996 |                     | 1205.502 +0.447234 |
|                     | 526.1909 |           | 526.1909 | 5   | A | 18       | 2242.998 |                     | 2242.998           |
|                     | 673.2593 |           | 673.2593 | 6   | F | 17       | 2171.961 |                     | 1086.484 +0.151982 |
|                     | 760.2913 |           | 760.2913 | 7   | S | 16       | 2024.892 |                     | 1012.95 -0.085112  |
|                     | 875.3183 |           | 875.3183 | 8   | D | 15       | 1937.86  | +0.337342           | 969.4338 +0.139947 |
|                     | 1003.377 |           | 1003.377 | 9   | Q | 14       | 1822.833 |                     | 1822.833           |
|                     | 1166.44  | +0.02041  | 1166.44  | 10  | Y | 13       | 1694.775 |                     | 1694.775           |
|                     | 1294.499 | +0.222331 | 1294.499 | 11  | Q | 12       | 1531.711 |                     | 766.3594 -0.030013 |
|                     | 1422.557 |           | 1422.557 | 12  | Q | 11       | 1403.653 |                     | 702.3301 +0.195504 |
|                     | 1551.6   | +0.324773 | 1551.6   | 13  | E | 10       | 1275.594 | +0.320143           | 1275.594           |
|                     | 1652.648 | +0.368403 | 1652.648 | 14  | T | 9        | 1146.552 |                     | 1146.552           |
|                     | 1709.669 |           | 1709.669 | 15  | G | 8        | 1045.504 | +0.09059            | 1045.504           |
|                     | 1824.696 |           | 1824.696 | 16  | D | 7        | 988.4826 |                     | 988.4826           |
|                     | 1952.755 |           | 1952.755 | 17  | Q | 6        | 873.4556 |                     | 873.4556           |
| +0.234026           | 1033.423 |           | 2065.839 | 18  | I | 5        | 745.397  |                     | 745.397            |
|                     | 2166.886 |           | 2166.886 | 19  | T | 4        | 632.313  | +0.037437           | 632.313            |
|                     | 2281.913 |           | 2281.913 | 20  | D | 3        | 531.2653 | +0.246737           | 531.2653           |
|                     | 2428.982 |           | 2428.982 | 21  | F | 2        | 416.2383 | +0.002073           | 416.2383           |
| +0.137138           | 1272.016 |           | 2543.025 | 22  | N | 1        | 269.1699 |                     | 269.1699           |
|                     |          |           |          | 23  | K | 0        | 155.127  |                     | 155.127            |

#### general information

|                       |             |
|-----------------------|-------------|
| Annotation:           | 18 of 23    |
| AminoAcids Coverag    | 78 %        |
| Intensity Coverage:   | 42 %        |
| Protein Localisation: | 110 ... 132 |

Source: 20120514\_VR\_Bsu\_TripleSILACrep1\_pL2ESLS\_F20  
 Scannumber: 12322  
 Protein: BSU00650; yab5  
 Peptide Score: 218.12  
 Method: ITMS; CID; 3

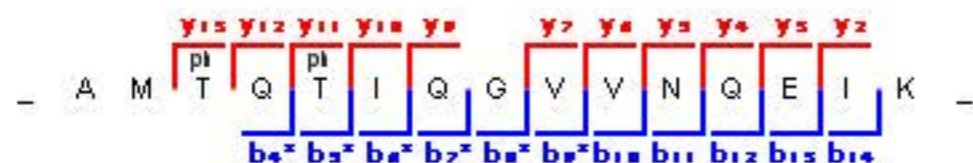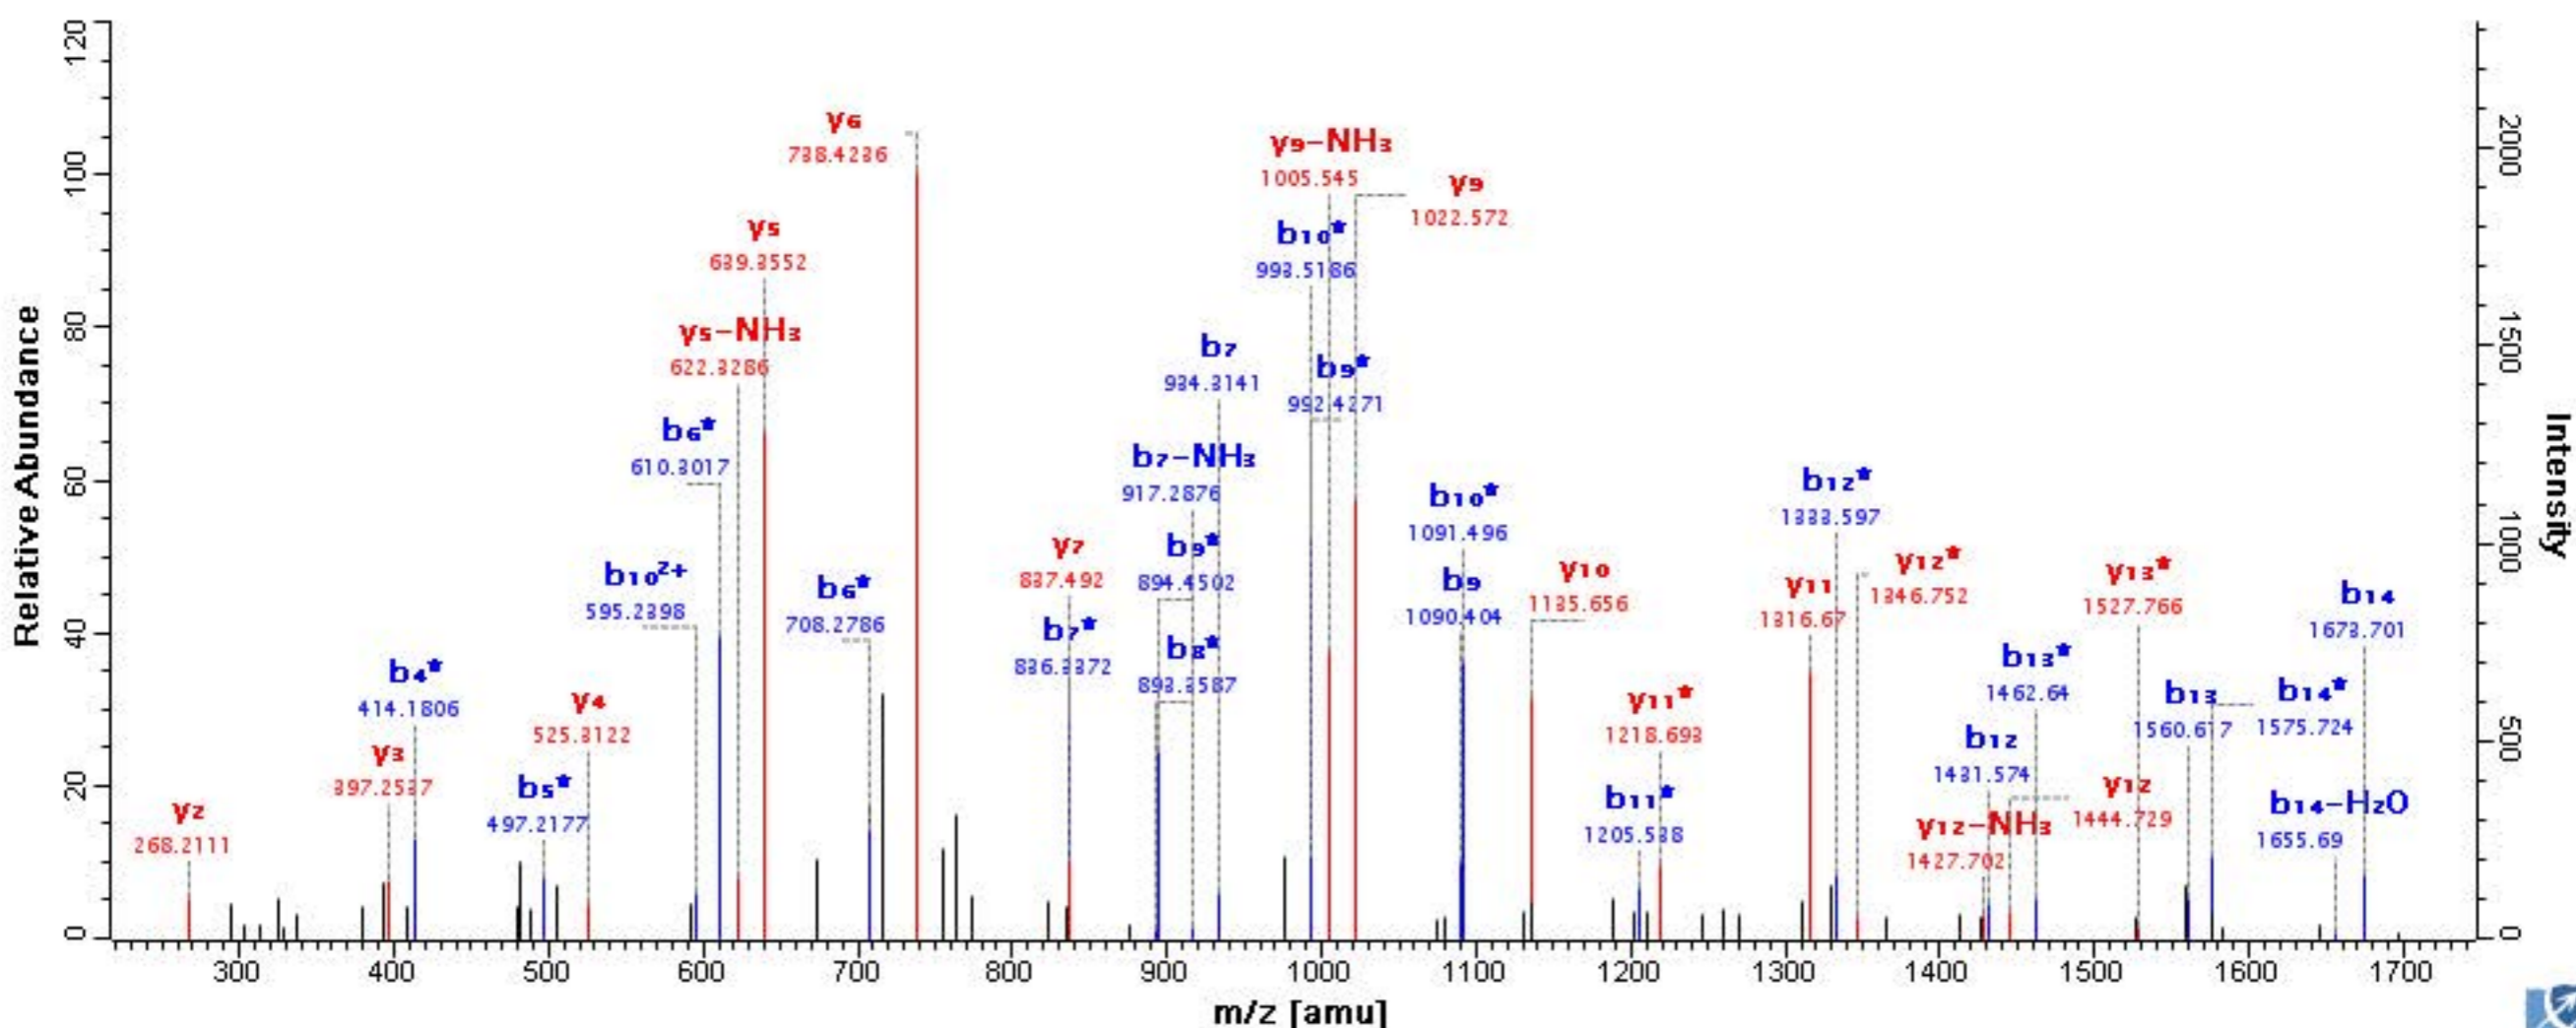

#### precursor information

|                   |                     |
|-------------------|---------------------|
| Mass:             | 1826.81371          |
| m/z:              | System.Collections. |
| Charge:           | System.Collections. |
| Retentiontime:    | System.Collections. |
| Score:            | 218.1193            |
| Mass Error [ppm]: | 0.38019             |
| PEP:              | 4.1264E-125         |
| Precursor Type:   | ISO                 |

#### general information

|                       |            |
|-----------------------|------------|
| Annotation:           | 13 of 15   |
| AminoAcids Coverag    | 87 %       |
| Intensity Coverage:   | 72 %       |
| Protein Localisation: | 86 ... 100 |

| b <sup>2+</sup> ion |              | b ion      |              |    |     |    | γ ion        |            |
|---------------------|--------------|------------|--------------|----|-----|----|--------------|------------|
| Δ dalton            | mass         | Δ dalton   | mass         |    | seq |    | Δ dalton     | mass       |
|                     | 72.044390254 |            | 72.044390254 | 1  | A   | 14 |              |            |
|                     | 203.08487486 |            | 203.08487486 | 2  | M   | 13 | 1756.7831779 |            |
|                     | 384.09888374 |            | 384.09888374 | 3  | T   | 12 | 1625.7426933 |            |
|                     | 512.15746125 |            | 512.15746125 | 4  | Q   | 11 | 1444.7286845 | -0.2319804 |
|                     | 693.17147014 |            | 693.17147014 | 5  | T   | 10 | 1316.6701069 | -0.090395  |
|                     | 806.25553412 |            | 806.25553412 | 6  | I   | 9  | 1135.6560981 | -0.0236518 |
|                     | 934.31411163 | -0.2196902 | 934.31411163 | 7  | Q   | 8  | 1022.5720341 | +0.0366695 |
|                     | 991.33557535 |            | 991.33557535 | 8  | G   | 7  | 894.51345658 |            |
|                     | 1090.4039893 | +0.0198389 | 1090.4039893 | 9  | V   | 6  | 837.49199285 | -0.0180549 |
| -0.0098594          | 595.23983983 |            | 1189.4724032 | 10 | V   | 5  | 738.42357894 | +0.13886   |
|                     | 1303.5153306 |            | 1303.5153306 | 11 | N   | 4  | 639.35516502 | +0.0871568 |
|                     | 1431.5739081 | -0.1217597 | 1431.5739081 | 12 | Q   | 3  | 525.31223757 | -0.2883118 |
|                     | 1560.6165012 | +0.0283962 | 1560.6165012 | 13 | E   | 2  | 397.25366006 | +0.0321981 |
|                     | 1673.7005652 | -0.0269812 | 1673.7005652 | 14 | I   | 1  | 268.21106696 | +0.0396349 |
|                     |              |            |              | 15 | K   | 0  | 155.12700298 |            |



Source: 20120514\_VR\_Bsu\_TripleSILACrep1\_pL2ESLS\_F20  
 Scannumber: 12384  
 Protein: BSU11720; fabI; yjbW  
 Peptide Score: 135.86  
 Method: ITMS; CID; 3

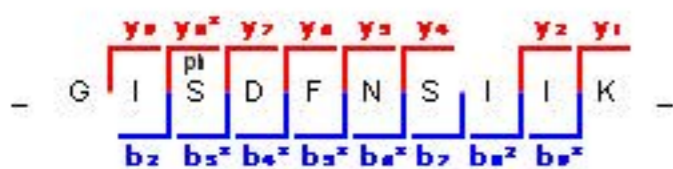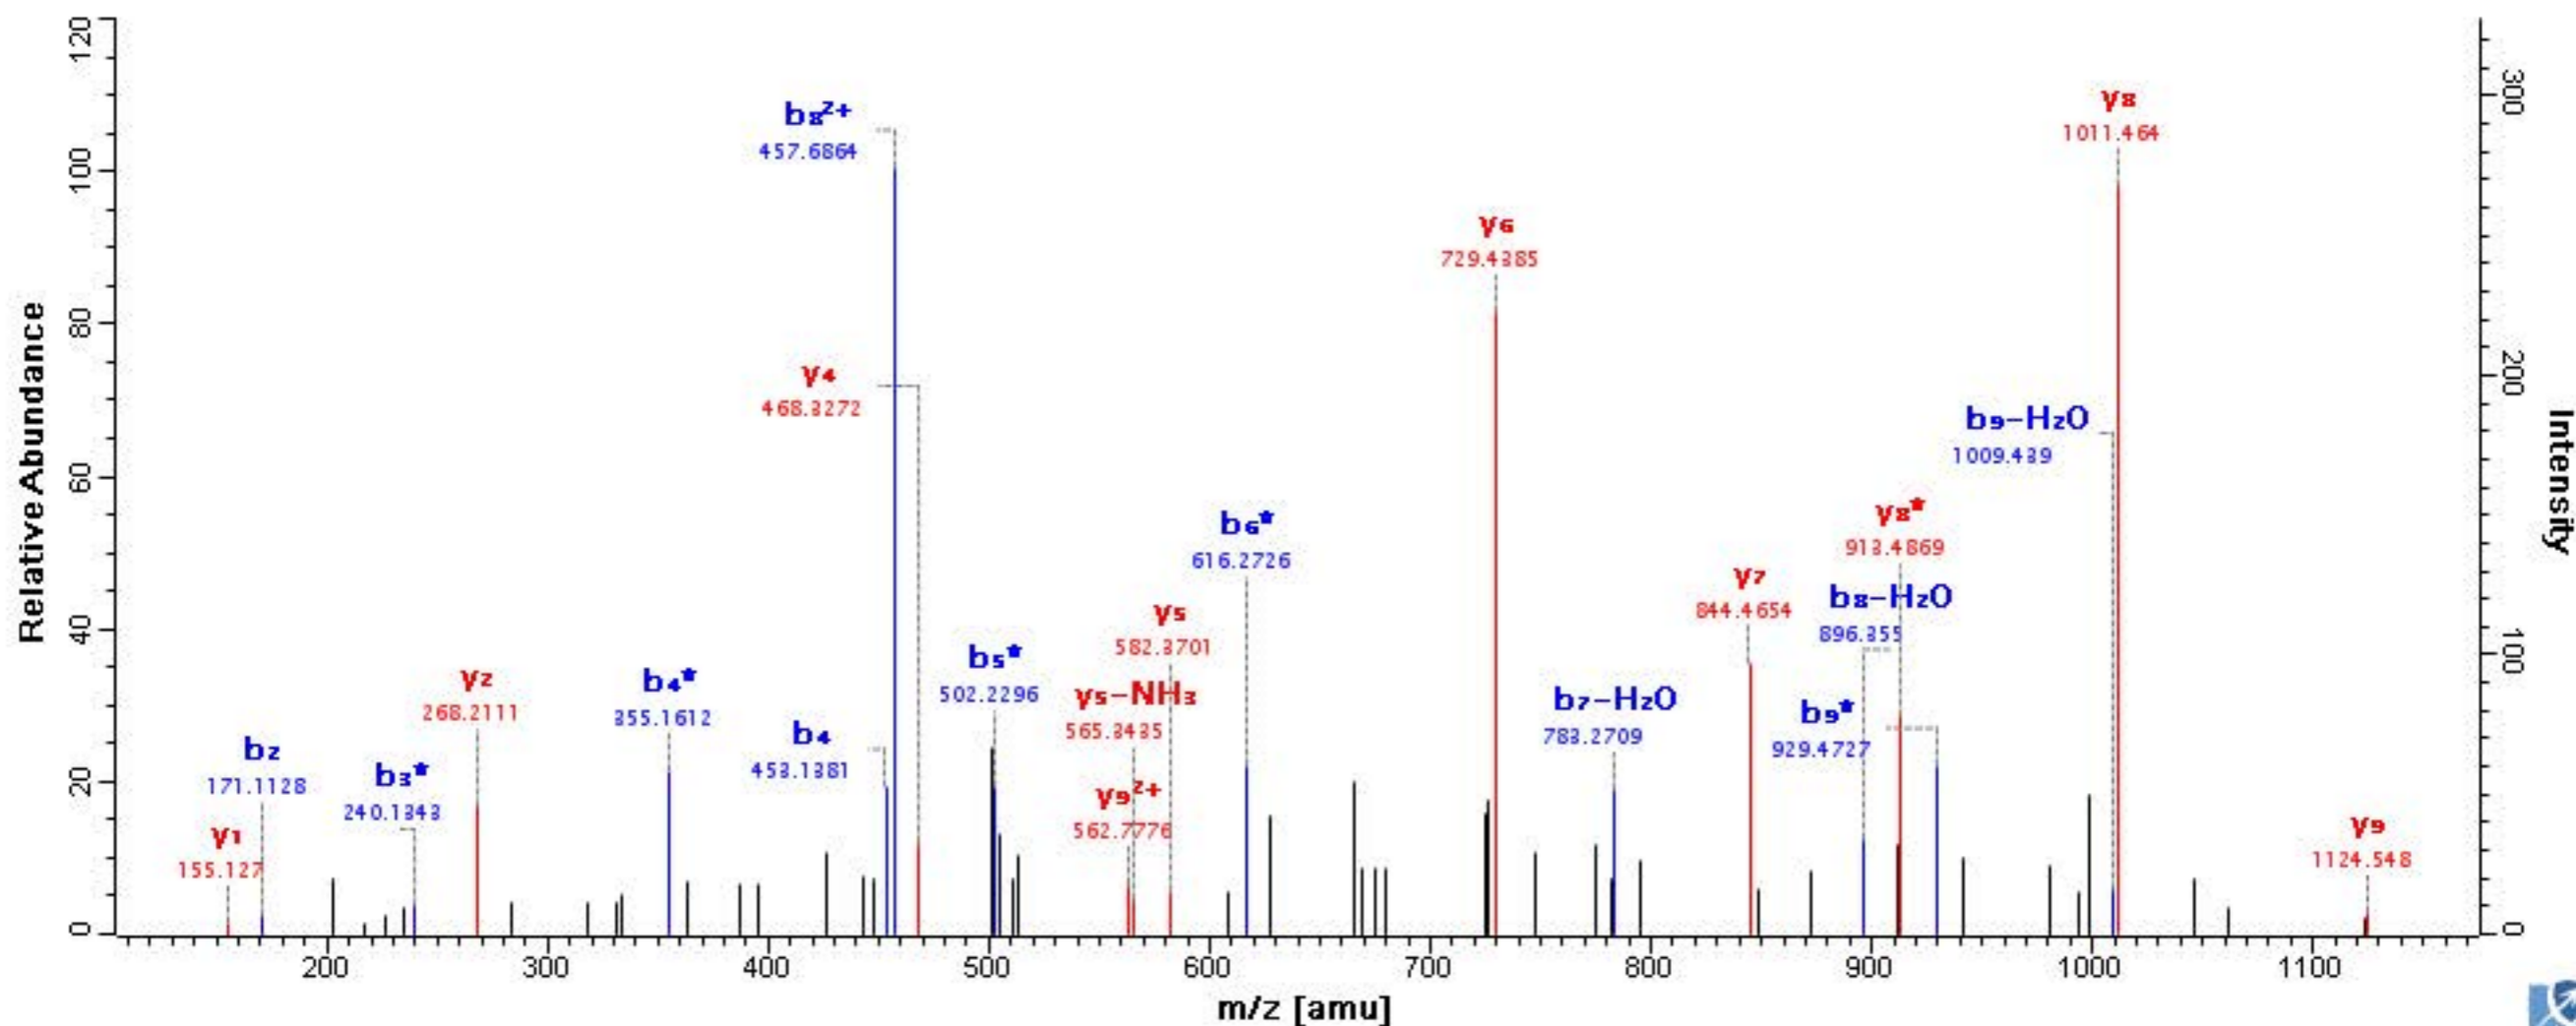

**precursor information**

|                   |                     |
|-------------------|---------------------|
| Mass:             | 1180.56214          |
| m/z:              | System.Collections. |
| Charge:           | System.Collections. |
| Retentiontime:    | System.Collections. |
| Score:            | 135.8587            |
| Mass Error [ppm]: | 0.07697             |
| PEP:              | 1.7348E-05          |
| Precursor Type:   | ISO                 |

**general information**

|                       |             |
|-----------------------|-------------|
| Annotation:           | 9 of 10     |
| AminoAcids Coverage:  | 90 %        |
| Intensity Coverage:   | 60 %        |
| Protein Localisation: | 201 ... 210 |

| b <sup>2+</sup> ion |          | b ion     |          |     | y ion |          | y <sup>2+</sup> ion |           |          |           |
|---------------------|----------|-----------|----------|-----|-------|----------|---------------------|-----------|----------|-----------|
| Δ dalton            | mass     | Δ dalton  | mass     | seq |       | Δ dalton | mass                | Δ dalton  | mass     |           |
|                     | 58.02874 |           | 58.02874 | 1   | G     | 9        |                     |           |          |           |
|                     | 171.1128 | +0.047123 | 171.1128 | 2   | I     | 8        | 1124.548            | +0.102036 | 562.7776 | +0.396318 |
|                     | 338.1112 |           | 338.1112 | 3   | S     | 7        | 1011.464            | +0.031803 | 1011.464 |           |
|                     | 453.1381 | +0.099748 | 453.1381 | 4   | D     | 6        | 844.4654            | +0.170237 | 844.4654 |           |
|                     | 600.2065 |           | 600.2065 | 5   | F     | 5        | 729.4385            | +0.138526 | 729.4385 |           |
|                     | 714.2494 |           | 714.2494 | 6   | N     | 4        | 582.3701            | -0.118378 | 582.3701 |           |
|                     | 801.2815 |           | 801.2815 | 7   | S     | 3        | 468.3272            | -0.035655 | 468.3272 |           |
| -0.322517           | 457.6864 |           | 914.3655 | 8   | I     | 2        | 381.2951            |           | 381.2951 |           |
|                     | 1027.45  |           | 1027.45  | 9   | I     | 1        | 268.2111            | -0.031318 | 268.2111 |           |
|                     |          |           |          | 10  | K     | 0        | 155.127             | +0.049999 | 155.127  |           |

Source: 20120514\_VR\_Bsu\_TripleSILACrep1\_pL2ESLS\_F20  
 Scannumber: 13118  
 Protein: BSU13900; ptsH  
 Peptide Score: 214.88  
 Method: ITMS; CID; 3

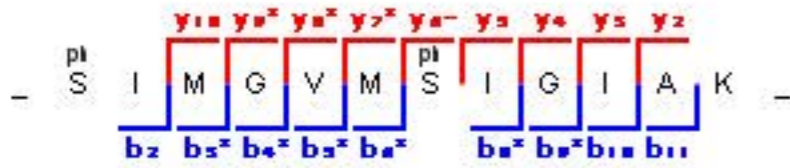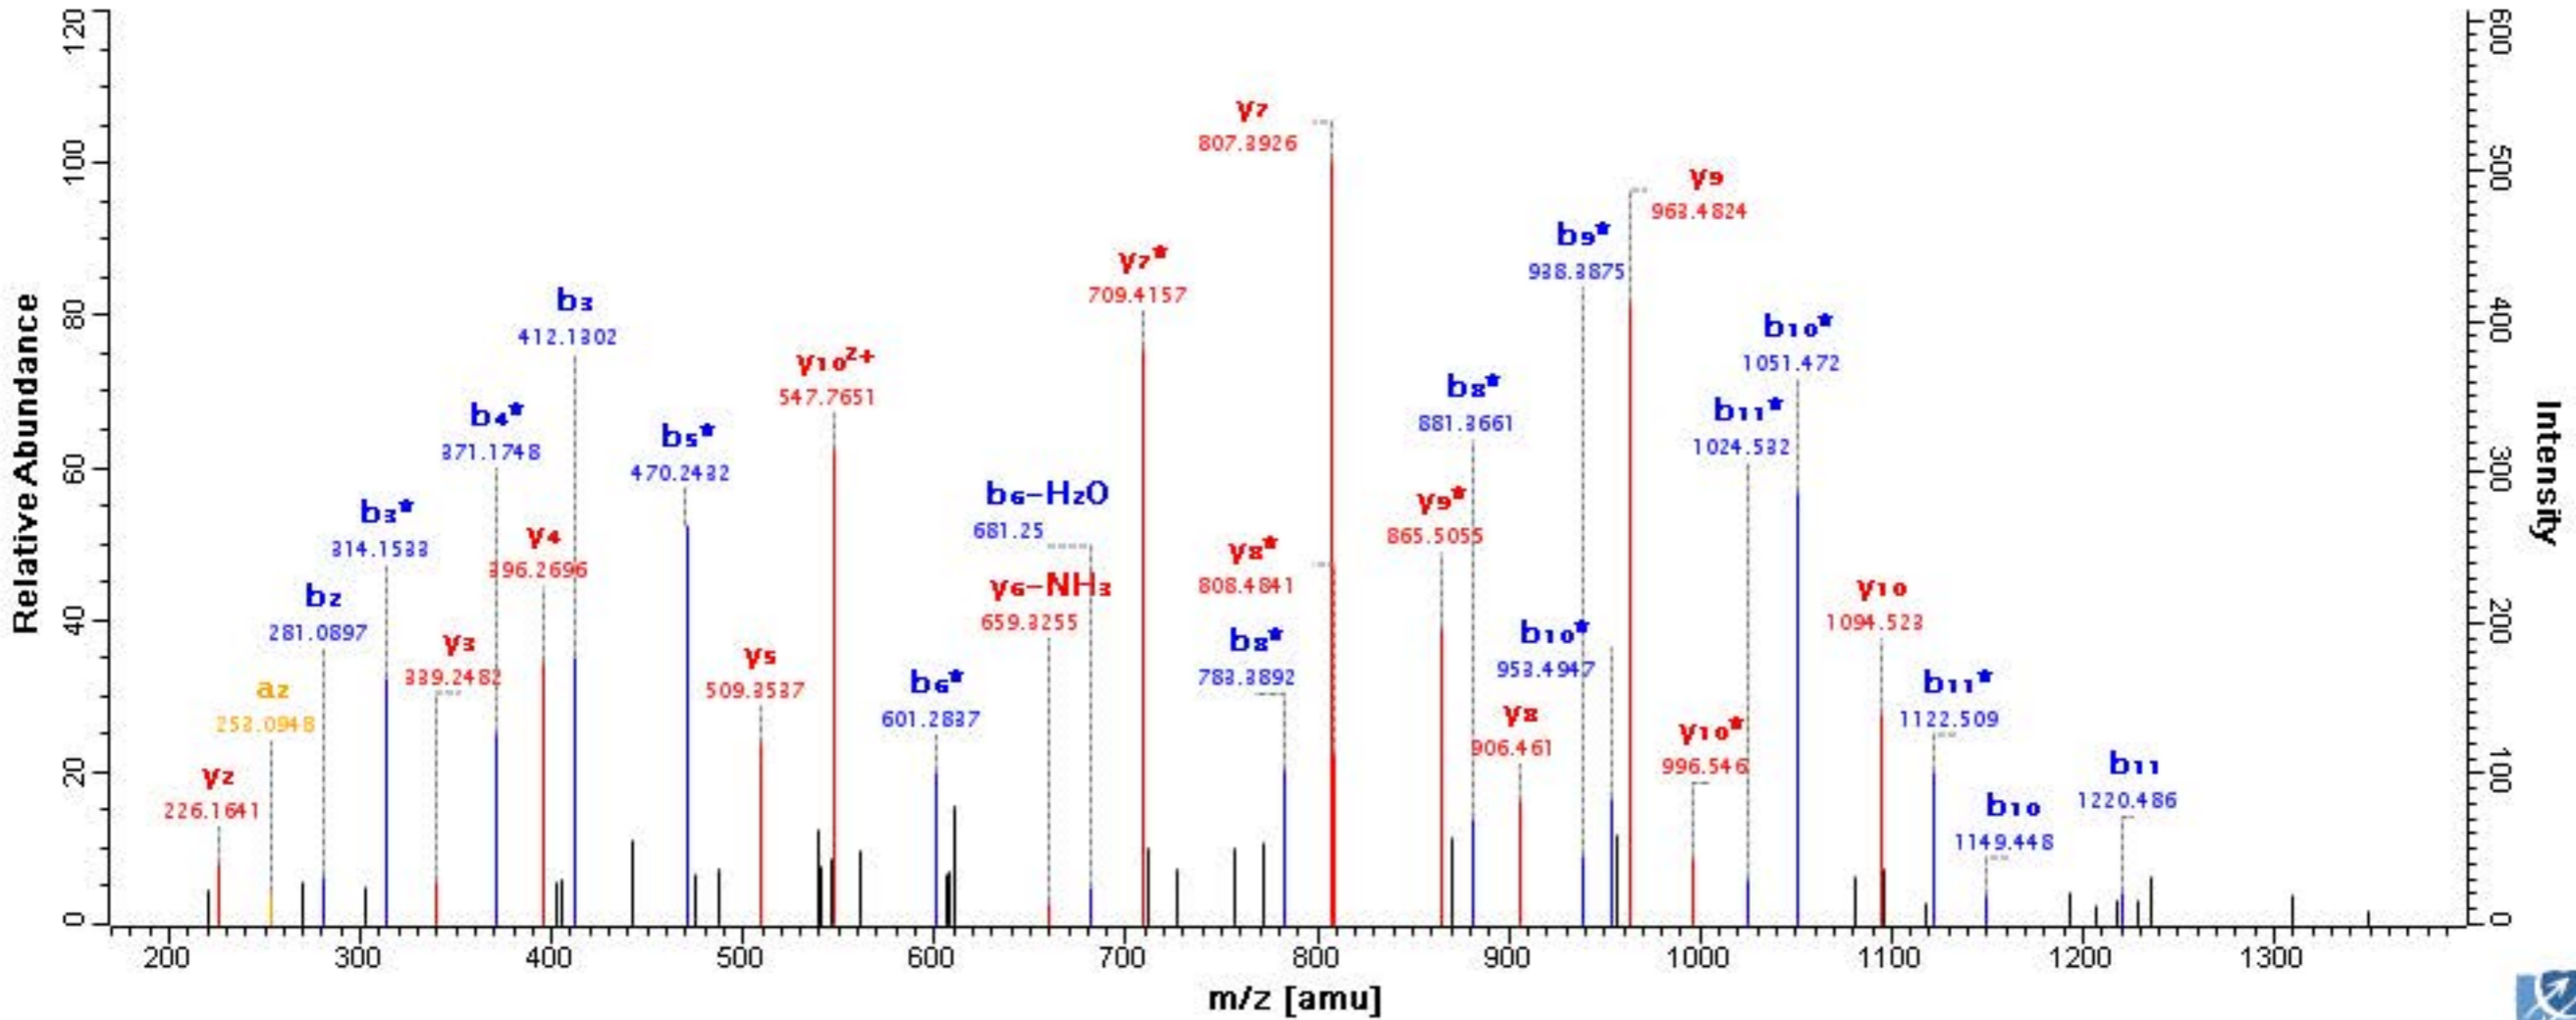

#### precursor information

|                   |                     |
|-------------------|---------------------|
| Mass:             | 1373.59834          |
| m/z:              | System.Collections. |
| Charge:           | System.Collections. |
| Retentiontime:    | System.Collections. |
| Score:            | 214.8793            |
| Mass Error [ppm]: | 0.20363             |
| PEP:              | 3.6979E-125         |
| Precursor Type:   | ISO                 |

#### general information

|                       |           |
|-----------------------|-----------|
| Annotation:           | 10 of 12  |
| AminoAcids Coverag    | 83 %      |
| Intensity Coverage:   | 77 %      |
| Protein Localisation: | 46 ... 57 |

| a ion     |          | b ion     |          |    |     |    | γ ion    |           | γ <sup>2+</sup> ion |           |
|-----------|----------|-----------|----------|----|-----|----|----------|-----------|---------------------|-----------|
| Δ dalton  | mass     | Δ dalton  | mass     |    | seq |    | Δ dalton | mass      | Δ dalton            | mass      |
|           | 140.0107 |           | 168.0056 | 1  | S   | 11 |          |           |                     |           |
| +0.125415 | 253.0948 | +0.022422 | 281.0897 | 2  | I   | 10 | 1207.607 |           | 1207.607            |           |
|           | 384.1353 | +0.068547 | 412.1302 | 3  | M   | 9  | 1094.523 | +0.205113 | 547.7651            | +0.095073 |
|           | 441.1567 |           | 469.1516 | 4  | G   | 8  | 963.4824 | +0.182915 | 963.4824            |           |
|           | 540.2251 |           | 568.2201 | 5  | V   | 7  | 906.461  | +0.07181  | 906.461             |           |
|           | 671.2656 |           | 699.2605 | 6  | M   | 6  | 807.3926 | -0.03983  | 807.3926            |           |
|           | 838.264  |           | 866.2589 | 7  | S   | 5  | 676.3521 |           | 676.3521            |           |
|           | 951.3481 |           | 979.343  | 8  | I   | 4  | 509.3537 | -0.026987 | 509.3537            |           |
|           | 1008.37  |           | 1036.364 | 9  | G   | 3  | 396.2696 | +0.073556 | 396.2696            |           |
|           | 1121.454 | +0.057851 | 1149.448 | 10 | I   | 2  | 339.2482 | -0.088391 | 339.2482            |           |
|           | 1192.491 | -0.168472 | 1220.486 | 11 | A   | 1  | 226.1641 | -0.004571 | 226.1641            |           |
|           |          |           |          | 12 | K   | 0  | 155.127  |           | 155.127             |           |

Source: 20120514\_VR\_Bsu\_TripleSILACrep1\_pL2ESLS\_F20  
 Scannumber: 14143  
 Protein: BSU04710; rsbV  
 Peptide Score: 342.42  
 Method: ITMS; CID; 3

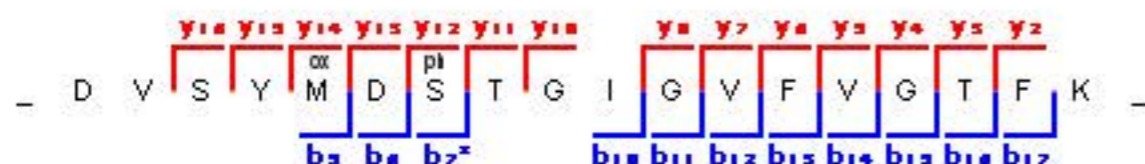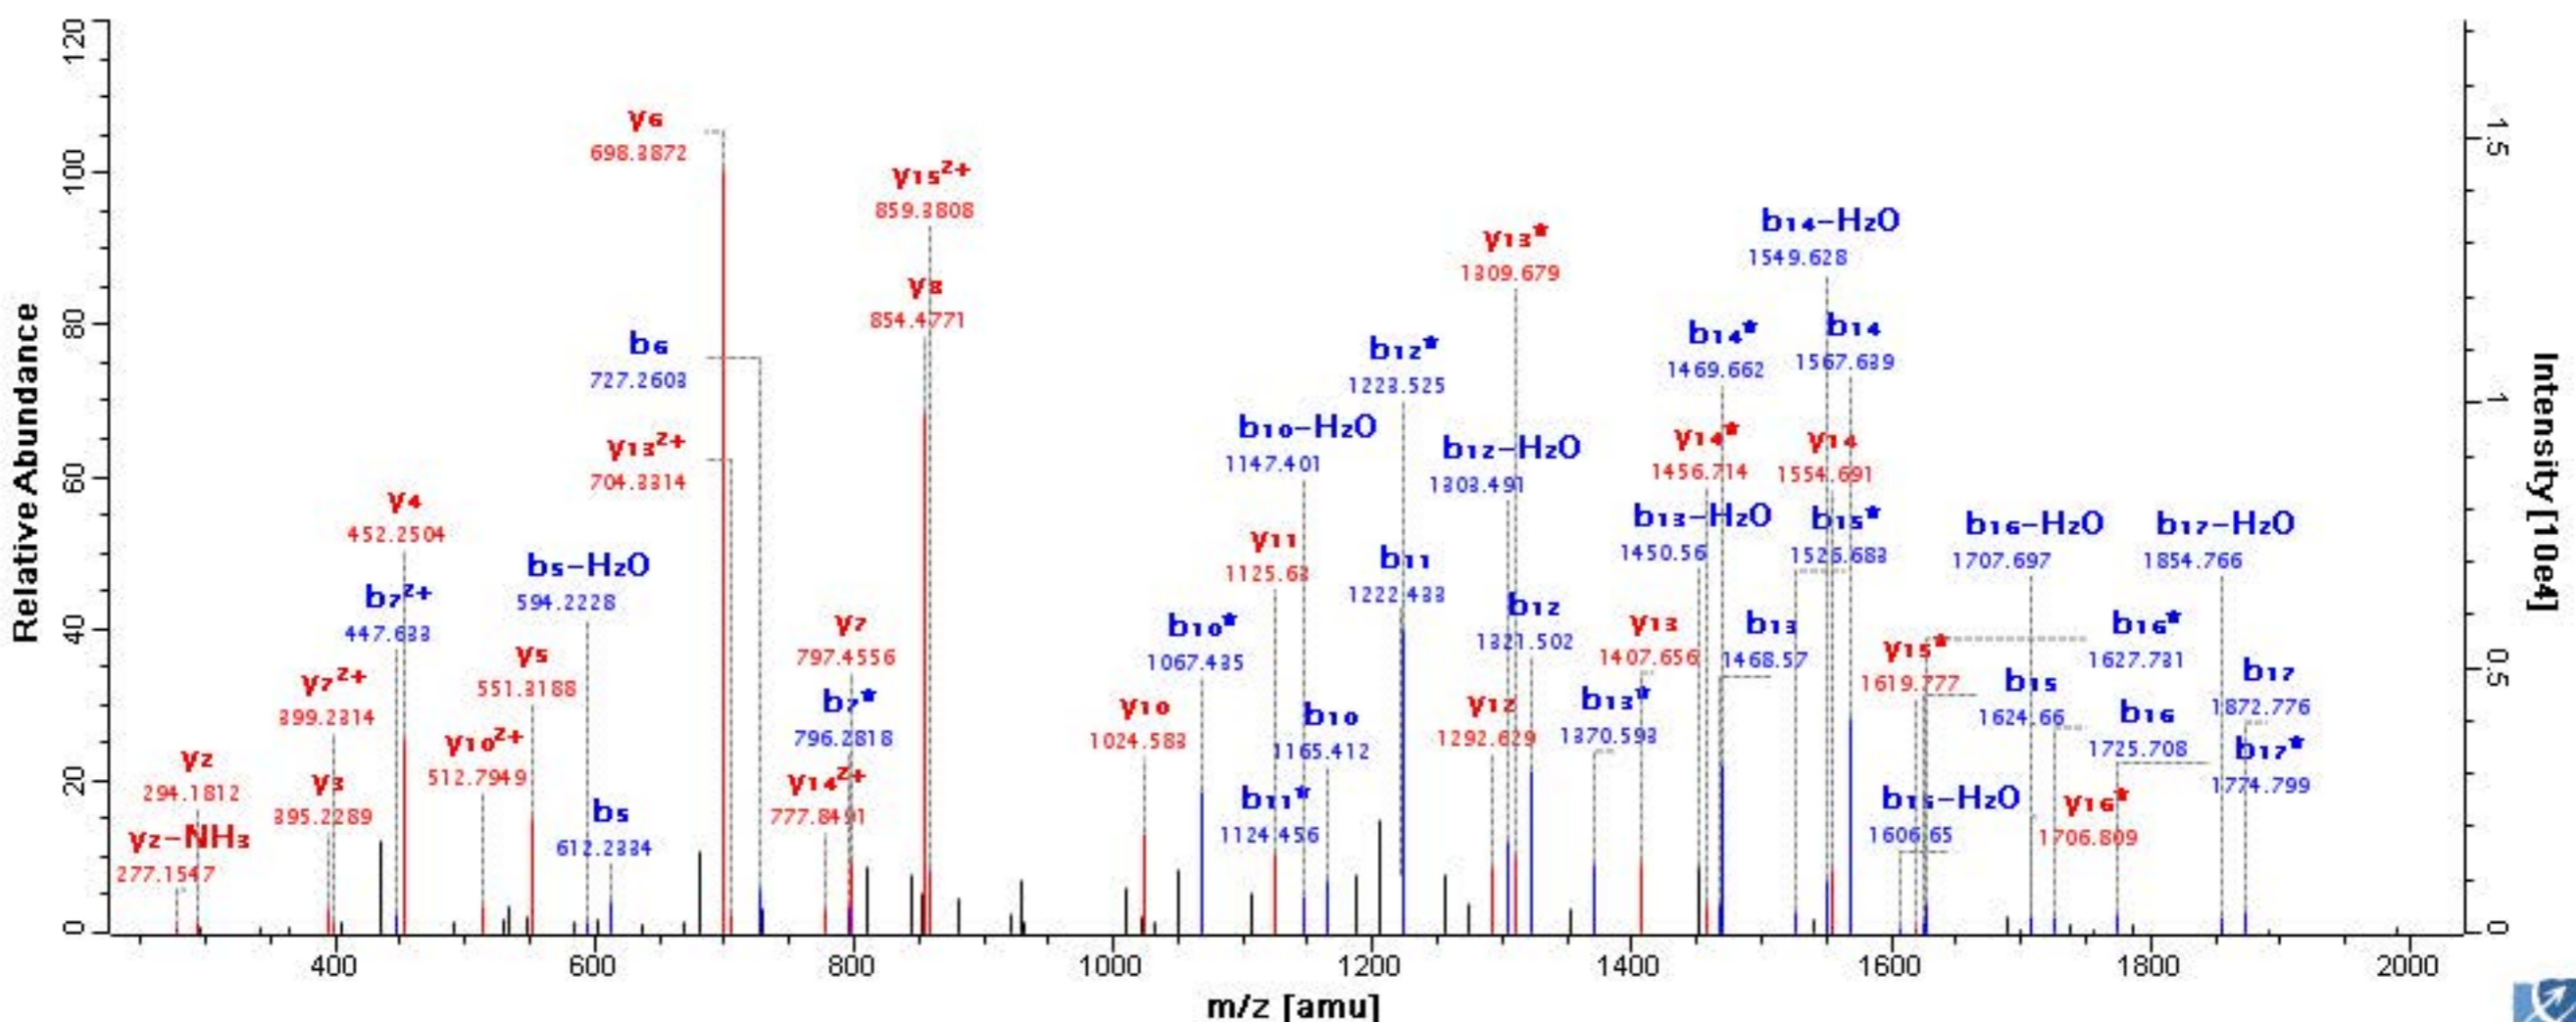

#### precursor information

|                   |                     |
|-------------------|---------------------|
| Mass:             | 2017.87423          |
| m/z:              | System.Collections. |
| Charge:           | System.Collections. |
| Retentiontime:    | System.Collections. |
| Score:            | 342.4177            |
| Mass Error [ppm]: | -0.088221           |
| PEP:              | 6.0554E-285         |
| Precursor Type:   | MULTI               |

| b <sup>2+</sup> ion |          | b ion     |          | seq |   |    | y ion    |           | y <sup>2+</sup> ion |           |
|---------------------|----------|-----------|----------|-----|---|----|----------|-----------|---------------------|-----------|
| Δ dalton            | mass     | Δ dalton  | mass     |     |   |    | Δ dalton | mass      | Δ dalton            | mass      |
|                     | 116.0342 |           | 116.0342 | 1   | D | 17 |          |           |                     |           |
|                     | 215.1026 |           | 215.1026 | 2   | V | 16 | 1903.855 |           | 1903.855            |           |
|                     | 302.1347 |           | 302.1347 | 3   | S | 15 | 1804.786 |           | 1804.786            |           |
|                     | 465.198  |           | 465.198  | 4   | Y | 14 | 1717.754 |           | 859.3808            | +0.118967 |
|                     | 612.2334 | +0.003427 | 612.2334 | 5   | M | 13 | 1554.691 | +0.207464 | 777.8491            | +0.295895 |
|                     | 727.2603 | -0.053179 | 727.2603 | 6   | D | 12 | 1407.656 | -0.068049 | 704.3314            | -0.066349 |
| -0.34386            | 447.633  |           | 894.2587 | 7   | S | 11 | 1292.629 | +0.013581 | 1292.629            |           |
|                     | 995.3064 |           | 995.3064 | 8   | T | 10 | 1125.63  | +0.062965 | 1125.63             |           |
|                     | 1052.328 |           | 1052.328 | 9   | G | 9  | 1024.583 | +0.079516 | 512.7949            | +0.476305 |
|                     | 1165.412 | +0.099577 | 1165.412 | 10  | I | 8  | 967.5611 |           | 967.5611            |           |
|                     | 1222.433 | +0.449451 | 1222.433 | 11  | G | 7  | 854.4771 | +0.08165  | 854.4771            |           |
|                     | 1321.502 | +0.1524   | 1321.502 | 12  | V | 6  | 797.4556 | +0.065638 | 399.2314            | +0.195258 |
|                     | 1468.57  | -0.098632 | 1468.57  | 13  | F | 5  | 698.3872 | -0.02647  | 698.3872            |           |
|                     | 1567.639 | -0.021049 | 1567.639 | 14  | V | 4  | 551.3188 | +0.116895 | 551.3188            |           |
|                     | 1624.66  | -0.096712 | 1624.66  | 15  | G | 3  | 452.2504 | +0.000403 | 452.2504            |           |
|                     | 1725.708 | -0.012189 | 1725.708 | 16  | T | 2  | 395.2289 | +0.026413 | 395.2289            |           |
|                     | 1872.776 | +0.183924 | 1872.776 | 17  | F | 1  | 294.1812 | +0.188685 | 294.1812            |           |
|                     |          |           |          | 18  | K | 0  | 147.1128 |           | 147.1128            |           |

#### general information

|                       |           |
|-----------------------|-----------|
| Annotation:           | 15 of 18  |
| AminoAcids Coverag    | 83 %      |
| Intensity Coverage:   | 76 %      |
| Protein Localisation: | 50 ... 67 |

Source: 20120514\_VR\_Bsu\_TripleSILACrep1\_pL2ESLS\_F20  
 Scannumber: 14162  
 Protein: BSU07260; Ita51; yfml  
 Peptide Score: 94.84  
 Method: ITMS; CID; 3

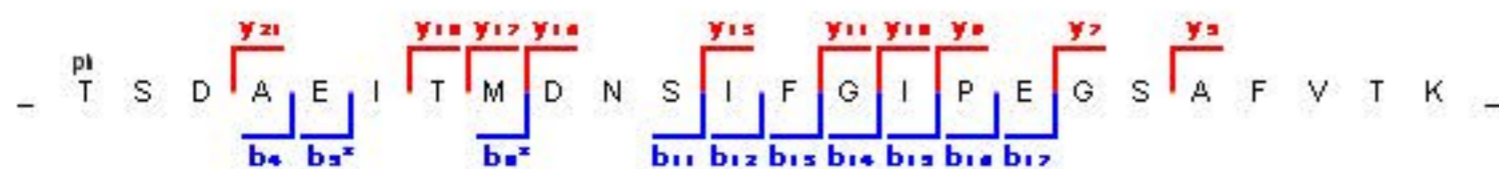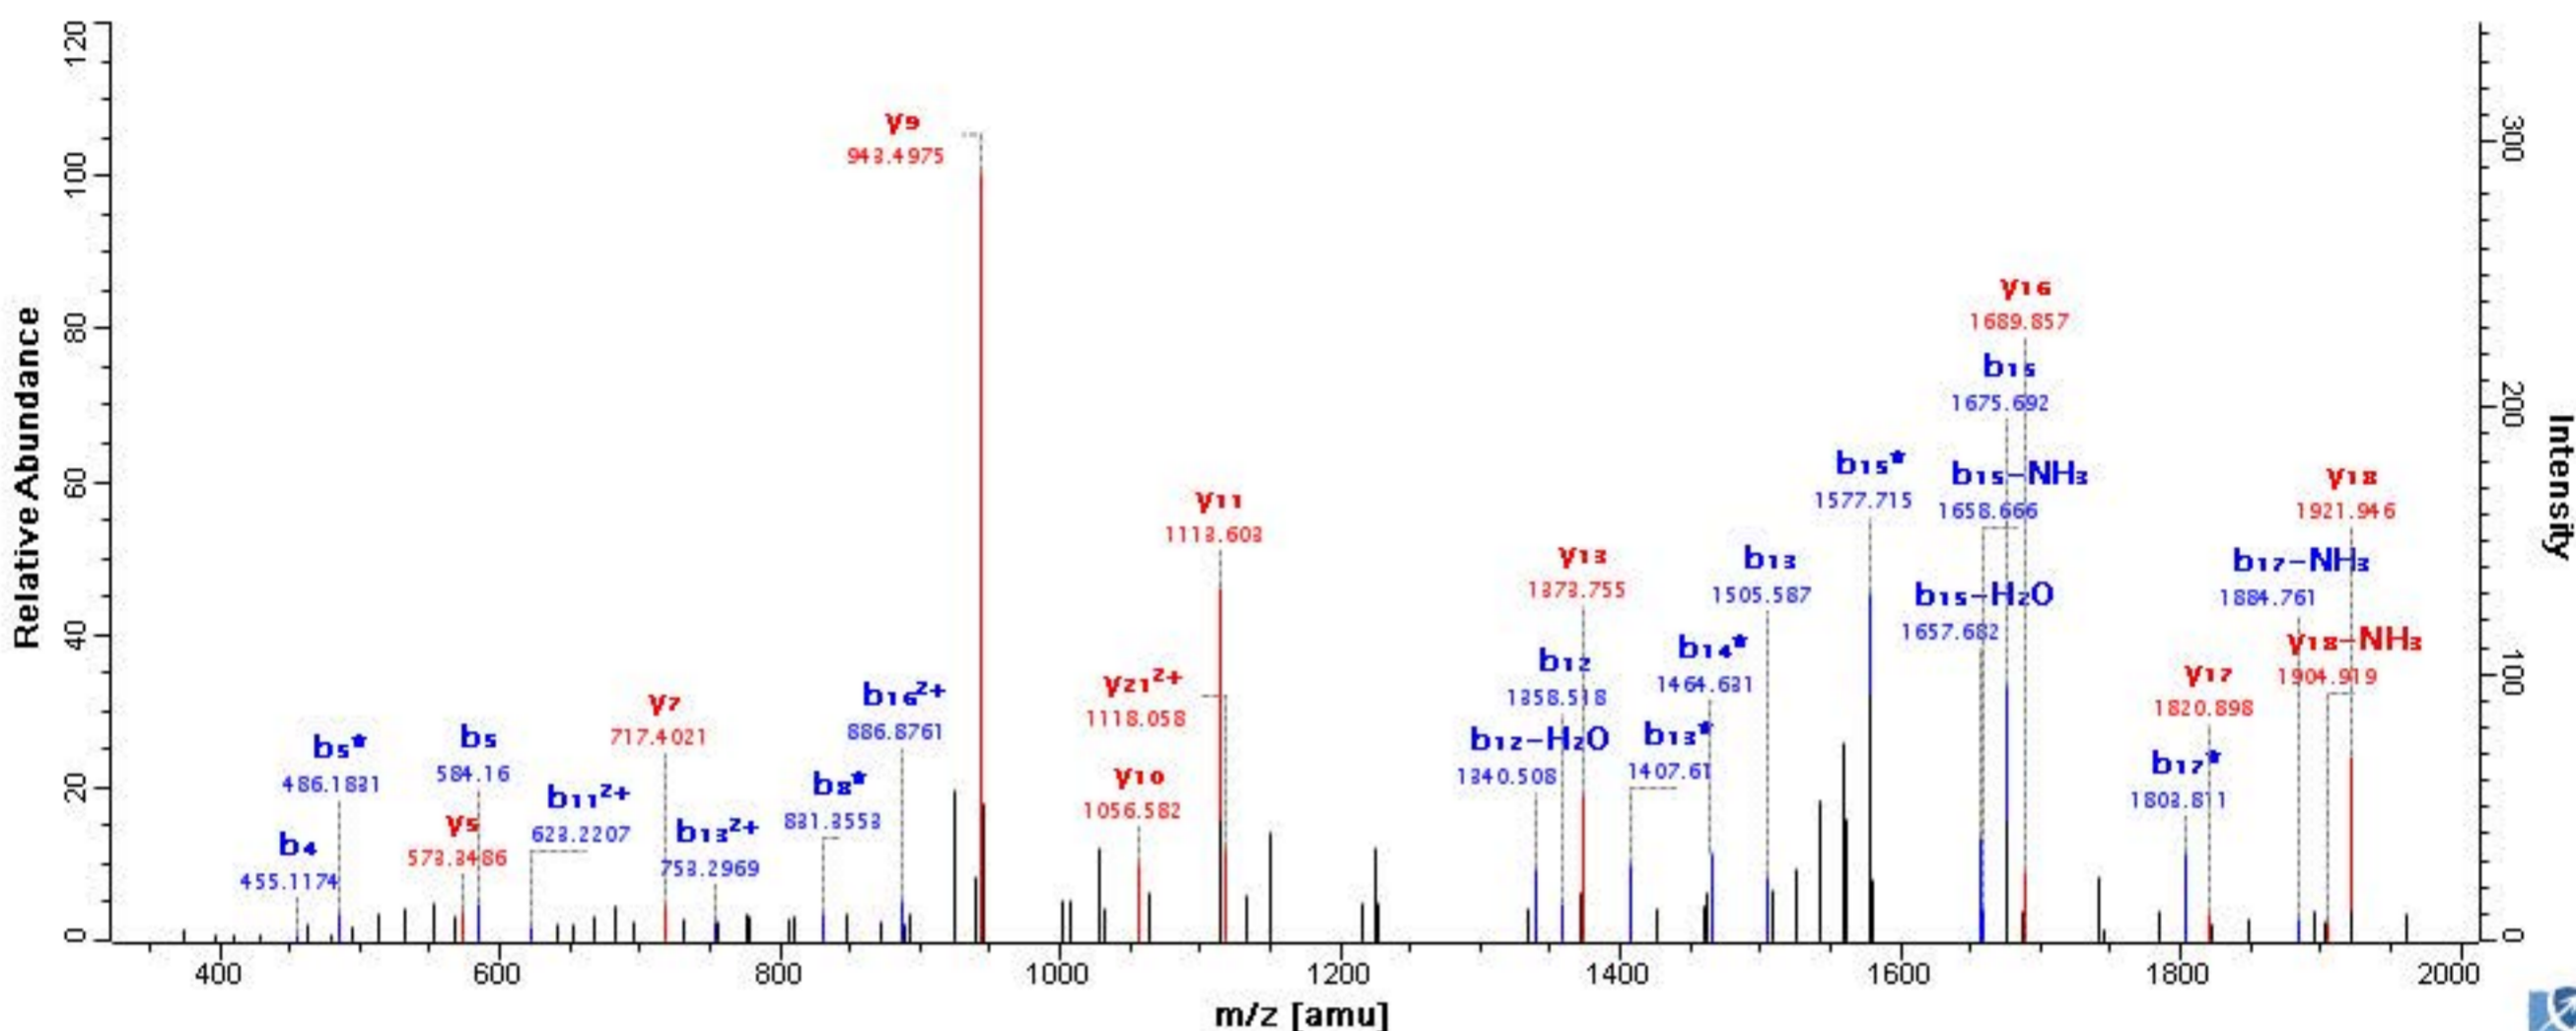

#### precursor information

|                   |                     |
|-------------------|---------------------|
| Mass:             | 2617.17538          |
| m/z:              | System.Collections. |
| Charge:           | System.Collections. |
| Retentiontime:    | System.Collections. |
| Score:            | 94.83795            |
| Mass Error [ppm]: | 0.13942             |
| PEP:              | 1.5648E-07          |
| Precursor Type:   | ISO                 |

| b <sup>2+</sup> ion |          | b ion     |          | seq |   |    | y ion    |           | y <sup>2+</sup> ion |           |
|---------------------|----------|-----------|----------|-----|---|----|----------|-----------|---------------------|-----------|
| Δ dalton            | mass     | Δ dalton  | mass     |     |   |    | Δ dalton | mass      | Δ dalton            | mass      |
|                     | 182.0213 |           | 182.0213 | 1   | T | 23 |          |           |                     |           |
|                     | 269.0533 |           | 269.0533 | 2   | S | 22 | 2437.168 |           | 2437.168            |           |
|                     | 384.0803 |           | 384.0803 | 3   | D | 21 | 2350.136 |           | 2350.136            |           |
|                     | 455.1174 | +0.290344 | 455.1174 | 4   | A | 20 | 2235.109 |           | 1118.058            | +0.221736 |
|                     | 584.16   | +0.08552  | 584.16   | 5   | E | 19 | 2164.072 |           | 2164.072            |           |
|                     | 697.244  |           | 697.244  | 6   | I | 18 | 2035.03  |           | 2035.03             |           |
|                     | 798.2917 |           | 798.2917 | 7   | T | 17 | 1921.946 | -0.09239  | 1921.946            |           |
|                     | 929.3322 |           | 929.3322 | 8   | M | 16 | 1820.898 | +0.297207 | 1820.898            |           |
|                     | 1044.359 |           | 1044.359 | 9   | D | 15 | 1689.857 | +0.041793 | 1689.857            |           |
|                     | 1158.402 |           | 1158.402 | 10  | N | 14 | 1574.83  |           | 1574.83             |           |
| +0.093526           | 623.2207 |           | 1245.434 | 11  | S | 13 | 1460.788 |           | 1460.788            |           |
|                     | 1358.518 | -0.113613 | 1358.518 | 12  | I | 12 | 1373.755 | +0.096085 | 1373.755            |           |
| +0.093093           | 753.2969 | +0.111064 | 1505.587 | 13  | F | 11 | 1260.671 |           | 1260.671            |           |
|                     | 1562.608 |           | 1562.608 | 14  | G | 10 | 1113.603 | +0.044705 | 1113.603            |           |
|                     | 1675.692 | -0.021563 | 1675.692 | 15  | I | 9  | 1056.582 | +0.042243 | 1056.582            |           |
| -0.353851           | 886.8761 |           | 1772.745 | 16  | P | 8  | 943.4975 | +0.113001 | 943.4975            |           |
|                     | 1901.787 |           | 1901.787 | 17  | E | 7  | 846.4447 |           | 846.4447            |           |
|                     | 1958.809 |           | 1958.809 | 18  | G | 6  | 717.4021 | +0.272995 | 717.4021            |           |
|                     | 2045.841 |           | 2045.841 | 19  | S | 5  | 660.3807 |           | 660.3807            |           |
|                     | 2116.878 |           | 2116.878 | 20  | A | 4  | 573.3486 | -0.131948 | 573.3486            |           |
|                     | 2263.946 |           | 2263.946 | 21  | F | 3  | 502.3115 |           | 502.3115            |           |
|                     | 2363.015 |           | 2363.015 | 22  | V | 2  | 355.2431 |           | 355.2431            |           |
|                     | 2464.063 |           | 2464.063 | 23  | T | 1  | 256.1747 |           | 256.1747            |           |
|                     |          |           |          | 24  | K | 0  | 155.127  |           | 155.127             |           |

#### general information

|                       |             |
|-----------------------|-------------|
| Annotation:           | 14 of 24    |
| AminoAcids Coverag    | 58 %        |
| Intensity Coverage:   | 50 %        |
| Protein Localisation: | 297 ... 320 |

Source: 20120514\_VR\_Bsu\_TripleSILACrep1\_pL2ESLS\_F20  
 Scannumber: 5407  
 Protein: aceC; BSU14600; pdhC  
 Peptide Score: 183.23  
 Method: ITMS; CID; 3

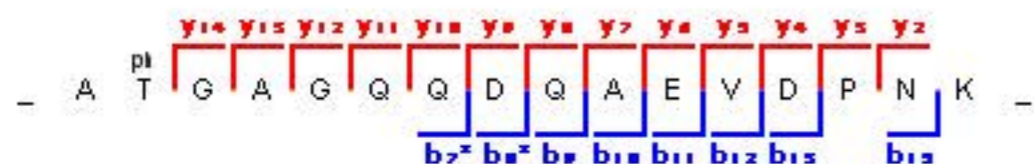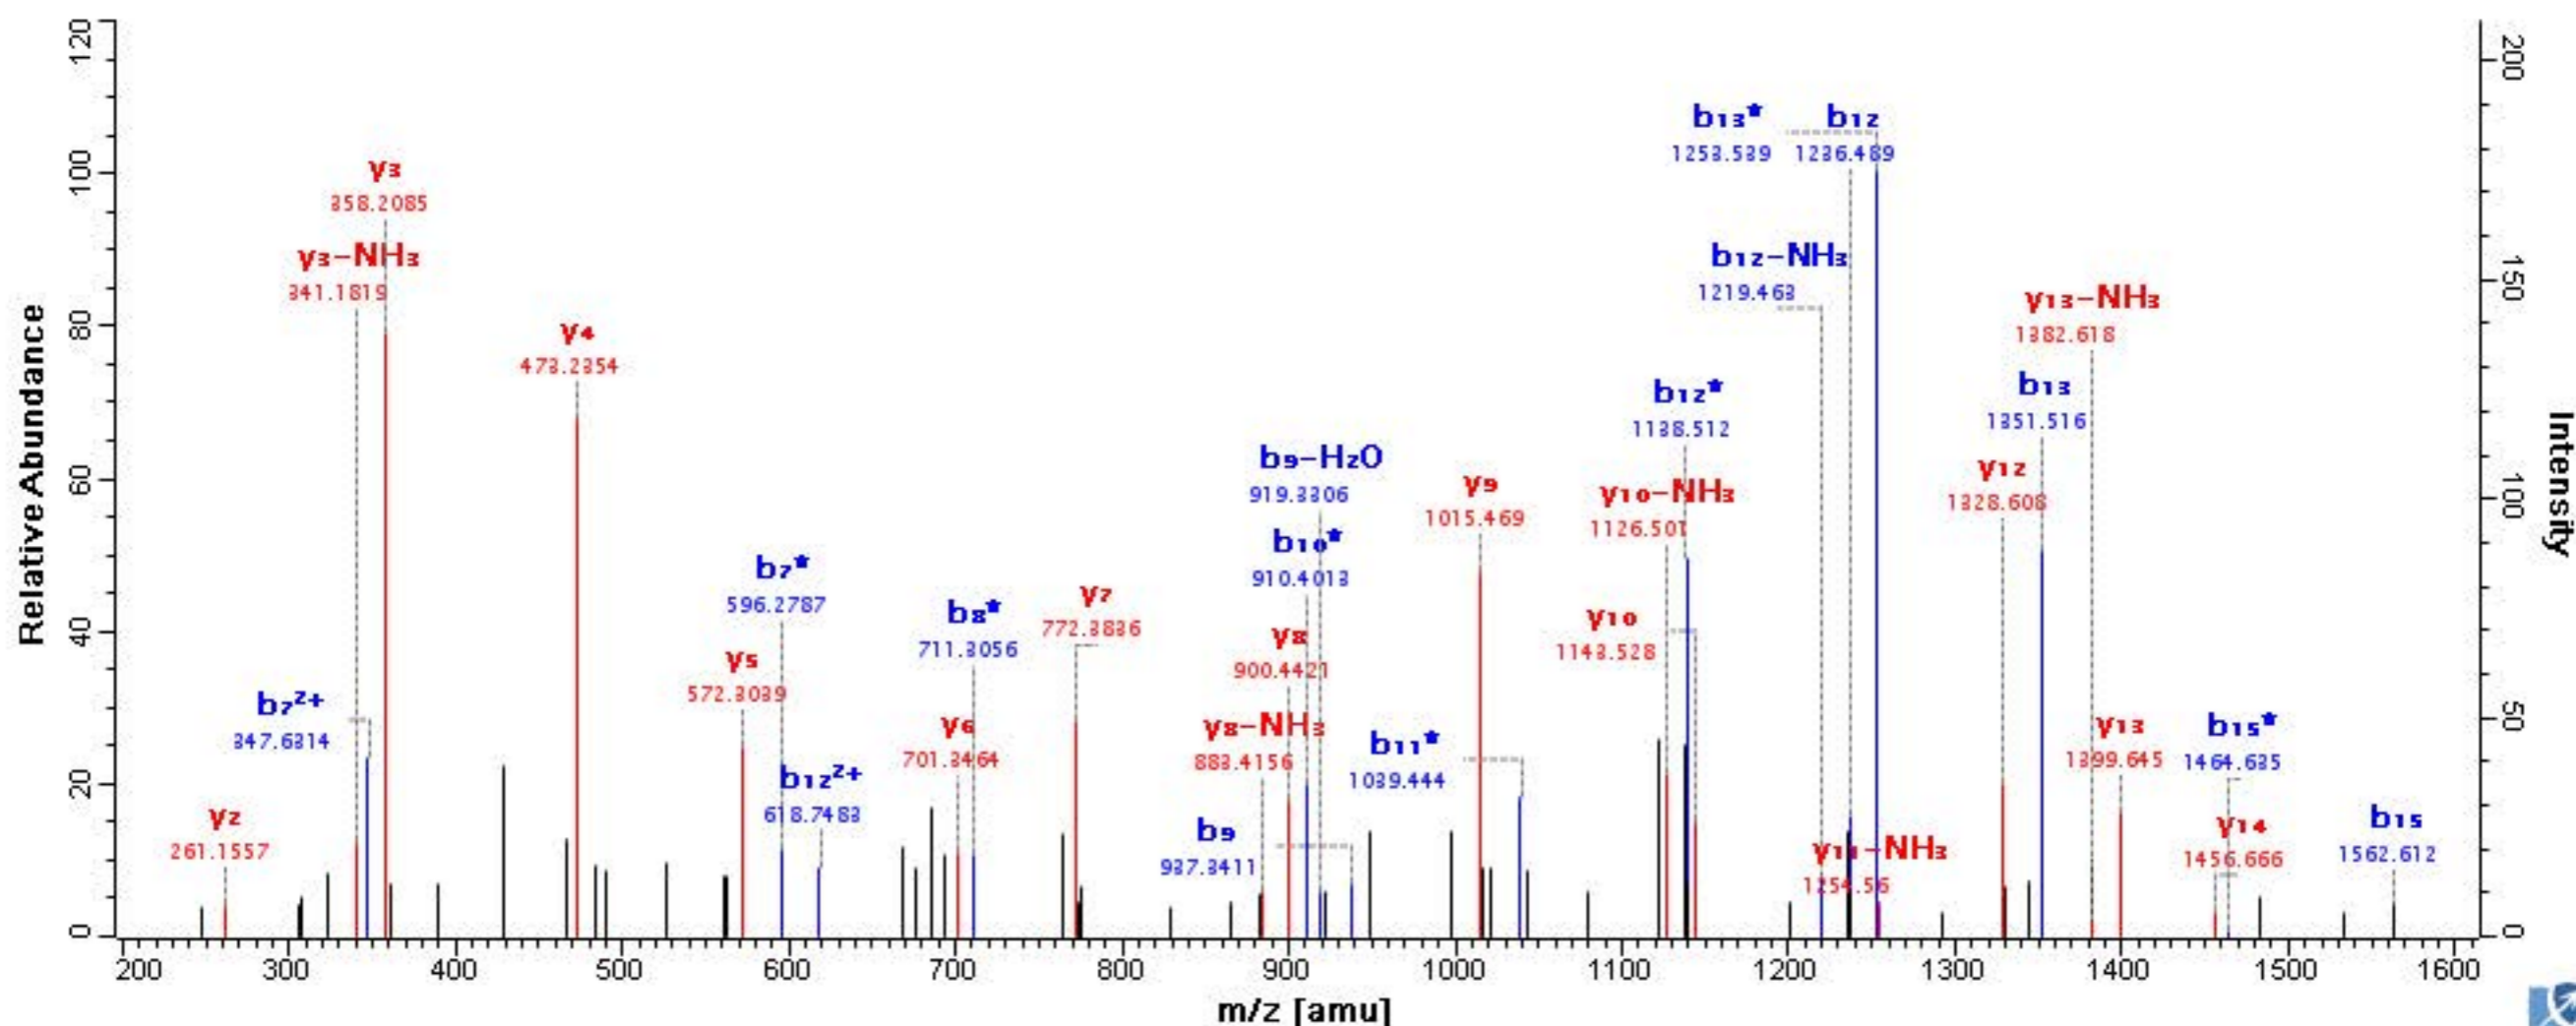

#### precursor information

|                   |                     |
|-------------------|---------------------|
| Mass:             | 1707.71006          |
| m/z:              | System.Collections. |
| Charge:           | System.Collections. |
| Retentiontime:    | System.Collections. |
| Score:            | 183.2319            |
| Mass Error [ppm]: | -0.037009           |
| PEP:              | 4.018E-35           |
| Precursor Type:   | MULTI               |

| b <sup>2+</sup> ion |              | b ion      |              |     | γ ion    |      |                         |
|---------------------|--------------|------------|--------------|-----|----------|------|-------------------------|
| Δ dalton            | mass         | Δ dalton   | mass         | seq | Δ dalton | mass |                         |
|                     | 72.044390254 |            | 72.044390254 | 1   | A        | 15   |                         |
|                     | 253.05839914 |            | 253.05839914 | 2   | T        | 14   | 1637.680285             |
|                     | 310.07986286 |            | 310.07986286 | 3   | G        | 13   | 1456.6662761 -0.0680095 |
|                     | 381.11697665 |            | 381.11697665 | 4   | A        | 12   | 1399.6448124 +0.0906613 |
|                     | 438.13844037 |            | 438.13844037 | 5   | G        | 11   | 1328.6076986 +0.1569498 |
|                     | 566.19701788 |            | 566.19701788 | 6   | Q        | 10   | 1271.5862349            |
| -0.4186063          | 347.63143593 |            | 694.2559539  | 7   | Q        | 9    | 1143.5276574 +0.0595008 |
|                     | 809.28253843 |            | 809.28253843 | 8   | D        | 8    | 1015.4690798 +0.0748044 |
|                     | 937.34111594 | -0.0991726 | 937.34111594 | 9   | Q        | 7    | 900.44213681 +0.0011615 |
|                     | 1008.3782297 |            | 1008.3782297 | 10  | A        | 6    | 772.3835593 +0.1675271  |
|                     | 1137.4208228 |            | 1137.4208228 | 11  | E        | 5    | 701.34644551 +0.1316429 |
| -0.4076194          | 618.7482566  | +0.1550504 | 1236.4892367 | 12  | V        | 4    | 572.30385242 +0.1294362 |
|                     | 1351.5161798 | +0.1609443 | 1351.5161798 | 13  | D        | 3    | 473.2354385 +0.0729721  |
|                     | 1448.5689436 |            | 1448.5689436 | 14  | P        | 2    | 358.20849547 +0.1318366 |
|                     | 1562.6118711 | +0.0614688 | 1562.6118711 | 15  | N        | 1    | 261.15573162 +0.0490718 |
|                     |              |            |              | 16  | K        | 0    | 147.11280417            |

#### general information

|                       |             |
|-----------------------|-------------|
| Annotation:           | 13 of 16    |
| AminoAcids Coverag    | 81 %        |
| Intensity Coverage:   | 64 %        |
| Protein Localisation: | 123 ... 138 |

Source: 20120514\_VR\_Bsu\_TripleSILACrep1\_pL2ESLS\_F20  
 Scannumber: 6402  
 Protein: BSU06030; groEL; groL; mopA  
 Peptide Score: 188.12  
 Method: ITMS; CID; 3

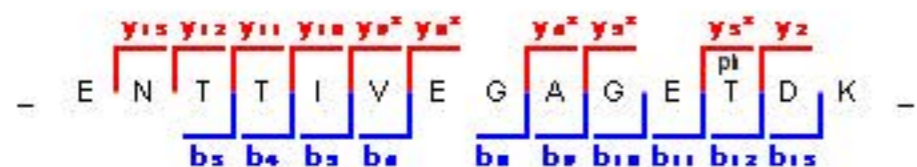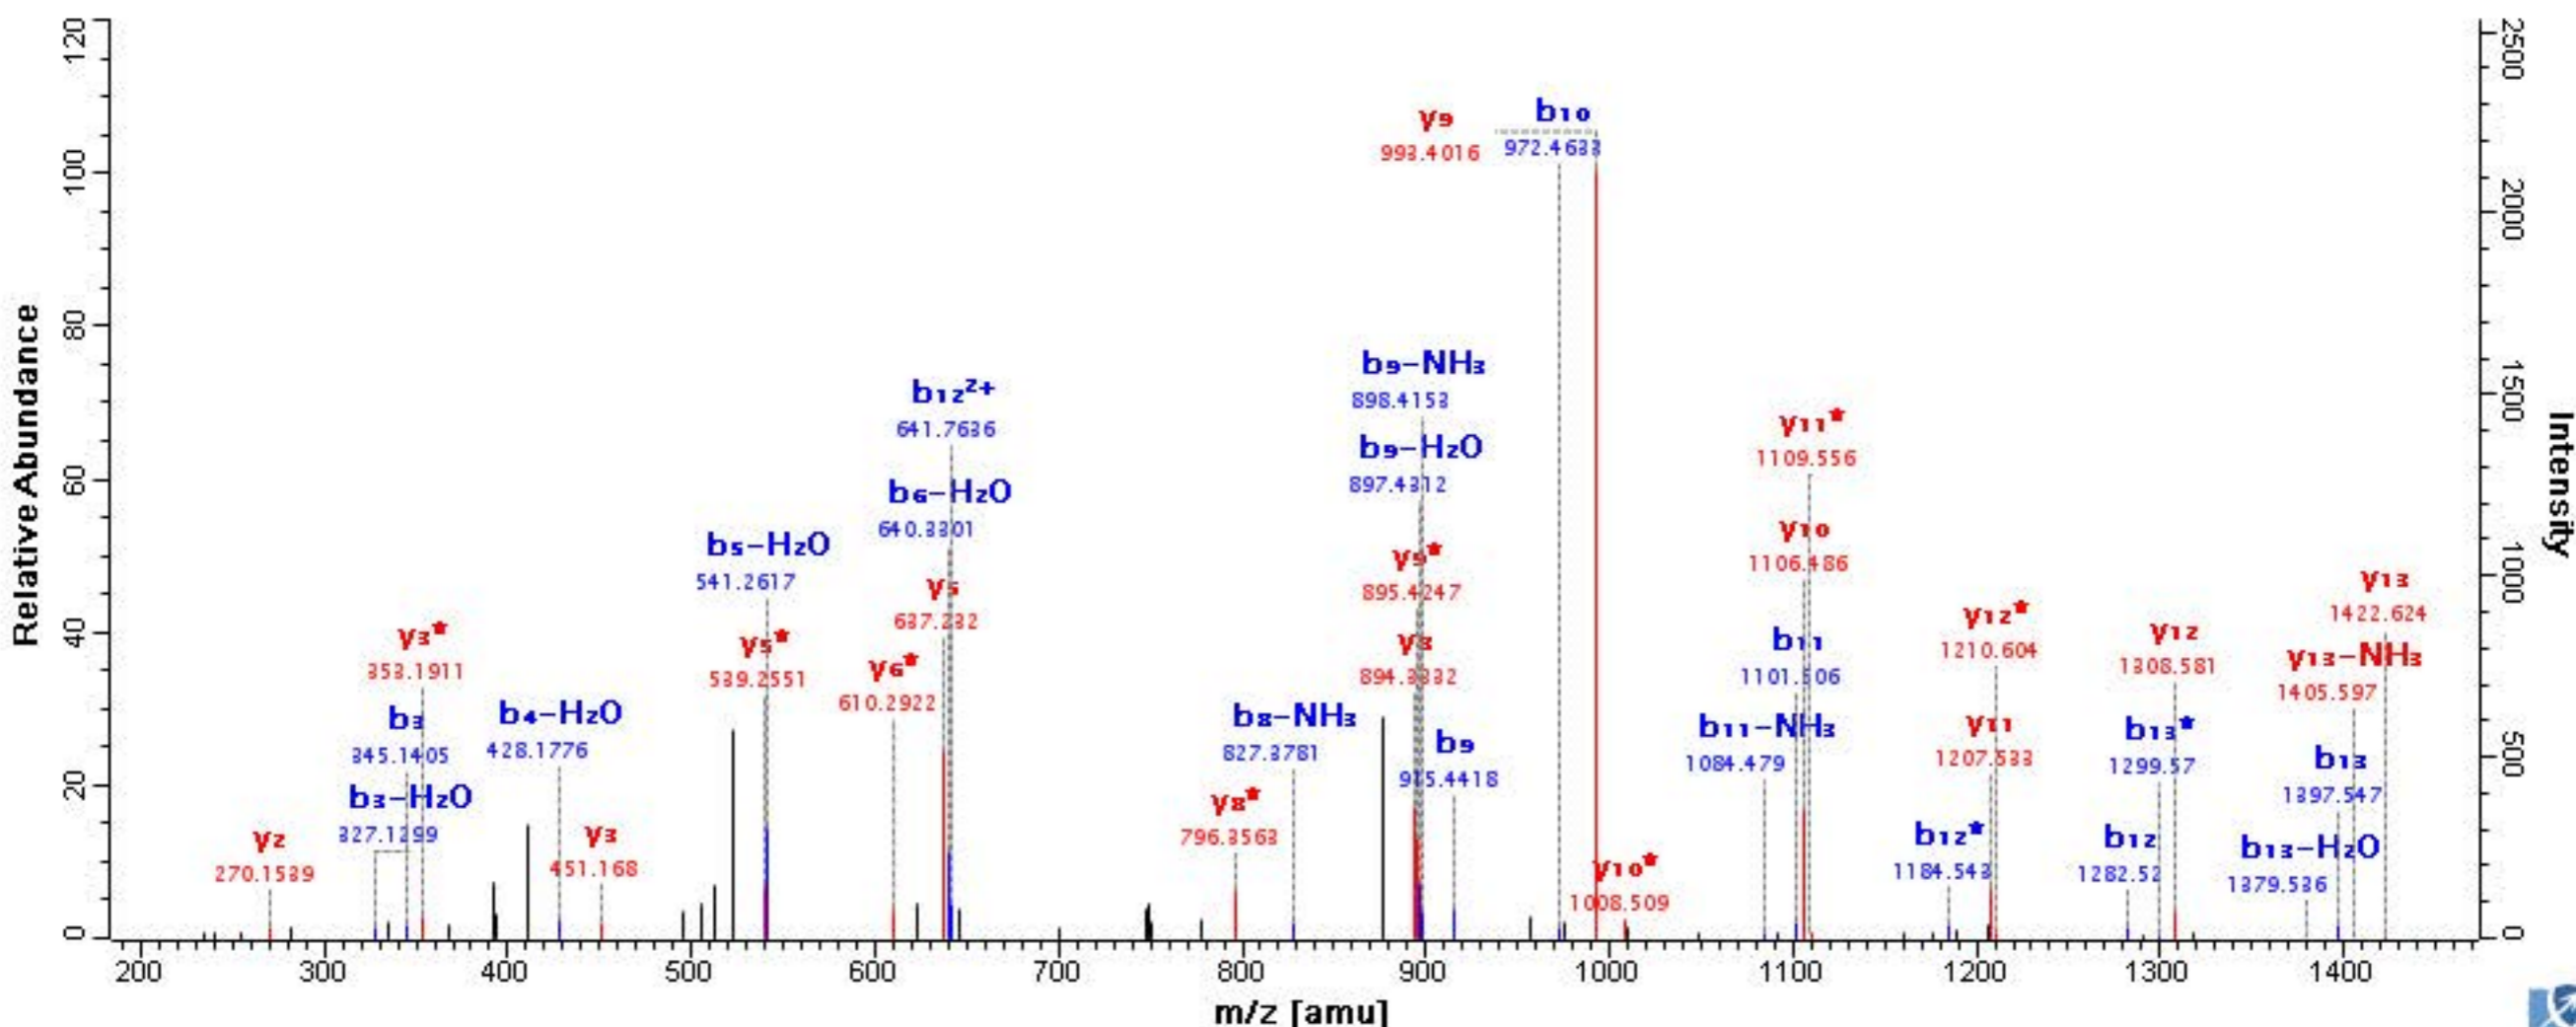

#### precursor information

|                   |                     |
|-------------------|---------------------|
| Mass:             | 1542.6451           |
| m/z:              | System.Collections. |
| Charge:           | System.Collections. |
| Retentiontime:    | System.Collections. |
| Score:            | 188.1244            |
| Mass Error [ppm]: | 0.026956            |
| PEP:              | 7.3928E-35          |
| Precursor Type:   | MULTI               |

#### general information

|                       |             |
|-----------------------|-------------|
| Annotation:           | 12 of 14    |
| AminoAcids Coverage:  | 86 %        |
| Intensity Coverage:   | 66 %        |
| Protein Localisation: | 326 ... 339 |

| b <sup>2+</sup> ion |              | b ion      |              | y ion |     |    |              |            |
|---------------------|--------------|------------|--------------|-------|-----|----|--------------|------------|
| Δ dalton            | mass         | Δ dalton   | mass         |       | seq |    | Δ dalton     | mass       |
|                     | 130.04986956 |            | 130.04986956 | 1     | E   | 13 |              |            |
|                     | 244.09279701 |            | 244.09279701 | 2     | N   | 12 | 1422.6239446 | +0.3483454 |
|                     | 345.14047548 | +0.0594147 | 345.14047548 | 3     | T   | 11 | 1308.5810172 | -0.032067  |
|                     | 446.18815396 |            | 446.18815396 | 4     | T   | 10 | 1207.5333387 | +0.0196398 |
|                     | 559.27221794 |            | 559.27221794 | 5     | I   | 9  | 1106.4856602 | +0.0751308 |
|                     | 658.34063185 |            | 658.34063185 | 6     | V   | 8  | 993.40159624 | +0.0210722 |
|                     | 787.38322495 |            | 787.38322495 | 7     | E   | 7  | 894.33318233 | +0.0404139 |
|                     | 844.40468867 |            | 844.40468867 | 8     | G   | 6  | 765.29058923 |            |
|                     | 915.44180246 | -0.0374446 | 915.44180246 | 9     | A   | 5  | 708.26912551 |            |
|                     | 972.46326619 | -0.0718477 | 972.46326619 | 10    | G   | 4  | 637.23201172 | -0.0233936 |
|                     | 1101.5058593 | -0.0324706 | 1101.5058593 | 11    | E   | 3  | 580.21054799 |            |
| -0.327232           | 641.76357232 | -0.0214551 | 1282.5198682 | 12    | T   | 2  | 451.1679549  | +0.0552507 |
|                     | 1397.5468112 | -0.0349704 | 1397.5468112 | 13    | D   | 1  | 270.15394602 | +0.089218  |
|                     |              |            |              | 14    | K   | 0  | 155.12700298 |            |

Source: 20120514\_VR\_Bsu\_TripleSILACrep1\_pL2ESLS\_F20  
 Scannumber: 8163  
 Protein: BSU22070; xpt  
 Peptide Score: 139.43  
 Method: ITMS; CID; 3

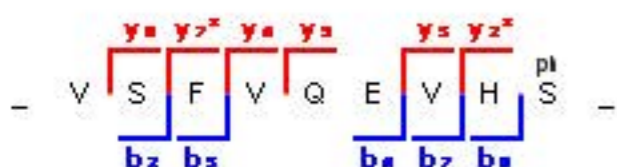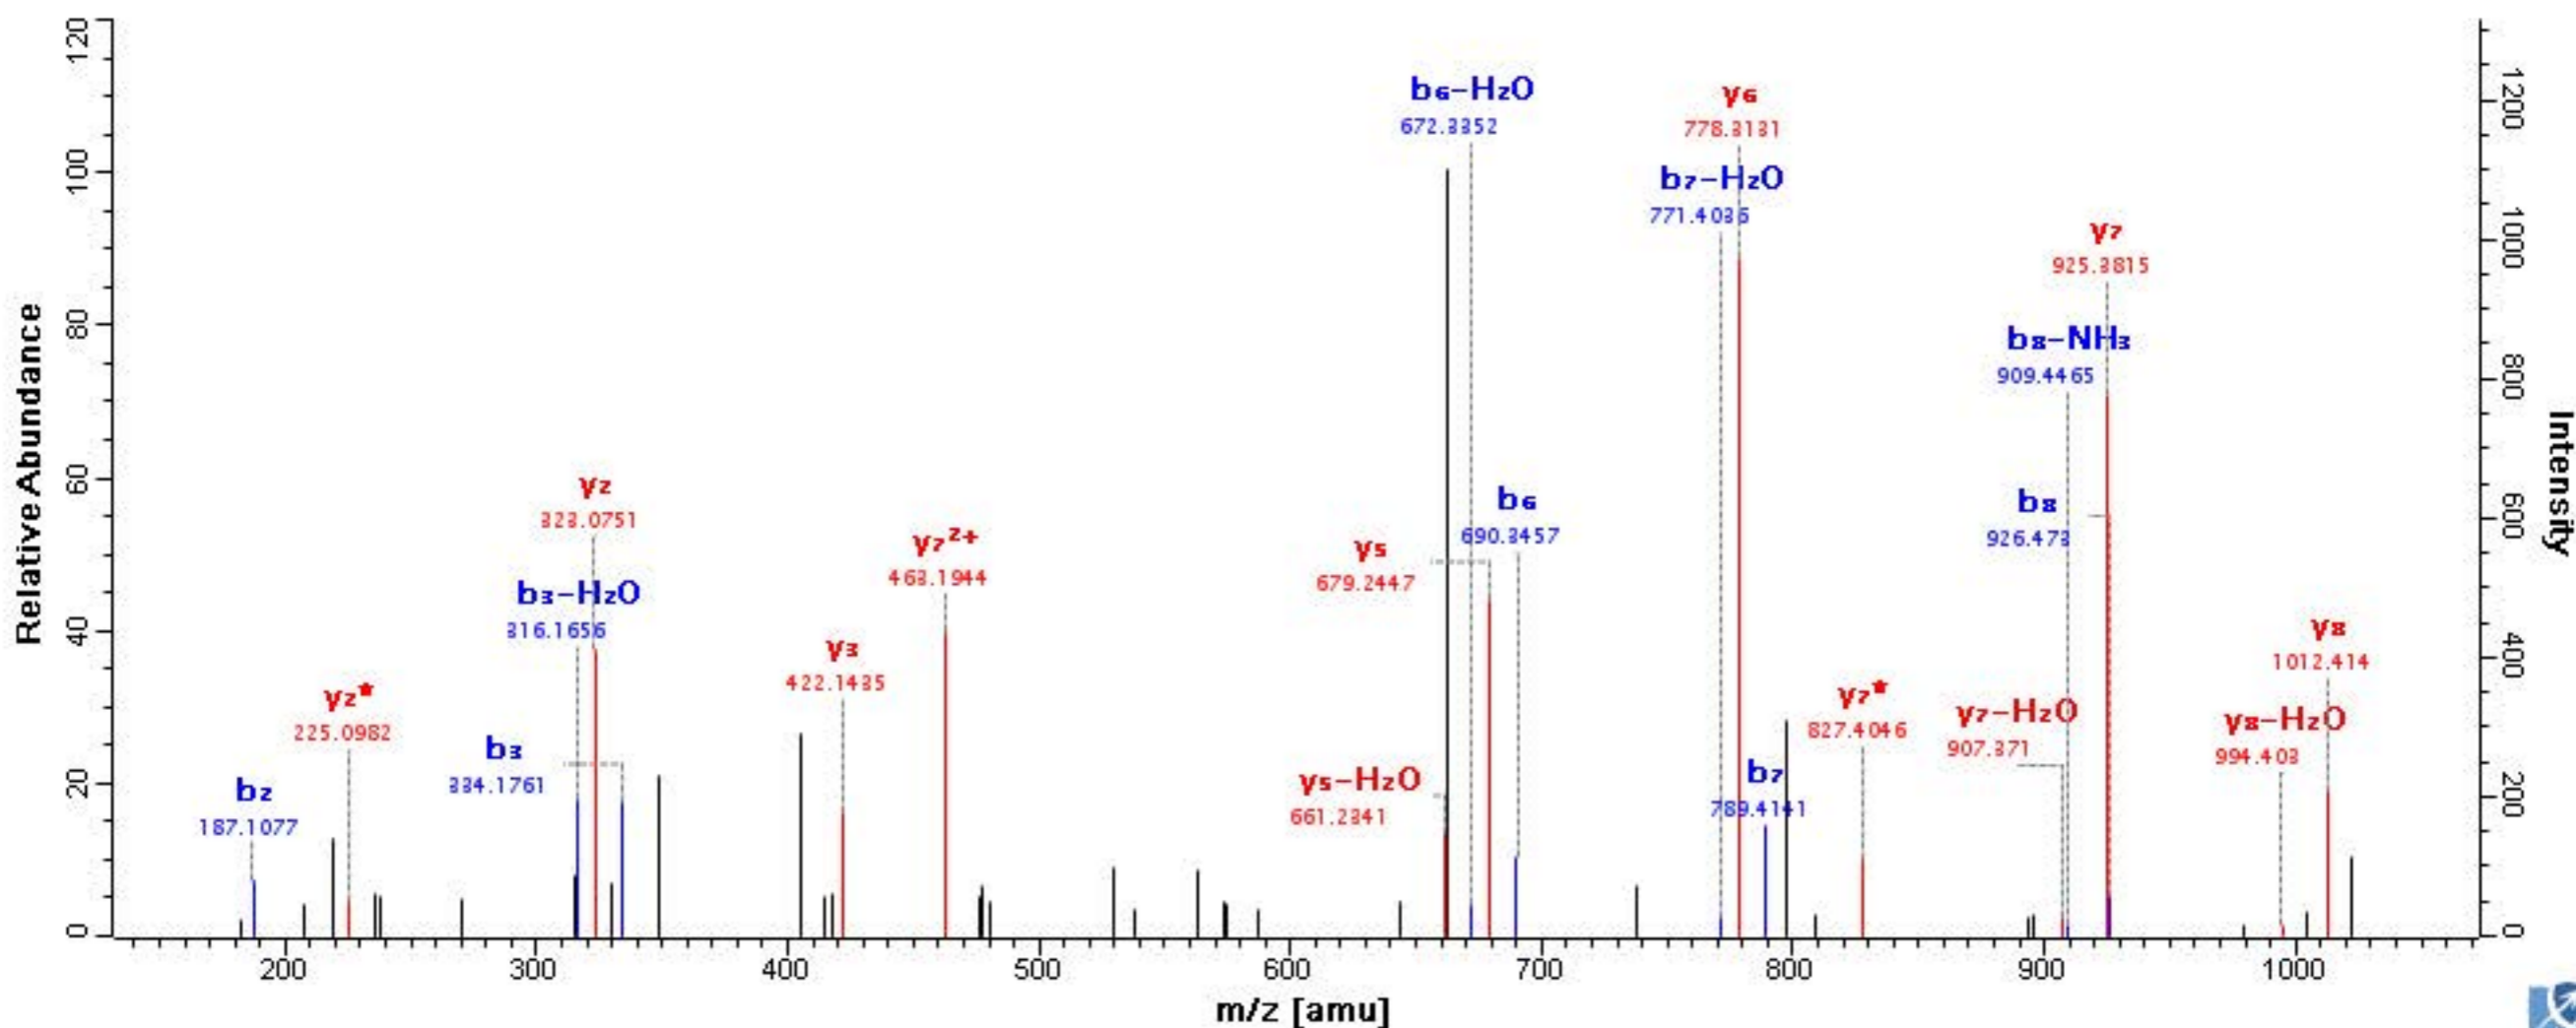

#### precursor information

|                       |                     |
|-----------------------|---------------------|
| Mass:                 | 1110.47515          |
| m/z:                  | System.Collections. |
| Charge:               | System.Collections. |
| Retentiontime:        | System.Collections. |
| Score:                | 139.4331            |
| Mass Error [ppm]:     | 0.41653             |
| PEP:                  | 3.306E-11           |
| g Precursor Type:     | ISO                 |
| Annotation:           | 7 of 9              |
| AminoAcids Coverag    | 78 %                |
| Intensity Coverage:   | 57 %                |
| Protein Localisation: | 186 ... 194         |

| b ion      |              |   |     |   | γ ion        |            | γ <sup>2+</sup> ion |           |
|------------|--------------|---|-----|---|--------------|------------|---------------------|-----------|
| Δ dalton   | mass         |   | seq |   | Δ dalton     | mass       | Δ dalton            | mass      |
|            | 100.07569038 | 1 | V   | 8 |              |            |                     |           |
| +0.0596243 | 187.10771879 | 2 | S   | 7 | 1012.4135526 | +0.0615451 | 1012.4135526        |           |
| -0.1025243 | 334.17613271 | 3 | F   | 6 | 925.38152419 | -0.0029231 | 463.19440033        | +0.045712 |
|            | 433.24454663 | 4 | V   | 5 | 778.31311027 | +0.0269776 | 778.31311027        |           |
|            | 561.30312414 | 5 | Q   | 4 | 679.24469636 | +0.089288  | 679.24469636        |           |
| -0.1375263 | 690.34571723 | 6 | E   | 3 | 551.18611885 |            | 551.18611885        |           |
| -0.2285232 | 789.41413115 | 7 | V   | 2 | 422.14352575 | +0.0687545 | 422.14352575        |           |
| -0.2865806 | 926.47304301 | 8 | H   | 1 | 323.07511183 | +0.0781474 | 323.07511183        |           |
|            |              | 9 | S   | 0 | 186.01619997 |            | 186.01619997        |           |

Source: 20120514\_VR\_Bsu\_TripleSILACrep1\_pL2ESLS\_F20  
 Scannumber: 8279  
 Protein: ath; BSU06500; purM  
 Peptide Score: 132.59  
 Method: ITMS; CID; 3

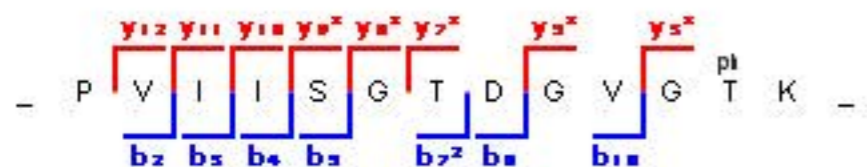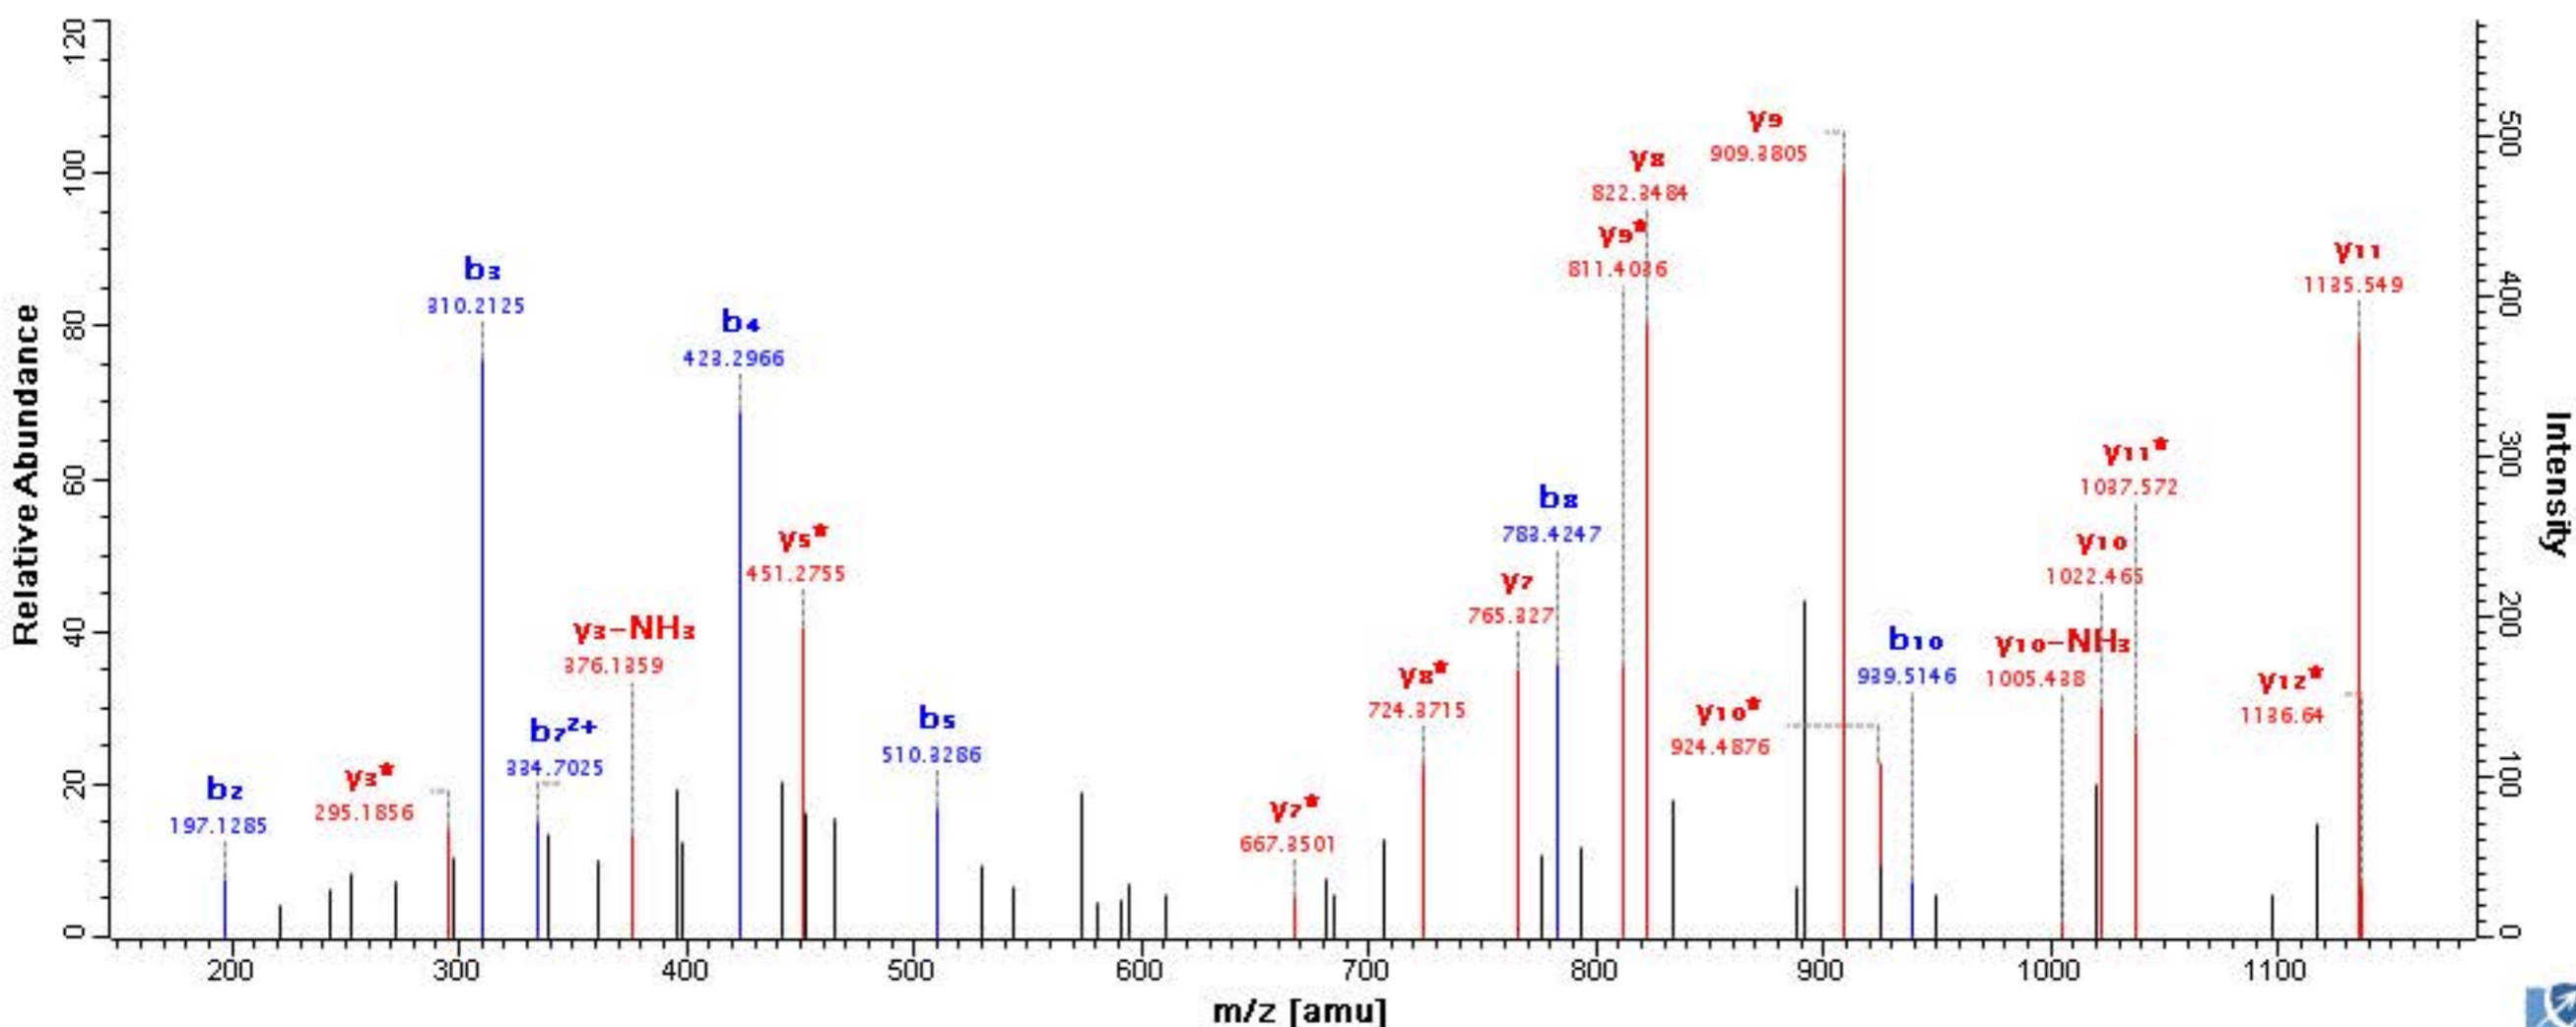

**precursor information**

|                   |                     |
|-------------------|---------------------|
| Mass:             | 1322.64844          |
| m/z:              | System.Collections. |
| Charge:           | System.Collections. |
| Retentiontime:    | System.Collections. |
| Score:            | 132.5867            |
| Mass Error [ppm]: | 0.10885             |
| PEP:              | 1.6815E-07          |
| Precursor Type:   | MULTI               |

**general information**

|                       |           |
|-----------------------|-----------|
| Annotation:           | 10 of 13  |
| AminoAcids Coverag    | 77 %      |
| Intensity Coverage:   | 66 %      |
| Protein Localisation: | 55 ... 67 |

| b <sup>2+</sup> ion |              | b ion      |              |    |     |    | γ ion        |            |
|---------------------|--------------|------------|--------------|----|-----|----|--------------|------------|
| Δ dalton            | mass         | Δ dalton   | mass         |    | seq |    | Δ dalton     | mass       |
|                     | 98.060040319 |            | 98.060040319 | 1  | P   | 12 |              |            |
|                     | 197.12845423 | +0.127222  | 197.12845423 | 2  | V   | 11 | 1234.6170087 |            |
|                     | 310.21251822 | +0.0262513 | 310.21251822 | 3  | I   | 10 | 1135.5485948 | +0.0237929 |
|                     | 423.2965822  | +0.0101195 | 423.2965822  | 4  | I   | 9  | 1022.4645308 | -0.0164718 |
|                     | 510.32861061 | +0.10303   | 510.32861061 | 5  | S   | 8  | 909.38046687 | +0.0609394 |
|                     | 567.35007433 |            | 567.35007433 | 6  | G   | 7  | 822.34843846 | +0.0871084 |
| -0.2511902          | 334.70251463 |            | 668.3977528  | 7  | T   | 6  | 765.32697474 | +0.1419584 |
|                     | 783.42469584 | +0.0674306 | 783.42469584 | 8  | D   | 5  | 664.27929626 |            |
|                     | 840.44615956 |            | 840.44615956 | 9  | G   | 4  | 549.25235323 |            |
|                     | 939.51457348 | +0.0784441 | 939.51457348 | 10 | V   | 3  | 492.23088951 |            |
|                     | 996.5360372  |            | 996.5360372  | 11 | G   | 2  | 393.16247559 |            |
|                     | 1177.5500461 |            | 1177.5500461 | 12 | T   | 1  | 336.14101187 |            |
|                     |              |            |              | 13 | K   | 0  | 155.12700298 |            |



Source: 20120514\_VR\_Bsu\_TripleSILACrep1\_pL2ESLS\_F20  
 Scannumber: 8399  
 Protein: BSU14670; suhB; yktC  
 Peptide Score: 160.69  
 Method: ITMS; CID; 3

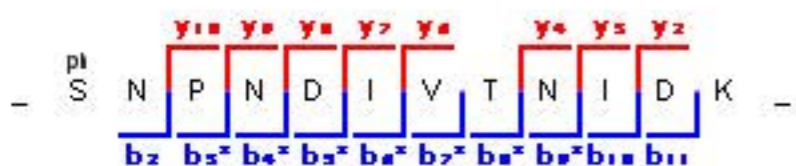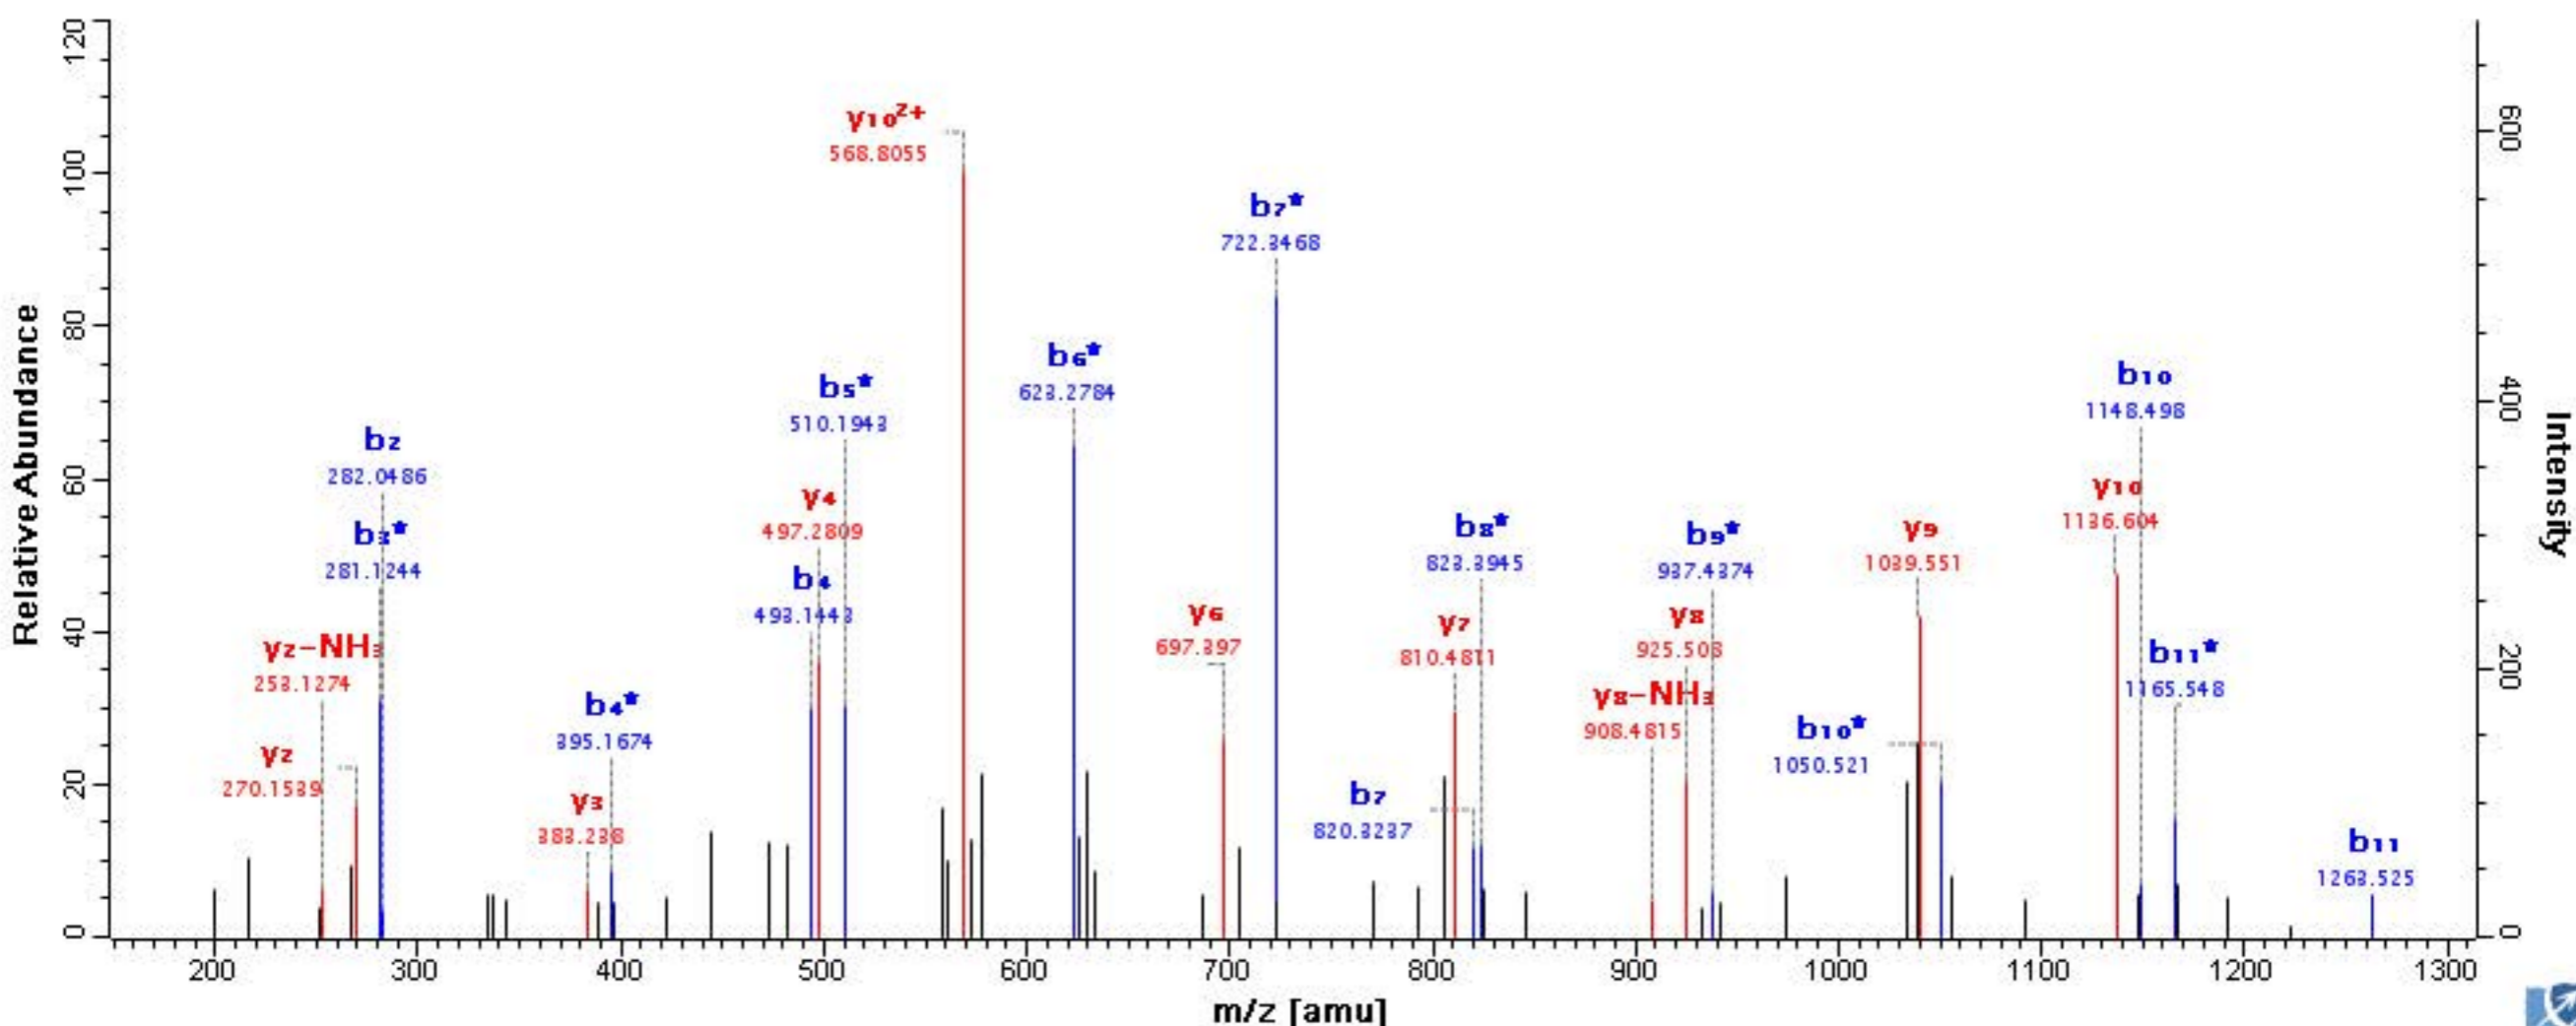

#### precursor information

|                   |                     |
|-------------------|---------------------|
| Mass:             | 1408.62377          |
| m/z:              | System.Collections. |
| Charge:           | System.Collections. |
| Retentiontime:    | System.Collections. |
| Score:            | 160.6851            |
| Mass Error [ppm]: | 0.16473             |
| PEP:              | 4.5388E-19          |
| Precursor Type:   | MULTI               |

#### general information

|                       |           |
|-----------------------|-----------|
| Annotation:           | 10 of 12  |
| AminoAcids Coverag    | 83 %      |
| Intensity Coverage:   | 64 %      |
| Protein Localisation: | 36 ... 47 |

| b ion           |              |    |     |    | y ion           |            | $y^{2+}$ ion    |           |
|-----------------|--------------|----|-----|----|-----------------|------------|-----------------|-----------|
| $\Delta$ dalton | mass         |    | seq |    | $\Delta$ dalton | mass       | $\Delta$ dalton | mass      |
|                 | 168.00563528 | 1  | S   | 11 |                 |            |                 |           |
| -0.1091401      | 282.04856273 | 2  | N   | 10 | 1250.6466556    |            | 1250.6466556    |           |
|                 | 379.10132658 | 3  | P   | 9  | 1136.6037281    | +0.2480785 | 568.80550231    | +0.042337 |
| +0.0628993      | 493.14425403 | 4  | N   | 8  | 1039.5509643    | +0.289856  | 1039.5509643    |           |
|                 | 608.17119706 | 5  | D   | 7  | 925.50803685    | -0.0973923 | 925.50803685    |           |
|                 | 721.25526104 | 6  | I   | 6  | 810.48109381    | -0.1156763 | 810.48109381    |           |
| +0.0275824      | 820.32367496 | 7  | V   | 5  | 697.39702983    | +0.2169838 | 697.39702983    |           |
|                 | 921.37135343 | 8  | T   | 4  | 598.32861592    |            | 598.32861592    |           |
|                 | 1035.4142809 | 9  | N   | 3  | 497.28093744    | +0.1544263 | 497.28093744    |           |
| +0.1928172      | 1148.4983449 | 10 | I   | 2  | 383.23801       | +0.0711331 | 383.23801       |           |
| +0.0546682      | 1263.5252879 | 11 | D   | 1  | 270.15394602    | +0.0132598 | 270.15394602    |           |
|                 |              | 12 | K   | 0  | 155.12700298    |            | 155.12700298    |           |

Source: 20120514\_VR\_Bsu\_TripleSILACrep1\_pL2ESLS\_F20  
 Scannumber: 8982  
 Protein: abrB; BSU00370; cpsX  
 Peptide Score: 162.36  
 Method: ITMS; CID; 3

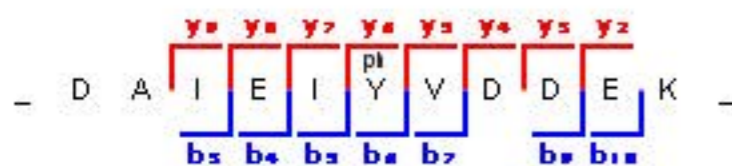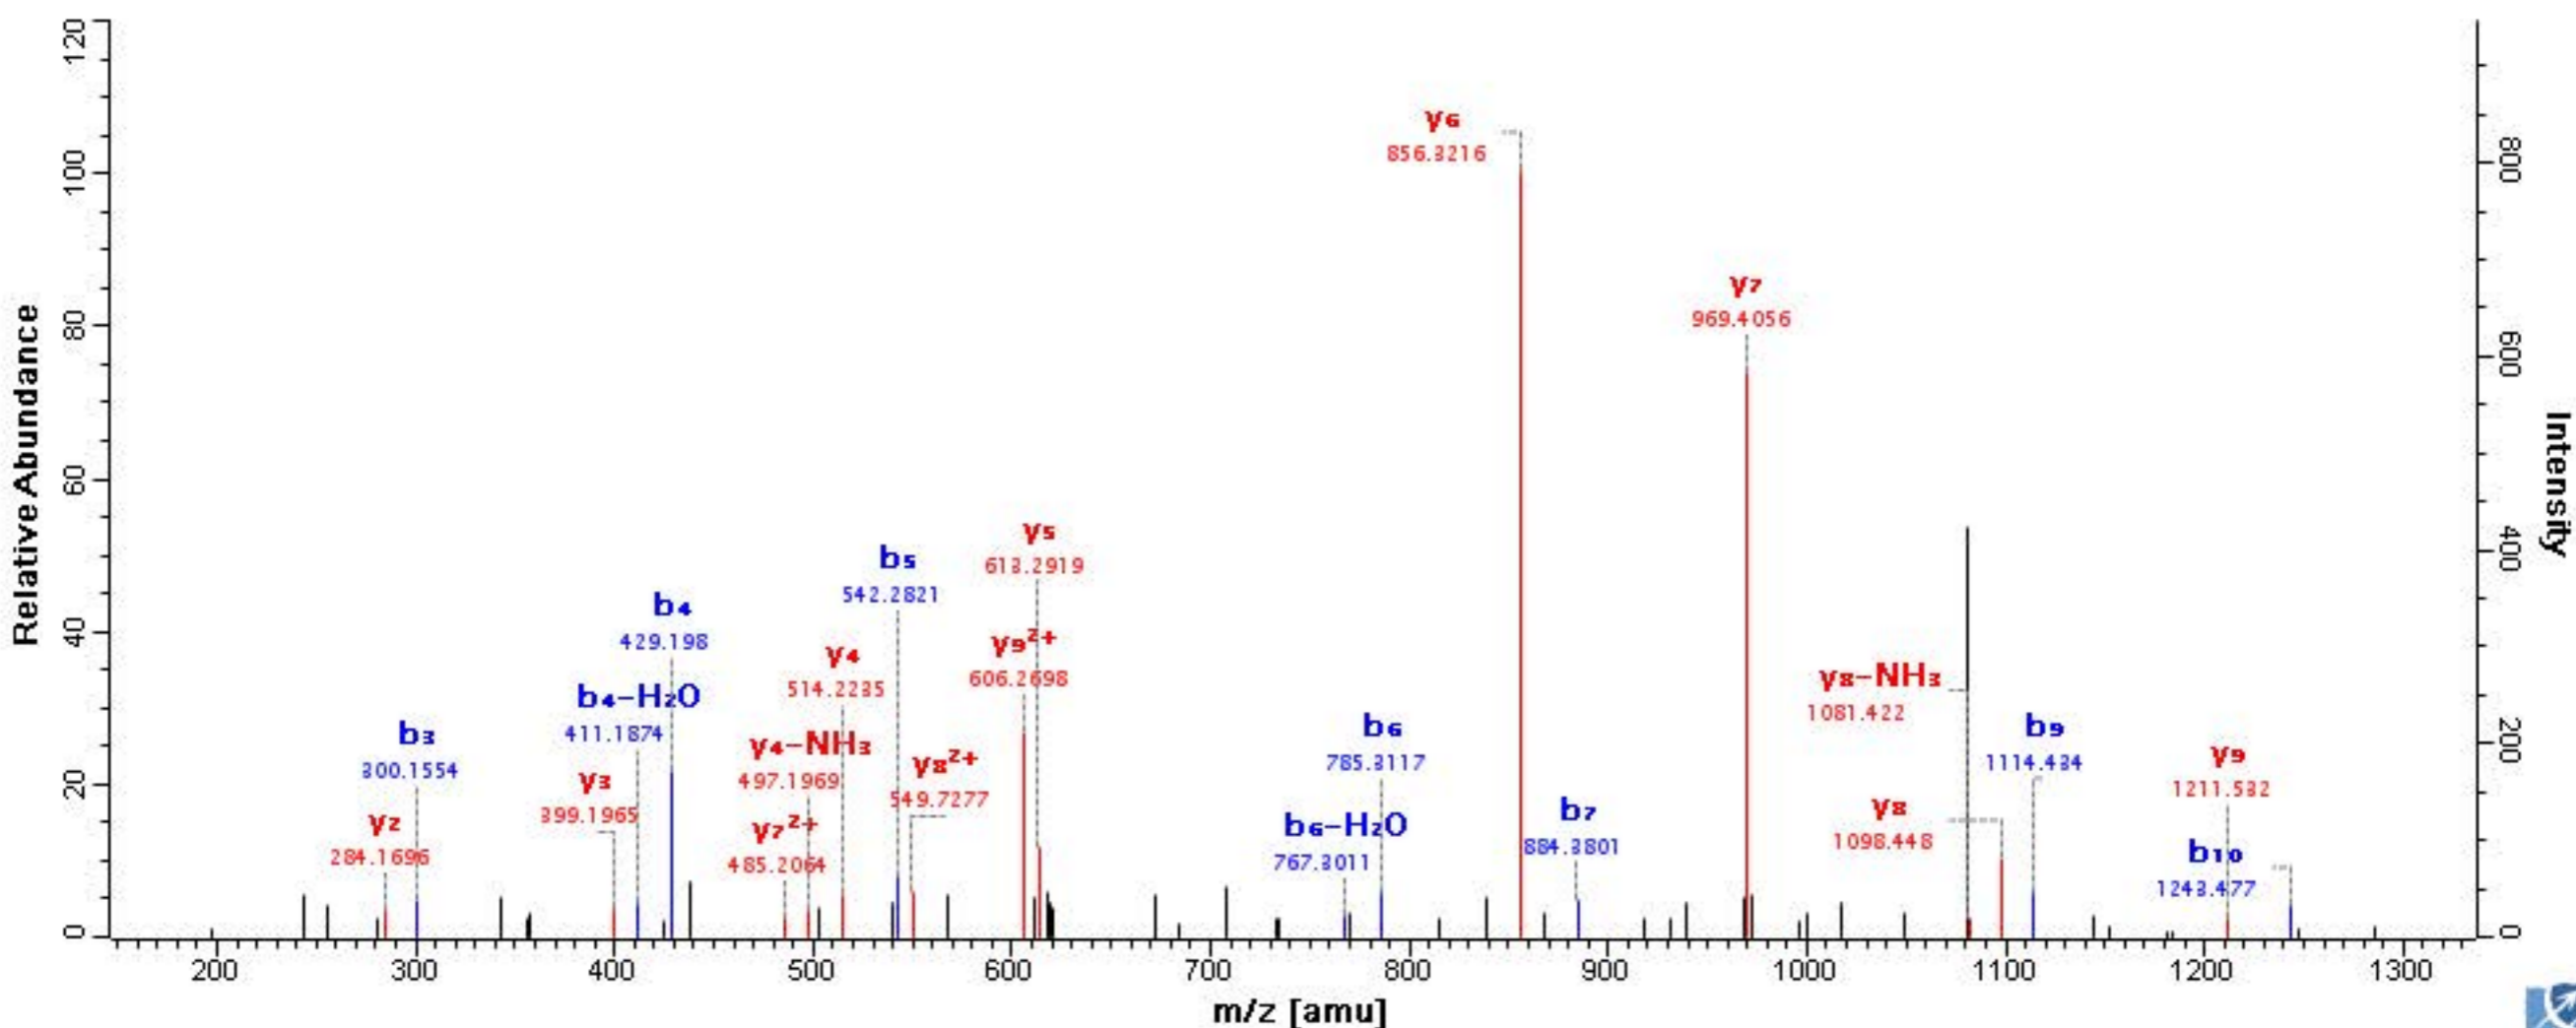

**precursor information**

|                   |                     |
|-------------------|---------------------|
| Mass:             | 1388.57536          |
| m/z:              | System.Collections. |
| Charge:           | System.Collections. |
| Retentiontime:    | System.Collections. |
| Score:            | 162.3578            |
| Mass Error [ppm]: | 0.36146             |
| PEP:              | 5.5744E-17          |
| Precursor Type:   | MULTI               |

**general information**

|                       |           |
|-----------------------|-----------|
| Annotation:           | 8 of 11   |
| AminoAcids Coverage:  | 73 %      |
| Intensity Coverage:   | 61 %      |
| Protein Localisation: | 34 ... 44 |

| b ion      |              |    |     |    | y ion        |            | y <sup>2+</sup> ion |            |
|------------|--------------|----|-----|----|--------------|------------|---------------------|------------|
| Δ dalton   | mass         |    | seq |    | Δ dalton     | mass       | Δ dalton            | mass       |
|            | 116.0342195  | 1  | D   | 10 |              |            |                     |            |
|            | 187.07133329 | 2  | A   | 9  | 1282.5693899 |            | 1282.5693899        |            |
| +0.0476972 | 300.15539727 | 3  | I   | 8  | 1211.5322761 | -0.0288581 | 606.26977627        | -0.0397958 |
| +0.0072709 | 429.19799036 | 4  | E   | 7  | 1098.4482121 | -0.1547551 | 549.72774428        | +0.1612328 |
| +0.0403334 | 542.28205434 | 5  | I   | 6  | 969.40561899 | +0.0600182 | 485.20644773        | +0.2360572 |
| +0.1148614 | 785.31171329 | 6  | Y   | 5  | 856.32155501 | -0.0070408 | 856.32155501        |            |
| +0.0902707 | 884.38012721 | 7  | V   | 4  | 613.29189606 | +0.0195663 | 613.29189606        |            |
|            | 999.40707024 | 8  | D   | 3  | 514.22348214 | -0.0935993 | 514.22348214        |            |
| -0.1956099 | 1114.4340133 | 9  | D   | 2  | 399.19653911 | +0.1487368 | 399.19653911        |            |
| -0.0184765 | 1243.4766064 | 10 | E   | 1  | 284.16959608 | +0.2104698 | 284.16959608        |            |
|            |              | 11 | K   | 0  | 155.12700298 |            | 155.12700298        |            |

Source: 20120514\_VR\_Bsu\_TripleSILACrep1\_pL2ESLS\_F21  
 Scannumber: 10081  
 Protein: BSU16500; tsf  
 Peptide Score: 168.64  
 Method: ITMS; CID; 3

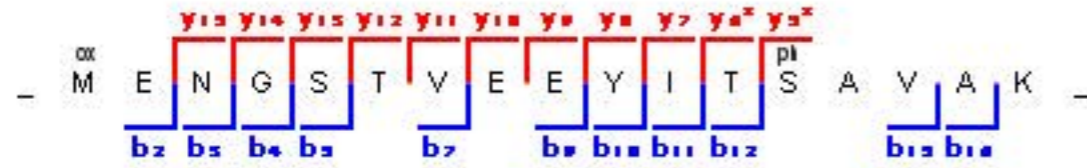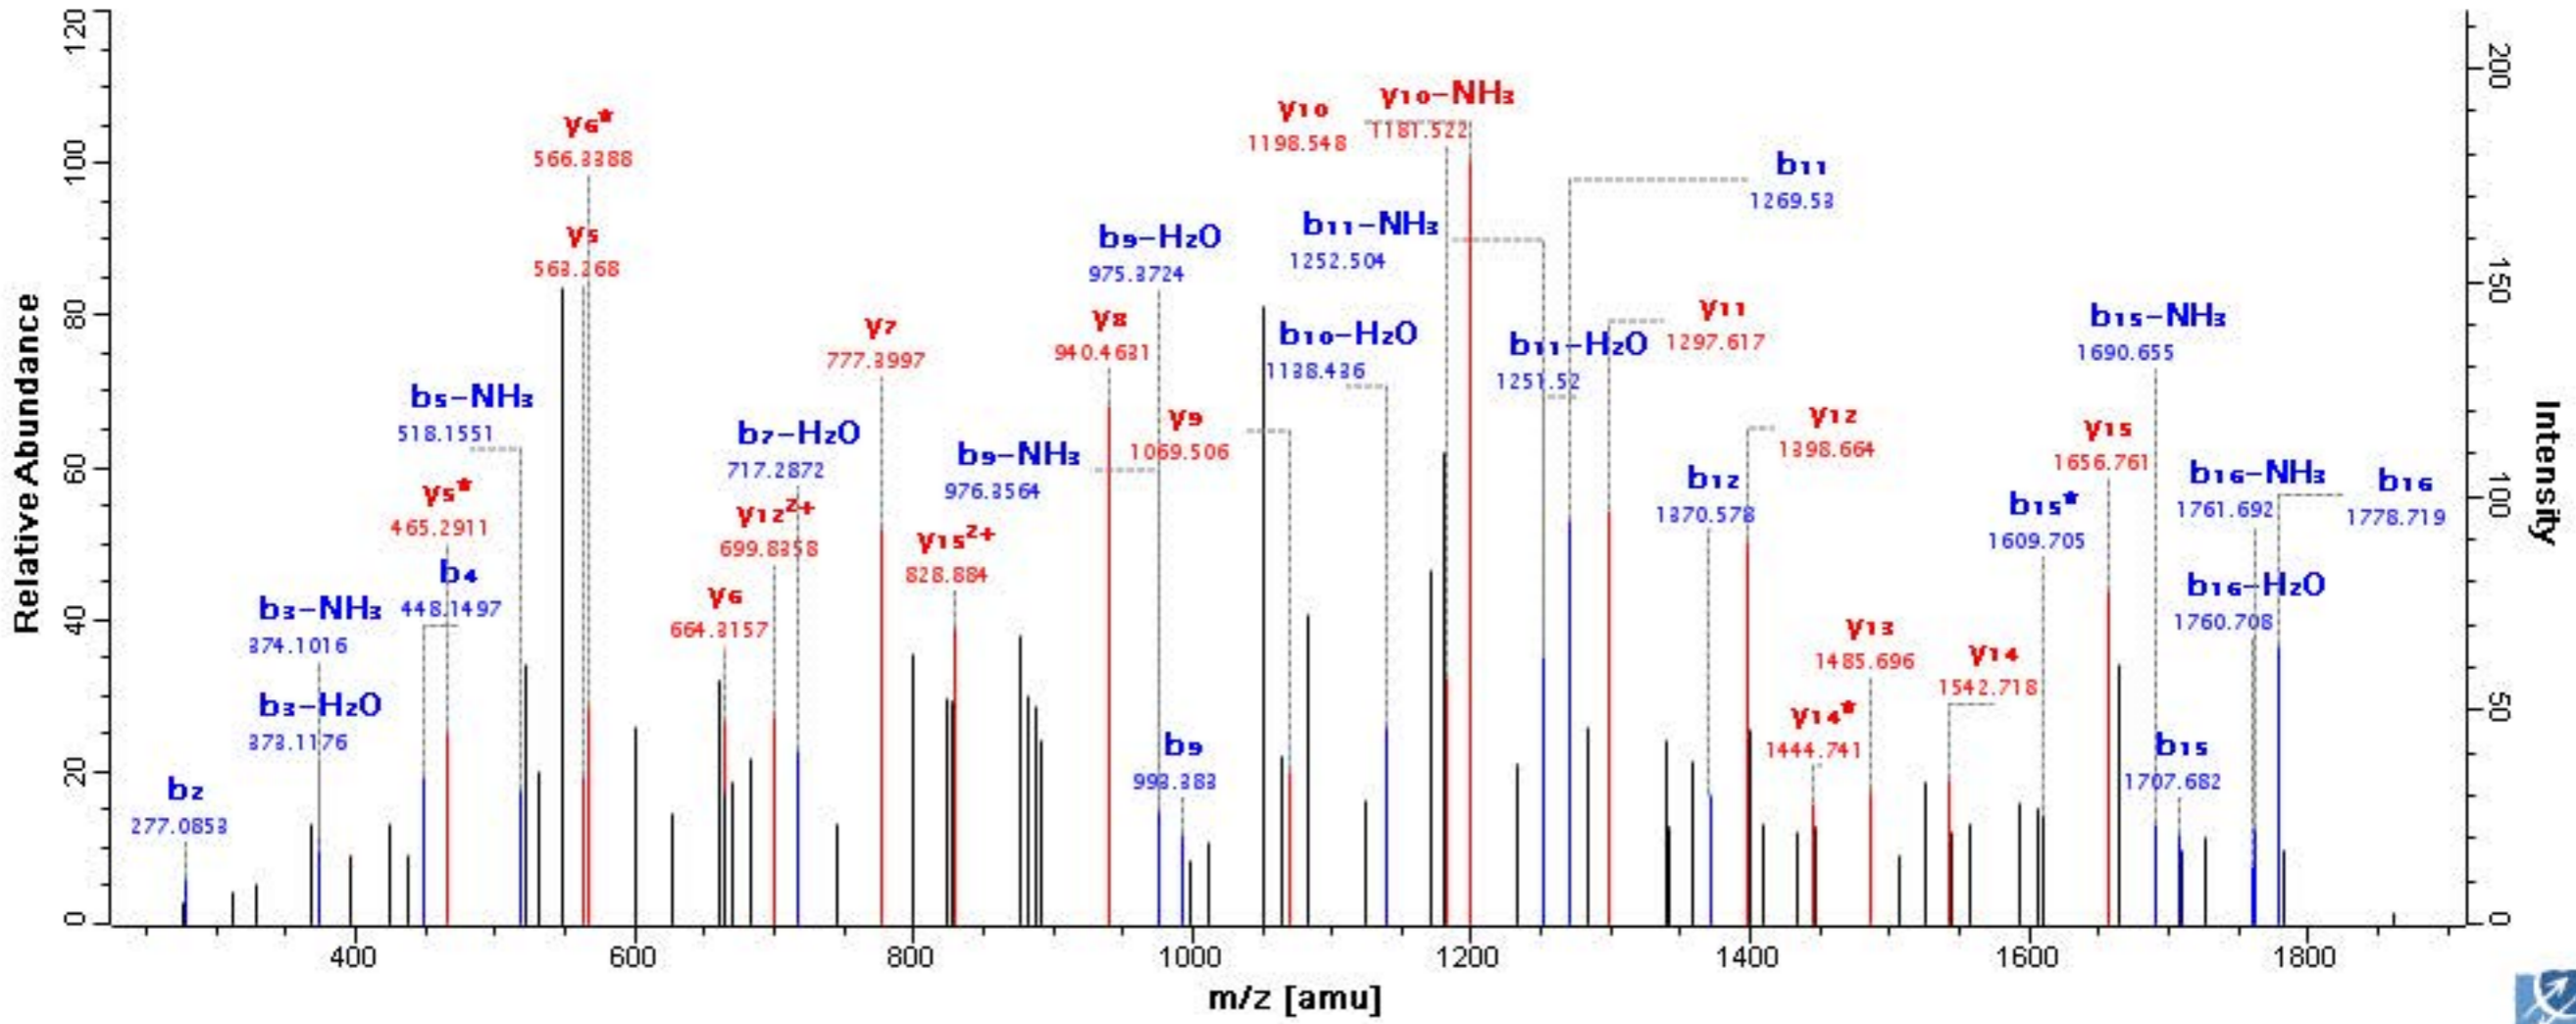

precursor information

|                   |                     |
|-------------------|---------------------|
| Mass:             | 1923.81798          |
| m/z:              | System.Collections. |
| Charge:           | System.Collections. |
| Retentiontime:    | System.Collections. |
| Score:            | 168.6398            |
| Mass Error [ppm]: | 0.35881             |
| PEP:              | 2.2298E-27          |
| Precursor Type:   | MULTI               |

| b ion      |              |    |     |    | y ion        |            | y <sup>2+</sup> ion |            |
|------------|--------------|----|-----|----|--------------|------------|---------------------|------------|
| Δ dalton   | mass         |    | seq |    | Δ dalton     | mass       | Δ dalton            | mass       |
|            | 148.04267569 | 1  | M   | 16 |              |            |                     |            |
| -0.1148708 | 277.08526879 | 2  | E   | 15 | 1785.8033655 |            | 1785.8033655        |            |
|            | 391.12819624 | 3  | N   | 14 | 1656.7607725 | +0.0069277 | 828.88402446        | +0.2099086 |
| +0.35034   | 448.14965996 | 4  | G   | 13 | 1542.717845  | +0.1124773 | 1542.717845         |            |
|            | 535.18168837 | 5  | S   | 12 | 1485.6963813 | +0.156524  | 1485.6963813        |            |
|            | 636.22936685 | 6  | T   | 11 | 1398.6643529 | +0.0928493 | 699.83581467        | -0.4306023 |
|            | 735.29778076 | 7  | V   | 10 | 1297.6166744 | +0.0476322 | 1297.6166744        |            |
|            | 864.34037386 | 8  | E   | 9  | 1198.5482605 | +0.0861389 | 1198.5482605        |            |
| +0.1826458 | 993.38296695 | 9  | E   | 8  | 1069.5056674 | +0.0729459 | 1069.5056674        |            |
|            | 1156.4462955 | 10 | Y   | 7  | 940.46307429 | +0.1384882 | 940.46307429        |            |
| +0.0143183 | 1269.5303595 | 11 | I   | 6  | 777.39974575 | -0.0429953 | 777.39974575        |            |
| +0.2282365 | 1370.5780379 | 12 | T   | 5  | 664.31568177 | -0.1653522 | 664.31568177        |            |
|            | 1537.5763968 | 13 | S   | 4  | 563.26800329 | -0.0009135 | 563.26800329        |            |
|            | 1608.6135106 | 14 | A   | 3  | 396.26964448 |            | 396.26964448        |            |
| +0.0683197 | 1707.6819245 | 15 | V   | 2  | 325.23253069 |            | 325.23253069        |            |
| +0.0561082 | 1778.7190383 | 16 | A   | 1  | 226.16411677 |            | 226.16411677        |            |
|            |              | 17 | K   | 0  | 155.12700298 |            | 155.12700298        |            |

general information

|                       |             |
|-----------------------|-------------|
| Annotation:           | 14 of 17    |
| AminoAcids Coverag    | 82 %        |
| Intensity Coverage:   | 46 %        |
| Protein Localisation: | 115 ... 131 |

Source: 20120514\_VR\_Bsu\_TripleSILACrep1\_pL2ESLS\_F21  
 Scannumber: 10646  
 Protein: BSU02360; gamA; ybfT  
 Peptide Score: 153.72  
 Method: ITMS; CID; 3

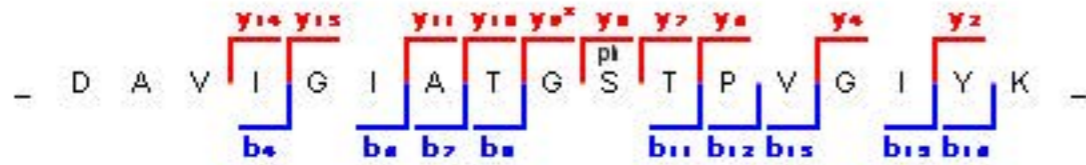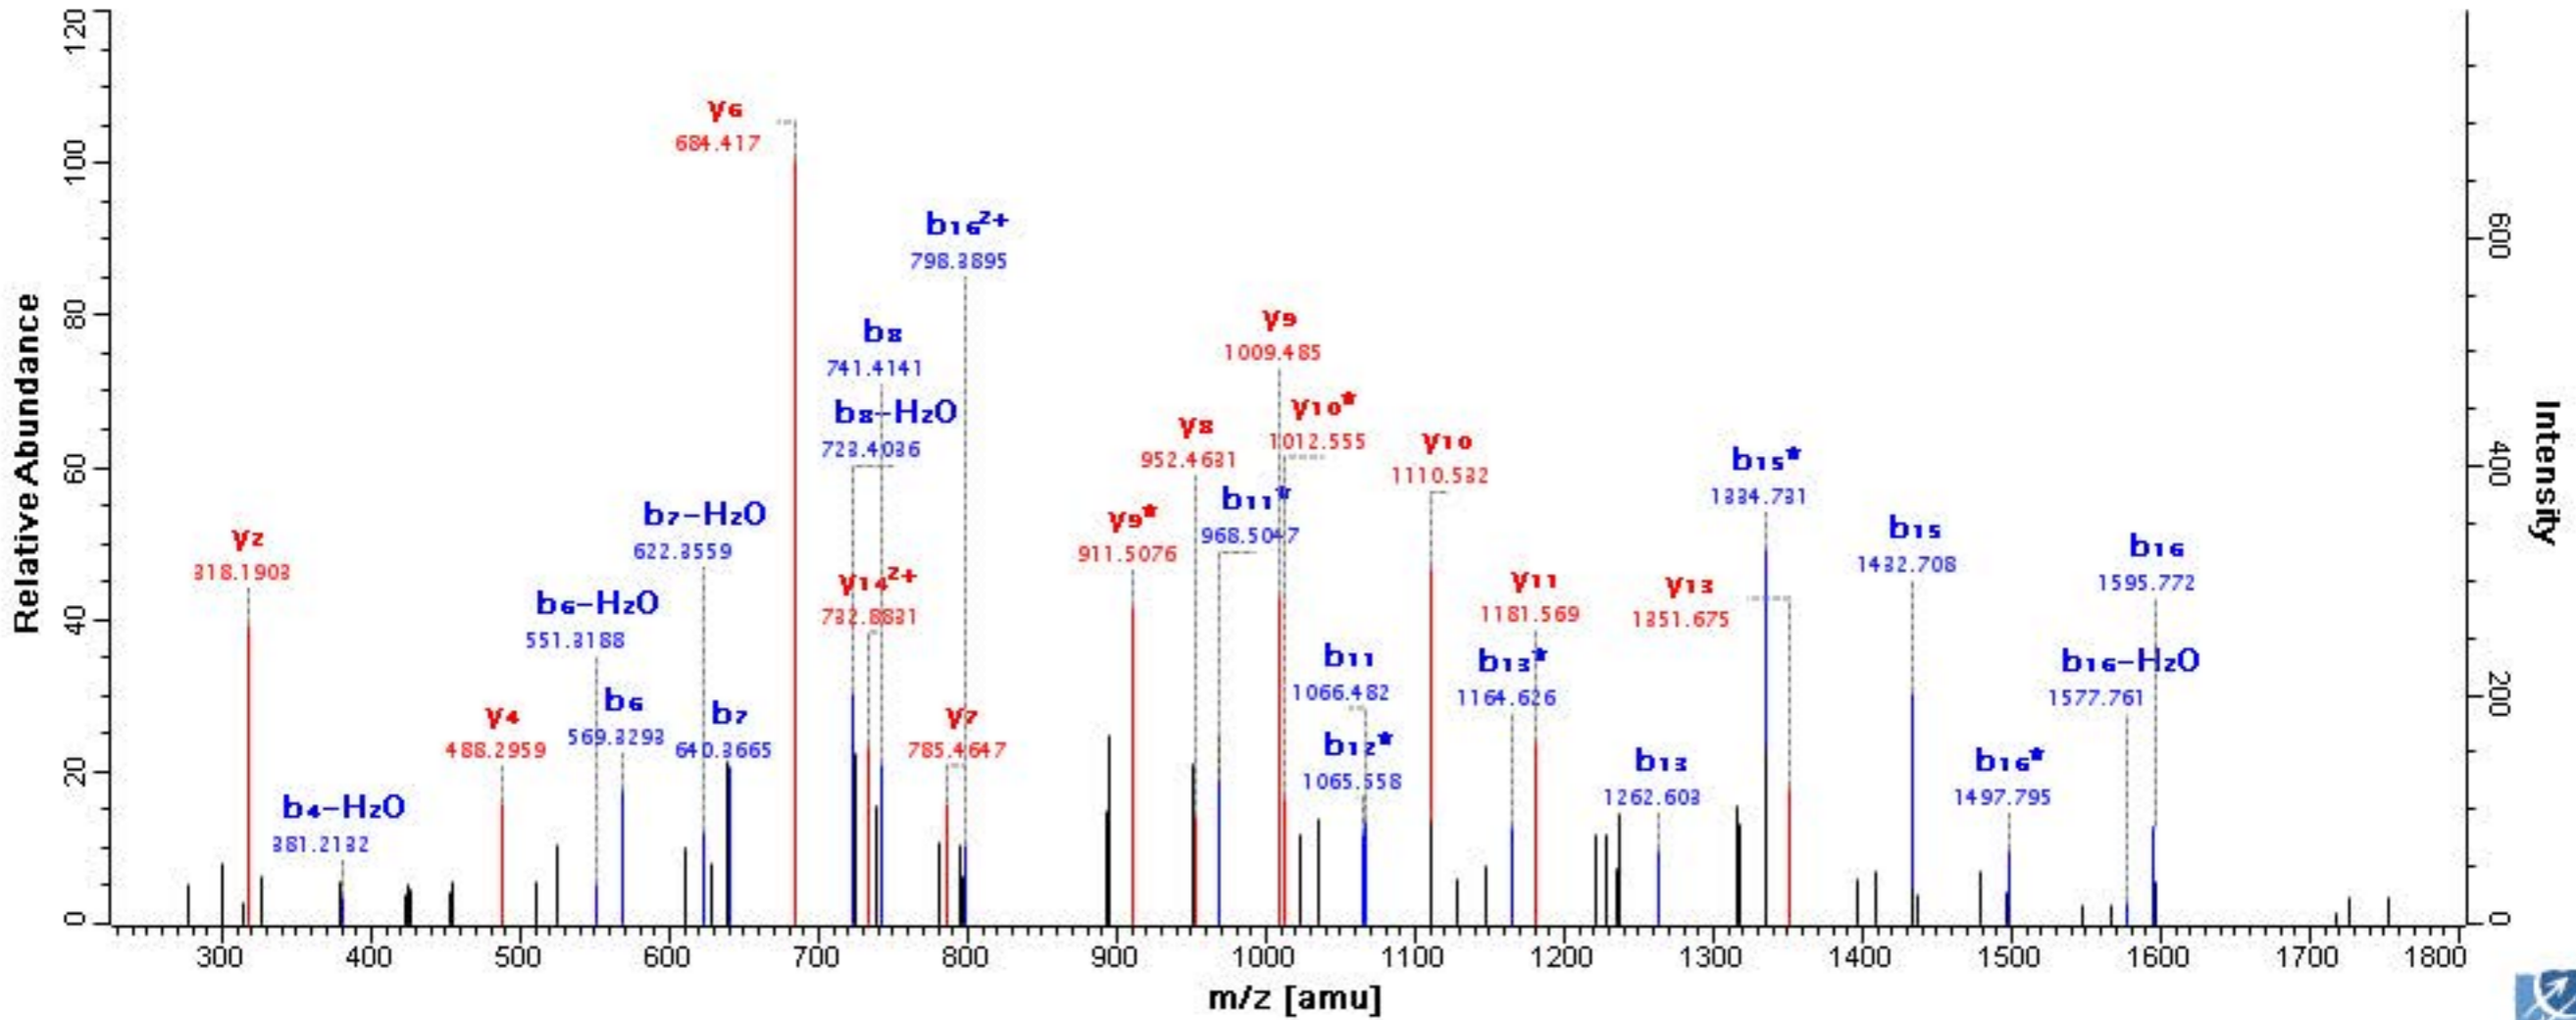

precursor information

|                   |                     |
|-------------------|---------------------|
| Mass:             | 1748.88404          |
| m/z:              | System.Collections. |
| Charge:           | System.Collections. |
| Retentiontime:    | System.Collections. |
| Score:            | 153.725             |
| Mass Error [ppm]: | -0.044937           |
| PEP:              | 2.8942E-19          |
| Precursor Type:   | ISO                 |

| b <sup>2+</sup> ion |          | b ion     |          | seq |   |    | y ion    |           | y <sup>2+</sup> ion |           |
|---------------------|----------|-----------|----------|-----|---|----|----------|-----------|---------------------|-----------|
| Δ dalton            | mass     | Δ dalton  | mass     |     |   |    | Δ dalton | mass      | Δ dalton            | mass      |
|                     | 116.0342 |           | 116.0342 | 1   | D | 16 |          |           |                     |           |
|                     | 187.0713 |           | 187.0713 | 2   | A | 15 | 1634.864 |           | 1634.864            |           |
|                     | 286.1397 |           | 286.1397 | 3   | V | 14 | 1563.827 |           | 1563.827            |           |
|                     | 399.2238 |           | 399.2238 | 4   | I | 13 | 1464.759 |           | 732.8831            | +0.362323 |
|                     | 456.2453 |           | 456.2453 | 5   | G | 12 | 1351.675 | +0.074288 | 1351.675            |           |
|                     | 569.3293 | +0.014777 | 569.3293 | 6   | I | 11 | 1294.653 |           | 1294.653            |           |
|                     | 640.3665 | +0.03876  | 640.3665 | 7   | A | 10 | 1181.569 | +0.003179 | 1181.569            |           |
|                     | 741.4141 | +0.116447 | 741.4141 | 8   | T | 9  | 1110.532 | -0.071645 | 1110.532            |           |
|                     | 798.4356 |           | 798.4356 | 9   | G | 8  | 1009.485 | -0.045024 | 1009.485            |           |
|                     | 965.434  |           | 965.434  | 10  | S | 7  | 952.4631 | +0.115539 | 952.4631            |           |
|                     | 1066.482 | +0.132259 | 1066.482 | 11  | T | 6  | 785.4647 | +0.003363 | 785.4647            |           |
|                     | 1163.534 |           | 1163.534 | 12  | P | 5  | 684.417  | +0.013078 | 684.417             |           |
|                     | 1262.603 | -0.002468 | 1262.603 | 13  | V | 4  | 587.3643 |           | 587.3643            |           |
|                     | 1319.624 |           | 1319.624 | 14  | G | 3  | 488.2959 | +0.114053 | 488.2959            |           |
|                     | 1432.708 | +0.022986 | 1432.708 | 15  | I | 2  | 431.2744 |           | 431.2744            |           |
| -0.038092           | 798.3895 | -0.087706 | 1595.772 | 16  | Y | 1  | 318.1903 | +0.058082 | 318.1903            |           |
|                     |          |           |          | 17  | K | 0  | 155.127  |           | 155.127             |           |

general information

|                       |           |
|-----------------------|-----------|
| Annotation:           | 13 of 17  |
| AminoAcids Coverag    | 76 %      |
| Intensity Coverage:   | 59 %      |
| Protein Localisation: | 29 ... 45 |

Source: 20120514\_VR\_Bsu\_TripleSILACrep1\_pL2ESLS\_F21  
 Scannumber: 11534  
 Protein: BSU22880; jofD; ypfD  
 Peptide Score: 112.34  
 Method: ITMS; CID; 3

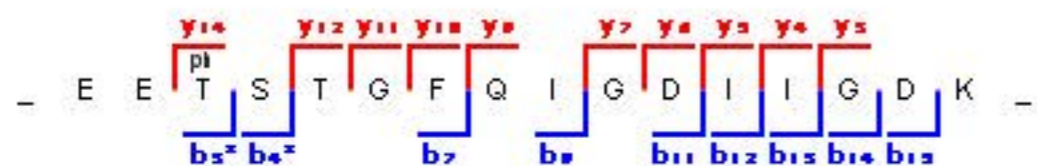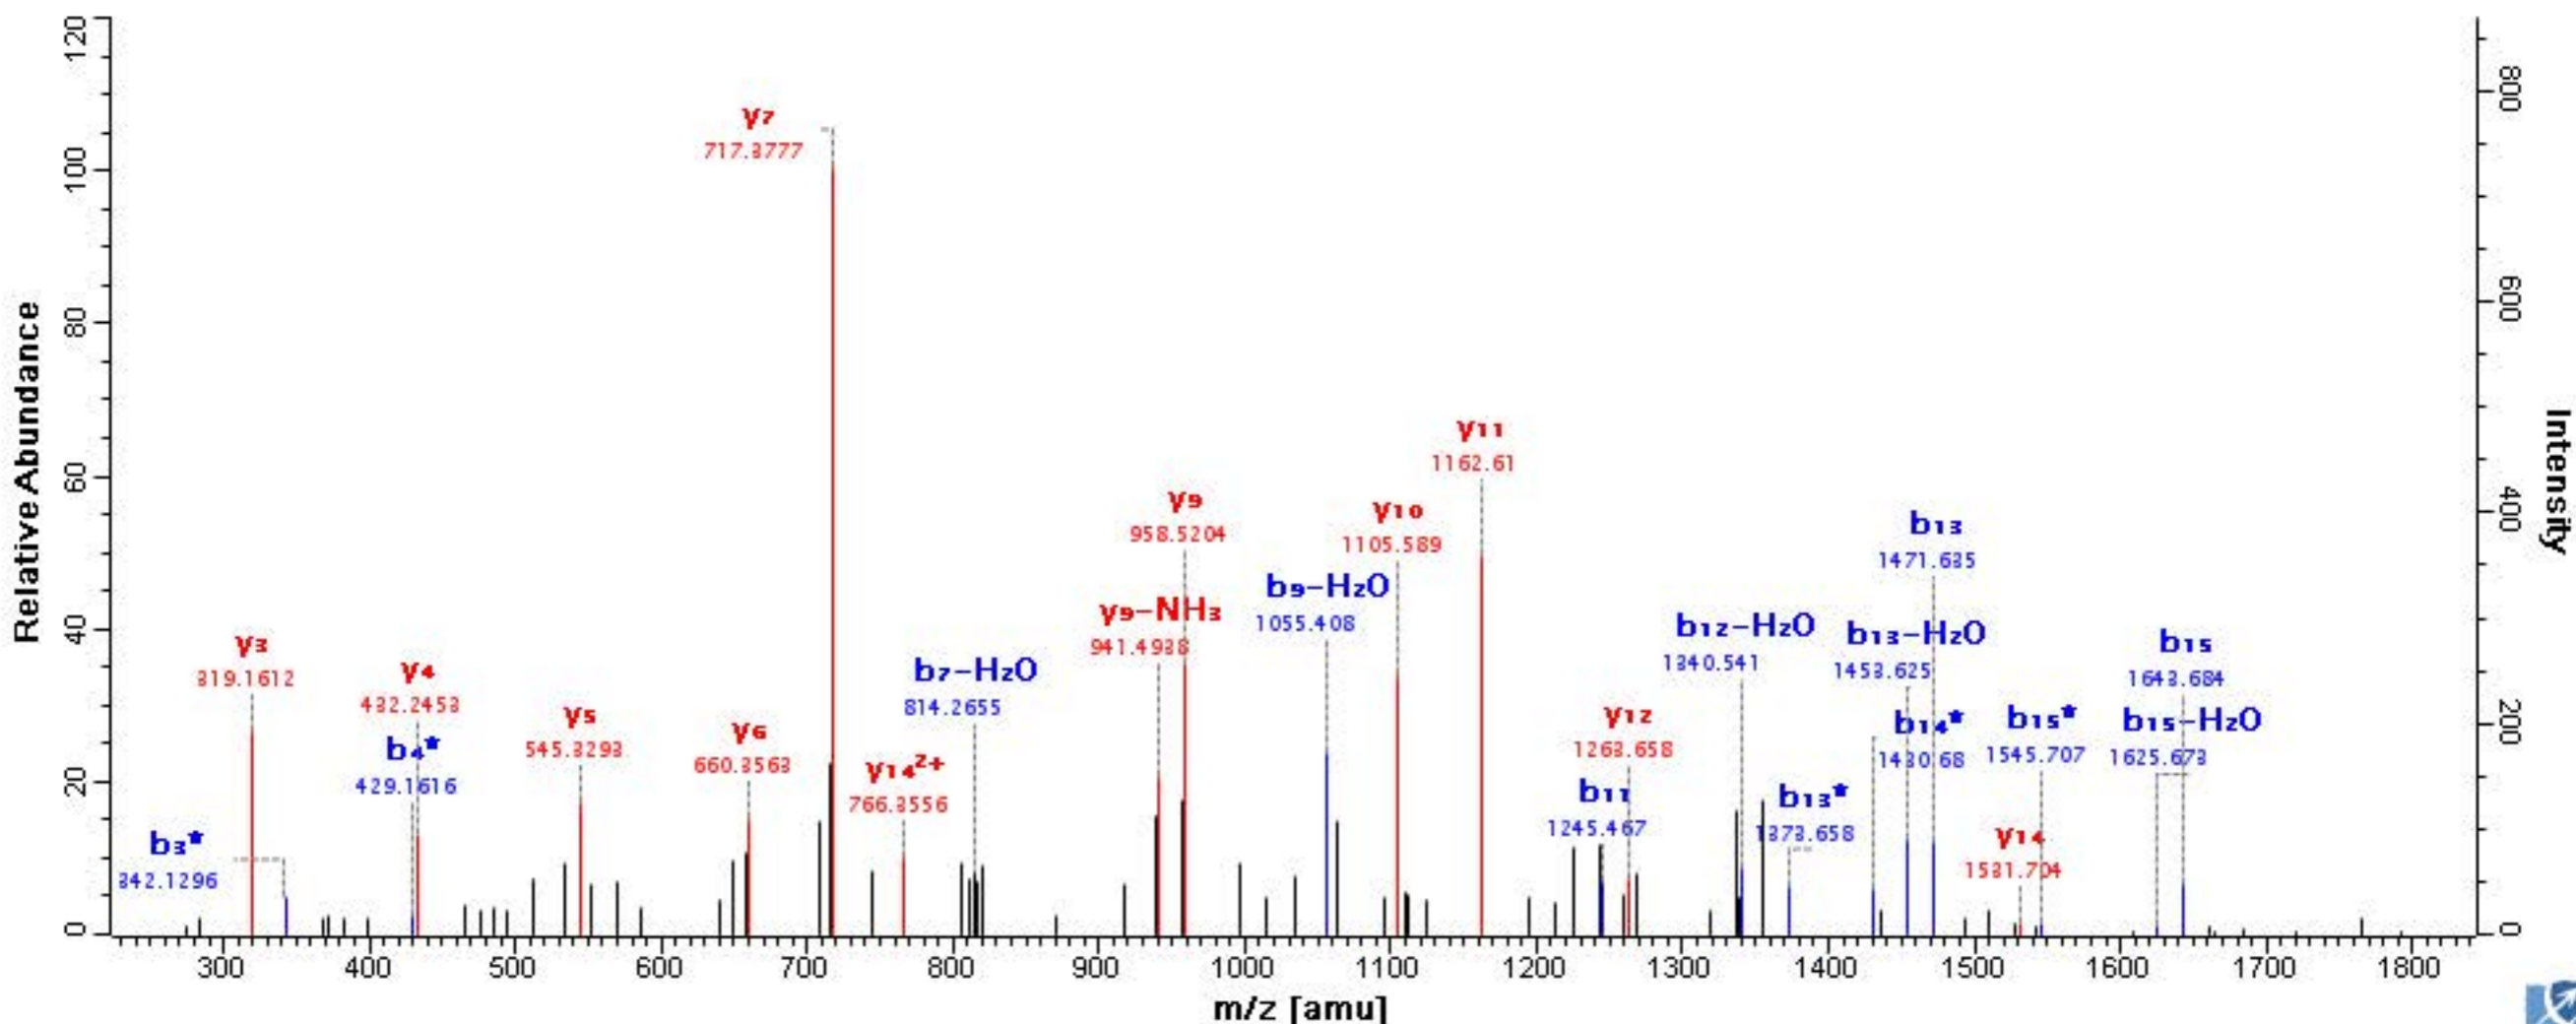

#### precursor information

|                   |                     |
|-------------------|---------------------|
| Mass:             | 1788.78053          |
| m/z:              | System.Collections. |
| Charge:           | System.Collections. |
| Retentiontime:    | System.Collections. |
| Score:            | 112.338             |
| Mass Error [ppm]: | -0.75925            |
| PEP:              | 7.4948E-05          |
| Precursor Type:   | MULTI               |

| b ion      |              |    |     |    | y ion        |            | y <sup>2+</sup> ion |            |
|------------|--------------|----|-----|----|--------------|------------|---------------------|------------|
| Δ dalton   | mass         |    | seq |    | Δ dalton     | mass       | Δ dalton            | mass       |
|            | 130.04986956 | 1  | E   | 15 |              |            |                     |            |
|            | 259.09246266 | 2  | E   | 14 | 1660.7465736 |            | 1660.7465736        |            |
|            | 440.10647154 | 3  | T   | 13 | 1531.7039805 | +0.0775136 | 766.3556285         | +0.1297231 |
|            | 527.13849995 | 4  | S   | 12 | 1350.6899717 |            | 1350.6899717        |            |
|            | 628.18617843 | 5  | T   | 11 | 1263.6579432 | +0.128922  | 1263.6579432        |            |
|            | 685.20764215 | 6  | G   | 10 | 1162.6102648 | +0.0198622 | 1162.6102648        |            |
|            | 832.27605607 | 7  | F   | 9  | 1105.5888011 | -0.0263011 | 1105.5888011        |            |
|            | 960.33463358 | 8  | Q   | 8  | 958.52038713 | -0.1124892 | 958.52038713        |            |
|            | 1073.4186976 | 9  | I   | 7  | 830.46180962 |            | 830.46180962        |            |
|            | 1130.4401613 | 10 | G   | 6  | 717.37774564 | +0.022645  | 717.37774564        |            |
| -0.0546287 | 1245.4671043 | 11 | D   | 5  | 660.35628192 | +0.0204271 | 660.35628192        |            |
|            | 1358.5511683 | 12 | I   | 4  | 545.32933889 | +0.1049262 | 545.32933889        |            |
| +0.0226046 | 1471.6352323 | 13 | I   | 3  | 432.24527491 | -0.02152   | 432.24527491        |            |
|            | 1528.656696  | 14 | G   | 2  | 319.16121093 | +0.0941296 | 319.16121093        |            |
| +0.1325231 | 1643.683639  | 15 | D   | 1  | 262.1397472  |            | 262.1397472         |            |
|            |              | 16 | K   | 0  | 147.11280417 |            | 147.11280417        |            |

#### general information

|                       |             |
|-----------------------|-------------|
| Annotation:           | 14 of 16    |
| AminoAcids Coverag    | 88 %        |
| Intensity Coverage:   | 53 %        |
| Protein Localisation: | 362 ... 377 |

Source: 20120514\_VR\_Bsu\_TripleSILACrep1\_pL2ESL5\_F21  
 Scannumber: 12693  
 Protein: BSU05740; phoAIII; phoB  
 Peptide Score: 81.73  
 Method: ITMS; CID; 3

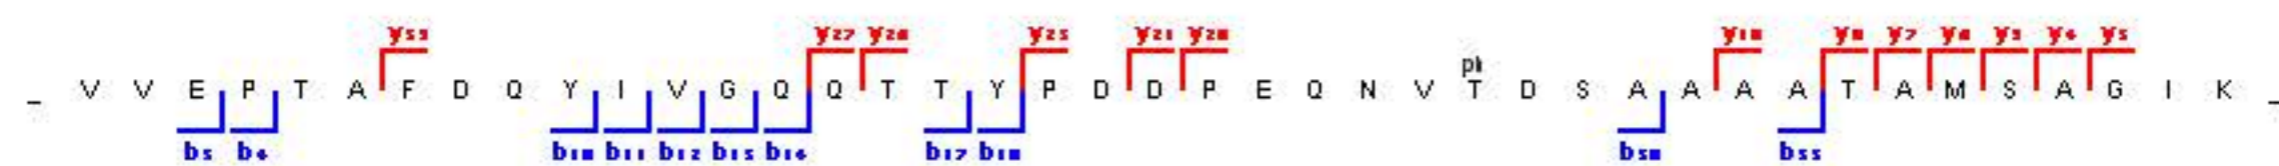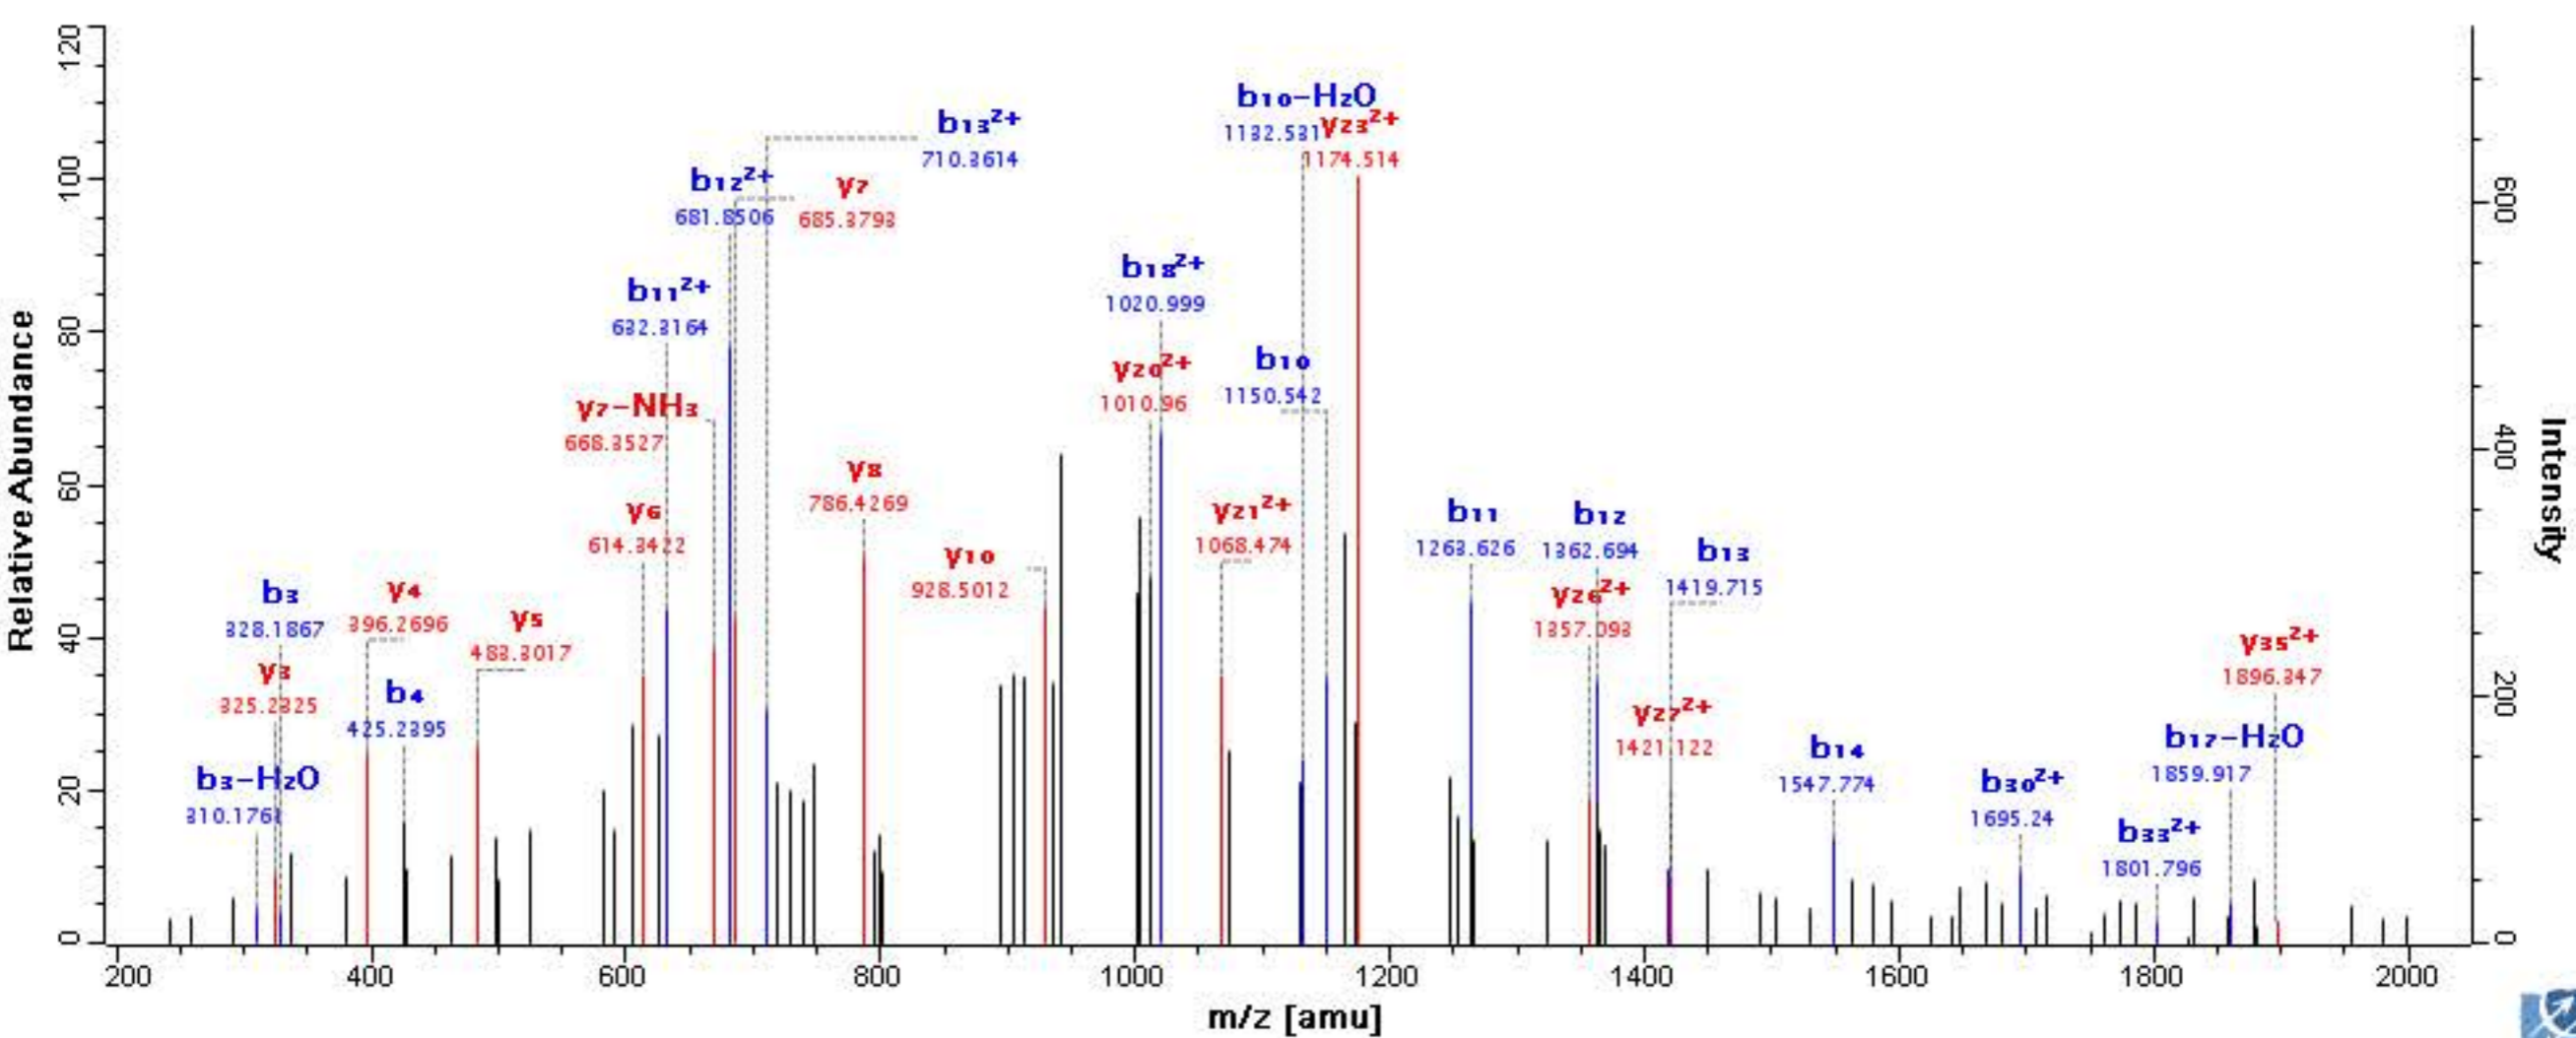

precursor information

|                   |                     |
|-------------------|---------------------|
| Mass:             | 4386.99592          |
| m/z:              | System.Collections. |
| Charge:           | System.Collections. |
| Retentiontime:    | System.Collections. |
| Score:            | 81.73186            |
| Mass Error [ppm]: | -0.25861            |
| PEP:              | 2.2497E-22          |
| Precursor Type:   | ISO                 |

| b <sup>2+</sup> ion |          | b ion     |          | seq |   |    | γ ion    |           | γ <sup>2+</sup> ion |           |
|---------------------|----------|-----------|----------|-----|---|----|----------|-----------|---------------------|-----------|
| Δ dalton            | mass     | Δ dalton  | mass     |     |   |    | Δ dalton | mass      | Δ dalton            | mass      |
|                     | 100.0757 |           | 100.0757 | 1   | V | 40 |          |           |                     |           |
|                     | 199.1441 |           | 199.1441 | 2   | V | 39 | 4288.936 |           | 4288.936            |           |
|                     | 328.1867 | -0.008231 | 328.1867 | 3   | E | 38 | 4189.868 |           | 4189.868            |           |
|                     | 425.2395 | +0.010722 | 425.2395 | 4   | P | 37 | 4060.825 |           | 4060.825            |           |
|                     | 526.2871 |           | 526.2871 | 5   | T | 36 | 3963.772 |           | 3963.772            |           |
|                     | 597.3243 |           | 597.3243 | 6   | A | 35 | 3862.724 |           | 3862.724            |           |
|                     | 744.3927 |           | 744.3927 | 7   | F | 34 | 3791.687 |           | 1896.347            | +0.207127 |
|                     | 859.4196 |           | 859.4196 | 8   | D | 33 | 3644.619 |           | 3644.619            |           |
|                     | 987.4782 |           | 987.4782 | 9   | Q | 32 | 3529.592 |           | 3529.592            |           |
|                     | 1150.542 | +0.034411 | 1150.542 | 10  | Y | 31 | 3401.533 |           | 3401.533            |           |
| +0.276101           | 632.3164 | +0.098541 | 1263.626 | 11  | I | 30 | 3238.47  |           | 3238.47             |           |
| +0.167492           | 681.8506 | +0.043676 | 1362.694 | 12  | V | 29 | 3125.386 |           | 3125.386            |           |
| +0.286948           | 710.3614 | -0.306645 | 1419.715 | 13  | G | 28 | 3026.318 |           | 3026.318            |           |
|                     | 1547.774 | +0.409924 | 1547.774 | 14  | Q | 27 | 2969.296 |           | 2969.296            |           |
|                     | 1675.833 |           | 1675.833 | 15  | Q | 26 | 2841.238 |           | 1421.122            | +0.398571 |
|                     | 1776.88  |           | 1776.88  | 16  | T | 25 | 2713.179 |           | 1357.093            | -0.479489 |
|                     | 1877.928 |           | 1877.928 | 17  | T | 24 | 2612.131 |           | 2612.131            |           |
| -0.02535            | 1020.999 |           | 2040.991 | 18  | Y | 23 | 2511.084 |           | 2511.084            |           |
|                     | 2138.044 |           | 2138.044 | 19  | P | 22 | 2348.02  |           | 1174.514            | +0.139038 |
|                     | 2253.071 |           | 2253.071 | 20  | D | 21 | 2250.968 |           | 2250.968            |           |
|                     | 2368.098 |           | 2368.098 | 21  | D | 20 | 2135.941 |           | 1068.474            | -0.20563  |
|                     | 2465.151 |           | 2465.151 | 22  | P | 19 | 2020.914 |           | 1010.96             | +0.403118 |
|                     | 2594.193 |           | 2594.193 | 23  | E | 18 | 1923.861 |           | 1923.861            |           |
|                     | 2722.252 |           | 2722.252 | 24  | Q | 17 | 1794.818 |           | 1794.818            |           |
|                     | 2836.295 |           | 2836.295 | 25  | N | 16 | 1666.76  |           | 1666.76             |           |
|                     | 2935.363 |           | 2935.363 | 26  | V | 15 | 1552.717 |           | 1552.717            |           |
|                     | 3116.377 |           | 3116.377 | 27  | T | 14 | 1453.648 |           | 1453.648            |           |
|                     | 3231.404 |           | 3231.404 | 28  | D | 13 | 1272.634 |           | 1272.634            |           |
|                     | 3318.436 |           | 3318.436 | 29  | S | 12 | 1157.607 |           | 1157.607            |           |
| +0.260557           | 1695.24  |           | 3389.473 | 30  | A | 11 | 1070.575 |           | 1070.575            |           |
|                     | 3460.51  |           | 3460.51  | 31  | A | 10 | 999.5383 |           | 999.5383            |           |
|                     | 3531.548 |           | 3531.548 | 32  | A | 9  | 928.5012 | +0.084089 | 928.5012            |           |
| +0.063529           | 1801.796 |           | 3602.585 | 33  | A | 8  | 857.4641 |           | 857.4641            |           |
|                     | 3703.632 |           | 3703.632 | 34  | T | 7  | 786.4269 | -0.039193 | 786.4269            |           |
|                     | 3774.669 |           | 3774.669 | 35  | A | 6  | 685.3793 | -0.008422 | 685.3793            |           |
|                     | 3905.71  |           | 3905.71  | 36  | M | 5  | 614.3422 | +0.128912 | 614.3422            |           |
|                     | 3992.742 |           | 3992.742 | 37  | S | 4  | 483.3017 | +0.150903 | 483.3017            |           |
|                     | 4063.779 |           | 4063.779 | 38  | A | 3  | 396.2696 | +0.061227 | 396.2696            |           |
|                     | 4120.801 |           | 4120.801 | 39  | G | 2  | 325.2325 | +0.057081 | 325.2325            |           |
|                     | 4233.885 |           | 4233.885 | 40  | I | 1  | 268.2111 |           | 268.2111            |           |
|                     |          |           |          | 41  | K | 0  | 155.127  |           | 155.127             |           |

general information

|                       |            |
|-----------------------|------------|
| Annotation:           | 24 of 41   |
| AminoAcids Coverage:  | 59 %       |
| Intensity Coverage:   | 45 %       |
| Protein Localisation: | 73 ... 113 |

Source: 20120514\_VR\_Bsu\_TripleSILACrep1\_pL2ESLS\_F21  
 Scannumber: 13813  
 Protein: ahpF; BSU40100; ndh  
 Peptide Score: 228.19  
 Method: ITMS; CID; 3

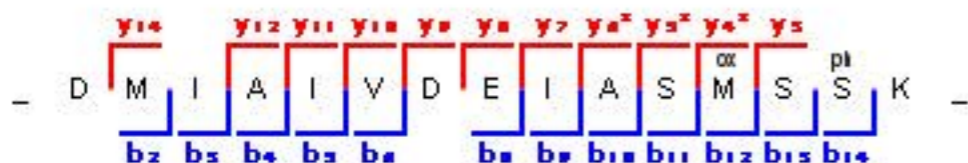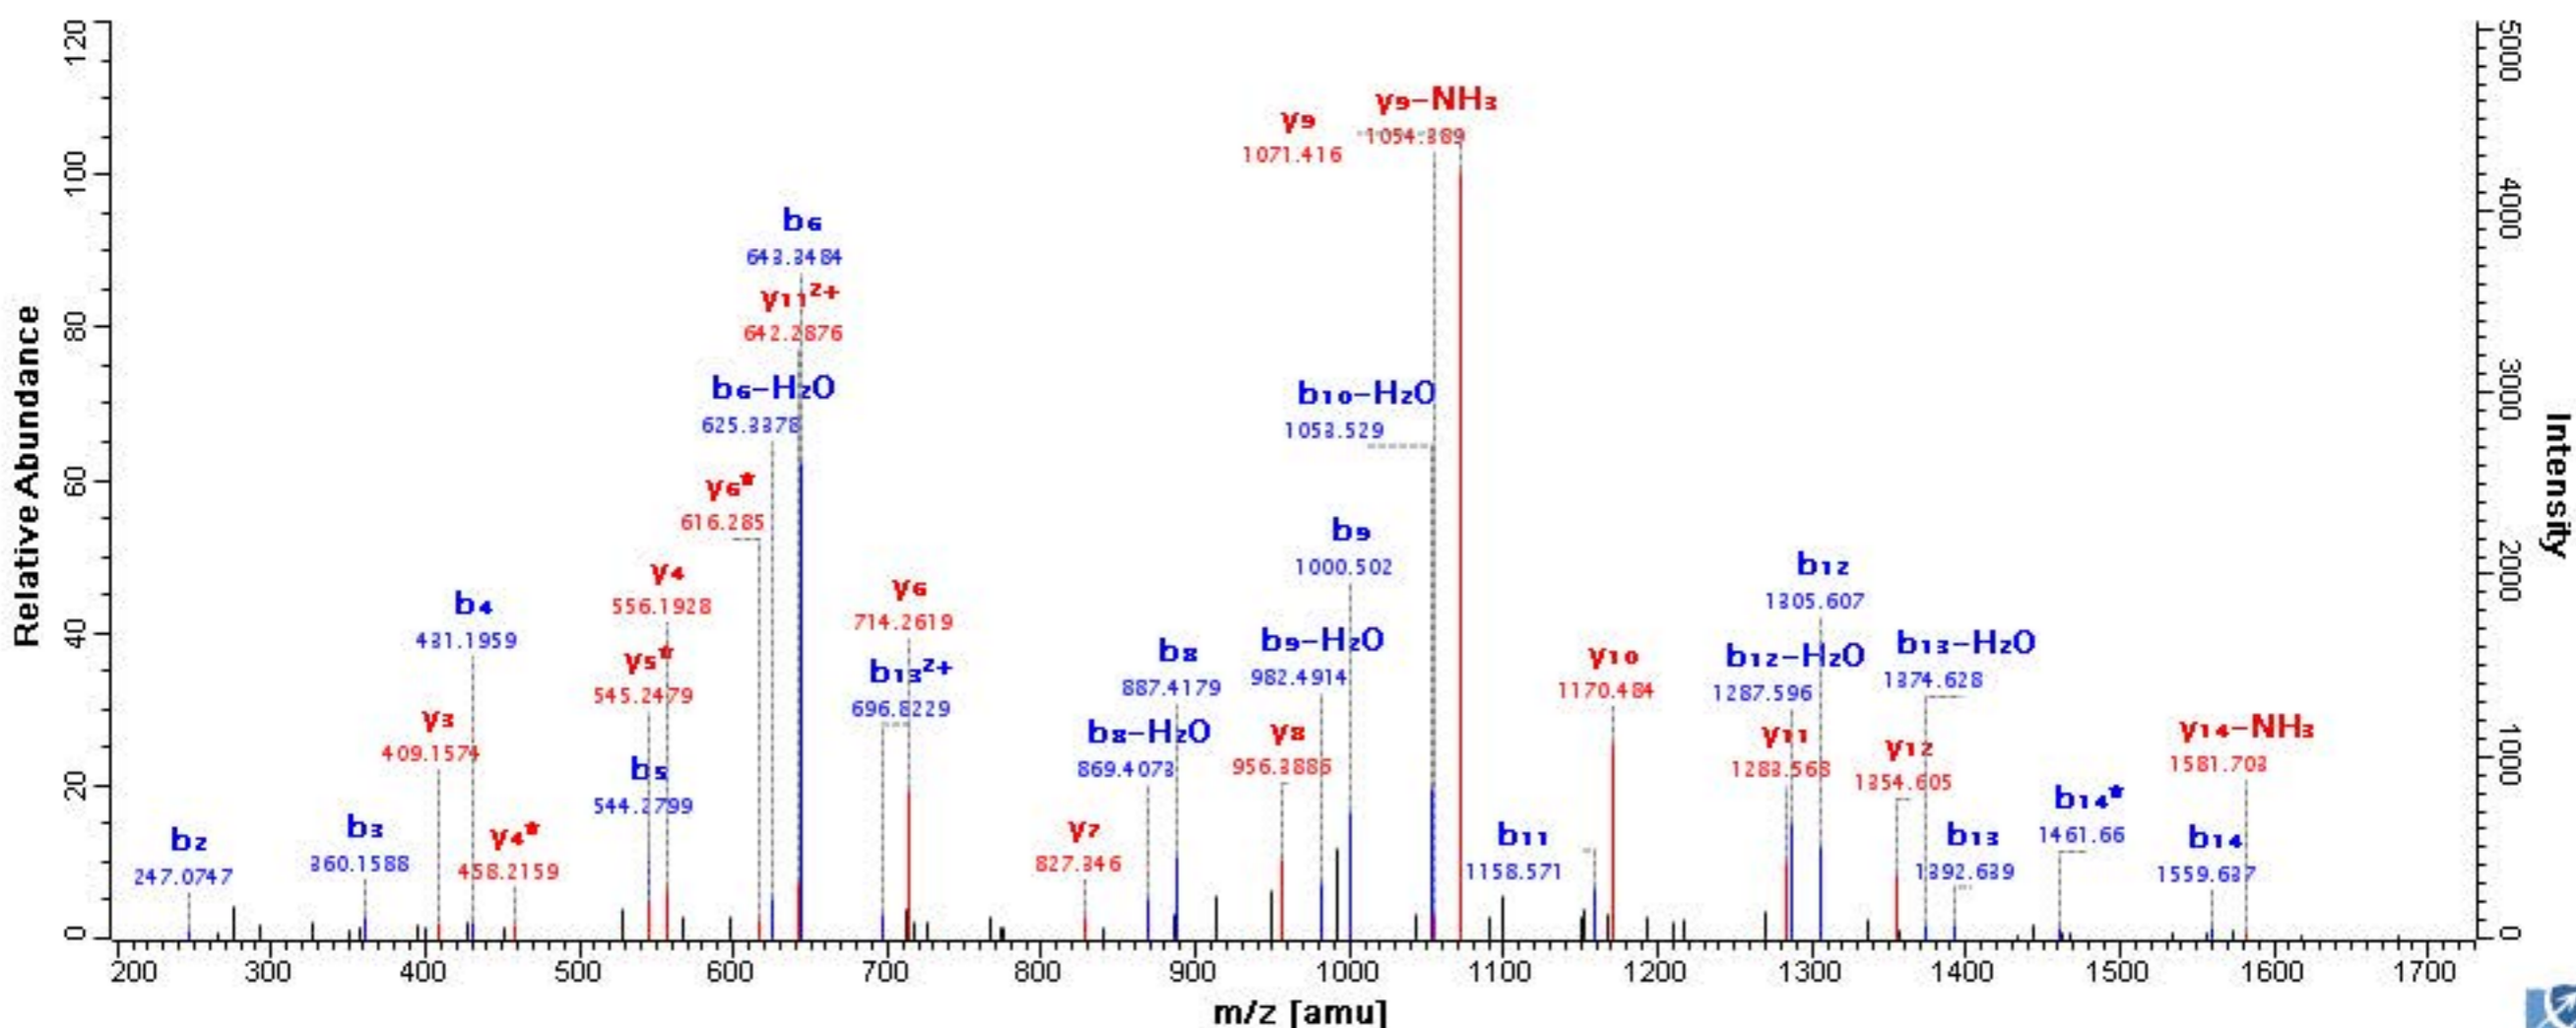

#### precursor information

|                   |                     |
|-------------------|---------------------|
| Mass:             | 1704.73524          |
| m/z:              | System.Collections. |
| Charge:           | System.Collections. |
| Retentiontime:    | System.Collections. |
| Score:            | 228.1851            |
| Mass Error [ppm]: | 0.060042            |
| PEP:              | 1.4988E-73          |
| Precursor Type:   | MULTI               |

#### general information

|                       |           |
|-----------------------|-----------|
| Annotation:           | 13 of 15  |
| AminoAcids Coverag    | 87 %      |
| Intensity Coverage:   | 76 %      |
| Protein Localisation: | 36 ... 50 |

| b <sup>2+</sup> ion |          | b ion     |          | seq |   |    | gamma ion |           | gamma <sup>2+</sup> ion |           |
|---------------------|----------|-----------|----------|-----|---|----|-----------|-----------|-------------------------|-----------|
| Δ dalton            | mass     | Δ dalton  | mass     |     |   |    | Δ dalton  | mass      | Δ dalton                | mass      |
|                     | 116.0342 |           | 116.0342 | 1   | D | 14 |           |           |                         |           |
|                     | 247.0747 | +0.128604 | 247.0747 | 2   | M | 13 | 1598.73   |           | 1598.73                 |           |
|                     | 360.1588 | -0.024979 | 360.1588 | 3   | I | 12 | 1467.689  |           | 1467.689                |           |
|                     | 431.1959 | -0.052693 | 431.1959 | 4   | A | 11 | 1354.605  | +0.007059 | 1354.605                |           |
|                     | 544.2799 | +0.045433 | 544.2799 | 5   | I | 10 | 1283.568  | +0.173568 | 642.2876                | +0.271134 |
|                     | 643.3484 | -0.023592 | 643.3484 | 6   | V | 9  | 1170.484  | -0.064512 | 1170.484                |           |
|                     | 758.3753 |           | 758.3753 | 7   | D | 8  | 1071.416  | -0.051274 | 1071.416                |           |
|                     | 887.4179 | -0.086414 | 887.4179 | 8   | E | 7  | 956.3886  | +0.205344 | 956.3886                |           |
|                     | 1000.502 | +0.161431 | 1000.502 | 9   | I | 6  | 827.346   | +0.203565 | 827.346                 |           |
|                     | 1071.539 |           | 1071.539 | 10  | A | 5  | 714.2619  | +0.047028 | 714.2619                |           |
|                     | 1158.571 | -0.064266 | 1158.571 | 11  | S | 4  | 643.2248  |           | 643.2248                |           |
|                     | 1305.607 | +0.00385  | 1305.607 | 12  | M | 3  | 556.1928  | +0.043356 | 556.1928                |           |
| -0.221219           | 696.8229 | +0.168721 | 1392.639 | 13  | S | 2  | 409.1574  | +0.120869 | 409.1574                |           |
|                     | 1559.637 | +0.018629 | 1559.637 | 14  | S | 1  | 322.1254  |           | 322.1254                |           |
|                     |          |           |          | 15  | K | 0  | 155.127   |           | 155.127                 |           |

Source: 20120514\_VR\_Bsu\_TripleSILACrep1\_pL2ESLS\_F21  
 Scannumber: 13929  
 Protein: BSU04680; rsbS; ycx5  
 Peptide Score: 149.07  
 Method: ITMS; CID; 3

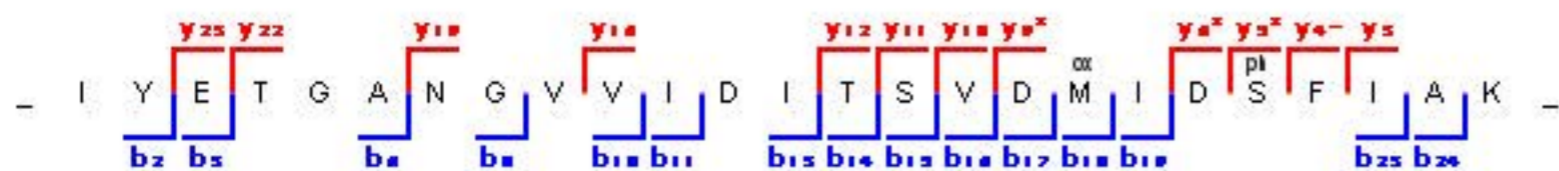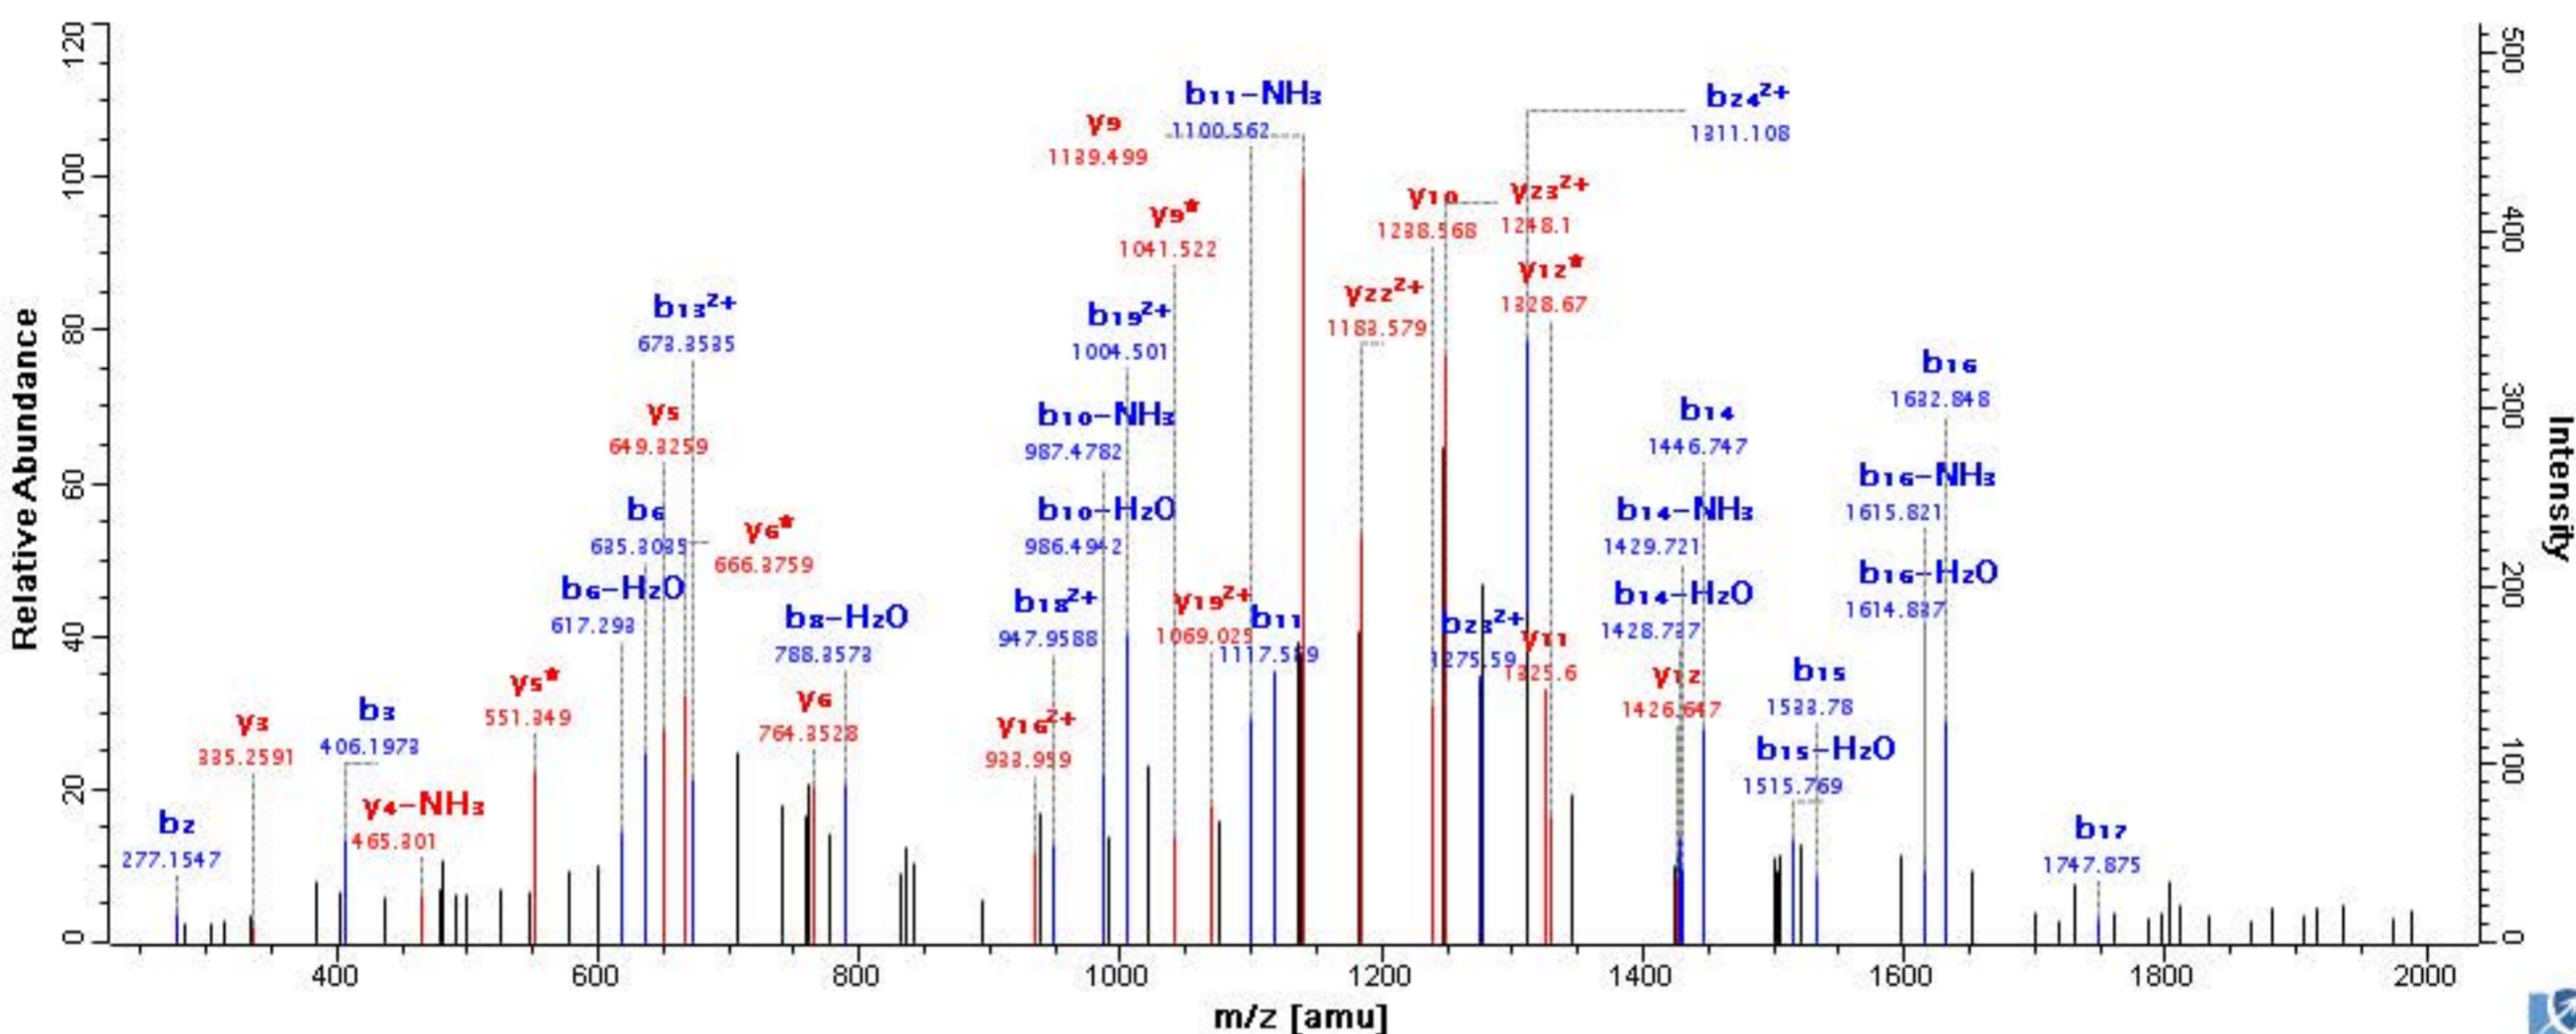

#### precursor information

|                   |                     |
|-------------------|---------------------|
| Mass:             | 2766.30844          |
| m/z:              | System.Collections. |
| Charge:           | System.Collections. |
| Retentiontime:    | System.Collections. |
| Score:            | 149.0744            |
| Mass Error [ppm]: | 0.34677             |
| PEP:              | 1.6655E-26          |
| Precursor Type:   | MULTI               |

#### general information

|                       |           |
|-----------------------|-----------|
| Annotation:           | 20 of 25  |
| AminoAcids Coverage:  | 80 %      |
| Intensity Coverage:   | 56 %      |
| Protein Localisation: | 39 ... 63 |

| b <sup>2+</sup> ion |          | b ion     |          |     | γ ion |          | γ <sup>2+</sup> ion |           |                    |
|---------------------|----------|-----------|----------|-----|-------|----------|---------------------|-----------|--------------------|
| Δ dalton            | mass     | Δ dalton  | mass     | seq |       | Δ dalton | mass                | Δ dalton  | mass               |
|                     | 114.0913 |           | 114.0913 | 1   | I     | 24       |                     |           |                    |
|                     | 277.1547 | -0.181341 | 277.1547 | 2   | Y     | 23       | 2658.256            |           | 2658.256           |
|                     | 406.1973 | -0.035092 | 406.1973 | 3   | E     | 22       | 2495.192            |           | 1248.1 +0.180644   |
|                     | 507.2449 |           | 507.2449 | 4   | T     | 21       | 2366.15             |           | 1183.579 +0.097692 |
|                     | 564.2664 |           | 564.2664 | 5   | G     | 20       | 2265.102            |           | 2265.102           |
|                     | 635.3035 | +0.185801 | 635.3035 | 6   | A     | 19       | 2208.081            |           | 2208.081           |
|                     | 749.3464 |           | 749.3464 | 7   | N     | 18       | 2137.044            |           | 1069.025 -0.106504 |
|                     | 806.3679 |           | 806.3679 | 8   | G     | 17       | 2023.001            |           | 2023.001           |
|                     | 905.4363 |           | 905.4363 | 9   | V     | 16       | 1965.979            |           | 1965.979           |
|                     | 1004.505 |           | 1004.505 | 10  | V     | 15       | 1866.911            |           | 933.959 +0.252929  |
|                     | 1117.589 | -0.001155 | 1117.589 | 11  | I     | 14       | 1767.842            |           | 1767.842           |
|                     | 1232.616 |           | 1232.616 | 12  | D     | 13       | 1654.758            |           | 1654.758           |
| -0.005459           | 673.3535 |           | 1345.7   | 13  | I     | 12       | 1539.731            |           | 1539.731           |
|                     | 1446.747 | +0.115673 | 1446.747 | 14  | T     | 11       | 1426.647            | +0.10987  | 1426.647           |
|                     | 1533.78  | +0.07632  | 1533.78  | 15  | S     | 10       | 1325.6              | +0.05269  | 1325.6             |
|                     | 1632.848 | -0.065336 | 1632.848 | 16  | V     | 9        | 1238.568            | +0.36133  | 1238.568           |
|                     | 1747.875 | +0.257086 | 1747.875 | 17  | D     | 8        | 1139.499            | +0.017146 | 1139.499           |
| -0.024997           | 947.9588 |           | 1894.91  | 18  | M     | 7        | 1024.472            |           | 1024.472           |
| -0.110852           | 1004.501 |           | 2007.994 | 19  | I     | 6        | 877.4369            |           | 877.4369           |
|                     | 2123.021 |           | 2123.021 | 20  | D     | 5        | 764.3528            | +0.060342 | 764.3528           |
|                     | 2290.02  |           | 2290.02  | 21  | S     | 4        | 649.3259            | +0.030034 | 649.3259           |
|                     | 2437.088 |           | 2437.088 | 22  | F     | 3        | 482.3275            |           | 482.3275           |
| +0.323756           | 1275.59  |           | 2550.172 | 23  | I     | 2        | 335.2591            | +0.352361 | 335.2591           |
| +0.288842           | 1311.108 |           | 2621.209 | 24  | A     | 1        | 222.175             |           | 222.175            |
|                     |          |           |          | 25  | K     | 0        | 151.1379            |           | 151.1379           |



Source: 20120514\_VR\_Bsu\_TripleSILACrep1\_pL2ESLS\_F21  
 Scannumber: 13985  
 Protein: BSU23070; serA  
 Peptide Score: 147.56  
 Method: ITMS; CID; 3

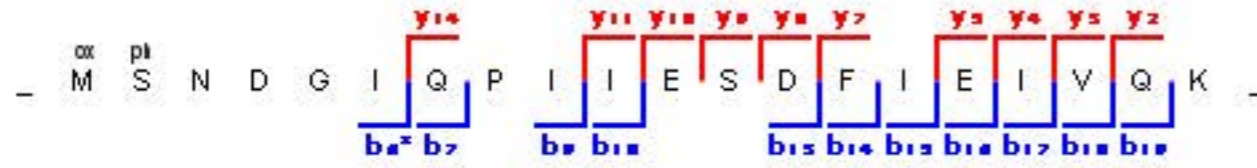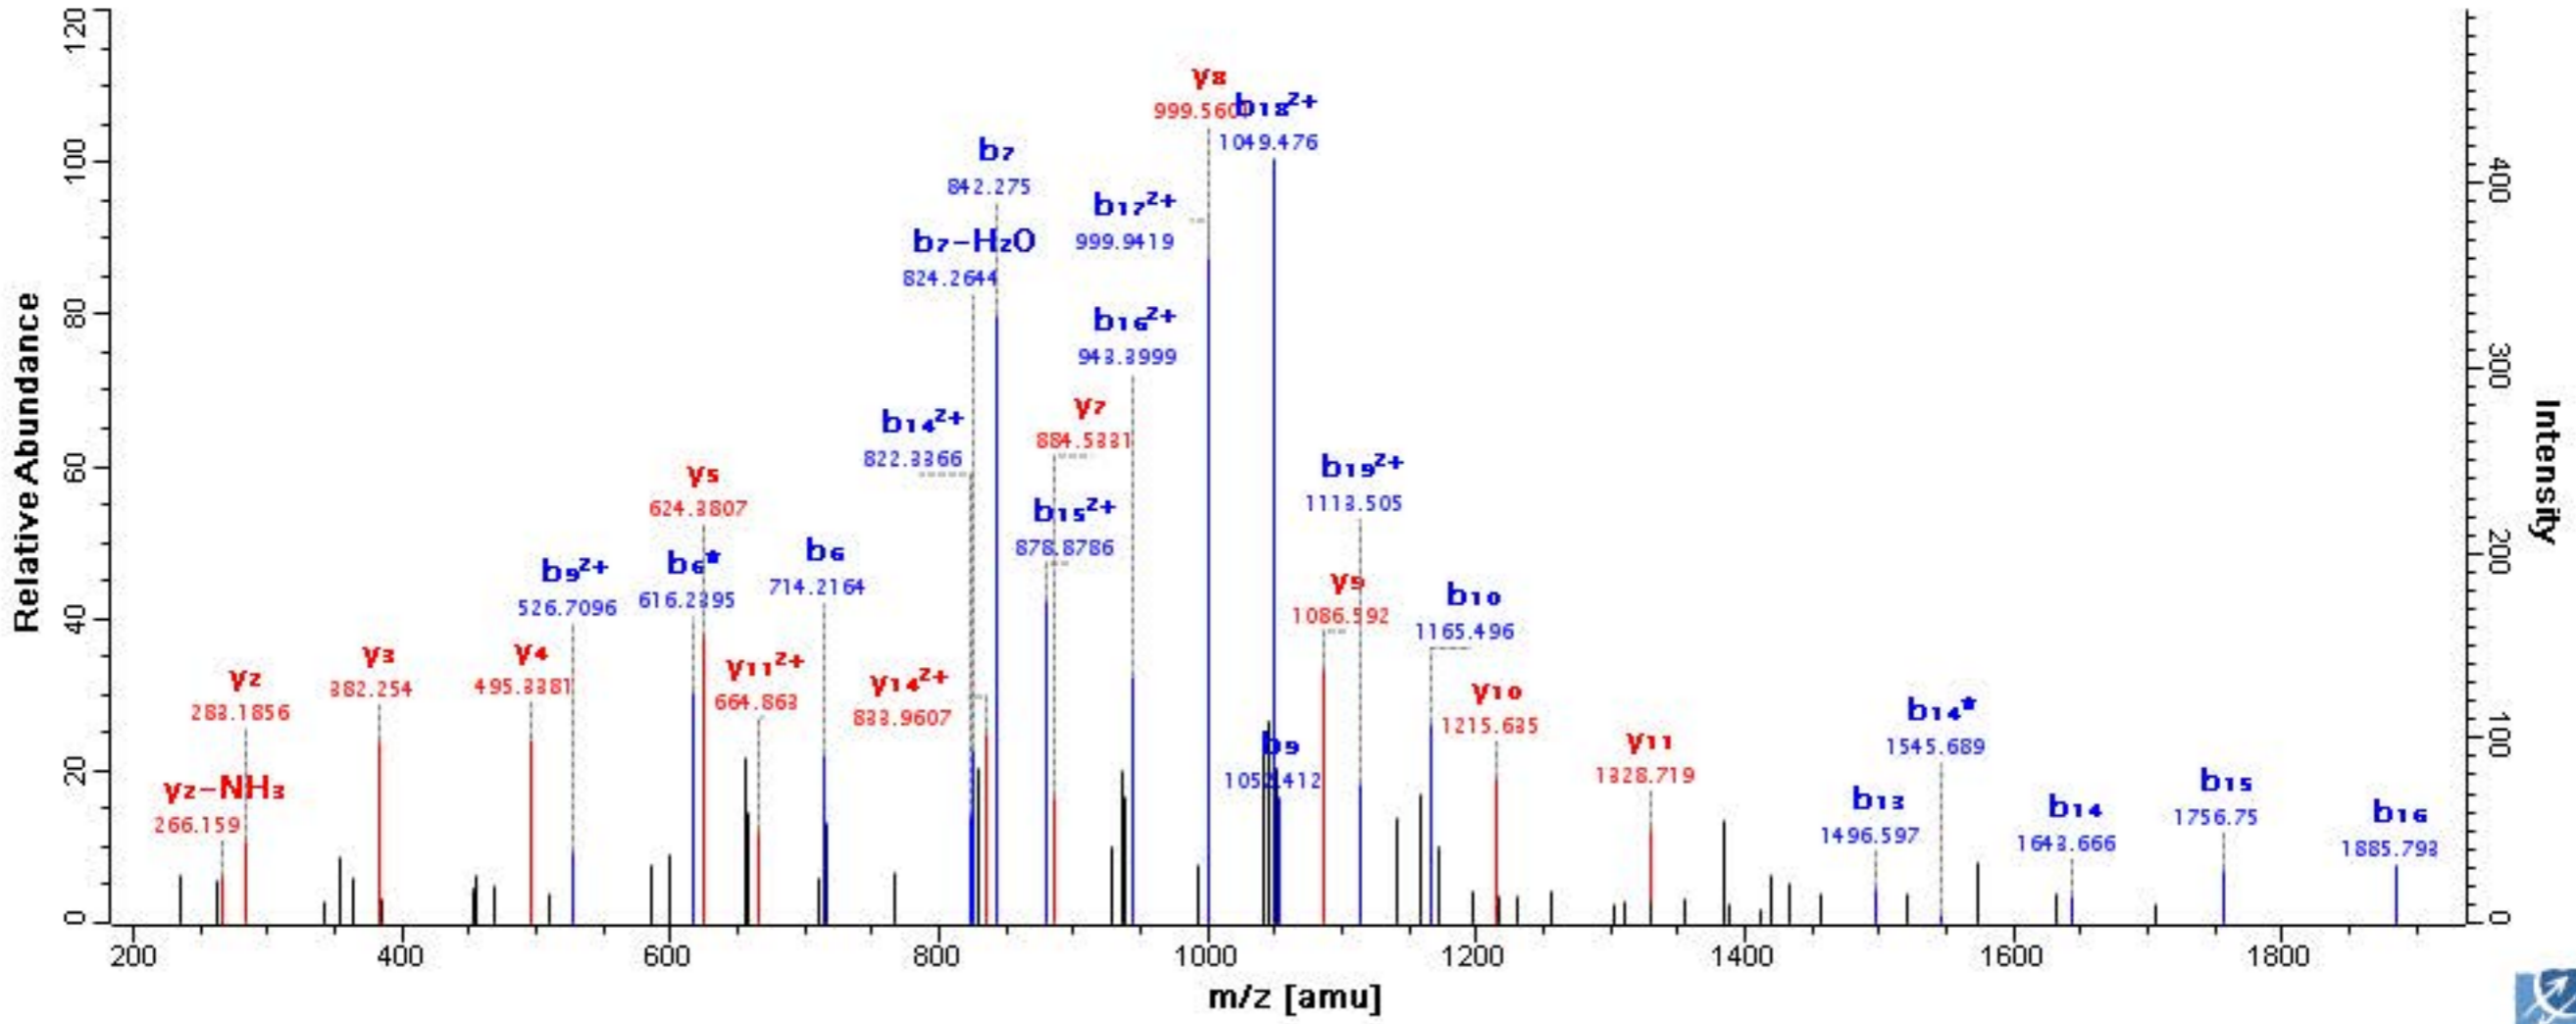

#### precursor information

|                   |                     |
|-------------------|---------------------|
| Mass:             | 2371.102            |
| m/z:              | System.Collections. |
| Charge:           | System.Collections. |
| Retentiontime:    | System.Collections. |
| Score:            | 147.5625            |
| Mass Error [ppm]: | 0.06621             |
| PEP:              | 3.1013E-19          |
| Precursor Type:   | MULTI               |

#### general information

|                       |           |
|-----------------------|-----------|
| Annotation:           | 14 of 20  |
| AminoAcids Coverage:  | 70 %      |
| Intensity Coverage:   | 64 %      |
| Protein Localisation: | 10 ... 29 |

| b <sup>2+</sup> ion |          | b ion     |          | seq |   |    | γ ion    |           | γ <sup>2+</sup> ion |           |
|---------------------|----------|-----------|----------|-----|---|----|----------|-----------|---------------------|-----------|
| Δ dalton            | mass     | Δ dalton  | mass     |     |   |    | Δ dalton | mass      | Δ dalton            | mass      |
|                     | 148.0427 |           | 148.0427 | 1   | M | 19 |          |           |                     |           |
|                     | 315.041  |           | 315.041  | 2   | S | 18 | 2233.088 |           | 2233.088            |           |
|                     | 429.084  |           | 429.084  | 3   | N | 17 | 2066.09  |           | 2066.09             |           |
|                     | 544.1109 |           | 544.1109 | 4   | D | 16 | 1952.047 |           | 1952.047            |           |
|                     | 601.1324 |           | 601.1324 | 5   | G | 15 | 1837.02  |           | 1837.02             |           |
|                     | 714.2164 | +0.009947 | 714.2164 | 6   | I | 14 | 1779.998 |           | 1779.998            |           |
|                     | 842.275  | +0.131118 | 842.275  | 7   | Q | 13 | 1666.914 |           | 833.9607            | -0.017971 |
|                     | 939.3278 |           | 939.3278 | 8   | P | 12 | 1538.856 |           | 1538.856            |           |
| +0.02024            | 526.7096 | +0.019681 | 1052.412 | 9   | I | 11 | 1441.803 |           | 1441.803            |           |
|                     | 1165.496 | +0.054025 | 1165.496 | 10  | I | 10 | 1328.719 | -0.037606 | 664.863             | -0.286601 |
|                     | 1294.538 |           | 1294.538 | 11  | E | 9  | 1215.635 | -0.048268 | 1215.635            |           |
|                     | 1381.571 |           | 1381.571 | 12  | S | 8  | 1086.592 | -0.044738 | 1086.592            |           |
|                     | 1496.597 | -0.061578 | 1496.597 | 13  | D | 7  | 999.5601 | -0.050612 | 999.5601            |           |
| +0.141022           | 822.3366 | +0.032606 | 1643.666 | 14  | F | 6  | 884.5331 | +0.307142 | 884.5331            |           |
| +0.207754           | 878.8786 | +0.173151 | 1756.75  | 15  | I | 5  | 737.4647 |           | 737.4647            |           |
| +0.111812           | 943.3999 | -0.275204 | 1885.793 | 16  | E | 4  | 624.3807 | +0.139368 | 624.3807            |           |
| +0.246843           | 999.9419 |           | 1998.877 | 17  | I | 3  | 495.3381 | +0.110367 | 495.3381            |           |
| +0.10735            | 1049.476 |           | 2097.945 | 18  | V | 2  | 382.254  | +0.086093 | 382.254             |           |
| -0.027041           | 1113.505 |           | 2226.004 | 19  | Q | 1  | 283.1856 | +0.182889 | 283.1856            |           |
|                     |          |           |          | 20  | K | 0  | 155.127  |           | 155.127             |           |

Source: 20120514\_VR\_Bsu\_TripleSILACrep1\_pL2ESLS\_F21  
 Scannumber: 5109  
 Protein: BSU01320; rplR  
 Peptide Score: 159.69  
 Method: ITMS; CID; 3

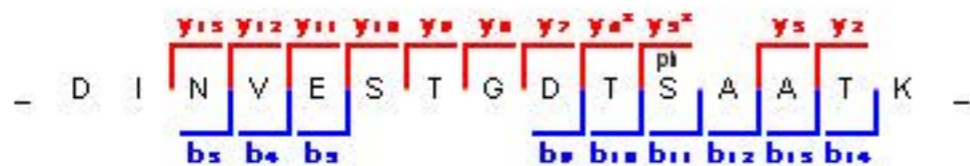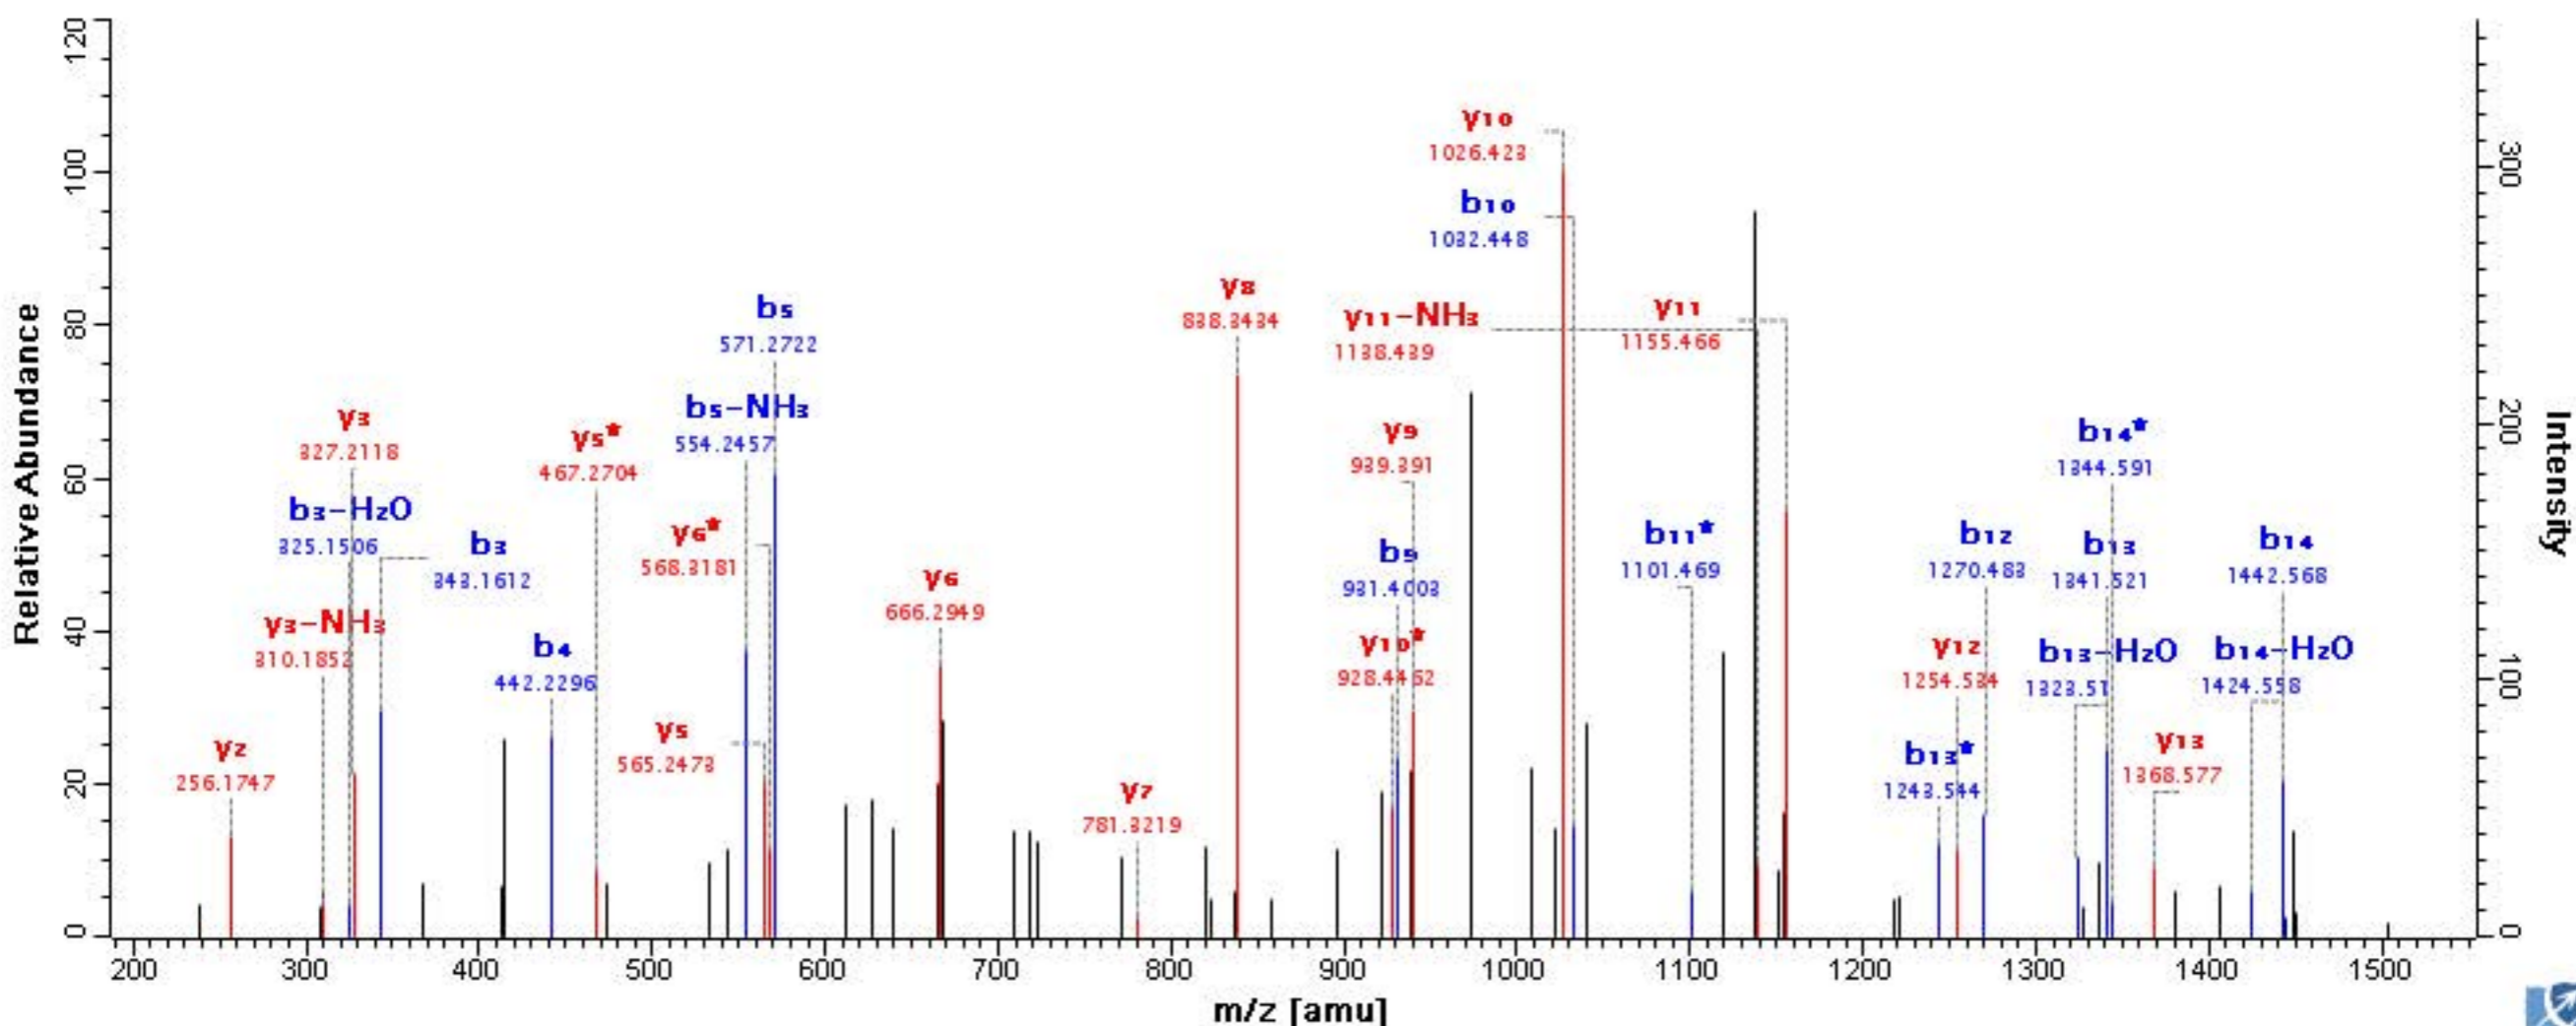

#### precursor information

|                   |                     |
|-------------------|---------------------|
| Mass:             | 1587.66654          |
| m/z:              | System.Collections. |
| Charge:           | System.Collections. |
| Retentiontime:    | System.Collections. |
| Score:            | 159.6945            |
| Mass Error [ppm]: | 0.010843            |
| PEP:              | 1.279E-17           |
| Precursor Type:   | MULTI               |

#### general information

|                       |           |
|-----------------------|-----------|
| Annotation:           | 12 of 15  |
| AminoAcids Coverag    | 80 %      |
| Intensity Coverage:   | 52 %      |
| Protein Localisation: | 62 ... 76 |

| b ion      |                |    |     |    |                | y ion      |  |
|------------|----------------|----|-----|----|----------------|------------|--|
| Δ dalton   | mass           |    | seq |    | Δ dalton       | mass       |  |
|            | 116.034219499  | 1  | D   | 14 |                |            |  |
|            | 229.118283479  | 2  | I   | 13 | 1481.661058406 |            |  |
| -0.0513476 | 343.161210926  | 3  | N   | 12 | 1368.576994425 | +0.114656  |  |
| +0.1448869 | 442.229624842  | 4  | V   | 11 | 1254.534066978 | -0.011606  |  |
| -0.0315563 | 571.272217939  | 5  | E   | 10 | 1155.465653062 | +0.0782923 |  |
|            | 658.304246349  | 6  | S   | 9  | 1026.423059966 | -0.0065561 |  |
|            | 759.351924823  | 7  | T   | 8  | 939.391031556  | +0.2569177 |  |
|            | 816.373388546  | 8  | G   | 7  | 838.343353082  | +0.0431826 |  |
| -0.013857  | 931.400331578  | 9  | D   | 6  | 781.321889358  | -0.3679099 |  |
| -0.055554  | 1032.448010052 | 10 | T   | 5  | 666.294946326  | +0.1416381 |  |
|            | 1199.446368871 | 11 | S   | 4  | 565.247267852  | +0.0090798 |  |
| -0.0690539 | 1270.483482658 | 12 | A   | 3  | 398.248909033  |            |  |
| +0.21622   | 1341.520596446 | 13 | A   | 2  | 327.211795246  | +0.164517  |  |
| +0.2585073 | 1442.56827492  | 14 | T   | 1  | 256.174681458  | +0.1295483 |  |
|            |                | 15 | K   | 0  | 155.127002984  |            |  |

Source: 20120514\_VR\_Bsu\_TripleSILACrep1\_pL2ESLS\_F21  
 Scannumber: 5972  
 Protein: BSU13900; ptsH  
 Peptide Score: 162.38  
 Method: ITMS; CID; 3

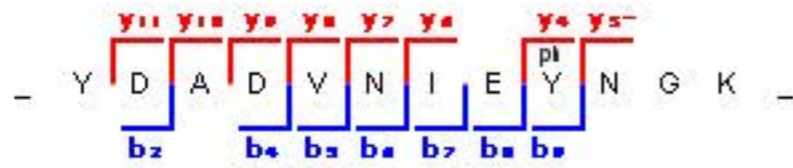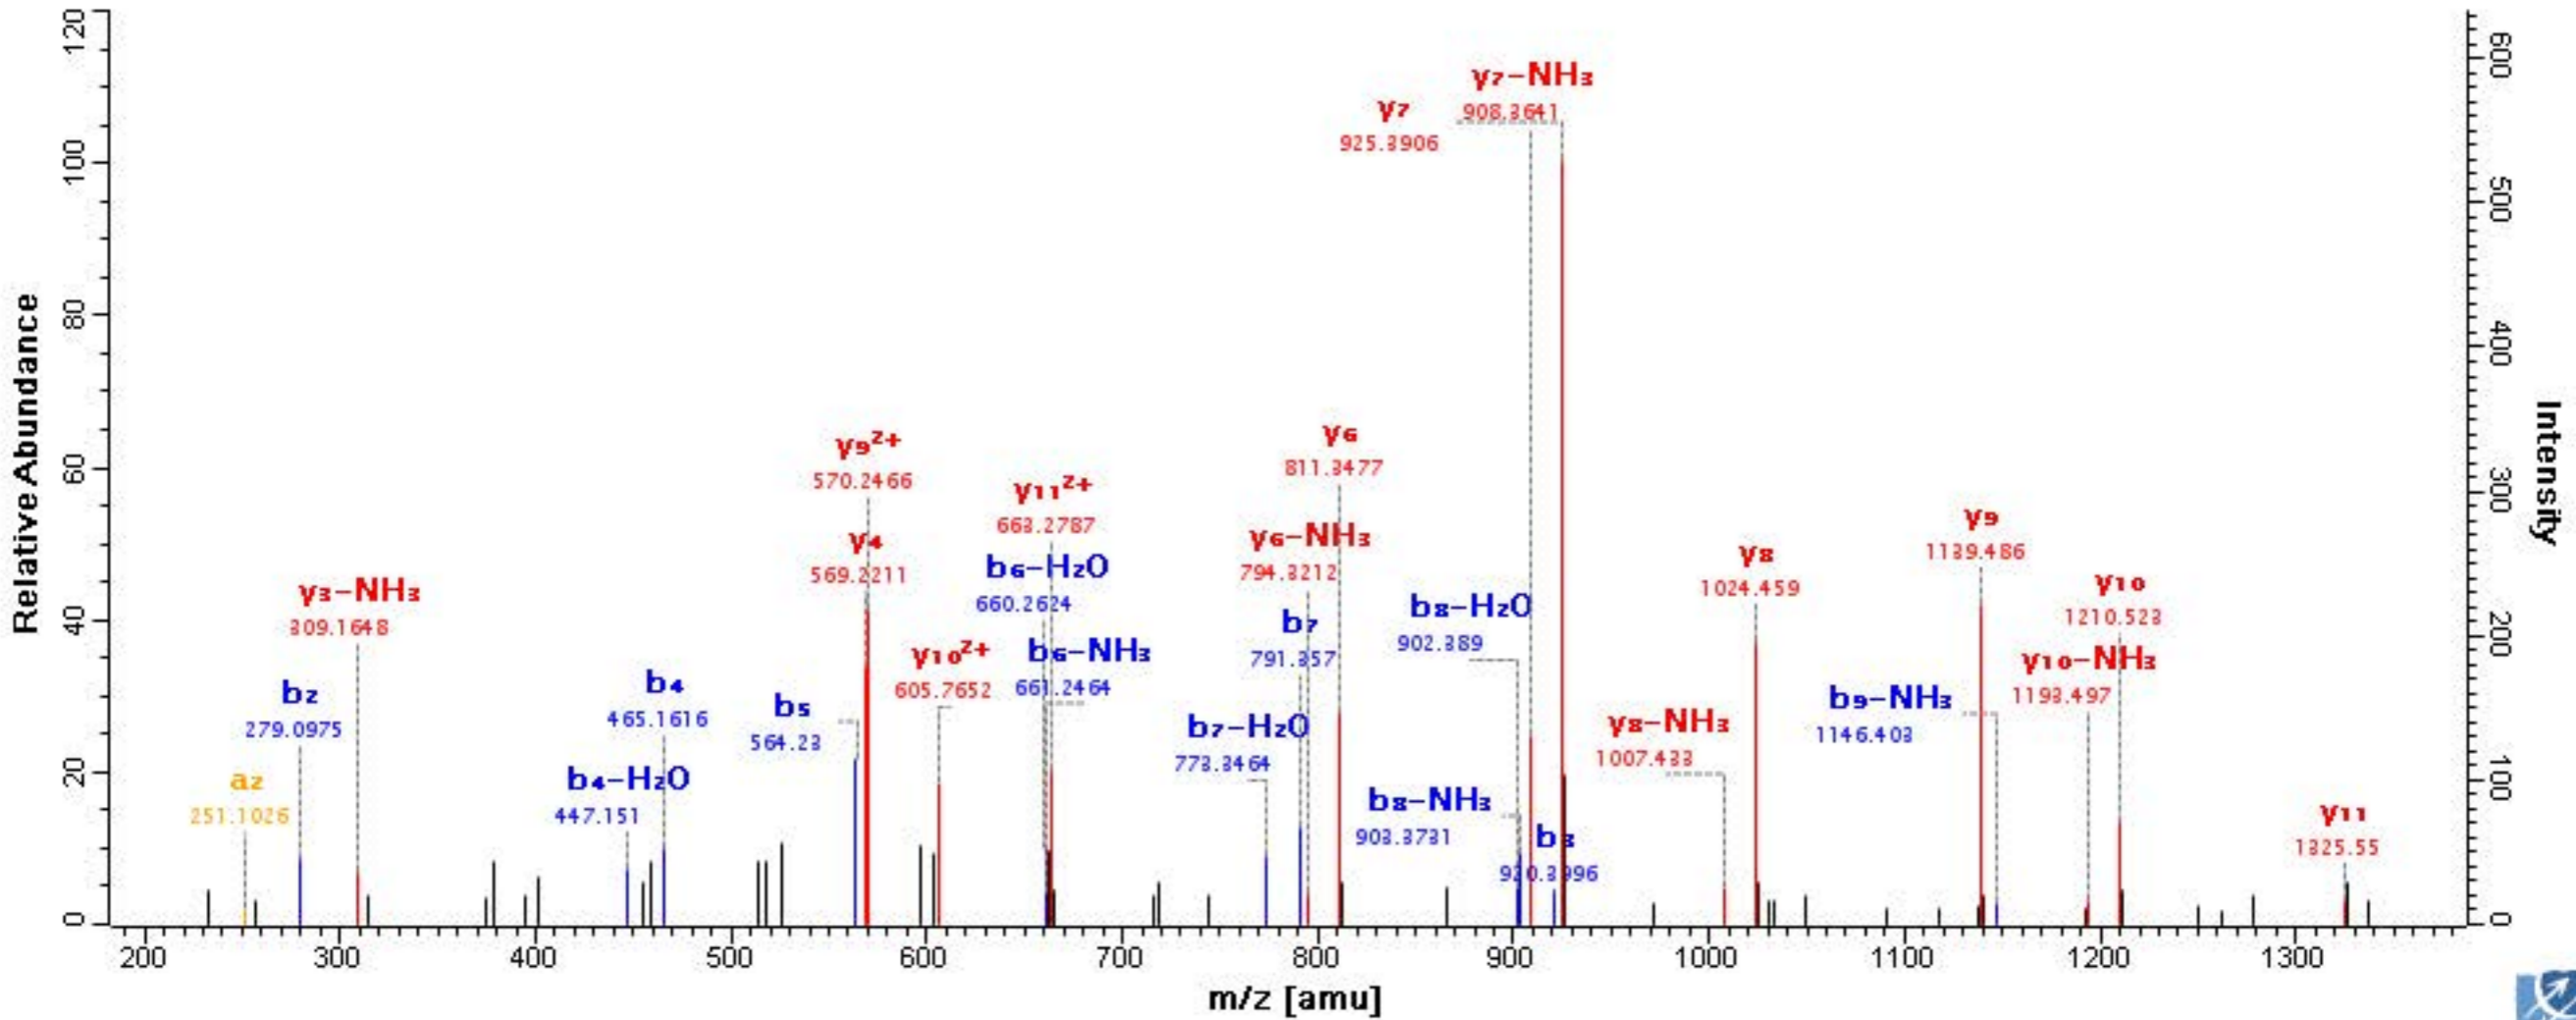

#### precursor information

|                   |                     |
|-------------------|---------------------|
| Mass:             | 1487.60598          |
| m/z:              | System.Collections. |
| Charge:           | System.Collections. |
| Retentiontime:    | System.Collections. |
| Score:            | 162.3797            |
| Mass Error [ppm]: | -0.082306           |
| PEP:              | 4.3103E-23          |
| Precursor Type:   | ISO                 |

#### general information

|                       |           |
|-----------------------|-----------|
| Annotation:           | 9 of 12   |
| AminoAcids Coverag    | 75 %      |
| Intensity Coverage:   | 70 %      |
| Protein Localisation: | 29 ... 40 |

| a ion     |          | b ion     |          |     | γ ion |          |          | γ <sup>2+</sup> ion |          |
|-----------|----------|-----------|----------|-----|-------|----------|----------|---------------------|----------|
| Δ dalton  | mass     | Δ dalton  | mass     | seq |       | Δ dalton | mass     | Δ dalton            | mass     |
|           | 136.0757 |           | 164.0706 | 1   | Y     | 11       |          |                     |          |
| +0.014707 | 251.1026 | +0.075212 | 279.0975 | 2   | D     | 10       | 1325.55  | -0.158572           | 663.2787 |
|           | 322.1397 |           | 350.1347 | 3   | A     | 9        | 1210.523 | +0.066125           | 605.7652 |
|           | 437.1667 | +0.167253 | 465.1616 | 4   | D     | 8        | 1139.486 | +0.100797           | 570.2466 |
|           | 536.2351 | -0.407753 | 564.23   | 5   | V     | 7        | 1024.459 | +0.041193           | 1024.459 |
|           | 650.278  |           | 678.2729 | 6   | N     | 6        | 925.3906 | +0.014453           | 925.3906 |
|           | 763.3621 | -0.120133 | 791.357  | 7   | I     | 5        | 811.3477 | +0.070564           | 811.3477 |
|           | 892.4047 | -0.153937 | 920.3996 | 8   | E     | 4        | 698.2636 |                     | 698.2636 |
|           | 1135.434 |           | 1163.429 | 9   | Y     | 3        | 569.2211 | +0.073686           | 569.2211 |
|           | 1249.477 |           | 1277.472 | 10  | N     | 2        | 326.1914 |                     | 326.1914 |
|           | 1306.499 |           | 1334.494 | 11  | G     | 1        | 212.1485 |                     | 212.1485 |
|           |          |           |          | 12  | K     | 0        | 155.127  |                     | 155.127  |

Source: 20120514\_VR\_Bsu\_TripleSILACrep1\_pL2ESLS\_F21  
 Scannumber: 6270  
 Protein: BSU23070; serA  
 Peptide Score: 124.25  
 Method: ITMS; CID; 3

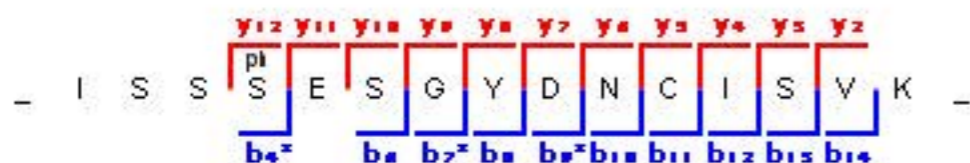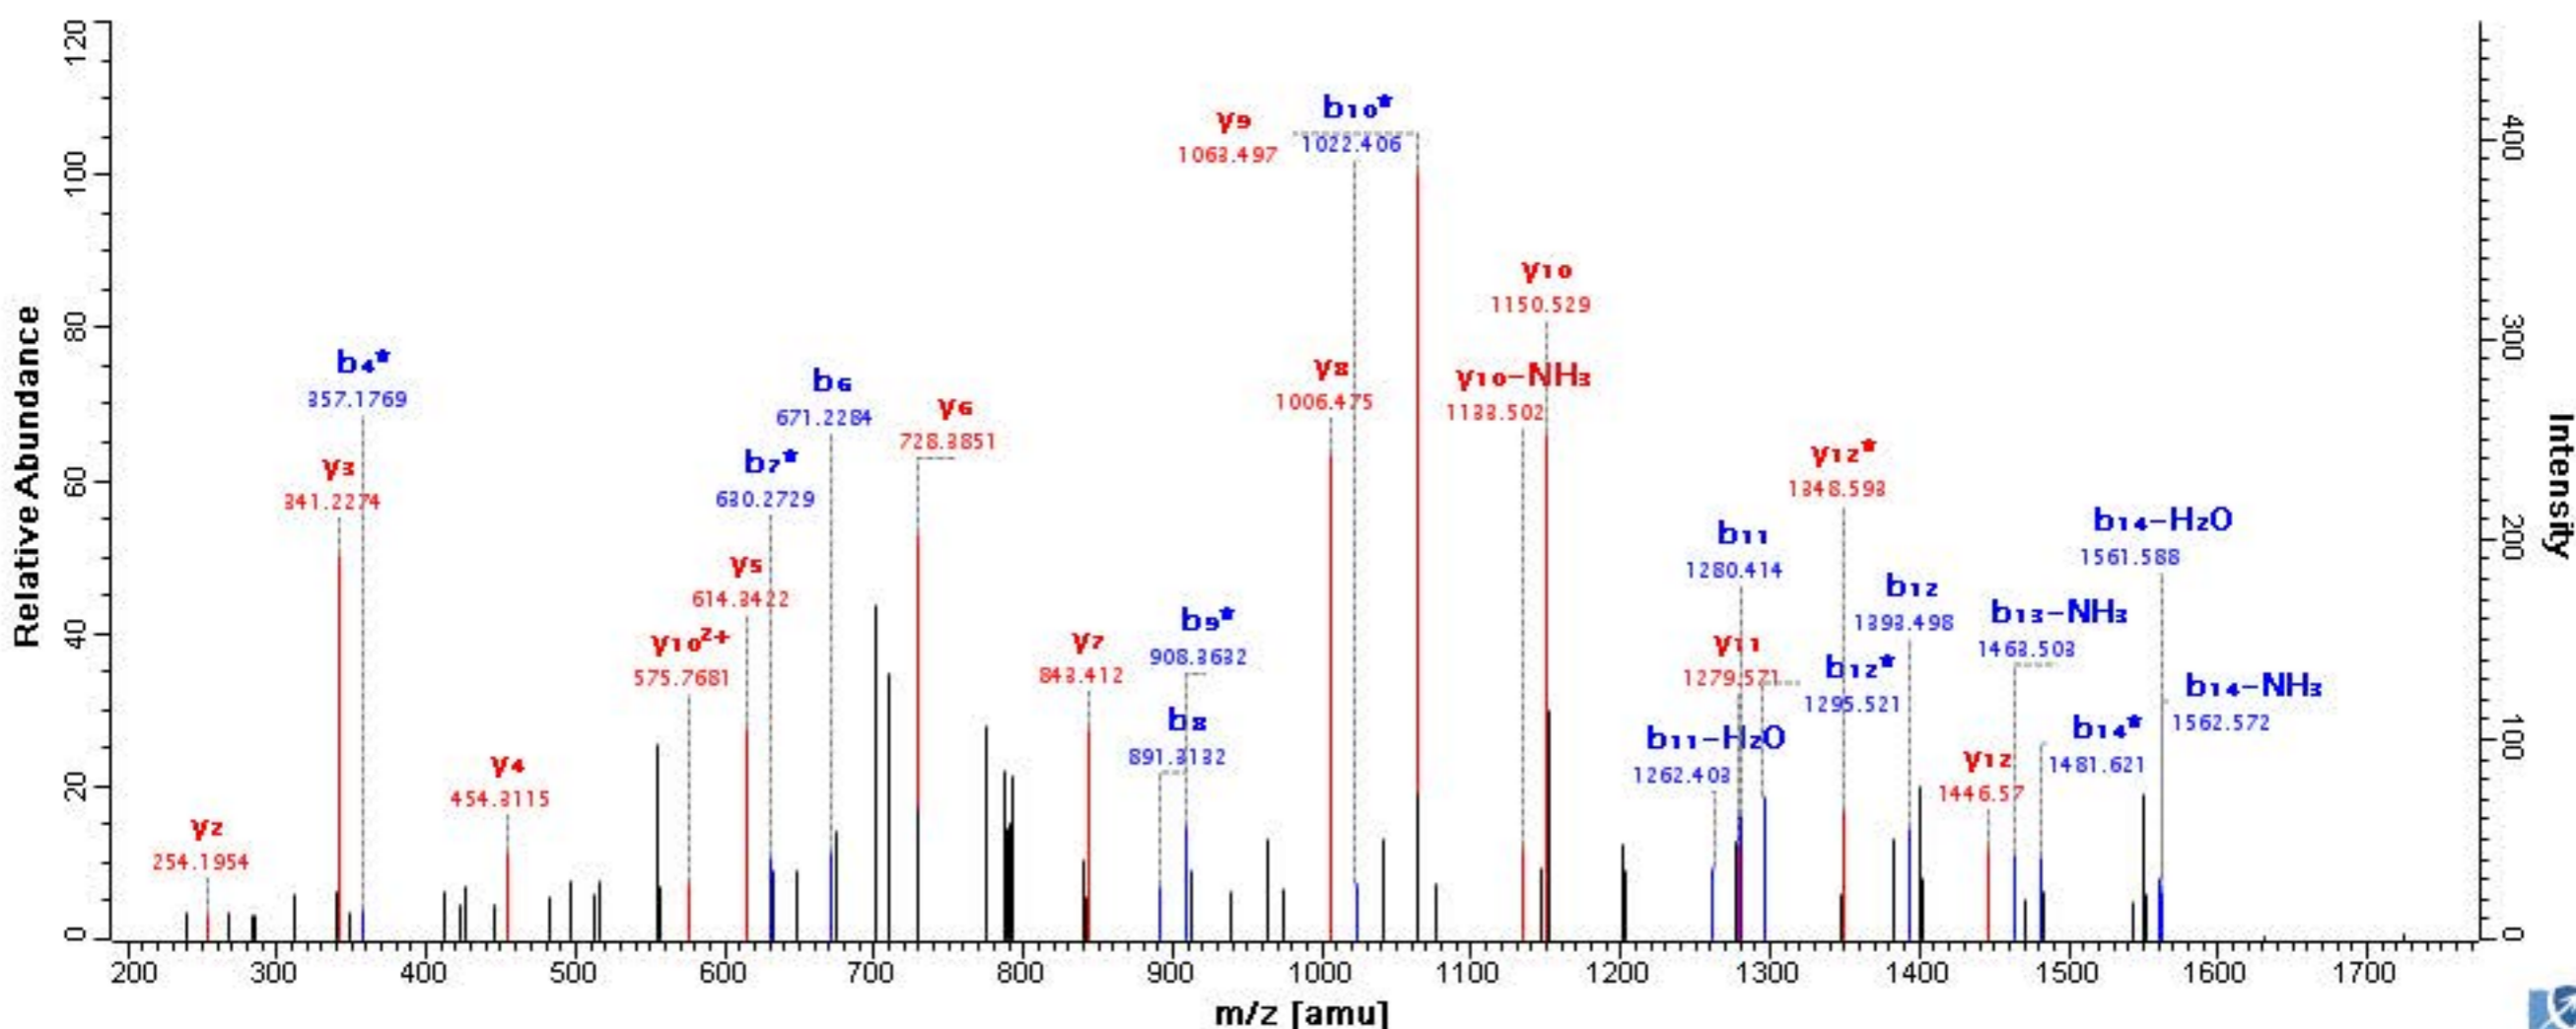

#### precursor information

|                   |                     |
|-------------------|---------------------|
| Mass:             | 1732.71076          |
| m/z:              | System.Collections. |
| Charge:           | System.Collections. |
| Retentiontime:    | System.Collections. |
| Score:            | 124.2509            |
| Mass Error [ppm]: | 0.068434            |
| PEP:              | 0.00040583          |
| Precursor Type:   | ISO                 |

| b ion      |              |    |     |    | gamma ion    |            | gamma <sup>2+</sup> ion |            |
|------------|--------------|----|-----|----|--------------|------------|-------------------------|------------|
| Δ dalton   | mass         |    | seq |    | Δ dalton     | mass       | Δ dalton                | mass       |
|            | 114.09134045 | 1  | I   | 14 |              |            |                         |            |
|            | 201.12336886 | 2  | S   | 13 | 1620.6338574 |            | 1620.6338574            |            |
|            | 288.15539727 | 3  | S   | 12 | 1533.601829  |            | 1533.601829             |            |
|            | 455.15375609 | 4  | S   | 11 | 1446.5698006 | +0.0394524 | 1446.5698006            |            |
|            | 584.19634918 | 5  | E   | 10 | 1279.5714417 | -0.2468568 | 1279.5714417            |            |
| -0.2928918 | 671.22837759 | 6  | S   | 9  | 1150.5288486 | -0.0151768 | 575.76806255            | -0.2006797 |
|            | 728.24984131 | 7  | G   | 8  | 1063.4968202 | +0.0207579 | 1063.4968202            |            |
| +0.2191177 | 891.31316985 | 8  | Y   | 7  | 1006.4753565 | +0.027329  | 1006.4753565            |            |
|            | 1006.3401129 | 9  | D   | 6  | 843.41202797 | +0.0967001 | 843.41202797            |            |
|            | 1120.3830403 | 10 | N   | 5  | 728.38508494 | +0.0630962 | 728.38508494            |            |
| -0.0540694 | 1280.4136885 | 11 | C   | 4  | 614.34215749 | -0.00268   | 614.34215749            |            |
| +0.2228285 | 1393.4977525 | 12 | I   | 3  | 454.31150929 | +0.0646504 | 454.31150929            |            |
|            | 1480.5297809 | 13 | S   | 2  | 341.22744531 | +0.0691245 | 341.22744531            |            |
|            | 1579.5981948 | 14 | V   | 1  | 254.1954169  | +0.0508142 | 254.1954169             |            |
|            |              | 15 | K   | 0  | 155.12700298 |            | 155.12700298            |            |

#### general information

|                       |             |
|-----------------------|-------------|
| Annotation:           | 11 of 15    |
| AminoAcids Coverag    | 73 %        |
| Intensity Coverage:   | 49 %        |
| Protein Localisation: | 400 ... 414 |

Source: 20120514\_VR\_Bsu\_TripleSILACrep1\_pL2ESLS\_F21  
 Scannumber: 6590  
 Protein: BSU13620; mtnD; ykrZ  
 Peptide Score: 109.83  
 Method: ITMS; CID; 3

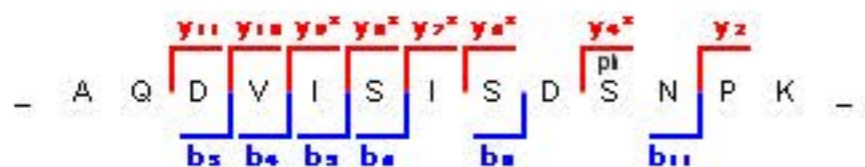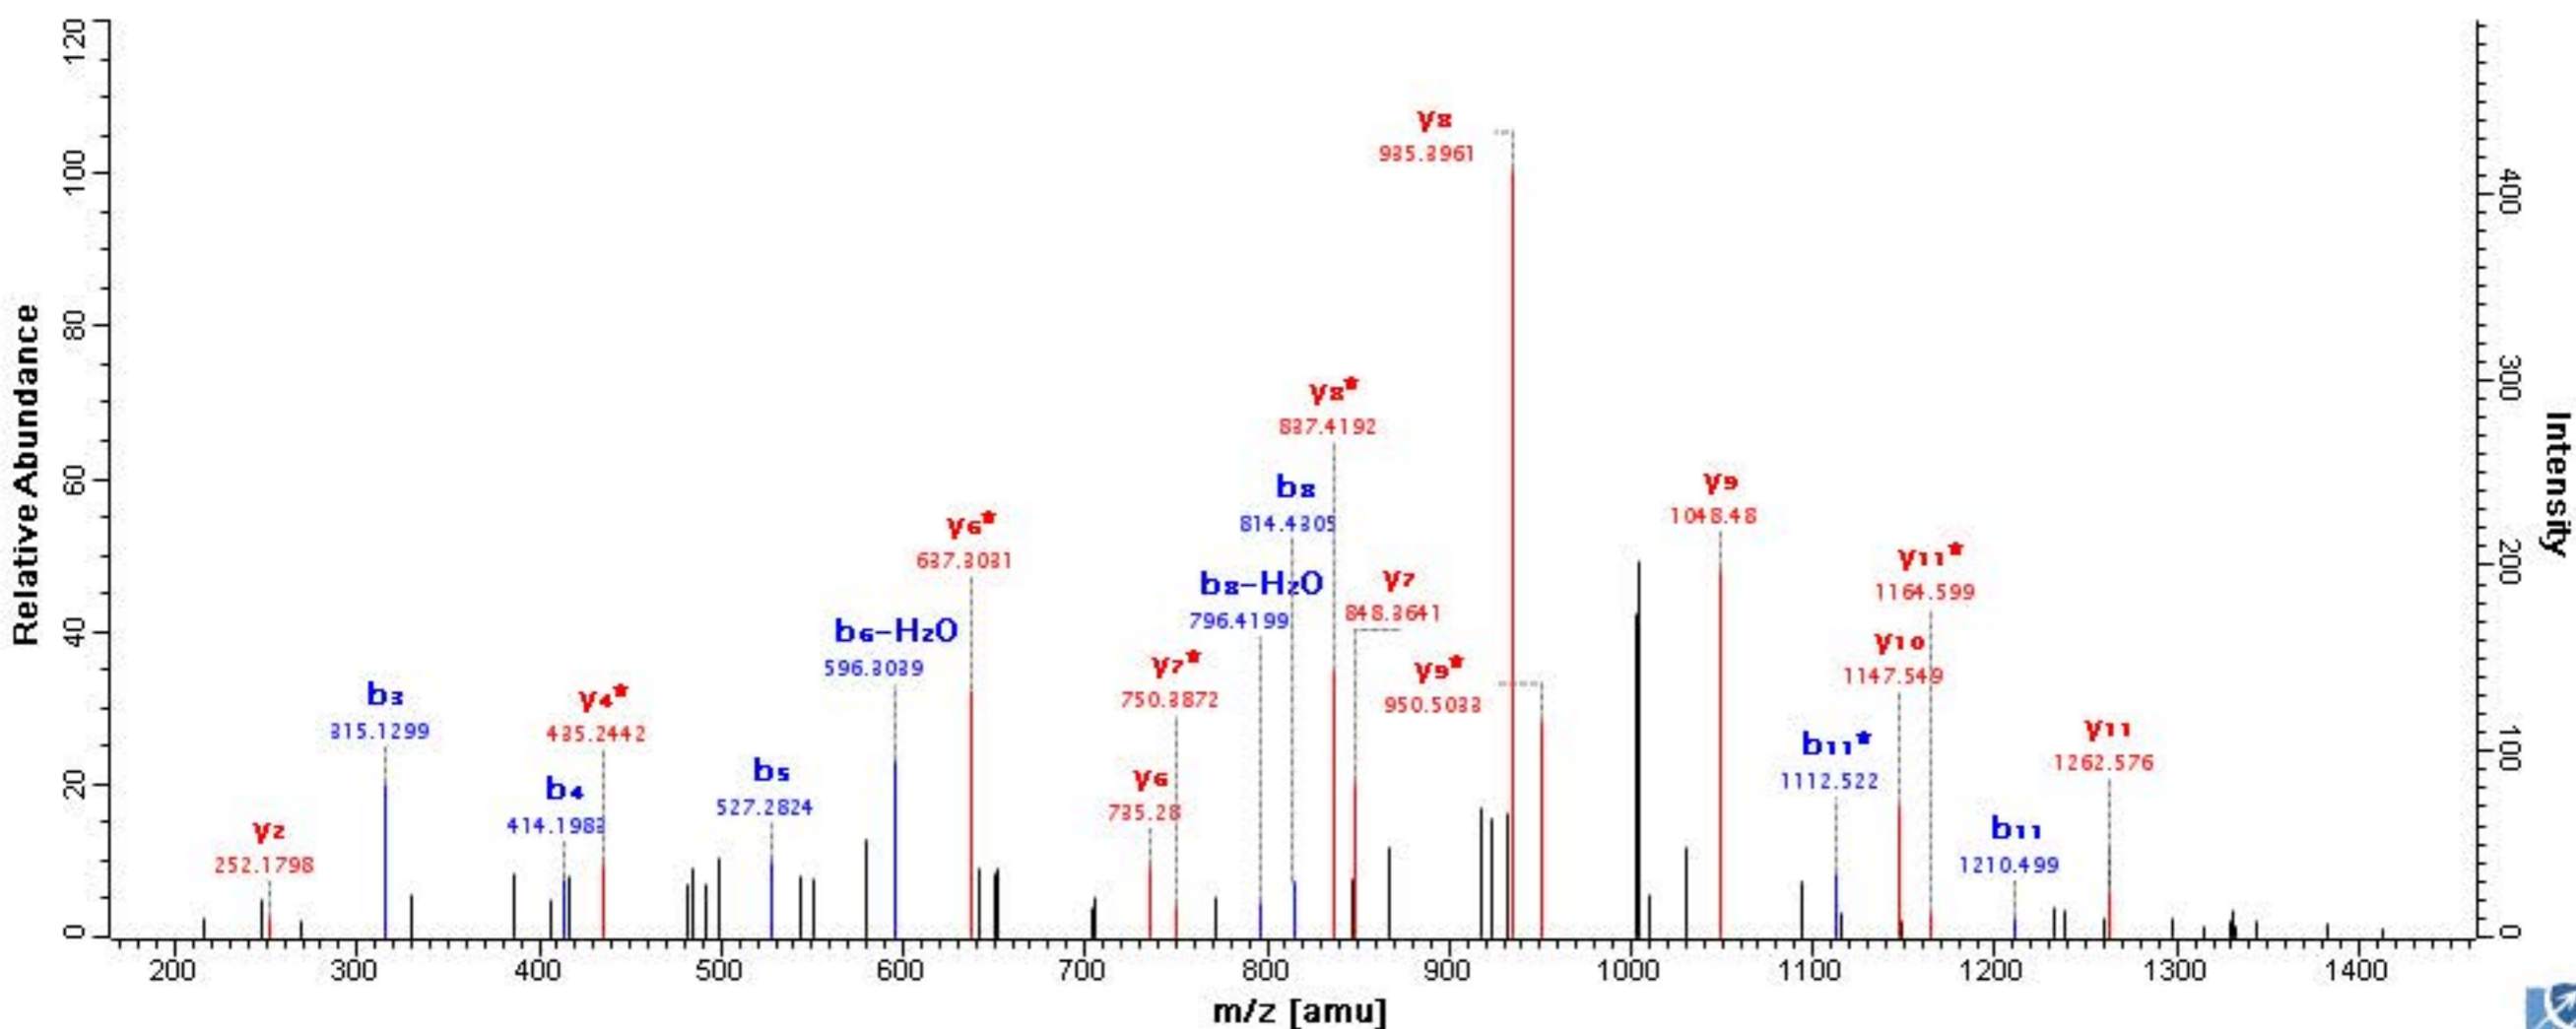

#### precursor information

|                   |                     |
|-------------------|---------------------|
| Mass:             | 1452.6492           |
| m/z:              | System.Collections. |
| Charge:           | System.Collections. |
| Retentiontime:    | System.Collections. |
| Score:            | 109.8349            |
| Mass Error [ppm]: | -0.37622            |
| PEP:              | 0.00032355          |
| Precursor Type:   | MULTI               |

#### general information

|                       |           |
|-----------------------|-----------|
| Annotation:           | 9 of 13   |
| AminoAcids Coverag    | 69 %      |
| Intensity Coverage:   | 51 %      |
| Protein Localisation: | 76 ... 88 |

| b ion      |                |    |     |    |                | γ ion      |  |
|------------|----------------|----|-----|----|----------------|------------|--|
| Δ dalton   | mass           |    | seq |    | Δ dalton       | mass       |  |
|            | 72.044390254   | 1  | A   | 12 |                |            |  |
|            | 200.102967766  | 2  | Q   | 11 | 1390.634115374 |            |  |
| -0.0227331 | 315.129910798  | 3  | D   | 10 | 1262.575537862 | +0.2903069 |  |
| +0.1243071 | 414.198324714  | 4  | V   | 9  | 1147.54859483  | +0.1165663 |  |
| +0.0910244 | 527.282388694  | 5  | I   | 8  | 1048.480180914 | -0.0749075 |  |
|            | 614.314417104  | 6  | S   | 7  | 935.396116933  | -0.0228259 |  |
|            | 727.398481085  | 7  | I   | 6  | 848.364088524  | -0.0045304 |  |
| +0.105013  | 814.430509495  | 8  | S   | 5  | 735.280024543  | +0.1065111 |  |
|            | 929.457452527  | 9  | D   | 4  | 648.247996133  |            |  |
|            | 1096.455811345 | 10 | S   | 3  | 533.221053101  |            |  |
| +0.1040444 | 1210.498738792 | 11 | N   | 2  | 366.222694283  |            |  |
|            | 1307.551502644 | 12 | P   | 1  | 252.179766836  | -0.038974  |  |
|            |                | 13 | K   | 0  | 155.127002984  |            |  |

Source: 20120514\_VR\_Bsu\_TripleSILACrep1\_pL2ESLS\_F21  
 Scannumber: 6953  
 Protein: azoR2; BSU33540; yvaB  
 Peptide Score: 208.39  
 Method: ITMS; CID; 3

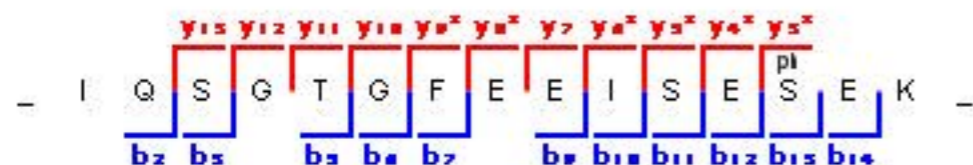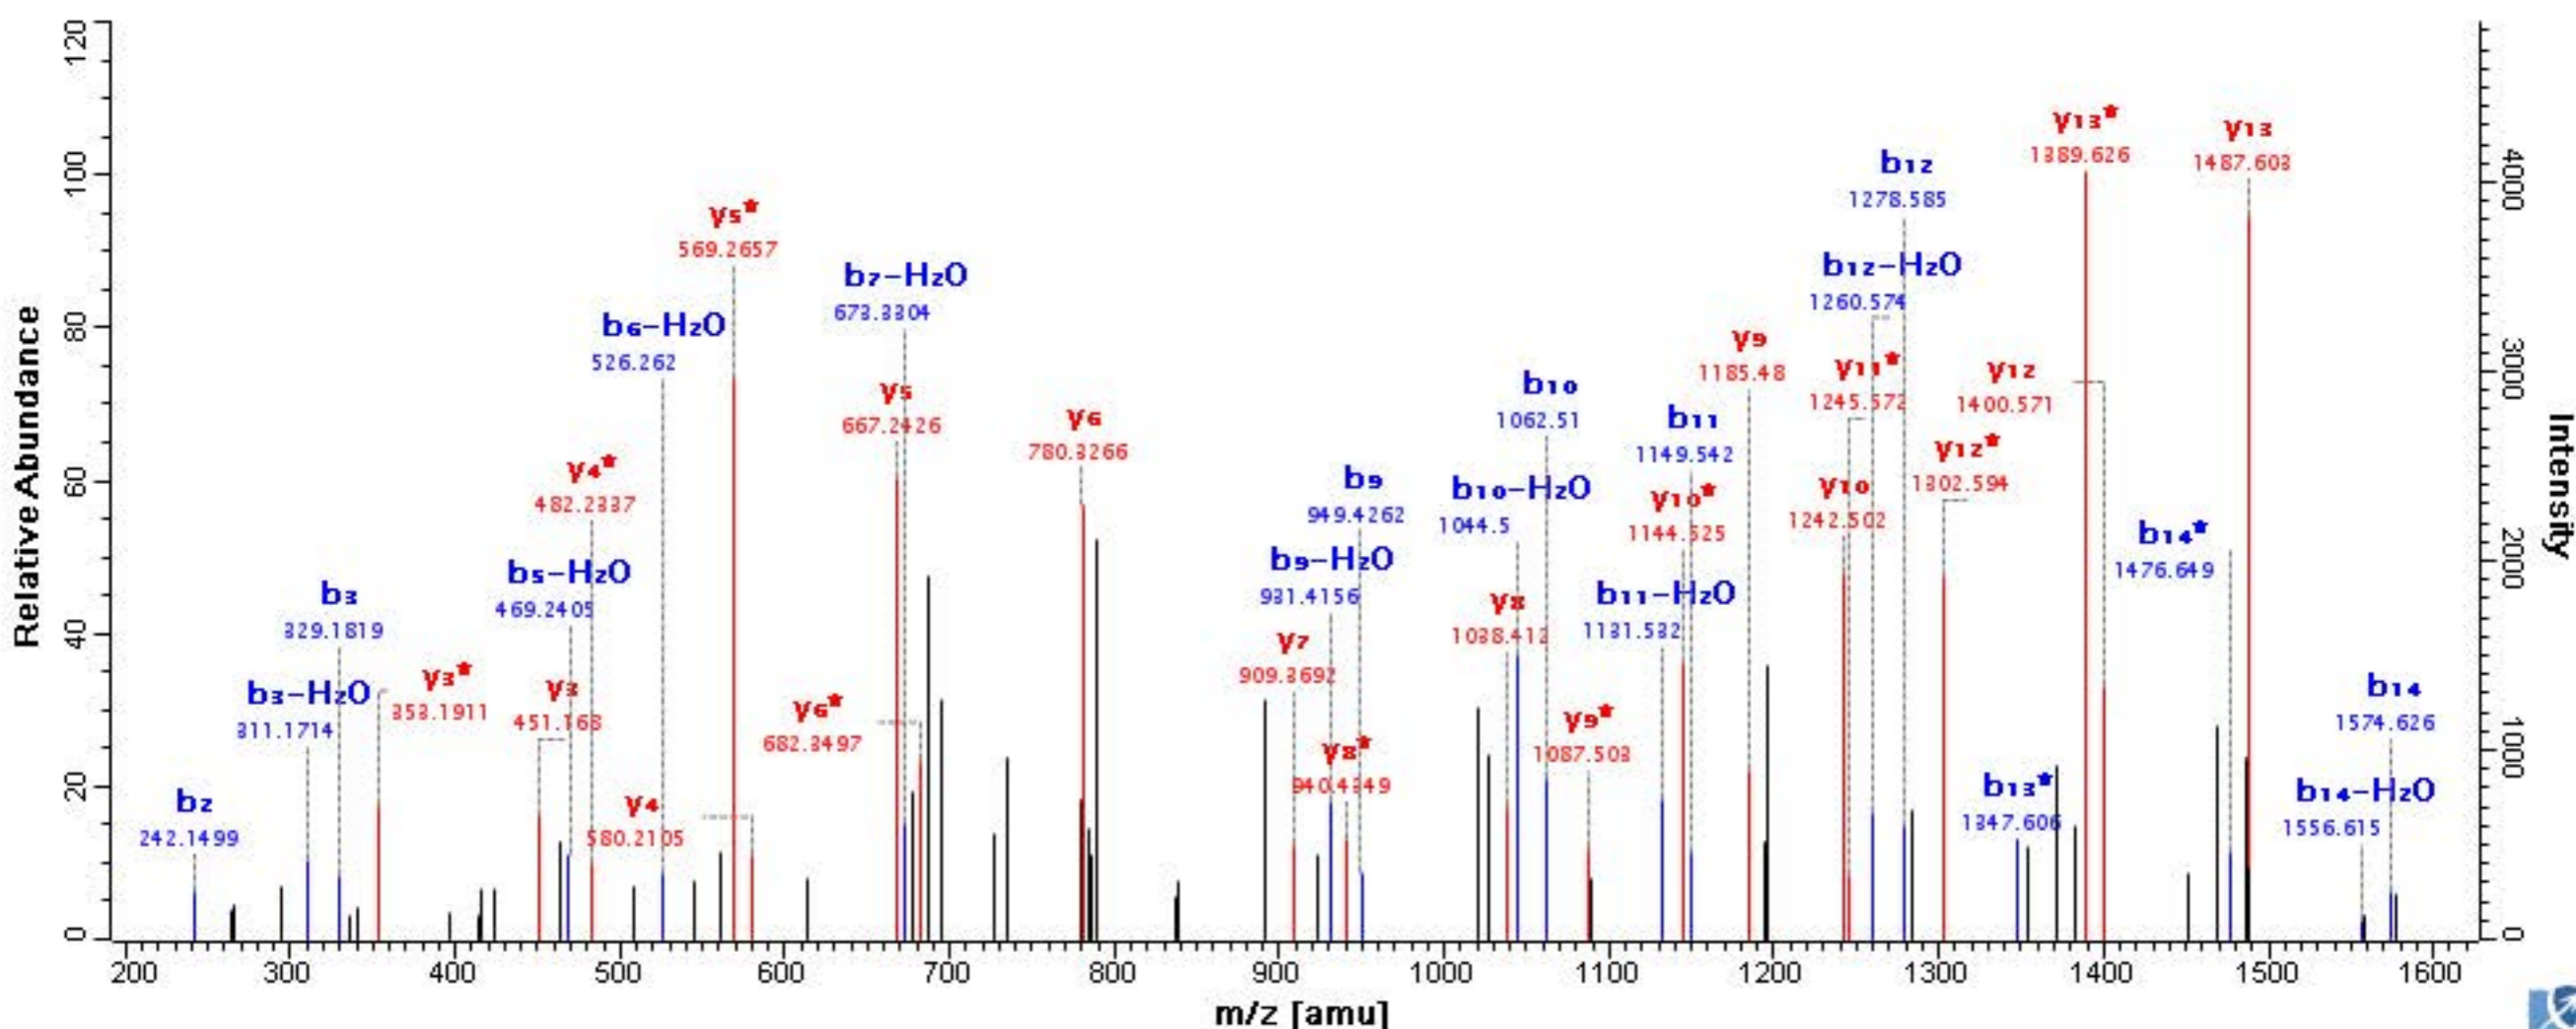

#### precursor information

|                   |                     |
|-------------------|---------------------|
| Mass:             | 1727.7388           |
| m/z:              | System.Collections. |
| Charge:           | System.Collections. |
| Retentiontime:    | System.Collections. |
| Score:            | 208.3862            |
| Mass Error [ppm]: | 0.32179             |
| PEP:              | 1.4473E-105         |
| Precursor Type:   | ISO                 |

#### general information

|                       |           |
|-----------------------|-----------|
| Annotation:           | 13 of 15  |
| AminoAcids Coverag    | 87 %      |
| Intensity Coverage:   | 59 %      |
| Protein Localisation: | 63 ... 77 |

| b ion      |                | seq |   |    |                | gamma ion  |      |
|------------|----------------|-----|---|----|----------------|------------|------|
| Δ dalton   | mass           |     |   |    |                | Δ dalton   | mass |
|            | 114.091340447  | 1   | I | 14 |                |            |      |
| +0.2272793 | 242.149917958  | 2   | Q | 13 | 1615.661452336 |            |      |
| +0.0662836 | 329.181946368  | 3   | S | 12 | 1487.602874825 | +0.1274719 |      |
|            | 386.203410092  | 4   | G | 11 | 1400.570846415 | +0.0025178 |      |
|            | 487.251088566  | 5   | T | 10 | 1343.549382691 |            |      |
|            | 544.27255229   | 6   | G | 9  | 1242.501704217 | +0.0067186 |      |
|            | 691.340966206  | 7   | F | 8  | 1185.480240493 | +0.06224   |      |
|            | 820.383559302  | 8   | E | 7  | 1038.411826577 | -0.0461039 |      |
| +0.1732128 | 949.426152398  | 9   | E | 6  | 909.369233481  | -0.0173658 |      |
| -0.0197379 | 1062.510216379 | 10  | I | 5  | 780.326640385  | +0.2095535 |      |
| +0.063224  | 1149.542244788 | 11  | S | 4  | 667.242576404  | +0.0670549 |      |
| +0.0551768 | 1278.584837885 | 12  | E | 3  | 580.210547994  | +0.0575794 |      |
|            | 1445.583196703 | 13  | S | 2  | 451.167954898  | +0.0854631 |      |
| +0.0340002 | 1574.625789799 | 14  | E | 1  | 284.16959608   |            |      |
|            |                | 15  | K | 0  | 155.127002984  |            |      |

Source: 20120514\_VR\_Bsu\_TripleSILACrep1\_pL2ESLS\_F21  
 Scannumber: 7361  
 Protein: BSU25020; sodA; yggD  
 Peptide Score: 155.1  
 Method: ITMS; CID; 3

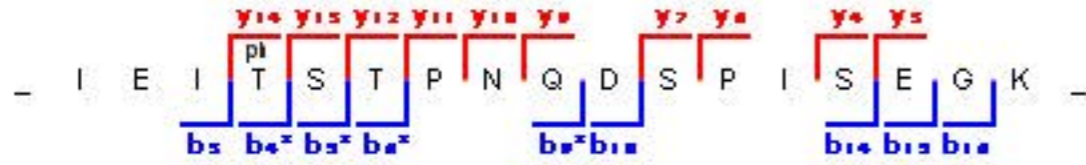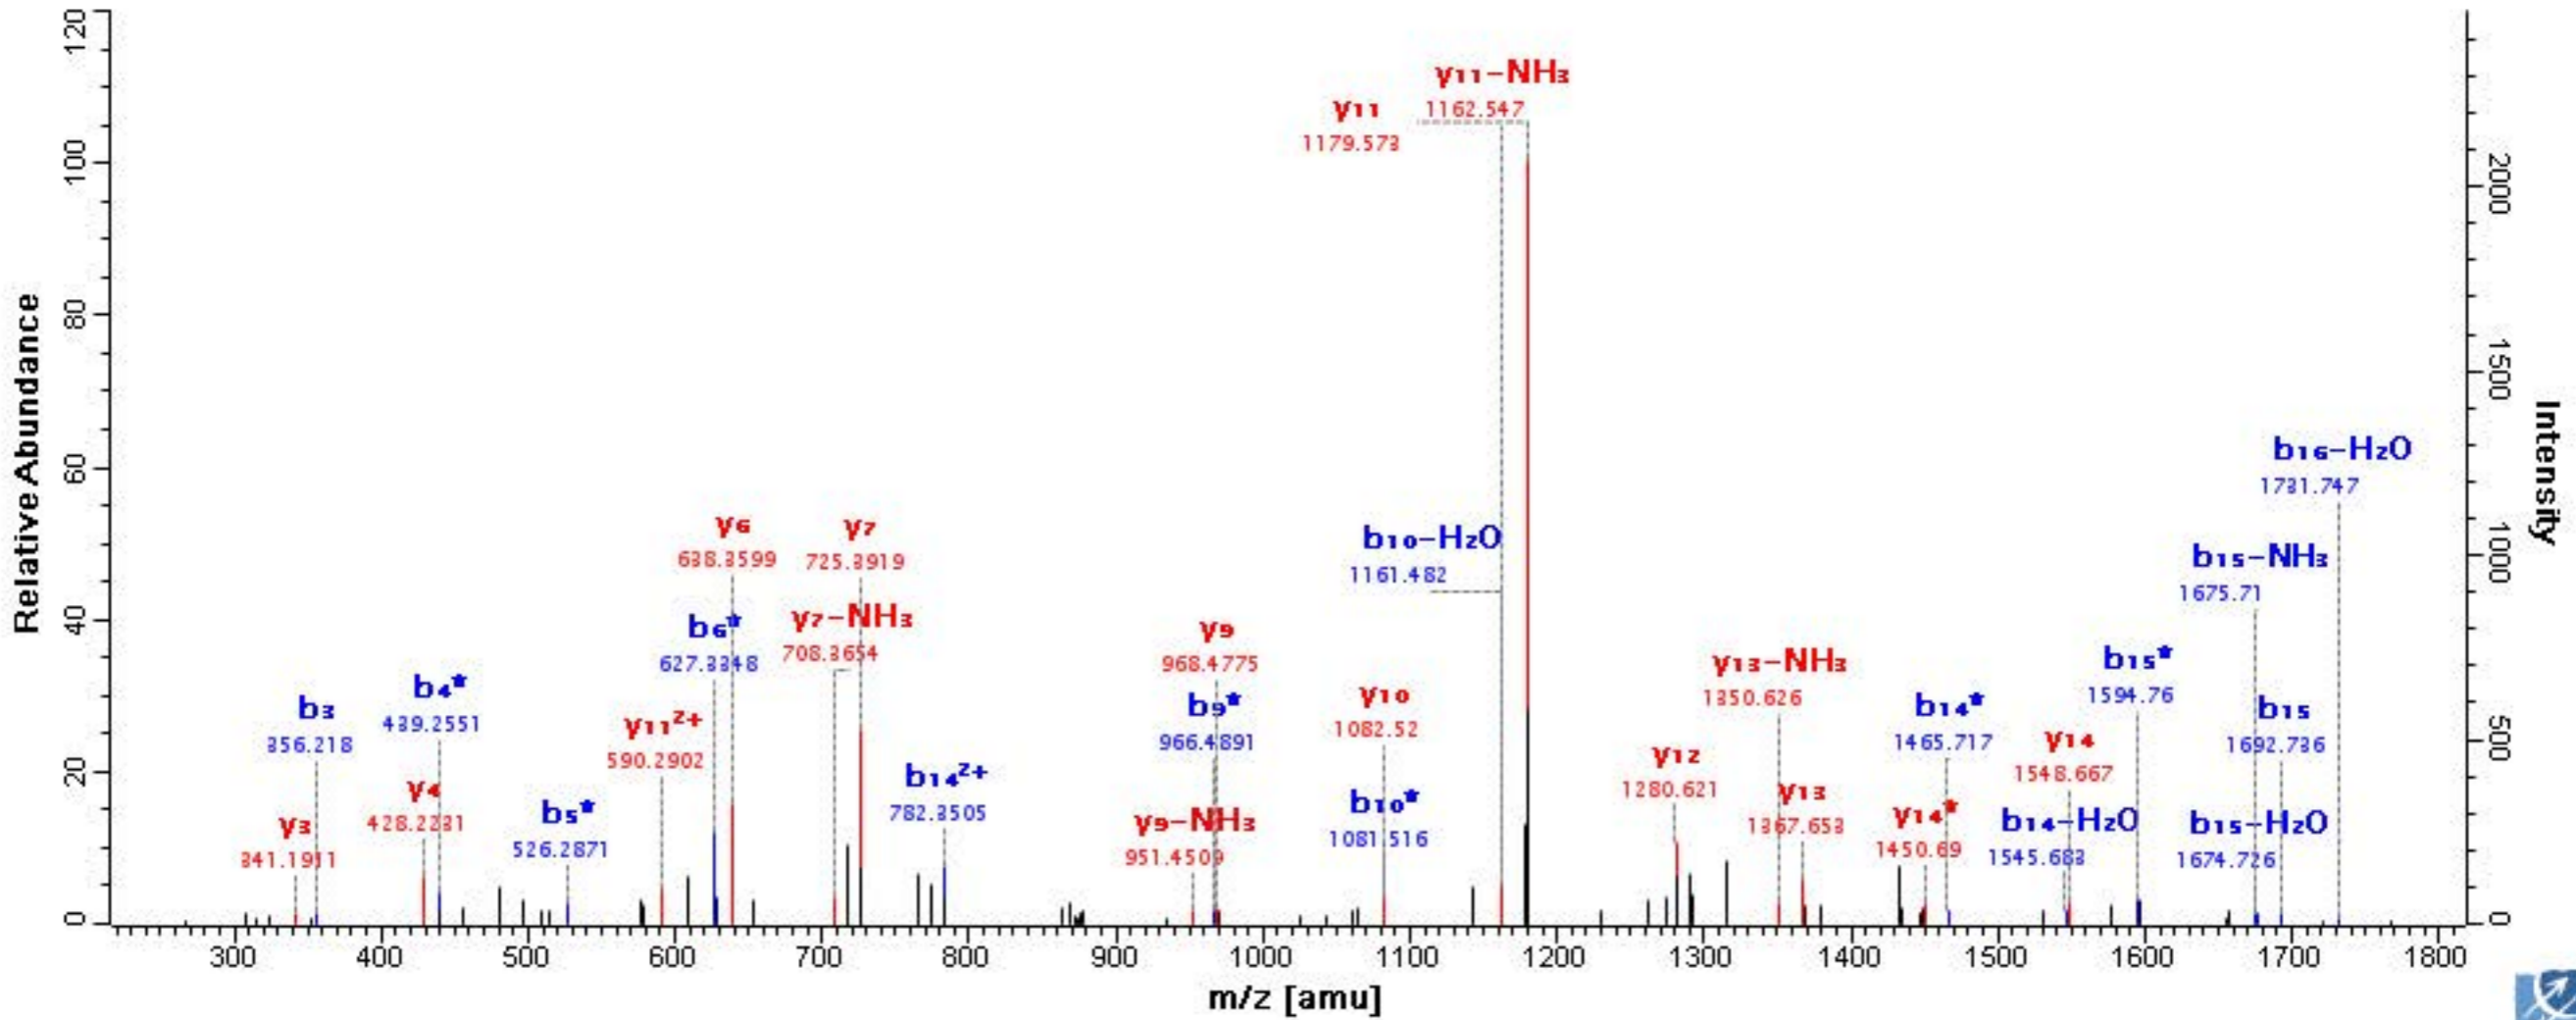

#### precursor information

|                   |                     |
|-------------------|---------------------|
| Mass:             | 1902.87069          |
| m/z:              | System.Collections. |
| Charge:           | System.Collections. |
| Retentiontime:    | System.Collections. |
| Score:            | 155.0969            |
| Mass Error [ppm]: | 0.19388             |
| PEP:              | 2.2204E-19          |
| Precursor Type:   | ISO                 |

| b <sup>2+</sup> ion |          | b ion     |          | seq |   |    | y ion    |           | y <sup>2+</sup> ion |           |
|---------------------|----------|-----------|----------|-----|---|----|----------|-----------|---------------------|-----------|
| Δ dalton            | mass     | Δ dalton  | mass     |     |   |    | Δ dalton | mass      | Δ dalton            | mass      |
|                     | 114.0913 |           | 114.0913 | 1   | I | 16 |          |           |                     |           |
|                     | 243.1339 |           | 243.1339 | 2   | E | 15 | 1790.794 |           | 1790.794            |           |
|                     | 356.218  | +0.021382 | 356.218  | 3   | I | 14 | 1661.751 |           | 1661.751            |           |
|                     | 537.232  |           | 537.232  | 4   | T | 13 | 1548.667 | +0.306639 | 1548.667            |           |
|                     | 624.264  |           | 624.264  | 5   | S | 12 | 1367.653 | +0.128143 | 1367.653            |           |
|                     | 725.3117 |           | 725.3117 | 6   | T | 11 | 1280.621 | +0.218887 | 1280.621            |           |
|                     | 822.3645 |           | 822.3645 | 7   | P | 10 | 1179.573 | +0.106287 | 590.2902            | +0.240789 |
|                     | 936.4074 |           | 936.4074 | 8   | N | 9  | 1082.52  | +0.058831 | 1082.52             |           |
|                     | 1064.466 |           | 1064.466 | 9   | Q | 8  | 968.4775 | +0.048353 | 968.4775            |           |
|                     | 1179.493 |           | 1179.493 | 10  | D | 7  | 840.4189 |           | 840.4189            |           |
|                     | 1266.525 |           | 1266.525 | 11  | S | 6  | 725.3919 | +0.004357 | 725.3919            |           |
|                     | 1363.578 |           | 1363.578 | 12  | P | 5  | 638.3599 | +0.177682 | 638.3599            |           |
|                     | 1476.662 |           | 1476.662 | 13  | I | 4  | 541.3072 |           | 541.3072            |           |
| +0.141583           | 782.3505 |           | 1563.694 | 14  | S | 3  | 428.2231 | +0.038875 | 428.2231            |           |
|                     | 1692.736 | +0.007372 | 1692.736 | 15  | E | 2  | 341.1911 | -0.038838 | 341.1911            |           |
|                     | 1749.758 |           | 1749.758 | 16  | G | 1  | 212.1485 |           | 212.1485            |           |
|                     |          |           |          | 17  | K | 0  | 155.127  |           | 155.127             |           |

#### general information

|                       |             |
|-----------------------|-------------|
| Annotation:           | 14 of 17    |
| AminoAcids Coverag    | 82 %        |
| Intensity Coverage:   | 54 %        |
| Protein Localisation: | 141 ... 157 |





Source: 201205213\_VR\_Bsu\_TripleSILACrep1\_pL2ESLS\_F01  
 Scannumber: 10769  
 Protein: BSU28440; citF; sdhA  
 Peptide Score: 148.52  
 Method: ITMS; CID; 3

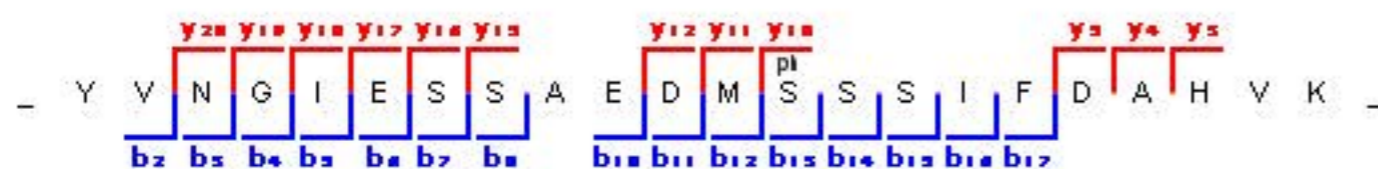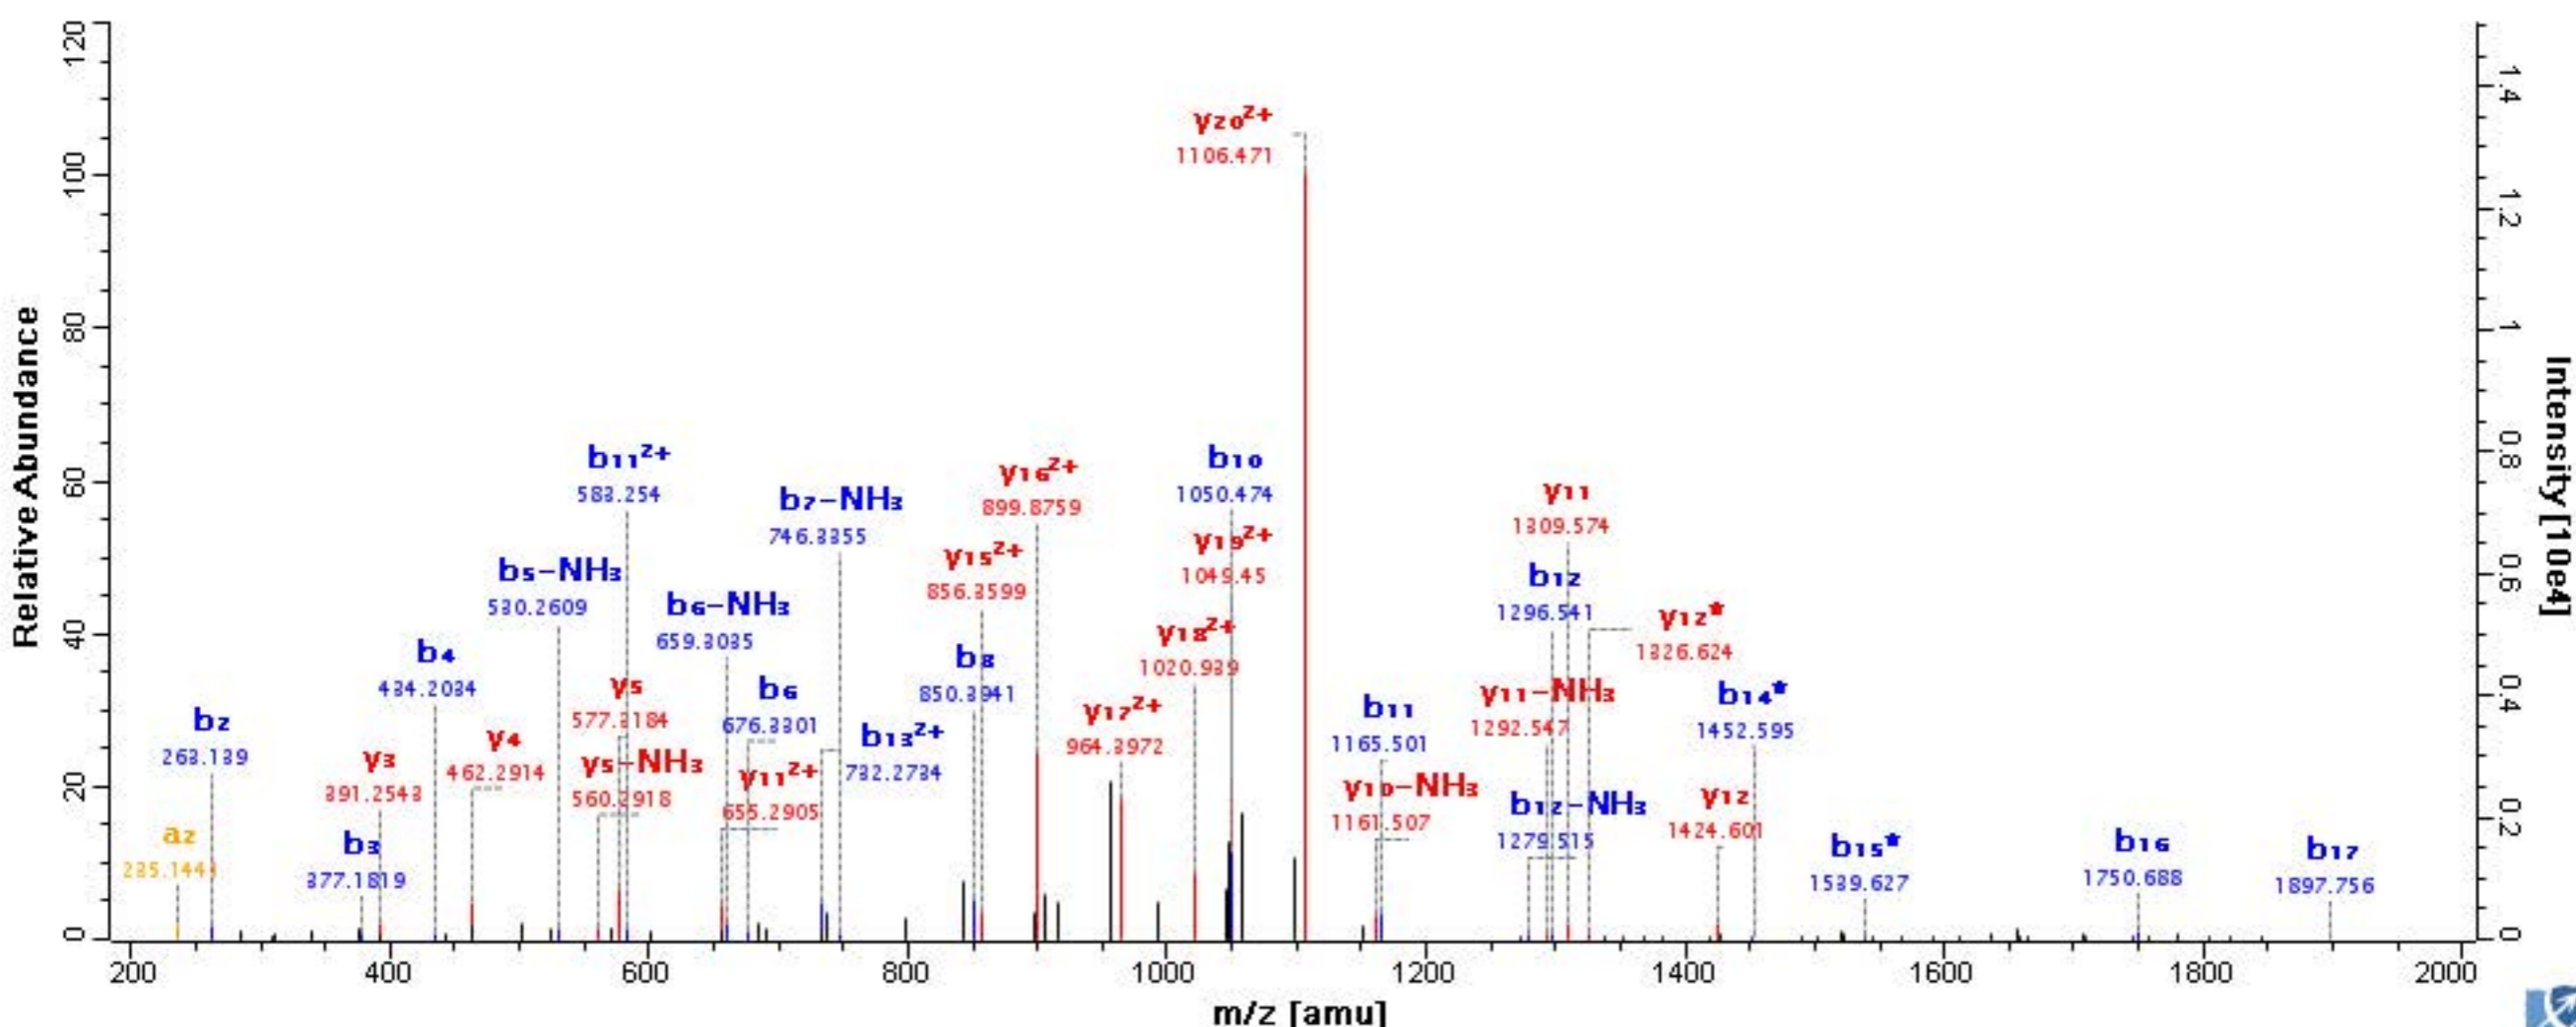

#### precursor information

|                   |                     |
|-------------------|---------------------|
| Mass:             | 2465.0453           |
| m/z:              | System.Collections. |
| Charge:           | System.Collections. |
| Retentiontime:    | System.Collections. |
| Score:            | 148.5208            |
| Mass Error [ppm]: | -0.19602            |
| PEP:              | 3.1818E-25          |
| Precursor Type:   | MULTI               |

| a ion    |         | b <sup>2+</sup> ion |         | b ion    |         |    |     | γ ion |          | γ <sup>2+</sup> ion |          |          |
|----------|---------|---------------------|---------|----------|---------|----|-----|-------|----------|---------------------|----------|----------|
| Δ dalton | mass    | Δ dalton            | mass    | Δ dalton | mass    |    | seq |       | Δ dalton | mass                | Δ dalton | mass     |
|          | 136.076 |                     | 164.071 |          | 164.071 | 1  | Y   | 21    |          |                     |          |          |
| +0.05122 | 235.144 |                     | 263.139 | +0.07116 | 263.139 | 2  | V   | 20    | 2311     |                     | 2311     |          |
|          | 349.187 |                     | 377.182 | +0.17047 | 377.182 | 3  | N   | 19    | 2211.94  |                     | 1106.47  | +0.3872  |
|          | 406.208 |                     | 434.203 | +0.04244 | 434.203 | 4  | G   | 18    | 2097.89  |                     | 1049.45  | -0.1909  |
|          | 519.293 |                     | 547.287 |          | 547.287 | 5  | I   | 17    | 2040.87  |                     | 1020.94  | +0.00776 |
|          | 648.335 |                     | 676.33  | -0.0184  | 676.33  | 6  | E   | 16    | 1927.79  |                     | 964.397  | +0.1656  |
|          | 735.367 |                     | 763.362 |          | 763.362 | 7  | S   | 15    | 1798.74  |                     | 899.876  | +0.21519 |
|          | 822.399 |                     | 850.394 | +0.47618 | 850.394 | 8  | S   | 14    | 1711.71  |                     | 856.36   | +0.25983 |
|          | 893.436 |                     | 921.431 |          | 921.431 | 9  | A   | 13    | 1624.68  |                     | 1624.68  |          |
|          | 1022.48 |                     | 1050.47 | -0.3498  | 1050.47 | 10 | E   | 12    | 1553.64  |                     | 1553.64  |          |
|          | 1137.51 | +0.00177            | 583.254 | +0.11886 | 1165.5  | 11 | D   | 11    | 1424.6   | -0.0403             | 1424.6   |          |
|          | 1268.55 |                     | 1296.54 | +0.08801 | 1296.54 | 12 | M   | 10    | 1309.57  | +0.11496            | 655.291  | -0.0851  |
|          | 1435.54 | +0.12871            | 732.273 |          | 1463.54 | 13 | S   | 9     | 1178.53  |                     | 1178.53  |          |
|          | 1522.58 |                     | 1550.57 |          | 1550.57 | 14 | S   | 8     | 1011.53  |                     | 1011.53  |          |
|          | 1609.61 |                     | 1637.6  |          | 1637.6  | 15 | S   | 7     | 924.503  |                     | 924.503  |          |
|          | 1722.69 |                     | 1750.69 | -0.0508  | 1750.69 | 16 | I   | 6     | 837.471  |                     | 837.471  |          |
|          | 1869.76 |                     | 1897.76 | +0.31794 | 1897.76 | 17 | F   | 5     | 724.387  |                     | 724.387  |          |
|          | 1984.79 |                     | 2012.78 |          | 2012.78 | 18 | D   | 4     | 577.318  | +0.01261            | 577.318  |          |
|          | 2055.83 |                     | 2083.82 |          | 2083.82 | 19 | A   | 3     | 462.291  | +0.15112            | 462.291  |          |
|          | 2192.88 |                     | 2220.88 |          | 2220.88 | 20 | H   | 2     | 391.254  | +0.02918            | 391.254  |          |
|          | 2291.95 |                     | 2319.95 |          | 2319.95 | 21 | V   | 1     | 254.195  |                     | 254.195  |          |
|          |         |                     |         |          |         | 22 | K   | 0     | 155.127  |                     | 155.127  |          |

#### general information

|                       |             |
|-----------------------|-------------|
| Annotation:           | 18 of 22    |
| AminoAcids Coverage:  | 82 %        |
| Intensity Coverage:   | 62 %        |
| Protein Localisation: | 409 ... 430 |

Source: 201205213\_VR\_Bsu\_TripleSILACrep1\_pL2ESLS\_F01  
 Scannumber: 11259  
 Protein: BSU39880; VE7D; yxaQ; yxbC  
 Peptide Score: 97.35  
 Method: ITMS; CID; 3

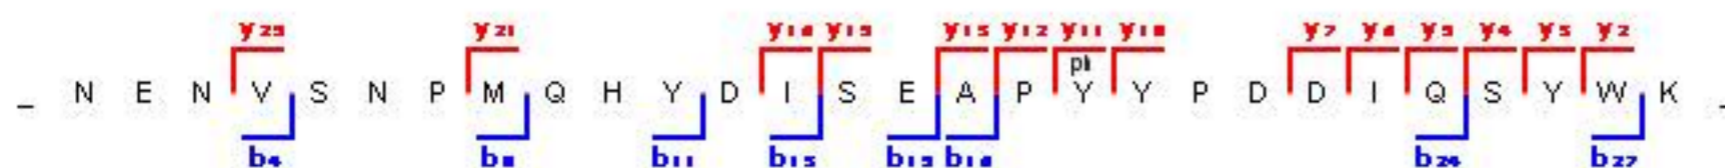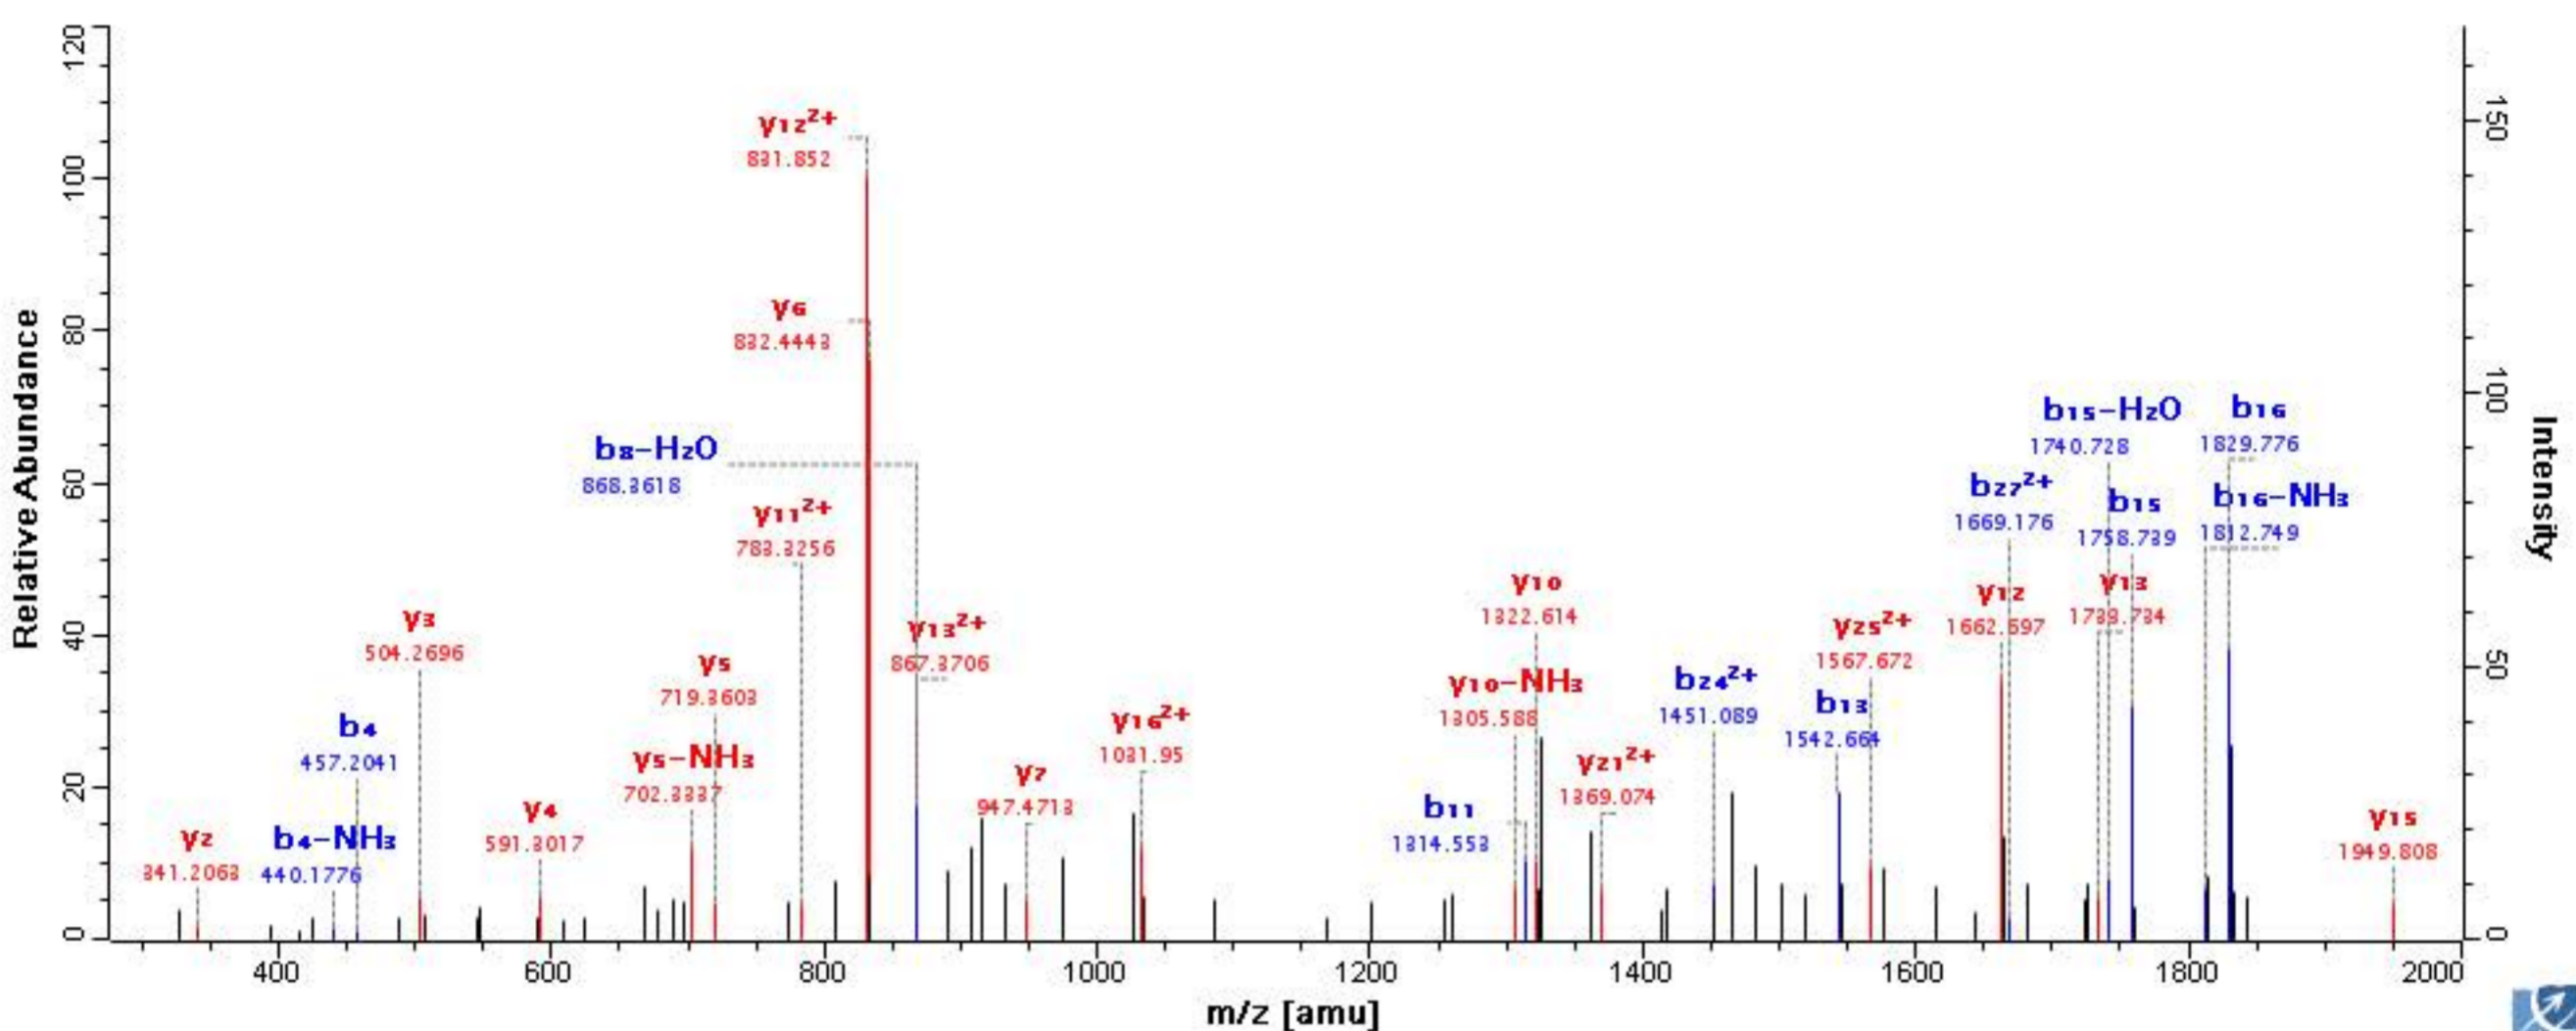

#### precursor information

|                   |                     |
|-------------------|---------------------|
| Mass:             | 3490.45836          |
| m/z:              | System.Collections. |
| Charge:           | System.Collections. |
| Retentiontime:    | System.Collections. |
| Score:            | 97.35215            |
| Mass Error [ppm]: | 0.083491            |
| PEP:              | 4.9517E-17          |
| Precursor Type:   | ISO                 |

| b <sup>2+</sup> ion |          | b ion     |          |     | y ion |          | y <sup>2+</sup> ion |           |                    |
|---------------------|----------|-----------|----------|-----|-------|----------|---------------------|-----------|--------------------|
| Δ dalton            | mass     | Δ dalton  | mass     | seq |       | Δ dalton | mass                | Δ dalton  | mass               |
|                     | 115.0502 |           | 115.0502 | 1   | N     | 27       |                     |           |                    |
|                     | 244.0928 |           | 244.0928 | 2   | E     | 26       | 3377.422            |           | 3377.422           |
|                     | 358.1357 |           | 358.1357 | 3   | N     | 25       | 3248.38             |           | 3248.38            |
|                     | 457.2041 | +0.051233 | 457.2041 | 4   | V     | 24       | 3134.337            |           | 1567.672 +0.198642 |
|                     | 544.2362 |           | 544.2362 | 5   | S     | 23       | 3035.268            |           | 3035.268           |
|                     | 658.2791 |           | 658.2791 | 6   | N     | 22       | 2948.236            |           | 2948.236           |
|                     | 755.3319 |           | 755.3319 | 7   | P     | 21       | 2834.194            |           | 2834.194           |
|                     | 886.3723 |           | 886.3723 | 8   | M     | 20       | 2737.141            |           | 1369.074 +0.493608 |
|                     | 1014.431 |           | 1014.431 | 9   | Q     | 19       | 2606.1              |           | 2606.1             |
|                     | 1151.49  |           | 1151.49  | 10  | H     | 18       | 2478.042            |           | 2478.042           |
|                     | 1314.553 | -0.107238 | 1314.553 | 11  | Y     | 17       | 2340.983            |           | 2340.983           |
|                     | 1429.58  |           | 1429.58  | 12  | D     | 16       | 2177.919            |           | 2177.919           |
|                     | 1542.664 | +0.415178 | 1542.664 | 13  | I     | 15       | 2062.893            |           | 1031.95 +0.193171  |
|                     | 1629.696 |           | 1629.696 | 14  | S     | 14       | 1949.808            | +0.334493 | 1949.808           |
|                     | 1758.739 | -0.316792 | 1758.739 | 15  | E     | 13       | 1862.776            |           | 1862.776           |
|                     | 1829.776 | +0.079322 | 1829.776 | 16  | A     | 12       | 1733.734            | +0.221493 | 867.3706 +0.15496  |
|                     | 1926.829 |           | 1926.829 | 17  | P     | 11       | 1662.697            | +0.055848 | 831.852 +0.011896  |
|                     | 2169.858 |           | 2169.858 | 18  | Y     | 10       | 1565.644            |           | 783.3256 -0.172416 |
|                     | 2332.922 |           | 2332.922 | 19  | Y     | 9        | 1322.614            | -0.310826 | 1322.614           |
|                     | 2429.974 |           | 2429.974 | 20  | P     | 8        | 1159.551            |           | 1159.551           |
|                     | 2545.001 |           | 2545.001 | 21  | D     | 7        | 1062.498            |           | 1062.498           |
|                     | 2660.028 |           | 2660.028 | 22  | D     | 6        | 947.4713            | +0.083918 | 947.4713           |
|                     | 2773.112 |           | 2773.112 | 23  | I     | 5        | 832.4443            | +0.095969 | 832.4443           |
| +0.064942           | 1451.089 |           | 2901.171 | 24  | Q     | 4        | 719.3603            | +0.133951 | 719.3603           |
|                     | 2988.203 |           | 2988.203 | 25  | S     | 3        | 591.3017            | +0.29696  | 591.3017           |
|                     | 3151.266 |           | 3151.266 | 26  | Y     | 2        | 504.2696            | +0.019906 | 504.2696           |
| +0.348823           | 1669.176 |           | 3337.346 | 27  | W     | 1        | 341.2063            | -0.033495 | 341.2063           |
|                     |          |           |          | 28  | K     | 0        | 155.127             |           | 155.127            |

#### general information

|                       |             |
|-----------------------|-------------|
| Annotation:           | 17 of 28    |
| AminoAcids Coverage:  | 61 %        |
| Intensity Coverage:   | 55 %        |
| Protein Localisation: | 167 ... 194 |

Source: 201205213\_VR\_Bsu\_TripleSILACrep1\_pL2ESLS\_F01  
 Scannumber: 13090  
 Protein: BSU16810; ymfC  
 Peptide Score: 99.93  
 Method: ITMS; CID; 3

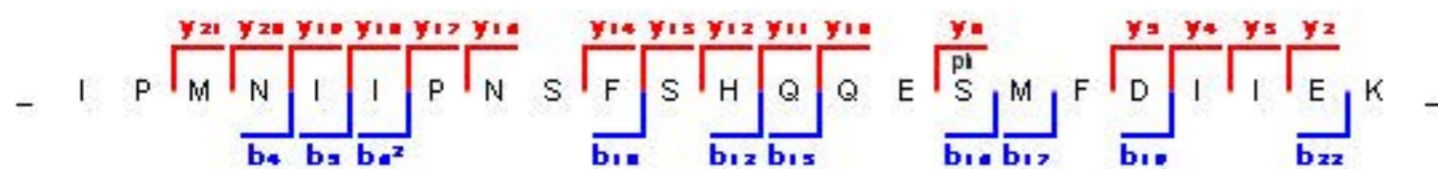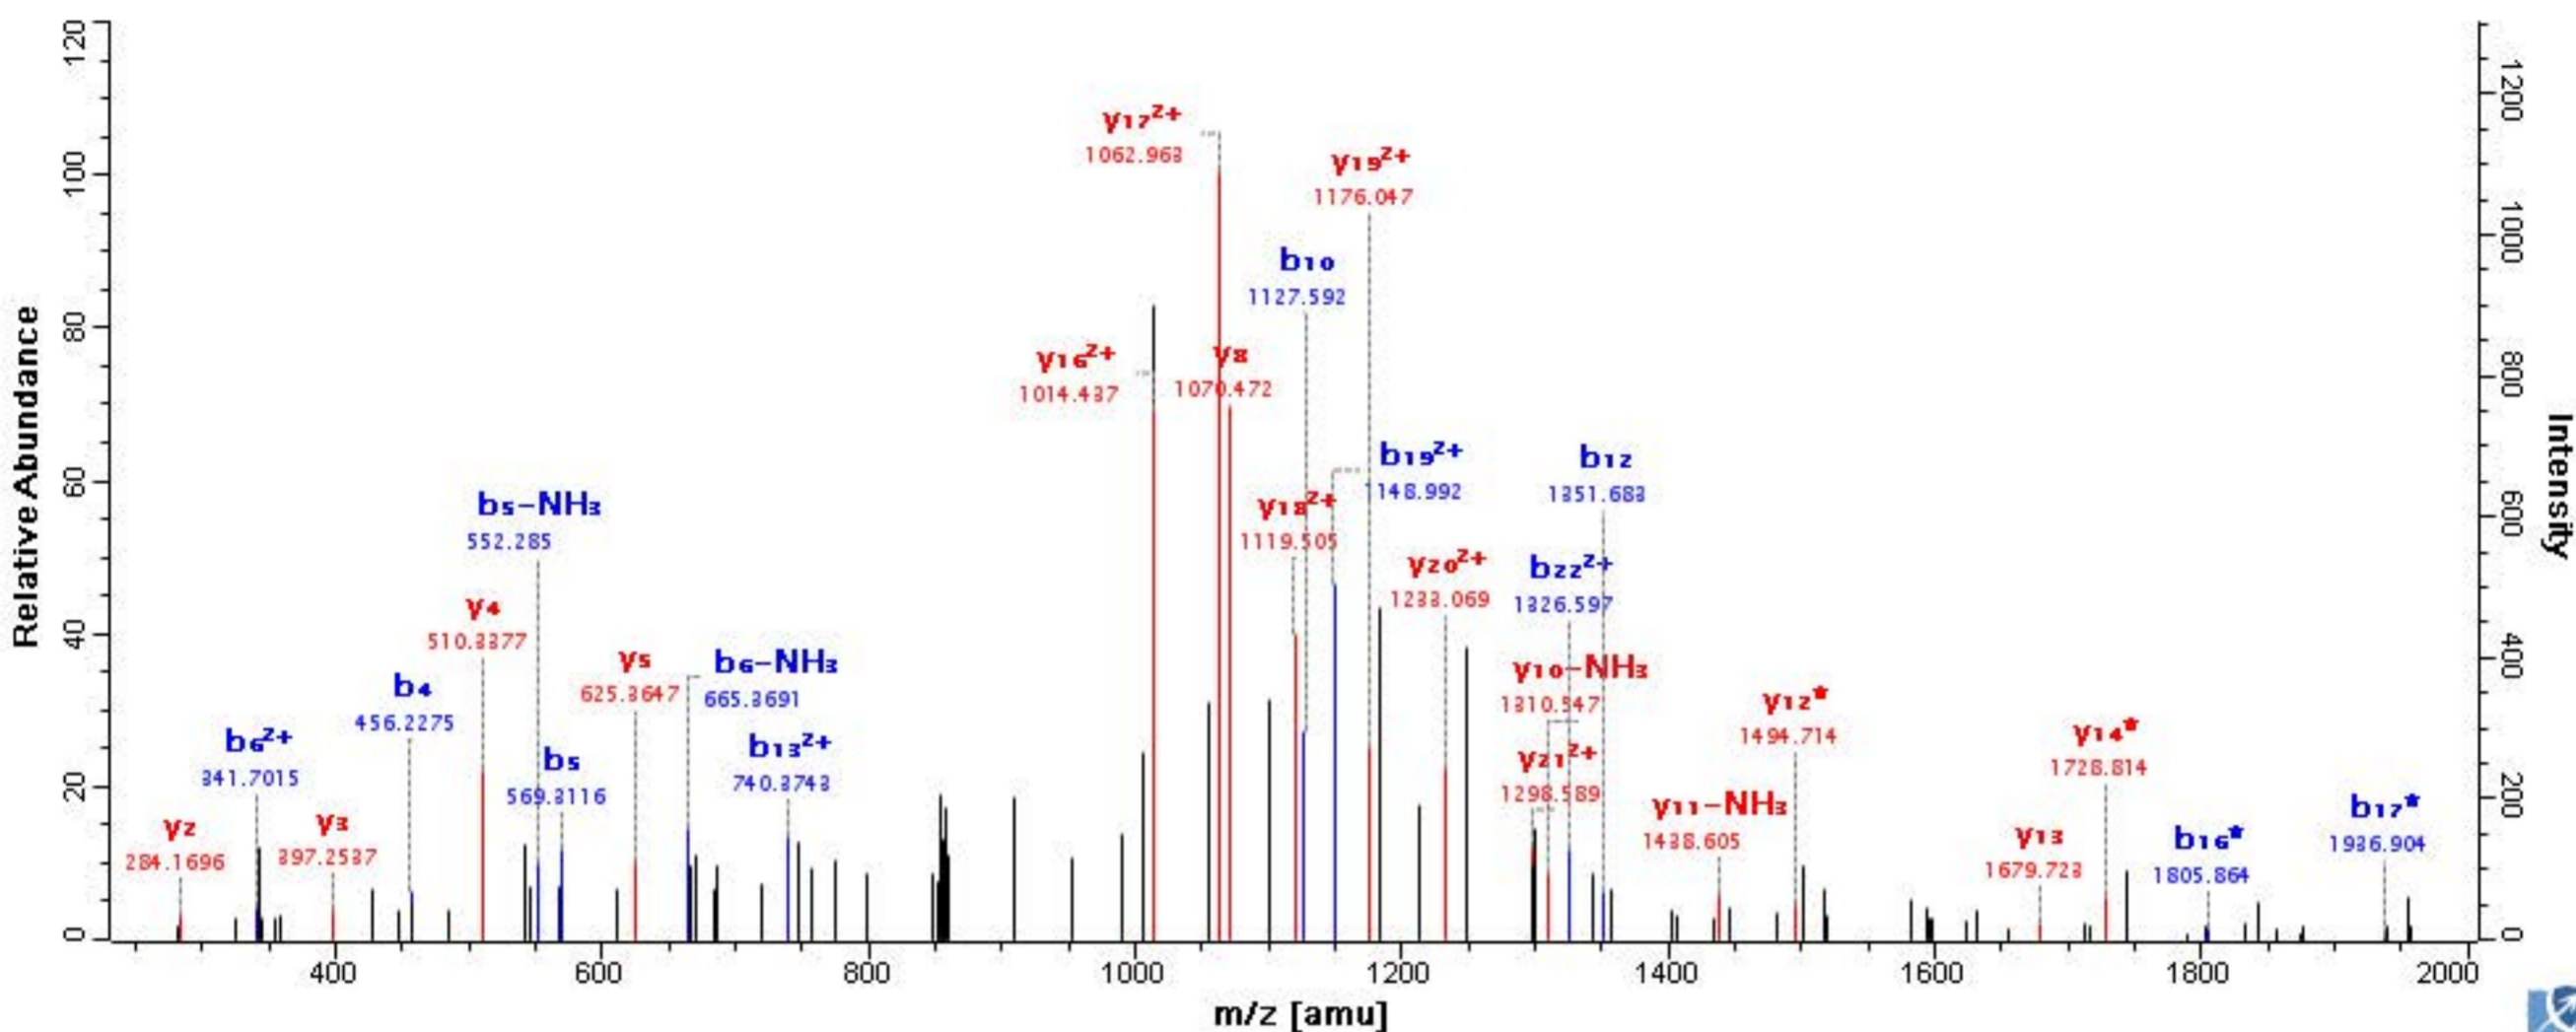

**precursor information**

|                   |                     |
|-------------------|---------------------|
| Mass:             | 2805.30057          |
| m/z:              | System.Collections. |
| Charge:           | System.Collections. |
| Retentiontime:    | System.Collections. |
| Score:            | 99.93027            |
| Mass Error [ppm]: | 0.25965             |
| PEP:              | 3.9386E-07          |
| Precursor Type:   | ISO                 |

| b <sup>2+</sup> ion |          | b ion     |          |     |   | y ion    |          | y <sup>2+</sup> ion |          |
|---------------------|----------|-----------|----------|-----|---|----------|----------|---------------------|----------|
| Δ dalton            | mass     | Δ dalton  | mass     | seq |   | Δ dalton | mass     | Δ dalton            | mass     |
|                     | 114.0913 |           | 114.0913 | 1   | I | 22       |          |                     |          |
|                     | 211.1441 |           | 211.1441 | 2   | P | 21       | 2693.223 |                     | 2693.223 |
|                     | 342.1846 |           | 342.1846 | 3   | M | 20       | 2596.17  |                     | 1298.589 |
|                     | 456.2275 | +0.10836  | 456.2275 | 4   | N | 19       | 2465.13  |                     | 1233.069 |
|                     | 569.3116 | -0.013118 | 569.3116 | 5   | I | 18       | 2351.087 |                     | 1176.047 |
| -0.154097           | 341.7015 |           | 682.3956 | 6   | I | 17       | 2238.003 |                     | 1119.505 |
|                     | 779.4484 |           | 779.4484 | 7   | P | 16       | 2124.919 |                     | 1062.963 |
|                     | 893.4913 |           | 893.4913 | 8   | N | 15       | 2027.866 |                     | 1014.437 |
|                     | 980.5234 |           | 980.5234 | 9   | S | 14       | 1913.823 |                     | 1913.823 |
|                     | 1127.592 | -0.304424 | 1127.592 | 10  | F | 13       | 1826.791 |                     | 1826.791 |
|                     | 1214.624 |           | 1214.624 | 11  | S | 12       | 1679.723 | +0.350385           | 1679.723 |
|                     | 1351.683 | +0.125753 | 1351.683 | 12  | H | 11       | 1592.691 |                     | 1592.691 |
| +0.060895           | 740.3743 |           | 1479.741 | 13  | Q | 10       | 1455.632 |                     | 1455.632 |
|                     | 1607.8   |           | 1607.8   | 14  | Q | 9        | 1327.573 |                     | 1327.573 |
|                     | 1736.842 |           | 1736.842 | 15  | E | 8        | 1199.515 |                     | 1199.515 |
|                     | 1903.841 |           | 1903.841 | 16  | S | 7        | 1070.472 | +0.444702           | 1070.472 |
|                     | 2034.881 |           | 2034.881 | 17  | M | 6        | 903.4736 |                     | 903.4736 |
|                     | 2181.95  |           | 2181.95  | 18  | F | 5        | 772.4331 |                     | 772.4331 |
| +0.235812           | 1148.992 |           | 2296.977 | 19  | D | 4        | 625.3647 | +0.033404           | 625.3647 |
|                     | 2410.061 |           | 2410.061 | 20  | I | 3        | 510.3377 | -0.104326           | 510.3377 |
|                     | 2523.145 |           | 2523.145 | 21  | I | 2        | 397.2537 | +0.001284           | 397.2537 |
| +0.071735           | 1326.597 |           | 2652.187 | 22  | E | 1        | 284.1696 | +0.04833            | 284.1696 |
|                     |          |           |          | 23  | K | 0        | 155.127  |                     | 155.127  |

**general information**

|                       |             |
|-----------------------|-------------|
| Annotation:           | 17 of 23    |
| AminoAcids Coverag    | 74%         |
| Intensity Coverage:   | 44%         |
| Protein Localisation: | 149 ... 171 |

Source: 201205213\_VR\_Bsu\_TripleSILACrep1\_pL2ESLS\_F01  
 Scannumber: 4948  
 Protein: BSU35360; hag  
 Peptide Score: 156.57  
 Method: ITMS; CID; 3

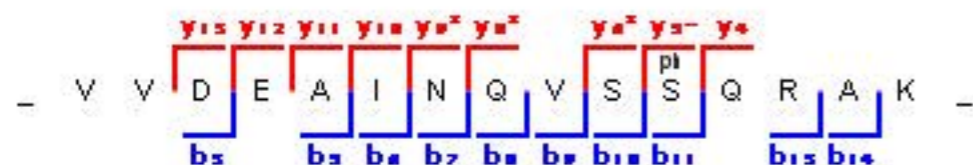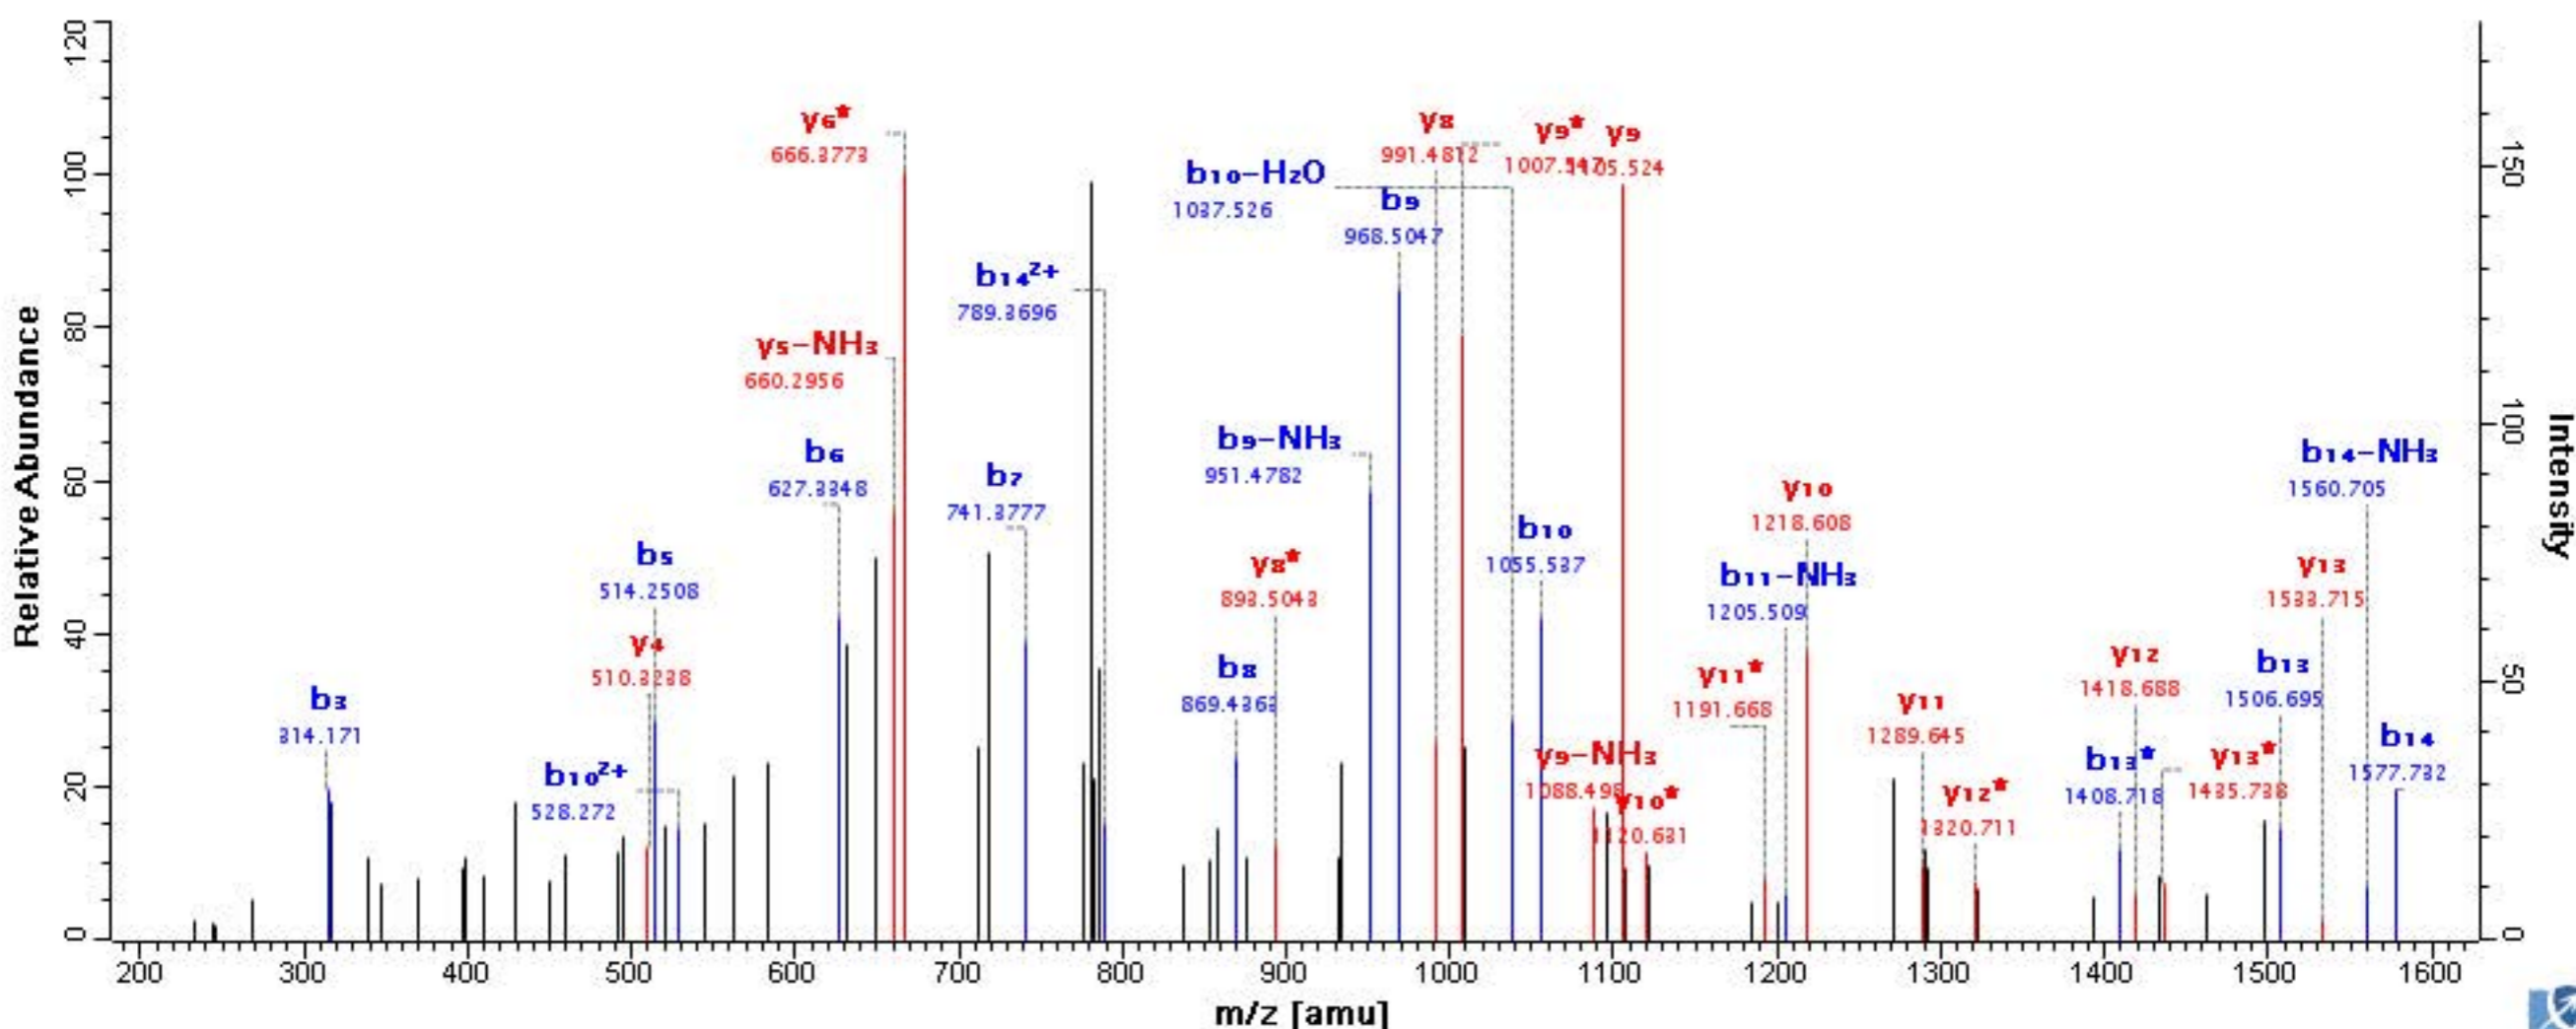

#### precursor information

|                   |                     |
|-------------------|---------------------|
| Mass:             | 1730.84462          |
| m/z:              | System.Collections. |
| Charge:           | System.Collections. |
| Retentiontime:    | System.Collections. |
| Score:            | 156.5722            |
| Mass Error [ppm]: | 0.13932             |
| PEP:              | 9.6413E-17          |
| Precursor Type:   | ISO                 |

| b <sup>2+</sup> ion |              | b ion      |              |    |     |    | γ ion        |            |
|---------------------|--------------|------------|--------------|----|-----|----|--------------|------------|
| Δ dalton            | mass         | Δ dalton   | mass         |    | seq |    | Δ dalton     | mass       |
|                     | 100.07569038 |            | 100.07569038 | 1  | V   | 14 |              |            |
|                     | 199.1441043  |            | 199.1441043  | 2  | V   | 13 | 1632.7832392 |            |
|                     | 314.17104733 | +0.0564002 | 314.17104733 | 3  | D   | 12 | 1533.7148253 | -0.098004  |
|                     | 443.21364043 |            | 443.21364043 | 4  | E   | 11 | 1418.6878823 | +0.1873619 |
|                     | 514.25075422 | +0.0401393 | 514.25075422 | 5  | A   | 10 | 1289.6452892 | -0.0378673 |
|                     | 627.3348182  | +0.0815026 | 627.3348182  | 6  | I   | 9  | 1218.6081754 | -0.1142789 |
|                     | 741.37774564 | -0.2028799 | 741.37774564 | 7  | N   | 8  | 1105.5241114 | -0.0941798 |
|                     | 869.43632315 | +0.013567  | 869.43632315 | 8  | Q   | 7  | 991.48118397 | +0.1821461 |
| -0.1067988          | 528.27202097 | -0.2948221 | 1055.5367655 | 10 | S   | 5  | 764.35419254 |            |
|                     | 1222.5351243 |            | 1222.5351243 | 11 | S   | 4  | 677.32216413 |            |
|                     | 1350.5937018 |            | 1350.5937018 | 12 | Q   | 3  | 510.32380531 | -0.0984025 |
|                     | 1506.6948128 | +0.1898307 | 1506.6948128 | 13 | R   | 2  | 382.2652278  |            |
| -0.3033784          | 789.36960155 | +0.2008126 | 1577.7319266 | 14 | A   | 1  | 226.16411677 |            |
|                     |              |            |              | 15 | K   | 0  | 155.12700298 |            |

#### general information

|                       |             |
|-----------------------|-------------|
| Annotation:           | 12 of 15    |
| AminoAcids Coverag    | 80 %        |
| Intensity Coverage:   | 54 %        |
| Protein Localisation: | 220 ... 234 |

Source: 201205213\_VR\_Bsu\_TripleSILACrep1\_pL2ESLS\_F01  
 Scannumber: 6106  
 Protein: BSU06520; purH; purHJ  
 Peptide Score: 114.99  
 Method: ITMS; CID; 3

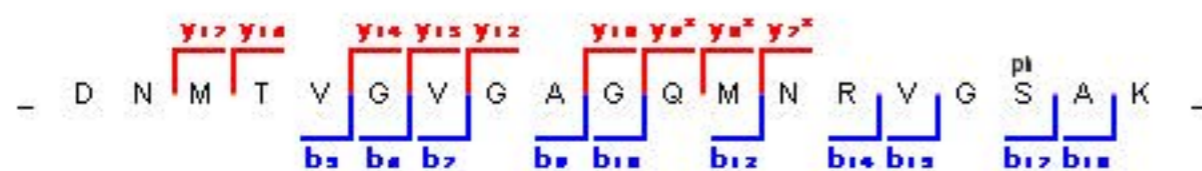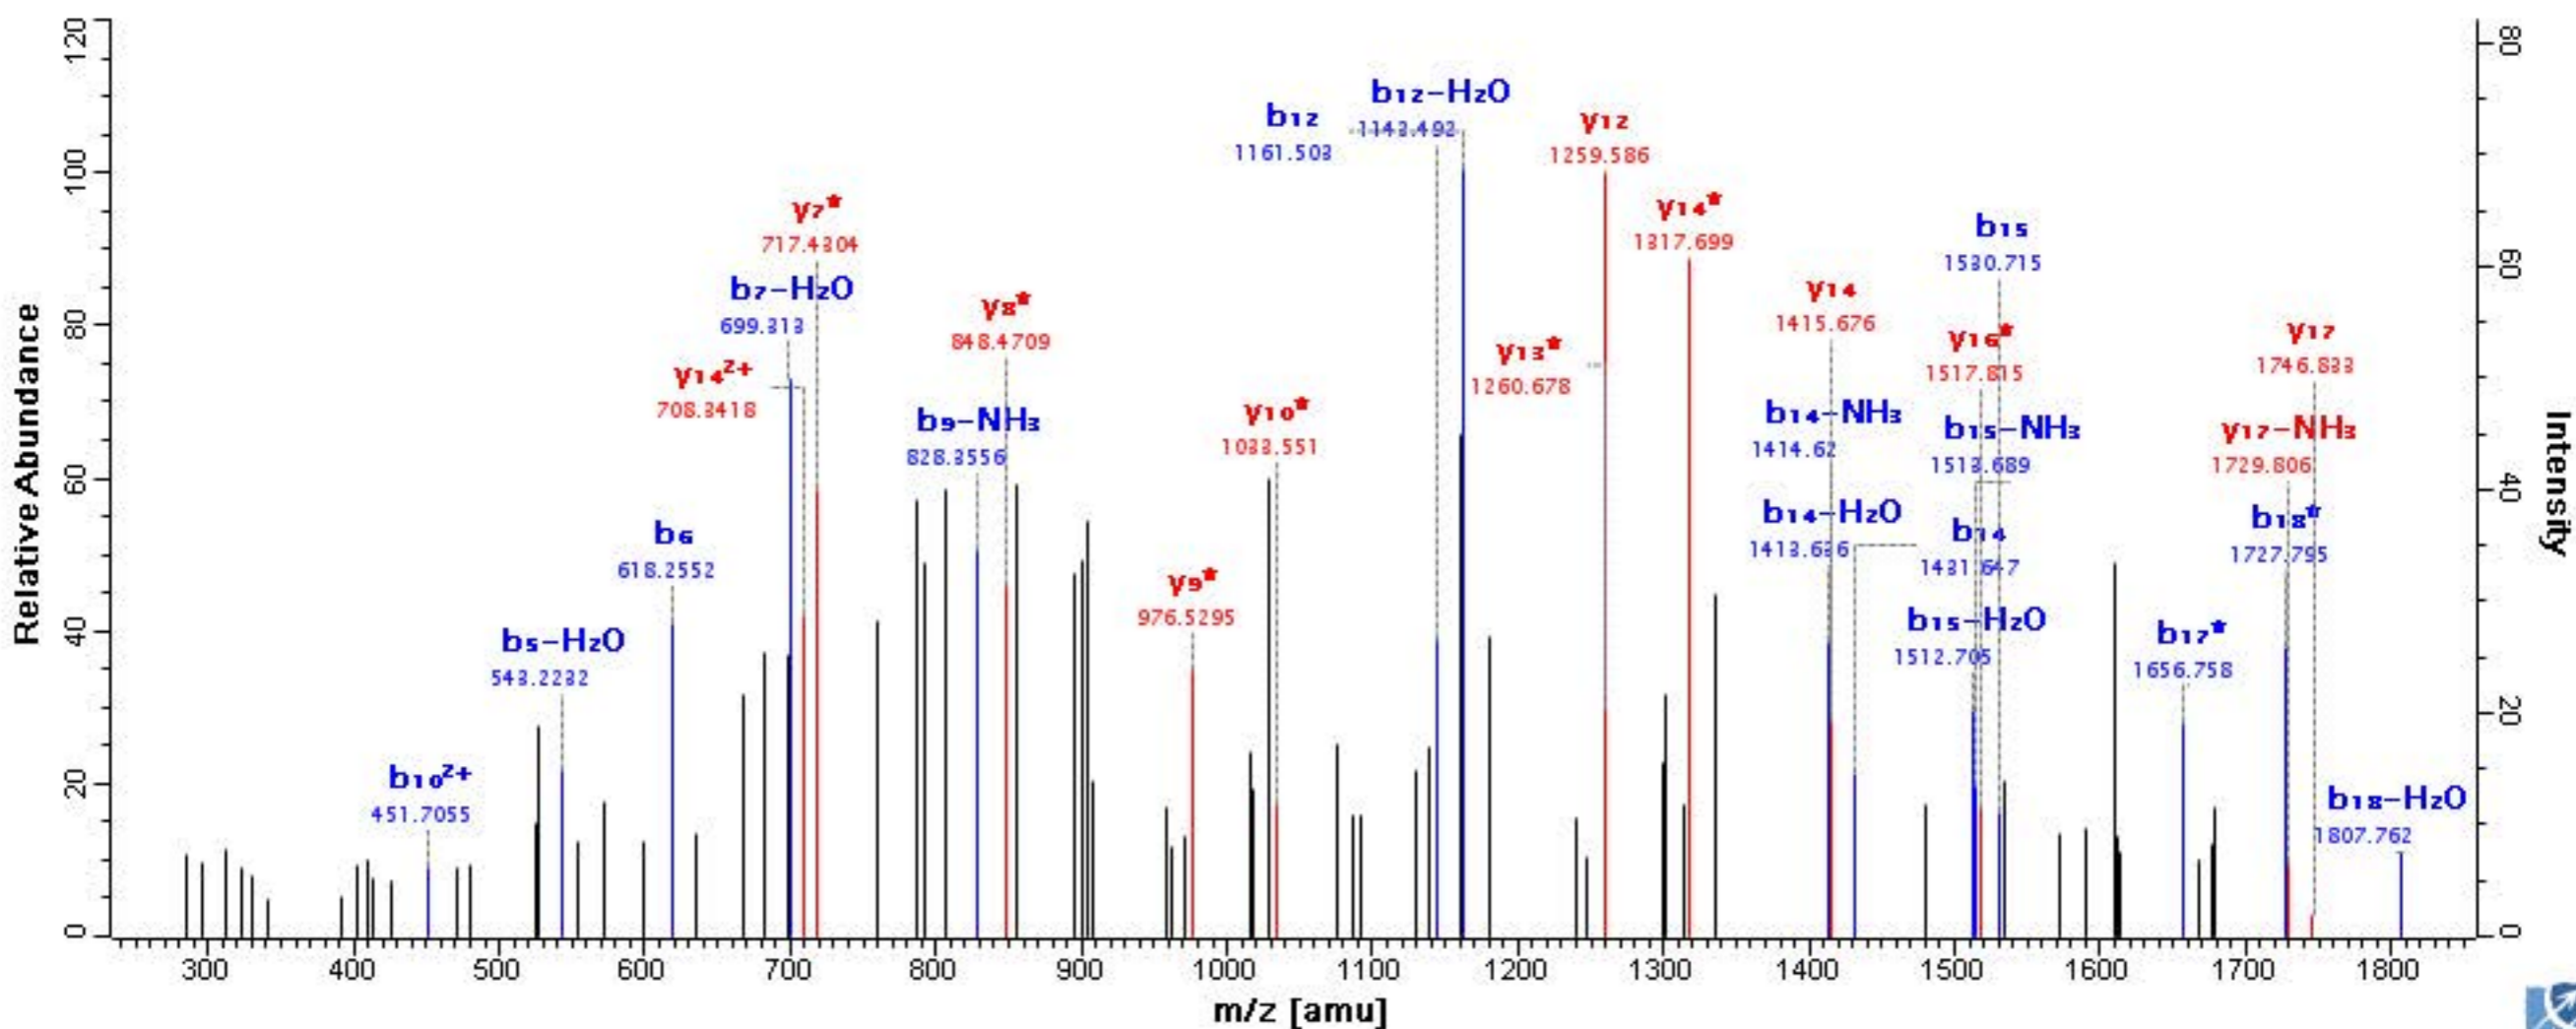

#### precursor information

|                   |                     |
|-------------------|---------------------|
| Mass:             | 1974.89561          |
| m/z:              | System.Collections. |
| Charge:           | System.Collections. |
| Retentiontime:    | System.Collections. |
| Score:            | 114.9863            |
| Mass Error [ppm]: | 0.079259            |
| PEP:              | 0.0035385           |
| Precursor Type:   | ISO                 |

| b <sup>2+</sup> ion |          | b ion     |          | seq |   | y ion    |          | y <sup>2+</sup> ion |          |
|---------------------|----------|-----------|----------|-----|---|----------|----------|---------------------|----------|
| Δ dalton            | mass     | Δ dalton  | mass     |     |   | Δ dalton | mass     | Δ dalton            | mass     |
|                     | 116.0342 |           | 116.0342 | 1   | D | 18       |          |                     |          |
|                     | 230.0771 |           | 230.0771 | 2   | N | 17       | 1860.876 |                     | 1860.876 |
|                     | 361.1176 |           | 361.1176 | 3   | M | 16       | 1746.833 | -0.472384           | 1746.833 |
|                     | 462.1653 |           | 462.1653 | 4   | T | 15       | 1615.792 |                     | 1615.792 |
|                     | 561.2337 |           | 561.2337 | 5   | V | 14       | 1514.745 |                     | 1514.745 |
|                     | 618.2552 | -0.078247 | 618.2552 | 6   | G | 13       | 1415.676 | +0.199574           | 708.3418 |
|                     | 717.3236 |           | 717.3236 | 7   | V | 12       | 1358.655 |                     | 1358.655 |
|                     | 774.3451 |           | 774.3451 | 8   | G | 11       | 1259.586 | -0.156472           | 1259.586 |
|                     | 845.3822 |           | 845.3822 | 9   | A | 10       | 1202.565 |                     | 1202.565 |
| +0.167099           | 451.7055 |           | 902.4036 | 10  | G | 9        | 1131.528 |                     | 1131.528 |
|                     | 1030.462 |           | 1030.462 | 11  | Q | 8        | 1074.506 |                     | 1074.506 |
|                     | 1161.503 | +0.030254 | 1161.503 | 12  | M | 7        | 946.4478 |                     | 946.4478 |
|                     | 1275.546 |           | 1275.546 | 13  | N | 6        | 815.4073 |                     | 815.4073 |
|                     | 1431.647 | +0.148301 | 1431.647 | 14  | R | 5        | 701.3644 |                     | 701.3644 |
|                     | 1530.715 | +0.342338 | 1530.715 | 15  | V | 4        | 545.2633 |                     | 545.2633 |
|                     | 1587.737 |           | 1587.737 | 16  | G | 3        | 446.1948 |                     | 446.1948 |
|                     | 1754.735 |           | 1754.735 | 17  | S | 2        | 389.1734 |                     | 389.1734 |
|                     | 1825.772 |           | 1825.772 | 18  | A | 1        | 222.175  |                     | 222.175  |
|                     |          |           |          | 19  | K | 0        | 151.1379 |                     | 151.1379 |

#### general information

|                       |             |
|-----------------------|-------------|
| Annotation:           | 15 of 19    |
| AminoAcids Coverage:  | 79 %        |
| Intensity Coverage:   | 41 %        |
| Protein Localisation: | 423 ... 441 |

Source: 201205213\_VR\_Bsu\_TripleSILACrep1\_pL2ESLS\_F01  
 Scannumber: 6170  
 Protein: BSU01260; rpIN  
 Peptide Score: 128.95  
 Method: ITMS; CID; 3

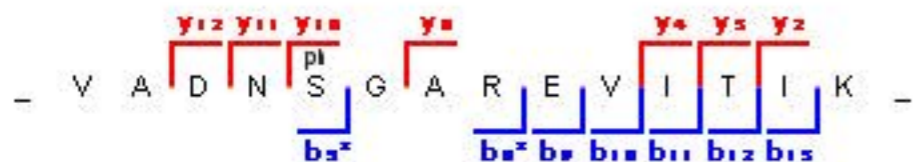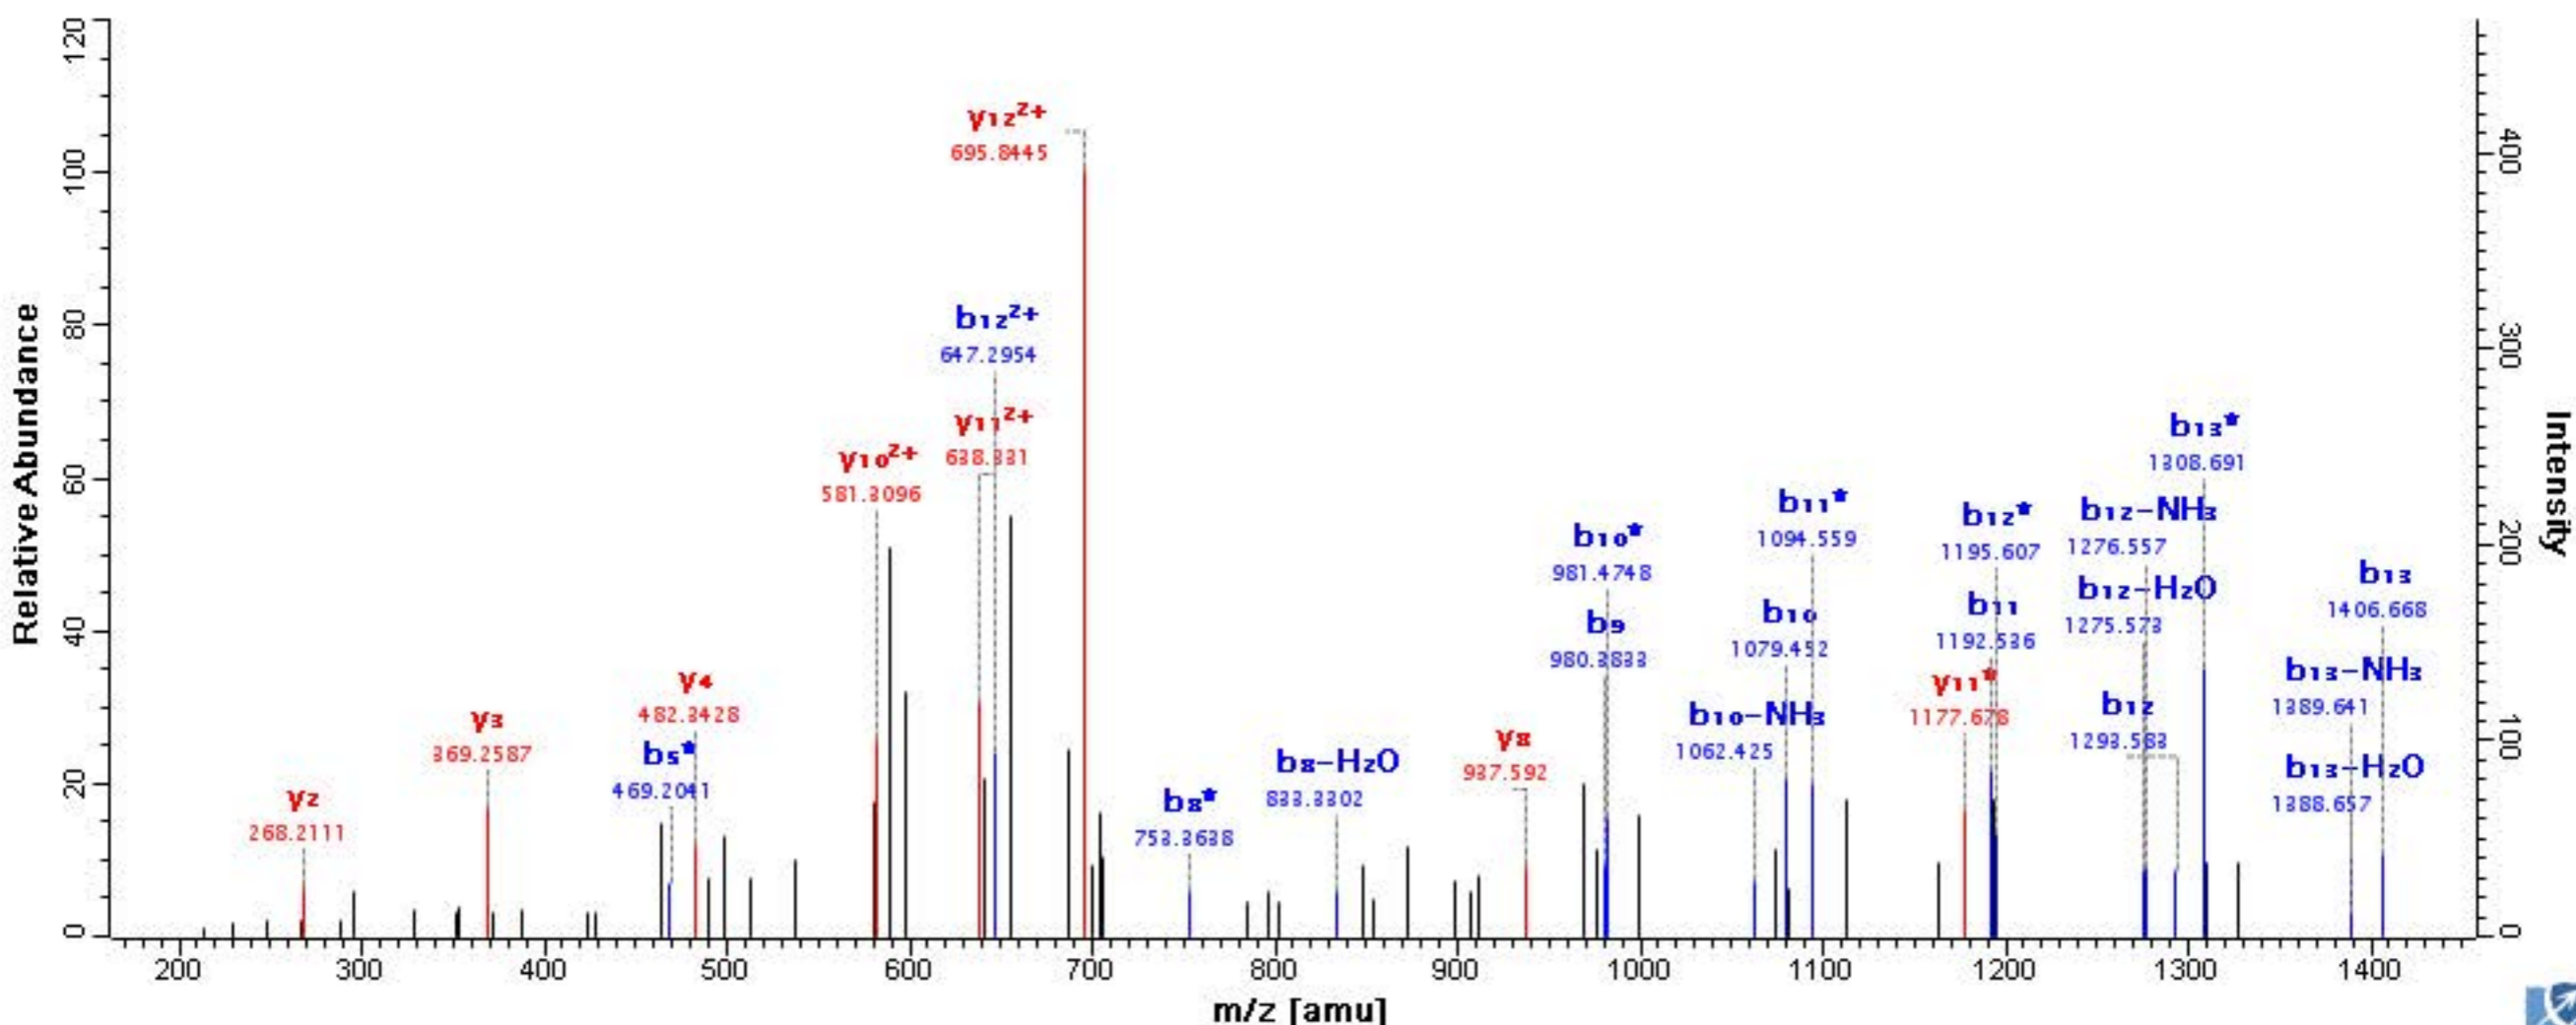

**precursor information**

|                   |                     |
|-------------------|---------------------|
| Mass:             | 1551.76544          |
| m/z:              | System.Collections. |
| Charge:           | System.Collections. |
| Retentiontime:    | System.Collections. |
| Score:            | 128.9506            |
| Mass Error [ppm]: | -0.22463            |
| PEP:              | 1.3836E-06          |
| Precursor Type:   | MULTI               |

**general information**

|                       |           |
|-----------------------|-----------|
| Annotation:           | 10 of 14  |
| AminoAcids Coverag    | 71 %      |
| Intensity Coverage:   | 45 %      |
| Protein Localisation: | 10 ... 23 |

| b <sup>2+</sup> ion |          | b ion     |          | seq |   |    | γ ion    |           | γ <sup>2+</sup> ion |           |
|---------------------|----------|-----------|----------|-----|---|----|----------|-----------|---------------------|-----------|
| Δ dalton            | mass     | Δ dalton  | mass     |     |   |    | Δ dalton | mass      | Δ dalton            | mass      |
|                     | 100.0757 |           | 100.0757 | 1   | V | 13 |          |           |                     |           |
|                     | 171.1128 |           | 171.1128 | 2   | A | 12 | 1461.719 |           | 1461.719            |           |
|                     | 286.1397 |           | 286.1397 | 3   | D | 11 | 1390.682 |           | 695.8445            | +0.405983 |
|                     | 400.1827 |           | 400.1827 | 4   | N | 10 | 1275.655 |           | 638.331             | -0.031962 |
|                     | 567.181  |           | 567.181  | 5   | S | 9  | 1161.612 |           | 581.3096            | +0.028137 |
|                     | 624.2025 |           | 624.2025 | 6   | G | 8  | 994.6135 |           | 994.6135            |           |
|                     | 695.2396 |           | 695.2396 | 7   | A | 7  | 937.592  | -0.044739 | 937.592             |           |
|                     | 851.3407 |           | 851.3407 | 8   | R | 6  | 866.5549 |           | 866.5549            |           |
|                     | 980.3833 | -0.013869 | 980.3833 | 9   | E | 5  | 710.4538 |           | 710.4538            |           |
|                     | 1079.452 | +0.107963 | 1079.452 | 10  | V | 4  | 581.4112 |           | 581.4112            |           |
|                     | 1192.536 | +0.026951 | 1192.536 | 11  | I | 3  | 482.3428 | +0.22317  | 482.3428            |           |
| -0.192774           | 647.2954 | -0.342138 | 1293.583 | 12  | T | 2  | 369.2587 | +0.044416 | 369.2587            |           |
|                     | 1406.668 | +0.159735 | 1406.668 | 13  | I | 1  | 268.2111 | -0.049446 | 268.2111            |           |
|                     |          |           |          | 14  | K | 0  | 155.127  |           | 155.127             |           |

Source: 201205213\_VR\_Bsu\_TripleSILACrep1\_pL2E5LS\_F01  
 Scannumber: 6256  
 Protein: BSU39050; katB; katE; N15D  
 Peptide Score: 62.68  
 Method: ITMS; CID; 3

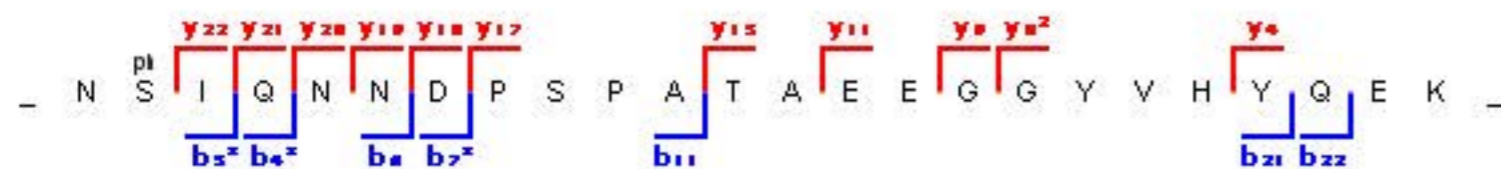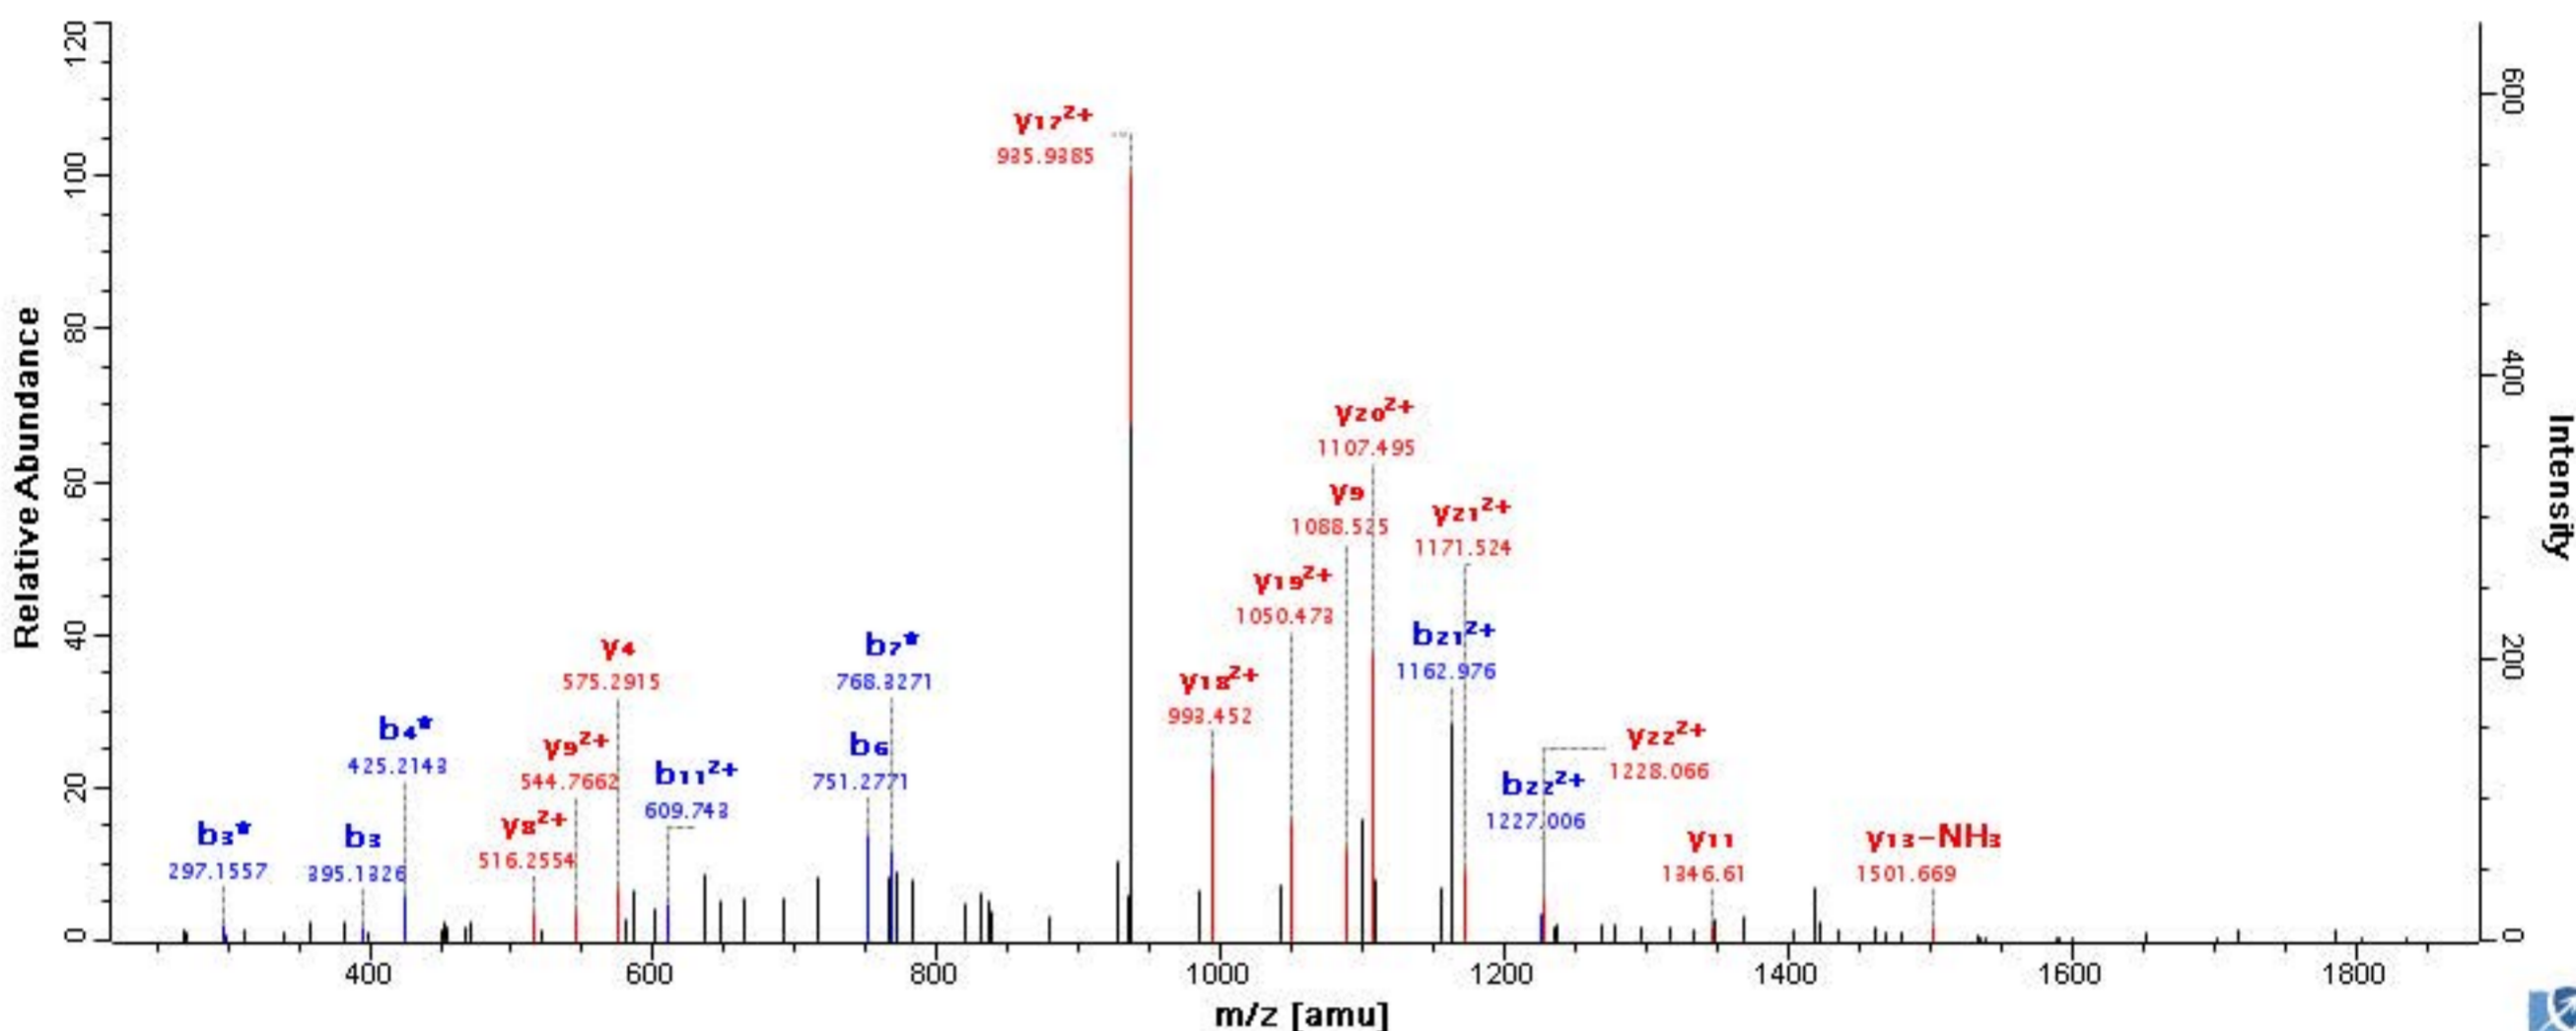

#### precursor information

|                   |                     |
|-------------------|---------------------|
| Mass:             | 2727.14576          |
| m/z:              | System.Collections. |
| Charge:           | System.Collections. |
| Retentiontime:    | System.Collections. |
| Score:            | 62.67707            |
| Mass Error [ppm]: | 0.28356             |
| PEP:              | 0.0049204           |
| Precursor Type:   | MULTI               |

| b <sup>2+</sup> ion |          | b ion     |          |    |     |    | y ion    |           | y <sup>2+</sup> ion |           |
|---------------------|----------|-----------|----------|----|-----|----|----------|-----------|---------------------|-----------|
| Δ dalton            | mass     | Δ dalton  | mass     |    | seq |    | Δ dalton | mass      | Δ dalton            | mass      |
|                     | 115.0502 |           | 115.0502 | 1  | N   | 23 |          |           |                     |           |
|                     | 282.0486 |           | 282.0486 | 2  | S   | 22 | 2622.124 |           | 2622.124            |           |
|                     | 395.1326 | +0.102908 | 395.1326 | 3  | I   | 21 | 2455.125 |           | 1228.066            | +0.19403  |
|                     | 523.1912 |           | 523.1912 | 4  | Q   | 20 | 2342.041 |           | 1171.524            | +0.257058 |
|                     | 637.2341 |           | 637.2341 | 5  | N   | 19 | 2213.983 |           | 1107.495            | +0.218842 |
|                     | 751.2771 | +0.061381 | 751.2771 | 6  | N   | 18 | 2099.94  |           | 1050.473            | +0.01948  |
|                     | 866.304  |           | 866.304  | 7  | D   | 17 | 1985.897 |           | 993.452             | +0.291615 |
|                     | 963.3568 |           | 963.3568 | 8  | P   | 16 | 1870.87  |           | 935.9385            | -0.100064 |
|                     | 1050.389 |           | 1050.389 | 9  | S   | 15 | 1773.817 |           | 1773.817            |           |
|                     | 1147.442 |           | 1147.442 | 10 | P   | 14 | 1686.785 |           | 1686.785            |           |
| -0.224359           | 609.743  |           | 1218.479 | 11 | A   | 13 | 1589.732 |           | 1589.732            |           |
|                     | 1319.526 |           | 1319.526 | 12 | T   | 12 | 1518.695 |           | 1518.695            |           |
|                     | 1390.563 |           | 1390.563 | 13 | A   | 11 | 1417.647 |           | 1417.647            |           |
|                     | 1519.606 |           | 1519.606 | 14 | E   | 10 | 1346.61  | +0.275106 | 1346.61             |           |
|                     | 1648.649 |           | 1648.649 | 15 | E   | 9  | 1217.568 |           | 1217.568            |           |
|                     | 1705.67  |           | 1705.67  | 16 | G   | 8  | 1088.525 | -0.201109 | 544.7662            | +0.099115 |
|                     | 1762.692 |           | 1762.692 | 17 | G   | 7  | 1031.504 |           | 516.2554            | +0.165999 |
|                     | 1925.755 |           | 1925.755 | 18 | Y   | 6  | 974.4822 |           | 974.4822            |           |
|                     | 2024.823 |           | 2024.823 | 19 | V   | 5  | 811.4188 |           | 811.4188            |           |
|                     | 2161.882 |           | 2161.882 | 20 | H   | 4  | 712.3504 |           | 712.3504            |           |
| -0.224466           | 1162.976 |           | 2324.946 | 21 | Y   | 3  | 575.2915 | +0.116457 | 575.2915            |           |
| -0.42038            | 1227.006 |           | 2453.004 | 22 | Q   | 2  | 412.2282 |           | 412.2282            |           |
|                     | 2582.047 |           | 2582.047 | 23 | E   | 1  | 284.1696 |           | 284.1696            |           |
|                     |          |           |          | 24 | K   | 0  | 155.127  |           | 155.127             |           |

#### general information

|                       |             |
|-----------------------|-------------|
| Annotation:           | 15 of 24    |
| AminoAcids Coverage:  | 62 %        |
| Intensity Coverage:   | 47 %        |
| Protein Localisation: | 413 ... 436 |

Source: 201205213\_VR\_Bsu\_TripleSILACrep1\_pL2ESLS\_F01  
 Scannumber: 8174  
 Protein: BSU32250; thrC  
 Peptide Score: 68.19  
 Method: ITMS; CID; 3

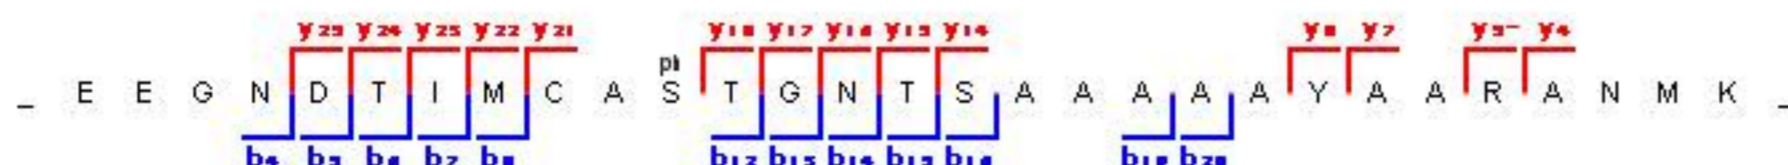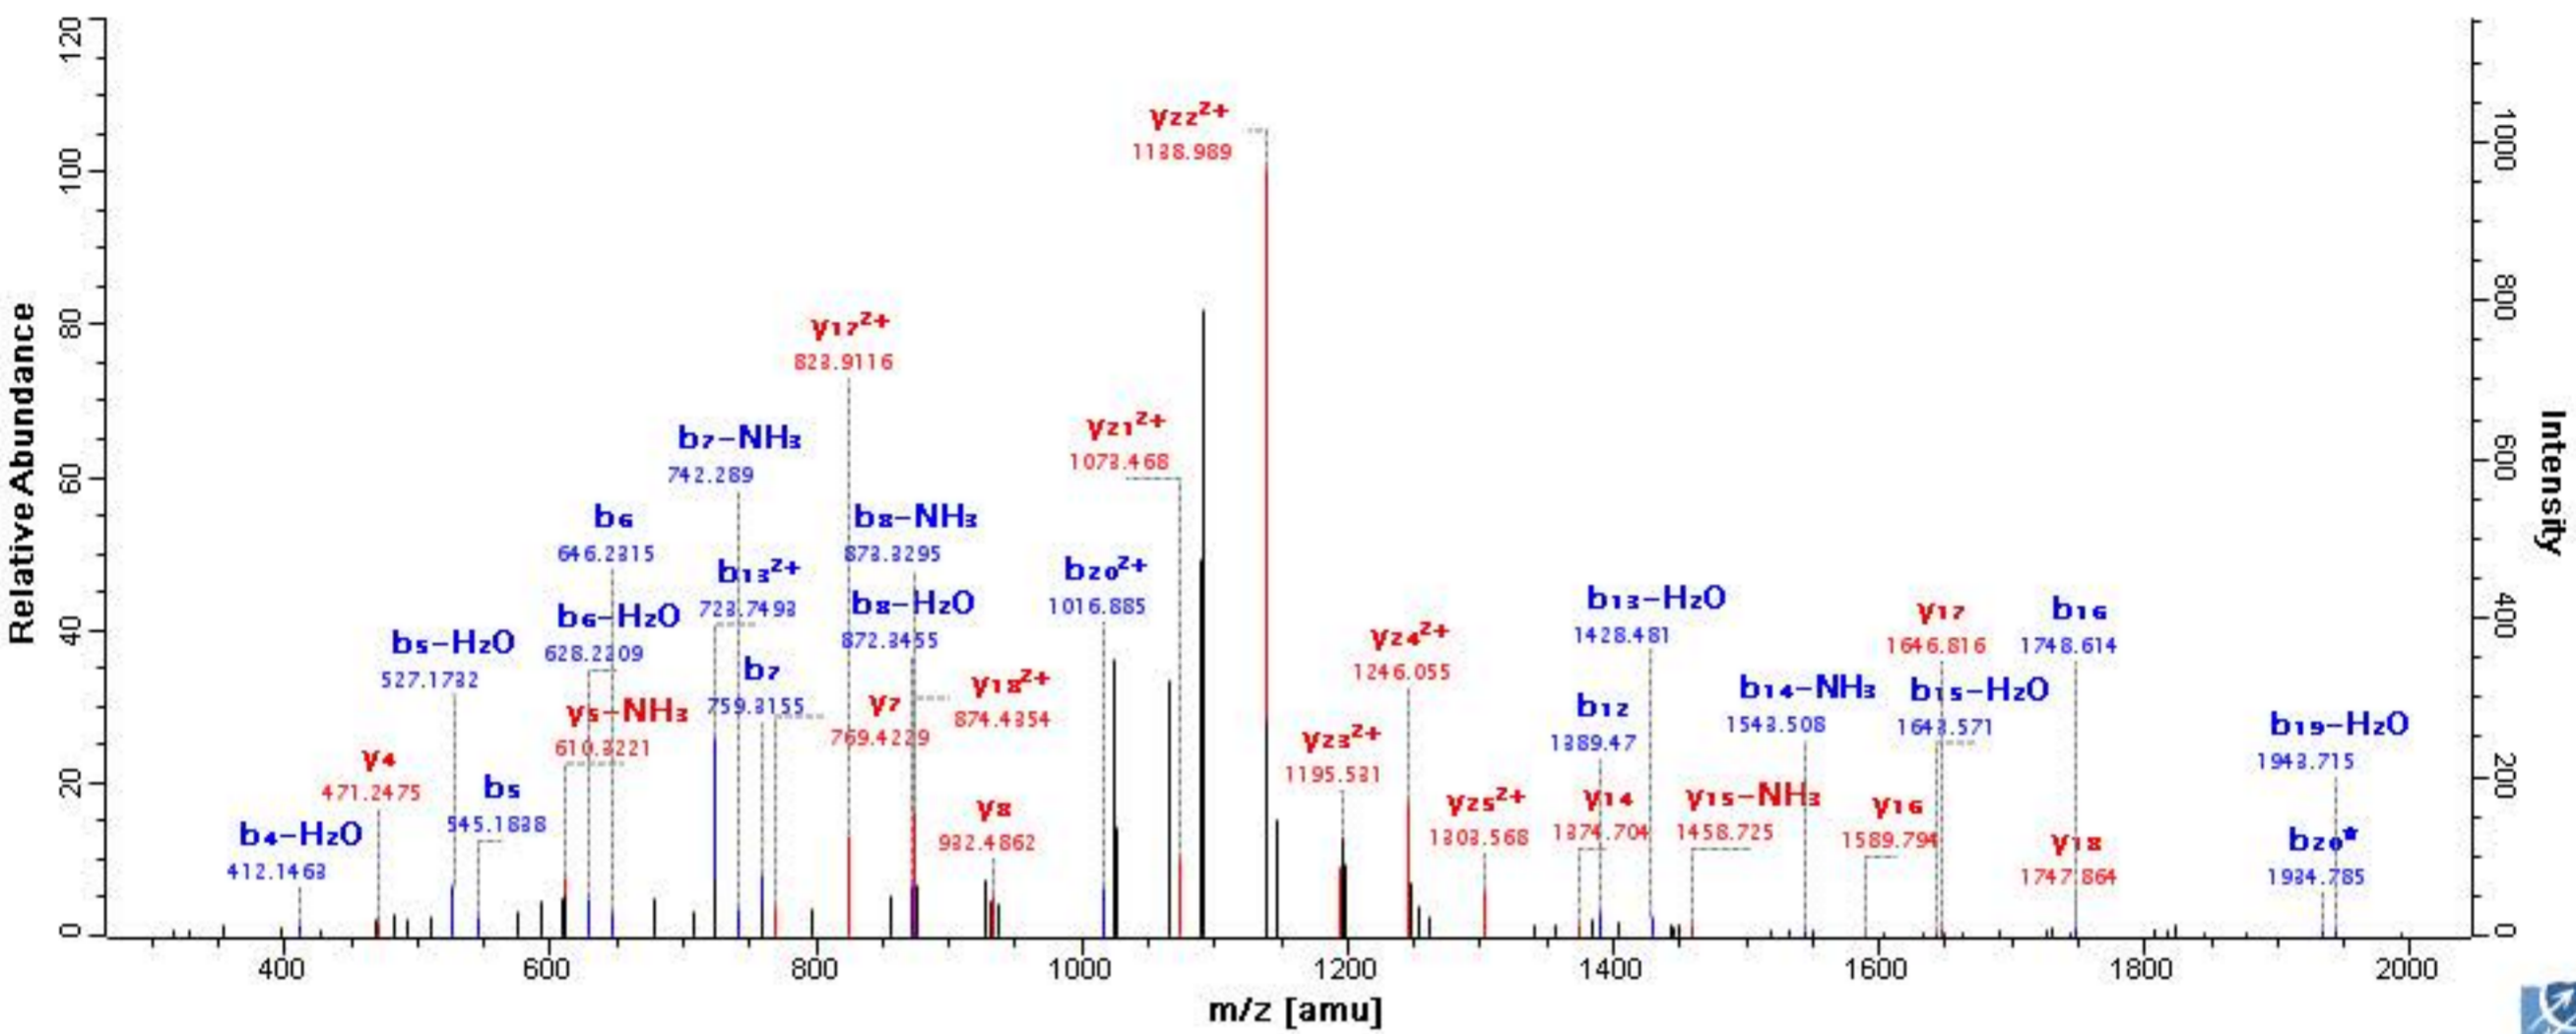

**precursor information**

|                   |                     |
|-------------------|---------------------|
| Mass:             | 3034.26931          |
| m/z:              | System.Collections. |
| Charge:           | System.Collections. |
| Retentiontime:    | System.Collections. |
| Score:            | 68.19204            |
| Mass Error [ppm]: | -0.60064            |
| PEP:              | 7.9395E-06          |
| Precursor Type:   | ISO                 |

| b <sup>2+</sup> ion |          | b ion     |          |     |   | y ion    |          | y <sup>2+</sup> ion |                    |
|---------------------|----------|-----------|----------|-----|---|----------|----------|---------------------|--------------------|
| Δ dalton            | mass     | Δ dalton  | mass     | seq |   | Δ dalton | mass     | Δ dalton            | mass               |
|                     | 130.0499 |           | 130.0499 | 1   | E | 28       |          |                     |                    |
|                     | 259.0925 |           | 259.0925 | 2   | E | 27       | 2906.236 |                     | 2906.236           |
|                     | 316.1139 |           | 316.1139 | 3   | G | 26       | 2777.193 |                     | 2777.193           |
|                     | 430.1569 |           | 430.1569 | 4   | N | 25       | 2720.172 |                     | 2720.172           |
|                     | 545.1838 | -0.08077  | 545.1838 | 5   | D | 24       | 2606.129 |                     | 1303.568 +0.427307 |
|                     | 646.2315 | -0.025299 | 646.2315 | 6   | T | 23       | 2491.102 |                     | 1246.055 +0.030256 |
|                     | 759.3155 | +0.258679 | 759.3155 | 7   | I | 22       | 2390.054 |                     | 1195.531 -0.279523 |
|                     | 890.356  |           | 890.356  | 8   | M | 21       | 2276.97  |                     | 1138.989 +0.199765 |
|                     | 1050.387 |           | 1050.387 | 9   | C | 20       | 2145.93  |                     | 1073.468 +0.072912 |
|                     | 1121.424 |           | 1121.424 | 10  | A | 19       | 1985.899 |                     | 1985.899           |
|                     | 1288.422 |           | 1288.422 | 11  | S | 18       | 1914.862 |                     | 1914.862           |
|                     | 1389.47  | +0.126002 | 1389.47  | 12  | T | 17       | 1747.864 | +0.289413           | 874.4354 -0.069442 |
| -0.44728            | 723.7493 |           | 1446.491 | 13  | G | 16       | 1646.816 | +0.219904           | 823.9116 +0.461965 |
|                     | 1560.534 |           | 1560.534 | 14  | N | 15       | 1589.794 | +0.268955           | 1589.794           |
|                     | 1661.582 |           | 1661.582 | 15  | T | 14       | 1475.751 |                     | 1475.751           |
|                     | 1748.614 | +0.26706  | 1748.614 | 16  | S | 13       | 1374.704 | -0.282651           | 1374.704           |
|                     | 1819.651 |           | 1819.651 | 17  | A | 12       | 1287.672 |                     | 1287.672           |
|                     | 1890.688 |           | 1890.688 | 18  | A | 11       | 1216.635 |                     | 1216.635           |
|                     | 1961.725 |           | 1961.725 | 19  | A | 10       | 1145.598 |                     | 1145.598           |
| -0.37384            | 1016.885 |           | 2032.762 | 20  | A | 9        | 1074.56  |                     | 1074.56            |
|                     | 2103.799 |           | 2103.799 | 21  | A | 8        | 1003.523 |                     | 1003.523           |
|                     | 2266.863 |           | 2266.863 | 22  | Y | 7        | 932.4862 | +0.188975           | 932.4862           |
|                     | 2337.9   |           | 2337.9   | 23  | A | 6        | 769.4229 | -0.238907           | 769.4229           |
|                     | 2408.937 |           | 2408.937 | 24  | A | 5        | 698.3858 |                     | 698.3858           |
|                     | 2565.038 |           | 2565.038 | 25  | R | 4        | 627.3486 |                     | 627.3486           |
|                     | 2636.075 |           | 2636.075 | 26  | A | 3        | 471.2475 | -0.031342           | 471.2475           |
|                     | 2750.118 |           | 2750.118 | 27  | N | 2        | 400.2104 |                     | 400.2104           |
|                     | 2881.159 |           | 2881.159 | 28  | M | 1        | 286.1675 |                     | 286.1675           |
|                     |          |           |          | 29  | K | 0        | 155.127  |                     | 155.127            |

**general information**

|                       |            |
|-----------------------|------------|
| Annotation:           | 18 of 29   |
| AminoAcids Coverag    | 62 %       |
| Intensity Coverage:   | 40 %       |
| Protein Localisation: | 72 ... 100 |



Source: 201 205213\_VR\_Bsu\_TripleSILACrep1\_pL2ESLS\_F01  
 Scannumber: 9725  
 Protein: BSU03480; srfA; srfA1; srfAA  
 Peptide Score: 77.63  
 Method: ITMS; CID; 3

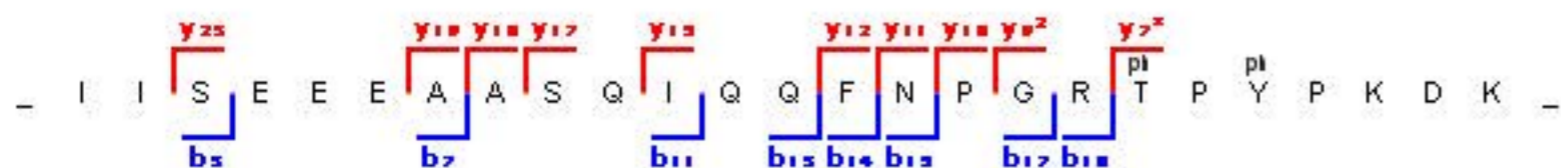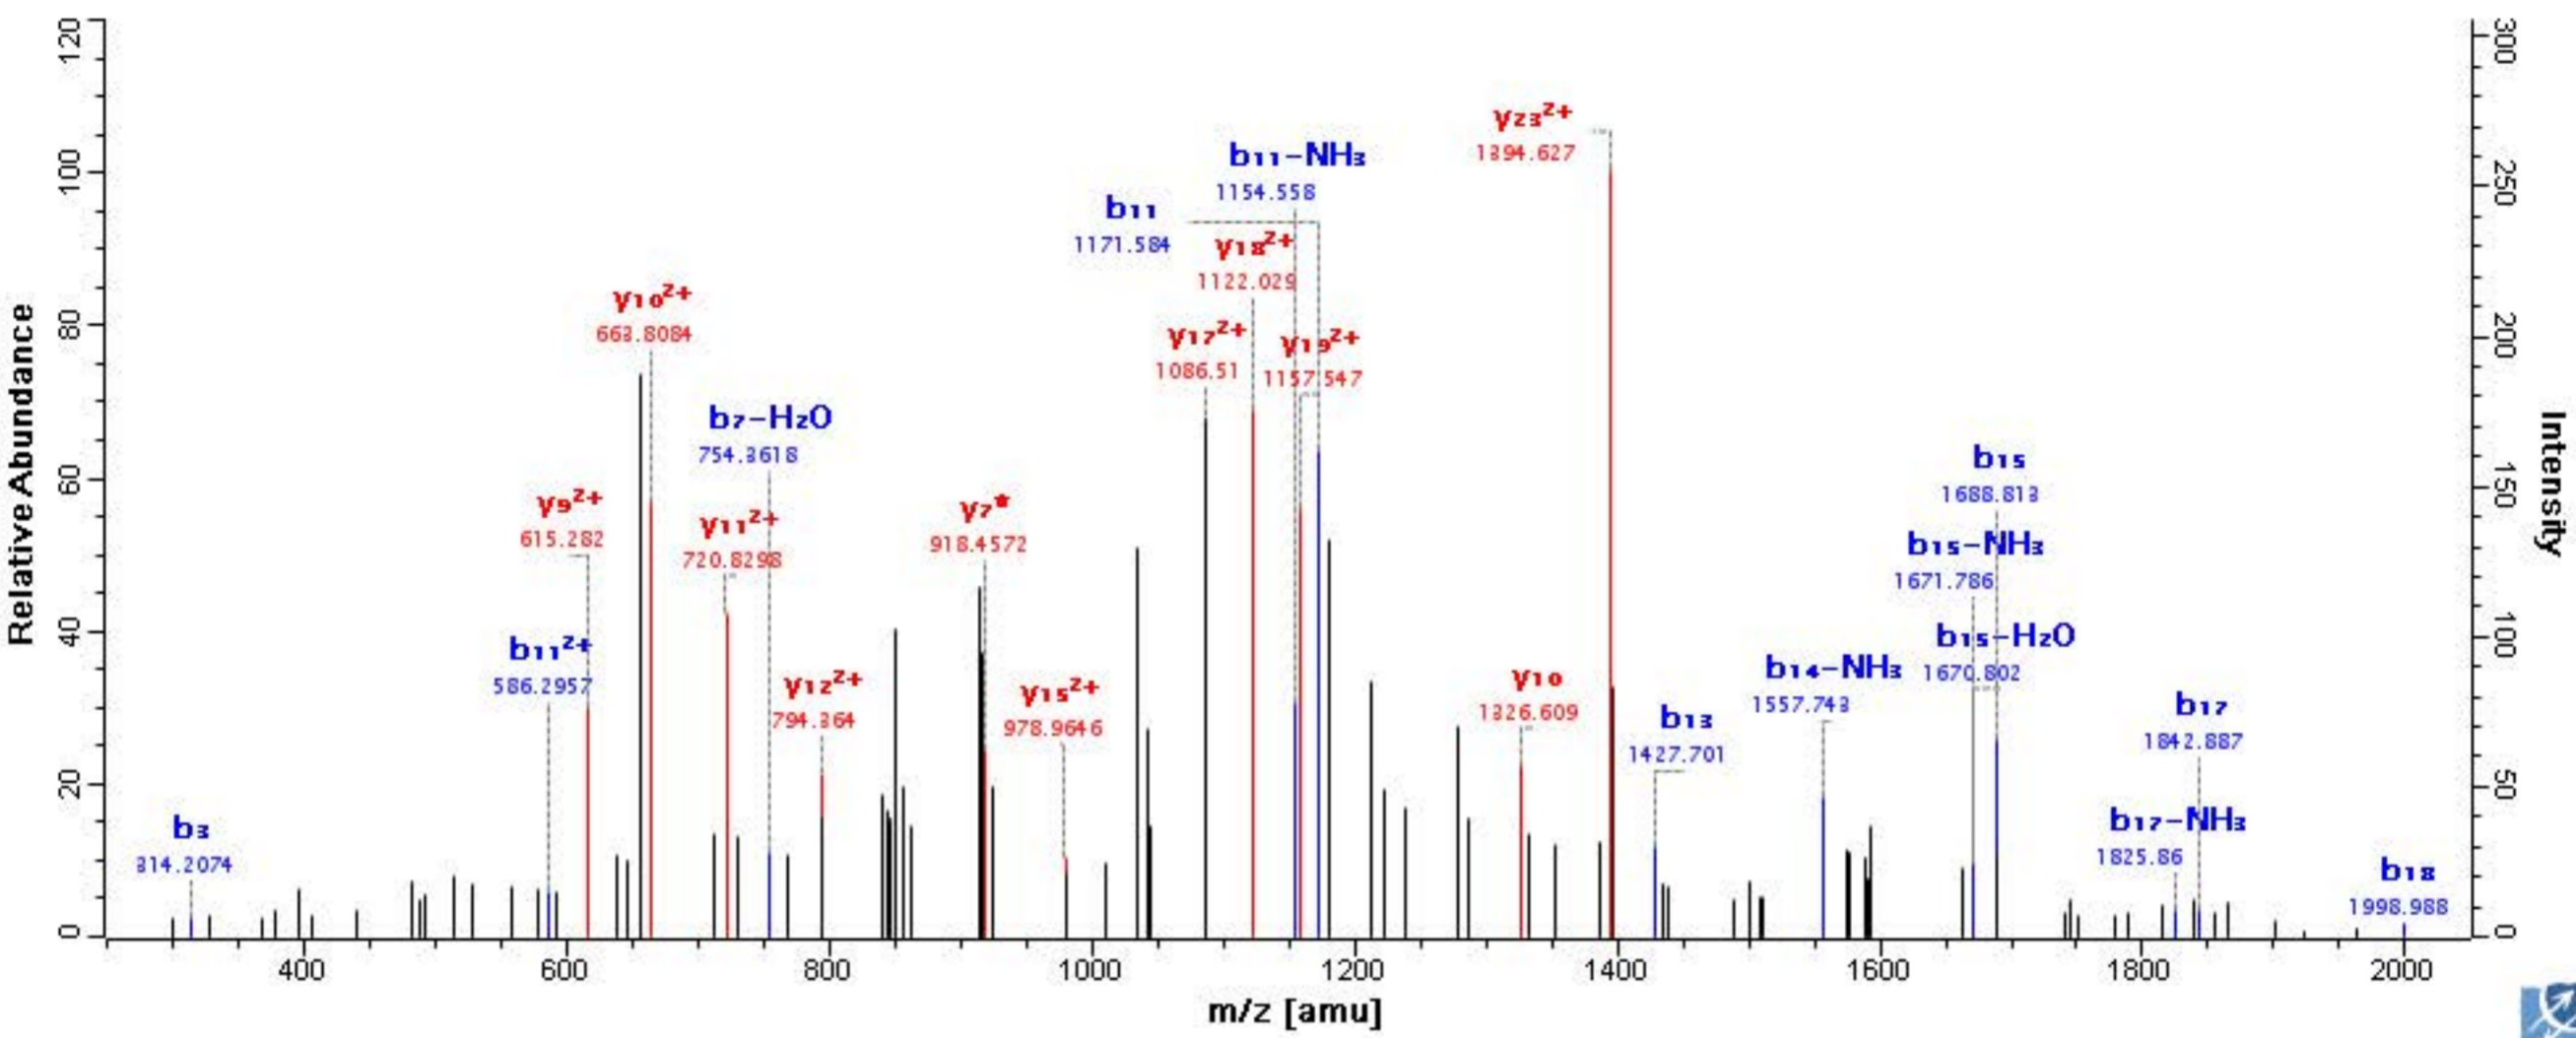

**precursor information**

|                   |                     |
|-------------------|---------------------|
| Mass:             | 3013.40639          |
| m/z:              | System.Collections. |
| Charge:           | System.Collections. |
| Retentiontime:    | System.Collections. |
| Score:            | 77.63057            |
| Mass Error [ppm]: | -0.37283            |
| PEP:              | 0.00069147          |
| Precursor Type:   | ISO                 |

| b <sup>2+</sup> ion |          | b ion     |          |     | y ion |          | y <sup>2+</sup> ion |          |                    |
|---------------------|----------|-----------|----------|-----|-------|----------|---------------------|----------|--------------------|
| Δ dalton            | mass     | Δ dalton  | mass     | seq |       | Δ dalton | mass                | Δ dalton | mass               |
|                     | 114.0913 |           | 114.0913 | 1   | I     | 24       |                     |          |                    |
|                     | 227.1754 |           | 227.1754 | 2   | I     | 23       | 2901.331            |          | 2901.331           |
|                     | 314.2074 | +0.021357 | 314.2074 | 3   | S     | 22       | 2788.247            |          | 1394.627 +0.305405 |
|                     | 443.25   |           | 443.25   | 4   | E     | 21       | 2701.215            |          | 2701.215           |
|                     | 572.2926 |           | 572.2926 | 5   | E     | 20       | 2572.172            |          | 2572.172           |
|                     | 701.3352 |           | 701.3352 | 6   | E     | 19       | 2443.129            |          | 2443.129           |
|                     | 772.3723 |           | 772.3723 | 7   | A     | 18       | 2314.087            |          | 1157.547 +0.237848 |
|                     | 843.4094 |           | 843.4094 | 8   | A     | 17       | 2243.05             |          | 1122.029 +0.335506 |
|                     | 930.4415 |           | 930.4415 | 9   | S     | 16       | 2172.013            |          | 1086.51 -0.07477   |
|                     | 1058.5   |           | 1058.5   | 10  | Q     | 15       | 2084.981            |          | 2084.981           |
| -0.148598           | 586.2957 | +0.281857 | 1171.584 | 11  | I     | 14       | 1956.922            |          | 978.9646 +0.309278 |
|                     | 1299.643 |           | 1299.643 | 12  | Q     | 13       | 1843.838            |          | 1843.838           |
|                     | 1427.701 | +0.243438 | 1427.701 | 13  | Q     | 12       | 1715.779            |          | 1715.779           |
|                     | 1574.77  |           | 1574.77  | 14  | F     | 11       | 1587.721            |          | 794.364 -0.131128  |
|                     | 1688.813 | +0.109147 | 1688.813 | 15  | N     | 10       | 1440.652            |          | 720.8298 +0.157046 |
|                     | 1785.865 |           | 1785.865 | 16  | P     | 9        | 1326.609 -0.176475  |          | 663.8084 +0.307477 |
|                     | 1842.887 | -0.342522 | 1842.887 | 17  | G     | 8        | 1229.557            |          | 615.282 +0.046506  |
|                     | 1998.988 | +0.38144  | 1998.988 | 18  | R     | 7        | 1172.535            |          | 1172.535           |
|                     | 2180.002 |           | 2180.002 | 19  | T     | 6        | 1016.434            |          | 1016.434           |
|                     | 2277.055 |           | 2277.055 | 20  | P     | 5        | 835.4201            |          | 835.4201           |
|                     | 2520.084 |           | 2520.084 | 21  | Y     | 4        | 738.3673            |          | 738.3673           |
|                     | 2617.137 |           | 2617.137 | 22  | P     | 3        | 495.3377            |          | 495.3377           |
|                     | 2749.257 |           | 2749.257 | 23  | K     | 2        | 398.2849            |          | 398.2849           |
|                     | 2864.284 |           | 2864.284 | 24  | D     | 1        | 266.1649            |          | 266.1649           |
|                     |          |           |          | 25  | K     | 0        | 151.1379            |          | 151.1379           |

**general information**

|                       |               |
|-----------------------|---------------|
| Annotation:           | 13 of 25      |
| AminoAcids Coverage:  | 52 %          |
| Intensity Coverage:   | 39 %          |
| Protein Localisation: | 1481 ... 1505 |

Source: 201205213\_VR\_Bsu\_TripleSILACrep1\_pL2ESLS\_F01  
 Scannumber: 9806  
 Protein: BSU37120; fba; fba1; fbaA; tsr  
 Peptide Score: 105.5  
 Method: ITMS; CID; 3

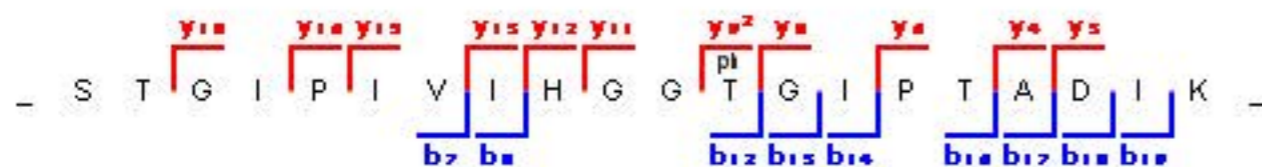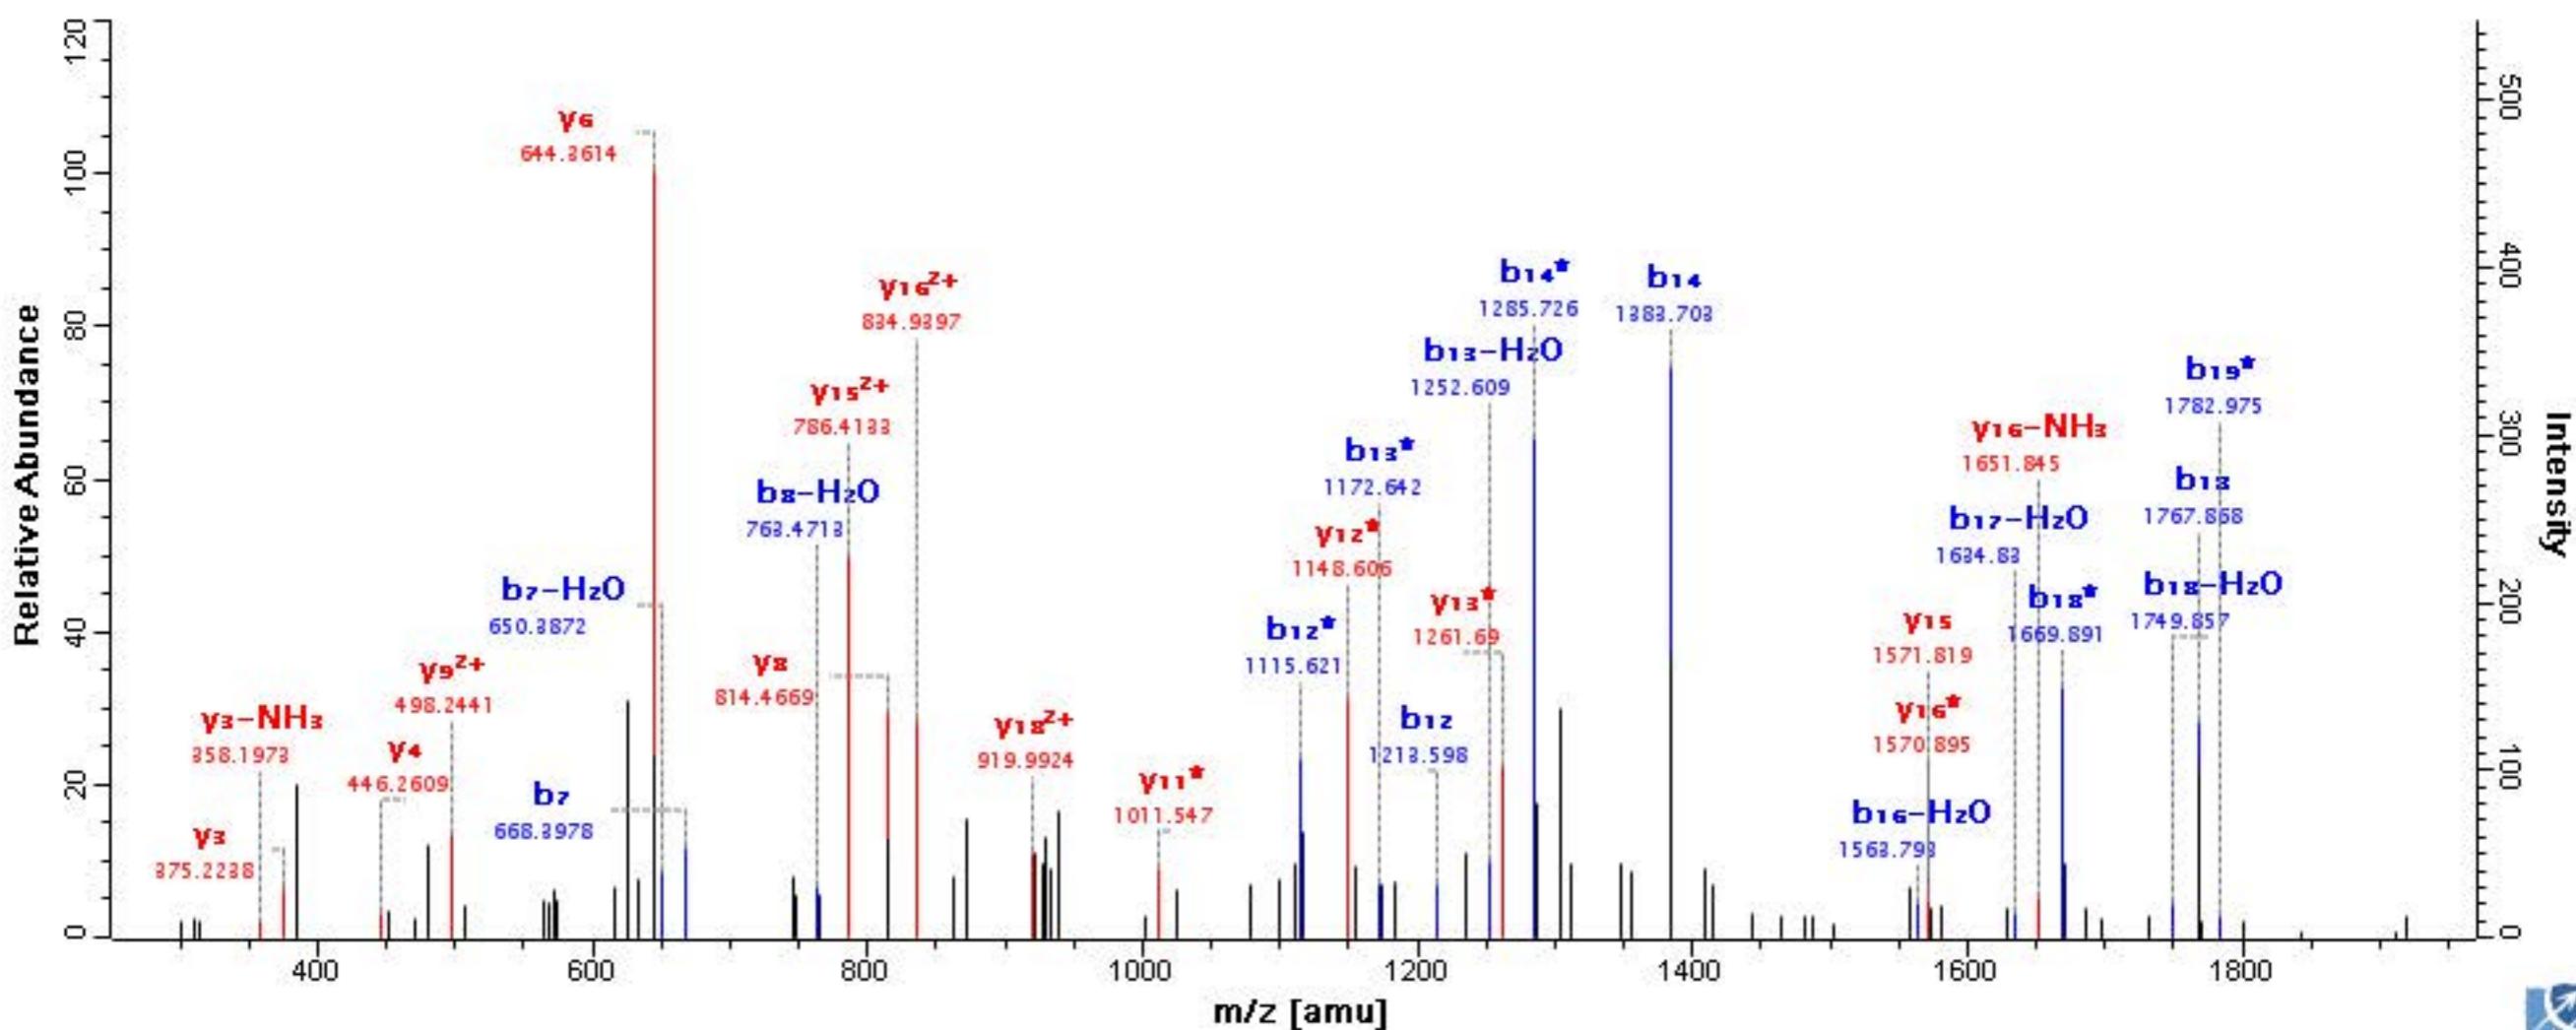

#### precursor information

|                   |                     |
|-------------------|---------------------|
| Mass:             | 2026.0498           |
| m/z:              | System.Collections. |
| Charge:           | System.Collections. |
| Retentiontime:    | System.Collections. |
| Score:            | 105.5022            |
| Mass Error [ppm]: | -0.10192            |
| PEP:              | 1.064E-07           |
| Precursor Type:   | MULTI               |

#### general information

|                       |             |
|-----------------------|-------------|
| Annotation:           | 15 of 20    |
| AminoAcids Coverage:  | 75 %        |
| Intensity Coverage:   | 53 %        |
| Protein Localisation: | 201 ... 220 |

| b ion      |              |    |     |    | y ion        |            | y <sup>2+</sup> ion |            |
|------------|--------------|----|-----|----|--------------|------------|---------------------|------------|
| Δ dalton   | mass         |    | seq |    | Δ dalton     | mass       | Δ dalton            | mass       |
|            | 88.039304876 | 1  | S   | 19 |              |            |                     |            |
|            | 189.08698335 | 2  | T   | 18 | 1940.0252551 |            | 1940.0252551        |            |
|            | 246.10844707 | 3  | G   | 17 | 1838.9775766 |            | 919.99242655        | -0.2499949 |
|            | 359.19251105 | 4  | I   | 16 | 1781.9561129 |            | 1781.9561129        |            |
|            | 456.24527491 | 5  | P   | 15 | 1668.8720489 |            | 834.93966269        | +0.3247416 |
|            | 569.32933889 | 6  | I   | 14 | 1571.8192851 | +0.0778097 | 786.41328077        | -0.3148921 |
| +0.0521984 | 668.3977528  | 7  | V   | 13 | 1458.7352211 |            | 1458.7352211        |            |
|            | 781.48181678 | 8  | I   | 12 | 1359.6668072 |            | 1359.6668072        |            |
|            | 918.54072865 | 9  | H   | 11 | 1246.5827432 |            | 1246.5827432        |            |
|            | 975.56219237 | 10 | G   | 10 | 1109.5238313 |            | 1109.5238313        |            |
|            | 1032.5836561 | 11 | G   | 9  | 1052.5023676 |            | 1052.5023676        |            |
| +0.0165928 | 1213.597665  | 12 | T   | 8  | 995.48090388 |            | 498.24409018        | +0.0803727 |
|            | 1270.6191287 | 13 | G   | 7  | 814.466895   | +0.0321284 | 814.466895          |            |
| +0.0631647 | 1383.7031927 | 14 | I   | 6  | 757.44543128 |            | 757.44543128        |            |
|            | 1480.7559565 | 15 | P   | 5  | 644.3613673  | -0.029336  | 644.3613673         |            |
|            | 1581.803635  | 16 | T   | 4  | 547.30860344 |            | 547.30860344        |            |
|            | 1652.8407488 | 17 | A   | 3  | 446.26092497 | -0.1159665 | 446.26092497        |            |
| -0.2105873 | 1767.8676918 | 18 | D   | 2  | 375.22381118 | +0.163579  | 375.22381118        |            |
|            | 1880.9517558 | 19 | I   | 1  | 260.19686815 |            | 260.19686815        |            |
|            |              | 20 | K   | 0  | 147.11280417 |            | 147.11280417        |            |

Source: 201 205213\_VR\_Bsu\_TripleSILACrep1\_pL2ESLS\_F01  
 Scannumber: 9854  
 Protein: BSU24990; pst5; yqgG; yzmB  
 Peptide Score: 77.96  
 Method: ITMS; CID; 3

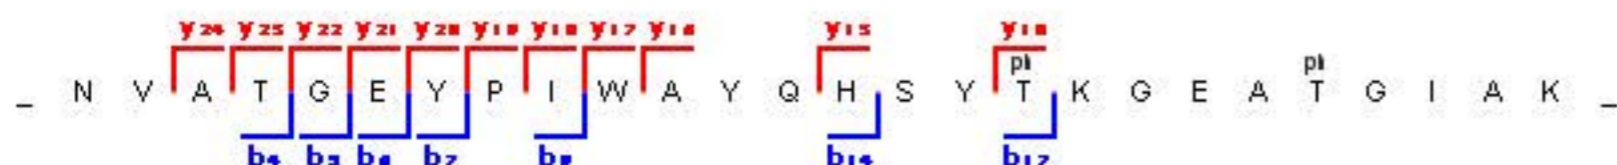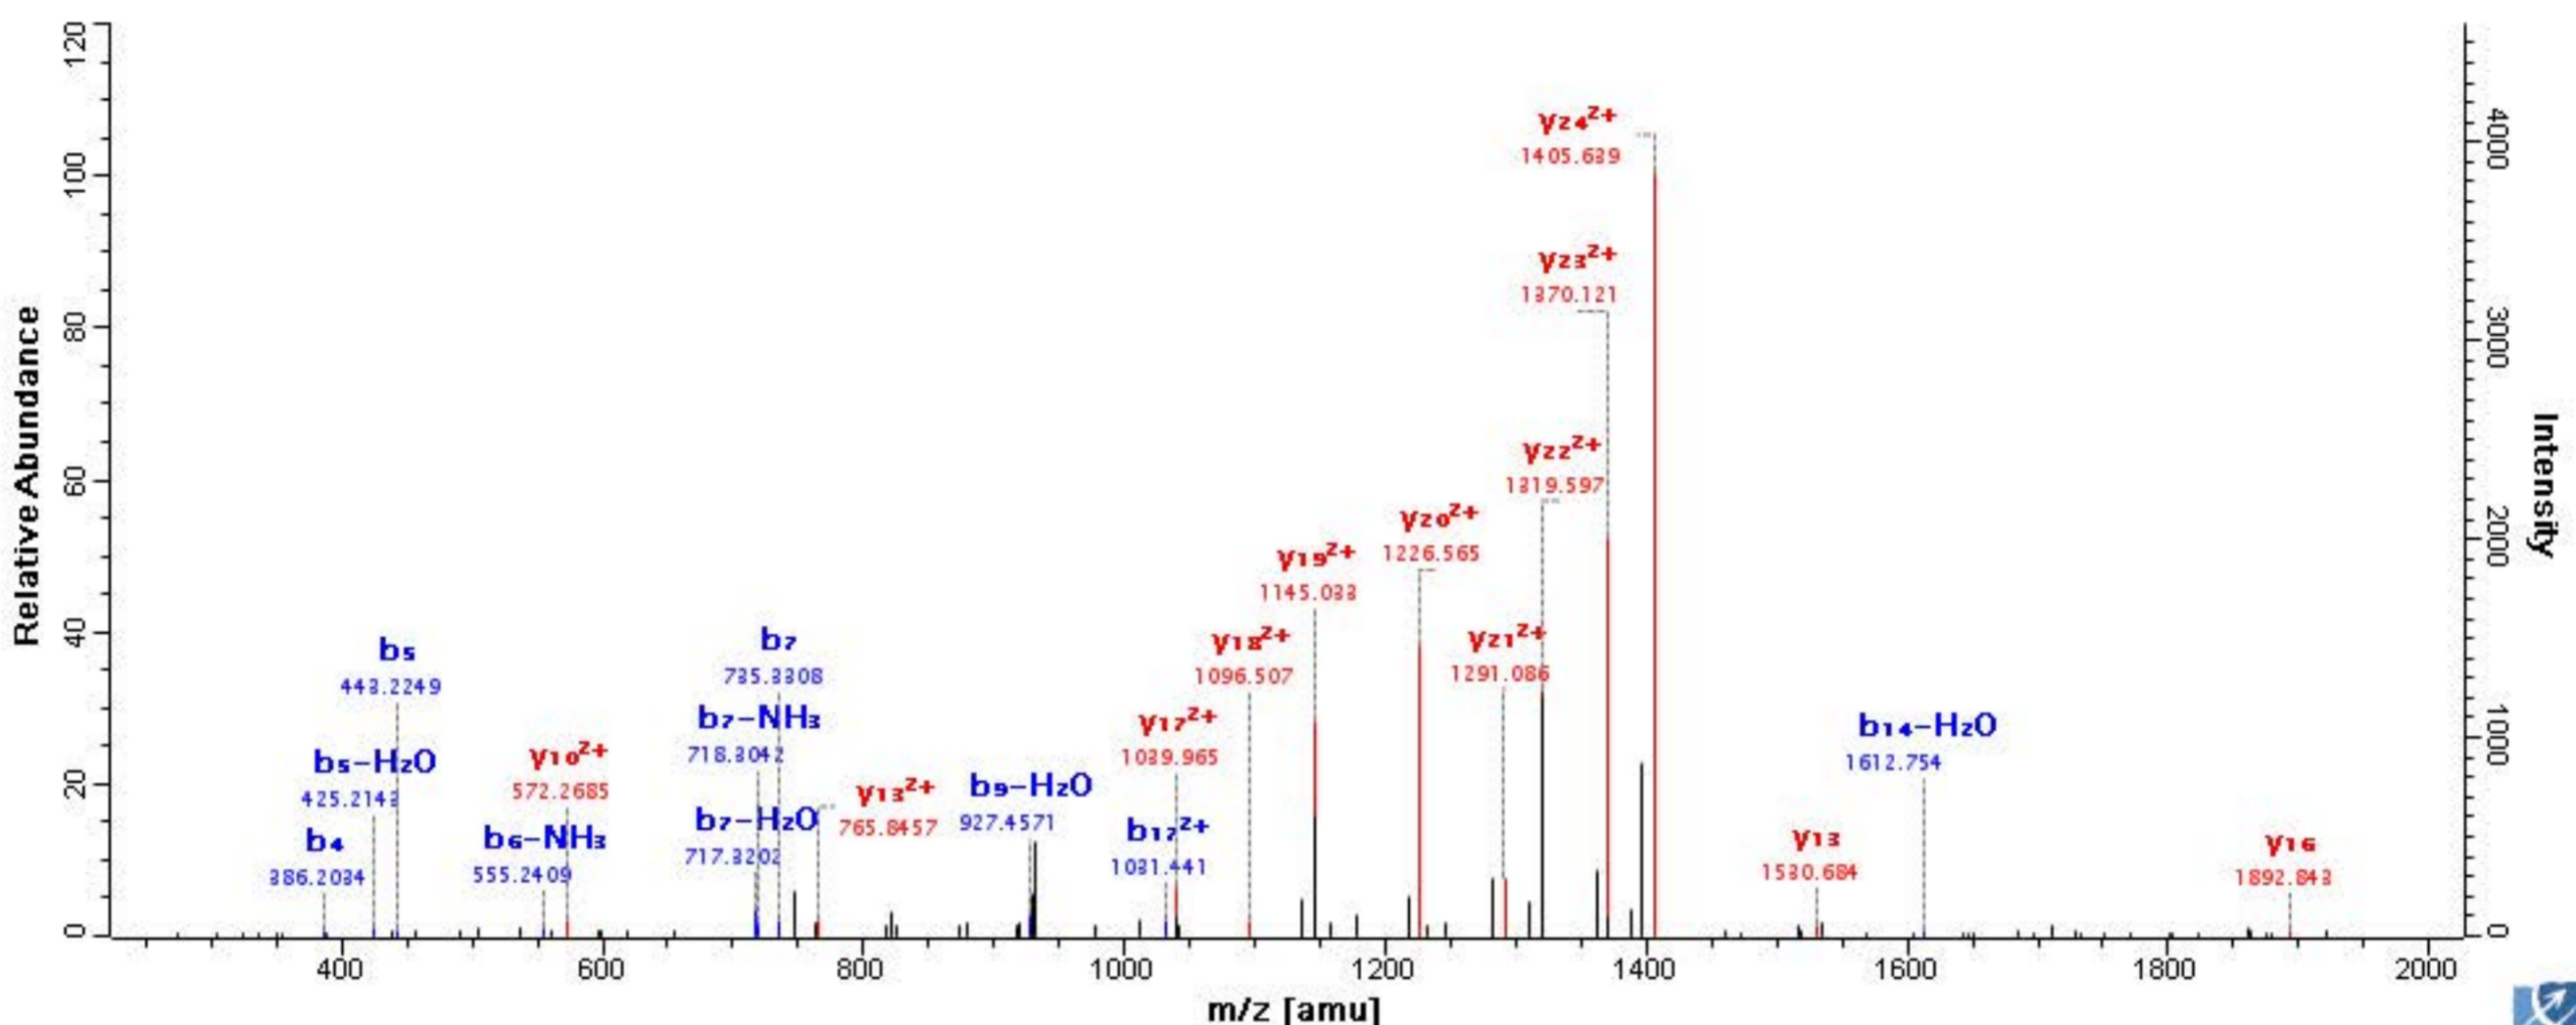

#### precursor information

|                   |                     |
|-------------------|---------------------|
| Mass:             | 3022.37408          |
| m/z:              | System.Collections. |
| Charge:           | System.Collections. |
| Retentiontime:    | System.Collections. |
| Score:            | 77.95942            |
| Mass Error [ppm]: | -0.46558            |
| PEP:              | 0.00042399          |
| Precursor Type:   | ISO                 |

| b <sup>2+</sup> ion |          | b ion     |          |    |     |    | γ ion    |           | γ <sup>2+</sup> ion |           |
|---------------------|----------|-----------|----------|----|-----|----|----------|-----------|---------------------|-----------|
| Δ dalton            | mass     | Δ dalton  | mass     |    | seq |    | Δ dalton | mass      | Δ dalton            | mass      |
|                     | 115.0502 |           | 115.0502 | 1  | N   | 25 |          |           |                     |           |
|                     | 214.1186 |           | 214.1186 | 2  | V   | 24 | 2909.34  |           | 2909.34             |           |
|                     | 285.1557 |           | 285.1557 | 3  | A   | 23 | 2810.271 |           | 1405.639            | +0.33807  |
|                     | 386.2034 | -0.039042 | 386.2034 | 4  | T   | 22 | 2739.234 |           | 1370.121            | +0.195616 |
|                     | 443.2249 | -0.213826 | 443.2249 | 5  | G   | 21 | 2638.187 |           | 1319.597            | -0.010159 |
|                     | 572.2675 |           | 572.2675 | 6  | E   | 20 | 2581.165 |           | 1291.086            | +0.352135 |
|                     | 735.3308 | -0.058212 | 735.3308 | 7  | Y   | 19 | 2452.123 |           | 1226.565            | +0.296283 |
|                     | 832.3836 |           | 832.3836 | 8  | P   | 18 | 2289.059 |           | 1145.033            | -0.022028 |
|                     | 945.4676 |           | 945.4676 | 9  | I   | 17 | 2192.006 |           | 1096.507            | -0.265177 |
|                     | 1131.547 |           | 1131.547 | 10 | W   | 16 | 2078.922 |           | 1039.965            | -0.054688 |
|                     | 1202.584 |           | 1202.584 | 11 | A   | 15 | 1892.843 | +0.122354 | 1892.843            |           |
|                     | 1365.647 |           | 1365.647 | 12 | Y   | 14 | 1821.806 |           | 1821.806            |           |
|                     | 1493.706 |           | 1493.706 | 13 | Q   | 13 | 1658.743 |           | 1658.743            |           |
|                     | 1630.765 |           | 1630.765 | 14 | H   | 12 | 1530.684 | -0.152586 | 765.8457            | -0.054174 |
|                     | 1717.797 |           | 1717.797 | 15 | S   | 11 | 1393.625 |           | 1393.625            |           |
|                     | 1880.86  |           | 1880.86  | 16 | Y   | 10 | 1306.593 |           | 1306.593            |           |
| -0.46993            | 1031.441 |           | 2061.874 | 17 | T   | 9  | 1143.53  |           | 572.2685            | +0.028942 |
|                     | 2193.994 |           | 2193.994 | 18 | K   | 8  | 962.5158 |           | 962.5158            |           |
|                     | 2251.016 |           | 2251.016 | 19 | G   | 7  | 830.3957 |           | 830.3957            |           |
|                     | 2380.058 |           | 2380.058 | 20 | E   | 6  | 773.3743 |           | 773.3743            |           |
|                     | 2451.095 |           | 2451.095 | 21 | A   | 5  | 644.3317 |           | 644.3317            |           |
|                     | 2632.109 |           | 2632.109 | 22 | T   | 4  | 573.2946 |           | 573.2946            |           |
|                     | 2689.131 |           | 2689.131 | 23 | G   | 3  | 392.2806 |           | 392.2806            |           |
|                     | 2802.215 |           | 2802.215 | 24 | I   | 2  | 335.2591 |           | 335.2591            |           |
|                     | 2873.252 |           | 2873.252 | 25 | A   | 1  | 222.175  |           | 222.175             |           |
|                     |          |           |          | 26 | K   | 0  | 151.1379 |           | 151.1379            |           |

#### general information

|                       |             |
|-----------------------|-------------|
| Annotation:           | 11 of 26    |
| AminoAcids Coverage:  | 42 %        |
| Intensity Coverage:   | 61 %        |
| Protein Localisation: | 237 ... 262 |

Source: 201205213\_VR\_Bsu\_TripleSILACrep1\_pL2ESLS\_F02  
 Scannumber: 10079  
 Protein: BSU23860; yqj1  
 Peptide Score: 83.89  
 Method: ITMS; CID; 3

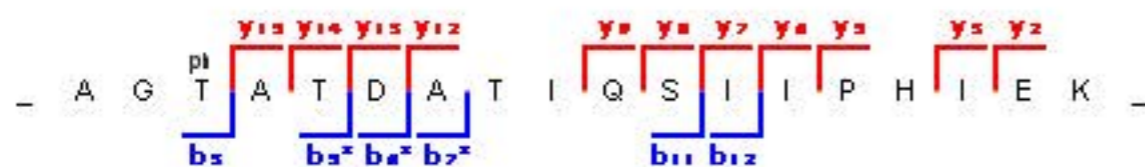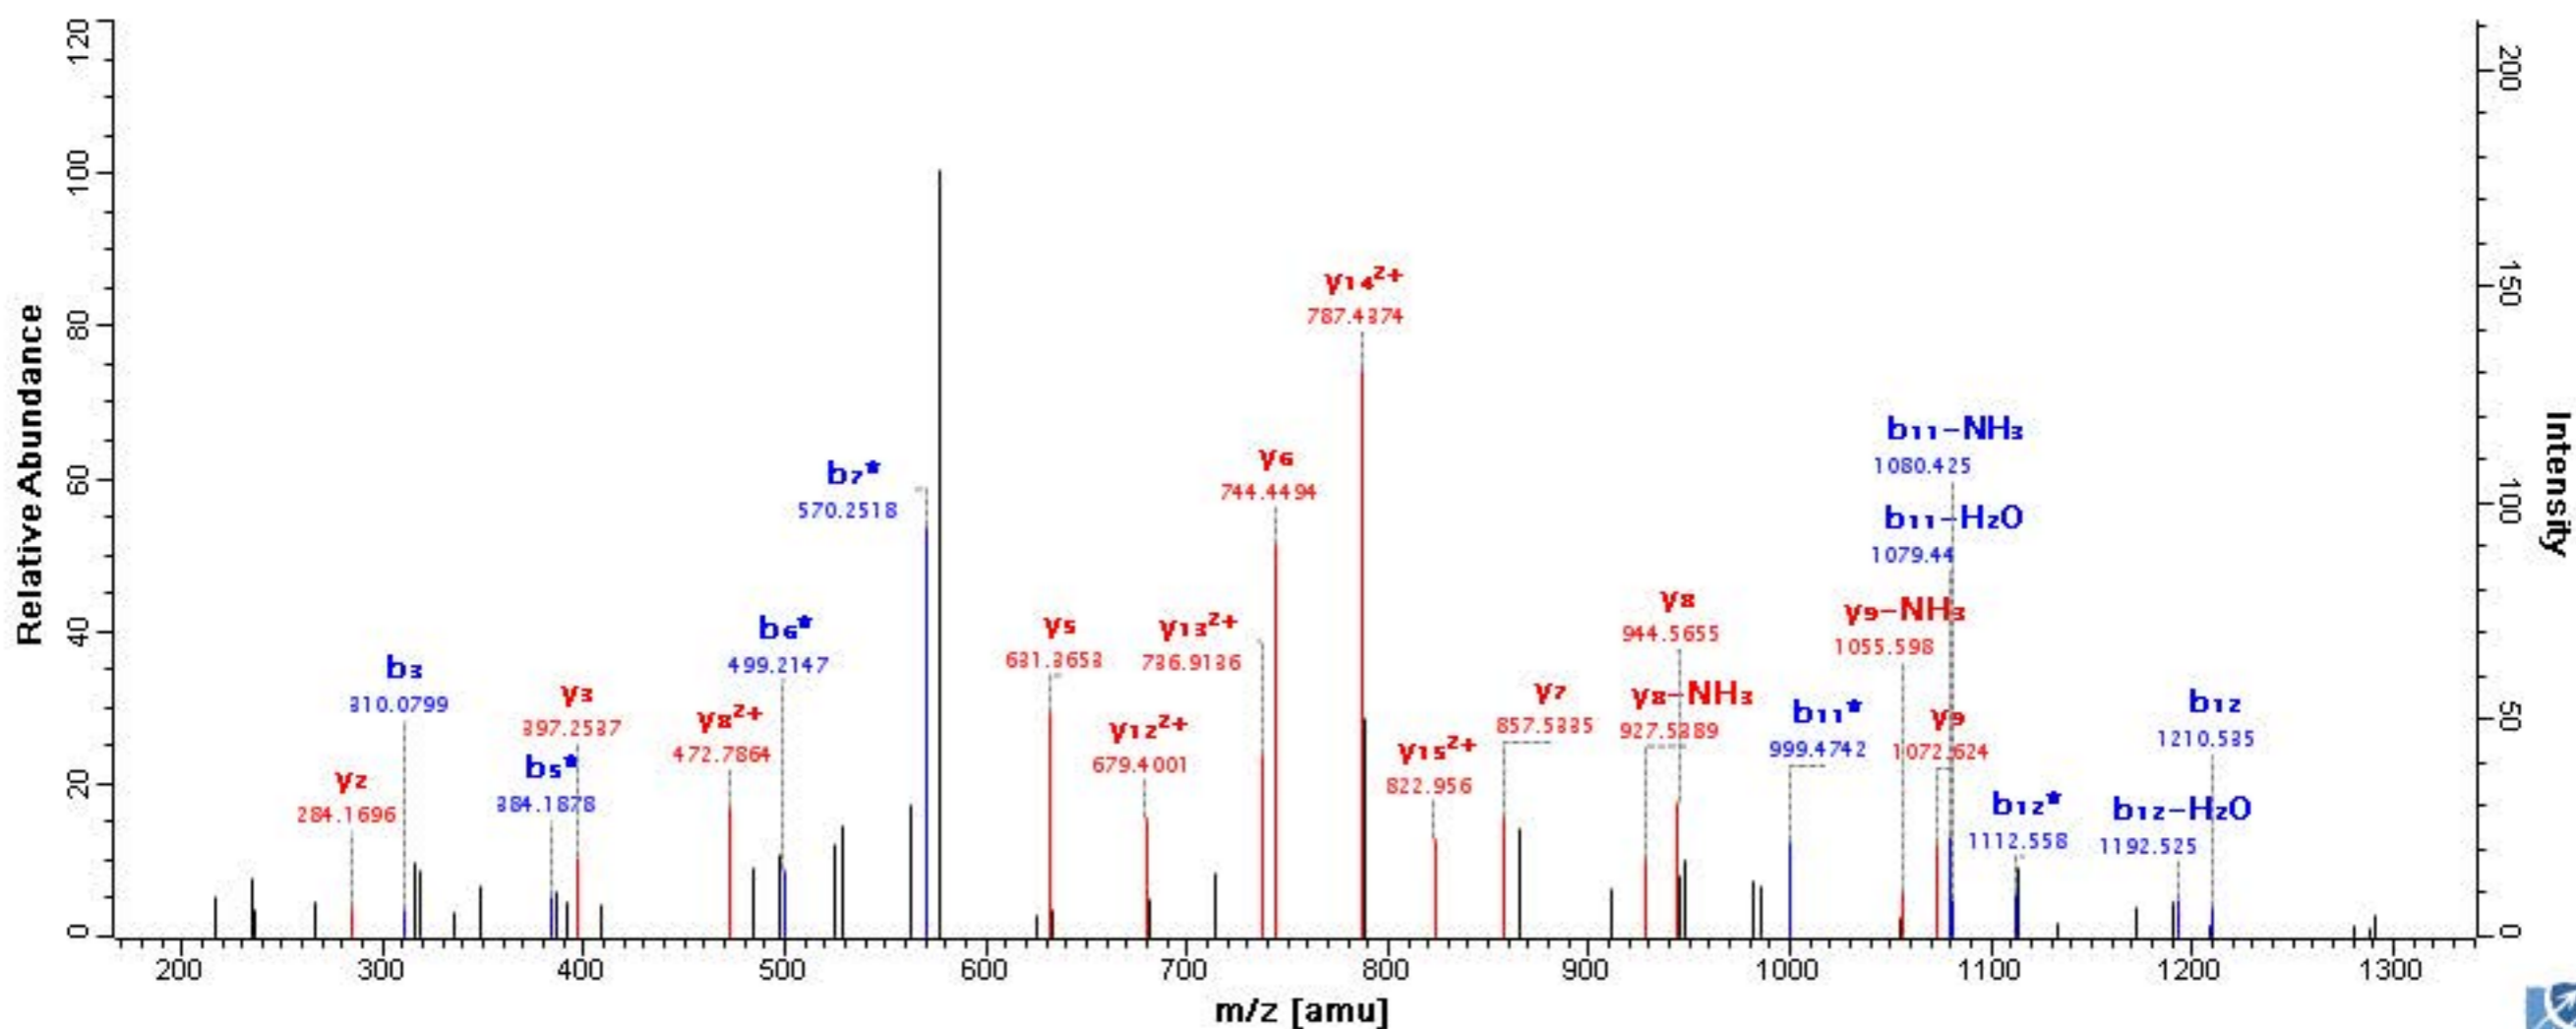

#### precursor information

|                   |                     |
|-------------------|---------------------|
| Mass:             | 1944.95515          |
| m/z:              | System.Collections. |
| Charge:           | System.Collections. |
| Retentiontime:    | System.Collections. |
| Score:            | 83.89419            |
| Mass Error [ppm]: | -0.31898            |
| PEP:              | 0.00092185          |
| Precursor Type:   | MULTI               |

#### general information

|                       |           |
|-----------------------|-----------|
| Annotation:           | 12 of 18  |
| AminoAcids Coverage:  | 67 %      |
| Intensity Coverage:   | 49 %      |
| Protein Localisation: | 76 ... 93 |

| b ion      |              |    |     |    | y ion        |            | y <sup>2+</sup> ion |            |
|------------|--------------|----|-----|----|--------------|------------|---------------------|------------|
| Δ dalton   | mass         |    | seq |    | Δ dalton     | mass       | Δ dalton            | mass       |
|            | 72.044390254 | 1  | A   | 17 |              |            |                     |            |
|            | 129.06585398 | 2  | G   | 16 | 1882.9401338 |            | 1882.9401338        |            |
| -0.0213301 | 310.07986286 | 3  | T   | 15 | 1825.9186701 |            | 1825.9186701        |            |
|            | 381.11697665 | 4  | A   | 14 | 1644.9046612 |            | 822.95596883        | +0.2310429 |
|            | 482.16465512 | 5  | T   | 13 | 1573.8675474 |            | 787.43741194        | -0.1449925 |
|            | 597.19159815 | 6  | D   | 12 | 1472.8198689 |            | 736.9135727         | +0.1183487 |
|            | 668.22871194 | 7  | A   | 11 | 1357.7929259 |            | 679.40010118        | +0.2462611 |
|            | 769.27639042 | 8  | T   | 10 | 1286.7558121 |            | 1286.7558121        |            |
|            | 882.3604544  | 9  | I   | 9  | 1185.7081336 |            | 1185.7081336        |            |
|            | 1010.4190319 | 10 | Q   | 8  | 1072.6240697 | +0.03157   | 1072.6240697        |            |
|            | 1097.4510603 | 11 | S   | 7  | 944.56549215 | -0.1573501 | 472.78638431        | +0.1581347 |
| -0.0436692 | 1210.5351243 | 12 | I   | 6  | 857.53346374 | -0.0636761 | 857.53346374        |            |
|            | 1323.6191883 | 13 | I   | 5  | 744.44939976 | +0.0024435 | 744.44939976        |            |
|            | 1420.6719521 | 14 | P   | 4  | 631.36533577 | +0.1314904 | 631.36533577        |            |
|            | 1557.730864  | 15 | H   | 3  | 534.31257192 |            | 534.31257192        |            |
|            | 1670.814928  | 16 | I   | 2  | 397.25366006 | -0.2611674 | 397.25366006        |            |
|            | 1799.8575211 | 17 | E   | 1  | 284.16959608 | -0.1257728 | 284.16959608        |            |
|            |              | 18 | K   | 0  | 155.12700298 |            | 155.12700298        |            |

Source: 201205213\_VR\_Bsu\_TripleSILACrep1\_pL2ESLS\_FD2  
 Scannumber: 11365  
 Protein: BSU07870; yfkK  
 Peptide Score: 59.73  
 Method: ITMS; CID; 3

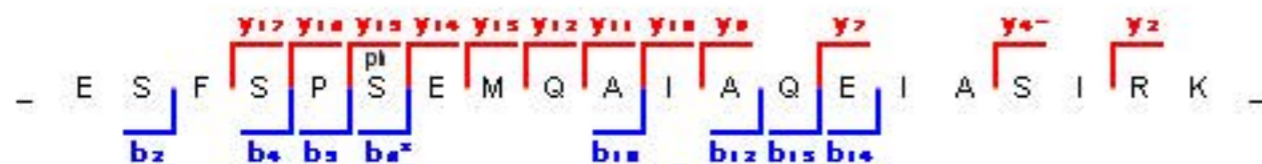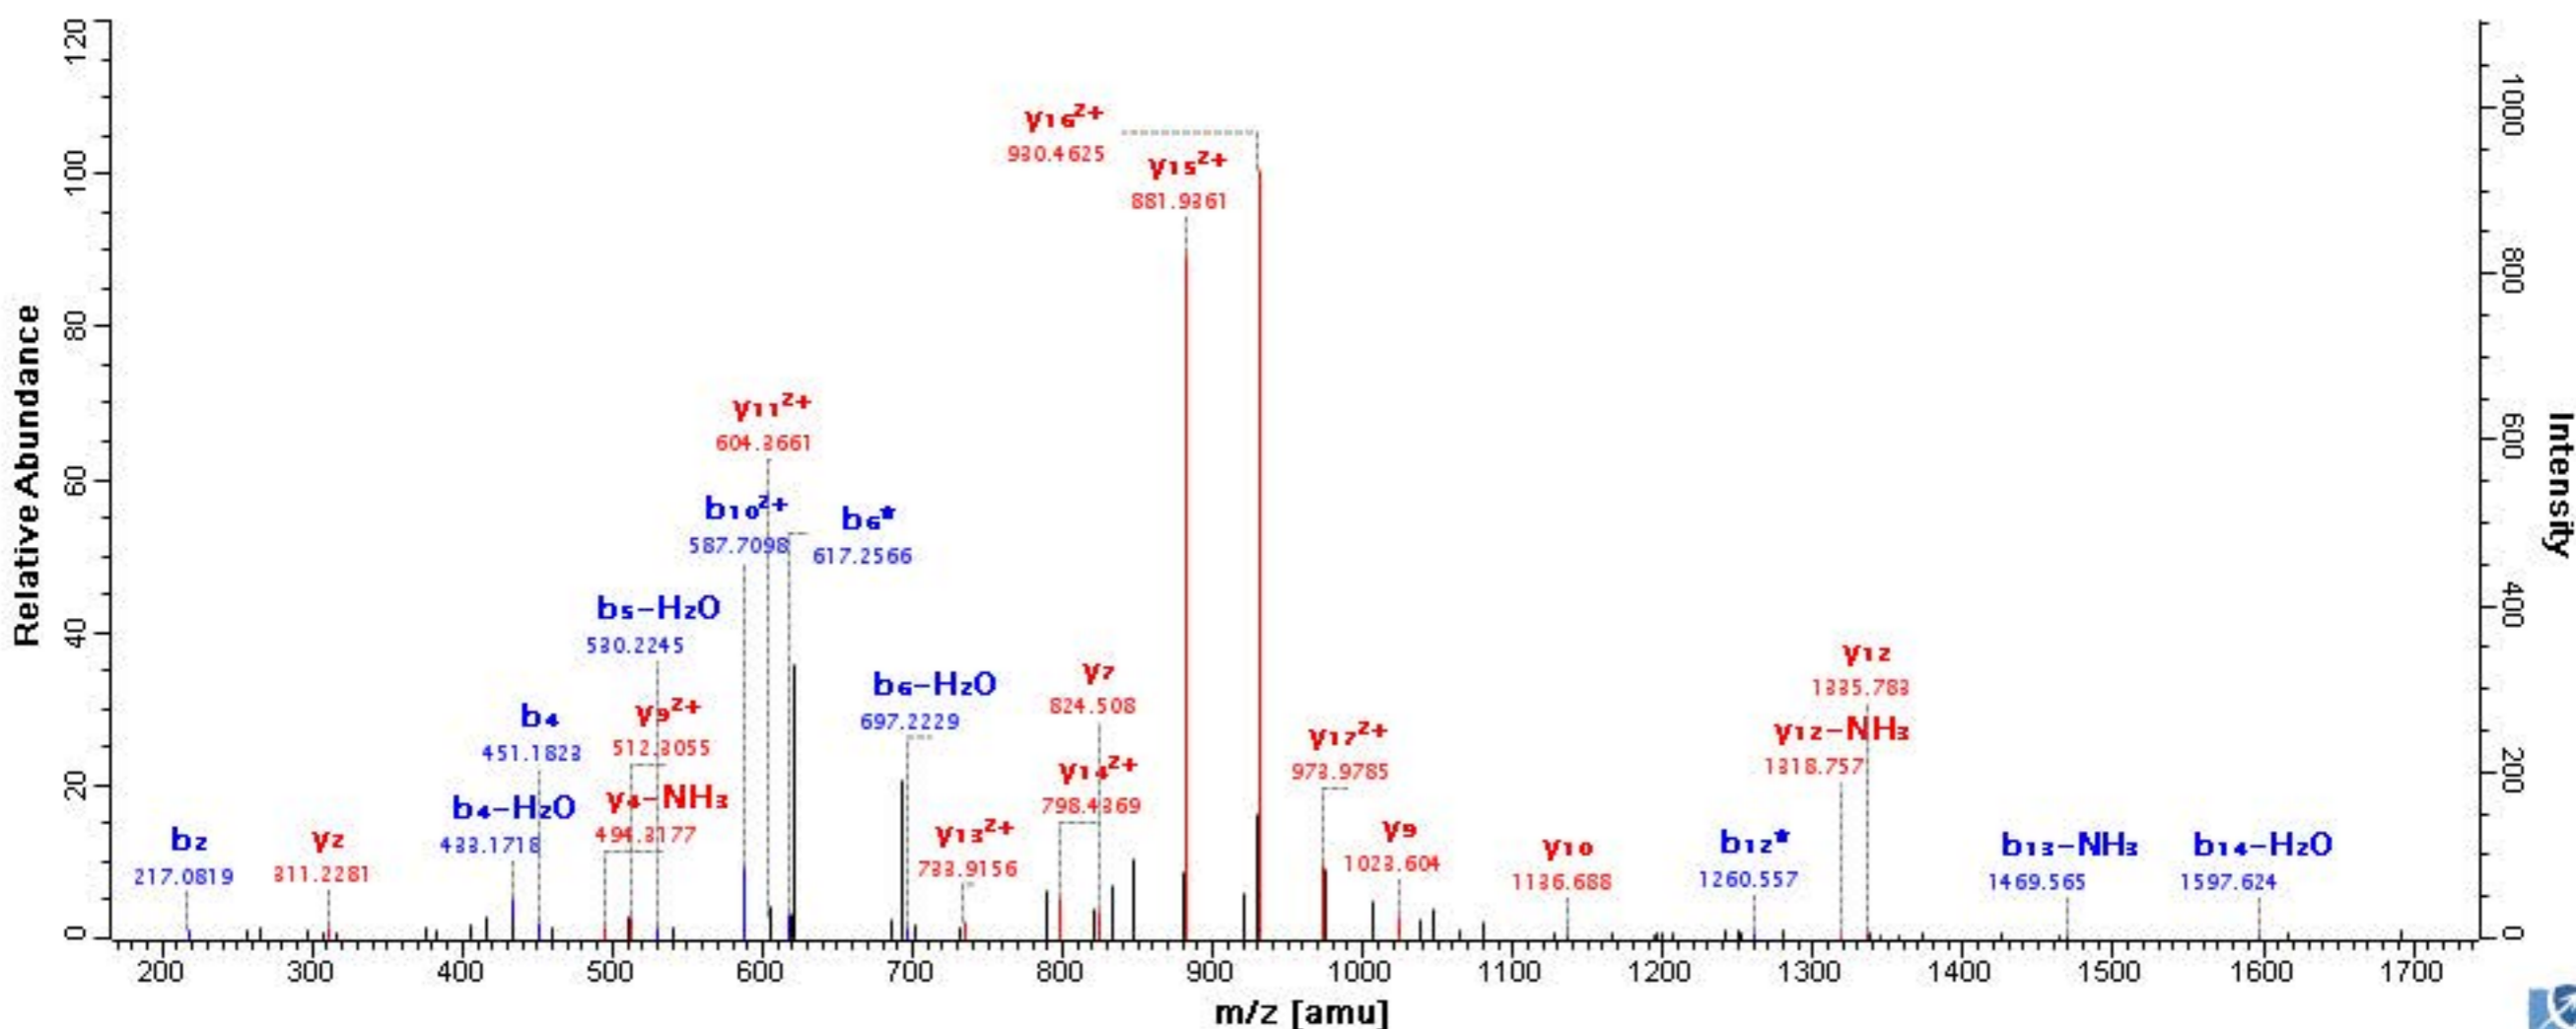

#### precursor information

|                   |                     |
|-------------------|---------------------|
| Mass:             | 2301.07116          |
| m/z:              | System.Collections. |
| Charge:           | System.Collections. |
| Retentiontime:    | System.Collections. |
| Score:            | 59.72772            |
| Mass Error [ppm]: | -0.021625           |
| PEP:              | 0.0068311           |
| Precursor Type:   | MULTI               |

#### general information

|                       |           |
|-----------------------|-----------|
| Annotation:           | 14 of 20  |
| AminoAcids Coverag    | 70 %      |
| Intensity Coverage:   | 57 %      |
| Protein Localisation: | 52 ... 71 |

| b <sup>2+</sup> ion |          | b ion     |          | seq |   |    | γ ion    |           | γ <sup>2+</sup> ion |           |
|---------------------|----------|-----------|----------|-----|---|----|----------|-----------|---------------------|-----------|
| Δ dalton            | mass     | Δ dalton  | mass     |     |   |    | Δ dalton | mass      | Δ dalton            | mass      |
|                     | 130.0499 |           | 130.0499 | 1   | E | 19 |          |           |                     |           |
|                     | 217.0819 | +0.184444 | 217.0819 | 2   | S | 18 | 2181.05  |           | 2181.05             |           |
|                     | 364.1503 |           | 364.1503 | 3   | F | 17 | 2094.018 |           | 2094.018            |           |
|                     | 451.1823 | +0.034151 | 451.1823 | 4   | S | 16 | 1946.95  |           | 973.9785            | -0.012156 |
|                     | 548.2351 |           | 548.2351 | 5   | P | 15 | 1859.918 |           | 930.4625            | +0.251966 |
|                     | 715.2335 |           | 715.2335 | 6   | S | 14 | 1762.865 |           | 881.9361            | -0.137973 |
|                     | 844.2761 |           | 844.2761 | 7   | E | 13 | 1595.867 |           | 798.4369            | -0.094665 |
|                     | 975.3165 |           | 975.3165 | 8   | M | 12 | 1466.824 |           | 733.9156            | +0.330684 |
|                     | 1103.375 |           | 1103.375 | 9   | Q | 11 | 1335.783 | -0.28025  | 1335.783            |           |
| +0.240136           | 587.7098 |           | 1174.412 | 10  | A | 10 | 1207.725 |           | 604.3661            | +0.193204 |
|                     | 1287.496 |           | 1287.496 | 11  | I | 9  | 1136.688 | +0.151135 | 1136.688            |           |
|                     | 1358.533 |           | 1358.533 | 12  | A | 8  | 1023.604 | +0.237823 | 512.3055            | -0.00463  |
|                     | 1486.592 |           | 1486.592 | 13  | Q | 7  | 952.5666 |           | 952.5666            |           |
|                     | 1615.635 |           | 1615.635 | 14  | E | 6  | 824.508  | -0.185651 | 824.508             |           |
|                     | 1728.719 |           | 1728.719 | 15  | I | 5  | 695.4654 |           | 695.4654            |           |
|                     | 1799.756 |           | 1799.756 | 16  | A | 4  | 582.3813 |           | 582.3813            |           |
|                     | 1886.788 |           | 1886.788 | 17  | S | 3  | 511.3442 |           | 511.3442            |           |
|                     | 1999.872 |           | 1999.872 | 18  | I | 2  | 424.3122 |           | 424.3122            |           |
|                     | 2155.973 |           | 2155.973 | 19  | R | 1  | 311.2281 | -0.134761 | 311.2281            |           |
|                     |          |           |          | 20  | K | 0  | 155.127  |           | 155.127             |           |

Source: 201205213\_VR\_Bsu\_TripleSILACrep1\_pL2ESLS\_F02  
 Scannumber: 11578  
 Protein: BSU31350; pgi; yugL  
 Peptide Score: 159.46  
 Method: ITMS; CID; 3

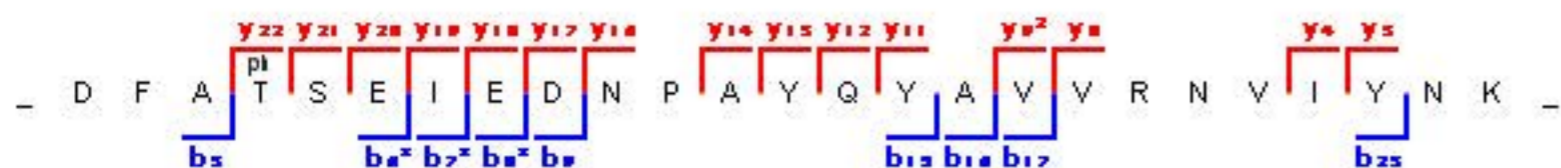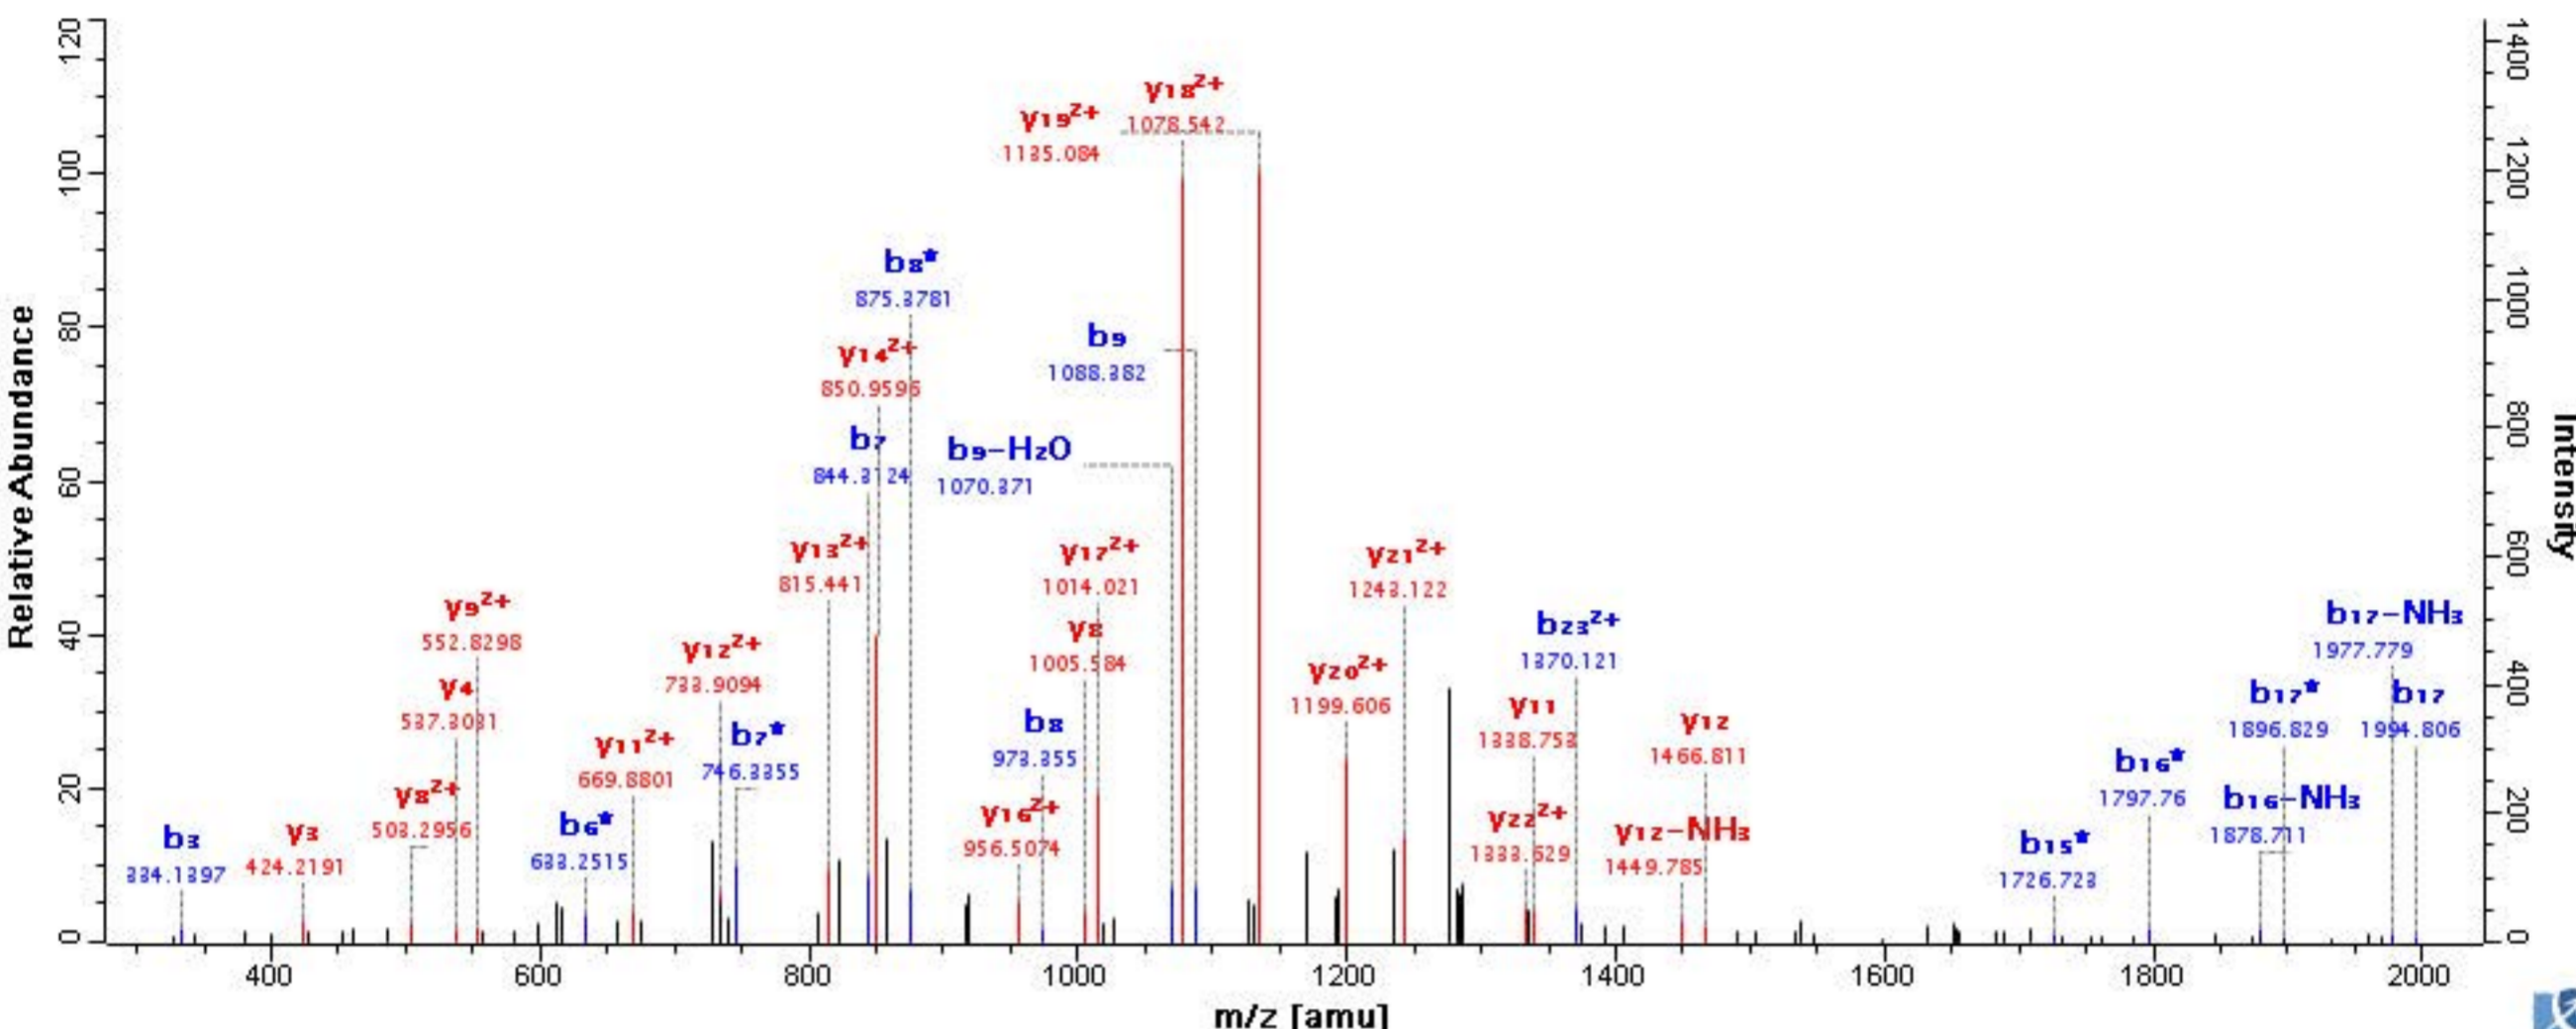

**precursor information**

|                   |                     |
|-------------------|---------------------|
| Mass:             | 2998.37533          |
| m/z:              | System.Collections. |
| Charge:           | System.Collections. |
| Retentiontime:    | System.Collections. |
| Score:            | 159.4646            |
| Mass Error [ppm]: | 0.11698             |
| PEP:              | 4.5718E-36          |
| Precursor Type:   | MULTI               |

| b <sup>2+</sup> ion |          | b ion     |          |     | y ion |          | y <sup>2+</sup> ion |           |          |
|---------------------|----------|-----------|----------|-----|-------|----------|---------------------|-----------|----------|
| Δ dalton            | mass     | Δ dalton  | mass     | seq |       | Δ dalton | mass                | Δ dalton  | mass     |
|                     | 116.0342 |           | 116.0342 | 1   | D     | 24       |                     |           |          |
|                     | 263.1026 |           | 263.1026 | 2   | F     | 23       | 2884.355            |           | 2884.355 |
|                     | 334.1397 | -0.035499 | 334.1397 | 3   | A     | 22       | 2737.287            |           | 2737.287 |
|                     | 515.1538 |           | 515.1538 | 4   | T     | 21       | 2666.25             |           | 1333.629 |
|                     | 602.1858 |           | 602.1858 | 5   | S     | 20       | 2485.236            |           | 1243.122 |
|                     | 731.2284 |           | 731.2284 | 6   | E     | 19       | 2398.204            |           | 1199.606 |
|                     | 844.3124 | +0.488584 | 844.3124 | 7   | I     | 18       | 2269.161            |           | 1135.084 |
|                     | 973.355  | +0.265205 | 973.355  | 8   | E     | 17       | 2156.077            |           | 1078.542 |
|                     | 1088.382 | +0.124614 | 1088.382 | 9   | D     | 16       | 2027.035            |           | 1014.021 |
|                     | 1202.425 |           | 1202.425 | 10  | N     | 15       | 1912.008            |           | 956.5074 |
|                     | 1299.478 |           | 1299.478 | 11  | P     | 14       | 1797.965            |           | 1797.965 |
|                     | 1370.515 |           | 1370.515 | 12  | A     | 13       | 1700.912            |           | 850.9596 |
|                     | 1533.578 |           | 1533.578 | 13  | Y     | 12       | 1629.875            |           | 815.441  |
|                     | 1661.637 |           | 1661.637 | 14  | Q     | 11       | 1466.811            | +0.280373 | 733.9094 |
|                     | 1824.7   |           | 1824.7   | 15  | Y     | 10       | 1338.753            | -0.367349 | 669.8801 |
|                     | 1895.737 |           | 1895.737 | 16  | A     | 9        | 1175.69             |           | 1175.69  |
|                     | 1994.806 | -0.370609 | 1994.806 | 17  | V     | 8        | 1104.652            |           | 552.8298 |
|                     | 2093.874 |           | 2093.874 | 18  | V     | 7        | 1005.584            | -0.040655 | 503.2956 |
|                     | 2249.975 |           | 2249.975 | 19  | R     | 6        | 906.5156            |           | 906.5156 |
|                     | 2364.018 |           | 2364.018 | 20  | N     | 5        | 750.4145            |           | 750.4145 |
|                     | 2463.086 |           | 2463.086 | 21  | V     | 4        | 636.3715            |           | 636.3715 |
|                     | 2576.17  |           | 2576.17  | 22  | I     | 3        | 537.3031            | +0.020545 | 537.3031 |
| -0.373348           | 1370.121 |           | 2739.234 | 23  | Y     | 2        | 424.2191            | -0.009099 | 424.2191 |
|                     | 2853.277 |           | 2853.277 | 24  | N     | 1        | 261.1557            |           | 261.1557 |
|                     |          |           |          | 25  | K     | 0        | 147.1128            |           | 147.1128 |

**general information**

|                       |             |
|-----------------------|-------------|
| Annotation:           | 19 of 25    |
| AminoAcids Coverage:  | 76 %        |
| Intensity Coverage:   | 61 %        |
| Protein Localisation: | 239 ... 263 |

Source: 201205213\_VR\_Bsu\_TripleSILACrep1\_pL2ESLS\_FD2  
 Scannumber: 12122  
 Protein: BSU06030; groEL; groL; mopA  
 Peptide Score: 136.48  
 Method: ITMS; CID; 3

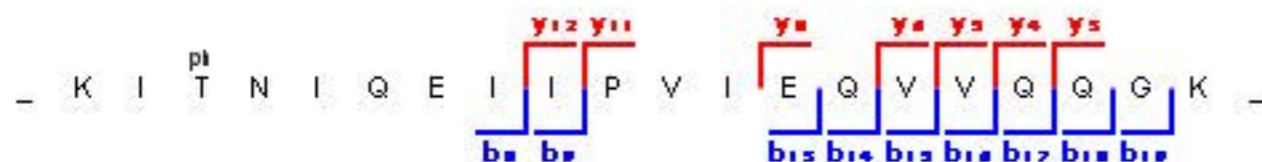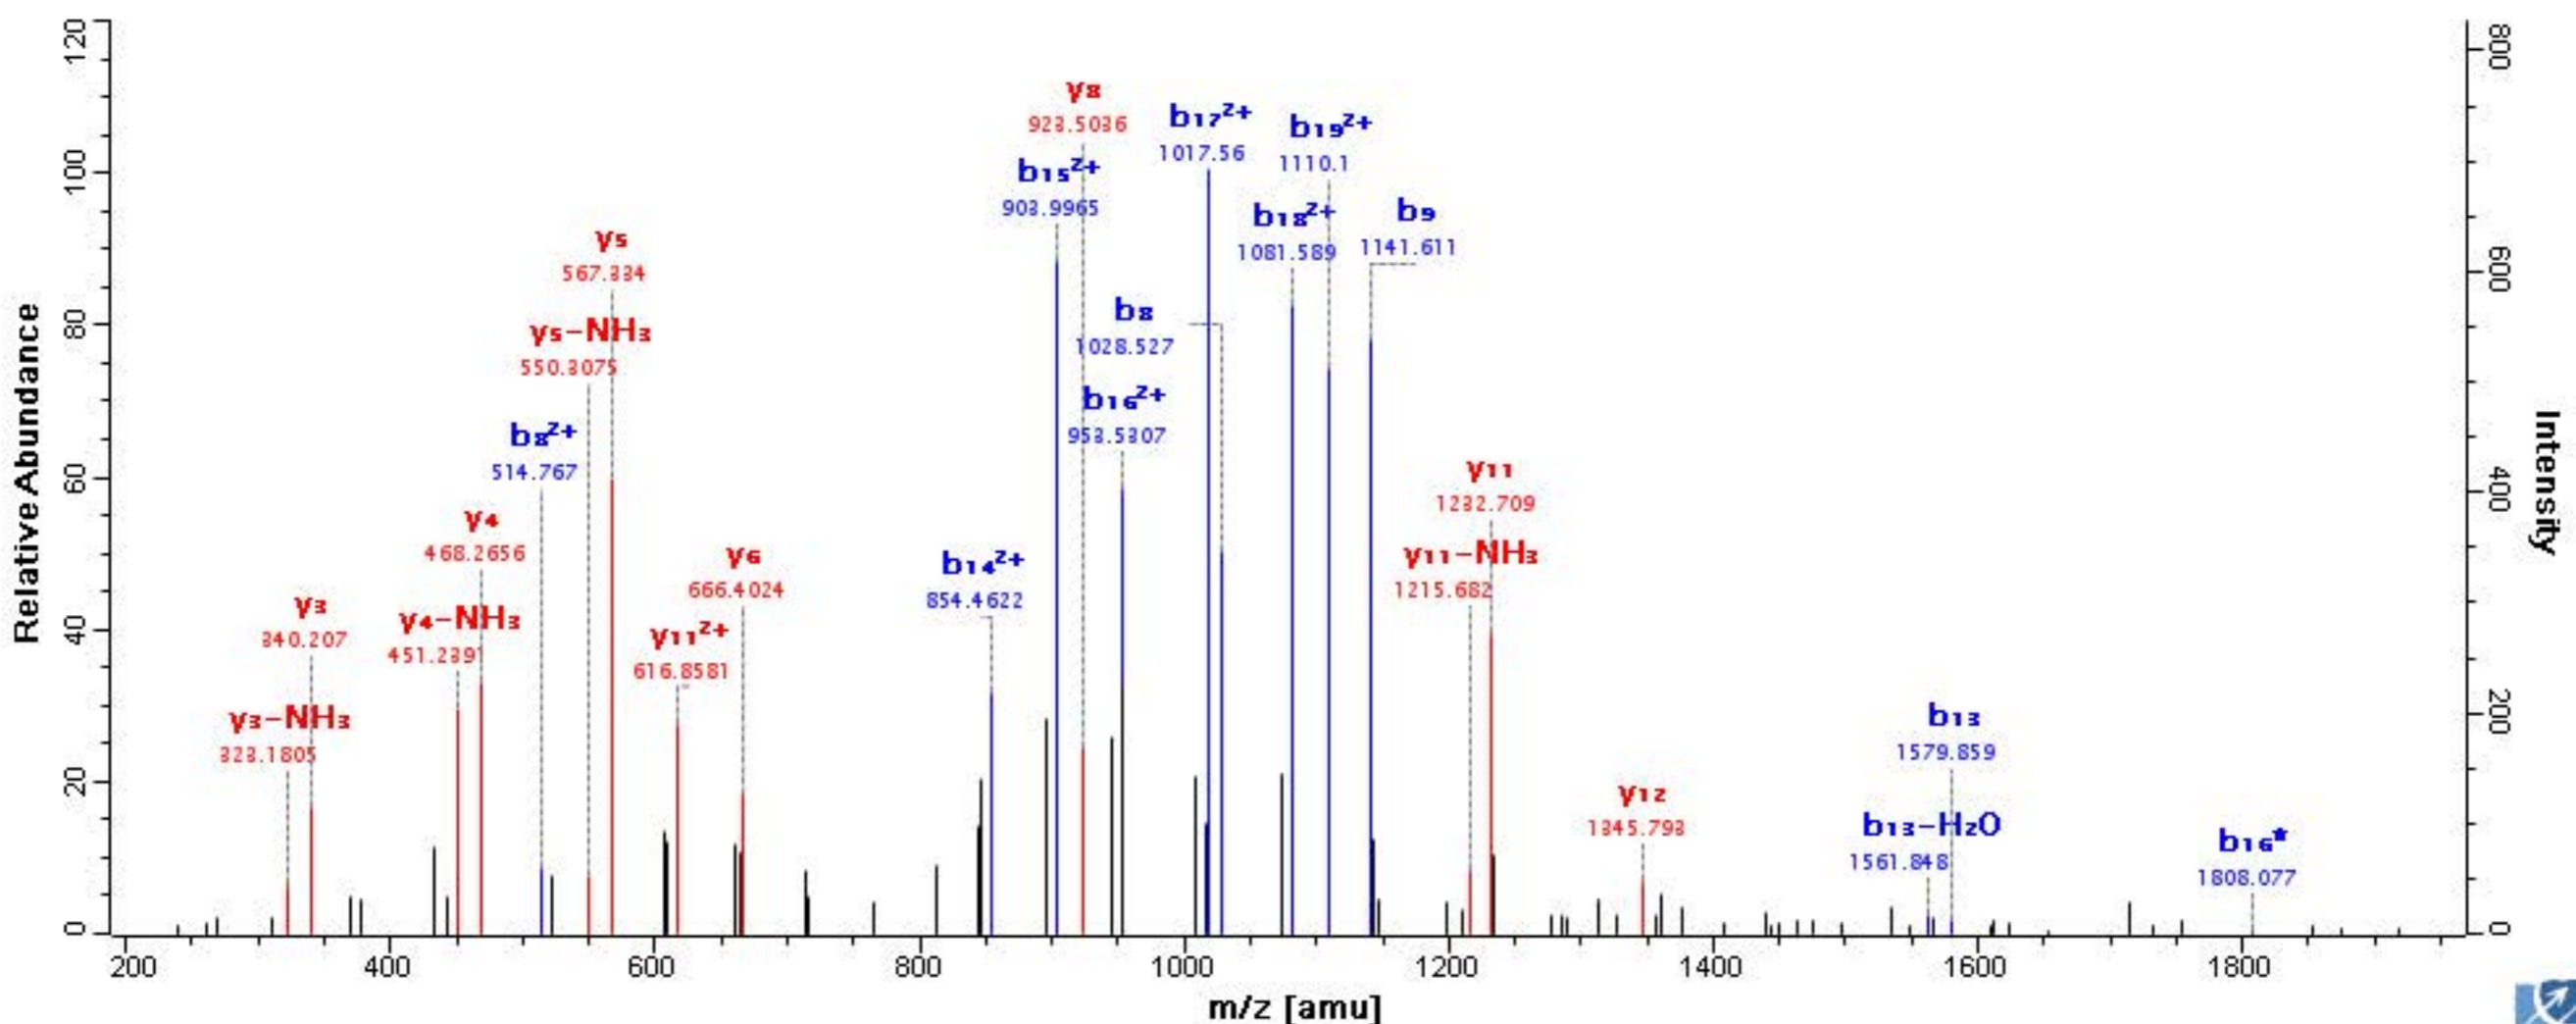

#### precursor information

|                   |                     |
|-------------------|---------------------|
| Mass:             | 2356.27502          |
| m/z:              | System.Collections. |
| Charge:           | System.Collections. |
| Retentiontime:    | System.Collections. |
| Score:            | 136.4758            |
| Mass Error [ppm]: | -0.71315            |
| PEP:              | 6.4675E-16          |
| Precursor Type:   | MULTI               |

| b <sup>2+</sup> ion |          | b ion     |          | seq |   |    | γ ion    |           | γ <sup>2+</sup> ion |           |
|---------------------|----------|-----------|----------|-----|---|----|----------|-----------|---------------------|-----------|
| Δ dalton            | mass     | Δ dalton  | mass     |     |   |    | Δ dalton | mass      | Δ dalton            | mass      |
|                     | 137.1164 |           | 137.1164 | 1   | K | 19 |          |           |                     |           |
|                     | 250.2005 |           | 250.2005 | 2   | I | 18 | 2237.203 |           | 2237.203            |           |
|                     | 431.2145 |           | 431.2145 | 3   | T | 17 | 2124.119 |           | 2124.119            |           |
|                     | 545.2574 |           | 545.2574 | 4   | N | 16 | 1943.105 |           | 1943.105            |           |
|                     | 658.3415 |           | 658.3415 | 5   | I | 15 | 1829.062 |           | 1829.062            |           |
|                     | 786.4001 |           | 786.4001 | 6   | Q | 14 | 1715.978 |           | 1715.978            |           |
|                     | 915.4427 |           | 915.4427 | 7   | E | 13 | 1587.92  |           | 1587.92             |           |
| +0.063071           | 514.767  | -0.05579  | 1028.527 | 8   | I | 12 | 1458.877 |           | 1458.877            |           |
|                     | 1141.611 | -0.068809 | 1141.611 | 9   | I | 11 | 1345.793 | +0.070722 | 1345.793            |           |
|                     | 1238.664 |           | 1238.664 | 10  | P | 10 | 1232.709 | -0.090576 | 616.8581            | +0.174646 |
|                     | 1337.732 |           | 1337.732 | 11  | V | 9  | 1135.656 |           | 1135.656            |           |
|                     | 1450.816 |           | 1450.816 | 12  | I | 8  | 1036.588 |           | 1036.588            |           |
|                     | 1579.859 | -0.203607 | 1579.859 | 13  | E | 7  | 923.5036 | -0.016254 | 923.5036            |           |
| +0.281529           | 854.4622 |           | 1707.917 | 14  | Q | 6  | 794.461  |           | 794.461             |           |
| +0.258675           | 903.9965 |           | 1806.986 | 15  | V | 5  | 666.4024 | +0.026811 | 666.4024            |           |
| -0.082356           | 953.5307 |           | 1906.054 | 16  | V | 4  | 567.334  | +0.059763 | 567.334             |           |
| +0.174855           | 1017.56  |           | 2034.113 | 17  | Q | 3  | 468.2656 | -0.063473 | 468.2656            |           |
| +0.332883           | 1081.589 |           | 2162.171 | 18  | Q | 2  | 340.207  | +0.04854  | 340.207             |           |
| +0.175789           | 1110.1   |           | 2219.193 | 19  | G | 1  | 212.1485 |           | 212.1485            |           |
|                     |          |           |          | 20  | K | 0  | 155.127  |           | 155.127             |           |

#### general information

|                       |             |
|-----------------------|-------------|
| Annotation:           | 10 of 20    |
| AminoAcids Coverage:  | 50 %        |
| Intensity Coverage:   | 66 %        |
| Protein Localisation: | 224 ... 243 |

Source: 201205213\_VR\_Bsu\_TripleSILACrep1\_pL2ESLS\_F02  
 Scannumber: 6236  
 Protein: BSU17890; tkt; tktA  
 Peptide Score: 178.71  
 Method: ITMS; CID; 3

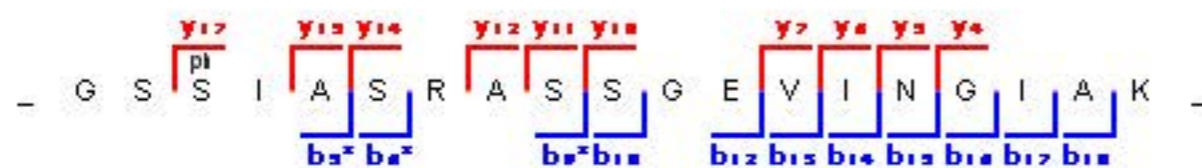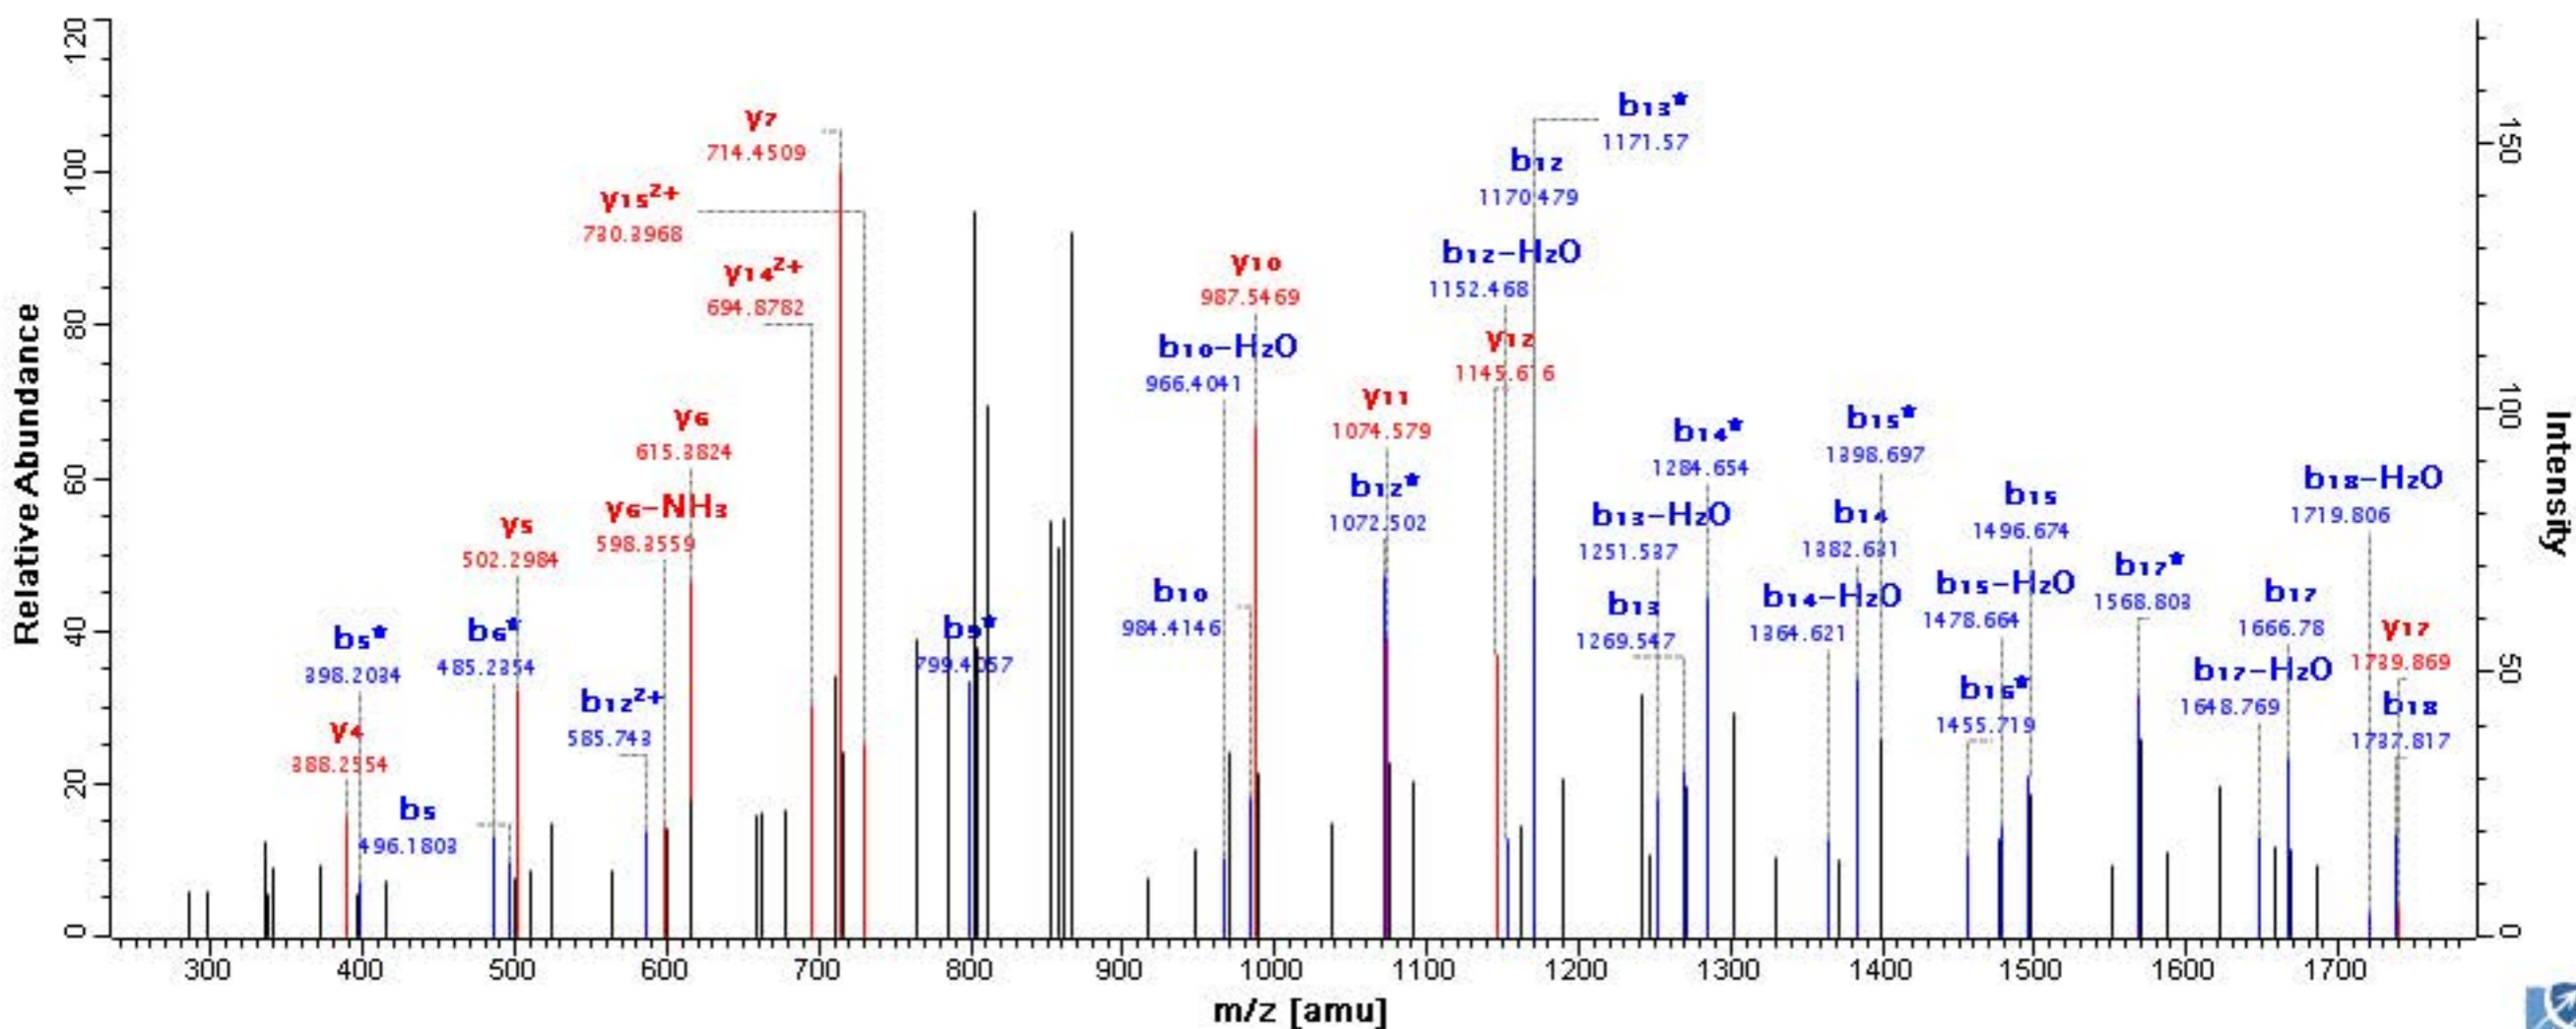

#### precursor information

|                   |                     |
|-------------------|---------------------|
| Mass:             | 1882.91433          |
| m/z:              | System.Collections. |
| Charge:           | System.Collections. |
| Retentiontime:    | System.Collections. |
| Score:            | 178.7066            |
| Mass Error [ppm]: | -0.33965            |
| PEP:              | 3.4433E-41          |
| Precursor Type:   | MULTI               |

| b <sup>2+</sup> ion |          | b ion     |          | seq |   | y ion    |          | y <sup>2+</sup> ion |          |
|---------------------|----------|-----------|----------|-----|---|----------|----------|---------------------|----------|
| Δ dalton            | mass     | Δ dalton  | mass     |     |   | Δ dalton | mass     | Δ dalton            | mass     |
|                     | 58.02874 |           | 58.02874 | 1   | G | 18       |          |                     |          |
|                     | 145.0608 |           | 145.0608 | 2   | S | 17       | 1826.901 |                     | 1826.901 |
|                     | 312.0591 |           | 312.0591 | 3   | S | 16       | 1739.869 | -0.098613           | 1739.869 |
|                     | 425.1432 |           | 425.1432 | 4   | I | 15       | 1572.87  |                     | 1572.87  |
|                     | 496.1803 | -0.201362 | 496.1803 | 5   | A | 14       | 1459.786 |                     | 730.3968 |
|                     | 583.2123 |           | 583.2123 | 6   | S | 13       | 1388.749 |                     | 694.8782 |
|                     | 739.3134 |           | 739.3134 | 7   | R | 12       | 1301.717 |                     | 1301.717 |
|                     | 810.3506 |           | 810.3506 | 8   | A | 11       | 1145.616 | +0.153331           | 1145.616 |
|                     | 897.3826 |           | 897.3826 | 9   | S | 10       | 1074.579 | -0.090073           | 1074.579 |
|                     | 984.4146 | +0.052182 | 984.4146 | 10  | S | 9        | 987.5469 | +0.168945           | 987.5469 |
|                     | 1041.436 |           | 1041.436 | 11  | G | 8        | 900.5149 |                     | 900.5149 |
| +0.444648           | 585.743  | -0.019932 | 1170.479 | 12  | E | 7        | 843.4934 |                     | 843.4934 |
|                     | 1269.547 | -0.11984  | 1269.547 | 13  | V | 6        | 714.4509 | -0.044967           | 714.4509 |
|                     | 1382.631 | -0.062058 | 1382.631 | 14  | I | 5        | 615.3824 | -0.029654           | 615.3824 |
|                     | 1496.674 | -0.045659 | 1496.674 | 15  | N | 4        | 502.2984 | -0.030368           | 502.2984 |
|                     | 1553.696 |           | 1553.696 | 16  | G | 3        | 388.2554 | +0.108263           | 388.2554 |
|                     | 1666.78  | +0.082822 | 1666.78  | 17  | I | 2        | 331.234  |                     | 331.234  |
|                     | 1737.817 | -0.214912 | 1737.817 | 18  | A | 1        | 218.1499 |                     | 218.1499 |
|                     |          |           |          | 19  | K | 0        | 147.1128 |                     | 147.1128 |

#### general information

|                       |             |
|-----------------------|-------------|
| Annotation:           | 14 of 19    |
| AminoAcids Coverage:  | 74%         |
| Intensity Coverage:   | 43%         |
| Protein Localisation: | 351 ... 369 |



Source: 201205213\_VR\_Bsu\_TripleSILACrep1\_pL2ESLS\_F03  
 Scannumber: 10561  
 Protein: BSU17890; tkt; tktA  
 Peptide Score: 183.36  
 Method: ITMS; CID; 3

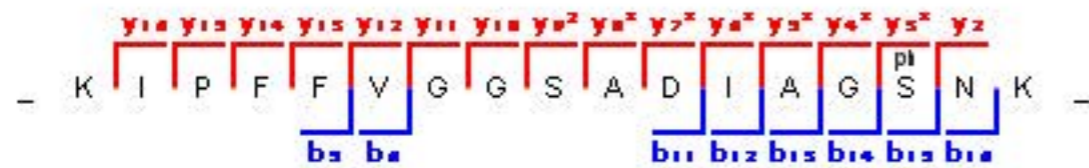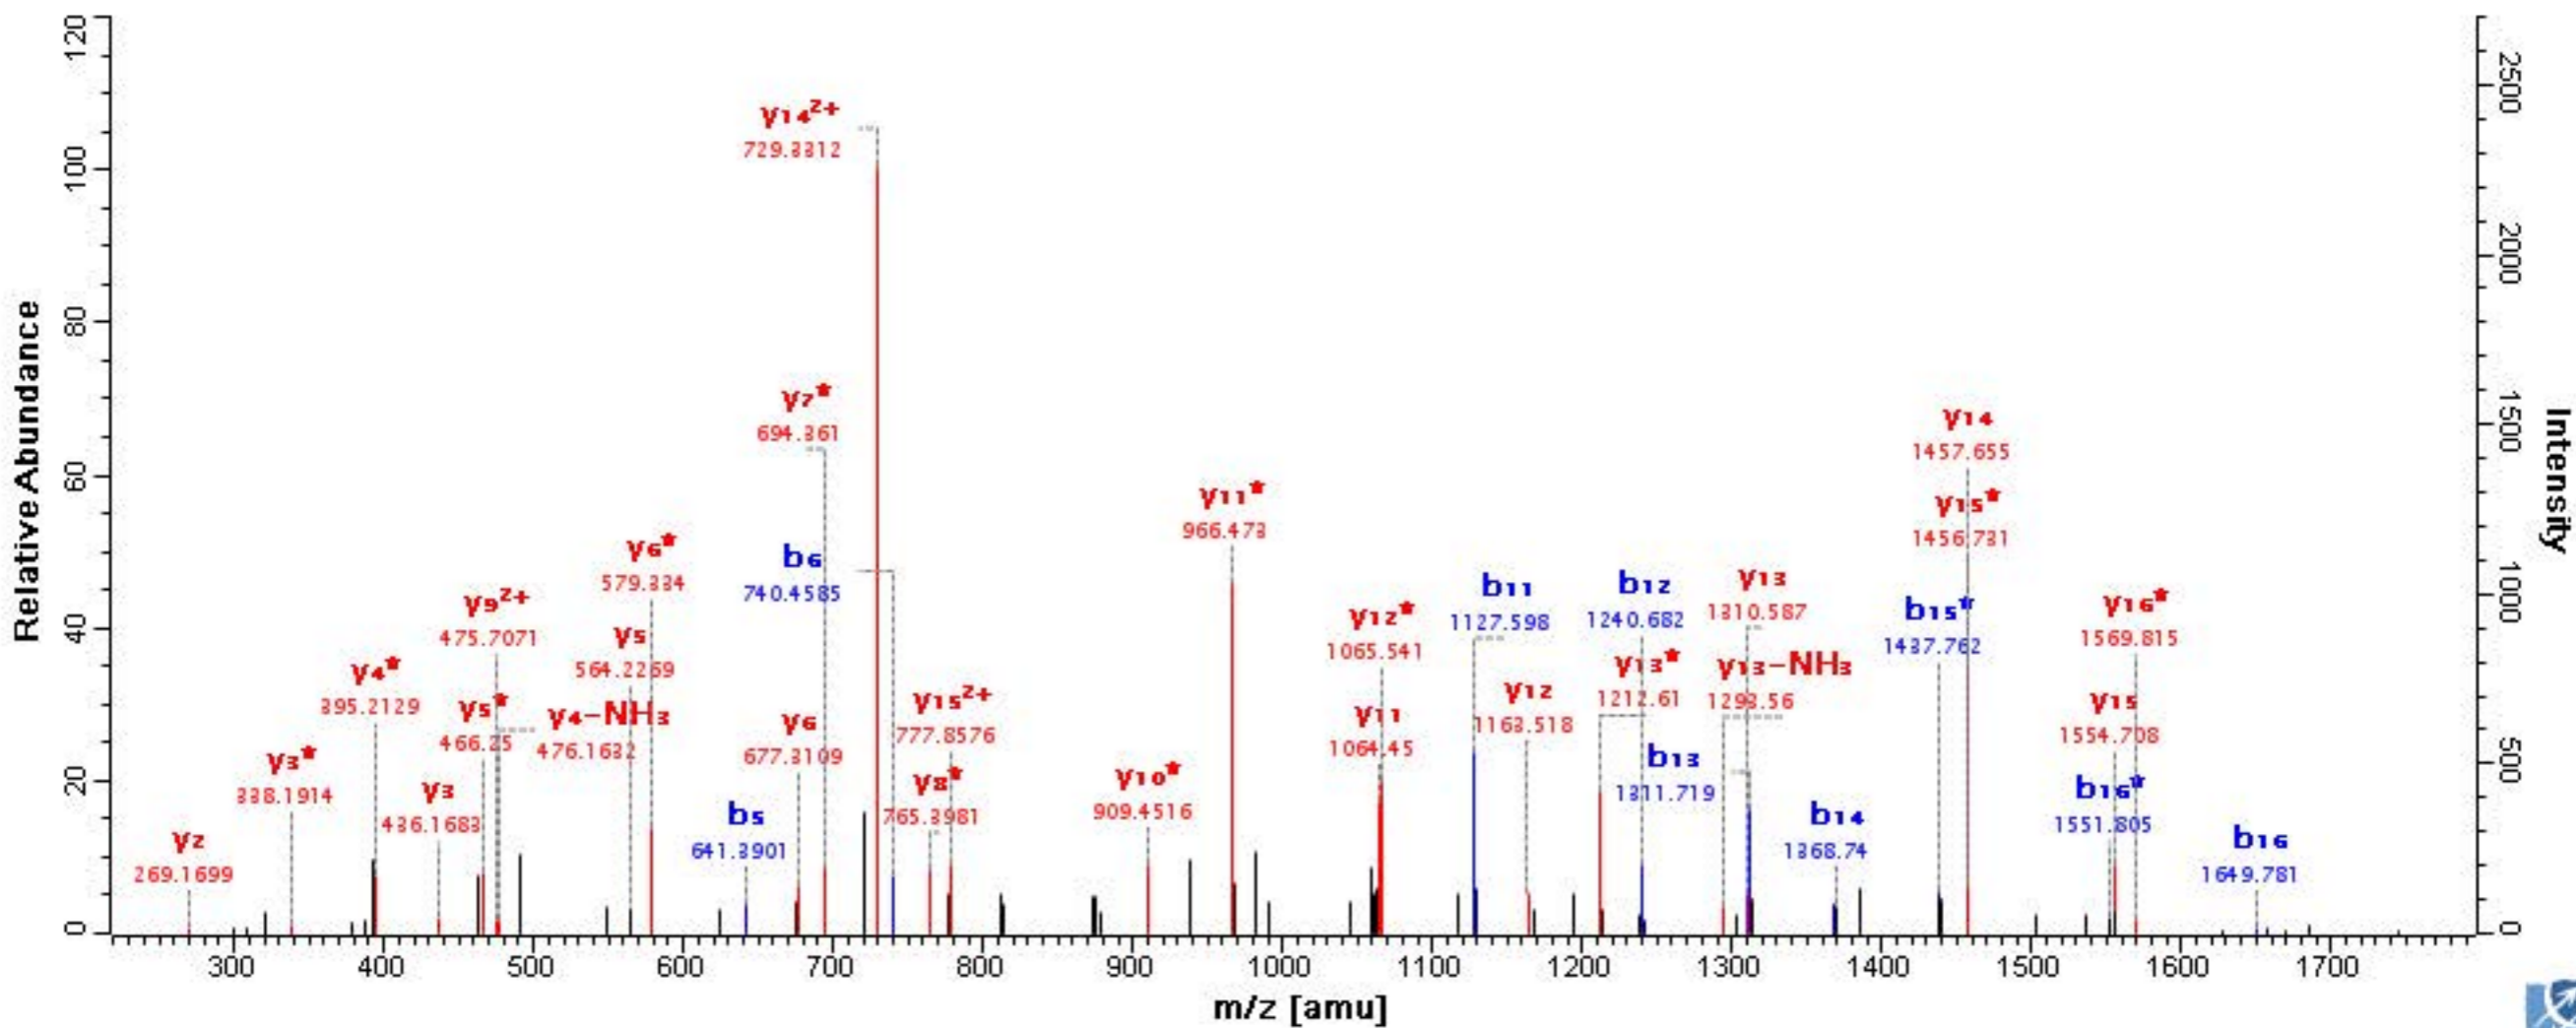

precursor information

|                   |                     |
|-------------------|---------------------|
| Mass:             | 1786.86531          |
| m/z:              | System.Collections. |
| Charge:           | System.Collections. |
| Retentiontime:    | System.Collections. |
| Score:            | 183.3578            |
| Mass Error [ppm]: | -0.10539            |
| PEP:              | 2.1354E-37          |
| Precursor Type:   | MULTI               |

| b ion      |              |    |     |    | γ ion        |            | γ <sup>2+</sup> ion |            |
|------------|--------------|----|-----|----|--------------|------------|---------------------|------------|
| Δ dalton   | mass         |    | seq |    | Δ dalton     | mass       | Δ dalton            | mass       |
|            | 137.1164383  | 1  | K   | 16 |              |            |                     |            |
|            | 250.20050228 | 2  | I   | 15 | 1667.792013  |            | 1667.792013         |            |
|            | 347.25326613 | 3  | P   | 14 | 1554.707949  | -0.0252098 | 777.85761274        | +0.1378096 |
|            | 494.32168005 | 4  | F   | 13 | 1457.6551852 | +0.2658353 | 729.33123082        | -0.4368216 |
| -0.001239  | 641.39009396 | 5  | F   | 12 | 1310.5867713 | -0.03245   | 1310.5867713        |            |
| +0.0106083 | 740.45850788 | 6  | V   | 11 | 1163.5183573 | +0.0915059 | 1163.5183573        |            |
|            | 797.4799716  | 7  | G   | 10 | 1064.4499434 | -0.1247481 | 1064.4499434        |            |
|            | 854.50143533 | 8  | G   | 9  | 1007.4284797 |            | 1007.4284797        |            |
|            | 941.53346374 | 9  | S   | 8  | 950.40701597 |            | 475.70714622        | -0.4142385 |
|            | 1012.5705775 | 10 | A   | 7  | 863.37498756 |            | 863.37498756        |            |
| -0.0591905 | 1127.5975206 | 11 | D   | 6  | 792.33787377 |            | 792.33787377        |            |
| -0.0479175 | 1240.6815845 | 12 | I   | 5  | 677.31093074 | -0.0079522 | 677.31093074        |            |
| -0.1140841 | 1311.7186983 | 13 | A   | 4  | 564.22686676 | +0.00879   | 564.22686676        |            |
| -0.0850107 | 1368.740162  | 14 | G   | 3  | 493.18975297 |            | 493.18975297        |            |
|            | 1535.7385209 | 15 | S   | 2  | 436.16828925 | +0.1382293 | 436.16828925        |            |
| +0.0504609 | 1649.7814483 | 16 | N   | 1  | 269.16993043 | -0.0275049 | 269.16993043        |            |
|            |              | 17 | K   | 0  | 155.12700298 |            | 155.12700298        |            |

general information

|                       |             |
|-----------------------|-------------|
| Annotation:           | 15 of 17    |
| AminoAcids Coverag    | 88 %        |
| Intensity Coverage:   | 65 %        |
| Protein Localisation: | 370 ... 386 |

Source: 201205213\_VR\_Bsu\_TripleSILACrep1\_pL2ESLS\_F03  
 Scannumber: 10944  
 Protein: BSU03420; comj; nin  
 Peptide Score: 158.17  
 Method: ITMS; CID; 3

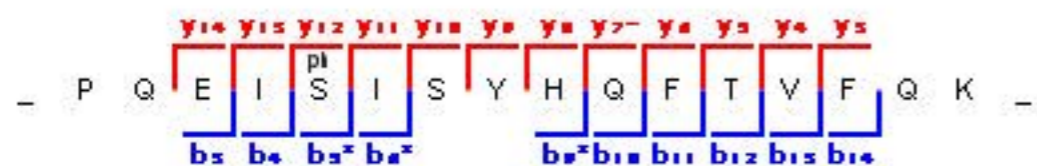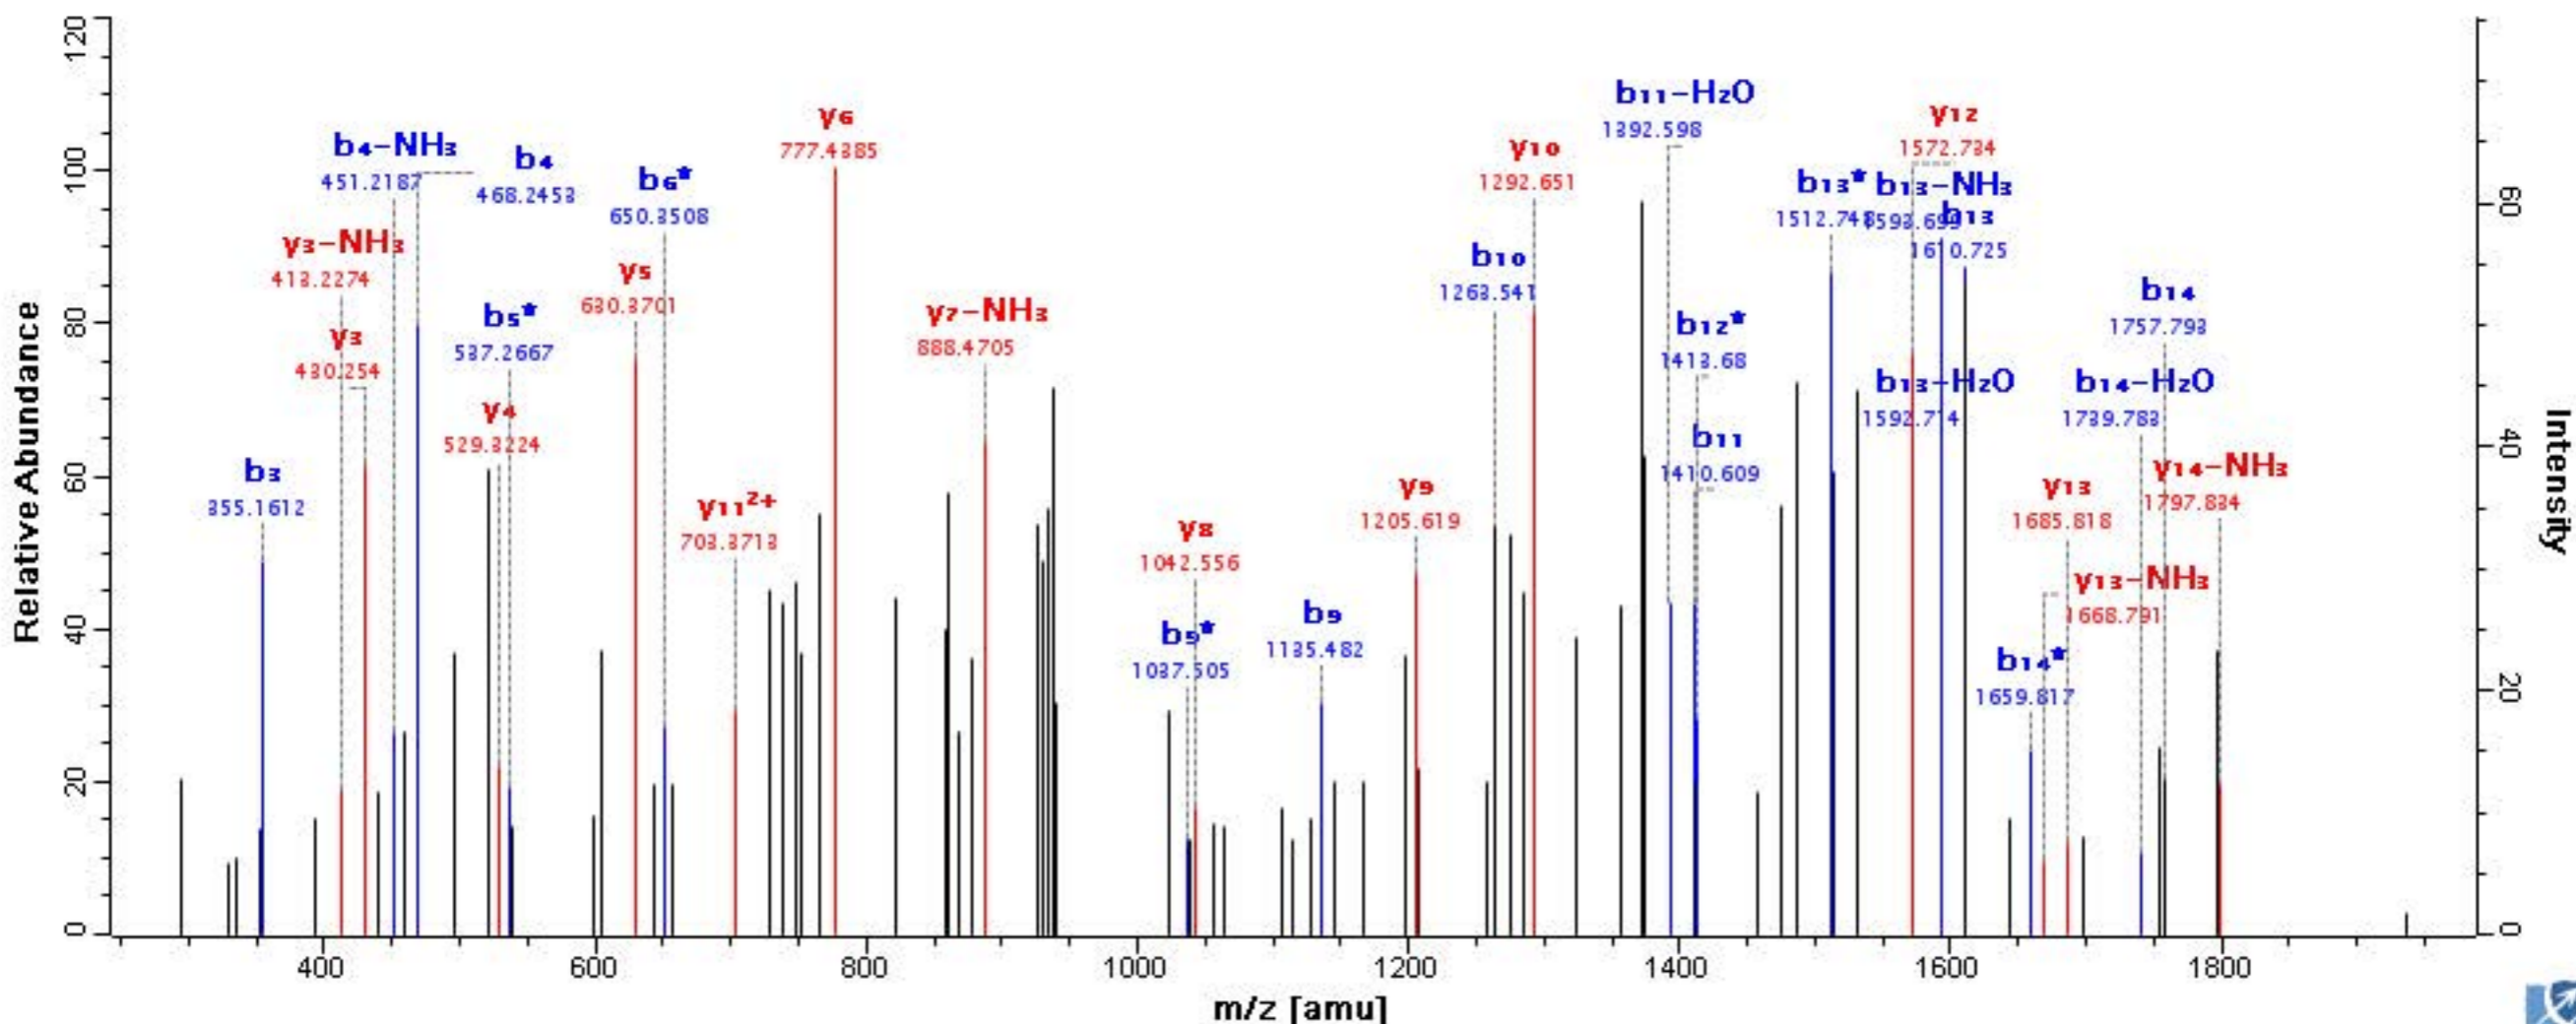

#### precursor information

|                   |                     |
|-------------------|---------------------|
| Mass:             | 2038.96491          |
| m/z:              | System.Collections. |
| Charge:           | System.Collections. |
| Retentiontime:    | System.Collections. |
| Score:            | 158.1726            |
| Mass Error [ppm]: | 0.20329             |
| PEP:              | 1.6451E-19          |
| Precursor Type:   | ISO                 |

| b ion      |              |    |     |    | gamma ion    |            | gamma <sup>2+</sup> ion |            |
|------------|--------------|----|-----|----|--------------|------------|-------------------------|------------|
| Δ dalton   | mass         |    | seq |    | Δ dalton     | mass       | Δ dalton                | mass       |
|            | 98.060040319 | 1  | P   | 15 |              |            |                         |            |
|            | 226.11861783 | 2  | Q   | 14 | 1942.9190044 |            | 1942.9190044            |            |
| -0.1854419 | 355.16121093 | 3  | E   | 13 | 1814.8604269 |            | 1814.8604269            |            |
| -0.0313772 | 468.24527491 | 4  | I   | 12 | 1685.8178338 | +0.4591437 | 1685.8178338            |            |
|            | 635.24363372 | 5  | S   | 11 | 1572.7337698 | +0.076777  | 1572.7337698            |            |
|            | 748.32769771 | 6  | I   | 10 | 1405.735411  |            | 703.37134374            | +0.2925967 |
|            | 835.35972612 | 7  | S   | 9  | 1292.651347  | -0.0075482 | 1292.651347             |            |
|            | 998.42305465 | 8  | Y   | 8  | 1205.6193186 | +0.0287527 | 1205.6193186            |            |
| +0.2035804 | 1135.4819665 | 9  | H   | 7  | 1042.5559901 | +0.1083165 | 1042.5559901            |            |
| +0.096663  | 1263.540544  | 10 | Q   | 6  | 905.49707823 |            | 905.49707823            |            |
| +0.1022237 | 1410.6089579 | 11 | F   | 5  | 777.43850072 | -0.057031  | 777.43850072            |            |
|            | 1511.6566364 | 12 | T   | 4  | 630.3700868  | -0.0345155 | 630.3700868             |            |
| -0.2108902 | 1610.7250503 | 13 | V   | 3  | 529.32240833 | +0.1194862 | 529.32240833            |            |
| -0.0471264 | 1757.7934642 | 14 | F   | 2  | 430.25399441 | -0.0616116 | 430.25399441            |            |
|            | 1885.8520418 | 15 | Q   | 1  | 283.1855805  |            | 283.1855805             |            |
|            |              | 16 | K   | 0  | 155.12700298 |            | 155.12700298            |            |

#### general information

|                       |          |
|-----------------------|----------|
| Annotation:           | 12 of 16 |
| AminoAcids Coverage:  | 75 %     |
| Intensity Coverage:   | 40 %     |
| Protein Localisation: | 7 ... 22 |

Source: 201205213\_VR\_Bsu\_TripleSILACrep1\_pL2E5LS\_F03  
 Scannumber: 10985  
 Protein: BSU17380; nrdA; nrdE  
 Peptide Score: 132.62  
 Method: ITMS; CID; 3

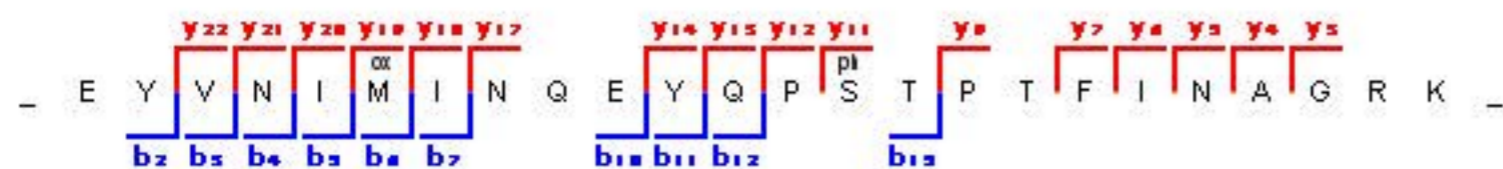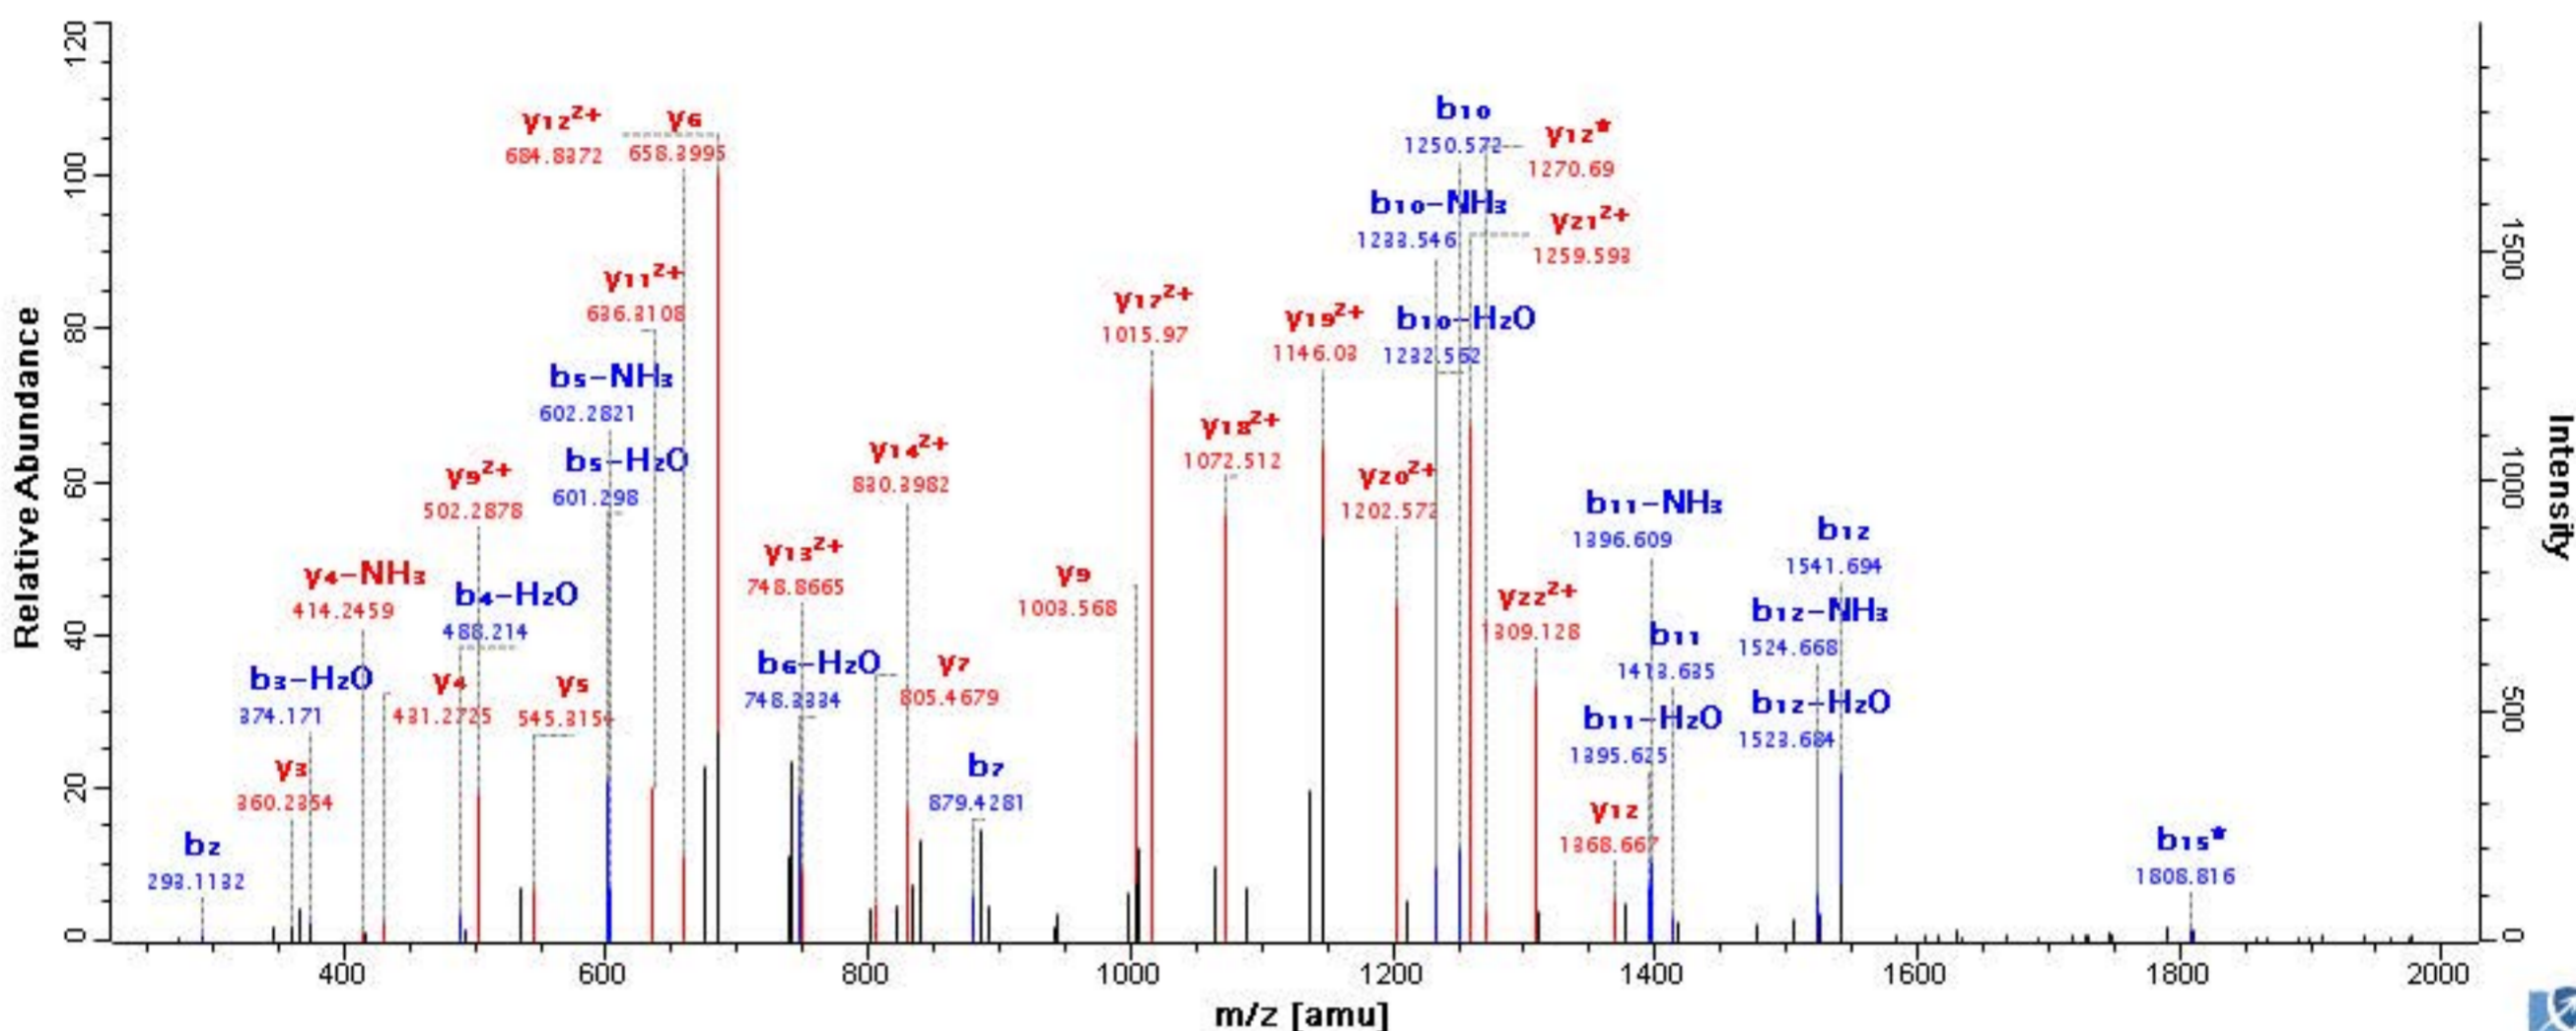

#### precursor information

|                   |                     |
|-------------------|---------------------|
| Mass:             | 2908.34911          |
| m/z:              | System.Collections. |
| Charge:           | System.Collections. |
| Retentiontime:    | System.Collections. |
| Score:            | 132.6152            |
| Mass Error [ppm]: | 0.84332             |
| PEP:              | 1.2212E-13          |
| Precursor Type:   | ISO                 |

| b ion      |              |    |     |    | y ion        |            | y <sup>2+</sup> ion |            |
|------------|--------------|----|-----|----|--------------|------------|---------------------|------------|
| Δ dalton   | mass         |    | seq |    | Δ dalton     | mass       | Δ dalton            | mass       |
|            | 130.04986956 | 1  | E   | 23 |              |            |                     |            |
| -0.3434227 | 293.1131981  | 2  | Y   | 22 | 2780.3113427 |            | 2780.3113427        |            |
|            | 392.18161202 | 3  | V   | 21 | 2617.2480142 |            | 1309.1276453        | +0.2037756 |
|            | 506.22453946 | 4  | N   | 20 | 2518.1796003 |            | 1259.5934384        | +0.242255  |
|            | 619.30860344 | 5  | I   | 19 | 2404.1366728 |            | 1202.5719746        | +0.1472636 |
|            | 766.34400267 | 6  | M   | 18 | 2291.0526088 |            | 1146.0299427        | -0.1024524 |
| -0.0212673 | 879.42806665 | 7  | I   | 17 | 2144.0172096 |            | 1072.512243         | +0.1984503 |
|            | 993.4709941  | 8  | N   | 16 | 2030.9331456 |            | 1015.970211         | +0.1926918 |
|            | 1121.5295716 | 9  | Q   | 15 | 1916.8902182 |            | 1916.8902182        |            |
| +0.4402865 | 1250.5721647 | 10 | E   | 14 | 1788.8316407 |            | 1788.8316407        |            |
| +0.0538378 | 1413.6354932 | 11 | Y   | 13 | 1659.7890476 |            | 830.39816202        | +0.2135323 |
| -0.00181   | 1541.6940708 | 12 | Q   | 12 | 1496.725719  |            | 748.86649775        | +0.3371766 |
|            | 1638.7468346 | 13 | P   | 11 | 1368.6671415 | +0.0110811 | 684.837209          | +0.0244243 |
|            | 1805.7451934 | 14 | S   | 10 | 1271.6143777 |            | 636.31082707        | -0.48081   |
|            | 1906.7928719 | 15 | T   | 9  | 1104.6160189 |            | 1104.6160189        |            |
|            | 2003.8456358 | 16 | P   | 8  | 1003.5683404 | -0.0510674 | 502.28780842        | +0.0840177 |
|            | 2104.8933142 | 17 | T   | 7  | 906.51557653 |            | 906.51557653        |            |
|            | 2251.9617281 | 18 | F   | 6  | 805.46789805 | +0.1553319 | 805.46789805        |            |
|            | 2365.0457921 | 19 | I   | 5  | 658.39948414 | +0.0267244 | 658.39948414        |            |
|            | 2479.0887196 | 20 | N   | 4  | 545.31542016 | +0.0073948 | 545.31542016        |            |
|            | 2550.1258334 | 21 | A   | 3  | 431.27249271 | -0.0494092 | 431.27249271        |            |
|            | 2607.1472971 | 22 | G   | 2  | 360.23537892 | -0.0174224 | 360.23537892        |            |
|            | 2763.2484081 | 23 | R   | 1  | 303.2139152  |            | 303.2139152         |            |
|            |              | 24 | K   | 0  | 147.11280417 |            | 147.11280417        |            |

#### general information

|                       |             |
|-----------------------|-------------|
| Annotation:           | 19 of 24    |
| AminoAcids Coverag    | 79 %        |
| Intensity Coverage:   | 68 %        |
| Protein Localisation: | 139 ... 162 |

Source: 201205213\_VR\_Bsu\_TripleSILACrep1\_pL2ESLS\_F03  
 Scannumber: 13276  
 Protein: BSU15430; ile5  
 Peptide Score: 117.79  
 Method: ITMS; CID; 3

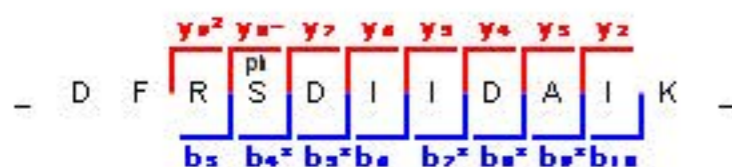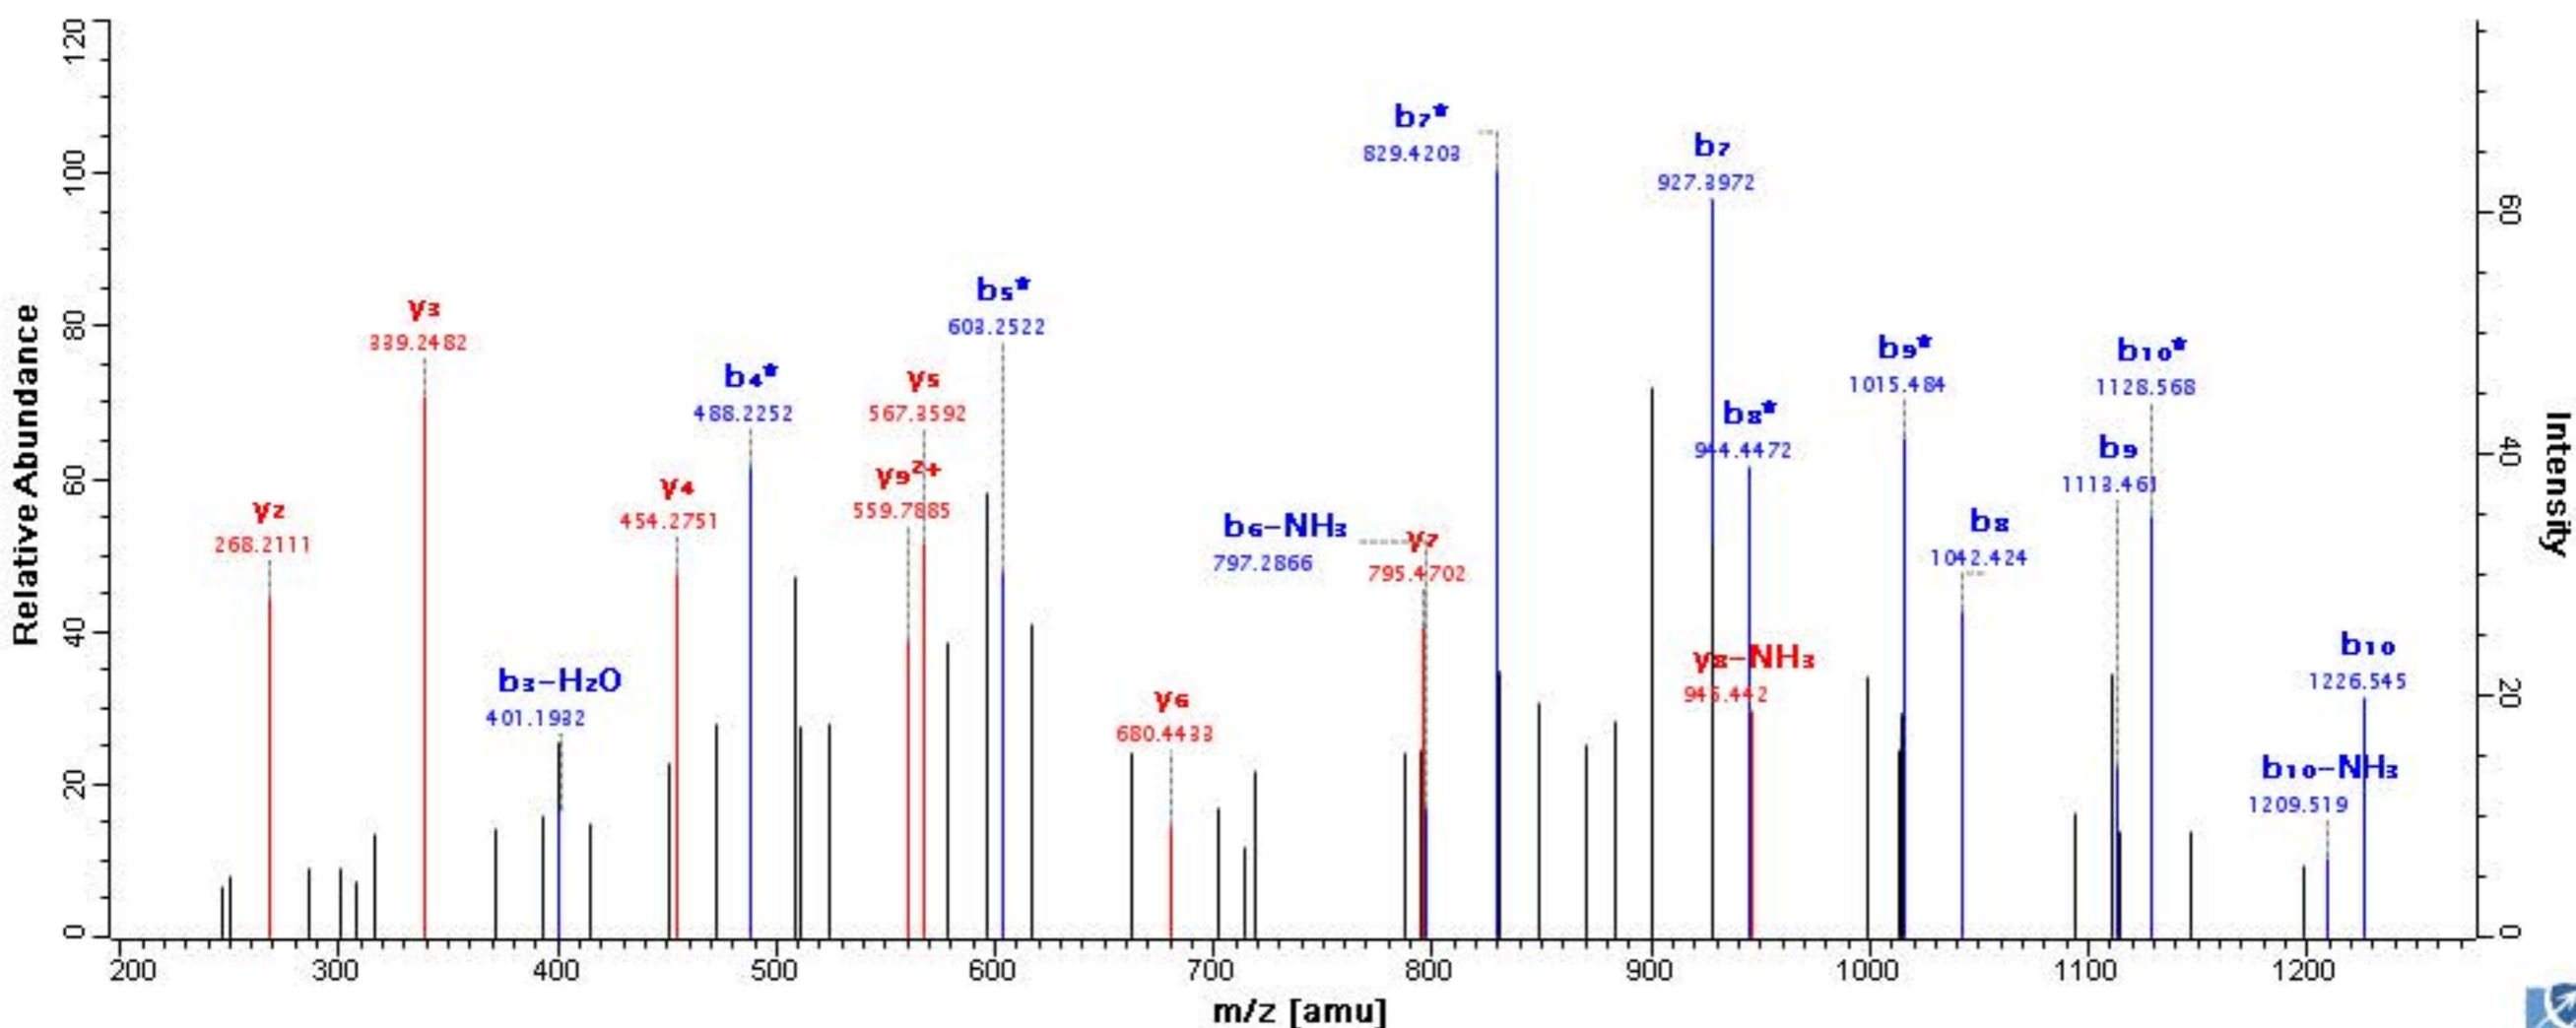

**precursor information**

|                   |                     |
|-------------------|---------------------|
| Mass:             | 1371.64382          |
| m/z:              | System.Collections. |
| Charge:           | System.Collections. |
| Retentiontime:    | System.Collections. |
| Score:            | 117.7924            |
| Mass Error [ppm]: | 0.1969              |
| PEP:              | 8.2176E-06          |
| Precursor Type:   | MULTI               |

**general information**

|                       |             |
|-----------------------|-------------|
| Annotation:           | 8 of 11     |
| AminoAcids Coverage:  | 73 %        |
| Intensity Coverage:   | 50 %        |
| Protein Localisation: | 417 ... 427 |

| b ion      |              |     |   | γ ion    |              | γ <sup>2+</sup> ion |                         |
|------------|--------------|-----|---|----------|--------------|---------------------|-------------------------|
| Δ dalton   | mass         | seq |   | Δ dalton | mass         | Δ dalton            | mass                    |
|            | 116.0342195  | 1   | D | 10       |              |                     |                         |
|            | 263.10263341 | 2   | F | 9        | 1265.6380785 |                     | 1265.6380785            |
|            | 419.20374444 | 3   | R | 8        | 1118.5696646 |                     | 559.78847054 -0.0310853 |
|            | 586.20210326 | 4   | S | 7        | 962.4685536  |                     | 962.4685536             |
|            | 701.22904629 | 5   | D | 6        | 795.47019478 | -0.0706586          | 795.47019478            |
|            | 814.31311027 | 6   | I | 5        | 680.44325174 | +0.0072487          | 680.44325174            |
| +0.1020933 | 927.39717425 | 7   | I | 4        | 567.35918776 | -0.0253255          | 567.35918776            |
| -0.0731651 | 1042.4241173 | 8   | D | 3        | 454.27512378 | +0.1472395          | 454.27512378            |
| -0.344776  | 1113.4612311 | 9   | A | 2        | 339.24818075 | +0.0094486          | 339.24818075            |
| +0.0358817 | 1226.5452951 | 10  | I | 1        | 268.21106696 | +0.105736           | 268.21106696            |
|            |              | 11  | K | 0        | 155.12700298 |                     | 155.12700298            |

Source: 201205213\_VR\_Bsu\_TripleSILACrep1\_pL2ESLS\_FD3  
 Scannumber: 13633  
 Protein: BSU38110; ipa-43d; nfrA; nfrA1; ywcG  
 Peptide Score: 86.3  
 Method: ITMS; CID; 3

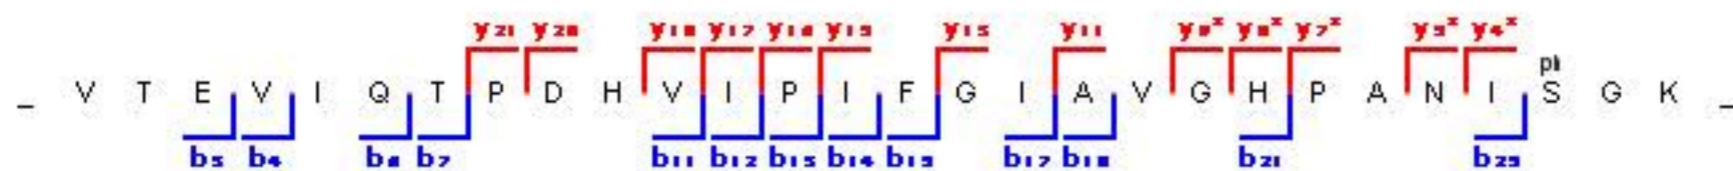

Source: 201205213\_VR\_Bsu\_TripleSILACrep1\_pL2ESLS\_F03  
 Scannumber: 2470  
 Protein: BSU01130; tuf; tufA  
 Peptide Score: 128.36  
 Method: ITMS; CID; 3

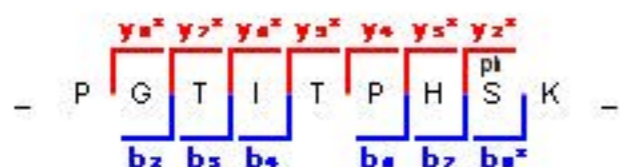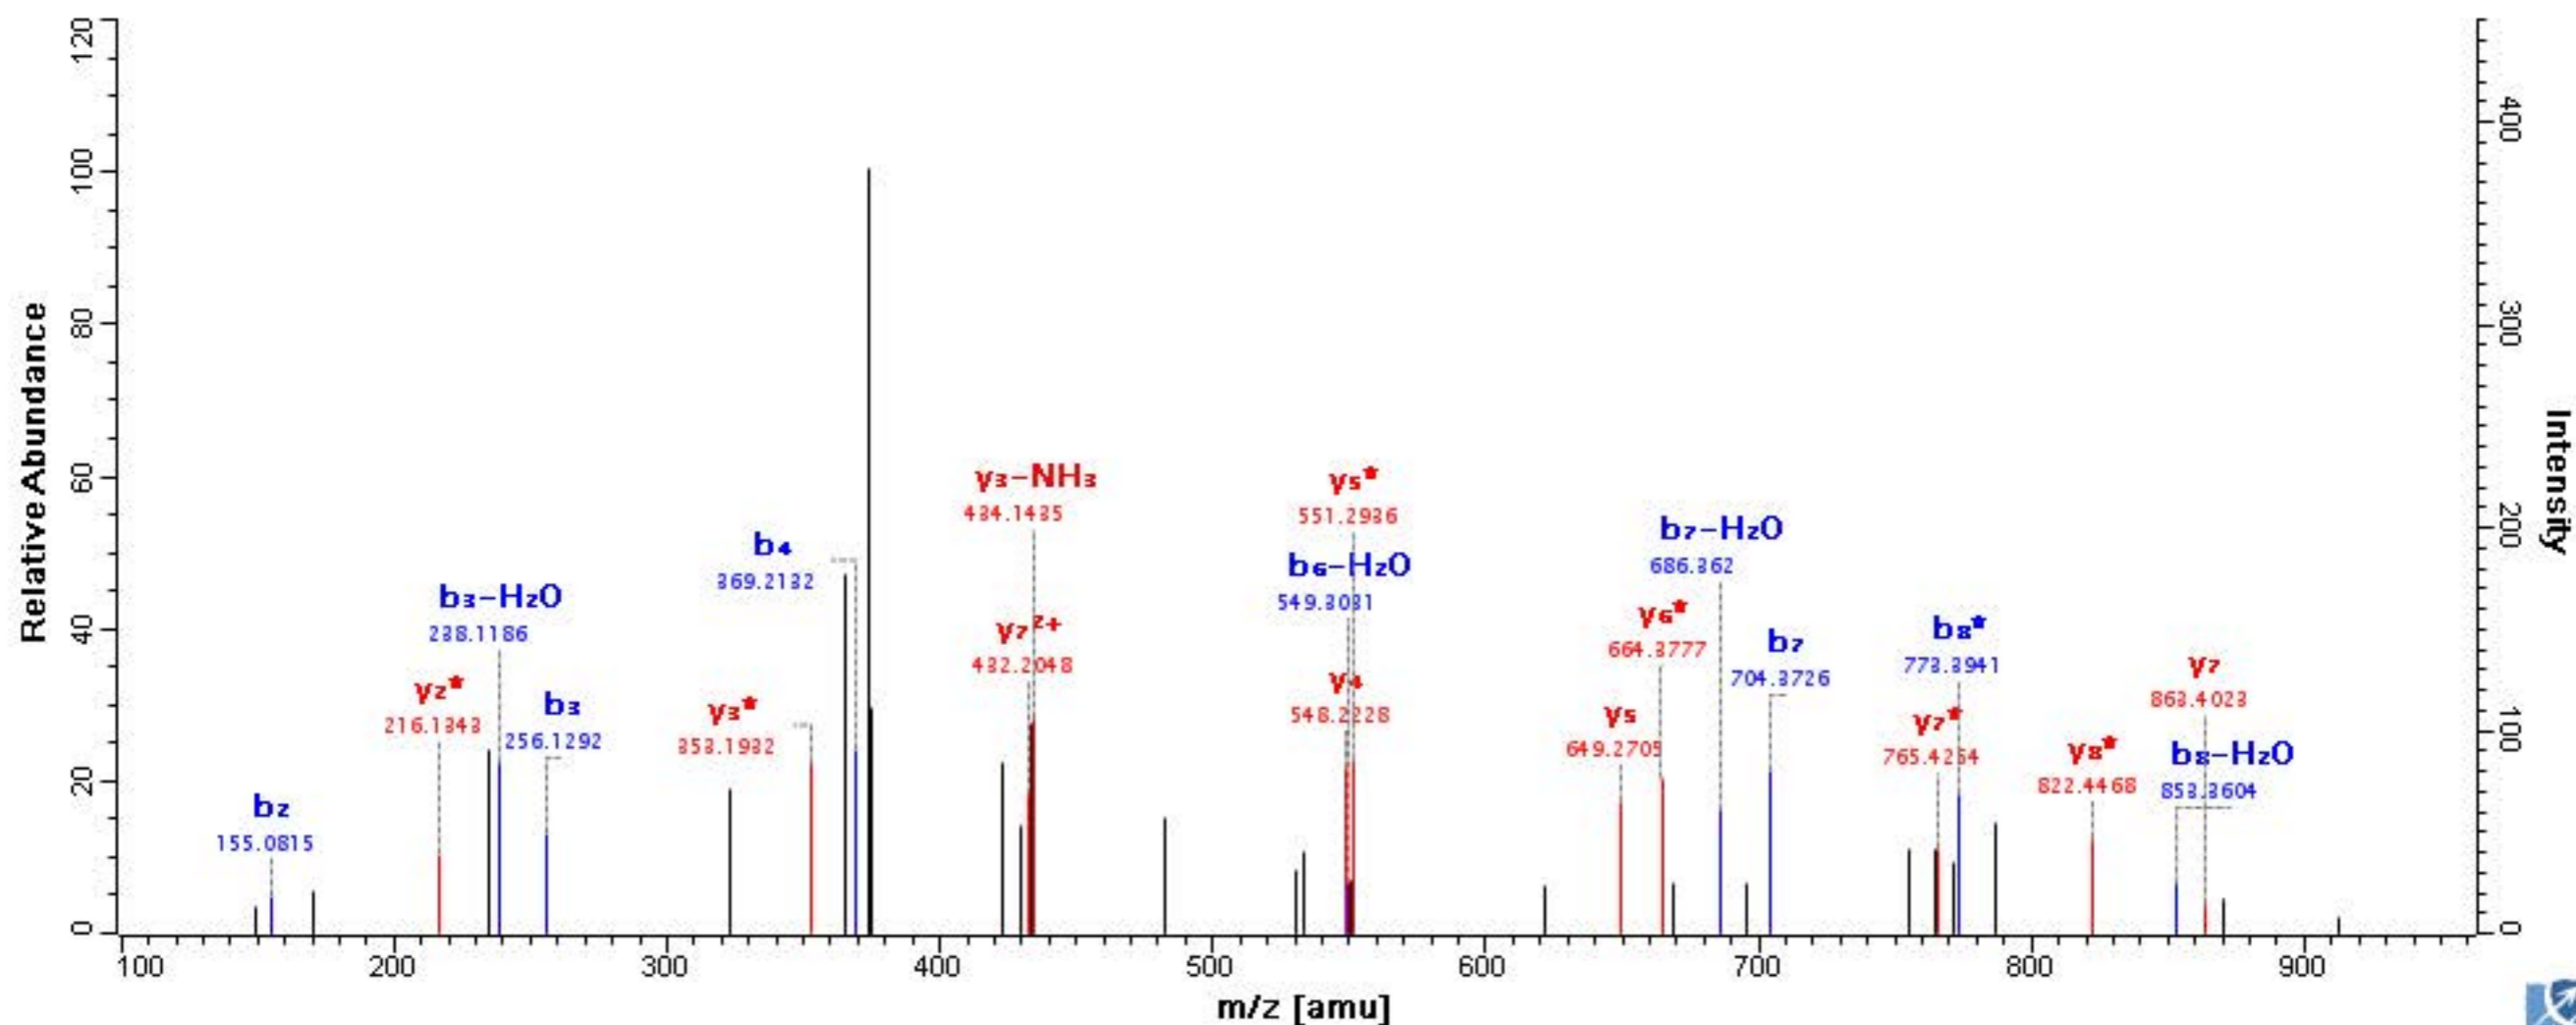

#### precursor information

|                       |                     |
|-----------------------|---------------------|
| Mass:                 | 1016.46876          |
| m/z:                  | System.Collections. |
| Charge:               | System.Collections. |
| Retentiontime:        | System.Collections. |
| Score:                | 128.3611            |
| Mass Error [ppm]:     | -0.44033            |
| PEP:                  | 7.8389E-08          |
| g Precursor Type:     | ISO                 |
| Annotation:           | 7 of 9              |
| AminoAcids Coverag    | 78 %                |
| Intensity Coverage:   | 44 %                |
| Protein Localisation: | 298 ... 306         |

| b ion      |              |   |     |   | gamma ion    |            | gamma <sup>2+</sup> ion |            |
|------------|--------------|---|-----|---|--------------|------------|-------------------------|------------|
| Δ dalton   | mass         |   | seq |   | Δ dalton     | mass       | Δ dalton                | mass       |
|            | 98.060040319 | 1 | P   | 8 |              |            |                         |            |
| +0.1636131 | 155.08150404 | 2 | G   | 7 | 920.42372336 |            | 920.42372336            |            |
| -0.0377824 | 256.12918252 | 3 | T   | 6 | 863.40225963 | -0.0040663 | 432.20476805            | -0.0477856 |
| +0.001231  | 369.2132465  | 4 | I   | 5 | 762.35458116 |            | 762.35458116            |            |
|            | 470.26092497 | 5 | T   | 4 | 649.27051718 | +0.071768  | 649.27051718            |            |
|            | 567.31368882 | 6 | P   | 3 | 548.2228387  | +0.0426642 | 548.2228387             |            |
| +0.0337103 | 704.37260069 | 7 | H   | 2 | 451.17007485 |            | 451.17007485            |            |
|            | 871.3709595  | 8 | S   | 1 | 314.11116299 |            | 314.11116299            |            |
|            |              | 9 | K   | 0 | 147.11280417 |            | 147.11280417            |            |

Source: 201205213\_VR\_Bsu\_TripleSILACrep1\_pL2ESLS\_F03  
 Scannumber: 2829  
 Protein: BSU02400; ybgF  
 Peptide Score: 87.18  
 Method: ITMS; CID; 3

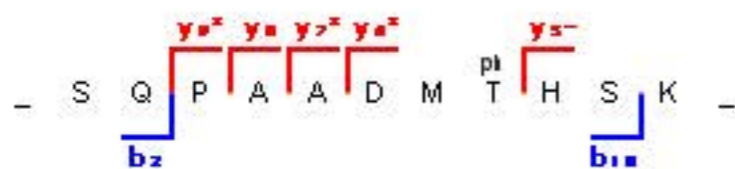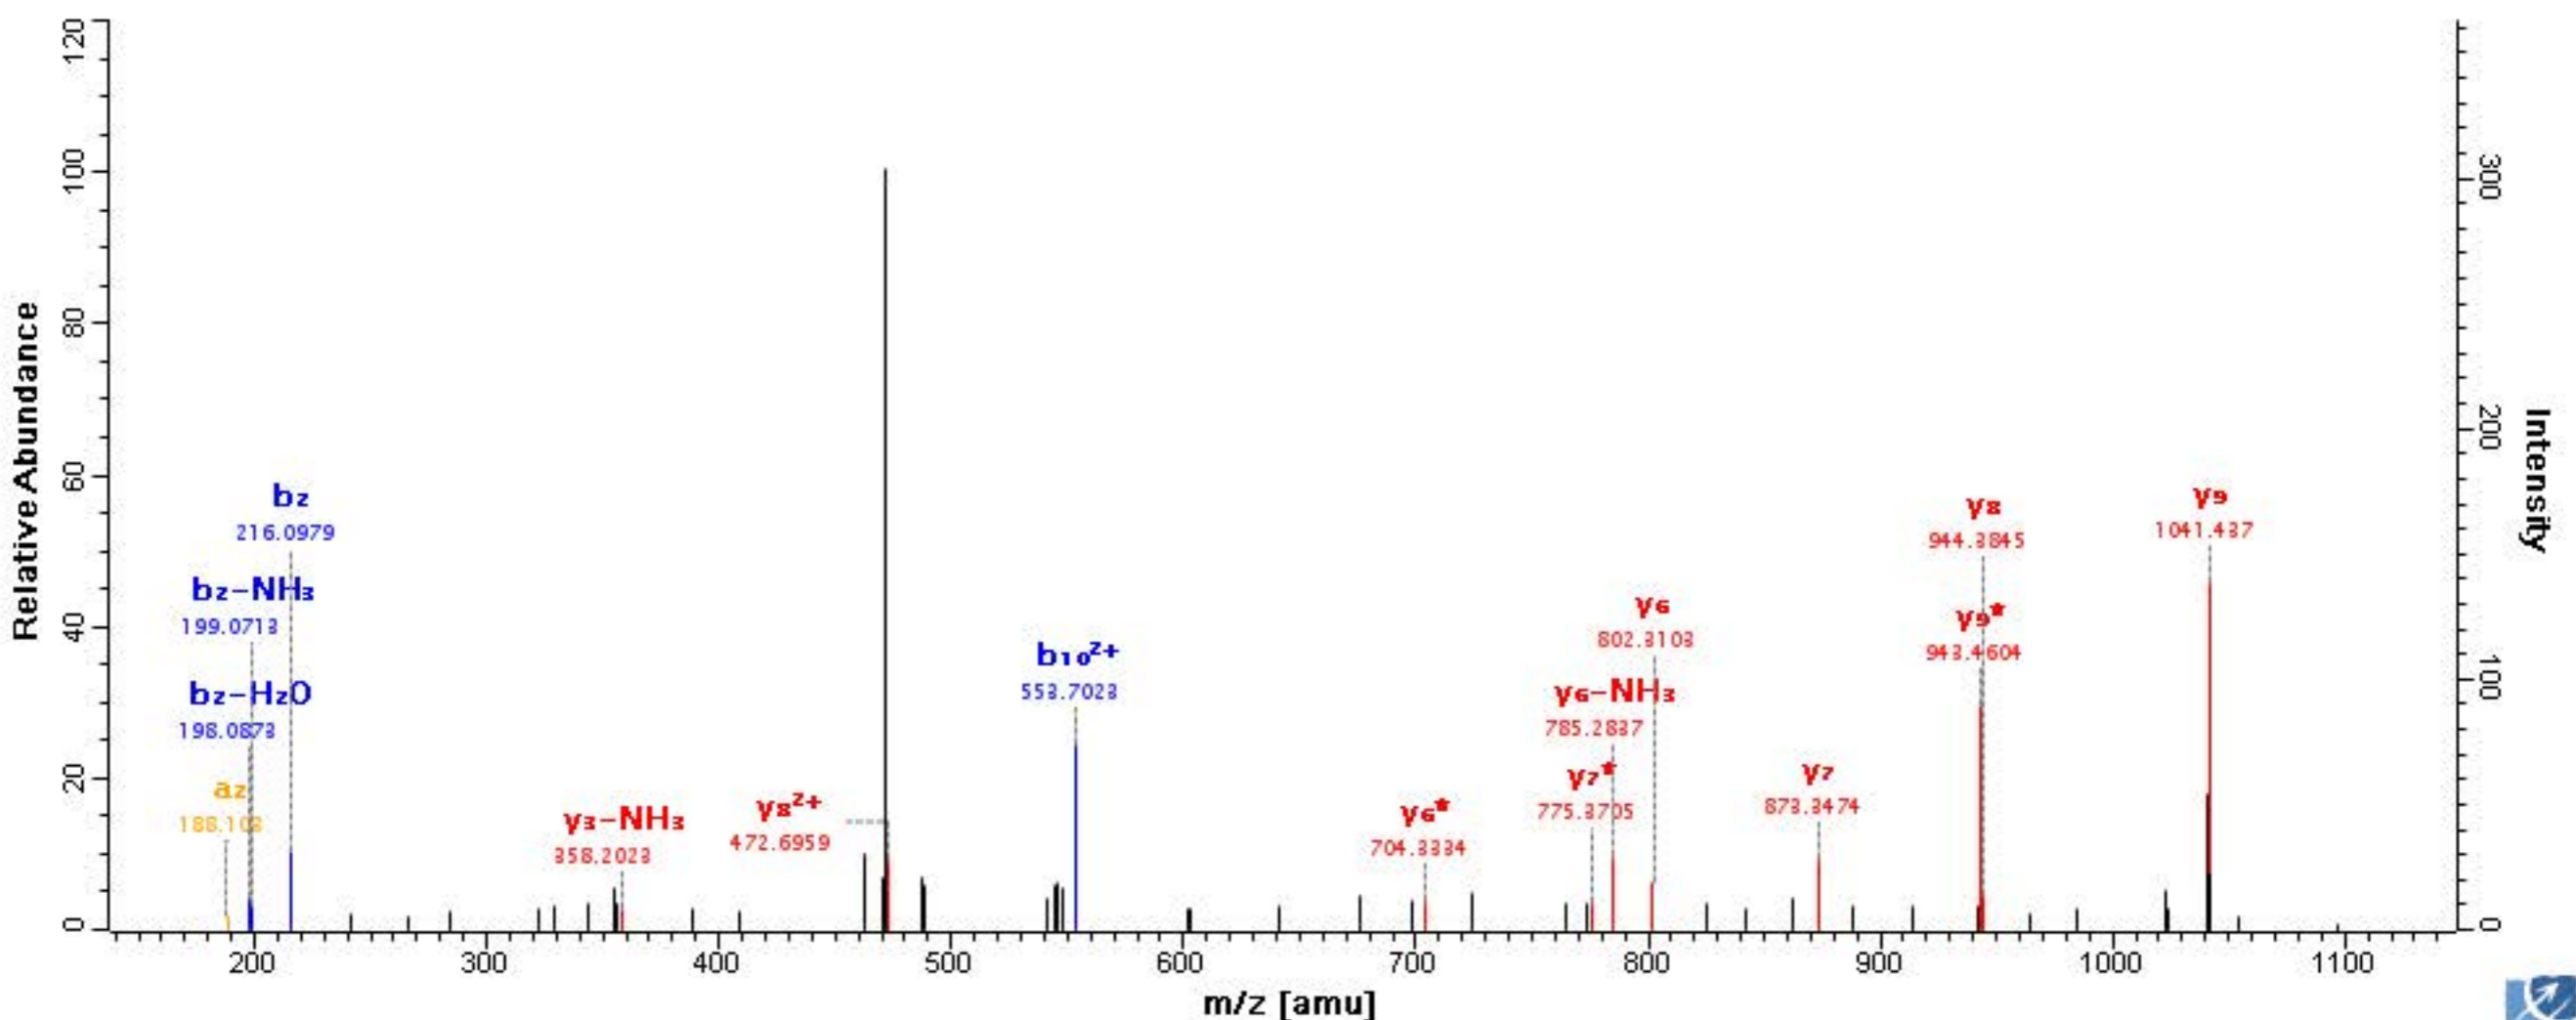

**precursor information**

|                   |                     |
|-------------------|---------------------|
| Mass:             | 1251.49478          |
| m/z:              | System.Collections. |
| Charge:           | System.Collections. |
| Retentiontime:    | System.Collections. |
| Score:            | 87.18431            |
| Mass Error [ppm]: | -0.5766             |
| PEP:              | 0.0032713           |
| Precursor Type:   | MULTI               |

**general information**

|                       |             |
|-----------------------|-------------|
| Annotation:           | 7 of 11     |
| AminoAcids Coverage:  | 64 %        |
| Intensity Coverage:   | 38 %        |
| Protein Localisation: | 460 ... 470 |

| a ion    |         | b <sup>2+</sup> ion |         | b ion    |         |    |     |    | y ion    |          | y <sup>2+</sup> ion |          |
|----------|---------|---------------------|---------|----------|---------|----|-----|----|----------|----------|---------------------|----------|
| Δ dalton | mass    | Δ dalton            | mass    | Δ dalton | mass    |    | seq |    | Δ dalton | mass     | Δ dalton            | mass     |
|          | 60.0444 |                     | 88.0393 |          | 88.0393 | 1  | S   | 10 |          |          |                     |          |
| +0.10457 | 188.103 |                     | 216.098 | +0.00408 | 216.098 | 2  | Q   | 9  | 1169.5   |          | 1169.5              |          |
|          | 285.156 |                     | 313.151 |          | 313.151 | 3  | P   | 8  | 1041.44  | +0.15818 | 1041.44             |          |
|          | 356.193 |                     | 384.188 |          | 384.188 | 4  | A   | 7  | 944.385  | +0.20844 | 472.696             | +0.21328 |
|          | 427.23  |                     | 455.225 |          | 455.225 | 5  | A   | 6  | 873.347  | +0.00703 | 873.347             |          |
|          | 542.257 |                     | 570.252 |          | 570.252 | 6  | D   | 5  | 802.31   | -0.2735  | 802.31              |          |
|          | 673.297 |                     | 701.292 |          | 701.292 | 7  | M   | 4  | 687.283  |          | 687.283             |          |
|          | 854.311 |                     | 882.306 |          | 882.306 | 8  | T   | 3  | 556.243  |          | 556.243             |          |
|          | 991.37  |                     | 1019.37 |          | 1019.37 | 9  | H   | 2  | 375.229  |          | 375.229             |          |
|          | 1078.4  | -0.4795             | 553.702 |          | 1106.4  | 10 | S   | 1  | 238.17   |          | 238.17              |          |
|          |         |                     |         |          |         | 11 | K   | 0  | 151.138  |          | 151.138             |          |

Source: 201205213\_VR\_Bsu\_TripleSILACrep1\_pL2ESLS\_F03  
 Scannumber: 3402  
 Protein: BSU28290; ilvC  
 Peptide Score: 145.28  
 Method: ITMS; CID; 3

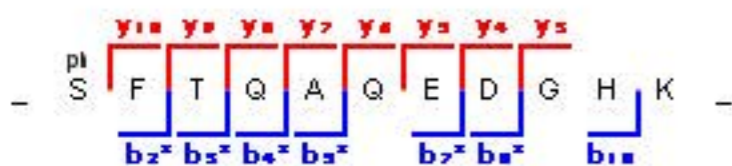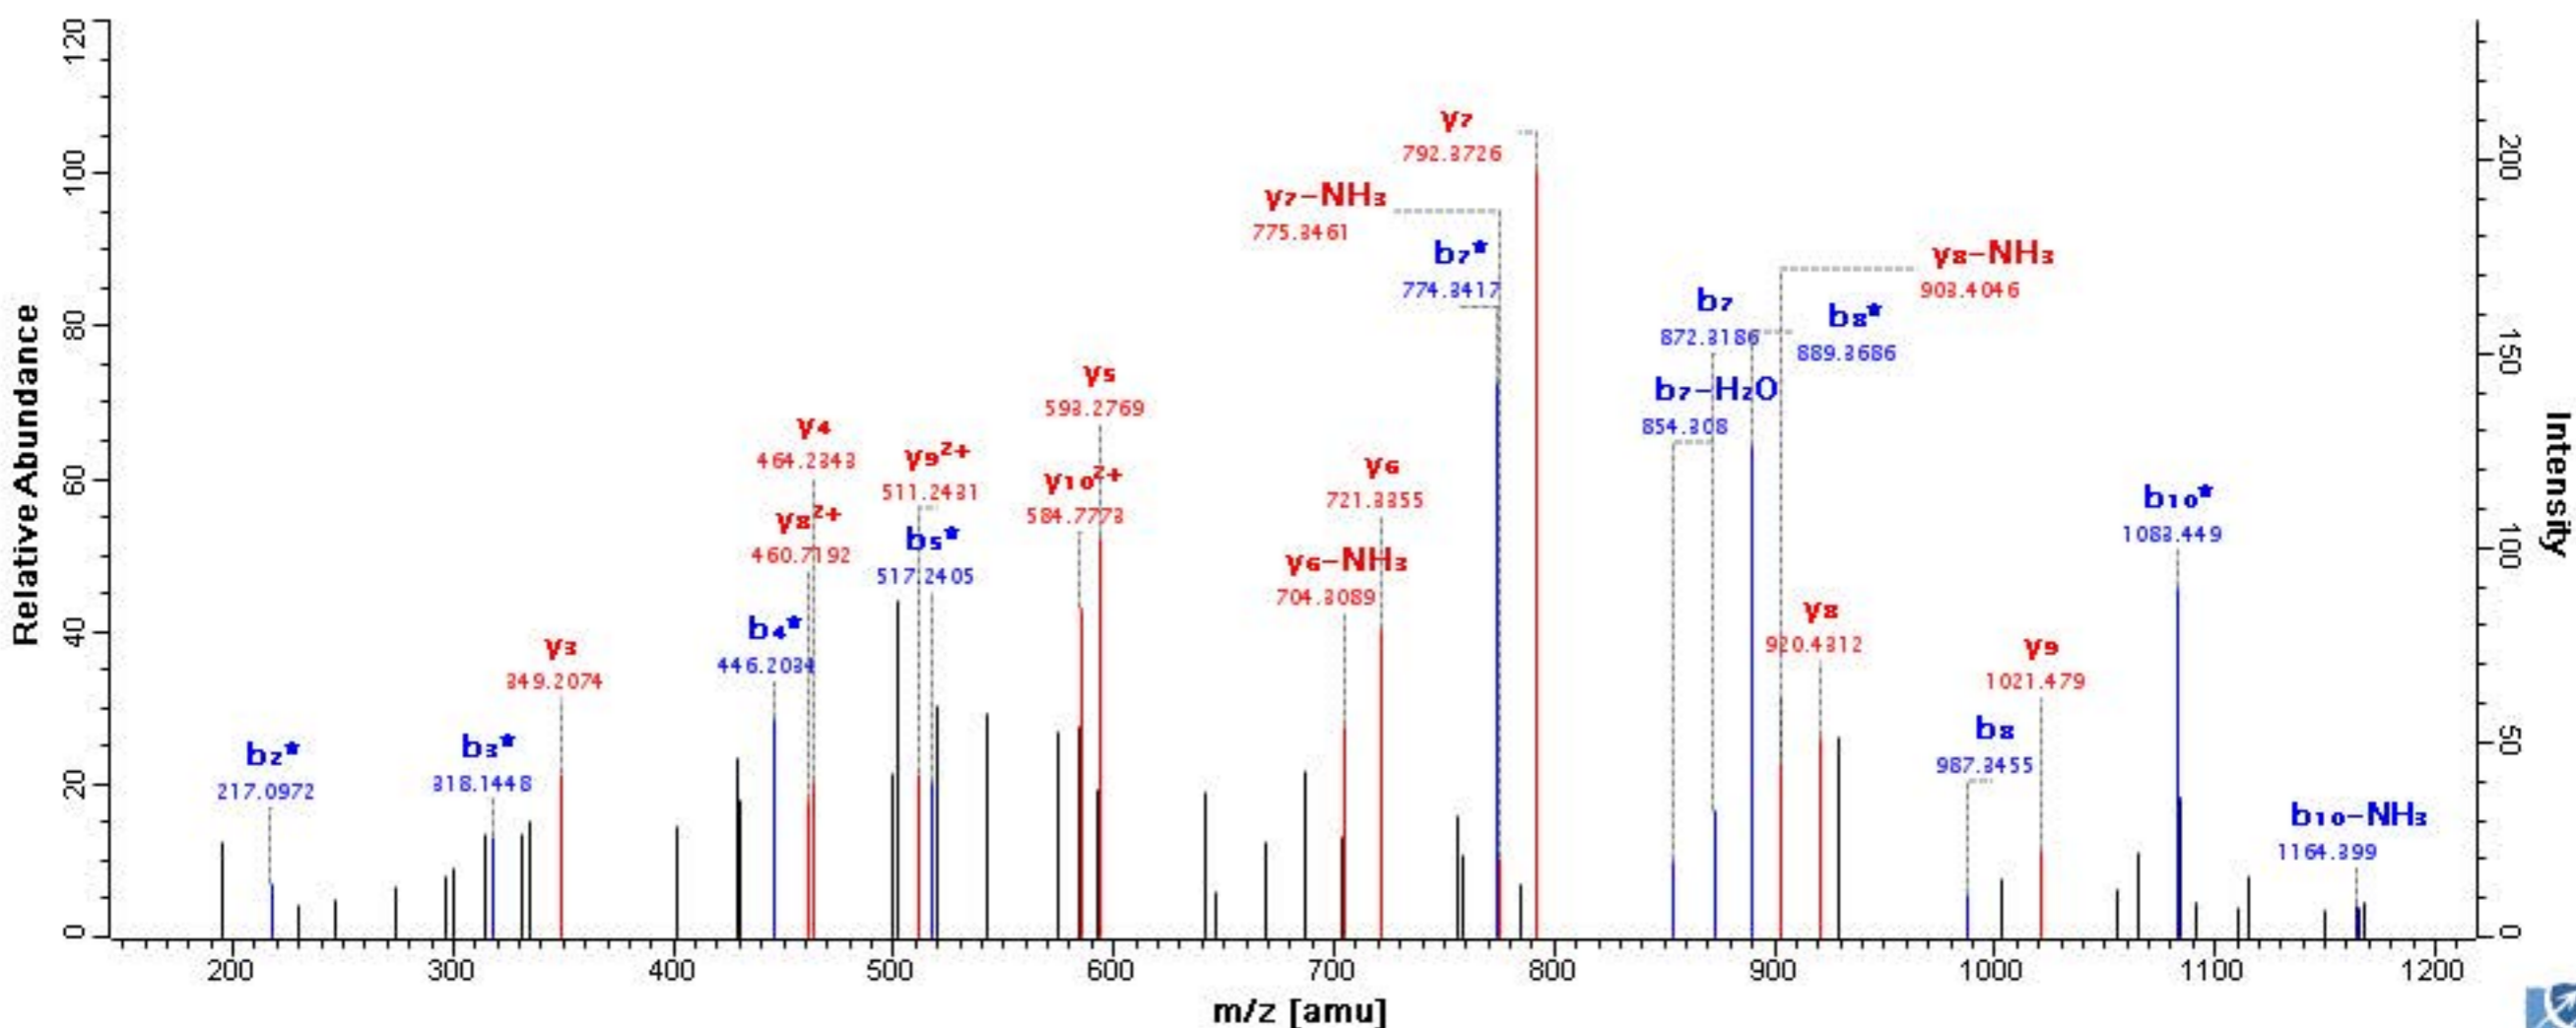

**precursor information**

|                   |                     |
|-------------------|---------------------|
| Mass:             | 1326.52405          |
| m/z:              | System.Collections. |
| Charge:           | System.Collections. |
| Retentiontime:    | System.Collections. |
| Score:            | 145.2753            |
| Mass Error [ppm]: | -0.084509           |
| PEP:              | 1.7785E-11          |
| Precursor Type:   | MULTI               |

**general information**

|                       |           |
|-----------------------|-----------|
| Annotation:           | 9 of 11   |
| AminoAcids Coverage:  | 82 %      |
| Intensity Coverage:   | 55 %      |
| Protein Localisation: | 52 ... 62 |

| b ion      |              |    |     |    | y ion        |            | y <sup>2+</sup> ion |            |
|------------|--------------|----|-----|----|--------------|------------|---------------------|------------|
| Δ dalton   | mass         |    | seq |    | Δ dalton     | mass       | Δ dalton            | mass       |
|            | 168.00563528 | 1  | S   | 10 |              |            |                     |            |
|            | 315.0740492  | 2  | F   | 9  | 1168.5472759 |            | 584.77727618        | +0.1612614 |
|            | 416.12172768 | 3  | T   | 8  | 1021.478862  | -0.0364181 | 511.24306922        | -0.0859037 |
|            | 544.18030519 | 4  | Q   | 7  | 920.43118351 | +0.0724176 | 460.71922999        | +0.105477  |
|            | 615.21741897 | 5  | A   | 6  | 792.372606   | -0.0834825 | 792.372606          |            |
|            | 743.27599649 | 6  | Q   | 5  | 721.33549221 | +0.0180234 | 721.33549221        |            |
| +0.2642351 | 872.31858958 | 7  | E   | 4  | 593.2769147  | -0.0896588 | 593.2769147         |            |
| +0.1593502 | 987.34553261 | 8  | D   | 3  | 464.2343216  | +0.0100632 | 464.2343216         |            |
|            | 1044.3669963 | 9  | G   | 2  | 349.20737857 | +0.007221  | 349.20737857        |            |
|            | 1181.4259082 | 10 | H   | 1  | 292.18591485 |            | 292.18591485        |            |
|            |              | 11 | K   | 0  | 155.12700298 |            | 155.12700298        |            |



Source: 201205213\_VR\_Bsu\_TripleSILACrep1\_pL2ESLS\_F03  
 Scannumber: 4048  
 Protein: BSU22880; jofD; ypfD  
 Peptide Score: 89.4  
 Method: ITMS; CID; 3

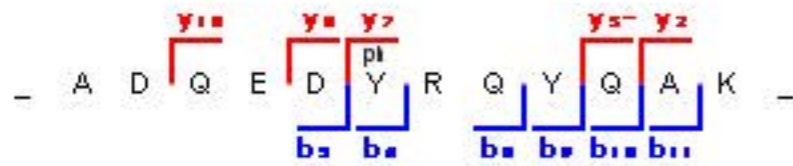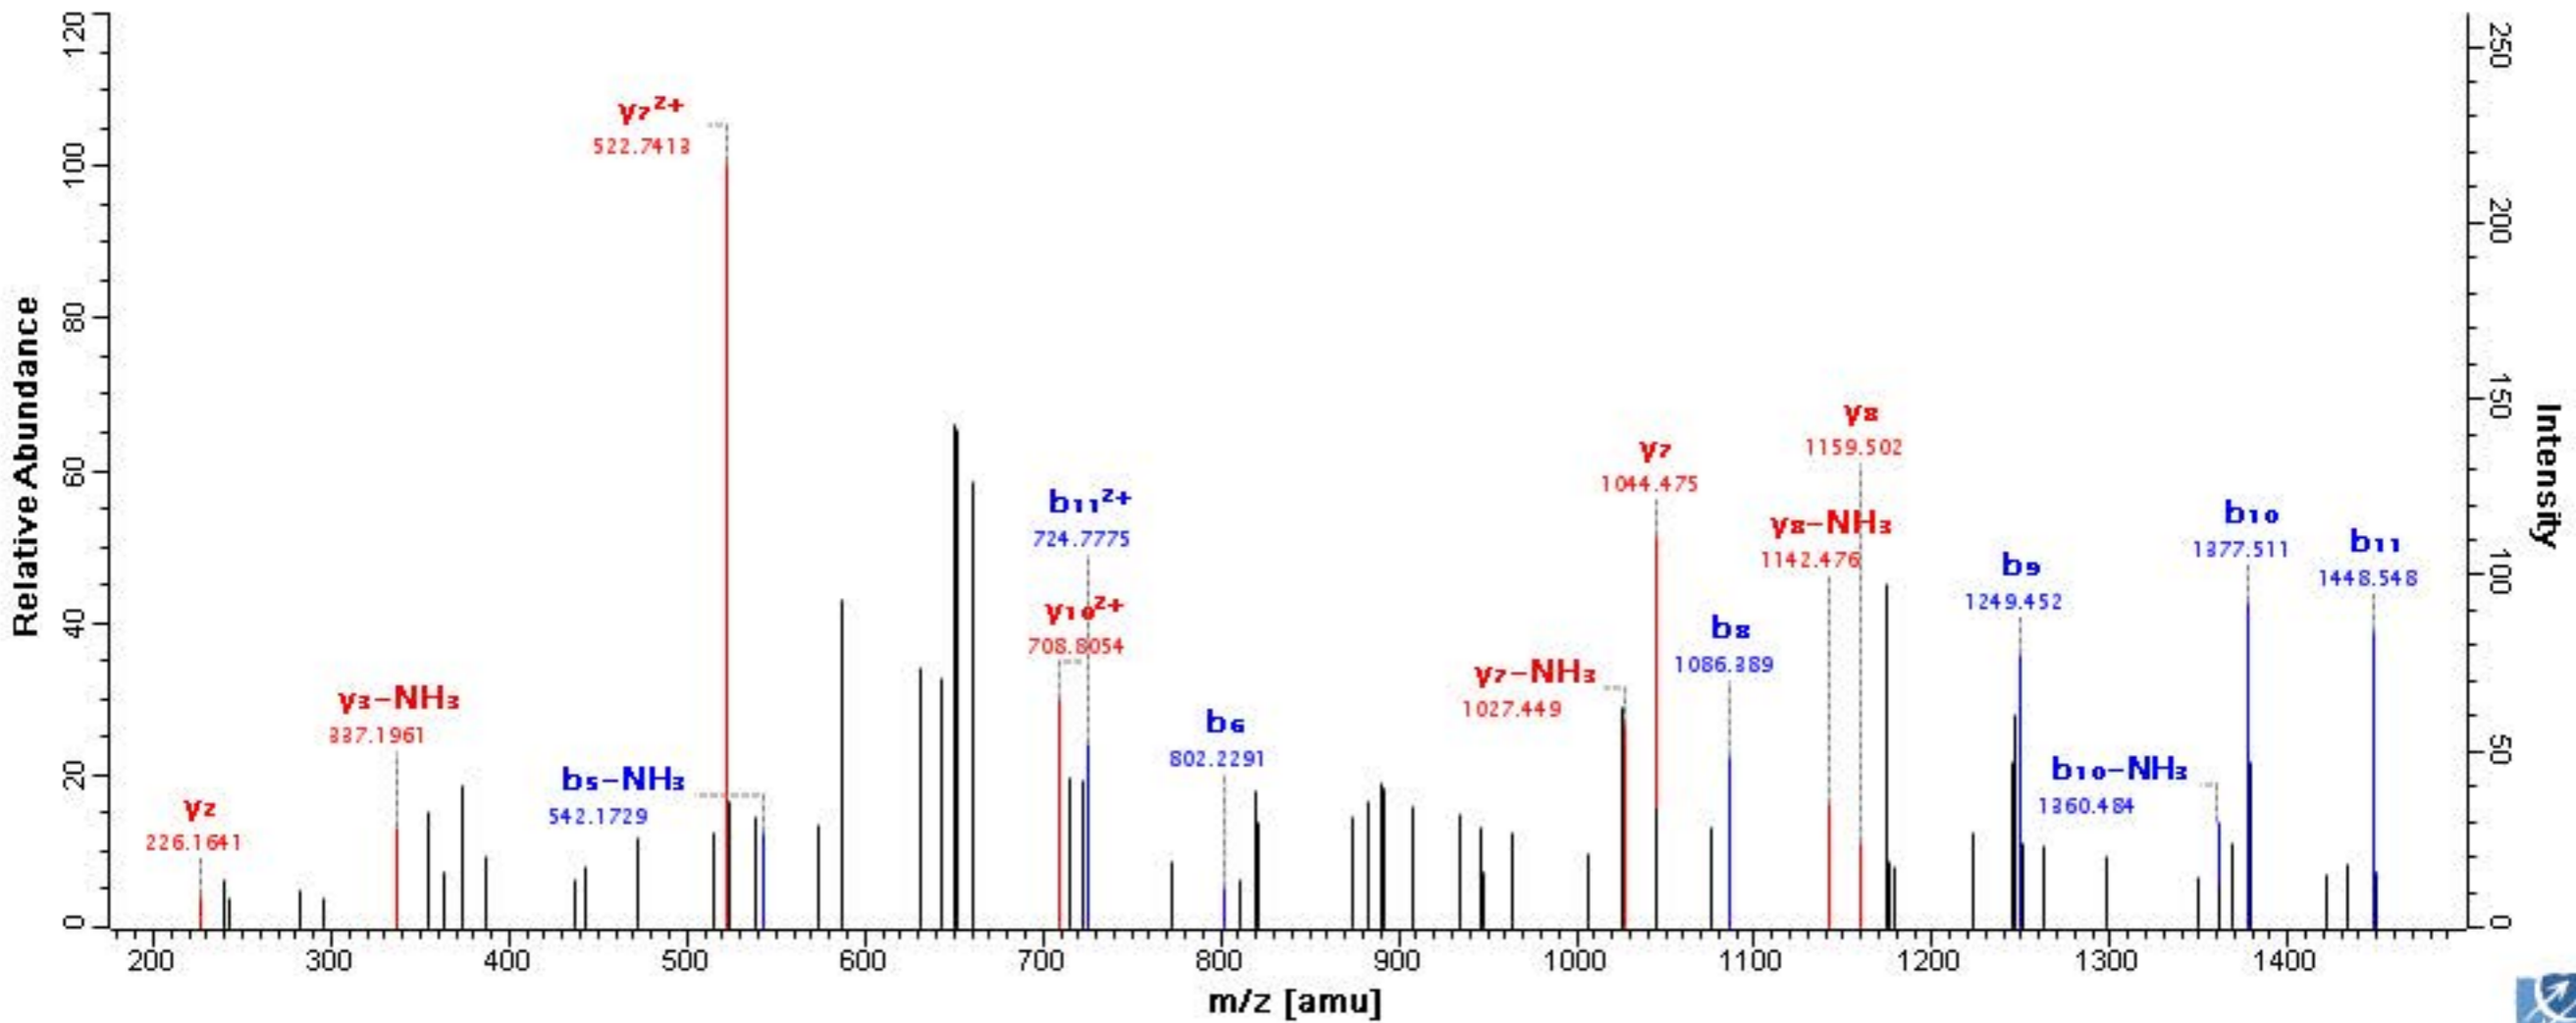

#### precursor information

|                   |                     |
|-------------------|---------------------|
| Mass:             | 1593.64639          |
| m/z:              | System.Collections. |
| Charge:           | System.Collections. |
| Retentiontime:    | System.Collections. |
| Score:            | 89.40346            |
| Mass Error [ppm]: | 0.20257             |
| PEP:              | 0.0024419           |
| Precursor Type:   | MULTI               |

#### general information

|                       |             |
|-----------------------|-------------|
| Annotation:           | 7 of 12     |
| AminoAcids Coverag    | 58 %        |
| Intensity Coverage:   | 32 %        |
| Protein Localisation: | 350 ... 361 |

| b <sup>2+</sup> ion |          | b ion     |          | seq |   |    | γ ion    |           | γ <sup>2+</sup> ion |           |
|---------------------|----------|-----------|----------|-----|---|----|----------|-----------|---------------------|-----------|
| Δ dalton            | mass     | Δ dalton  | mass     |     |   |    | Δ dalton | mass      | Δ dalton            | mass      |
|                     | 72.04439 |           | 72.04439 | 1   | A | 11 |          |           |                     |           |
|                     | 187.0713 |           | 187.0713 | 2   | D | 10 | 1531.63  |           | 1531.63             |           |
|                     | 315.1299 |           | 315.1299 | 3   | Q | 9  | 1416.603 |           | 708.8054            | +0.309854 |
|                     | 444.1725 |           | 444.1725 | 4   | E | 8  | 1288.545 |           | 1288.545            |           |
|                     | 559.1994 |           | 559.1994 | 5   | D | 7  | 1159.502 | +0.373541 | 1159.502            |           |
|                     | 802.2291 | +0.175252 | 802.2291 | 6   | Y | 6  | 1044.475 | +0.022677 | 522.7413            | +0.06019  |
|                     | 958.3302 |           | 958.3302 | 7   | R | 5  | 801.4457 |           | 801.4457            |           |
|                     | 1086.389 | +0.128784 | 1086.389 | 8   | Q | 4  | 645.3446 |           | 645.3446            |           |
|                     | 1249.452 | +0.045802 | 1249.452 | 9   | Y | 3  | 517.286  |           | 517.286             |           |
|                     | 1377.511 | -0.022419 | 1377.511 | 10  | Q | 2  | 354.2227 |           | 354.2227            |           |
| +0.286969           | 724.7775 | +0.155677 | 1448.548 | 11  | A | 1  | 226.1641 | +0.233085 | 226.1641            |           |
|                     |          |           |          | 12  | K | 0  | 155.127  |           | 155.127             |           |

Source: 201205213\_VR\_Bsu\_TripleSILACrep1\_pL2ESLS\_F03  
 Scannumber: 5658  
 Protein: BSU06030; groEL; groL; mopA  
 Peptide Score: 116.24  
 Method: ITMS; CID; 3

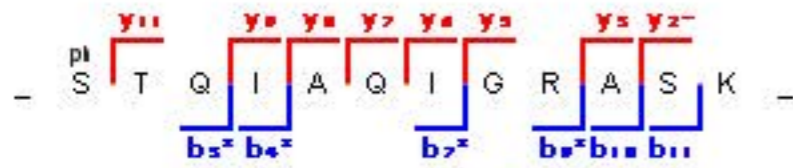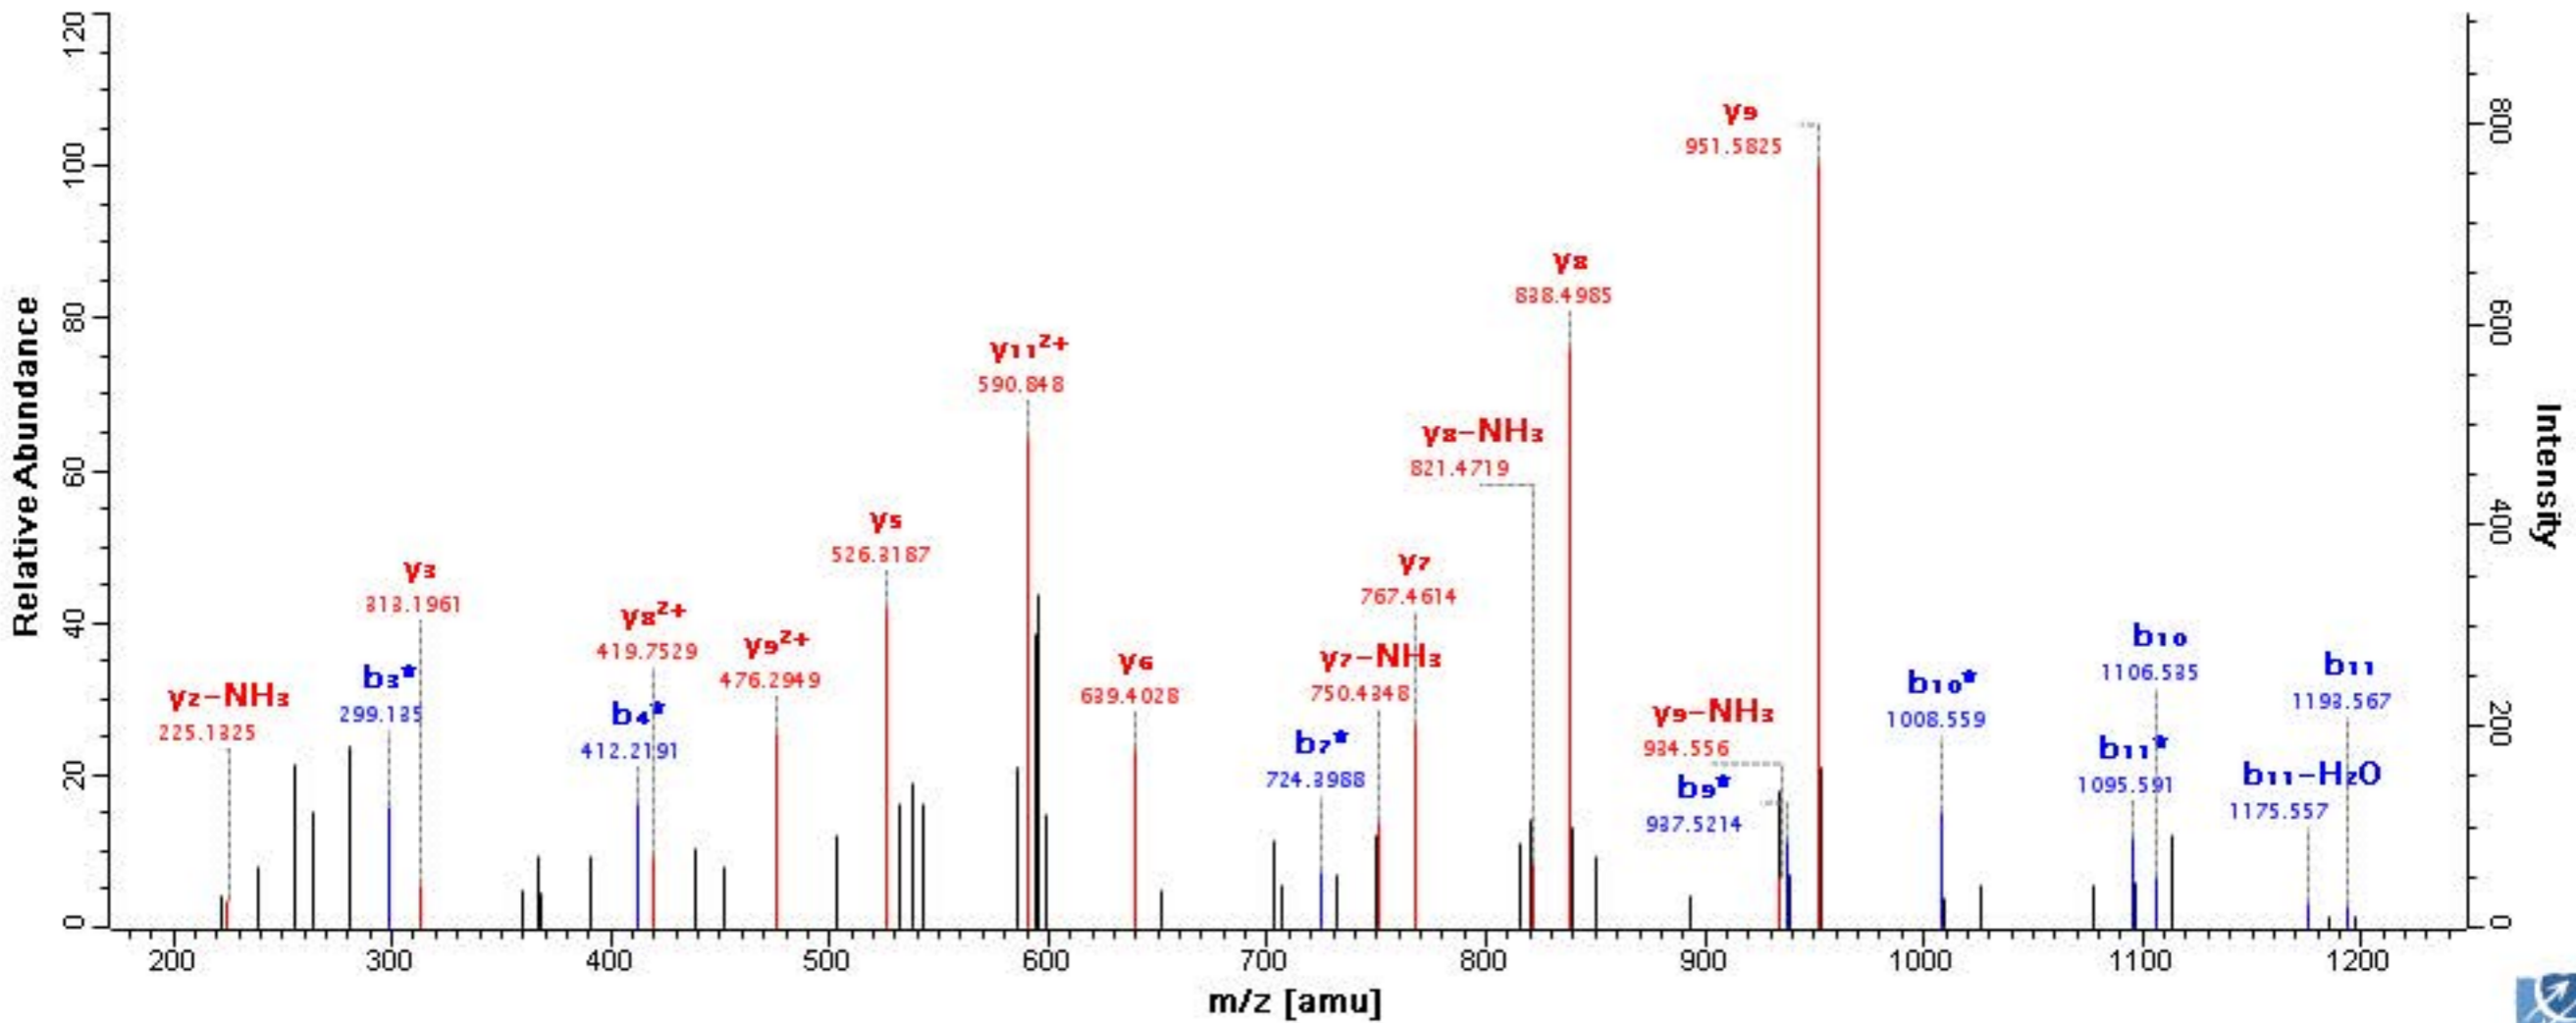

#### precursor information

|                   |                     |
|-------------------|---------------------|
| Mass:             | 1338.66497          |
| m/z:              | System.Collections. |
| Charge:           | System.Collections. |
| Retentiontime:    | System.Collections. |
| Score:            | 116.2378            |
| Mass Error [ppm]: | -0.52632            |
| PEP:              | 1.892E-05           |
| Precursor Type:   | MULTI               |

#### general information

|                       |             |
|-----------------------|-------------|
| Annotation:           | 10 of 12    |
| AminoAcids Coverag    | 83 %        |
| Intensity Coverage:   | 51 %        |
| Protein Localisation: | 309 ... 320 |

| b ion      |              |    |     |    | y ion        |            | y <sup>2+</sup> ion |            |
|------------|--------------|----|-----|----|--------------|------------|---------------------|------------|
| Δ dalton   | mass         |    | seq |    | Δ dalton     | mass       | Δ dalton            | mass       |
|            | 168.00563528 | 1  | S   | 11 |              |            |                     |            |
|            | 269.05331376 | 2  | T   | 10 | 1180.6887952 |            | 590.84803582        | -0.0470104 |
|            | 397.11189127 | 3  | Q   | 9  | 1079.6411167 |            | 1079.6411167        |            |
|            | 510.19595525 | 4  | I   | 8  | 951.58253919 | -0.0722243 | 476.29490783        | +0.0231464 |
|            | 581.23306904 | 5  | A   | 7  | 838.49847521 | -0.0566417 | 419.75287584        | +0.1074147 |
|            | 709.29164655 | 6  | Q   | 6  | 767.46136142 | -0.0548673 | 767.46136142        |            |
|            | 822.37571053 | 7  | I   | 5  | 639.40278391 | +0.0251946 | 639.40278391        |            |
|            | 879.39717425 | 8  | G   | 4  | 526.31871993 | +0.1366634 | 526.31871993        |            |
|            | 1035.4982853 | 9  | R   | 3  | 469.29725621 |            | 469.29725621        |            |
| -0.0693346 | 1106.5353991 | 10 | A   | 2  | 313.19614518 | -0.0163051 | 313.19614518        |            |
| -0.0591267 | 1193.5674275 | 11 | S   | 1  | 242.15903139 |            | 242.15903139        |            |
|            |              | 12 | K   | 0  | 155.12700298 |            | 155.12700298        |            |

Source: 201205213\_VR\_Bsu\_TripleSILACrep1\_pL2ESLS\_F03  
 Scannumber: 5780  
 Protein: BSU16910; ymfM  
 Peptide Score: 151.99  
 Method: ITMS; CID; 3

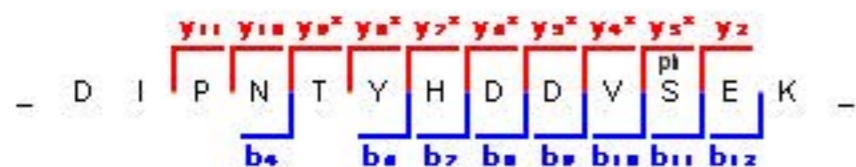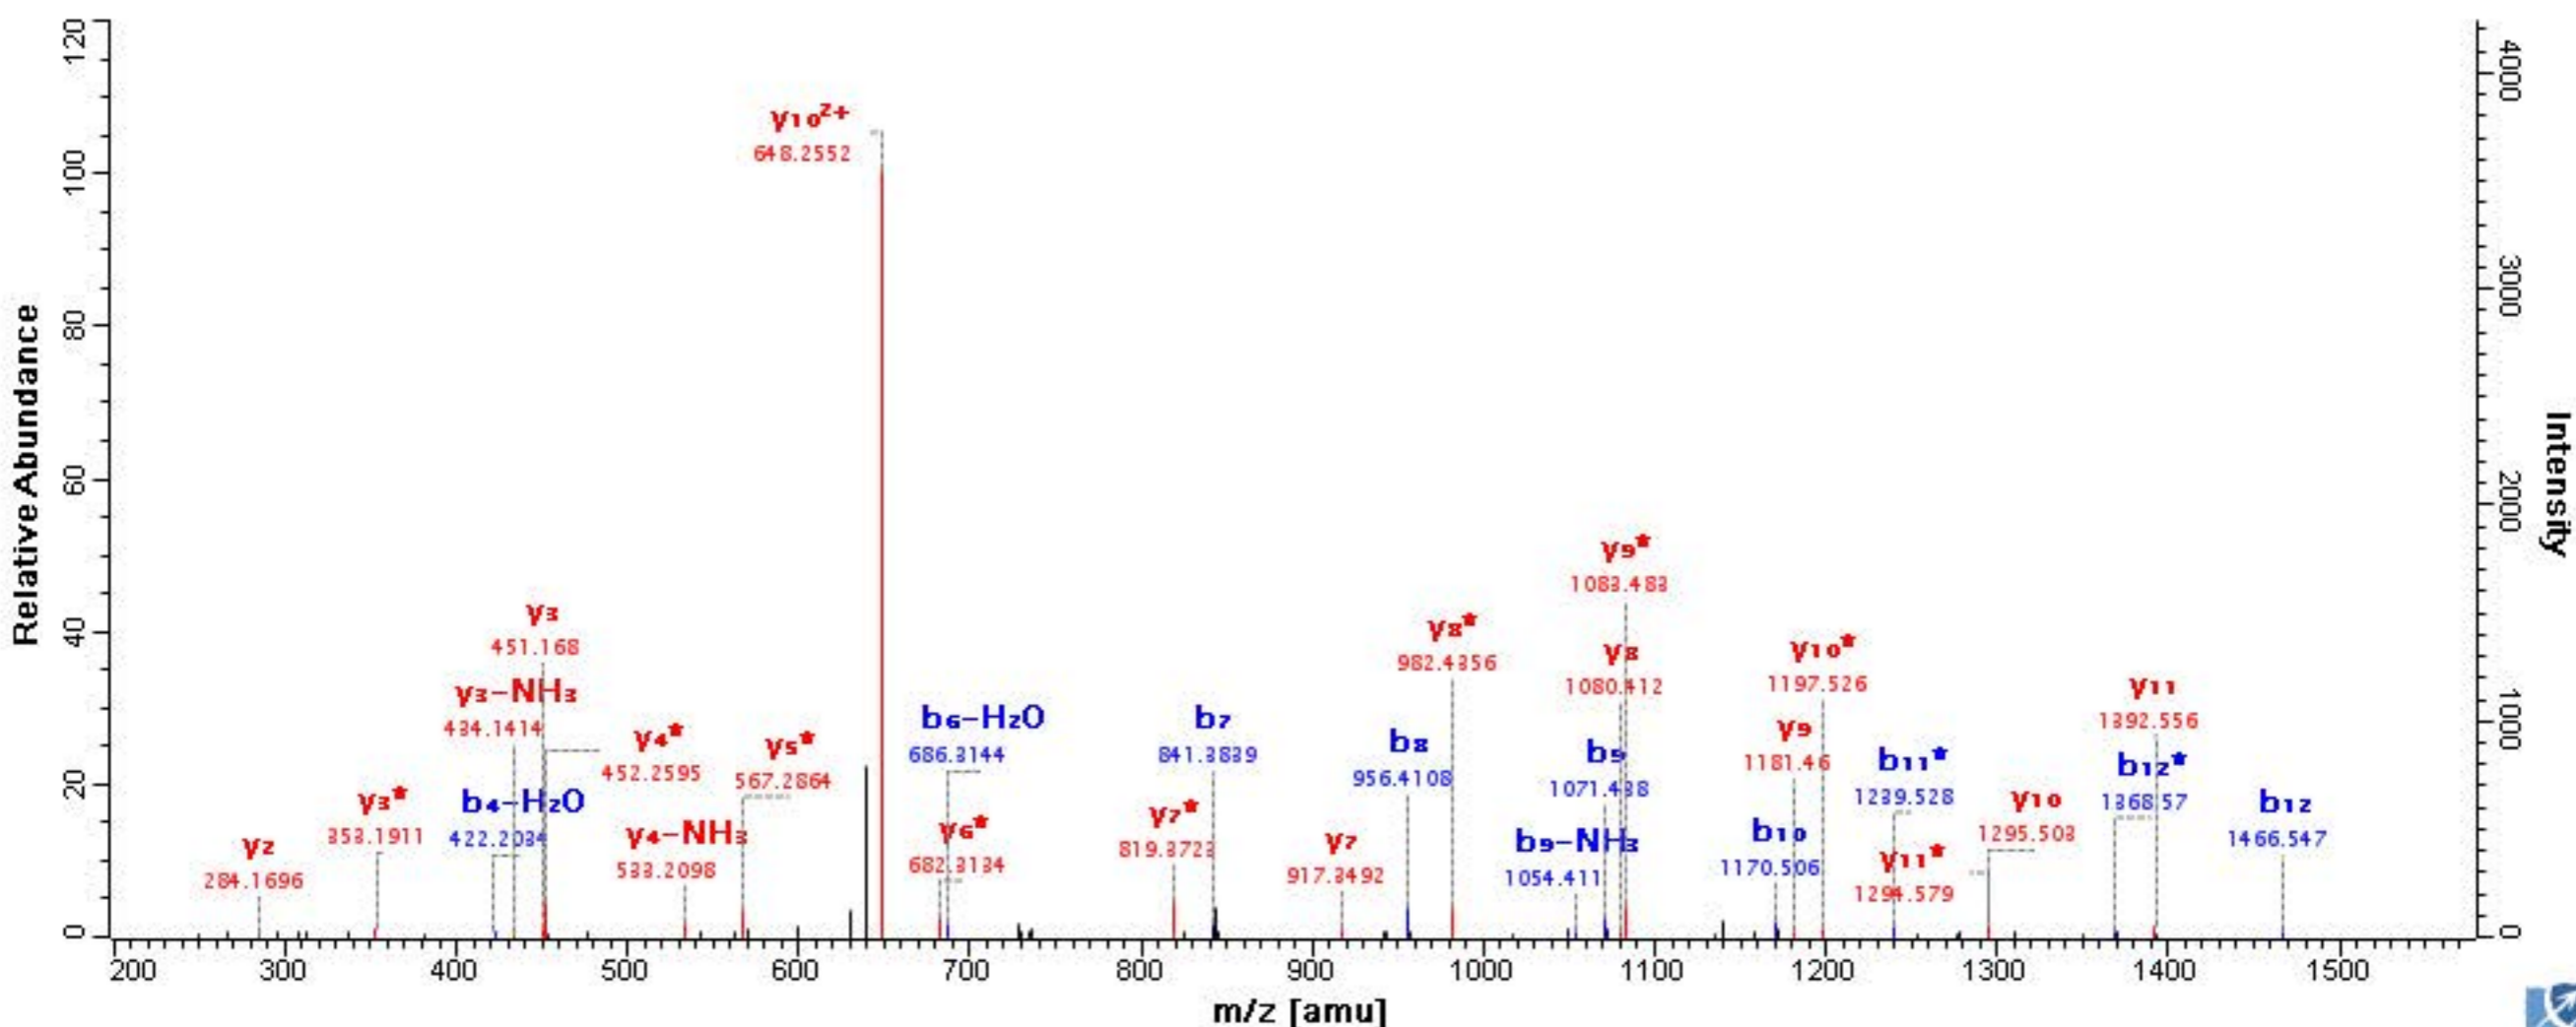

**precursor information**

|                   |                     |
|-------------------|---------------------|
| Mass:             | 1611.64559          |
| m/z:              | System.Collections. |
| Charge:           | System.Collections. |
| Retentiontime:    | System.Collections. |
| Score:            | 151.9937            |
| Mass Error [ppm]: | 0.11904             |
| PEP:              | 1.6281E-17          |
| Precursor Type:   | MULTI               |

**general information**

|                       |           |
|-----------------------|-----------|
| Annotation:           | 10 of 13  |
| AminoAcids Coverag    | 77 %      |
| Intensity Coverage:   | 72 %      |
| Protein Localisation: | 59 ... 71 |

| b ion      |              |    |     |    | γ ion        |            | γ <sup>2+</sup> ion |            |
|------------|--------------|----|-----|----|--------------|------------|---------------------|------------|
| Δ dalton   | mass         |    | seq |    | Δ dalton     | mass       | Δ dalton            | mass       |
|            | 116.0342195  | 1  | D   | 12 |              |            |                     |            |
|            | 229.11828348 | 2  | I   | 11 | 1505.639929  |            | 1505.639929         |            |
|            | 326.17104733 | 3  | P   | 10 | 1392.5558651 | -0.1054256 | 1392.5558651        |            |
|            | 440.21397478 | 4  | N   | 9  | 1295.5031012 | +0.1354486 | 648.25518883        | -0.3599252 |
|            | 541.26165325 | 5  | T   | 8  | 1181.4601738 | -0.056121  | 1181.4601738        |            |
|            | 704.32498179 | 6  | Y   | 7  | 1080.4124953 | +0.1451219 | 1080.4124953        |            |
| -0.035566  | 841.38389365 | 7  | H   | 6  | 917.34916674 | +0.1198884 | 917.34916674        |            |
| +0.0194001 | 956.41083668 | 8  | D   | 5  | 780.29025488 |            | 780.29025488        |            |
| -0.047643  | 1071.4377797 | 9  | D   | 4  | 665.26331185 |            | 665.26331185        |            |
| +0.0187087 | 1170.5061936 | 10 | V   | 3  | 550.23636881 |            | 550.23636881        |            |
|            | 1337.5045525 | 11 | S   | 2  | 451.1679549  | -0.362657  | 451.1679549         |            |
| -0.1048848 | 1466.5471455 | 12 | E   | 1  | 284.16959608 | +0.0643517 | 284.16959608        |            |
|            |              | 13 | K   | 0  | 155.12700298 |            | 155.12700298        |            |

Source: 201205213\_VR\_Bsu\_TripleSILACrep1\_pL2ESLS\_F03  
 Scannumber: 5947  
 Protein: BSU01120; fus; fusA  
 Peptide Score: 129.38  
 Method: ITMS; CID; 3

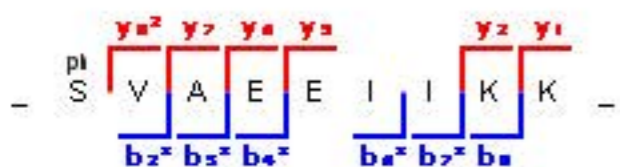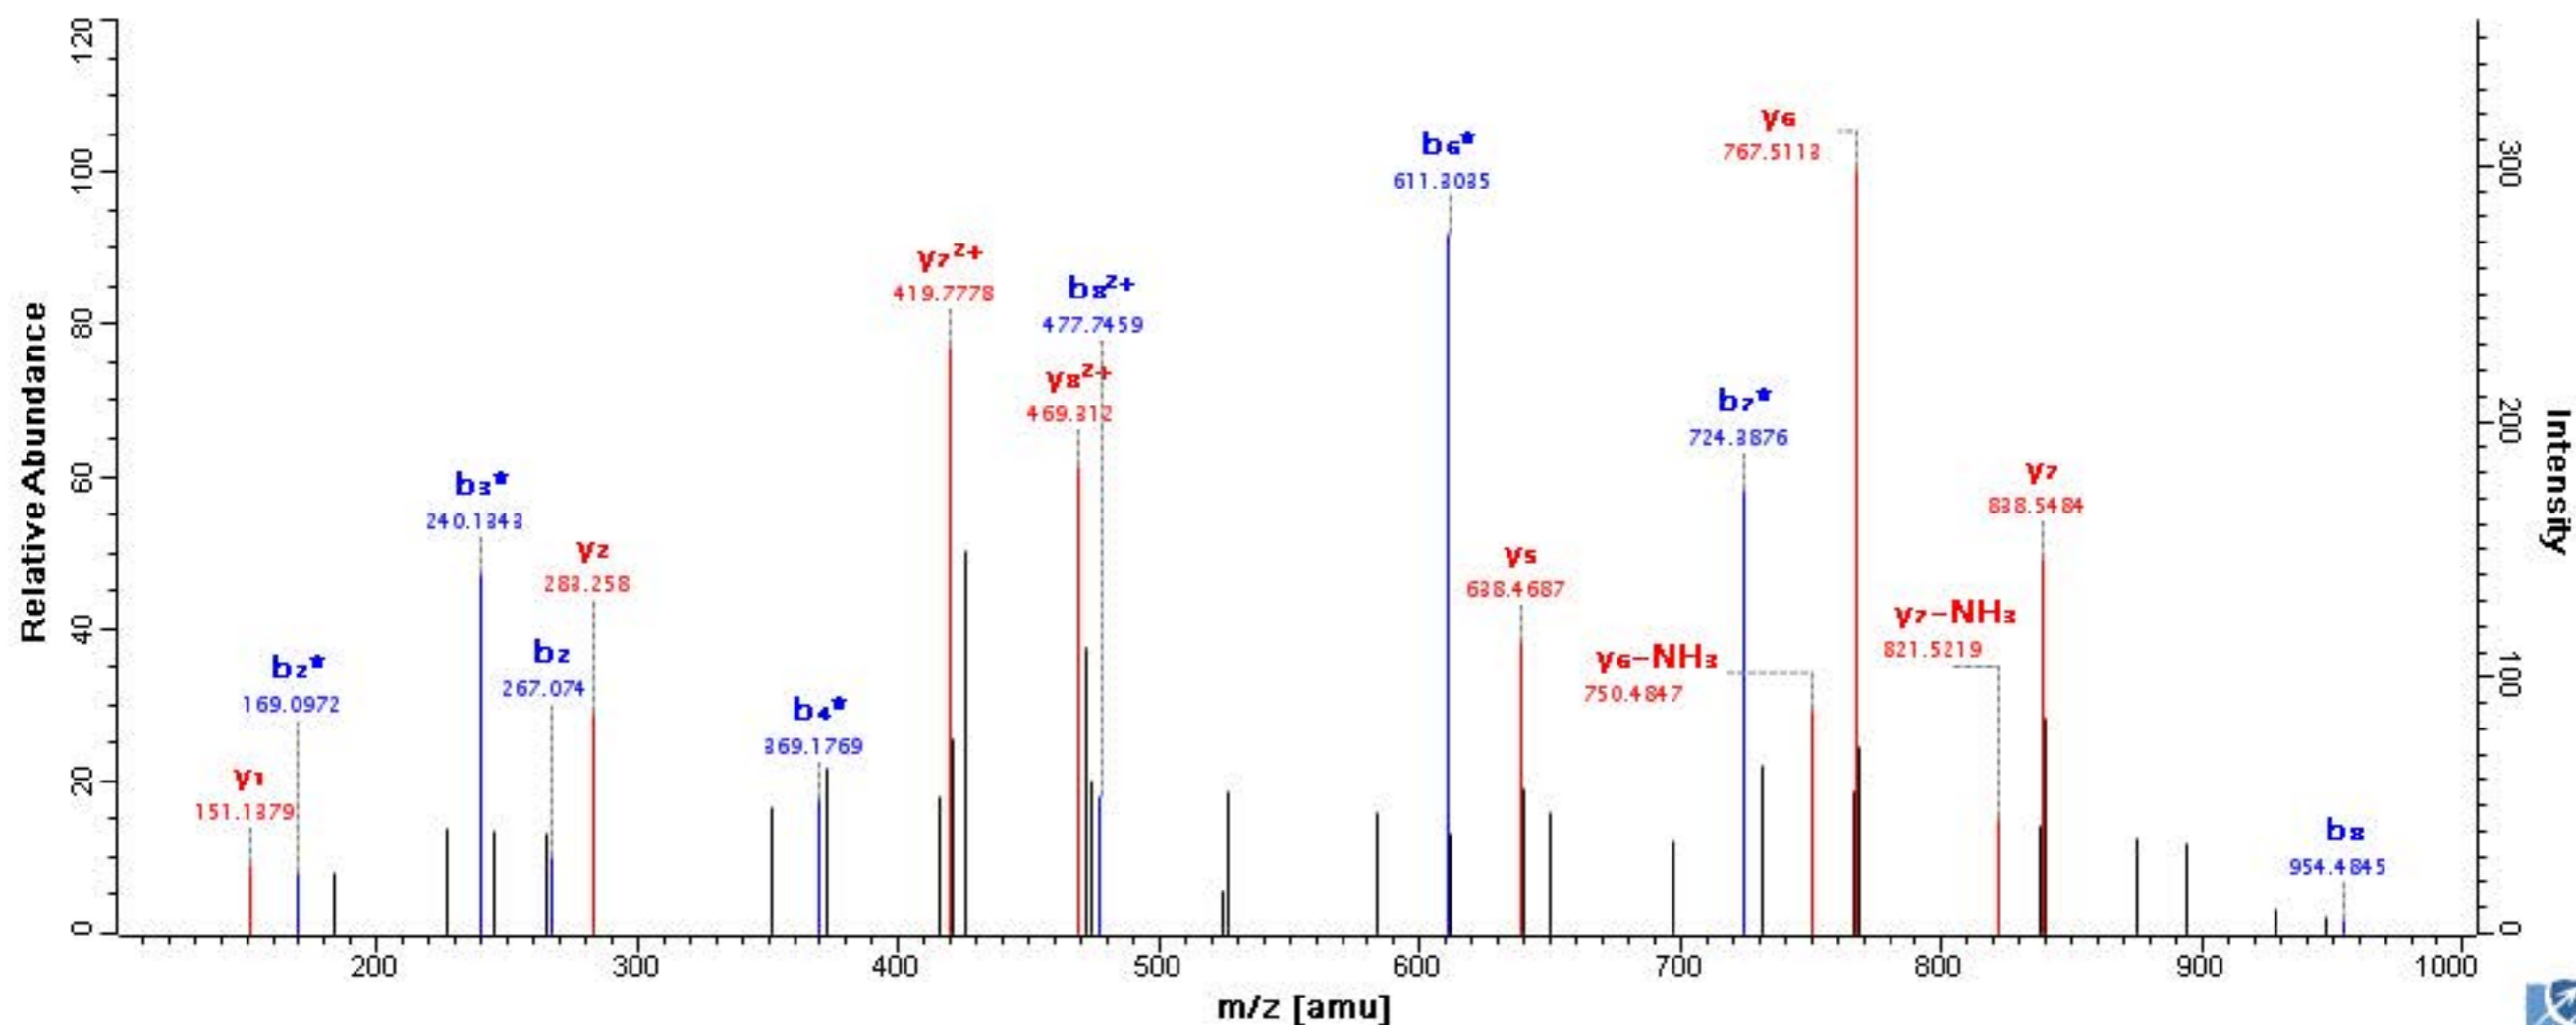

#### precursor information

|                       |                     |
|-----------------------|---------------------|
| Mass:                 | 1095.55745          |
| m/z:                  | System.Collections. |
| Charge:               | System.Collections. |
| Retentiontime:        | System.Collections. |
| Score:                | 129.3825            |
| Mass Error [ppm]:     | -0.2171             |
| PEP:                  | 0.00019542          |
| g Precursor Type:     | MULTI               |
| Annotation:           | 8 of 9              |
| AminoAcids Coverag    | 89 %                |
| Intensity Coverage:   | 58 %                |
| Protein Localisation: | 680 ... 688         |

| b <sup>2+</sup> ion |          | b ion     |          |     | y ion |          | y <sup>2+</sup> ion |           |           |           |
|---------------------|----------|-----------|----------|-----|-------|----------|---------------------|-----------|-----------|-----------|
| Δ dalton            | mass     | Δ dalton  | mass     | seq |       | Δ dalton | mass                | Δ dalton  | mass      |           |
|                     | 168.0056 |           | 168.0056 | 1   | S     | 8        |                     |           |           |           |
|                     | 267.074  | -0.089186 | 267.074  | 2   | V     | 7        | 937.6168            | 469.312   | -0.052467 |           |
|                     | 338.1112 |           | 338.1112 | 3   | A     | 6        | 838.5484            | +0.115165 | 419.7778  | -0.059886 |
|                     | 467.1538 |           | 467.1538 | 4   | E     | 5        | 767.5113            | -0.000492 | 767.5113  |           |
|                     | 596.1963 |           | 596.1963 | 5   | E     | 4        | 638.4687            | +0.034044 | 638.4687  |           |
|                     | 709.2804 |           | 709.2804 | 6   | I     | 3        | 509.4261            |           | 509.4261  |           |
|                     | 822.3645 |           | 822.3645 | 7   | I     | 2        | 396.342             |           | 396.342   |           |
| -0.269654           | 477.7459 | +0.089427 | 954.4845 | 8   | K     | 1        | 283.258             | +0.020766 | 283.258   |           |
|                     |          |           |          | 9   | K     | 0        | 151.1379            | +0.076505 | 151.1379  |           |

Source: 201205213\_VR\_Bsu\_TripleSILACrep1\_pL2ESLS\_F03  
 Scannumber: 5972  
 Protein: BSU24090; yqi5  
 Peptide Score: 190.24  
 Method: ITMS; CID; 3

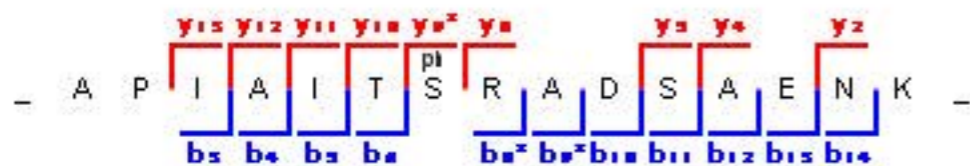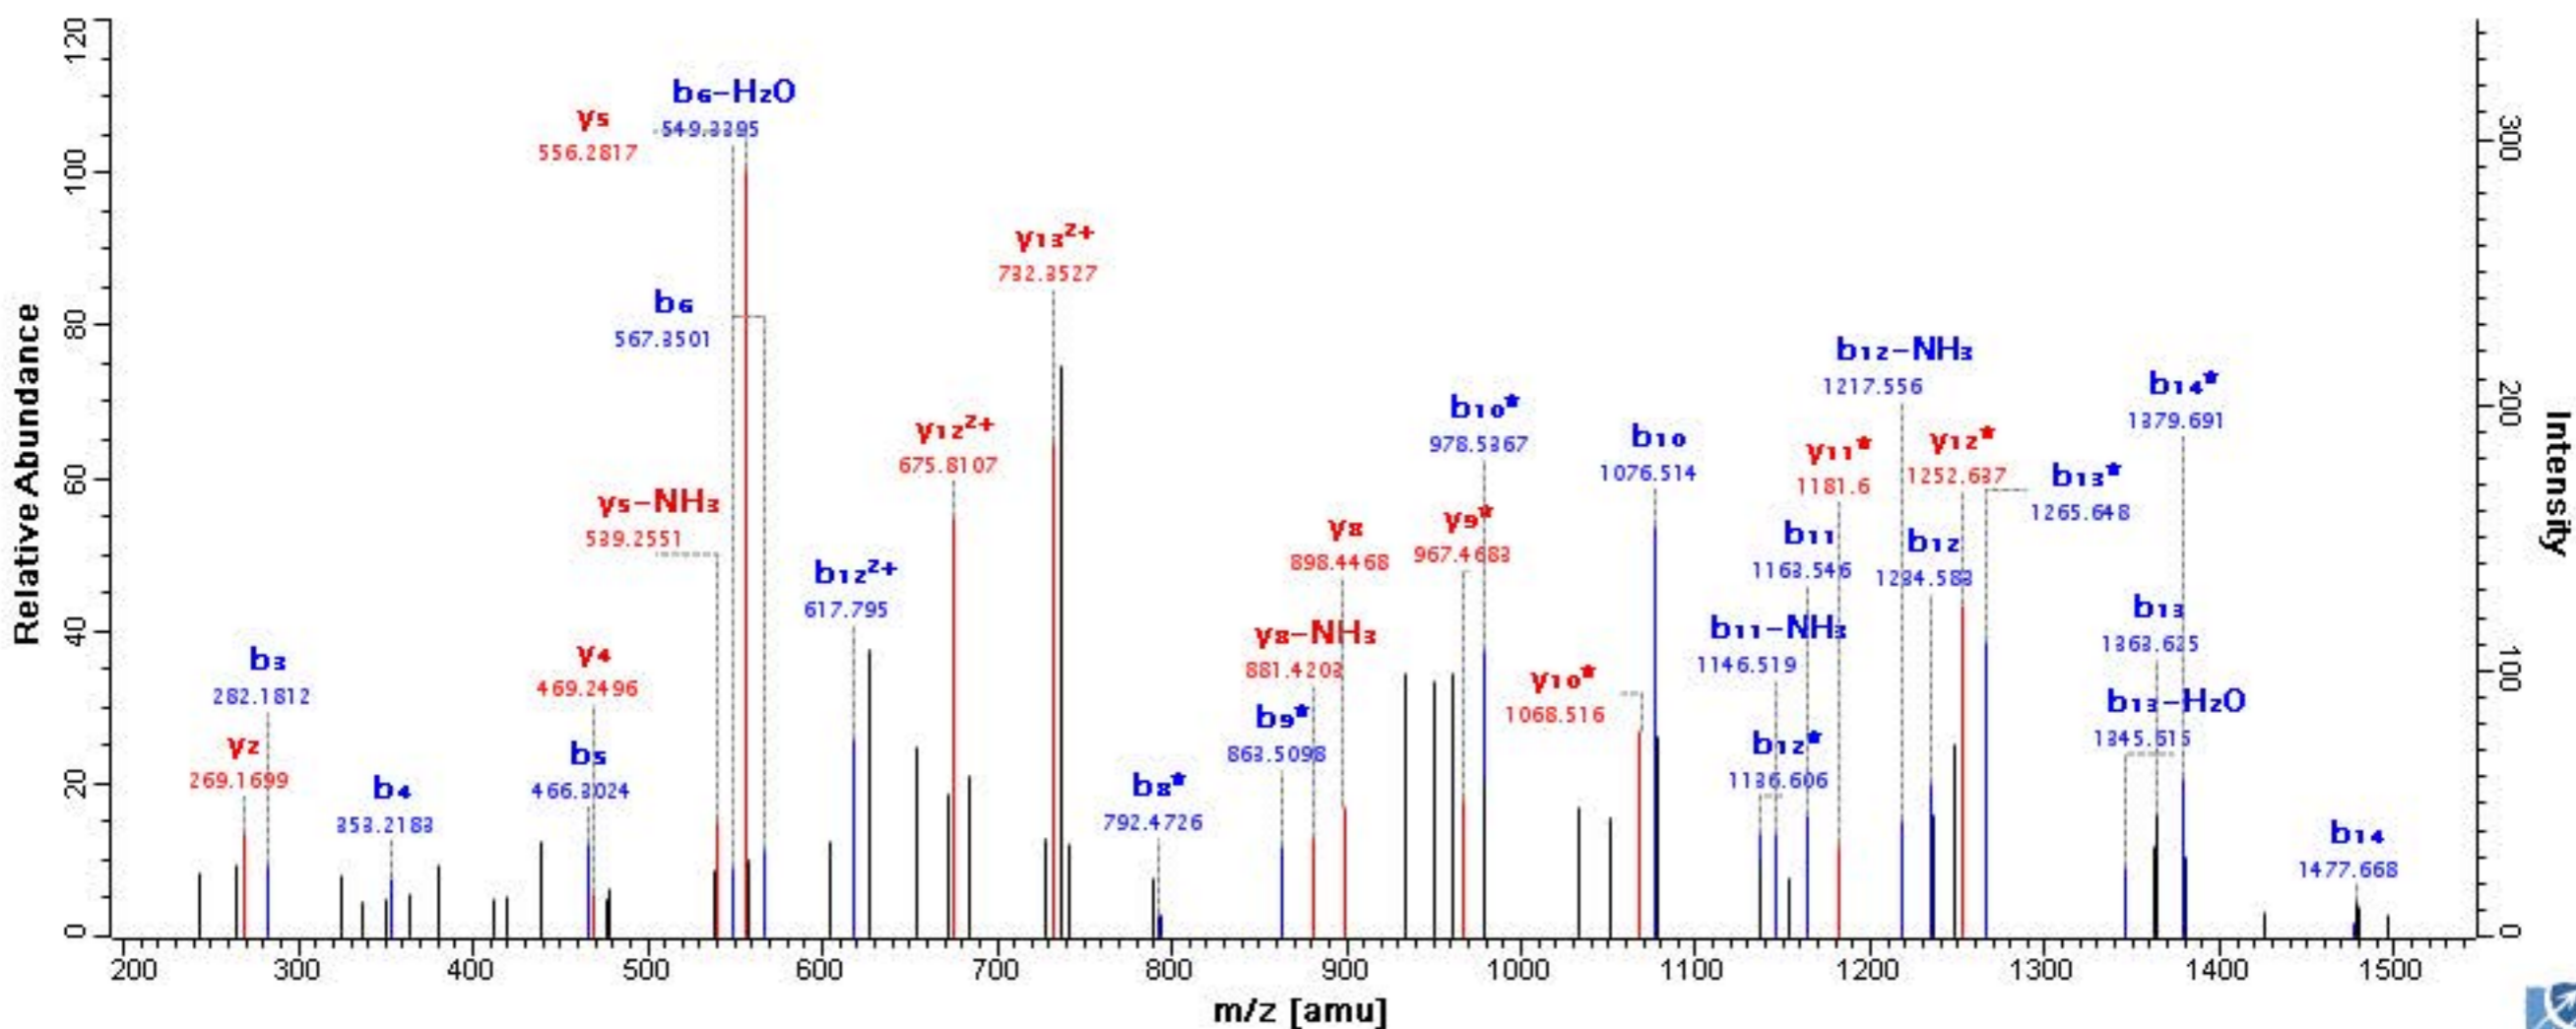

#### precursor information

|                   |                     |
|-------------------|---------------------|
| Mass:             | 1630.78067          |
| m/z:              | System.Collections. |
| Charge:           | System.Collections. |
| Retentiontime:    | System.Collections. |
| Score:            | 190.2384            |
| Mass Error [ppm]: | -0.026391           |
| PEP:              | 3.327E-71           |
| Precursor Type:   | ISO                 |

| b <sup>2+</sup> ion |          | b ion     |          |    |     |    | γ ion    |           | γ <sup>2+</sup> ion |           |
|---------------------|----------|-----------|----------|----|-----|----|----------|-----------|---------------------|-----------|
| Δ dalton            | mass     | Δ dalton  | mass     |    | seq |    | Δ dalton | mass      | Δ dalton            | mass      |
|                     | 72.04439 |           | 72.04439 | 1  | A   | 14 |          |           |                     |           |
|                     | 169.0972 |           | 169.0972 | 2  | P   | 13 | 1560.751 |           | 1560.751            |           |
|                     | 282.1812 | -0.104863 | 282.1812 | 3  | I   | 12 | 1463.698 |           | 732.3527            | +0.318509 |
|                     | 353.2183 | -0.069345 | 353.2183 | 4  | A   | 11 | 1350.614 |           | 675.8107            | +0.061957 |
|                     | 466.3024 | +0.008395 | 466.3024 | 5  | I   | 10 | 1279.577 |           | 1279.577            |           |
|                     | 567.3501 | +0.141503 | 567.3501 | 6  | T   | 9  | 1166.493 |           | 1166.493            |           |
|                     | 734.3484 |           | 734.3484 | 7  | S   | 8  | 1065.445 |           | 1065.445            |           |
|                     | 890.4495 |           | 890.4495 | 8  | R   | 7  | 898.4468 | +0.132817 | 898.4468            |           |
|                     | 961.4867 |           | 961.4867 | 9  | A   | 6  | 742.3457 |           | 742.3457            |           |
|                     | 1076.514 | -0.006399 | 1076.514 | 10 | D   | 5  | 671.3086 |           | 671.3086            |           |
|                     | 1163.546 | +0.058985 | 1163.546 | 11 | S   | 4  | 556.2817 | -0.139759 | 556.2817            |           |
| +0.12302            | 617.795  | -0.002787 | 1234.583 | 12 | A   | 3  | 469.2496 | +0.096554 | 469.2496            |           |
|                     | 1363.625 | +0.086089 | 1363.625 | 13 | E   | 2  | 398.2125 |           | 398.2125            |           |
|                     | 1477.668 | -0.303396 | 1477.668 | 14 | N   | 1  | 269.1699 | +0.023032 | 269.1699            |           |
|                     |          |           |          | 15 | K   | 0  | 155.127  |           | 155.127             |           |

#### general information

|                       |             |
|-----------------------|-------------|
| Annotation:           | 12 of 15    |
| AminoAcids Coverag    | 80 %        |
| Intensity Coverage:   | 54 %        |
| Protein Localisation: | 269 ... 283 |

Source: 201205213\_VR\_Bsu\_TripleSILACrep1\_pL2ESLS\_F03  
 Scannumber: 6639  
 Protein: BSU28270; leuB; leuC  
 Peptide Score: 122.46  
 Method: ITMS; CID; 3

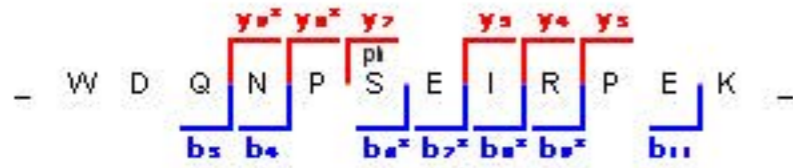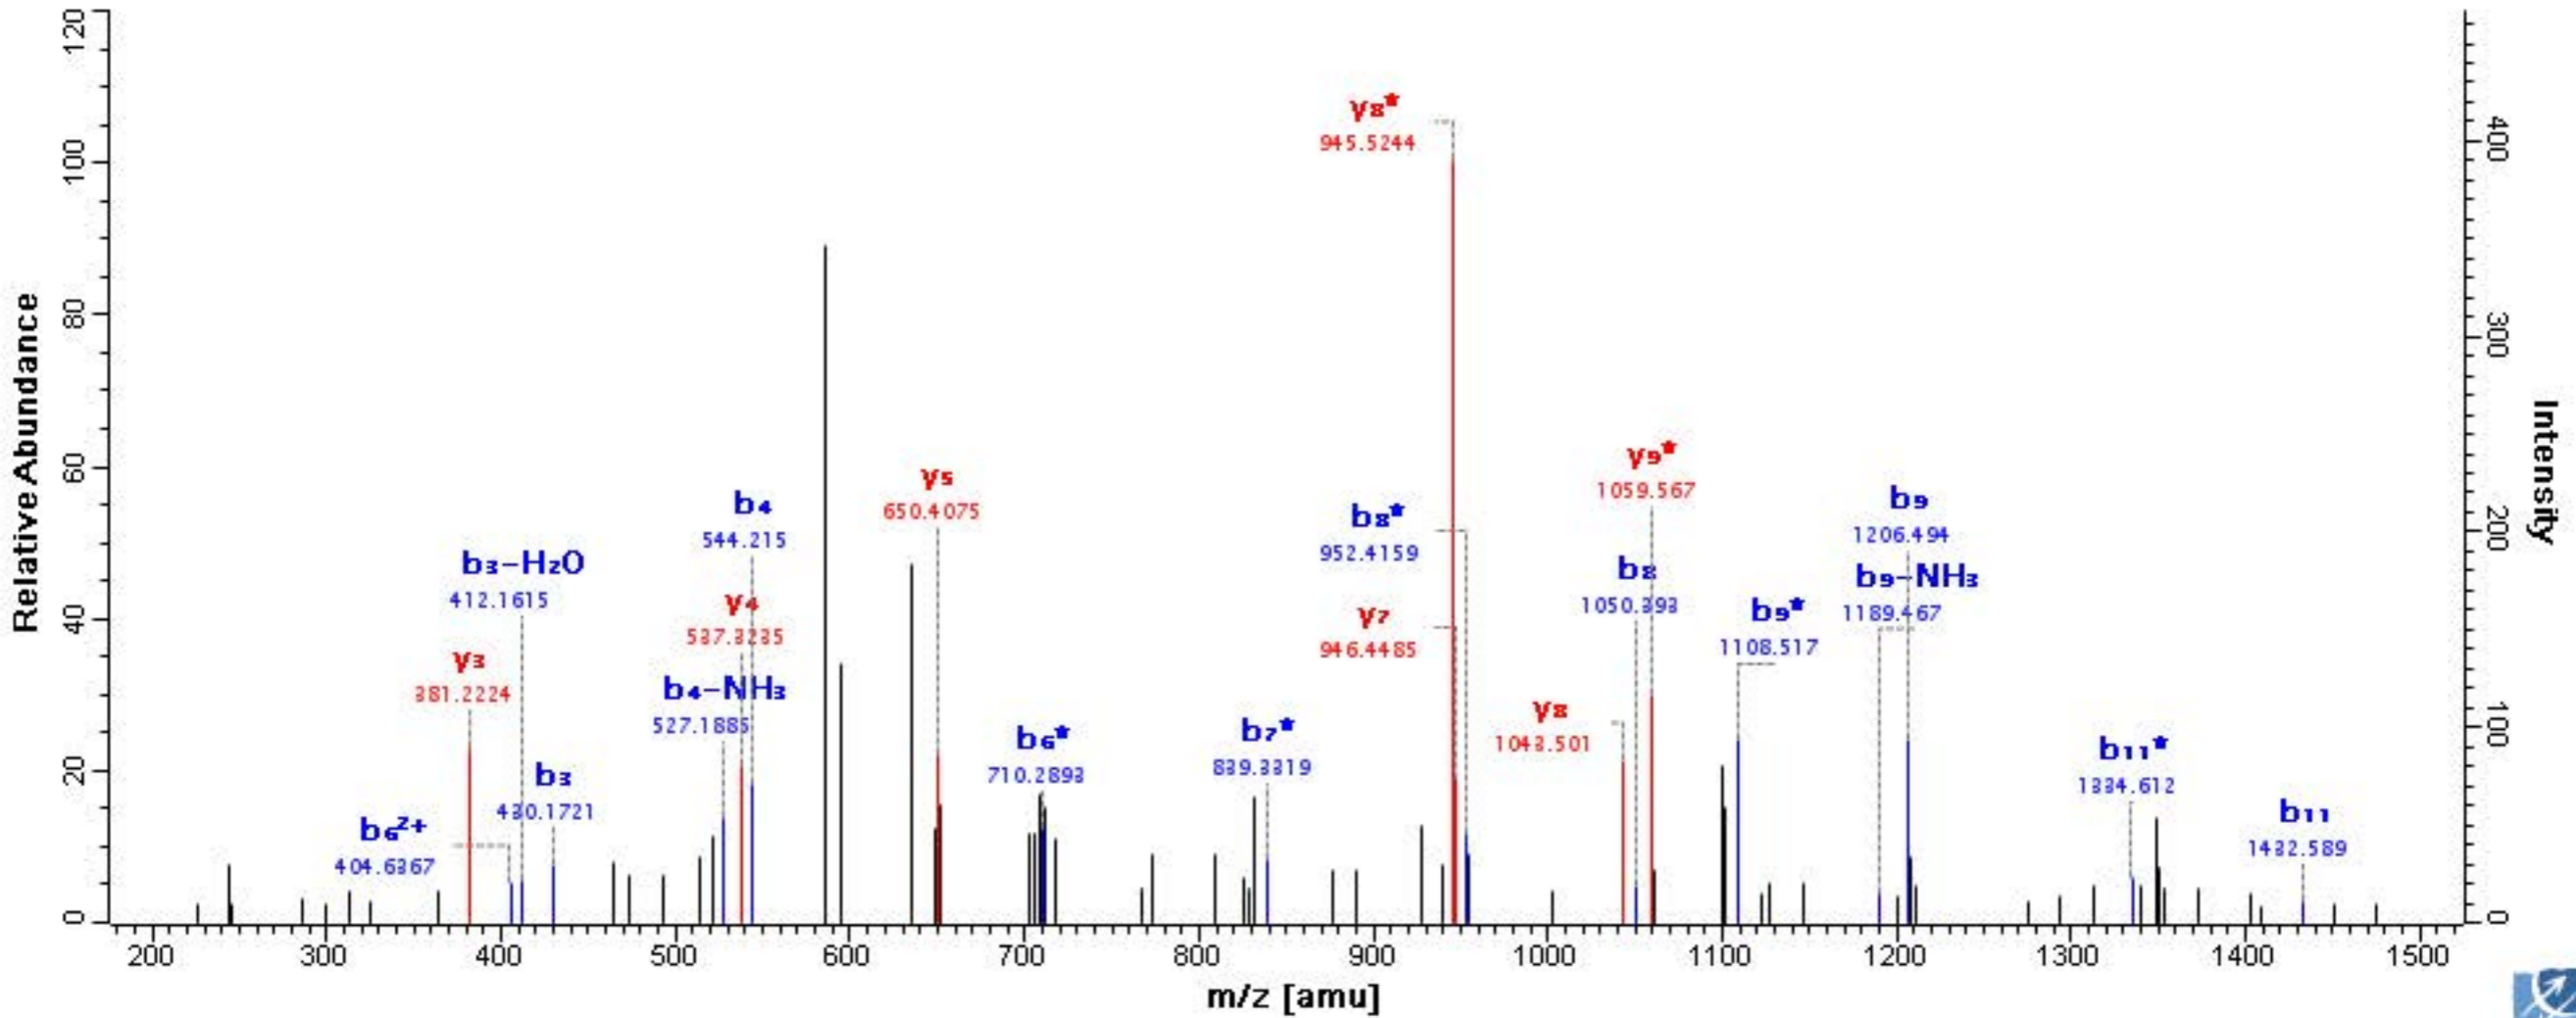

**precursor information**

|                   |                     |
|-------------------|---------------------|
| Mass:             | 1577.68747          |
| m/z:              | System.Collections. |
| Charge:           | System.Collections. |
| Retentiontime:    | System.Collections. |
| Score:            | 122.4593            |
| Mass Error [ppm]: | -0.043107           |
| PEP:              | 2.7378E-06          |
| Precursor Type:   | MULTI               |

**general information**

|                       |           |
|-----------------------|-----------|
| Annotation:           | 9 of 12   |
| AminoAcids Coverag    | 75 %      |
| Intensity Coverage:   | 39 %      |
| Protein Localisation: | 79 ... 90 |

| b <sup>2+</sup> ion |              | b ion      |              |     | y ion |          |              |
|---------------------|--------------|------------|--------------|-----|-------|----------|--------------|
| Δ dalton            | mass         | Δ dalton   | mass         | seq |       | Δ dalton | mass         |
|                     | 187.08658942 |            | 187.08658942 | 1   | W     | 11       |              |
|                     | 302.11353245 |            | 302.11353245 | 2   | D     | 10       | 1400.6296987 |
|                     | 430.17210996 | -0.0403961 | 430.17210996 | 3   | Q     | 9        | 1285.6027557 |
|                     | 544.21503741 | +0.0155534 | 544.21503741 | 4   | N     | 8        | 1157.5441782 |
|                     | 641.26780126 |            | 641.26780126 | 5   | P     | 7        | 1043.5012507 |
| +0.4937749          | 404.63671827 |            | 808.26616008 | 6   | S     | 6        | 946.44848686 |
|                     | 937.30875318 |            | 937.30875318 | 7   | E     | 5        | 779.45012804 |
|                     | 1050.3928172 | +0.0994924 | 1050.3928172 | 8   | I     | 4        | 650.40753494 |
|                     | 1206.4939282 | -0.1340649 | 1206.4939282 | 9   | R     | 3        | 537.32347096 |
|                     | 1303.546692  |            | 1303.546692  | 10  | P     | 2        | 381.22235993 |
|                     | 1432.5892851 | -0.1896269 | 1432.5892851 | 11  | E     | 1        | 284.16959608 |
|                     |              |            |              | 12  | K     | 0        | 155.12700298 |

Source: 201205213\_VR\_Bsu\_TripleSILACrep1\_pL2ESLS\_FD3  
 Scannumber: 9012  
 Protein: BSU26230; yqaP  
 Peptide Score: 128.76  
 Method: ITMS; CID; 3

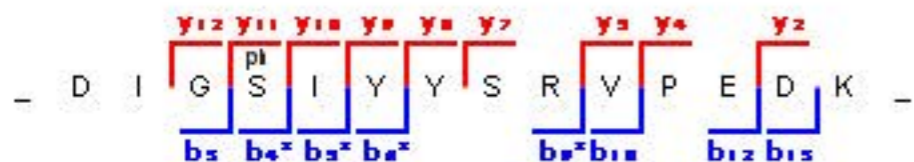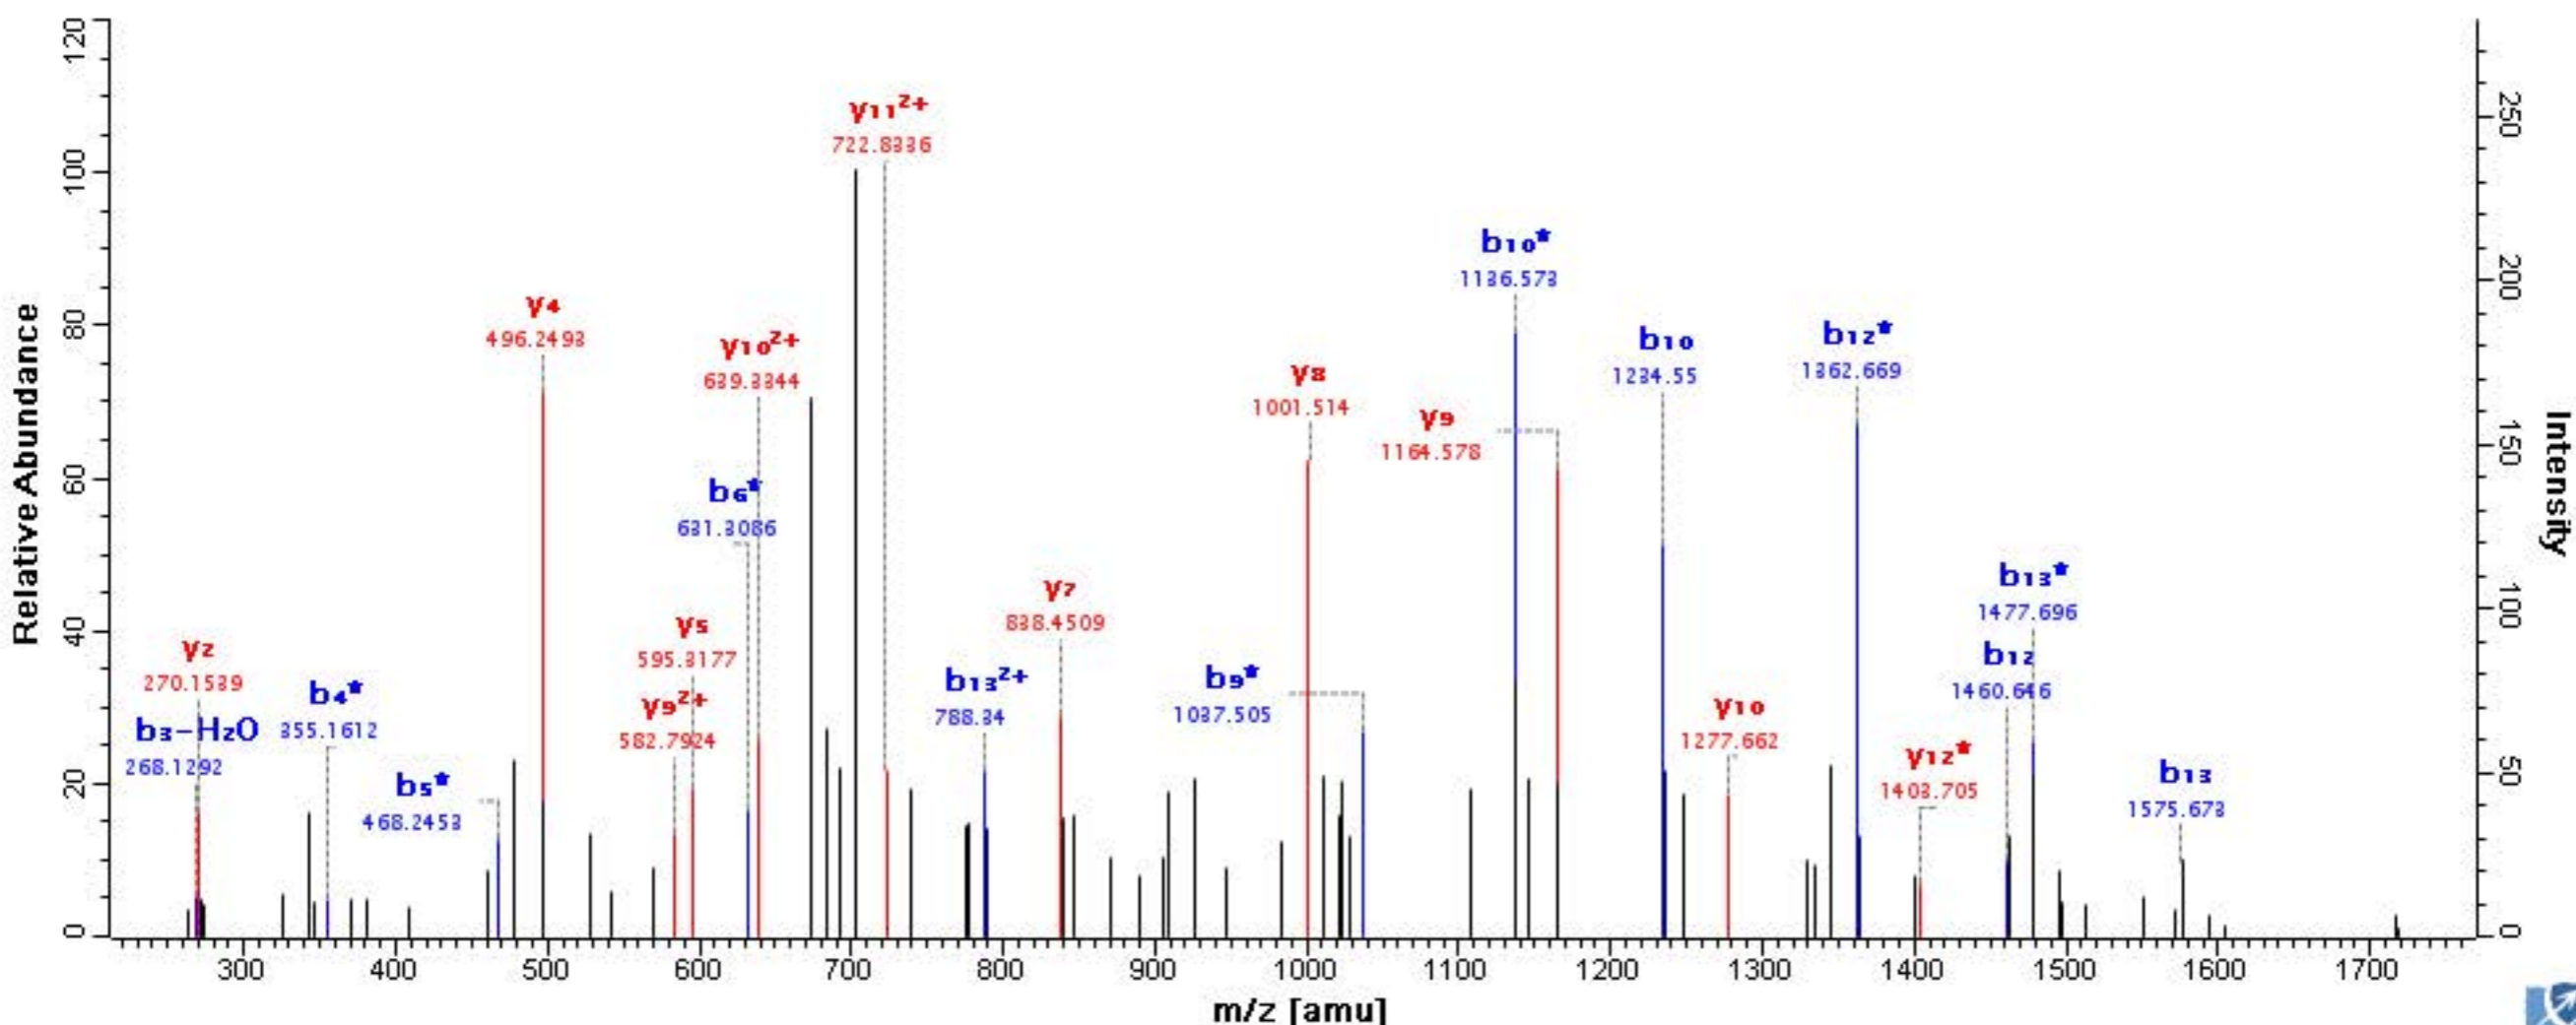

**precursor information**

|                   |                     |
|-------------------|---------------------|
| Mass:             | 1728.78429          |
| m/z:              | System.Collections. |
| Charge:           | System.Collections. |
| Retentiontime:    | System.Collections. |
| Score:            | 128.7632            |
| Mass Error [ppm]: | -0.48852            |
| PEP:              | 0.0018507           |
| Precursor Type:   | ISO                 |

| b <sup>2+</sup> ion |          | b ion     |          |    |     |    | γ ion    |           | γ <sup>2+</sup> ion |           |
|---------------------|----------|-----------|----------|----|-----|----|----------|-----------|---------------------|-----------|
| Δ dalton            | mass     | Δ dalton  | mass     |    | seq |    | Δ dalton | mass      | Δ dalton            | mass      |
|                     | 116.0342 |           | 116.0342 | 1  | D   | 13 |          |           |                     |           |
|                     | 229.1183 |           | 229.1183 | 2  | I   | 12 | 1614.765 |           | 1614.765            |           |
|                     | 286.1397 |           | 286.1397 | 3  | G   | 11 | 1501.681 |           | 1501.681            |           |
|                     | 453.1381 |           | 453.1381 | 4  | S   | 10 | 1444.66  |           | 722.8336            | +0.017773 |
|                     | 566.2222 |           | 566.2222 | 5  | I   | 9  | 1277.662 | -0.044878 | 639.3344            | -0.134903 |
|                     | 729.2855 |           | 729.2855 | 6  | Y   | 8  | 1164.578 | -0.062499 | 582.7924            | -0.084814 |
|                     | 892.3488 |           | 892.3488 | 7  | Y   | 7  | 1001.514 | -0.066858 | 1001.514            |           |
|                     | 979.3809 |           | 979.3809 | 8  | S   | 6  | 838.4509 | -0.349355 | 838.4509            |           |
|                     | 1135.482 |           | 1135.482 | 9  | R   | 5  | 751.4188 |           | 751.4188            |           |
|                     | 1234.55  | +0.08292  | 1234.55  | 10 | V   | 4  | 595.3177 | -0.116667 | 595.3177            |           |
|                     | 1331.603 |           | 1331.603 | 11 | P   | 3  | 496.2493 | +0.032985 | 496.2493            |           |
|                     | 1460.646 | +0.183486 | 1460.646 | 12 | E   | 2  | 399.1965 |           | 399.1965            |           |
| -0.22212            | 788.34   | +0.461963 | 1575.673 | 13 | D   | 1  | 270.1539 | +0.023819 | 270.1539            |           |
|                     |          |           |          | 14 | K   | 0  | 155.127  |           | 155.127             |           |

**general information**

|                       |           |
|-----------------------|-----------|
| Annotation:           | 11 of 14  |
| AminoAcids Coverage:  | 79 %      |
| Intensity Coverage:   | 42 %      |
| Protein Localisation: | 60 ... 73 |

Source: 201205213\_VR\_Bsu\_TriplesILACrep1\_pL2ESLS\_F04  
 Scannumber: 14214  
 Protein: BSU04670; rsbR; rsbRA; ycxR  
 Peptide Score: 66.28  
 Method: ITMS; CID; 3

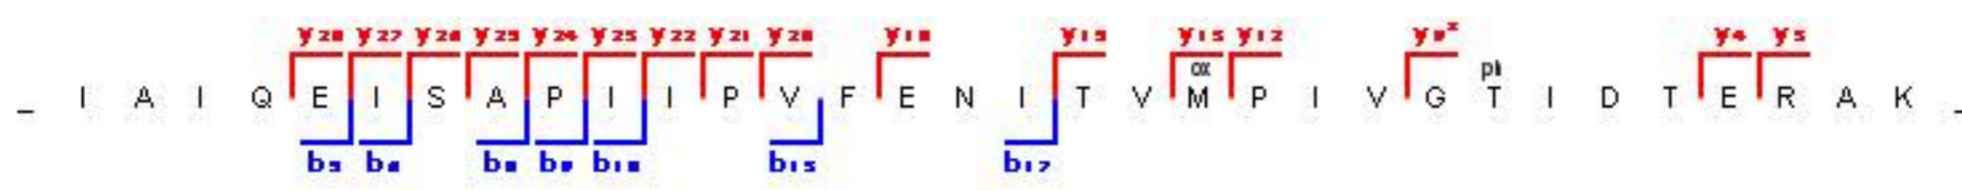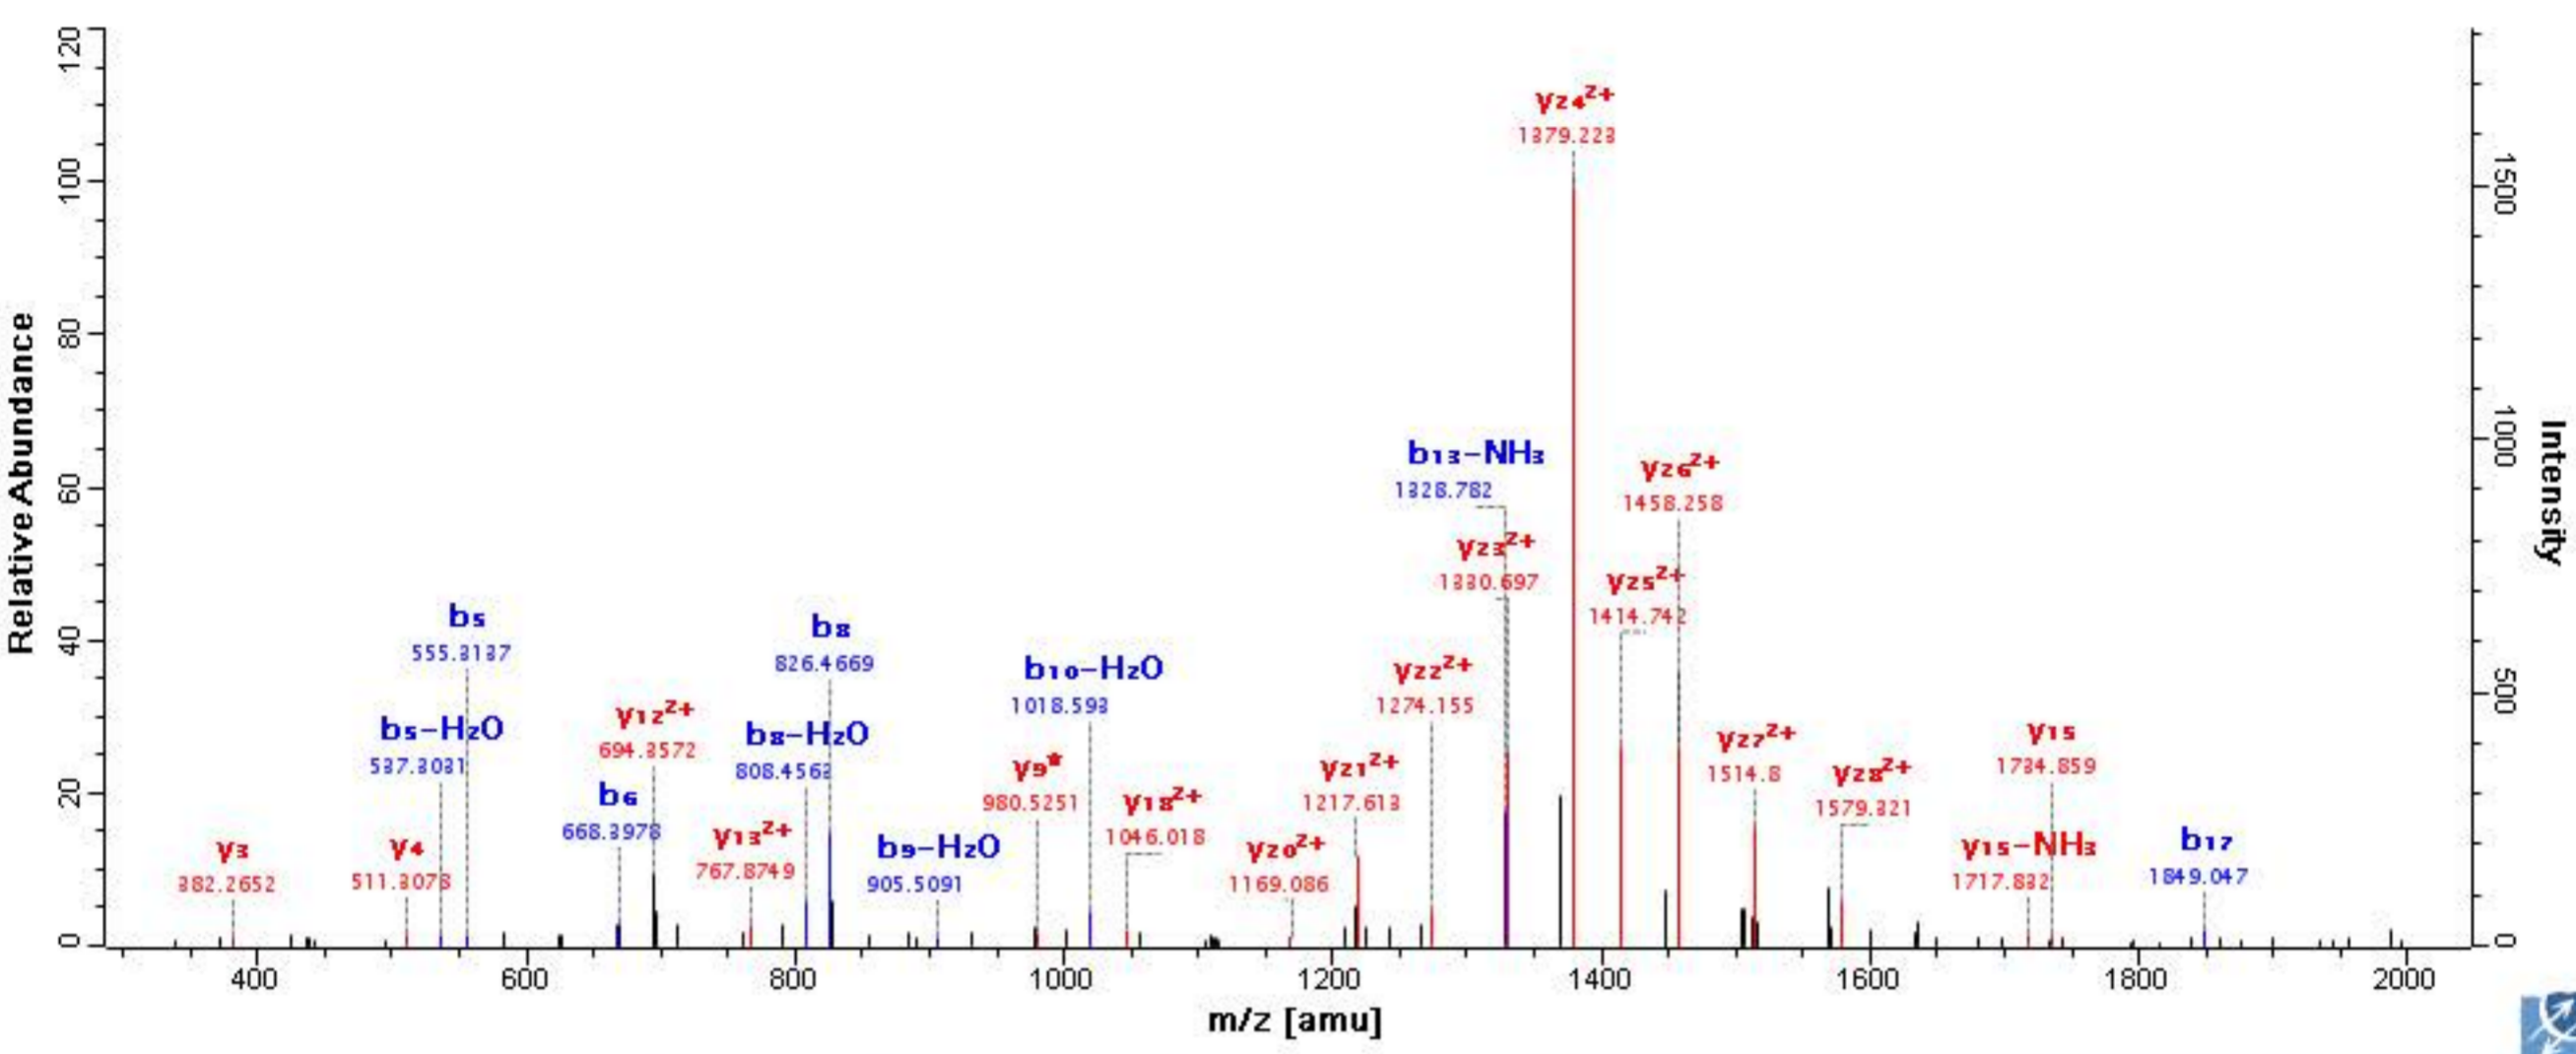

**precursor information**

|                   |                     |
|-------------------|---------------------|
| Mass:             | 3573.87849          |
| m/z:              | System.Collections. |
| Charge:           | System.Collections. |
| Retentiontime:    | System.Collections. |
| Score:            | 66.2815             |
| Mass Error [ppm]: | 0.43682             |
| PEP:              | 0.00023807          |
| Precursor Type:   | MULTI               |

| b ion      |              | seq |   |    | y ion        |            | y <sup>2+</sup> ion |            |
|------------|--------------|-----|---|----|--------------|------------|---------------------|------------|
| Δ dalton   | mass         |     |   |    | Δ dalton     | mass       | Δ dalton            | mass       |
|            | 114.09134045 | 1   | I | 31 |              |            |                     |            |
|            | 185.12845423 | 2   | A | 30 | 3469.8143349 |            | 3469.8143349        |            |
|            | 298.21251822 | 3   | I | 29 | 3398.7772211 |            | 3398.7772211        |            |
|            | 426.27109573 | 4   | Q | 28 | 3285.6931572 |            | 3285.6931572        |            |
| -0.0585008 | 555.31368882 | 5   | E | 27 | 3157.6345797 |            | 1579.3209281        | -0.0762992 |
| -0.1135731 | 668.3977528  | 6   | I | 26 | 3028.5919866 |            | 1514.7996315        | -0.2089333 |
|            | 755.42978121 | 7   | S | 25 | 2915.5079226 |            | 1458.2575995        | +0.1487725 |
| -0.0412969 | 826.466895   | 8   | A | 24 | 2828.4758942 |            | 1414.7415853        | +0.2375407 |
|            | 923.51965885 | 9   | P | 23 | 2757.4387804 |            | 1379.2230284        | +0.1264589 |
|            | 1036.6037228 | 10  | I | 22 | 2660.3860165 |            | 1330.6966465        | -0.4998692 |
|            | 1149.6877868 | 11  | I | 21 | 2547.3019525 |            | 1274.1546145        | -0.3090335 |
|            | 1246.7405507 | 12  | P | 20 | 2434.2178886 |            | 1217.6125825        | +0.3138091 |
|            | 1345.8089646 | 13  | V | 19 | 2337.1651247 |            | 1169.0862006        | -0.3515814 |
|            | 1492.8773785 | 14  | F | 18 | 2238.0967108 |            | 2238.0967108        |            |
|            | 1621.9199716 | 15  | E | 17 | 2091.0282969 |            | 1046.0177867        | +0.3085073 |
|            | 1735.962899  | 16  | N | 16 | 1961.9857038 |            | 1961.9857038        |            |
| +0.1280858 | 1849.046963  | 17  | I | 15 | 1847.9427763 |            | 1847.9427763        |            |
|            | 1950.0946415 | 18  | T | 14 | 1734.8587124 | -0.1436245 | 1734.8587124        |            |
|            | 2049.1630554 | 19  | V | 13 | 1633.8110339 |            | 1633.8110339        |            |
|            | 2196.1984546 | 20  | M | 12 | 1534.74262   |            | 767.87494822        | -0.2957246 |
|            | 2293.2512185 | 21  | P | 11 | 1387.7072207 |            | 694.3572486         | +0.1875512 |
|            | 2406.3352825 | 22  | I | 10 | 1290.6544569 |            | 1290.6544569        |            |
|            | 2505.4036964 | 23  | V | 9  | 1177.5703929 |            | 1177.5703929        |            |
|            | 2562.4251601 | 24  | G | 8  | 1078.501979  |            | 1078.501979         |            |
|            | 2743.439169  | 25  | T | 7  | 1021.4805153 |            | 1021.4805153        |            |
|            | 2856.523233  | 26  | I | 6  | 840.46650638 |            | 840.46650638        |            |
|            | 2971.550176  | 27  | D | 5  | 727.3824424  |            | 727.3824424         |            |
|            | 3072.5978545 | 28  | T | 4  | 612.35549937 |            | 612.35549937        |            |
|            | 3201.6404476 | 29  | E | 3  | 511.3078209  | +0.0892128 | 511.3078209         |            |
|            | 3357.7415586 | 30  | R | 2  | 382.2652278  | -0.0749812 | 382.2652278         |            |
|            | 3428.7786724 | 31  | A | 1  | 226.16411677 |            | 226.16411677        |            |
|            |              | 32  | K | 0  | 155.12700298 |            | 155.12700298        |            |

**general information**

|                       |             |
|-----------------------|-------------|
| Annotation:           | 20 of 32    |
| AminoAcids Coverage:  | 62 %        |
| Intensity Coverage:   | 47 %        |
| Protein Localisation: | 144 ... 175 |



Source: 201205213\_VR\_Bsu\_TripleSILACrep1\_pL2ESLS\_F04  
 Scannumber: 7050  
 Protein: BSU27320; greA  
 Peptide Score: 85.23  
 Method: ITMS; CID; 3

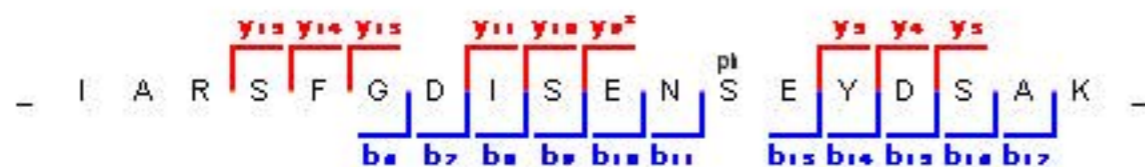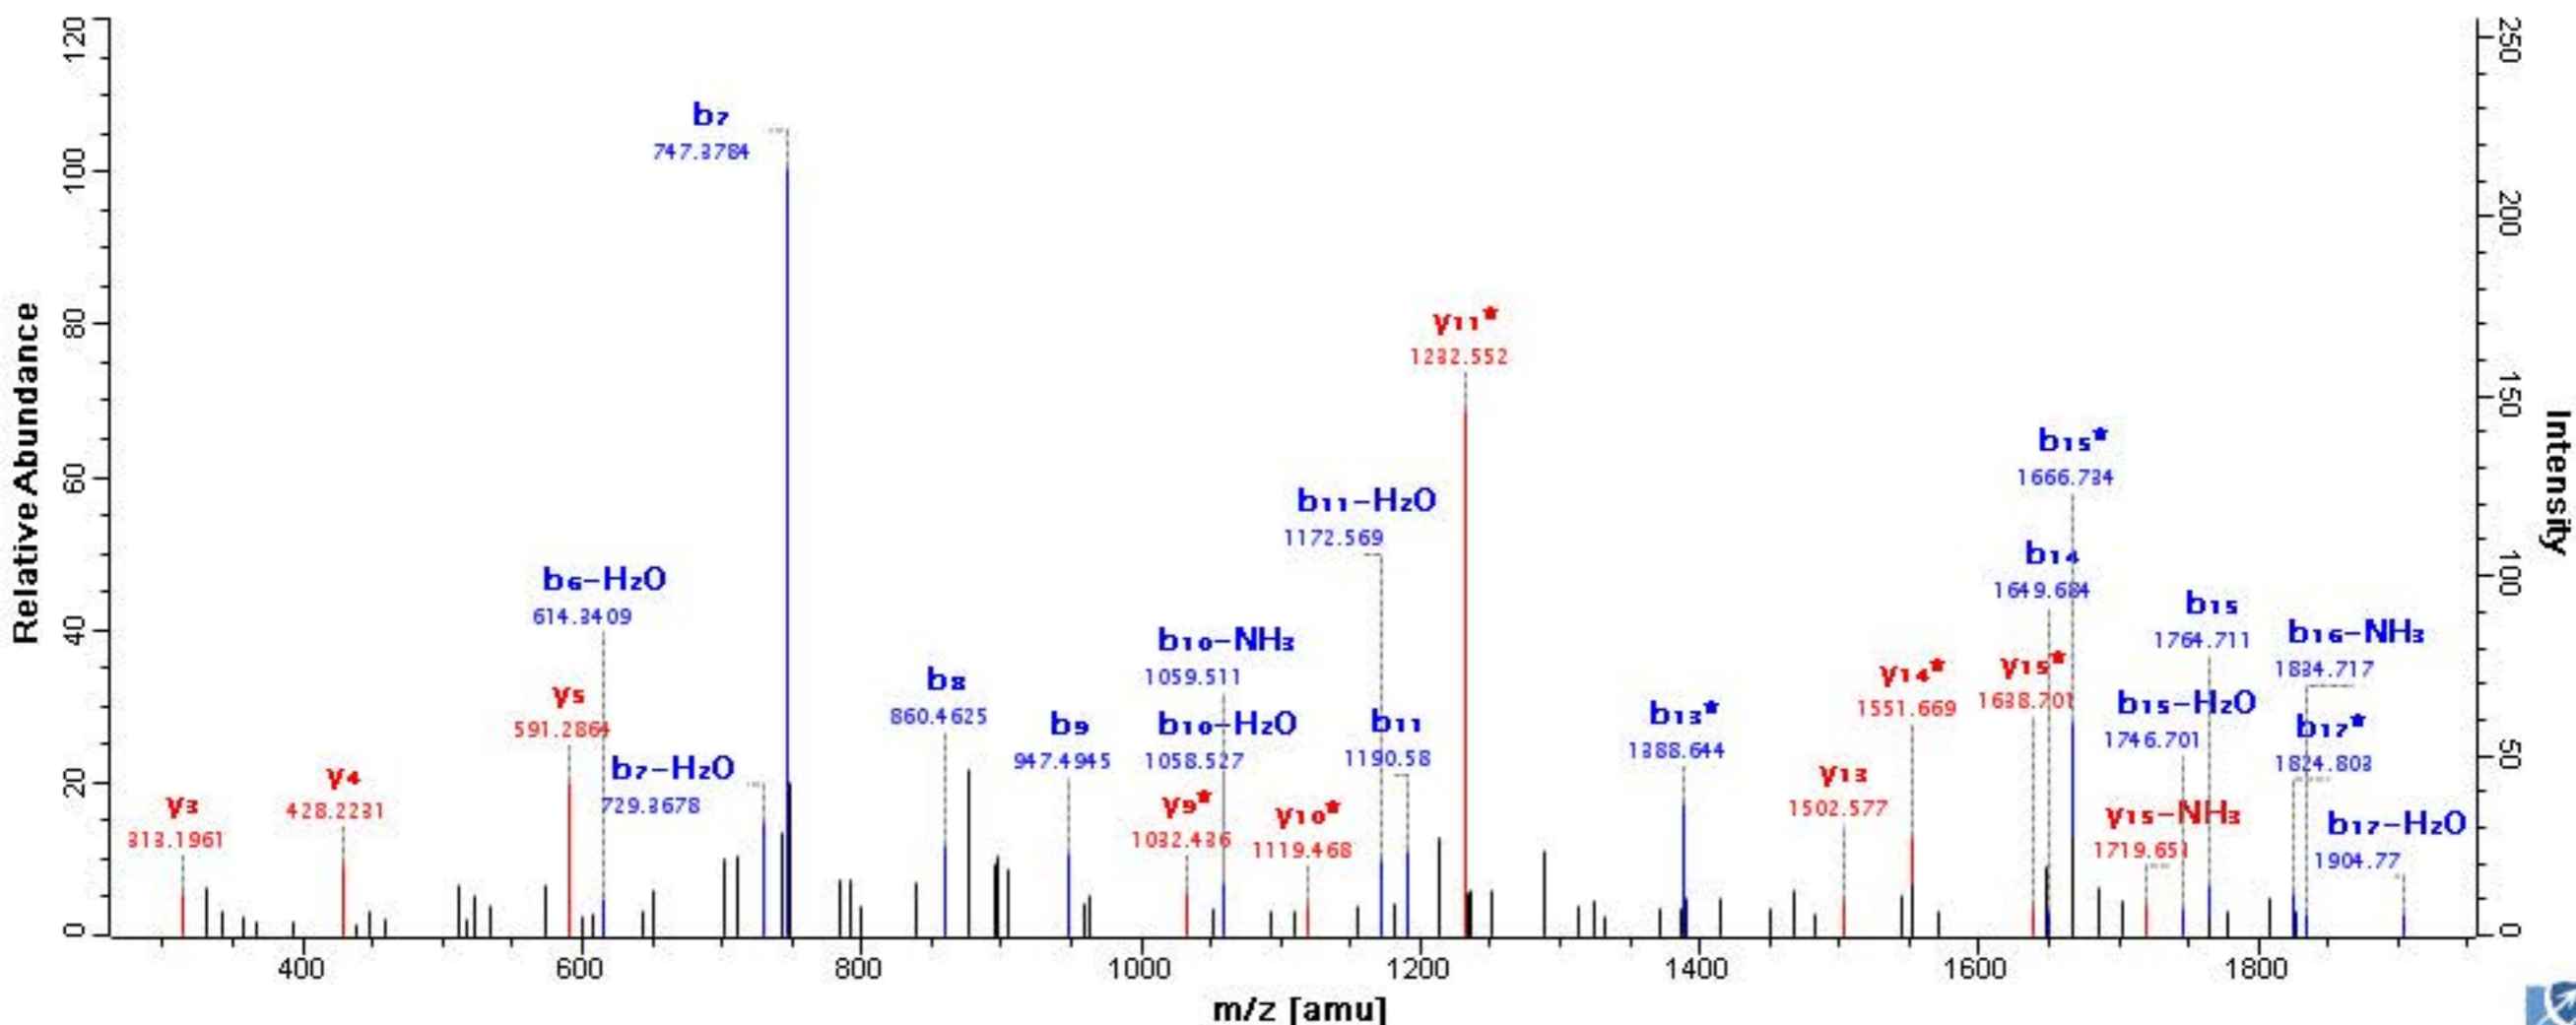

#### precursor information

|                   |                     |
|-------------------|---------------------|
| Mass:             | 2067.87908          |
| m/z:              | System.Collections. |
| Charge:           | System.Collections. |
| Retentiontime:    | System.Collections. |
| Score:            | 85.23125            |
| Mass Error [ppm]: | 0.2078              |
| PEP:              | 0.00083387          |
| Precursor Type:   | MULTI               |

#### general information

|                       |           |
|-----------------------|-----------|
| Annotation:           | 13 of 18  |
| AminoAcids Coverage:  | 72 %      |
| Intensity Coverage:   | 51 %      |
| Protein Localisation: | 38 ... 55 |

| b ion      |                | seq |   |    |                | gamma ion  |  |
|------------|----------------|-----|---|----|----------------|------------|--|
| Δ dalton   | mass           |     |   |    | Δ dalton       | mass       |  |
|            | 114.091340447  | 1   | I | 17 |                |            |  |
|            | 185.128454235  | 2   | A | 16 | 1963.816055498 |            |  |
|            | 341.229565263  | 3   | R | 15 | 1892.77894171  |            |  |
|            | 428.261593673  | 4   | S | 14 | 1736.677830682 |            |  |
|            | 575.330007589  | 5   | F | 13 | 1649.645802272 |            |  |
|            | 632.351471313  | 6   | G | 12 | 1502.577388356 | +0.0355267 |  |
| -0.0250208 | 747.378414345  | 7   | D | 11 | 1445.555924632 |            |  |
| +0.1608127 | 860.462478325  | 8   | I | 10 | 1330.5289816   |            |  |
| +0.1110841 | 947.494506735  | 9   | S | 9  | 1217.44491762  |            |  |
|            | 1076.537099831 | 10  | E | 8  | 1130.41288921  |            |  |
| -0.0794169 | 1190.580027278 | 11  | N | 7  | 1001.370296113 |            |  |
|            | 1357.578386097 | 12  | S | 6  | 887.327368666  |            |  |
|            | 1486.620979193 | 13  | E | 5  | 720.329009848  |            |  |
| -0.0107237 | 1649.684307731 | 14  | Y | 4  | 591.286416752  | -0.0275056 |  |
| +0.1418987 | 1764.711250763 | 15  | D | 3  | 428.223088213  | -0.0825853 |  |
|            | 1851.743279173 | 16  | S | 2  | 313.196145181  | +0.1137303 |  |
|            | 1922.780392961 | 17  | A | 1  | 226.164116772  |            |  |
|            |                | 18  | K | 0  | 155.127002984  |            |  |

Source: 201205213\_VR\_Bsu\_TripleSILACrep1\_pL2ESLS\_F04  
 Scannumber: 8025  
 Protein: azoR2; BSU33540; yvaB  
 Peptide Score: 186.72  
 Method: ITMS; CID; 3

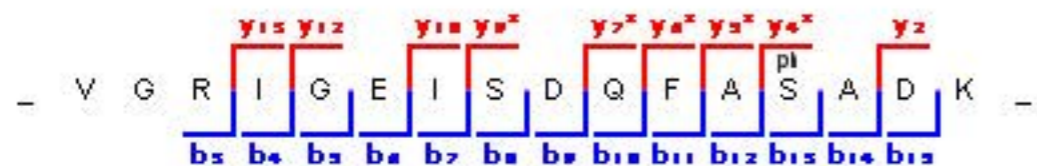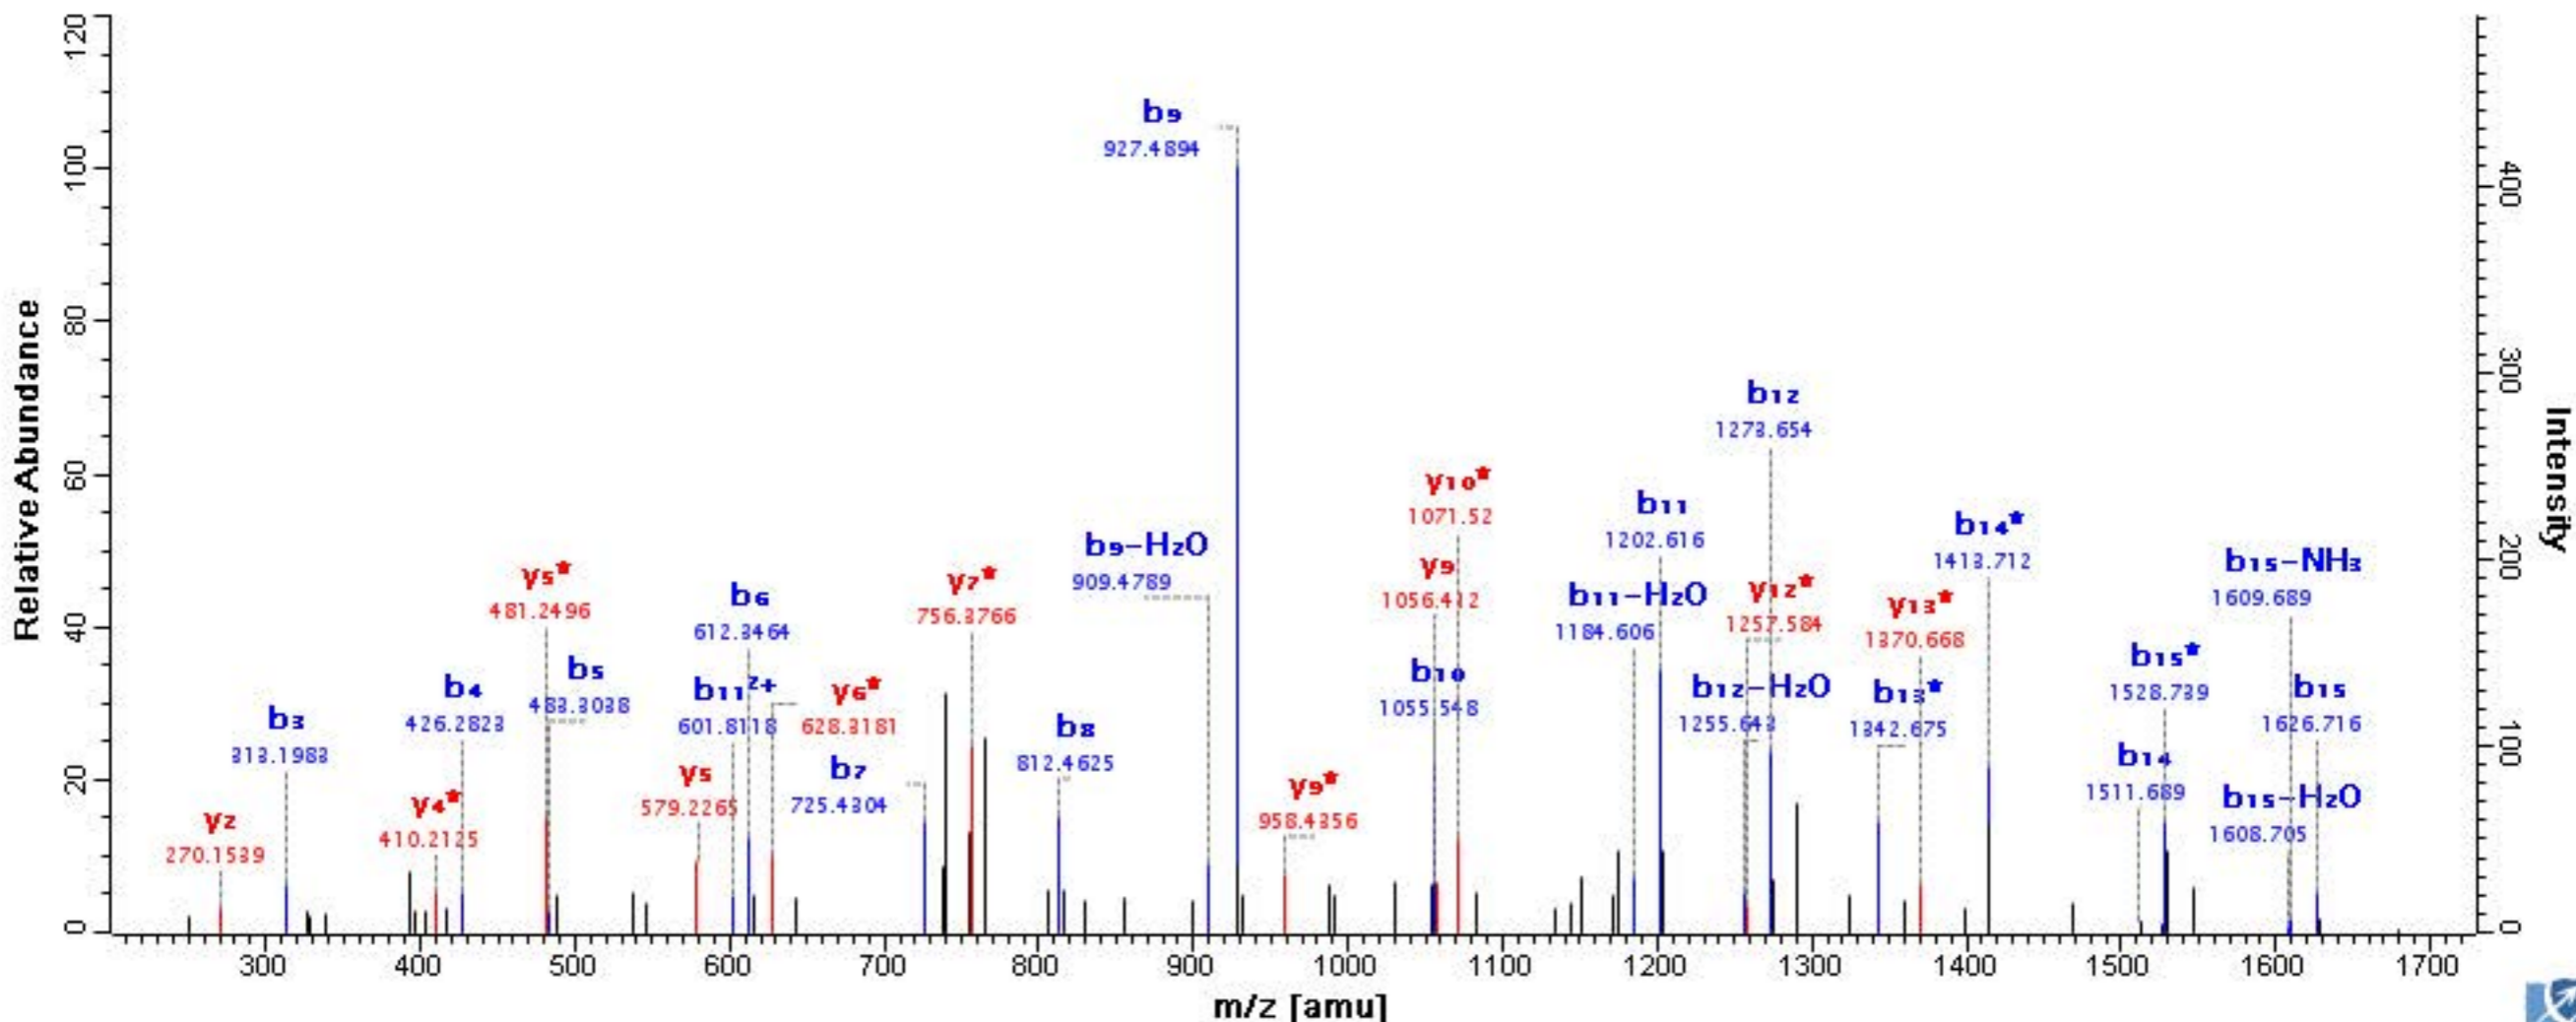

#### precursor information

|                   |                     |
|-------------------|---------------------|
| Mass:             | 1771.81379          |
| m/z:              | System.Collections. |
| Charge:           | System.Collections. |
| Retentiontime:    | System.Collections. |
| Score:            | 186.7174            |
| Mass Error [ppm]: | -0.22938            |
| PEP:              | 1.9424E-35          |
| Precursor Type:   | MULTI               |

#### general information

|                       |           |
|-----------------------|-----------|
| Annotation:           | 13 of 16  |
| AminoAcids Coverag    | 81 %      |
| Intensity Coverage:   | 58 %      |
| Protein Localisation: | 80 ... 95 |

| b <sup>2+</sup> ion |              | b ion      |              |     | y ion |          |              |
|---------------------|--------------|------------|--------------|-----|-------|----------|--------------|
| Δ dalton            | mass         | Δ dalton   | mass         | seq |       | Δ dalton | mass         |
|                     | 100.07569038 |            | 100.07569038 | 1   | V     | 15       |              |
|                     | 157.09715411 |            | 157.09715411 | 2   | G     | 14       | 1681.7672548 |
|                     | 313.19826513 | +0.1044998 | 313.19826513 | 3   | R     | 13       | 1624.7457911 |
|                     | 426.28232911 | +0.1131787 | 426.28232911 | 4   | I     | 12       | 1468.6446801 |
|                     | 483.30379284 | -0.1144007 | 483.30379284 | 5   | G     | 11       | 1355.5606161 |
|                     | 612.34638593 | -0.263195  | 612.34638593 | 6   | E     | 10       | 1298.5391524 |
|                     | 725.43044992 | +0.1051336 | 725.43044992 | 7   | I     | 9        | 1169.4965593 |
|                     | 812.46247832 | +0.1755832 | 812.46247832 | 8   | S     | 8        | 1056.4124953 |
|                     | 927.48942136 | +0.032063  | 927.48942136 | 9   | D     | 7        | 969.38046687 |
|                     | 1055.5479989 | -0.1550545 | 1055.5479989 | 10  | Q     | 6        | 854.35352384 |
| -0.3372963          | 601.81184463 | -0.1728093 | 1202.6164128 | 11  | F     | 5        | 726.29494633 |
|                     | 1273.6535266 | -0.0130236 | 1273.6535266 | 12  | A     | 4        | 579.22653241 |
|                     | 1440.6518854 |            | 1440.6518854 | 13  | S     | 3        | 508.18941862 |
|                     | 1511.6889992 | +0.4222069 | 1511.6889992 | 14  | A     | 2        | 341.1910598  |
|                     | 1626.7159422 | +0.1218263 | 1626.7159422 | 15  | D     | 1        | 270.15394602 |
|                     |              |            |              | 16  | K     | 0        | 155.12700298 |

Source: 201205213\_VR\_Bsu\_TripleSILACrep1\_pL2ESLS\_F04  
 Scannumber: 8766  
 Protein: BSU33940; gap; gapA  
 Peptide Score: 100.28  
 Method: ITMS; CID; 3

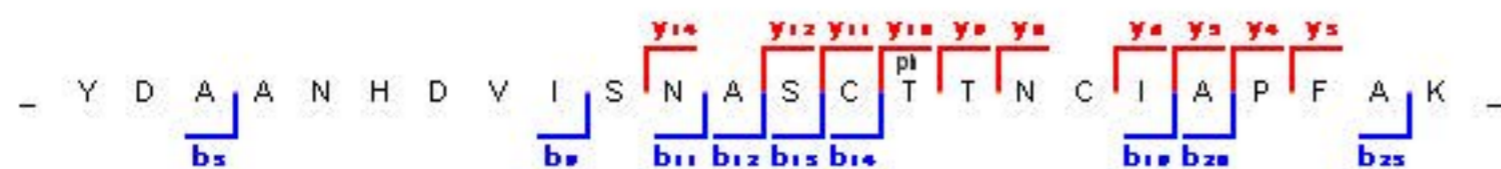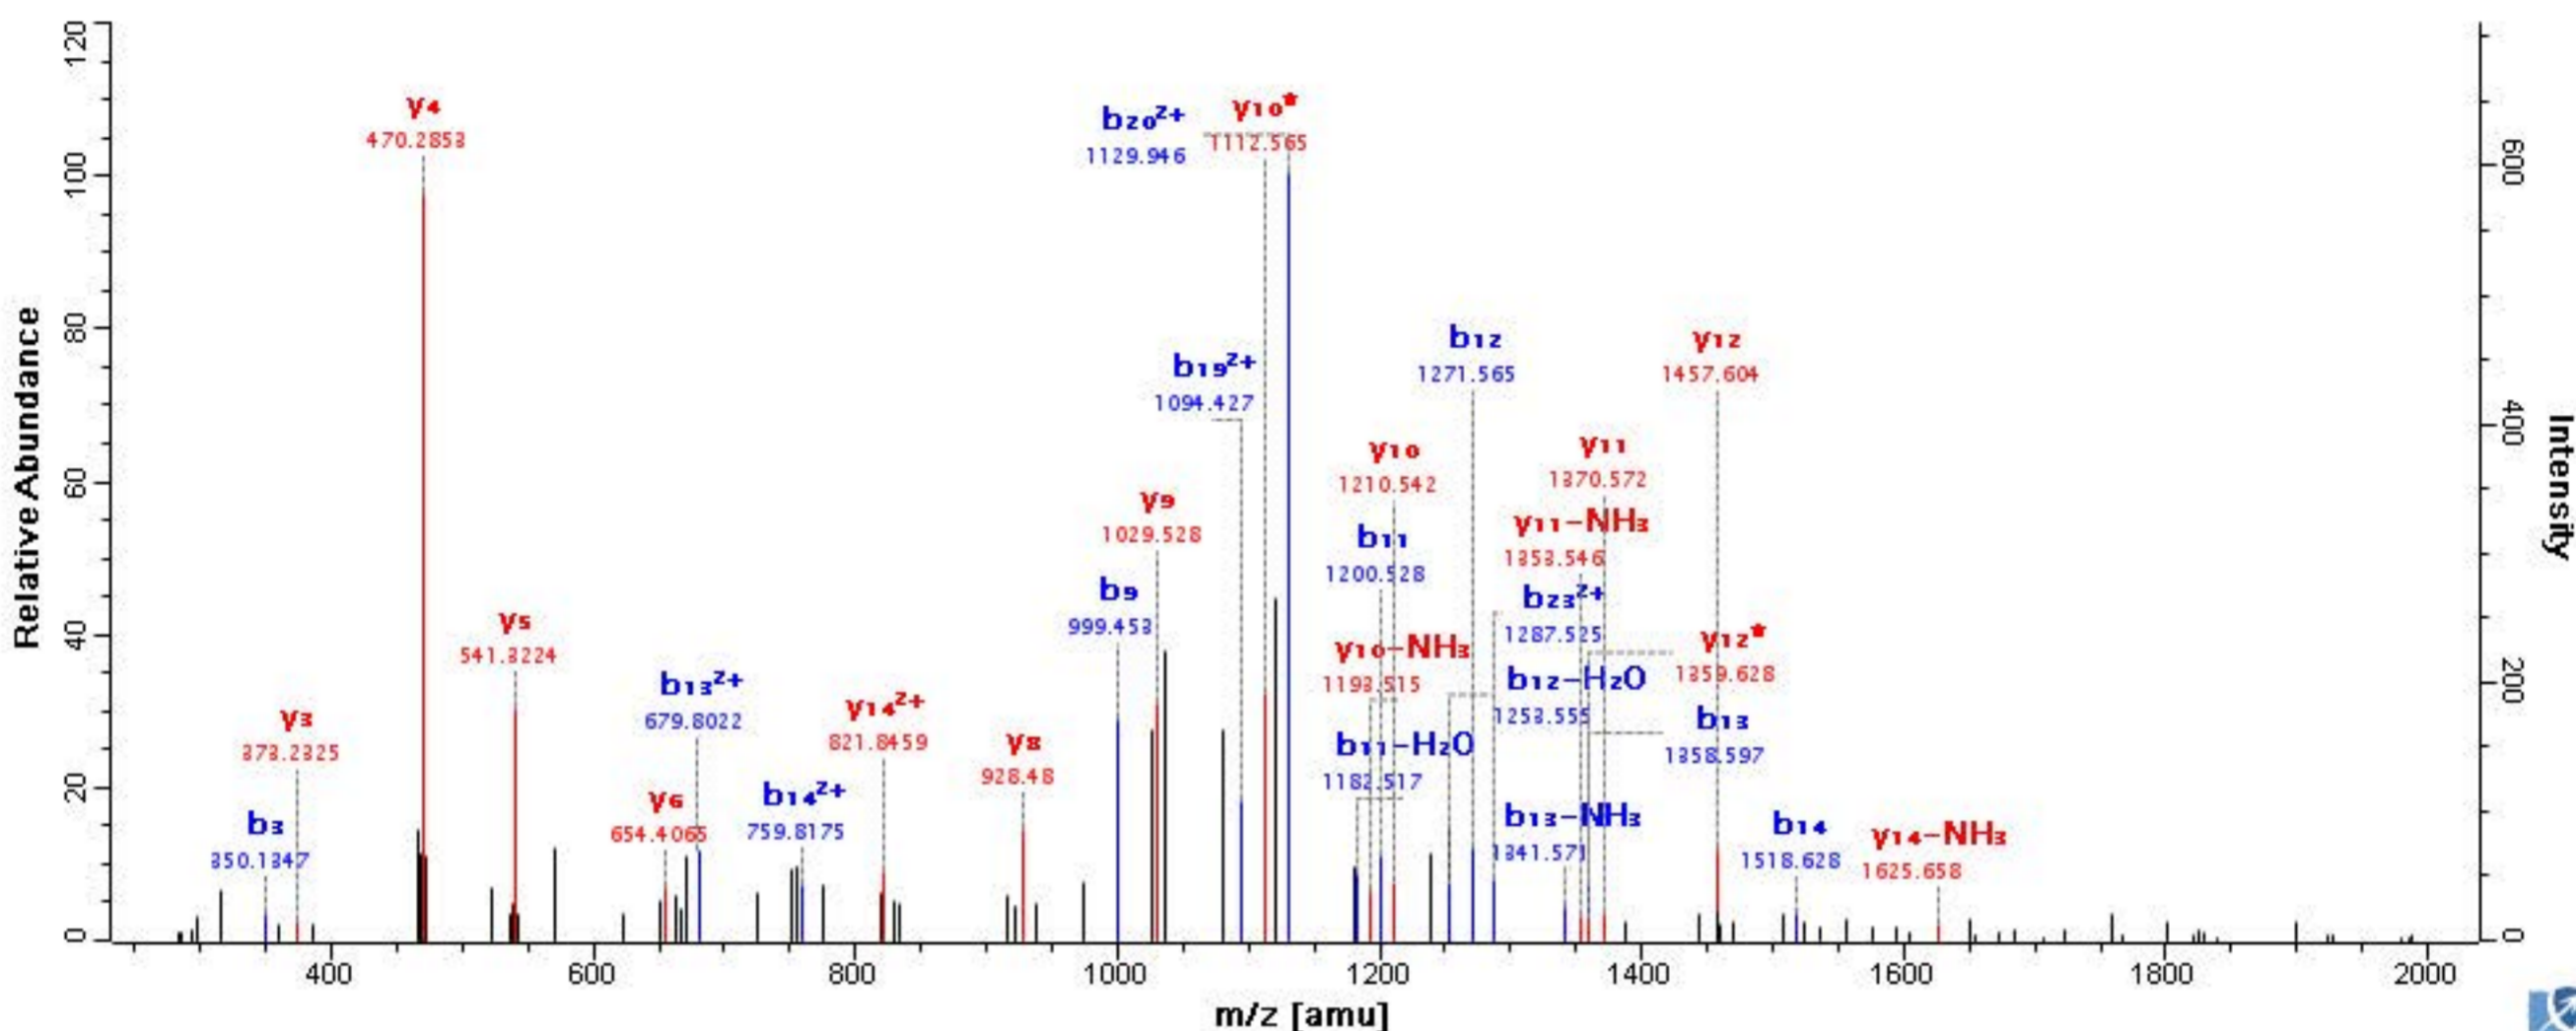

#### precursor information

|                   |                     |
|-------------------|---------------------|
| Mass:             | 2727.15236          |
| m/z:              | System.Collections. |
| Charge:           | System.Collections. |
| Retentiontime:    | System.Collections. |
| Score:            | 100.282             |
| Mass Error [ppm]: | -0.95608            |
| PEP:              | 1.9406E-07          |
| Precursor Type:   | ISO                 |

| b <sup>2+</sup> ion |          | b ion     |          | seq |   |    | y ion    |           | y <sup>2+</sup> ion |           |
|---------------------|----------|-----------|----------|-----|---|----|----------|-----------|---------------------|-----------|
| Δ dalton            | mass     | Δ dalton  | mass     |     |   |    | Δ dalton | mass      | Δ dalton            | mass      |
|                     | 164.0706 |           | 164.0706 | 1   | Y | 23 |          |           |                     |           |
|                     | 279.0975 |           | 279.0975 | 2   | D | 22 | 2565.099 |           | 2565.099            |           |
|                     | 350.1347 | -0.046344 | 350.1347 | 3   | A | 21 | 2450.072 |           | 2450.072            |           |
|                     | 421.1718 |           | 421.1718 | 4   | A | 20 | 2379.035 |           | 2379.035            |           |
|                     | 535.2147 |           | 535.2147 | 5   | N | 19 | 2307.998 |           | 2307.998            |           |
|                     | 672.2736 |           | 672.2736 | 6   | H | 18 | 2193.955 |           | 2193.955            |           |
|                     | 787.3006 |           | 787.3006 | 7   | D | 17 | 2056.896 |           | 2056.896            |           |
|                     | 886.369  |           | 886.369  | 8   | V | 16 | 1941.869 |           | 1941.869            |           |
|                     | 999.453  | -0.110323 | 999.453  | 9   | I | 15 | 1842.801 |           | 1842.801            |           |
|                     | 1086.485 |           | 1086.485 | 10  | S | 14 | 1729.716 |           | 1729.716            |           |
|                     | 1200.528 | -0.026405 | 1200.528 | 11  | N | 13 | 1642.684 |           | 821.8459            | +0.018149 |
|                     | 1271.565 | +0.040485 | 1271.565 | 12  | A | 12 | 1528.642 |           | 1528.642            |           |
| +0.279094           | 679.8022 | +0.075351 | 1358.597 | 13  | S | 11 | 1457.604 | -0.083904 | 1457.604            |           |
| +0.085852           | 759.8175 | -0.168676 | 1518.628 | 14  | C | 10 | 1370.572 | +0.164067 | 1370.572            |           |
|                     | 1699.642 |           | 1699.642 | 15  | T | 9  | 1210.542 | -0.054675 | 1210.542            |           |
|                     | 1800.689 |           | 1800.689 | 16  | T | 8  | 1029.528 | -0.010026 | 1029.528            |           |
|                     | 1914.732 |           | 1914.732 | 17  | N | 7  | 928.48   | -0.095526 | 928.48              |           |
|                     | 2074.763 |           | 2074.763 | 18  | C | 6  | 814.4371 |           | 814.4371            |           |
| +0.241508           | 1094.427 |           | 2187.847 | 19  | I | 5  | 654.4065 | +0.082175 | 654.4065            |           |
| +0.290334           | 1129.946 |           | 2258.884 | 20  | A | 4  | 541.3224 | -0.026266 | 541.3224            |           |
|                     | 2355.937 |           | 2355.937 | 21  | P | 3  | 470.2853 | +0.091048 | 470.2853            |           |
|                     | 2503.005 |           | 2503.005 | 22  | F | 2  | 373.2325 | -0.005053 | 373.2325            |           |
| -0.1466             | 1287.525 |           | 2574.043 | 23  | A | 1  | 226.1641 |           | 226.1641            |           |
|                     |          |           |          | 24  | K | 0  | 155.127  |           | 155.127             |           |

#### general information

|                       |             |
|-----------------------|-------------|
| Annotation:           | 15 of 24    |
| AminoAcids Coverag    | 62 %        |
| Intensity Coverage:   | 54 %        |
| Protein Localisation: | 139 ... 162 |

Source: 201205213\_VR\_Bsu\_TripleSILACrep1\_pL2ESLS\_F04  
 Scannumber: 9589  
 Protein: BSU32250; thrC  
 Peptide Score: 218.66  
 Method: ITMS; CID; 3

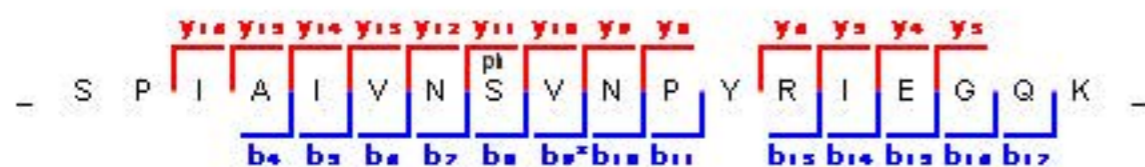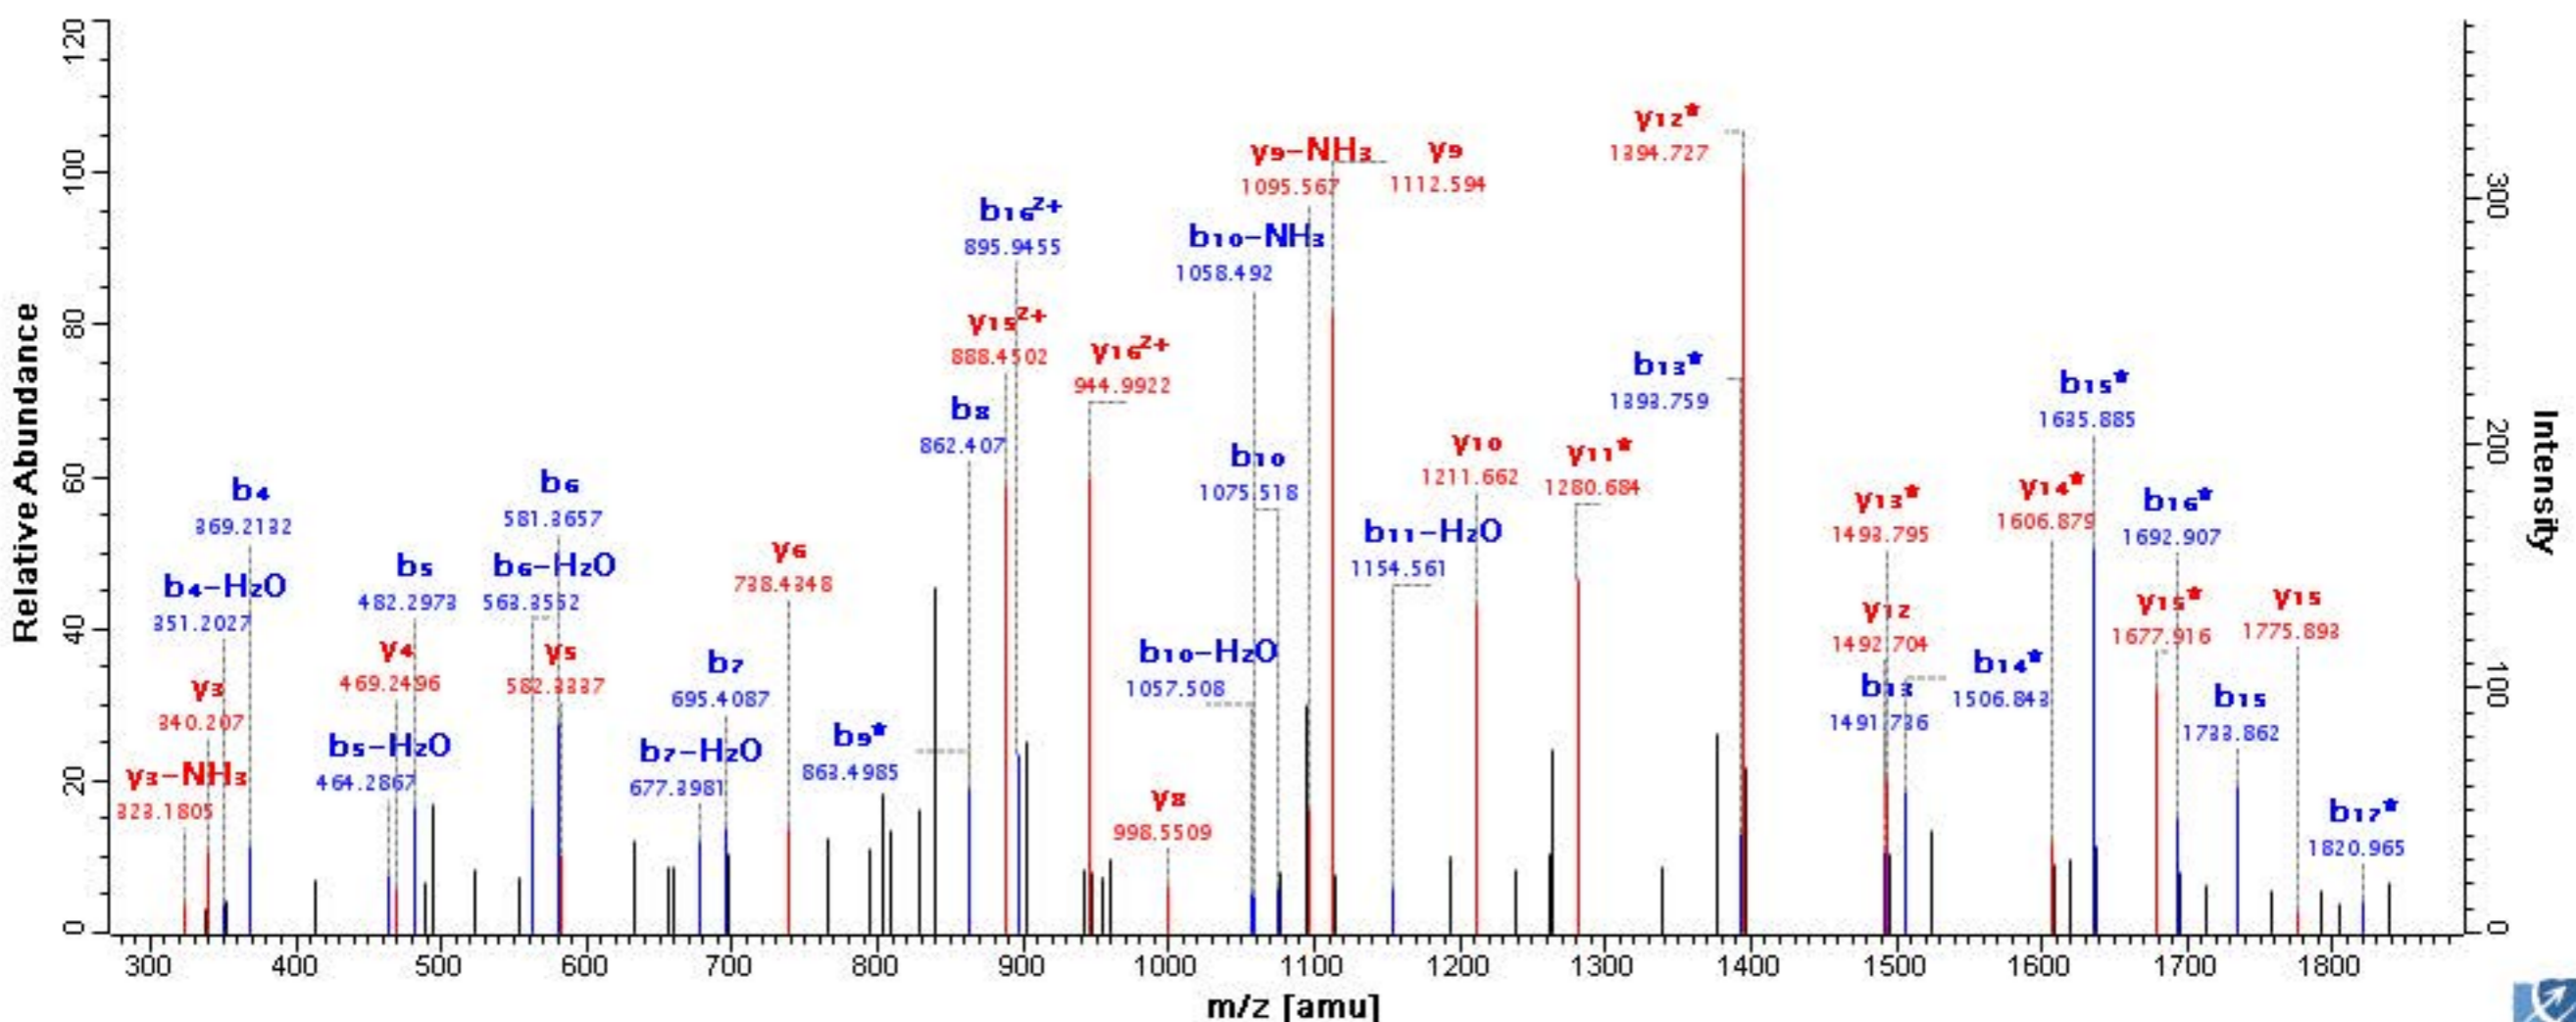

#### precursor information

|                   |                     |
|-------------------|---------------------|
| Mass:             | 2072.05444          |
| m/z:              | System.Collections. |
| Charge:           | System.Collections. |
| Retentiontime:    | System.Collections. |
| Score:            | 218.6631            |
| Mass Error [ppm]: | -0.12782            |
| PEP:              | 8.0128E-130         |
| Precursor Type:   | ISO                 |

#### general information

|                       |             |
|-----------------------|-------------|
| Annotation:           | 14 of 18    |
| AminoAcids Coverag    | 78 %        |
| Intensity Coverage:   | 61 %        |
| Protein Localisation: | 146 ... 163 |

| b <sup>2+</sup> ion |          | b ion     |          | seq |   |    | γ ion    |           | γ <sup>2+</sup> ion |           |
|---------------------|----------|-----------|----------|-----|---|----|----------|-----------|---------------------|-----------|
| Δ dalton            | mass     | Δ dalton  | mass     |     |   |    | Δ dalton | mass      | Δ dalton            | mass      |
|                     | 88.0393  |           | 88.0393  | 1   | S | 17 |          |           |                     |           |
|                     | 185.0921 |           | 185.0921 | 2   | P | 16 | 1986.03  |           | 1986.03             |           |
|                     | 298.1761 |           | 298.1761 | 3   | I | 15 | 1888.977 |           | 944.9922            | -0.040328 |
|                     | 369.2132 | -0.007772 | 369.2132 | 4   | A | 14 | 1775.893 | +0.154972 | 888.4502            | +0.190059 |
|                     | 482.2973 | -0.156502 | 482.2973 | 5   | I | 13 | 1704.856 |           | 1704.856            |           |
|                     | 581.3657 | -0.225221 | 581.3657 | 6   | V | 12 | 1591.772 |           | 1591.772            |           |
|                     | 695.4087 | +0.051858 | 695.4087 | 7   | N | 11 | 1492.704 | +0.468953 | 1492.704            |           |
|                     | 862.407  | +0.249728 | 862.407  | 8   | S | 10 | 1378.661 |           | 1378.661            |           |
|                     | 961.4754 |           | 961.4754 | 9   | V | 9  | 1211.662 | +0.021348 | 1211.662            |           |
|                     | 1075.518 | -0.199871 | 1075.518 | 10  | N | 8  | 1112.594 | -0.033163 | 1112.594            |           |
|                     | 1172.571 |           | 1172.571 | 11  | P | 7  | 998.5509 | +0.244994 | 998.5509            |           |
|                     | 1335.634 |           | 1335.634 | 12  | Y | 6  | 901.4981 |           | 901.4981            |           |
|                     | 1491.736 | +0.451334 | 1491.736 | 13  | R | 5  | 738.4348 | -0.030882 | 738.4348            |           |
|                     | 1604.82  |           | 1604.82  | 14  | I | 4  | 582.3337 | -0.050681 | 582.3337            |           |
|                     | 1733.862 | -0.116729 | 1733.862 | 15  | E | 3  | 469.2496 | +0.147457 | 469.2496            |           |
| +0.271931           | 895.9455 |           | 1790.884 | 16  | G | 2  | 340.207  | +0.051592 | 340.207             |           |
|                     | 1918.942 |           | 1918.942 | 17  | Q | 1  | 283.1856 |           | 283.1856            |           |
|                     |          |           |          | 18  | K | 0  | 155.127  |           | 155.127             |           |

Source: 201205213\_VR\_Bsu\_TripleSILACrep1\_pL2ESLS\_F05  
 Scannumber: 10921  
 Protein: BSU37660; ipa-88d; pta; ywf  
 Peptide Score: 119.62  
 Method: ITMS; CID; 3

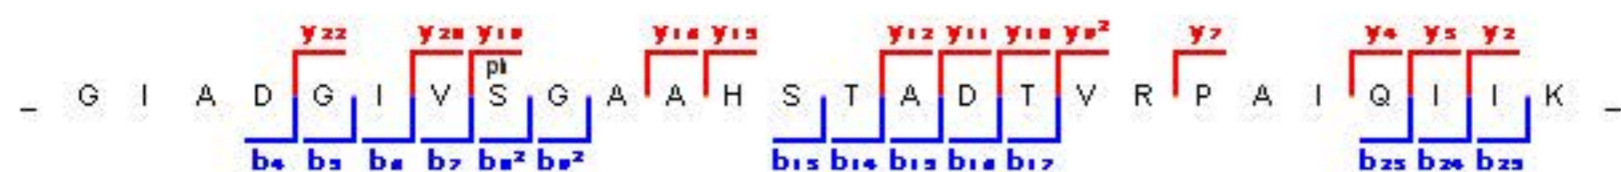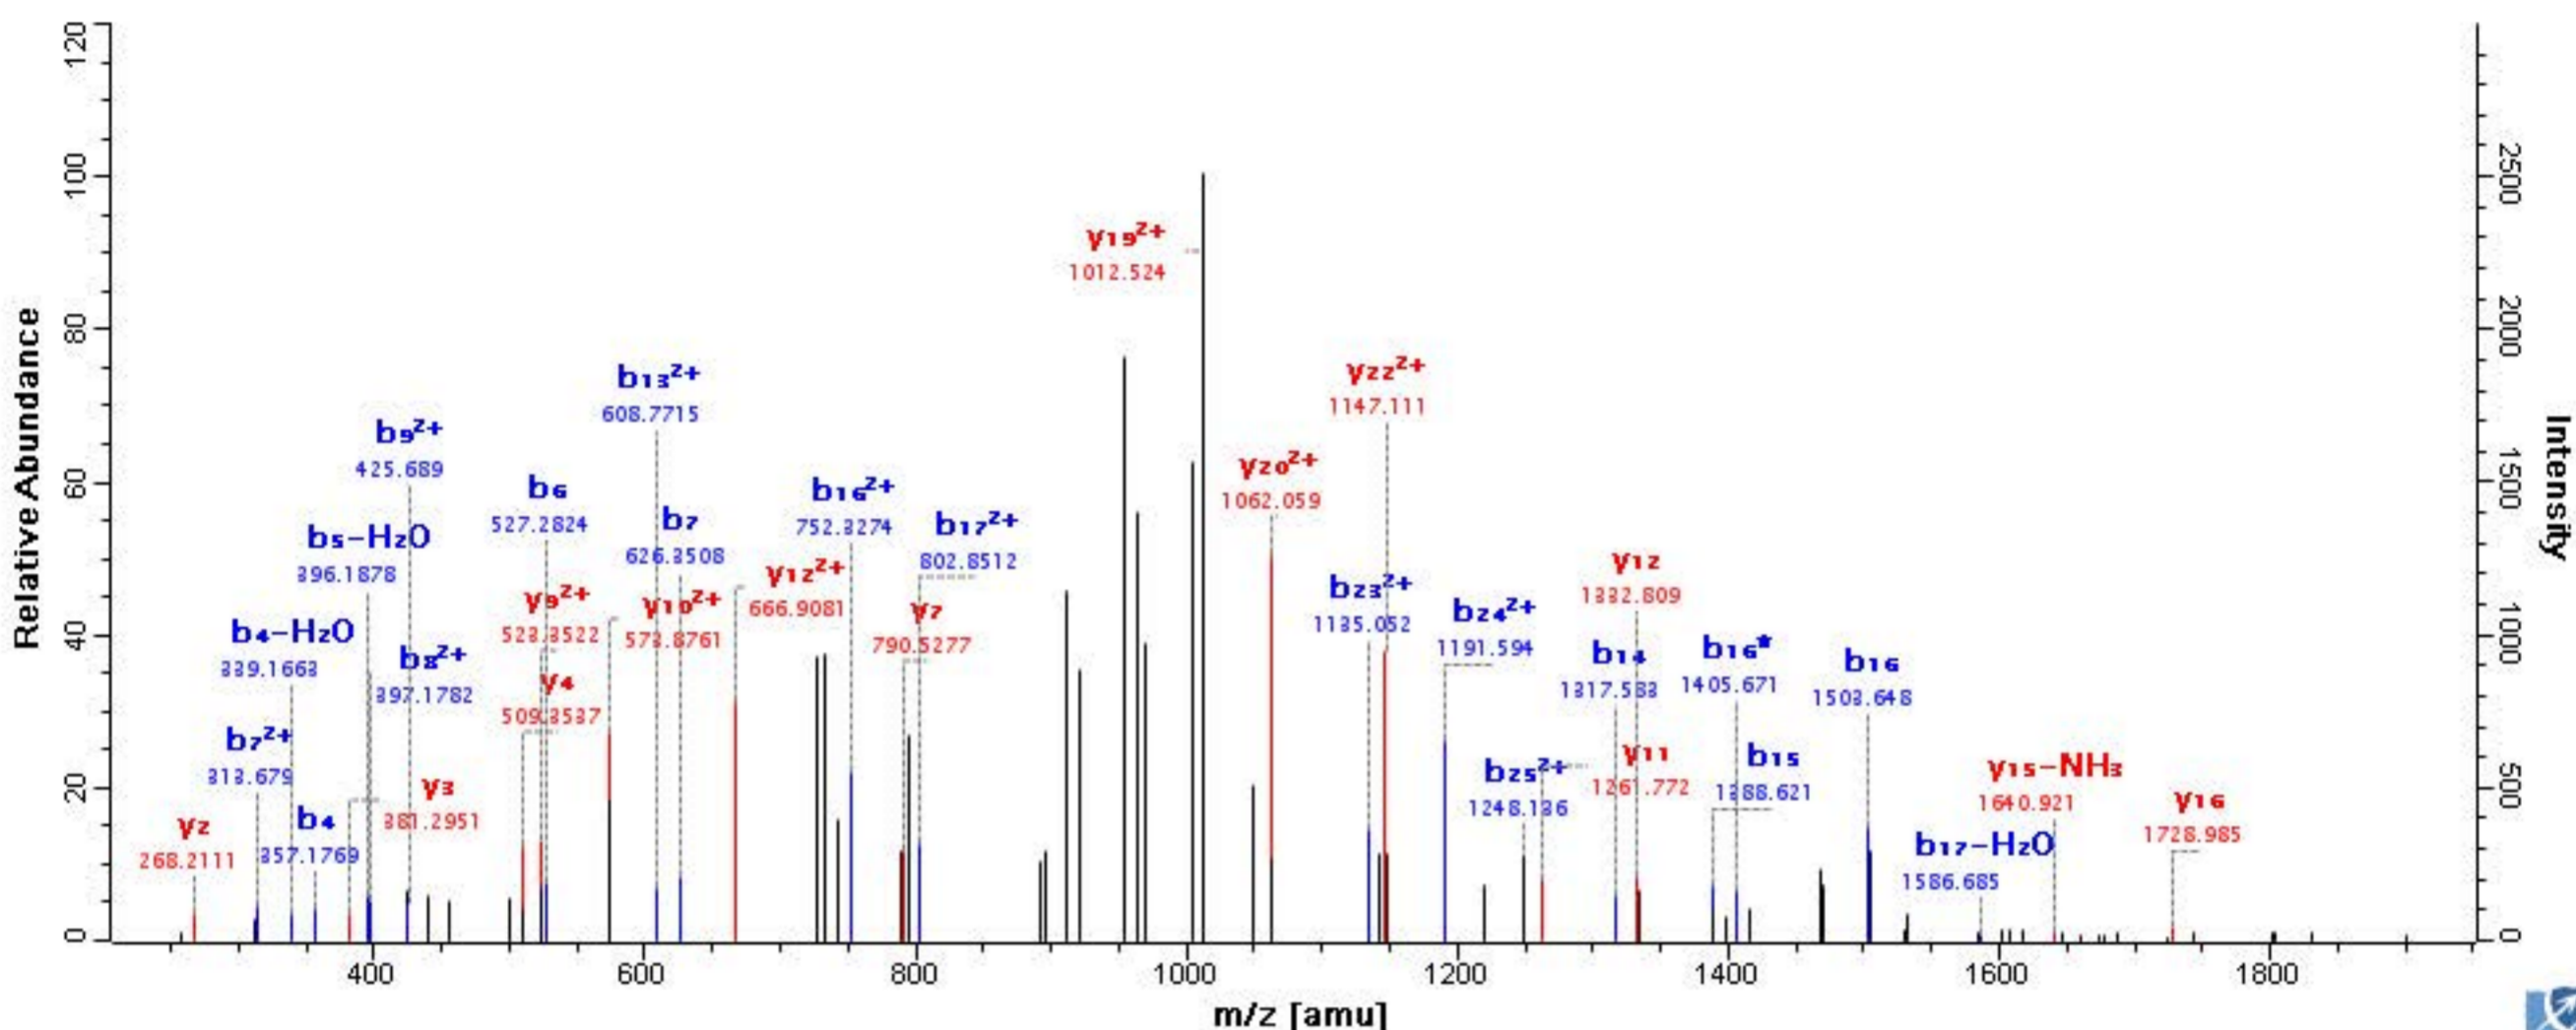

#### precursor information

|                   |                     |
|-------------------|---------------------|
| Mass:             | 2640.36321          |
| m/z:              | System.Collections. |
| Charge:           | System.Collections. |
| Retentiontime:    | System.Collections. |
| Score:            | 119.6186            |
| Mass Error [ppm]: | -0.15986            |
| PEP:              | 1.0247E-11          |
| Precursor Type:   | MULTI               |

| b <sup>2+</sup> ion |          | b ion     |          | seq |   |    | y ion    |           | y <sup>2+</sup> ion |           |
|---------------------|----------|-----------|----------|-----|---|----|----------|-----------|---------------------|-----------|
| Δ dalton            | mass     | Δ dalton  | mass     |     |   |    | Δ dalton | mass      | Δ dalton            | mass      |
|                     | 58.02874 |           | 58.02874 | 1   | G | 25 |          |           |                     |           |
|                     | 171.1128 |           | 171.1128 | 2   | I | 24 | 2592.364 |           | 2592.364            |           |
|                     | 242.1499 |           | 242.1499 | 3   | A | 23 | 2479.28  |           | 2479.28             |           |
|                     | 357.1769 | -0.014477 | 357.1769 | 4   | D | 22 | 2408.242 |           | 2408.242            |           |
|                     | 414.1983 |           | 414.1983 | 5   | G | 21 | 2293.216 |           | 1147.111            | -0.128488 |
|                     | 527.2824 | -0.040628 | 527.2824 | 6   | I | 20 | 2236.194 |           | 2236.194            |           |
| -0.275536           | 313.679  | +0.084805 | 626.3508 | 7   | V | 19 | 2123.11  |           | 1062.059            | +0.248494 |
| +0.097843           | 397.1782 |           | 793.3492 | 8   | S | 18 | 2024.042 |           | 1012.524            | +0.034166 |
| -0.441636           | 425.689  |           | 850.3706 | 9   | G | 17 | 1857.043 |           | 1857.043            |           |
|                     | 921.4077 |           | 921.4077 | 10  | A | 16 | 1800.022 |           | 1800.022            |           |
|                     | 992.4449 |           | 992.4449 | 11  | A | 15 | 1728.985 | -0.034325 | 1728.985            |           |
|                     | 1129.504 |           | 1129.504 | 12  | H | 14 | 1657.948 |           | 1657.948            |           |
| -0.303822           | 608.7715 |           | 1216.536 | 13  | S | 13 | 1520.889 |           | 1520.889            |           |
|                     | 1317.583 | -0.146216 | 1317.583 | 14  | T | 12 | 1433.857 |           | 1433.857            |           |
|                     | 1388.621 | +0.008199 | 1388.621 | 15  | A | 11 | 1332.809 | +0.087208 | 666.9081            | -0.005811 |
| -0.056589           | 752.3274 | +0.146295 | 1503.648 | 16  | D | 10 | 1261.772 | -0.148994 | 1261.772            |           |
| +0.428605           | 802.8512 |           | 1604.695 | 17  | T | 9  | 1146.745 |           | 573.8761            | -0.090115 |
|                     | 1703.764 |           | 1703.764 | 18  | V | 8  | 1045.697 |           | 523.3522            | +0.001351 |
|                     | 1859.865 |           | 1859.865 | 19  | R | 7  | 946.6288 |           | 946.6288            |           |
|                     | 1956.917 |           | 1956.917 | 20  | P | 6  | 790.5277 | +0.050902 | 790.5277            |           |
|                     | 2027.955 |           | 2027.955 | 21  | A | 5  | 693.4749 |           | 693.4749            |           |
|                     | 2141.039 |           | 2141.039 | 22  | I | 4  | 622.4378 |           | 622.4378            |           |
| +0.094221           | 1135.052 |           | 2269.097 | 23  | Q | 3  | 509.3537 | -0.137156 | 509.3537            |           |
| +0.010685           | 1191.594 |           | 2382.181 | 24  | I | 2  | 381.2951 | -0.039485 | 381.2951            |           |
| -0.10996            | 1248.136 |           | 2495.265 | 25  | I | 1  | 268.2111 | +0.067253 | 268.2111            |           |
|                     |          |           |          | 26  | K | 0  | 155.127  |           | 155.127             |           |

#### general information

|                       |             |
|-----------------------|-------------|
| Annotation:           | 18 of 26    |
| AminoAcids Coverage:  | 69 %        |
| Intensity Coverage:   | 34 %        |
| Protein Localisation: | 116 ... 141 |

Source: 201205213\_VR\_Bsu\_TripleSILACrep1\_pL2ESLS\_F05  
 Scannumber: 1752  
 Protein: BSU02920; yceF  
 Peptide Score: 104.43  
 Method: ITMS; CID; 3

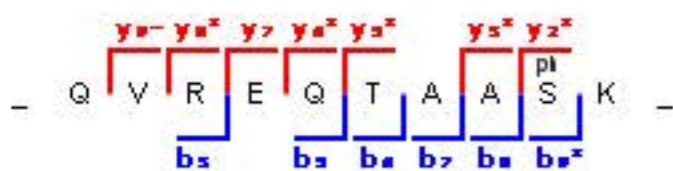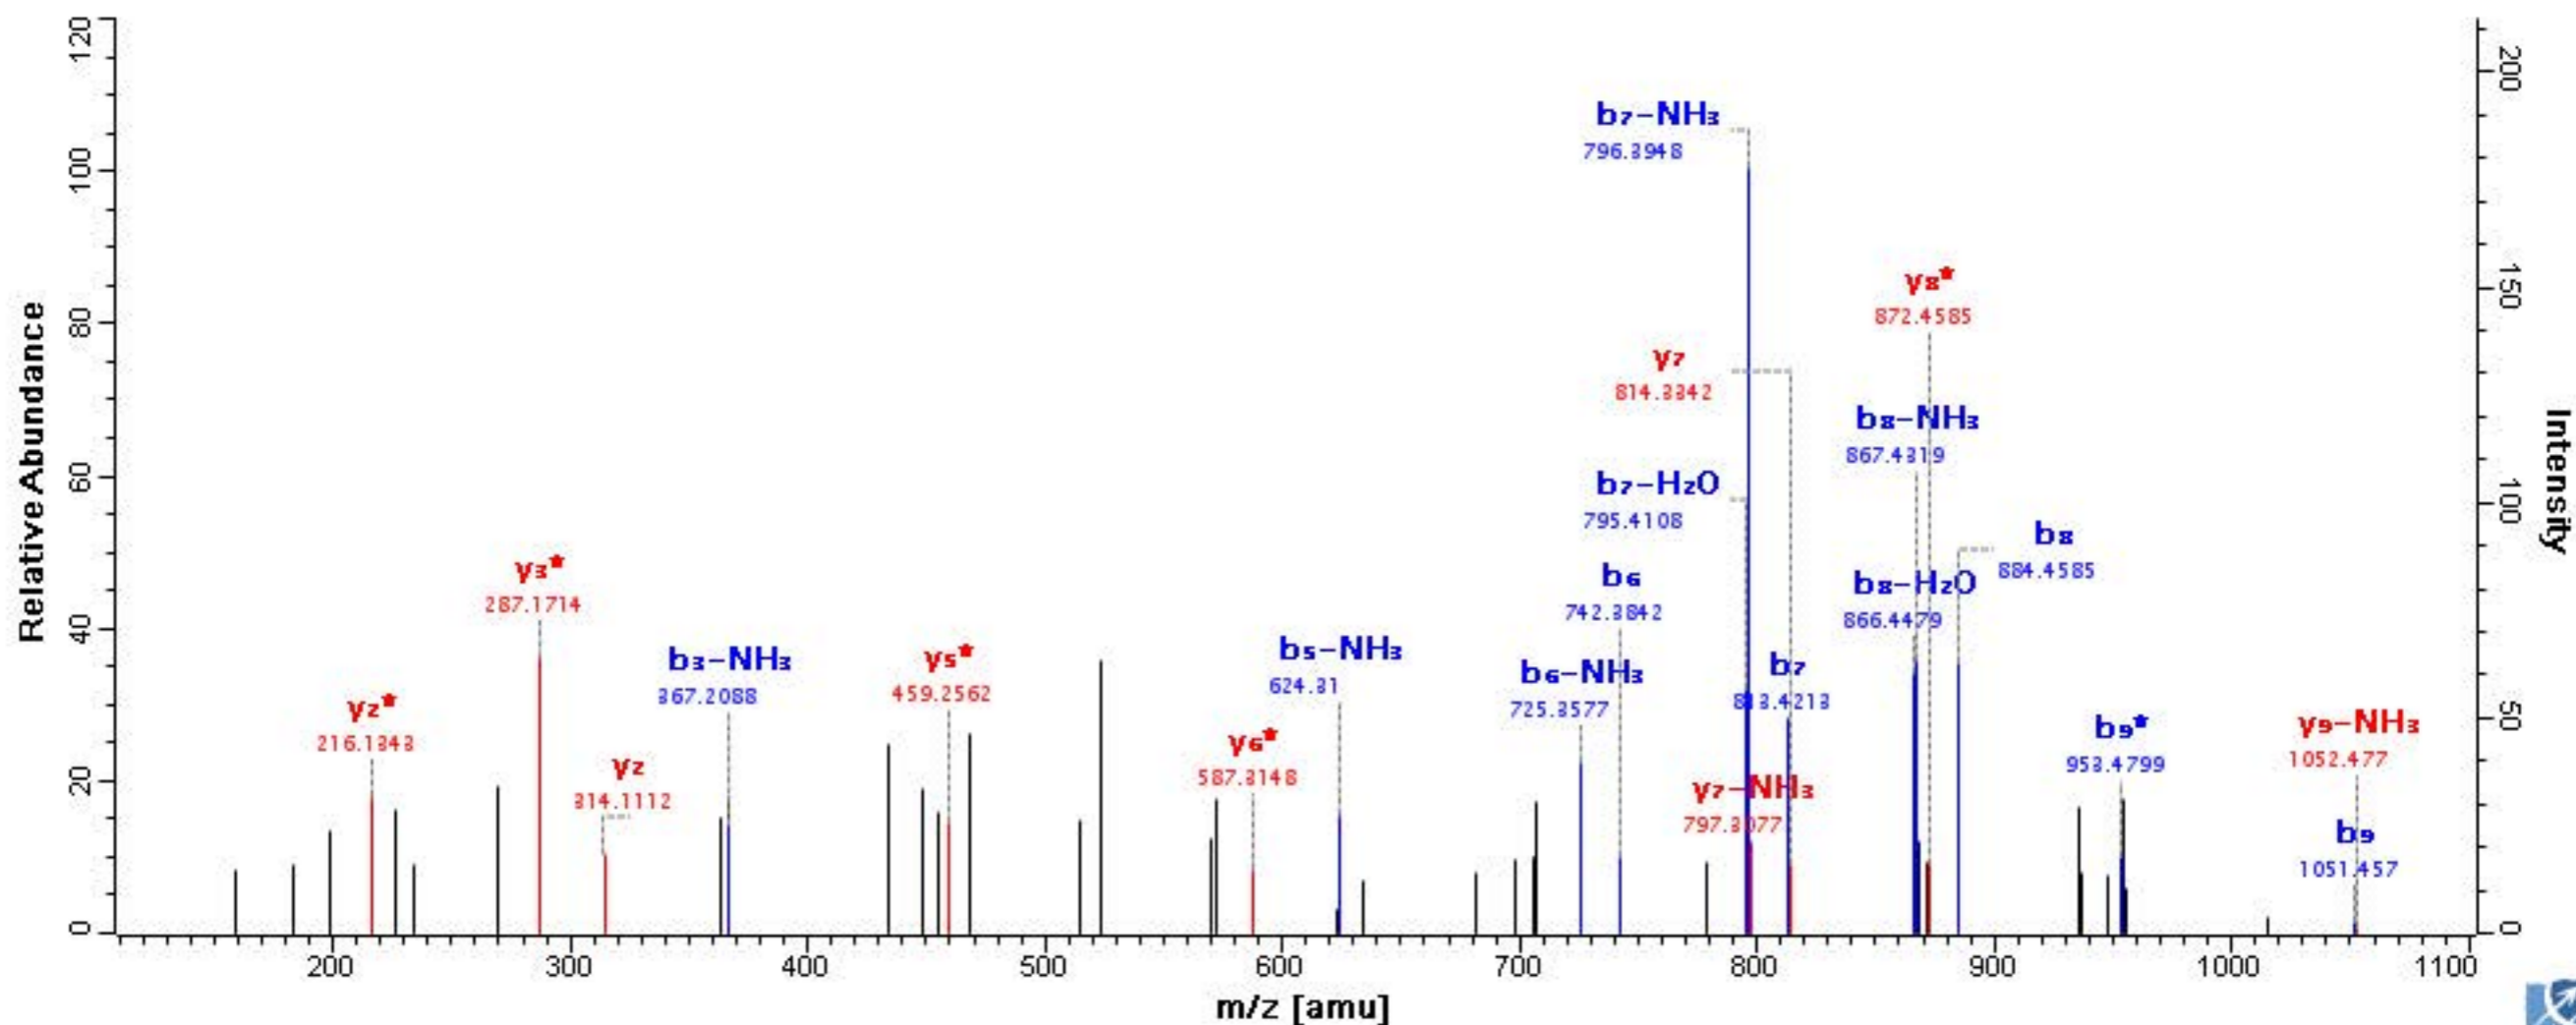

#### precursor information

|                   |                     |
|-------------------|---------------------|
| Mass:             | 1196.55519          |
| m/z:              | System.Collections. |
| Charge:           | System.Collections. |
| Retentiontime:    | System.Collections. |
| Score:            | 104.434             |
| Mass Error [ppm]: | 0.10416             |
| PEP:              | 0.0022241           |
| Precursor Type:   | MULTI               |

#### general information

|                       |             |
|-----------------------|-------------|
| Annotation:           | 8 of 10     |
| AminoAcids Coverage:  | 80 %        |
| Intensity Coverage:   | 51 %        |
| Protein Localisation: | 246 ... 255 |

| b ion      |                |    |     |   |               | y ion      |  |
|------------|----------------|----|-----|---|---------------|------------|--|
| Δ dalton   | mass           |    | seq |   | Δ dalton      | mass       |  |
|            | 129.065853978  | 1  | Q   | 9 |               |            |  |
|            | 228.134267894  | 2  | V   | 8 | 1069.50376459 |            |  |
|            | 384.235378922  | 3  | R   | 7 | 970.435350674 |            |  |
|            | 513.277972018  | 4  | E   | 6 | 814.334239646 | +0.2722667 |  |
|            | 641.33654953   | 5  | Q   | 5 | 685.29164655  |            |  |
| +0.1495244 | 742.384228004  | 6  | T   | 4 | 557.233069039 |            |  |
| +0.1169273 | 813.421341792  | 7  | A   | 3 | 456.185390564 |            |  |
| +0.0591836 | 884.45845558   | 8  | A   | 2 | 385.148276777 |            |  |
| +0.3084444 | 1051.456814398 | 9  | S   | 1 | 314.111162989 | +0.1680729 |  |
|            |                | 10 | K   | 0 | 147.112804171 |            |  |

Source: 201205213\_VR\_Bsu\_TripleSILACrep1\_pL2ESLS\_F05  
 Scannumber: 4620  
 Protein: BSU23740; yqjU  
 Peptide Score: 90.83  
 Method: ITMS; CID; 3

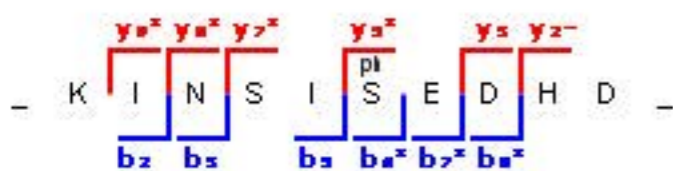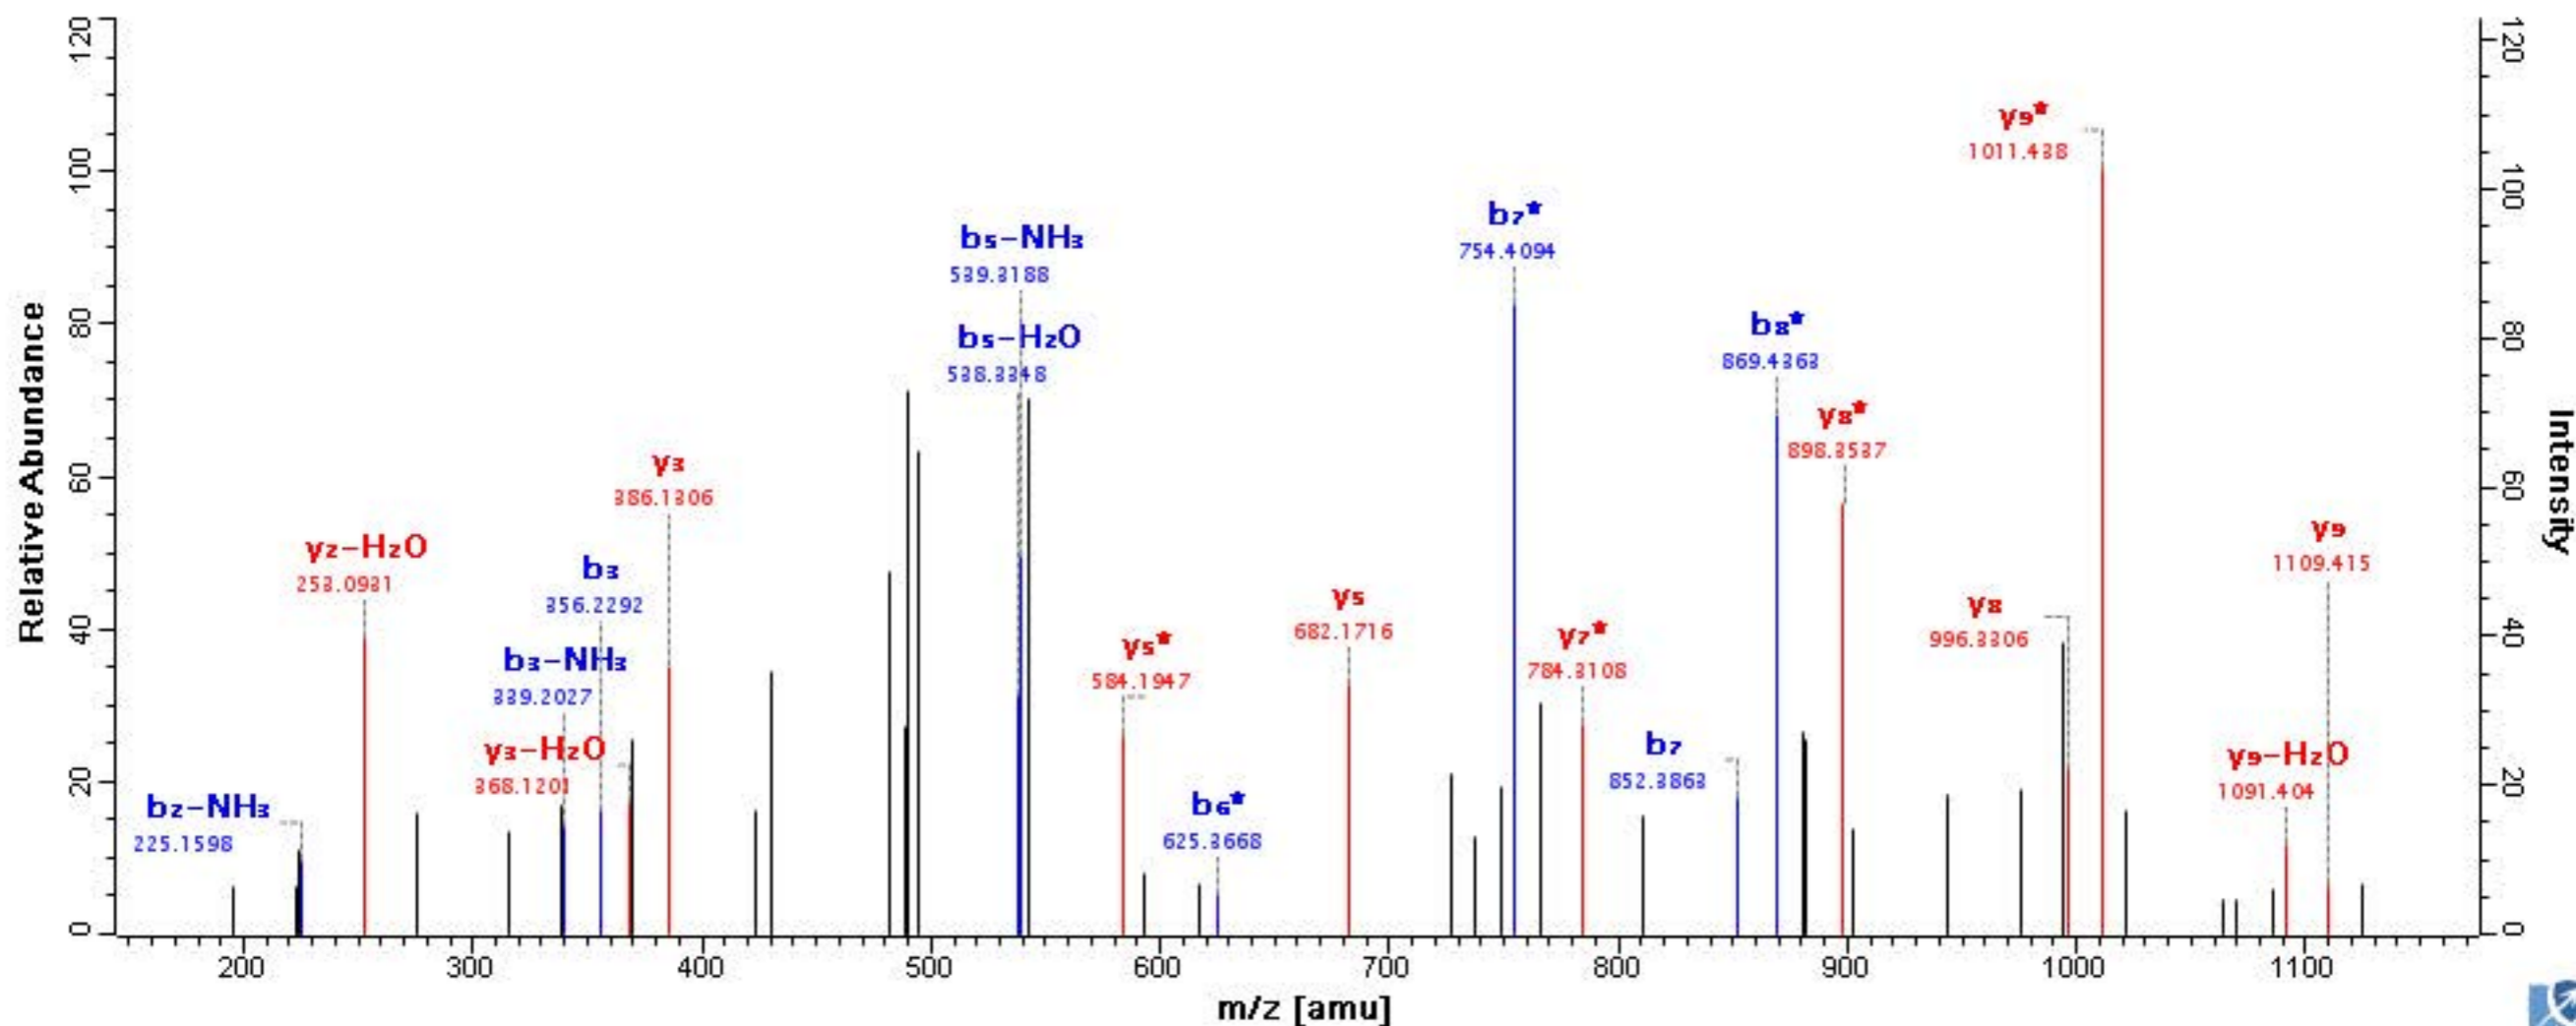

**precursor information**

|                   |                     |
|-------------------|---------------------|
| Mass:             | 1236.50206          |
| m/z:              | System.Collections. |
| Charge:           | System.Collections. |
| Retentiontime:    | System.Collections. |
| Score:            | 90.82698            |
| Mass Error [ppm]: | -0.24057            |
| PEP:              | 0.0057064           |
| Precursor Type:   | MULTI               |

**general information**

|                       |           |
|-----------------------|-----------|
| Annotation:           | 8 of 10   |
| AminoAcids Coverage:  | 80 %      |
| Intensity Coverage:   | 47 %      |
| Protein Localisation: | 43 ... 52 |

| b ion           |                |    |     |   |                 | y ion      |  |
|-----------------|----------------|----|-----|---|-----------------|------------|--|
| $\Delta$ dalton | mass           |    | seq |   | $\Delta$ dalton | mass       |  |
|                 | 129.102239484  | 1  | K   | 9 |                 |            |  |
|                 | 242.186303465  | 2  | I   | 8 | 1109.414674812  | -0.1195088 |  |
| +0.1084766      | 356.229230912  | 3  | N   | 7 | 996.330610831   | +0.0090498 |  |
|                 | 443.261259322  | 4  | S   | 6 | 882.287683384   |            |  |
|                 | 556.345323302  | 5  | I   | 5 | 795.255654974   |            |  |
|                 | 723.34368212   | 6  | S   | 4 | 682.171590994   | +0.00889   |  |
| +0.0084391      | 852.386275217  | 7  | E   | 3 | 515.173232175   |            |  |
|                 | 967.413218249  | 8  | D   | 2 | 386.130639079   | -0.1172113 |  |
|                 | 1104.472130111 | 9  | H   | 1 | 271.103696047   |            |  |
|                 |                | 10 | D   | 0 | 134.044784185   |            |  |

Source: 201205213\_VR\_Bsu\_TripleSILACrep1\_pL2ESLS\_F05  
 Scannumber: 5603  
 Protein: BSU01340; rpmD  
 Peptide Score: 124.98  
 Method: ITMS; CID; 3

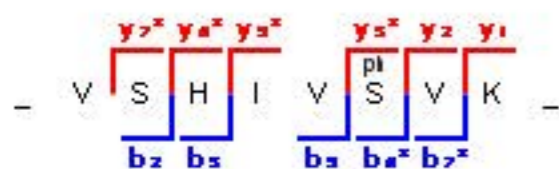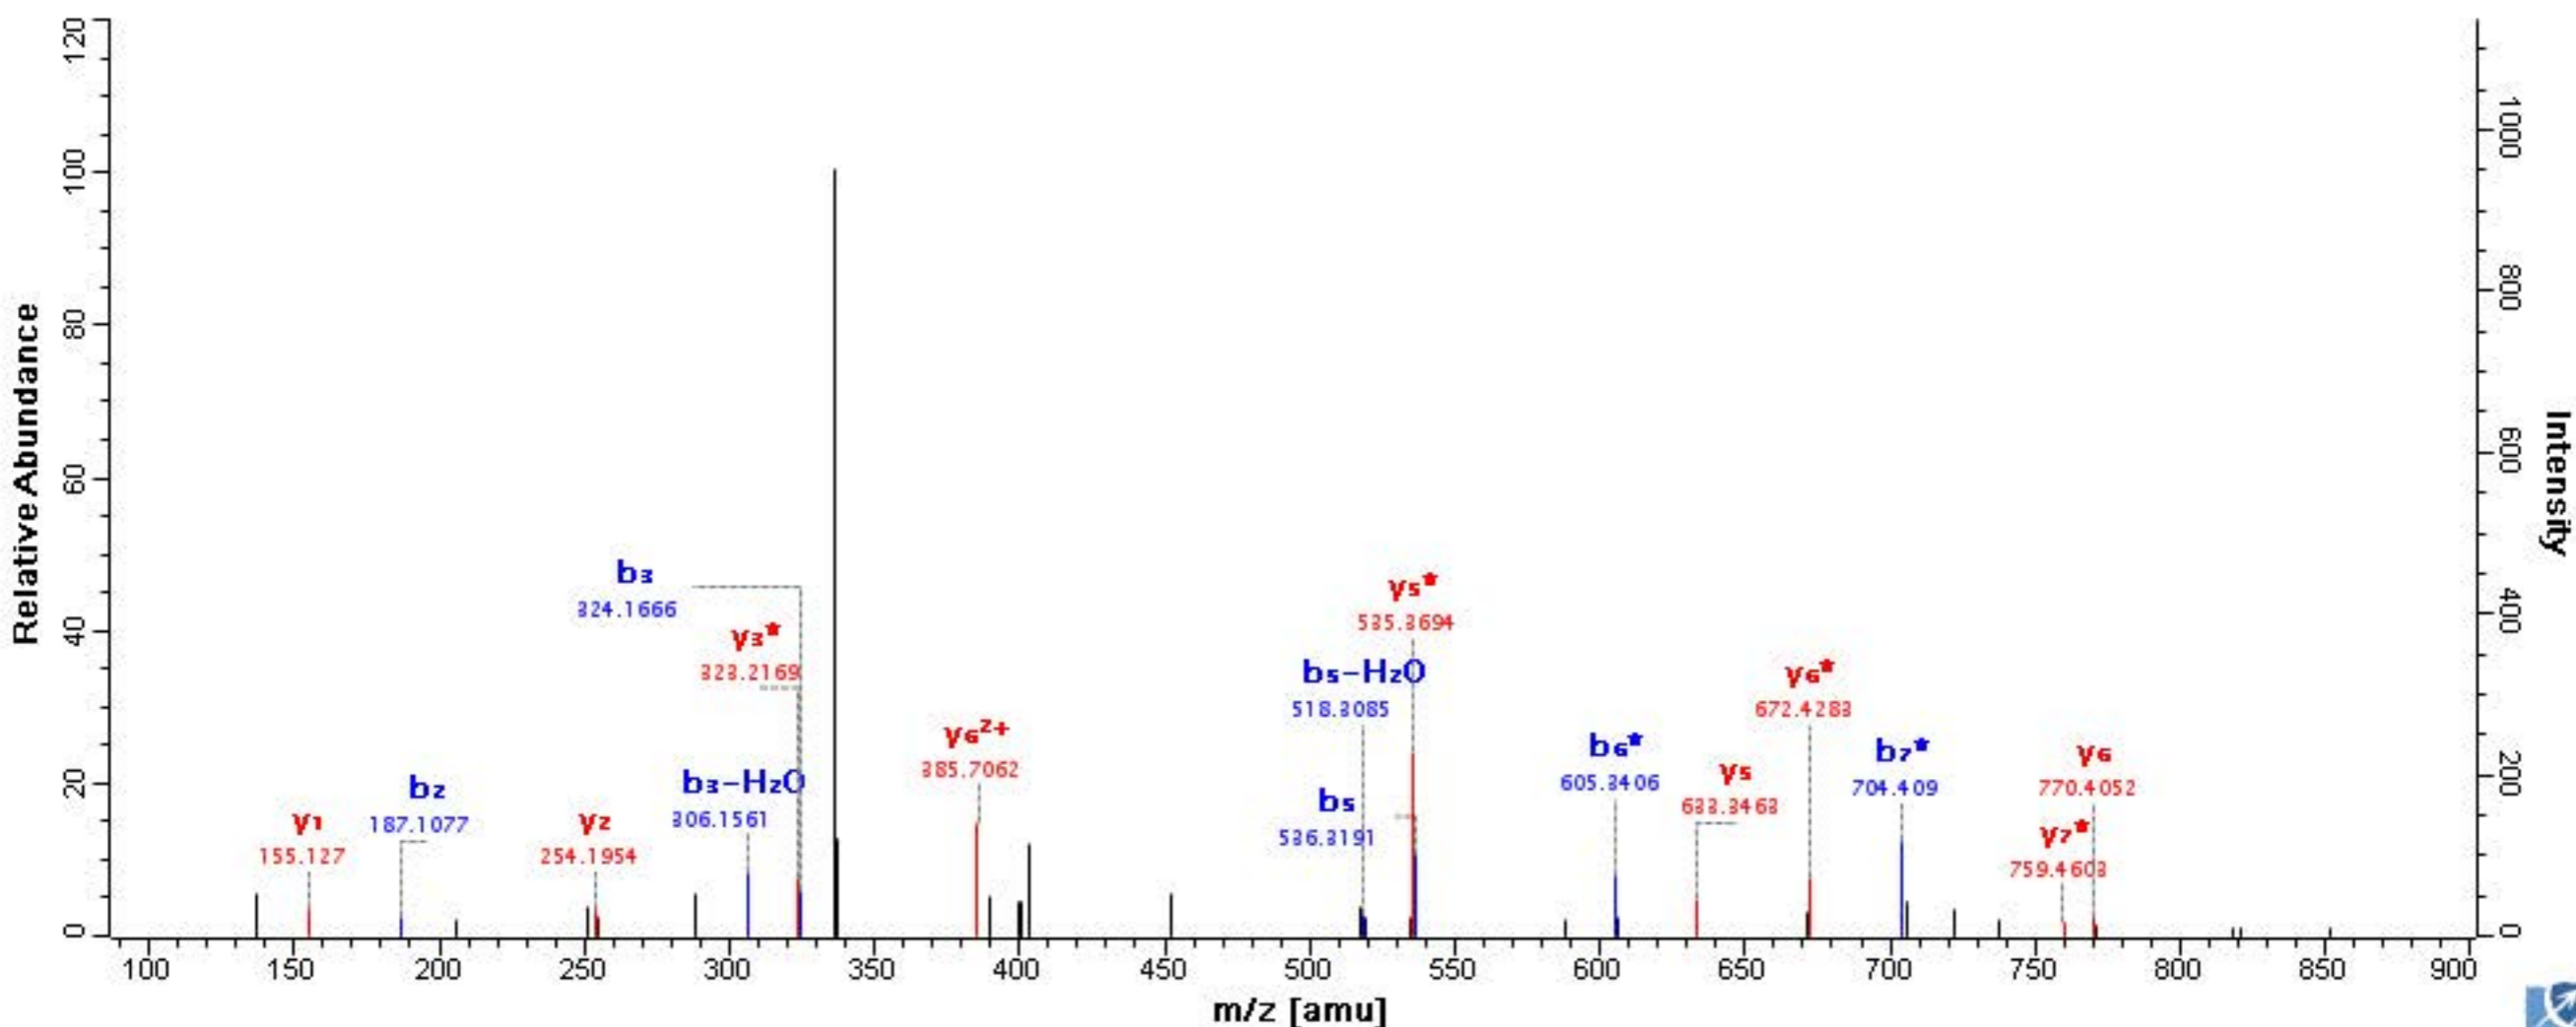

**precursor information**

|                       |                     |
|-----------------------|---------------------|
| Mass:                 | 947.4841            |
| m/z:                  | System.Collections. |
| Charge:               | System.Collections. |
| Retentiontime:        | System.Collections. |
| Score:                | 124.9833            |
| Mass Error [ppm]:     | -0.029755           |
| g PEP:                | 0.0053818           |
| Annotation:           | 7 of 8              |
| AminoAcids Coverage:  | 88 %                |
| Intensity Coverage:   | 38 %                |
| Protein Localisation: | 50 ... 57           |

| b ion      |              |   |     |   | y ion        |            | y <sup>2+</sup> ion |            |
|------------|--------------|---|-----|---|--------------|------------|---------------------|------------|
| Δ dalton   | mass         |   | seq |   | Δ dalton     | mass       | Δ dalton            | mass       |
|            | 100.07569038 | 1 | V   | 7 |              |            |                     |            |
| +0.0826499 | 187.10771879 | 2 | S   | 6 | 857.43719389 |            | 857.43719389        |            |
| +0.0211745 | 324.16663066 | 3 | H   | 5 | 770.40516548 | -0.0764912 | 385.70622097        | -0.2235855 |
|            | 437.25069464 | 4 | I   | 4 | 633.34625361 | +0.1226185 | 633.34625361        |            |
| -0.0068527 | 536.31910855 | 5 | V   | 3 | 520.26218963 |            | 520.26218963        |            |
|            | 703.31746737 | 6 | S   | 2 | 421.19377572 |            | 421.19377572        |            |
|            | 802.38588129 | 7 | V   | 1 | 254.1954169  | +0.0843988 | 254.1954169         |            |
|            |              | 8 | K   | 0 | 155.12700298 | +0.1605642 | 155.12700298        |            |



Source: 201205213\_VR\_Bsu\_TripleSILACrep1\_pL2ESLS\_F05  
 Scannumber: 6351  
 Protein: BSU19370; citK; odhA  
 Peptide Score: 116.55  
 Method: ITMS; CID; 3

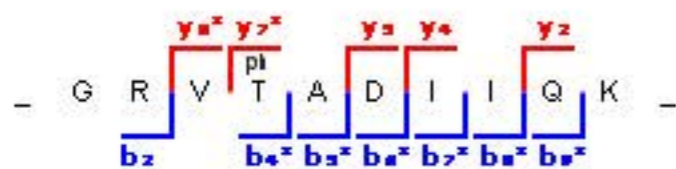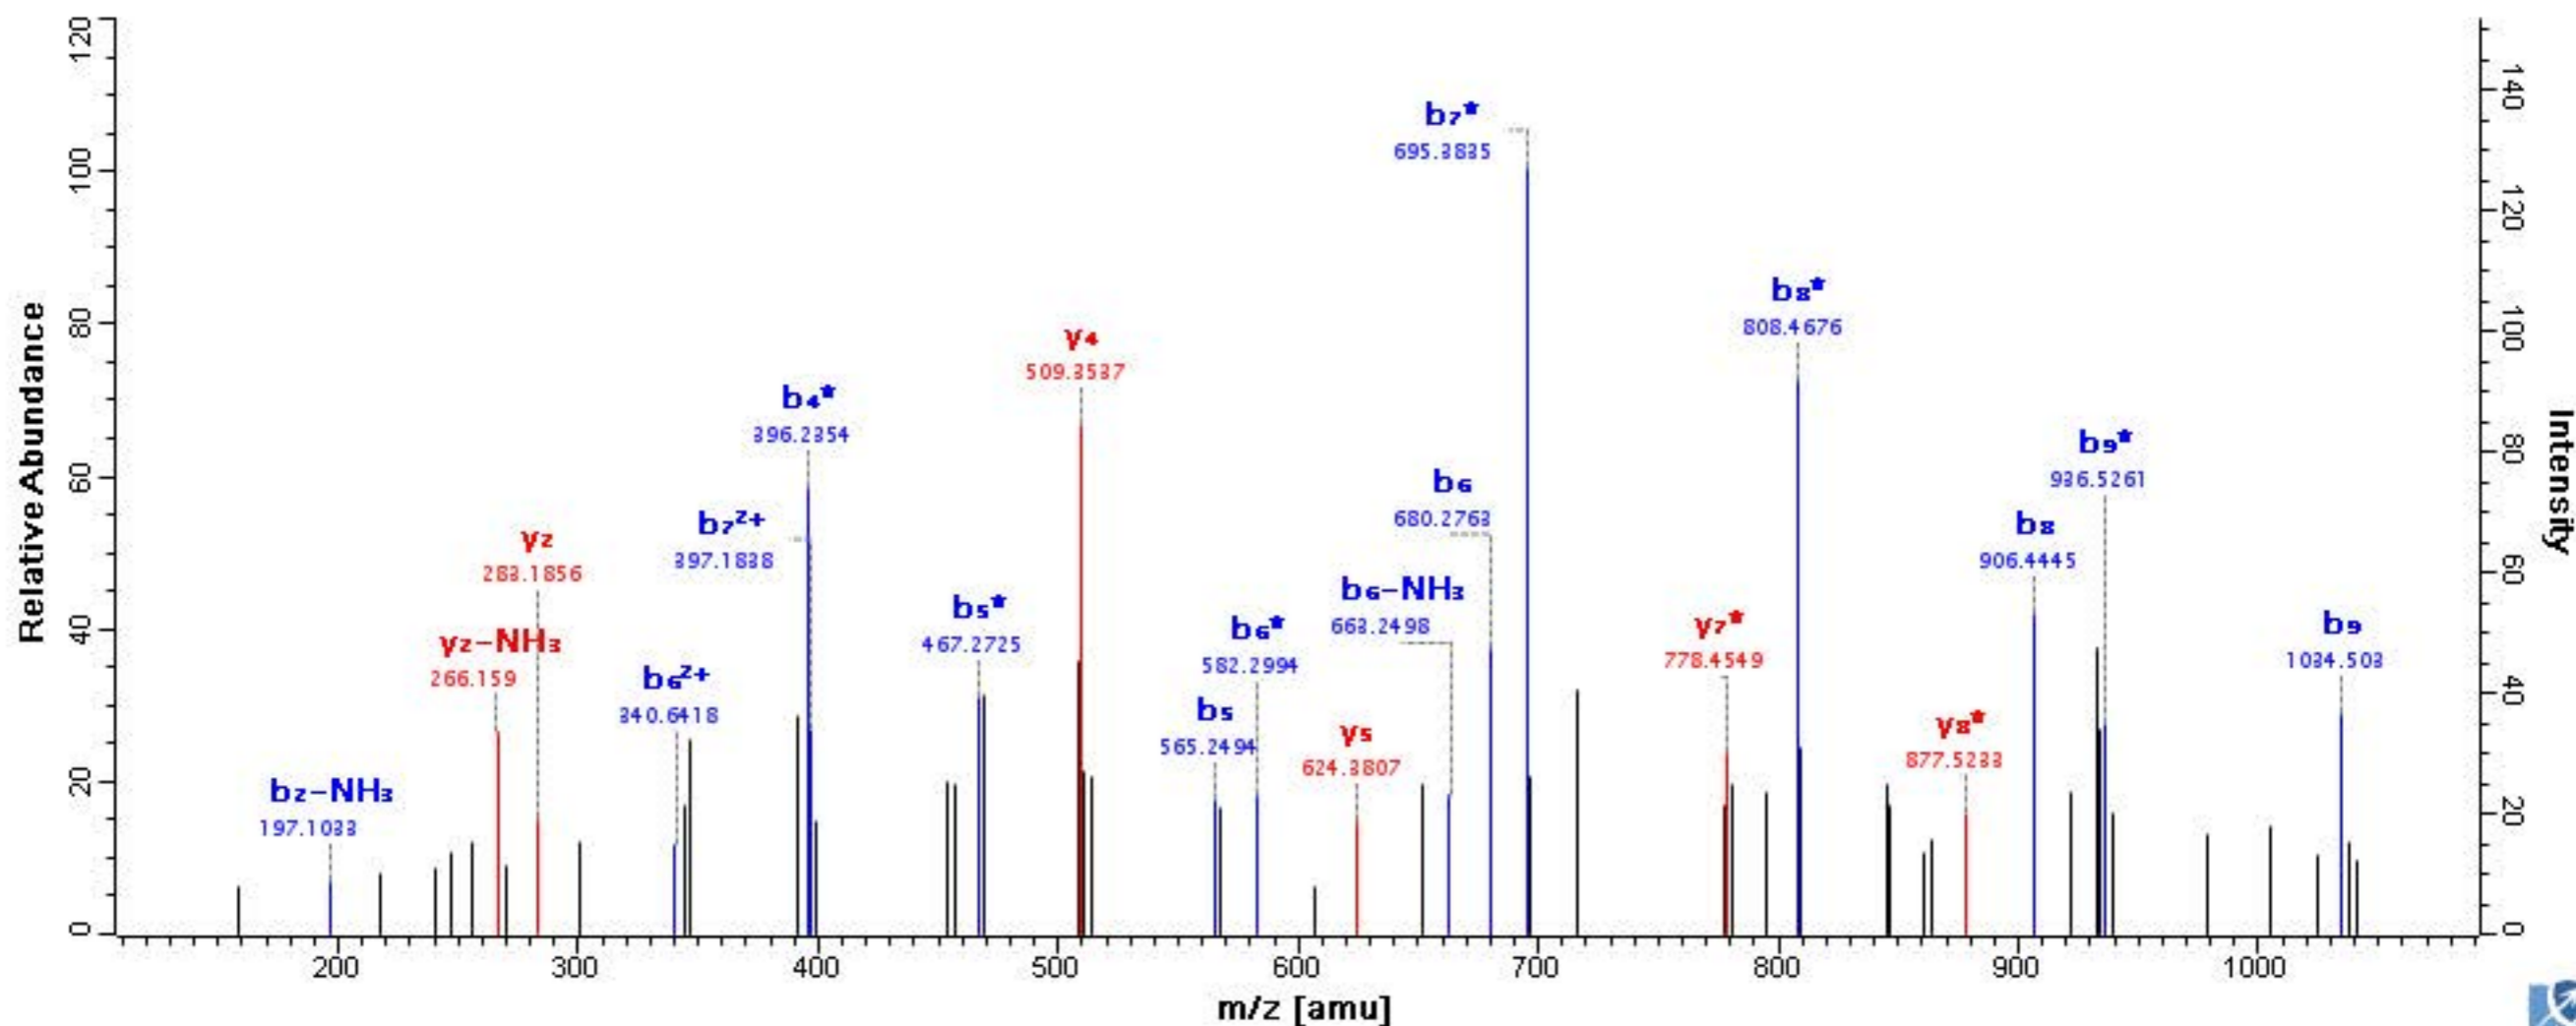

#### precursor information

|                   |                     |
|-------------------|---------------------|
| Mass:             | 1187.61562          |
| m/z:              | System.Collections. |
| Charge:           | System.Collections. |
| Retentiontime:    | System.Collections. |
| Score:            | 116.5463            |
| Mass Error [ppm]: | 0.11227             |
| PEP:              | 0.0011851           |
| Precursor Type:   | ISO                 |

#### general information

|                       |           |
|-----------------------|-----------|
| Annotation:           | 8 of 10   |
| AminoAcids Coverage:  | 80 %      |
| Intensity Coverage:   | 48 %      |
| Protein Localisation: | 65 ... 74 |

| b <sup>2+</sup> ion |              | b ion      |              |     | y ion    |      |              |            |
|---------------------|--------------|------------|--------------|-----|----------|------|--------------|------------|
| Δ dalton            | mass         | Δ dalton   | mass         | seq | Δ dalton | mass |              |            |
|                     | 58.02874019  |            | 58.02874019  | 1   | G        | 9    |              |            |
|                     | 214.12985122 |            | 214.12985122 | 2   | R        | 8    | 1131.6012991 |            |
|                     | 313.19826513 |            | 313.19826513 | 3   | V        | 7    | 975.50018807 |            |
|                     | 494.21227402 |            | 494.21227402 | 4   | T        | 6    | 876.43177416 |            |
|                     | 565.2493878  | +0.2215595 | 565.2493878  | 5   | A        | 5    | 695.41776528 |            |
| -0.3755683          | 340.64180365 | +0.122778  | 680.27633084 | 6   | D        | 4    | 624.38065149 | +0.2135258 |
| +0.0435814          | 397.18383564 |            | 793.36039482 | 7   | I        | 3    | 509.35370846 | +0.074209  |
|                     | 906.4444588  | +0.0283806 | 906.4444588  | 8   | I        | 2    | 396.26964448 |            |
|                     | 1034.5030363 | -0.0827482 | 1034.5030363 | 9   | Q        | 1    | 283.1855805  | +0.0900543 |
|                     |              |            |              | 10  | K        | 0    | 155.12700298 |            |

Source: 201205213\_VR\_Bsu\_TripleSILACrep1\_pL2ESLS\_F05  
 Scannumber: 6621  
 Protein: BSU33900; eno  
 Peptide Score: 105.98  
 Method: ITMS; CID; 3

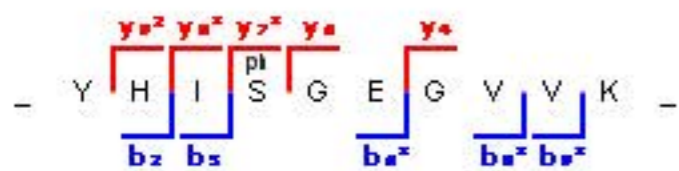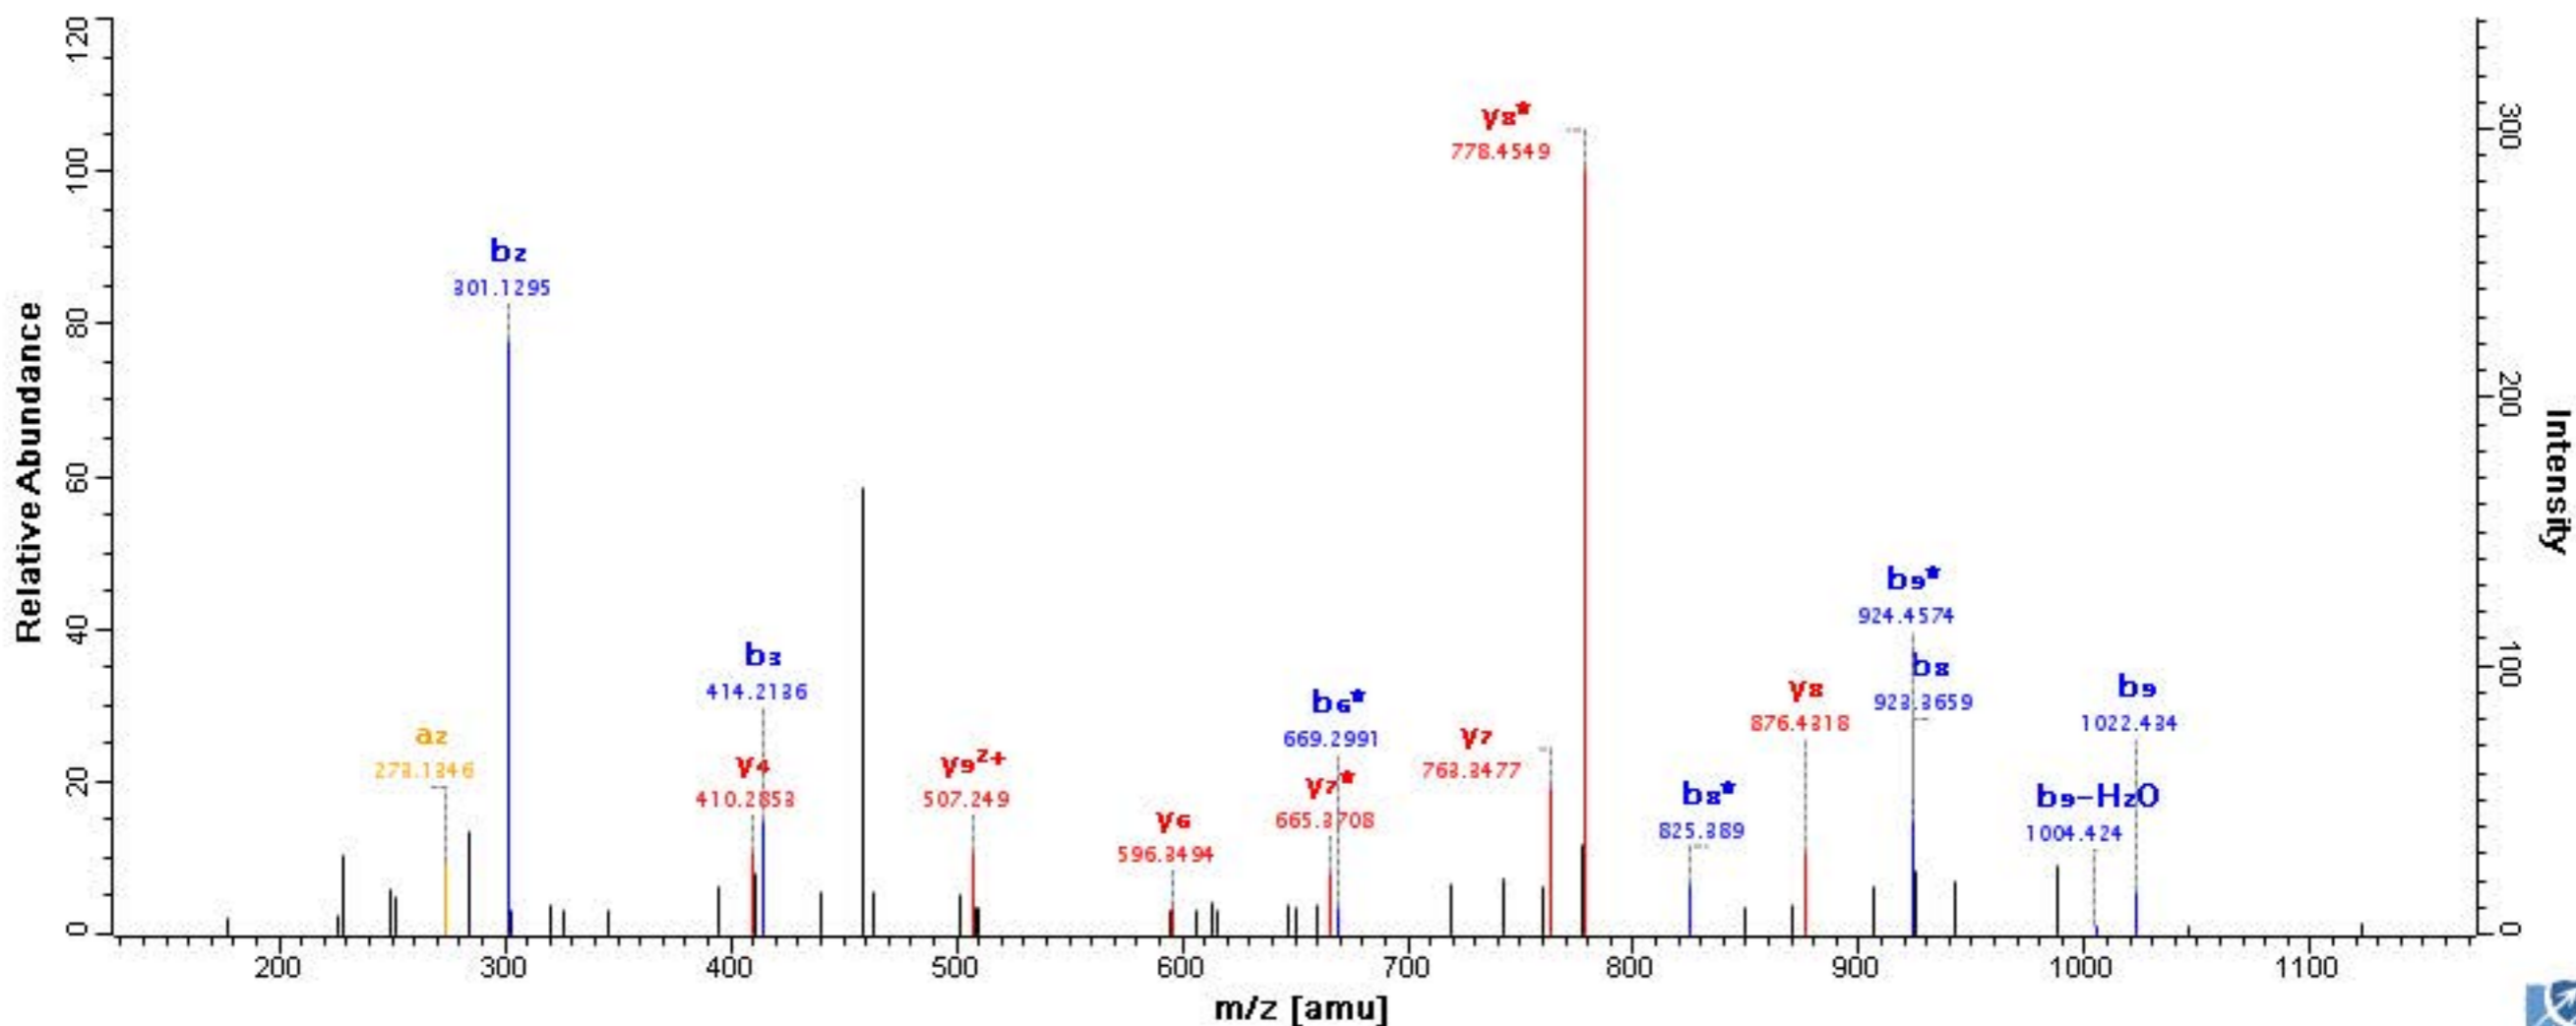

#### precursor information

|                   |                     |
|-------------------|---------------------|
| Mass:             | 1175.54677          |
| m/z:              | System.Collections. |
| Charge:           | System.Collections. |
| Retentiontime:    | System.Collections. |
| Score:            | 105.975             |
| Mass Error [ppm]: | 0.026832            |
| PEP:              | 0.0013694           |
| Precursor Type:   | ISO                 |

#### general information

|                       |             |
|-----------------------|-------------|
| Annotation:           | 8 of 10     |
| AminoAcids Coverage:  | 80 %        |
| Intensity Coverage:   | 56 %        |
| Protein Localisation: | 256 ... 265 |

| a ion    |          | b ion     |          |    |     |   | y ion    |           | y <sup>2+</sup> ion |           |
|----------|----------|-----------|----------|----|-----|---|----------|-----------|---------------------|-----------|
| Δ dalton | mass     | Δ dalton  | mass     |    | seq |   | Δ dalton | mass      | Δ dalton            | mass      |
|          | 136.0757 |           | 164.0706 | 1  | Y   | 9 |          |           |                     |           |
| +0.13853 | 273.1346 | +0.005859 | 301.1295 | 2  | H   | 8 | 1013.491 |           | 507.249             | +0.042462 |
|          | 386.2187 | -0.01186  | 414.2136 | 3  | I   | 7 | 876.4318 | -0.084423 | 876.4318            |           |
|          | 553.217  |           | 581.2119 | 4  | S   | 6 | 763.3477 | -0.079583 | 763.3477            |           |
|          | 610.2385 |           | 638.2334 | 5  | G   | 5 | 596.3494 | -0.177659 | 596.3494            |           |
|          | 739.2811 |           | 767.276  | 6  | E   | 4 | 539.3279 |           | 539.3279            |           |
|          | 796.3025 |           | 824.2975 | 7  | G   | 3 | 410.2853 | -0.15352  | 410.2853            |           |
|          | 895.371  | +0.214936 | 923.3659 | 8  | V   | 2 | 353.2638 |           | 353.2638            |           |
|          | 994.4394 | -0.075645 | 1022.434 | 9  | V   | 1 | 254.1954 |           | 254.1954            |           |
|          |          |           |          | 10 | K   | 0 | 155.127  |           | 155.127             |           |

Source: 201205213\_VR\_Bsu\_TripleSILACrep1\_pL2ESLS\_F05  
 Scannumber: 7588  
 Protein: BSU13900; ptsH  
 Peptide Score: 80.14  
 Method: ITMS; CID; 3

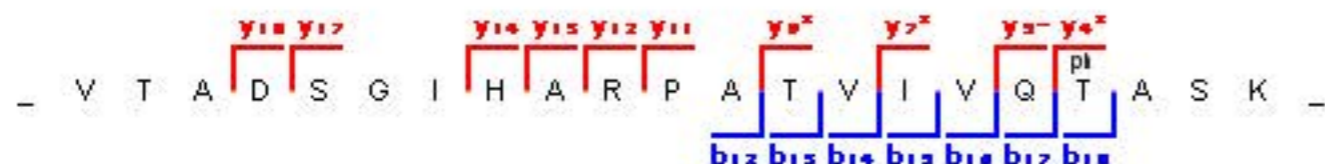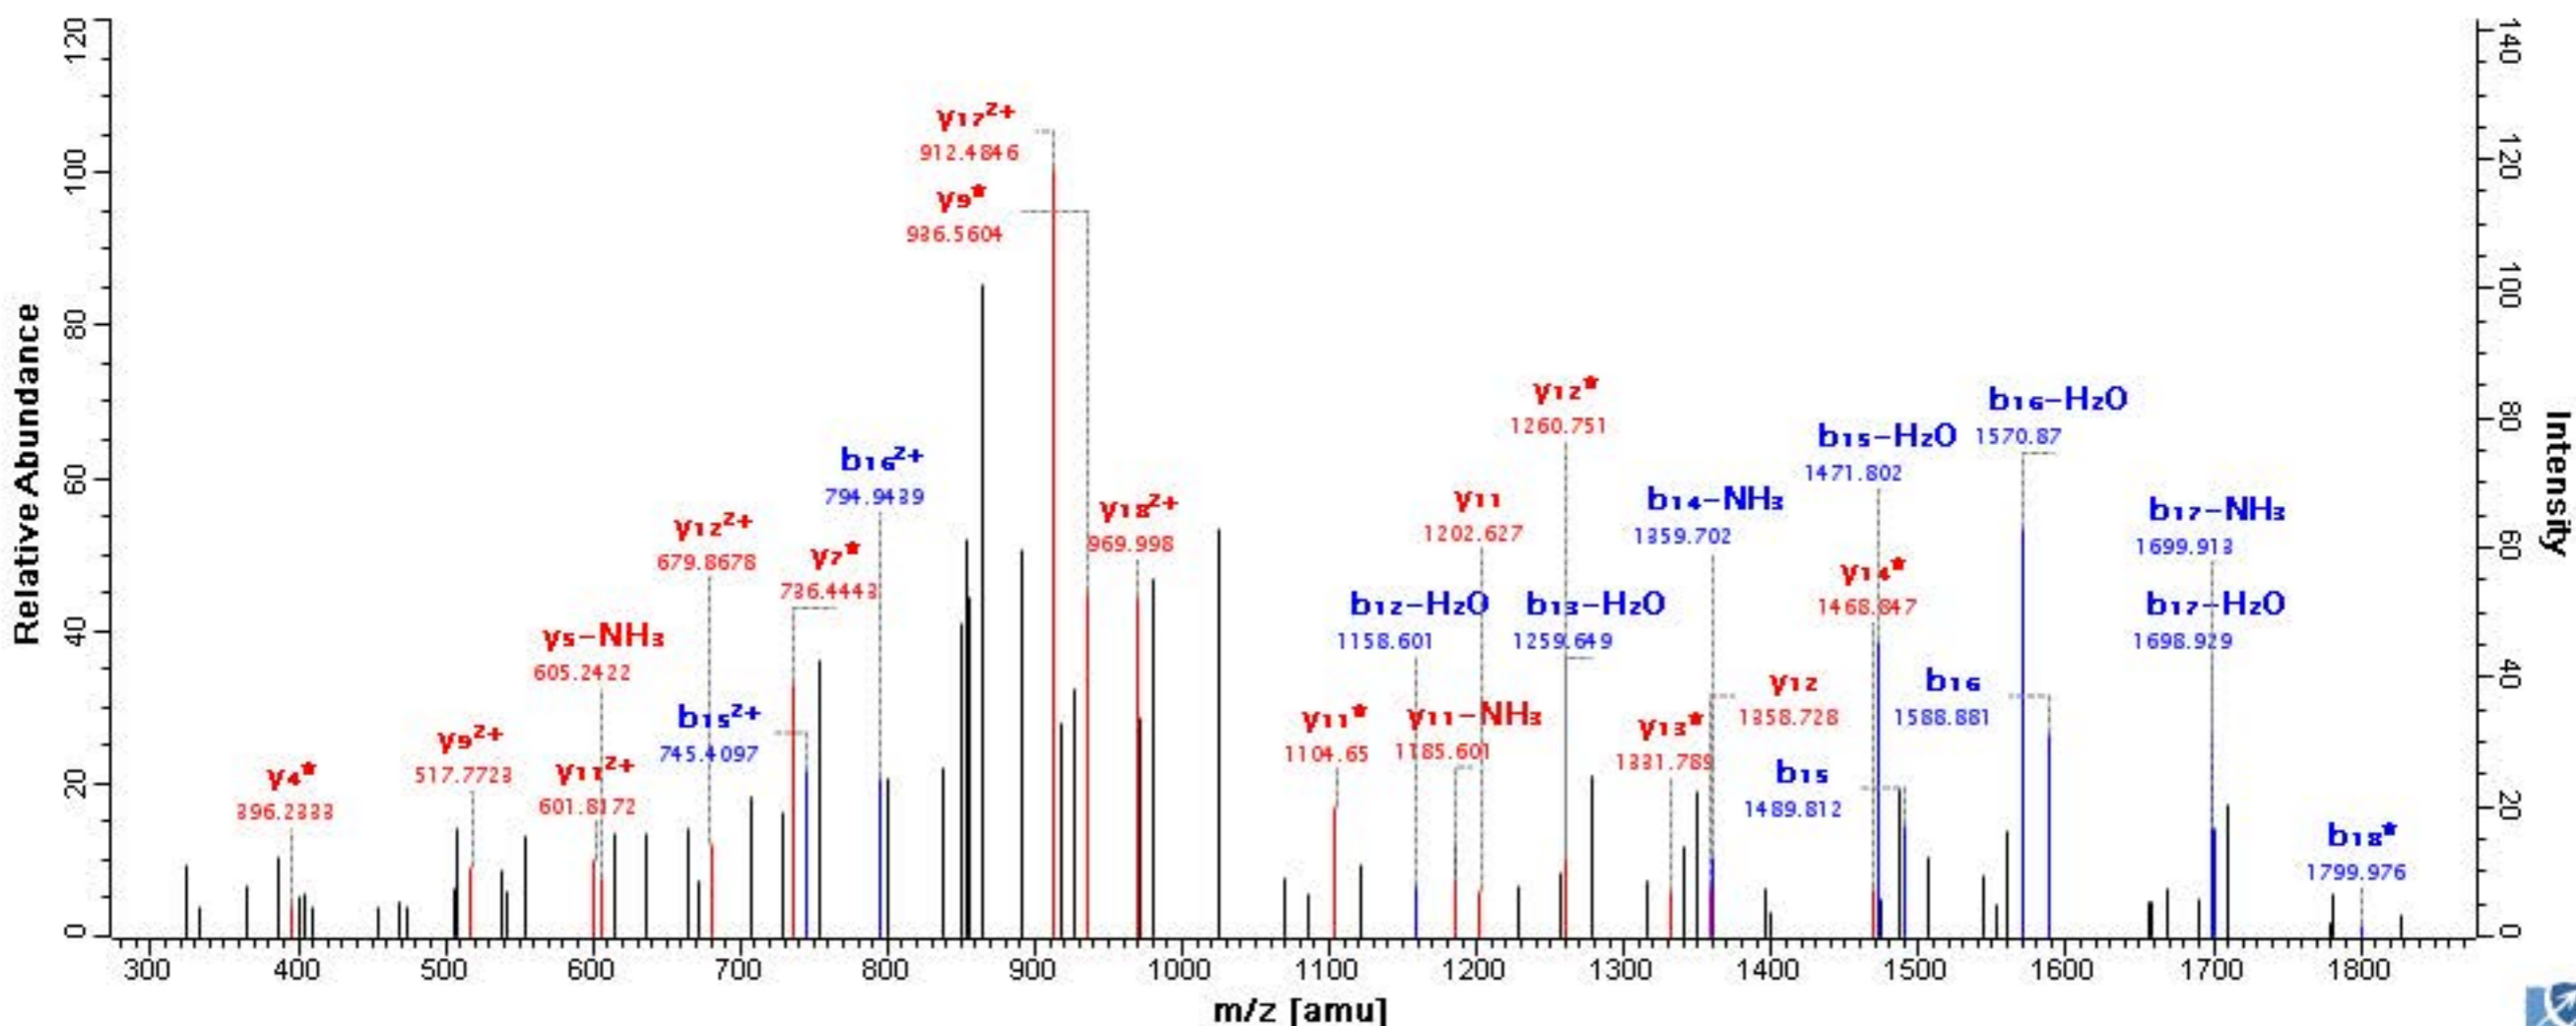

**precursor information**

|                   |                     |
|-------------------|---------------------|
| Mass:             | 2201.12036          |
| m/z:              | System.Collections. |
| Charge:           | System.Collections. |
| Retentiontime:    | System.Collections. |
| Score:            | 80.14178            |
| Mass Error [ppm]: | -0.083793           |
| PEP:              | 8.4341E-05          |
| Precursor Type:   | MULTI               |

| b <sup>2+</sup> ion |          | b ion     |          |    |     |    | γ ion    |           | γ <sup>2+</sup> ion |           |
|---------------------|----------|-----------|----------|----|-----|----|----------|-----------|---------------------|-----------|
| Δ dalton            | mass     | Δ dalton  | mass     |    | seq |    | Δ dalton | mass      | Δ dalton            | mass      |
|                     | 100.0757 |           | 100.0757 | 1  | V   | 20 |          |           |                     |           |
|                     | 201.1234 |           | 201.1234 | 2  | T   | 19 | 2111.074 |           | 2111.074            |           |
|                     | 272.1605 |           | 272.1605 | 3  | A   | 18 | 2010.026 |           | 2010.026            |           |
|                     | 387.1874 |           | 387.1874 | 4  | D   | 17 | 1938.989 |           | 969.998             | +0.395143 |
|                     | 474.2195 |           | 474.2195 | 5  | S   | 16 | 1823.962 |           | 912.4846            | +0.055587 |
|                     | 531.2409 |           | 531.2409 | 6  | G   | 15 | 1736.93  |           | 1736.93             |           |
|                     | 644.325  |           | 644.325  | 7  | I   | 14 | 1679.908 |           | 1679.908            |           |
|                     | 781.3839 |           | 781.3839 | 8  | H   | 13 | 1566.824 |           | 1566.824            |           |
|                     | 852.421  |           | 852.421  | 9  | A   | 12 | 1429.765 |           | 1429.765            |           |
|                     | 1008.522 |           | 1008.522 | 10 | R   | 11 | 1358.728 | -0.203876 | 679.8678            | +0.232802 |
|                     | 1105.575 |           | 1105.575 | 11 | P   | 10 | 1202.627 | -0.253766 | 601.8172            | -0.456022 |
|                     | 1176.612 |           | 1176.612 | 12 | A   | 9  | 1105.574 |           | 1105.574            |           |
|                     | 1277.66  |           | 1277.66  | 13 | T   | 8  | 1034.537 |           | 517.7723            | -0.244457 |
|                     | 1376.728 |           | 1376.728 | 14 | V   | 7  | 933.4896 |           | 933.4896            |           |
| +0.086074           | 745.4097 | -0.008564 | 1489.812 | 15 | I   | 6  | 834.4212 |           | 834.4212            |           |
| -0.168165           | 794.9439 | +0.242969 | 1588.881 | 16 | V   | 5  | 721.3371 |           | 721.3371            |           |
|                     | 1716.939 |           | 1716.939 | 17 | Q   | 4  | 622.2687 |           | 622.2687            |           |
|                     | 1897.953 |           | 1897.953 | 18 | T   | 3  | 494.2102 |           | 494.2102            |           |
|                     | 1968.99  |           | 1968.99  | 19 | A   | 2  | 313.1961 |           | 313.1961            |           |
|                     | 2056.022 |           | 2056.022 | 20 | S   | 1  | 242.159  |           | 242.159             |           |
|                     |          |           |          | 21 | K   | 0  | 155.127  |           | 155.127             |           |

**general information**

|                       |          |
|-----------------------|----------|
| Annotation:           | 13 of 21 |
| AminoAcids Coverag    | 62 %     |
| Intensity Coverage:   | 37 %     |
| Protein Localisation: | 8 ... 28 |

Source: 201205213\_VR\_Bsu\_TripleSILACrep1\_pL2ESLS\_F06  
 Scannumber: 10819  
 Protein: BSU00490; spoVG  
 Peptide Score: 156.92  
 Method: ITMS; CID; 3

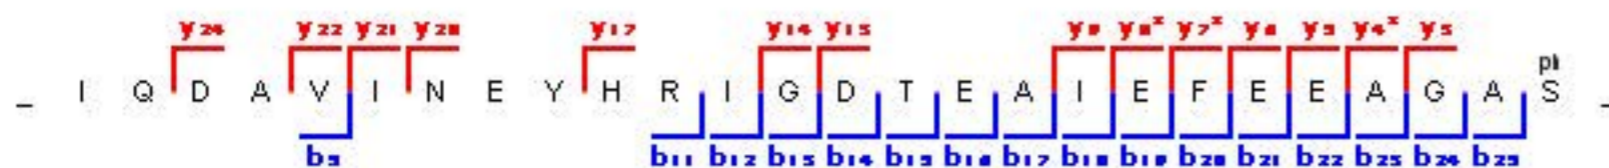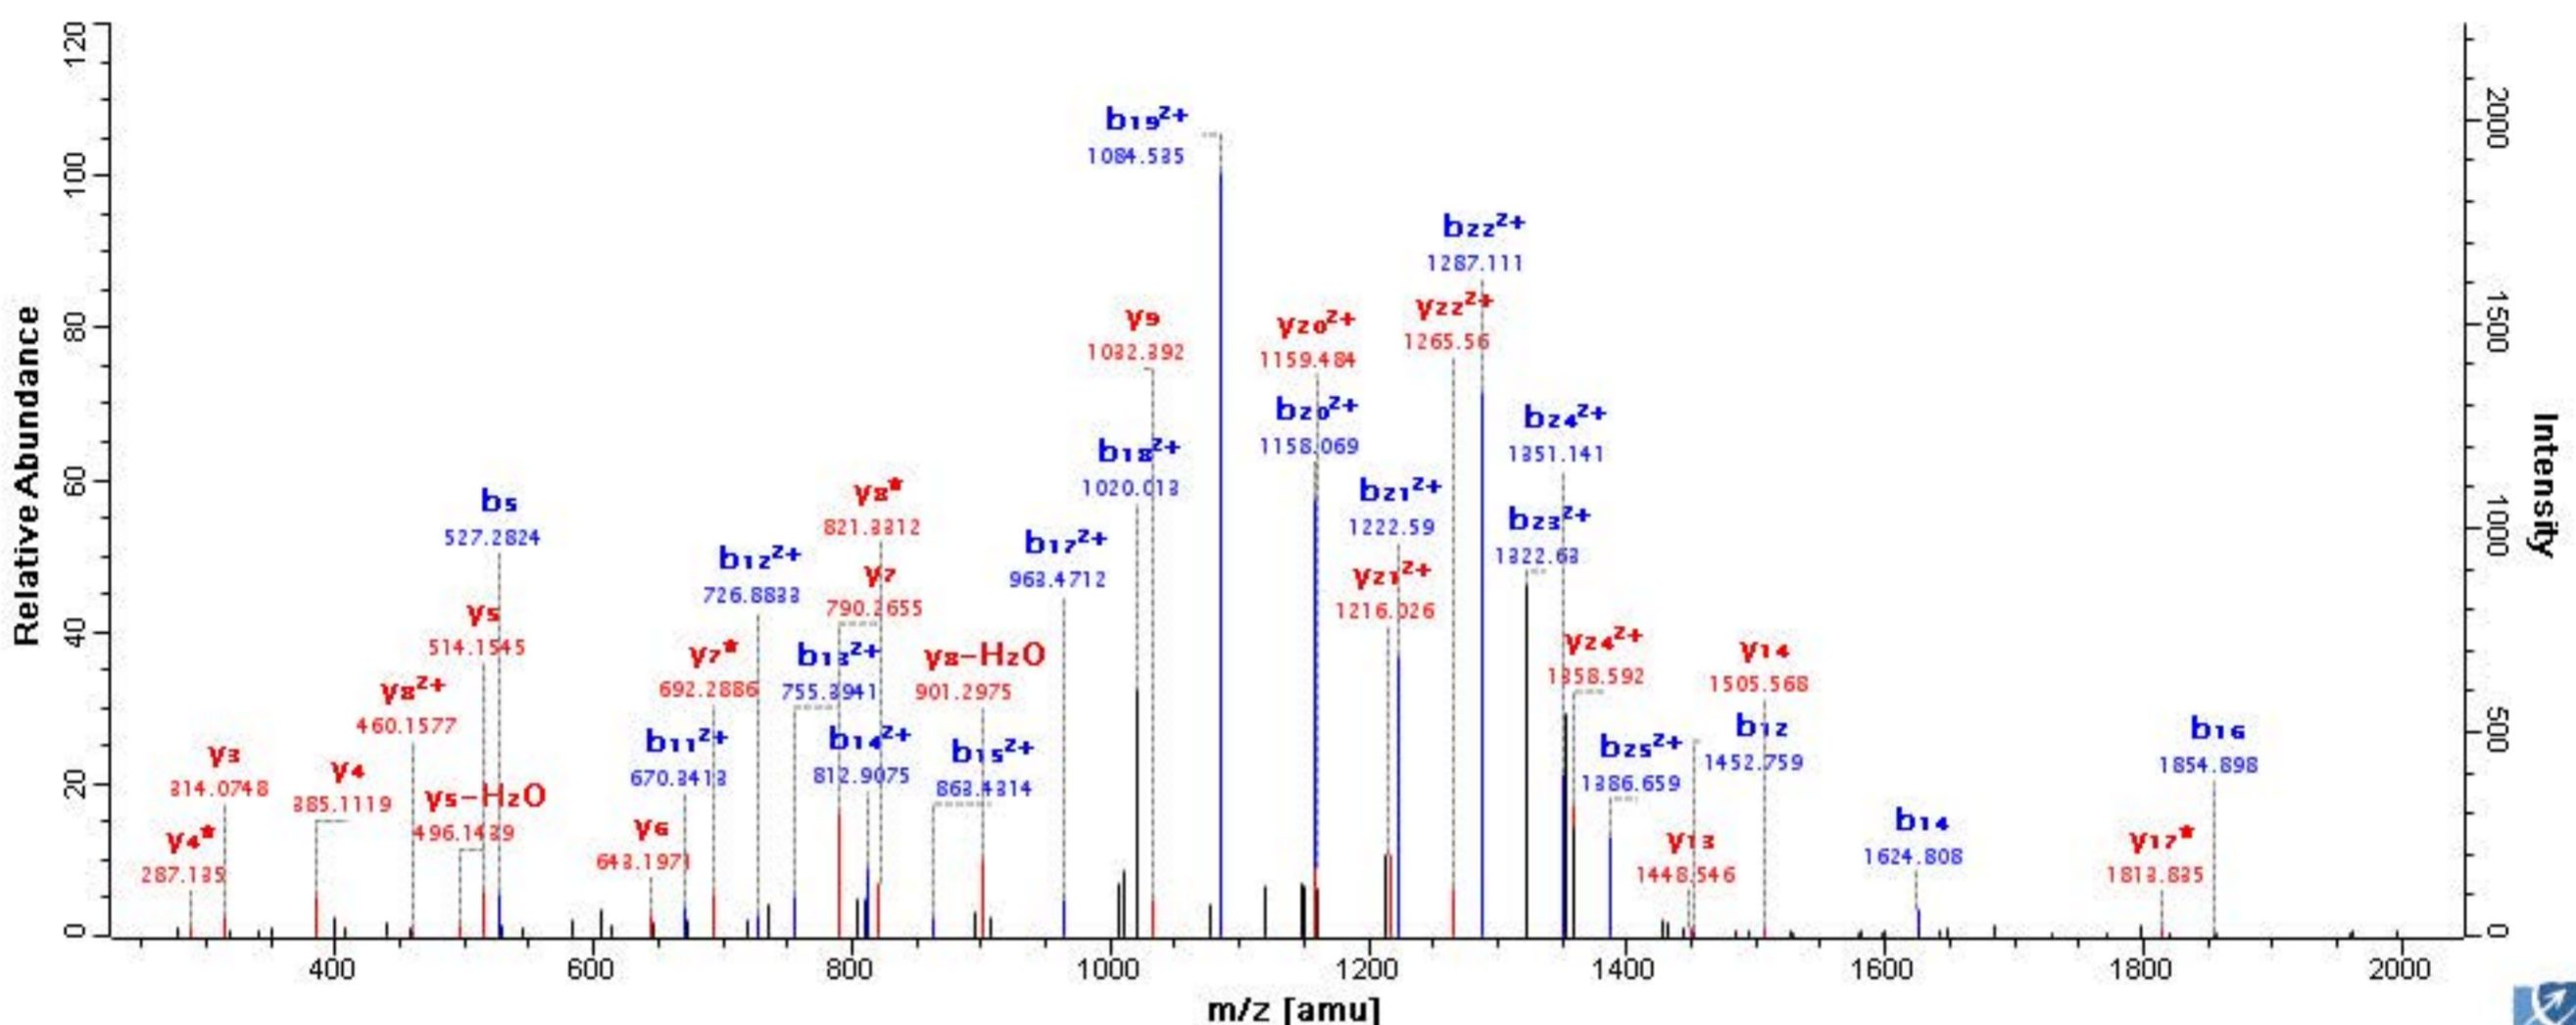

**precursor information**

|                   |                     |
|-------------------|---------------------|
| Mass:             | 2956.31426          |
| m/z:              | System.Collections. |
| Charge:           | System.Collections. |
| Retentiontime:    | System.Collections. |
| Score:            | 156.9196            |
| Mass Error [ppm]: | 0.5019              |
| PEP:              | 5.2043E-40          |
| Precursor Type:   | ISO                 |

| b <sup>2+</sup> ion |          | b ion     |          | seq |   |    | y ion    |           | y <sup>2+</sup> ion |           |
|---------------------|----------|-----------|----------|-----|---|----|----------|-----------|---------------------|-----------|
| Δ dalton            | mass     | Δ dalton  | mass     |     |   |    | Δ dalton | mass      | Δ dalton            | mass      |
|                     | 114.0913 |           | 114.0913 | 1   | I | 25 |          |           |                     |           |
|                     | 242.1499 |           | 242.1499 | 2   | Q | 24 | 2844.236 |           | 2844.236            |           |
|                     | 357.1769 |           | 357.1769 | 3   | D | 23 | 2716.177 |           | 1358.592            | -0.101865 |
|                     | 428.214  |           | 428.214  | 4   | A | 22 | 2601.15  |           | 2601.15             |           |
|                     | 527.2824 | -0.120646 | 527.2824 | 5   | V | 21 | 2530.113 |           | 1265.56             | +0.429797 |
|                     | 640.3665 |           | 640.3665 | 6   | I | 20 | 2431.045 |           | 1216.026            | +0.275039 |
|                     | 754.4094 |           | 754.4094 | 7   | N | 19 | 2317.961 |           | 1159.484            | -0.2956   |
|                     | 883.452  |           | 883.452  | 8   | E | 18 | 2203.918 |           | 2203.918            |           |
|                     | 1046.515 |           | 1046.515 | 9   | Y | 17 | 2074.875 |           | 2074.875            |           |
|                     | 1183.574 |           | 1183.574 | 10  | H | 16 | 1911.812 |           | 1911.812            |           |
| +0.040535           | 670.3413 |           | 1339.675 | 11  | R | 15 | 1774.753 |           | 1774.753            |           |
| +0.11978            | 726.8833 | -0.223378 | 1452.759 | 12  | I | 14 | 1618.652 |           | 1618.652            |           |
| +0.02659            | 755.3941 |           | 1509.781 | 13  | G | 13 | 1505.568 | +0.258353 | 1505.568            |           |
| +0.237728           | 812.9075 | +0.364812 | 1624.808 | 14  | D | 12 | 1448.546 | +0.47574  | 1448.546            |           |
| -0.056497           | 863.4314 |           | 1725.855 | 15  | T | 11 | 1333.52  |           | 1333.52             |           |
|                     | 1854.898 | -0.232784 | 1854.898 | 16  | E | 10 | 1232.472 |           | 1232.472            |           |
| +0.284142           | 963.4712 |           | 1925.935 | 17  | A | 9  | 1103.429 |           | 1103.429            |           |
| -0.106522           | 1020.013 |           | 2039.019 | 18  | I | 8  | 1032.392 | +0.081606 | 1032.392            |           |
| +0.30492            | 1084.535 |           | 2168.062 | 19  | E | 7  | 919.3081 |           | 460.1577            | +0.278233 |
| +0.199669           | 1158.069 |           | 2315.13  | 20  | F | 6  | 790.2655 | -0.106922 | 790.2655            |           |
| +0.278714           | 1222.59  |           | 2444.173 | 21  | E | 5  | 643.1971 | +0.028753 | 643.1971            |           |
| +0.313081           | 1287.111 |           | 2573.215 | 22  | E | 4  | 514.1545 | +0.05389  | 514.1545            |           |
| -0.089509           | 1322.63  |           | 2644.253 | 23  | A | 3  | 385.1119 | -0.023085 | 385.1119            |           |
| -0.018942           | 1351.141 |           | 2701.274 | 24  | G | 2  | 314.0748 | -0.03895  | 314.0748            |           |
| +0.482765           | 1386.659 |           | 2772.311 | 25  | A | 1  | 257.0533 |           | 257.0533            |           |
|                     |          |           |          | 26  | S | 0  | 186.0162 |           | 186.0162            |           |

**general information**

|                       |           |
|-----------------------|-----------|
| Annotation:           | 20 of 26  |
| AminoAcids Coverage:  | 77 %      |
| Intensity Coverage:   | 68 %      |
| Protein Localisation: | 72 ... 97 |

Source: 201205213\_VR\_Bsu\_TripleSILACrep1\_pL2ESLS\_F06  
 Scannumber: 10836  
 Protein: BSU09410; phoA; phoAIV  
 Peptide Score: 63.75  
 Method: ITMS; CID; 3

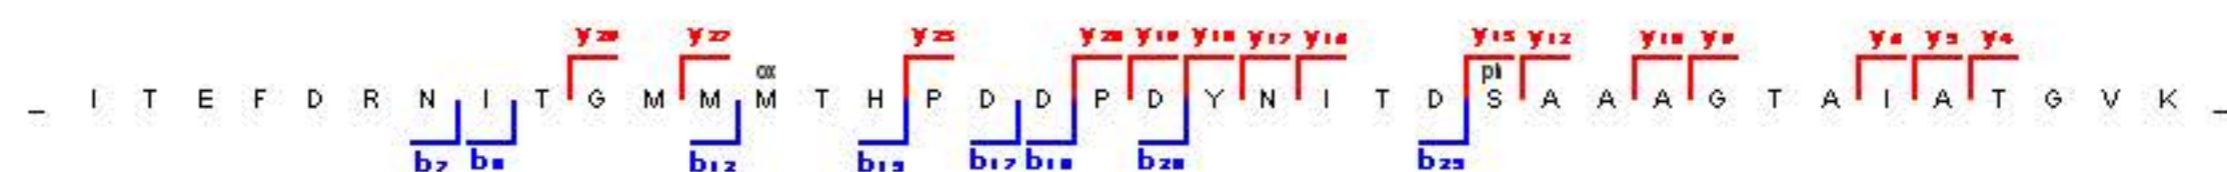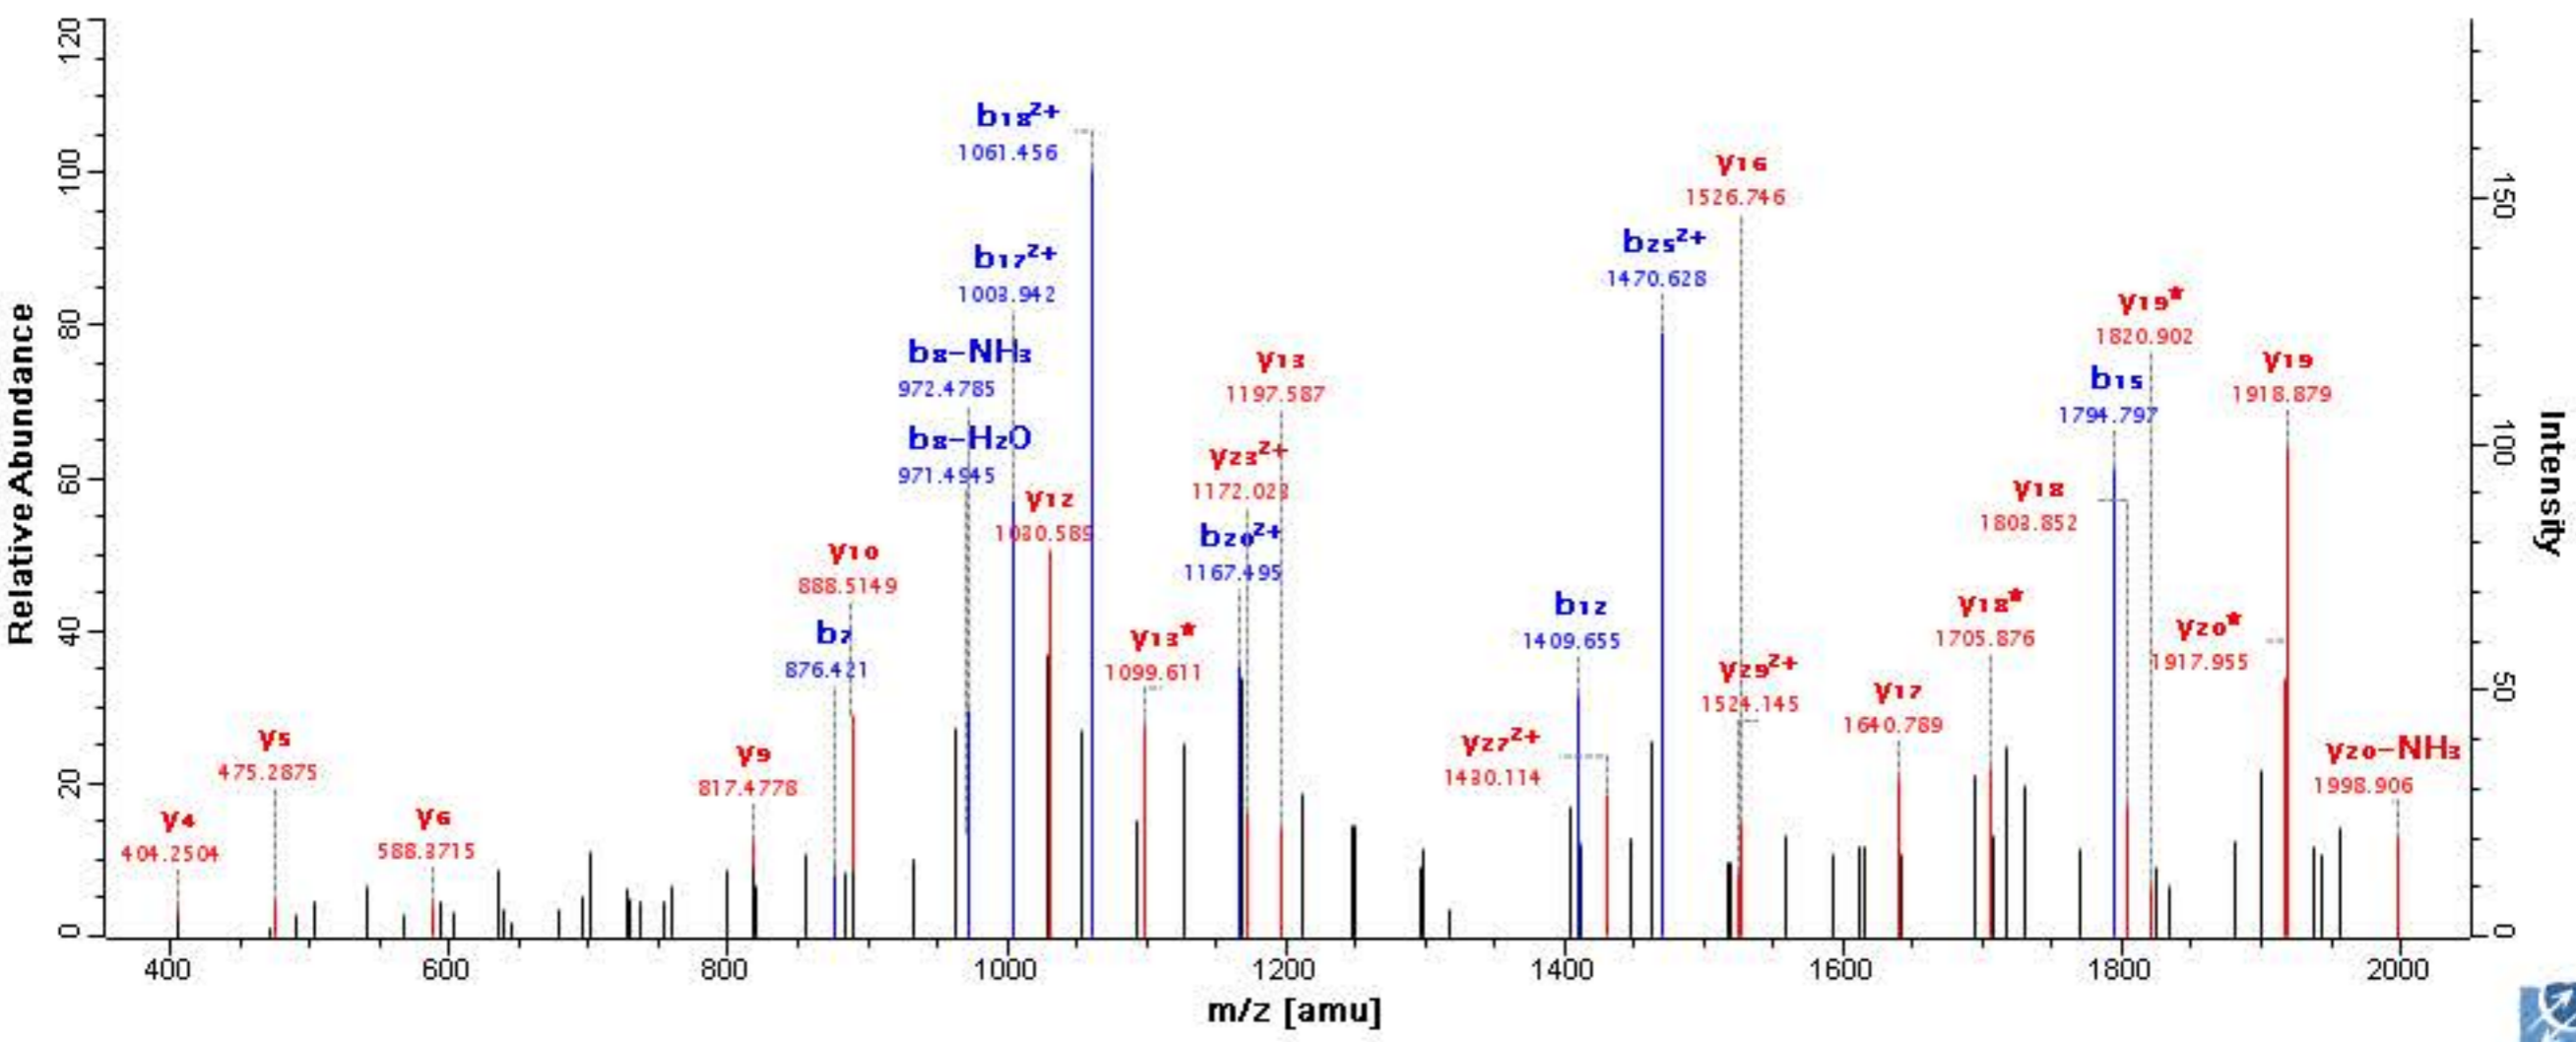

**precursor information**

|                   |                     |
|-------------------|---------------------|
| Mass:             | 4135.82044          |
| m/z:              | System.Collections. |
| Charge:           | System.Collections. |
| Retentiontime:    | System.Collections. |
| Score:            | 63.75121            |
| Mass Error [ppm]: | -0.2339             |
| PEP:              | 4.3939E-08          |
| Precursor Type:   | ISO                 |

| b <sup>2+</sup> ion |          | b ion     |          | seq |   | y ion    |          | y <sup>2+</sup> ion |                    |
|---------------------|----------|-----------|----------|-----|---|----------|----------|---------------------|--------------------|
| Δ dalton            | mass     | Δ dalton  | mass     |     |   | Δ dalton | mass     | Δ dalton            | mass               |
|                     | 114.0913 |           | 114.0913 | 1   | I | 37       |          |                     |                    |
|                     | 215.139  |           | 215.139  | 2   | T | 36       | 4023.745 |                     | 4023.745           |
|                     | 344.1816 |           | 344.1816 | 3   | E | 35       | 3922.697 |                     | 3922.697           |
|                     | 491.25   |           | 491.25   | 4   | F | 34       | 3793.654 |                     | 3793.654           |
|                     | 606.277  |           | 606.277  | 5   | D | 33       | 3646.586 |                     | 3646.586           |
|                     | 762.3781 |           | 762.3781 | 6   | R | 32       | 3531.559 |                     | 3531.559           |
|                     | 876.421  | -0.161364 | 876.421  | 7   | N | 31       | 3375.458 |                     | 3375.458           |
|                     | 989.5051 |           | 989.5051 | 8   | I | 30       | 3261.415 |                     | 3261.415           |
|                     | 1090.553 |           | 1090.553 | 9   | T | 29       | 3148.331 |                     | 3148.331           |
|                     | 1147.574 |           | 1147.574 | 10  | G | 28       | 3047.283 |                     | 1524.145 +0.046038 |
|                     | 1278.615 |           | 1278.615 | 11  | M | 27       | 2990.262 |                     | 2990.262           |
|                     | 1409.655 | -0.038362 | 1409.655 | 12  | M | 26       | 2859.221 |                     | 1430.114 +0.288438 |
|                     | 1556.691 |           | 1556.691 | 13  | M | 25       | 2728.181 |                     | 2728.181           |
|                     | 1657.738 |           | 1657.738 | 14  | T | 24       | 2581.145 |                     | 2581.145           |
|                     | 1794.797 | +0.227486 | 1794.797 | 15  | H | 23       | 2480.098 |                     | 2480.098           |
|                     | 1891.85  |           | 1891.85  | 16  | P | 22       | 2343.039 |                     | 1172.023 +0.41471  |
| +0.046936           | 1003.942 |           | 2006.877 | 17  | D | 21       | 2245.986 |                     | 2245.986           |
| -0.041365           | 1061.456 |           | 2121.904 | 18  | D | 20       | 2130.959 |                     | 2130.959           |
|                     | 2218.957 |           | 2218.957 | 19  | P | 19       | 2015.932 |                     | 2015.932           |
| +0.008992           | 1167.495 |           | 2333.984 | 20  | D | 18       | 1918.879 | +0.137955           | 1918.879           |
|                     | 2497.047 |           | 2497.047 | 21  | Y | 17       | 1803.852 | +0.314312           | 1803.852           |
|                     | 2611.09  |           | 2611.09  | 22  | N | 16       | 1640.789 | -0.497969           | 1640.789           |
|                     | 2724.174 |           | 2724.174 | 23  | I | 15       | 1526.746 | +0.133825           | 1526.746           |
|                     | 2825.222 |           | 2825.222 | 24  | T | 14       | 1413.662 |                     | 1413.662           |
| +0.348811           | 1470.628 |           | 2940.248 | 25  | D | 13       | 1312.614 |                     | 1312.614           |
|                     | 3107.247 |           | 3107.247 | 26  | S | 12       | 1197.587 | -0.01828            | 1197.587           |
|                     | 3178.284 |           | 3178.284 | 27  | A | 11       | 1030.589 | -0.238549           | 1030.589           |
|                     | 3249.321 |           | 3249.321 | 28  | A | 10       | 959.552  |                     | 959.552            |
|                     | 3320.358 |           | 3320.358 | 29  | A | 9        | 888.5149 | +0.207138           | 888.5149           |
|                     | 3377.38  |           | 3377.38  | 30  | G | 8        | 817.4778 | +0.046315           | 817.4778           |
|                     | 3478.427 |           | 3478.427 | 31  | T | 7        | 760.4563 |                     | 760.4563           |
|                     | 3549.464 |           | 3549.464 | 32  | A | 6        | 659.4087 |                     | 659.4087           |
|                     | 3662.548 |           | 3662.548 | 33  | I | 5        | 588.3715 | -0.063738           | 588.3715           |
|                     | 3733.586 |           | 3733.586 | 34  | A | 4        | 475.2875 | +0.006807           | 475.2875           |
|                     | 3834.633 |           | 3834.633 | 35  | T | 3        | 404.2504 | -0.066828           | 404.2504           |
|                     | 3891.655 |           | 3891.655 | 36  | G | 2        | 303.2027 |                     | 303.2027           |
|                     | 3990.723 |           | 3990.723 | 37  | V | 1        | 246.1812 |                     | 246.1812           |
|                     |          |           |          | 38  | K | 0        | 147.1128 |                     | 147.1128           |

**general information**

|                       |            |
|-----------------------|------------|
| Annotation:           | 23 of 38   |
| AminoAcids Coverage:  | 61 %       |
| Intensity Coverage:   | 53 %       |
| Protein Localisation: | 83 ... 120 |

Source: 201205213\_VR\_Bsu\_TripleSILACrep1\_pL2ESLS\_F06  
 Scannumber: 11813  
 Protein: BSU23070; serA  
 Peptide Score: 111.38  
 Method: ITMS; CID; 3

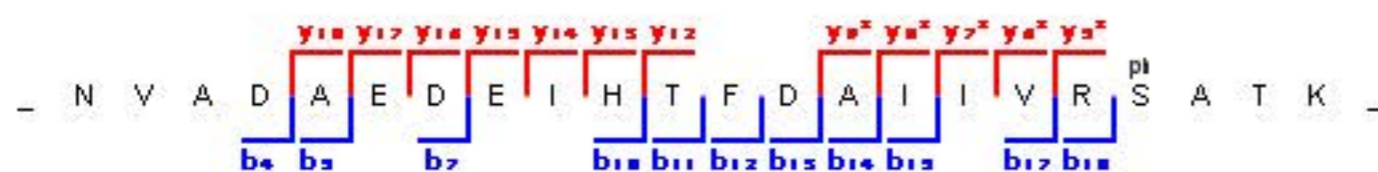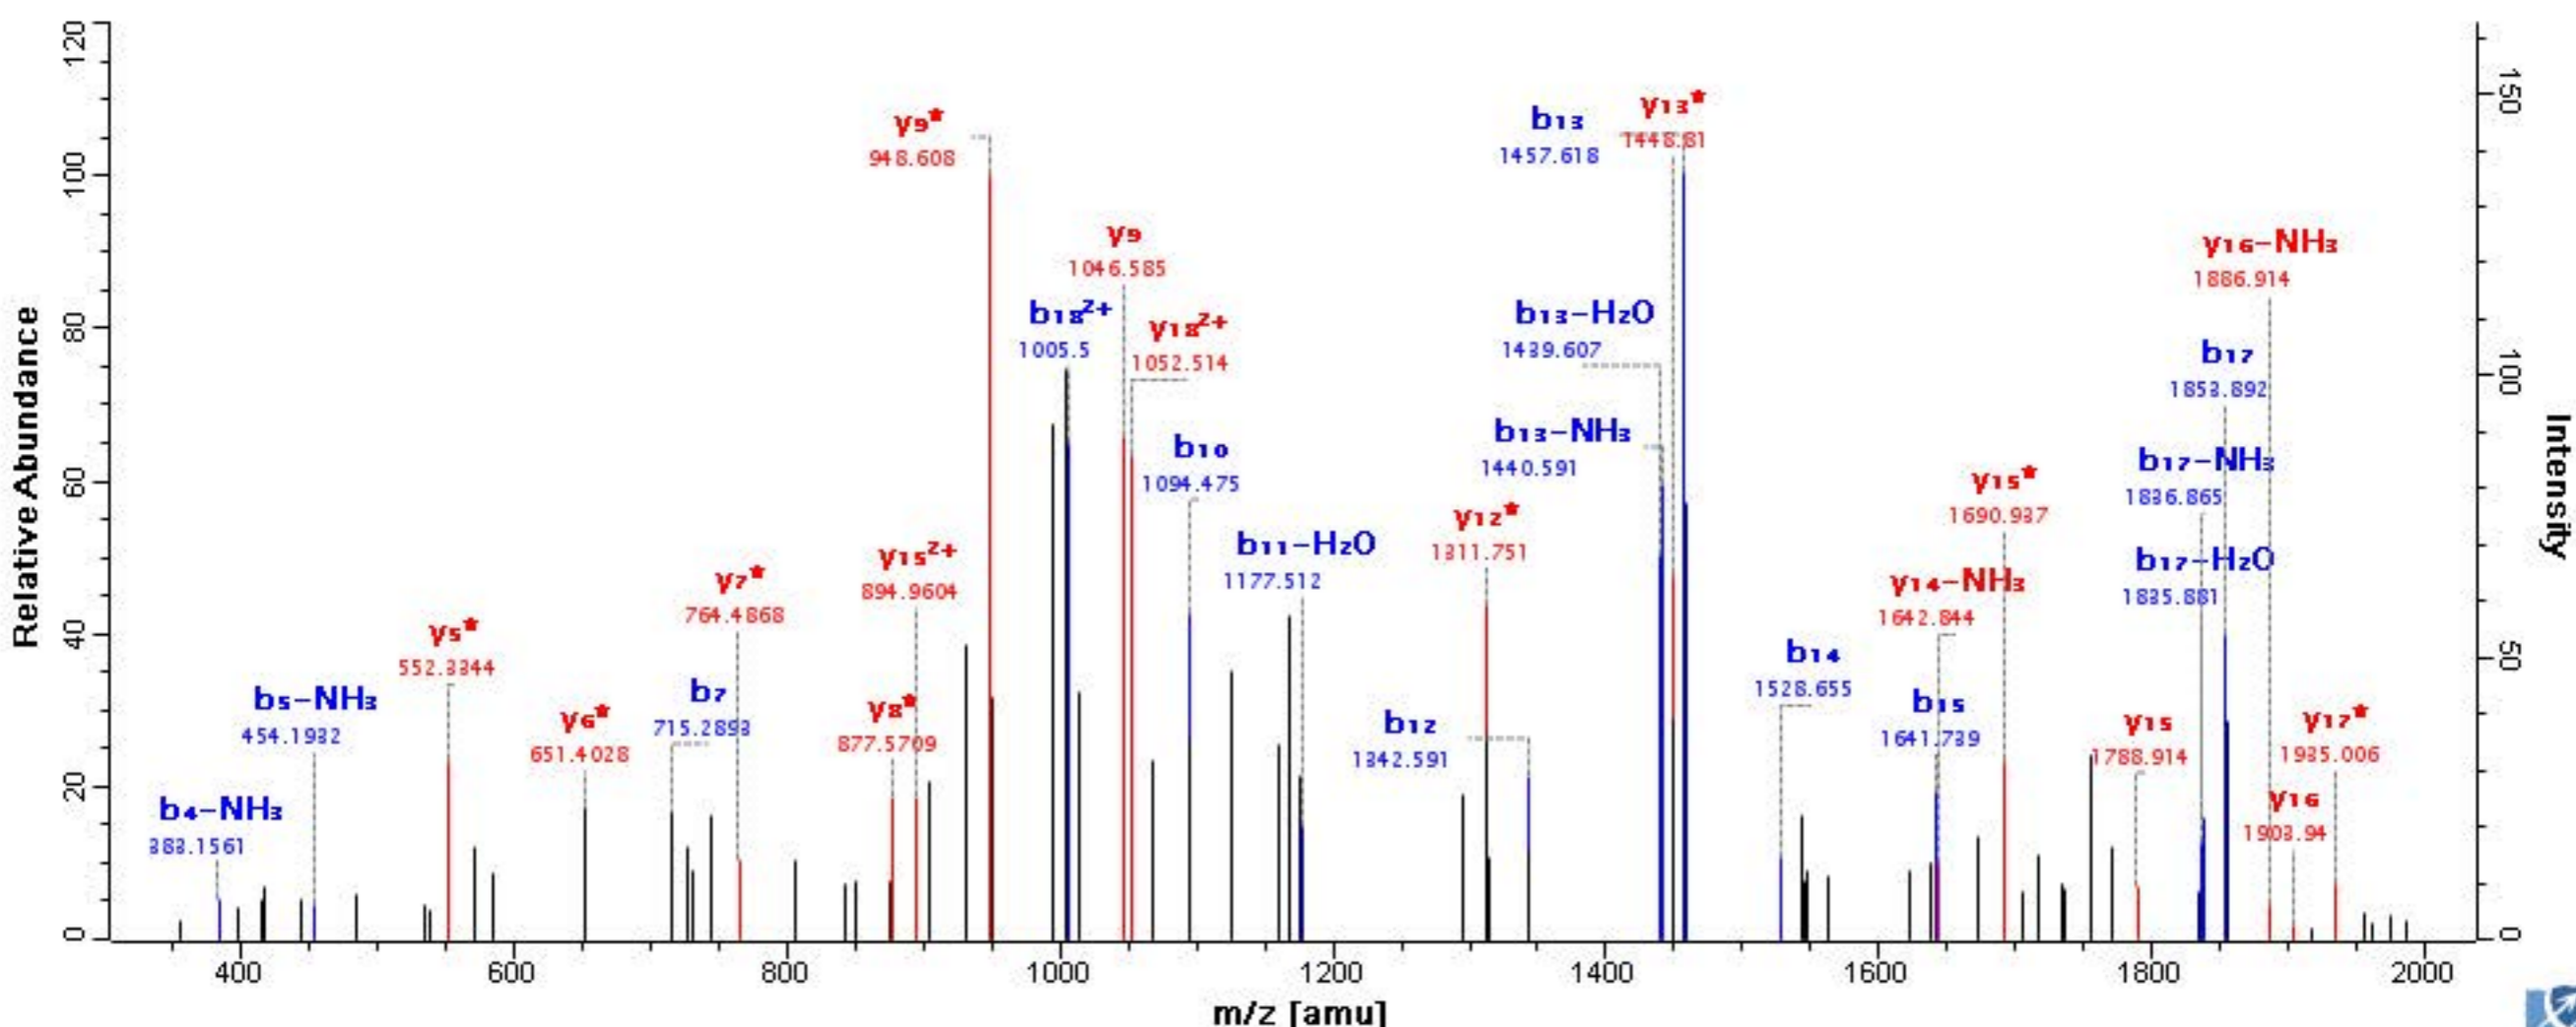

**precursor information**

|                   |                     |
|-------------------|---------------------|
| Mass:             | 2502.18899          |
| m/z:              | System.Collections. |
| Charge:           | System.Collections. |
| Retentiontime:    | System.Collections. |
| Score:            | 111.3772            |
| Mass Error [ppm]: | 0.27791             |
| PEP:              | 8.8654E-05          |
| Precursor Type:   | ISO                 |

| b <sup>2+</sup> ion |          | b ion     |          |     | γ ion |          | γ <sup>2+</sup> ion |           |          |
|---------------------|----------|-----------|----------|-----|-------|----------|---------------------|-----------|----------|
| Δ dalton            | mass     | Δ dalton  | mass     | seq |       | Δ dalton | mass                | Δ dalton  | mass     |
|                     | 115.0502 |           | 115.0502 | 1   | N     | 21       |                     |           |          |
|                     | 214.1186 |           | 214.1186 | 2   | V     | 20       | 2389.153            |           | 2389.153 |
|                     | 285.1557 |           | 285.1557 | 3   | A     | 19       | 2290.084            |           | 2290.084 |
|                     | 400.1827 |           | 400.1827 | 4   | D     | 18       | 2219.047            |           | 2219.047 |
|                     | 471.2198 |           | 471.2198 | 5   | A     | 17       | 2104.02             |           | 1052.514 |
|                     | 600.2624 |           | 600.2624 | 6   | E     | 16       | 2032.983            |           | 2032.983 |
|                     | 715.2893 | -0.064227 | 715.2893 | 7   | D     | 15       | 1903.94             | -0.055336 | 1903.94  |
|                     | 844.3319 |           | 844.3319 | 8   | E     | 14       | 1788.914            | +0.326953 | 894.9604 |
|                     | 957.416  |           | 957.416  | 9   | I     | 13       | 1659.871            |           | 1659.871 |
|                     | 1094.475 | -0.089395 | 1094.475 | 10  | H     | 12       | 1546.787            |           | 1546.787 |
|                     | 1195.523 |           | 1195.523 | 11  | T     | 11       | 1409.728            |           | 1409.728 |
|                     | 1342.591 | +0.079424 | 1342.591 | 12  | F     | 10       | 1308.68             |           | 1308.68  |
|                     | 1457.618 | -0.139535 | 1457.618 | 13  | D     | 9        | 1161.612            |           | 1161.612 |
|                     | 1528.655 | -0.211927 | 1528.655 | 14  | A     | 8        | 1046.585            | -0.354452 | 1046.585 |
|                     | 1641.739 | -0.019624 | 1641.739 | 15  | I     | 7        | 975.5478            |           | 975.5478 |
|                     | 1754.823 |           | 1754.823 | 16  | I     | 6        | 862.4637            |           | 862.4637 |
|                     | 1853.892 | +0.048601 | 1853.892 | 17  | V     | 5        | 749.3797            |           | 749.3797 |
| +0.315322           | 1005.5   |           | 2009.993 | 18  | R     | 4        | 650.3113            |           | 650.3113 |
|                     | 2176.991 |           | 2176.991 | 19  | S     | 3        | 494.2102            |           | 494.2102 |
|                     | 2248.028 |           | 2248.028 | 20  | A     | 2        | 327.2118            |           | 327.2118 |
|                     | 2349.076 |           | 2349.076 | 21  | T     | 1        | 256.1747            |           | 256.1747 |
|                     |          |           |          | 22  | K     | 0        | 155.127             |           | 155.127  |

**general information**

|                       |           |
|-----------------------|-----------|
| Annotation:           | 15 of 22  |
| AminoAcids Coverag    | 68 %      |
| Intensity Coverage:   | 48 %      |
| Protein Localisation: | 30 ... 51 |

Source: 201205213\_VR\_Bsu\_TripleSILACrep1\_pL2ESLS\_F06  
 Scannumber: 4546  
 Protein: BSU36890; ipc-35d; upp  
 Peptide Score: 96.82  
 Method: ITMS; CID; 3

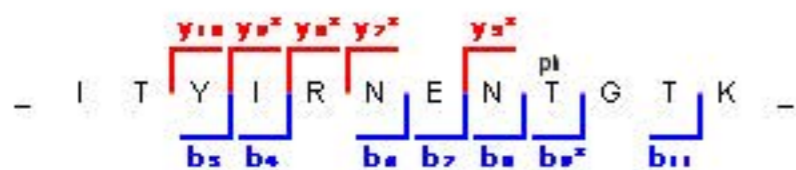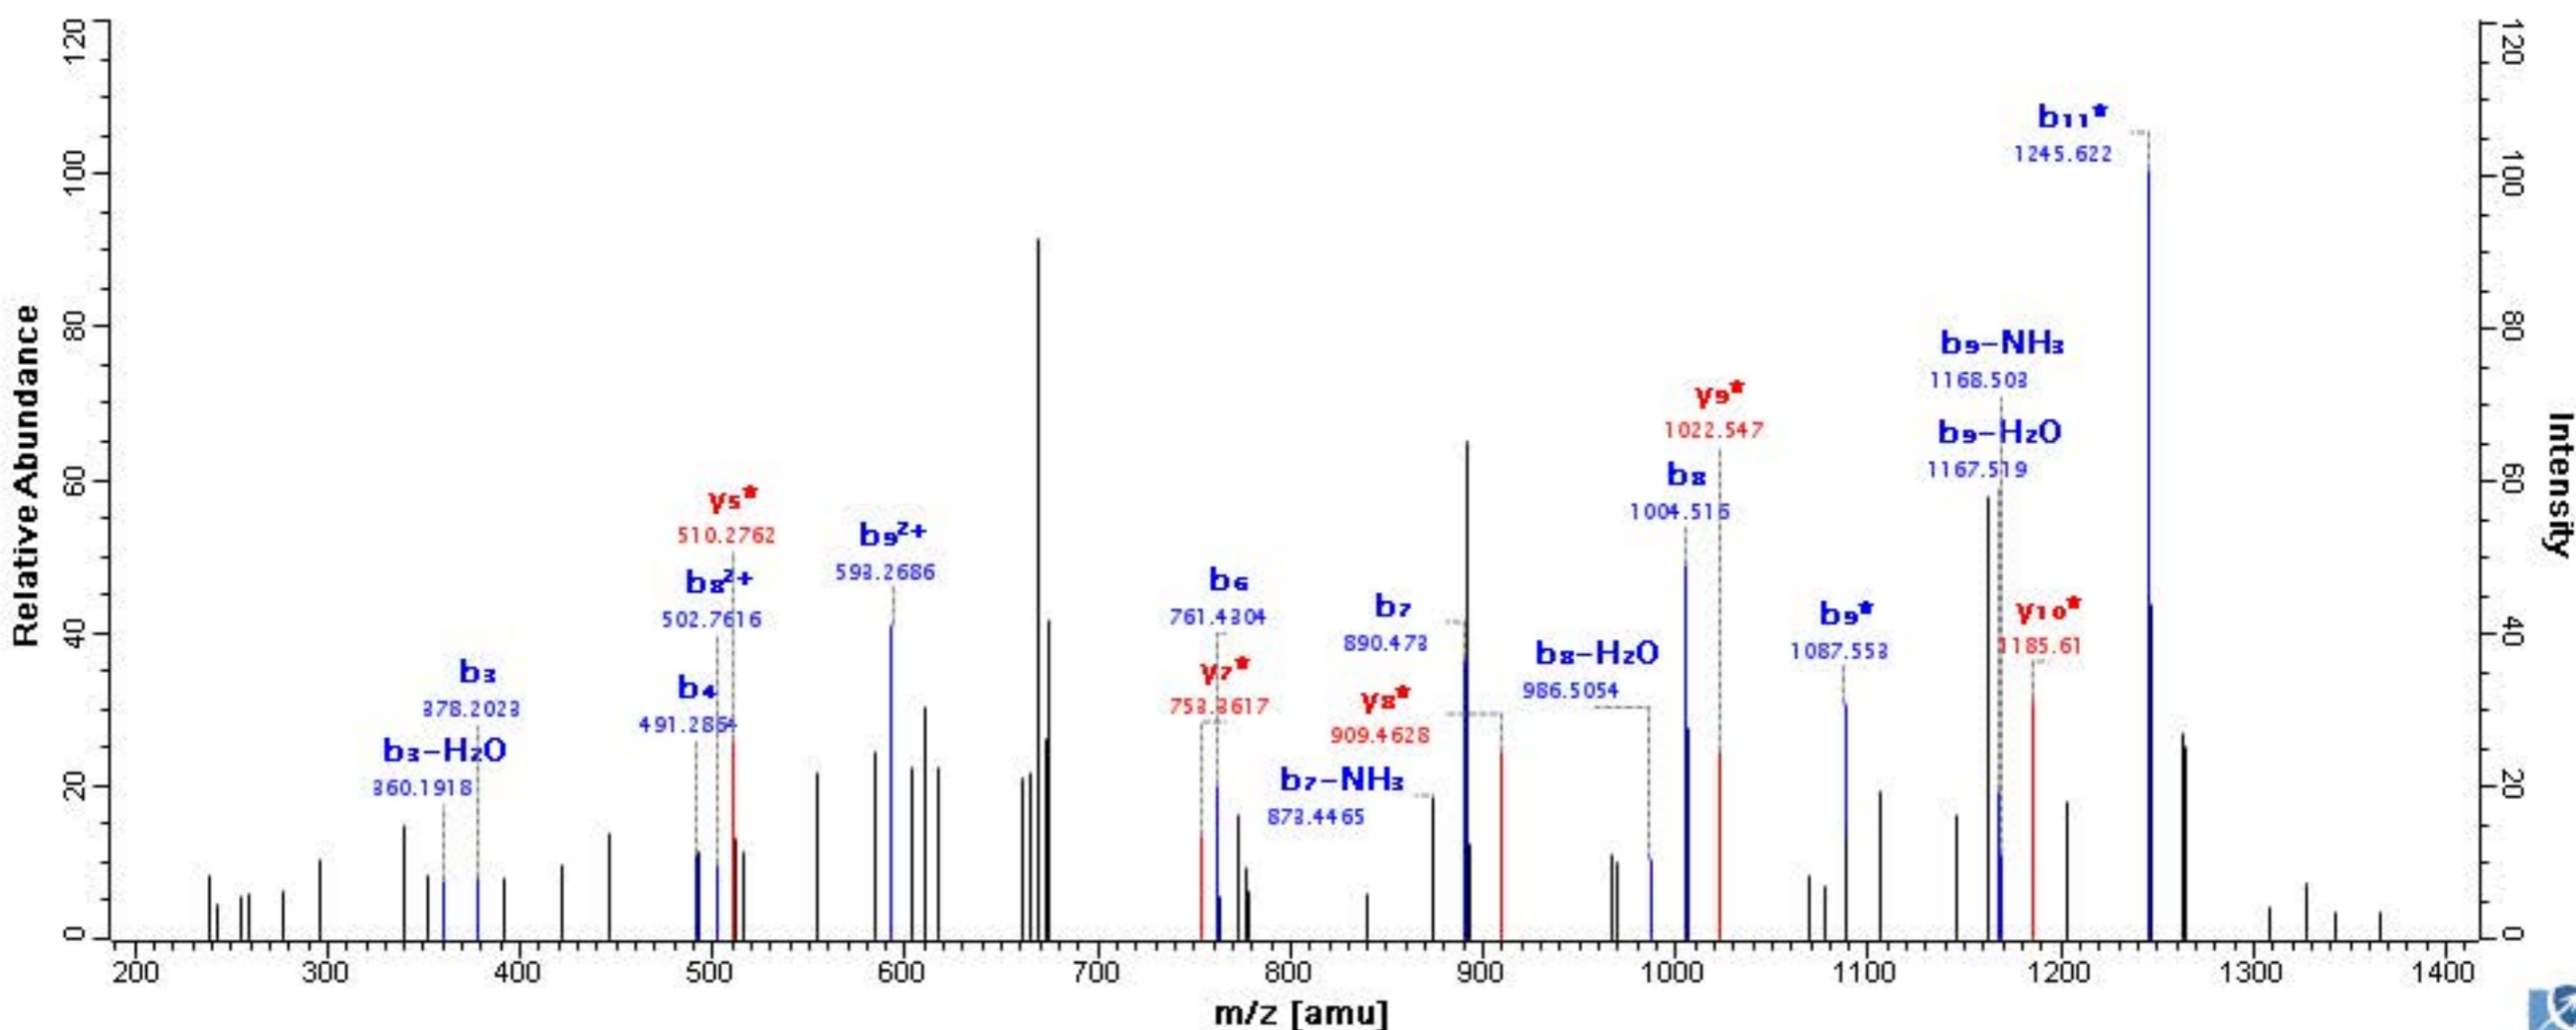

#### precursor information

|                   |                     |
|-------------------|---------------------|
| Mass:             | 1488.69685          |
| m/z:              | System.Collections. |
| Charge:           | System.Collections. |
| Retentiontime:    | System.Collections. |
| Score:            | 96.81993            |
| Mass Error [ppm]: | -0.35153            |
| PEP:              | 0.00048291          |
| Precursor Type:   | MULTI               |

#### general information

|                       |           |
|-----------------------|-----------|
| Annotation:           | 8 of 12   |
| AminoAcids Coverage:  | 67 %      |
| Intensity Coverage:   | 35 %      |
| Protein Localisation: | 16 ... 27 |

| b <sup>2+</sup> ion |              | b ion      |              |     | y ion |          |              |
|---------------------|--------------|------------|--------------|-----|-------|----------|--------------|
| Δ dalton            | mass         | Δ dalton   | mass         | seq |       | Δ dalton | mass         |
|                     | 114.09134045 |            | 114.09134045 | 1   | I     | 11       |              |
|                     | 215.13901892 |            | 215.13901892 | 2   | T     | 10       | 1384.6347841 |
|                     | 378.20234746 | -0.0438392 | 378.20234746 | 3   | Y     | 9        | 1283.5871056 |
|                     | 491.28641144 | -0.2863504 | 491.28641144 | 4   | I     | 8        | 1120.5237771 |
|                     | 647.38752247 |            | 647.38752247 | 5   | R     | 7        | 1007.4397131 |
|                     | 761.43044992 | +0.1309515 | 761.43044992 | 6   | N     | 6        | 851.33860205 |
|                     | 890.47304301 | -0.0293785 | 890.47304301 | 7   | E     | 5        | 737.29567461 |
| +0.1947364          | 502.76162346 | +0.1264246 | 1004.5159705 | 8   | N     | 4        | 608.25308151 |
| -0.2570312          | 593.2686279  |            | 1185.5299793 | 9   | T     | 3        | 494.21015406 |
|                     | 1242.5514431 |            | 1242.5514431 | 10  | G     | 2        | 313.19614518 |
|                     | 1343.5991215 |            | 1343.5991215 | 11  | T     | 1        | 256.17468146 |
|                     |              |            |              | 12  | K     | 0        | 155.12700298 |

Source: 201205213\_VR\_Bsu\_TripleSILACrep1\_pL2ESLS\_F06  
 Scannumber: 6025  
 Protein: BSU01050; rplL  
 Peptide Score: 176.87  
 Method: ITMS; CID; 3

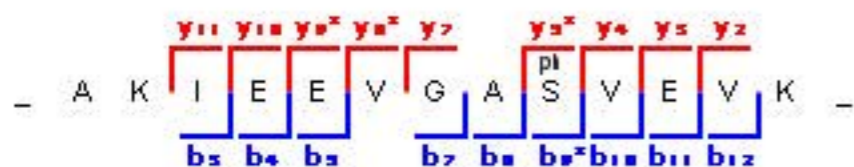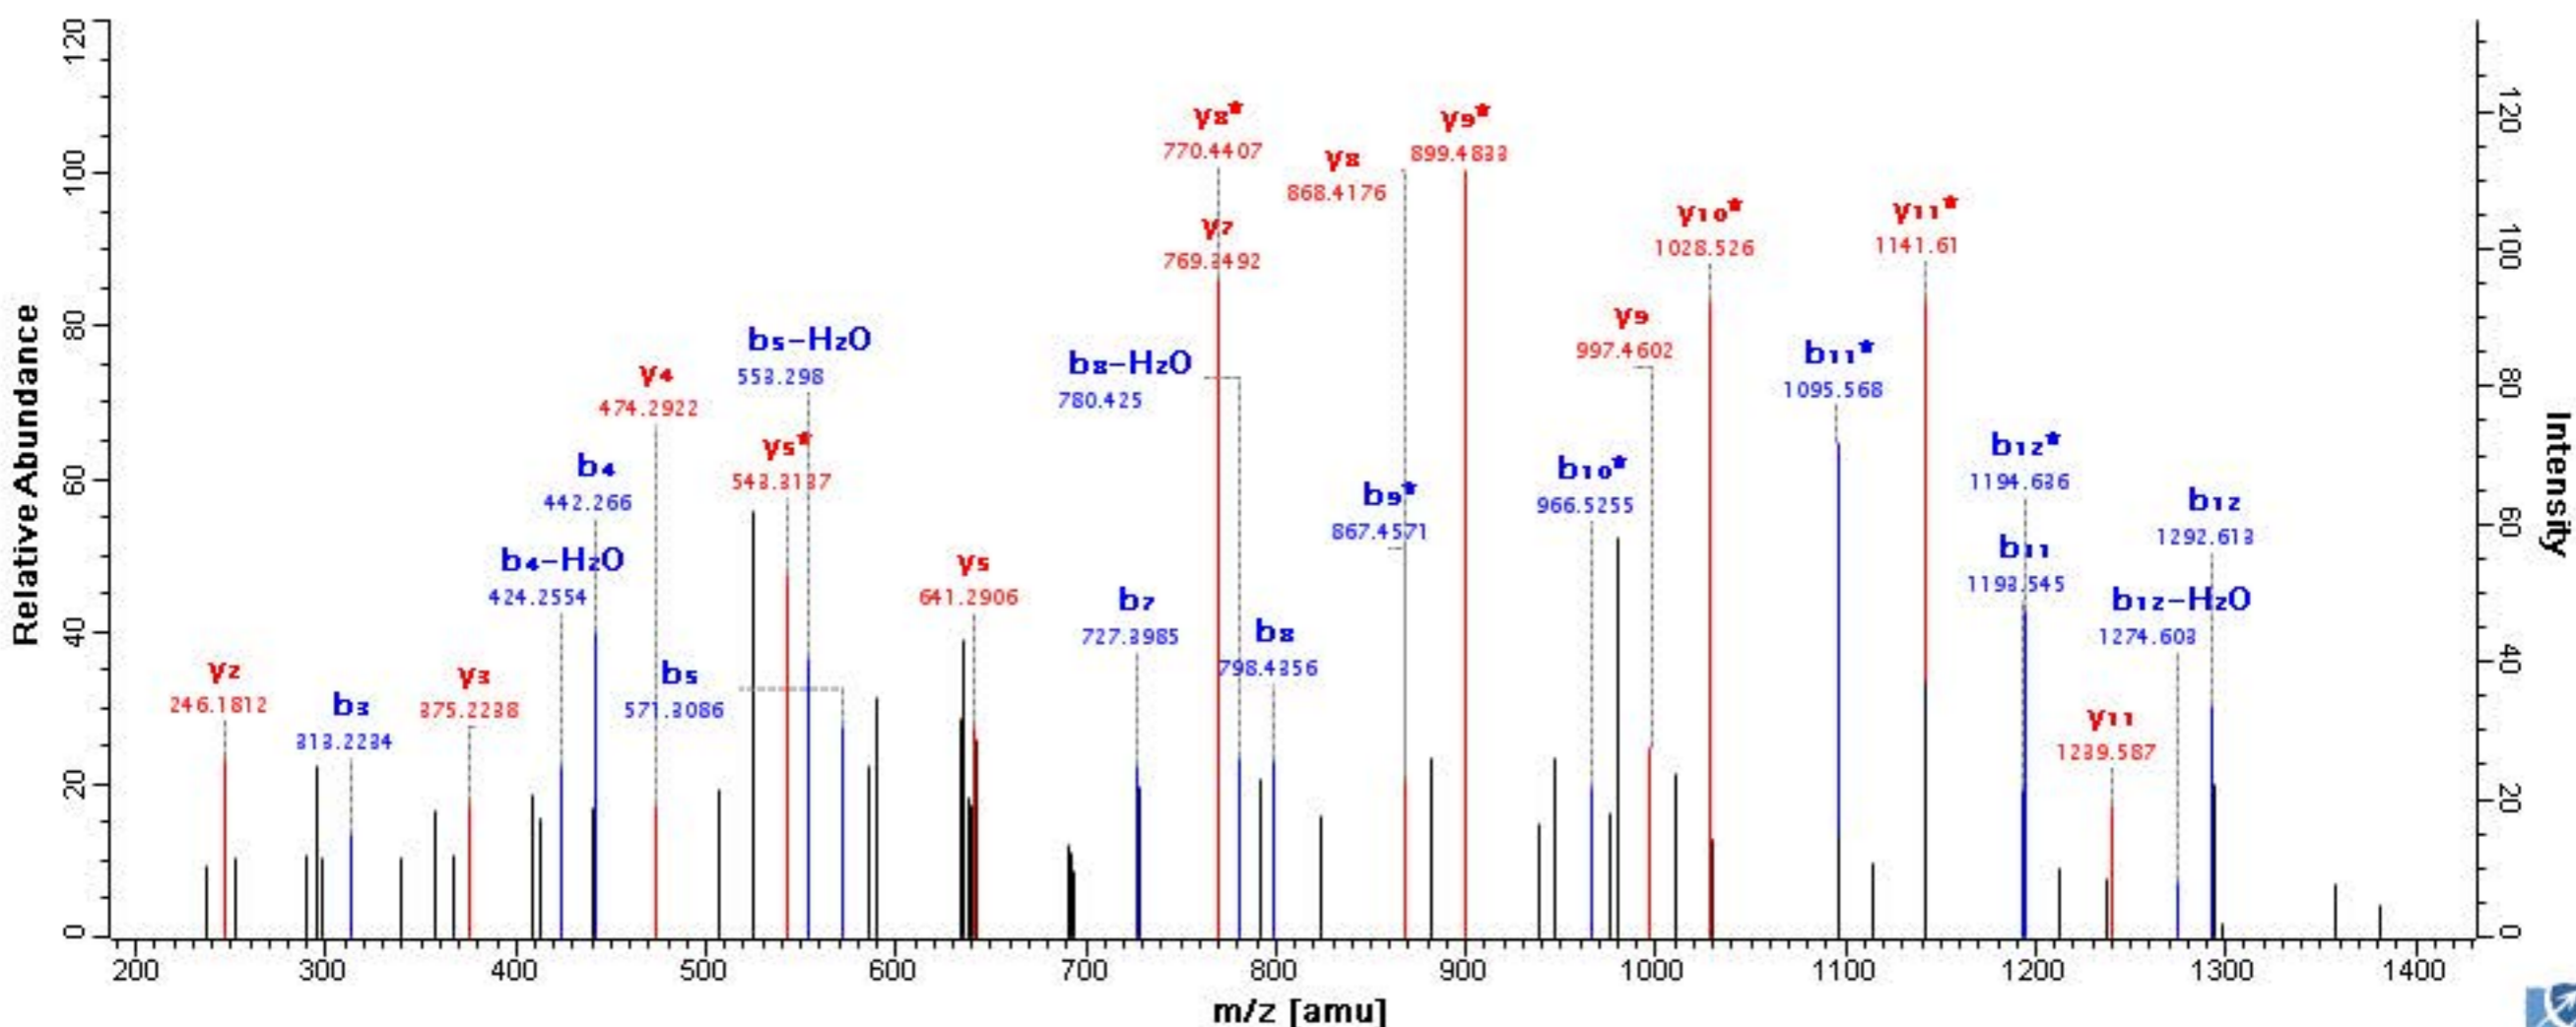

#### precursor information

|                   |                     |
|-------------------|---------------------|
| Mass:             | 1437.7117           |
| m/z:              | System.Collections. |
| Charge:           | System.Collections. |
| Retentiontime:    | System.Collections. |
| Score:            | 176.8723            |
| Mass Error [ppm]: | 0.049125            |
| PEP:              | 1.5005E-34          |
| Precursor Type:   | MULTI               |

#### general information

|                       |             |
|-----------------------|-------------|
| Annotation:           | 10 of 13    |
| AminoAcids Coverag    | 77 %        |
| Intensity Coverage:   | 56 %        |
| Protein Localisation: | 111 ... 123 |

| b ion      |                |    |     |    |                | gamma ion  |  |
|------------|----------------|----|-----|----|----------------|------------|--|
| Δ dalton   | mass           |    | seq |    | Δ dalton       | mass       |  |
|            | 72.044390254   | 1  | A   | 12 |                |            |  |
|            | 200.139353272  | 2  | K   | 11 | 1367.681788536 |            |  |
| +0.1880207 | 313.223417252  | 3  | I   | 10 | 1239.586825518 | -0.1066009 |  |
| -0.0594063 | 442.266010349  | 4  | E   | 9  | 1126.502761538 |            |  |
| -0.0656225 | 571.308603445  | 5  | E   | 8  | 997.460168441  | -0.2411133 |  |
|            | 670.377017361  | 6  | V   | 7  | 868.417575345  | -0.0847506 |  |
| +0.0751517 | 727.398481085  | 7  | G   | 6  | 769.349161429  | +0.0902307 |  |
| +0.0394417 | 798.435594873  | 8  | A   | 5  | 712.327697705  |            |  |
|            | 965.433953691  | 9  | S   | 4  | 641.290583918  | +0.2027633 |  |
|            | 1064.502367607 | 10 | V   | 3  | 474.292225099  | +0.0225942 |  |
| +0.0730813 | 1193.544960703 | 11 | E   | 2  | 375.223811183  | +0.154912  |  |
| -0.1145953 | 1292.613374619 | 12 | V   | 1  | 246.181218087  | +0.0364638 |  |
|            |                | 13 | K   | 0  | 147.112804171  |            |  |



Source: 201205213\_VR\_Bsu\_TripleSILACrep1\_pL2ESLS\_F06  
 Scannumber: 7501  
 Protein: BSU16090; sucC  
 Peptide Score: 126.1  
 Method: ITMS; CID; 3

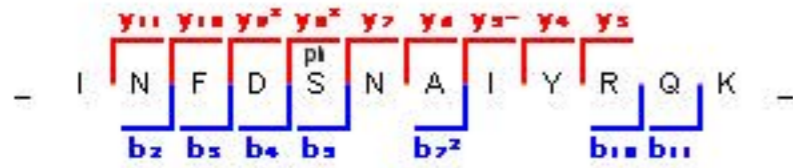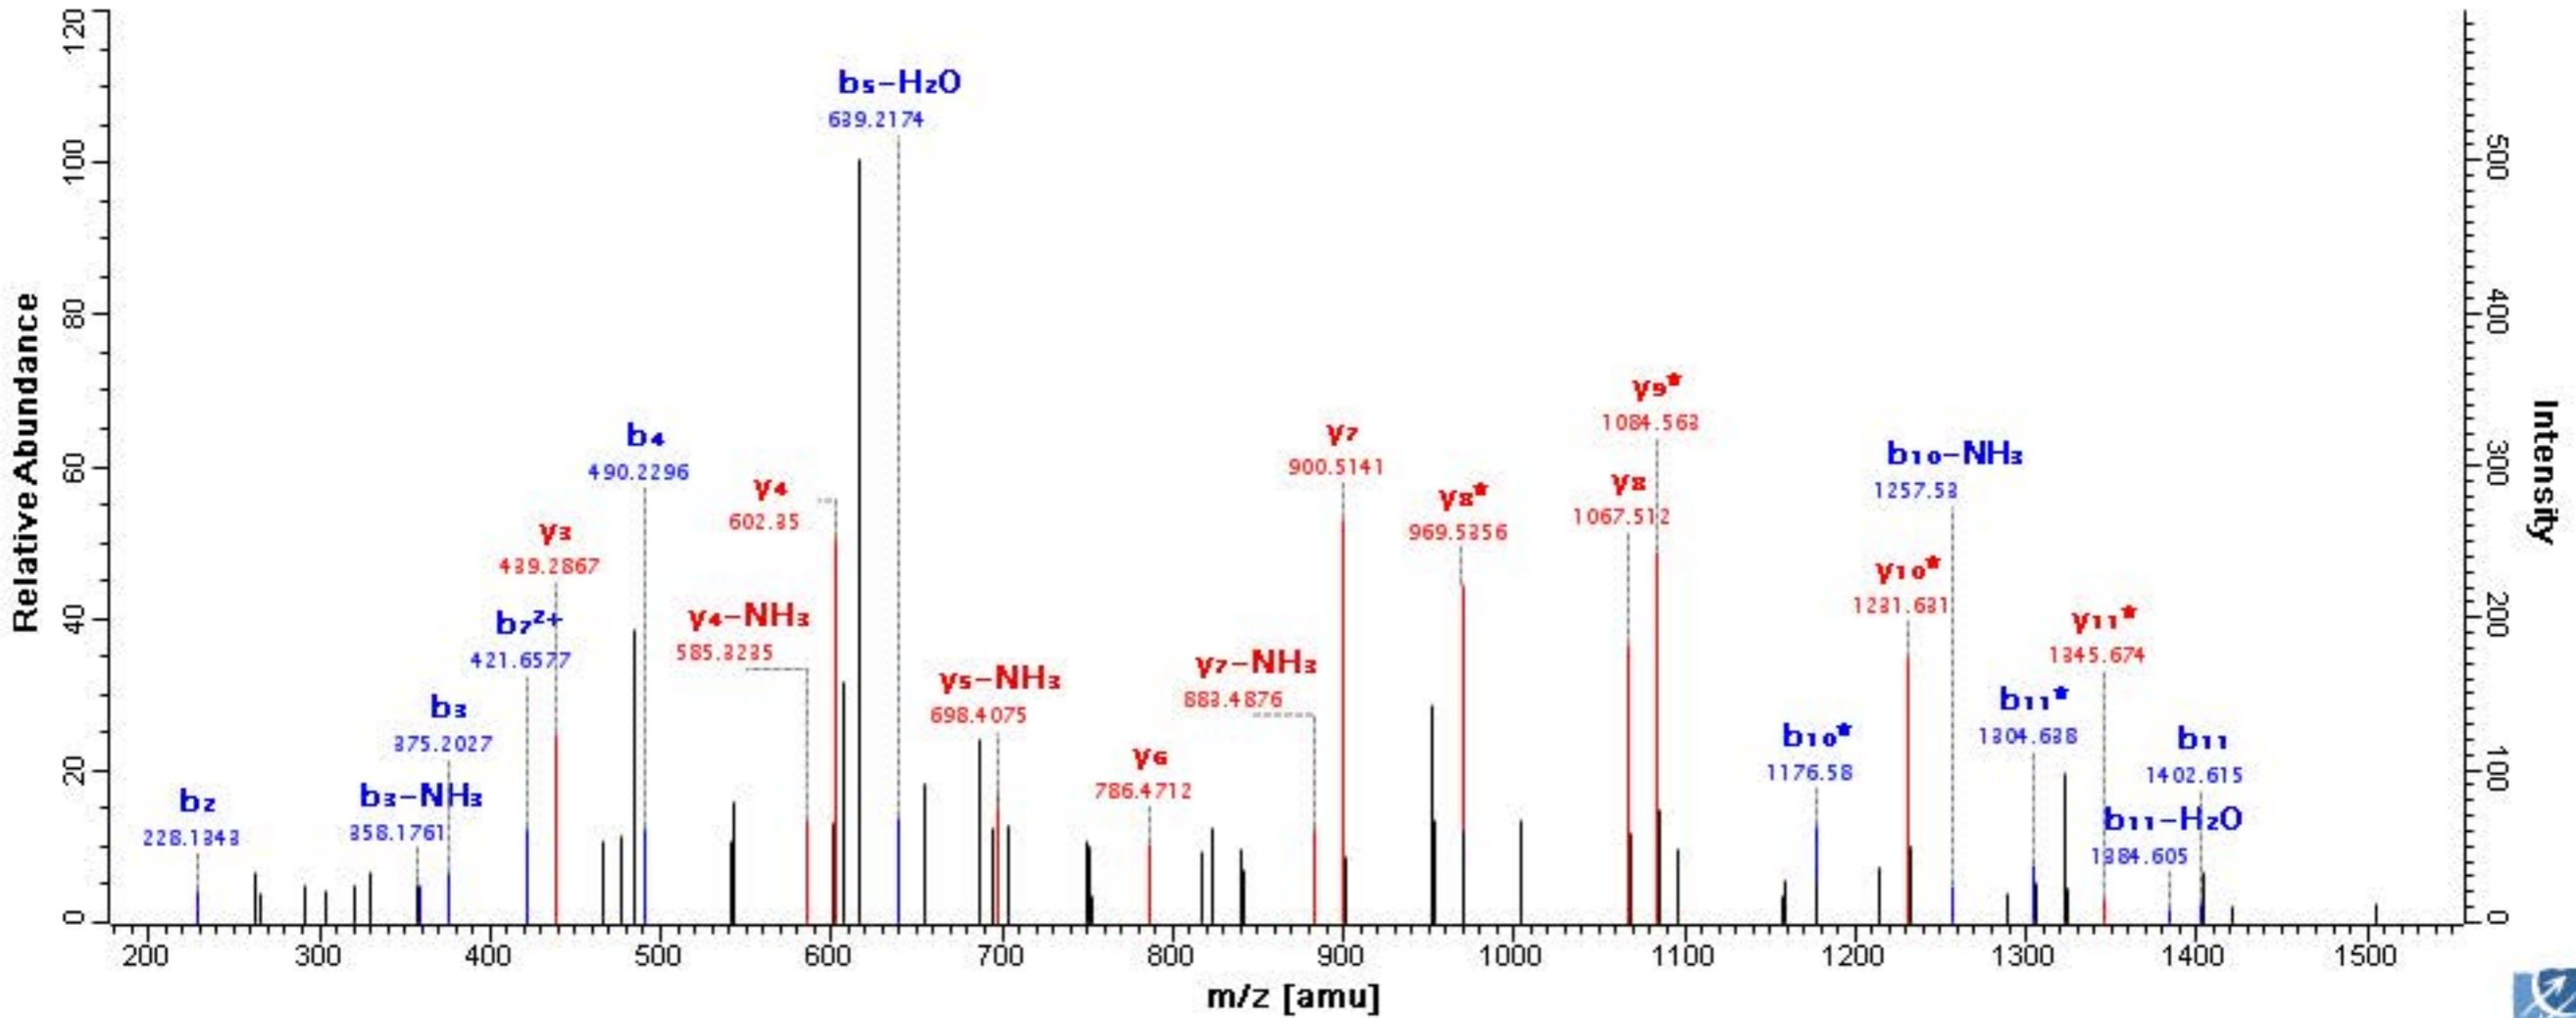

#### precursor information

|                   |                     |
|-------------------|---------------------|
| Mass:             | 1547.71356          |
| m/z:              | System.Collections. |
| Charge:           | System.Collections. |
| Retentiontime:    | System.Collections. |
| Score:            | 126.1012            |
| Mass Error [ppm]: | 0.12857             |
| PEP:              | 5.539E-08           |
| Precursor Type:   | MULTI               |

#### general information

|                       |             |
|-----------------------|-------------|
| Annotation:           | 10 of 12    |
| AminoAcids Coverag    | 83 %        |
| Intensity Coverage:   | 40 %        |
| Protein Localisation: | 216 ... 227 |

| b <sup>2+</sup> ion |              | b ion           |              |     | y ion |                 |              |            |
|---------------------|--------------|-----------------|--------------|-----|-------|-----------------|--------------|------------|
| $\Delta$ dalton     | mass         | $\Delta$ dalton | mass         | seq |       | $\Delta$ dalton | mass         |            |
|                     | 114.09134045 |                 | 114.09134045 | 1   | I     | 11              |              |            |
|                     | 228.13426789 | +0.0305118      | 228.13426789 | 2   | N     | 10              | 1443.6507685 |            |
|                     | 375.20268181 | +0.0551917      | 375.20268181 | 3   | F     | 9               | 1329.607841  |            |
|                     | 490.22962484 | +0.0851335      | 490.22962484 | 4   | D     | 8               | 1182.5394271 |            |
|                     | 657.22798366 |                 | 657.22798366 | 5   | S     | 7               | 1067.5124841 | +0.034513  |
|                     | 771.27091111 |                 | 771.27091111 | 6   | N     | 6               | 900.51412528 | +0.0527082 |
| -0.3520477          | 421.65765068 |                 | 842.3080249  | 7   | A     | 5               | 786.47119783 | +0.0397275 |
|                     | 955.39208888 |                 | 955.39208888 | 8   | I     | 4               | 715.43408404 |            |
|                     | 1118.4554174 |                 | 1118.4554174 | 9   | Y     | 3               | 602.35002006 | +0.0843671 |
|                     | 1274.5565284 |                 | 1274.5565284 | 10  | R     | 2               | 439.28669152 | +0.0482694 |
|                     | 1402.615106  | -0.1564878      | 1402.615106  | 11  | Q     | 1               | 283.1855805  |            |
|                     |              |                 |              | 12  | K     | 0               | 155.12700298 |            |
