# Supplementary material
Source: PubMed Central journal article supplement (PMC4125730)
Supplement: supp_M113.035949_mcp.M113.035949-6.pdf [file supp_M113.035949_mcp.M113.035949-6.pdf]

Source: 20120314\_VR\_TripleSILAC\_pT1L1T2\_F04  
 Scannumber: 2376  
 Protein: BSU15150; ftsL; yllD; ylxB  
 Peptide Score: 75.51  
 Method: ITMS; CID; 3

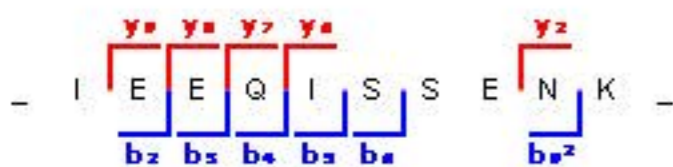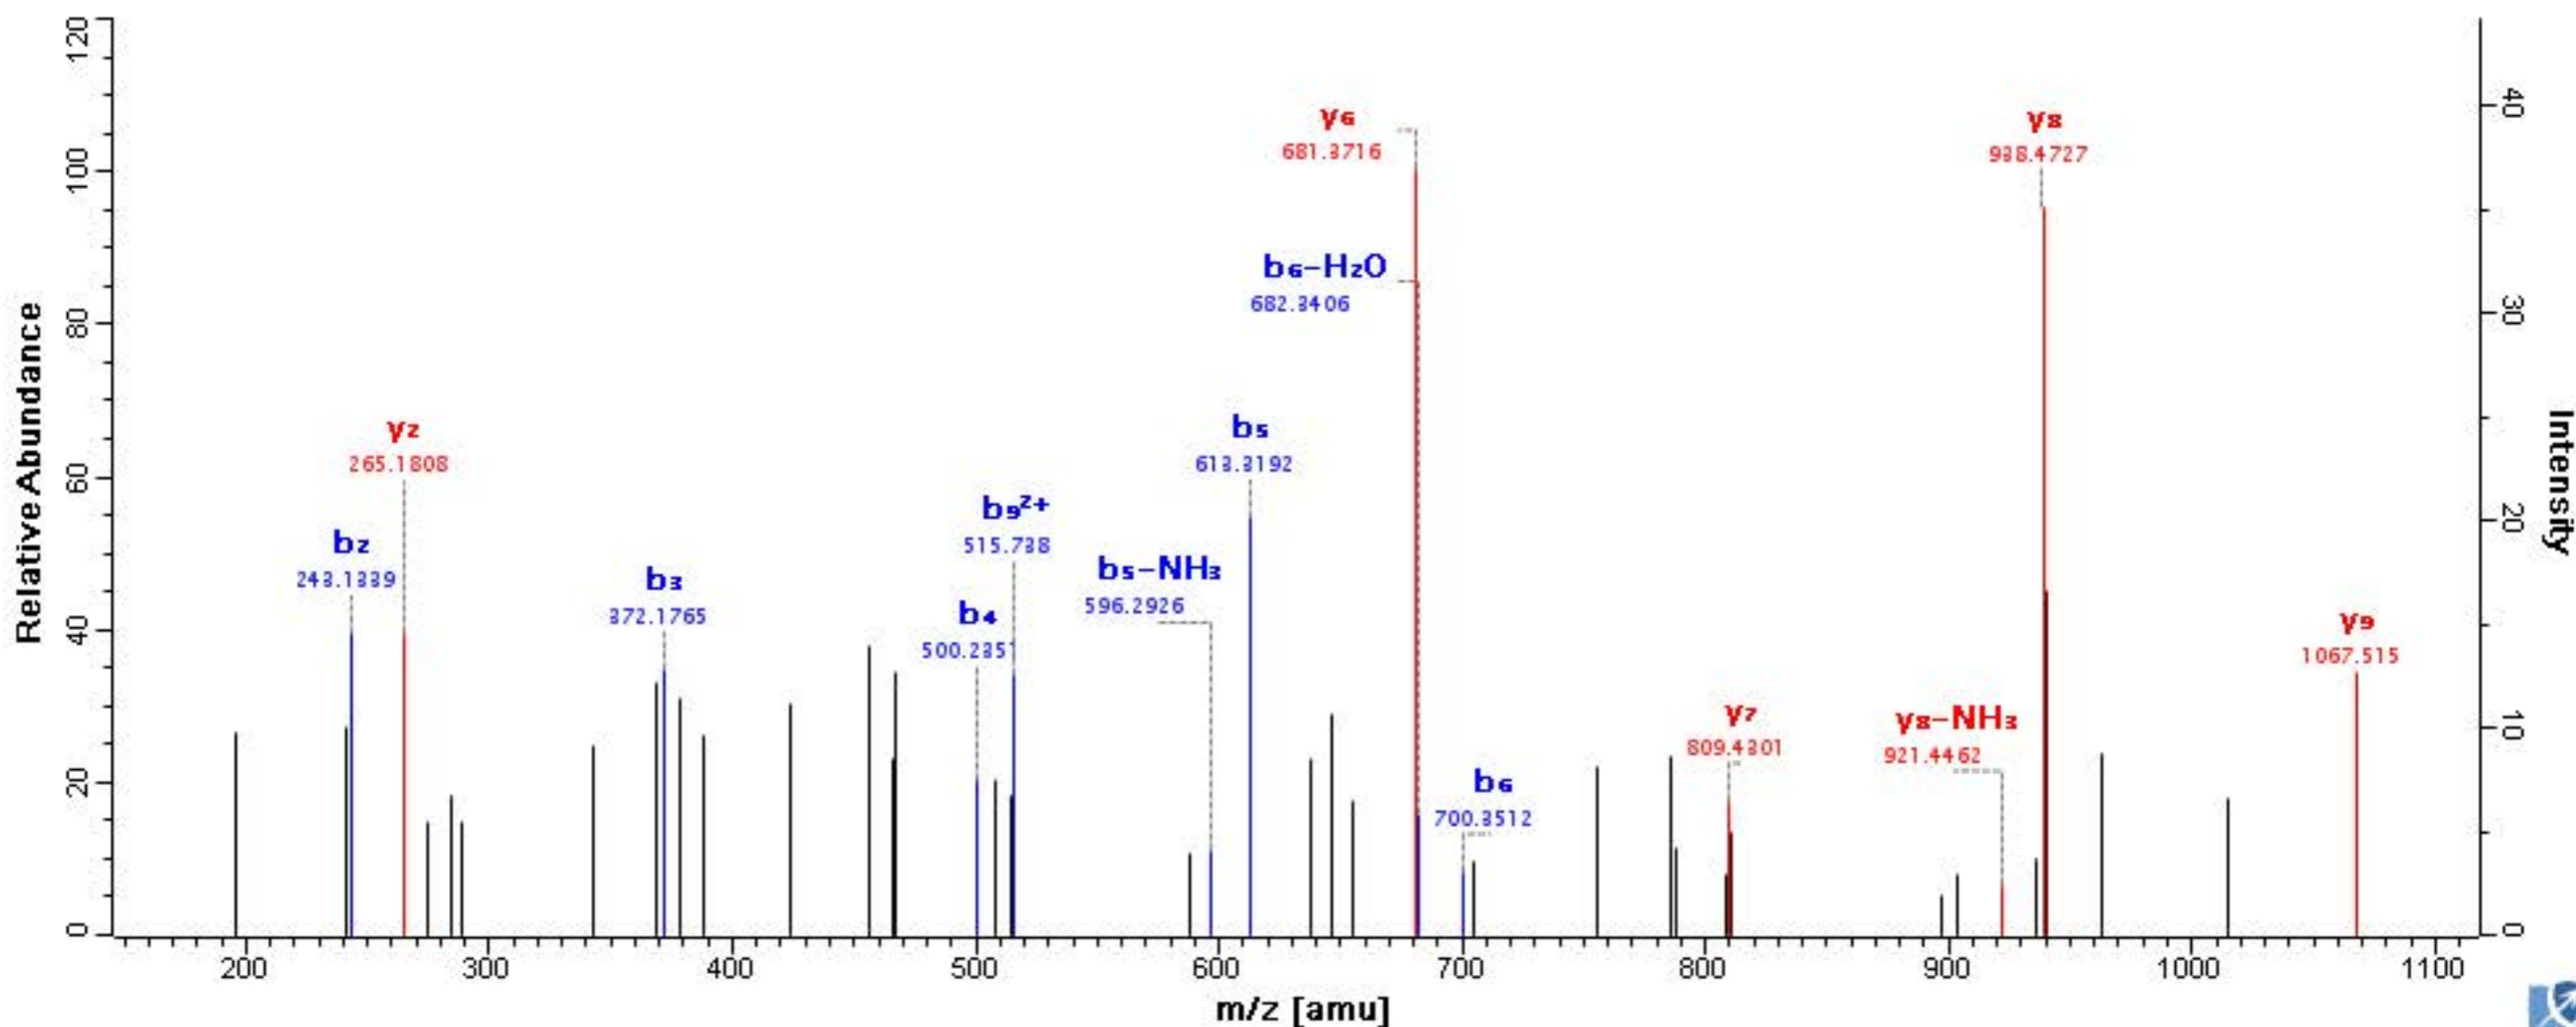

#### precursor information

|                   |                     |
|-------------------|---------------------|
| Mass:             | 1175.56683          |
| m/z:              | System.Collections. |
| Charge:           | System.Collections. |
| Retentiontime:    | System.Collections. |
| Score:            | 75.50899            |
| Mass Error [ppm]: | -0.14292            |
| PEP:              | 0.0046244           |
| Precursor Type:   | MULTI               |

#### general information

|                       |           |
|-----------------------|-----------|
| Annotation:           | 6 of 10   |
| AminoAcids Coverage:  | 60 %      |
| Intensity Coverage:   | 44 %      |
| Protein Localisation: | 69 ... 78 |

| b <sup>2+</sup> ion |              | b ion      |              |     | y ion    |      |              |
|---------------------|--------------|------------|--------------|-----|----------|------|--------------|
| Δ dalton            | mass         | Δ dalton   | mass         | seq | Δ dalton | mass |              |
|                     | 114.09134045 |            | 114.09134045 | 1   | I        | 9    |              |
|                     | 243.13393354 | +0.18998   | 243.13393354 | 2   | E        | 8    | 1067.5153162 |
|                     | 372.17652664 | -0.0183235 | 372.17652664 | 3   | E        | 7    | 938.47272311 |
|                     | 500.23510415 | +0.1014437 | 500.23510415 | 4   | Q        | 6    | 809.43013001 |
|                     | 613.31916813 | -0.0084992 | 613.31916813 | 5   | I        | 5    | 681.3715525  |
|                     | 700.35119654 | +0.1171262 | 700.35119654 | 6   | S        | 4    | 568.28748852 |
|                     | 787.38322495 |            | 787.38322495 | 7   | S        | 3    | 481.25546011 |
|                     | 916.42581805 |            | 916.42581805 | 8   | E        | 2    | 394.2234317  |
| -0.3417097          | 515.73801098 |            | 1030.4687455 | 9   | N        | 1    | 265.1808386  |
|                     |              |            |              | 10  | K        | 0    | 151.13791115 |

Source: 20120314\_VR\_TripleSILAC\_pT1 L1 T2\_F09  
 Scannumber: 9284  
 Protein: BSU36390; flhP; yyyB  
 Peptide Score: 156.17  
 Method: ITMS; CID; 3

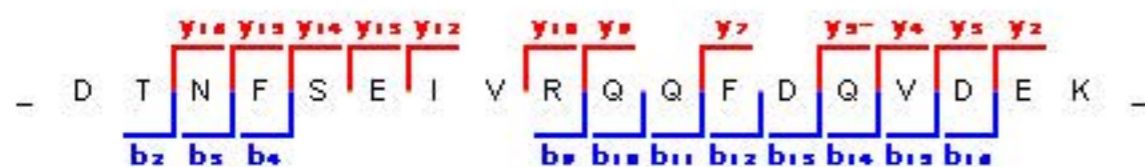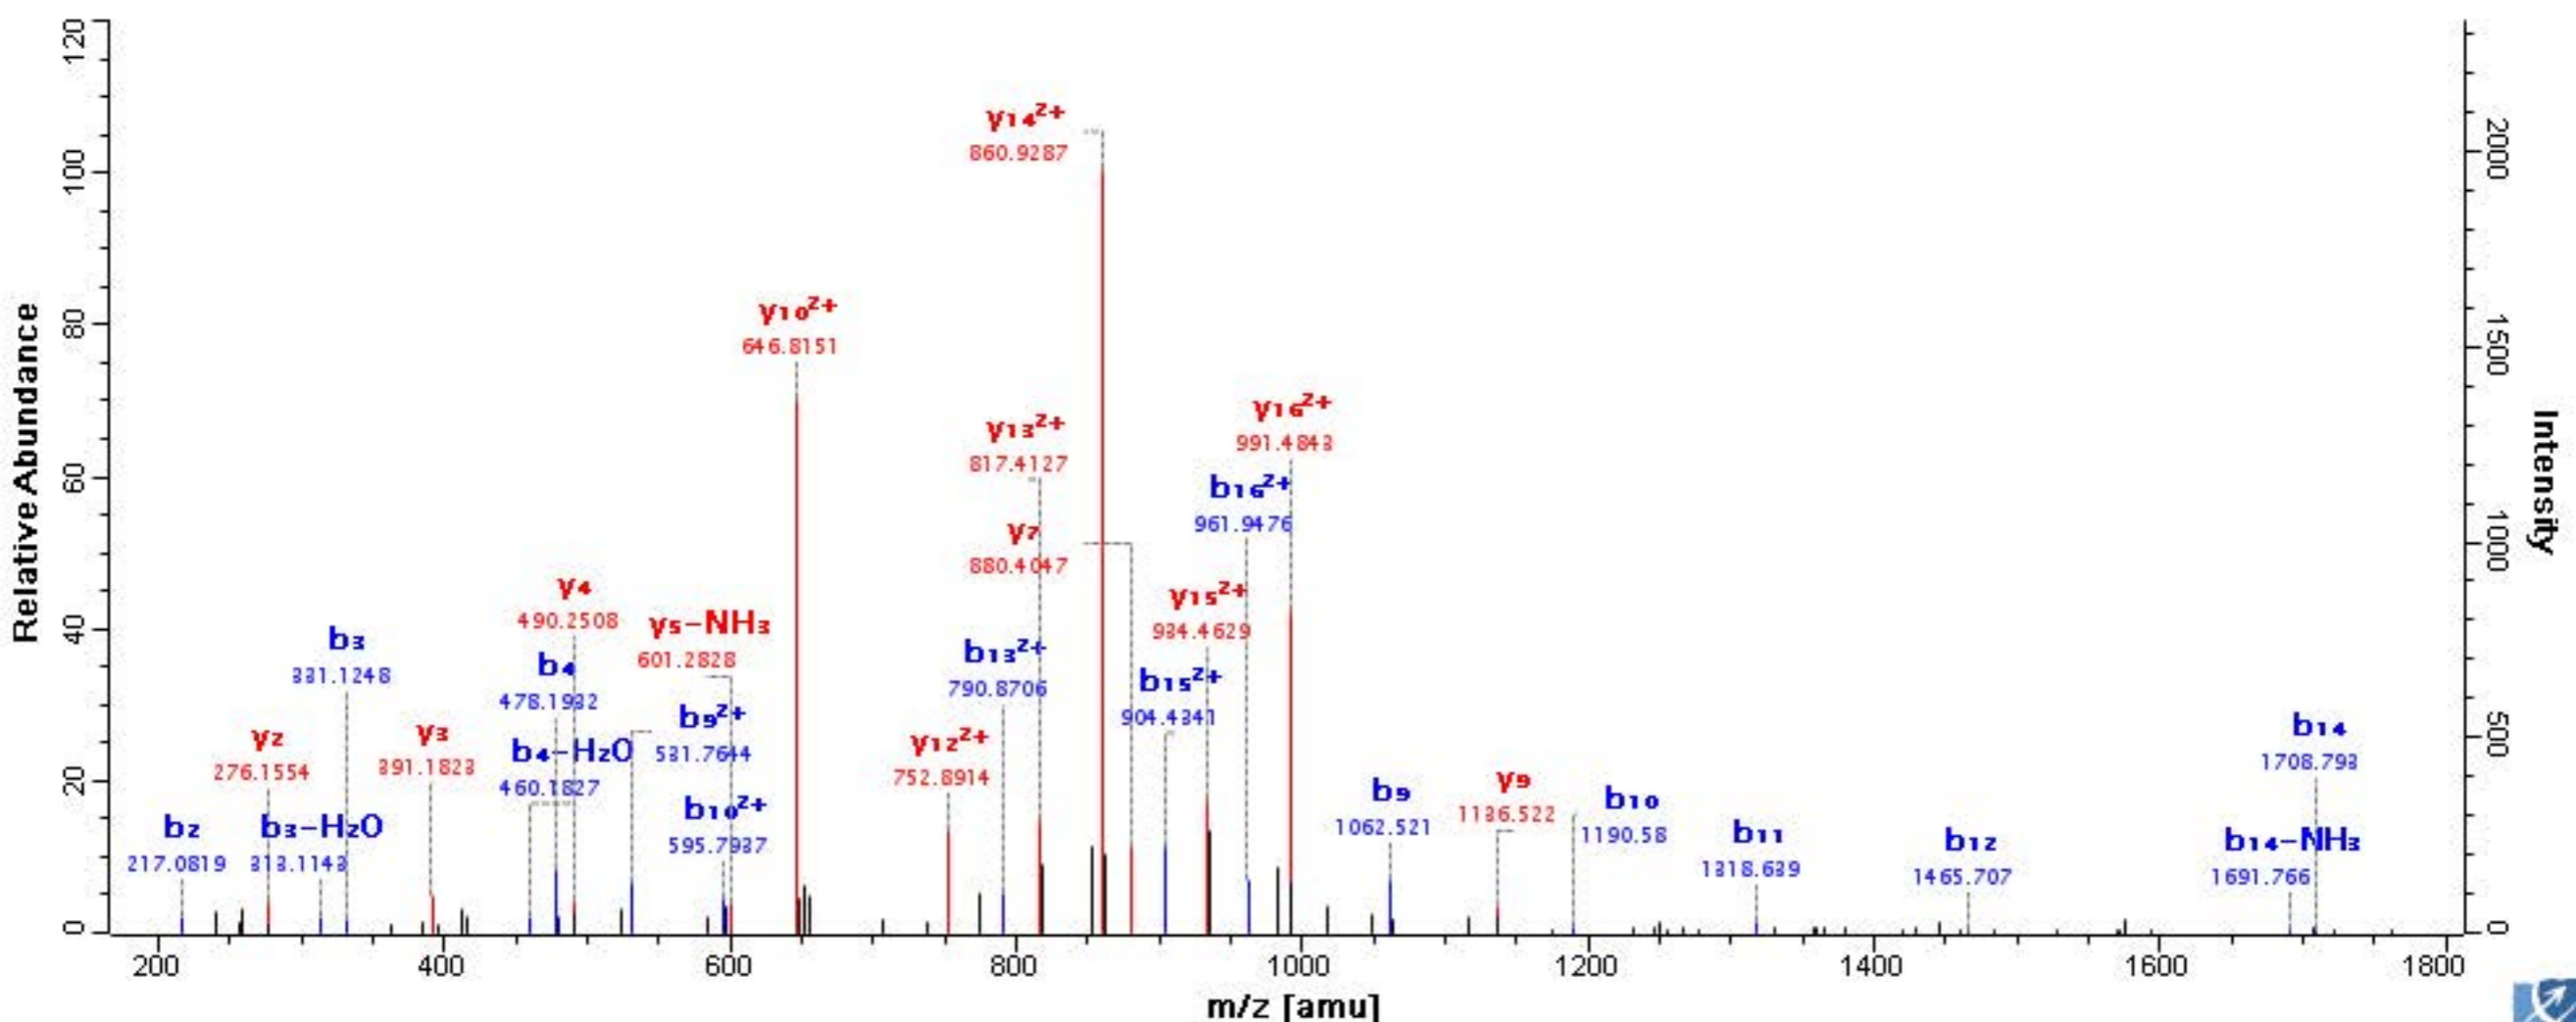

#### precursor information

|                   |                     |
|-------------------|---------------------|
| Mass:             | 2197.02784          |
| m/z:              | System.Collections. |
| Charge:           | System.Collections. |
| Retentiontime:    | System.Collections. |
| Score:            | 156.1734            |
| Mass Error [ppm]: | -0.41025            |
| PEP:              | 2.3514E-21          |
| Precursor Type:   | MULTI               |

#### general information

|                       |           |
|-----------------------|-----------|
| Annotation:           | 15 of 18  |
| AminoAcids Coverage:  | 83 %      |
| Intensity Coverage:   | 70 %      |
| Protein Localisation: | 38 ... 55 |

| b <sup>2+</sup> ion |          | b ion     |          |    |     |    | y ion    |           | y <sup>2+</sup> ion |           |
|---------------------|----------|-----------|----------|----|-----|----|----------|-----------|---------------------|-----------|
| Δ dalton            | mass     | Δ dalton  | mass     |    | seq |    | Δ dalton | mass      | Δ dalton            | mass      |
|                     | 116.0342 |           | 116.0342 | 1  | D   | 17 |          |           |                     |           |
|                     | 217.0819 | +0.122265 | 217.0819 | 2  | T   | 16 | 2083.009 |           | 2083.009            |           |
|                     | 331.1248 | +0.141532 | 331.1248 | 3  | N   | 15 | 1981.961 |           | 991.4843            | +0.313271 |
|                     | 478.1932 | +0.057005 | 478.1932 | 4  | F   | 14 | 1867.918 |           | 934.4629            | -0.052716 |
|                     | 565.2253 |           | 565.2253 | 5  | S   | 13 | 1720.85  |           | 860.9287            | +0.246933 |
|                     | 694.2679 |           | 694.2679 | 6  | E   | 12 | 1633.818 |           | 817.4127            | -0.000359 |
|                     | 807.3519 |           | 807.3519 | 7  | I   | 11 | 1504.775 |           | 752.8914            | +0.256167 |
|                     | 906.4203 |           | 906.4203 | 8  | V   | 10 | 1391.691 |           | 1391.691            |           |
| +0.243938           | 531.7644 | +0.067539 | 1062.521 | 9  | R   | 9  | 1292.623 |           | 646.8151            | +0.204782 |
| -0.102185           | 595.7937 | -0.002513 | 1190.58  | 10 | Q   | 8  | 1136.522 | -0.03283  | 1136.522            |           |
|                     | 1318.639 | +0.104925 | 1318.639 | 11 | Q   | 7  | 1008.463 |           | 1008.463            |           |
|                     | 1465.707 | +0.238294 | 1465.707 | 12 | F   | 6  | 880.4047 | -0.015956 | 880.4047            |           |
| -0.316664           | 790.8706 |           | 1580.734 | 13 | D   | 5  | 733.3363 |           | 733.3363            |           |
|                     | 1708.793 | +0.22333  | 1708.793 | 14 | Q   | 4  | 618.3093 |           | 618.3093            |           |
| +0.212309           | 904.4341 |           | 1807.861 | 15 | V   | 3  | 490.2508 | +0.066018 | 490.2508            |           |
| +0.167709           | 961.9476 |           | 1922.888 | 16 | D   | 2  | 391.1823 | +0.220858 | 391.1823            |           |
|                     | 2051.93  |           | 2051.93  | 17 | E   | 1  | 276.1554 | +0.000548 | 276.1554            |           |
|                     |          |           |          | 18 | K   | 0  | 147.1128 |           | 147.1128            |           |

Source: 20120314\_VR\_TripleSILAC\_pT1L1T2\_F16  
 Scannumber: 1840  
 Protein: BSU30659; ytzI  
 Peptide Score: 139.78  
 Method: ITMS; CID; 3

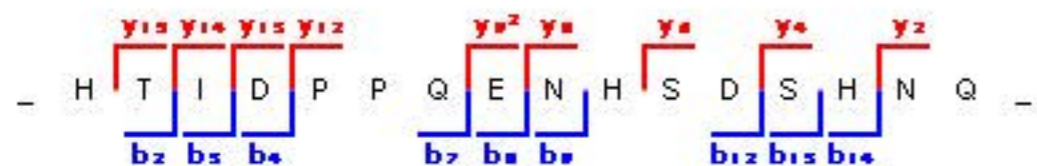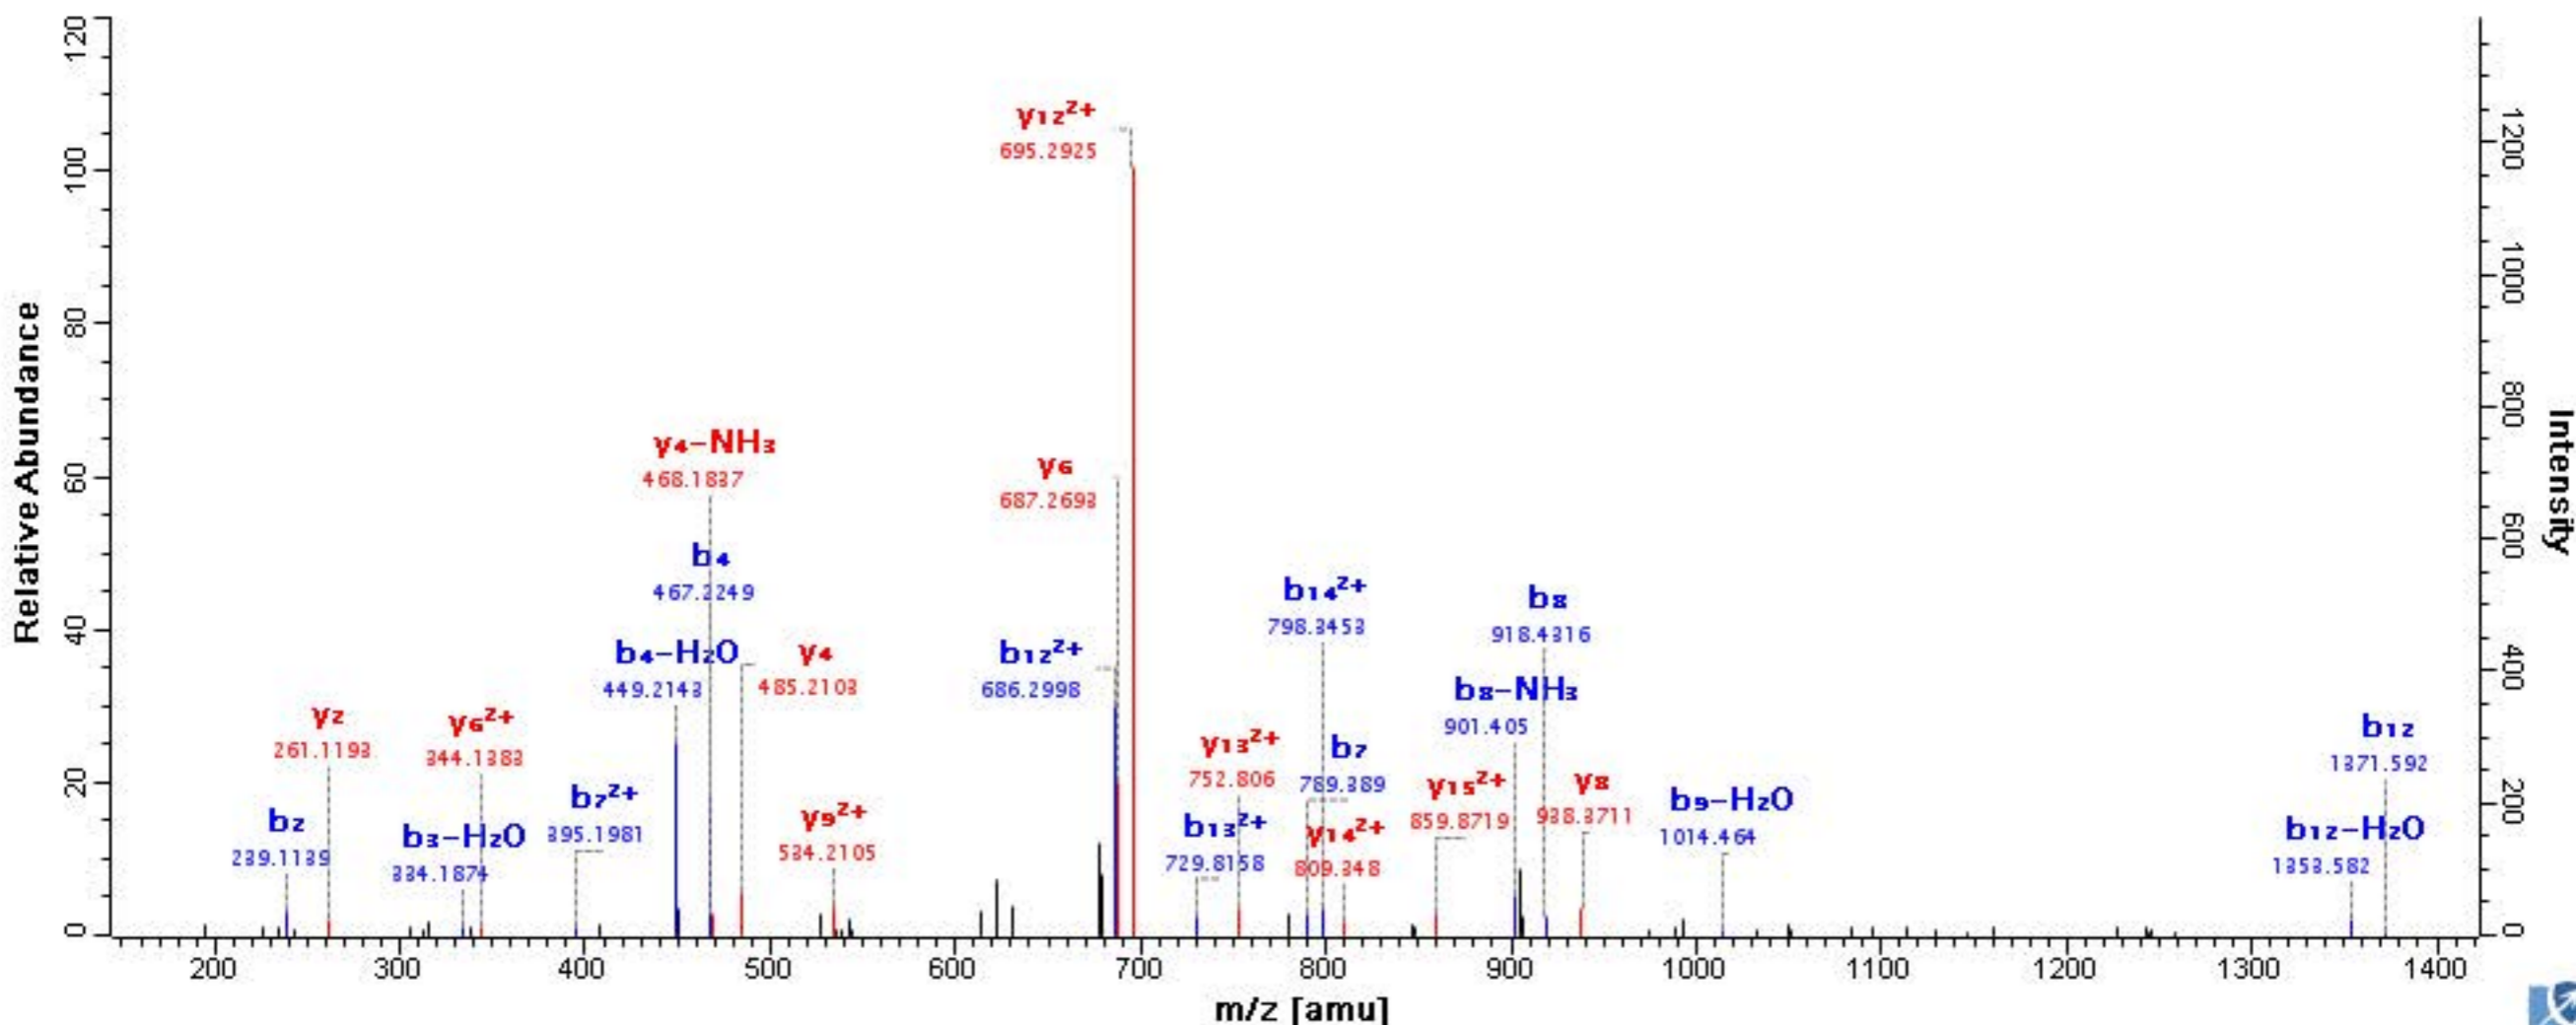

#### precursor information

|                   |                     |
|-------------------|---------------------|
| Mass:             | 1854.78777          |
| m/z:              | System.Collections. |
| Charge:           | System.Collections. |
| Retentiontime:    | System.Collections. |
| Score:            | 139.7806            |
| Mass Error [ppm]: | -0.18772            |
| PEP:              | 2.7457E-10          |
| Precursor Type:   | ISO                 |

#### general information

|                       |           |
|-----------------------|-----------|
| Annotation:           | 12 of 16  |
| AminoAcids Coverag    | 75 %      |
| Intensity Coverage:   | 73 %      |
| Protein Localisation: | 43 ... 58 |

| b <sup>2+</sup> ion |          | b ion     |          |     | y ion |          | y <sup>2+</sup> ion |          |           |
|---------------------|----------|-----------|----------|-----|-------|----------|---------------------|----------|-----------|
| Δ dalton            | mass     | Δ dalton  | mass     | seq |       | Δ dalton | mass                | Δ dalton | mass      |
|                     | 138.0662 |           | 138.0662 | 1   | H     | 15       |                     |          |           |
|                     | 239.1139 | +0.116846 | 239.1139 | 2   | T     | 14       | 1718.736            | 859.8719 | +0.114755 |
|                     | 352.1979 |           | 352.1979 | 3   | I     | 13       | 1617.689            | 809.348  | +0.140791 |
|                     | 467.2249 | -0.0519   | 467.2249 | 4   | D     | 12       | 1504.605            | 752.806  | +0.208824 |
|                     | 564.2776 |           | 564.2776 | 5   | P     | 11       | 1389.578            | 695.2925 | +0.228704 |
|                     | 661.3304 |           | 661.3304 | 6   | P     | 10       | 1292.525            | 1292.525 |           |
| +0.217033           | 395.1981 | +0.086973 | 789.389  | 7   | Q     | 9        | 1195.472            | 1195.472 |           |
|                     | 918.4316 | +0.054756 | 918.4316 | 8   | E     | 8        | 1067.414            | 534.2105 | -0.128452 |
|                     | 1032.474 |           | 1032.474 | 9   | N     | 7        | 938.3711            | 938.3711 |           |
|                     | 1169.533 |           | 1169.533 | 10  | H     | 6        | 824.3282            | 824.3282 |           |
|                     | 1256.565 |           | 1256.565 | 11  | S     | 5        | 687.2693            | 344.1383 | +0.093544 |
| +0.335974           | 686.2998 | +0.376977 | 1371.592 | 12  | D     | 4        | 600.2372            | 600.2372 |           |
| +0.039076           | 729.8158 |           | 1458.624 | 13  | S     | 3        | 485.2103            | 485.2103 |           |
| +0.322791           | 798.3453 |           | 1595.683 | 14  | H     | 2        | 398.1783            | 398.1783 |           |
|                     | 1709.726 |           | 1709.726 | 15  | N     | 1        | 261.1193            | 261.1193 |           |
|                     |          |           |          | 16  | Q     | 0        | 147.0764            | 147.0764 |           |

Source: 20120314\_VR\_TripleSILAC\_pT1L1T2\_F17  
 Scannumber: 1438  
 Protein: BSU36050; cotB  
 Peptide Score: 69.67  
 Method: ITMS; CID; 3

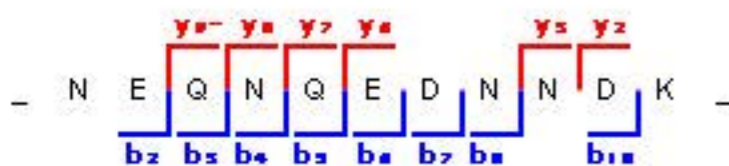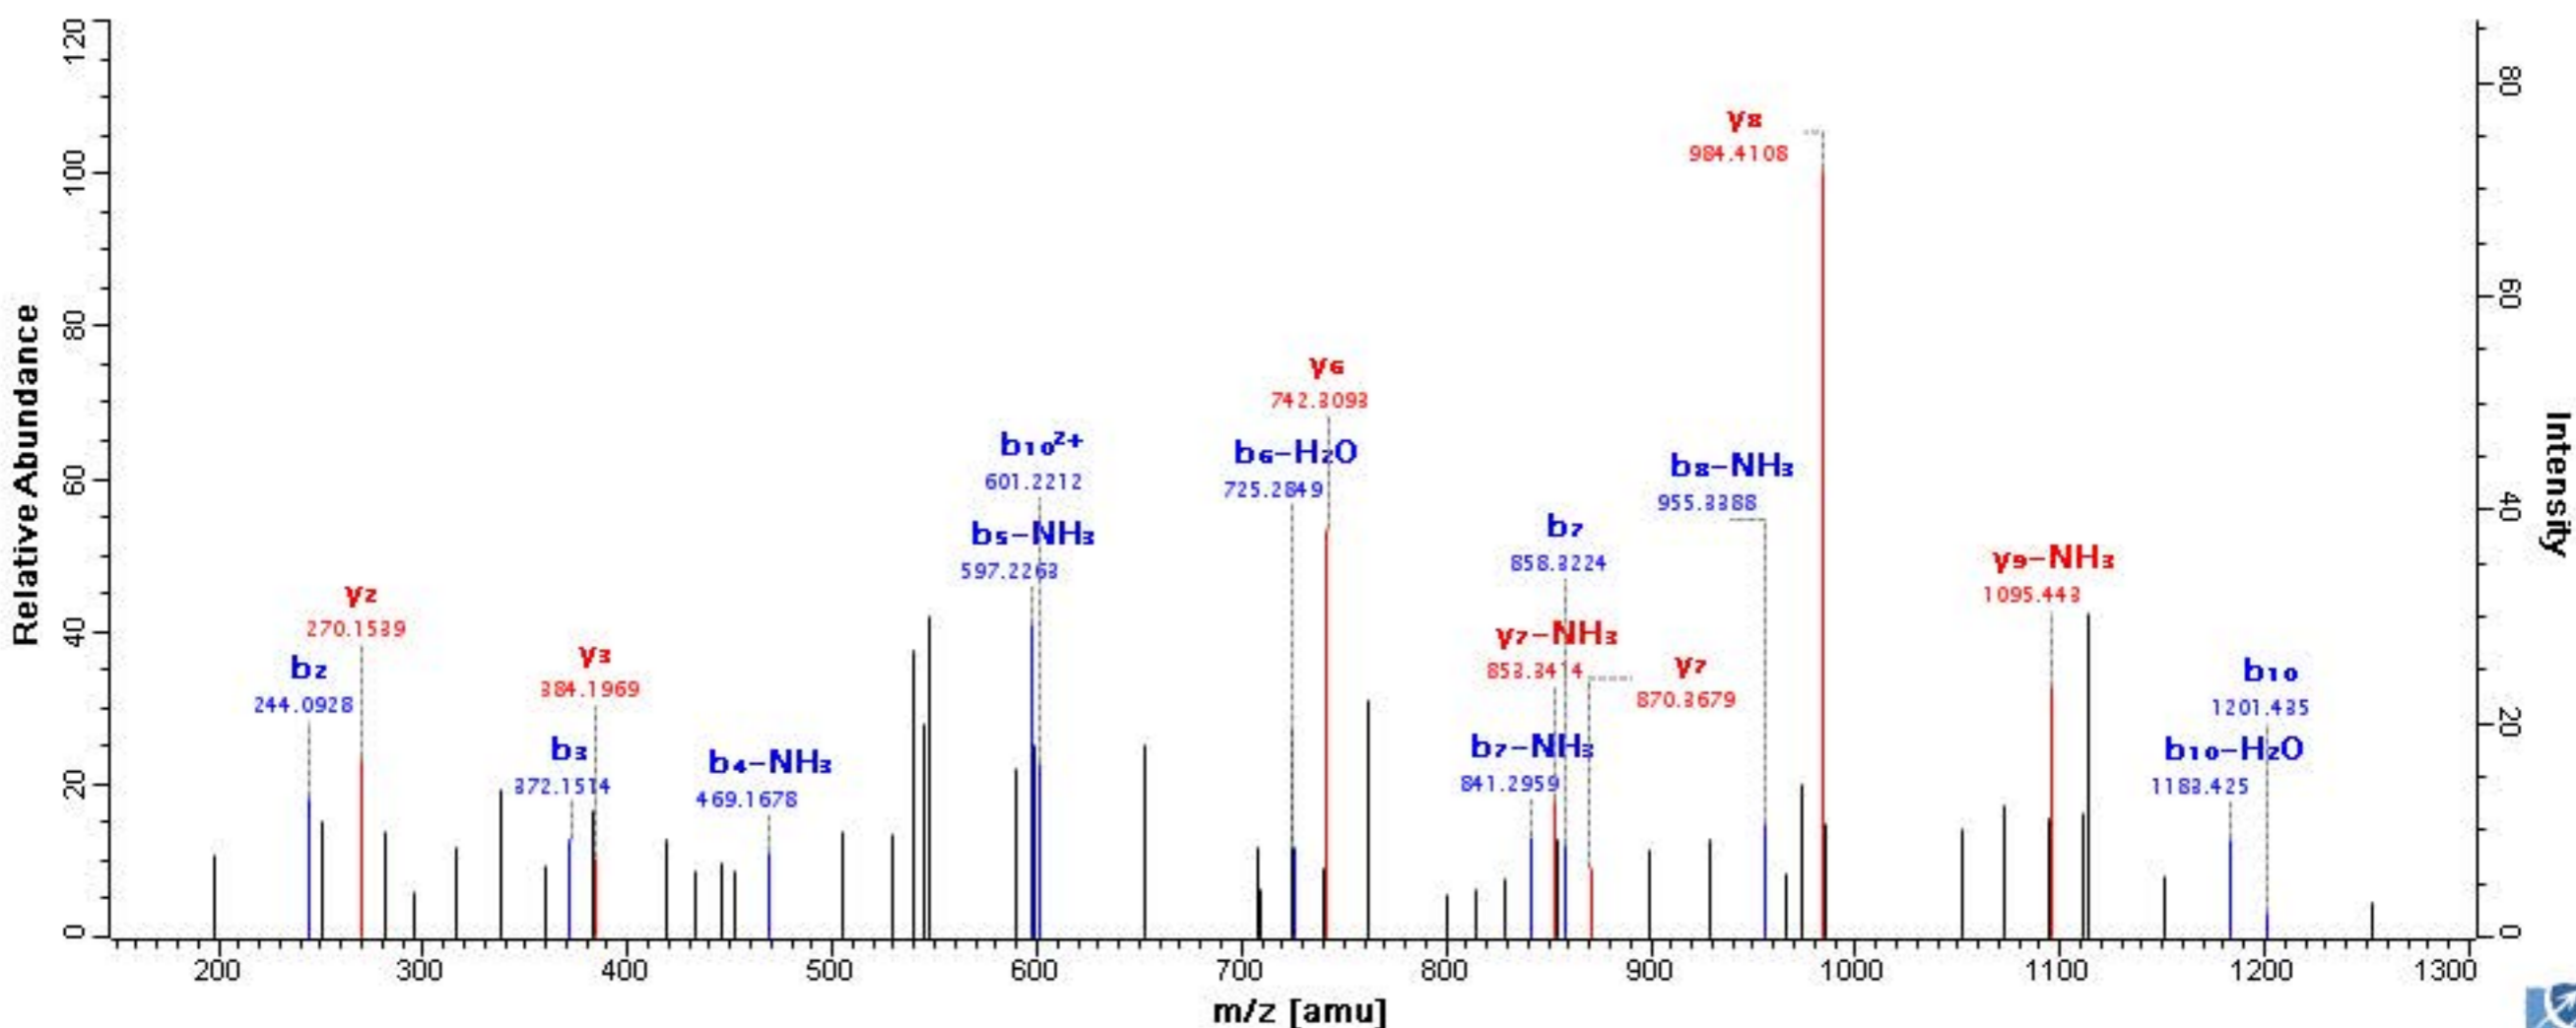

#### precursor information

|                   |                     |
|-------------------|---------------------|
| Mass:             | 1346.53418          |
| m/z:              | System.Collections. |
| Charge:           | System.Collections. |
| Retentiontime:    | System.Collections. |
| Score:            | 69.67165            |
| Mass Error [ppm]: | 0.52577             |
| PEP:              | 0.0043137           |
| Precursor Type:   | MULTI               |

#### general information

|                       |             |
|-----------------------|-------------|
| Annotation:           | 9 of 11     |
| AminoAcids Coverag    | 82 %        |
| Intensity Coverage:   | 39 %        |
| Protein Localisation: | 236 ... 246 |

| b <sup>2+</sup> ion |              | b ion      |              |     | y ion    |              |
|---------------------|--------------|------------|--------------|-----|----------|--------------|
| Δ dalton            | mass         | Δ dalton   | mass         | seq | Δ dalton | mass         |
|                     | 115.05020391 |            | 115.05020391 | 1   |          |              |
|                     | 244.09279701 | +0.1940072 | 244.09279701 | 2   |          | 1241.5120126 |
|                     | 372.15137452 | -0.0916211 | 372.15137452 | 3   |          | 1112.4694195 |
|                     | 486.19430197 |            | 486.19430197 | 4   |          | 984.410842   |
|                     | 614.25287948 |            | 614.25287948 | 5   |          | 870.36791455 |
|                     | 743.29547258 |            | 743.29547258 | 6   |          | 742.30933704 |
|                     | 858.32241561 | +0.017123  | 858.32241561 | 7   |          | 613.26674394 |
|                     | 972.36534306 |            | 972.36534306 | 8   |          | 498.23980091 |
|                     | 1086.4082705 |            | 1086.4082705 | 9   |          | 384.19687346 |
| -0.4302904          | 601.221245   | -0.2206139 | 1201.4352135 | 10  |          | 270.15394602 |
|                     |              |            |              | 11  |          | 155.12700298 |

Source: 20120314\_VR\_TripleSILAC\_pT1L1T2\_F19  
 Scannumber: 3418  
 Protein: BSU35090; yvmA  
 Peptide Score: 130.98  
 Method: ITMS; CID; 3

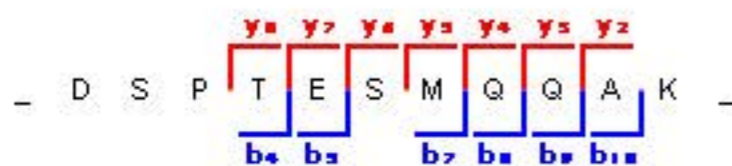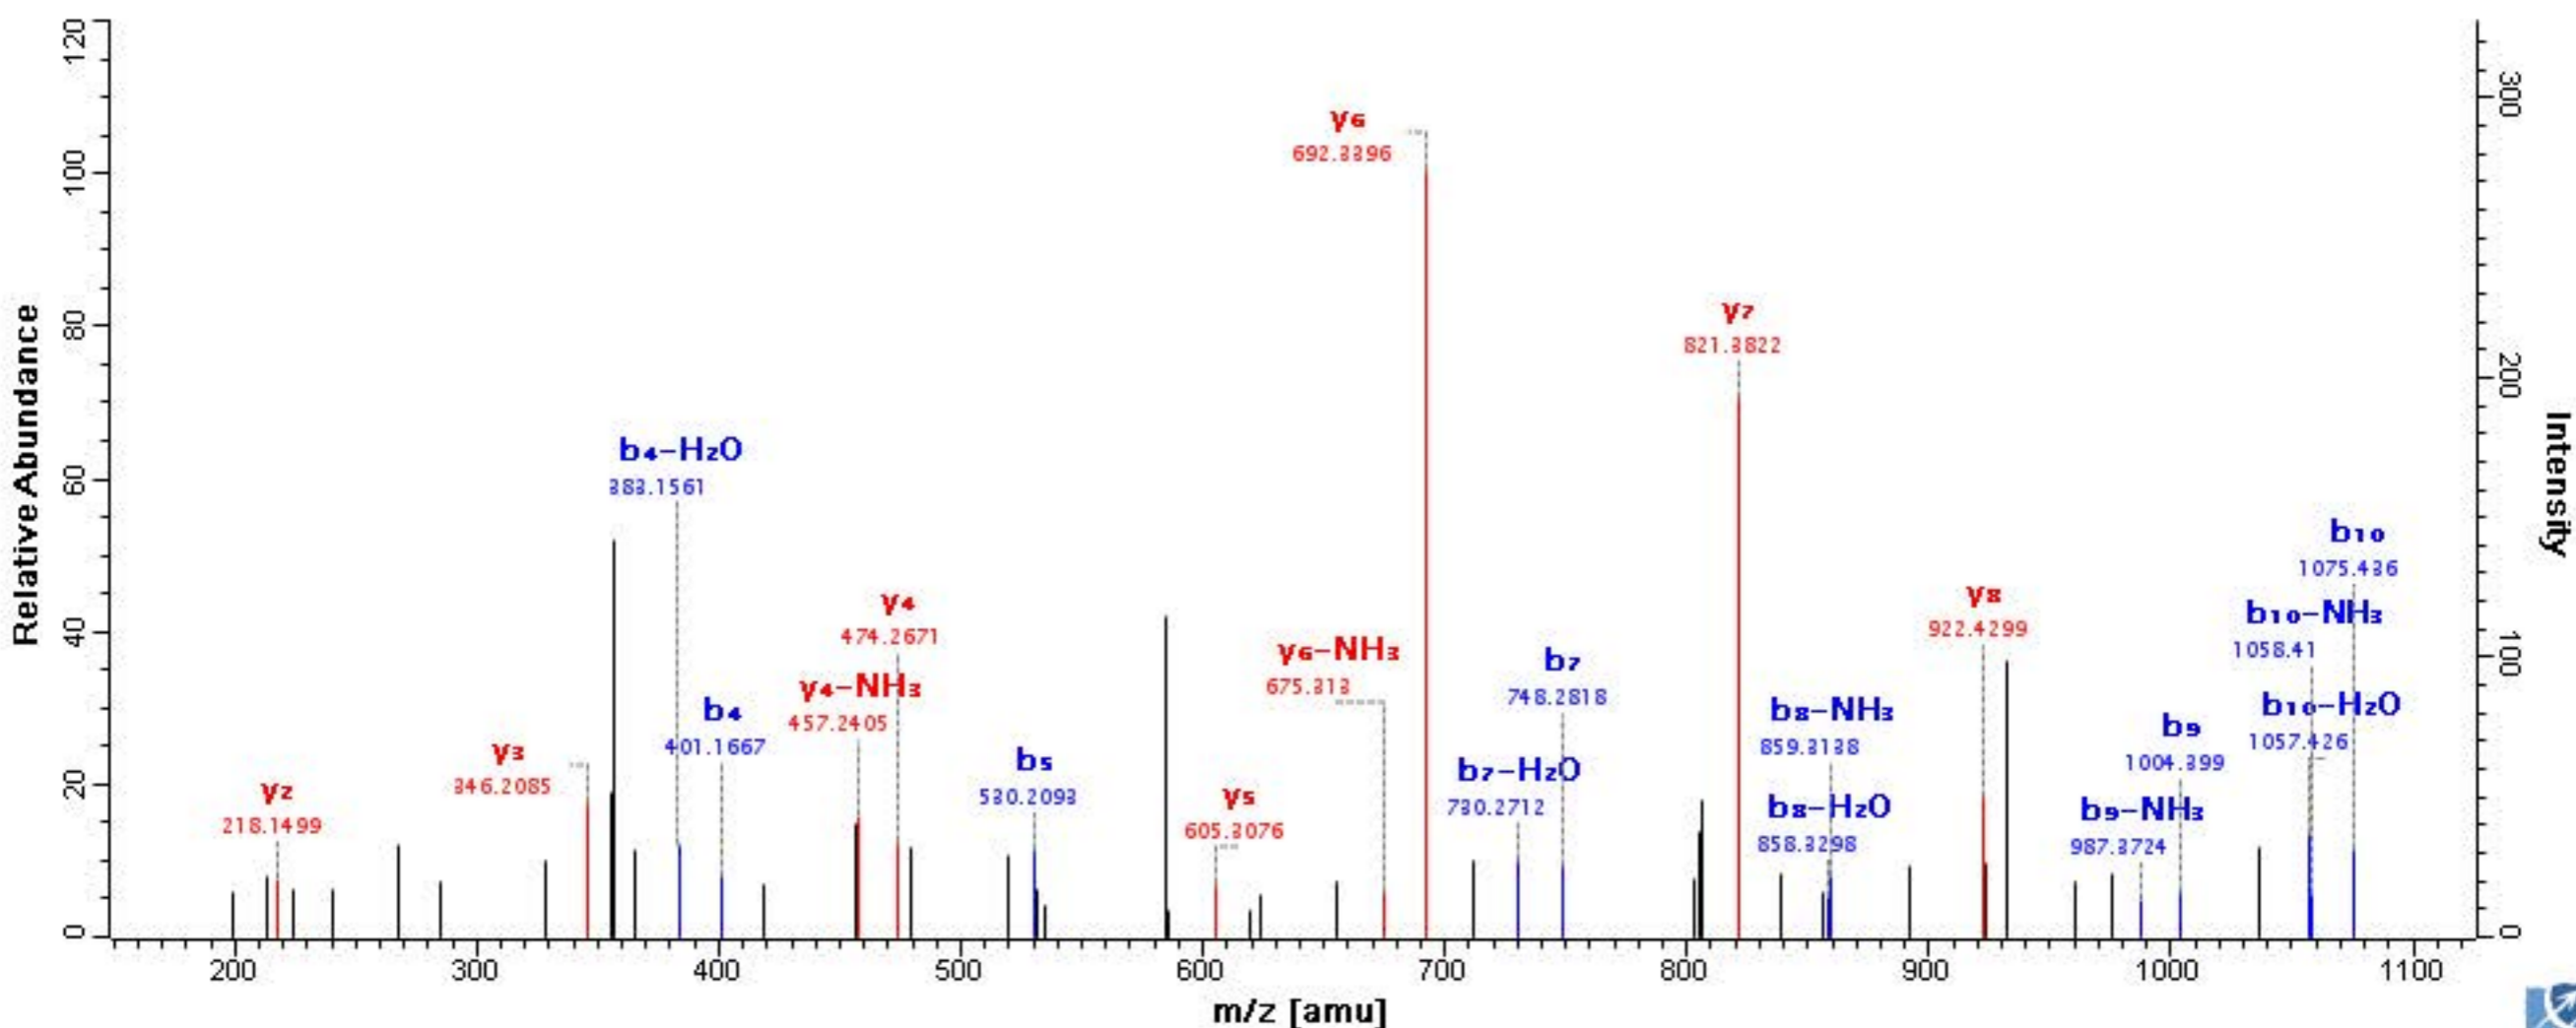

#### precursor information

|                   |                     |
|-------------------|---------------------|
| Mass:             | 1220.53422          |
| m/z:              | System.Collections. |
| Charge:           | System.Collections. |
| Retentiontime:    | System.Collections. |
| Score:            | 130.9825            |
| Mass Error [ppm]: | -0.078546           |
| PEP:              | 7.1202E-09          |
| Precursor Type:   | MULTI               |

#### general information

|                       |             |
|-----------------------|-------------|
| Annotation:           | 7 of 11     |
| AminoAcids Coverage:  | 64 %        |
| Intensity Coverage:   | 47 %        |
| Protein Localisation: | 188 ... 198 |

| b ion      |                |    |     |    |               | y ion      |  |
|------------|----------------|----|-----|----|---------------|------------|--|
| Δ dalton   | mass           |    | seq |    | Δ dalton      | mass       |  |
|            | 116.034219499  | 1  | D   | 10 |               |            |  |
|            | 203.066247908  | 2  | S   | 9  | 1106.51464983 |            |  |
|            | 300.11901176   | 3  | P   | 8  | 1019.48262142 |            |  |
| +0.2588469 | 401.166690235  | 4  | T   | 7  | 922.429857568 | +0.2151009 |  |
| +0.0178285 | 530.209283331  | 5  | E   | 6  | 821.382179094 | -0.020851  |  |
|            | 617.241311741  | 6  | S   | 5  | 692.339585997 | -0.0041368 |  |
| -0.0146455 | 748.281796347  | 7  | M   | 4  | 605.307557587 | +0.1712632 |  |
|            | 876.340373858  | 8  | Q   | 3  | 474.267072981 | +0.0796677 |  |
| -0.1037243 | 1004.39895137  | 9  | Q   | 2  | 346.20849547  | -0.0308832 |  |
| +0.0544134 | 1075.436065158 | 10 | A   | 1  | 218.149917958 | +0.0442349 |  |
|            |                | 11 | K   | 0  | 147.112804171 |            |  |

Source: 20120325\_VR\_Bsu\_TripleSILAC\_pL2ESLRep\_F05  
 Scannumber: 12209  
 Protein: BSU33130; liaI; yvqI  
 Peptide Score: 114.9  
 Method: ITMS; CID; 3

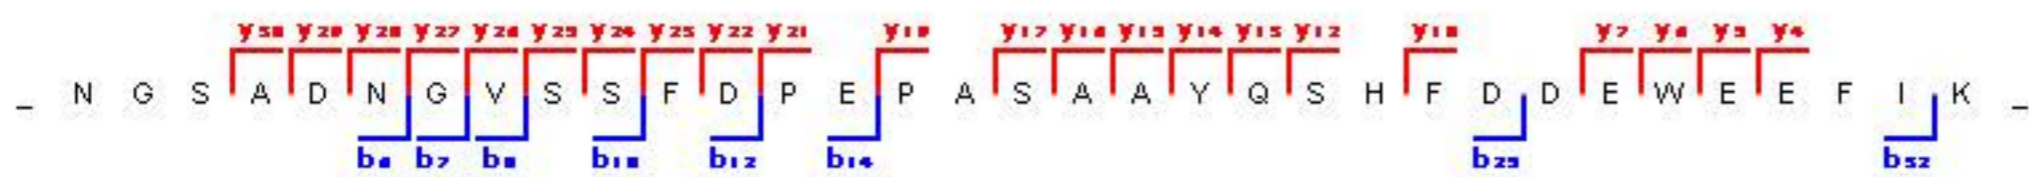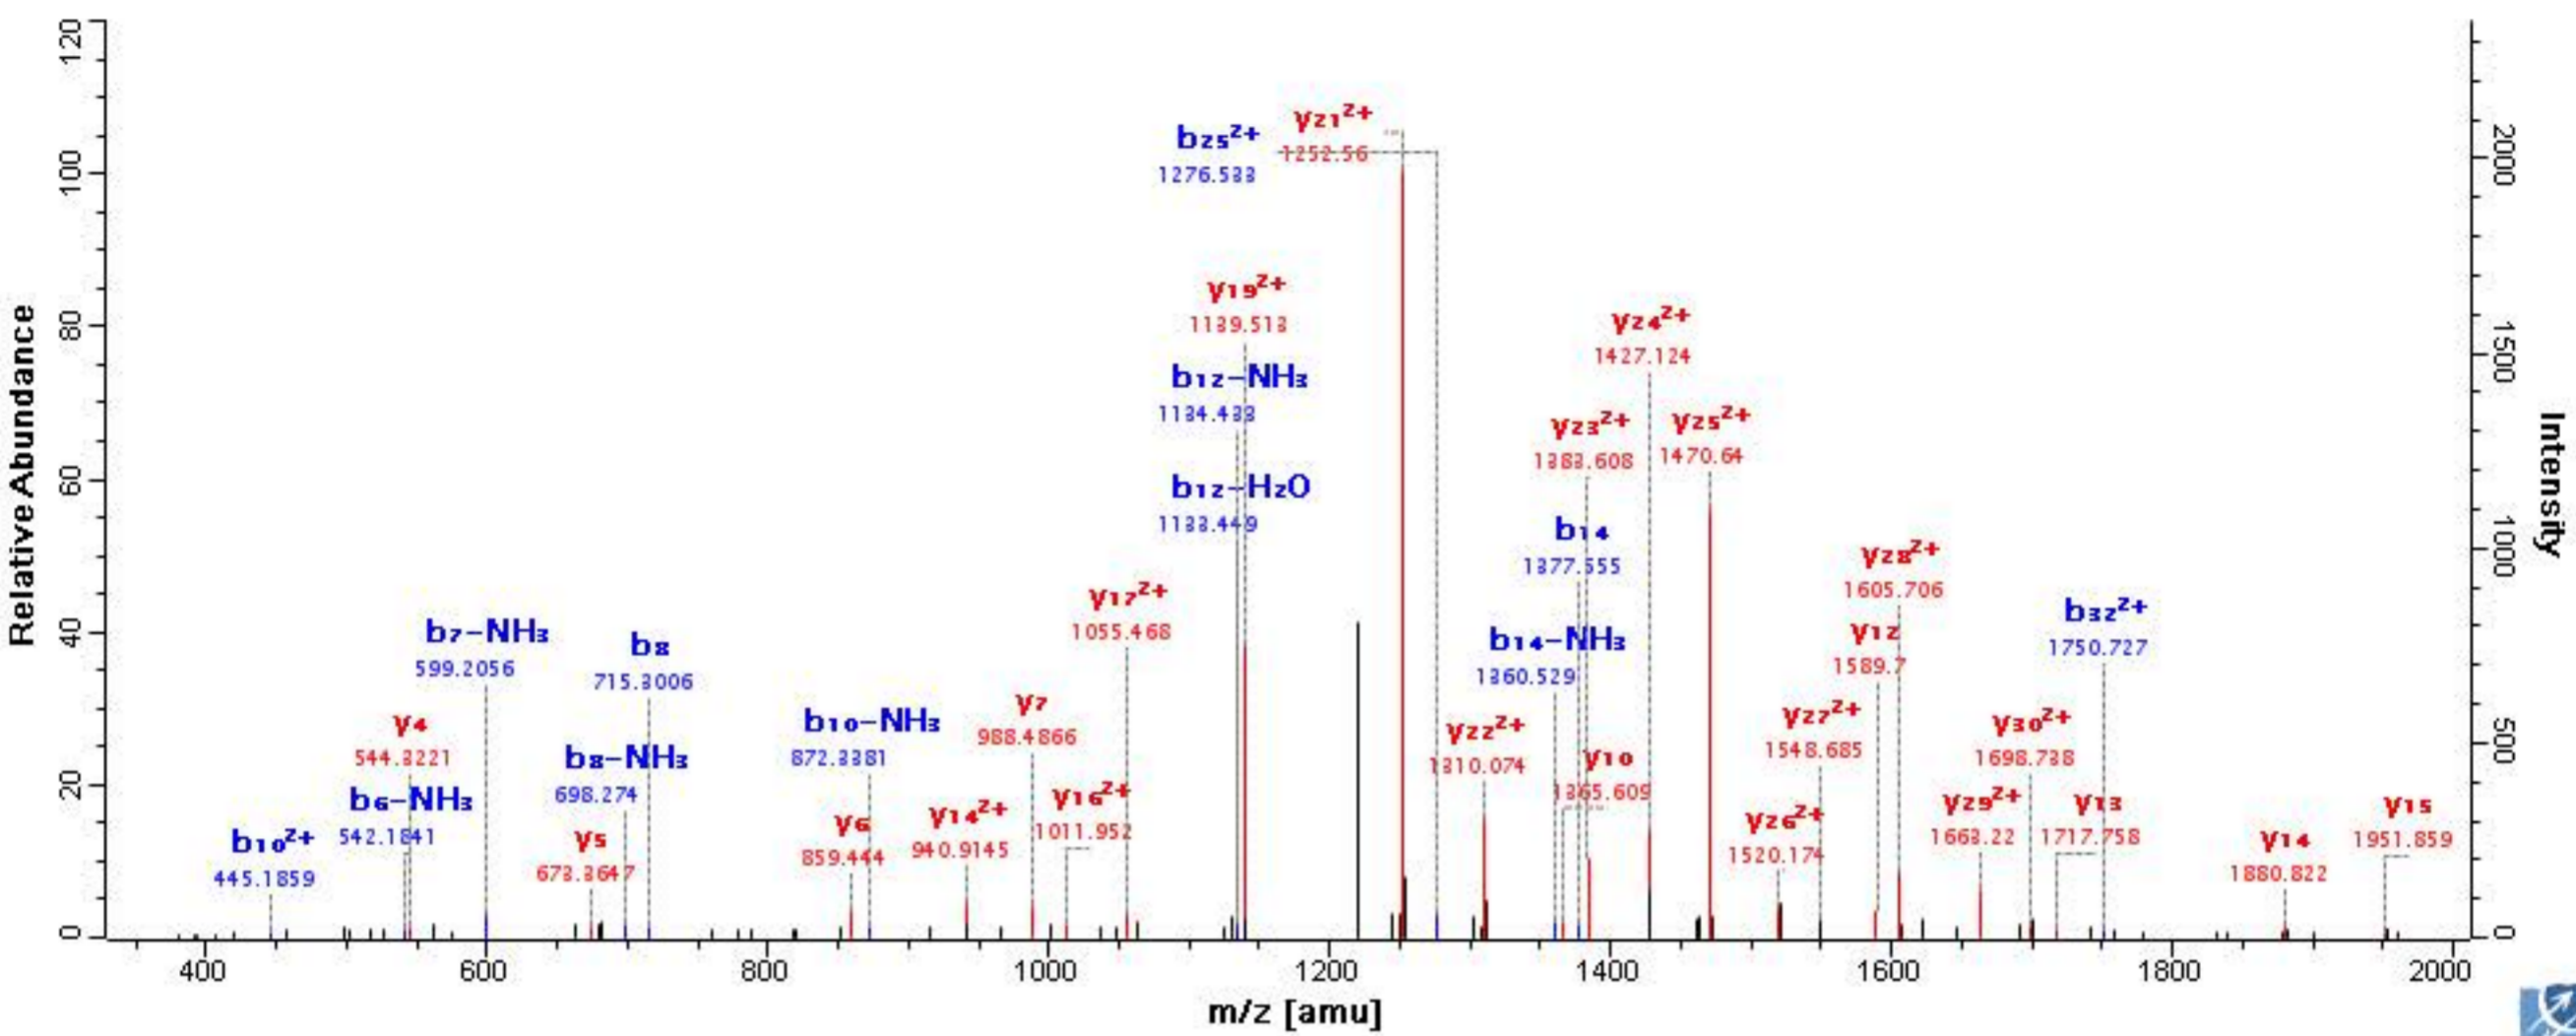

precursor information

|                   |                     |
|-------------------|---------------------|
| Mass:             | 3653.55829          |
| m/z:              | System.Collections. |
| Charge:           | System.Collections. |
| Retentiontime:    | System.Collections. |
| Score:            | 114.8969            |
| Mass Error [ppm]: | -0.094004           |
| PEP:              | 2.1877E-27          |
| Precursor Type:   | ISO                 |

| b <sup>2+</sup> ion |          | b ion     |          | seq |   |    | y ion    |           | y <sup>2+</sup> ion |           |
|---------------------|----------|-----------|----------|-----|---|----|----------|-----------|---------------------|-----------|
| Δ dalton            | mass     | Δ dalton  | mass     |     |   |    | Δ dalton | mass      | Δ dalton            | mass      |
|                     | 115.0502 |           | 115.0502 | 1   | N | 32 |          |           |                     |           |
|                     | 172.0717 |           | 172.0717 | 2   | G | 31 | 3540.523 |           | 3540.523            |           |
|                     | 259.1037 |           | 259.1037 | 3   | S | 30 | 3483.502 |           | 3483.502            |           |
|                     | 330.1408 |           | 330.1408 | 4   | A | 29 | 3396.469 |           | 1698.738            | +0.139915 |
|                     | 445.1678 |           | 445.1678 | 5   | D | 28 | 3325.432 |           | 1663.22             | +0.334253 |
|                     | 559.2107 |           | 559.2107 | 6   | N | 27 | 3210.405 |           | 1605.706            | -0.016167 |
|                     | 616.2321 |           | 616.2321 | 7   | G | 26 | 3096.363 |           | 1548.685            | +0.204637 |
|                     | 715.3006 | +0.264872 | 715.3006 | 8   | V | 25 | 3039.341 |           | 1520.174            | +0.038245 |
|                     | 802.3326 |           | 802.3326 | 9   | S | 24 | 2940.273 |           | 1470.64             | +0.289005 |
| +0.044523           | 445.1859 |           | 889.3646 | 10  | S | 23 | 2853.241 |           | 1427.124            | -0.027867 |
|                     | 1036.433 |           | 1036.433 | 11  | F | 22 | 2766.209 |           | 1383.608            | +0.331409 |
|                     | 1151.46  |           | 1151.46  | 12  | D | 21 | 2619.14  |           | 1310.074            | +0.270035 |
|                     | 1248.513 |           | 1248.513 | 13  | P | 20 | 2504.113 |           | 1252.56             | +0.298155 |
|                     | 1377.555 | +0.062469 | 1377.555 | 14  | E | 19 | 2407.06  |           | 2407.06             |           |
|                     | 1474.608 |           | 1474.608 | 15  | P | 18 | 2278.018 |           | 1139.513            | +0.182992 |
|                     | 1545.645 |           | 1545.645 | 16  | A | 17 | 2180.965 |           | 2180.965            |           |
|                     | 1632.677 |           | 1632.677 | 17  | S | 16 | 2109.928 |           | 1055.468            | -0.032079 |
|                     | 1703.714 |           | 1703.714 | 18  | A | 15 | 2022.896 |           | 1011.952            | +0.045214 |
|                     | 1774.751 |           | 1774.751 | 19  | A | 14 | 1951.859 | +0.08123  | 1951.859            |           |
|                     | 1937.815 |           | 1937.815 | 20  | Y | 13 | 1880.822 | +0.314389 | 940.9145            | +0.181449 |
|                     | 2065.873 |           | 2065.873 | 21  | Q | 12 | 1717.758 | +0.352083 | 1717.758            |           |
|                     | 2152.905 |           | 2152.905 | 22  | S | 11 | 1589.7   | -0.164535 | 1589.7              |           |
|                     | 2289.964 |           | 2289.964 | 23  | H | 10 | 1502.668 |           | 1502.668            |           |
|                     | 2437.033 |           | 2437.033 | 24  | F | 9  | 1365.609 | +0.08705  | 1365.609            |           |
| +0.317115           | 1276.533 |           | 2552.06  | 25  | D | 8  | 1218.54  |           | 1218.54             |           |
|                     | 2667.087 |           | 2667.087 | 26  | D | 7  | 1103.514 |           | 1103.514            |           |
|                     | 2796.129 |           | 2796.129 | 27  | E | 6  | 988.4866 | -0.087525 | 988.4866            |           |
|                     | 2982.209 |           | 2982.209 | 28  | W | 5  | 859.444  | -0.005259 | 859.444             |           |
|                     | 3111.251 |           | 3111.251 | 29  | E | 4  | 673.3647 | +0.013507 | 673.3647            |           |
|                     | 3240.294 |           | 3240.294 | 30  | E | 3  | 544.3221 | -0.007255 | 544.3221            |           |
|                     | 3387.362 |           | 3387.362 | 31  | F | 2  | 415.2795 |           | 415.2795            |           |
| +0.077105           | 1750.727 |           | 3500.446 | 32  | I | 1  | 268.2111 |           | 268.2111            |           |
|                     |          |           |          | 33  | K | 0  | 155.127  |           | 155.127             |           |

general information

|                       |            |
|-----------------------|------------|
| Annotation:           | 25 of 33   |
| AminoAcids Coverage:  | 76 %       |
| Intensity Coverage:   | 68 %       |
| Protein Localisation: | 92 ... 124 |

Source: 20120325\_VR\_Bsu\_TripleSILAC\_pL2ESLSrep\_FD6  
 Scannumber: 5658  
 Protein: BSU11900; yjcL  
 Peptide Score: 87.5  
 Method: ITMS; CID; 3

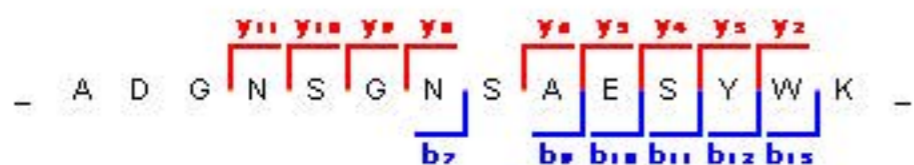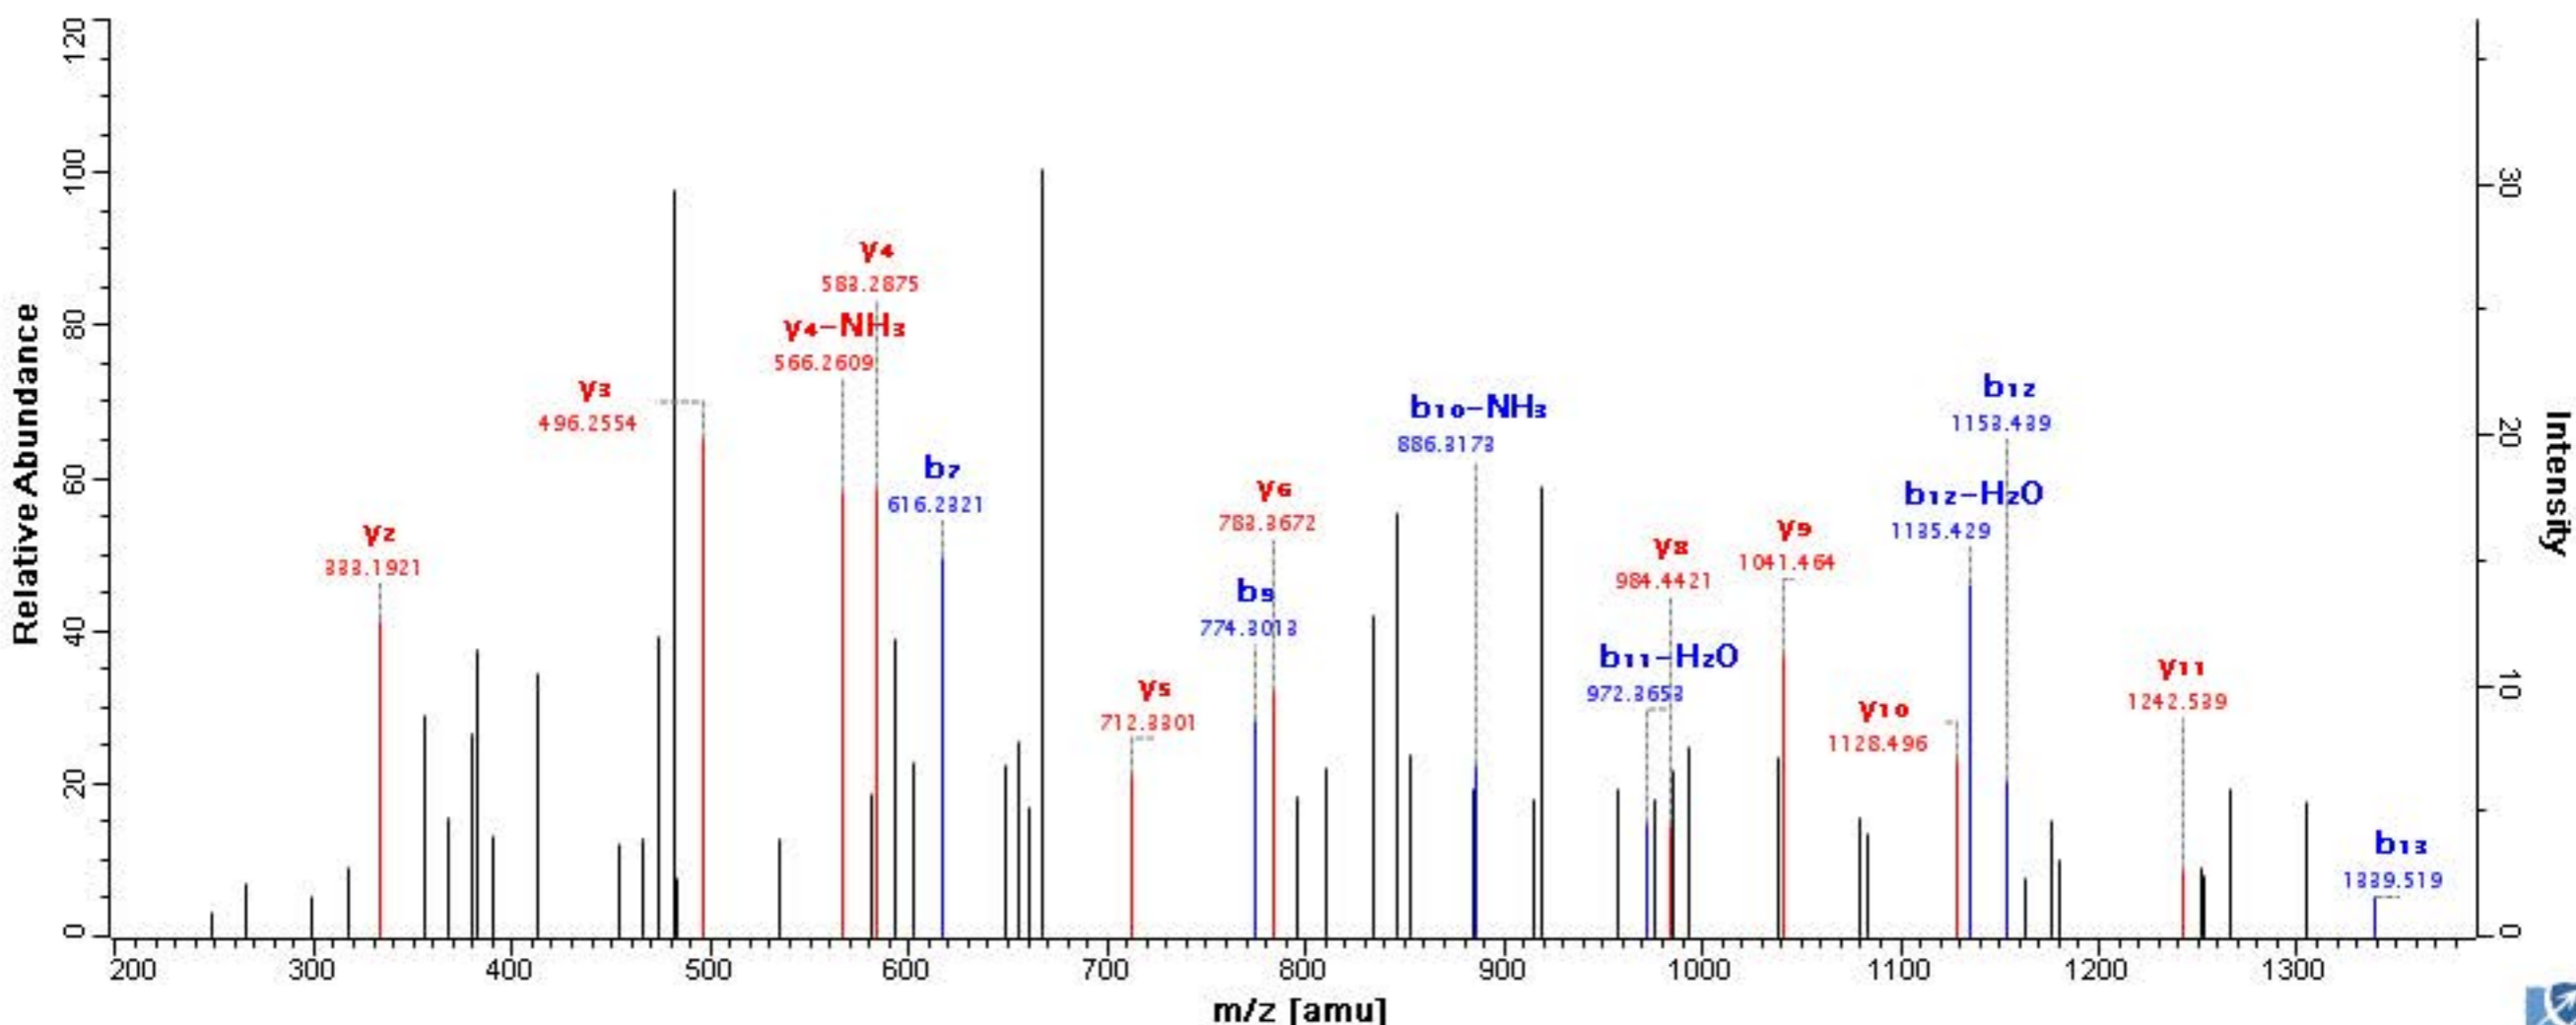

**precursor information**

|                   |                     |
|-------------------|---------------------|
| Mass:             | 1484.61705          |
| m/z:              | System.Collections. |
| Charge:           | System.Collections. |
| Retentiontime:    | System.Collections. |
| Score:            | 87.4985             |
| Mass Error [ppm]: | 0.16536             |
| PEP:              | 0.013591            |
| Precursor Type:   | ISO                 |

**general information**

|                       |             |
|-----------------------|-------------|
| Annotation:           | 9 of 14     |
| AminoAcids Coverage:  | 64 %        |
| Intensity Coverage:   | 33 %        |
| Protein Localisation: | 196 ... 209 |

| b ion      |                |    |     |    | y ion          |            |  |  |  |
|------------|----------------|----|-----|----|----------------|------------|--|--|--|
| Δ dalton   | mass           |    | seq |    | Δ dalton       | mass       |  |  |  |
|            | 72.044390254   | 1  | A   | 13 |                |            |  |  |  |
|            | 187.071333286  | 2  | D   | 12 | 1414.58696315  |            |  |  |  |
|            | 244.09279701   | 3  | G   | 11 | 1299.560020118 |            |  |  |  |
|            | 358.135724457  | 4  | N   | 10 | 1242.538556394 | +0.302386  |  |  |  |
|            | 445.167752867  | 5  | S   | 9  | 1128.495628947 | -0.1966788 |  |  |  |
|            | 502.189216591  | 6  | G   | 8  | 1041.463600537 | +0.0984112 |  |  |  |
| +0.0291475 | 616.232144038  | 7  | N   | 7  | 984.442136813  | -0.0210553 |  |  |  |
|            | 703.264172448  | 8  | S   | 6  | 870.399209366  |            |  |  |  |
| +0.0524125 | 774.301286236  | 9  | A   | 5  | 783.367180956  | +0.226447  |  |  |  |
|            | 903.343879332  | 10 | E   | 4  | 712.330067168  | +0.2018542 |  |  |  |
|            | 990.375907742  | 11 | S   | 3  | 583.287474072  | -0.0036606 |  |  |  |
| +0.1258272 | 1153.43923628  | 12 | Y   | 2  | 496.255445662  | -0.0845472 |  |  |  |
| +0.0614068 | 1339.518549234 | 13 | W   | 1  | 333.192117124  | +0.0892549 |  |  |  |
|            |                | 14 | K   | 0  | 147.112804171  |            |  |  |  |

Source: 20120325\_VR\_Bsu\_TripleSILAC\_pL2ESLrep\_F07  
 Scannumber: 10935  
 Protein: BSU23460; spoIIAB  
 Peptide Score: 70.34  
 Method: ITMS; CID; 3

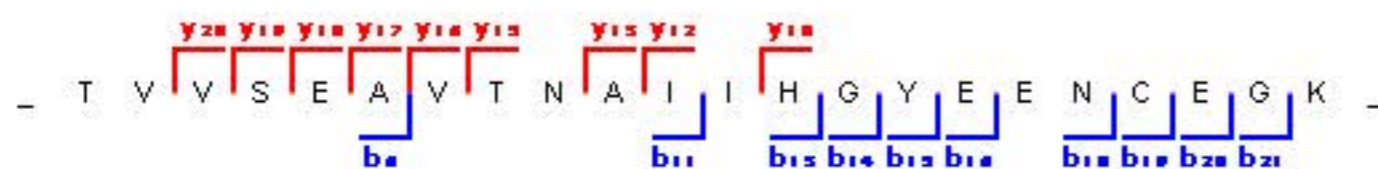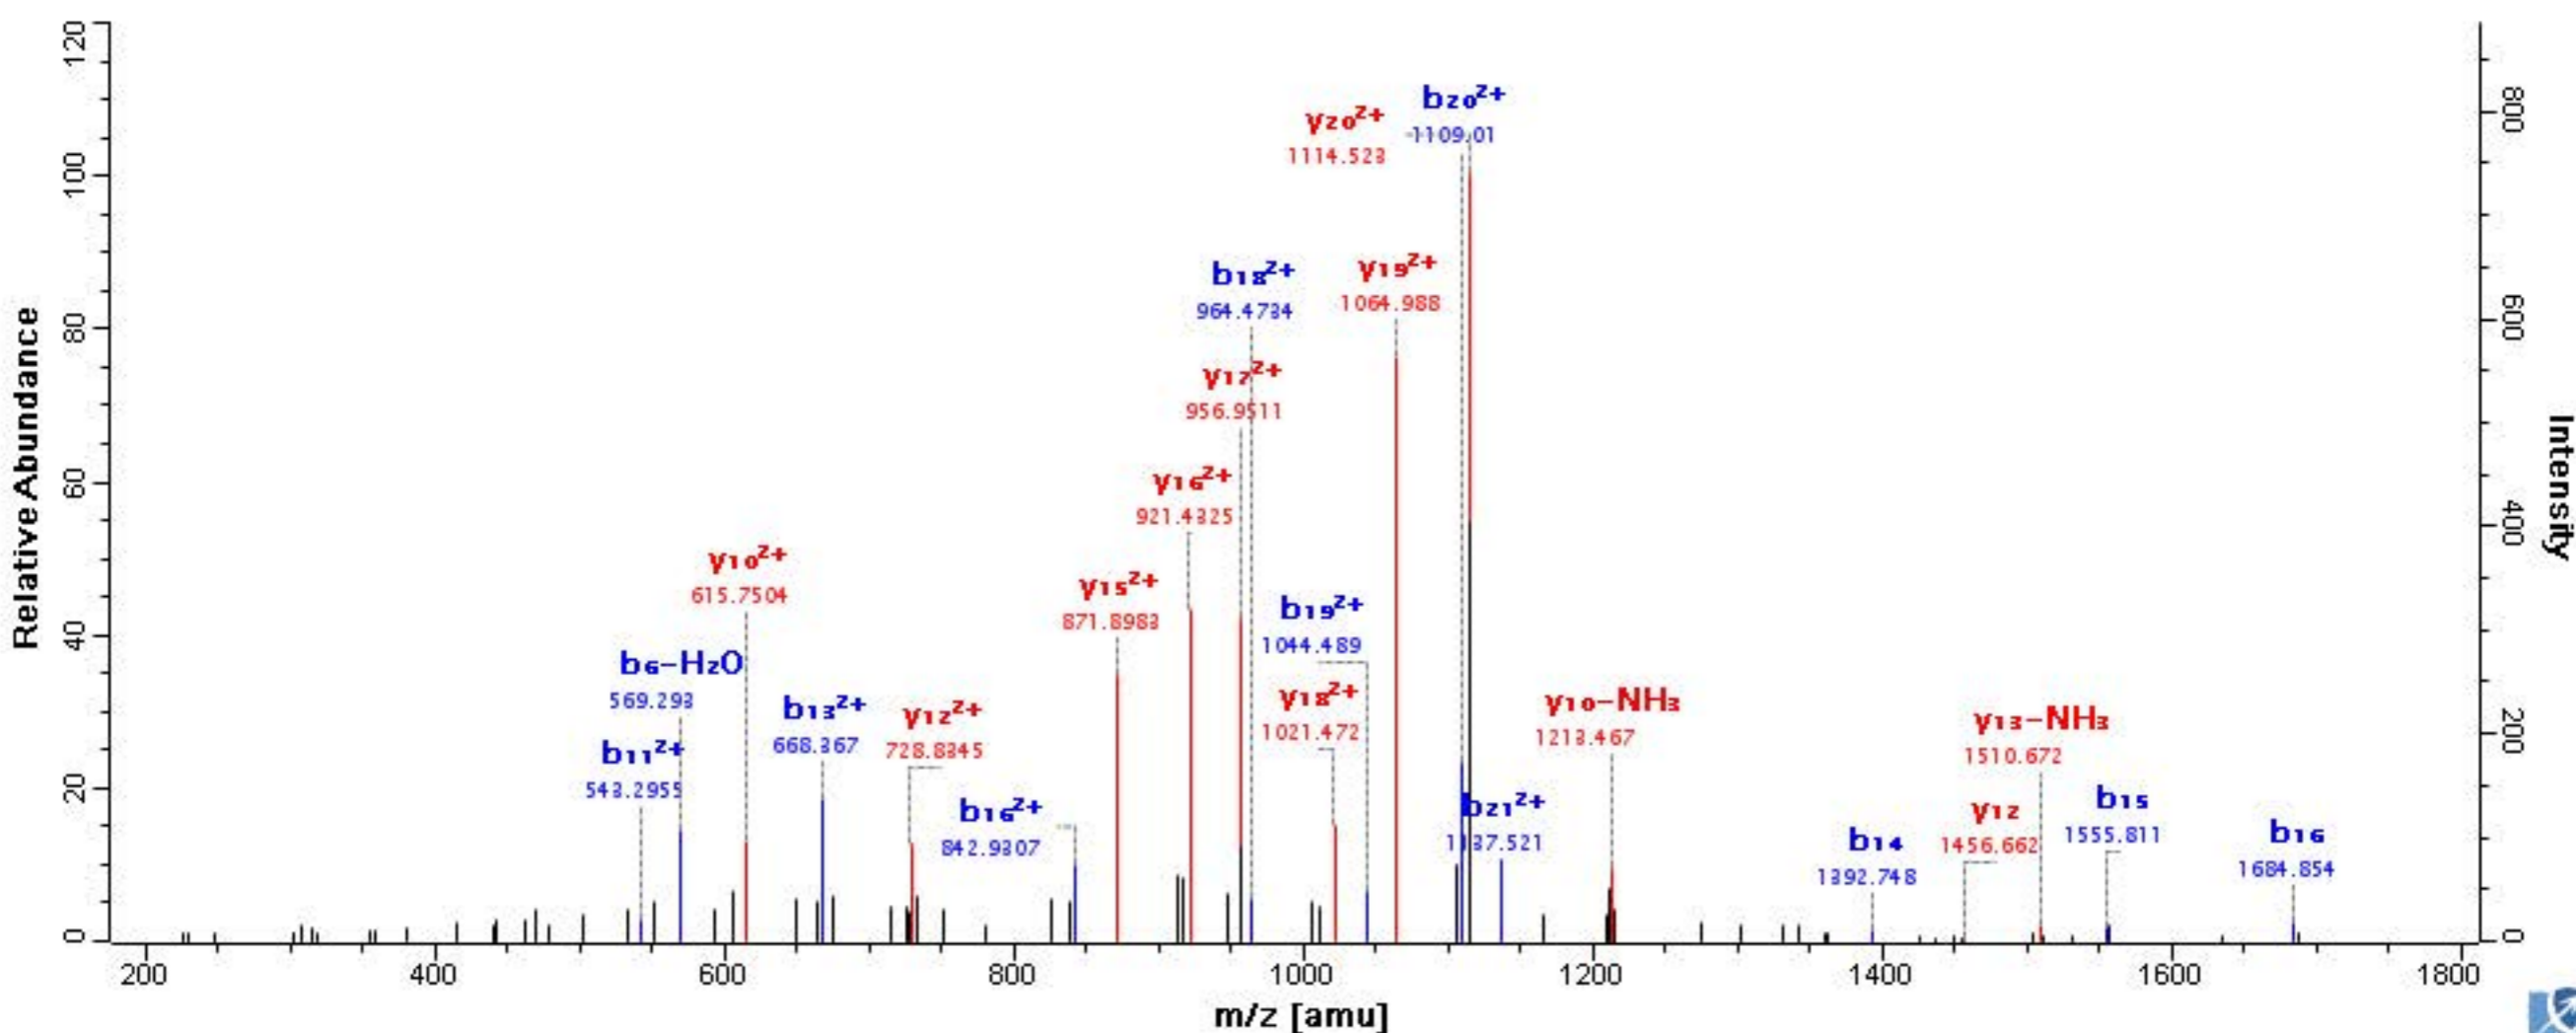

#### precursor information

|                   |                     |
|-------------------|---------------------|
| Mass:             | 2427.14526          |
| m/z:              | System.Collections. |
| Charge:           | System.Collections. |
| Retentiontime:    | System.Collections. |
| Score:            | 70.33514            |
| Mass Error [ppm]: | -0.61358            |
| PEP:              | 0.0069702           |
| Precursor Type:   | ISO                 |

| b <sup>2+</sup> ion |          | b ion     |          |     | gamma ion |          | gamma <sup>2+</sup> ion |           |                    |
|---------------------|----------|-----------|----------|-----|-----------|----------|-------------------------|-----------|--------------------|
| Δ dalton            | mass     | Δ dalton  | mass     | seq |           | Δ dalton | mass                    | Δ dalton  | mass               |
|                     | 102.055  |           | 102.055  | 1   | T         | 21       |                         |           |                    |
|                     | 201.1234 |           | 201.1234 | 2   | V         | 20       | 2327.106                |           | 2327.106           |
|                     | 300.1918 |           | 300.1918 | 3   | V         | 19       | 2228.038                |           | 1114.523 +0.013282 |
|                     | 387.2238 |           | 387.2238 | 4   | S         | 18       | 2128.97                 |           | 1064.988 +0.193729 |
|                     | 516.2664 |           | 516.2664 | 5   | E         | 17       | 2041.937                |           | 1021.472 +0.323757 |
|                     | 587.3035 |           | 587.3035 | 6   | A         | 16       | 1912.895                |           | 956.9511 +0.018699 |
|                     | 686.3719 |           | 686.3719 | 7   | V         | 15       | 1841.858                |           | 921.4325 +0.278345 |
|                     | 787.4196 |           | 787.4196 | 8   | T         | 14       | 1742.789                |           | 871.8983 +0.109304 |
|                     | 901.4625 |           | 901.4625 | 9   | N         | 13       | 1641.742                |           | 1641.742           |
|                     | 972.4997 |           | 972.4997 | 10  | A         | 12       | 1527.699                |           | 1527.699           |
| -0.246851           | 543.2955 |           | 1085.584 | 11  | I         | 11       | 1456.662                | +0.206144 | 728.8345 +0.177559 |
|                     | 1198.668 |           | 1198.668 | 12  | I         | 10       | 1343.578                |           | 1343.578           |
| +0.170492           | 668.367  |           | 1335.727 | 13  | H         | 9        | 1230.494                |           | 615.7504 -0.047581 |
|                     | 1392.748 | +0.029555 | 1392.748 | 14  | G         | 8        | 1093.435                |           | 1093.435           |
|                     | 1555.811 | +0.336588 | 1555.811 | 15  | Y         | 7        | 1036.413                |           | 1036.413           |
| -0.09596            | 842.9307 | -0.009594 | 1684.854 | 16  | E         | 6        | 873.3498                |           | 873.3498           |
|                     | 1813.897 |           | 1813.897 | 17  | E         | 5        | 744.3072                |           | 744.3072           |
| +0.354139           | 964.4734 |           | 1927.94  | 18  | N         | 4        | 615.2646                |           | 615.2646           |
| -0.00048            | 1044.489 |           | 2087.97  | 19  | C         | 3        | 501.2217                |           | 501.2217           |
| +0.195631           | 1109.01  |           | 2217.013 | 20  | E         | 2        | 341.1911                |           | 341.1911           |
| -0.040565           | 1137.521 |           | 2274.034 | 21  | G         | 1        | 212.1485                |           | 212.1485           |
|                     |          |           |          | 22  | K         | 0        | 155.127                 |           | 155.127            |

#### general information

|                       |           |
|-----------------------|-----------|
| Annotation:           | 16 of 22  |
| AminoAcids Coverag    | 73 %      |
| Intensity Coverage:   | 63 %      |
| Protein Localisation: | 42 ... 63 |



Source: 20120325\_VR\_Bsu\_TripleSILAC\_pL2ESLRep\_F12  
 Scannumber: 3023  
 Protein: BSU15320; sigE; spoIIGB  
 Peptide Score: 94.85  
 Method: ITMS; CID; 3

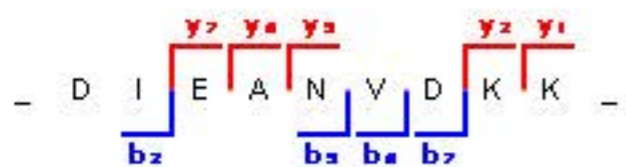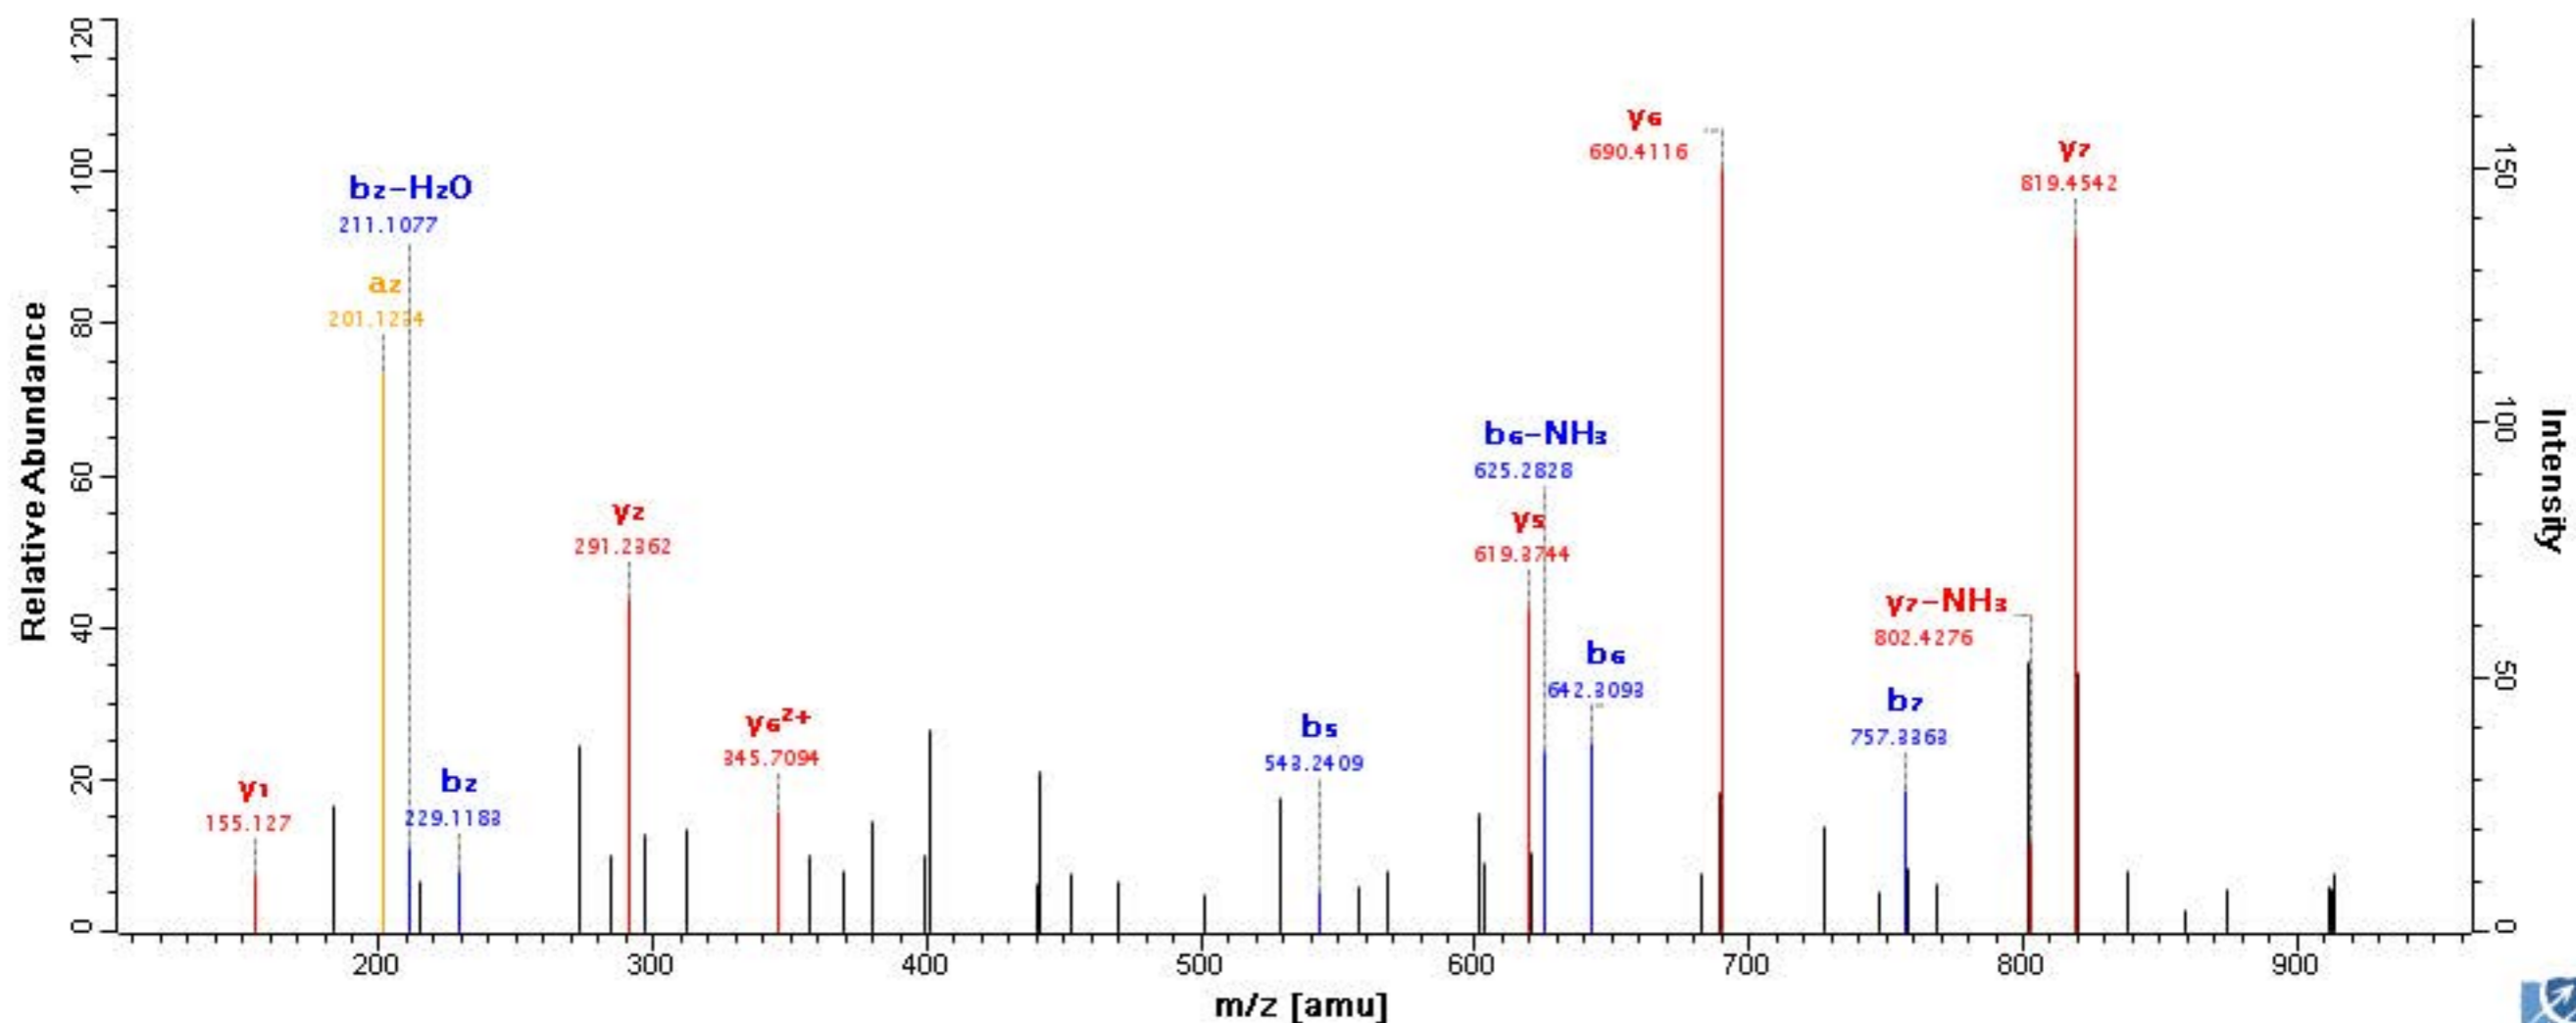

### precursor information

|                       |                     |
|-----------------------|---------------------|
| Mass:                 | 1030.52929          |
| m/z:                  | System.Collections. |
| Charge:               | System.Collections. |
| Retentiontime:        | System.Collections. |
| Score:                | 94.84981            |
| Mass Error [ppm]:     | -0.18665            |
| PEP:                  | 0.0018395           |
| g Precursor Type:     | MULTI               |
| Annotation:           | 8 of 9              |
| AminoAcids Coverag    | 89 %                |
| Intensity Coverage:   | 53 %                |
| Protein Localisation: | 167 ... 175         |

| a ion    |          | b ion     |          | seq |   |   | y ion    |           | y <sup>2+</sup> ion |           |
|----------|----------|-----------|----------|-----|---|---|----------|-----------|---------------------|-----------|
| Δ dalton | mass     | Δ dalton  | mass     |     |   |   | Δ dalton | mass      | Δ dalton            | mass      |
|          | 88.0393  |           | 116.0342 | 1   | D | 8 |          |           |                     |           |
| +0.04492 | 201.1234 | -0.009076 | 229.1183 | 2   | I | 7 | 932.5382 |           | 932.5382            |           |
|          | 330.166  |           | 358.1609 | 3   | E | 6 | 819.4542 | -0.00451  | 819.4542            |           |
|          | 401.2031 |           | 429.198  | 4   | A | 5 | 690.4116 | +0.058347 | 345.7094            | +0.025627 |
|          | 515.246  | +0.04198  | 543.2409 | 5   | N | 4 | 619.3744 | -0.064574 | 619.3744            |           |
|          | 614.3144 | +0.0003   | 642.3093 | 6   | V | 3 | 505.3315 |           | 505.3315            |           |
|          | 729.3414 | +0.052092 | 757.3363 | 7   | D | 2 | 406.2631 |           | 406.2631            |           |
|          | 865.4505 |           | 893.4454 | 8   | K | 1 | 291.2362 | -0.089986 | 291.2362            |           |
|          |          |           |          | 9   | K | 0 | 155.127  | -0.093052 | 155.127             |           |

Source: 20120325\_VR\_Bsu\_TripleSILAC\_pL2ESLRep\_F12  
 Scannumber: 3955  
 Protein: BSU05820; gmuA; ydhN  
 Peptide Score: 135.43  
 Method: ITMS; CID; 3

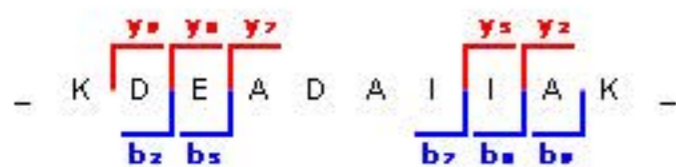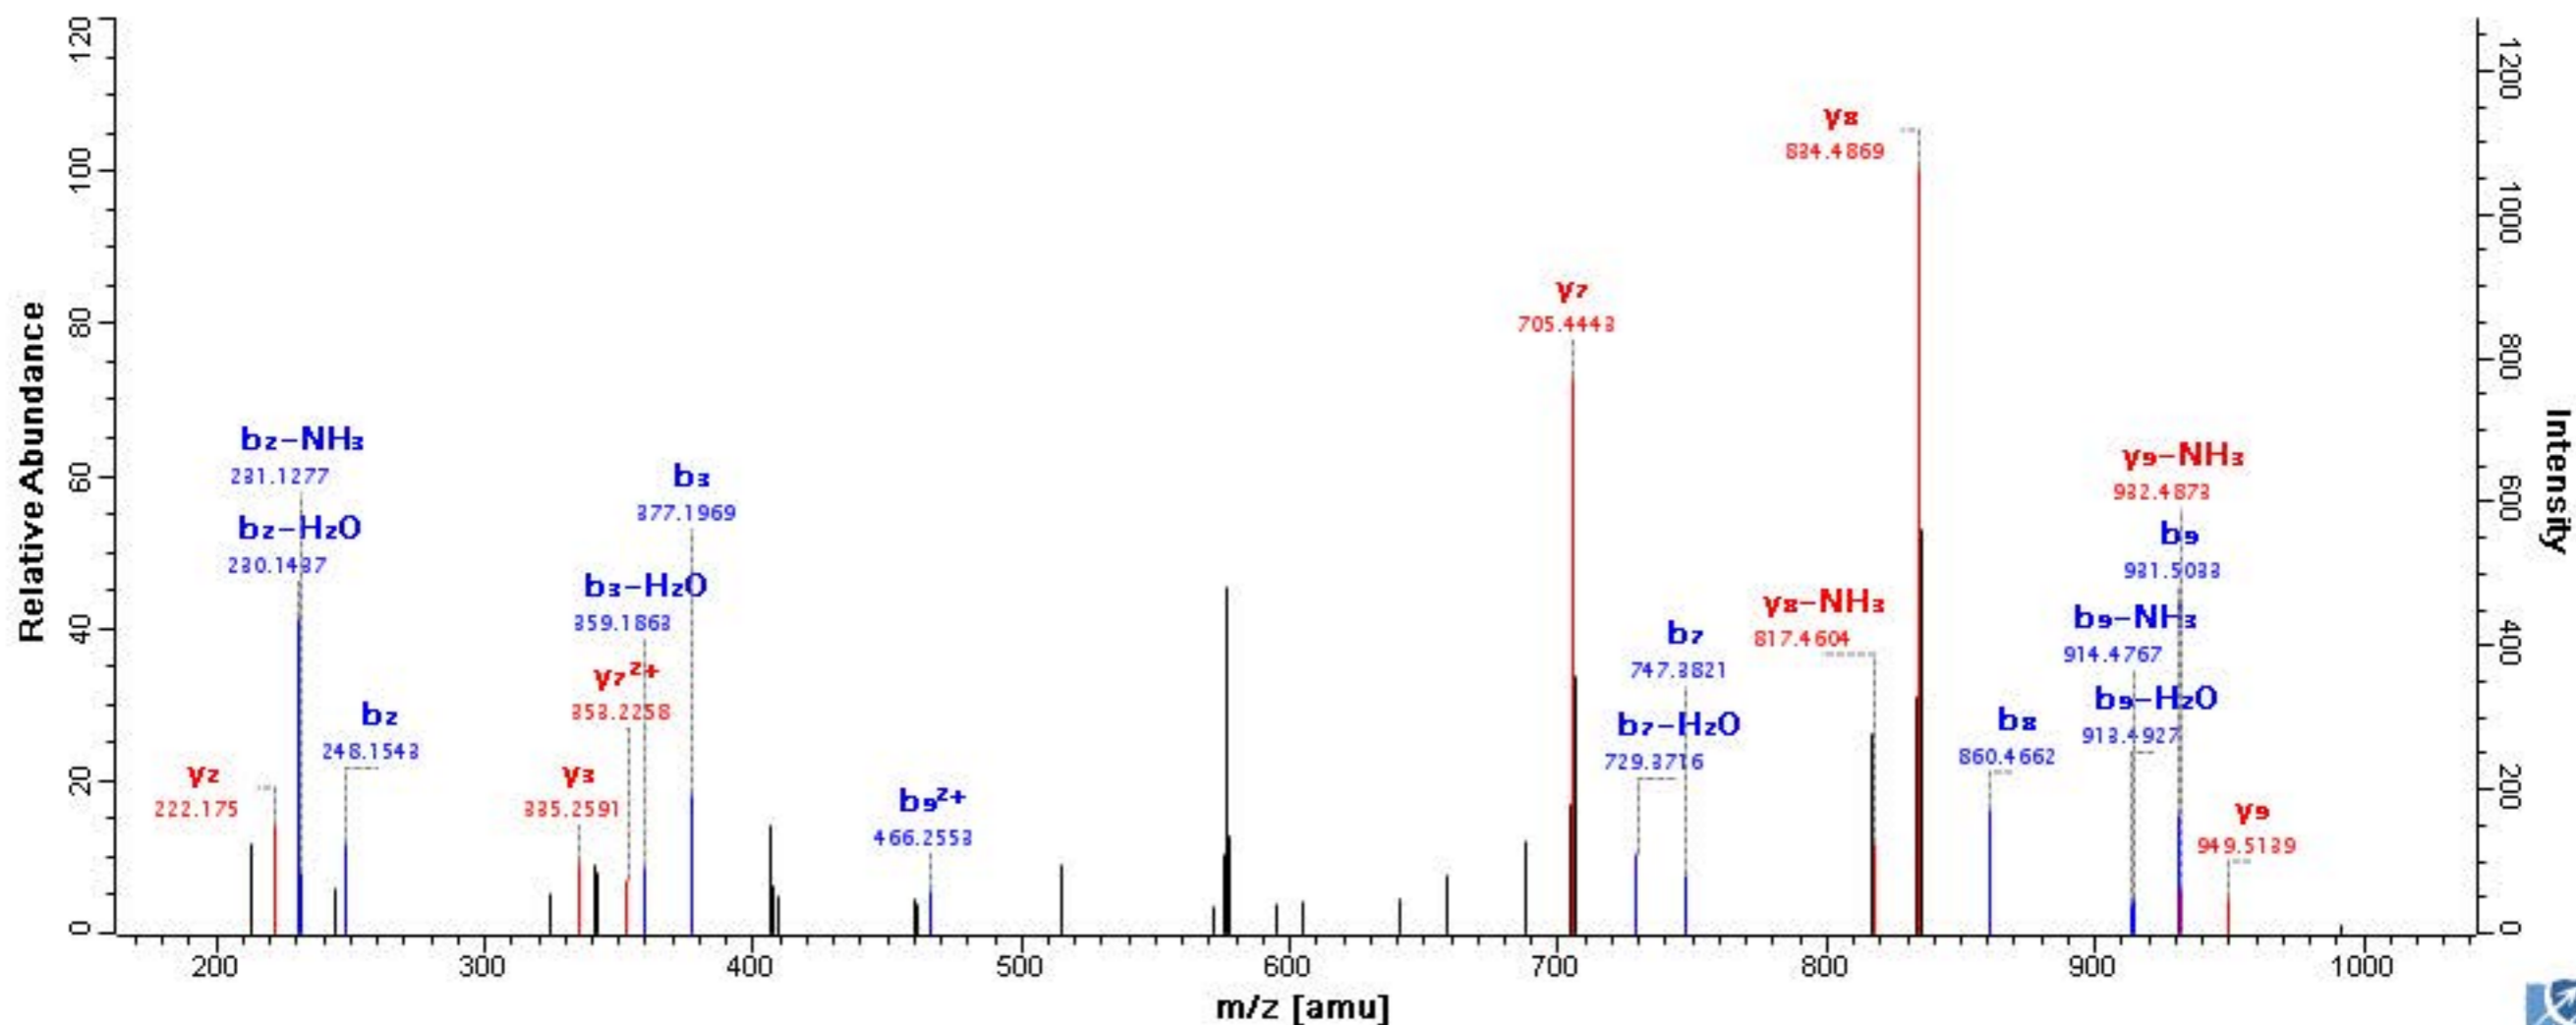

#### precursor information

|                   |                     |
|-------------------|---------------------|
| Mass:             | 1072.57656          |
| m/z:              | System.Collections. |
| Charge:           | System.Collections. |
| Retentiontime:    | System.Collections. |
| Score:            | 135.4286            |
| Mass Error [ppm]: | 0.10927             |
| PEP:              | 5.2308E-07          |
| Precursor Type:   | MULTI               |

#### general information

|                       |           |
|-----------------------|-----------|
| Annotation:           | 6 of 10   |
| AminoAcids Coverage:  | 60 %      |
| Intensity Coverage:   | 52 %      |
| Protein Localisation: | 41 ... 50 |

| b <sup>2+</sup> ion |          | b ion     |          |     | y ion |          | y <sup>2+</sup> ion |           |          |           |
|---------------------|----------|-----------|----------|-----|-------|----------|---------------------|-----------|----------|-----------|
| Δ dalton            | mass     | Δ dalton  | mass     | seq |       | Δ dalton | mass                | Δ dalton  | mass     |           |
|                     | 133.1273 |           | 133.1273 | 1   | K     | 9        |                     |           |          |           |
|                     | 248.1543 | +0.096489 | 248.1543 | 2   | D     | 8        | 949.5139            | +0.336299 | 949.5139 |           |
|                     | 377.1969 | -0.175398 | 377.1969 | 3   | E     | 7        | 834.4869            | +0.029197 | 834.4869 |           |
|                     | 448.234  |           | 448.234  | 4   | A     | 6        | 705.4443            | +0.030225 | 353.2258 | -0.075104 |
|                     | 563.2609 |           | 563.2609 | 5   | D     | 5        | 634.4072            |           | 634.4072 |           |
|                     | 634.2981 |           | 634.2981 | 6   | A     | 4        | 519.3803            |           | 519.3803 |           |
|                     | 747.3821 | -0.004798 | 747.3821 | 7   | I     | 3        | 448.3432            |           | 448.3432 |           |
|                     | 860.4662 | +0.018438 | 860.4662 | 8   | I     | 2        | 335.2591            | +0.060918 | 335.2591 |           |
| +0.146997           | 466.2553 | +0.017213 | 931.5033 | 9   | A     | 1        | 222.175             | +0.047296 | 222.175  |           |
|                     |          |           |          | 10  | K     | 0        | 151.1379            |           | 151.1379 |           |

Source: 20120325\_VR\_Bsu\_TripleSILAC\_pL2ESL5rep\_F13  
 Scannumber: 7813  
 Protein: BSU40180; yydF  
 Peptide Score: 245.99  
 Method: ITMS; CID; 3

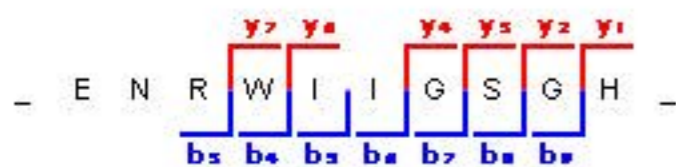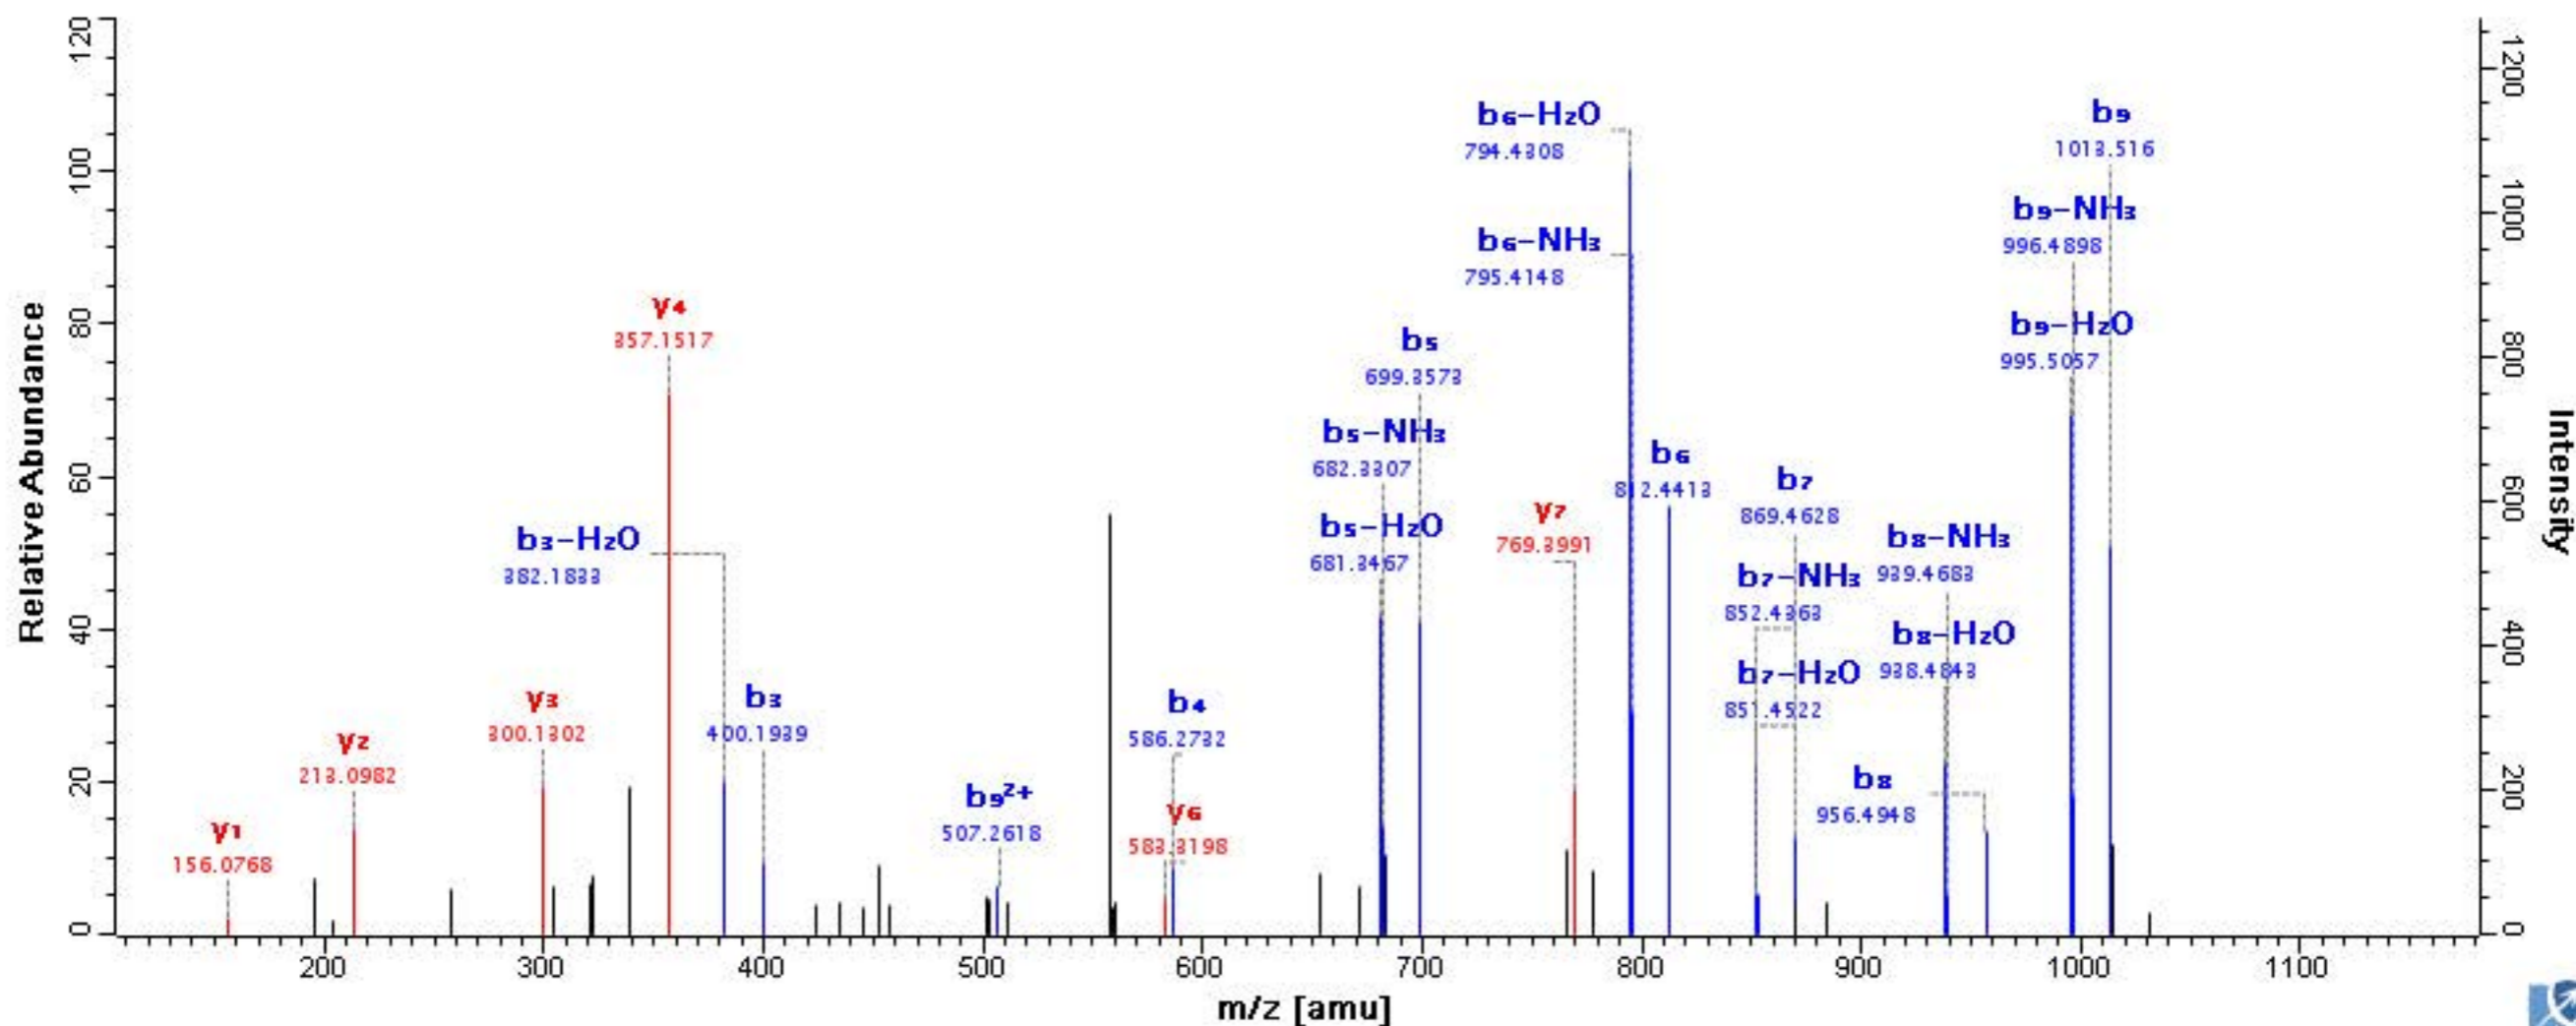

#### precursor information

|                   |                     |
|-------------------|---------------------|
| Mass:             | 1167.57812          |
| m/z:              | System.Collections. |
| Charge:           | System.Collections. |
| Retentiontime:    | System.Collections. |
| Score:            | 245.9939            |
| Mass Error [ppm]: | -0.33308            |
| PEP:              | 5.5092E-230         |
| Precursor Type:   | ISO                 |

#### general information

|                       |           |
|-----------------------|-----------|
| Annotation:           | 8 of 10   |
| AminoAcids Coverage:  | 80 %      |
| Intensity Coverage:   | 75 %      |
| Protein Localisation: | 40 ... 49 |

| b <sup>2+</sup> ion |              | b ion      |              |     | y ion    |      |                         |
|---------------------|--------------|------------|--------------|-----|----------|------|-------------------------|
| Δ dalton            | mass         | Δ dalton   | mass         | seq | Δ dalton | mass |                         |
|                     | 130.04986956 |            | 130.04986956 | 1   | E        | 9    |                         |
|                     | 244.09279701 |            | 244.09279701 | 2   | N        | 8    | 1039.5431883            |
|                     | 400.19390804 | +0.0132453 | 400.19390804 | 3   | R        | 7    | 925.50026081            |
|                     | 586.27322099 | +0.0943327 | 586.27322099 | 4   | W        | 6    | 769.39914979 +0.0739337 |
|                     | 699.35728497 | +0.0045925 | 699.35728497 | 5   | I        | 5    | 583.31983683 +0.077441  |
|                     | 812.44134895 | +0.0095177 | 812.44134895 | 6   | I        | 4    | 470.23577285            |
|                     | 869.46281268 | -0.1567214 | 869.46281268 | 7   | G        | 3    | 357.15170887 +0.0371949 |
|                     | 956.49484109 | +0.0635696 | 956.49484109 | 8   | S        | 2    | 300.13024515 +0.0213357 |
| -0.3182482          | 507.26179064 | -0.0067833 | 1013.5163048 | 9   | G        | 1    | 213.09821674 -0.0016133 |
|                     |              |            |              | 10  | H        | 0    | 156.07675302 -0.1472944 |

Source: 20120325\_VR\_Bsu\_TripleSILAC\_pL2ESLRep\_F18  
 Scannumber: 3208  
 Protein: BSU24480; yqhR  
 Peptide Score: 138.22  
 Method: ITMS; CID; 3

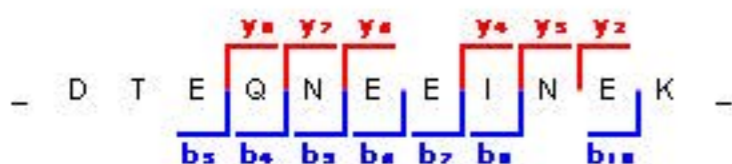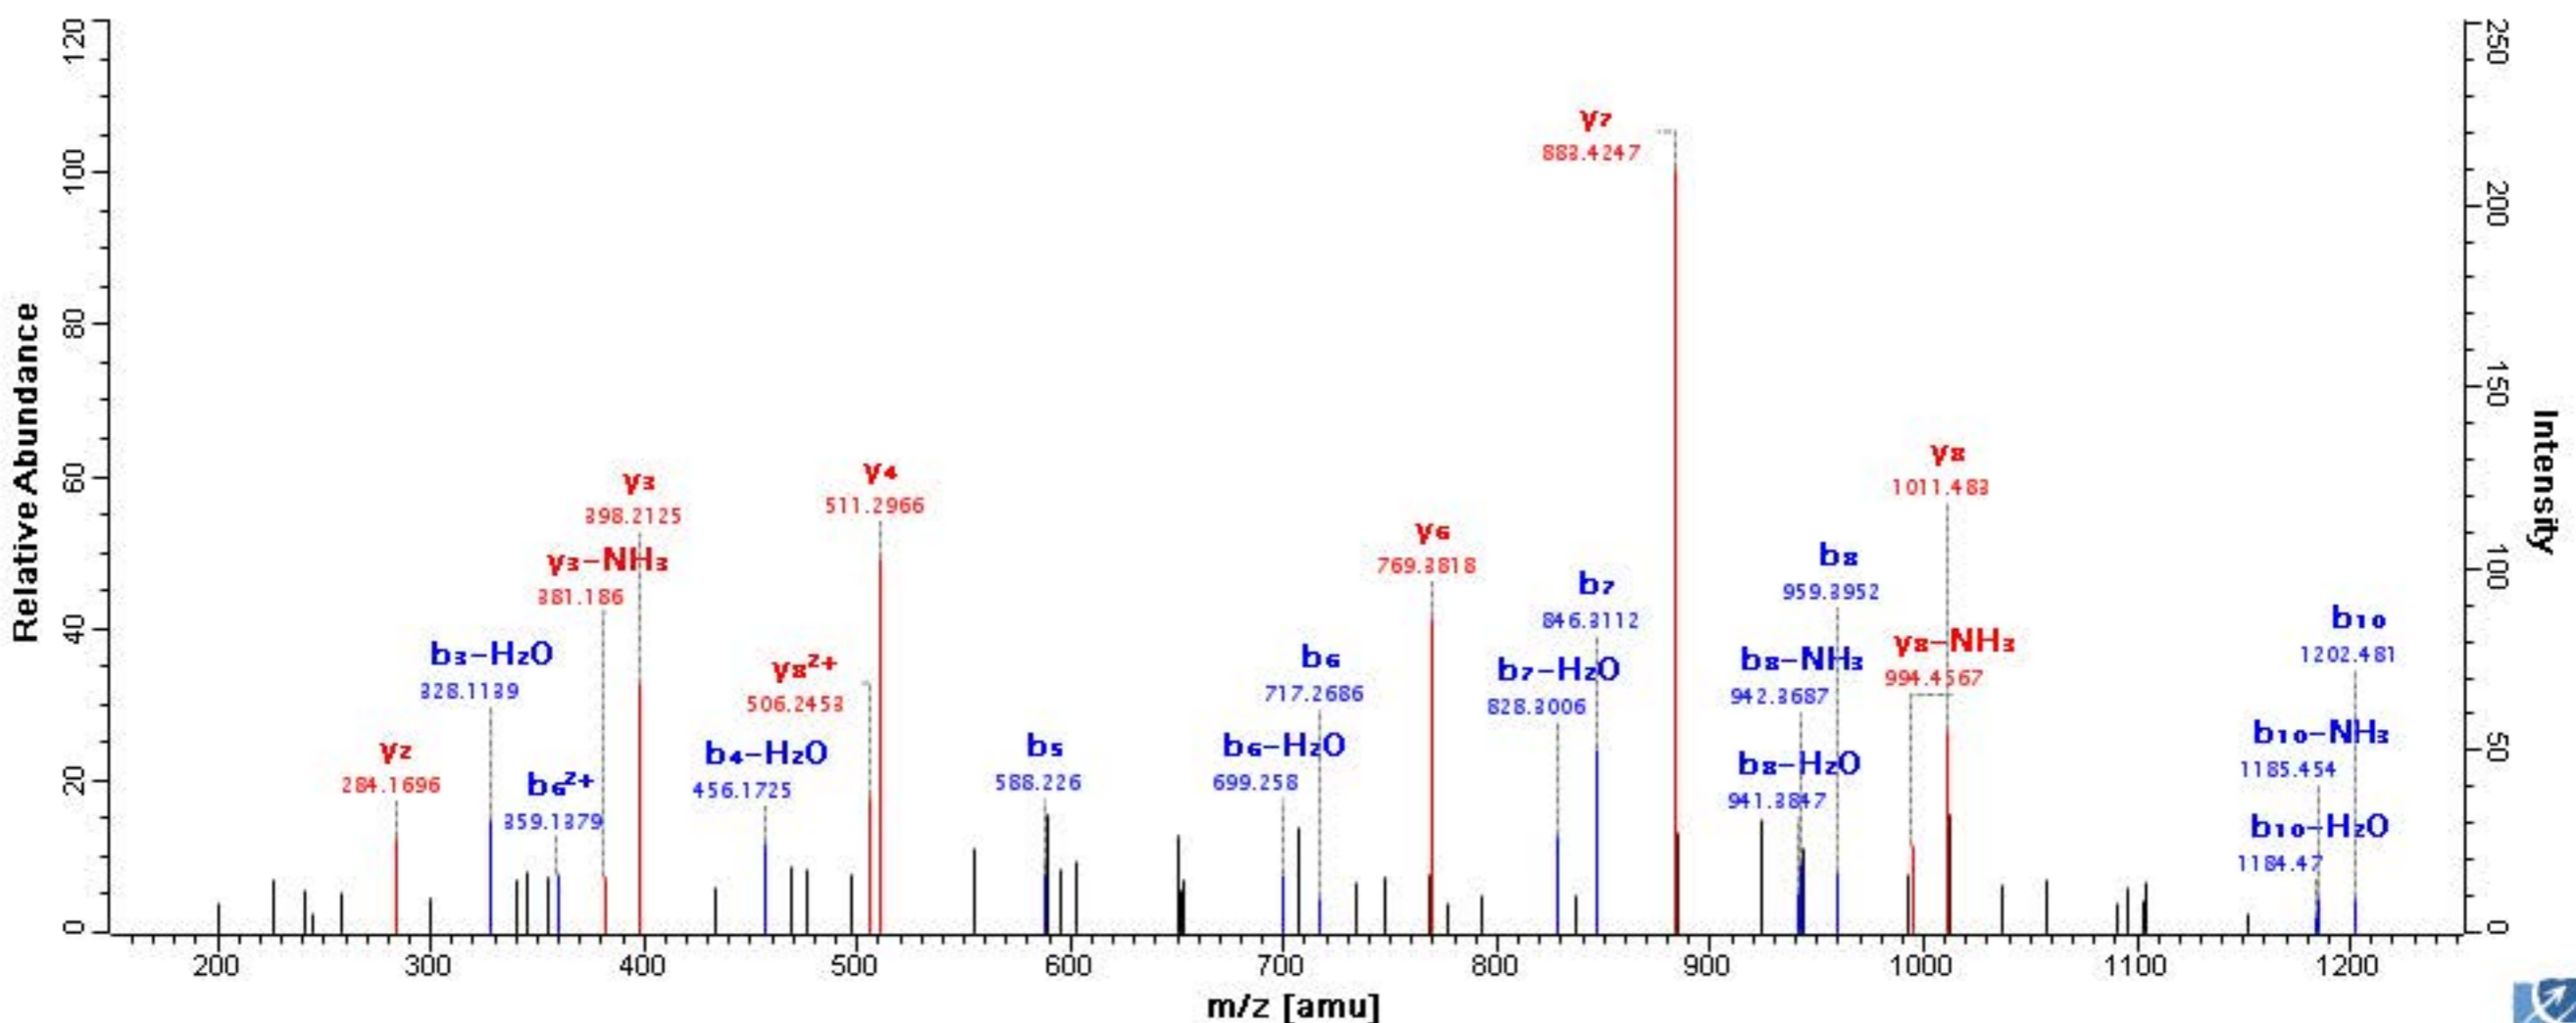

#### precursor information

|                   |                     |
|-------------------|---------------------|
| Mass:             | 1355.59301          |
| m/z:              | System.Collections. |
| Charge:           | System.Collections. |
| Retentiontime:    | System.Collections. |
| Score:            | 138.2187            |
| Mass Error [ppm]: | -0.15224            |
| PEP:              | 4.875E-06           |
| Precursor Type:   | ISO                 |

#### general information

|                       |          |
|-----------------------|----------|
| Annotation:           | 8 of 11  |
| AminoAcids Coverage:  | 73 %     |
| Intensity Coverage:   | 58 %     |
| Protein Localisation: | 7 ... 17 |

| b <sup>2+</sup> ion |          | b ion     |          |    |     |    | γ ion    |           | γ <sup>2+</sup> ion |           |
|---------------------|----------|-----------|----------|----|-----|----|----------|-----------|---------------------|-----------|
| Δ dalton            | mass     | Δ dalton  | mass     |    | seq |    | Δ dalton | mass      | Δ dalton            | mass      |
|                     | 116.0342 |           | 116.0342 | 1  | D   | 10 |          |           |                     |           |
|                     | 217.0819 |           | 217.0819 | 2  | T   | 9  | 1241.574 |           | 1241.574            |           |
|                     | 346.1245 |           | 346.1245 | 3  | E   | 8  | 1140.526 |           | 1140.526            |           |
|                     | 474.1831 |           | 474.1831 | 4  | Q   | 7  | 1011.483 | +0.035215 | 506.2453            | +0.090965 |
|                     | 588.226  | +0.06679  | 588.226  | 5  | N   | 6  | 883.4247 | +0.018597 | 883.4247            |           |
| +0.229194           | 359.1379 | +0.085964 | 717.2686 | 6  | E   | 5  | 769.3818 | +0.180787 | 769.3818            |           |
|                     | 846.3112 | -0.112208 | 846.3112 | 7  | E   | 4  | 640.3392 |           | 640.3392            |           |
|                     | 959.3952 | -0.011945 | 959.3952 | 8  | I   | 3  | 511.2966 | -0.045001 | 511.2966            |           |
|                     | 1073.438 |           | 1073.438 | 9  | N   | 2  | 398.2125 | +0.100892 | 398.2125            |           |
|                     | 1202.481 | +0.182441 | 1202.481 | 10 | E   | 1  | 284.1696 | -0.21525  | 284.1696            |           |
|                     |          |           |          | 11 | K   | 0  | 155.127  |           | 155.127             |           |

Source: 20120419\_VR\_Bsu\_TripleSILAC\_T1L1T2rep\_OG\_F02  
 Scannumber: 19971  
 Protein: BSU09460; yhdG  
 Peptide Score: 241.15  
 Method: ITMS; CID; 3

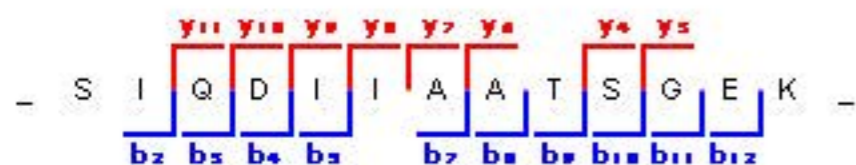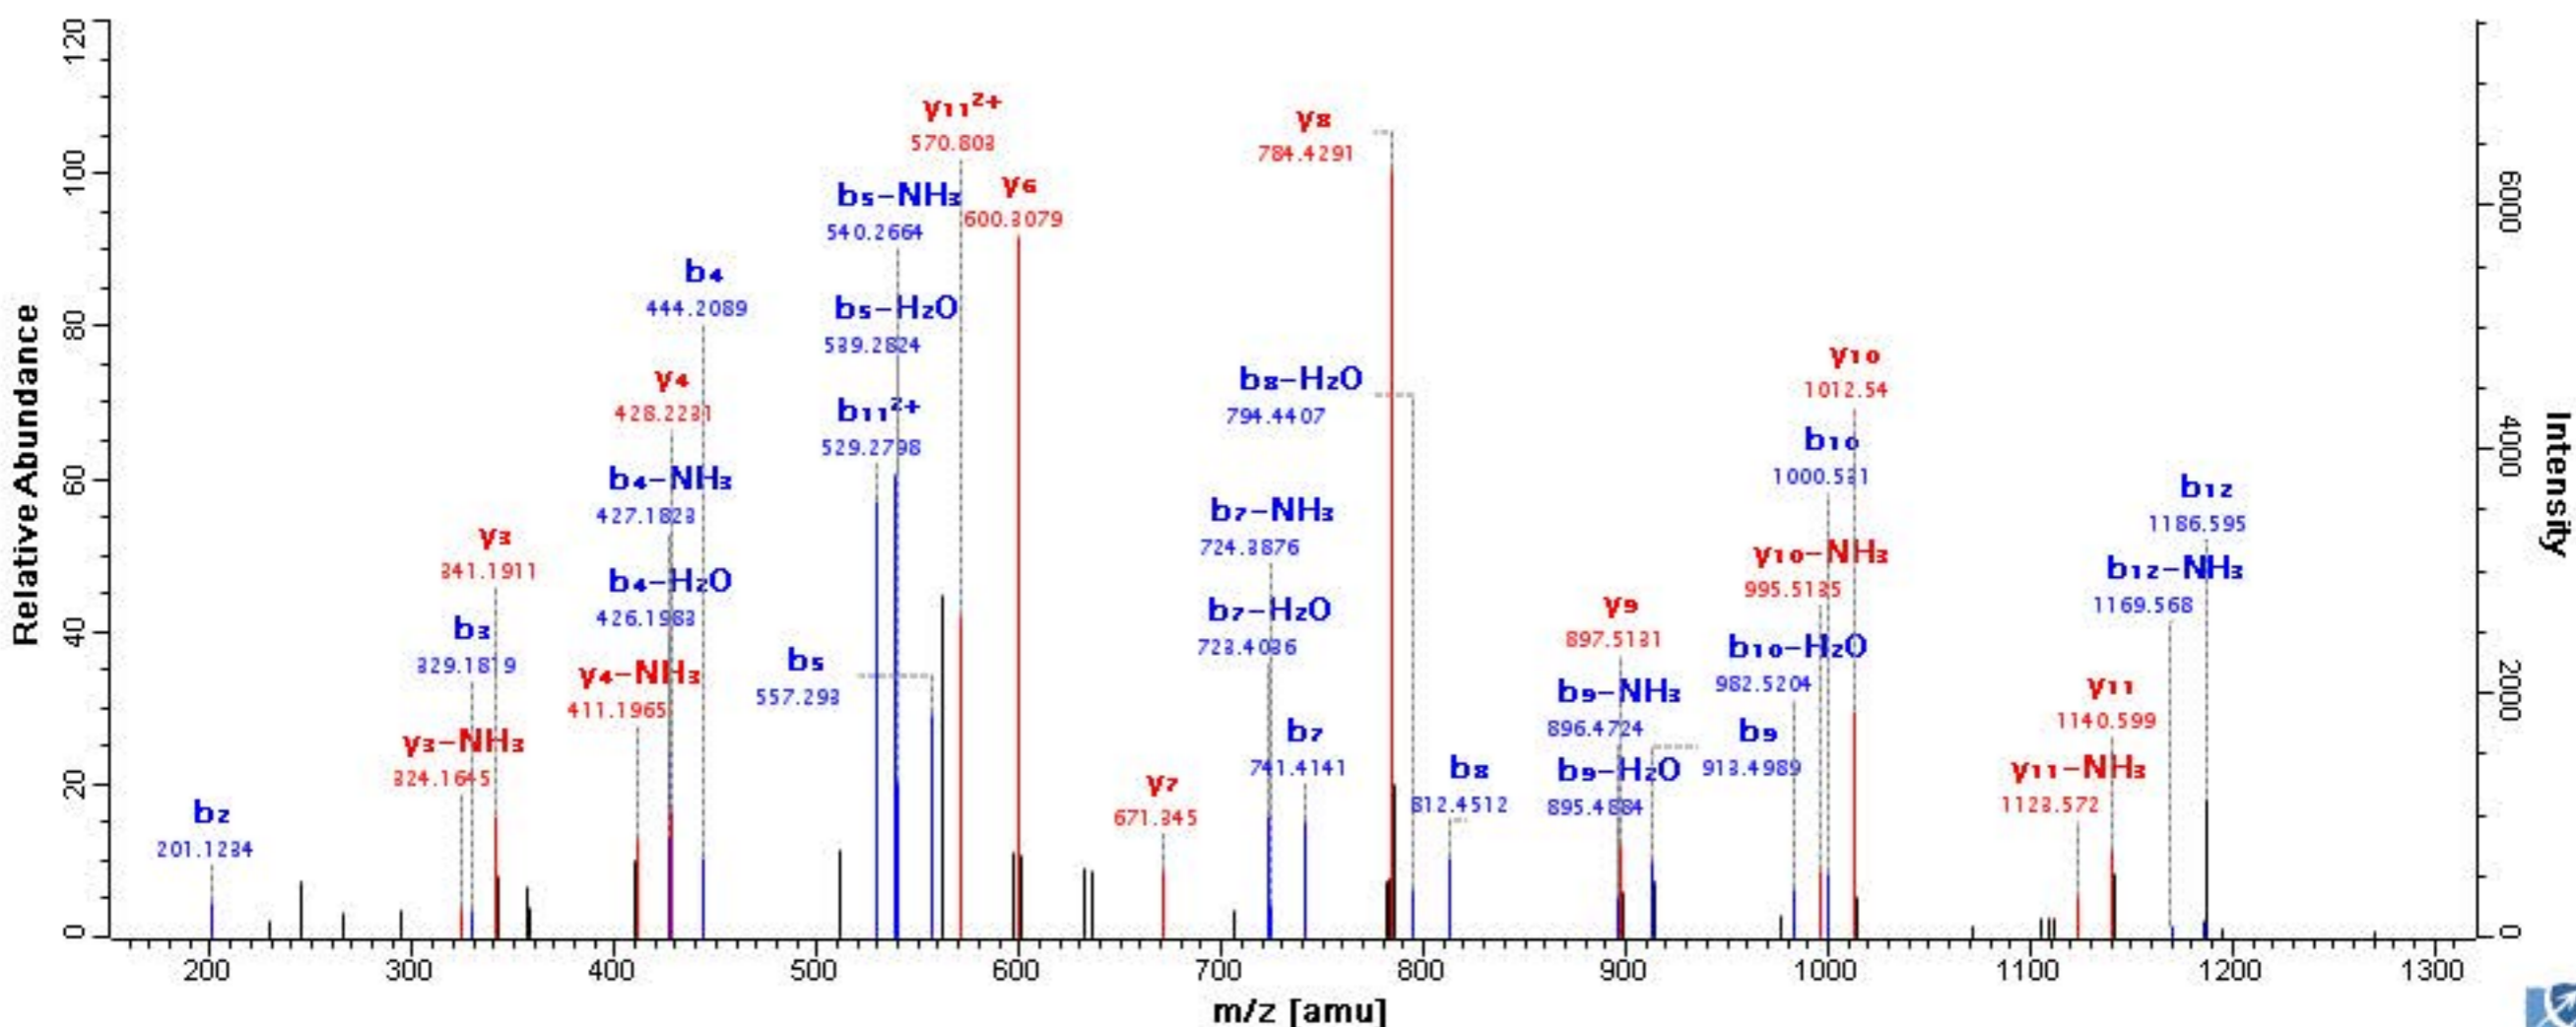

#### precursor information

|                   |                     |
|-------------------|---------------------|
| Mass:             | 1339.70763          |
| m/z:              | System.Collections. |
| Charge:           | System.Collections. |
| Retentiontime:    | System.Collections. |
| Score:            | 241.1508            |
| Mass Error [ppm]: | 0.12643             |
| PEP:              | 1.011E-94           |
| Precursor Type:   | ISO                 |

#### general information

|                       |           |
|-----------------------|-----------|
| Annotation:           | 11 of 13  |
| AminoAcids Coverag    | 85 %      |
| Intensity Coverage:   | 74 %      |
| Protein Localisation: | 10 ... 22 |

| b <sup>2+</sup> ion |          | b ion     |          |     | γ ion |          | γ <sup>2+</sup> ion |           |          |           |
|---------------------|----------|-----------|----------|-----|-------|----------|---------------------|-----------|----------|-----------|
| Δ dalton            | mass     | Δ dalton  | mass     | seq |       | Δ dalton | mass                | Δ dalton  | mass     |           |
|                     | 88.0393  |           | 88.0393  | 1   | S     | 12       |                     |           |          |           |
|                     | 201.1234 | +0.148039 | 201.1234 | 2   | I     | 11       | 1253.683            |           | 1253.683 |           |
|                     | 329.1819 | +0.111145 | 329.1819 | 3   | Q     | 10       | 1140.599            | +0.009878 | 570.803  | +0.275104 |
|                     | 444.2089 | +0.163913 | 444.2089 | 4   | D     | 9        | 1012.54             | -0.018398 | 1012.54  |           |
|                     | 557.293  | -0.046188 | 557.293  | 5   | I     | 8        | 897.5131            | +0.112061 | 897.5131 |           |
|                     | 670.377  |           | 670.377  | 6   | I     | 7        | 784.4291            | -0.020733 | 784.4291 |           |
|                     | 741.4141 | -0.001411 | 741.4141 | 7   | A     | 6        | 671.345             | +0.149513 | 671.345  |           |
|                     | 812.4512 | +0.094531 | 812.4512 | 8   | A     | 5        | 600.3079            | +0.031597 | 600.3079 |           |
|                     | 913.4989 | +0.037393 | 913.4989 | 9   | T     | 4        | 529.2708            |           | 529.2708 |           |
|                     | 1000.531 | +0.044427 | 1000.531 | 10  | S     | 3        | 428.2231            | +0.000972 | 428.2231 |           |
| +0.048645           | 529.2798 |           | 1057.552 | 11  | G     | 2        | 341.1911            | +0.134441 | 341.1911 |           |
|                     | 1186.595 | -0.094276 | 1186.595 | 12  | E     | 1        | 284.1696            |           | 284.1696 |           |
|                     |          |           |          | 13  | K     | 0        | 155.127             |           | 155.127  |           |

Source: 20120419\_VR\_Bsu\_TripleSILAC\_T1L1T2rep\_OG\_F04  
 Scannumber: 24270  
 Protein: BSU24860; yqqQ  
 Peptide Score: 93.84  
 Method: ITMS; CID; 3

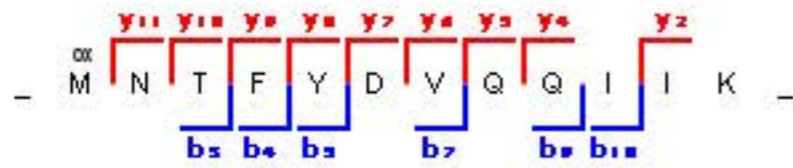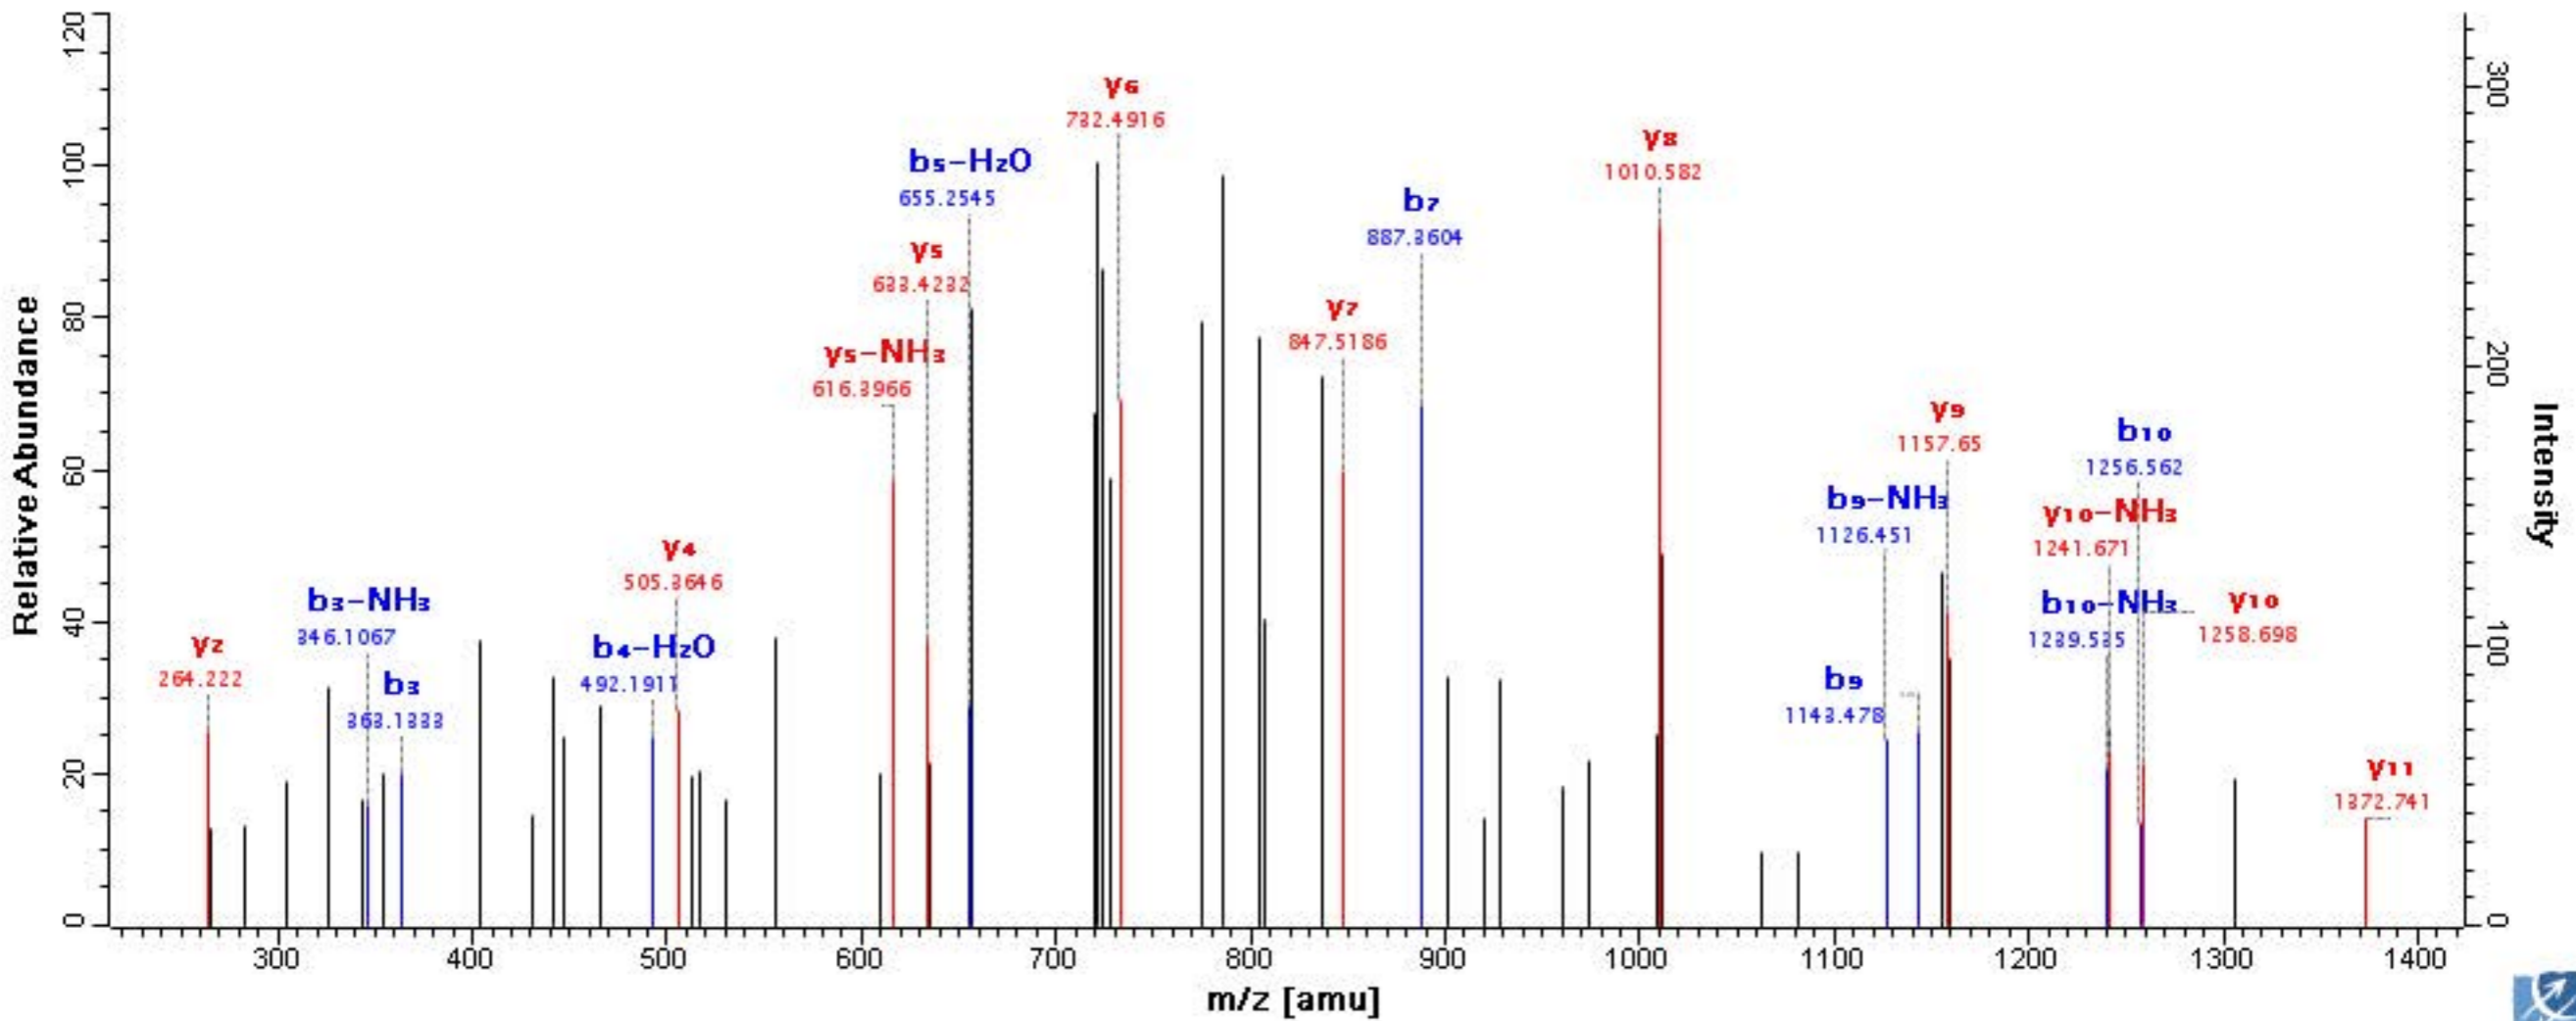

**precursor information**

|                   |                     |
|-------------------|---------------------|
| Mass:             | 1518.77175          |
| m/z:              | System.Collections. |
| Charge:           | System.Collections. |
| Retentiontime:    | System.Collections. |
| Score:            | 93.83924            |
| Mass Error [ppm]: | 1.7971              |
| PEP:              | 0.00077256          |
| Precursor Type:   | ISO                 |

**general information**

|                       |          |
|-----------------------|----------|
| Annotation:           | 10 of 12 |
| AminoAcids Coverag    | 83 %     |
| Intensity Coverage:   | 32 %     |
| Protein Localisation: | 1 ... 12 |

| b ion      |                |    |     |    | y ion          |            |  |
|------------|----------------|----|-----|----|----------------|------------|--|
| Δ dalton   | mass           |    | seq |    | Δ dalton       | mass       |  |
|            | 148.042675695  | 1  | M   | 11 |                |            |  |
|            | 262.085603142  | 2  | N   | 10 | 1372.740899462 | +0.2121035 |  |
| -0.0248832 | 363.133281616  | 3  | T   | 9  | 1258.697972015 | +0.3274186 |  |
|            | 510.201695532  | 4  | F   | 8  | 1157.65029354  | +0.1531733 |  |
|            | 673.265024071  | 5  | Y   | 7  | 1010.581879624 | +0.1303396 |  |
|            | 788.291967103  | 6  | D   | 6  | 847.518551086  | +0.1538732 |  |
| +0.2532054 | 887.360381019  | 7  | V   | 5  | 732.491608054  | +0.1481625 |  |
|            | 1015.41895853  | 8  | Q   | 4  | 633.423194138  | +0.4007805 |  |
| +0.1709015 | 1143.477536042 | 9  | Q   | 3  | 505.364616626  | +0.0283887 |  |
| +0.3601529 | 1256.561600022 | 10 | I   | 2  | 377.306039115  |            |  |
|            | 1369.645664002 | 11 | I   | 1  | 264.221975135  | +0.0940039 |  |
|            |                | 12 | K   | 0  | 151.137911154  |            |  |

Source: 20120419\_VR\_Bsu\_TripleSILAC\_T1L1T2rep\_OG\_F05  
 Scannumber: 11321  
 Protein: BSU14730; ylaC  
 Peptide Score: 101.11  
 Method: ITMS; CID; 3

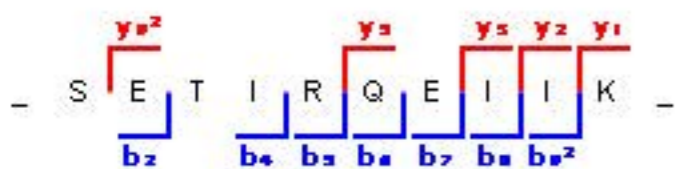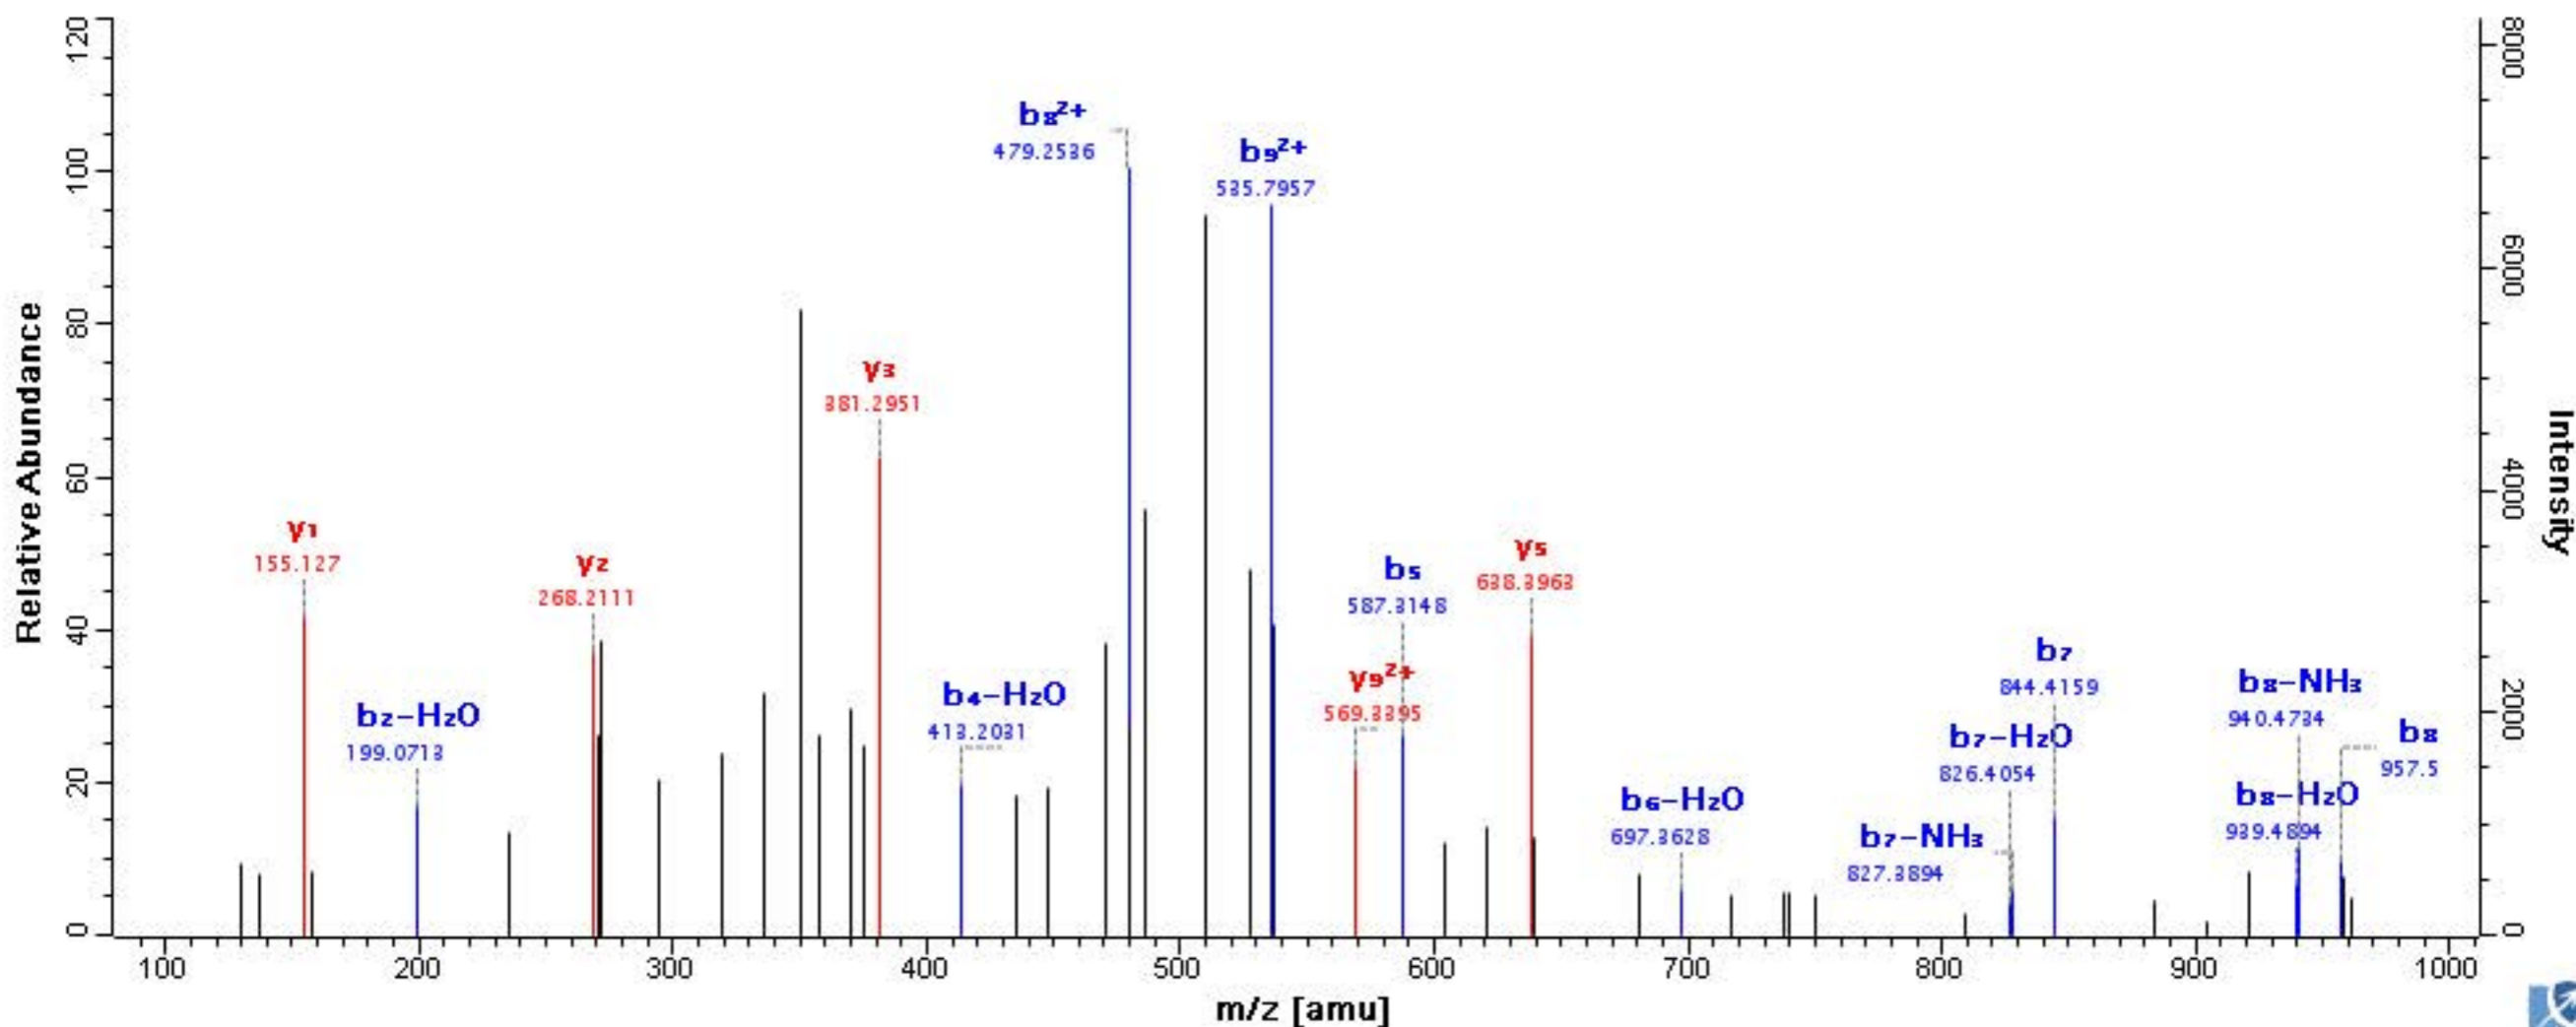

#### precursor information

|                   |                     |
|-------------------|---------------------|
| Mass:             | 1215.68237          |
| m/z:              | System.Collections. |
| Charge:           | System.Collections. |
| Retentiontime:    | System.Collections. |
| Score:            | 101.1051            |
| Mass Error [ppm]: | 0.059098            |
| PEP:              | 0.0021765           |
| Precursor Type:   | MULTI               |

#### general information

|                       |             |
|-----------------------|-------------|
| Annotation:           | 8 of 10     |
| AminoAcids Coverage:  | 80 %        |
| Intensity Coverage:   | 40 %        |
| Protein Localisation: | 107 ... 116 |

| b <sup>2+</sup> ion |          | b ion     |          |     | y ion |          | y <sup>2+</sup> ion |          |           |
|---------------------|----------|-----------|----------|-----|-------|----------|---------------------|----------|-----------|
| Δ dalton            | mass     | Δ dalton  | mass     | seq |       | Δ dalton | mass                | Δ dalton | mass      |
|                     | 88.0393  |           | 88.0393  | 1   | S     |          |                     |          |           |
|                     | 217.0819 |           | 217.0819 | 2   | E     | 1137.672 |                     | 569.3395 | +0.027919 |
|                     | 318.1296 |           | 318.1296 | 3   | T     | 1008.629 |                     | 1008.629 |           |
|                     | 431.2136 |           | 431.2136 | 4   | I     | 907.5815 |                     | 907.5815 |           |
|                     | 587.3148 | +0.051032 | 587.3148 | 5   | R     | 794.4974 |                     | 794.4974 |           |
|                     | 715.3733 |           | 715.3733 | 6   | Q     | 638.3963 | +0.029663           | 638.3963 |           |
|                     | 844.4159 | +0.295992 | 844.4159 | 7   | E     | 510.3377 |                     | 510.3377 |           |
| +0.074066           | 479.2536 | +0.203444 | 957.5    | 8   | I     | 381.2951 | +0.017491           | 381.2951 |           |
| +0.010123           | 535.7957 |           | 1070.584 | 9   | I     | 268.2111 | +0.035485           | 268.2111 |           |
|                     |          |           |          | 10  | K     | 155.127  | +0.021129           | 155.127  |           |

Source: 20120419\_VR\_Bsu\_TripleSILAC\_T1L1T2rep\_OG\_F05  
 Scannumber: 18753  
 Protein: BSU06370; pbuG; yebB  
 Peptide Score: 107.15  
 Method: ITMS; CID; 3

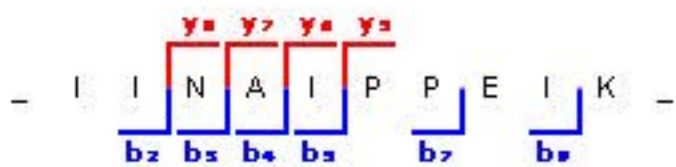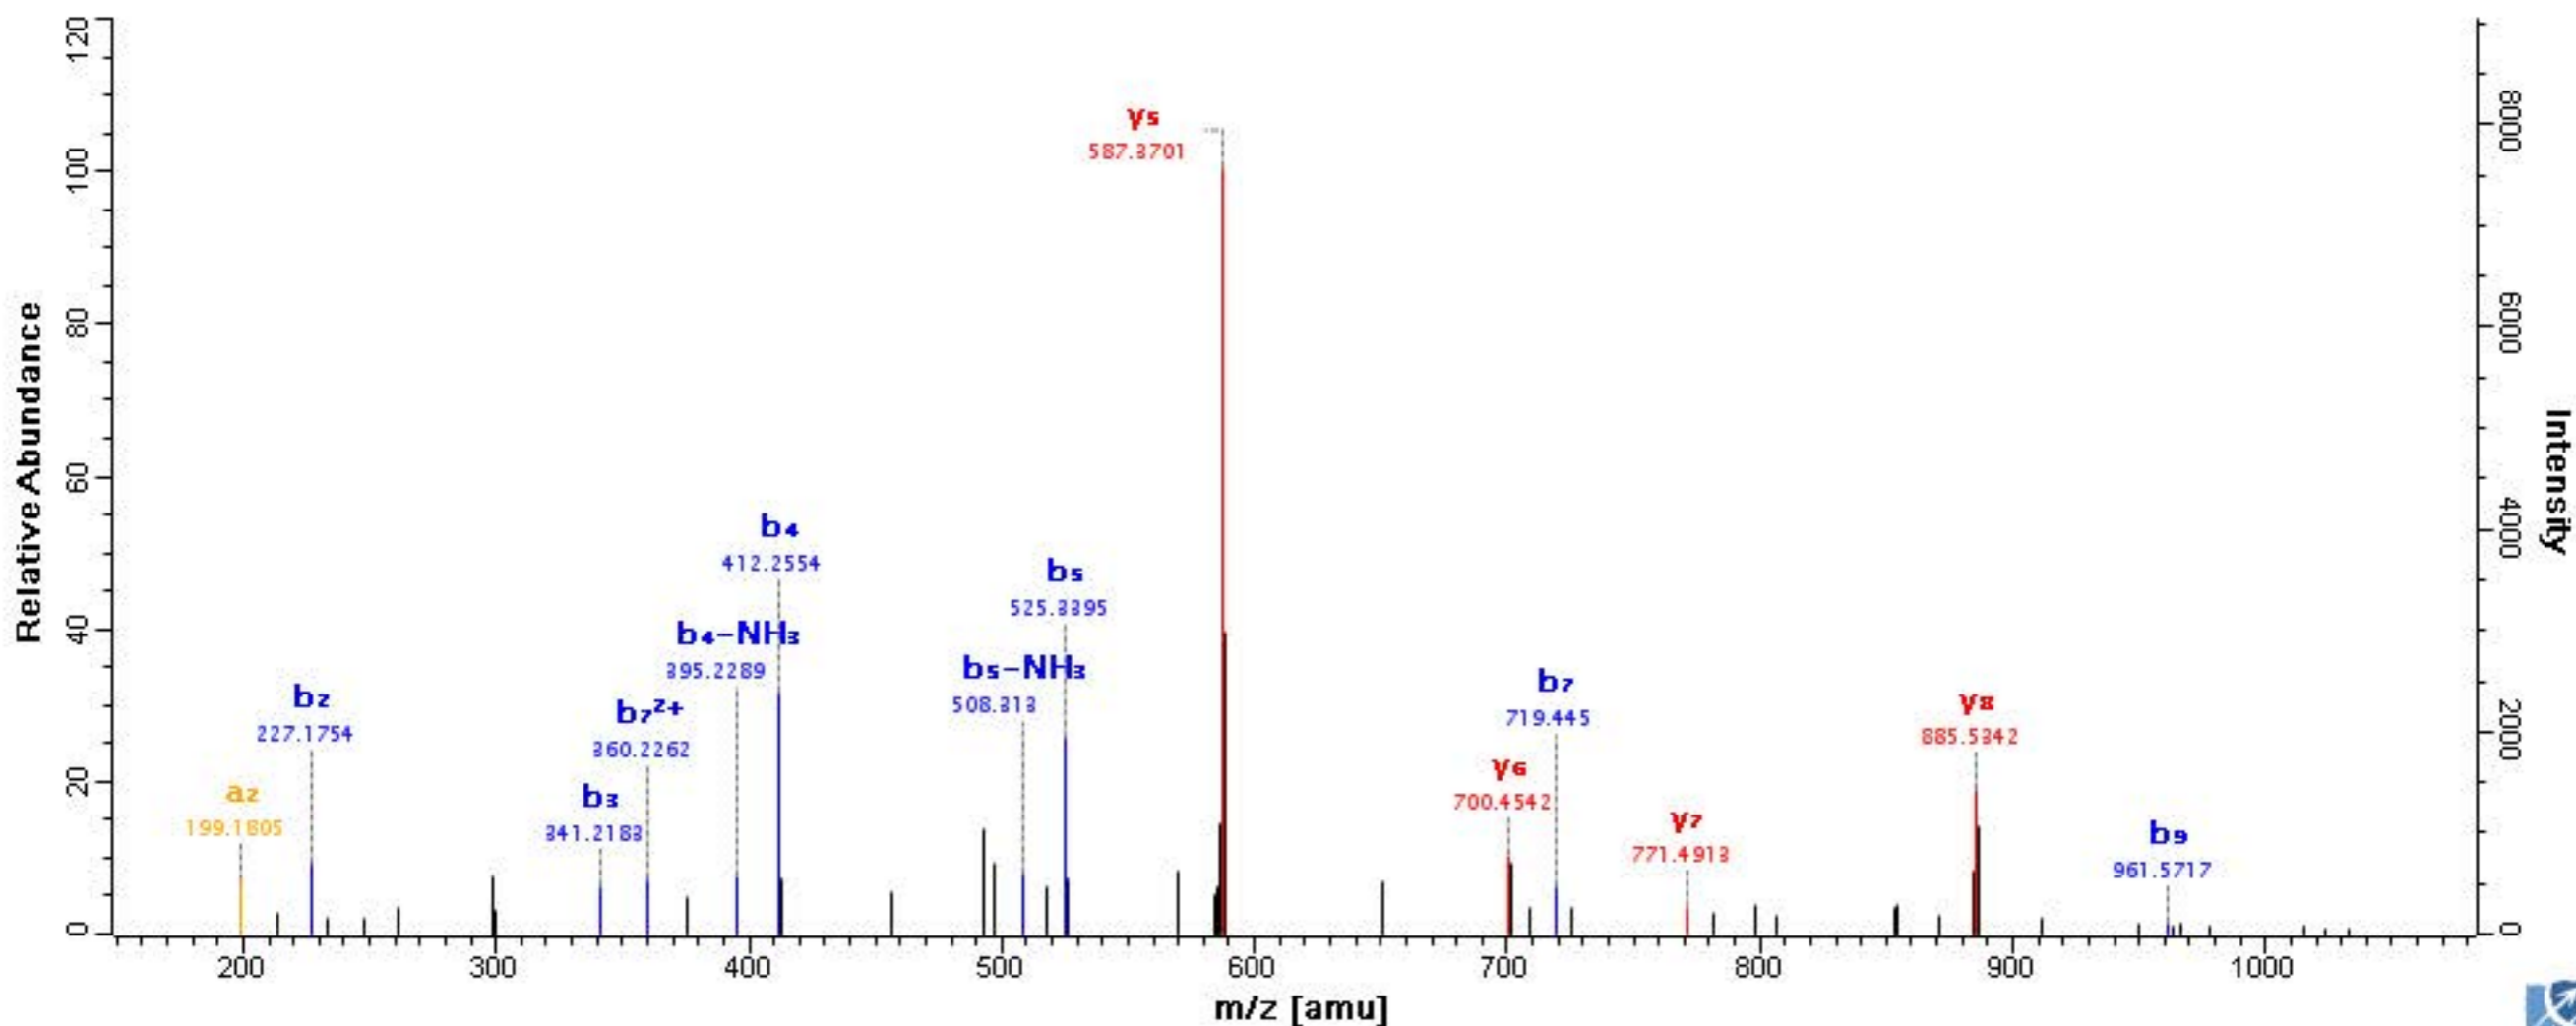

#### precursor information

|                   |                     |
|-------------------|---------------------|
| Mass:             | 1106.6699           |
| m/z:              | System.Collections. |
| Charge:           | System.Collections. |
| Retentiontime:    | System.Collections. |
| Score:            | 107.154             |
| Mass Error [ppm]: | -0.041328           |
| PEP:              | 0.0019493           |
| Precursor Type:   | MULTI               |

#### general information

|                       |             |
|-----------------------|-------------|
| Annotation:           | 7 of 10     |
| AminoAcids Coverage:  | 70 %        |
| Intensity Coverage:   | 52 %        |
| Protein Localisation: | 131 ... 140 |

| a ion     |          | b <sup>2+</sup> ion |          | b ion     |          |    |     | y ion    |          |
|-----------|----------|---------------------|----------|-----------|----------|----|-----|----------|----------|
| Δ dalton  | mass     | Δ dalton            | mass     | Δ dalton  | mass     |    | seq | Δ dalton | mass     |
|           | 86.09643 |                     | 114.0913 |           | 114.0913 | 1  | I   | 9        |          |
| +0.039298 | 199.1805 |                     | 227.1754 | -0.003194 | 227.1754 | 2  | I   | 8        | 998.6183 |
|           | 313.2234 |                     | 341.2183 | +0.205801 | 341.2183 | 3  | N   | 7        | 885.5342 |
|           | 384.2605 |                     | 412.2554 | +0.050157 | 412.2554 | 4  | A   | 6        | 771.4913 |
|           | 497.3446 |                     | 525.3395 | +0.105131 | 525.3395 | 5  | I   | 5        | 700.4542 |
|           | 594.3974 |                     | 622.3923 |           | 622.3923 | 6  | P   | 4        | 587.3701 |
|           | 691.4501 | +0.154214           | 360.2262 | +0.155365 | 719.445  | 7  | P   | 3        | 490.3173 |
|           | 820.4927 |                     | 848.4876 |           | 848.4876 | 8  | E   | 2        | 393.2646 |
|           | 933.5768 |                     | 961.5717 | +0.006247 | 961.5717 | 9  | I   | 1        | 264.222  |
|           |          |                     |          |           |          | 10 | K   | 0        | 151.1379 |



Source: 20120419\_VR\_Bsu\_TripleSILAC\_T1L1T2rep\_OG\_F05  
 Scannumber: 22532  
 Protein: BSU33330; yvsH  
 Peptide Score: 130.66  
 Method: ITMS; CID; 3

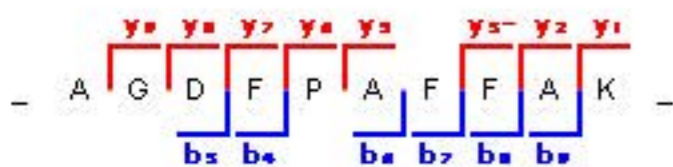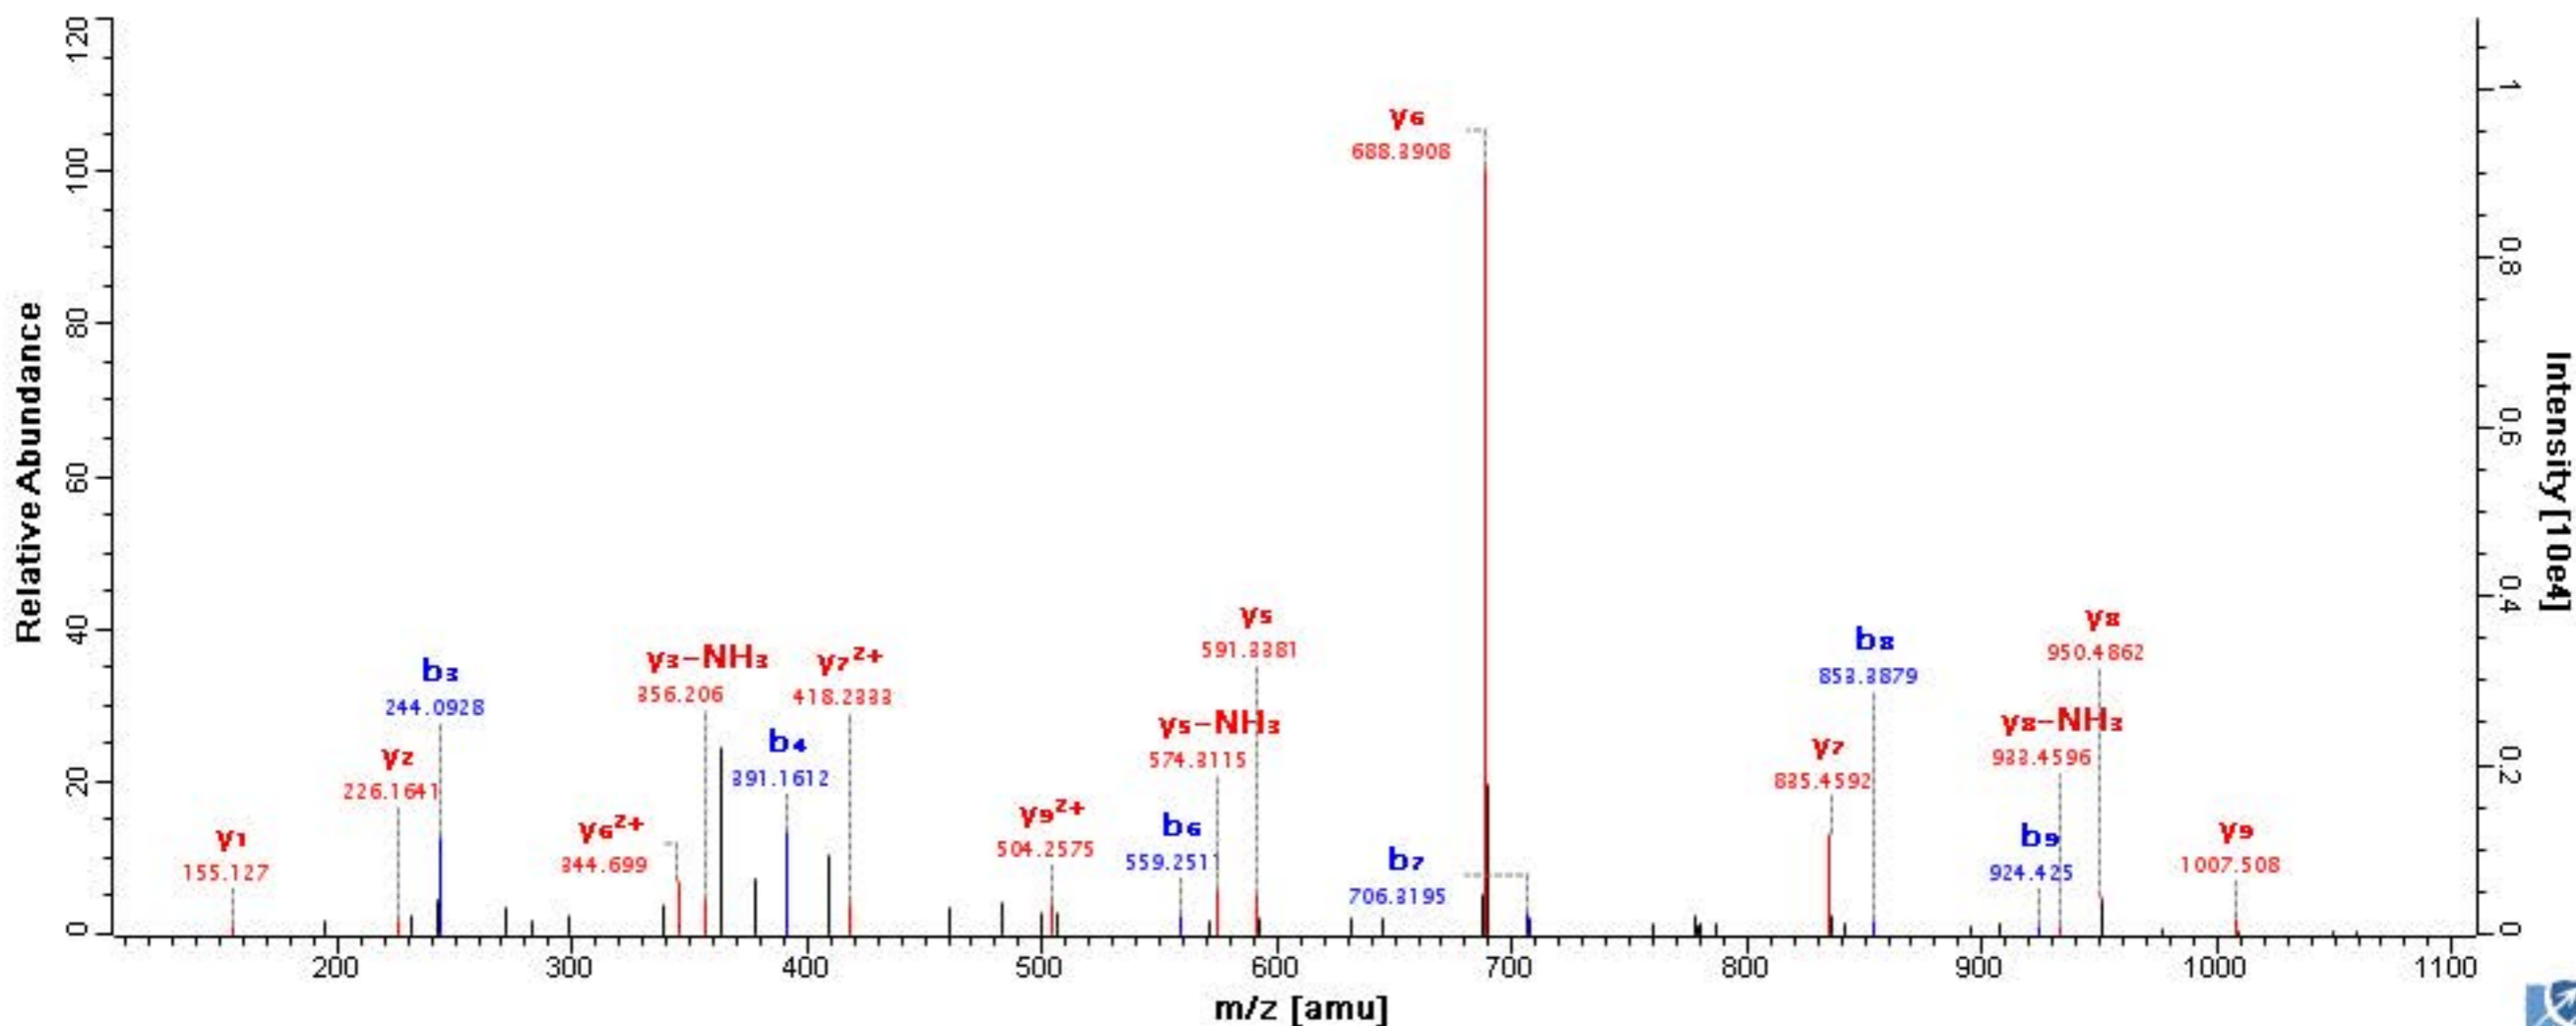

#### precursor information

|                   |                     |
|-------------------|---------------------|
| Mass:             | 1069.52395          |
| m/z:              | System.Collections. |
| Charge:           | System.Collections. |
| Retentiontime:    | System.Collections. |
| Score:            | 130.6557            |
| Mass Error [ppm]: | 0.61795             |
| PEP:              | 0.00010818          |
| Precursor Type:   | MULTI               |

#### general information

|                       |             |
|-----------------------|-------------|
| Annotation:           | 9 of 10     |
| AminoAcids Coverage:  | 90 %        |
| Intensity Coverage:   | 59 %        |
| Protein Localisation: | 332 ... 341 |

| b ion      |              |    |     |   | y ion        |            | y <sup>2+</sup> ion |            |
|------------|--------------|----|-----|---|--------------|------------|---------------------|------------|
| Δ dalton   | mass         |    | seq |   | Δ dalton     | mass       | Δ dalton            | mass       |
|            | 72.044390254 | 1  | A   | 9 |              |            |                     |            |
|            | 129.06585398 | 2  | G   | 8 | 1007.5076429 | +0.1066149 | 504.25745969        | +0.2659778 |
| -0.0709769 | 244.09279701 | 3  | D   | 7 | 950.48617919 | +0.0519678 | 950.48617919        |            |
| -0.0275745 | 391.16121093 | 4  | F   | 6 | 835.45923616 | -0.0409012 | 418.23325631        | -0.050334  |
|            | 488.21397478 | 5  | P   | 5 | 688.39082224 | -0.0244892 | 344.69904936        | +0.4203049 |
| -0.4301047 | 559.25108857 | 6  | A   | 4 | 591.33805839 | +0.0699006 | 591.33805839        |            |
| +0.0445112 | 706.31950248 | 7  | F   | 3 | 520.3009446  |            | 520.3009446         |            |
| +0.2189562 | 853.3879164  | 8  | F   | 2 | 373.23253069 |            | 373.23253069        |            |
| +0.2705265 | 924.42503019 | 9  | A   | 1 | 226.16411677 | +0.0121375 | 226.16411677        |            |
|            |              | 10 | K   | 0 | 155.12700298 | +0.1223104 | 155.12700298        |            |

Source: 20120419\_VR\_Bsu\_TripleSILAC\_T1L1T2rep\_OG\_F05  
 Scannumber: 24507  
 Protein: albE; BSU37410; ywhO  
 Peptide Score: 101.11  
 Method: ITMS; CID; 3

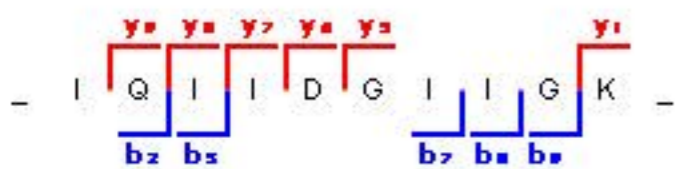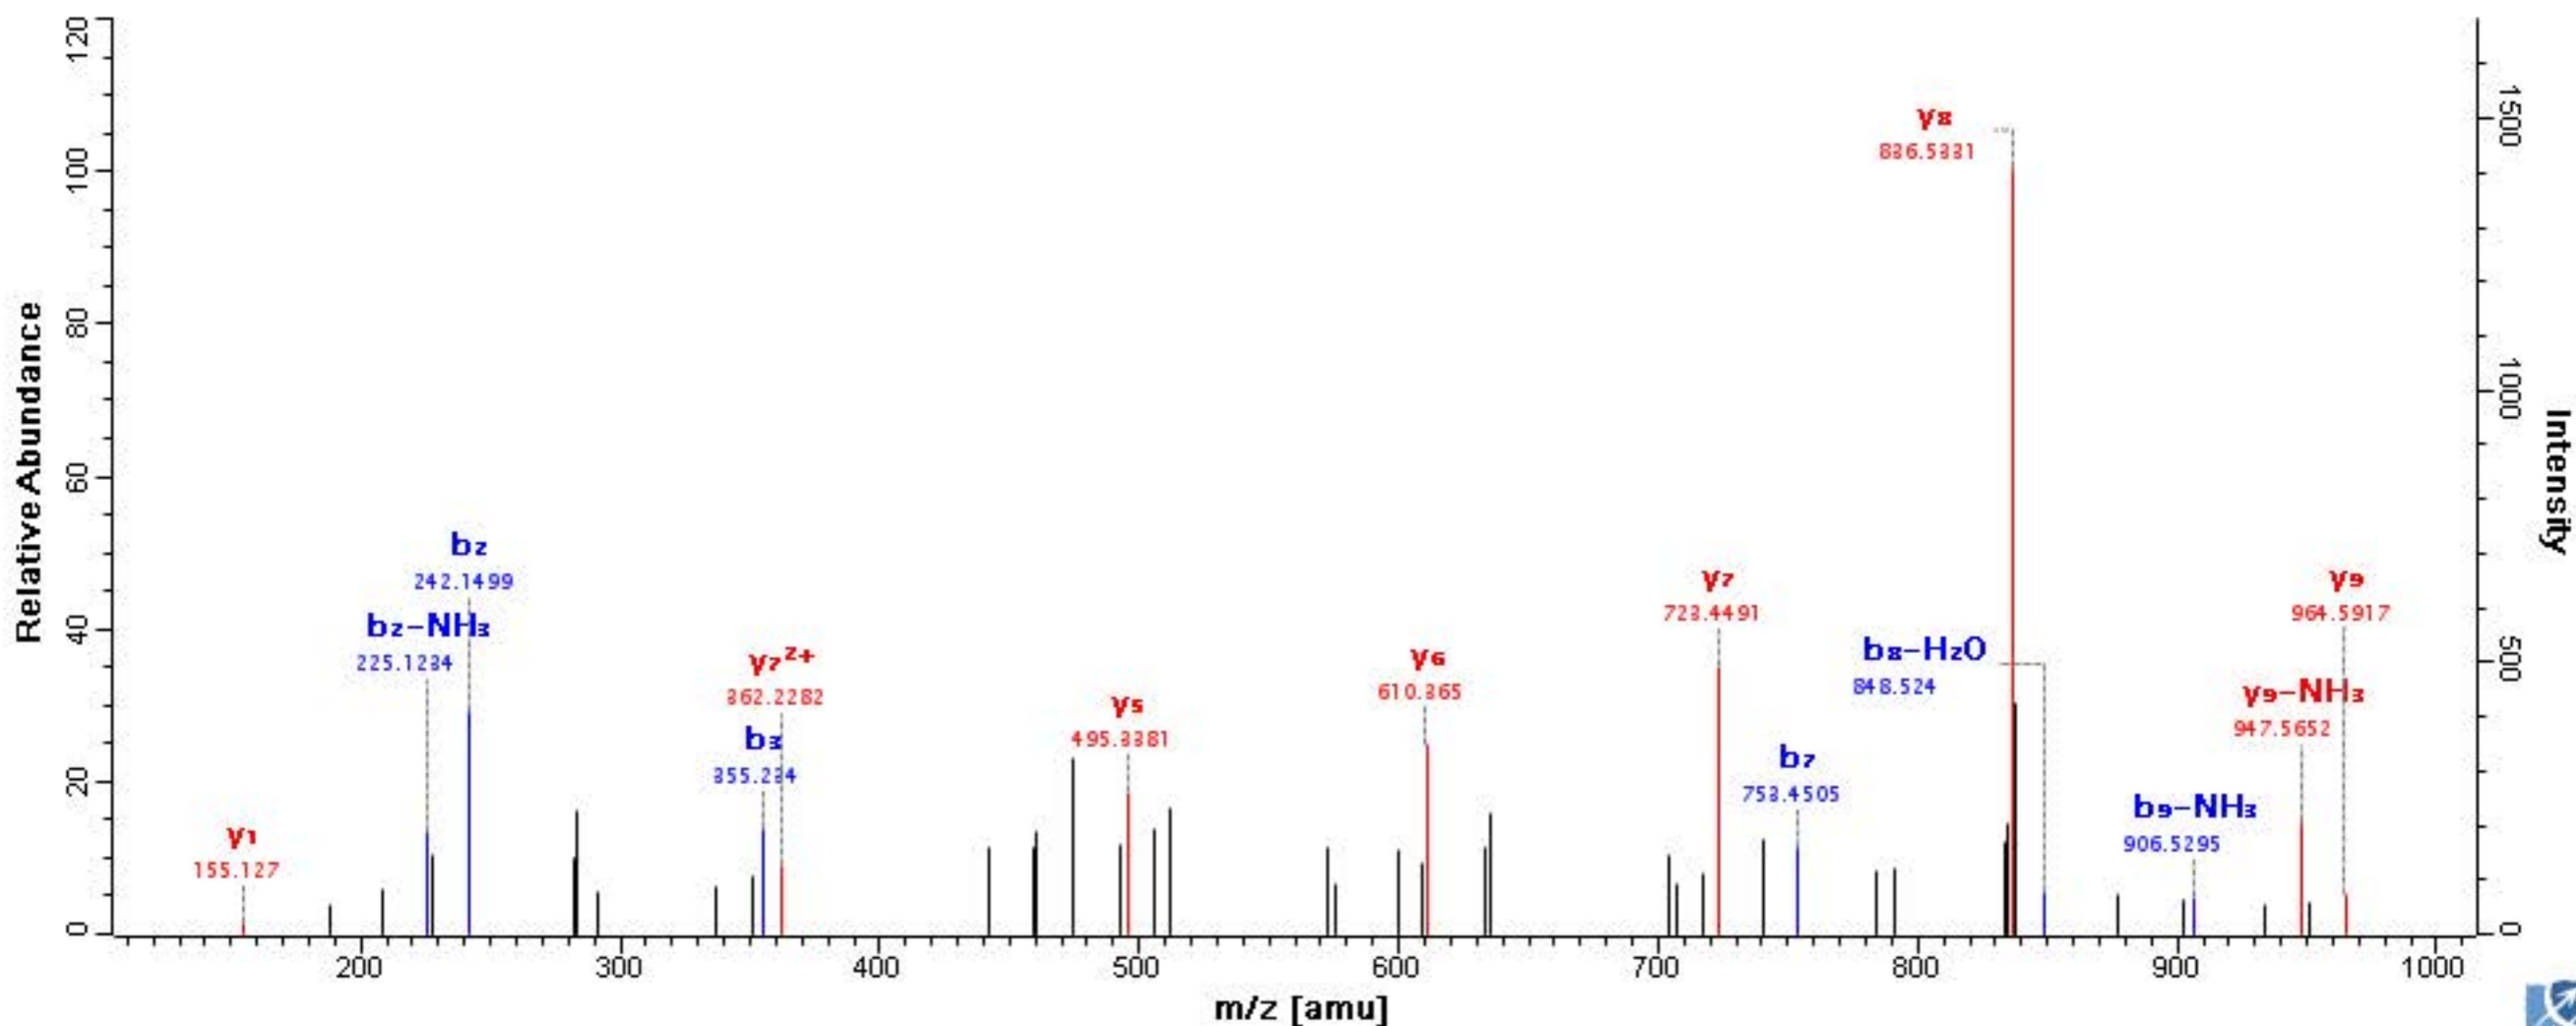

#### precursor information

|                   |                     |
|-------------------|---------------------|
| Mass:             | 1076.66869          |
| m/z:              | System.Collections. |
| Charge:           | System.Collections. |
| Retentiontime:    | System.Collections. |
| Score:            | 101.1051            |
| Mass Error [ppm]: | 0.17705             |
| PEP:              | 0.0052591           |
| Precursor Type:   | ISO                 |

#### general information

|                       |             |
|-----------------------|-------------|
| Annotation:           | 9 of 10     |
| AminoAcids Coverage:  | 90 %        |
| Intensity Coverage:   | 44 %        |
| Protein Localisation: | 247 ... 256 |

| b ion      |              |    |     |   | y ion        |            | y <sup>2+</sup> ion |            |
|------------|--------------|----|-----|---|--------------|------------|---------------------|------------|
| Δ dalton   | mass         |    | seq |   | Δ dalton     | mass       | Δ dalton            | mass       |
|            | 114.09134045 | 1  | I   | 9 |              |            |                     |            |
| +0.0286709 | 242.14991796 | 2  | Q   | 8 | 964.5917069  | +0.0933517 | 964.5917069         |            |
| +0.1143457 | 355.23398194 | 3  | I   | 7 | 836.53312938 | +0.0407232 | 836.53312938        |            |
|            | 468.31804592 | 4  | I   | 6 | 723.4490654  | +0.173249  | 362.22817094        | +0.3313383 |
|            | 583.34498895 | 5  | D   | 5 | 610.36500142 | +0.1804087 | 610.36500142        |            |
|            | 640.36645267 | 6  | G   | 4 | 495.33805839 | +0.2246247 | 495.33805839        |            |
| +0.1153403 | 753.45051666 | 7  | I   | 3 | 438.31659467 |            | 438.31659467        |            |
|            | 866.53458064 | 8  | I   | 2 | 325.23253069 |            | 325.23253069        |            |
|            | 923.55604436 | 9  | G   | 1 | 212.14846671 |            | 212.14846671        |            |
|            |              | 10 | K   | 0 | 155.12700298 | +0.0660512 | 155.12700298        |            |

Source: 20120419\_VR\_Bsu\_TripleSILAC\_T1L1T2rep\_OG\_F06  
 Scannumber: 19264  
 Protein: BSU27760; csbX  
 Peptide Score: 102.07  
 Method: ITMS; CID; 3

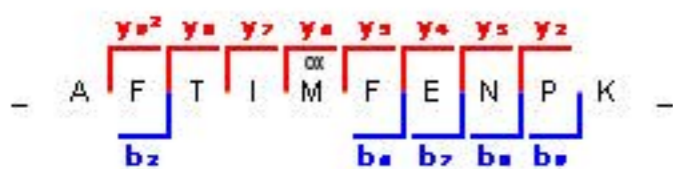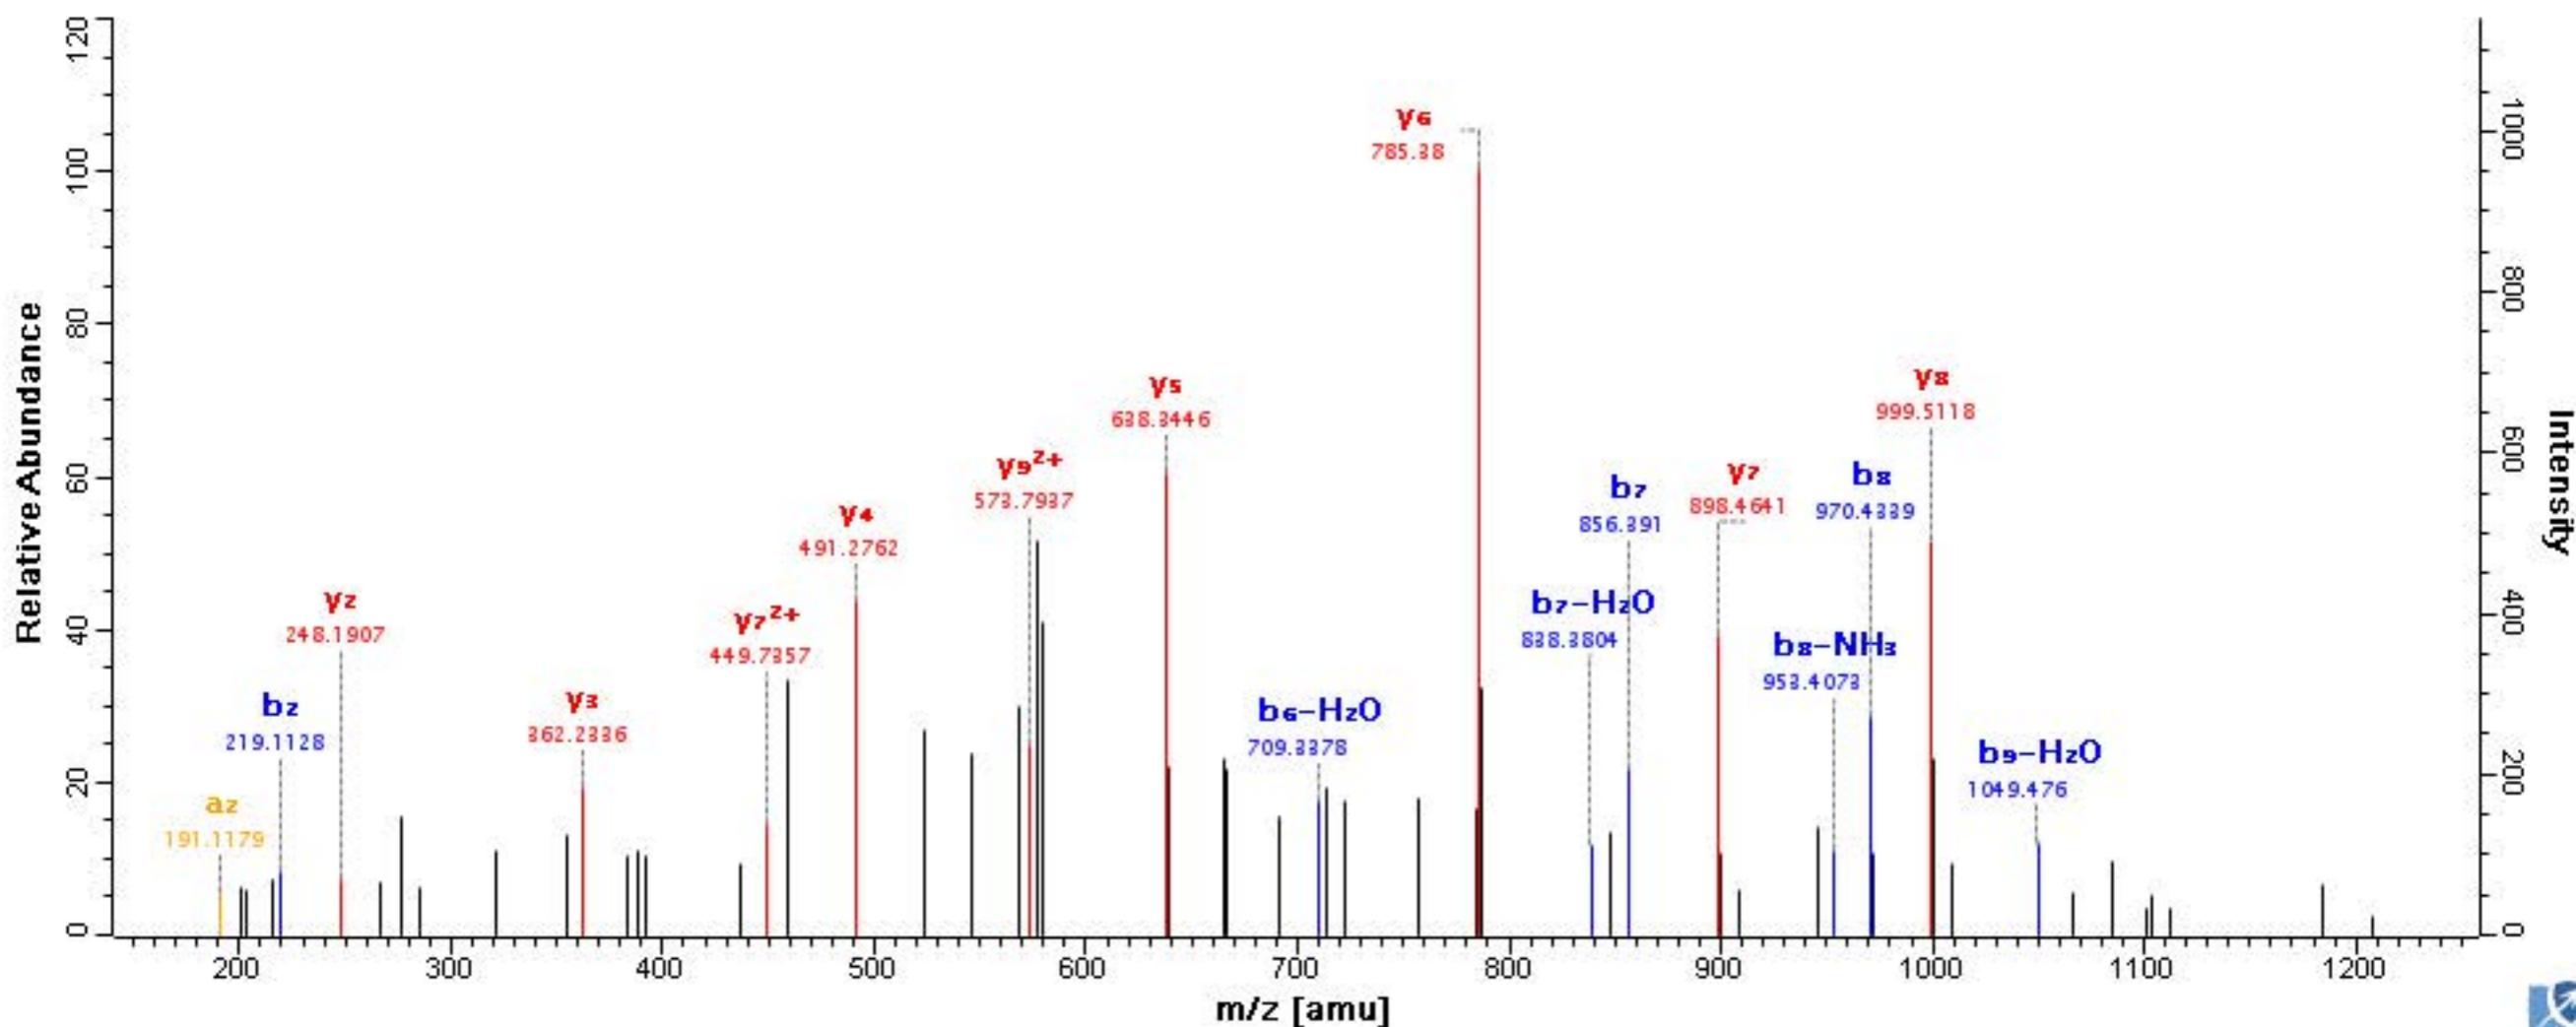

#### precursor information

|                   |                     |
|-------------------|---------------------|
| Mass:             | 1216.6113           |
| m/z:              | System.Collections. |
| Charge:           | System.Collections. |
| Retentiontime:    | System.Collections. |
| Score:            | 102.0672            |
| Mass Error [ppm]: | 1.0671              |
| PEP:              | 0.0030018           |
| Precursor Type:   | ISO                 |

#### general information

|                       |             |
|-----------------------|-------------|
| Annotation:           | 8 of 10     |
| AminoAcids Coverage:  | 80 %        |
| Intensity Coverage:   | 42 %        |
| Protein Localisation: | 219 ... 228 |

| a ion           |          | b ion           |          |    | seq |   | $\gamma$ ion    |           | $\gamma^2$ ion  |           |
|-----------------|----------|-----------------|----------|----|-----|---|-----------------|-----------|-----------------|-----------|
| $\Delta$ dalton | mass     | $\Delta$ dalton | mass     |    |     |   | $\Delta$ dalton | mass      | $\Delta$ dalton | mass      |
|                 | 44.04948 |                 | 72.04439 | 1  | A   | 9 |                 |           |                 |           |
| +0.06897        | 191.1179 | -0.067562       | 219.1128 | 2  | F   | 8 | 1146.58         |           | 573.7937        | -0.21645  |
|                 | 292.1656 |                 | 320.1605 | 3  | T   | 7 | 999.5118        | +0.075773 | 999.5118        |           |
|                 | 405.2496 |                 | 433.2445 | 4  | I   | 6 | 898.4641        | +0.071206 | 449.7357        | -0.430499 |
|                 | 552.285  |                 | 580.2799 | 5  | M   | 5 | 785.38          | -0.012272 | 785.38          |           |
|                 | 699.3534 |                 | 727.3484 | 6  | F   | 4 | 638.3446        | -0.008245 | 638.3446        |           |
|                 | 828.396  | +0.423439       | 856.391  | 7  | E   | 3 | 491.2762        | +0.00658  | 491.2762        |           |
|                 | 942.439  | +0.087787       | 970.4339 | 8  | N   | 2 | 362.2336        | +0.036844 | 362.2336        |           |
|                 | 1039.492 |                 | 1067.487 | 9  | P   | 1 | 248.1907        | +0.015471 | 248.1907        |           |
|                 |          |                 |          | 10 | K   | 0 | 151.1379        |           | 151.1379        |           |

Source: 20120419\_VR\_Bsu\_TripleSILAC\_T1L1T2rep\_OG\_F06  
 Scannumber: 20161  
 Protein: BSU35470; comF1; comFA  
 Peptide Score: 81.62  
 Method: ITMS; CID; 3

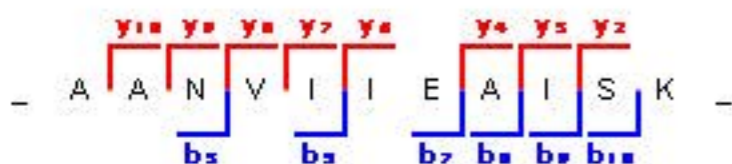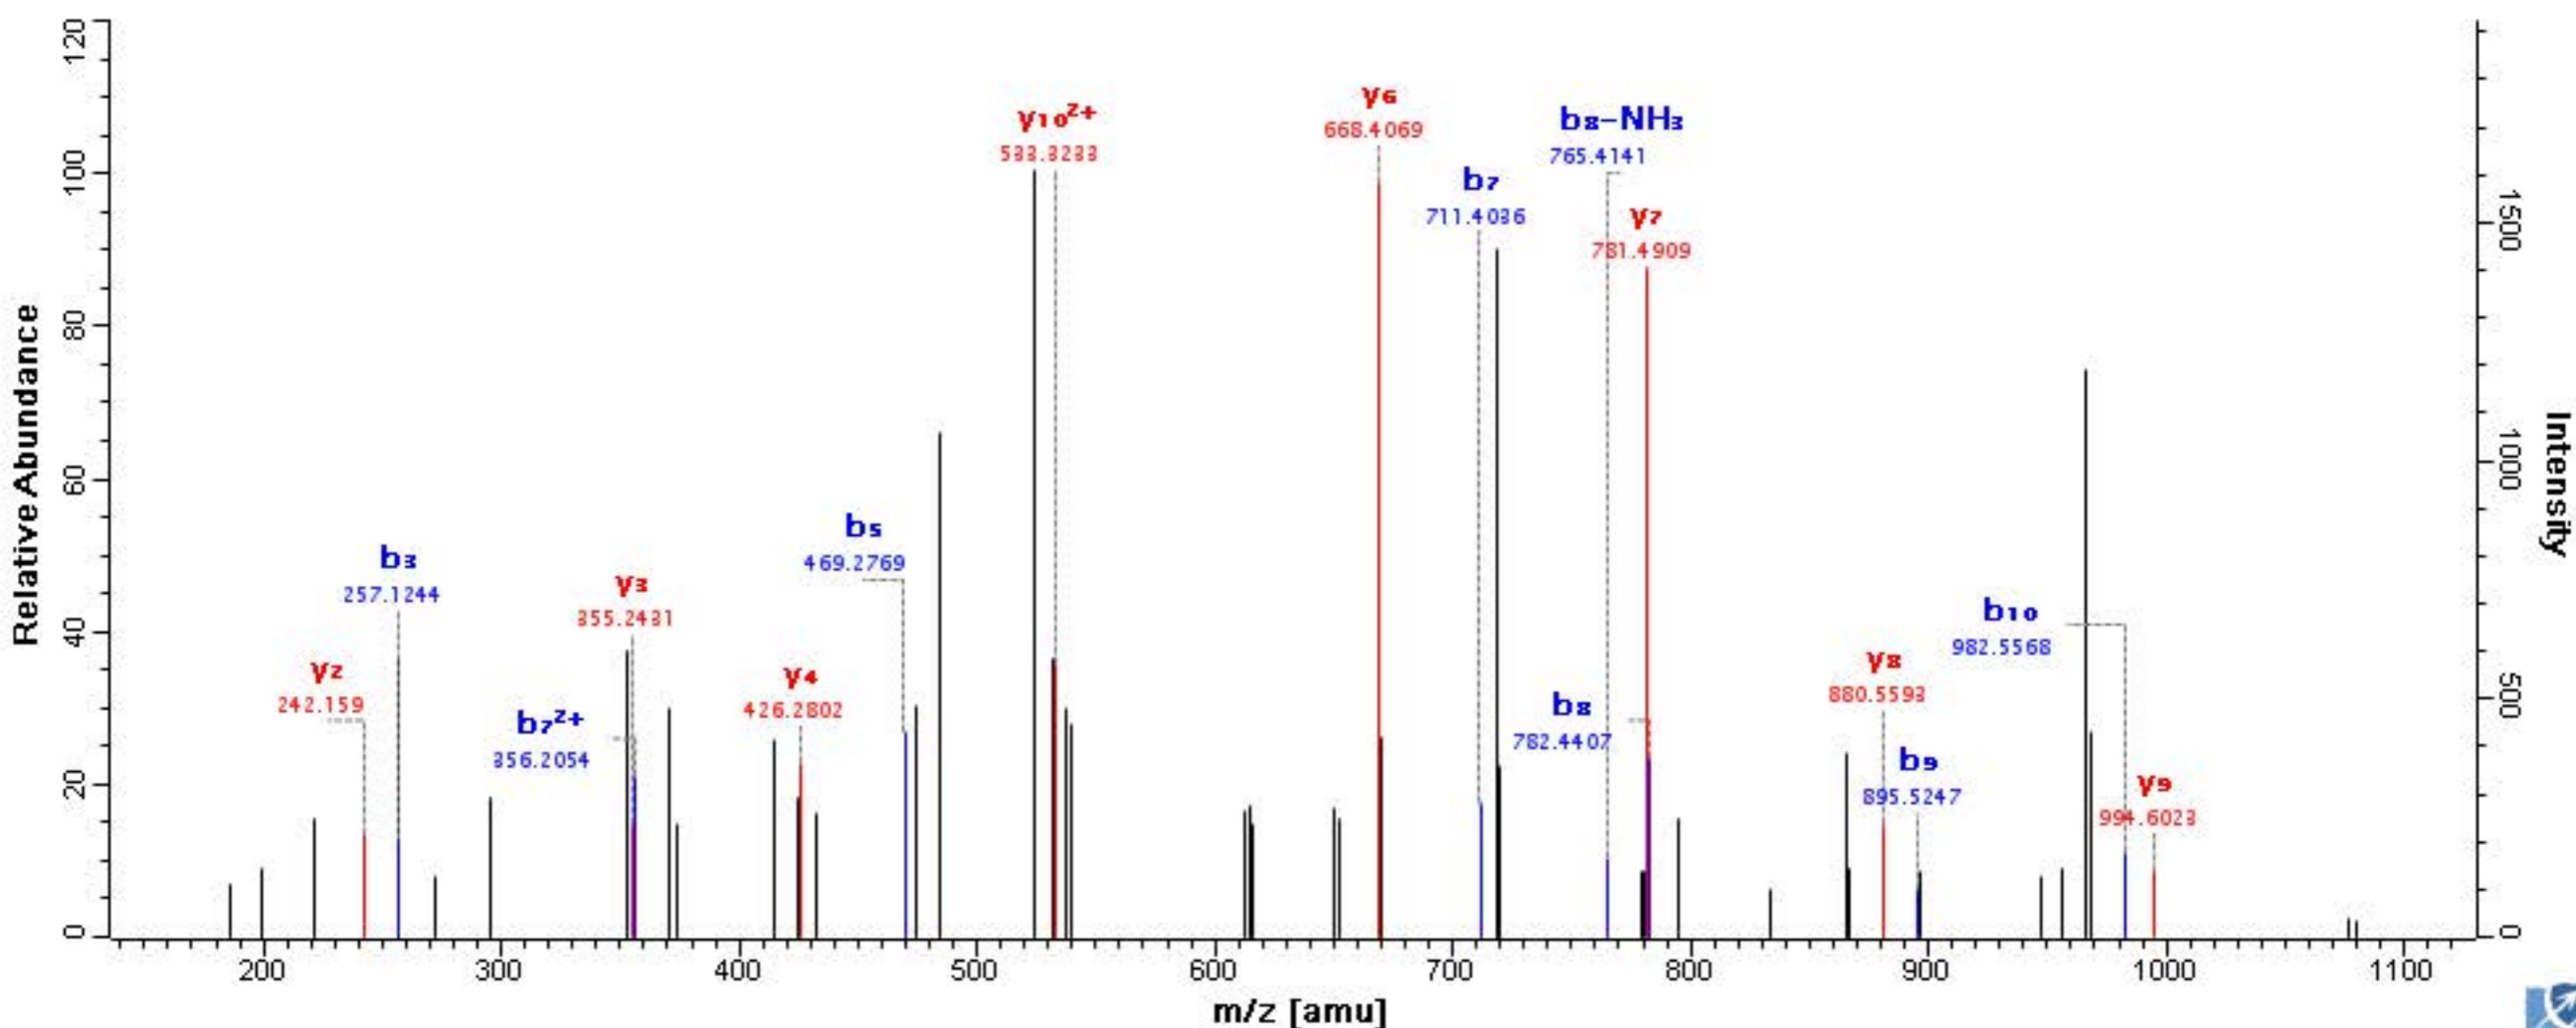

#### precursor information

|                   |                     |
|-------------------|---------------------|
| Mass:             | 1127.65452          |
| m/z:              | System.Collections. |
| Charge:           | System.Collections. |
| Retentiontime:    | System.Collections. |
| Score:            | 81.62486            |
| Mass Error [ppm]: | -0.44212            |
| PEP:              | 0.004045            |
| Precursor Type:   | MULTI               |

#### general information

|                       |             |
|-----------------------|-------------|
| Annotation:           | 9 of 11     |
| AminoAcids Coverag    | 82 %        |
| Intensity Coverage:   | 31 %        |
| Protein Localisation: | 128 ... 138 |

| b <sup>2+</sup> ion |          | b ion     |          |    | seq |    | γ ion    |           | γ <sup>2+</sup> ion |          |
|---------------------|----------|-----------|----------|----|-----|----|----------|-----------|---------------------|----------|
| Δ dalton            | mass     | Δ dalton  | mass     |    |     |    | Δ dalton | mass      | Δ dalton            | mass     |
|                     | 72.04439 |           | 72.04439 | 1  | A   | 10 |          |           |                     |          |
|                     | 143.0815 |           | 143.0815 | 2  | A   | 9  | 1065.639 |           | 533.3233            | +0.07944 |
|                     | 257.1244 | -0.006634 | 257.1244 | 3  | N   | 8  | 994.6023 | +0.027184 | 994.6023            |          |
|                     | 356.1928 |           | 356.1928 | 4  | V   | 7  | 880.5593 | +0.277631 | 880.5593            |          |
|                     | 469.2769 | +0.243659 | 469.2769 | 5  | I   | 6  | 781.4909 | +0.211462 | 781.4909            |          |
|                     | 582.361  |           | 582.361  | 6  | I   | 5  | 668.4069 | +0.115045 | 668.4069            |          |
| +0.128868           | 356.2054 | +0.157347 | 711.4036 | 7  | E   | 4  | 555.3228 |           | 555.3228            |          |
|                     | 782.4407 | +0.164544 | 782.4407 | 8  | A   | 3  | 426.2802 | +0.060489 | 426.2802            |          |
|                     | 895.5247 | +0.17716  | 895.5247 | 9  | I   | 2  | 355.2431 | +0.294319 | 355.2431            |          |
|                     | 982.5568 | +0.333242 | 982.5568 | 10 | S   | 1  | 242.159  | +0.218868 | 242.159             |          |
|                     |          |           |          | 11 | K   | 0  | 155.127  |           | 155.127             |          |

Source: 20120419\_VR\_Bsu\_TripleSILAC\_T1L1T2rep\_OG\_F08  
 Scannumber: 16393  
 Protein: BSU35710; tagG  
 Peptide Score: 117.09  
 Method: ITMS; CID; 3

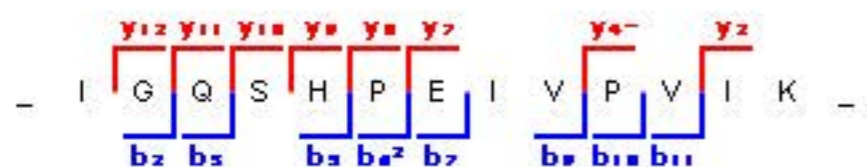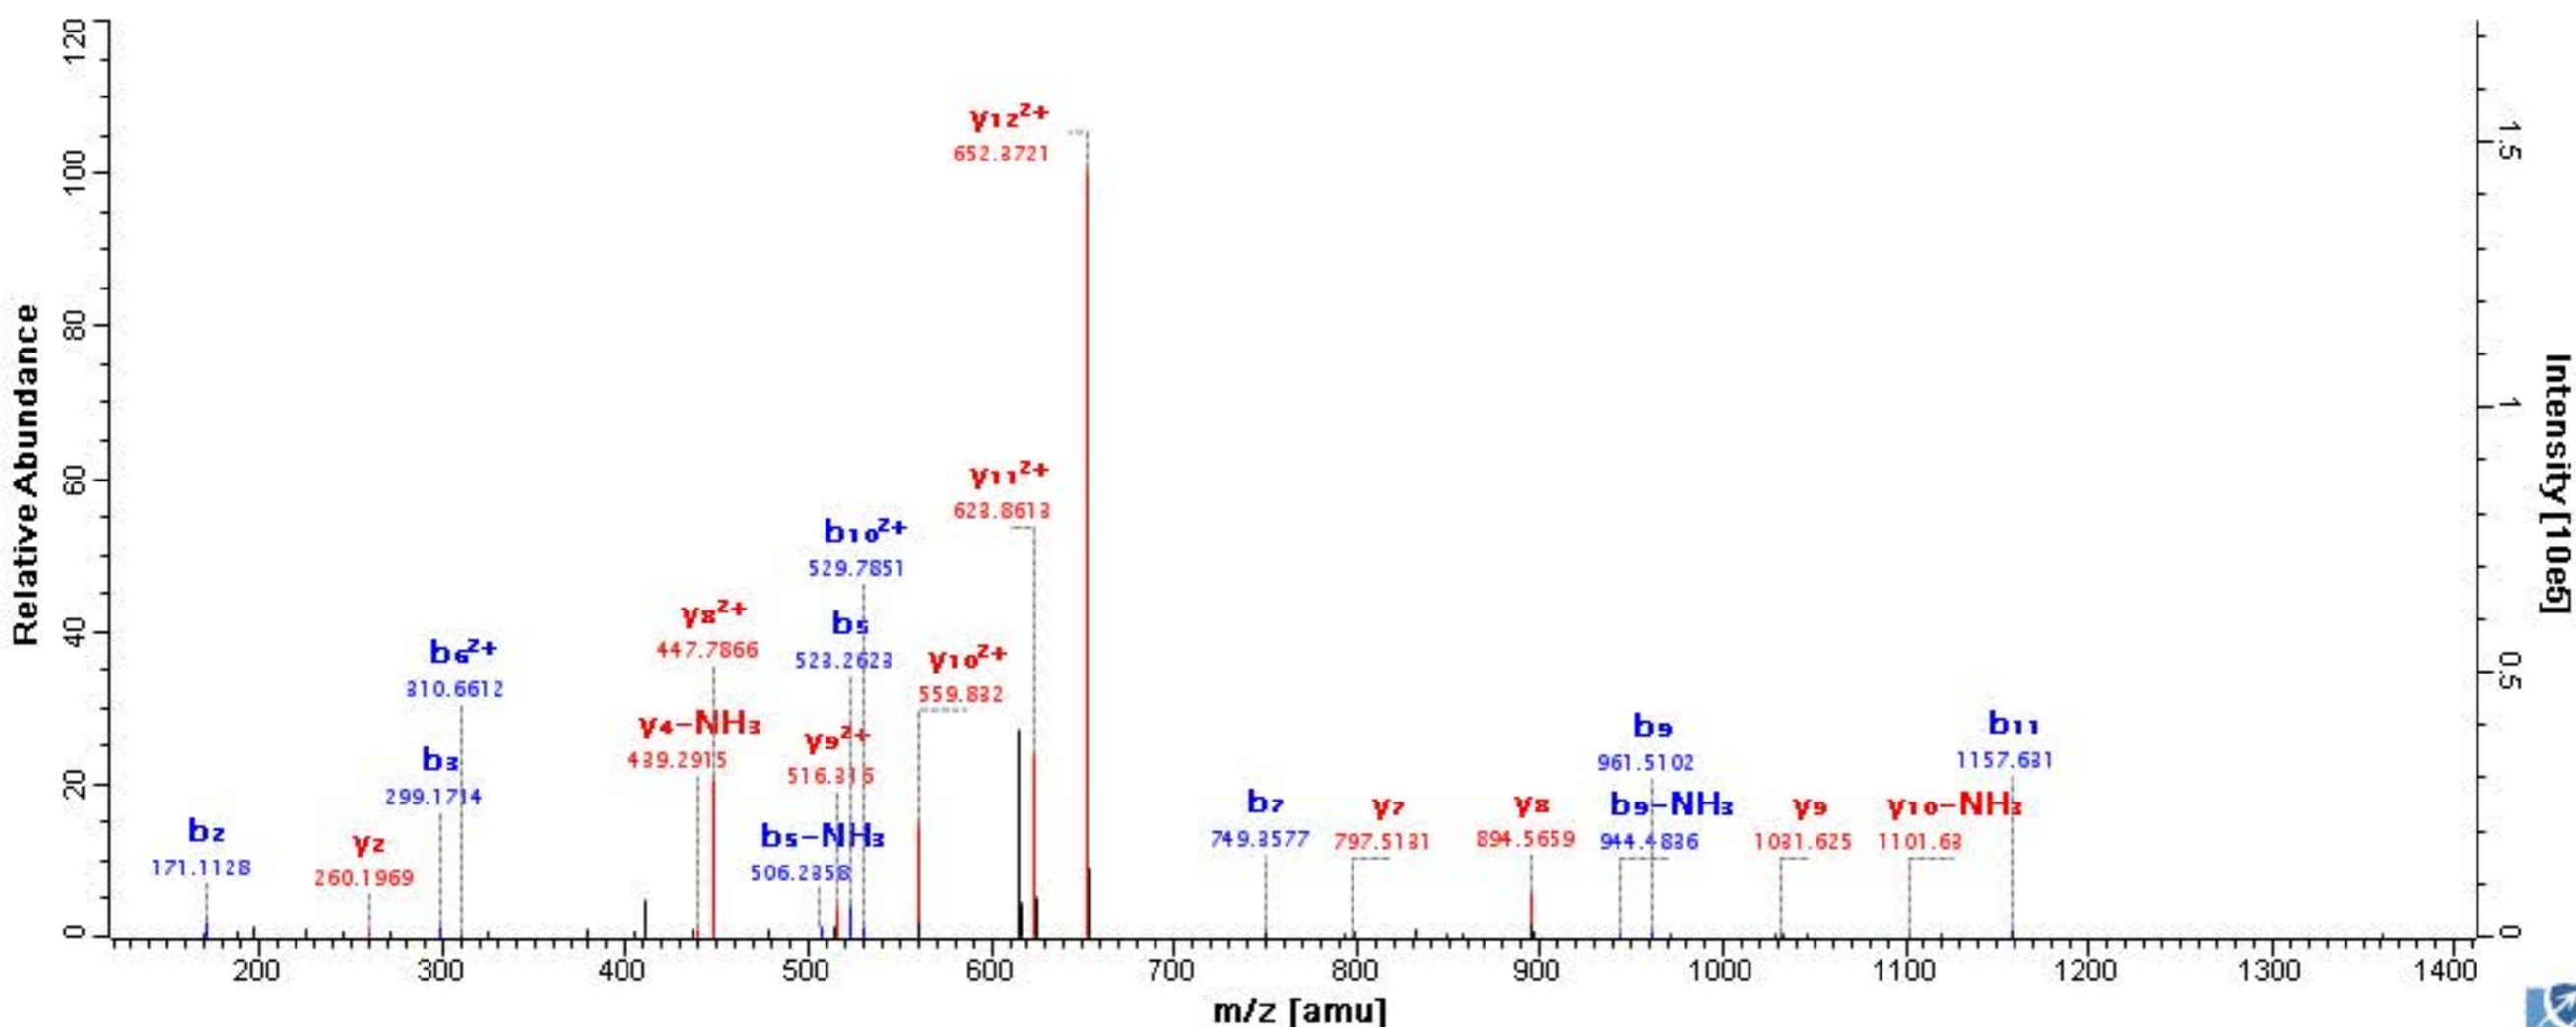

**precursor information**

|                   |                     |
|-------------------|---------------------|
| Mass:             | 1415.81339          |
| m/z:              | System.Collections. |
| Charge:           | System.Collections. |
| Retentiontime:    | System.Collections. |
| Score:            | 117.0911            |
| Mass Error [ppm]: | -0.18148            |
| PEP:              | 0.00034545          |
| Precursor Type:   | MULTI               |

**general information**

|                       |             |
|-----------------------|-------------|
| Annotation:           | 10 of 13    |
| AminoAcids Coverage:  | 77 %        |
| Intensity Coverage:   | 72 %        |
| Protein Localisation: | 206 ... 218 |

| b <sup>2+</sup> ion |          | b ion     |          |     | γ ion |          | γ <sup>2+</sup> ion |           |           |           |
|---------------------|----------|-----------|----------|-----|-------|----------|---------------------|-----------|-----------|-----------|
| Δ dalton            | mass     | Δ dalton  | mass     | seq |       | Δ dalton | mass                | Δ dalton  | mass      |           |
|                     | 114.0913 |           | 114.0913 | 1   | I     | 12       |                     |           |           |           |
|                     | 171.1128 | +0.182682 | 171.1128 | 2   | G     | 11       | 1303.737            | 652.3721  | +0.201539 |           |
|                     | 299.1714 | +0.082952 | 299.1714 | 3   | Q     | 10       | 1246.715            | 623.8613  | +0.154471 |           |
|                     | 386.2034 |           | 386.2034 | 4   | S     | 9        | 1118.657            | 559.832   | +0.222822 |           |
|                     | 523.2623 | +0.025947 | 523.2623 | 5   | H     | 8        | 1031.625            | +0.342981 | 516.316   | -0.001093 |
| -0.224963           | 310.6612 |           | 620.3151 | 6   | P     | 7        | 894.5659            | +0.090003 | 447.7866  | +0.220379 |
|                     | 749.3577 | +0.385241 | 749.3577 | 7   | E     | 6        | 797.5131            | -0.05871  | 797.5131  |           |
|                     | 862.4417 |           | 862.4417 | 8   | I     | 5        | 668.4705            |           | 668.4705  |           |
|                     | 961.5102 | +0.129003 | 961.5102 | 9   | V     | 4        | 555.3865            |           | 555.3865  |           |
| +0.475949           | 529.7851 |           | 1058.563 | 10  | P     | 3        | 456.318             |           | 456.318   |           |
|                     | 1157.631 | +0.269422 | 1157.631 | 11  | V     | 2        | 359.2653            |           | 359.2653  |           |
|                     | 1270.715 |           | 1270.715 | 12  | I     | 1        | 260.1969            | +0.067475 | 260.1969  |           |
|                     |          |           |          | 13  | K     | 0        | 147.1128            |           | 147.1128  |           |

Source: 20120419\_VR\_Bsu\_TripleSILAC\_T1L1T2rep\_OG\_F08  
 Scannumber: 18013  
 Protein: BSU20010; yojV; yosT  
 Peptide Score: 99.8  
 Method: ITMS; CID; 3

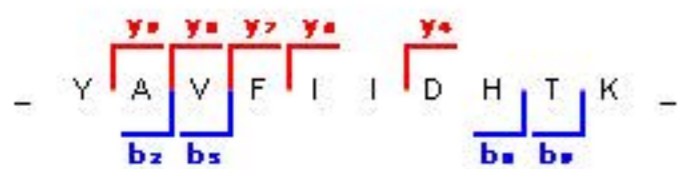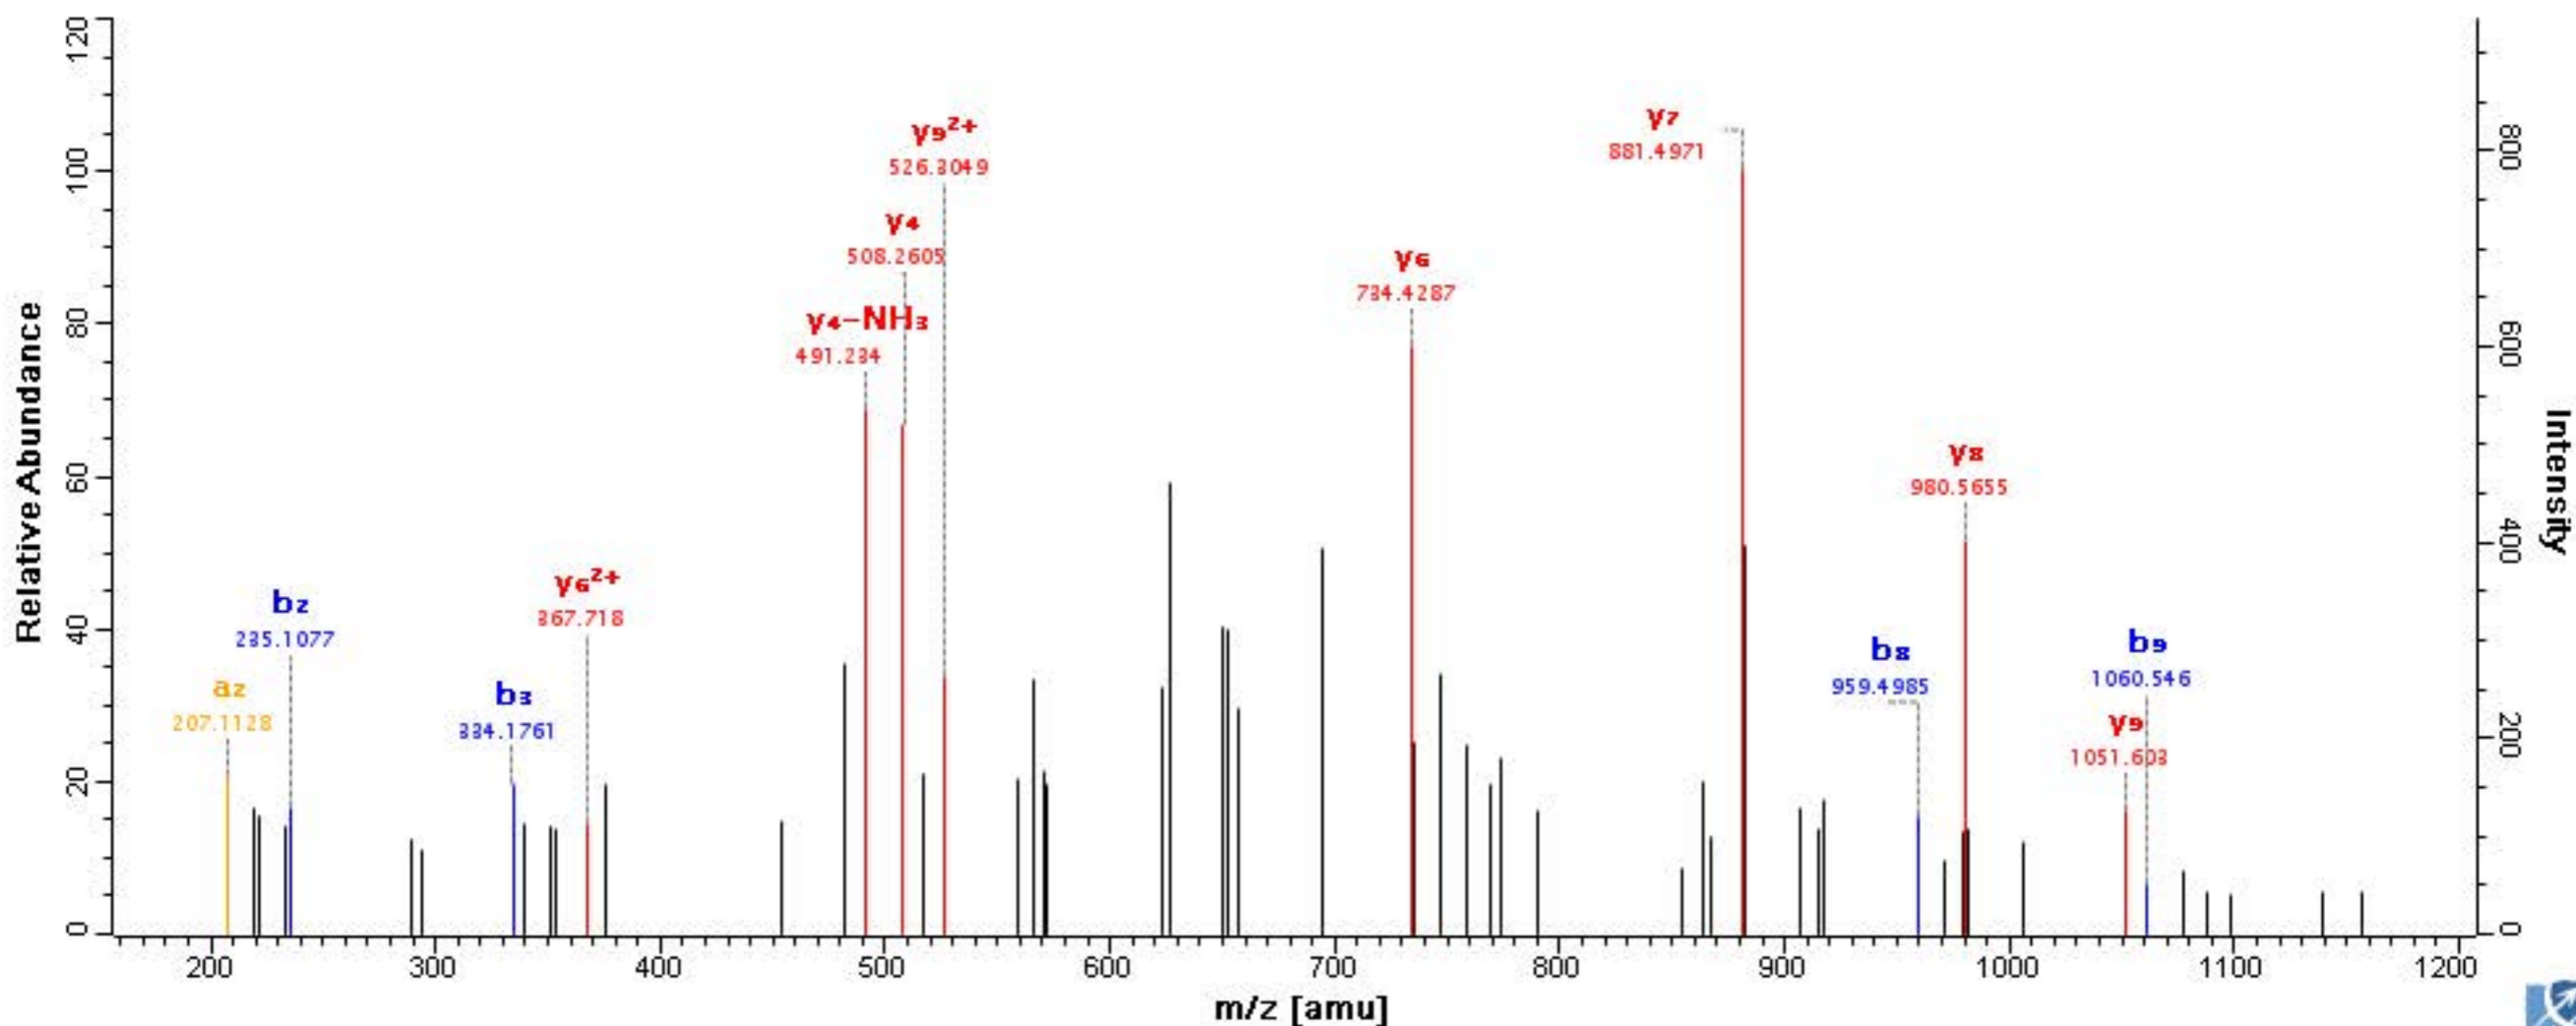

#### precursor information

|                   |                     |
|-------------------|---------------------|
| Mass:             | 1205.64539          |
| m/z:              | System.Collections. |
| Charge:           | System.Collections. |
| Retentiontime:    | System.Collections. |
| Score:            | 99.80212            |
| Mass Error [ppm]: | 0.76606             |
| PEP:              | 0.0022185           |
| Precursor Type:   | MULTI               |

#### general information

|                       |            |
|-----------------------|------------|
| Annotation:           | 7 of 10    |
| AminoAcids Coverage:  | 70 %       |
| Intensity Coverage:   | 36 %       |
| Protein Localisation: | 93 ... 102 |

| a ion     |          | b ion     |          | seq |   |   | γ ion    |           | γ <sup>2+</sup> ion |           |
|-----------|----------|-----------|----------|-----|---|---|----------|-----------|---------------------|-----------|
| Δ dalton  | mass     | Δ dalton  | mass     |     |   |   | Δ dalton | mass      | Δ dalton            | mass      |
|           | 136.0757 |           | 164.0706 | 1   | Y | 9 |          |           |                     |           |
| +0.242604 | 207.1128 | -0.066398 | 235.1077 | 2   | A | 8 | 1051.603 | +0.179743 | 526.3049            | +0.318045 |
|           | 306.1812 | +0.290634 | 334.1761 | 3   | V | 7 | 980.5655 | +0.073851 | 980.5655            |           |
|           | 453.2496 |           | 481.2445 | 4   | F | 6 | 881.4971 | +0.058647 | 881.4971            |           |
|           | 566.3337 |           | 594.3286 | 5   | I | 5 | 734.4287 | +0.27794  | 367.718             | +0.24727  |
|           | 679.4178 |           | 707.4127 | 6   | I | 4 | 621.3446 |           | 621.3446            |           |
|           | 794.4447 |           | 822.4396 | 7   | D | 3 | 508.2605 | -0.121681 | 508.2605            |           |
|           | 931.5036 | +0.067083 | 959.4985 | 8   | H | 2 | 393.2336 |           | 393.2336            |           |
|           | 1032.551 | +0.260555 | 1060.546 | 9   | T | 1 | 256.1747 |           | 256.1747            |           |
|           |          |           |          | 10  | K | 0 | 155.127  |           | 155.127             |           |

Source: 20120419\_VR\_Bsu\_TripleSILAC\_T1L1T2rep\_OG\_F11  
 Scannumber: 19621  
 Protein: BSU22350; dnaD  
 Peptide Score: 149.82  
 Method: ITMS; CID; 3

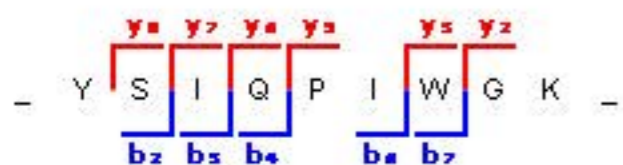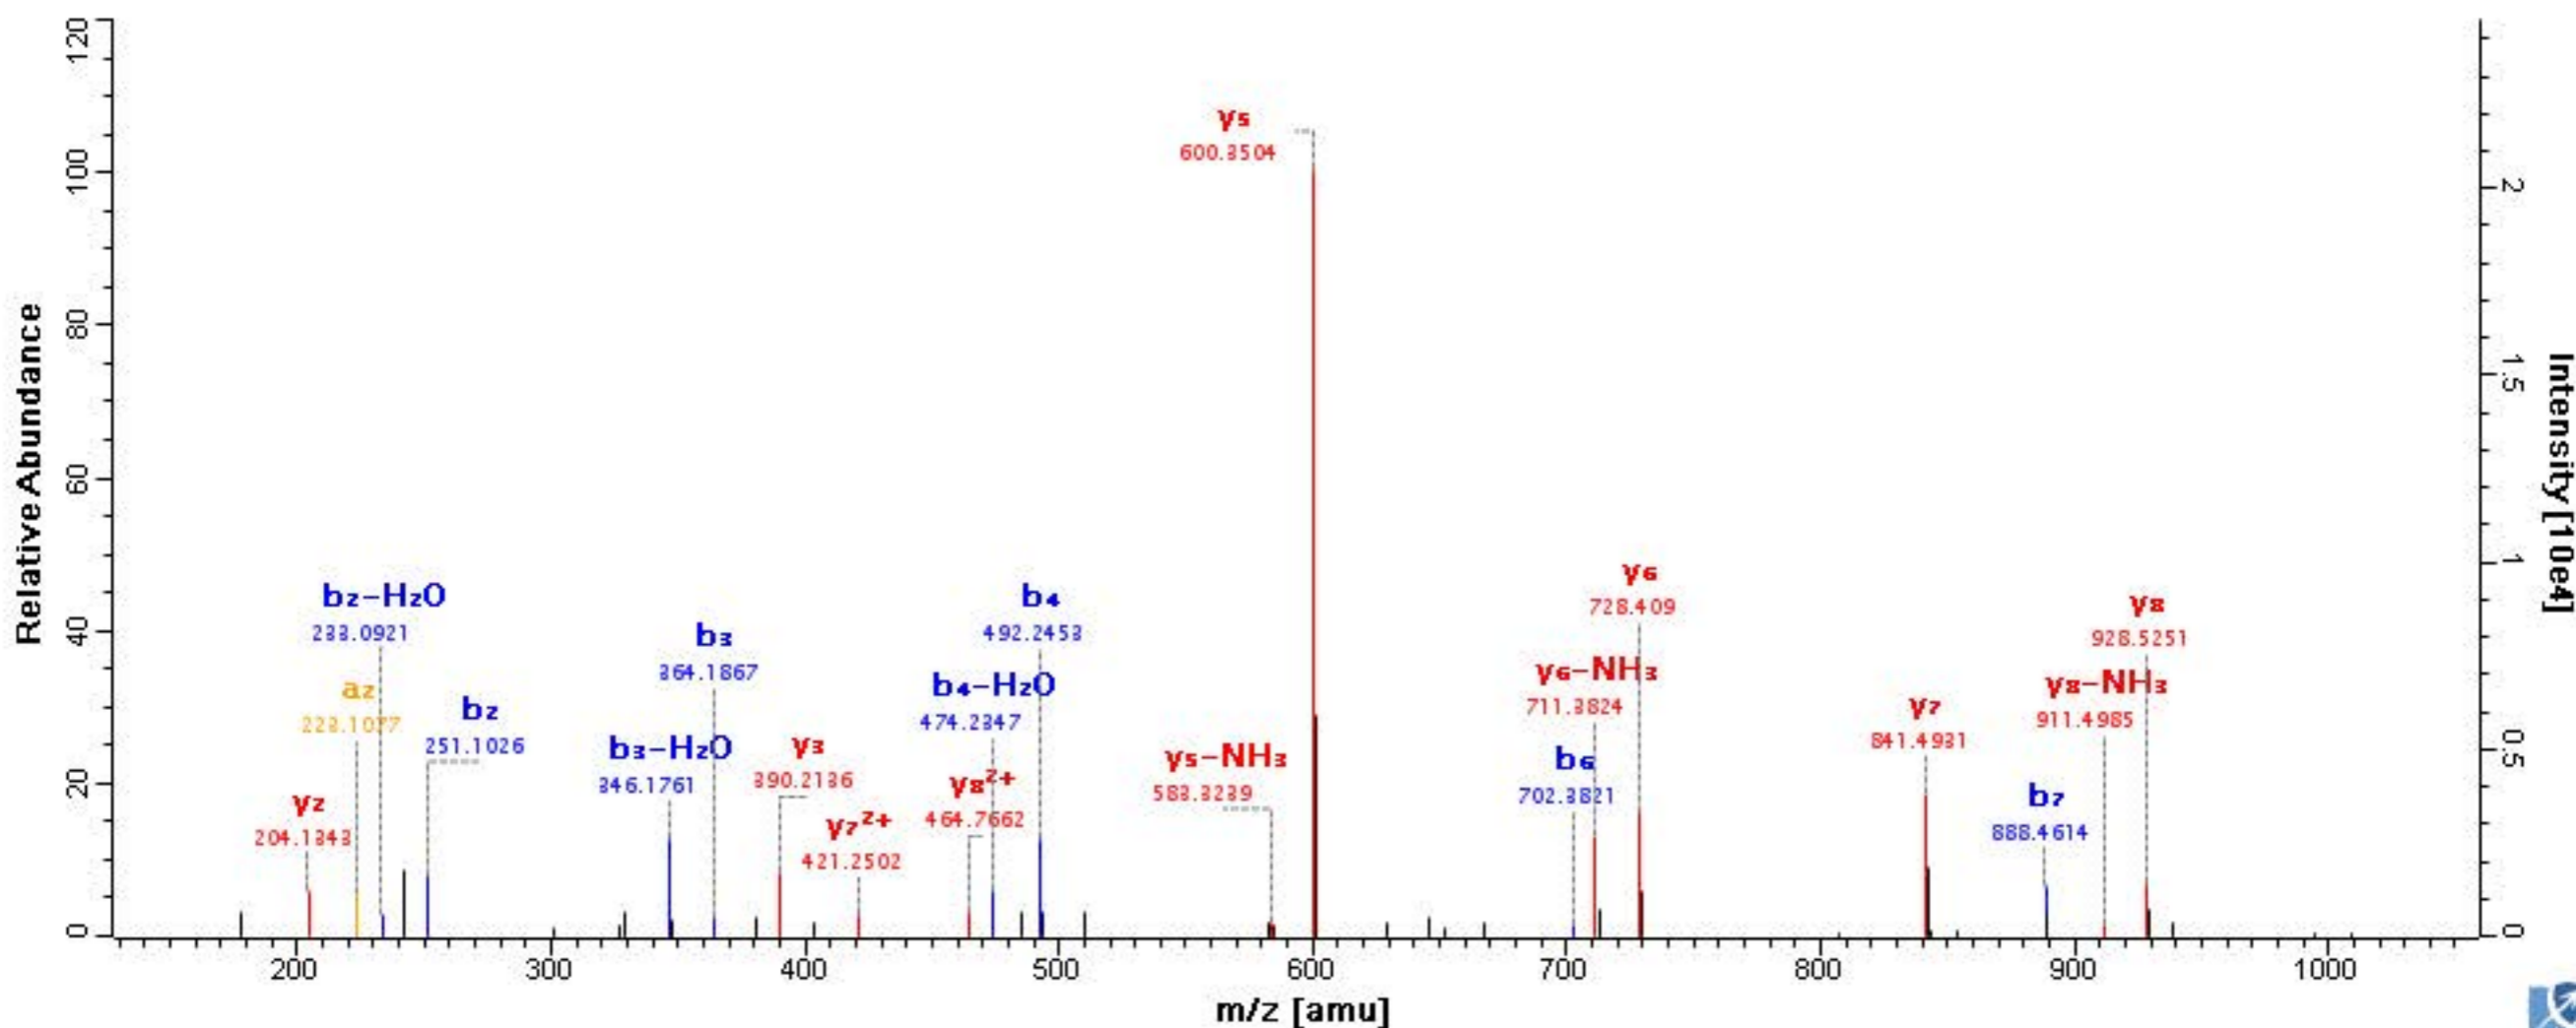

#### precursor information

|                       |                     |
|-----------------------|---------------------|
| Mass:                 | 1090.58107          |
| m/z:                  | System.Collections. |
| Charge:               | System.Collections. |
| Retentiontime:        | System.Collections. |
| Score:                | 149.816             |
| Mass Error [ppm]:     | -0.054867           |
| PEP:                  | 6.898E-11           |
| g Precursor Type:     | MULTI               |
| Annotation:           | 7 of 9              |
| AminoAcids Coverag    | 78 %                |
| Intensity Coverage:   | 70 %                |
| Protein Localisation: | 97 ... 105          |

| a ion    |          | b ion     |          | seq |   |   | y ion    |           | y <sup>2+</sup> ion |           |
|----------|----------|-----------|----------|-----|---|---|----------|-----------|---------------------|-----------|
| Δ dalton | mass     | Δ dalton  | mass     |     |   |   | Δ dalton | mass      | Δ dalton            | mass      |
|          | 136.0757 |           | 164.0706 | 1   | Y | 8 |          |           |                     |           |
| +0.13633 | 223.1077 | -0.034854 | 251.1026 | 2   | S | 7 | 928.5251 | +0.029426 | 464.7662            | -0.380496 |
|          | 336.1918 | +0.131937 | 364.1867 | 3   | I | 6 | 841.4931 | +0.009574 | 421.2502            | +0.056538 |
|          | 464.2504 | -0.011632 | 492.2453 | 4   | Q | 5 | 728.409  | +0.013133 | 728.409             |           |
|          | 561.3031 |           | 589.298  | 5   | P | 4 | 600.3504 | +0.064875 | 600.3504            |           |
|          | 674.3872 | +0.34391  | 702.3821 | 6   | I | 3 | 503.2976 |           | 503.2976            |           |
|          | 860.4665 | +0.151866 | 888.4614 | 7   | W | 2 | 390.2136 | +0.113781 | 390.2136            |           |
|          | 917.488  |           | 945.4829 | 8   | G | 1 | 204.1343 | +0.137216 | 204.1343            |           |
|          |          |           |          | 9   | K | 0 | 147.1128 |           | 147.1128            |           |

Source: 20120419\_VR\_Bsu\_TripleSILAC\_T1L1T2rep\_OG\_F12  
 Scannumber: 17197  
 Protein: BSU19080; yobT  
 Peptide Score: 173.37  
 Method: ITMS; CID; 3

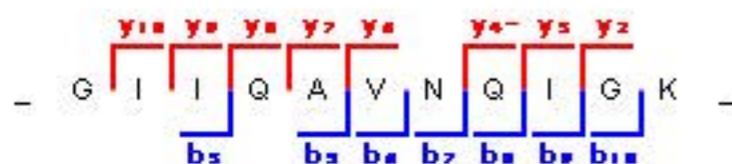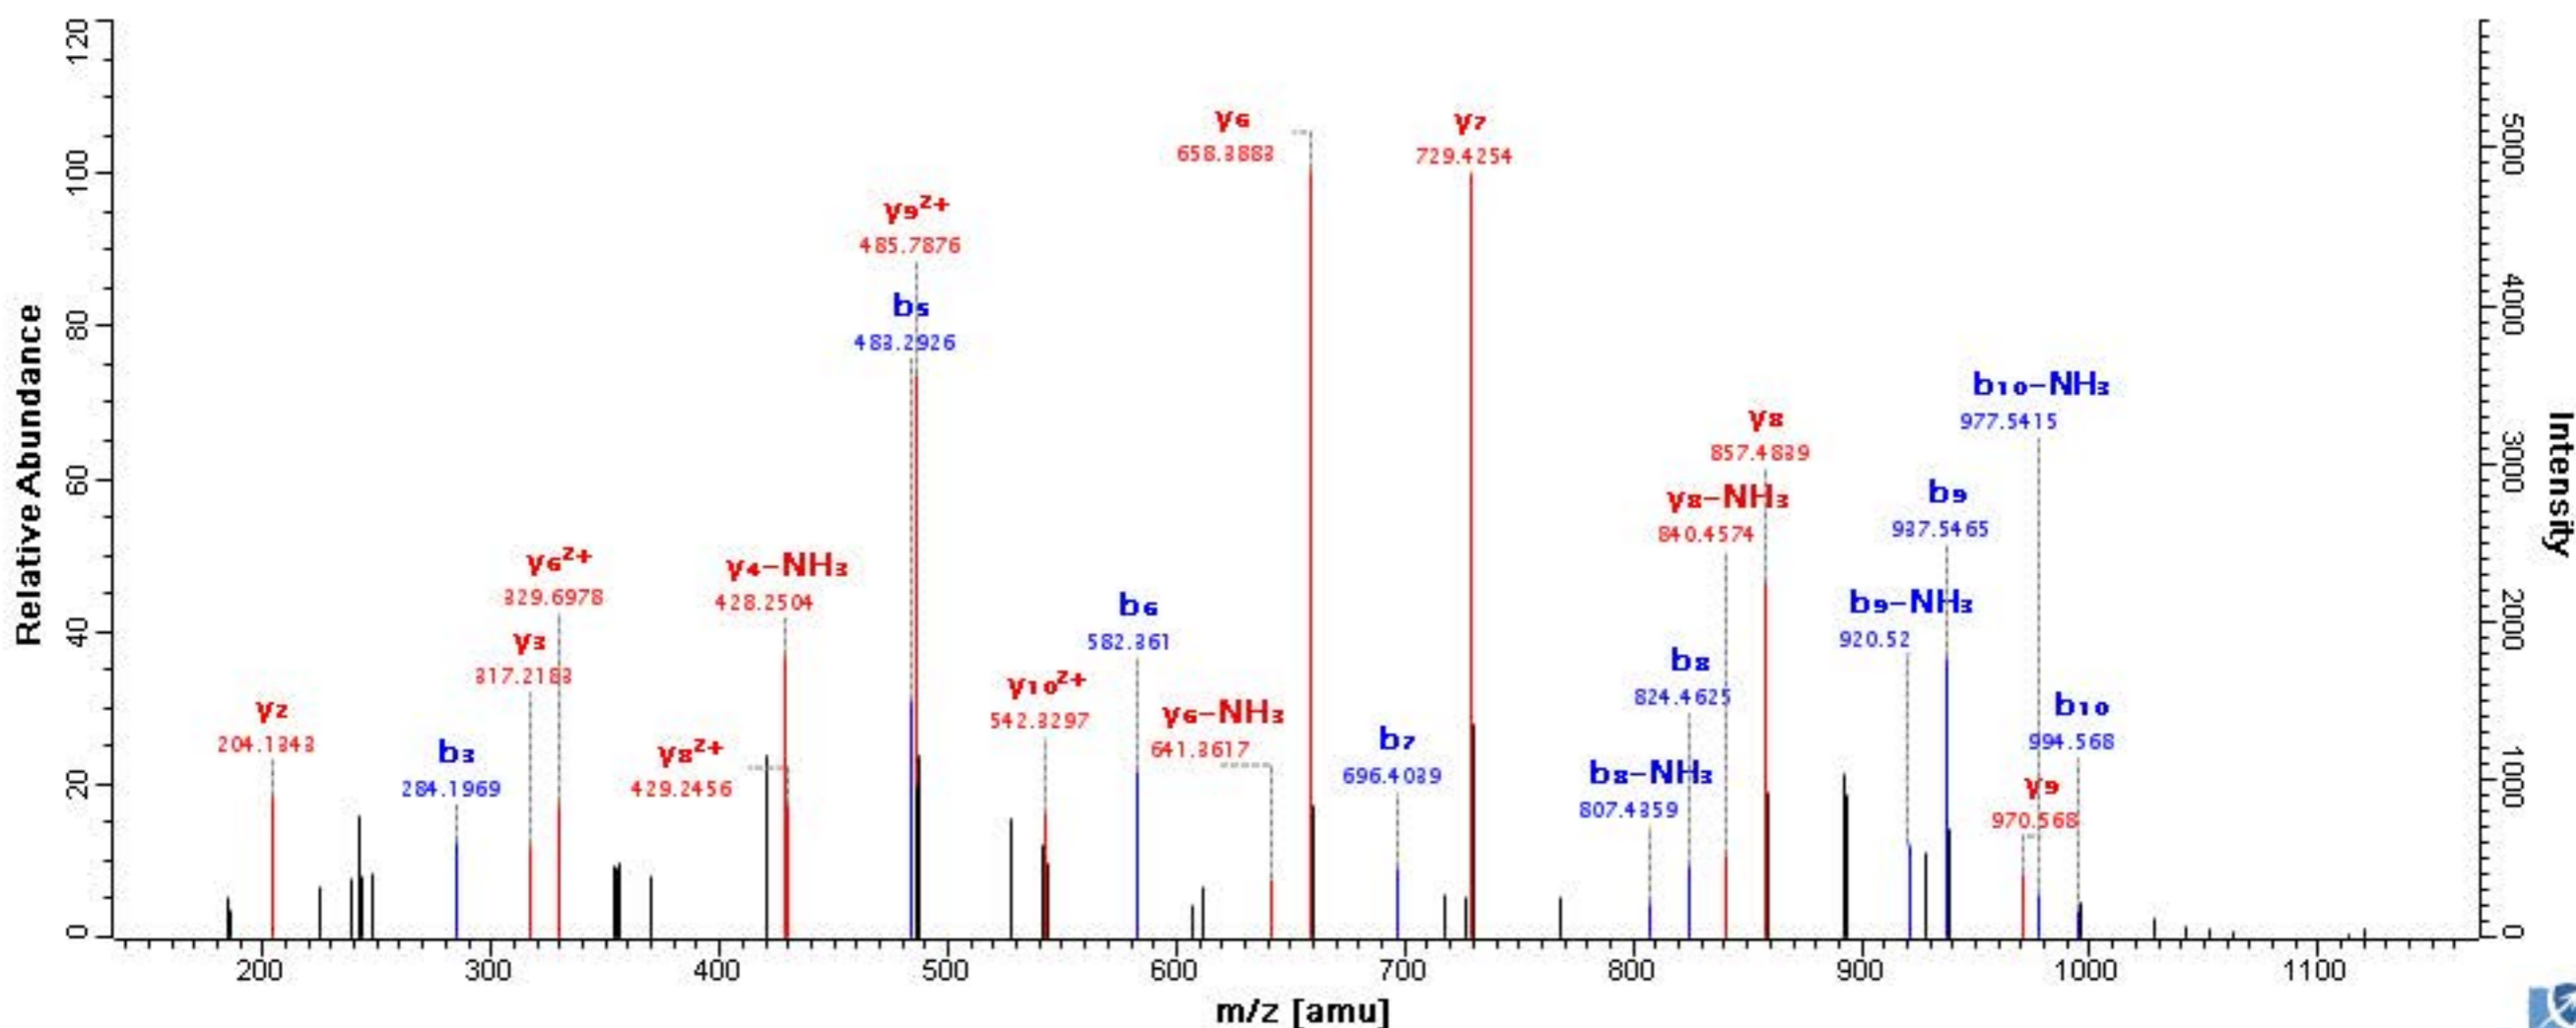

**precursor information**

|                   |                     |
|-------------------|---------------------|
| Mass:             | 1139.66692          |
| m/z:              | System.Collections. |
| Charge:           | System.Collections. |
| Retentiontime:    | System.Collections. |
| Score:            | 173.3714            |
| Mass Error [ppm]: | 0.58051             |
| PEP:              | 3.8595E-24          |
| Precursor Type:   | MULTI               |

**general information**

|                       |           |
|-----------------------|-----------|
| Annotation:           | 9 of 11   |
| AminoAcids Coverage:  | 82 %      |
| Intensity Coverage:   | 63 %      |
| Protein Localisation: | 45 ... 55 |

| b ion      |              |    |     |    | y ion        |            | y <sup>2+</sup> ion |            |
|------------|--------------|----|-----|----|--------------|------------|---------------------|------------|
| Δ dalton   | mass         |    | seq |    | Δ dalton     | mass       | Δ dalton            | mass       |
|            | 58.02874019  | 1  | G   | 10 |              |            |                     |            |
|            | 171.11280417 | 2  | I   | 9  | 1083.65207   |            | 542.32967324        | +0.0959859 |
| +0.1660164 | 284.19686815 | 3  | I   | 8  | 970.56800603 | +0.1503167 | 485.78764125        | +0.0239432 |
|            | 412.25544566 | 4  | Q   | 7  | 857.48394205 | +0.0963192 | 429.24560926        | -0.0020179 |
| +0.012067  | 483.29255945 | 5  | A   | 6  | 729.42536454 | +0.0813493 | 729.42536454        |            |
| +0.0310554 | 582.36097337 | 6  | V   | 5  | 658.38825075 | +0.0976501 | 329.69776361        | -0.4320776 |
| +0.2475884 | 696.40390081 | 7  | N   | 4  | 559.31983683 |            | 559.31983683        |            |
| +0.1575168 | 824.46247832 | 8  | Q   | 3  | 445.27690939 |            | 445.27690939        |            |
| +0.1114167 | 937.54654231 | 9  | I   | 2  | 317.21833187 | +0.039328  | 317.21833187        |            |
| +0.2530389 | 994.56800603 | 10 | G   | 1  | 204.13426789 | -0.0093137 | 204.13426789        |            |
|            |              | 11 | K   | 0  | 147.11280417 |            | 147.11280417        |            |



Source: 201 20420\_VR\_Bsu\_TripleSILAC\_L2ESLRep\_OG\_F02  
 Scannumber: 25582  
 Protein: BSU31500; yugD; yuxK  
 Peptide Score: 50.36  
 Method: ITMS; CID; 3

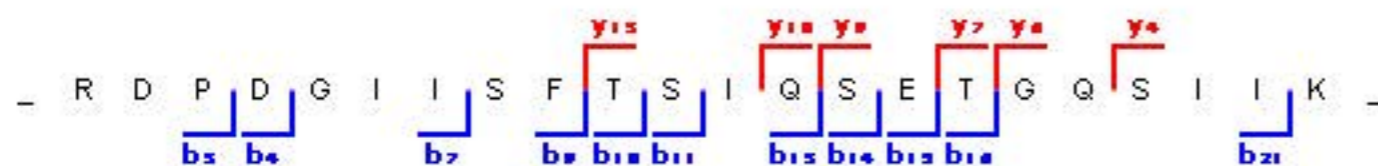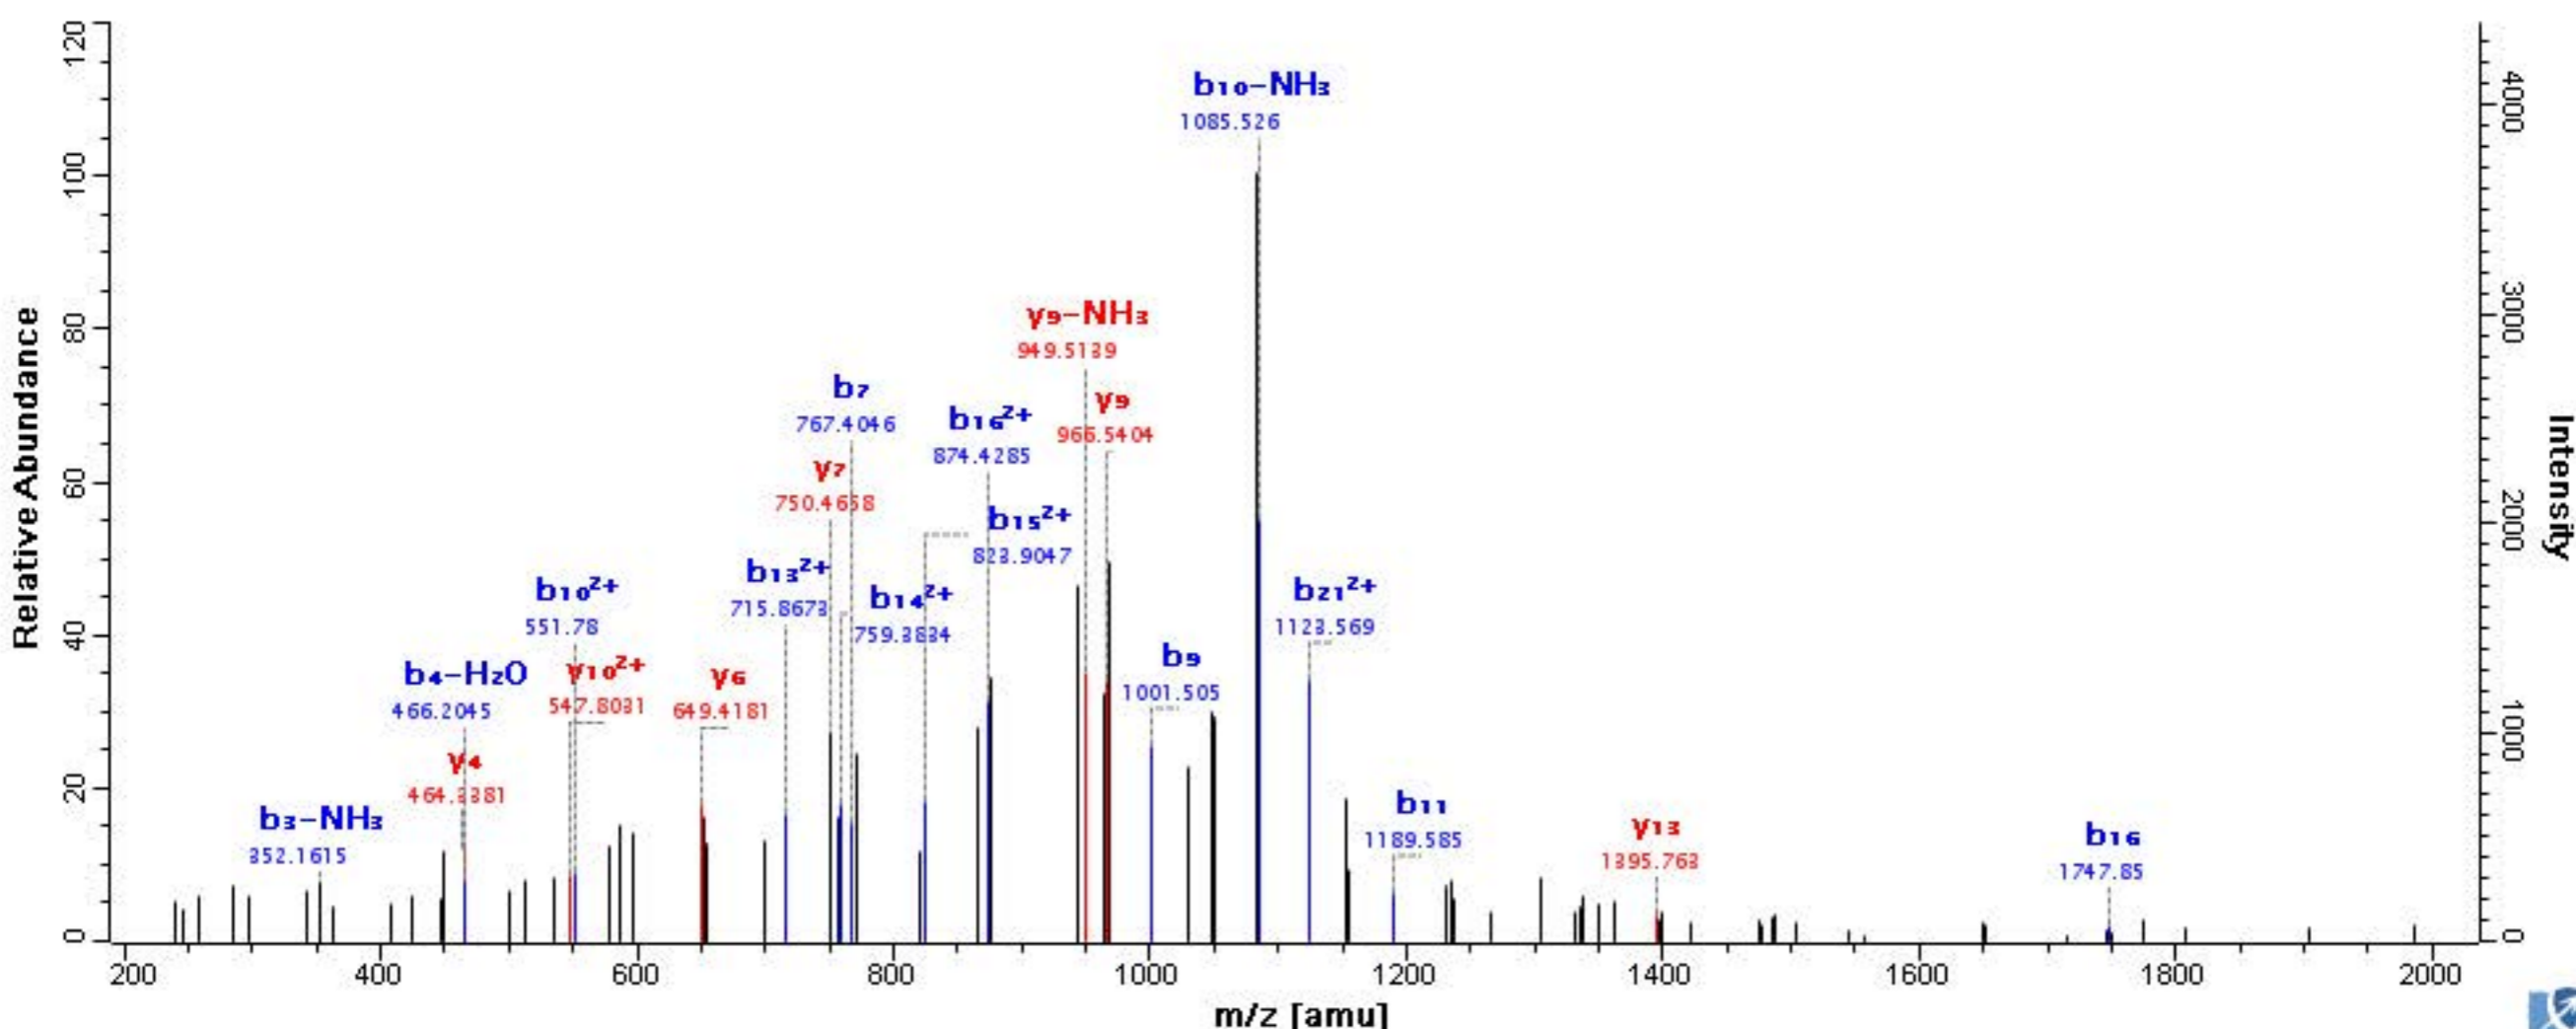

#### precursor information

|                   |                     |
|-------------------|---------------------|
| Mass:             | 2391.22987          |
| m/z:              | System.Collections. |
| Charge:           | System.Collections. |
| Retentiontime:    | System.Collections. |
| Score:            | 50.35817            |
| Mass Error [ppm]: | 0.71048             |
| PEP:              | 0.002555            |
| Precursor Type:   | MULTI               |

| b <sup>2+</sup> ion |          | b ion     |          |     | γ ion |          | γ <sup>2+</sup> ion |           |          |
|---------------------|----------|-----------|----------|-----|-------|----------|---------------------|-----------|----------|
| Δ dalton            | mass     | Δ dalton  | mass     | seq |       | Δ dalton | mass                | Δ dalton  | mass     |
|                     | 157.1084 |           | 157.1084 | 1   | R     | 21       |                     |           |          |
|                     | 272.1353 |           | 272.1353 | 2   | D     | 20       | 2240.159            |           | 2240.159 |
|                     | 369.1881 |           | 369.1881 | 3   | P     | 19       | 2125.132            |           | 2125.132 |
|                     | 484.215  |           | 484.215  | 4   | D     | 18       | 2028.08             |           | 2028.08  |
|                     | 541.2365 |           | 541.2365 | 5   | G     | 17       | 1913.053            |           | 1913.053 |
|                     | 654.3206 |           | 654.3206 | 6   | I     | 16       | 1856.031            |           | 1856.031 |
|                     | 767.4046 | +0.138828 | 767.4046 | 7   | I     | 15       | 1742.947            |           | 1742.947 |
|                     | 854.4367 |           | 854.4367 | 8   | S     | 14       | 1629.863            |           | 1629.863 |
|                     | 1001.505 | +0.170954 | 1001.505 | 9   | F     | 13       | 1542.831            |           | 1542.831 |
| -0.02983            | 551.78   |           | 1102.553 | 10  | T     | 12       | 1395.763            | +0.354064 | 1395.763 |
|                     | 1189.585 | +0.115783 | 1189.585 | 11  | S     | 11       | 1294.715            |           | 1294.715 |
|                     | 1302.669 |           | 1302.669 | 12  | I     | 10       | 1207.683            |           | 1207.683 |
| +0.441978           | 715.8673 |           | 1430.727 | 13  | Q     | 9        | 1094.599            |           | 547.8031 |
| +0.355224           | 759.3834 |           | 1517.759 | 14  | S     | 8        | 966.5404            | +0.09277  | 966.5404 |
| -0.199154           | 823.9047 |           | 1646.802 | 15  | E     | 7        | 879.5084            |           | 879.5084 |
| +0.018218           | 874.4285 | +0.29945  | 1747.85  | 16  | T     | 6        | 750.4658            | -0.013151 | 750.4658 |
|                     | 1804.871 |           | 1804.871 | 17  | G     | 5        | 649.4181            | +0.122113 | 649.4181 |
|                     | 1932.93  |           | 1932.93  | 18  | Q     | 4        | 592.3966            |           | 592.3966 |
|                     | 2019.962 |           | 2019.962 | 19  | S     | 3        | 464.3381            | +0.107001 | 464.3381 |
|                     | 2133.046 |           | 2133.046 | 20  | I     | 2        | 377.306             |           | 377.306  |
| +0.088141           | 1123.569 |           | 2246.13  | 21  | I     | 1        | 264.222             |           | 264.222  |
|                     |          |           |          | 22  | K     | 0        | 151.1379            |           | 151.1379 |

#### general information

|                       |           |
|-----------------------|-----------|
| Annotation:           | 14 of 22  |
| AminoAcids Coverag    | 64%       |
| Intensity Coverage:   | 32%       |
| Protein Localisation: | 30 ... 51 |

Source: 20120420\_VR\_Bsu\_TripleSILAC\_L2ESLRep\_OG\_F05  
 Scannumber: 22864  
 Protein: arsR; BSU25810; yqj  
 Peptide Score: 118.18  
 Method: ITMS; CID; 3

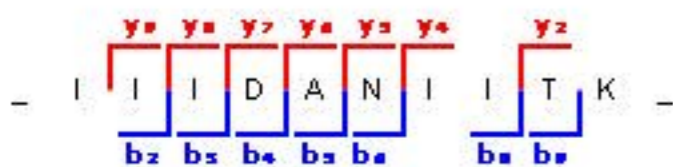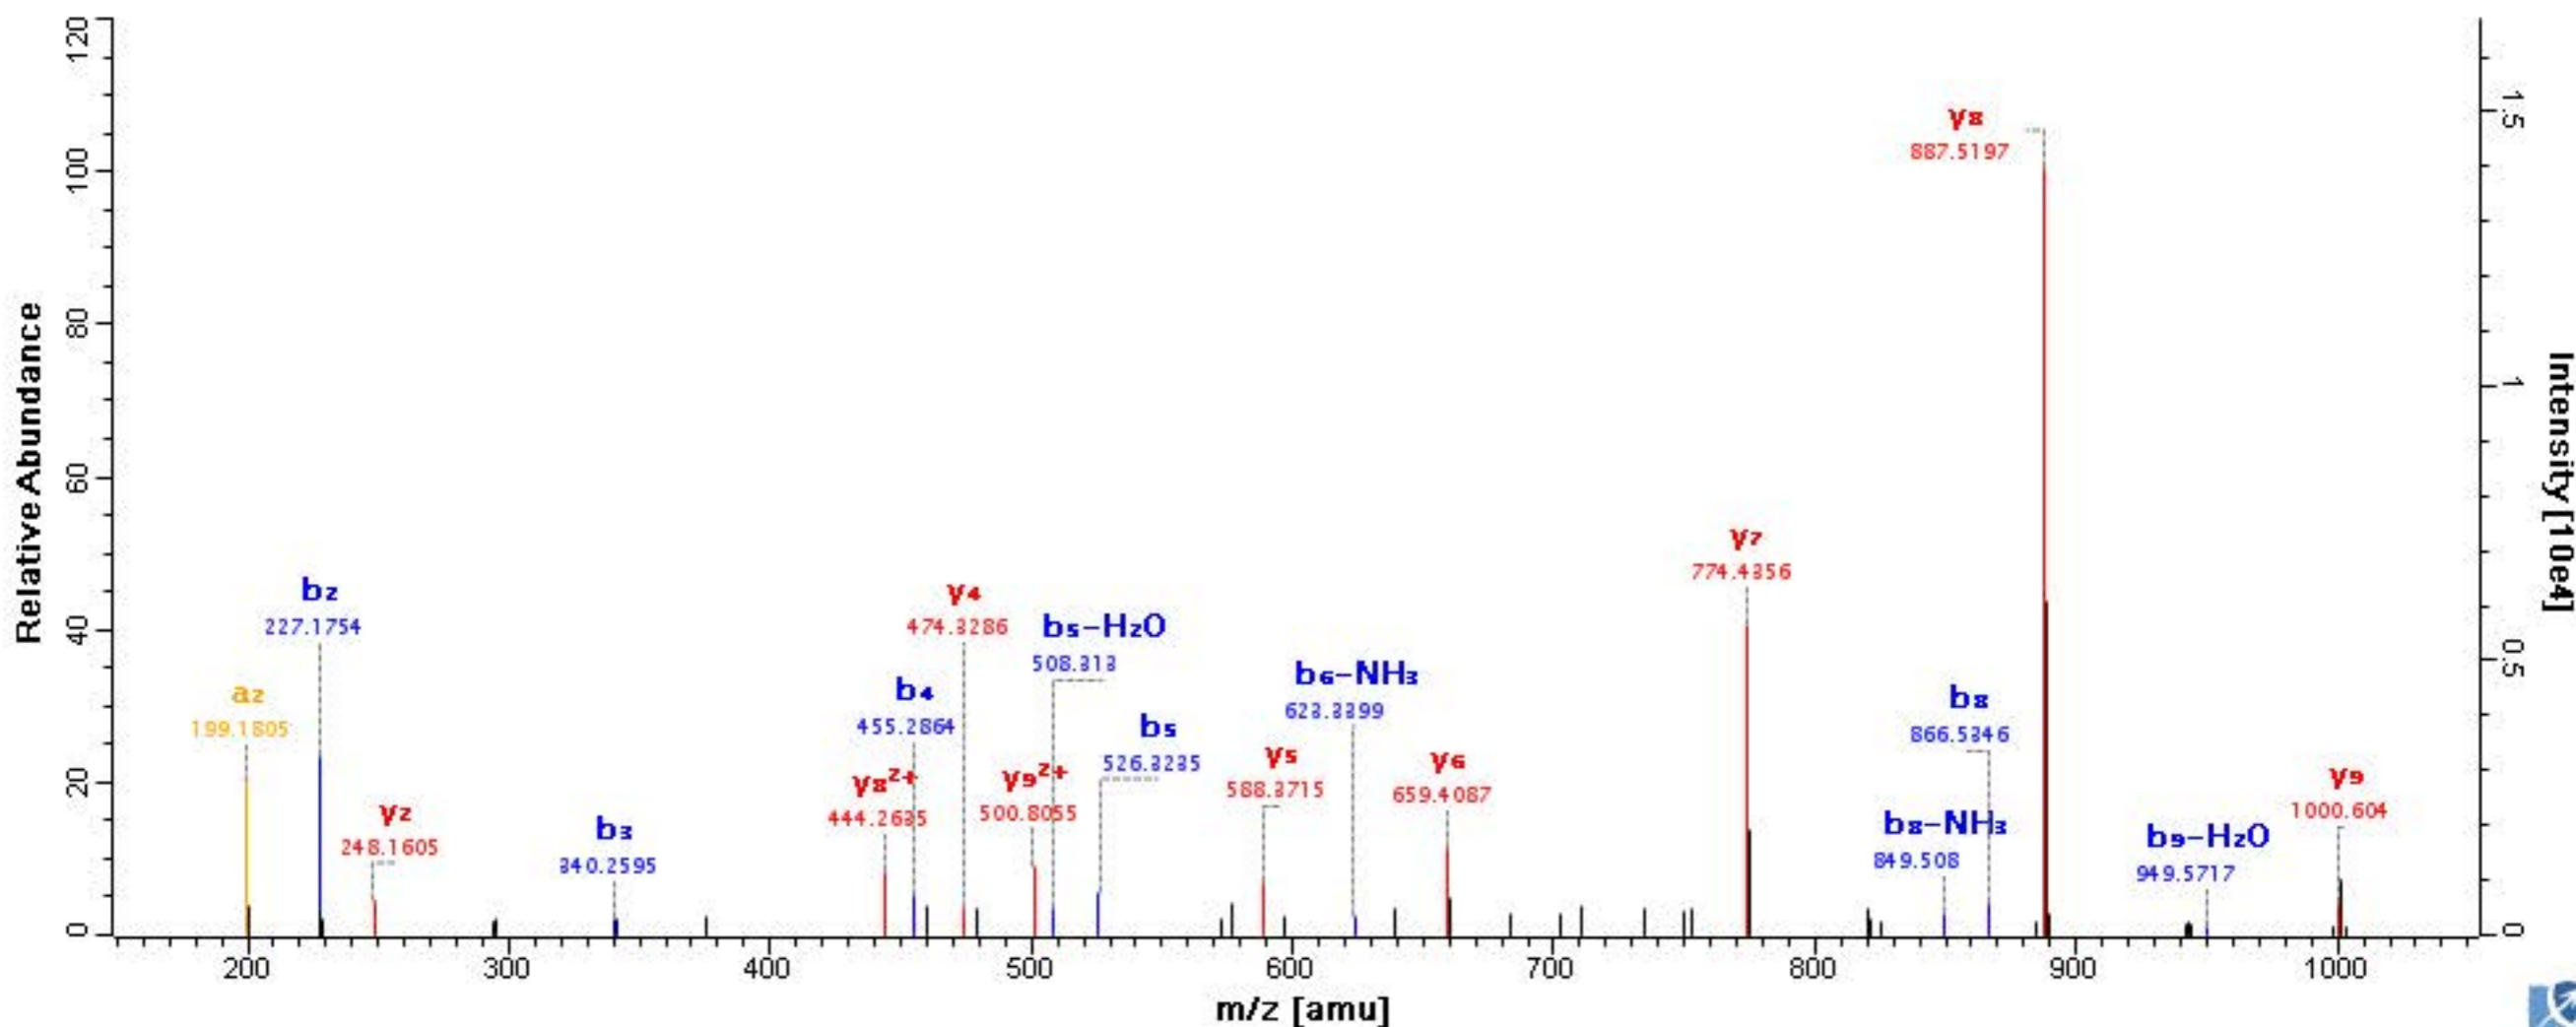

#### precursor information

|                   |                     |
|-------------------|---------------------|
| Mass:             | 1112.68073          |
| m/z:              | System.Collections. |
| Charge:           | System.Collections. |
| Retentiontime:    | System.Collections. |
| Score:            | 118.1773            |
| Mass Error [ppm]: | 0.20155             |
| PEP:              | 0.00076257          |
| Precursor Type:   | MULTI               |

#### general information

|                       |           |
|-----------------------|-----------|
| Annotation:           | 8 of 10   |
| AminoAcids Coverage:  | 80 %      |
| Intensity Coverage:   | 64 %      |
| Protein Localisation: | 59 ... 68 |

| a ion     |          | b ion     |          |     | y ion |          | y <sup>2+</sup> ion |           |          |           |
|-----------|----------|-----------|----------|-----|-------|----------|---------------------|-----------|----------|-----------|
| Δ dalton  | mass     | Δ dalton  | mass     | seq |       | Δ dalton | mass                | Δ dalton  | mass     |           |
|           | 86.09643 |           | 114.0913 | 1   | I     | 9        |                     |           |          |           |
| -0.021676 | 199.1805 | -0.035085 | 227.1754 | 2   | I     | 8        | 1000.604            | -0.074365 | 500.8055 | +0.084393 |
|           | 312.2646 | -0.079048 | 340.2595 | 3   | I     | 7        | 887.5197            | +0.021113 | 444.2635 | -0.112039 |
|           | 427.2915 | -0.004002 | 455.2864 | 4   | D     | 6        | 774.4356            | +0.016431 | 774.4356 |           |
|           | 498.3286 | -0.366982 | 526.3235 | 5   | A     | 5        | 659.4087            | -0.024802 | 659.4087 |           |
|           | 612.3715 |           | 640.3665 | 6   | N     | 4        | 588.3715            | +0.021956 | 588.3715 |           |
|           | 725.4556 |           | 753.4505 | 7   | I     | 3        | 474.3286            | +0.180545 | 474.3286 |           |
|           | 838.5397 | +0.218288 | 866.5346 | 8   | I     | 2        | 361.2445            |           | 361.2445 |           |
|           | 939.5873 |           | 967.5823 | 9   | T     | 1        | 248.1605            | +0.129251 | 248.1605 |           |
|           |          |           |          | 10  | K     | 0        | 147.1128            |           | 147.1128 |           |

Source: 201 20420\_VR\_Bsu\_TripleSILAC\_L2ESLRep\_OG\_F05  
 Scannumber: 22995  
 Protein: BSU02570; ycbN  
 Peptide Score: 67.15  
 Method: ITMS; CID; 3

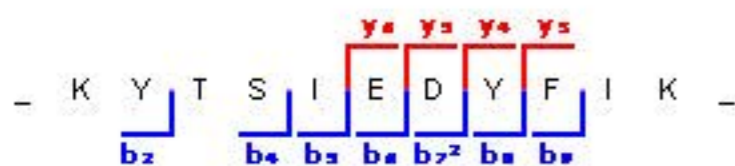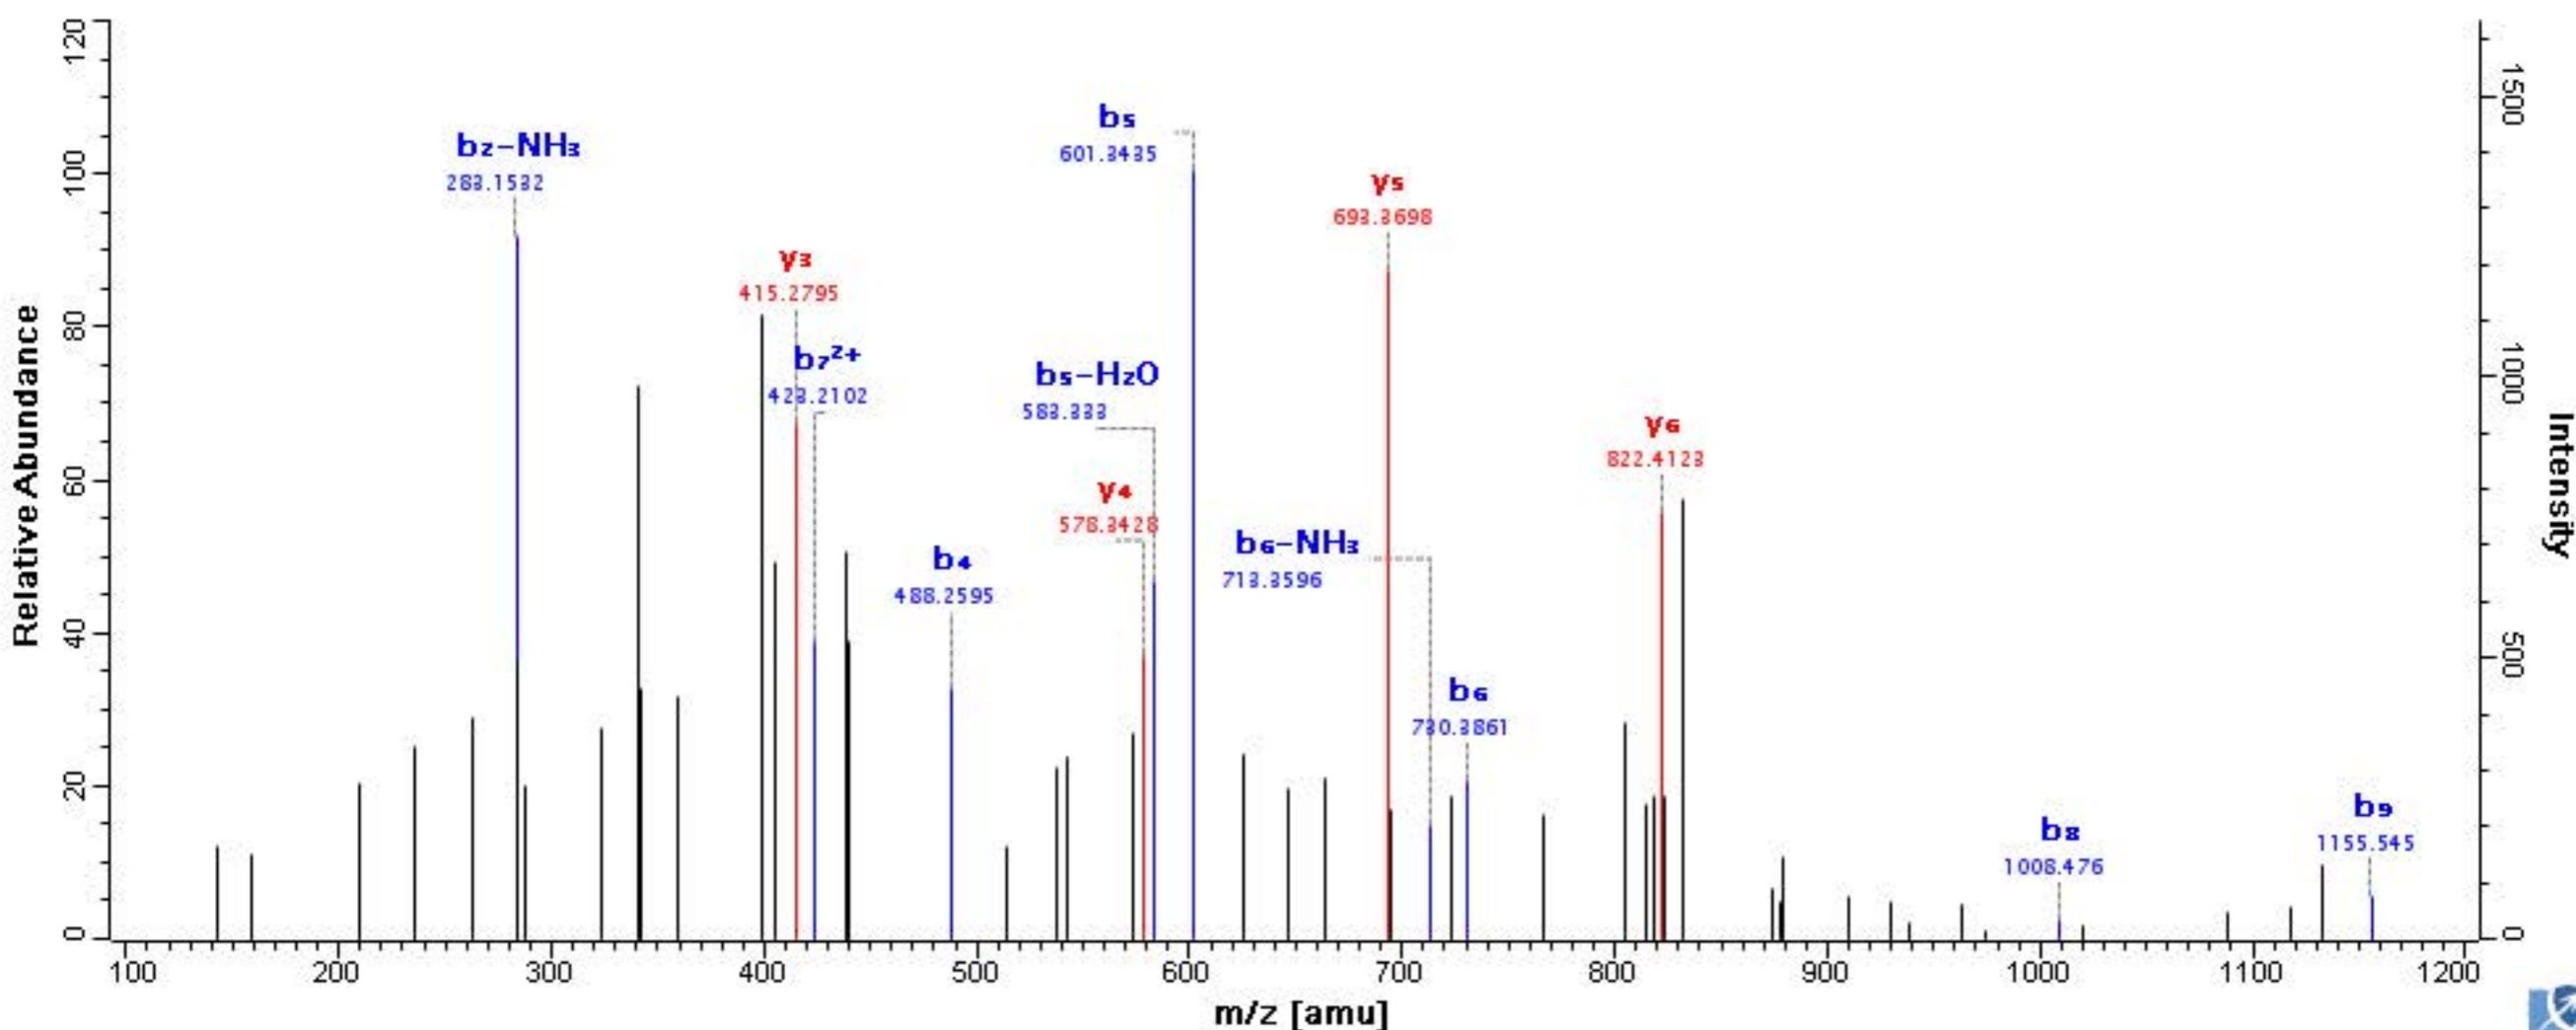

#### precursor information

|                   |                     |
|-------------------|---------------------|
| Mass:             | 1405.71122          |
| m/z:              | System.Collections. |
| Charge:           | System.Collections. |
| Retentiontime:    | System.Collections. |
| Score:            | 67.15321            |
| Mass Error [ppm]: | -1.2064             |
| PEP:              | 0.0045994           |
| Precursor Type:   | MULTI               |

#### general information

|                       |             |
|-----------------------|-------------|
| Annotation:           | 7 of 11     |
| AminoAcids Coverage:  | 64 %        |
| Intensity Coverage:   | 39 %        |
| Protein Localisation: | 288 ... 298 |

| b <sup>2+</sup> ion |              | b ion      |              |     | y ion |          |              |            |
|---------------------|--------------|------------|--------------|-----|-------|----------|--------------|------------|
| Δ dalton            | mass         | Δ dalton   | mass         | seq |       | Δ dalton | mass         |            |
|                     | 137.1164383  |            | 137.1164383  | 1   | K     | 10       |              |            |
|                     | 300.17976684 |            | 300.17976684 | 2   | Y     | 9        | 1286.6394449 |            |
|                     | 401.22744531 |            | 401.22744531 | 3   | T     | 8        | 1123.5761164 |            |
|                     | 488.25947372 | +0.1617909 | 488.25947372 | 4   | S     | 7        | 1022.5284379 |            |
|                     | 601.3435377  | +0.1689135 | 601.3435377  | 5   | I     | 6        | 935.49640953 |            |
|                     | 730.3861308  | +0.1561666 | 730.3861308  | 6   | E     | 5        | 822.41234555 | +0.1605304 |
| +0.0544733          | 423.21017515 |            | 845.41307383 | 7   | D     | 4        | 693.36975245 | -0.0253311 |
|                     | 1008.4764024 | +0.3095473 | 1008.4764024 | 8   | Y     | 3        | 578.34280942 | +0.2577765 |
|                     | 1155.5448163 | +0.2189777 | 1155.5448163 | 9   | F     | 2        | 415.27948088 | -0.0128183 |
|                     | 1268.6288803 |            | 1268.6288803 | 10  | I     | 1        | 268.21106696 |            |
|                     |              |            |              | 11  | K     | 0        | 155.12700298 |            |

Source: 20120420\_VR\_Bsu\_TripleSILAC\_L2ESLRep\_OG\_F09  
 Scannumber: 10370  
 Protein: BSU39960; S14IR; yxal  
 Peptide Score: 136.11  
 Method: ITMS; CID; 3

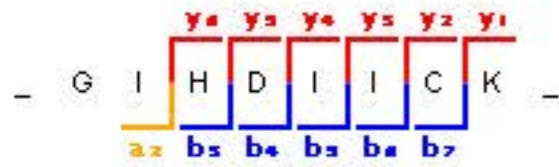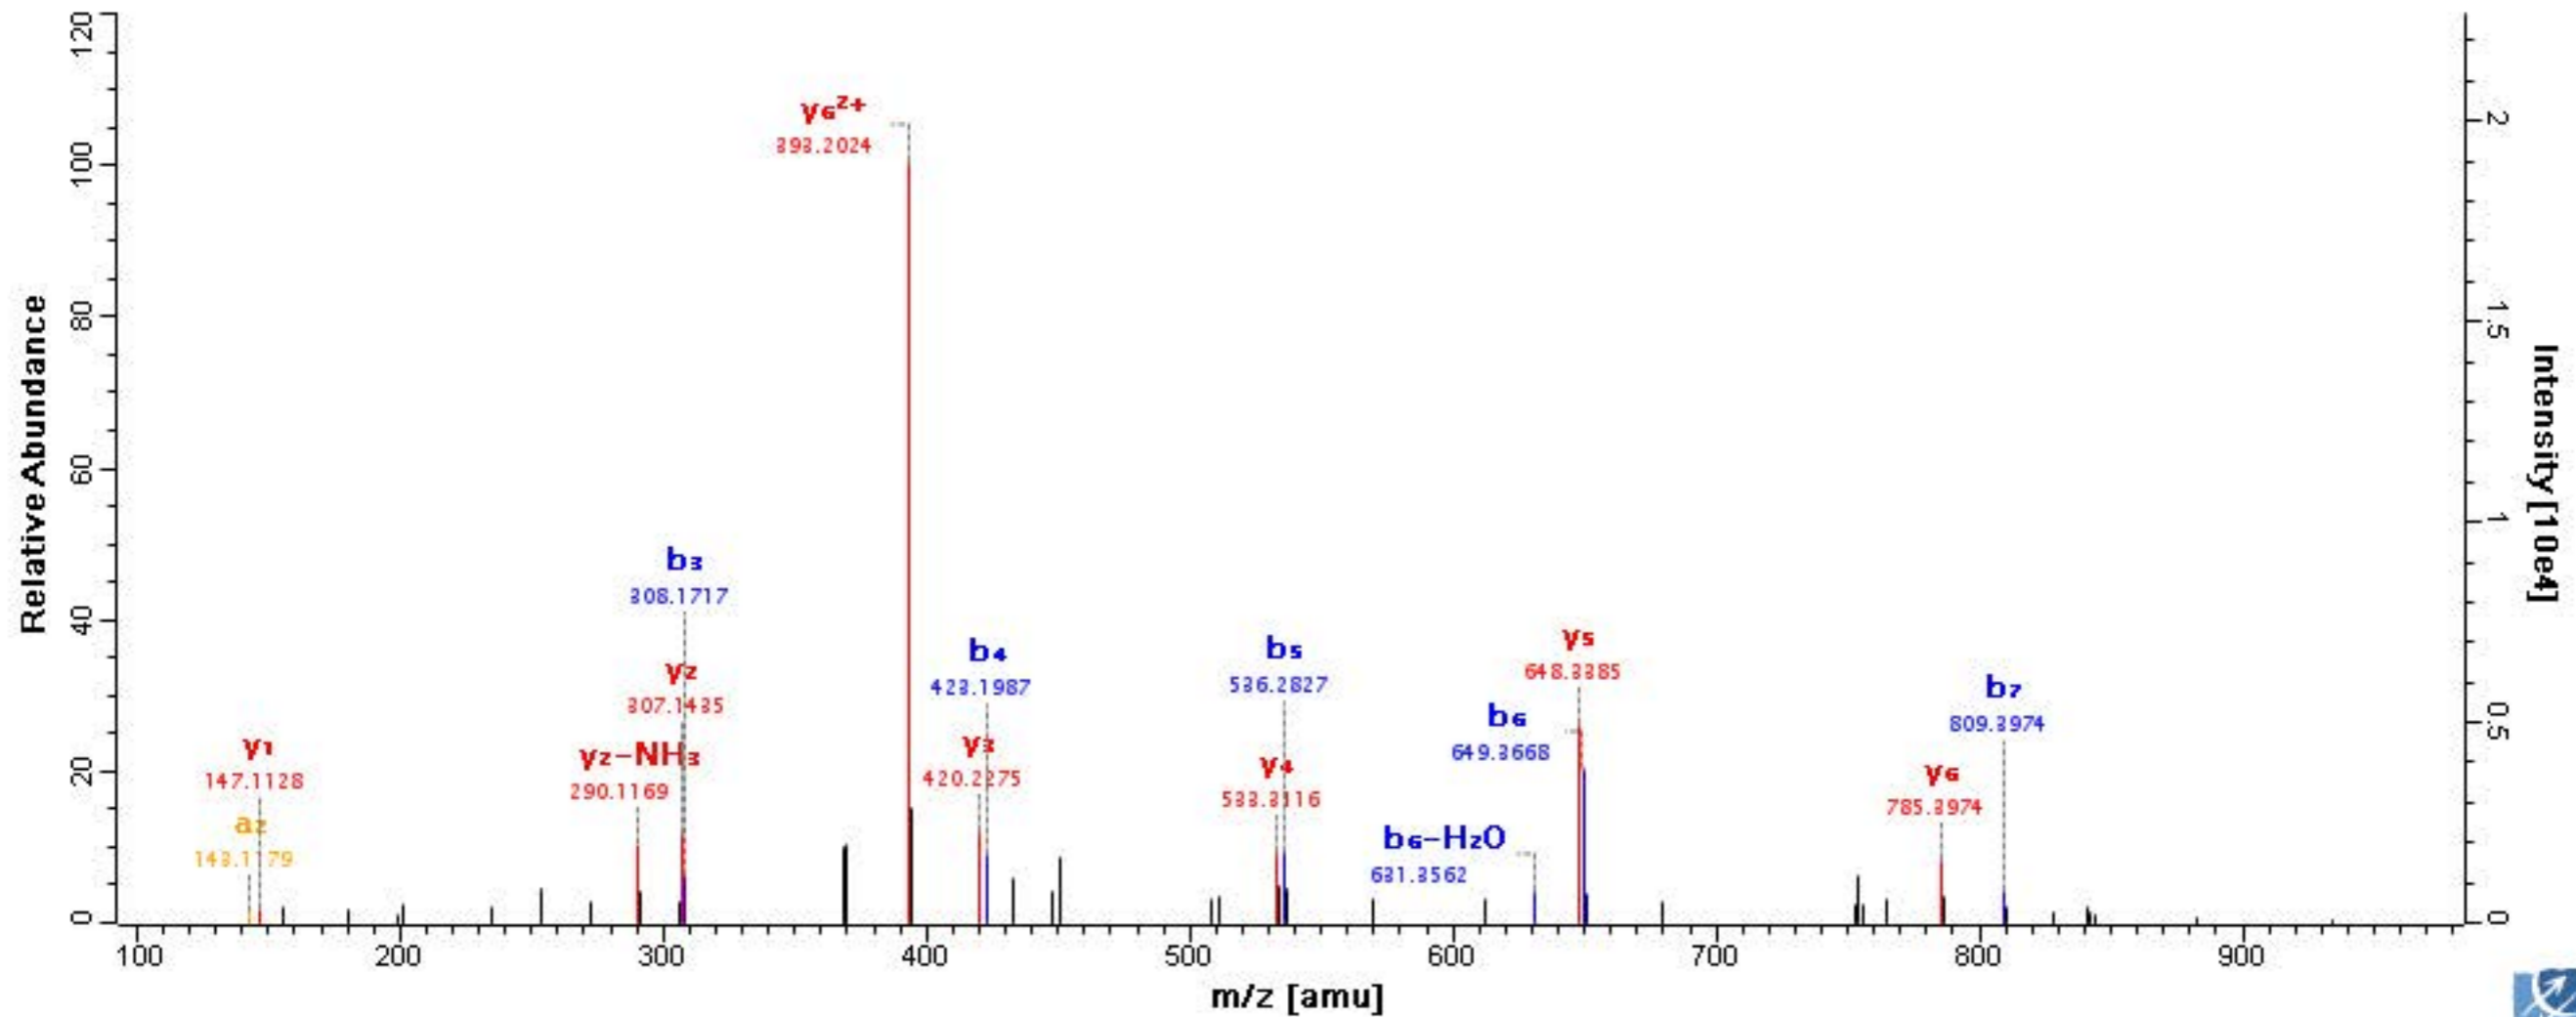

#### precursor information

|                       |                     |
|-----------------------|---------------------|
| Mass:                 | 954.49604           |
| m/z:                  | System.Collections. |
| Charge:               | System.Collections. |
| Retentiontime:        | System.Collections. |
| Score:                | 136.1133            |
| Mass Error [ppm]:     | 0.37076             |
| g PEP:                | 0.00037902          |
| Annotation:           | 7 of 8              |
| AminoAcids Coverage:  | 88 %                |
| Intensity Coverage:   | 64 %                |
| Protein Localisation: | 138 ... 145         |

| a ion     |          | b ion     |          |   |     |   | y ion    |           | y <sup>2+</sup> ion |           |
|-----------|----------|-----------|----------|---|-----|---|----------|-----------|---------------------|-----------|
| Δ dalton  | mass     | Δ dalton  | mass     |   | seq |   | Δ dalton | mass      | Δ dalton            | mass      |
|           | 30.03383 |           | 58.02874 | 1 | G   | 7 |          |           |                     |           |
| +0.070572 | 143.1179 |           | 171.1128 | 2 | I   | 6 | 898.4815 |           | 898.4815            |           |
|           | 280.1768 | +0.077643 | 308.1717 | 3 | H   | 5 | 785.3974 | +0.07693  | 393.2024            | +0.077796 |
|           | 395.2037 | +0.06782  | 423.1987 | 4 | D   | 4 | 648.3385 | +0.020607 | 648.3385            |           |
|           | 508.2878 | +0.109367 | 536.2827 | 5 | I   | 3 | 533.3116 | +0.029728 | 533.3116            |           |
|           | 621.3719 | +0.012852 | 649.3668 | 6 | I   | 2 | 420.2275 | -0.000221 | 420.2275            |           |
|           | 781.4025 | +0.05746  | 809.3974 | 7 | C   | 1 | 307.1435 | +0.027629 | 307.1435            |           |
|           |          |           |          | 8 | K   | 0 | 147.1128 | +0.023579 | 147.1128            |           |

Source: 20120508\_VR\_Bsu\_TripleSILACrep1\_pT1L1T2\_F06  
 Scannumber: 5003  
 Protein: BSU40160; yydH  
 Peptide Score: 108.74  
 Method: ITMS; CID; 3

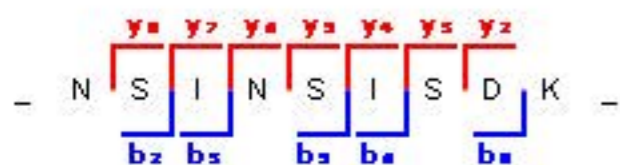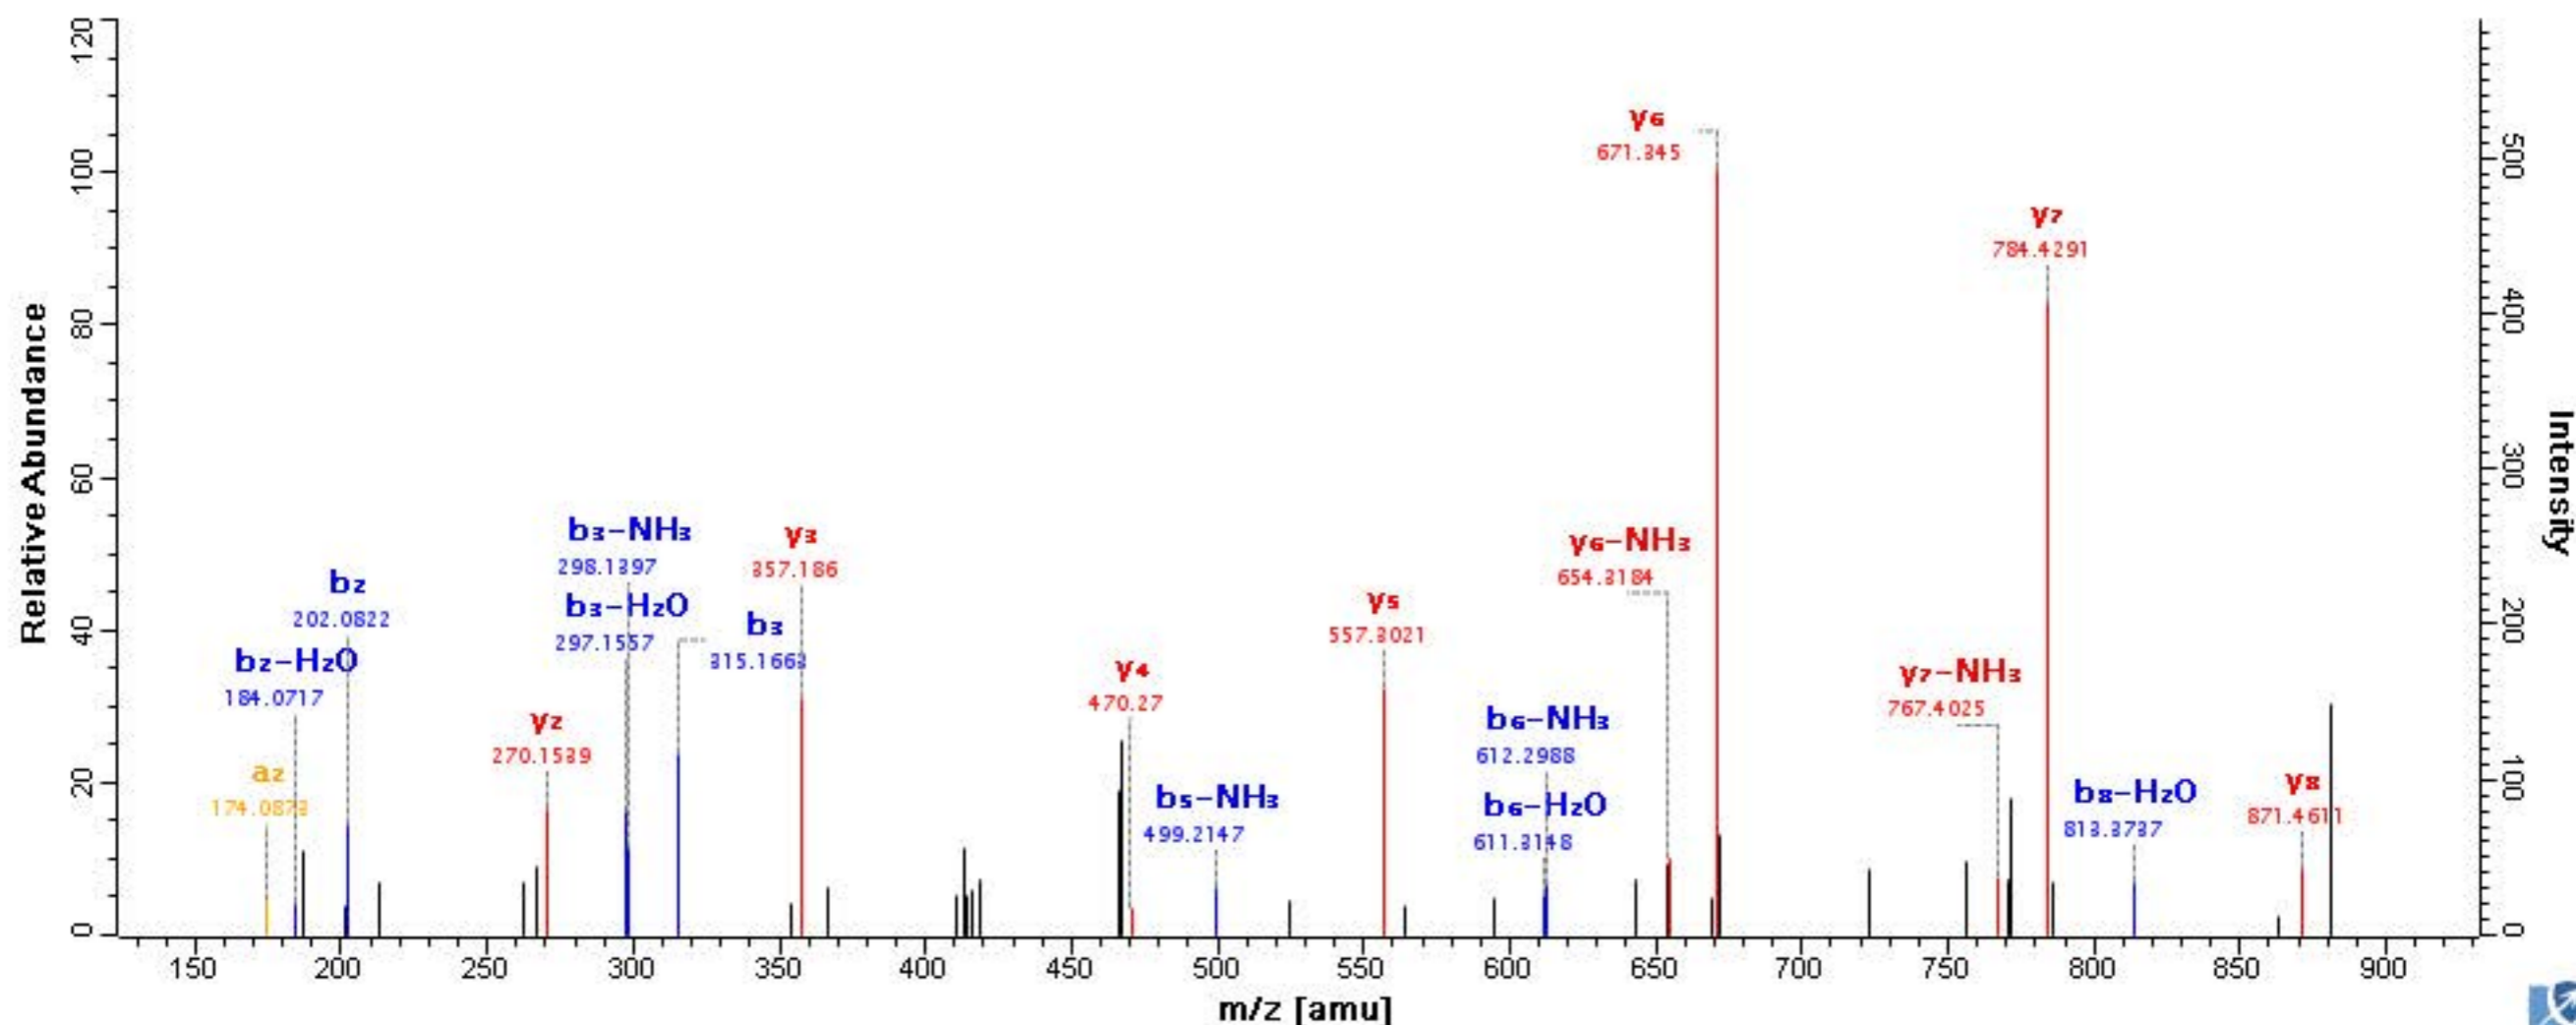

#### precursor information

|                       |                     |
|-----------------------|---------------------|
| Mass:                 | 976.48204           |
| m/z:                  | System.Collections. |
| Charge:               | System.Collections. |
| Retentiontime:        | System.Collections. |
| Score:                | 108.7426            |
| Mass Error [ppm]:     | -0.50893            |
| PEP:                  | 0.0015294           |
| g Precursor Type:     | MULTI               |
| Annotation:           | 7 of 9              |
| AminoAcids Coverag    | 78 %                |
| Intensity Coverage:   | 60 %                |
| Protein Localisation: | 32 ... 40           |

| a ion      |              | b ion      |              |     | y ion |          |                         |
|------------|--------------|------------|--------------|-----|-------|----------|-------------------------|
| Δ dalton   | mass         | Δ dalton   | mass         | seq |       | Δ dalton | mass                    |
|            | 87.055289292 |            | 115.05020391 | 1   | N     | 8        |                         |
| +0.0746086 | 174.0873177  | -0.0622433 | 202.08223232 | 2   | S     | 7        | 871.46108665 -0.0442776 |
|            | 287.17138168 | +0.0590455 | 315.1662963  | 3   | I     | 6        | 784.42905824 -0.006817  |
|            | 401.21430913 |            | 429.20922375 | 4   | N     | 5        | 671.34499426 -0.0577018 |
|            | 488.24633754 |            | 516.24125216 | 5   | S     | 4        | 557.30206682 +0.1005821 |
|            | 601.33040152 |            | 629.32531614 | 6   | I     | 3        | 470.27003841 +0.1260187 |
|            | 688.36242993 |            | 716.35734455 | 7   | S     | 2        | 357.18597443 +0.0183408 |
|            | 803.38937296 |            | 831.38428758 | 8   | D     | 1        | 270.15394602 +0.0452117 |
|            |              |            |              | 9   | K     | 0        | 155.12700298            |

Source: 20120508\_VR\_Bsu\_TripleSILACrep1\_pT1L1T2\_F08  
 Scannumber: 1968  
 Protein: bdbB; BSU21440; yolK  
 Peptide Score: 99.92  
 Method: ITMS; CID; 3

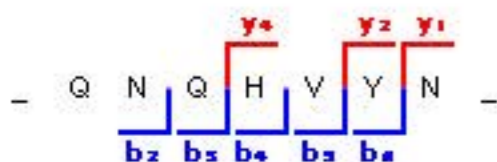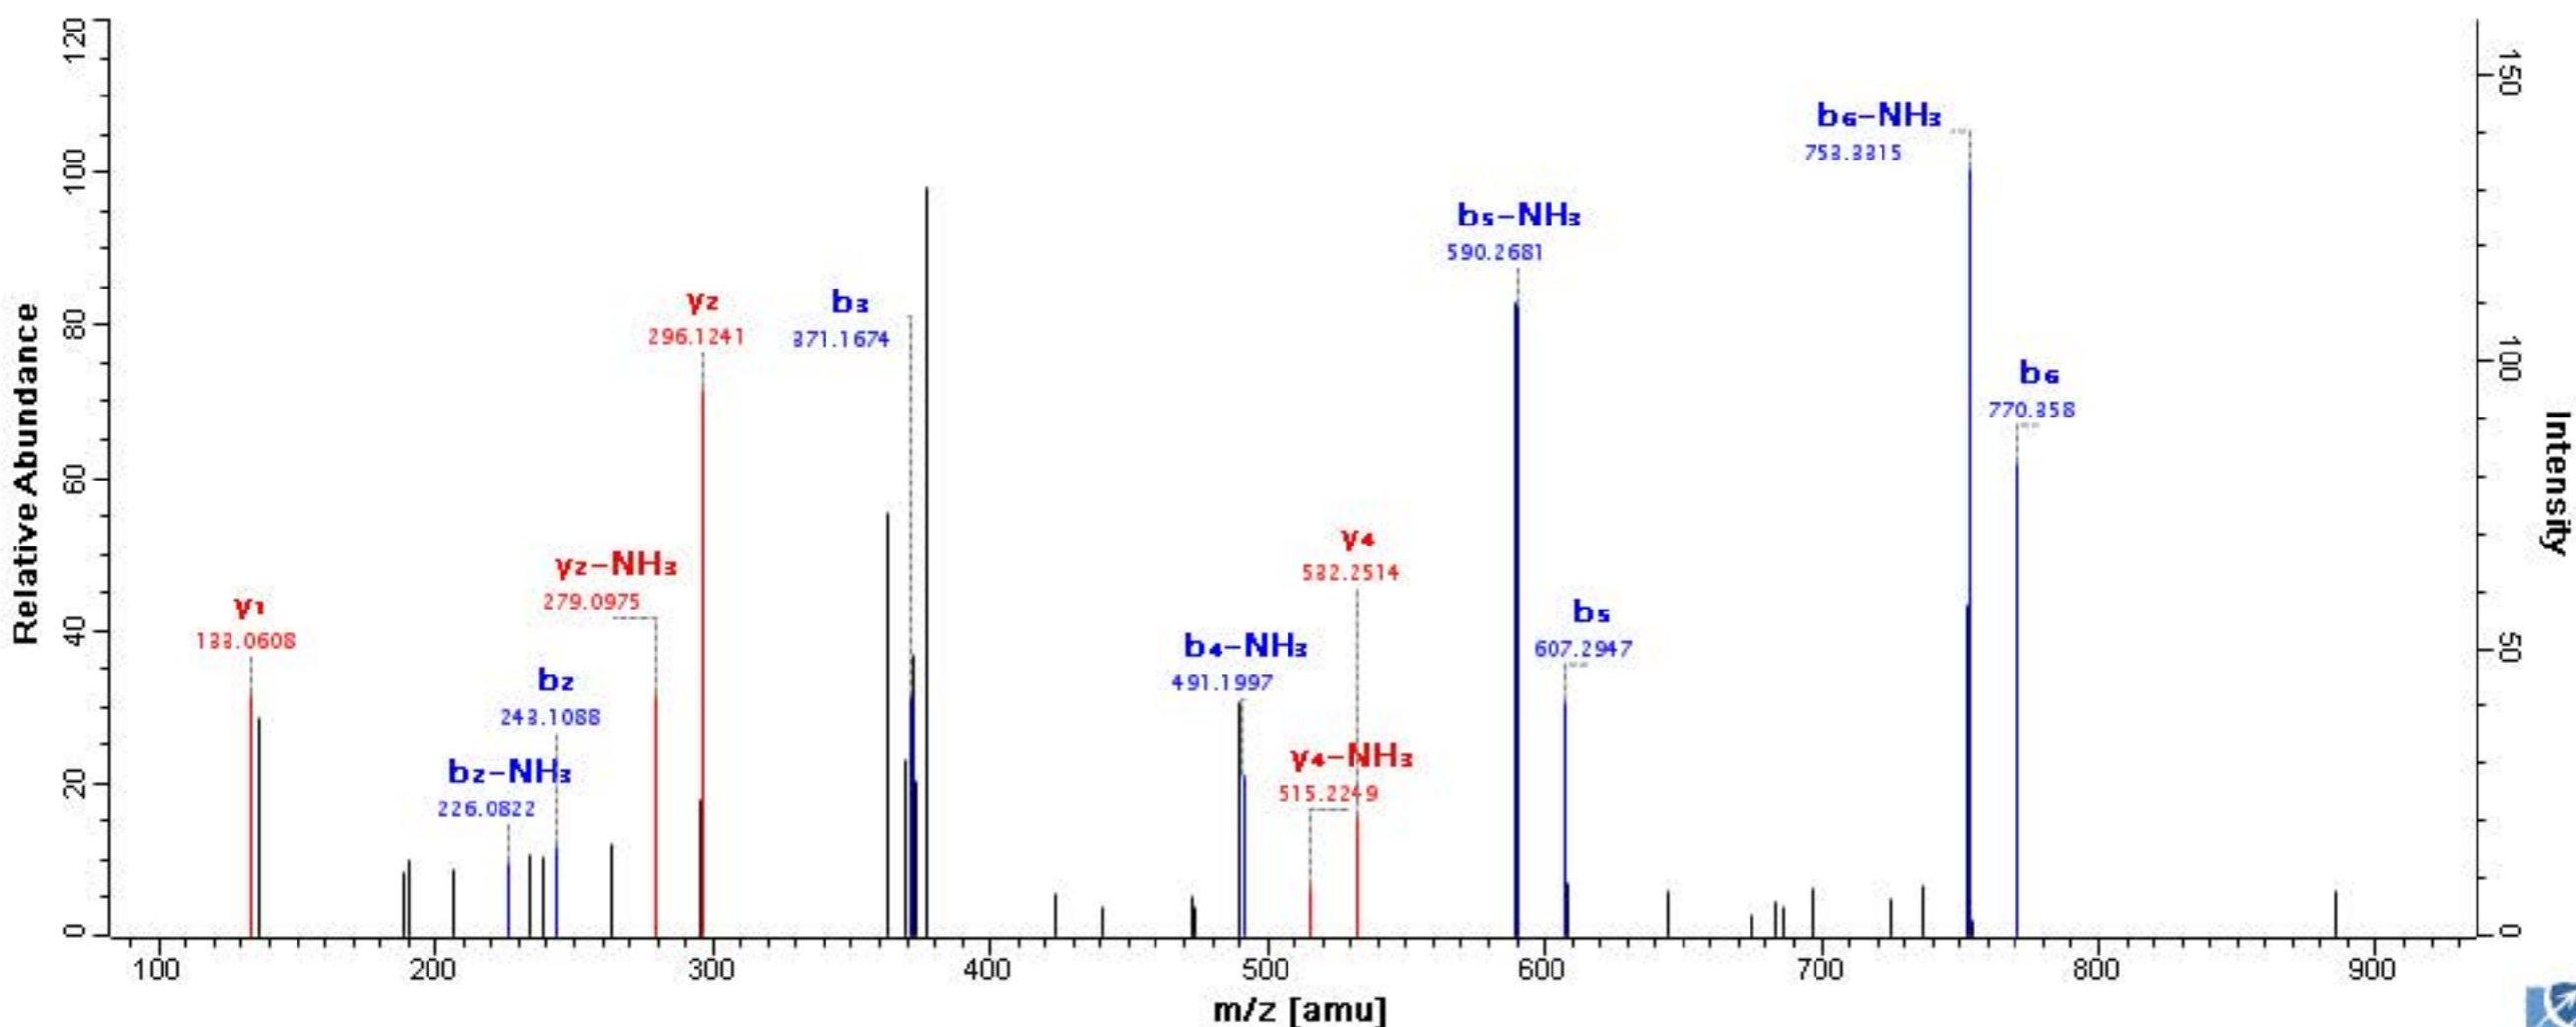

**precursor information**

|                       |                     |
|-----------------------|---------------------|
| Mass:                 | 901.40406           |
| m/z:                  | System.Collections. |
| Charge:               | System.Collections. |
| Retentiontime:        | System.Collections. |
| Score:                | 99.91949            |
| Mass Error [ppm]:     | -0.18307            |
| PFP:                  | 0.0041422           |
| Annotation:           | 6 of 7              |
| AminoAcids Coverage:  | 86 %                |
| Intensity Coverage:   | 47 %                |
| Protein Localisation: | 142 ... 148         |

| b ion      |               |   |     |   |               | y ion      |  |
|------------|---------------|---|-----|---|---------------|------------|--|
| Δ dalton   | mass          |   | seq |   | Δ dalton      | mass       |  |
|            | 129.065853978 | 1 | Q   | 6 |               |            |  |
| +0.4079422 | 243.108781425 | 2 | N   | 5 | 774.352927876 |            |  |
| -0.036347  | 371.167358937 | 3 | Q   | 4 | 660.310000428 |            |  |
|            | 508.226270799 | 4 | H   | 3 | 532.251422917 | -0.0869332 |  |
| -0.1474069 | 607.294684715 | 5 | V   | 2 | 395.192511055 |            |  |
| -0.1070977 | 770.358013254 | 6 | Y   | 1 | 296.124097138 | +0.0615718 |  |
|            |               | 7 | N   | 0 | 133.0607686   | +0.0711284 |  |

Source: 20120508\_VR\_Bsu\_TripleSILACrep1\_pT1L1T2\_F09  
 Scannumber: 3720  
 Protein: BSU02590; ycbP  
 Peptide Score: 108.43  
 Method: ITMS; CID; 3

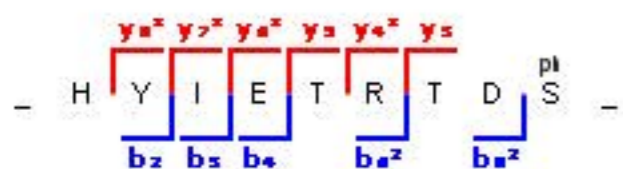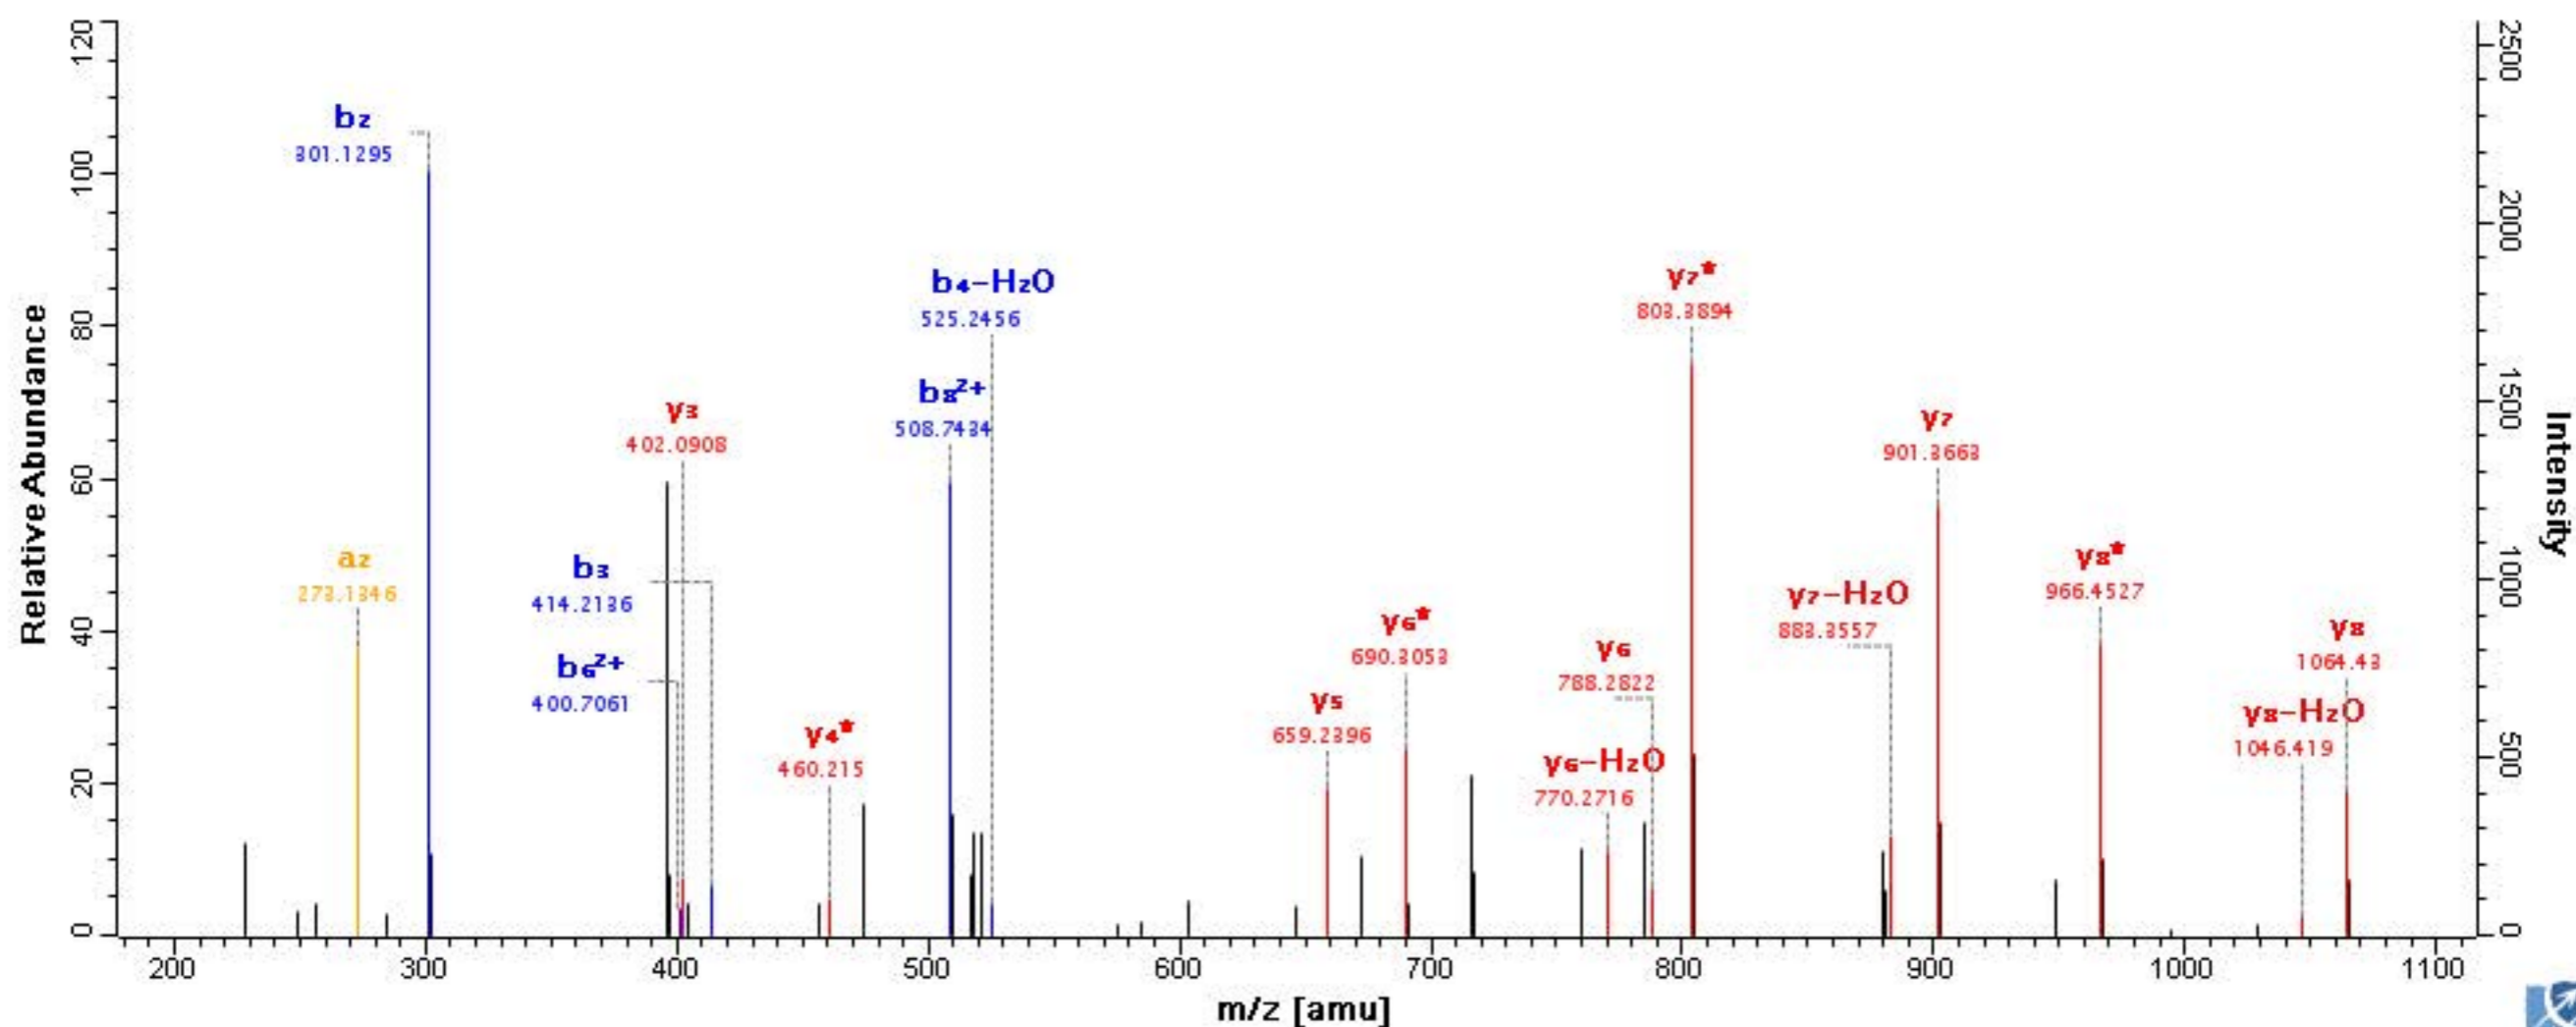

**precursor information**

|                          |                     |
|--------------------------|---------------------|
| Mass:                    | 1200.48108          |
| m/z:                     | System.Collections. |
| Charge:                  | System.Collections. |
| Retentiontime:           | System.Collections. |
| Score:                   | 108.433             |
| Mass Error [ppm]:        | -0.12927            |
| PEP:                     | 0.0031622           |
| <b>g</b> Precursor Type: | ISO                 |
| Annotation:              | 7 of 9              |
| AminoAcids Coverag       | 78 %                |
| Intensity Coverage:      | 59 %                |
| Protein Localisation:    | 120 ... 128         |

| a ion     |          | b <sup>2+</sup> ion |          | b ion     |          |   |     | y ion    |          |
|-----------|----------|---------------------|----------|-----------|----------|---|-----|----------|----------|
| Δ dalton  | mass     | Δ dalton            | mass     | Δ dalton  | mass     |   | seq | Δ dalton | mass     |
|           | 110.0713 |                     | 138.0662 |           | 138.0662 | 1 | H   | 8        |          |
| +0.095134 | 273.1346 |                     | 301.1295 | -0.034668 | 301.1295 | 2 | Y   | 7        | 1064.43  |
|           | 386.2187 |                     | 414.2136 | +0.012371 | 414.2136 | 3 | I   | 6        | 901.3663 |
|           | 515.2613 |                     | 543.2562 |           | 543.2562 | 4 | E   | 5        | 788.2822 |
|           | 616.3089 |                     | 644.3039 |           | 644.3039 | 5 | T   | 4        | 659.2396 |
|           | 772.41   | +0.19128            | 400.7061 |           | 800.405  | 6 | R   | 3        | 558.1919 |
|           | 873.4577 |                     | 901.4526 |           | 901.4526 | 7 | T   | 2        | 402.0908 |
|           | 988.4847 | +0.008889           | 508.7434 |           | 1016.48  | 8 | D   | 1        | 301.0431 |
|           |          |                     |          |           |          | 9 | S   | 0        | 186.0162 |

Source: 20120508\_VR\_Bsu\_TripleSILACrep1\_pT1L1T2\_F10  
 Scannumber: 5982  
 Protein: BSU14570; ykrC; ykyA  
 Peptide Score: 195.77  
 Method: ITMS; CID; 3

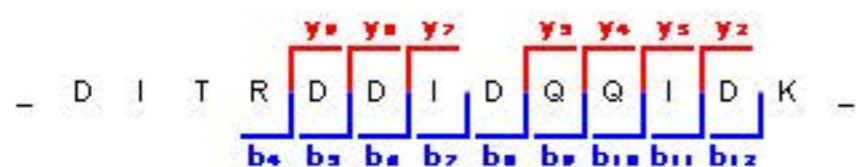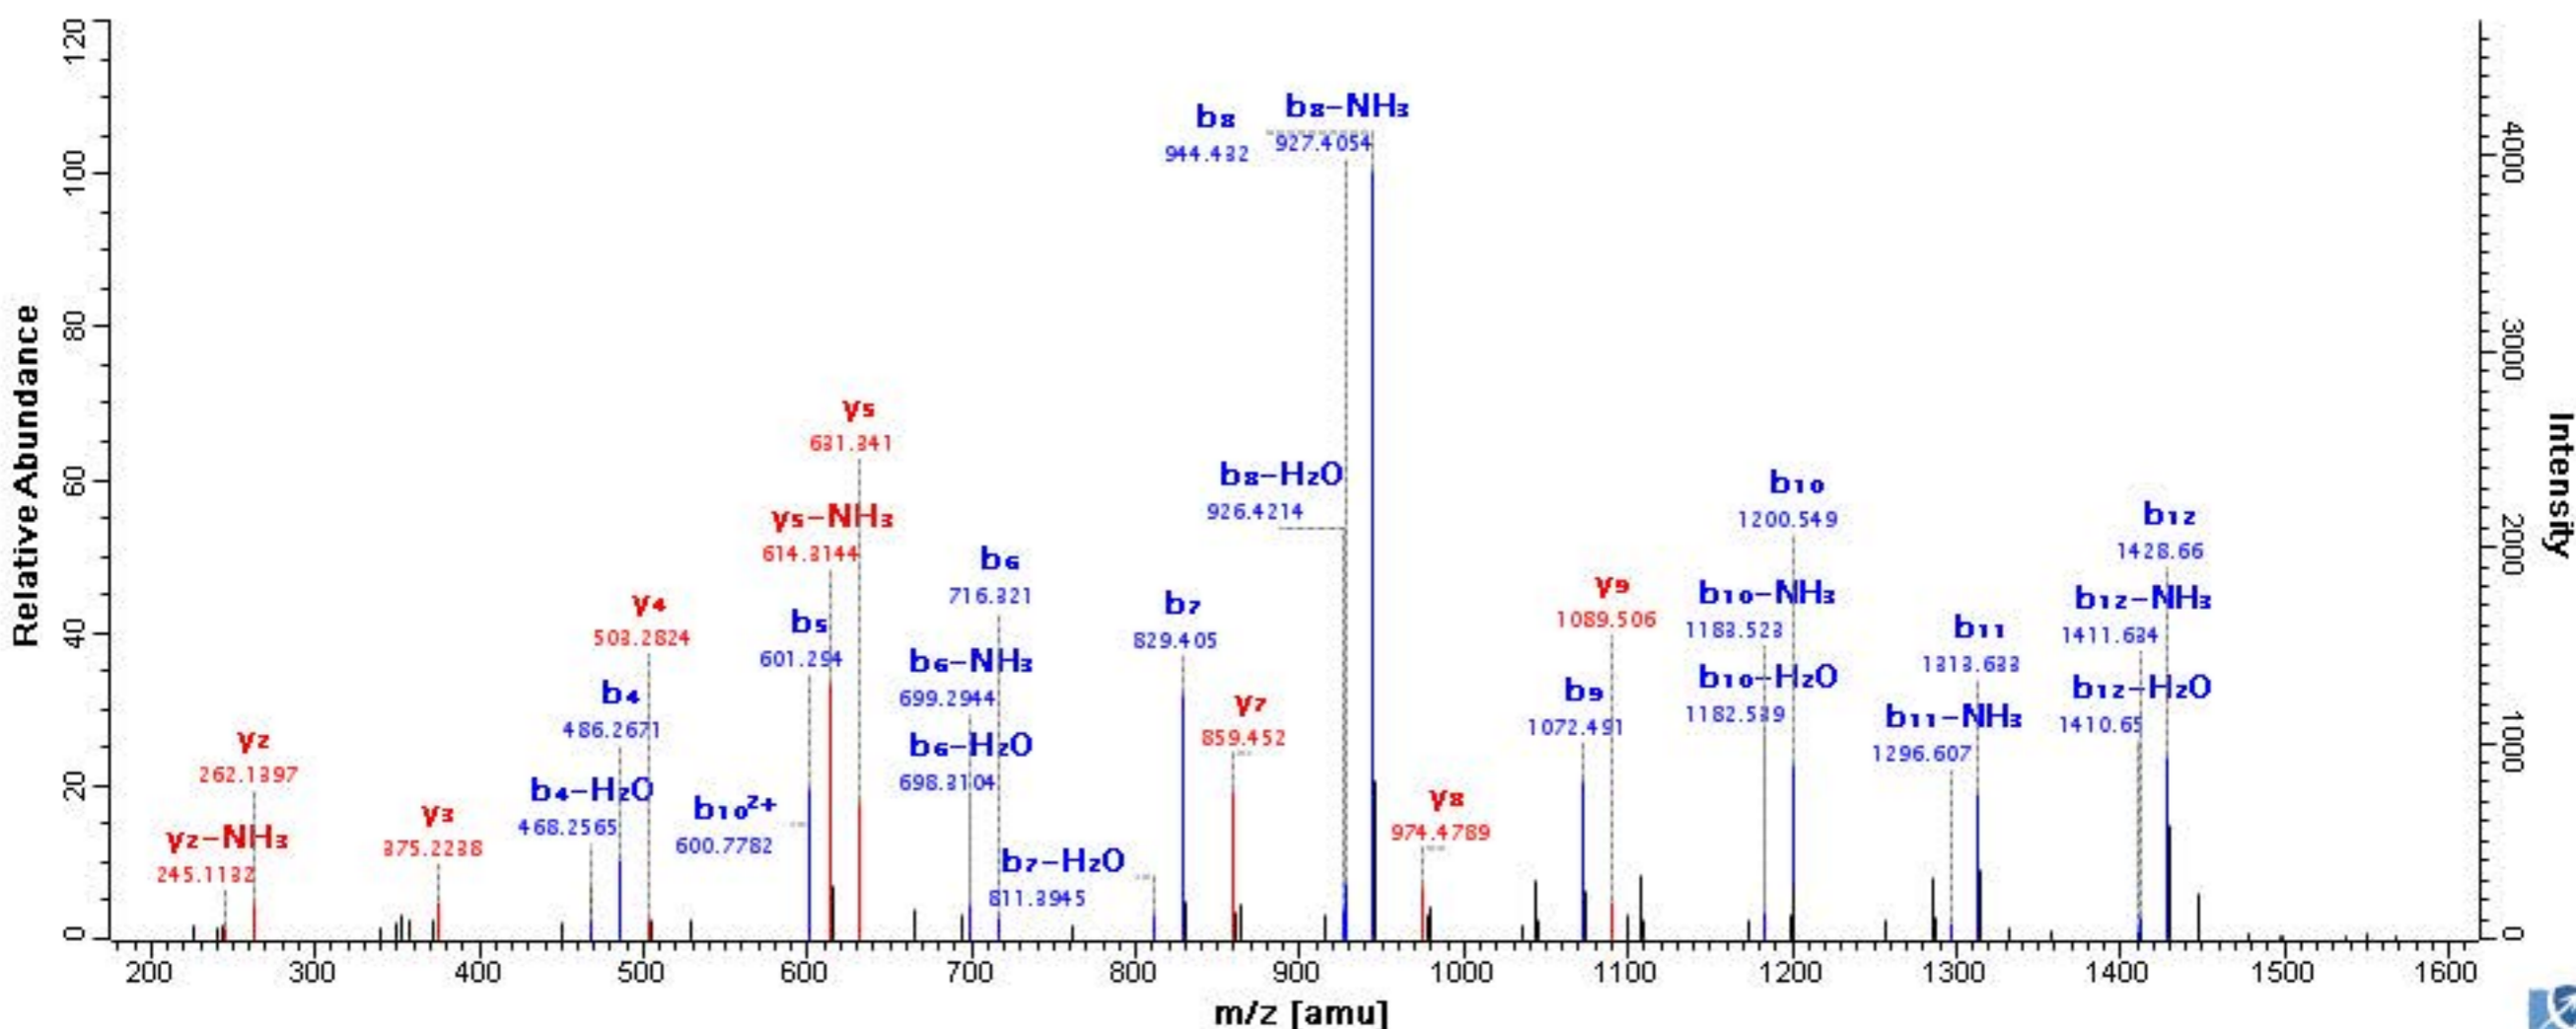

#### precursor information

|                   |                     |
|-------------------|---------------------|
| Mass:             | 1573.75853          |
| m/z:              | System.Collections. |
| Charge:           | System.Collections. |
| Retentiontime:    | System.Collections. |
| Score:            | 195.7693            |
| Mass Error [ppm]: | 0.096837            |
| PEP:              | 6.4774E-47          |
| Precursor Type:   | MULTI               |

#### general information

|                       |             |
|-----------------------|-------------|
| Annotation:           | 9 of 13     |
| AminoAcids Coverage:  | 69 %        |
| Intensity Coverage:   | 67 %        |
| Protein Localisation: | 171 ... 183 |

| b <sup>2+</sup> ion |              | b ion      |              |     | y ion |          |                         |
|---------------------|--------------|------------|--------------|-----|-------|----------|-------------------------|
| Δ dalton            | mass         | Δ dalton   | mass         | seq |       | Δ dalton | mass                    |
|                     | 116.0342195  |            | 116.0342195  | 1   | D     | 12       |                         |
|                     | 229.11828348 |            | 229.11828348 | 2   | I     | 11       | 1459.7387128            |
|                     | 330.16596195 |            | 330.16596195 | 3   | T     | 10       | 1346.6546488            |
|                     | 486.26707298 | +0.0868699 | 486.26707298 | 4   | R     | 9        | 1245.6069703            |
|                     | 601.29401601 | +0.1491603 | 601.29401601 | 5   | D     | 8        | 1089.5058593 +0.0909425 |
|                     | 716.32095905 | +0.0873051 | 716.32095905 | 6   | D     | 7        | 974.47891625 +0.0644797 |
|                     | 829.40502303 | -0.0365538 | 829.40502303 | 7   | I     | 6        | 859.45197322 +0.0452802 |
|                     | 944.43196606 | +0.0147503 | 944.43196606 | 8   | D     | 5        | 746.36790924            |
|                     | 1072.4905436 | +0.0062826 | 1072.4905436 | 9   | Q     | 4        | 631.34096621 +0.0373297 |
| +0.0011591          | 600.77819877 | +0.020459  | 1200.5491211 | 10  | Q     | 3        | 503.28238869 +0.1161098 |
|                     | 1313.6331851 | +0.0749448 | 1313.6331851 | 11  | I     | 2        | 375.22381118 -0.1339064 |
|                     | 1428.6601281 | +0.1217323 | 1428.6601281 | 12  | D     | 1        | 262.1397472 +0.1157154  |
|                     |              |            |              | 13  | K     | 0        | 147.11280417            |



Source: 20120508\_VR\_Bsu\_TripleSILACrep1\_pT1L1T2\_F12  
 Scannumber: 2514  
 Protein: BSU04360; mntH; ydaR  
 Peptide Score: 82.29  
 Method: ITMS; CID; 3

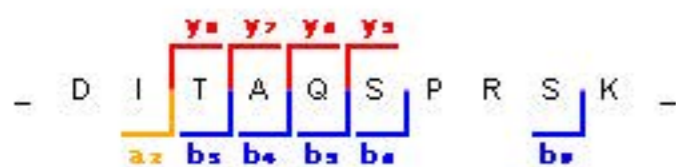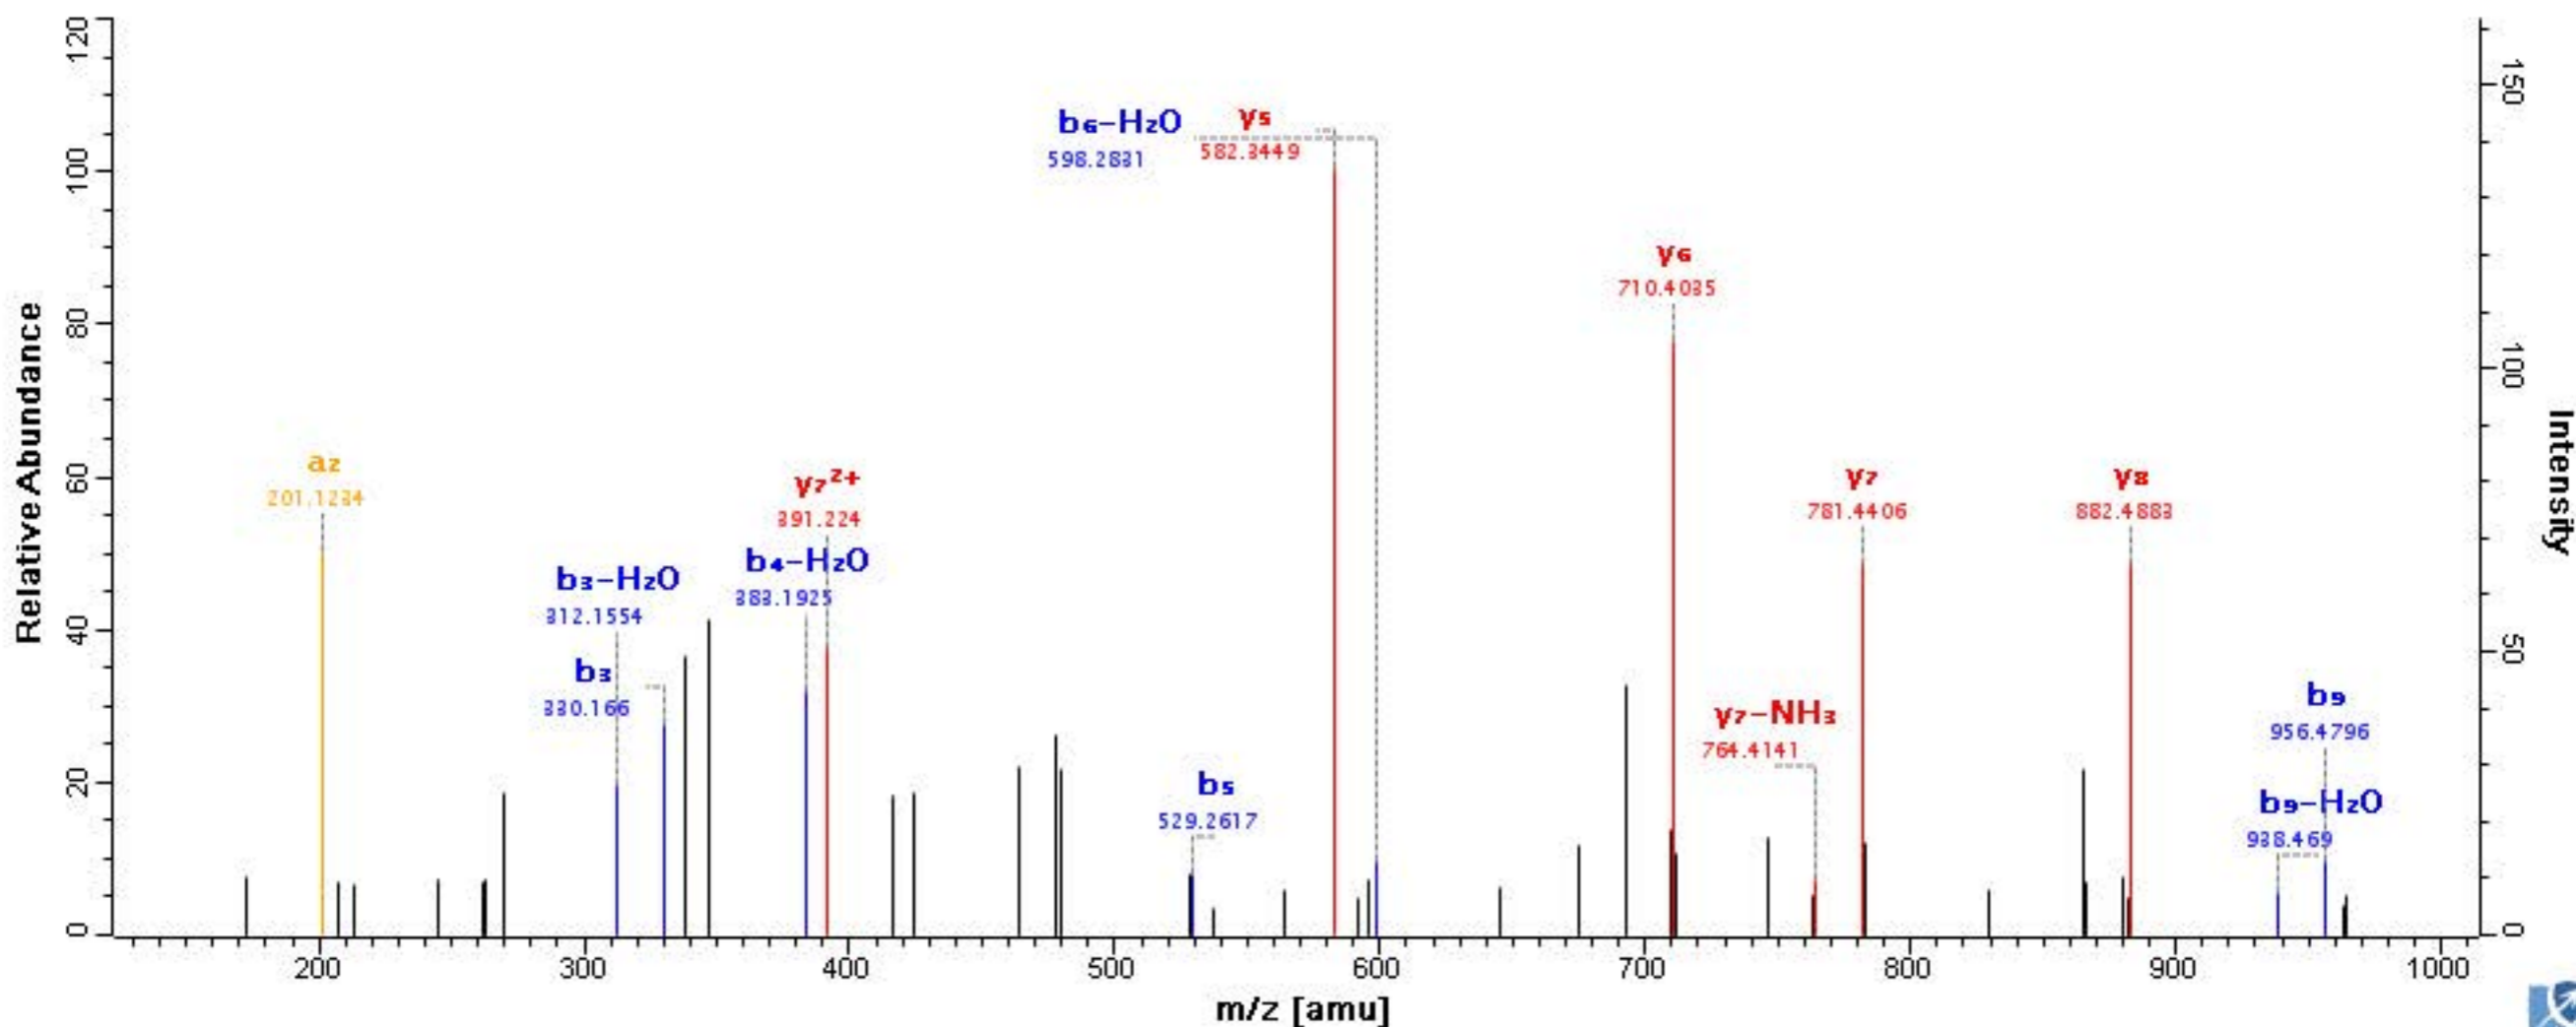

#### precursor information

|                   |                     |
|-------------------|---------------------|
| Mass:             | 1101.57838          |
| m/z:              | System.Collections. |
| Charge:           | System.Collections. |
| Retentiontime:    | System.Collections. |
| Score:            | 82.28683            |
| Mass Error [ppm]: | 0.4886              |
| PEP:              | 0.0025702           |
| Precursor Type:   | MULTI               |

#### general information

|                       |          |
|-----------------------|----------|
| Annotation:           | 6 of 10  |
| AminoAcids Coverage:  | 60 %     |
| Intensity Coverage:   | 53 %     |
| Protein Localisation: | 5 ... 14 |

| a ion     |          | b ion     |          |    | seq |          | y ion    |           | y <sup>2+</sup> ion |           |
|-----------|----------|-----------|----------|----|-----|----------|----------|-----------|---------------------|-----------|
| Δ dalton  | mass     | Δ dalton  | mass     |    |     | Δ dalton | mass     | Δ dalton  | mass                |           |
|           | 88.0393  |           | 116.0342 | 1  | D   | 9        |          |           |                     |           |
| +0.102736 | 201.1234 |           | 229.1183 | 2  | I   | 8        | 995.5724 |           | 995.5724            |           |
|           | 302.171  | +0.070977 | 330.166  | 3  | T   | 7        | 882.4883 | +0.087928 | 882.4883            |           |
|           | 373.2082 |           | 401.2031 | 4  | A   | 6        | 781.4406 | +0.212755 | 391.224             | +0.242052 |
|           | 501.2667 | -0.346797 | 529.2617 | 5  | Q   | 5        | 710.4035 | +0.115958 | 710.4035            |           |
|           | 588.2988 |           | 616.2937 | 6  | S   | 4        | 582.3449 | +0.112341 | 582.3449            |           |
|           | 685.3515 |           | 713.3464 | 7  | P   | 3        | 495.3129 |           | 495.3129            |           |
|           | 841.4526 |           | 869.4476 | 8  | R   | 2        | 398.2601 |           | 398.2601            |           |
|           | 928.4847 | +0.112151 | 956.4796 | 9  | S   | 1        | 242.159  |           | 242.159             |           |
|           |          |           |          | 10 | K   | 0        | 155.127  |           | 155.127             |           |

Source: 20120508\_VR\_Bsu\_TripleSILACrep1\_pT1L1T2\_F13  
 Scannumber: 2684  
 Protein: BSU13850; ykwW; zosA  
 Peptide Score: 111.17  
 Method: ITMS; CID; 3

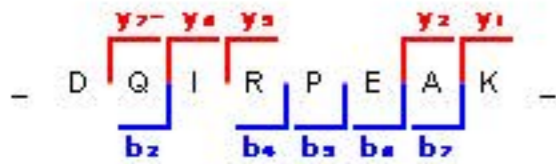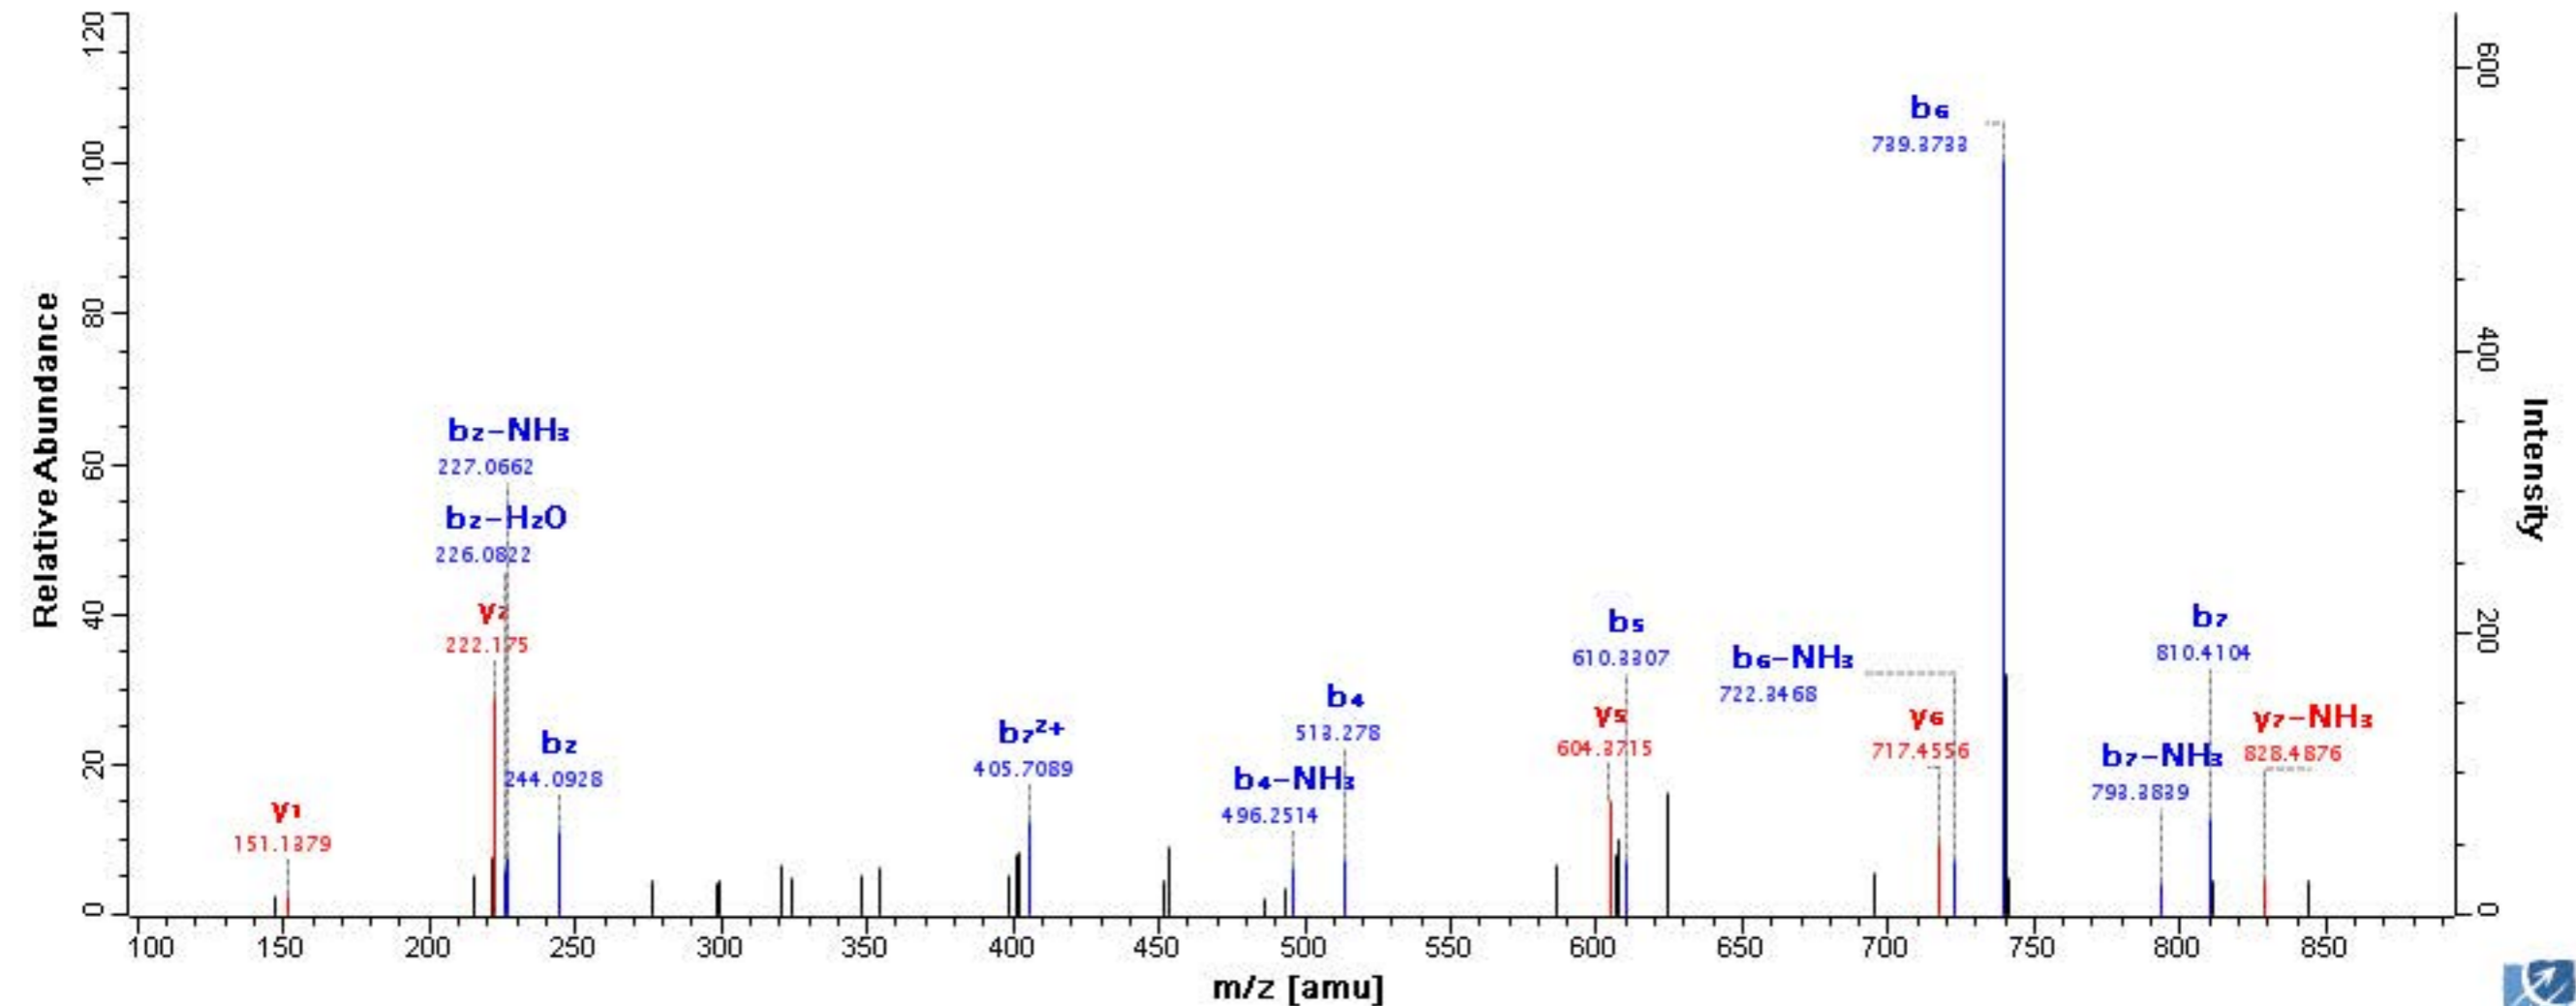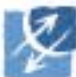

**precursor information**

|                       |                     |
|-----------------------|---------------------|
| Mass:                 | 959.53381           |
| m/z:                  | System.Collections. |
| Charge:               | System.Collections. |
| Retentiontime:        | System.Collections. |
| Score:                | 111.1672            |
| Mass Error [ppm]:     | 0.010896            |
| g PEP:                | 0.0035053           |
| Annotation:           | 7 of 8              |
| AminoAcids Coverage:  | 88 %                |
| Intensity Coverage:   | 57 %                |
| Protein Localisation: | 464 ... 471         |

| b <sup>2+</sup> ion |              | b ion      |              |     | y ion |          |                         |
|---------------------|--------------|------------|--------------|-----|-------|----------|-------------------------|
| Δ dalton            | mass         | Δ dalton   | mass         | seq |       | Δ dalton | mass                    |
|                     | 116.0342195  |            | 116.0342195  | 1   | D     | 7        |                         |
|                     | 244.09279701 | +0.0329812 | 244.09279701 | 2   | Q     | 6        | 845.51413441            |
|                     | 357.17686099 |            | 357.17686099 | 3   | I     | 5        | 717.4555569 +0.1963596  |
|                     | 513.27797202 | +0.010297  | 513.27797202 | 4   | R     | 4        | 604.37149292 +0.1227698 |
|                     | 610.33073587 | -0.1408555 | 610.33073587 | 5   | P     | 3        | 448.27038189            |
|                     | 739.37332897 | -0.0272596 | 739.37332897 | 6   | E     | 2        | 351.21761804            |
| -0.1317722          | 405.70885961 | +0.0712467 | 810.41044275 | 7   | A     | 1        | 222.17502494 +0.0065699 |
|                     |              |            |              | 8   | K     | 0        | 151.13791115 +0.251661  |

Source: 20120508\_VR\_Bsu\_TripleSILACrep1\_pT1L1T2\_F13  
 Scannumber: 6950  
 Protein: BSU09640; yhdY  
 Peptide Score: 190.53  
 Method: ITMS; CID; 3

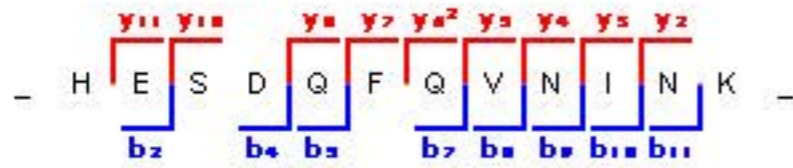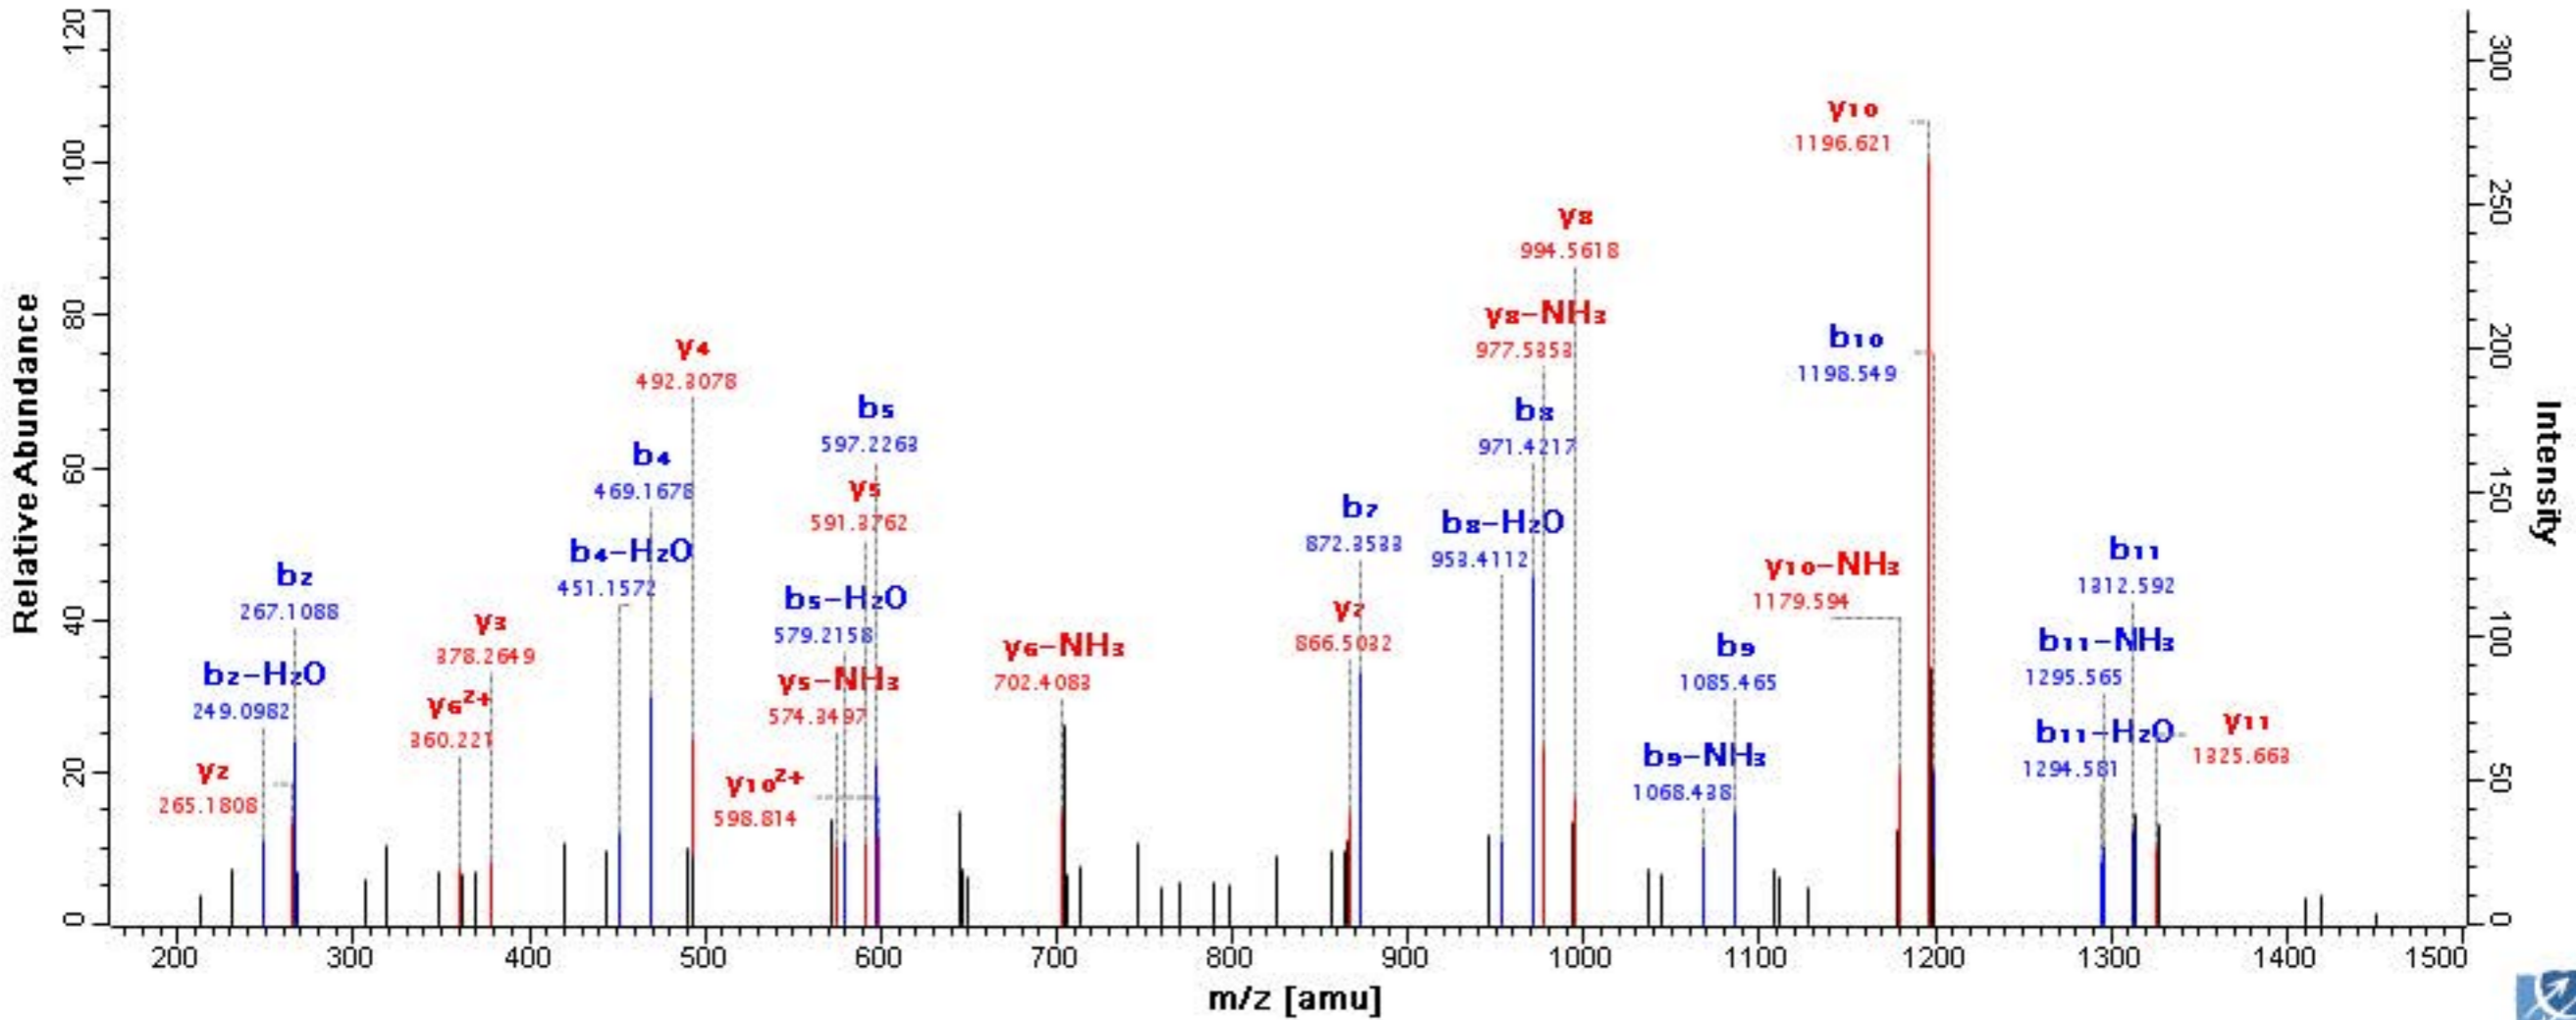

#### precursor information

|                   |                     |
|-------------------|---------------------|
| Mass:             | 1457.68986          |
| m/z:              | System.Collections. |
| Charge:           | System.Collections. |
| Retentiontime:    | System.Collections. |
| Score:            | 190.531             |
| Mass Error [ppm]: | -0.031783           |
| PEP:              | 2.3837E-45          |
| Precursor Type:   | MULTI               |

#### general information

|                       |             |
|-----------------------|-------------|
| Annotation:           | 10 of 12    |
| AminoAcids Coverage:  | 83 %        |
| Intensity Coverage:   | 58 %        |
| Protein Localisation: | 354 ... 365 |

| b ion      |              |    |     |    | γ ion        |            | γ <sup>2+</sup> ion |            |
|------------|--------------|----|-----|----|--------------|------------|---------------------|------------|
| Δ dalton   | mass         |    | seq |    | Δ dalton     | mass       | Δ dalton            | mass       |
|            | 138.06618833 | 1  | H   | 11 |              |            |                     |            |
| +0.1166214 | 267.10878143 | 2  | E   | 10 | 1325.6633774 | +0.0937027 | 1325.6633774        |            |
|            | 354.14080984 | 3  | S   | 9  | 1196.6207843 | +0.0991864 | 598.8140304         | -0.4666793 |
| -0.1110512 | 469.16775287 | 4  | D   | 8  | 1109.5887559 |            | 1109.5887559        |            |
| +0.1148561 | 597.22633038 | 5  | Q   | 7  | 994.56181288 | +0.0382237 | 994.56181288        |            |
|            | 744.29474429 | 6  | F   | 6  | 866.50323537 | +0.0029292 | 866.50323537        |            |
| -0.0331314 | 872.35332181 | 7  | Q   | 5  | 719.43482146 |            | 360.22104896        | -0.1318766 |
| +0.117632  | 971.42173572 | 8  | V   | 4  | 591.37624395 | -0.3563465 | 591.37624395        |            |
| +0.0848974 | 1085.4646632 | 9  | N   | 3  | 492.30783003 | +0.0163887 | 492.30783003        |            |
| +0.2054232 | 1198.5487271 | 10 | I   | 2  | 378.26490258 | +0.0361228 | 378.26490258        |            |
| +0.0400593 | 1312.5916546 | 11 | N   | 1  | 265.1808386  | +0.1373377 | 265.1808386         |            |
|            |              | 12 | K   | 0  | 151.13791115 |            | 151.13791115        |            |

Source: 20120508\_VR\_Bsu\_TripleSILACrep1\_pT1L1T2\_F14  
 Scannumber: 4008  
 Protein: BSU31650; mrpF; yufC  
 Peptide Score: 101.65  
 Method: ITMS; CID; 3

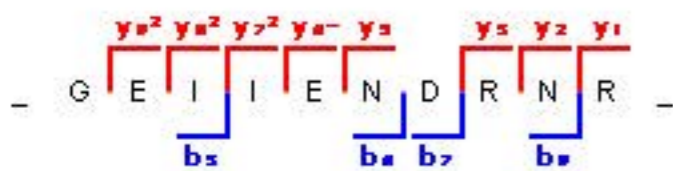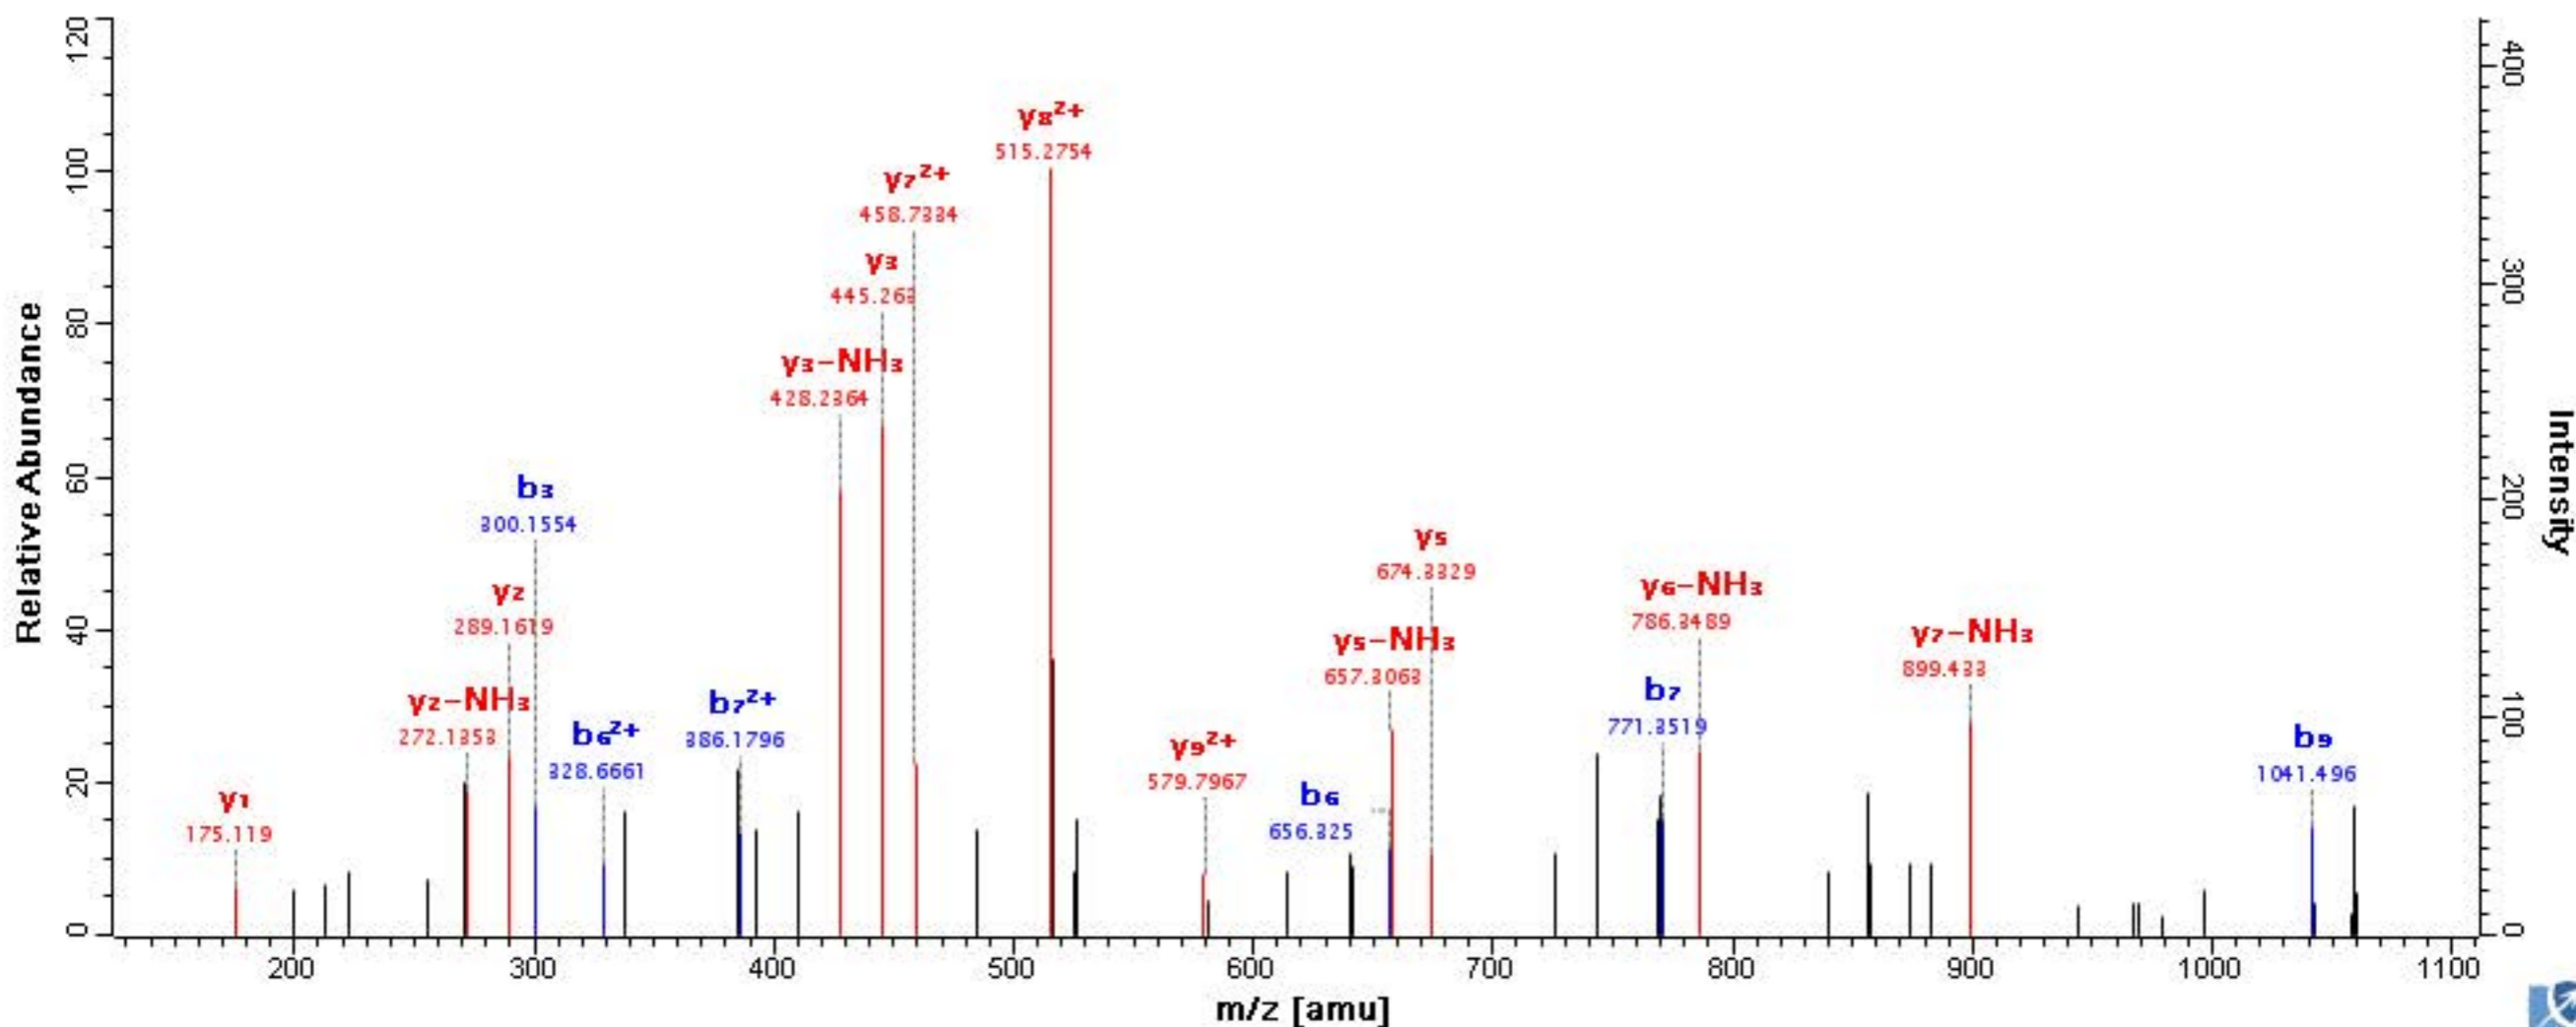

#### precursor information

|                   |                     |
|-------------------|---------------------|
| Mass:             | 1214.6              |
| m/z:              | System.Collections. |
| Charge:           | System.Collections. |
| Retentiontime:    | System.Collections. |
| Score:            | 101.6462            |
| Mass Error [ppm]: | -0.29569            |
| PEP:              | 0.0013278           |
| Precursor Type:   | ISO                 |

#### general information

|                       |           |
|-----------------------|-----------|
| Annotation:           | 9 of 10   |
| AminoAcids Coverage:  | 90 %      |
| Intensity Coverage:   | 55 %      |
| Protein Localisation: | 85 ... 94 |

| b <sup>2+</sup> ion |          | b ion     |          |     | y ion |          | y <sup>2+</sup> ion |           |          |
|---------------------|----------|-----------|----------|-----|-------|----------|---------------------|-----------|----------|
| Δ dalton            | mass     | Δ dalton  | mass     | seq |       | Δ dalton | mass                | Δ dalton  | mass     |
|                     | 58.02874 |           | 58.02874 | 1   | G     | 9        |                     |           |          |
|                     | 187.0713 |           | 187.0713 | 2   | E     | 8        | 1158.586            |           | 579.7967 |
|                     | 300.1554 | +0.018095 | 300.1554 | 3   | I     | 7        | 1029.544            |           | 515.2754 |
|                     | 413.2395 |           | 413.2395 | 4   | I     | 6        | 916.4595            |           | 458.7334 |
|                     | 542.2821 |           | 542.2821 | 5   | E     | 5        | 803.3755            |           | 803.3755 |
| +0.478036           | 328.6661 | -0.030914 | 656.325  | 6   | N     | 4        | 674.3329            | +0.009729 | 674.3329 |
| -0.081639           | 386.1796 | -0.416439 | 771.3519 | 7   | D     | 3        | 560.2899            |           | 560.2899 |
|                     | 927.453  |           | 927.453  | 8   | R     | 2        | 445.263             | -0.000662 | 445.263  |
|                     | 1041.496 | -0.150626 | 1041.496 | 9   | N     | 1        | 289.1619            | +0.054246 | 289.1619 |
|                     |          |           |          | 10  | R     | 0        | 175.119             | +0.013036 | 175.119  |

Source: 20120508\_VR\_Bsu\_TripleSILACrep1\_pT1 L1 T2\_F21  
 Scannumber: 10591  
 Protein: BSU16250; cheF; flj  
 Peptide Score: 167.28  
 Method: ITMS; CID; 3

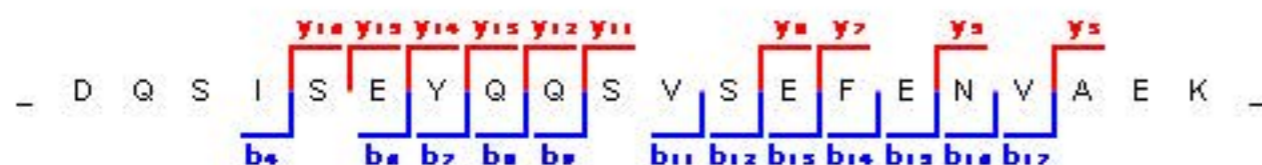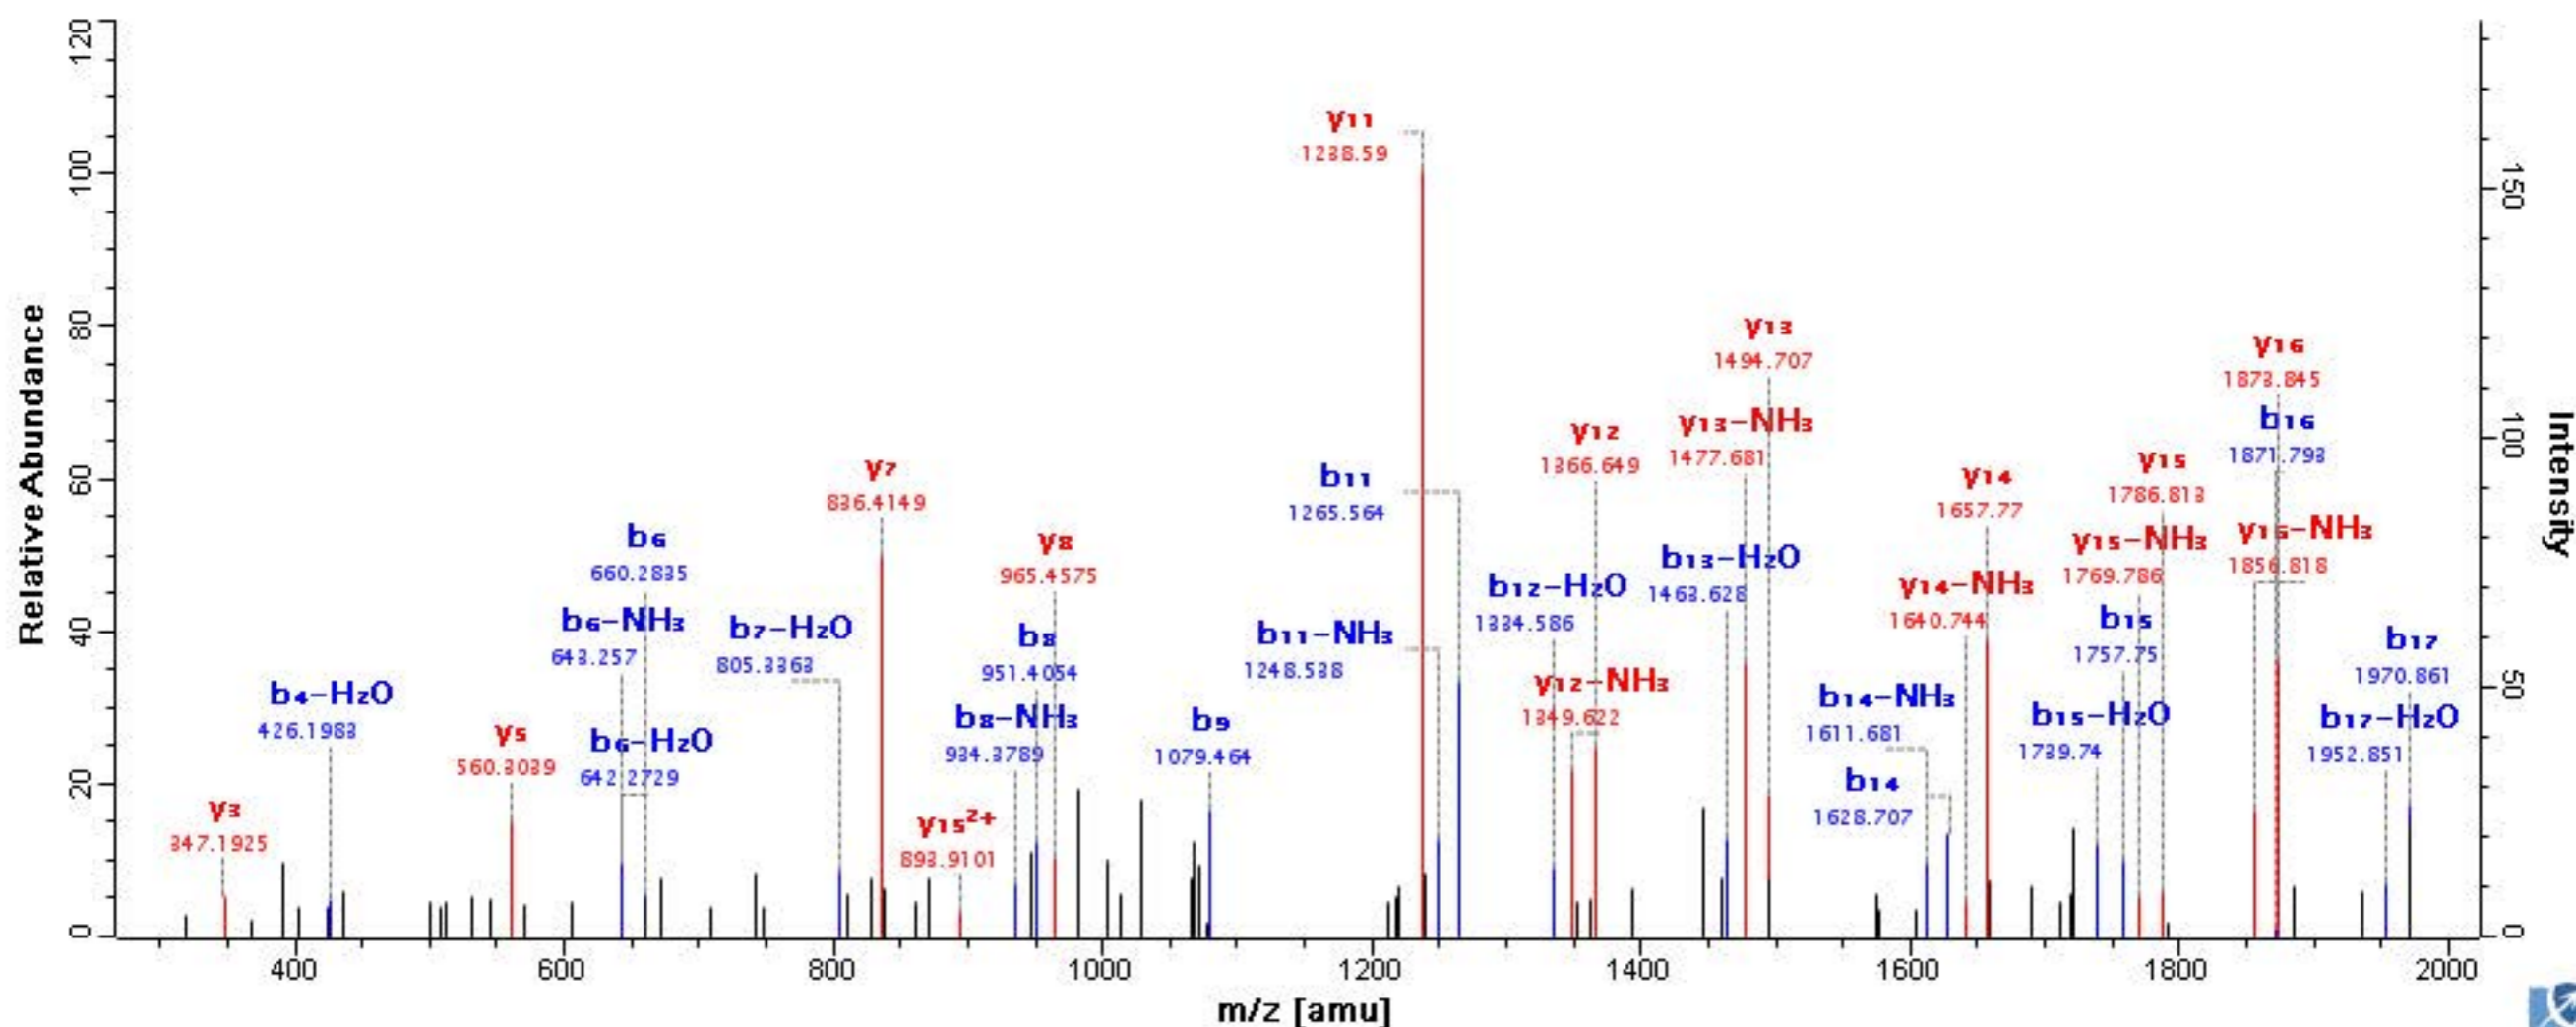

#### precursor information

|                   |                     |
|-------------------|---------------------|
| Mass:             | 2316.04154          |
| m/z:              | System.Collections. |
| Charge:           | System.Collections. |
| Retentiontime:    | System.Collections. |
| Score:            | 167.2807            |
| Mass Error [ppm]: | 0.9405              |
| PEP:              | 1.1492E-45          |
| Precursor Type:   | ISO                 |

| b ion      |              |    |     |    | y ion        |            | y <sup>2+</sup> ion |           |
|------------|--------------|----|-----|----|--------------|------------|---------------------|-----------|
| Δ dalton   | mass         |    | seq |    | Δ dalton     | mass       | Δ dalton            | mass      |
|            | 116.0342195  | 1  | D   | 19 |              |            |                     |           |
|            | 244.09279701 | 2  | Q   | 18 | 2202.0196982 |            | 2202.0196982        |           |
|            | 331.12482542 | 3  | S   | 17 | 2073.9611207 |            | 2073.9611207        |           |
|            | 444.2088894  | 4  | I   | 16 | 1986.9290923 |            | 1986.9290923        |           |
|            | 531.24091781 | 5  | S   | 15 | 1873.8450283 | +0.1615635 | 1873.8450283        |           |
| +0.086118  | 660.28351091 | 6  | E   | 14 | 1786.8129999 | +0.1247442 | 893.91013819        | +0.041644 |
|            | 823.34683944 | 7  | Y   | 13 | 1657.7704068 | +0.0912875 | 1657.7704068        |           |
| +0.143167  | 951.40541696 | 8  | Q   | 12 | 1494.7070783 | +0.1275164 | 1494.7070783        |           |
| +0.1768747 | 1079.4639945 | 9  | Q   | 11 | 1366.6485008 | +0.2411477 | 1366.6485008        |           |
|            | 1166.4960229 | 10 | S   | 10 | 1238.5899233 | -0.0325502 | 1238.5899233        |           |
| +0.0962077 | 1265.5644368 | 11 | V   | 9  | 1151.5578949 |            | 1151.5578949        |           |
|            | 1352.5964652 | 12 | S   | 8  | 1052.4894809 |            | 1052.4894809        |           |
|            | 1481.6390583 | 13 | E   | 7  | 965.45745253 | -0.0387514 | 965.45745253        |           |
| -0.1072525 | 1628.7074722 | 14 | F   | 6  | 836.41485943 | -0.0359532 | 836.41485943        |           |
| +0.3253741 | 1757.7500653 | 15 | E   | 5  | 689.34644551 |            | 689.34644551        |           |
| +0.1374272 | 1871.7929928 | 16 | N   | 4  | 560.30385242 | +0.0975148 | 560.30385242        |           |
| -0.1829399 | 1970.8614067 | 17 | V   | 3  | 446.26092497 |            | 446.26092497        |           |
|            | 2041.8985205 | 18 | A   | 2  | 347.19251105 | +0.0618835 | 347.19251105        |           |
|            | 2170.9411136 | 19 | E   | 1  | 276.15539727 |            | 276.15539727        |           |
|            |              | 20 | K   | 0  | 147.11280417 |            | 147.11280417        |           |

#### general information

|                       |           |
|-----------------------|-----------|
| Annotation:           | 15 of 20  |
| AminoAcids Coverage:  | 75 %      |
| Intensity Coverage:   | 62 %      |
| Protein Localisation: | 19 ... 38 |

Source: 20120508\_VR\_Bsu\_TripleSILACrep1\_pT1L1T2\_F21  
 Scannumber: 12082  
 Protein: bbmA; BSU34620; yvdF  
 Peptide Score: 128.26  
 Method: ITMS; CID; 3

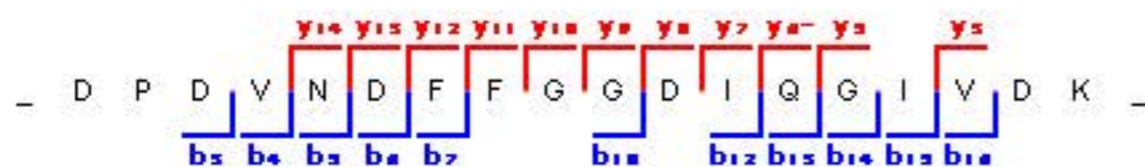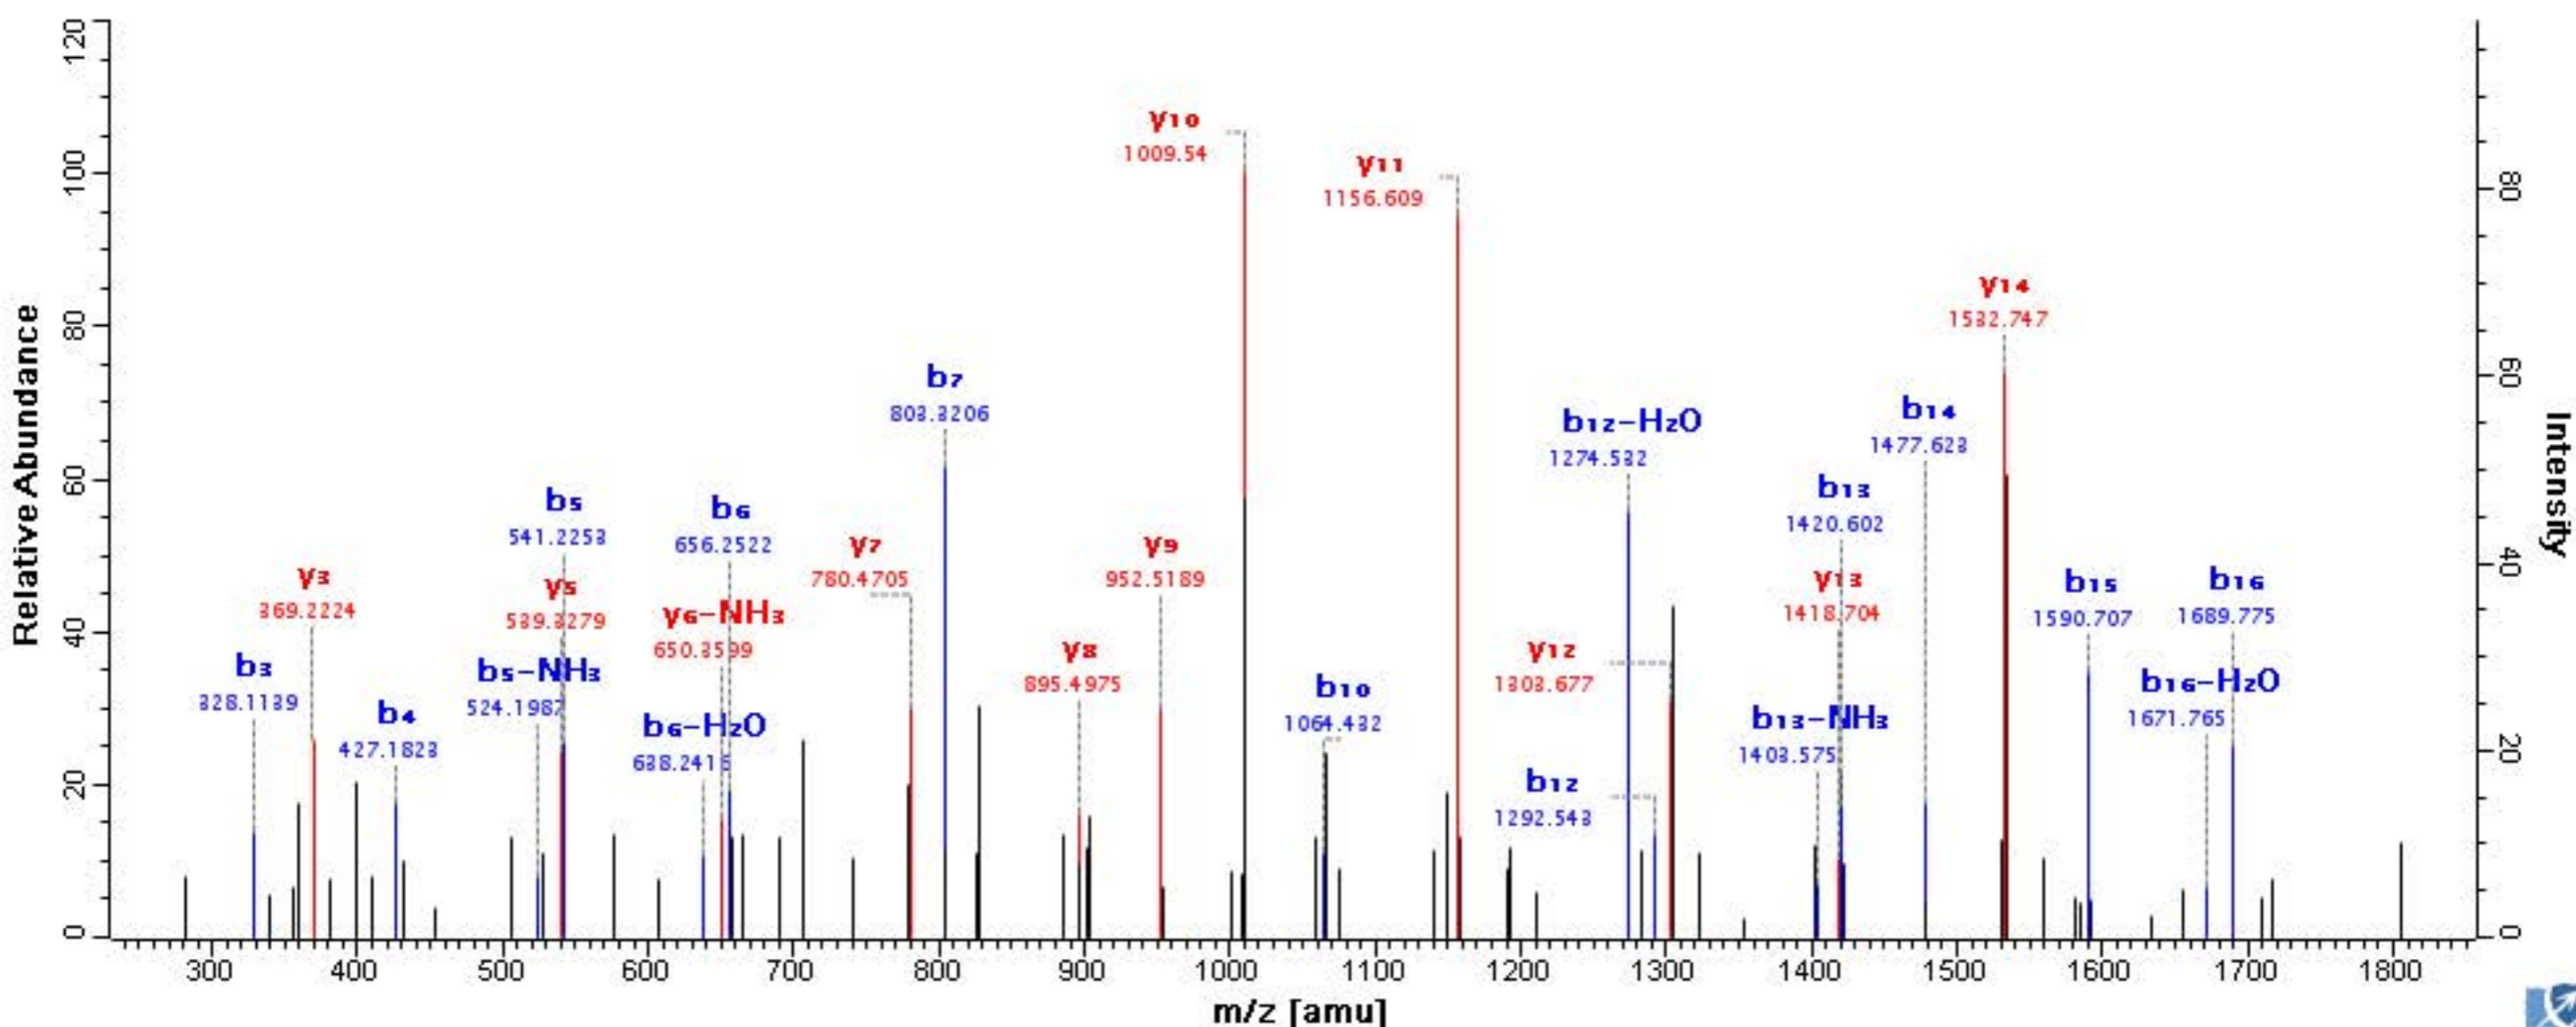

#### precursor information

|                   |                     |
|-------------------|---------------------|
| Mass:             | 1949.90082          |
| m/z:              | System.Collections. |
| Charge:           | System.Collections. |
| Retentiontime:    | System.Collections. |
| Score:            | 128.2604            |
| Mass Error [ppm]: | 0.066286            |
| PEP:              | 4.4885E-11          |
| Precursor Type:   | MULTI               |

#### general information

|                       |             |
|-----------------------|-------------|
| Annotation:           | 14 of 18    |
| AminoAcids Coverage:  | 78 %        |
| Intensity Coverage:   | 50 %        |
| Protein Localisation: | 166 ... 183 |

| b ion      |                | seq |   | y ion          |            |
|------------|----------------|-----|---|----------------|------------|
| Δ dalton   | mass           |     |   | Δ dalton       | mass       |
|            | 116.034219499  | 1   | D |                |            |
|            | 213.086983351  | 2   | P | 1843.895218719 |            |
| +0.1192279 | 328.113926383  | 3   | D | 1746.842454867 |            |
| -0.0317666 | 427.182340299  | 4   | V | 1631.815511835 |            |
| -0.0839103 | 541.225267746  | 5   | N | 1532.747097919 | -0.1039094 |
| +0.0753039 | 656.252210778  | 6   | D | 1418.704170471 | +0.2461469 |
| +0.0670706 | 803.320624694  | 7   | F | 1303.677227439 | +0.1605411 |
|            | 950.38903861   | 8   | F | 1156.608813523 | +0.2818115 |
|            | 1007.410502334 | 9   | G | 1009.540399607 | +0.1091976 |
| +0.0870769 | 1064.431966058 | 10  | G | 952.518935883  | +0.1246798 |
|            | 1179.45890909  | 11  | D | 895.49747216   | +0.2028452 |
| -0.0008588 | 1292.54297307  | 12  | I | 780.470529128  | +0.0955109 |
| +0.2076535 | 1420.601550581 | 13  | Q | 667.386465147  |            |
| -0.0524577 | 1477.623014305 | 14  | G | 539.327887636  | +0.1688775 |
| +0.2699725 | 1590.707078285 | 15  | I | 482.306423912  |            |
| +0.0588584 | 1689.775492202 | 16  | V | 369.22359932   | +0.2295138 |
|            | 1804.802435234 | 17  | D | 270.153946016  |            |
|            |                | 18  | K | 155.127002984  |            |

Source: 20120508\_VR\_Bsu\_TripleSILACrep1\_pT1L1T2\_F21  
 Scannumber: 8126  
 Protein: BSU26420; yrkQ  
 Peptide Score: 113.29  
 Method: ITMS; CID; 3

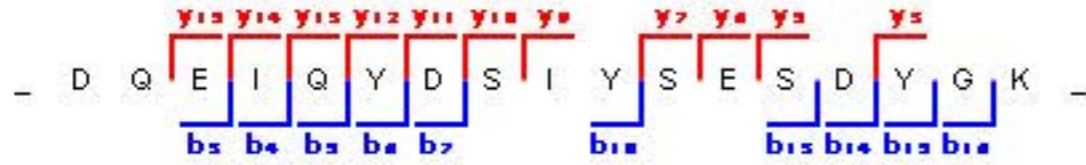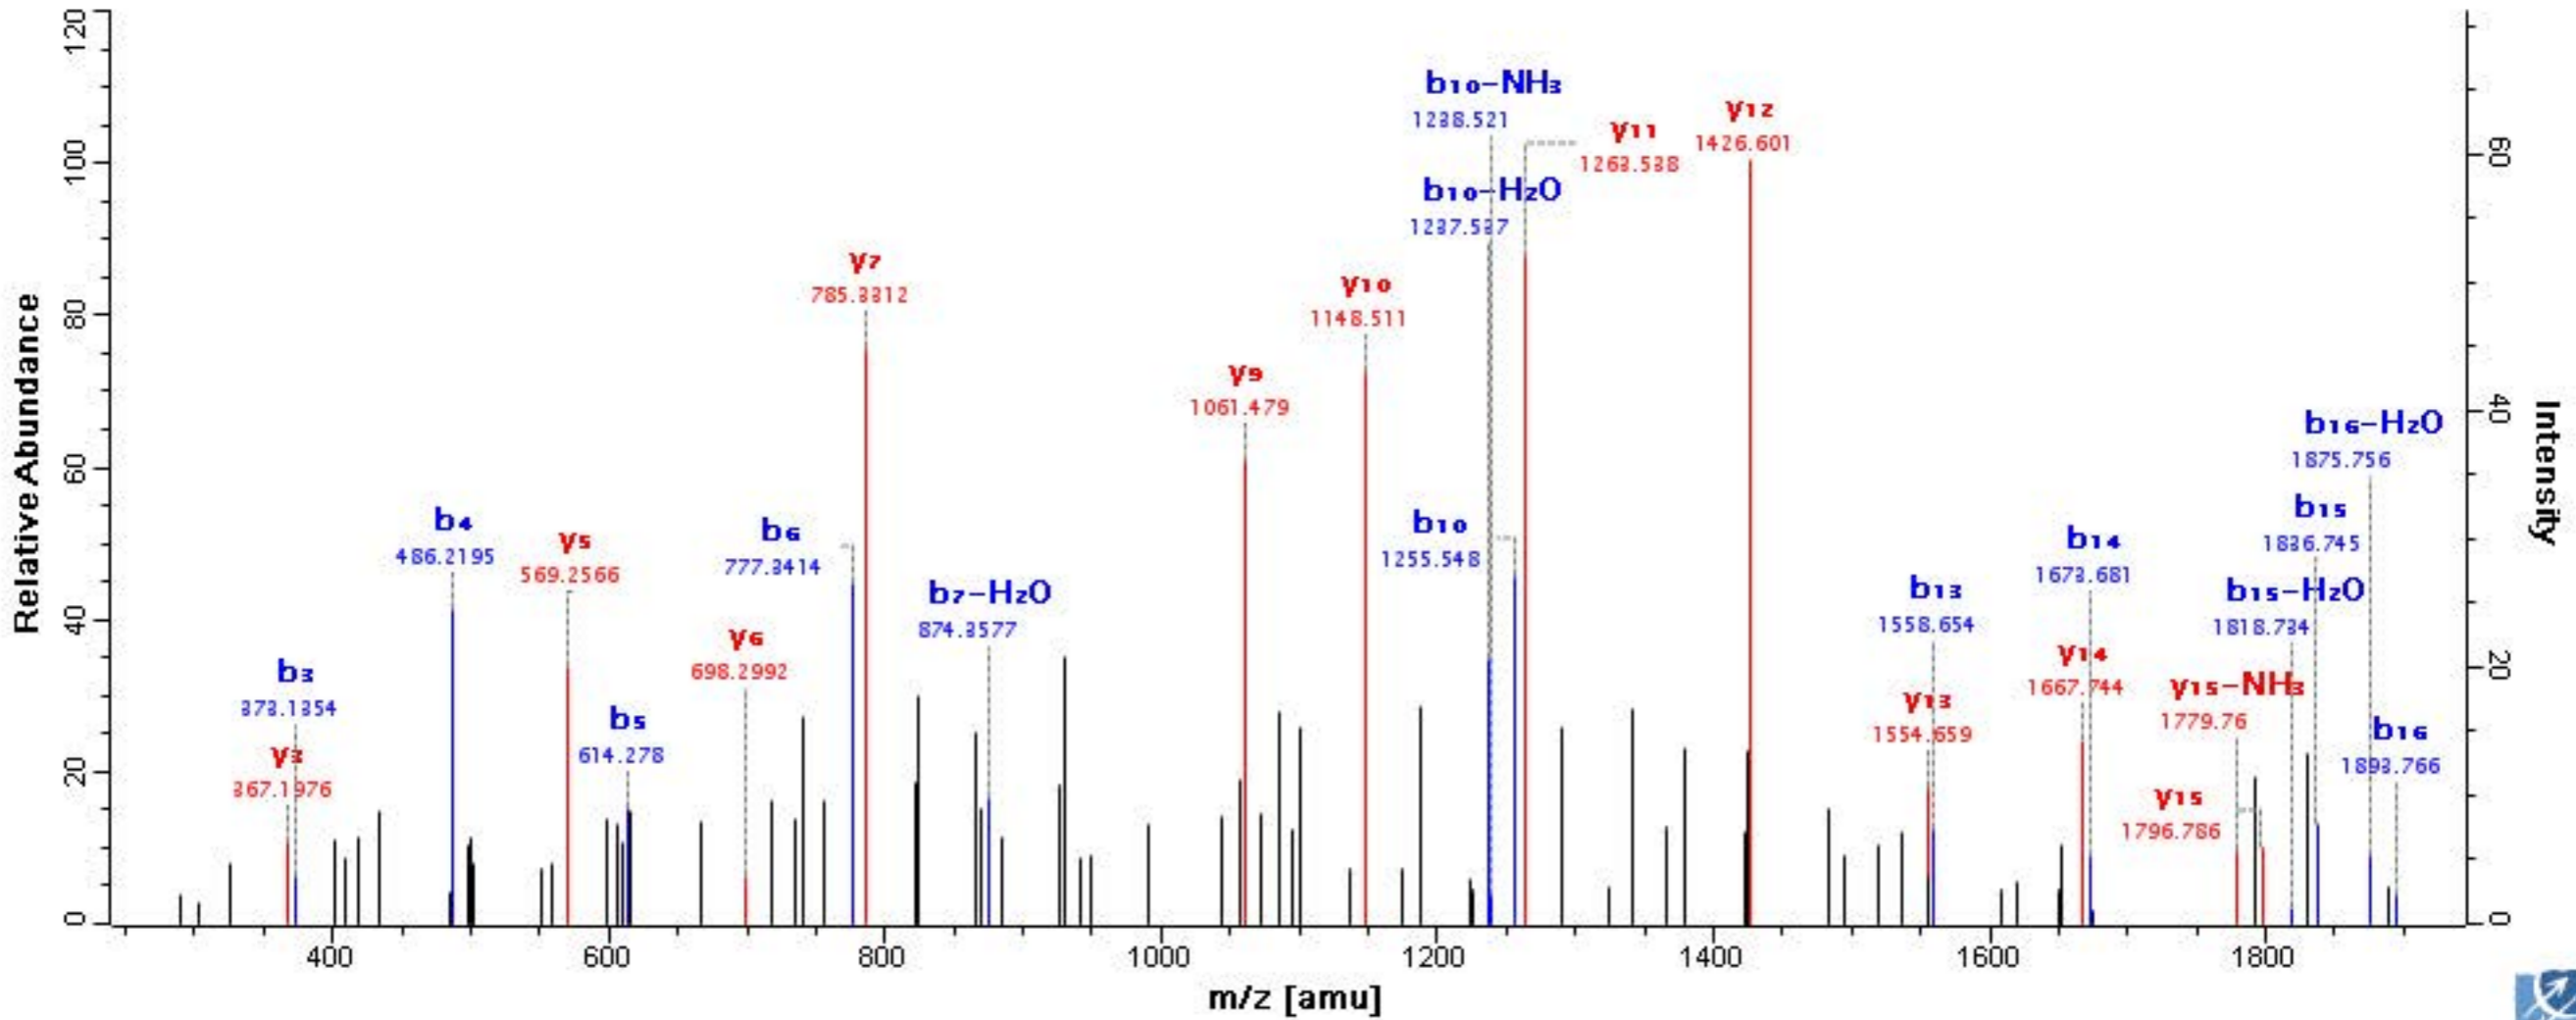

#### precursor information

|                   |                     |
|-------------------|---------------------|
| Mass:             | 0                   |
| m/z:              | System.Collections. |
| Charge:           | System.Collections. |
| Retentiontime:    | System.Collections. |
| Score:            | 113.2877            |
| Mass Error [ppm]: | -3.3026             |
| PEP:              | 5.0875E-22          |
| Precursor Type:   | PEAK                |

#### general information

|                       |            |
|-----------------------|------------|
| Annotation:           | 14 of 17   |
| AminoAcids Coverag    | 82 %       |
| Intensity Coverage:   | 47 %       |
| Protein Localisation: | 93 ... 109 |

| b ion      |                |    |     |    |                | y ion      |  |
|------------|----------------|----|-----|----|----------------|------------|--|
| Δ dalton   | mass           |    | seq |    | Δ dalton       | mass       |  |
|            | 116.034219499  | 1  | D   | 16 |                |            |  |
|            | 244.09279701   | 2  | Q   | 15 | 1924.844693979 |            |  |
| -0.1228169 | 373.135390106  | 3  | E   | 14 | 1796.786116467 | +0.266862  |  |
| -0.1230796 | 486.219454087  | 4  | I   | 13 | 1667.743523371 | +0.0664132 |  |
| -0.1299603 | 614.278031598  | 5  | Q   | 12 | 1554.659459391 | +0.1966197 |  |
| -0.1227932 | 777.341360136  | 6  | Y   | 11 | 1426.600881879 | +0.0738007 |  |
|            | 892.368303168  | 7  | D   | 10 | 1263.537553341 | -0.0597701 |  |
|            | 979.400331578  | 8  | S   | 9  | 1148.510610309 | +0.0451758 |  |
|            | 1092.484395559 | 9  | I   | 8  | 1061.478581899 | +0.2372384 |  |
| +0.1618706 | 1255.547724097 | 10 | Y   | 7  | 948.394517919  |            |  |
|            | 1342.579752507 | 11 | S   | 6  | 785.33118938   | +0.1882198 |  |
|            | 1471.622345603 | 12 | E   | 5  | 698.299160971  | -0.2101717 |  |
| +0.2368613 | 1558.654374013 | 13 | S   | 4  | 569.256567874  | +0.017541  |  |
| -0.4180114 | 1673.681317045 | 14 | D   | 3  | 482.224539464  |            |  |
| +0.1597734 | 1836.744645583 | 15 | Y   | 2  | 367.197596432  | +0.2442981 |  |
| +0.1374551 | 1893.766109307 | 16 | G   | 1  | 204.134267894  |            |  |
|            |                | 17 | K   | 0  | 147.112804171  |            |  |

Source: 201 20510\_VR\_Bsu\_TripleSILACrep1\_T1 L1 T2\_OG\_F01  
 Scannumber: 8926  
 Protein: BSU27630; yrvD  
 Peptide Score: 104.84  
 Method: ITMS; CID; 3

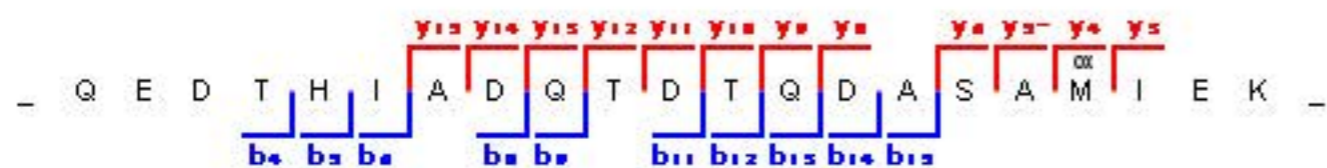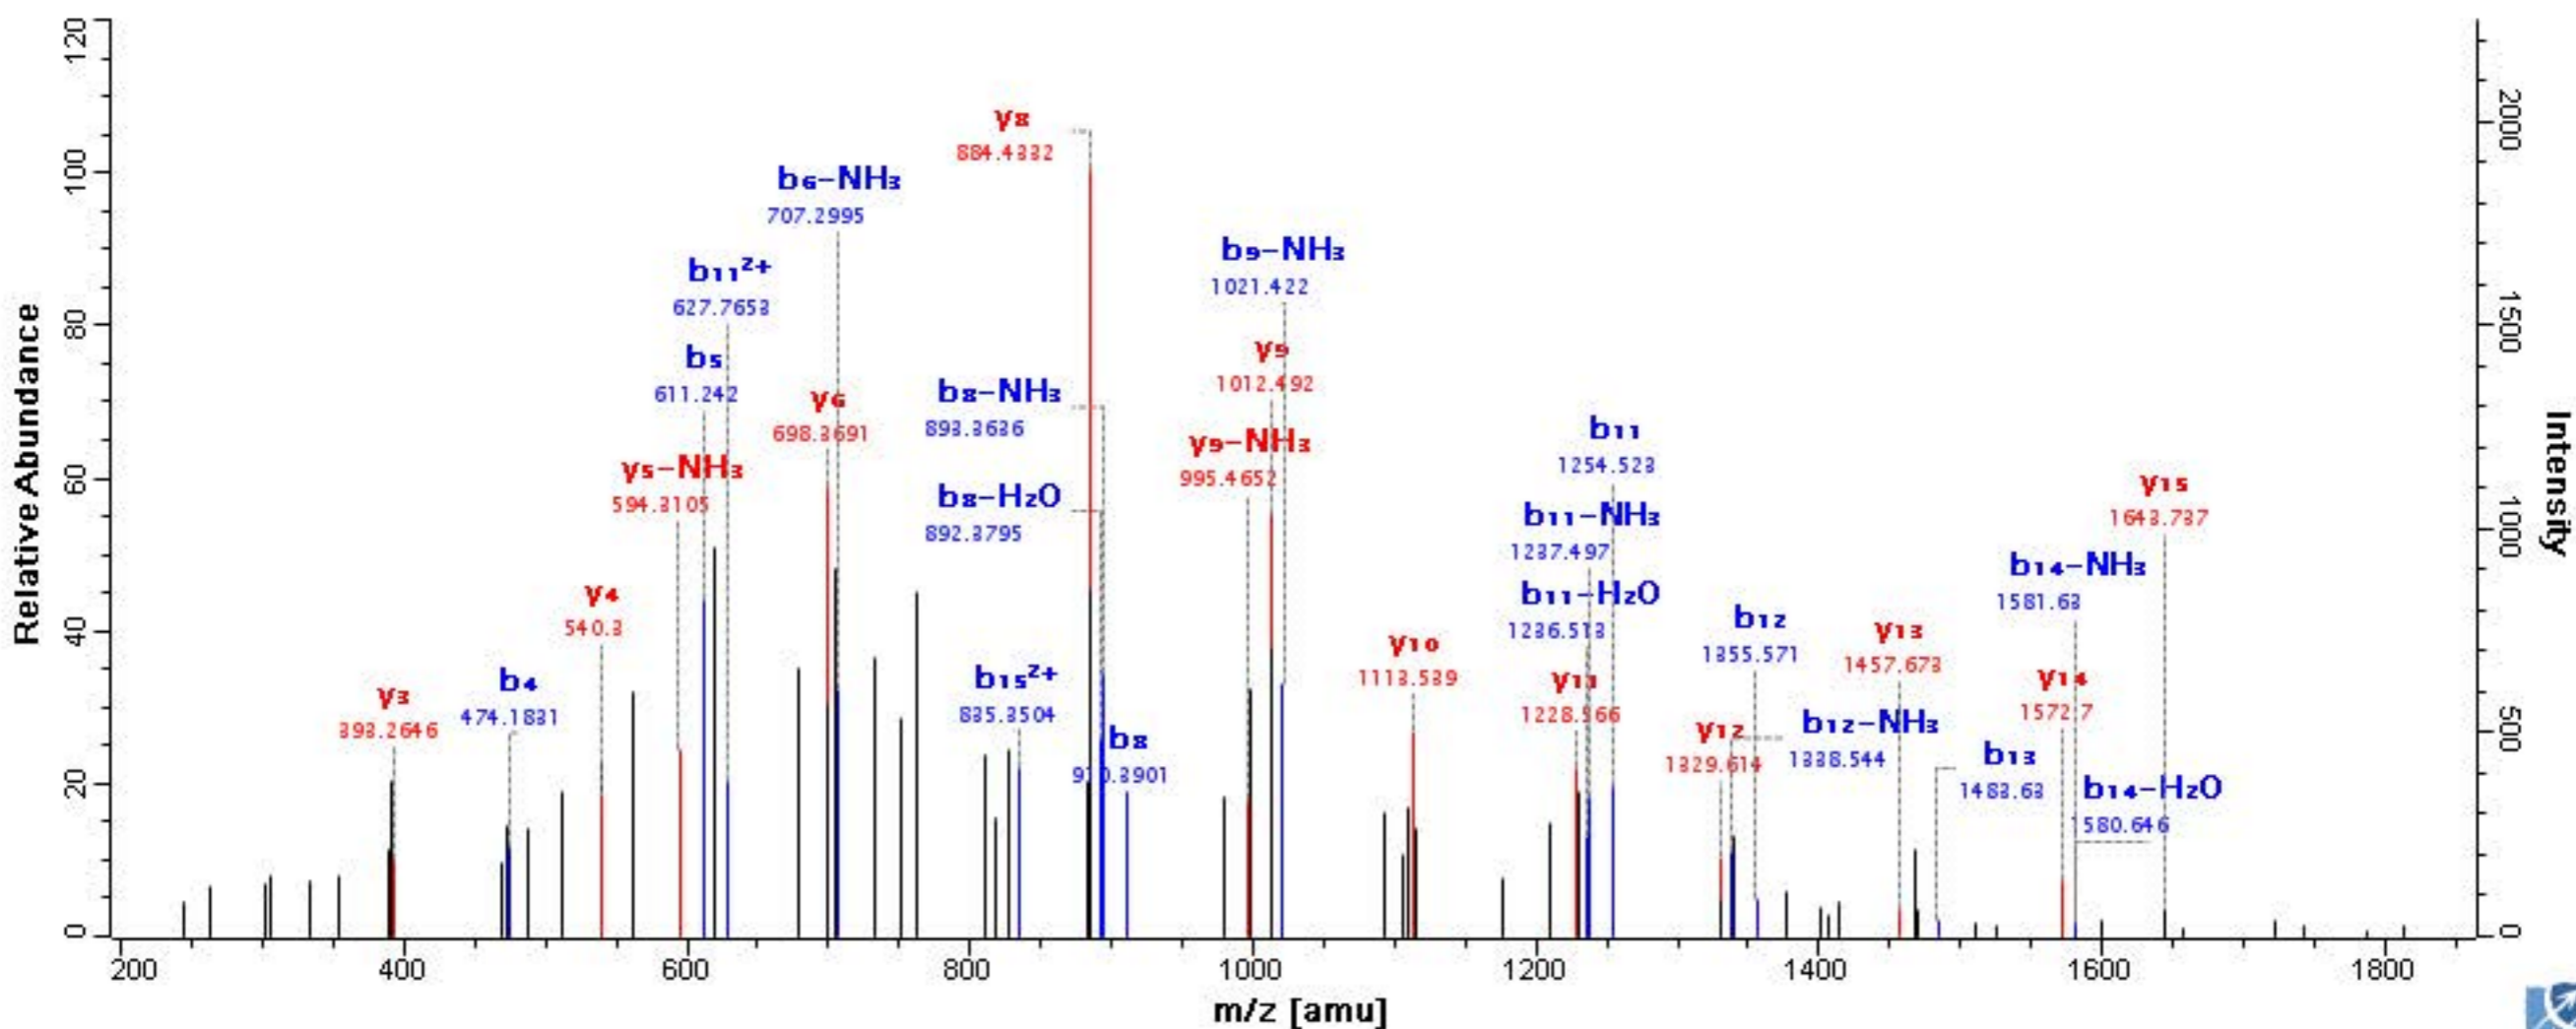

#### precursor information

|                   |                     |
|-------------------|---------------------|
| Mass:             | 2362.0218           |
| m/z:              | System.Collections. |
| Charge:           | System.Collections. |
| Retentiontime:    | System.Collections. |
| Score:            | 104.8373            |
| Mass Error [ppm]: | -0.53299            |
| PEP:              | 1.5101E-12          |
| Precursor Type:   | MULTI               |

#### general information

|                       |            |
|-----------------------|------------|
| Annotation:           | 16 of 21   |
| AminoAcids Coverag    | 76 %       |
| Intensity Coverage:   | 43 %       |
| Protein Localisation: | 85 ... 105 |

| b <sup>2+</sup> ion |              | b ion      |              |    |     | γ ion |              |            |
|---------------------|--------------|------------|--------------|----|-----|-------|--------------|------------|
| Δ dalton            | mass         | Δ dalton   | mass         |    | seq |       | Δ dalton     | mass       |
|                     | 129.06585398 |            | 129.06585398 | 1  | Q   | 20    |              |            |
|                     | 258.10844707 |            | 258.10844707 | 2  | E   | 19    | 2238.9968687 |            |
|                     | 373.13539011 |            | 373.13539011 | 3  | D   | 18    | 2109.9542756 |            |
|                     | 474.18306858 | +0.0707766 | 474.18306858 | 4  | T   | 17    | 1994.9273326 |            |
|                     | 611.24198044 | -0.0302495 | 611.24198044 | 5  | H   | 16    | 1893.8796541 |            |
|                     | 724.32604442 |            | 724.32604442 | 6  | I   | 15    | 1756.8207423 |            |
|                     | 795.36315821 |            | 795.36315821 | 7  | A   | 14    | 1643.7366783 | +0.0892494 |
|                     | 910.39010124 | +0.0144398 | 910.39010124 | 8  | D   | 13    | 1572.6995645 | +0.0675253 |
|                     | 1038.4486788 |            | 1038.4486788 | 9  | Q   | 12    | 1457.6726215 | +0.0464947 |
|                     | 1139.4963572 |            | 1139.4963572 | 10 | T   | 11    | 1329.614044  | +0.2583926 |
| +0.2116403          | 627.76528836 | -0.0267182 | 1254.5233003 | 11 | D   | 10    | 1228.5663655 | +0.0006511 |
|                     | 1355.5709787 | +0.0766043 | 1355.5709787 | 12 | T   | 9     | 1113.5394225 | +0.0350404 |
|                     | 1483.6295562 | +0.3280854 | 1483.6295562 | 13 | Q   | 8     | 1012.491744  | -0.0444173 |
|                     | 1598.6564993 |            | 1598.6564993 | 14 | D   | 7     | 884.43316648 | +0.0020752 |
| +0.1773873          | 835.35044477 |            | 1669.6936131 | 15 | A   | 6     | 769.40622344 |            |
|                     | 1756.7256415 |            | 1756.7256415 | 16 | S   | 5     | 698.36910966 | -0.0663753 |
|                     | 1827.7627553 |            | 1827.7627553 | 17 | A   | 4     | 611.33708125 |            |
|                     | 1974.7981545 |            | 1974.7981545 | 18 | M   | 3     | 540.29996746 | +0.1120809 |
|                     | 2087.8822185 |            | 2087.8822185 | 19 | I   | 2     | 393.26456823 | +0.0458261 |
|                     | 2216.9248116 |            | 2216.9248116 | 20 | E   | 1     | 280.18050425 |            |
|                     |              |            |              | 21 | K   | 0     | 151.13791115 |            |



Source: 20120510\_VR\_Bsu\_TripleSILACrep1\_T1L1T2\_OG\_F01  
 Scannumber: 9418  
 Protein: BSU17880; ynzC  
 Peptide Score: 108.56  
 Method: ITMS; CID; 3

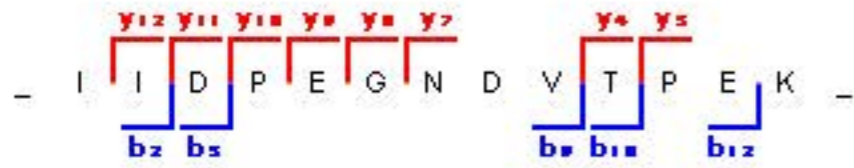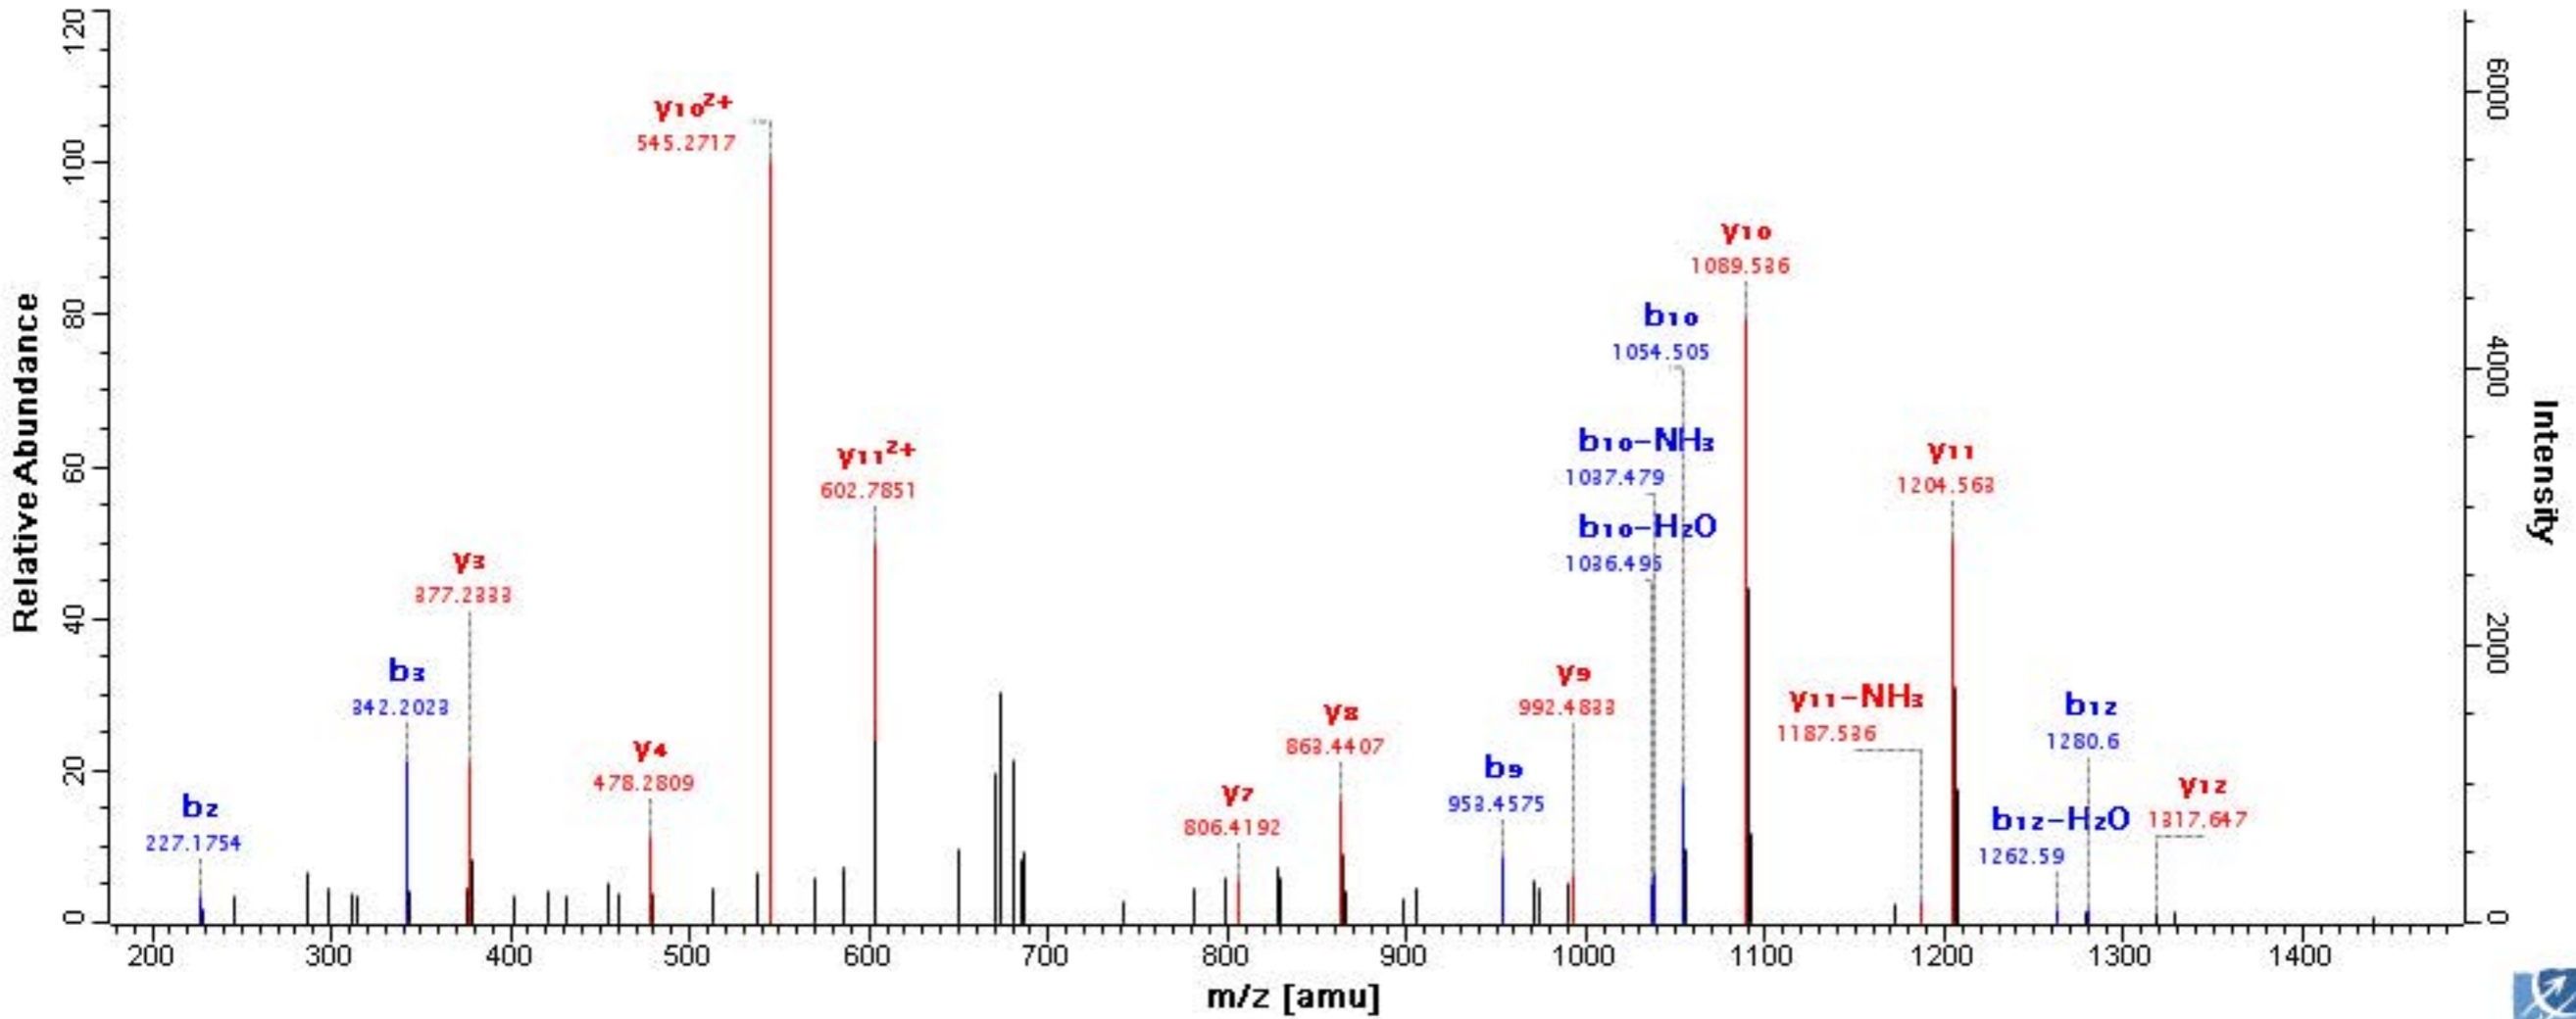

#### precursor information

|                   |                     |
|-------------------|---------------------|
| Mass:             | 1429.72455          |
| m/z:              | System.Collections. |
| Charge:           | System.Collections. |
| Retentiontime:    | System.Collections. |
| Score:            | 108.5638            |
| Mass Error [ppm]: | 0.48965             |
| PEP:              | 0.00015696          |
| Precursor Type:   | ISO                 |

#### general information

|                       |           |
|-----------------------|-----------|
| Annotation:           | 10 of 13  |
| AminoAcids Coverag    | 77 %      |
| Intensity Coverage:   | 50 %      |
| Protein Localisation: | 54 ... 66 |

| b ion      |              |    |     |    | y ion        |            |              |            | y <sup>2+</sup> ion |  |
|------------|--------------|----|-----|----|--------------|------------|--------------|------------|---------------------|--|
| Δ dalton   | mass         |    | seq |    | Δ dalton     | mass       | Δ dalton     | mass       |                     |  |
|            | 114.09134045 | 1  | I   | 12 |              |            |              |            |                     |  |
| +0.1237136 | 227.17540443 | 2  | I   | 11 | 1317.6470587 | +0.2405146 | 1317.6470587 |            |                     |  |
| -0.0379798 | 342.20234746 | 3  | D   | 10 | 1204.5629947 | +0.0241635 | 602.78513557 | +0.0669762 |                     |  |
|            | 439.25511131 | 4  | P   | 9  | 1089.5360516 | +0.034505  | 545.27166406 | +0.3956943 |                     |  |
|            | 568.29770441 | 5  | E   | 8  | 992.48328779 | +0.2071419 | 992.48328779 |            |                     |  |
|            | 625.31916813 | 6  | G   | 7  | 863.4406947  | -0.0538539 | 863.4406947  |            |                     |  |
|            | 739.36209558 | 7  | N   | 6  | 806.41923097 | -0.0493579 | 806.41923097 |            |                     |  |
|            | 854.38903861 | 8  | D   | 5  | 692.37630352 |            | 692.37630352 |            |                     |  |
| +0.1416075 | 953.45745253 | 9  | V   | 4  | 577.34936049 |            | 577.34936049 |            |                     |  |
| +0.0657919 | 1054.505131  | 10 | T   | 3  | 478.28094658 | -0.0150774 | 478.28094658 |            |                     |  |
|            | 1151.5578949 | 11 | P   | 2  | 377.2332681  | +0.0224082 | 377.2332681  |            |                     |  |
| -0.0610592 | 1280.6004879 | 12 | E   | 1  | 280.18050425 |            | 280.18050425 |            |                     |  |
|            |              | 13 | K   | 0  | 151.13791115 |            | 151.13791115 |            |                     |  |

Source: 20120510\_VR\_Bsu\_TripleSILACrep1\_T1L1T2\_OG\_F02  
 Scannumber: 13263  
 Protein: BSU00140; dak; dck; yaaF  
 Peptide Score: 162.31  
 Method: ITMS; CID; 3

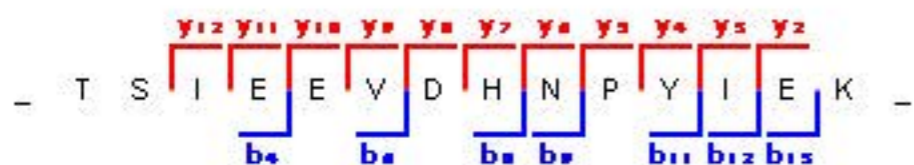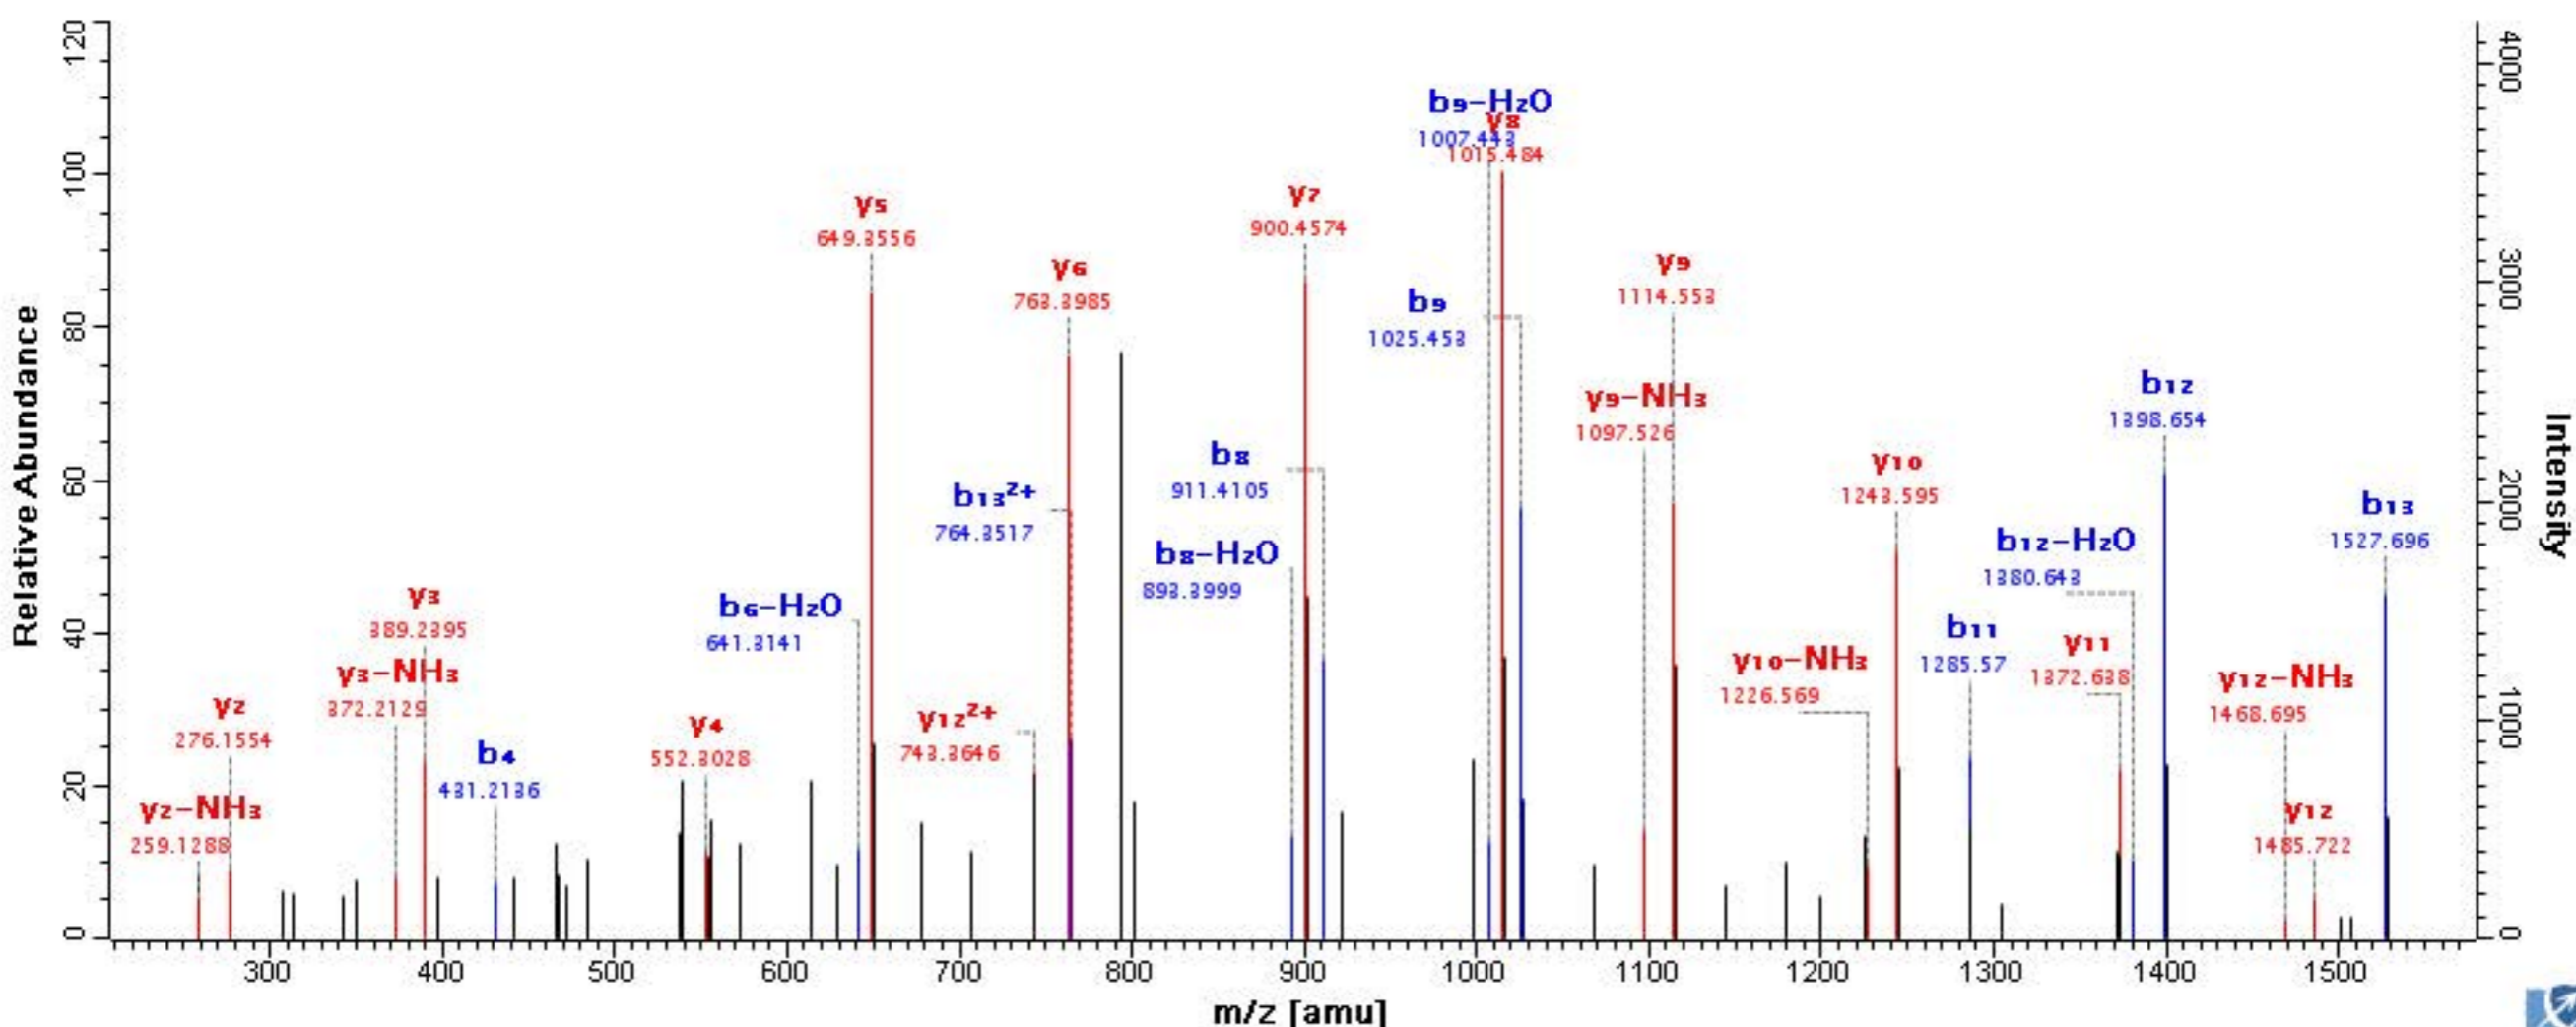

#### precursor information

|                   |                     |
|-------------------|---------------------|
| Mass:             | 1672.79286          |
| m/z:              | System.Collections. |
| Charge:           | System.Collections. |
| Retentiontime:    | System.Collections. |
| Score:            | 162.3062            |
| Mass Error [ppm]: | -0.93856            |
| PEP:              | 9.7344E-19          |
| Precursor Type:   | MULTI               |

#### general information

|                       |           |
|-----------------------|-----------|
| Annotation:           | 11 of 14  |
| AminoAcids Coverag    | 79 %      |
| Intensity Coverage:   | 54%       |
| Protein Localisation: | 37 ... 50 |

| b <sup>2+</sup> ion |          | b ion     |          |    |     |    | y ion    |           | y <sup>2+</sup> ion |           |
|---------------------|----------|-----------|----------|----|-----|----|----------|-----------|---------------------|-----------|
| Δ dalton            | mass     | Δ dalton  | mass     |    | seq |    | Δ dalton | mass      | Δ dalton            | mass      |
|                     | 102.055  |           | 102.055  | 1  | T   | 13 |          |           |                     |           |
|                     | 189.087  |           | 189.087  | 2  | S   | 12 | 1572.754 |           | 1572.754            |           |
|                     | 302.171  |           | 302.171  | 3  | I   | 11 | 1485.722 | +0.233688 | 743.3646            | +0.048142 |
|                     | 431.2136 | +0.059126 | 431.2136 | 4  | E   | 10 | 1372.638 | +0.062503 | 1372.638            |           |
|                     | 560.2562 |           | 560.2562 | 5  | E   | 9  | 1243.595 | -0.020758 | 1243.595            |           |
|                     | 659.3246 |           | 659.3246 | 6  | V   | 8  | 1114.553 | -0.018814 | 1114.553            |           |
|                     | 774.3516 |           | 774.3516 | 7  | D   | 7  | 1015.484 | +0.038735 | 1015.484            |           |
|                     | 911.4105 | +0.069783 | 911.4105 | 8  | H   | 6  | 900.4574 | +0.019353 | 900.4574            |           |
|                     | 1025.453 | +0.043763 | 1025.453 | 9  | N   | 5  | 763.3985 | -0.009687 | 763.3985            |           |
|                     | 1122.506 |           | 1122.506 | 10 | P   | 4  | 649.3556 | +0.029883 | 649.3556            |           |
|                     | 1285.57  | +0.053281 | 1285.57  | 11 | Y   | 3  | 552.3028 | -0.023127 | 552.3028            |           |
|                     | 1398.654 | +0.132913 | 1398.654 | 12 | I   | 2  | 389.2395 | -0.076925 | 389.2395            |           |
| +0.005938           | 764.3517 | +0.093127 | 1527.696 | 13 | E   | 1  | 276.1554 | +0.069243 | 276.1554            |           |
|                     |          |           |          | 14 | K   | 0  | 147.1128 |           | 147.1128            |           |

Source: 20120510\_VR\_Bsu\_TripleSILACrep1\_T1L1T2\_OG\_F02  
 Scannumber: 15407  
 Protein: BSU36570; ywnG  
 Peptide Score: 56.85  
 Method: ITMS; CID; 3

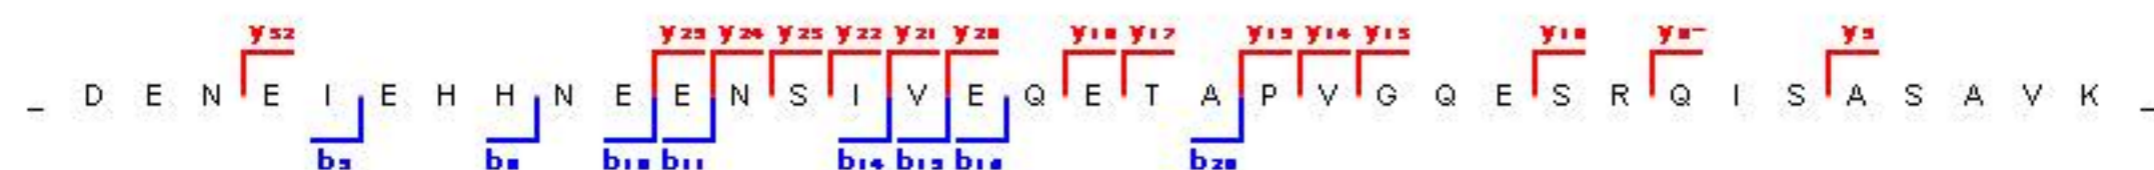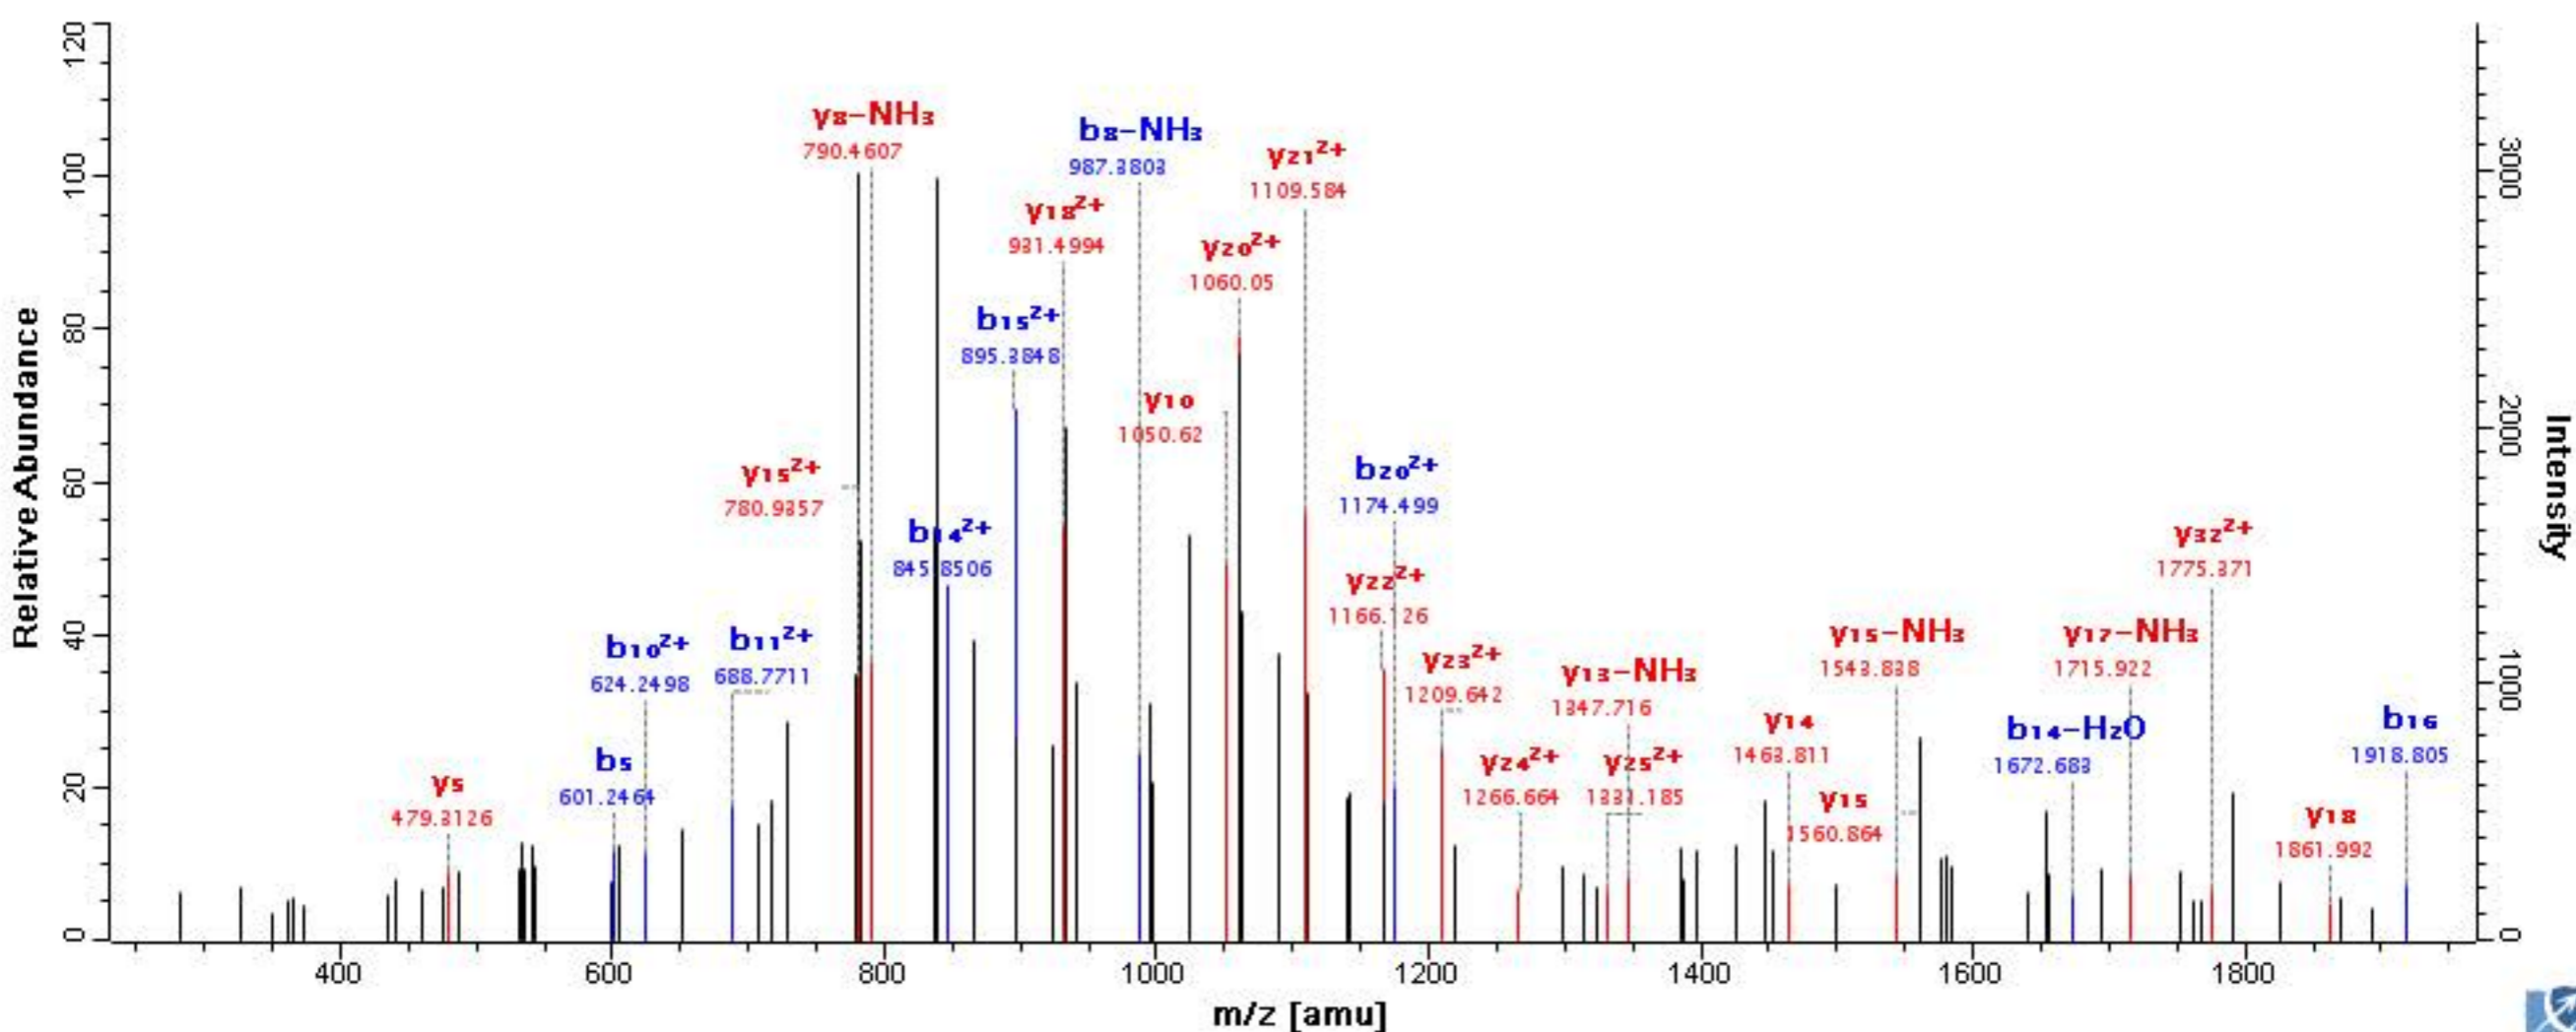

precursor information

|                   |                     |
|-------------------|---------------------|
| Mass:             | 3902.81387          |
| m/z:              | System.Collections. |
| Charge:           | System.Collections. |
| Retentiontime:    | System.Collections. |
| Score:            | 56.85416            |
| Mass Error [ppm]: | -0.40735            |
| PEP:              | 4.6257E-07          |
| Precursor Type:   | MULTI               |

| b <sup>2+</sup> ion |          | b ion     |          | seq |   |    | y ion    |           | y <sup>2+</sup> ion |           |
|---------------------|----------|-----------|----------|-----|---|----|----------|-----------|---------------------|-----------|
| Δ dalton            | mass     | Δ dalton  | mass     |     |   |    | Δ dalton | mass      | Δ dalton            | mass      |
|                     | 116.0342 |           | 116.0342 | 1   | D | 34 |          |           |                     |           |
|                     | 245.0768 |           | 245.0768 | 2   | E | 33 | 3792.821 |           | 3792.821            |           |
|                     | 359.1197 |           | 359.1197 | 3   | N | 32 | 3663.778 |           | 3663.778            |           |
|                     | 488.1623 |           | 488.1623 | 4   | E | 31 | 3549.735 |           | 1775.371            | -0.343496 |
|                     | 601.2464 | +0.202272 | 601.2464 | 5   | I | 30 | 3420.693 |           | 3420.693            |           |
|                     | 730.289  |           | 730.289  | 6   | E | 29 | 3307.609 |           | 3307.609            |           |
|                     | 867.3479 |           | 867.3479 | 7   | H | 28 | 3178.566 |           | 3178.566            |           |
|                     | 1004.407 |           | 1004.407 | 8   | H | 27 | 3041.507 |           | 3041.507            |           |
|                     | 1118.45  |           | 1118.45  | 9   | N | 26 | 2904.448 |           | 2904.448            |           |
| +0.073009           | 624.2498 |           | 1247.492 | 10  | E | 25 | 2790.405 |           | 2790.405            |           |
| +0.042314           | 688.7711 |           | 1376.535 | 11  | E | 24 | 2661.363 |           | 1331.185            | +0.158841 |
|                     | 1490.578 |           | 1490.578 | 12  | N | 23 | 2532.32  |           | 1266.664            | -0.45414  |
|                     | 1577.61  |           | 1577.61  | 13  | S | 22 | 2418.277 |           | 1209.642            | +0.375185 |
| -0.094569           | 845.8506 |           | 1690.694 | 14  | I | 21 | 2331.245 |           | 1166.126            | +0.132533 |
| +0.390511           | 895.3848 |           | 1789.762 | 15  | V | 20 | 2218.161 |           | 1109.584            | +0.159428 |
|                     | 1918.805 | -0.001854 | 1918.805 | 16  | E | 19 | 2119.093 |           | 1060.05             | +0.057771 |
|                     | 2046.864 |           | 2046.864 | 17  | Q | 18 | 1990.05  |           | 1990.05             |           |
|                     | 2175.906 |           | 2175.906 | 18  | E | 17 | 1861.992 | -0.244273 | 931.4994            | +0.036945 |
|                     | 2276.954 |           | 2276.954 | 19  | T | 16 | 1732.949 |           | 1732.949            |           |
| +0.172656           | 1174.499 |           | 2347.991 | 20  | A | 15 | 1631.901 |           | 1631.901            |           |
|                     | 2445.044 |           | 2445.044 | 21  | P | 14 | 1560.864 | -0.161077 | 780.9357            | +0.286612 |
|                     | 2544.112 |           | 2544.112 | 22  | V | 13 | 1463.811 | -0.060096 | 1463.811            |           |
|                     | 2601.134 |           | 2601.134 | 23  | G | 12 | 1364.743 |           | 1364.743            |           |
|                     | 2729.192 |           | 2729.192 | 24  | Q | 11 | 1307.722 |           | 1307.722            |           |
|                     | 2858.235 |           | 2858.235 | 25  | E | 10 | 1179.663 |           | 1179.663            |           |
|                     | 2945.267 |           | 2945.267 | 26  | S | 9  | 1050.62  | -0.155669 | 1050.62             |           |
|                     | 3101.368 |           | 3101.368 | 27  | R | 8  | 963.5884 |           | 963.5884            |           |
|                     | 3229.426 |           | 3229.426 | 28  | Q | 7  | 807.4873 |           | 807.4873            |           |
|                     | 3342.511 |           | 3342.511 | 29  | I | 6  | 679.4287 |           | 679.4287            |           |
|                     | 3429.543 |           | 3429.543 | 30  | S | 5  | 566.3446 |           | 566.3446            |           |
|                     | 3500.58  |           | 3500.58  | 31  | A | 4  | 479.3126 | +0.132121 | 479.3126            |           |
|                     | 3587.612 |           | 3587.612 | 32  | S | 3  | 408.2755 |           | 408.2755            |           |
|                     | 3658.649 |           | 3658.649 | 33  | A | 2  | 321.2434 |           | 321.2434            |           |
|                     | 3757.717 |           | 3757.717 | 34  | V | 1  | 250.2063 |           | 250.2063            |           |
|                     |          |           |          | 35  | K | 0  | 151.1379 |           | 151.1379            |           |

general information

|                       |          |
|-----------------------|----------|
| Annotation:           | 19 of 35 |
| AminoAcids Coverag    | 54 %     |
| Intensity Coverage:   | 32 %     |
| Protein Localisation: | 7 ... 41 |

Source: 20120510\_VR\_Bsu\_TripleSILACrep1\_T1L1T2\_OG\_F02  
 Scannumber: 21008  
 Protein: BSU24890; yqqN  
 Peptide Score: 98.16  
 Method: ITMS; CID; 3

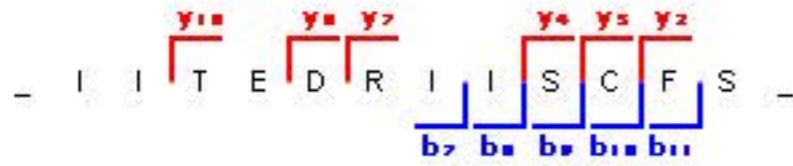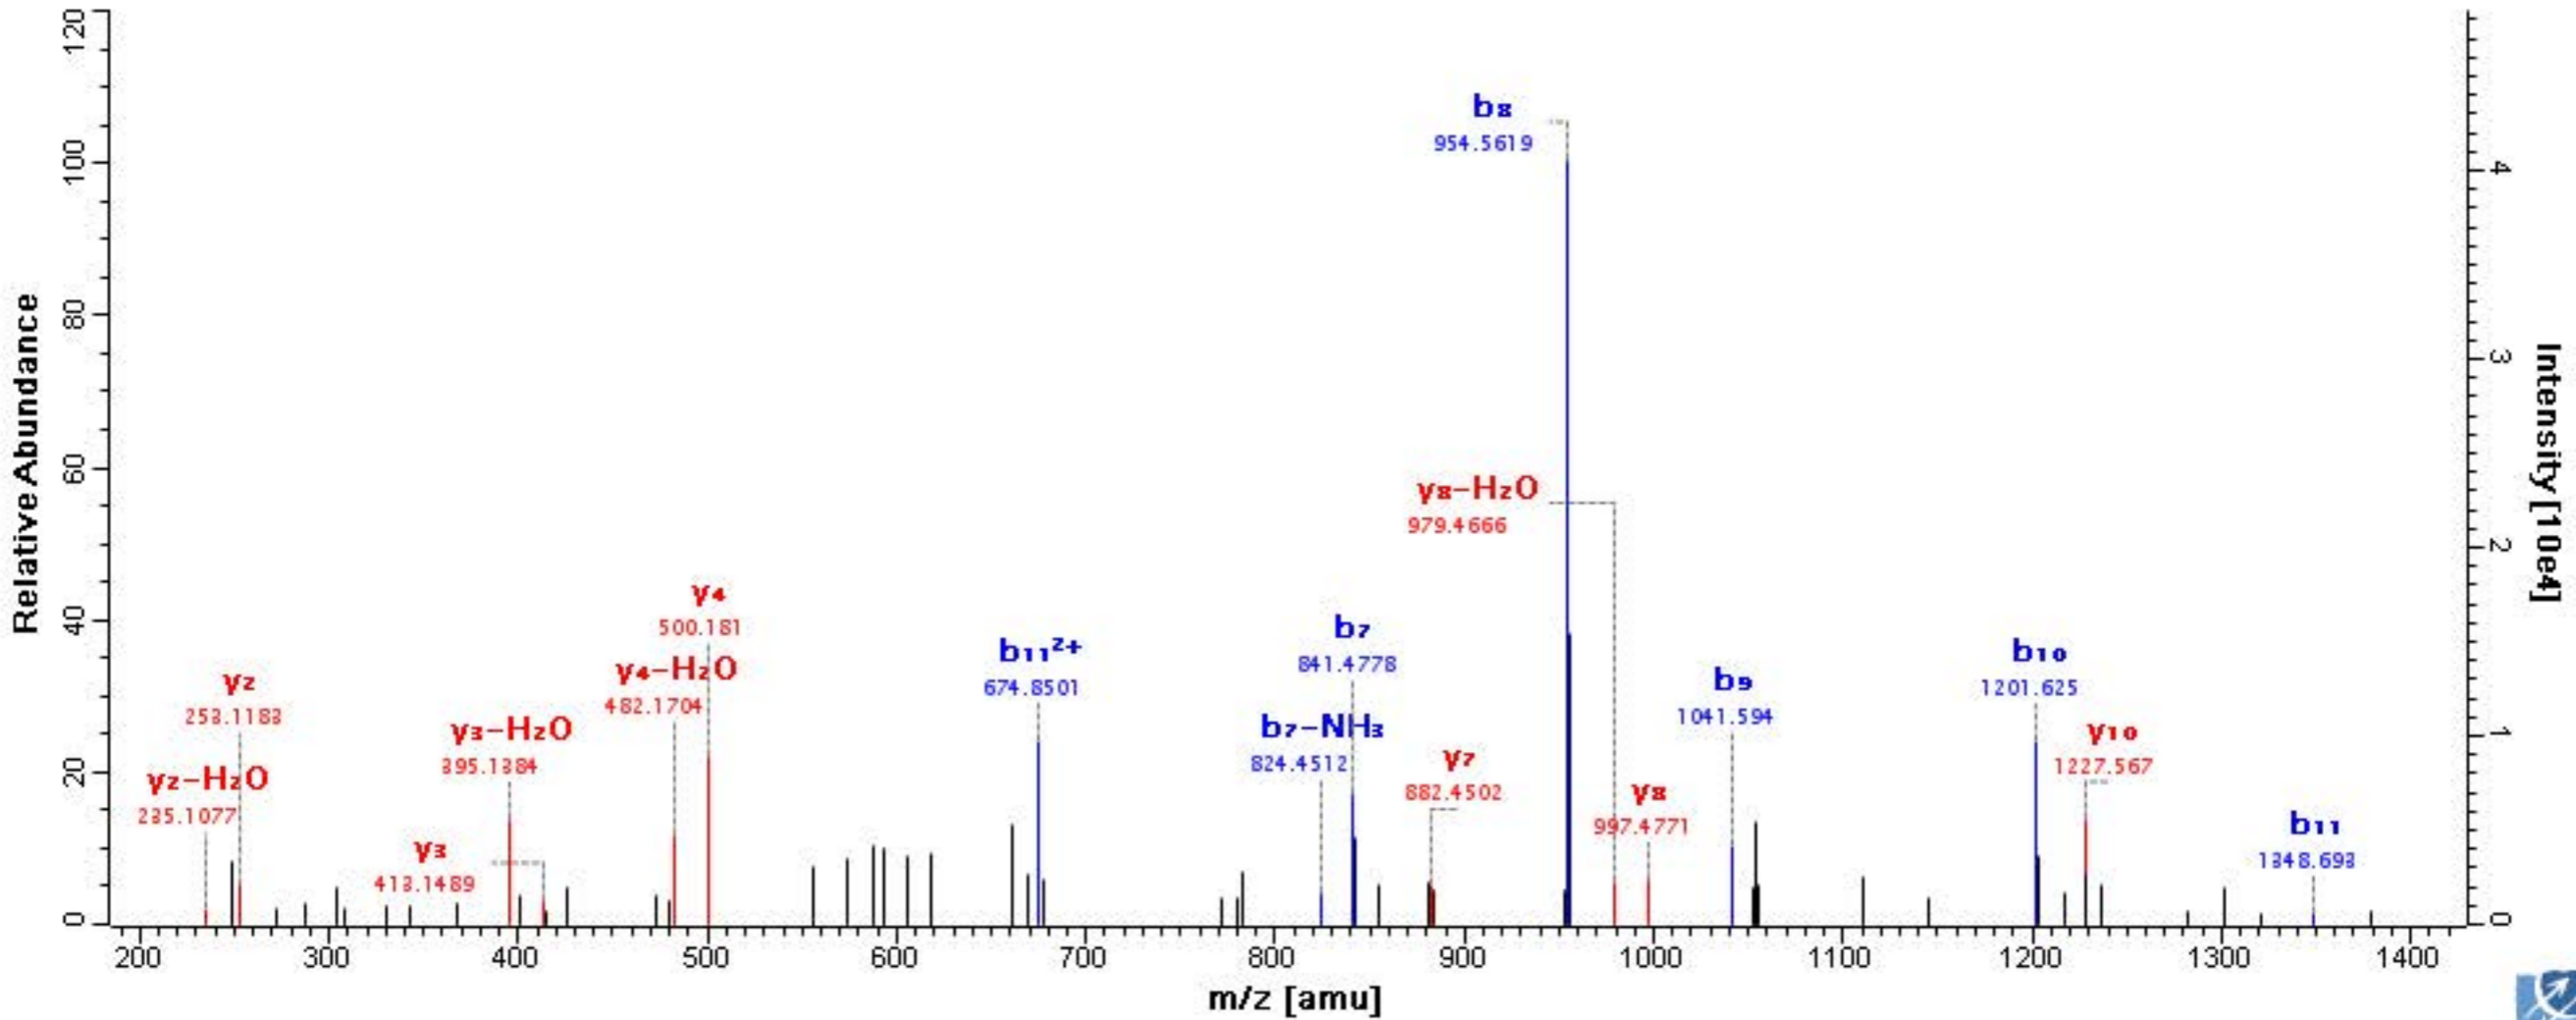

#### precursor information

|                   |                     |
|-------------------|---------------------|
| Mass:             | 1452.72788          |
| m/z:              | System.Collections. |
| Charge:           | System.Collections. |
| Retentiontime:    | System.Collections. |
| Score:            | 98.15634            |
| Mass Error [ppm]: | -0.26373            |
| PEP:              | 0.0019519           |
| Precursor Type:   | ISO                 |

#### general information

|                       |             |
|-----------------------|-------------|
| Annotation:           | 8 of 12     |
| AminoAcids Coverag    | 67 %        |
| Intensity Coverage:   | 48 %        |
| Protein Localisation: | 176 ... 187 |

| b <sup>2+</sup> ion |              | b ion      |              |     | y ion |          |                         |
|---------------------|--------------|------------|--------------|-----|-------|----------|-------------------------|
| Δ dalton            | mass         | Δ dalton   | mass         | seq |       | Δ dalton | mass                    |
|                     | 114.09134045 |            | 114.09134045 | 1   | I     | 11       |                         |
|                     | 227.17540443 |            | 227.17540443 | 2   | I     | 10       | 1340.6514777            |
|                     | 328.2230829  |            | 328.2230829  | 3   | T     | 9        | 1227.5674137 +0.1060482 |
|                     | 457.265676   |            | 457.265676   | 4   | E     | 8        | 1126.5197352            |
|                     | 572.29261903 |            | 572.29261903 | 5   | D     | 7        | 997.47714211 +0.2605288 |
|                     | 728.39373006 |            | 728.39373006 | 6   | R     | 6        | 882.45019908 +0.1112633 |
|                     | 841.47779404 | -0.0102647 | 841.47779404 | 7   | I     | 5        | 726.34908805            |
|                     | 954.56185802 | +0.0243236 | 954.56185802 | 8   | I     | 4        | 613.26502407            |
|                     | 1041.5938864 | +0.1542825 | 1041.5938864 | 9   | S     | 3        | 500.18096009 -0.0439972 |
|                     | 1201.6245346 | +0.1846695 | 1201.6245346 | 10  | C     | 2        | 413.14893168 +0.2542666 |
| +0.4602513          | 674.85011251 | +0.2621296 | 1348.6929485 | 11  | F     | 1        | 253.11828348 -0.0486576 |
|                     |              |            |              | 12  | S     | 0        | 106.04986956            |

Source: 20120510\_VR\_Bsu\_TripleSILACrep1\_T1L1T2\_OG\_F02  
 Scannumber: 22311  
 Protein: BSU01730; sigW; ybbL  
 Peptide Score: 115.12  
 Method: ITMS; CID; 3

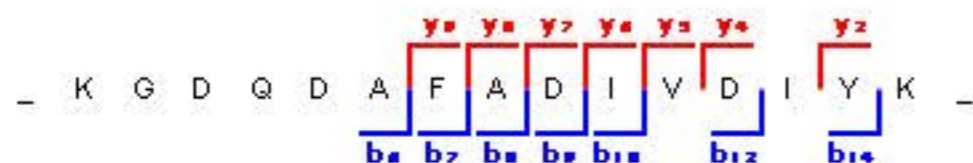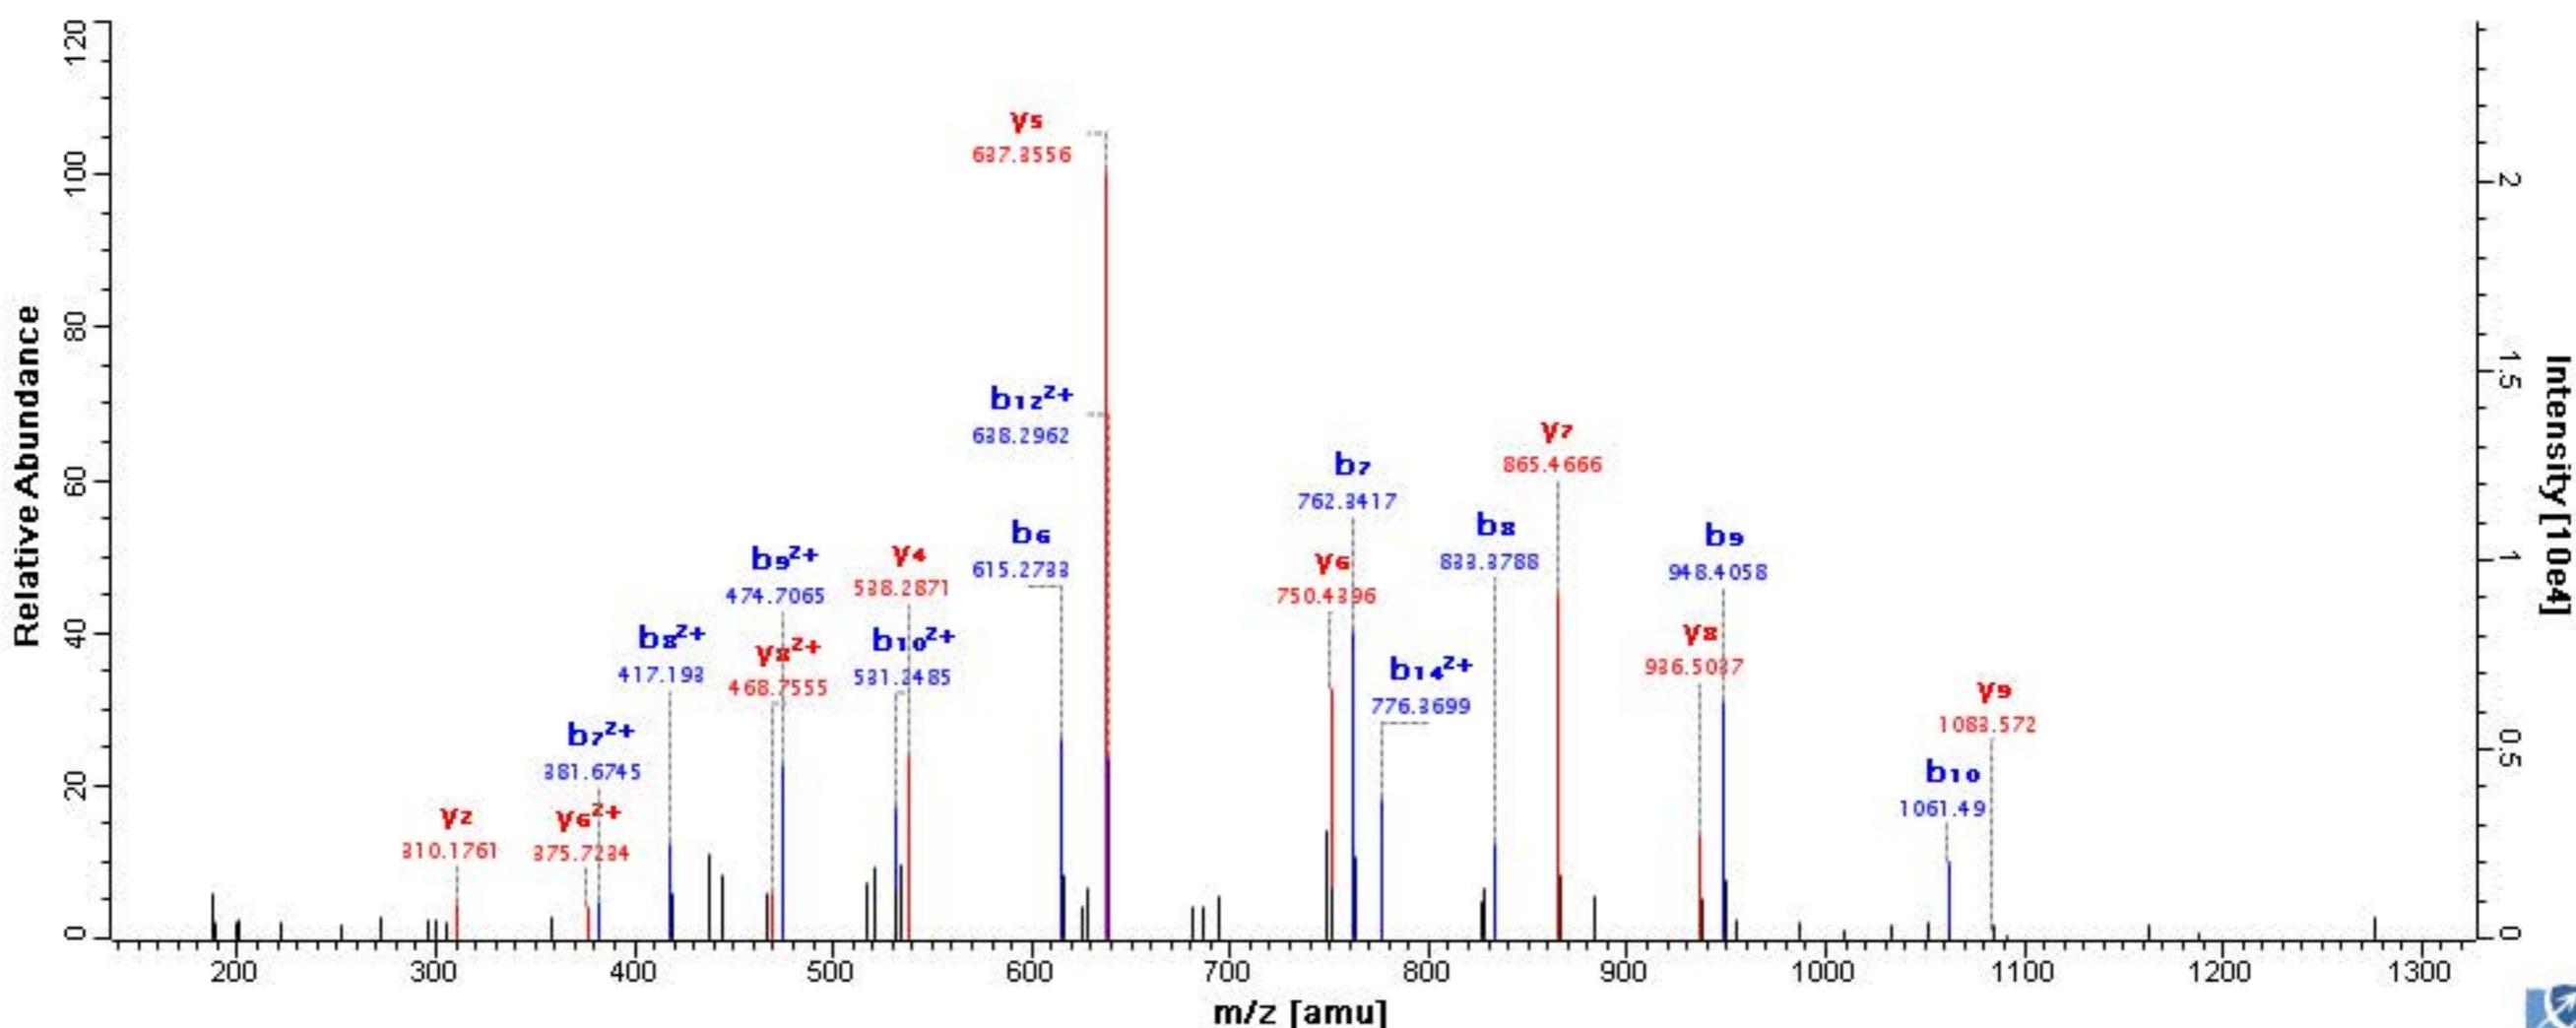

#### precursor information

|                   |                     |
|-------------------|---------------------|
| Mass:             | 1696.83023          |
| m/z:              | System.Collections. |
| Charge:           | System.Collections. |
| Retentiontime:    | System.Collections. |
| Score:            | 115.1193            |
| Mass Error [ppm]: | -0.34805            |
| PEP:              | 1.4376E-05          |
| Precursor Type:   | MULTI               |

| b <sup>2+</sup> ion |          | b ion     |          |     | y ion |          | y <sup>2+</sup> ion |           |          |
|---------------------|----------|-----------|----------|-----|-------|----------|---------------------|-----------|----------|
| Δ dalton            | mass     | Δ dalton  | mass     | seq |       | Δ dalton | mass                | Δ dalton  | mass     |
|                     | 129.1022 |           | 129.1022 | 1   | K     | 14       |                     |           |          |
|                     | 186.1237 |           | 186.1237 | 2   | G     | 13       | 1569.743            |           | 1569.743 |
|                     | 301.1506 |           | 301.1506 | 3   | D     | 12       | 1512.722            |           | 1512.722 |
|                     | 429.2092 |           | 429.2092 | 4   | Q     | 11       | 1397.695            |           | 1397.695 |
|                     | 544.2362 |           | 544.2362 | 5   | D     | 10       | 1269.636            |           | 1269.636 |
|                     | 615.2733 | +0.080784 | 615.2733 | 6   | A     | 9        | 1154.609            |           | 1154.609 |
| +0.272109           | 381.6745 | +0.078899 | 762.3417 | 7   | F     | 8        | 1083.572            | +0.482721 | 1083.572 |
| +0.138989           | 417.193  | +0.119666 | 833.3788 | 8   | A     | 7        | 936.5037            | +0.047534 | 468.7555 |
| +0.030547           | 474.7065 | +0.20045  | 948.4058 | 9   | D     | 6        | 865.4666            | -0.019112 | 865.4666 |
| +0.097218           | 531.2485 | +0.121879 | 1061.49  | 10  | I     | 5        | 750.4396            | +0.274677 | 375.7234 |
|                     | 1160.558 |           | 1160.558 | 11  | V     | 4        | 637.3556            | +0.044044 | 637.3556 |
| +0.052225           | 638.2962 |           | 1275.585 | 12  | D     | 3        | 538.2871            | +0.065888 | 538.2871 |
|                     | 1388.669 |           | 1388.669 | 13  | I     | 2        | 423.2602            |           | 423.2602 |
| +0.232802           | 776.3699 |           | 1551.733 | 14  | Y     | 1        | 310.1761            | +0.027175 | 310.1761 |
|                     |          |           |          | 15  | K     | 0        | 147.1128            |           | 147.1128 |

#### general information

|                       |           |
|-----------------------|-----------|
| Annotation:           | 8 of 15   |
| AminoAcids Coverag    | 53 %      |
| Intensity Coverage:   | 68 %      |
| Protein Localisation: | 14 ... 28 |

Source: 20120510\_VR\_Bsu\_TripleSILACrep1\_T1L1T2\_OG\_F03  
 Scannumber: 12280  
 Protein: BSU14910; ctaE  
 Peptide Score: 185.77  
 Method: ITMS; CID; 3

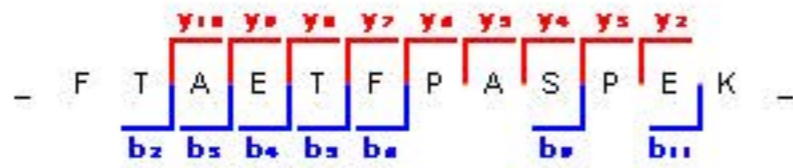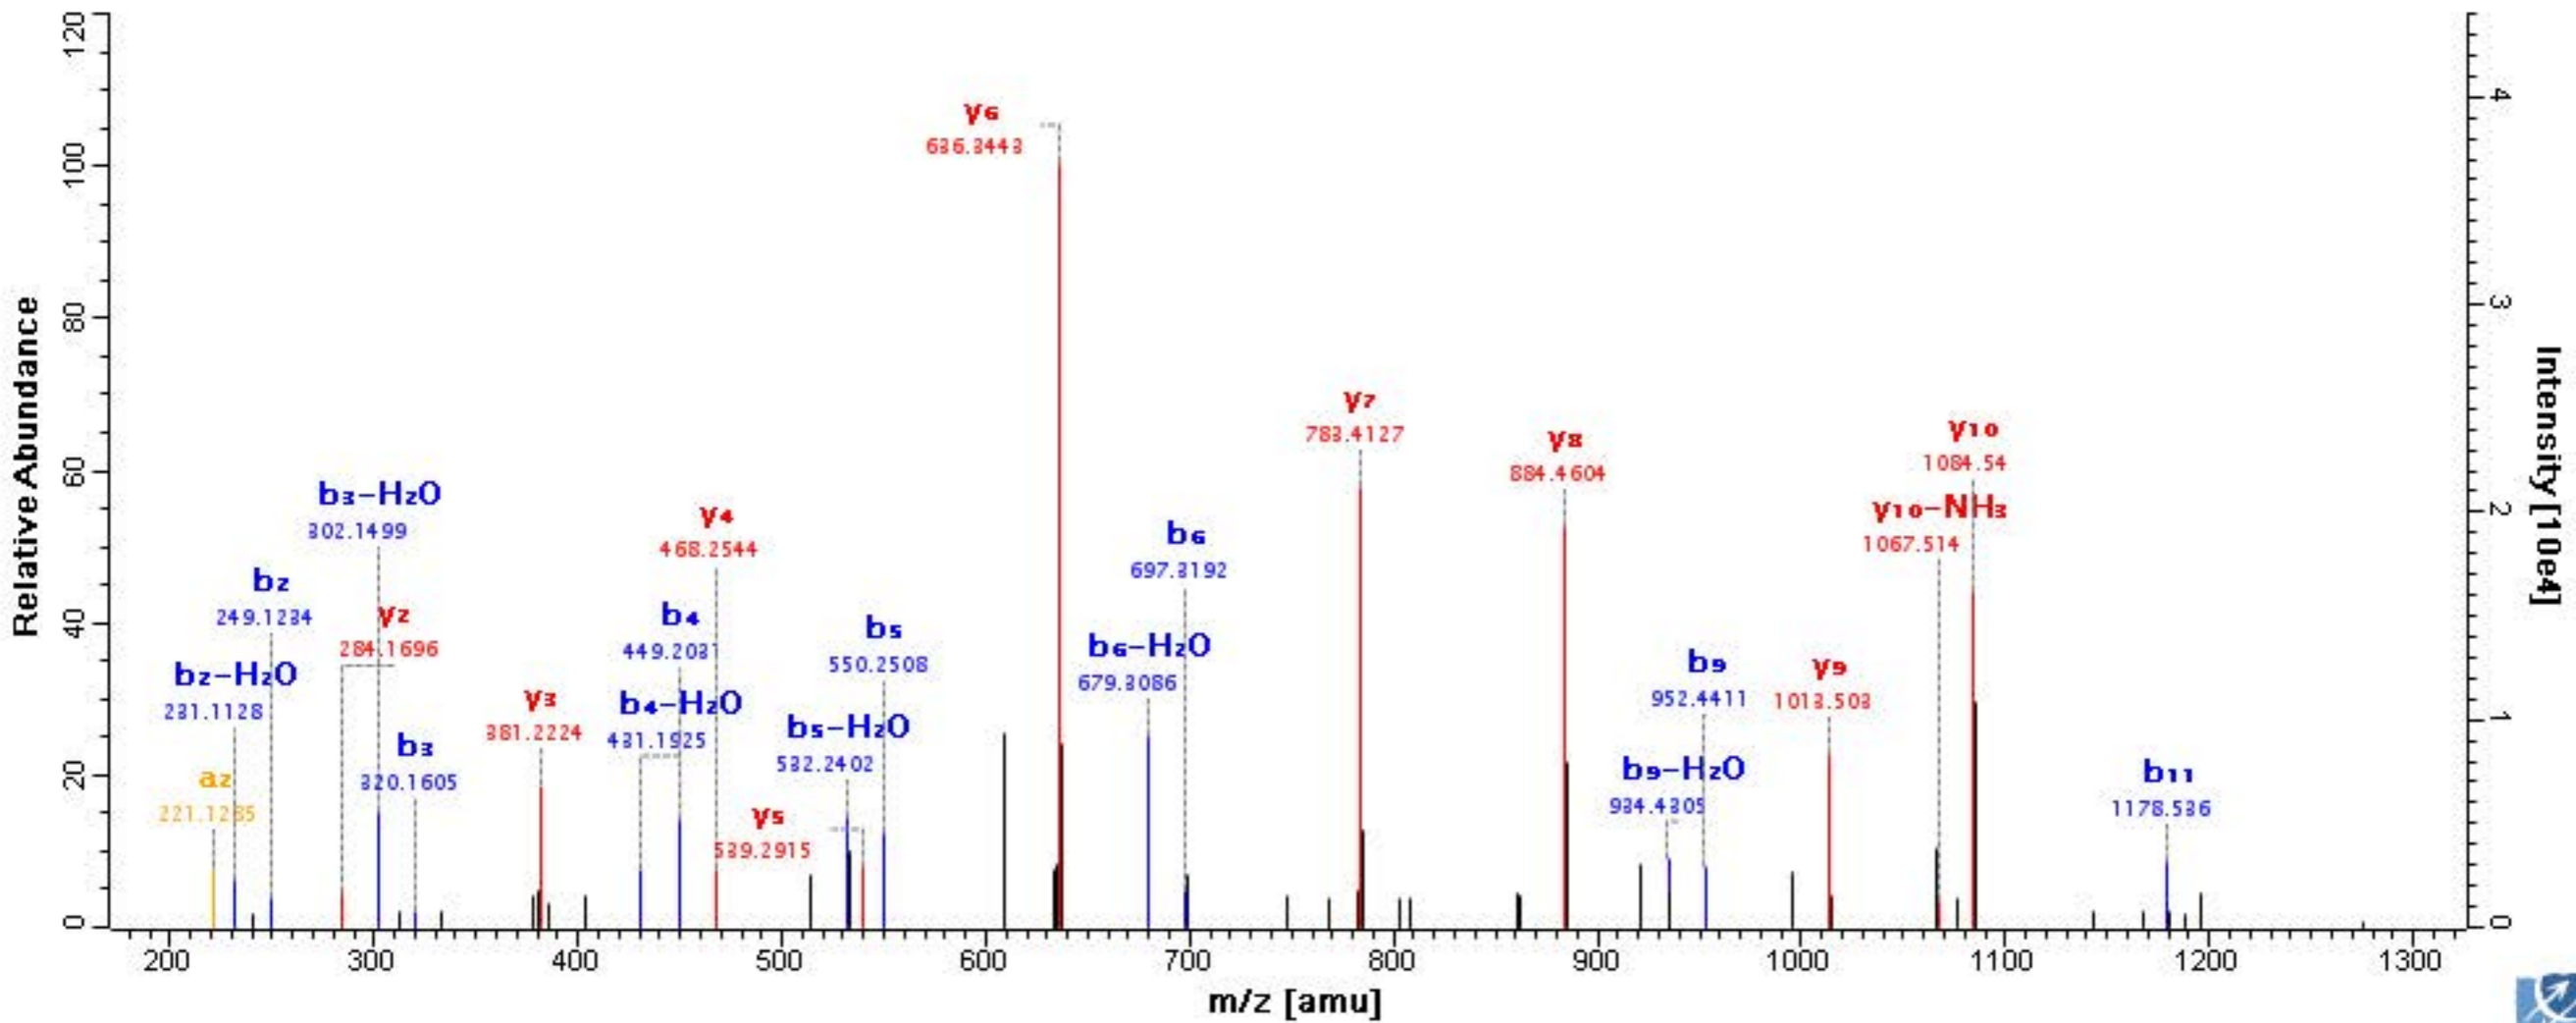

**precursor information**

|                   |                     |
|-------------------|---------------------|
| Mass:             | 1331.64749          |
| m/z:              | System.Collections. |
| Charge:           | System.Collections. |
| Retentiontime:    | System.Collections. |
| Score:            | 185.7693            |
| Mass Error [ppm]: | -1.0425             |
| PEP:              | 3.5443E-21          |
| Precursor Type:   | ISO                 |

**general information**

|                       |          |
|-----------------------|----------|
| Annotation:           | 10 of 12 |
| AminoAcids Coverag    | 83 %     |
| Intensity Coverage:   | 64 %     |
| Protein Localisation: | 7 ... 18 |

| a ion           |              | b ion           |              |     | y ion |                 |              |
|-----------------|--------------|-----------------|--------------|-----|-------|-----------------|--------------|
| $\Delta$ dalton | mass         | $\Delta$ dalton | mass         | seq |       | $\Delta$ dalton | mass         |
|                 | 120.08077576 |                 | 148.07569038 | 1   | F     | 11              |              |
| +0.0482731      | 221.12845423 | +0.094191       | 249.12336886 | 2   | T     | 10              | 1185.5877437 |
|                 | 292.16556802 | +0.123697       | 320.16048264 | 3   | A     | 9               | 1084.5400653 |
|                 | 421.20816112 | +0.1857182      | 449.20307574 | 4   | E     | 8               | 1013.5029515 |
|                 | 522.25583959 | +0.0323879      | 550.25075422 | 5   | T     | 7               | 884.46035837 |
|                 | 669.32425351 | +0.0368499      | 697.31916813 | 6   | F     | 6               | 783.4126799  |
|                 | 766.37701736 |                 | 794.37193198 | 7   | P     | 5               | 636.34426598 |
|                 | 837.41413115 |                 | 865.40904577 | 8   | A     | 4               | 539.29150213 |
|                 | 924.44615956 | +0.2040674      | 952.44107418 | 9   | S     | 3               | 468.25438834 |
|                 | 1021.4989234 |                 | 1049.493838  | 10  | P     | 2               | 381.22235993 |
|                 | 1150.5415165 | +0.2283394      | 1178.5364311 | 11  | E     | 1               | 284.16959608 |
|                 |              |                 |              | 12  | K     | 0               | 155.12700298 |

Source: 20120510\_VR\_Bsu\_TripleSILACrep1\_T1L1T2\_OG\_F03  
 Scannumber: 13106  
 Protein: BSU01510; ybaJ  
 Peptide Score: 106.49  
 Method: ITMS; CID; 3

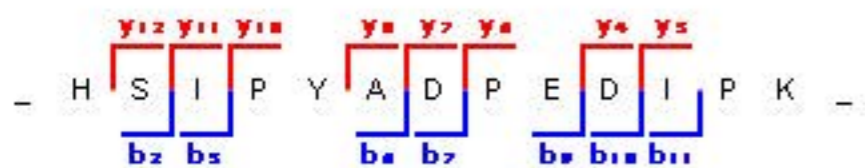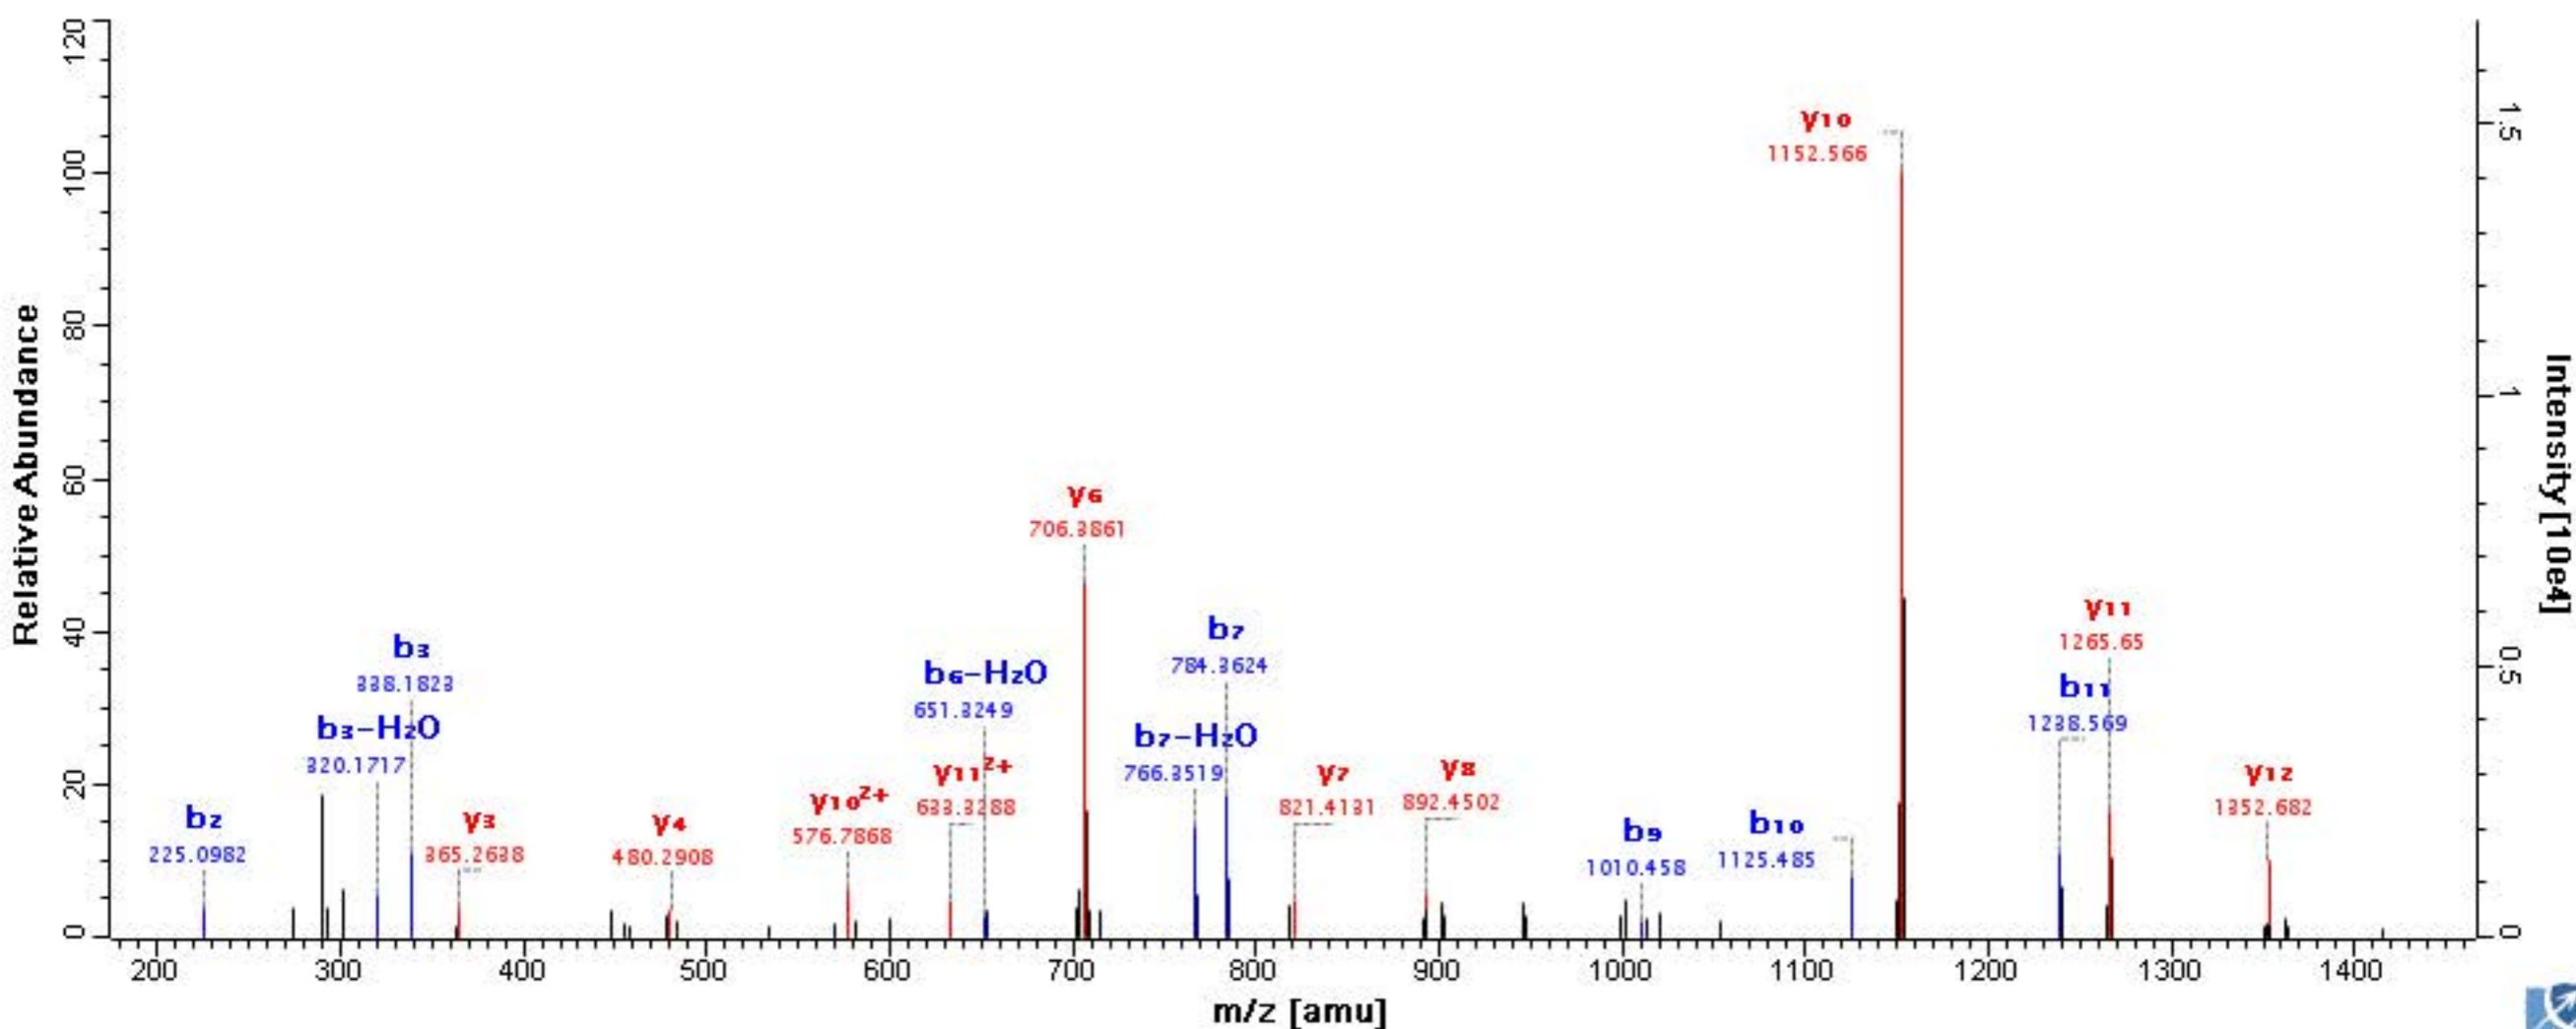

#### precursor information

|                   |                     |
|-------------------|---------------------|
| Mass:             | 1480.72003          |
| m/z:              | System.Collections. |
| Charge:           | System.Collections. |
| Retentiontime:    | System.Collections. |
| Score:            | 106.492             |
| Mass Error [ppm]: | 0.15079             |
| PEP:              | 0.0011513           |
| Precursor Type:   | MULTI               |

#### general information

|                       |             |
|-----------------------|-------------|
| Annotation:           | 9 of 13     |
| AminoAcids Coverag    | 69 %        |
| Intensity Coverage:   | 52 %        |
| Protein Localisation: | 183 ... 195 |

| b ion      |              |    |     |    | y ion        |            | y <sup>2+</sup> ion |            |
|------------|--------------|----|-----|----|--------------|------------|---------------------|------------|
| Δ dalton   | mass         |    | seq |    | Δ dalton     | mass       | Δ dalton            | mass       |
|            | 138.06618833 | 1  | H   | 12 |              |            |                     |            |
| +0.1496318 | 225.09821674 | 2  | S   | 11 | 1352.6823724 | +0.2260749 | 1352.6823724        |            |
| -0.0212395 | 338.18228072 | 3  | I   | 10 | 1265.650344  | -0.0015403 | 633.32881023        | -0.1457048 |
|            | 435.23504457 | 4  | P   | 9  | 1152.56628   | +0.0070843 | 576.78677824        | -0.0469711 |
|            | 598.29837311 | 5  | Y   | 8  | 1055.5135162 |            | 1055.5135162        |            |
|            | 669.3354869  | 6  | A   | 7  | 892.45018762 | +0.0263749 | 892.45018762        |            |
| +0.0535857 | 784.36242993 | 7  | D   | 6  | 821.41307383 | +0.2686278 | 821.41307383        |            |
|            | 881.41519378 | 8  | P   | 5  | 706.3861308  | -0.0314555 | 706.3861308         |            |
| +0.2080456 | 1010.4577869 | 9  | E   | 4  | 609.33336694 |            | 609.33336694        |            |
| +0.0308951 | 1125.4847299 | 10 | D   | 3  | 480.29077385 | -0.1460595 | 480.29077385        |            |
| +0.021294  | 1238.5687939 | 11 | I   | 2  | 365.26383082 | +0.106439  | 365.26383082        |            |
|            | 1335.6215577 | 12 | P   | 1  | 252.17976684 |            | 252.17976684        |            |
|            |              | 13 | K   | 0  | 155.12700298 |            | 155.12700298        |            |

Source: 20120510\_VR\_Bsu\_TripleSILACrep1\_T1L1T2\_OG\_F04  
 Scannumber: 16594  
 Protein: BSU17610; xylB; yncA  
 Peptide Score: 105.4  
 Method: ITMS; CID; 3

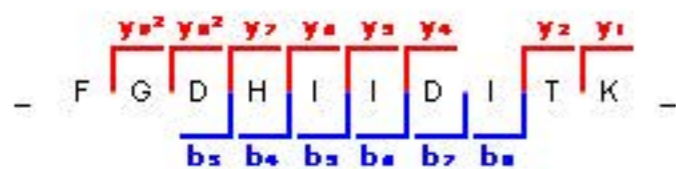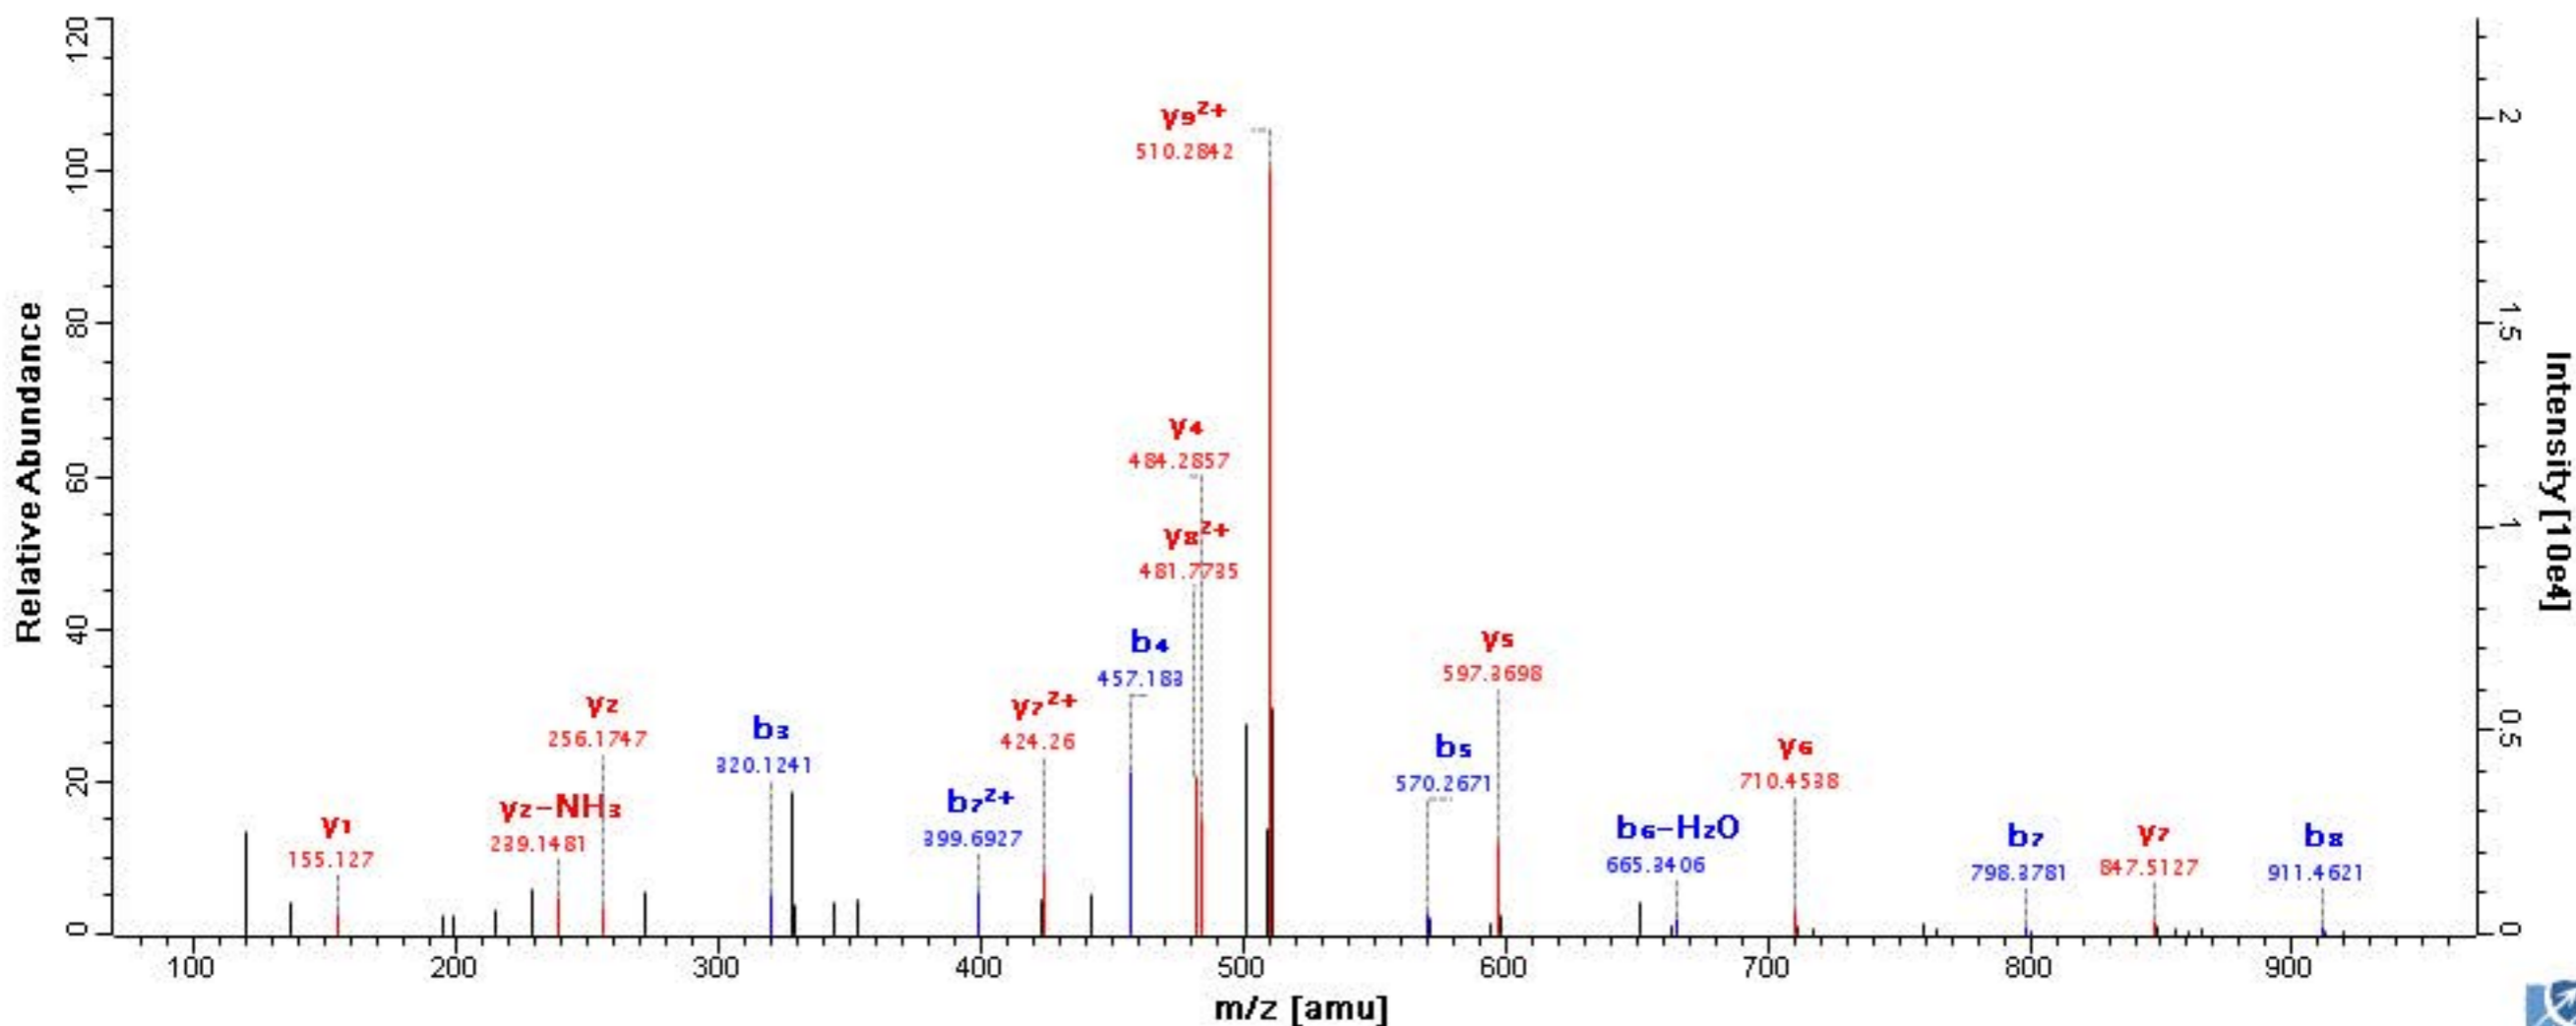

#### precursor information

|                   |                     |
|-------------------|---------------------|
| Mass:             | 0                   |
| m/z:              | System.Collections. |
| Charge:           | System.Collections. |
| Retentiontime:    | System.Collections. |
| Score:            | 105.3963            |
| Mass Error [ppm]: | -0.45675            |
| PEP:              | 0.00017912          |
| Precursor Type:   | PEAK                |

#### general information

|                       |             |
|-----------------------|-------------|
| Annotation:           | 9 of 10     |
| AminoAcids Coverage:  | 90 %        |
| Intensity Coverage:   | 56 %        |
| Protein Localisation: | 116 ... 125 |

| b <sup>2+</sup> ion |          | b ion     |          |     | γ ion |          | γ <sup>2+</sup> ion |           |          |
|---------------------|----------|-----------|----------|-----|-------|----------|---------------------|-----------|----------|
| Δ dalton            | mass     | Δ dalton  | mass     | seq |       | Δ dalton | mass                | Δ dalton  | mass     |
|                     | 148.0757 |           | 148.0757 | 1   | F     | 9        |                     |           |          |
|                     | 205.0972 |           | 205.0972 | 2   | G     | 8        | 1019.561            |           | 510.2842 |
|                     | 320.1241 | +0.041674 | 320.1241 | 3   | D     | 7        | 962.5397            |           | 481.7735 |
|                     | 457.183  | -0.064601 | 457.183  | 4   | H     | 6        | 847.5127            | +0.250883 | 424.26   |
|                     | 570.2671 | -0.022078 | 570.2671 | 5   | I     | 5        | 710.4538            | +0.130473 | 710.4538 |
|                     | 683.3511 |           | 683.3511 | 6   | I     | 4        | 597.3698            | +0.084715 | 597.3698 |
| -0.05657            | 399.6927 | +0.375277 | 798.3781 | 7   | D     | 3        | 484.2857            | +0.03084  | 484.2857 |
|                     | 911.4621 | +0.095839 | 911.4621 | 8   | I     | 2        | 369.2587            |           | 369.2587 |
|                     | 1012.51  |           | 1012.51  | 9   | T     | 1        | 256.1747            | +0.0011   | 256.1747 |
|                     |          |           |          | 10  | K     | 0        | 155.127             | +0.173702 | 155.127  |



Source: 20120510\_VR\_Bsu\_TripleSILACrep1\_T1L1T2\_OG\_F04  
 Scannumber: 17509  
 Protein: BSU04060; ycsG; ycsH  
 Peptide Score: 113.25  
 Method: ITMS; CID; 3

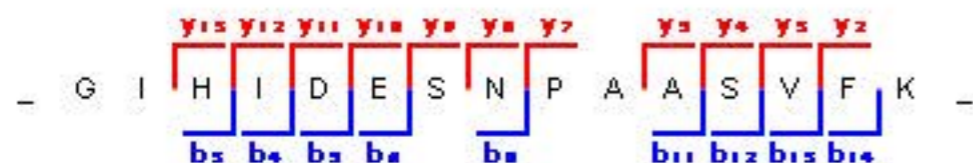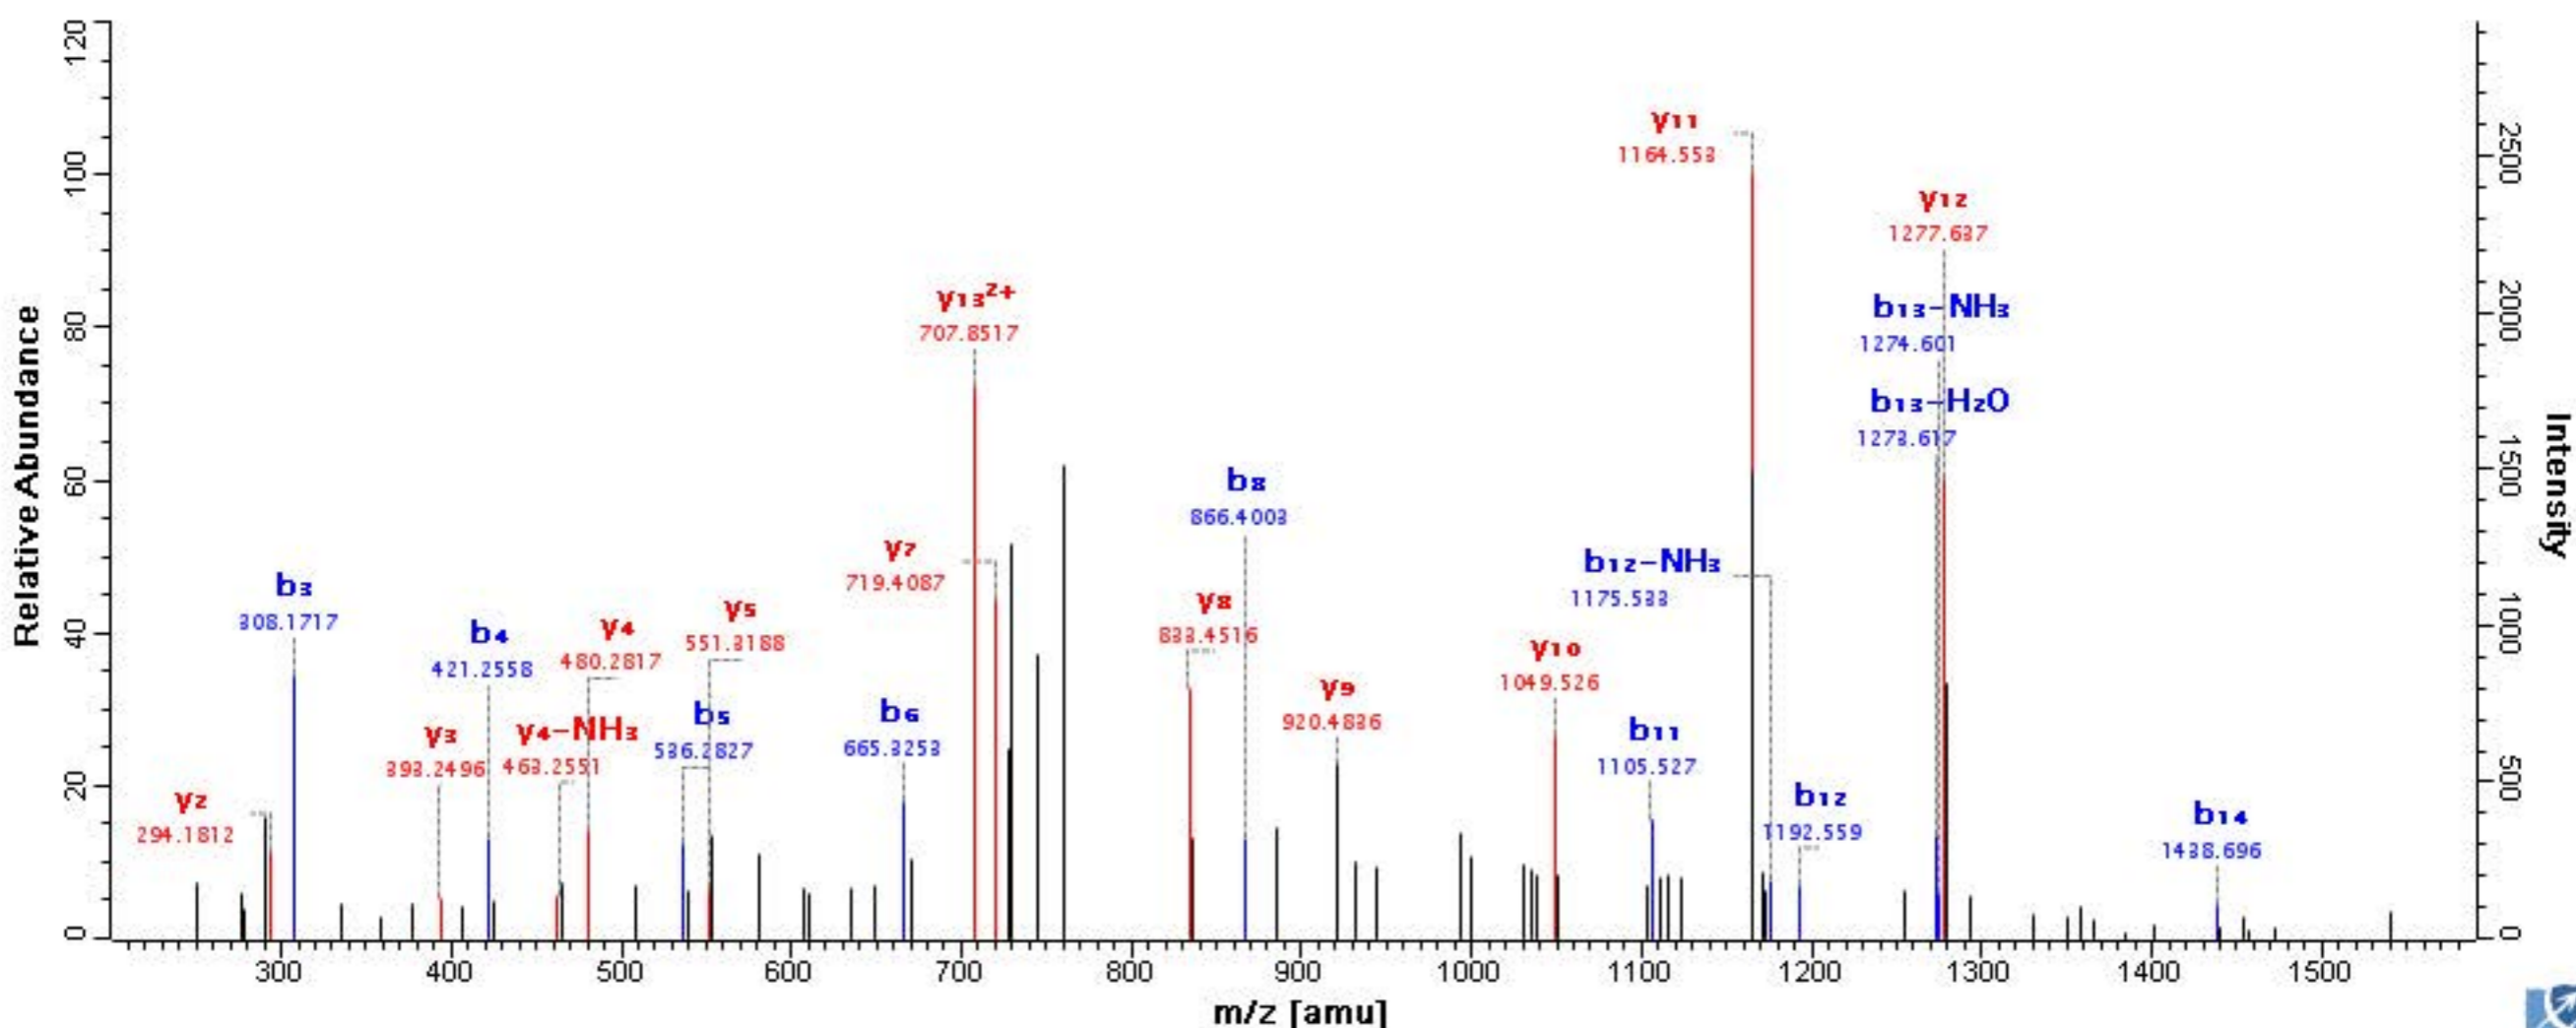

#### precursor information

|                   |                     |
|-------------------|---------------------|
| Mass:             | 1583.79476          |
| m/z:              | System.Collections. |
| Charge:           | System.Collections. |
| Retentiontime:    | System.Collections. |
| Score:            | 113.2528            |
| Mass Error [ppm]: | 0.24395             |
| PEP:              | 3.7413E-07          |
| Precursor Type:   | ISO                 |

| b ion           |              |    |     |    | $\gamma$ ion    |            | $\gamma^{2+}$ ion |            |
|-----------------|--------------|----|-----|----|-----------------|------------|-------------------|------------|
| $\Delta$ dalton | mass         |    | seq |    | $\Delta$ dalton | mass       | $\Delta$ dalton   | mass       |
|                 | 58.02874019  | 1  | G   | 14 |                 |            |                   |            |
|                 | 171.11280417 | 2  | I   | 13 | 1527.7801836    |            | 1527.7801836      |            |
| +0.1403567      | 308.17171603 | 3  | H   | 12 | 1414.6961197    |            | 707.85169807      | +0.2475451 |
| +0.1324646      | 421.25578001 | 4  | I   | 11 | 1277.6372078    | +0.1051018 | 1277.6372078      |            |
| +0.0113443      | 536.28272305 | 5  | D   | 10 | 1164.5531438    | +0.095782  | 1164.5531438      |            |
| -0.0098865      | 665.32531614 | 6  | E   | 9  | 1049.5262008    | +0.129683  | 1049.5262008      |            |
|                 | 752.35734455 | 7  | S   | 8  | 920.4836077     | -0.0022234 | 920.4836077       |            |
| +0.0463833      | 866.400272   | 8  | N   | 7  | 833.45157929    | +0.2279251 | 833.45157929      |            |
|                 | 963.45303585 | 9  | P   | 6  | 719.40865184    | +0.0312285 | 719.40865184      |            |
|                 | 1034.4901496 | 10 | A   | 5  | 622.35588799    |            | 622.35588799      |            |
| +0.3296702      | 1105.5272634 | 11 | A   | 4  | 551.3187742     | -0.2374143 | 551.3187742       |            |
| +0.2230568      | 1192.5592918 | 12 | S   | 3  | 480.28166041    | +0.25197   | 480.28166041      |            |
|                 | 1291.6277058 | 13 | V   | 2  | 393.249632      | +0.1968707 | 393.249632        |            |
| +0.2416245      | 1438.6961197 | 14 | F   | 1  | 294.18121809    | +0.1250258 | 294.18121809      |            |
|                 |              | 15 | K   | 0  | 147.11280417    |            | 147.11280417      |            |

#### general information

|                       |             |
|-----------------------|-------------|
| Annotation:           | 11 of 15    |
| AminoAcids Coverag    | 73 %        |
| Intensity Coverage:   | 47 %        |
| Protein Localisation: | 255 ... 269 |

Source: 20120510\_VR\_Bsu\_TripleSILACrep1\_T1L1T2\_OG\_F04  
 Scannumber: 22605  
 Protein: B65C; BSU39670; fbaB; ioU; yxdI  
 Peptide Score: 71.28  
 Method: ITMS; CID; 3

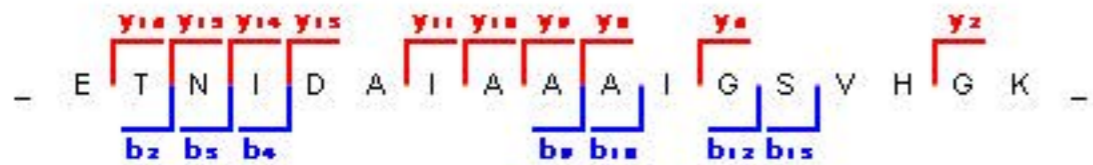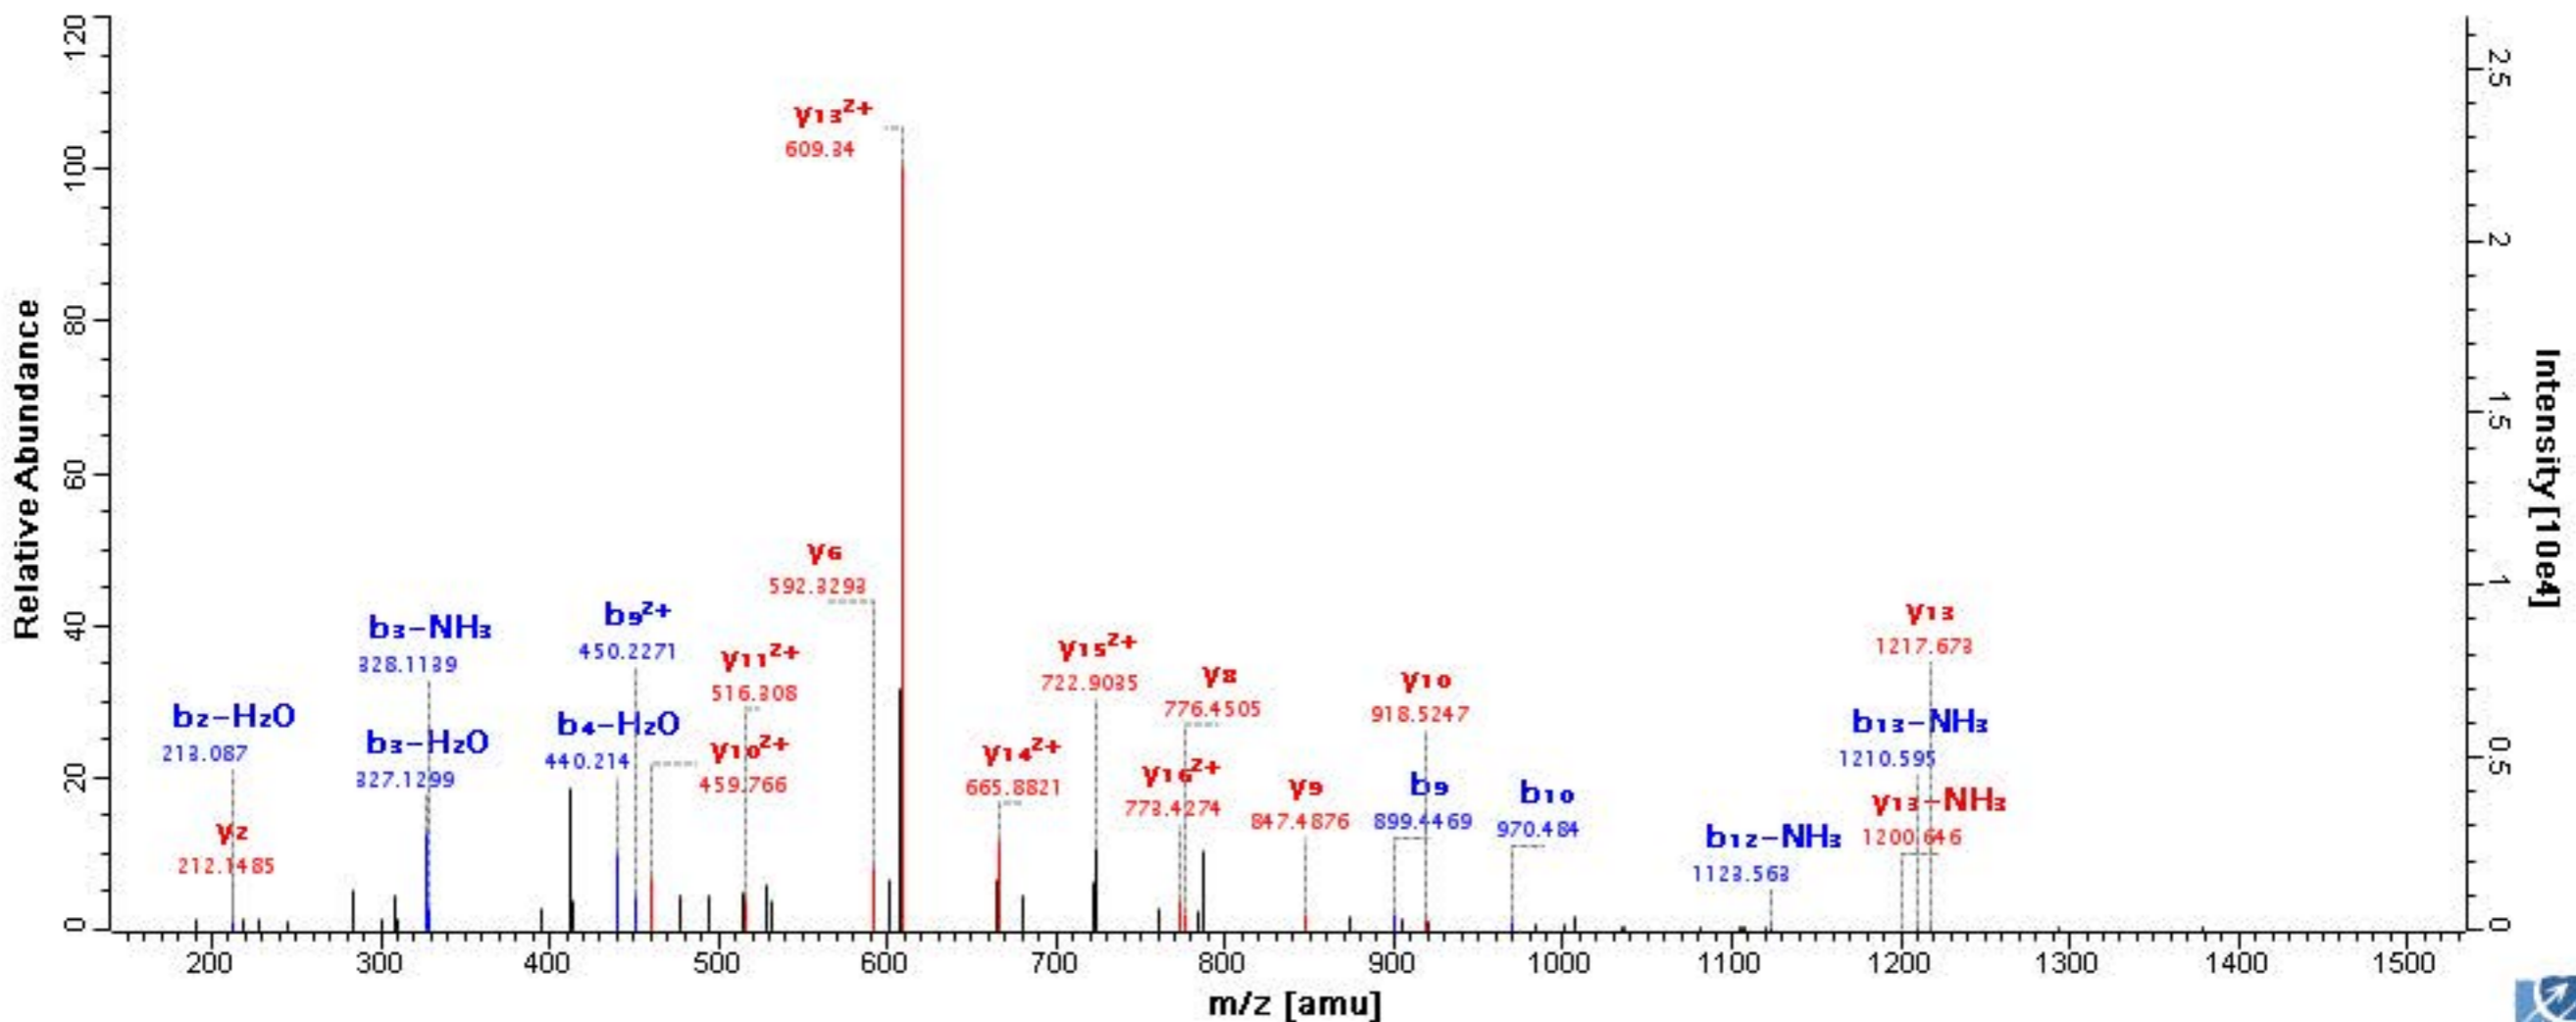

#### precursor information

|                   |                     |
|-------------------|---------------------|
| Mass:             | 1665.86815          |
| m/z:              | System.Collections. |
| Charge:           | System.Collections. |
| Retentiontime:    | System.Collections. |
| Score:            | 71.27939            |
| Mass Error [ppm]: | -0.26707            |
| PEP:              | 0.00010668          |
| Precursor Type:   | MULTI               |

| b <sup>2+</sup> ion |          | b ion     |          | seq |   |    | y ion    |           | y <sup>2+</sup> ion |           |
|---------------------|----------|-----------|----------|-----|---|----|----------|-----------|---------------------|-----------|
| Δ dalton            | mass     | Δ dalton  | mass     |     |   |    | Δ dalton | mass      | Δ dalton            | mass      |
|                     | 130.0499 |           | 130.0499 | 1   | E | 16 |          |           |                     |           |
|                     | 231.0975 |           | 231.0975 | 2   | T | 15 | 1545.847 |           | 773.4274            | +0.0631   |
|                     | 345.1405 |           | 345.1405 | 3   | N | 14 | 1444.8   |           | 722.9035            | +0.011683 |
|                     | 458.2245 |           | 458.2245 | 4   | I | 13 | 1330.757 |           | 665.8821            | +0.084538 |
|                     | 573.2515 |           | 573.2515 | 5   | D | 12 | 1217.673 | +0.062541 | 609.34              | +0.118025 |
|                     | 644.2886 |           | 644.2886 | 6   | A | 11 | 1102.646 |           | 1102.646            |           |
|                     | 757.3727 |           | 757.3727 | 7   | I | 10 | 1031.609 |           | 516.308             | -0.007173 |
|                     | 828.4098 |           | 828.4098 | 8   | A | 9  | 918.5247 | +0.054717 | 459.766             | +0.001229 |
| +0.003509           | 450.2271 | +0.292248 | 899.4469 | 9   | A | 8  | 847.4876 | -0.007901 | 847.4876            |           |
|                     | 970.484  | +0.045295 | 970.484  | 10  | A | 7  | 776.4505 | +0.145302 | 776.4505            |           |
|                     | 1083.568 |           | 1083.568 | 11  | I | 6  | 705.4133 |           | 705.4133            |           |
|                     | 1140.59  |           | 1140.59  | 12  | G | 5  | 592.3293 | +0.015137 | 592.3293            |           |
|                     | 1227.622 |           | 1227.622 | 13  | S | 4  | 535.3078 |           | 535.3078            |           |
|                     | 1326.69  |           | 1326.69  | 14  | V | 3  | 448.2758 |           | 448.2758            |           |
|                     | 1463.749 |           | 1463.749 | 15  | H | 2  | 349.2074 |           | 349.2074            |           |
|                     | 1520.77  |           | 1520.77  | 16  | G | 1  | 212.1485 | -0.173308 | 212.1485            |           |
|                     |          |           |          | 17  | K | 0  | 155.127  |           | 155.127             |           |

#### general information

|                       |             |
|-----------------------|-------------|
| Annotation:           | 11 of 17    |
| AminoAcids Coverag    | 65 %        |
| Intensity Coverage:   | 48 %        |
| Protein Localisation: | 166 ... 182 |

Source: 20120510\_VR\_Bsu\_TripleSILACrep1\_T1L1T2\_OG\_F04  
 Scannumber: 25713  
 Protein: BSU02290; psd  
 Peptide Score: 50.5  
 Method: ITMS; CID; 3

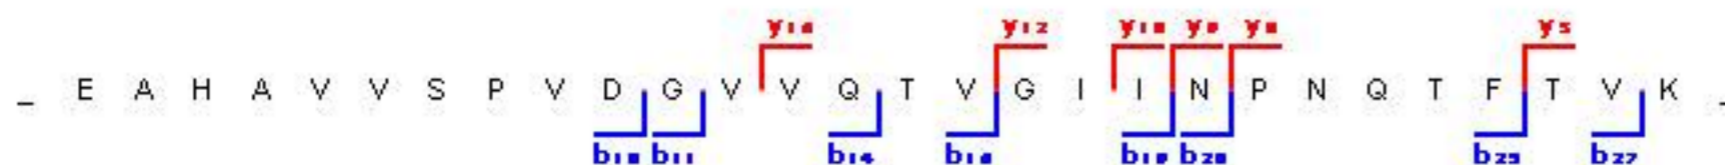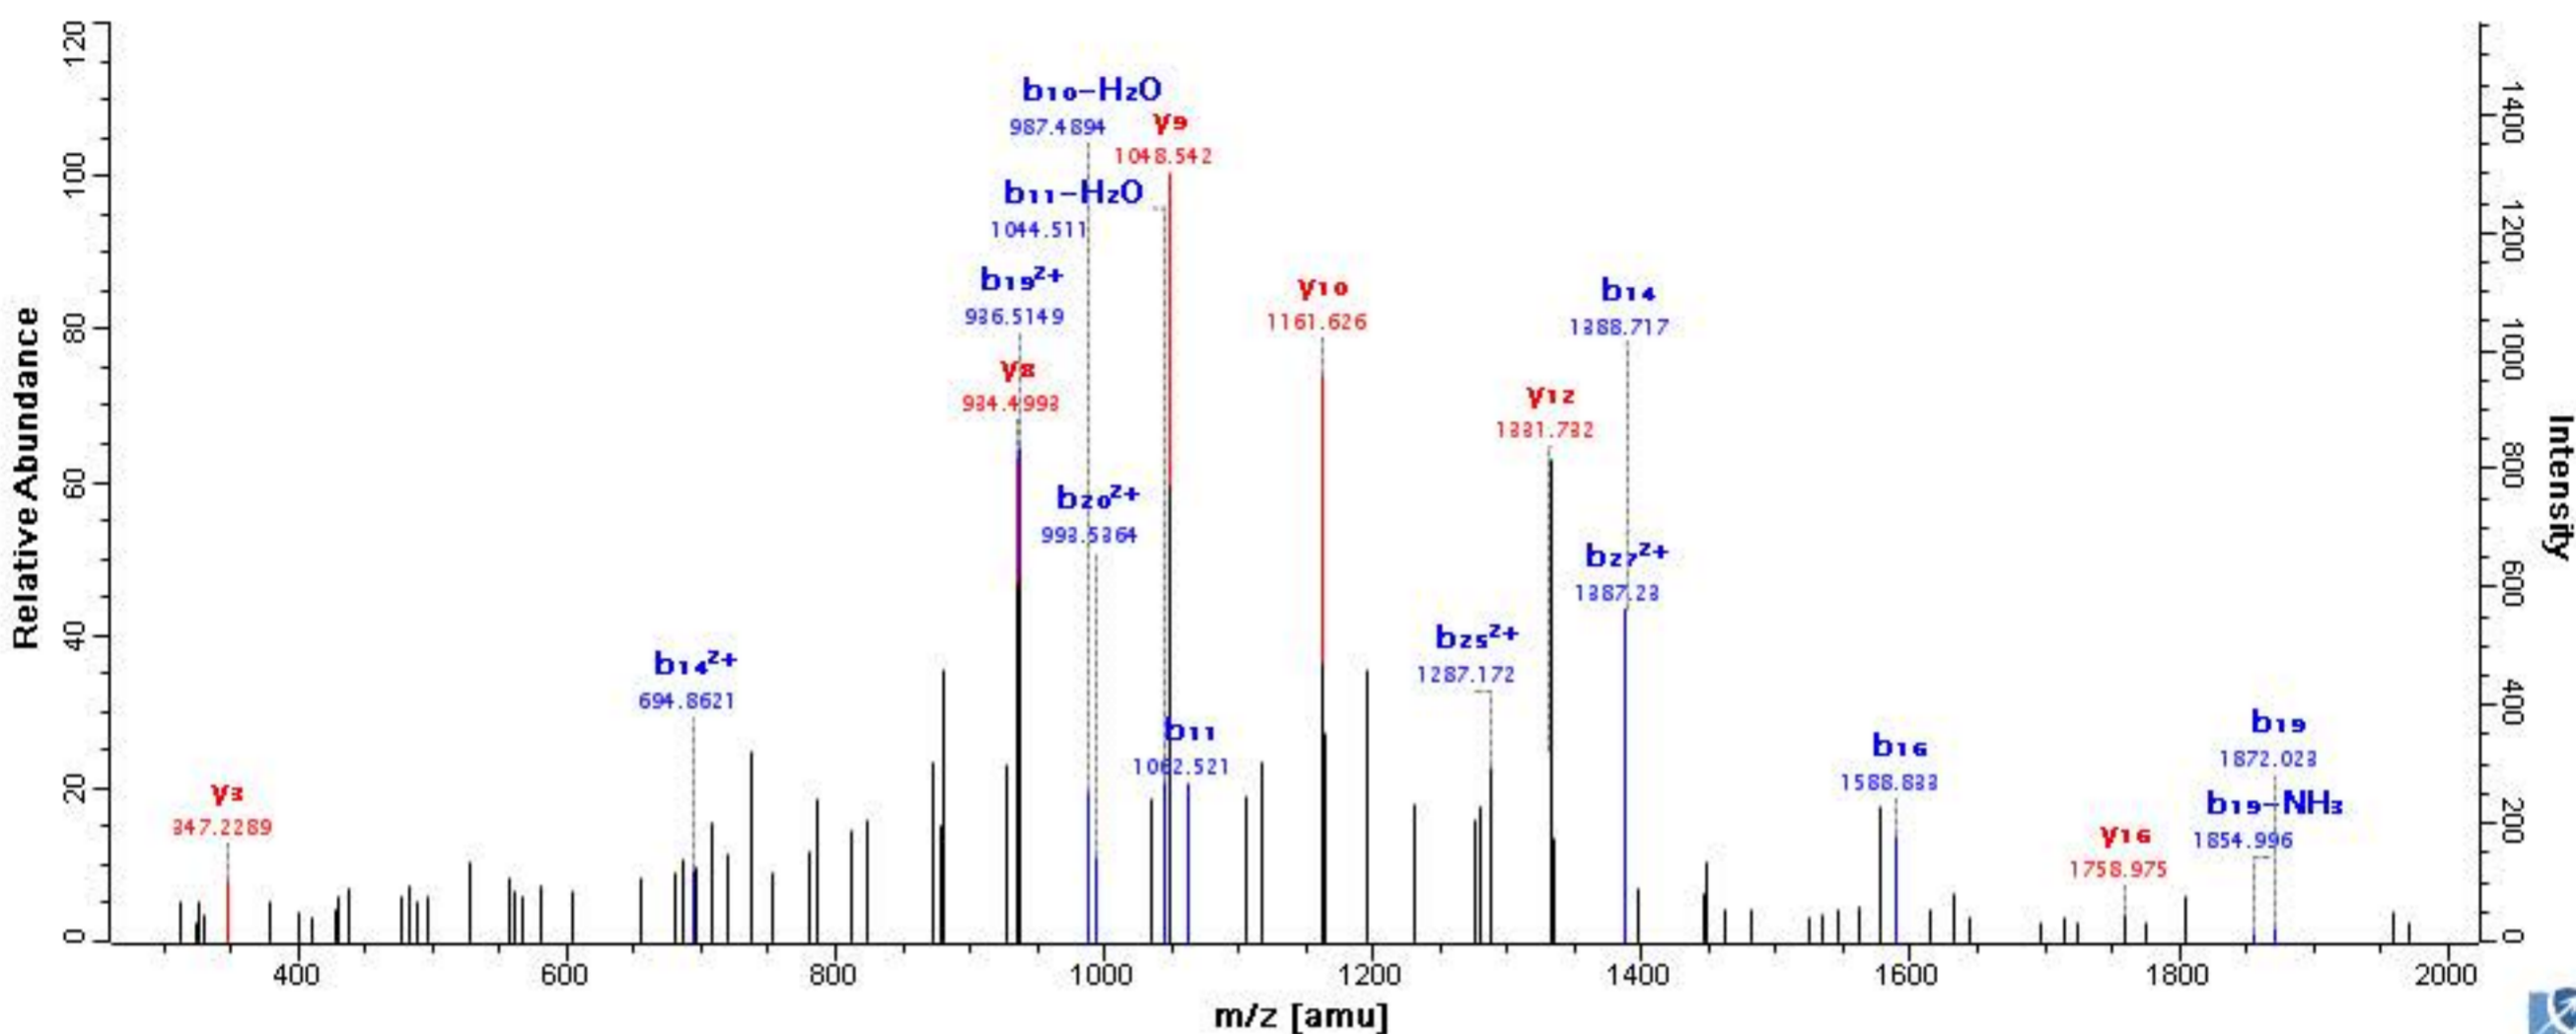

#### precursor information

|                   |                     |
|-------------------|---------------------|
| Mass:             | 2918.55126          |
| m/z:              | System.Collections. |
| Charge:           | System.Collections. |
| Retentiontime:    | System.Collections. |
| Score:            | 50.4978             |
| Mass Error [ppm]: | 0.37273             |
| PEP:              | 0.0015926           |
| Precursor Type:   | ISO                 |

| b <sup>2+</sup> ion |              | b ion      |              |    |     |    | y ion        |            |
|---------------------|--------------|------------|--------------|----|-----|----|--------------|------------|
| Δ dalton            | mass         | Δ dalton   | mass         |    | seq |    | Δ dalton     | mass       |
|                     | 130.04986956 |            | 130.04986956 | 1  | E   | 27 |              |            |
|                     | 201.08698335 |            | 201.08698335 | 2  | A   | 26 | 2790.5148548 |            |
|                     | 338.14589521 |            | 338.14589521 | 3  | H   | 25 | 2719.477741  |            |
|                     | 409.183009   |            | 409.183009   | 4  | A   | 24 | 2582.4188292 |            |
|                     | 508.25142292 |            | 508.25142292 | 5  | V   | 23 | 2511.3817154 |            |
|                     | 607.31983683 |            | 607.31983683 | 6  | V   | 22 | 2412.3133015 |            |
|                     | 694.35186524 |            | 694.35186524 | 7  | S   | 21 | 2313.2448876 |            |
|                     | 791.4046291  |            | 791.4046291  | 8  | P   | 20 | 2226.2128592 |            |
|                     | 890.47304301 |            | 890.47304301 | 9  | V   | 19 | 2129.1600953 |            |
|                     | 1005.499986  |            | 1005.499986  | 10 | D   | 18 | 2030.0916814 |            |
|                     | 1062.5214498 | -0.1838033 | 1062.5214498 | 11 | G   | 17 | 1915.0647384 |            |
|                     | 1161.5898637 |            | 1161.5898637 | 12 | V   | 16 | 1858.0432746 |            |
|                     | 1260.6582776 |            | 1260.6582776 | 13 | V   | 15 | 1758.9748607 | +0.2755055 |
| +0.2095895          | 694.86206579 | -0.4308444 | 1388.7168551 | 14 | Q   | 14 | 1659.9064468 |            |
|                     | 1489.7645336 |            | 1489.7645336 | 15 | T   | 13 | 1531.8478693 |            |
|                     | 1588.8329475 | +0.0896599 | 1588.8329475 | 16 | V   | 12 | 1430.8001908 |            |
|                     | 1645.8544112 |            | 1645.8544112 | 17 | G   | 11 | 1331.7317769 | +0.2148784 |
|                     | 1758.9384752 |            | 1758.9384752 | 18 | I   | 10 | 1274.7103132 |            |
| +0.3921967          | 936.51490783 | +0.2826366 | 1872.0225392 | 19 | I   | 9  | 1161.6262492 | +0.0206014 |
| +0.4442803          | 993.53637155 |            | 1986.0654666 | 20 | N   | 8  | 1048.5421852 | +0.0637718 |
|                     | 2083.1182305 |            | 2083.1182305 | 21 | P   | 7  | 934.49925776 | +0.1786597 |
|                     | 2197.1611579 |            | 2197.1611579 | 22 | N   | 6  | 837.44649391 |            |
|                     | 2325.2197354 |            | 2325.2197354 | 23 | Q   | 5  | 723.40356646 |            |
|                     | 2426.2674139 |            | 2426.2674139 | 24 | T   | 4  | 595.34498895 |            |
| +0.1452203          | 1287.1715522 |            | 2573.3358278 | 25 | F   | 3  | 494.29731048 |            |
|                     | 2674.3835063 |            | 2674.3835063 | 26 | T   | 2  | 347.22889656 | +0.1514745 |
| -0.0278161          | 1387.2295983 |            | 2773.4519202 | 27 | V   | 1  | 246.18121809 |            |
|                     |              |            |              | 28 | K   | 0  | 147.11280417 |            |

#### general information

|                       |            |
|-----------------------|------------|
| Annotation:           | 15 of 28   |
| AminoAcids Coverage:  | 54 %       |
| Intensity Coverage:   | 35 %       |
| Protein Localisation: | 81 ... 108 |

Source: 20120510\_VR\_Bsu\_TripleSILACrep1\_T1L1T2\_OG\_F06  
 Scannumber: 15712  
 Protein: BSU02260; ybfK  
 Peptide Score: 71.24  
 Method: ITMS; CID; 3

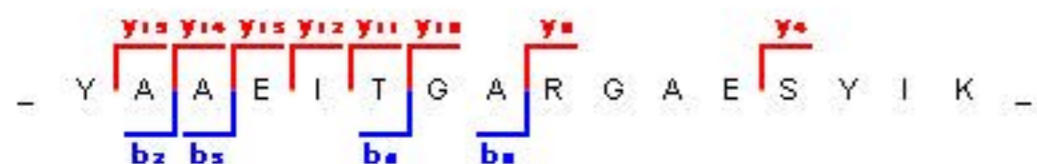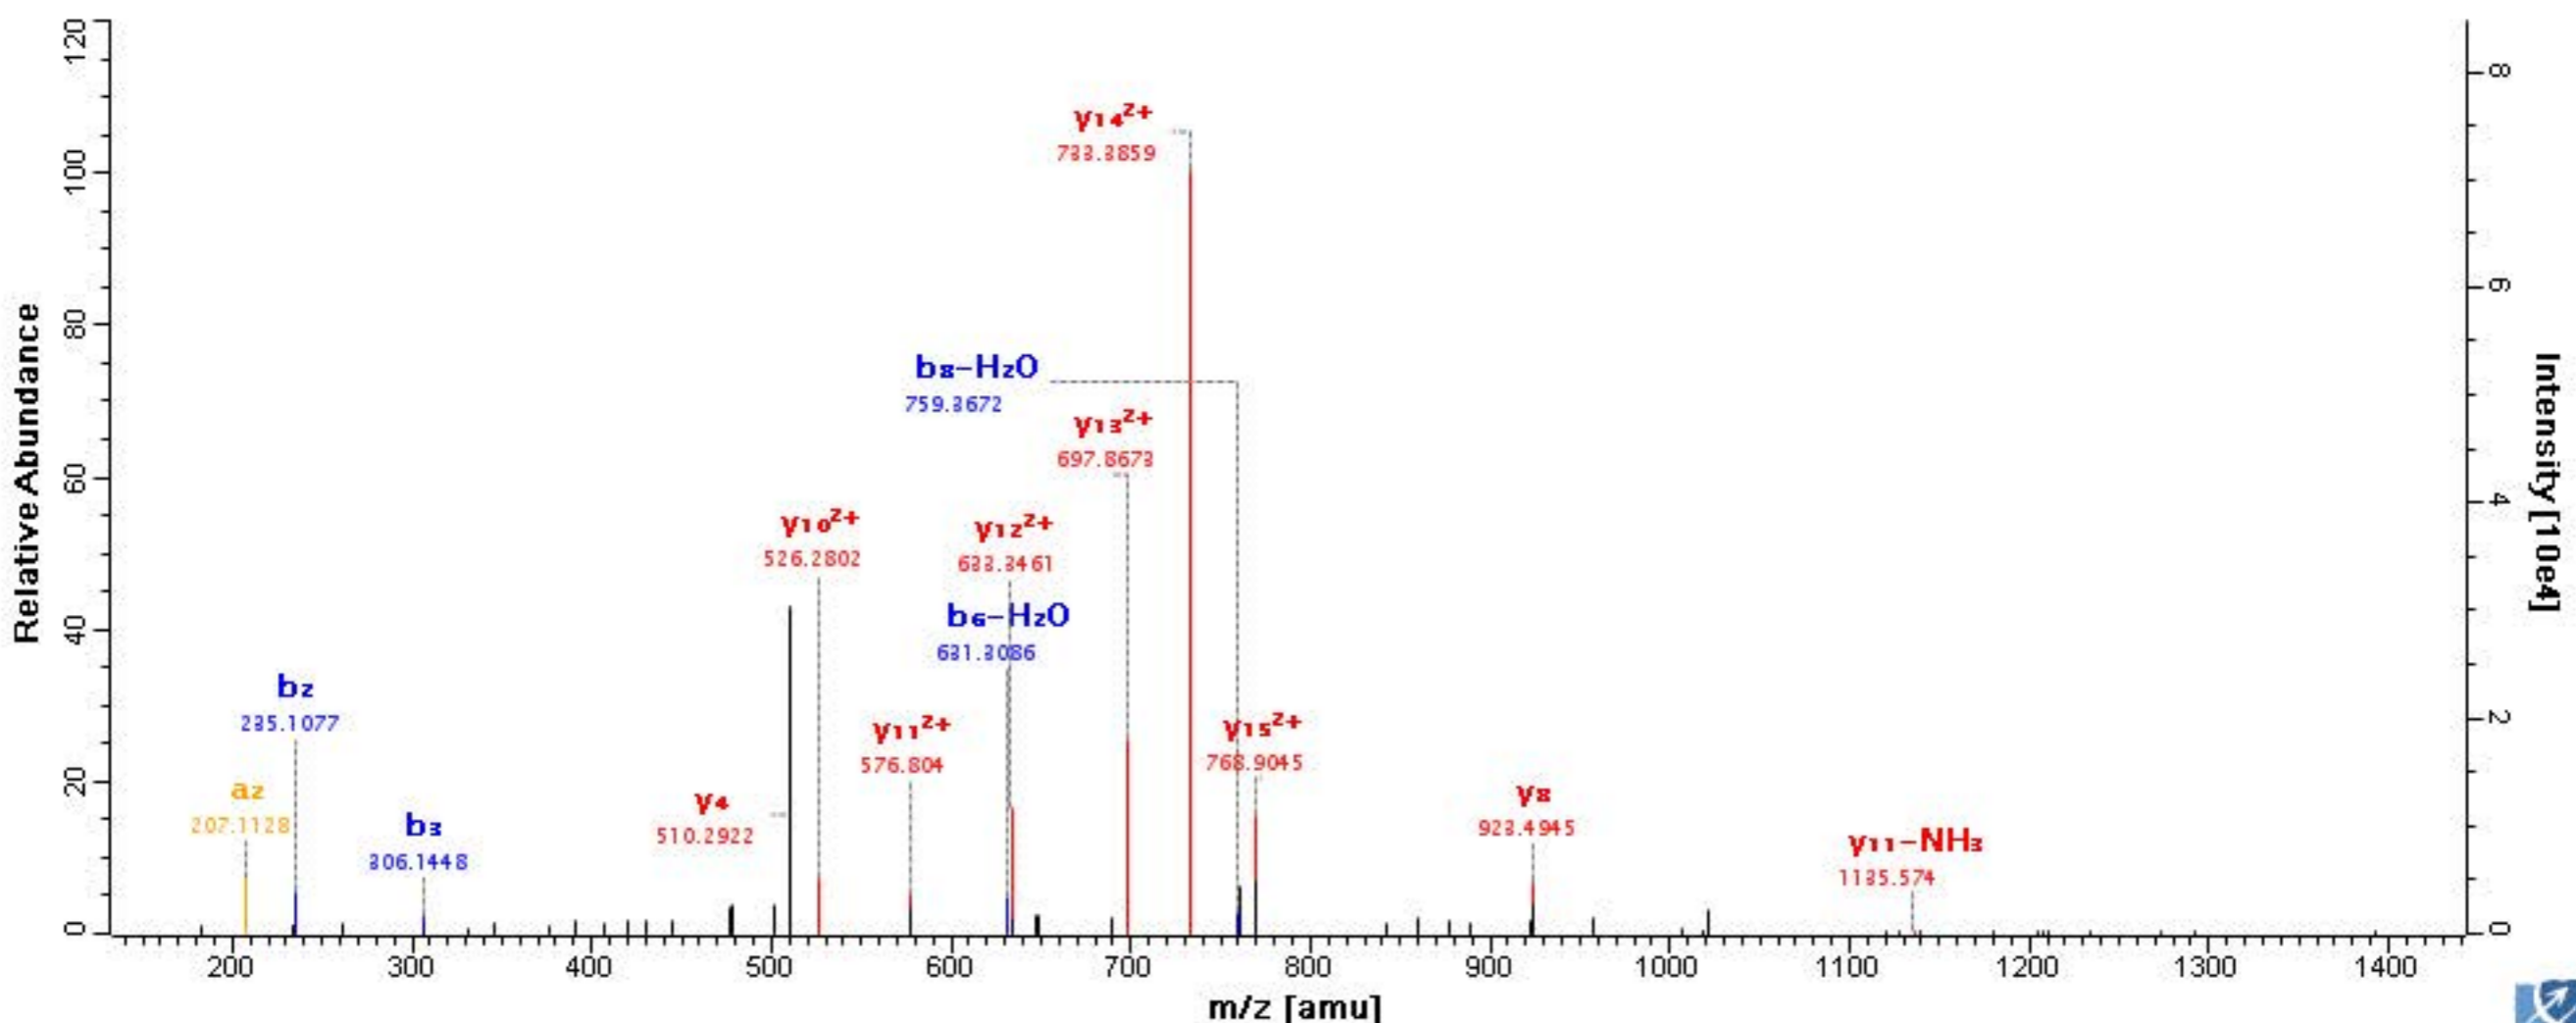

#### precursor information

|                   |                     |
|-------------------|---------------------|
| Mass:             | 1698.85965          |
| m/z:              | System.Collections. |
| Charge:           | System.Collections. |
| Retentiontime:    | System.Collections. |
| Score:            | 71.24082            |
| Mass Error [ppm]: | 1.1465              |
| PEP:              | 0.011645            |
| Precursor Type:   | ISO                 |

| a ion    |          | b ion     |          |    |     |    | y ion    |           | y <sup>2+</sup> ion |           |
|----------|----------|-----------|----------|----|-----|----|----------|-----------|---------------------|-----------|
| Δ dalton | mass     | Δ dalton  | mass     |    | seq |    | Δ dalton | mass      | Δ dalton            | mass      |
|          | 136.0757 |           | 164.0706 | 1  | Y   | 15 |          |           |                     |           |
| +0.16634 | 207.1128 | -0.046424 | 235.1077 | 2  | A   | 14 | 1536.802 |           | 768.9045            | +0.105914 |
|          | 278.1499 | +0.049107 | 306.1448 | 3  | A   | 13 | 1465.765 |           | 733.3859            | +0.261739 |
|          | 407.1925 |           | 435.1874 | 4  | E   | 12 | 1394.727 |           | 697.8673            | +0.289268 |
|          | 520.2766 |           | 548.2715 | 5  | I   | 11 | 1265.685 |           | 633.3461            | +0.077105 |
|          | 621.3243 |           | 649.3192 | 6  | T   | 10 | 1152.601 |           | 576.804             | +0.040158 |
|          | 678.3457 |           | 706.3406 | 7  | G   | 9  | 1051.553 |           | 526.2802            | +0.089388 |
|          | 749.3828 |           | 777.3777 | 8  | A   | 8  | 994.5316 |           | 994.5316            |           |
|          | 905.4839 |           | 933.4789 | 9  | R   | 7  | 923.4945 | +0.046814 | 923.4945            |           |
|          | 962.5054 |           | 990.5003 | 10 | G   | 6  | 767.3934 |           | 767.3934            |           |
|          | 1033.543 |           | 1061.537 | 11 | A   | 5  | 710.3719 |           | 710.3719            |           |
|          | 1162.585 |           | 1190.58  | 12 | E   | 4  | 639.3348 |           | 639.3348            |           |
|          | 1249.617 |           | 1277.612 | 13 | S   | 3  | 510.2922 | -0.165272 | 510.2922            |           |
|          | 1412.68  |           | 1440.675 | 14 | Y   | 2  | 423.2602 |           | 423.2602            |           |
|          | 1525.765 |           | 1553.759 | 15 | I   | 1  | 260.1969 |           | 260.1969            |           |
|          |          |           |          | 16 | K   | 0  | 147.1128 |           | 147.1128            |           |

#### general information

|                       |             |
|-----------------------|-------------|
| Annotation:           | 9 of 16     |
| AminoAcids Coverag    | 56 %        |
| Intensity Coverage:   | 63 %        |
| Protein Localisation: | 168 ... 183 |

Source: 20120510\_VR\_Bsu\_TripleSILACrep1\_T1L1T2\_OG\_F06  
 Scannumber: 17408  
 Protein: BSU03460; hxlA; yckG  
 Peptide Score: 118.33  
 Method: ITMS; CID; 3

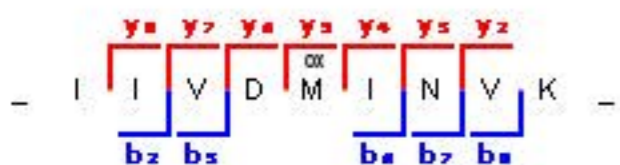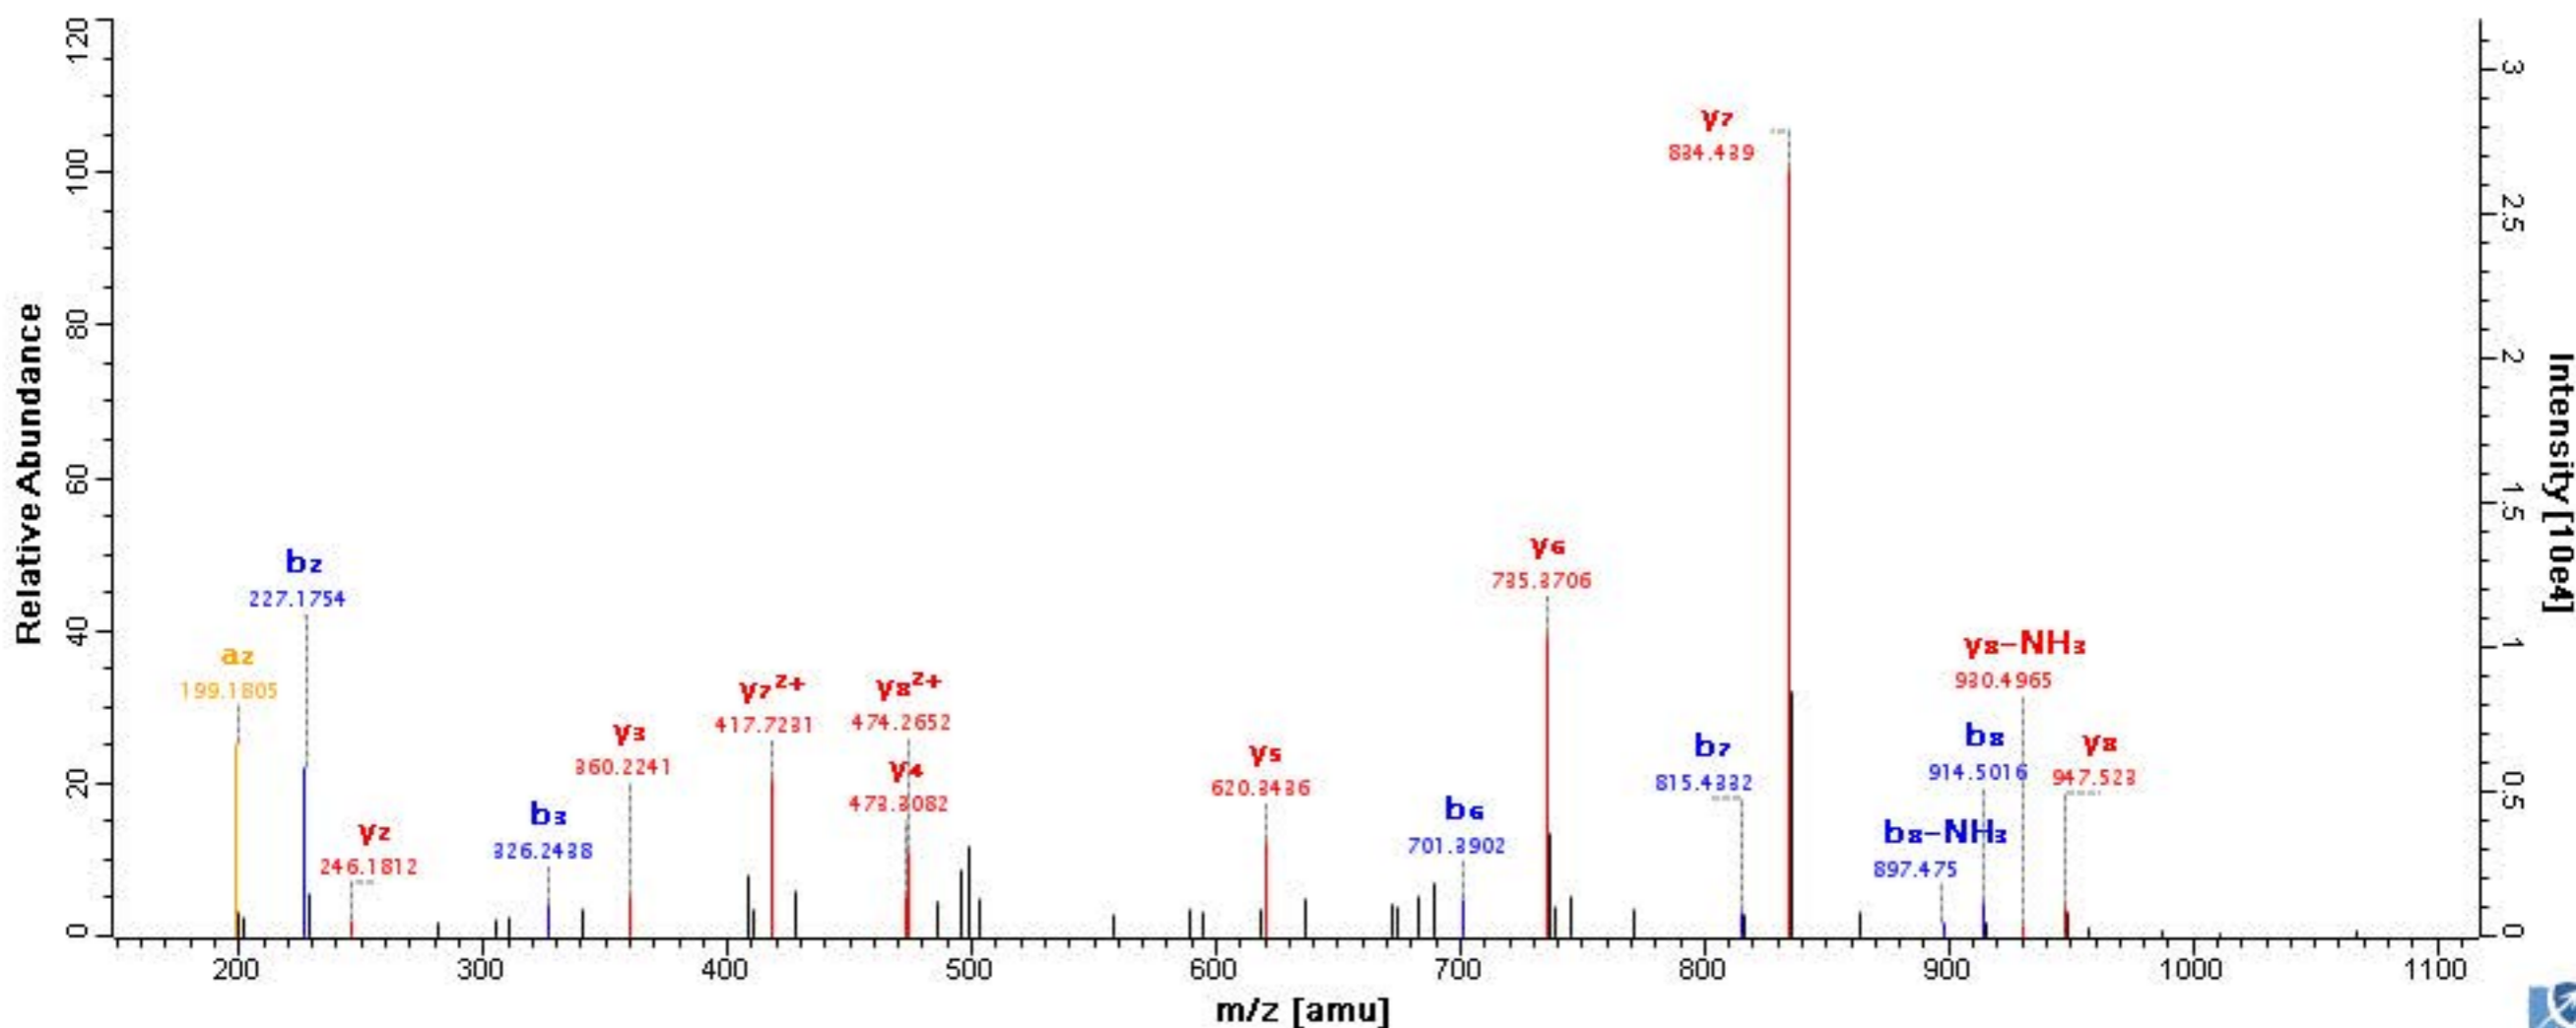

#### precursor information

|                       |                     |
|-----------------------|---------------------|
| Mass:                 | 1059.60022          |
| m/z:                  | System.Collections. |
| Charge:               | System.Collections. |
| Retentiontime:        | System.Collections. |
| Score:                | 118.3341            |
| Mass Error [ppm]:     | 0.37768             |
| PEP:                  | 0.0015587           |
| g Precursor Type:     | ISO                 |
| Annotation:           | 7 of 9              |
| AminoAcids Coverag    | 78 %                |
| Intensity Coverage:   | 60 %                |
| Protein Localisation: | 106 ... 114         |

| a ion    |          | b ion     |          | seq |   |   | y ion    |           | y <sup>2+</sup> ion |           |
|----------|----------|-----------|----------|-----|---|---|----------|-----------|---------------------|-----------|
| Δ dalton | mass     | Δ dalton  | mass     |     |   |   | Δ dalton | mass      | Δ dalton            | mass      |
|          | 86.09643 |           | 114.0913 | 1   | I | 8 |          |           |                     |           |
| -0.07496 | 199.1805 | -0.064015 | 227.1754 | 2   | I | 7 | 947.523  | +0.09605  | 474.2652            | +0.050521 |
|          | 298.2489 | +0.174639 | 326.2438 | 3   | V | 6 | 834.439  | +0.009704 | 417.7231            | +0.195885 |
|          | 413.2758 |           | 441.2708 | 4   | D | 5 | 735.3706 | +0.031182 | 735.3706            |           |
|          | 560.3112 |           | 588.3062 | 5   | M | 4 | 620.3436 | +0.0201   | 620.3436            |           |
|          | 673.3953 | +0.081028 | 701.3902 | 6   | I | 3 | 473.3082 | +0.202655 | 473.3082            |           |
|          | 787.4382 | -0.066087 | 815.4332 | 7   | N | 2 | 360.2241 | -0.026483 | 360.2241            |           |
|          | 886.5067 | +0.047262 | 914.5016 | 8   | V | 1 | 246.1812 | +0.123042 | 246.1812            |           |
|          |          |           |          | 9   | K | 0 | 147.1128 |           | 147.1128            |           |

Source: 20120510\_VR\_Bsu\_TripleSILACrep1\_T1L1T2\_OG\_F06  
 Scannumber: 19845  
 Protein: BSU18070; plsY; yne5  
 Peptide Score: 180.07  
 Method: ITMS; CID; 3

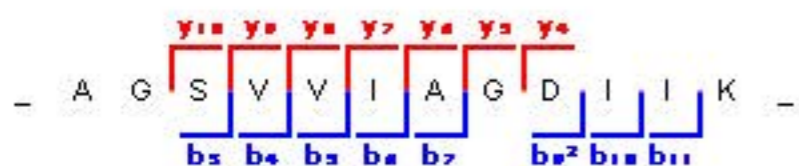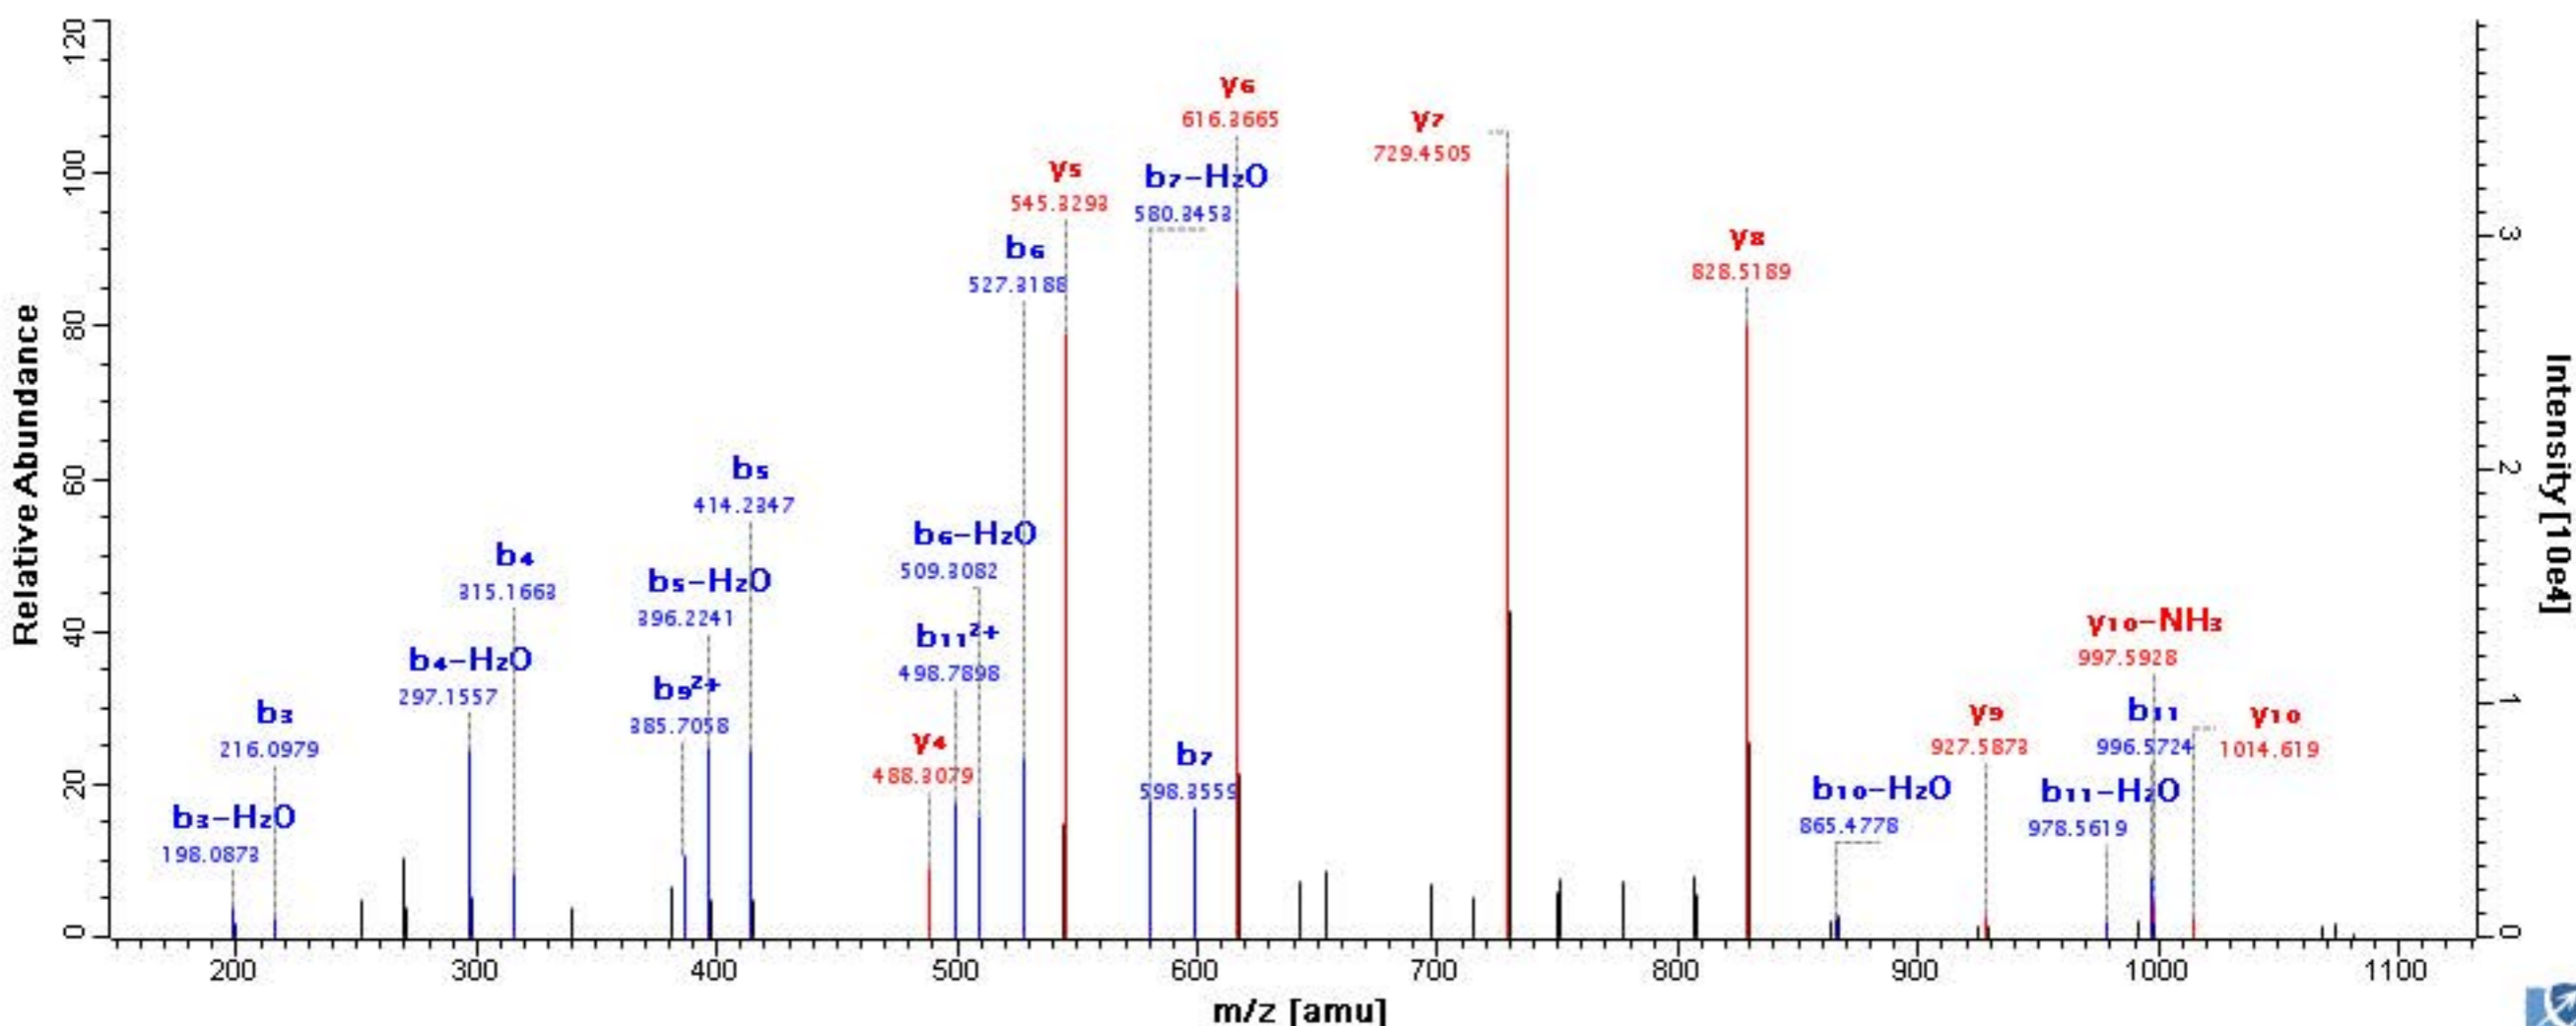

**precursor information**

|                   |                     |
|-------------------|---------------------|
| Mass:             | 1141.67048          |
| m/z:              | System.Collections. |
| Charge:           | System.Collections. |
| Retentiontime:    | System.Collections. |
| Score:            | 180.0659            |
| Mass Error [ppm]: | -0.17149            |
| PEP:              | 4.0071E-26          |
| Precursor Type:   | MULTI               |

**general information**

|                       |           |
|-----------------------|-----------|
| Annotation:           | 9 of 12   |
| AminoAcids Coverag    | 75 %      |
| Intensity Coverage:   | 72 %      |
| Protein Localisation: | 52 ... 63 |

| b <sup>2+</sup> ion |              | b ion      |              |     | y ion |          |                         |
|---------------------|--------------|------------|--------------|-----|-------|----------|-------------------------|
| Δ dalton            | mass         | Δ dalton   | mass         | seq |       | Δ dalton | mass                    |
|                     | 72.044390254 |            | 72.044390254 | 1   | A     | 11       |                         |
|                     | 129.06585398 |            | 129.06585398 | 2   | G     | 10       | 1071.6408366            |
|                     | 216.09788239 | +0.0317258 | 216.09788239 | 3   | S     | 9        | 1014.6193729 +0.1070065 |
|                     | 315.1662963  | -0.0906737 | 315.1662963  | 4   | V     | 8        | 927.58734449 +0.1655852 |
|                     | 414.23471022 | -0.0854182 | 414.23471022 | 5   | V     | 7        | 828.51893057 +0.018545  |
|                     | 527.3187742  | -0.0201902 | 527.3187742  | 6   | I     | 6        | 729.45051666 +0.0200034 |
|                     | 598.35588799 | +0.0513996 | 598.35588799 | 7   | A     | 5        | 616.36645267 +0.011416  |
|                     | 655.37735171 |            | 655.37735171 | 8   | G     | 4        | 545.32933889 +0.0283882 |
| +0.4445745          | 385.70578561 |            | 770.40429474 | 9   | D     | 3        | 488.30787516 +0.1211409 |
|                     | 883.48835872 |            | 883.48835872 | 10  | I     | 2        | 373.28093213            |
| +0.4466616          | 498.78984959 | +0.2027848 | 996.5724227  | 11  | I     | 1        | 260.19686815            |
|                     |              |            |              | 12  | K     | 0        | 147.11280417            |

Source: 20120510\_VR\_Bsu\_TripleSILACrep1\_T1L1T2\_OG\_F06  
 Scannumber: 20170  
 Protein: BSU07860; yfkL  
 Peptide Score: 91.32  
 Method: ITMS; CID; 3

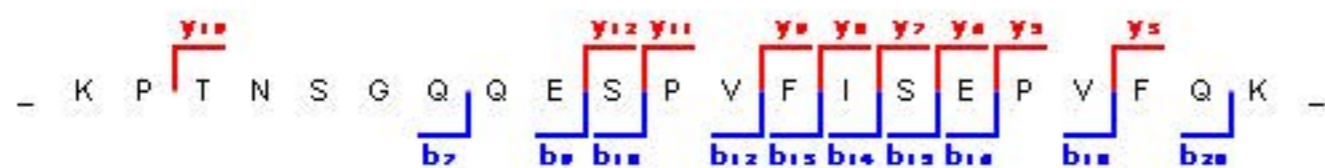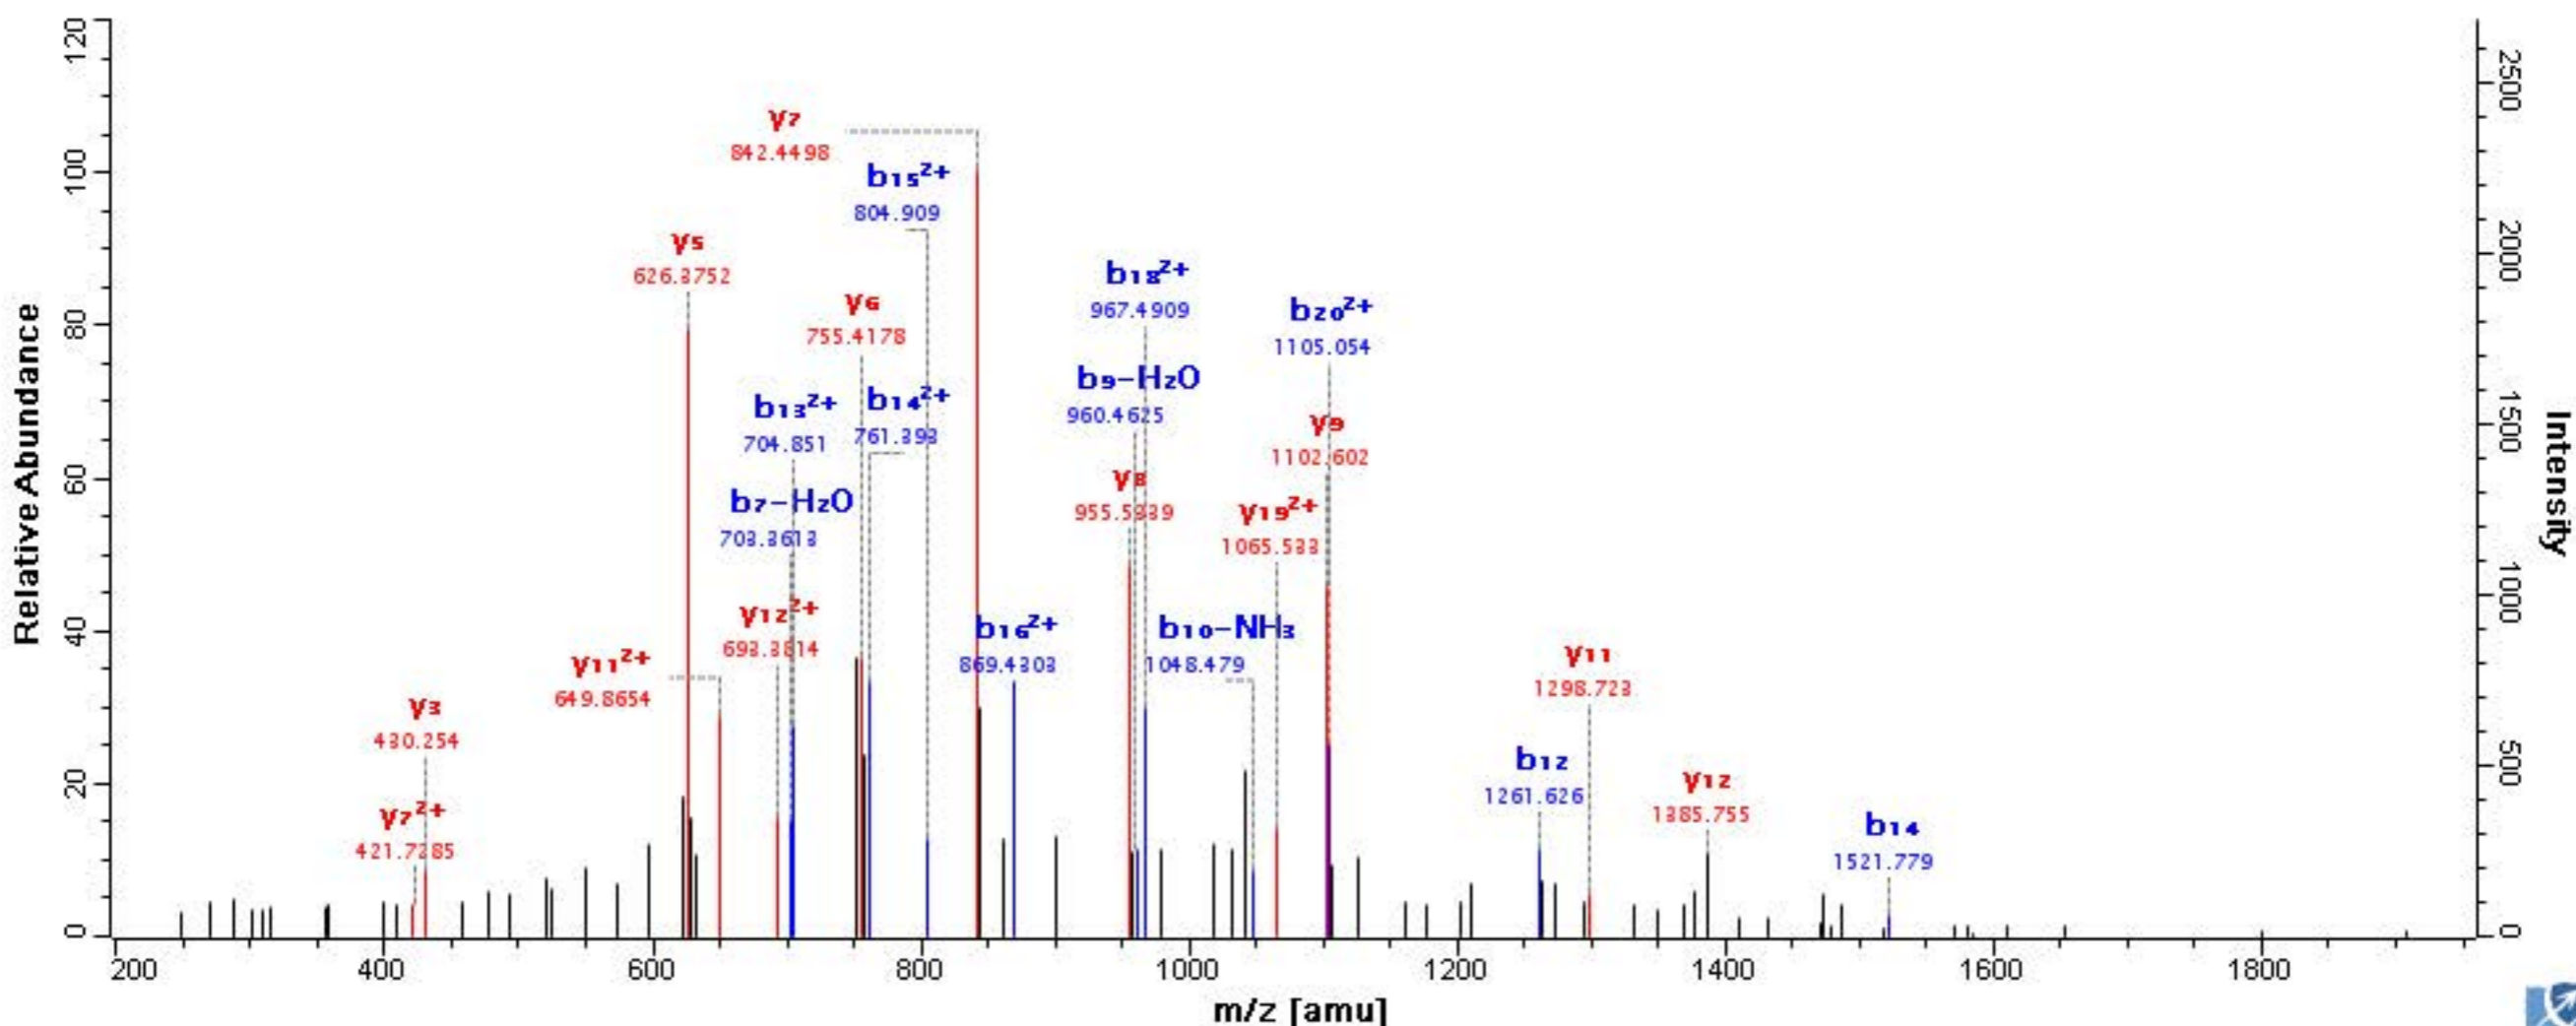

#### precursor information

|                   |                     |
|-------------------|---------------------|
| Mass:             | 2346.18571          |
| m/z:              | System.Collections. |
| Charge:           | System.Collections. |
| Retentiontime:    | System.Collections. |
| Score:            | 91.31718            |
| Mass Error [ppm]: | 0.056087            |
| PEP:              | 2.5057E-08          |
| Precursor Type:   | MULTI               |

| b <sup>2+</sup> ion |          | b ion     |          |    |     |    | y ion    |           | y <sup>2+</sup> ion |           |
|---------------------|----------|-----------|----------|----|-----|----|----------|-----------|---------------------|-----------|
| Δ dalton            | mass     | Δ dalton  | mass     |    | seq |    | Δ dalton | mass      | Δ dalton            | mass      |
|                     | 137.1164 |           | 137.1164 | 1  | K   | 20 |          |           |                     |           |
|                     | 234.1692 |           | 234.1692 | 2  | P   | 19 | 2227.112 |           | 2227.112            |           |
|                     | 335.2169 |           | 335.2169 | 3  | T   | 18 | 2130.059 |           | 1065.533            | +0.191797 |
|                     | 449.2598 |           | 449.2598 | 4  | N   | 17 | 2029.012 |           | 2029.012            |           |
|                     | 536.2918 |           | 536.2918 | 5  | S   | 16 | 1914.969 |           | 1914.969            |           |
|                     | 593.3133 |           | 593.3133 | 6  | G   | 15 | 1827.937 |           | 1827.937            |           |
|                     | 721.3719 |           | 721.3719 | 7  | Q   | 14 | 1770.915 |           | 1770.915            |           |
|                     | 849.4305 |           | 849.4305 | 8  | Q   | 13 | 1642.857 |           | 1642.857            |           |
|                     | 978.473  |           | 978.473  | 9  | E   | 12 | 1514.798 |           | 1514.798            |           |
|                     | 1065.505 |           | 1065.505 | 10 | S   | 11 | 1385.755 | +0.136612 | 693.3814            | +0.127839 |
|                     | 1162.558 |           | 1162.558 | 11 | P   | 10 | 1298.723 | +0.129212 | 649.8654            | +0.003717 |
|                     | 1261.626 | +0.212369 | 1261.626 | 12 | V   | 9  | 1201.671 |           | 1201.671            |           |
| +0.062541           | 704.851  |           | 1408.695 | 13 | F   | 8  | 1102.602 | +0.077538 | 1102.602            |           |
| -0.037963           | 761.393  | +0.264847 | 1521.779 | 14 | I   | 7  | 955.5339 | +0.24727  | 955.5339            |           |
| -0.139365           | 804.909  |           | 1608.811 | 15 | S   | 6  | 842.4498 | +0.124669 | 421.7285            | -0.370045 |
| +0.309187           | 869.4303 |           | 1737.853 | 16 | E   | 5  | 755.4178 | +0.065023 | 755.4178            |           |
|                     | 1834.906 |           | 1834.906 | 17 | P   | 4  | 626.3752 | +0.005931 | 626.3752            |           |
| +0.487978           | 967.4909 |           | 1933.975 | 18 | V   | 3  | 529.3224 |           | 529.3224            |           |
|                     | 2081.043 |           | 2081.043 | 19 | F   | 2  | 430.254  | -0.047574 | 430.254             |           |
| +0.251386           | 1105.054 |           | 2209.102 | 20 | Q   | 1  | 283.1856 |           | 283.1856            |           |
|                     |          |           |          | 21 | K   | 0  | 155.127  |           | 155.127             |           |

#### general information

|                       |             |
|-----------------------|-------------|
| Annotation:           | 14 of 21    |
| AminoAcids Coverag    | 67 %        |
| Intensity Coverage:   | 57 %        |
| Protein Localisation: | 189 ... 209 |

Source: 20120510\_VR\_Bsu\_TripleSILACrep1\_T1L1T2\_OG\_F06  
 Scannumber: 24002  
 Protein: besA; BSU32010; yuil  
 Peptide Score: 108.71  
 Method: ITMS; CID; 3

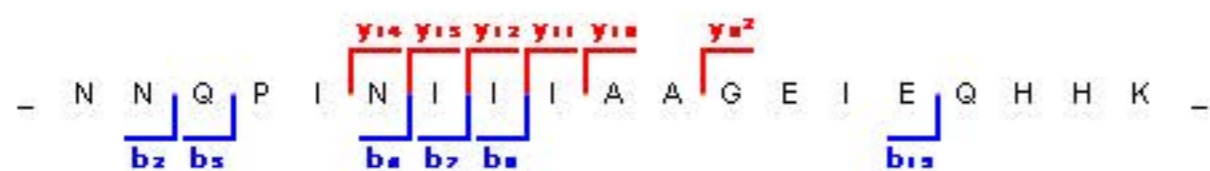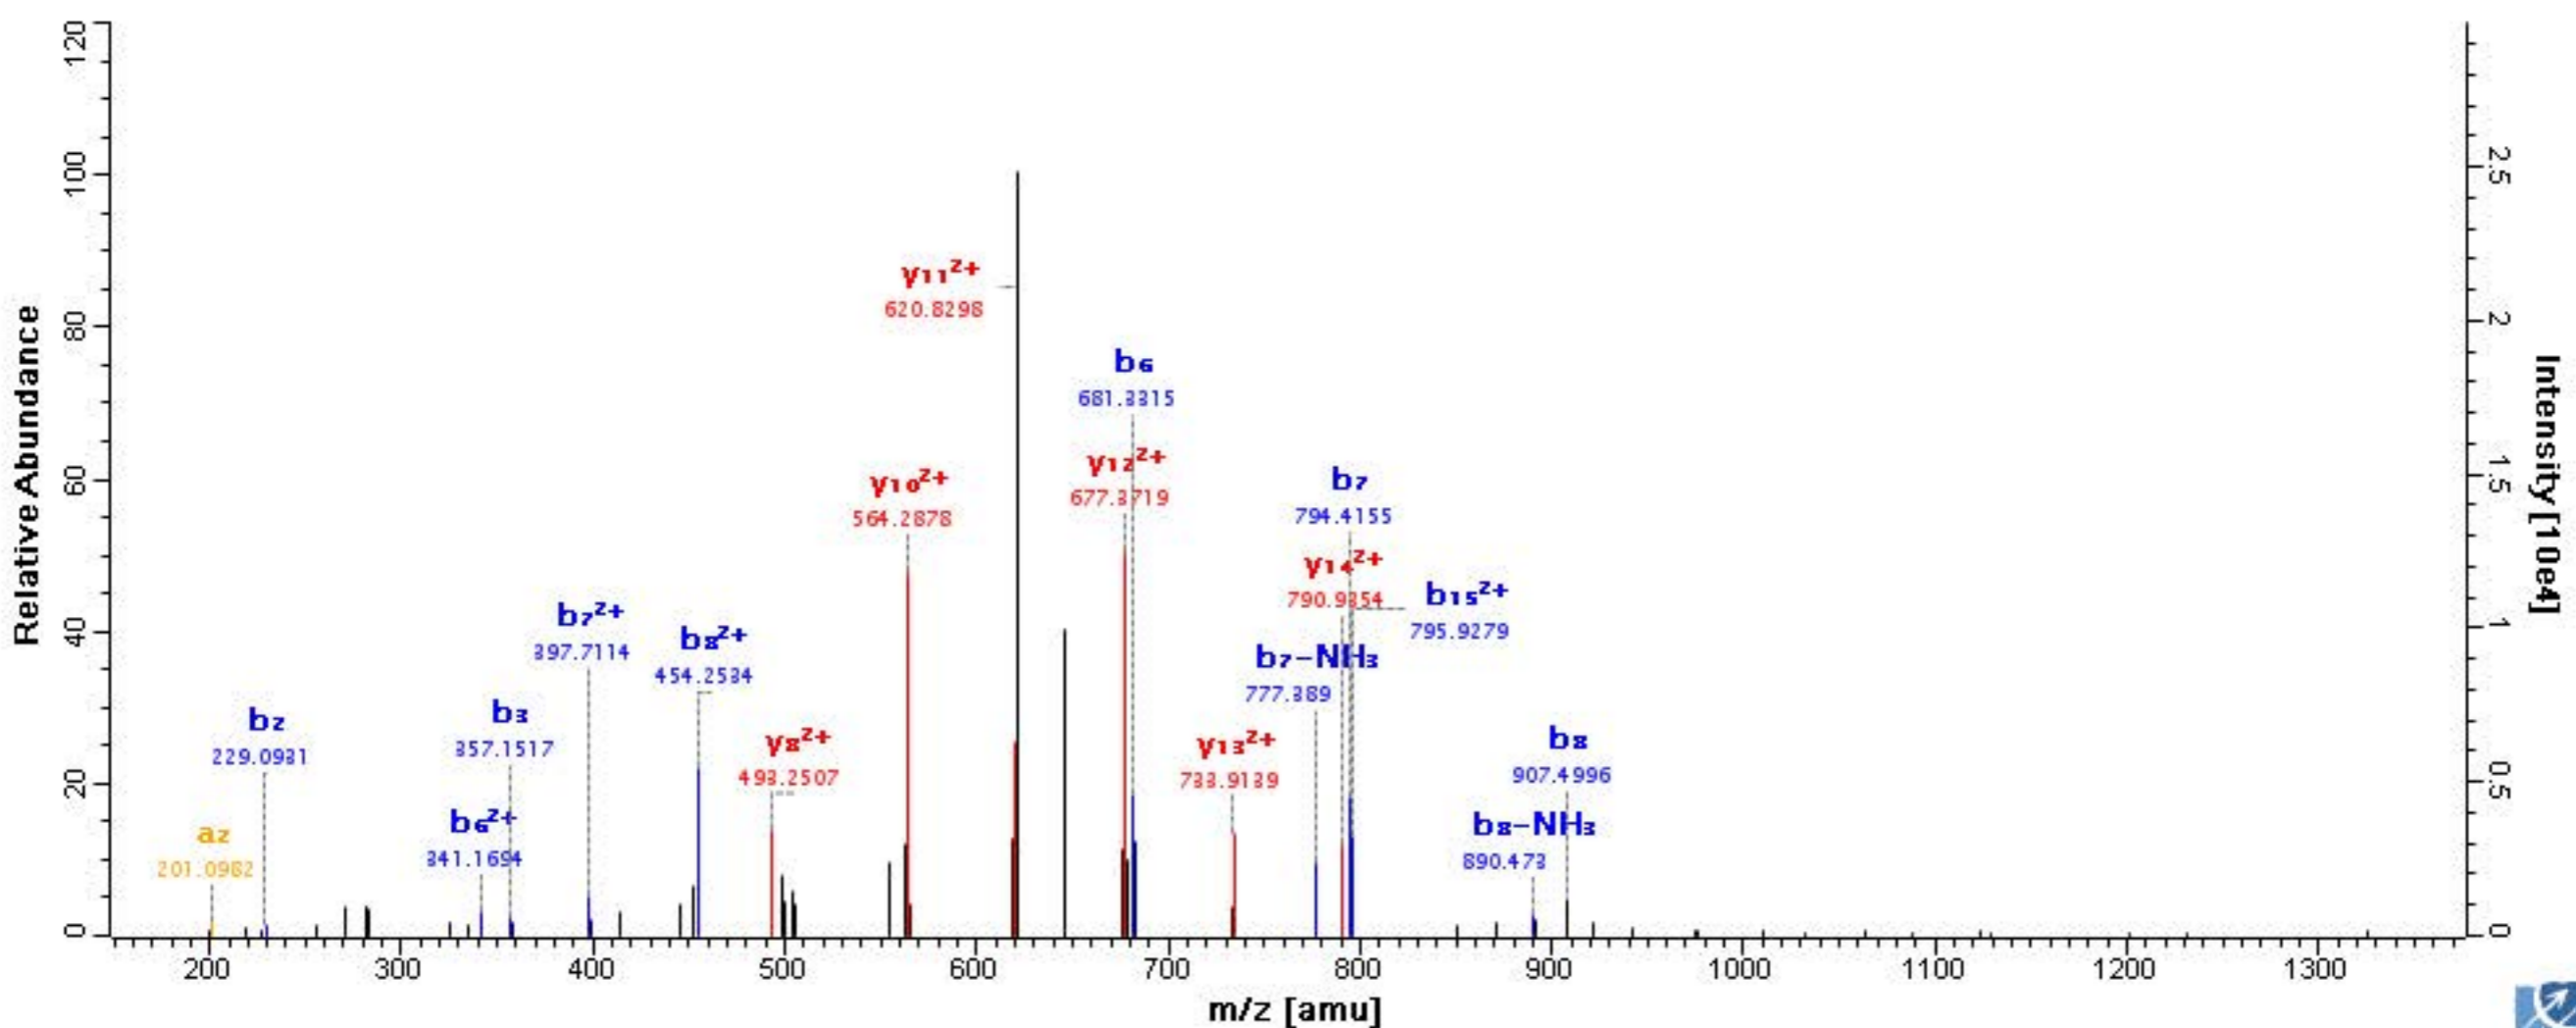

**precursor information**

|                   |                     |
|-------------------|---------------------|
| Mass:             | 2138.12388          |
| m/z:              | System.Collections. |
| Charge:           | System.Collections. |
| Retentiontime:    | System.Collections. |
| Score:            | 108.7129            |
| Mass Error [ppm]: | 0.29502             |
| PEP:              | 1.3262E-16          |
| Precursor Type:   | MULTI               |

| a ion    |         | b <sup>2+</sup> ion |         | b ion    |         |    |     | y ion |          | y <sup>2+</sup> ion |          |          |
|----------|---------|---------------------|---------|----------|---------|----|-----|-------|----------|---------------------|----------|----------|
| Δ dalton | mass    | Δ dalton            | mass    | Δ dalton | mass    |    | seq |       | Δ dalton | mass                | Δ dalton | mass     |
|          | 87.0553 |                     | 115.05  |          | 115.05  | 1  | N   | 18    |          |                     |          |          |
| +0.19062 | 201.098 |                     | 229.093 | +0.09414 | 229.093 | 2  | N   | 17    | 2033.1   |                     | 2033.1   |          |
|          | 329.157 |                     | 357.152 | +0.03158 | 357.152 | 3  | Q   | 16    | 1919.06  |                     | 1919.06  |          |
|          | 426.21  |                     | 454.204 |          | 454.204 | 4  | P   | 15    | 1791     |                     | 1791     |          |
|          | 539.294 |                     | 567.289 |          | 567.289 | 5  | I   | 14    | 1693.95  |                     | 1693.95  |          |
|          | 653.337 | +0.14438            | 681.169 | +0.02974 | 681.331 | 6  | N   | 13    | 1580.86  |                     | 790.935  | +0.2194  |
|          | 766.421 | +0.24947            | 797.711 | +0.11078 | 794.416 | 7  | I   | 12    | 1466.82  |                     | 733.914  | +0.28556 |
|          | 879.505 | +0.30986            | 854.253 | +0.09526 | 807.5   | 8  | I   | 11    | 1353.74  |                     | 677.372  | +0.3490  |
|          | 992.589 |                     | 1020.58 |          | 1020.58 | 9  | I   | 10    | 1240.65  |                     | 620.83   | -0.3815  |
|          | 1063.63 |                     | 1091.62 |          | 1091.62 | 10 | A   | 9     | 1127.57  |                     | 564.288  | +0.2056  |
|          | 1134.66 |                     | 1162.66 |          | 1162.66 | 11 | A   | 8     | 1056.53  |                     | 1056.53  |          |
|          | 1191.68 |                     | 1219.68 |          | 1219.68 | 12 | G   | 7     | 985.494  |                     | 493.251  | +0.0676  |
|          | 1320.73 |                     | 1348.72 |          | 1348.72 | 13 | E   | 6     | 928.473  |                     | 928.473  |          |
|          | 1433.81 |                     | 1461.81 |          | 1461.81 | 14 | I   | 5     | 799.43   |                     | 799.43   |          |
|          | 1562.85 | -0.4005             | 795.928 |          | 1590.85 | 15 | E   | 4     | 686.346  |                     | 686.346  |          |
|          | 1690.91 |                     | 1718.91 |          | 1718.91 | 16 | Q   | 3     | 557.303  |                     | 557.303  |          |
|          | 1827.97 |                     | 1855.97 |          | 1855.97 | 17 | H   | 2     | 429.245  |                     | 429.245  |          |
|          | 1965.03 |                     | 1993.02 |          | 1993.02 | 18 | H   | 1     | 292.186  |                     | 292.186  |          |
|          |         |                     |         |          |         | 19 | K   | 0     | 155.127  |                     | 155.127  |          |

**general information**

|                       |             |
|-----------------------|-------------|
| Annotation:           | 10 of 19    |
| AminoAcids Coverage:  | 53 %        |
| Intensity Coverage:   | 47 %        |
| Protein Localisation: | 211 ... 229 |



Source: 20120510\_VR\_Bsu\_TripleSILACrep1\_T1L1T2\_OG\_F06  
 Scannumber: 24407  
 Protein: BSU32060; yuiD  
 Peptide Score: 126.76  
 Method: ITMS; CID; 3

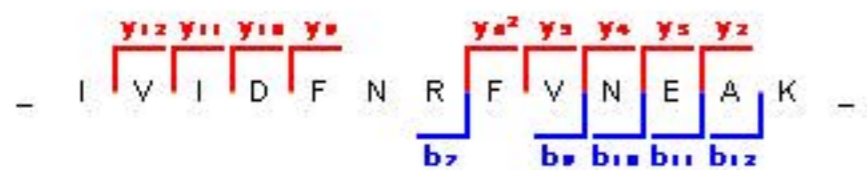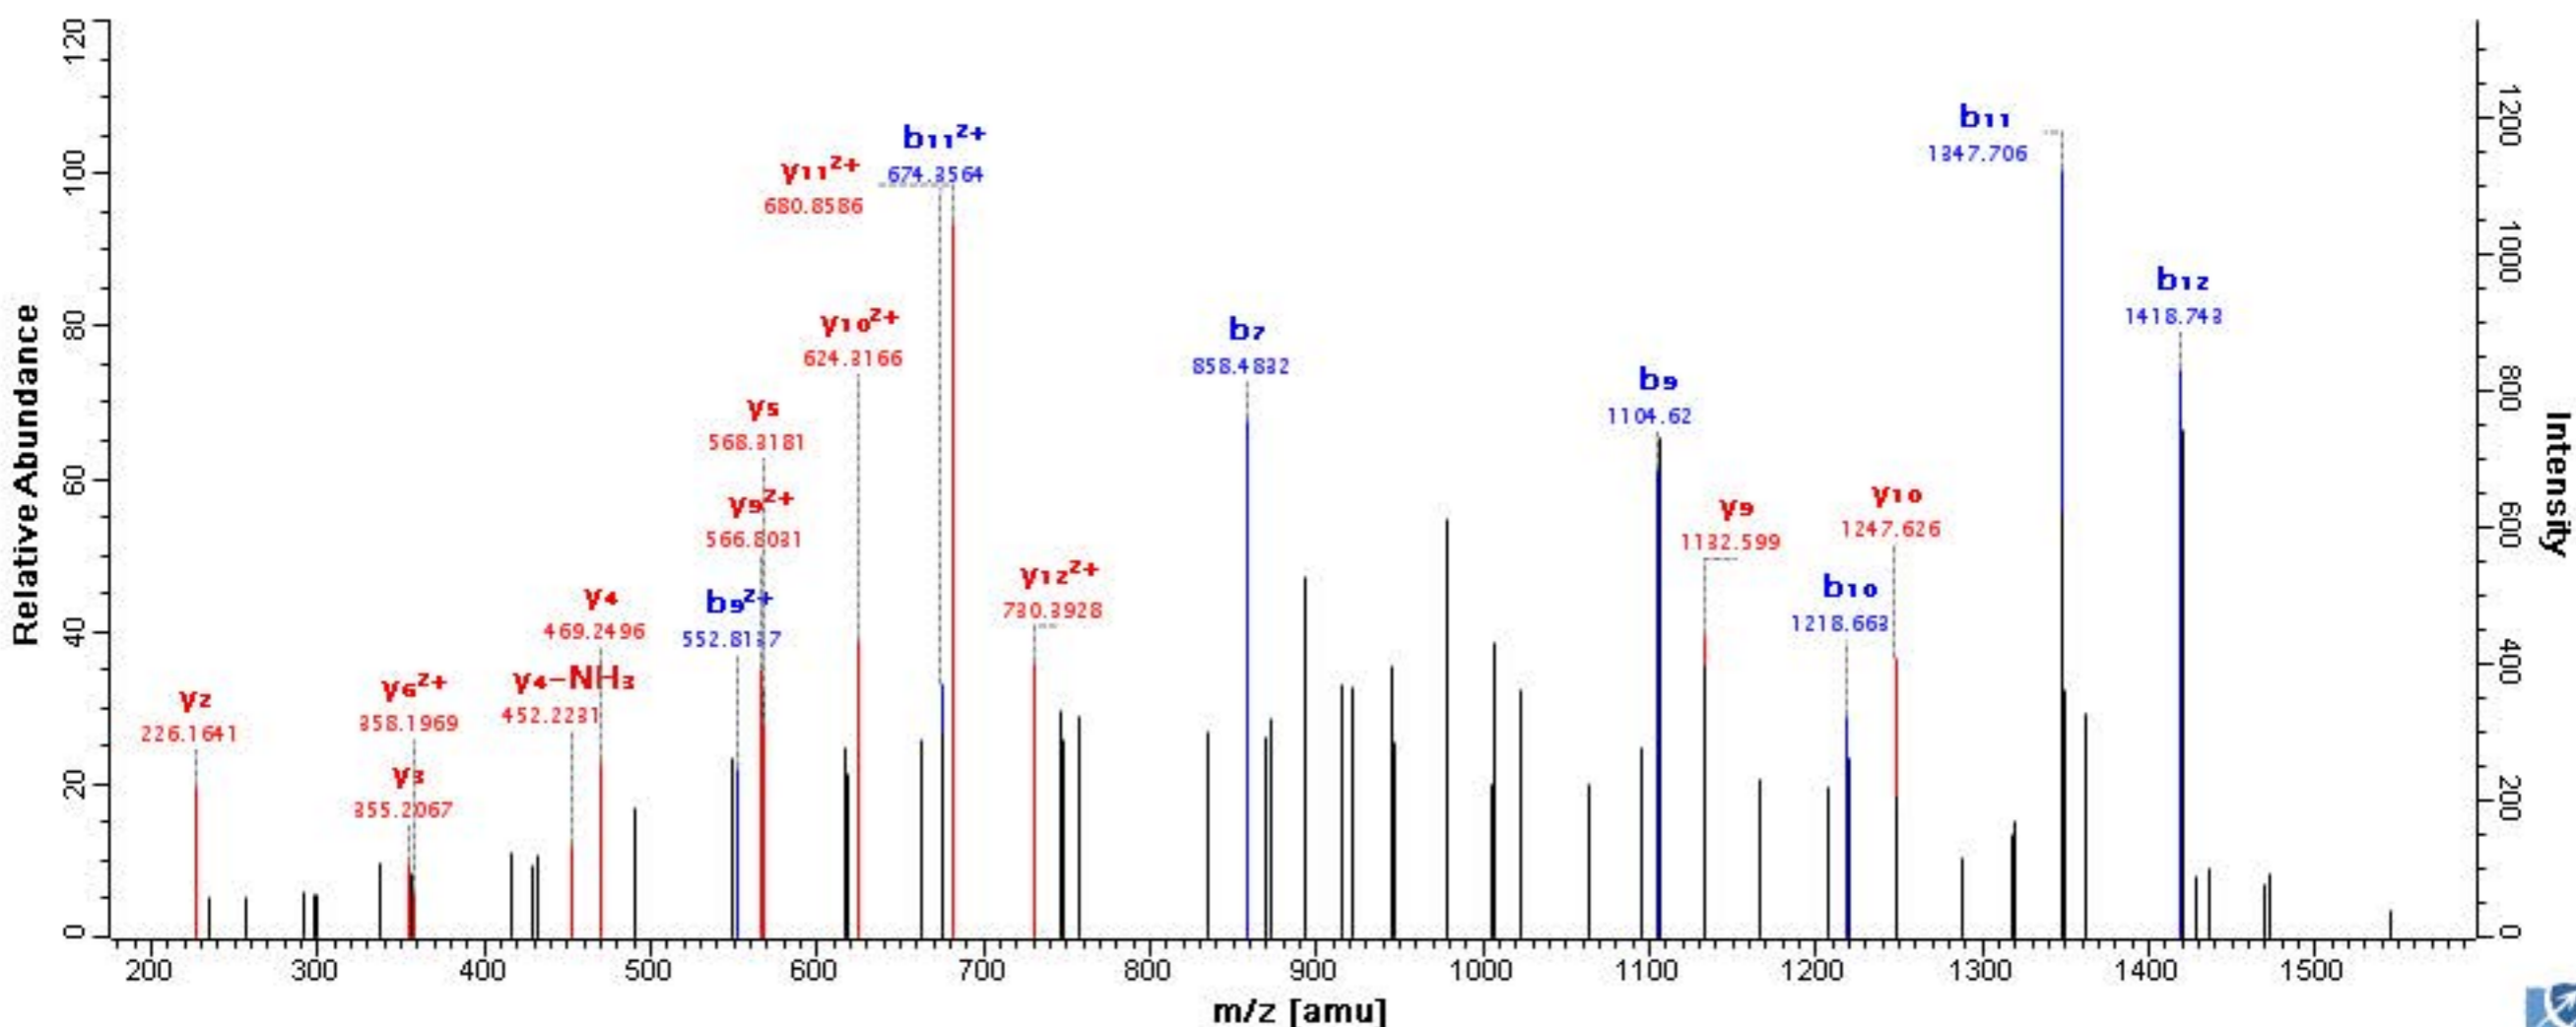

#### precursor information

|                   |                     |
|-------------------|---------------------|
| Mass:             | 1563.84026          |
| m/z:              | System.Collections. |
| Charge:           | System.Collections. |
| Retentiontime:    | System.Collections. |
| Score:            | 126.765             |
| Mass Error [ppm]: | -0.4213             |
| PEP:              | 6.0188E-05          |
| Precursor Type:   | MULTI               |

#### general information

|                       |             |
|-----------------------|-------------|
| Annotation:           | 10 of 13    |
| AminoAcids Coverag    | 77 %        |
| Intensity Coverage:   | 38 %        |
| Protein Localisation: | 102 ... 114 |

| b <sup>2+</sup> ion |          | b ion     |          |     | γ ion |          | γ <sup>2+</sup> ion |           |           |           |
|---------------------|----------|-----------|----------|-----|-------|----------|---------------------|-----------|-----------|-----------|
| Δ dalton            | mass     | Δ dalton  | mass     | seq |       | Δ dalton | mass                | Δ dalton  | mass      |           |
|                     | 114.0913 |           | 114.0913 | 1   | I     | 12       |                     |           |           |           |
|                     | 213.1598 |           | 213.1598 | 2   | V     | 11       | 1459.778            | 730.3928  | +0.004287 |           |
|                     | 326.2438 |           | 326.2438 | 3   | I     | 10       | 1360.71             | 680.8586  | +0.335491 |           |
|                     | 441.2708 |           | 441.2708 | 4   | D     | 9        | 1247.626            | +0.129755 | 624.3166  | -0.01774  |
|                     | 588.3392 |           | 588.3392 | 5   | F     | 8        | 1132.599            | +0.103597 | 566.8031  | +0.073002 |
|                     | 702.3821 |           | 702.3821 | 6   | N     | 7        | 985.5305            |           | 985.5305  |           |
|                     | 858.4832 | -0.002745 | 858.4832 | 7   | R     | 6        | 871.4876            |           | 871.4876  |           |
|                     | 1005.552 |           | 1005.552 | 8   | F     | 5        | 715.3865            |           | 358.1969  | +0.211027 |
| -0.167114           | 552.8137 | -0.026047 | 1104.62  | 9   | V     | 4        | 568.3181            | +0.278689 | 568.3181  |           |
|                     | 1218.663 | +0.179682 | 1218.663 | 10  | N     | 3        | 469.2496            | +0.051937 | 469.2496  |           |
| +0.414882           | 674.3564 | +0.031132 | 1347.706 | 11  | E     | 2        | 355.2067            | +0.173326 | 355.2067  |           |
|                     | 1418.743 | +0.023193 | 1418.743 | 12  | A     | 1        | 226.1641            | +0.099311 | 226.1641  |           |
|                     |          |           |          | 13  | K     | 0        | 155.127             |           | 155.127   |           |

Source: 20120510\_VR\_Bsu\_TripleSILACrep1\_T1L1T2\_OG\_F06  
 Scannumber: 24655  
 Protein: BSU33630; secG; yvaL  
 Peptide Score: 116.86  
 Method: ITMS; CID; 3

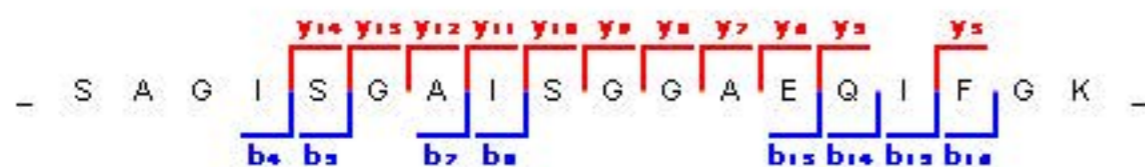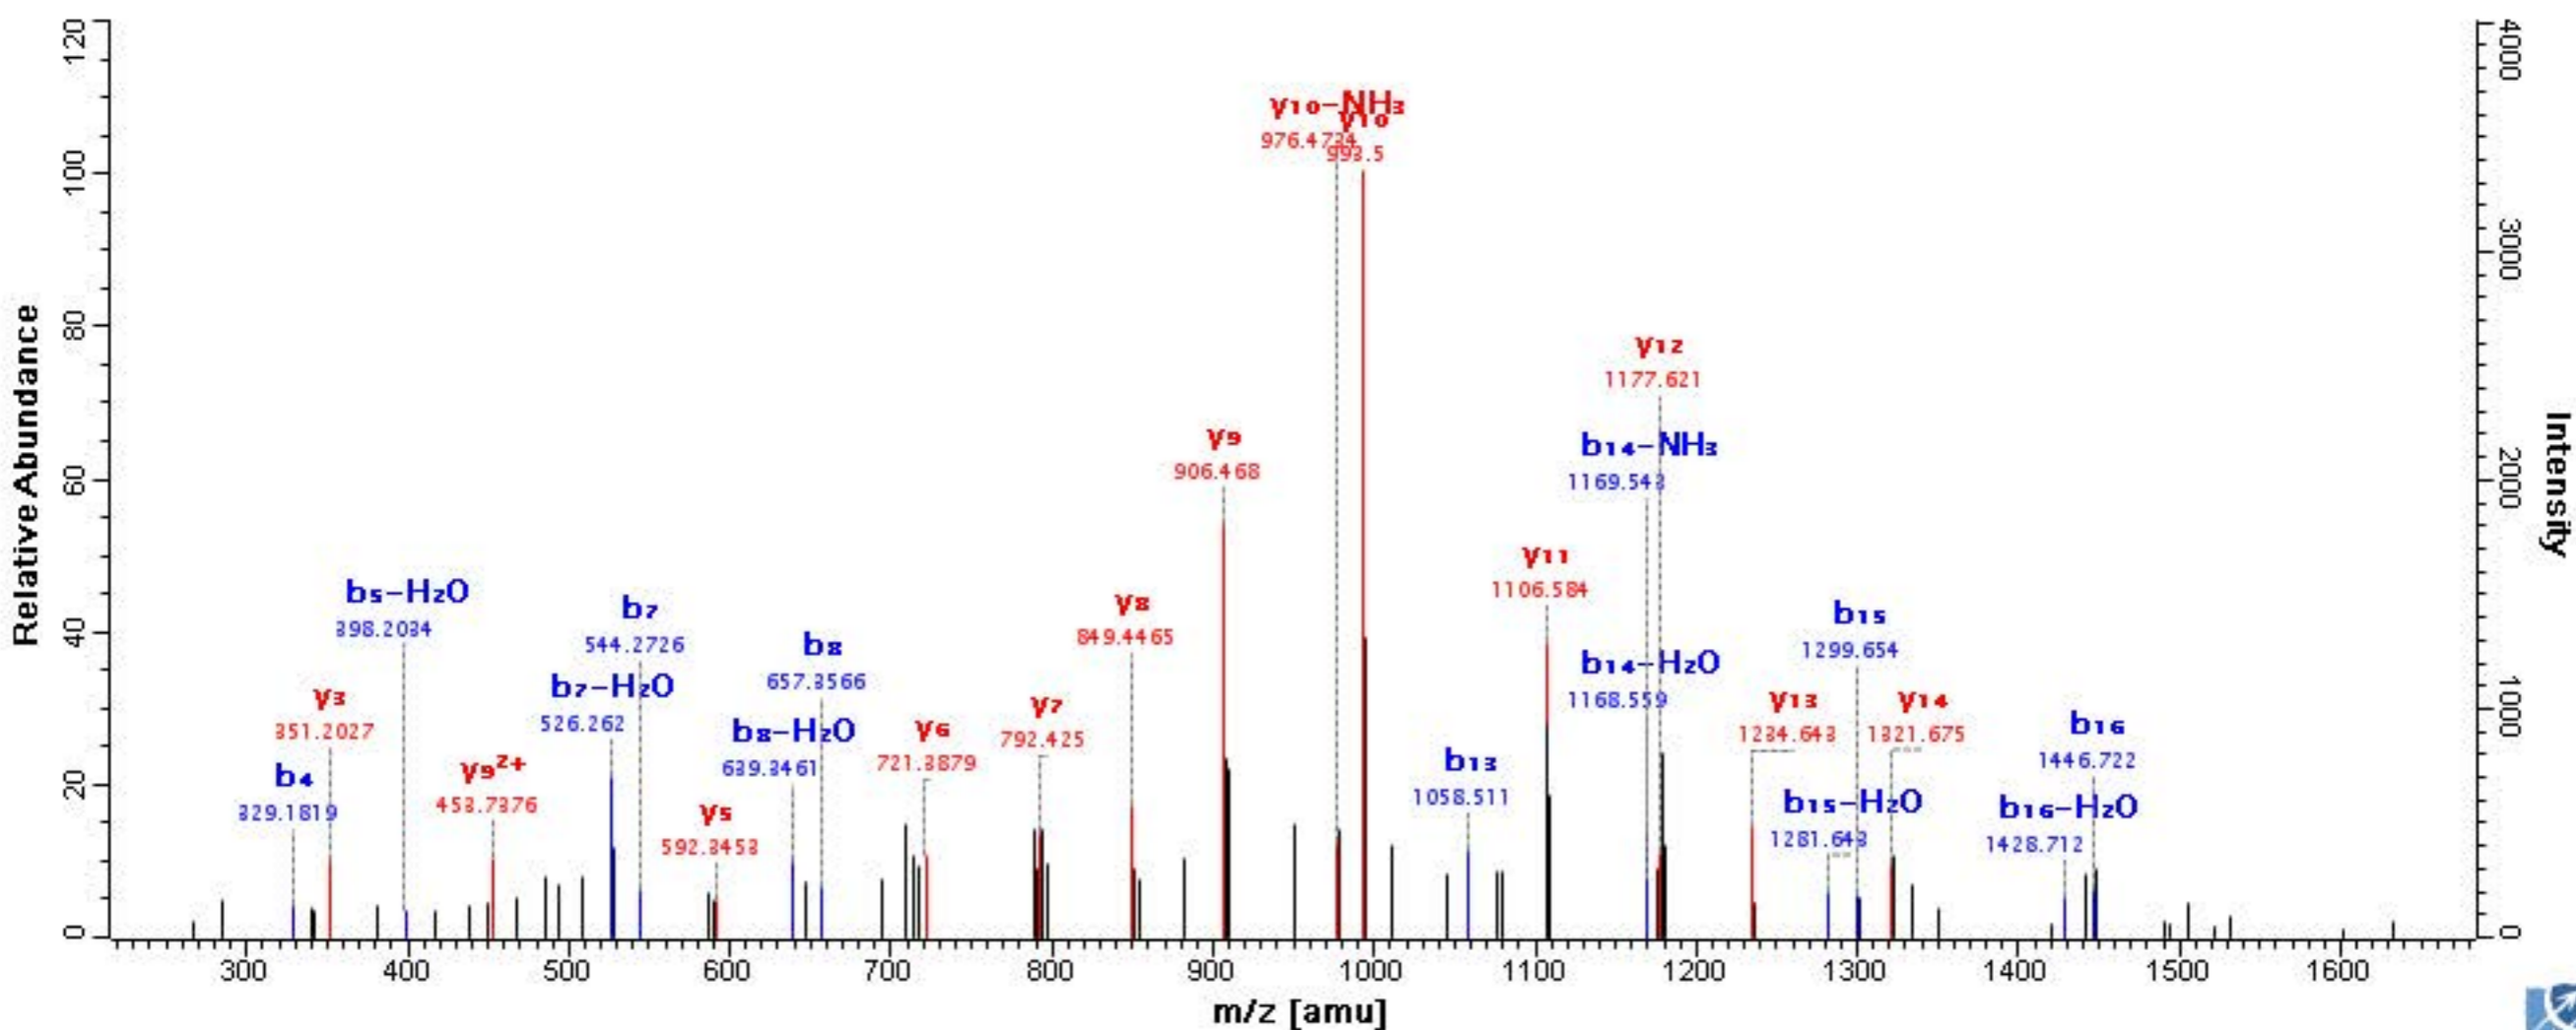

#### precursor information

|                   |                     |
|-------------------|---------------------|
| Mass:             | 1648.84198          |
| m/z:              | System.Collections. |
| Charge:           | System.Collections. |
| Retentiontime:    | System.Collections. |
| Score:            | 116.8621            |
| Mass Error [ppm]: | -0.043833           |
| PEP:              | 7.7955E-12          |
| Precursor Type:   | MULTI               |

#### general information

|                       |           |
|-----------------------|-----------|
| Annotation:           | 13 of 18  |
| AminoAcids Coverag    | 72 %      |
| Intensity Coverage:   | 44 %      |
| Protein Localisation: | 27 ... 44 |

| b ion      |              |    |     |    | y ion        |            | y <sup>2+</sup> ion |            |
|------------|--------------|----|-----|----|--------------|------------|---------------------|------------|
| Δ dalton   | mass         |    | seq |    | Δ dalton     | mass       | Δ dalton            | mass       |
|            | 88.039304876 | 1  | S   | 17 |              |            |                     |            |
|            | 159.07641866 | 2  | A   | 16 | 1562.8172974 |            | 1562.8172974        |            |
|            | 216.09788239 | 3  | G   | 15 | 1491.7801836 |            | 1491.7801836        |            |
| +0.3128656 | 329.18194637 | 4  | I   | 14 | 1434.7587199 |            | 1434.7587199        |            |
|            | 416.21397478 | 5  | S   | 13 | 1321.6746559 | +0.1126976 | 1321.6746559        |            |
|            | 473.2354385  | 6  | G   | 12 | 1234.6426275 | +0.2168695 | 1234.6426275        |            |
| -0.12619   | 544.27255229 | 7  | A   | 11 | 1177.6211638 | +0.1281038 | 1177.6211638        |            |
| +0.3154418 | 657.35661627 | 8  | I   | 10 | 1106.58405   | +0.0853836 | 1106.58405          |            |
|            | 744.38864468 | 9  | S   | 9  | 993.49998604 | +0.1419207 | 993.49998604        |            |
|            | 801.4101084  | 10 | G   | 8  | 906.46795763 | +0.0343007 | 453.73761705        | -0.4336009 |
|            | 858.43157213 | 11 | G   | 7  | 849.44649391 | -0.1234348 | 849.44649391        |            |
|            | 929.46868591 | 12 | A   | 6  | 792.42503019 | +0.0280948 | 792.42503019        |            |
| +0.1978274 | 1058.511279  | 13 | E   | 5  | 721.3879164  | +0.2116319 | 721.3879164         |            |
|            | 1186.5698565 | 14 | Q   | 4  | 592.3453233  | +0.1269667 | 592.3453233         |            |
| +0.2233988 | 1299.6539205 | 15 | I   | 3  | 464.28674579 |            | 464.28674579        |            |
| +0.2693648 | 1446.7223344 | 16 | F   | 2  | 351.20268181 | +0.0028236 | 351.20268181        |            |
|            | 1503.7437981 | 17 | G   | 1  | 204.13426789 |            | 204.13426789        |            |
|            |              | 18 | K   | 0  | 147.11280417 |            | 147.11280417        |            |

Source: 20120510\_VR\_Bsu\_TripleSILACrep1\_T1L1T2\_OG\_F06  
 Scannumber: 29342  
 Protein: BSU40140; yydj  
 Peptide Score: 142.07  
 Method: ITMS; CID; 3

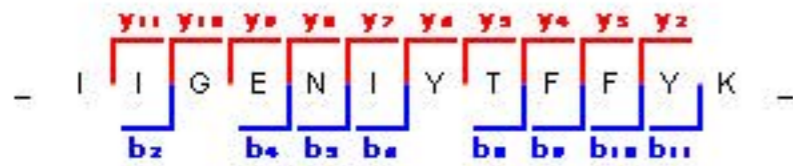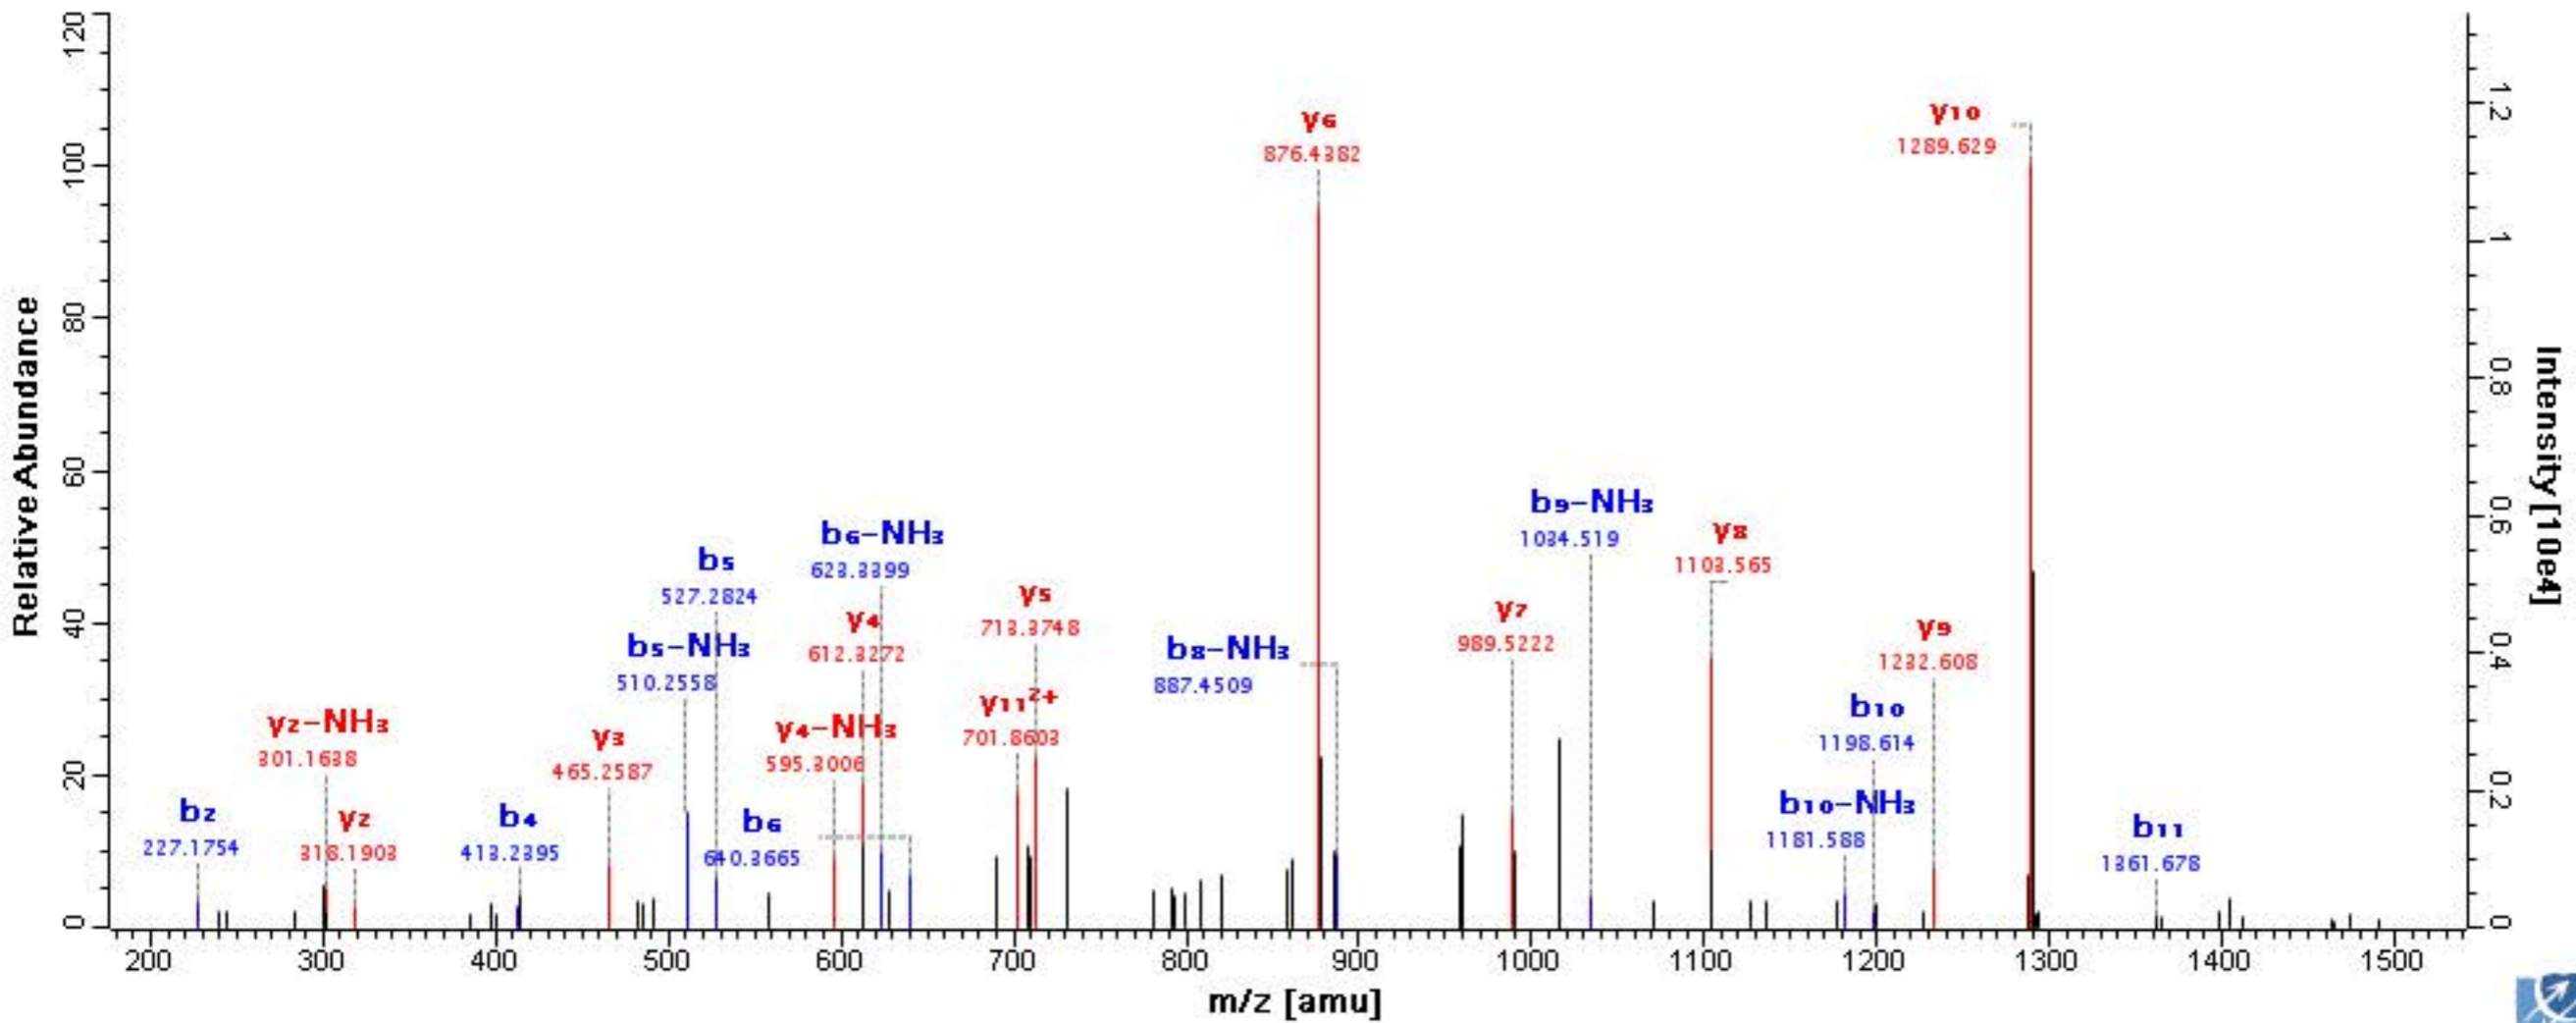

**precursor information**

|                   |                     |
|-------------------|---------------------|
| Mass:             | 1506.77564          |
| m/z:              | System.Collections. |
| Charge:           | System.Collections. |
| Retentiontime:    | System.Collections. |
| Score:            | 142.0682            |
| Mass Error [ppm]: | -0.15214            |
| PEP:              | 5.8785E-08          |
| Precursor Type:   | MULTI               |

**general information**

|                       |           |
|-----------------------|-----------|
| Annotation:           | 10 of 12  |
| AminoAcids Coverag    | 83 %      |
| Intensity Coverage:   | 52 %      |
| Protein Localisation: | 84 ... 95 |

| b ion        |              |    |     |    | gamma ion    |            | gamma <sup>2+</sup> ion |            |
|--------------|--------------|----|-----|----|--------------|------------|-------------------------|------------|
| delta dalton | mass         |    | seq |    | delta dalton | mass       | delta dalton            | mass       |
|              | 114.09134045 | 1  | I   | 11 |              |            |                         |            |
| +0.1176101   | 227.17540443 | 2  | I   | 10 | 1402.7132786 |            | 701.86027753            | +0.4125496 |
|              | 284.19686815 | 3  | G   | 9  | 1289.6292146 | +0.0930754 | 1289.6292146            |            |
| -0.0816243   | 413.23946125 | 4  | E   | 8  | 1232.6077509 | +0.3008184 | 1232.6077509            |            |
| -0.1868076   | 527.28238869 | 5  | N   | 7  | 1103.5651578 | -0.0136441 | 1103.5651578            |            |
| +0.2398095   | 640.36645267 | 6  | I   | 6  | 989.52223035 | +0.0175035 | 989.52223035            |            |
|              | 803.42978121 | 7  | Y   | 5  | 876.43816637 | +0.0189259 | 876.43816637            |            |
|              | 904.47745969 | 8  | T   | 4  | 713.37483783 | +0.045084  | 713.37483783            |            |
|              | 1051.5458736 | 9  | F   | 3  | 612.32715935 | +0.0107923 | 612.32715935            |            |
| +0.1188668   | 1198.6142875 | 10 | F   | 2  | 465.25874544 | -0.0552542 | 465.25874544            |            |
| -0.3236122   | 1361.6776161 | 11 | Y   | 1  | 318.19033152 | +0.1315374 | 318.19033152            |            |
|              |              | 12 | K   | 0  | 155.12700298 |            | 155.12700298            |            |

Source: 20120510\_VR\_Bsu\_TripleSILACrep1\_T1L1T2\_OG\_F07  
 Scannumber: 13571  
 Protein: BSU38710; yxIA  
 Peptide Score: 87.57  
 Method: ITMS; CID; 3

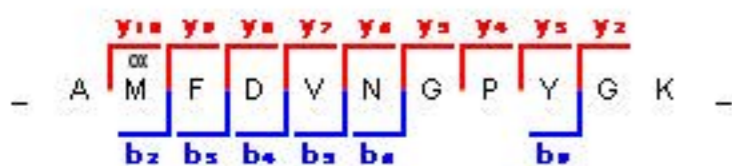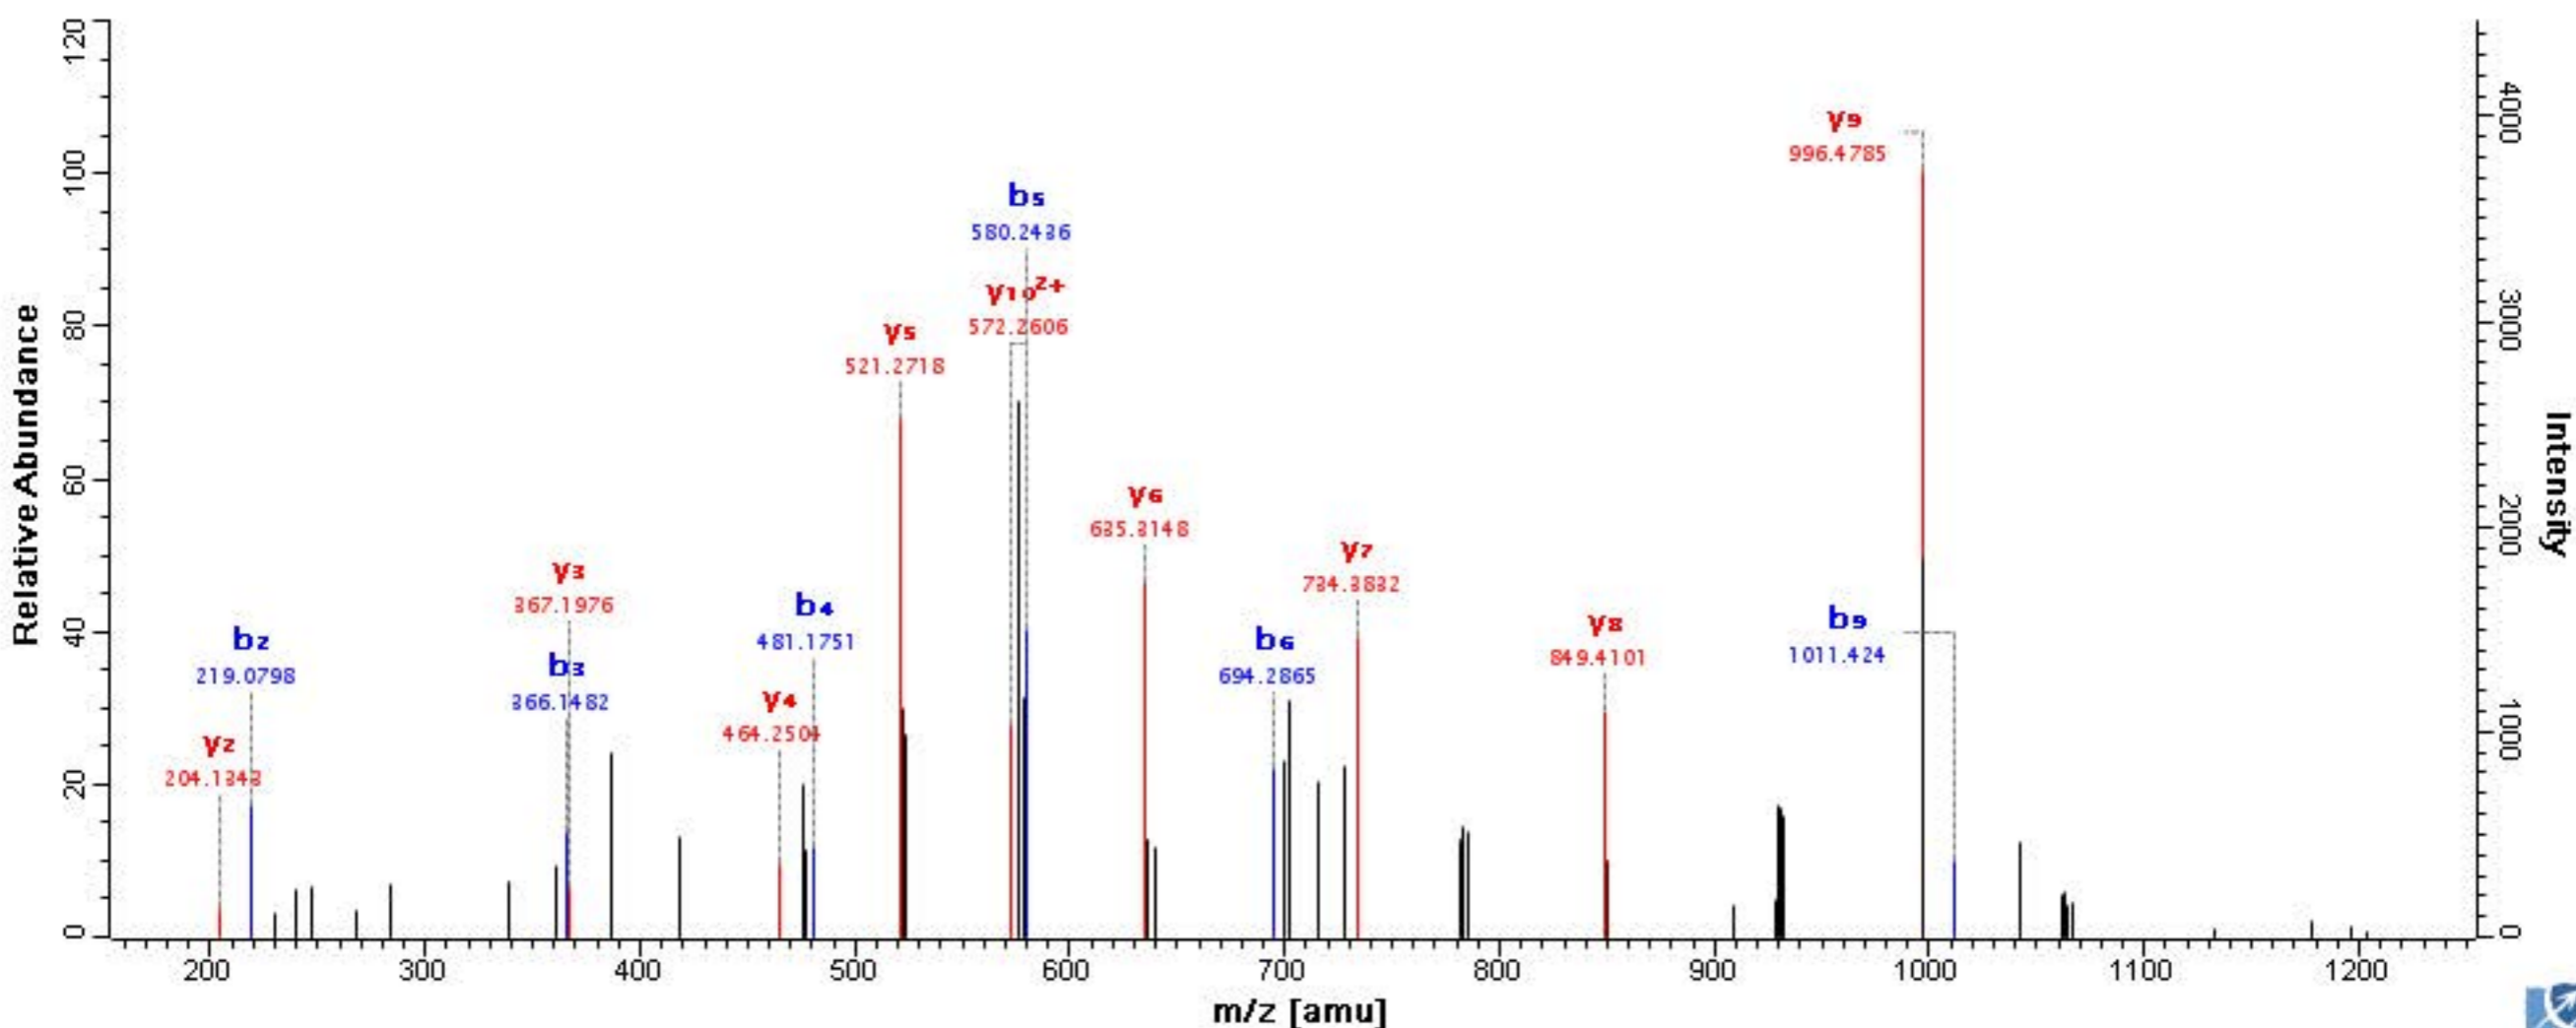

#### precursor information

|                   |                     |
|-------------------|---------------------|
| Mass:             | 1213.54377          |
| m/z:              | System.Collections. |
| Charge:           | System.Collections. |
| Retentiontime:    | System.Collections. |
| Score:            | 87.56791            |
| Mass Error [ppm]: | 0.010637            |
| PEP:              | 0.0041242           |
| Precursor Type:   | ISO                 |

#### general information

|                       |             |
|-----------------------|-------------|
| Annotation:           | 9 of 11     |
| AminoAcids Coverag    | 82 %        |
| Intensity Coverage:   | 43 %        |
| Protein Localisation: | 375 ... 385 |

| b ion           |              |    |     |    | $\gamma$ ion    |            | $\gamma^{2+}$ ion |            |
|-----------------|--------------|----|-----|----|-----------------|------------|-------------------|------------|
| $\Delta$ dalton | mass         |    | seq |    | $\Delta$ dalton | mass       | $\Delta$ dalton   | mass       |
|                 | 72.044390254 | 1  | A   | 10 |                 |            |                   |            |
| -0.1020368      | 219.07978948 | 2  | M   | 9  | 1143.5139215    |            | 572.26059901      | +0.1722013 |
| +0.0291037      | 366.1482034  | 3  | F   | 8  | 996.47852232    | -0.0353461 | 996.47852232      |            |
| -0.0121826      | 481.17514643 | 4  | D   | 7  | 849.4101084     | +0.0178091 | 849.4101084       |            |
| -0.022552       | 580.24356035 | 5  | V   | 6  | 734.38316537    | +0.0647716 | 734.38316537      |            |
| +0.1551016      | 694.28648779 | 6  | N   | 5  | 635.31475146    | -0.0152519 | 635.31475146      |            |
|                 | 751.30795152 | 7  | G   | 4  | 521.27182401    | +0.1364402 | 521.27182401      |            |
|                 | 848.36071537 | 8  | P   | 3  | 464.25036028    | +0.1005919 | 464.25036028      |            |
| +0.2346475      | 1011.4240439 | 9  | Y   | 2  | 367.19759643    | -0.0444592 | 367.19759643      |            |
|                 | 1068.4455076 | 10 | G   | 1  | 204.13426789    | +0.0039157 | 204.13426789      |            |
|                 |              | 11 | K   | 0  | 147.11280417    |            | 147.11280417      |            |

Source: 20120510\_VR\_Bsu\_TripleSILACrep1\_T1L1T2\_OG\_F07  
 Scannumber: 18374  
 Protein: BSU03240; ycgQ  
 Peptide Score: 115.29  
 Method: ITMS; CID; 3

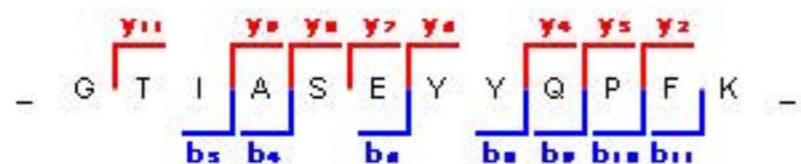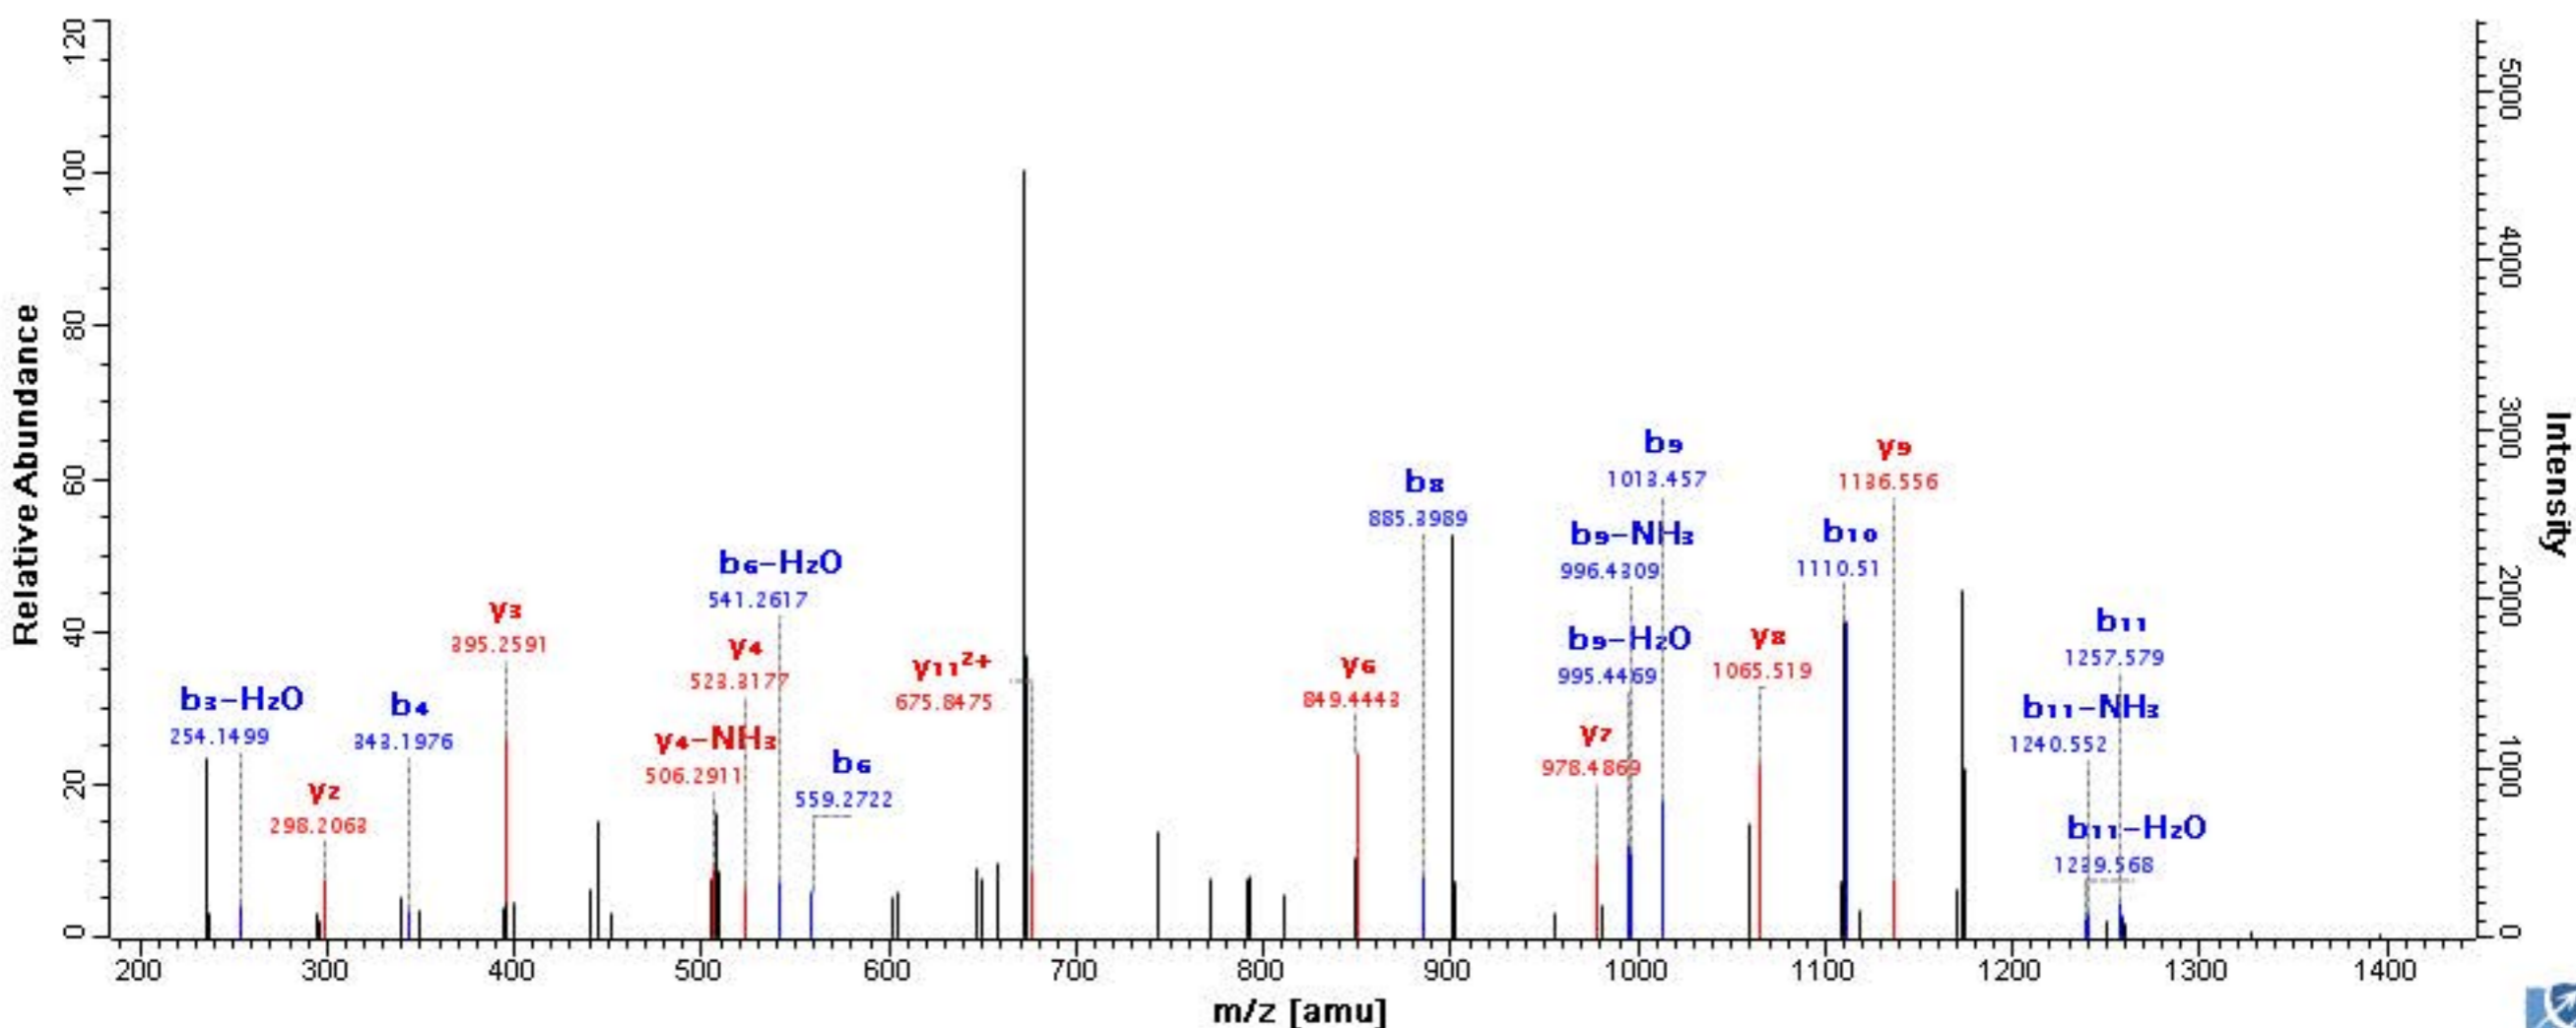

#### precursor information

|                   |                     |
|-------------------|---------------------|
| Mass:             | 1402.67727          |
| m/z:              | System.Collections. |
| Charge:           | System.Collections. |
| Retentiontime:    | System.Collections. |
| Score:            | 115.2865            |
| Mass Error [ppm]: | 0.27378             |
| PEP:              | 0.00031945          |
| Precursor Type:   | MULTI               |

#### general information

|                       |             |
|-----------------------|-------------|
| Annotation:           | 10 of 12    |
| AminoAcids Coverage:  | 83 %        |
| Intensity Coverage:   | 29 %        |
| Protein Localisation: | 248 ... 259 |

| b ion      |              |    |     |    | y ion        |            |              | y <sup>2+</sup> ion |  |
|------------|--------------|----|-----|----|--------------|------------|--------------|---------------------|--|
| Δ dalton   | mass         |    | seq |    | Δ dalton     | mass       | Δ dalton     | mass                |  |
|            | 58.02874019  | 1  | G   | 11 |              |            |              |                     |  |
|            | 159.07641866 | 2  | T   | 10 | 1350.6878013 |            | 675.84753886 | +0.3040114          |  |
|            | 272.16048264 | 3  | I   | 9  | 1249.6401228 |            | 1249.6401228 |                     |  |
| -0.0279492 | 343.19759643 | 4  | A   | 8  | 1136.5560588 | -0.1280803 | 1136.5560588 |                     |  |
|            | 430.22962484 | 5  | S   | 7  | 1065.518945  | -0.0177243 | 1065.518945  |                     |  |
| -0.317445  | 559.27221794 | 6  | E   | 6  | 978.48691661 | +0.000266  | 978.48691661 |                     |  |
|            | 722.33554648 | 7  | Y   | 5  | 849.44432351 | +0.1724978 | 849.44432351 |                     |  |
| +0.023061  | 885.39887502 | 8  | Y   | 4  | 686.38099497 |            | 686.38099497 |                     |  |
| +0.0220397 | 1013.4574525 | 9  | Q   | 3  | 523.31766643 | -0.0068144 | 523.31766643 |                     |  |
| +0.1667856 | 1110.5102164 | 10 | P   | 2  | 395.25908892 | -0.0223946 | 395.25908892 |                     |  |
| +0.2792799 | 1257.5786303 | 11 | F   | 1  | 298.20632507 | -0.0400348 | 298.20632507 |                     |  |
|            |              | 12 | K   | 0  | 151.13791115 |            | 151.13791115 |                     |  |

Source: 20120510\_VR\_Bsu\_TripleSILACrep1\_T1L1 T2\_OG\_F07  
 Scannumber: 20891  
 Protein: BSU08730; perR; ygaG  
 Peptide Score: 47.33  
 Method: ITMS; CID; 3

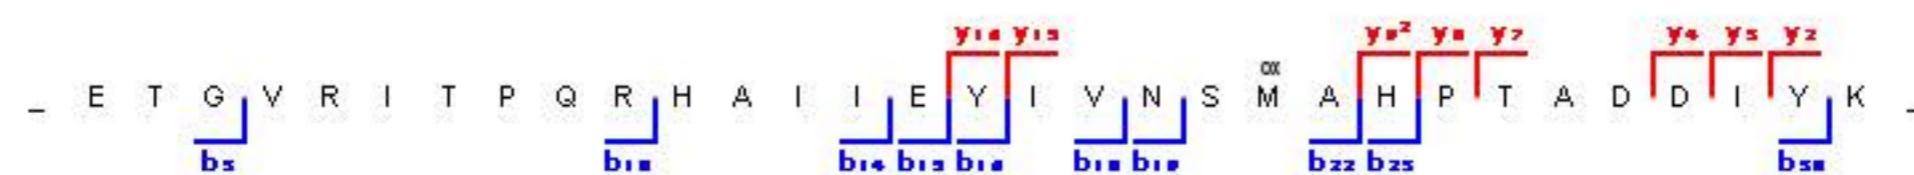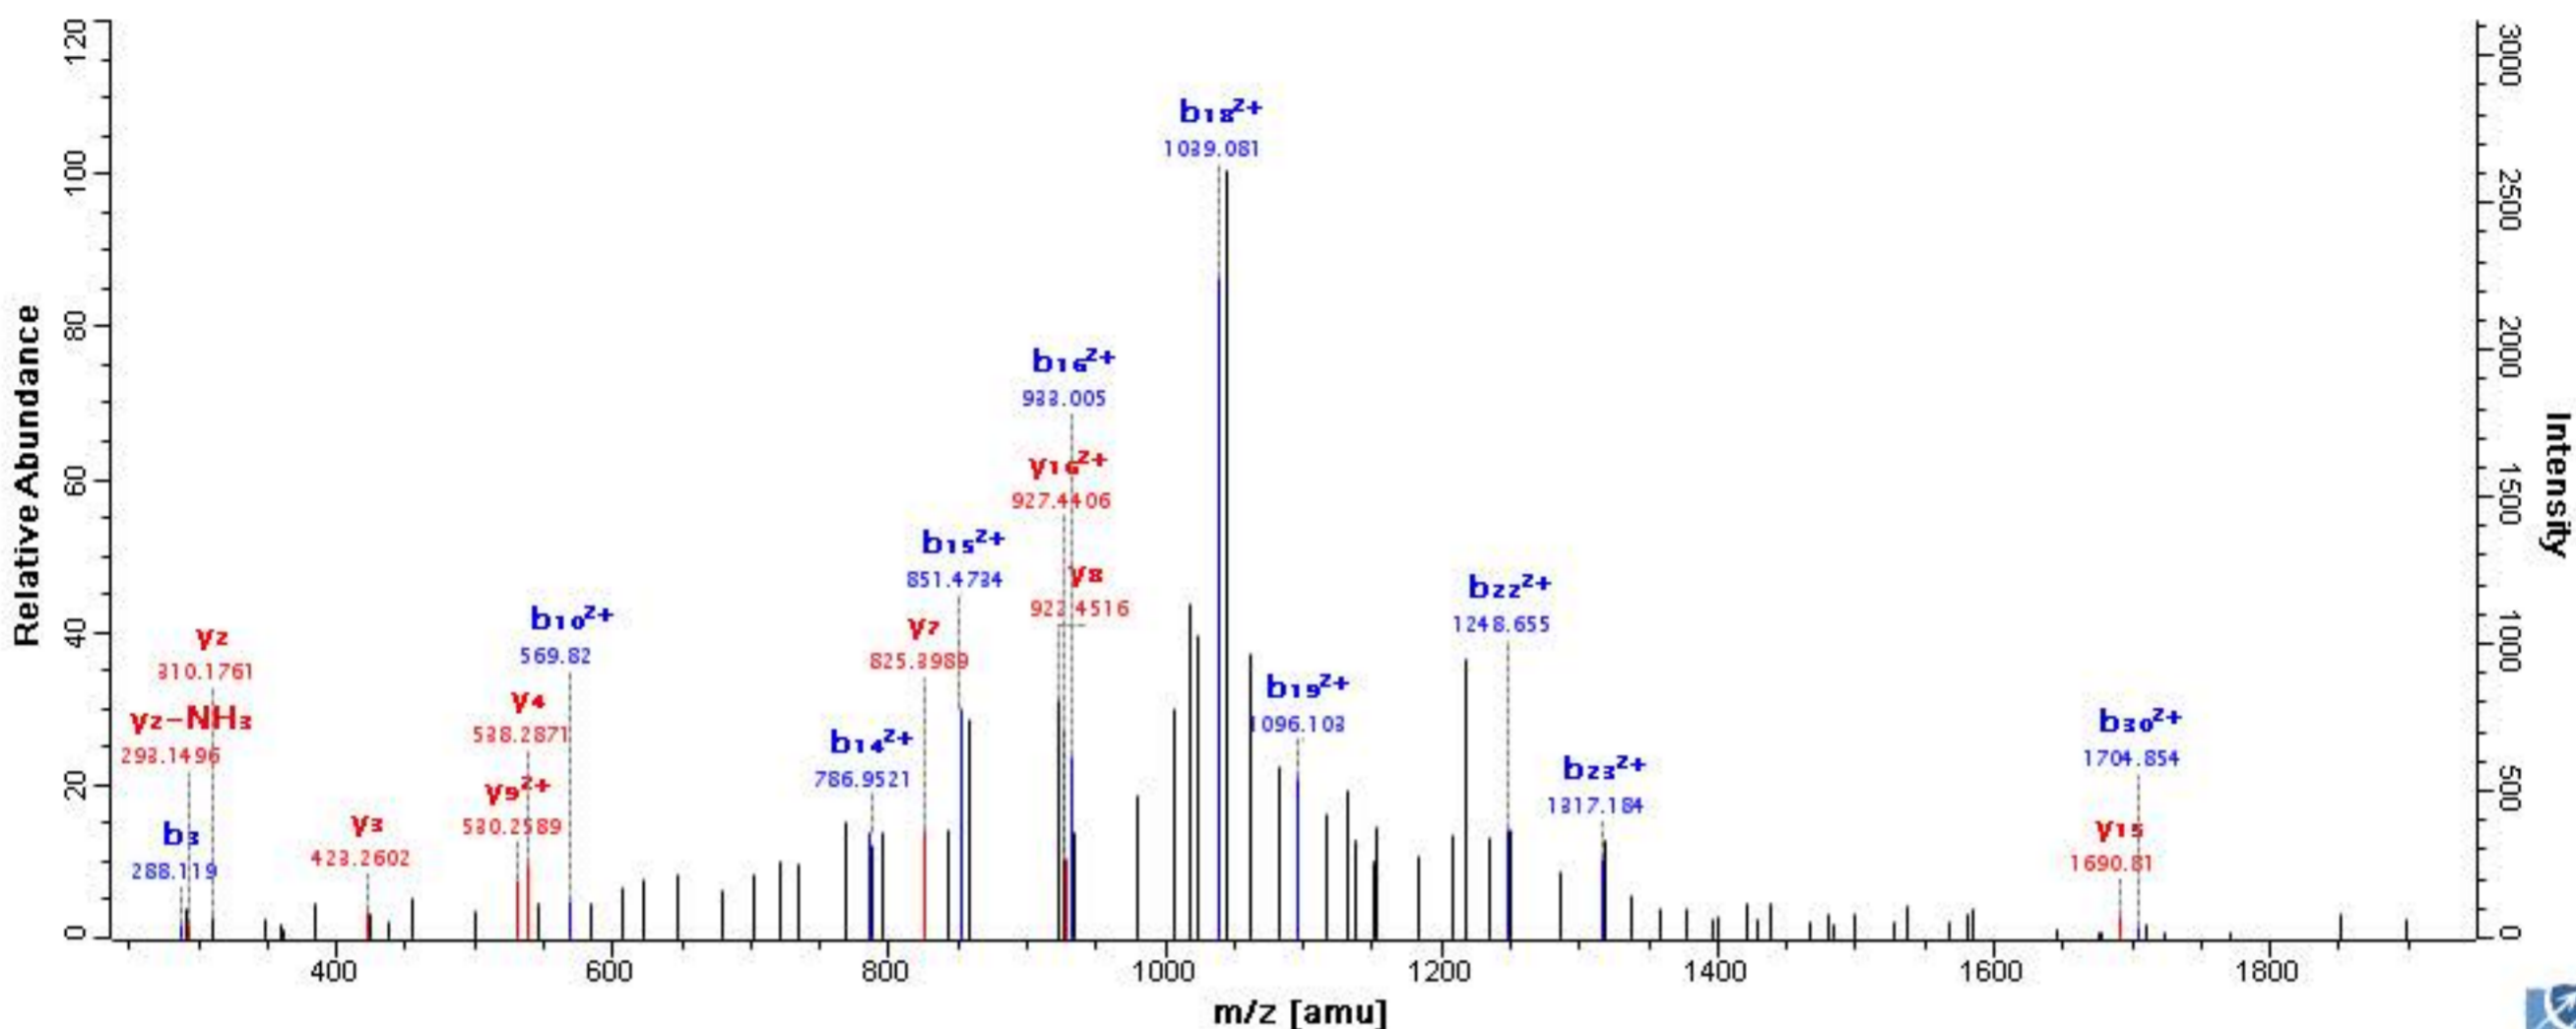

#### precursor information

|                   |                     |
|-------------------|---------------------|
| Mass:             | 3553.80044          |
| m/z:              | System.Collections. |
| Charge:           | System.Collections. |
| Retentiontime:    | System.Collections. |
| Score:            | 47.33092            |
| Mass Error [ppm]: | 0.47382             |
| PEP:              | 8.4421E-05          |
| Precursor Type:   | MULTI               |

| b <sup>2+</sup> ion |          | b ion     |          |     | y ion |          | y <sup>2+</sup> ion |          |                   |
|---------------------|----------|-----------|----------|-----|-------|----------|---------------------|----------|-------------------|
| Δ dalton            | mass     | Δ dalton  | mass     | seq |       | Δ dalton | mass                | Δ dalton | mass              |
|                     | 130.0499 |           | 130.0499 | 1   | E     | 30       |                     |          |                   |
|                     | 231.0975 |           | 231.0975 | 2   | T     | 29       | 3425.763            |          | 3425.763          |
|                     | 288.119  | -0.043084 | 288.119  | 3   | G     | 28       | 3324.716            |          | 3324.716          |
|                     | 387.1874 |           | 387.1874 | 4   | V     | 27       | 3267.694            |          | 3267.694          |
|                     | 543.2885 |           | 543.2885 | 5   | R     | 26       | 3168.626            |          | 3168.626          |
|                     | 656.3726 |           | 656.3726 | 6   | I     | 25       | 3012.525            |          | 3012.525          |
|                     | 757.4203 |           | 757.4203 | 7   | T     | 24       | 2899.441            |          | 2899.441          |
|                     | 854.473  |           | 854.473  | 8   | P     | 23       | 2798.393            |          | 2798.393          |
|                     | 982.5316 |           | 982.5316 | 9   | Q     | 22       | 2701.34             |          | 2701.34           |
| -0.017148           | 569.82   |           | 1138.633 | 10  | R     | 21       | 2573.282            |          | 2573.282          |
|                     | 1275.692 |           | 1275.692 | 11  | H     | 20       | 2417.181            |          | 2417.181          |
|                     | 1346.729 |           | 1346.729 | 12  | A     | 19       | 2280.122            |          | 2280.122          |
|                     | 1459.813 |           | 1459.813 | 13  | I     | 18       | 2209.085            |          | 2209.085          |
| -0.273919           | 786.9521 |           | 1572.897 | 14  | I     | 17       | 2096                |          | 2096              |
| +0.281322           | 851.4734 |           | 1701.939 | 15  | E     | 16       | 1982.916            |          | 1982.916          |
| -0.42771            | 933.005  |           | 1865.003 | 16  | Y     | 15       | 1853.874            |          | 927.4406 +0.28003 |
|                     | 1978.087 |           | 1978.087 | 17  | I     | 14       | 1690.81 +0.159107   |          | 1690.81           |
| +0.316669           | 1039.081 |           | 2077.155 | 18  | V     | 13       | 1577.726            |          | 1577.726          |
| +0.297646           | 1096.103 |           | 2191.198 | 19  | N     | 12       | 1478.658            |          | 1478.658          |
|                     | 2278.23  |           | 2278.23  | 20  | S     | 11       | 1364.615            |          | 1364.615          |
|                     | 2425.266 |           | 2425.266 | 21  | M     | 10       | 1277.583            |          | 1277.583          |
| +0.140517           | 1248.655 |           | 2496.303 | 22  | A     | 9        | 1130.548            |          | 1130.548          |
| +0.133888           | 1317.184 |           | 2633.362 | 23  | H     | 8        | 1059.511            |          | 530.2589 -0.07355 |
|                     | 2730.414 |           | 2730.414 | 24  | P     | 7        | 922.4516 -0.038431  |          | 922.4516          |
|                     | 2831.462 |           | 2831.462 | 25  | T     | 6        | 825.3989 +0.266591  |          | 825.3989          |
|                     | 2902.499 |           | 2902.499 | 26  | A     | 5        | 724.3512            |          | 724.3512          |
|                     | 3017.526 |           | 3017.526 | 27  | D     | 4        | 653.3141            |          | 653.3141          |
|                     | 3132.553 |           | 3132.553 | 28  | D     | 3        | 538.2871 +0.082428  |          | 538.2871          |
|                     | 3245.637 |           | 3245.637 | 29  | I     | 2        | 423.2602 +0.030575  |          | 423.2602          |
| +0.142083           | 1704.854 |           | 3408.701 | 30  | Y     | 1        | 310.1761 -0.000351  |          | 310.1761          |
|                     |          |           |          | 31  | K     | 0        | 147.1128            |          | 147.1128          |

#### general information

|                       |           |
|-----------------------|-----------|
| Annotation:           | 15 of 31  |
| AminoAcids Coverage:  | 48 %      |
| Intensity Coverage:   | 26 %      |
| Protein Localisation: | 15 ... 45 |

Source: 20120510\_VR\_Bsu\_TripleSILACrep1\_T1L1T2\_OG\_F07  
 Scannumber: 24039  
 Protein: BSU03220; ycgO  
 Peptide Score: 57.5  
 Method: ITMS; CID; 3

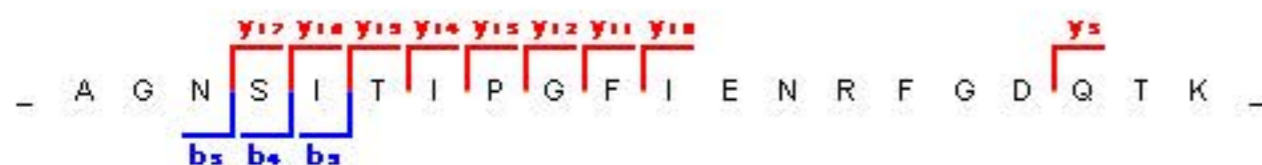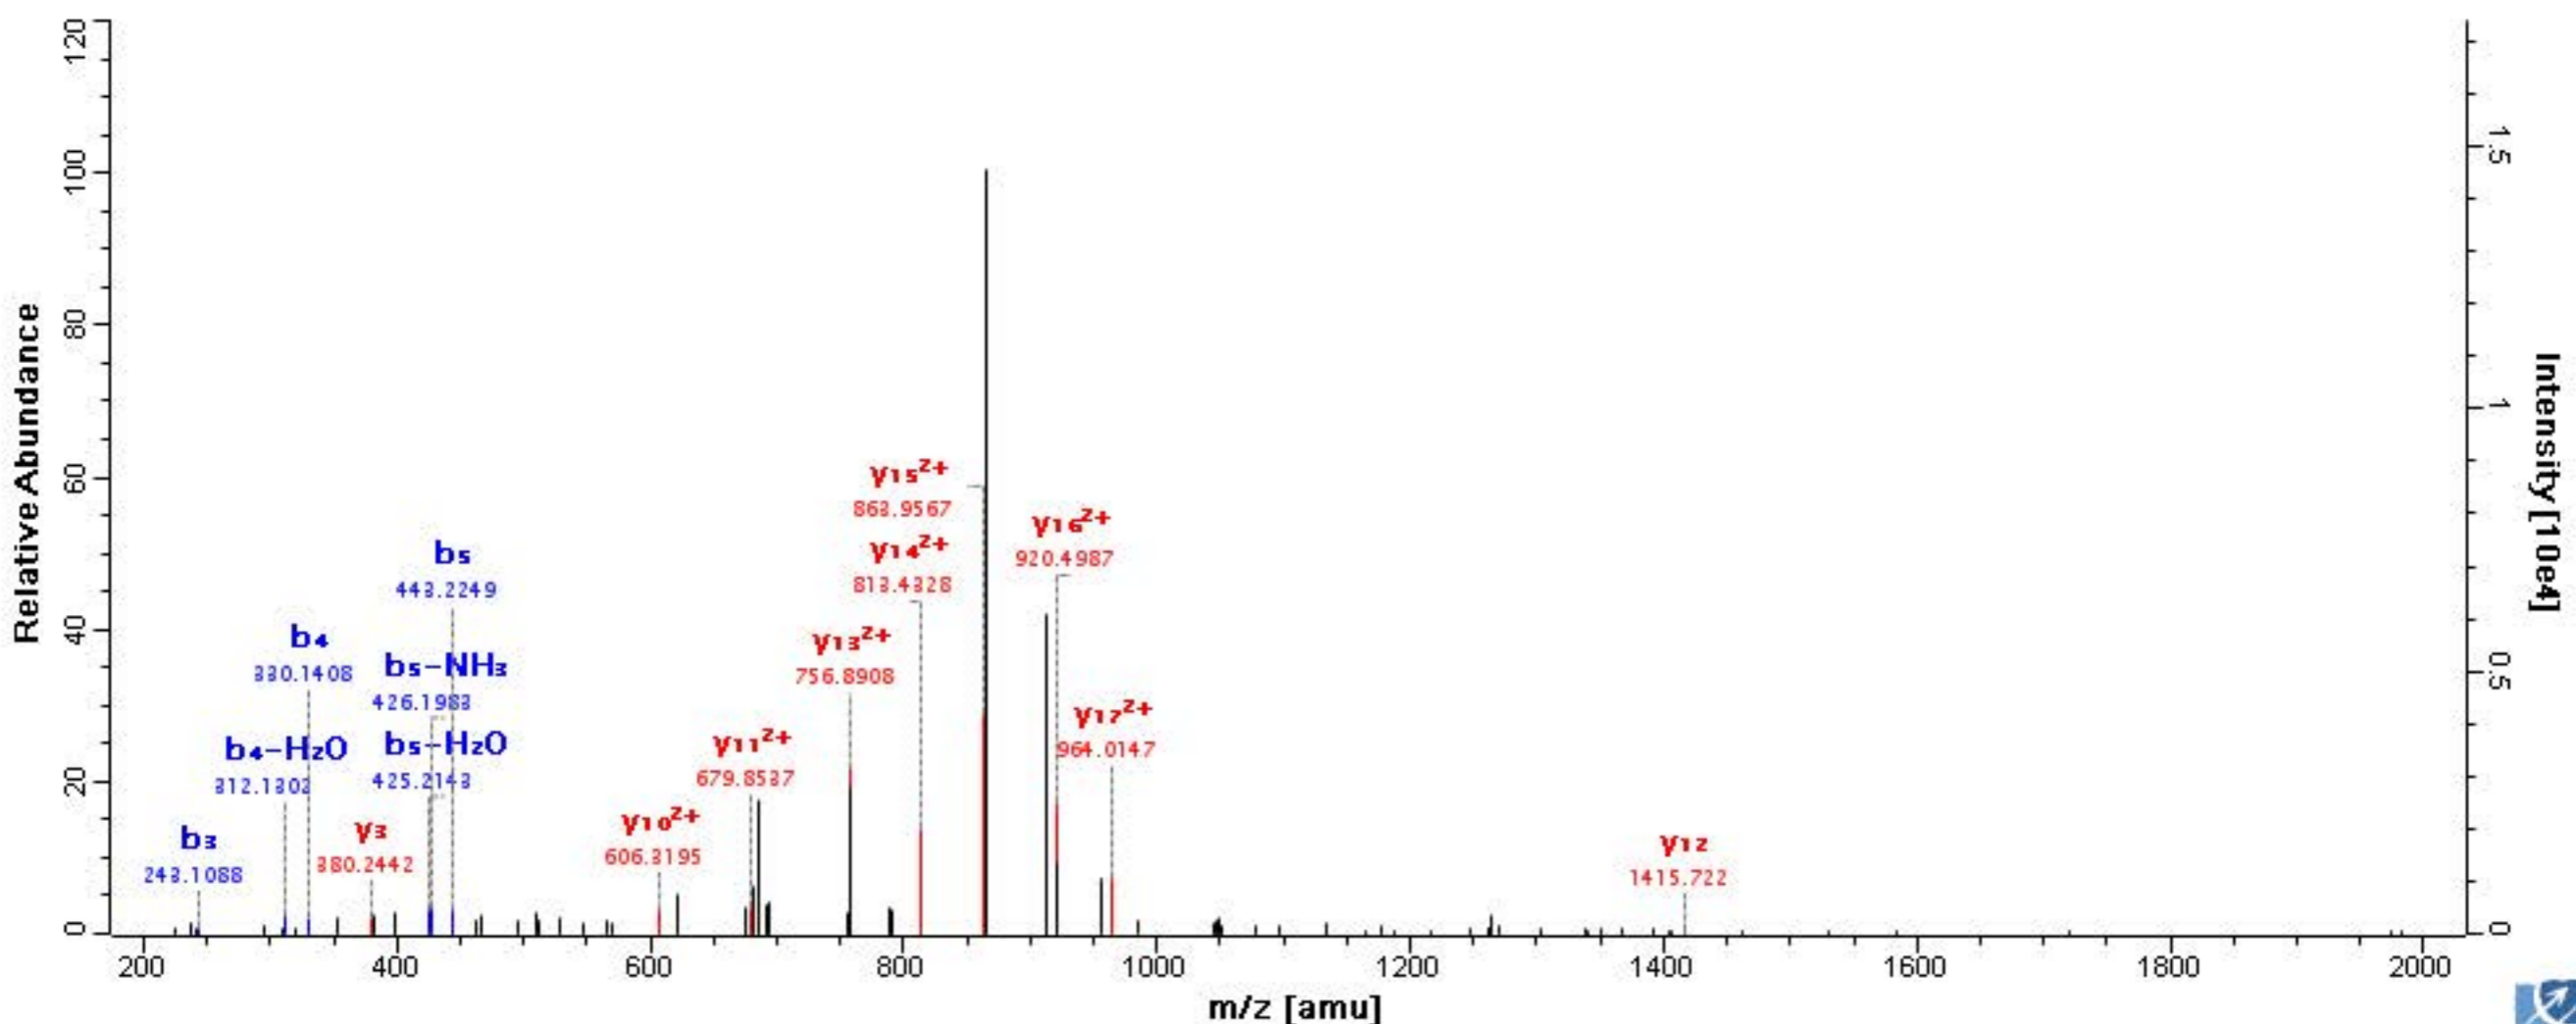

**precursor information**

|                   |                     |
|-------------------|---------------------|
| Mass:             | 2164.09133          |
| m/z:              | System.Collections. |
| Charge:           | System.Collections. |
| Retentiontime:    | System.Collections. |
| Score:            | 57.49924            |
| Mass Error [ppm]: | 0.021906            |
| PEP:              | 0.0017846           |
| Precursor Type:   | MULTI               |

| b ion      |              |    |     |    | y ion        |            | y <sup>2+</sup> ion |            |
|------------|--------------|----|-----|----|--------------|------------|---------------------|------------|
| Δ dalton   | mass         |    | seq |    | Δ dalton     | mass       | Δ dalton            | mass       |
|            | 72.044390254 | 1  | A   | 19 |              |            |                     |            |
|            | 129.06585398 | 2  | G   | 18 | 2098.0865509 |            | 2098.0865509        |            |
| +0.0591721 | 243.10878143 | 3  | N   | 17 | 2041.0650871 |            | 2041.0650871        |            |
| +0.1115705 | 330.14080984 | 4  | S   | 16 | 1927.0221597 |            | 964.01471808        | +0.334464  |
| +0.0059611 | 443.22487382 | 5  | I   | 15 | 1839.9901313 |            | 920.49870388        | +0.0255271 |
|            | 544.27255229 | 6  | T   | 14 | 1726.9060673 |            | 863.95667189        | -0.1966621 |
|            | 657.35661627 | 7  | I   | 13 | 1625.8583888 |            | 813.43283265        | +0.4742718 |
|            | 754.40938012 | 8  | P   | 12 | 1512.7743249 |            | 756.89080066        | -0.170891  |
|            | 811.43084385 | 9  | G   | 11 | 1415.721561  | +0.1802945 | 1415.721561         |            |
|            | 958.49925776 | 10 | F   | 10 | 1358.7000973 |            | 679.85368687        | +0.4303097 |
|            | 1071.5833217 | 11 | I   | 9  | 1211.6316834 |            | 606.31947992        | +0.4542017 |
|            | 1200.6259148 | 12 | E   | 8  | 1098.5476194 |            | 1098.5476194        |            |
|            | 1314.6688423 | 13 | N   | 7  | 969.50502629 |            | 969.50502629        |            |
|            | 1470.7699533 | 14 | R   | 6  | 855.46209884 |            | 855.46209884        |            |
|            | 1617.8383672 | 15 | F   | 5  | 699.36098781 |            | 699.36098781        |            |
|            | 1674.859831  | 16 | G   | 4  | 552.2925739  |            | 552.2925739         |            |
|            | 1789.886774  | 17 | D   | 3  | 495.27111017 |            | 495.27111017        |            |
|            | 1917.9453515 | 18 | Q   | 2  | 380.24416714 | +0.0056498 | 380.24416714        |            |
|            | 2018.99303   | 19 | T   | 1  | 252.18558963 |            | 252.18558963        |            |
|            |              | 20 | K   | 0  | 151.13791115 |            | 151.13791115        |            |

**general information**

|                       |            |
|-----------------------|------------|
| Annotation:           | 10 of 20   |
| AminoAcids Coverage:  | 50 %       |
| Intensity Coverage:   | 27 %       |
| Protein Localisation: | 87 ... 106 |

Source: 20120510\_VR\_Bsu\_TripleSILACrep1\_T1L1T2\_OG\_F07  
 Scannumber: 25894  
 Protein: BSU29920; ytmP  
 Peptide Score: 93.84  
 Method: ITMS; CID; 3

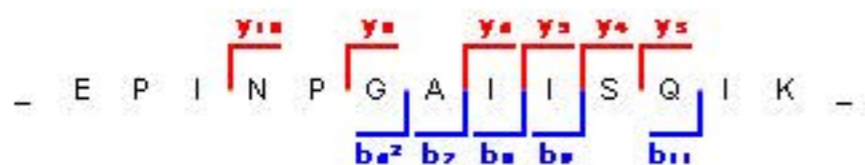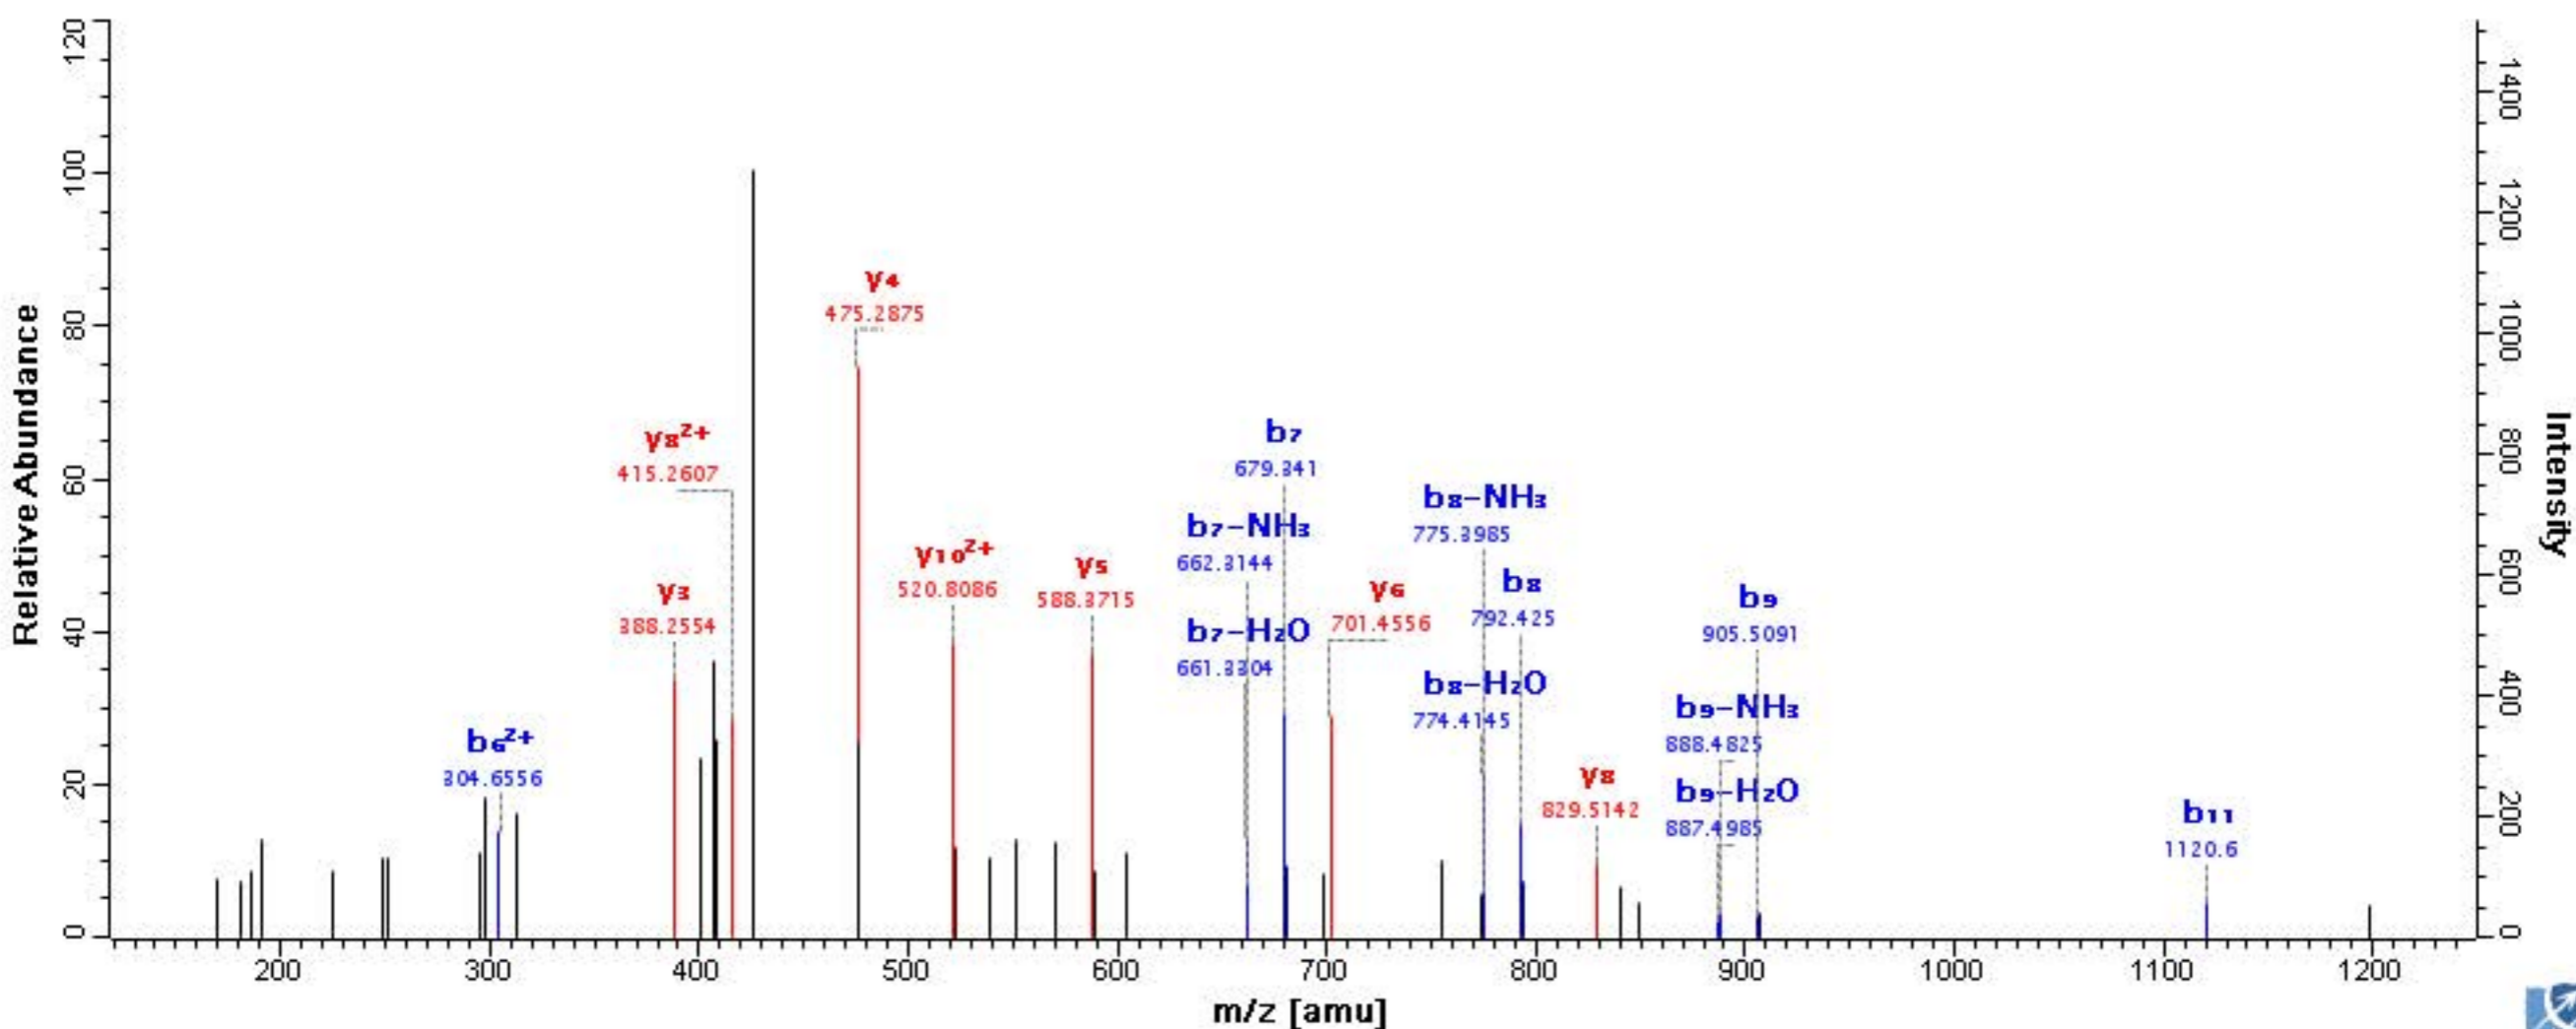

#### precursor information

|                   |                     |
|-------------------|---------------------|
| Mass:             | 1378.7828           |
| m/z:              | System.Collections. |
| Charge:           | System.Collections. |
| Retentiontime:    | System.Collections. |
| Score:            | 93.83924            |
| Mass Error [ppm]: | 0.56946             |
| PEP:              | 0.00074333          |
| Precursor Type:   | MULTI               |

#### general information

|                       |           |
|-----------------------|-----------|
| Annotation:           | 7 of 13   |
| AminoAcids Coverag    | 54 %      |
| Intensity Coverage:   | 45 %      |
| Protein Localisation: | 51 ... 63 |

| b <sup>2+</sup> ion |          | b ion     |          |     | y ion |          | y <sup>2+</sup> ion |           |           |           |
|---------------------|----------|-----------|----------|-----|-------|----------|---------------------|-----------|-----------|-----------|
| Δ dalton            | mass     | Δ dalton  | mass     | seq |       | Δ dalton | mass                | Δ dalton  | mass      |           |
|                     | 130.0499 |           | 130.0499 | 1   | E     | 12       |                     |           |           |           |
|                     | 227.1026 |           | 227.1026 | 2   | P     | 11       | 1250.747            | 1250.747  |           |           |
|                     | 340.1867 |           | 340.1867 | 3   | I     | 10       | 1153.694            | 1153.694  |           |           |
|                     | 454.2296 |           | 454.2296 | 4   | N     | 9        | 1040.61             | 520.8086  | +0.063314 |           |
|                     | 551.2824 |           | 551.2824 | 5   | P     | 8        | 926.5669            | 926.5669  |           |           |
| -0.361924           | 304.6556 |           | 608.3039 | 6   | G     | 7        | 829.5142            | +0.157024 | 415.2607  | +0.123305 |
|                     | 679.341  | +0.242347 | 679.341  | 7   | A     | 6        | 772.4927            |           | 772.4927  |           |
|                     | 792.425  | +0.178058 | 792.425  | 8   | I     | 5        | 701.4556            | +0.26919  | 701.4556  |           |
|                     | 905.5091 | +0.460388 | 905.5091 | 9   | I     | 4        | 588.3715            | +0.082014 | 588.3715  |           |
|                     | 992.5411 |           | 992.5411 | 10  | S     | 3        | 475.2875            | +0.214357 | 475.2875  |           |
|                     | 1120.6   | +0.011506 | 1120.6   | 11  | Q     | 2        | 388.2554            | -0.190077 | 388.2554  |           |
|                     | 1233.684 |           | 1233.684 | 12  | I     | 1        | 260.1969            |           | 260.1969  |           |
|                     |          |           |          | 13  | K     | 0        | 147.1128            |           | 147.1128  |           |



Source: 20120510\_VR\_Bsu\_TripleSILACrep1\_T1L1T2\_OG\_F08  
 Scannumber: 14154  
 Protein: BSU30770; mntA; ytgA  
 Peptide Score: 110.8  
 Method: ITMS; CID; 3

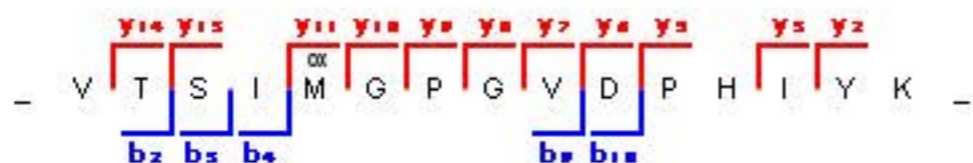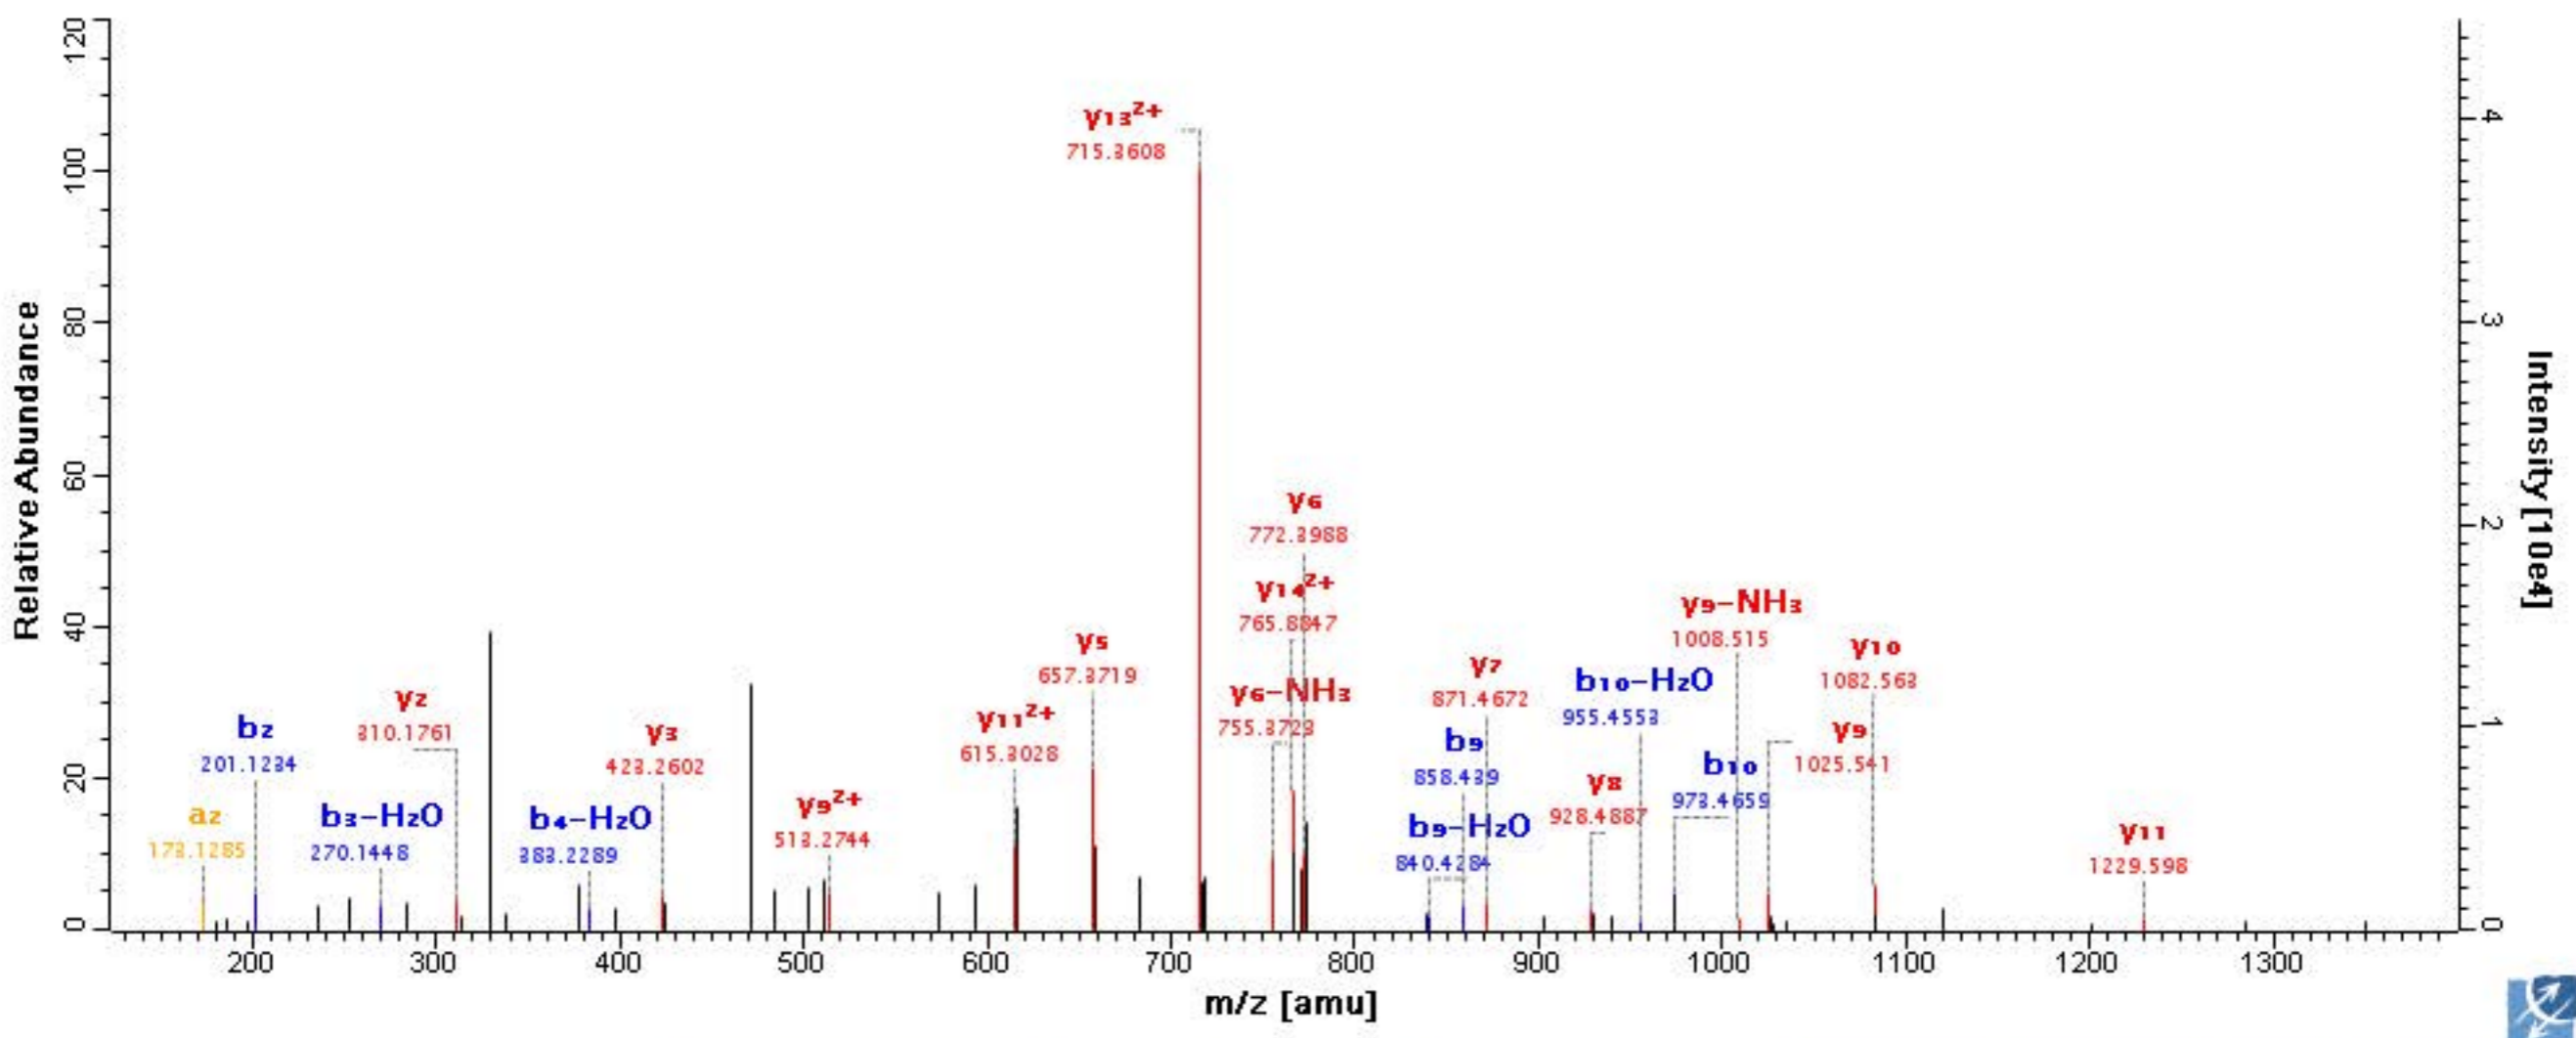

**precursor information**

|                   |                     |
|-------------------|---------------------|
| Mass:             | 0                   |
| m/z:              | System.Collections. |
| Charge:           | System.Collections. |
| Retentiontime:    | System.Collections. |
| Score:            | 110.8011            |
| Mass Error [ppm]: | 0.091146            |
| PEP:              | 1.5136E-12          |
| Precursor Type:   | PEAK                |

**general information**

|                       |           |
|-----------------------|-----------|
| Annotation:           | 12 of 15  |
| AminoAcids Coverag    | 80 %      |
| Intensity Coverage:   | 49 %      |
| Protein Localisation: | 55 ... 69 |

| a ion     |          | b ion     |          |    |     |    | y ion    |           | y <sup>2+</sup> ion |           |
|-----------|----------|-----------|----------|----|-----|----|----------|-----------|---------------------|-----------|
| Δ dalton  | mass     | Δ dalton  | mass     |    | seq |    | Δ dalton | mass      | Δ dalton            | mass      |
|           | 72.08078 |           | 100.0757 | 1  | V   | 14 |          |           |                     |           |
| +0.304789 | 173.1285 | +0.151472 | 201.1234 | 2  | T   | 13 | 1530.762 |           | 765.8847            | +0.145956 |
|           | 260.1605 |           | 288.1554 | 3  | S   | 12 | 1429.714 |           | 715.3608            | +0.264949 |
|           | 373.2445 |           | 401.2395 | 4  | I   | 11 | 1342.682 |           | 1342.682            |           |
|           | 520.2799 |           | 548.2749 | 5  | M   | 10 | 1229.598 | -0.146416 | 615.3028            | -0.099246 |
|           | 577.3014 |           | 605.2963 | 6  | G   | 9  | 1082.563 | +0.175727 | 1082.563            |           |
|           | 674.3542 |           | 702.3491 | 7  | P   | 8  | 1025.541 | +0.090745 | 513.2744            | -0.054518 |
|           | 731.3756 |           | 759.3706 | 8  | G   | 7  | 928.4887 | +0.13588  | 928.4887            |           |
|           | 830.4441 | +0.220336 | 858.439  | 9  | V   | 6  | 871.4672 | +0.235468 | 871.4672            |           |
|           | 945.471  | -0.021085 | 973.4659 | 10 | D   | 5  | 772.3988 | +0.200977 | 772.3988            |           |
|           | 1042.524 |           | 1070.519 | 11 | P   | 4  | 657.3719 | +0.072341 | 657.3719            |           |
|           | 1179.583 |           | 1207.578 | 12 | H   | 3  | 560.3191 |           | 560.3191            |           |
|           | 1292.667 |           | 1320.662 | 13 | I   | 2  | 423.2602 | -0.086857 | 423.2602            |           |
|           | 1455.73  |           | 1483.725 | 14 | Y   | 1  | 310.1761 | +0.066726 | 310.1761            |           |
|           |          |           |          | 15 | K   | 0  | 147.1128 |           | 147.1128            |           |

Source: 20120510\_VR\_Bsu\_TripleSILACrep1\_T1L1 T2\_OG\_FD8  
 Scannumber: 24308  
 Protein: BSU39540; LP9A; yxel  
 Peptide Score: 63.27  
 Method: ITMS; CID; 3

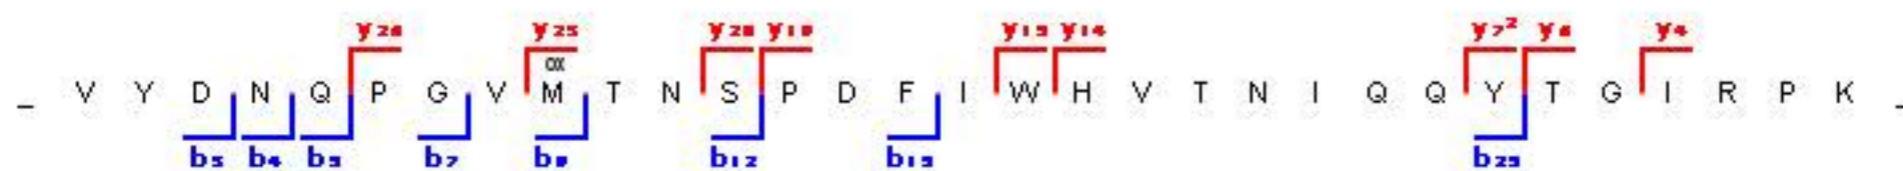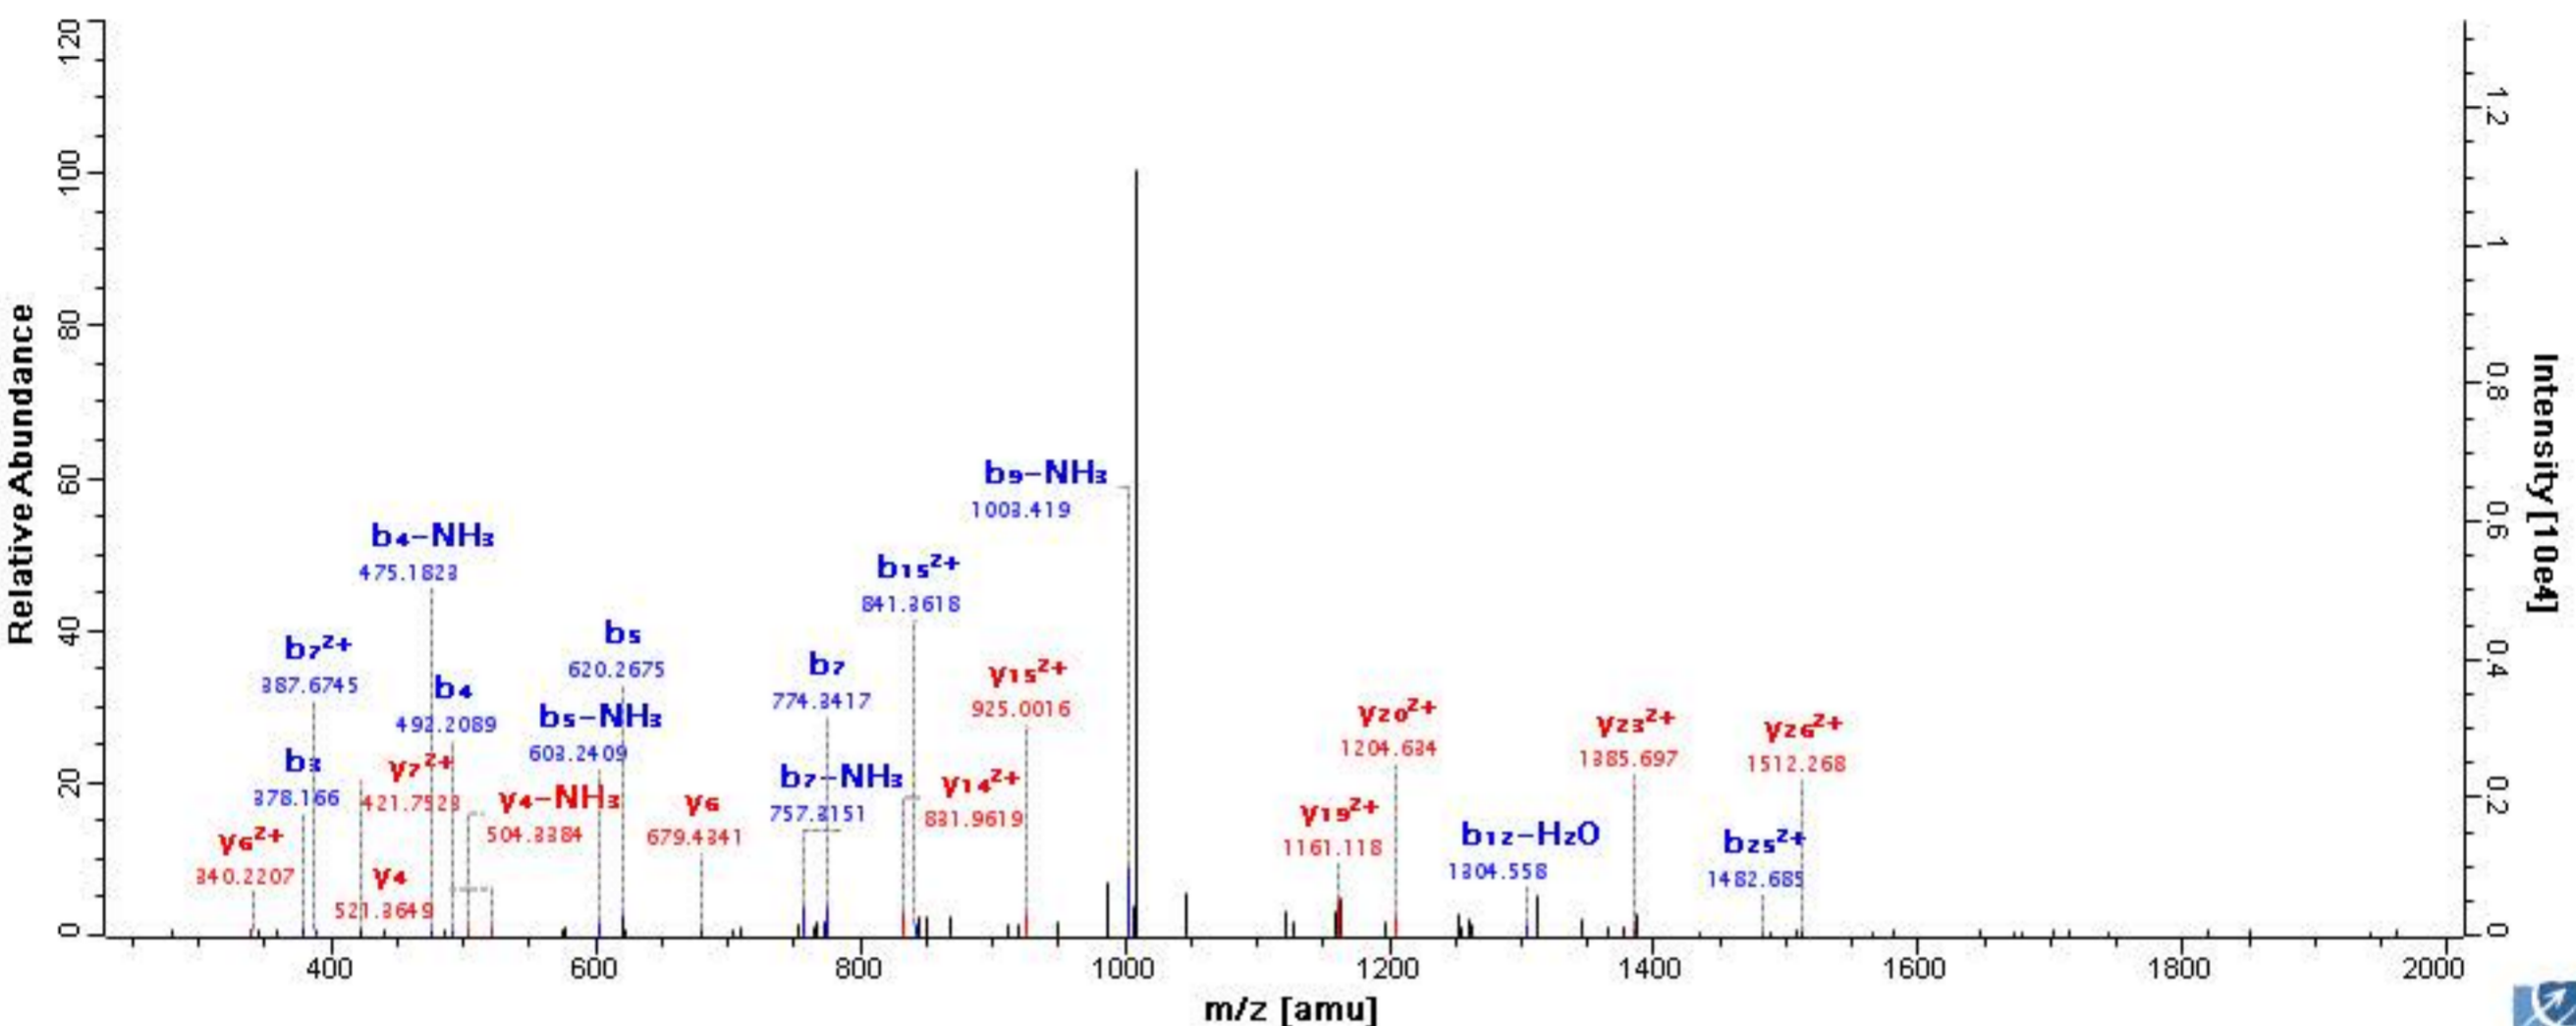

#### precursor information

|                   |                     |
|-------------------|---------------------|
| Mass:             | 3641.78402          |
| m/z:              | System.Collections. |
| Charge:           | System.Collections. |
| Retentiontime:    | System.Collections. |
| Score:            | 63.27224            |
| Mass Error [ppm]: | 0.6497              |
| PEP:              | 3.5367E-06          |
| Precursor Type:   | ISO                 |

| b <sup>2+</sup> ion |          | b ion     |          |     | y ion |          | y <sup>2+</sup> ion |          |           |
|---------------------|----------|-----------|----------|-----|-------|----------|---------------------|----------|-----------|
| Δ dalton            | mass     | Δ dalton  | mass     | seq |       | Δ dalton | mass                | Δ dalton | mass      |
|                     | 100.0757 |           | 100.0757 | 1   | V     | 30       |                     |          |           |
|                     | 263.139  |           | 263.139  | 2   | Y     | 29       | 3543.721            | 3543.721 |           |
|                     | 378.166  | +0.075585 | 378.166  | 3   | D     | 28       | 3380.657            | 3380.657 |           |
|                     | 492.2089 | +0.101352 | 492.2089 | 4   | N     | 27       | 3265.63             | 3265.63  |           |
|                     | 620.2675 | +0.041432 | 620.2675 | 5   | Q     | 26       | 3151.587            | 3151.587 |           |
|                     | 717.3202 |           | 717.3202 | 6   | P     | 25       | 3023.529            | 1512.268 | -0.366029 |
| +0.476149           | 387.6745 | +0.138469 | 774.3417 | 7   | G     | 24       | 2926.476            | 2926.476 |           |
|                     | 873.4101 |           | 873.4101 | 8   | V     | 23       | 2869.455            | 2869.455 |           |
|                     | 1020.446 |           | 1020.446 | 9   | M     | 22       | 2770.386            | 1385.697 | +0.089691 |
|                     | 1121.493 |           | 1121.493 | 10  | T     | 21       | 2623.351            | 2623.351 |           |
|                     | 1235.536 |           | 1235.536 | 11  | N     | 20       | 2522.303            | 2522.303 |           |
|                     | 1322.568 |           | 1322.568 | 12  | S     | 19       | 2408.26             | 1204.634 | +0.48204  |
|                     | 1419.621 |           | 1419.621 | 13  | P     | 18       | 2321.228            | 1161.118 | +0.080085 |
|                     | 1534.648 |           | 1534.648 | 14  | D     | 17       | 2224.175            | 2224.175 |           |
| +0.428636           | 841.3618 |           | 1681.716 | 15  | F     | 16       | 2109.148            | 2109.148 |           |
|                     | 1794.8   |           | 1794.8   | 16  | I     | 15       | 1962.08             | 1962.08  |           |
|                     | 1980.88  |           | 1980.88  | 17  | W     | 14       | 1848.996            | 925.0016 | +0.027904 |
|                     | 2117.939 |           | 2117.939 | 18  | H     | 13       | 1662.917            | 831.9619 | +0.284662 |
|                     | 2217.007 |           | 2217.007 | 19  | V     | 12       | 1525.858            | 1525.858 |           |
|                     | 2318.055 |           | 2318.055 | 20  | T     | 11       | 1426.789            | 1426.789 |           |
|                     | 2432.098 |           | 2432.098 | 21  | N     | 10       | 1325.742            | 1325.742 |           |
|                     | 2545.182 |           | 2545.182 | 22  | I     | 9        | 1211.699            | 1211.699 |           |
|                     | 2673.24  |           | 2673.24  | 23  | Q     | 8        | 1098.615            | 1098.615 |           |
|                     | 2801.299 |           | 2801.299 | 24  | Q     | 7        | 970.556             | 970.556  |           |
| -0.183111           | 1482.685 |           | 2964.362 | 25  | Y     | 6        | 842.4974            | 421.7523 | +0.494848 |
|                     | 3065.41  |           | 3065.41  | 26  | T     | 5        | 679.4341            | 340.2207 | -0.059731 |
|                     | 3122.431 |           | 3122.431 | 27  | G     | 4        | 578.3864            | 578.3864 |           |
|                     | 3235.515 |           | 3235.515 | 28  | I     | 3        | 521.3649            | 521.3649 | +0.060046 |
|                     | 3391.616 |           | 3391.616 | 29  | R     | 2        | 408.2809            | 408.2809 |           |
|                     | 3488.669 |           | 3488.669 | 30  | P     | 1        | 252.1798            | 252.1798 |           |
|                     |          |           |          | 31  | K     | 0        | 155.127             | 155.127  |           |

#### general information

|                       |             |
|-----------------------|-------------|
| Annotation:           | 14 of 31    |
| AminoAcids Coverage:  | 45 %        |
| Intensity Coverage:   | 18 %        |
| Protein Localisation: | 164 ... 194 |

Source: 20120510\_VR\_Bsu\_TripleSILACrep1\_T1 L1 T2\_OG\_F08  
 Scannumber: 8707  
 Protein: BSU32780; yusF  
 Peptide Score: 73.89  
 Method: ITMS; CID; 3

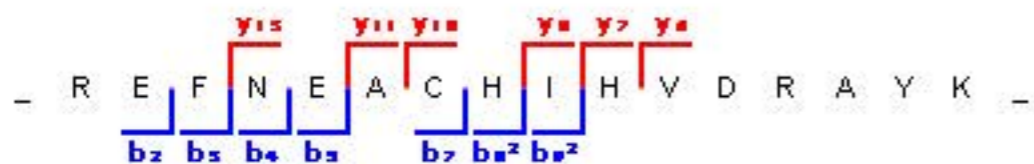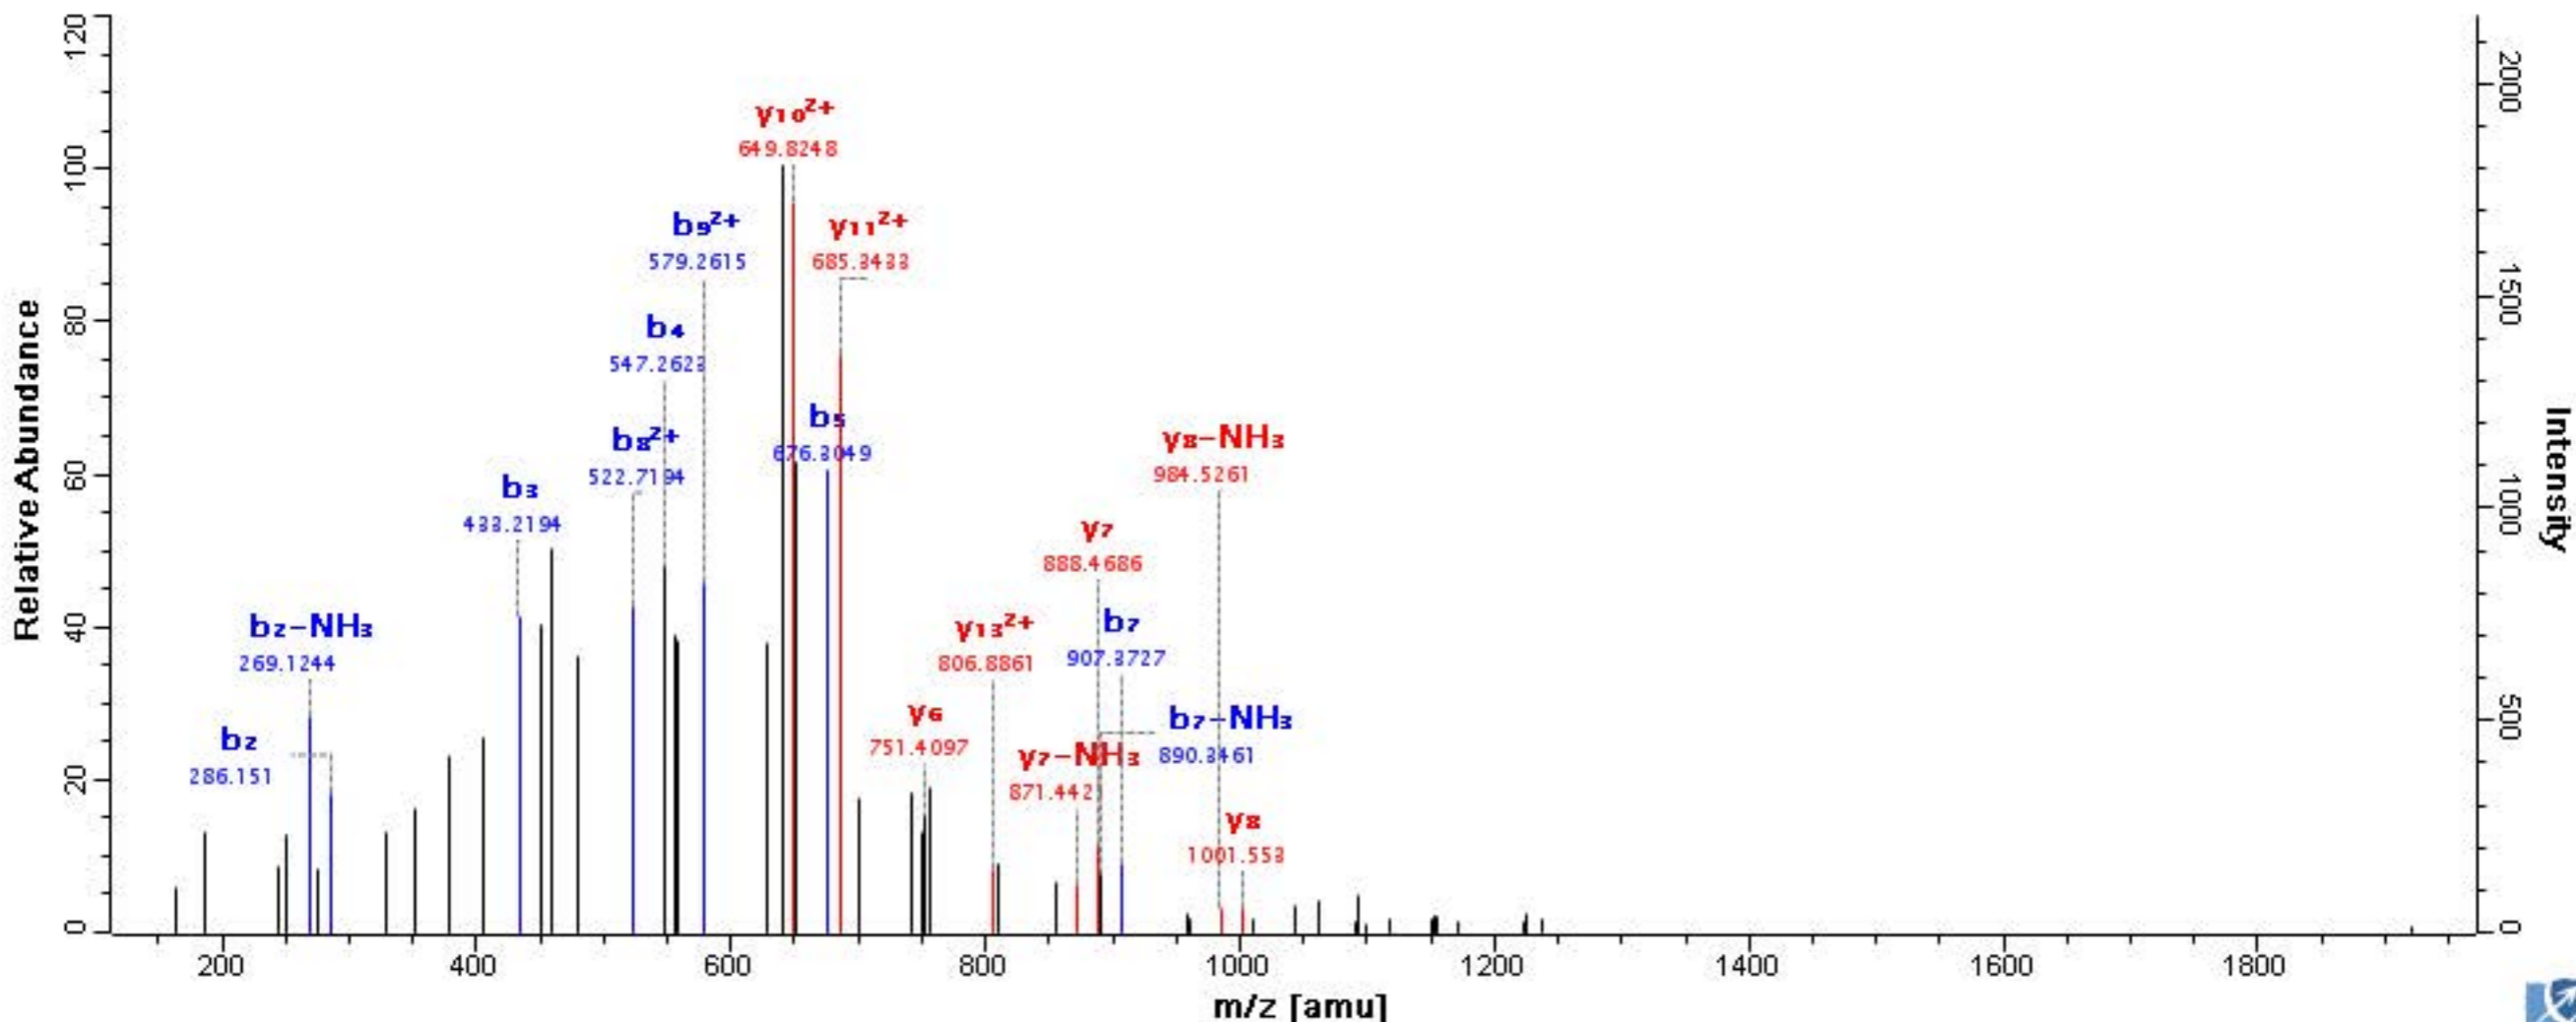

#### precursor information

|                   |                     |
|-------------------|---------------------|
| Mass:             | 2043.97061          |
| m/z:              | System.Collections. |
| Charge:           | System.Collections. |
| Retentiontime:    | System.Collections. |
| Score:            | 73.88673            |
| Mass Error [ppm]: | 0.43295             |
| PEP:              | 0.00055851          |
| Precursor Type:   | MULTI               |

| b <sup>2+</sup> ion |          | b ion     |          | seq |   |    | y ion    |           | y <sup>2+</sup> ion |           |
|---------------------|----------|-----------|----------|-----|---|----|----------|-----------|---------------------|-----------|
| Δ dalton            | mass     | Δ dalton  | mass     |     |   |    | Δ dalton | mass      | Δ dalton            | mass      |
|                     | 157.1084 |           | 157.1084 | 1   | R | 15 |          |           |                     |           |
|                     | 286.151  | -0.005473 | 286.151  | 2   | E | 14 | 1888.876 |           | 1888.876            |           |
|                     | 433.2194 | +0.210171 | 433.2194 | 3   | F | 13 | 1759.833 |           | 1759.833            |           |
|                     | 547.2623 | -0.02813  | 547.2623 | 4   | N | 12 | 1612.765 |           | 806.8861            | +0.060941 |
|                     | 676.3049 | +0.028093 | 676.3049 | 5   | E | 11 | 1498.722 |           | 1498.722            |           |
|                     | 747.342  |           | 747.342  | 6   | A | 10 | 1369.679 |           | 685.3433            | +0.18738  |
|                     | 907.3727 | +0.12305  | 907.3727 | 7   | C | 9  | 1298.642 |           | 649.8248            | +0.076054 |
| +0.432362           | 522.7194 |           | 1044.432 | 8   | H | 8  | 1138.612 |           | 1138.612            |           |
| -0.22582            | 579.2615 |           | 1157.516 | 9   | I | 7  | 1001.553 | +0.056257 | 1001.553            |           |
|                     | 1294.575 |           | 1294.575 | 10  | H | 6  | 888.4686 | -0.11981  | 888.4686            |           |
|                     | 1393.643 |           | 1393.643 | 11  | V | 5  | 751.4097 | +0.240615 | 751.4097            |           |
|                     | 1508.67  |           | 1508.67  | 12  | D | 4  | 652.3413 |           | 652.3413            |           |
|                     | 1664.771 |           | 1664.771 | 13  | R | 3  | 537.3144 |           | 537.3144            |           |
|                     | 1735.808 |           | 1735.808 | 14  | A | 2  | 381.2132 |           | 381.2132            |           |
|                     | 1898.871 |           | 1898.871 | 15  | Y | 1  | 310.1761 |           | 310.1761            |           |
|                     |          |           |          | 16  | K | 0  | 147.1128 |           | 147.1128            |           |

#### general information

|                       |            |
|-----------------------|------------|
| Annotation:           | 10 of 16   |
| AminoAcids Coverag    | 62 %       |
| Intensity Coverage:   | 41 %       |
| Protein Localisation: | 98 ... 113 |

Source: 20120510\_VR\_Bsu\_TripleSILACrep1\_T1L1 T2\_OG\_F09  
 Scannumber: 17672  
 Protein: BSU06270; ydjO  
 Peptide Score: 93.51  
 Method: ITMS; CID; 3

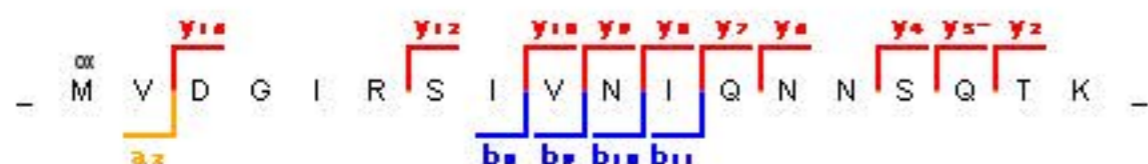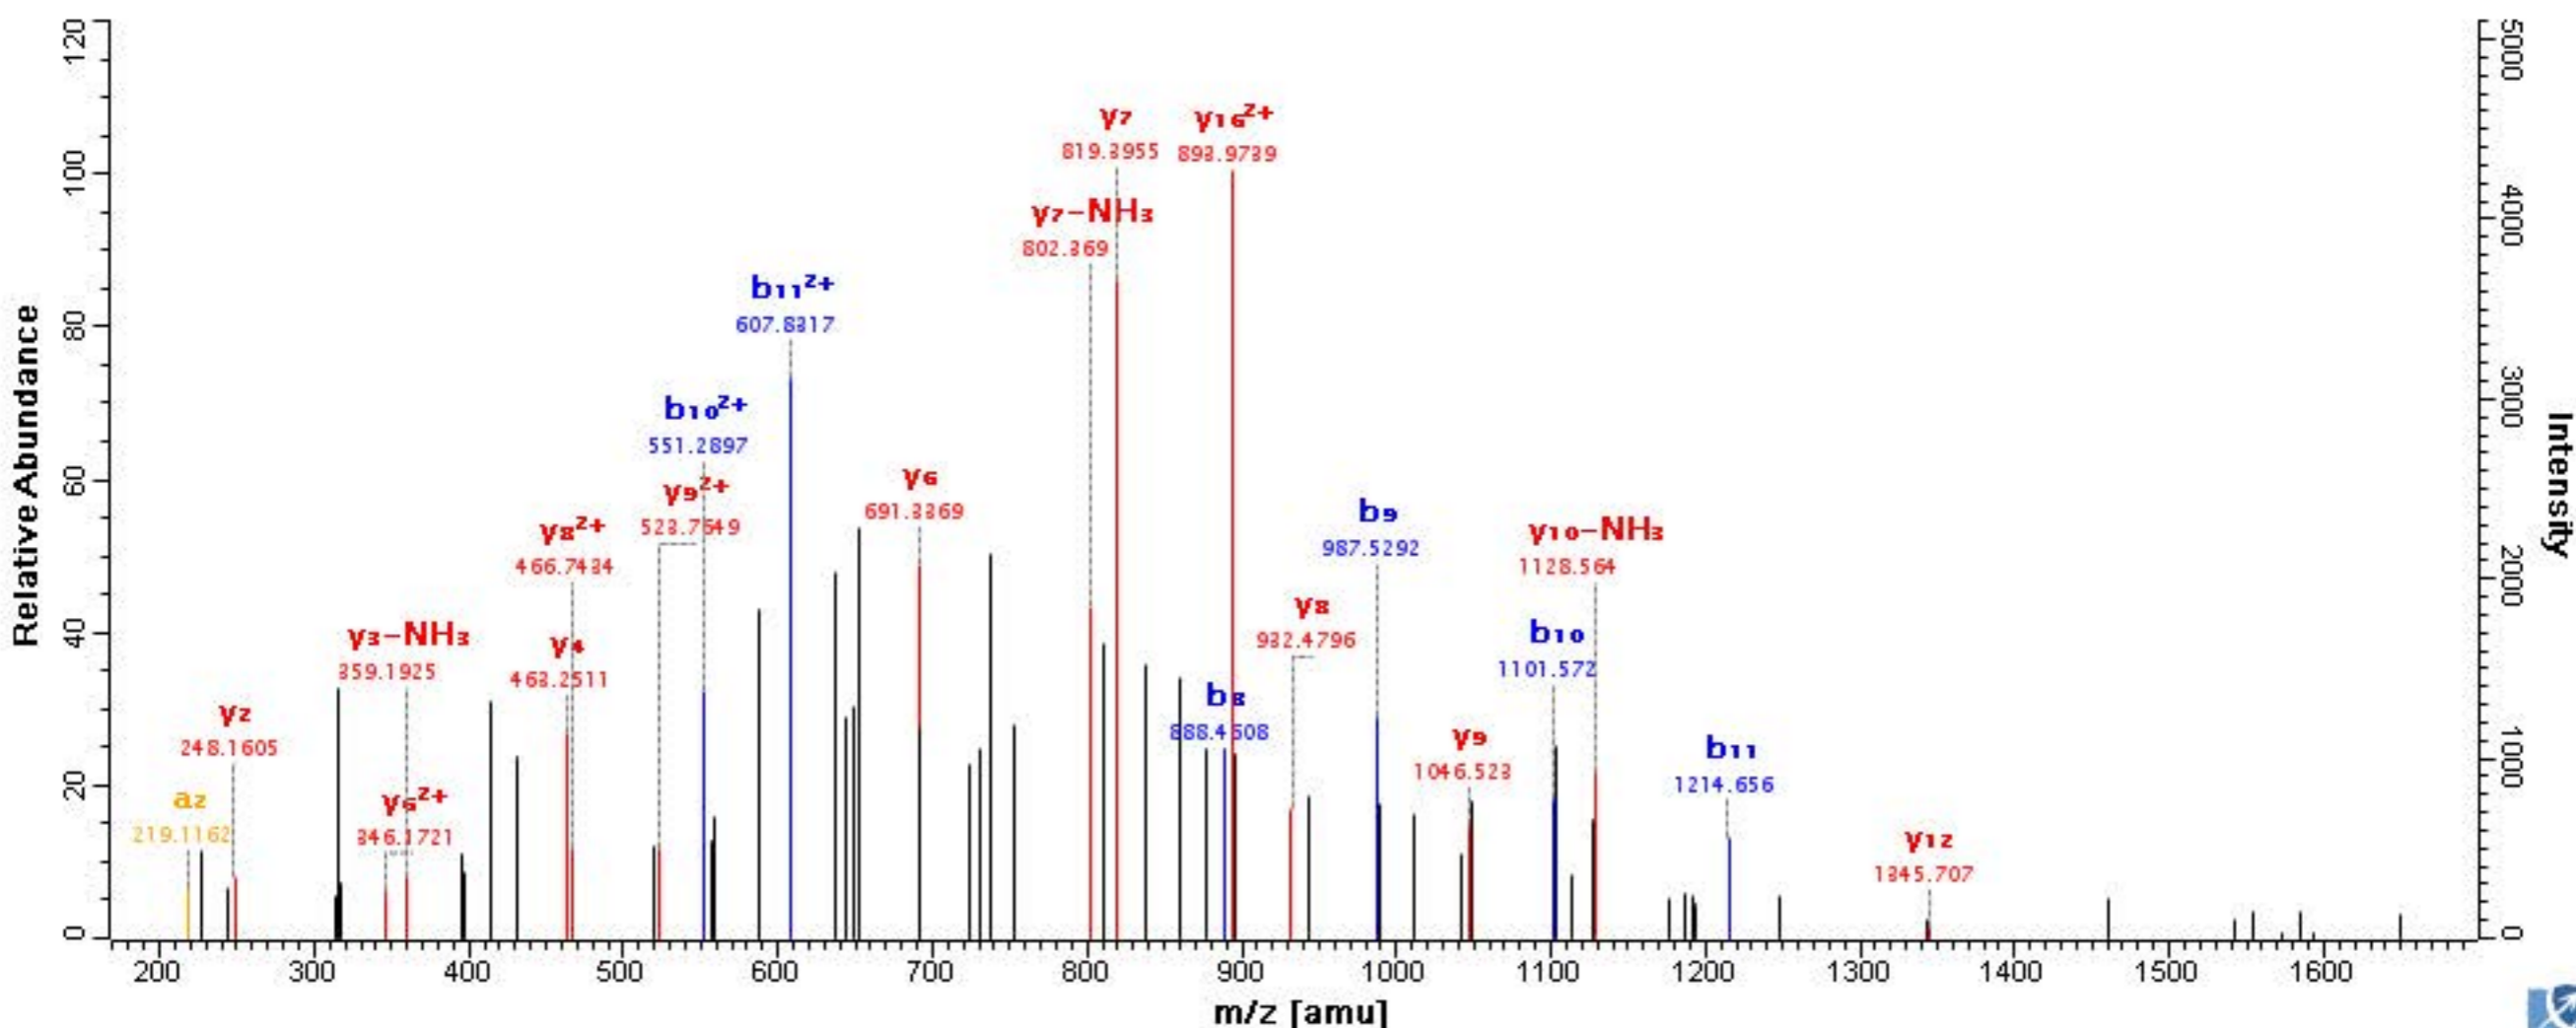

**precursor information**

|                   |                     |
|-------------------|---------------------|
| Mass:             | 2032.03507          |
| m/z:              | System.Collections. |
| Charge:           | System.Collections. |
| Retentiontime:    | System.Collections. |
| Score:            | 93.50977            |
| Mass Error [ppm]: | -1.0184             |
| PEP:              | 2.3134E-09          |
| Precursor Type:   | MULTI               |

**general information**

|                       |           |
|-----------------------|-----------|
| Annotation:           | 12 of 18  |
| AminoAcids Coverage:  | 67 %      |
| Intensity Coverage:   | 39 %      |
| Protein Localisation: | 50 ... 67 |

| a ion    |         | b <sup>2+</sup> ion |         | b ion    |         |    |     | y ion    |         | y <sup>2+</sup> ion |                 |
|----------|---------|---------------------|---------|----------|---------|----|-----|----------|---------|---------------------|-----------------|
| Δ dalton | mass    | Δ dalton            | mass    | Δ dalton | mass    |    | seq | Δ dalton | mass    | Δ dalton            | mass            |
|          | 120.048 |                     | 148.043 |          | 148.043 | 1  | M   | 17       |         |                     |                 |
| +0.06153 | 219.116 |                     | 247.111 |          | 247.111 | 2  | V   | 16       | 1886.01 |                     | 1886.01         |
|          | 334.143 |                     | 362.138 |          | 362.138 | 3  | D   | 15       | 1786.94 |                     | 893.974 +0.2286 |
|          | 391.165 |                     | 419.159 |          | 419.159 | 4  | G   | 14       | 1671.91 |                     | 1671.91         |
|          | 504.249 |                     | 532.244 |          | 532.244 | 5  | I   | 13       | 1614.89 |                     | 1614.89         |
|          | 660.35  |                     | 688.345 |          | 688.345 | 6  | R   | 12       | 1501.81 |                     | 1501.81         |
|          | 747.382 |                     | 775.377 |          | 775.377 | 7  | S   | 11       | 1345.71 | -0.0066             | 1345.71         |
|          | 860.466 |                     | 888.461 | -0.1188  | 888.461 | 8  | I   | 10       | 1258.67 |                     | 1258.67         |
|          | 959.534 |                     | 987.529 | +0.1134  | 987.529 | 9  | V   | 9        | 1145.59 |                     | 1145.59         |
|          | 1073.58 | +0.26628            | 1101.57 | +0.04801 | 1101.57 | 10 | N   | 8        | 1046.52 | +0.10566            | 1046.52 -0.0353 |
|          | 1186.66 | +0.38495            | 1214.66 | +0.18111 | 1214.66 | 11 | I   | 7        | 932.48  | -0.2967             | 932.48 +0.4956  |
|          | 1314.72 |                     | 1342.71 |          | 1342.71 | 12 | Q   | 6        | 819.396 | -0.005              | 819.396         |
|          | 1428.76 |                     | 1456.76 |          | 1456.76 | 13 | N   | 5        | 691.337 | -0.0314             | 691.337 -0.1031 |
|          | 1542.81 |                     | 1570.8  |          | 1570.8  | 14 | N   | 4        | 577.294 |                     | 577.294         |
|          | 1629.84 |                     | 1657.83 |          | 1657.83 | 15 | S   | 3        | 463.251 | +0.00111            | 463.251         |
|          | 1757.9  |                     | 1785.89 |          | 1785.89 | 16 | Q   | 2        | 376.219 |                     | 376.219         |
|          | 1858.94 |                     | 1886.94 |          | 1886.94 | 17 | T   | 1        | 248.16  | +0.29002            | 248.16          |
|          |         |                     |         |          |         | 18 | K   | 0        | 147.113 |                     | 147.113         |

Source: 20120510\_VR\_Bsu\_TripleSILACrep1\_T1L1T2\_OG\_F09  
 Scannumber: 19581  
 Protein: BSU09730; yheG  
 Peptide Score: 103.04  
 Method: ITMS; CID; 3

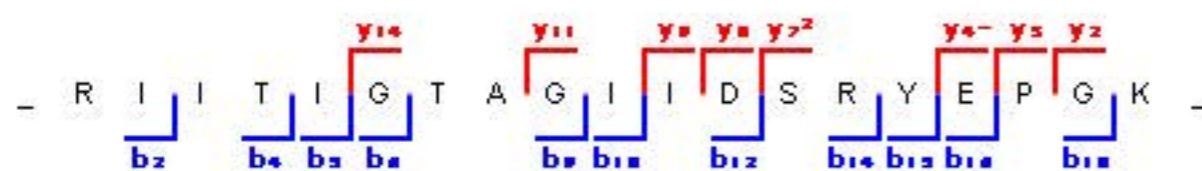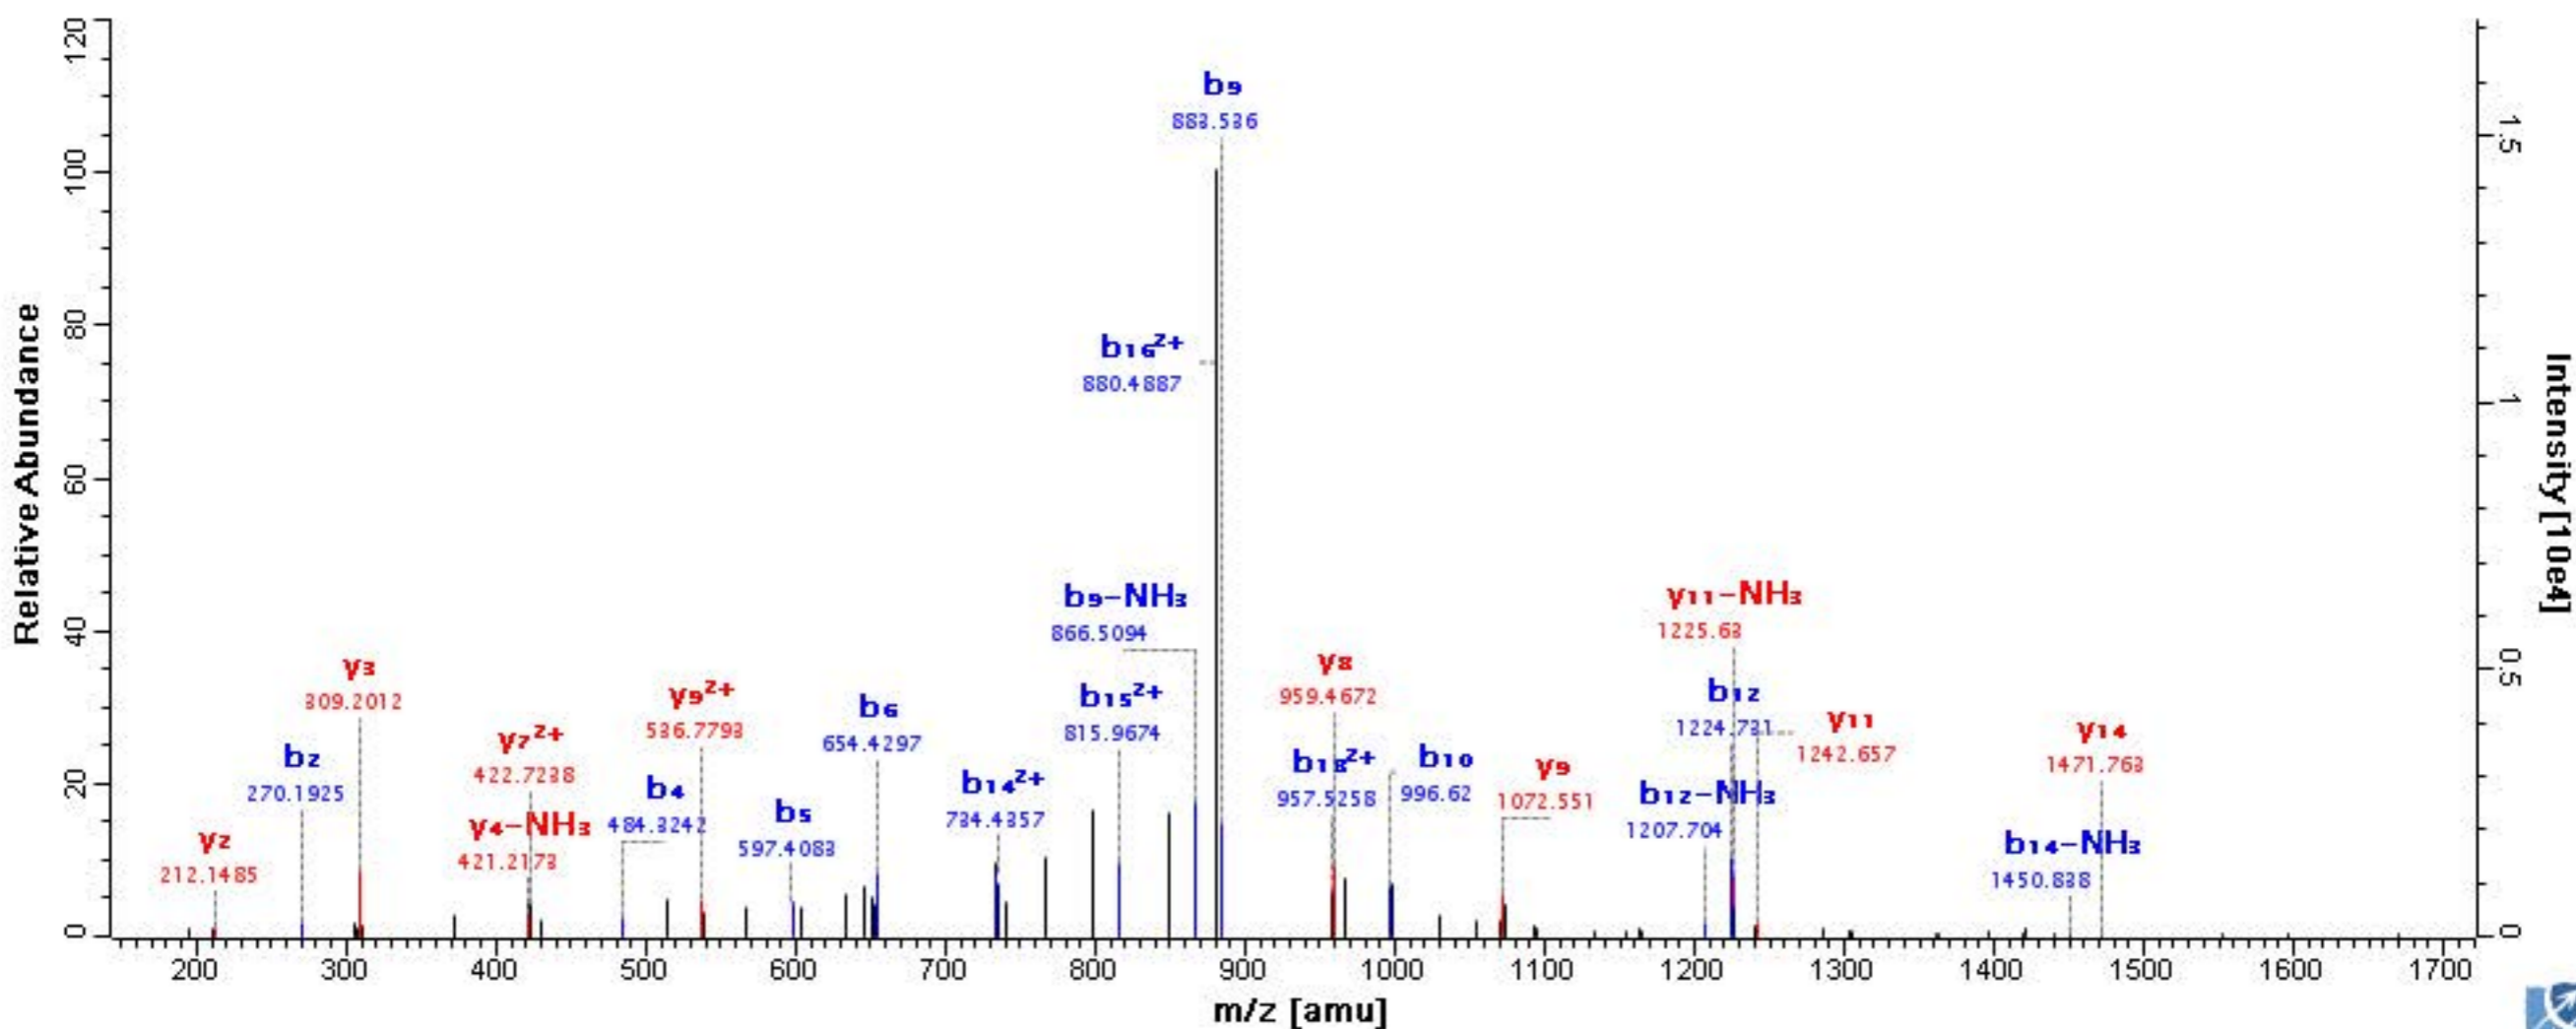

precursor information

|                   |                     |
|-------------------|---------------------|
| Mass:             | 2059.14164          |
| m/z:              | System.Collections. |
| Charge:           | System.Collections. |
| Retentiontime:    | System.Collections. |
| Score:            | 103.0415            |
| Mass Error [ppm]: | -0.45733            |
| PEP:              | 4.8337E-12          |
| Precursor Type:   | MULTI               |

| b <sup>2+</sup> ion |          | b ion     |          | seq |   | y ion    |          | y <sup>2+</sup> ion |          |
|---------------------|----------|-----------|----------|-----|---|----------|----------|---------------------|----------|
| Δ dalton            | mass     | Δ dalton  | mass     |     |   | Δ dalton | mass     | Δ dalton            | mass     |
|                     | 157.1084 |           | 157.1084 | 1   | R | 18       |          |                     |          |
|                     | 270.1925 | +0.158989 | 270.1925 | 2   | I | 17       | 1912.063 |                     | 1912.063 |
|                     | 383.2765 |           | 383.2765 | 3   | I | 16       | 1798.979 |                     | 1798.979 |
|                     | 484.3242 | +0.314356 | 484.3242 | 4   | T | 15       | 1685.895 |                     | 1685.895 |
|                     | 597.4083 | +0.150458 | 597.4083 | 5   | I | 14       | 1584.847 |                     | 1584.847 |
|                     | 654.4297 | -0.041599 | 654.4297 | 6   | G | 13       | 1471.763 | +0.056254           | 1471.763 |
|                     | 755.4774 |           | 755.4774 | 7   | T | 12       | 1414.742 |                     | 1414.742 |
|                     | 826.5145 |           | 826.5145 | 8   | A | 11       | 1313.694 |                     | 1313.694 |
|                     | 883.536  | +0.010714 | 883.536  | 9   | G | 10       | 1242.657 | +0.18082            | 1242.657 |
|                     | 996.62   | -0.080796 | 996.62   | 10  | I | 9        | 1185.635 |                     | 1185.635 |
|                     | 1109.704 |           | 1109.704 | 11  | I | 8        | 1072.551 | -0.039824           | 536.7793 |
|                     | 1224.731 | +0.004425 | 1224.731 | 12  | D | 7        | 959.4672 | -0.04127            | 959.4672 |
|                     | 1311.763 |           | 1311.763 | 13  | S | 6        | 844.4403 |                     | 422.7238 |
|                     | 734.4357 |           | 1467.864 | 14  | R | 5        | 757.4083 |                     | 757.4083 |
|                     | 815.9674 |           | 1630.928 | 15  | Y | 4        | 601.3072 |                     | 601.3072 |
|                     | 880.4887 |           | 1759.97  | 16  | E | 3        | 438.2438 |                     | 438.2438 |
|                     | 1857.023 |           | 1857.023 | 17  | P | 2        | 309.2012 | -0.113889           | 309.2012 |
|                     | 957.5258 |           | 1914.044 | 18  | G | 1        | 212.1485 | -0.03604            | 212.1485 |
|                     |          |           |          | 19  | K | 0        | 155.127  |                     | 155.127  |

general information

|                       |            |
|-----------------------|------------|
| Annotation:           | 14 of 19   |
| AminoAcids Coverag    | 74%        |
| Intensity Coverage:   | 33%        |
| Protein Localisation: | 97 ... 115 |

Source: 20120510\_VR\_Bsu\_TripleSILACrep1\_T1L1T2\_OG\_F10  
 Scannumber: 20288  
 Protein: BSU11640; yjbQ  
 Peptide Score: 105.65  
 Method: ITMS; CID; 3

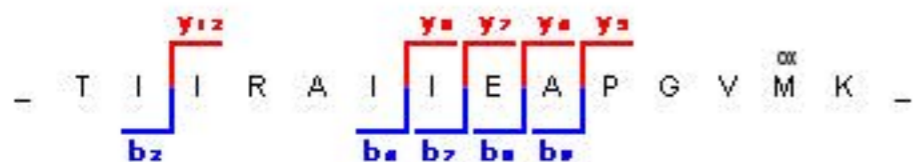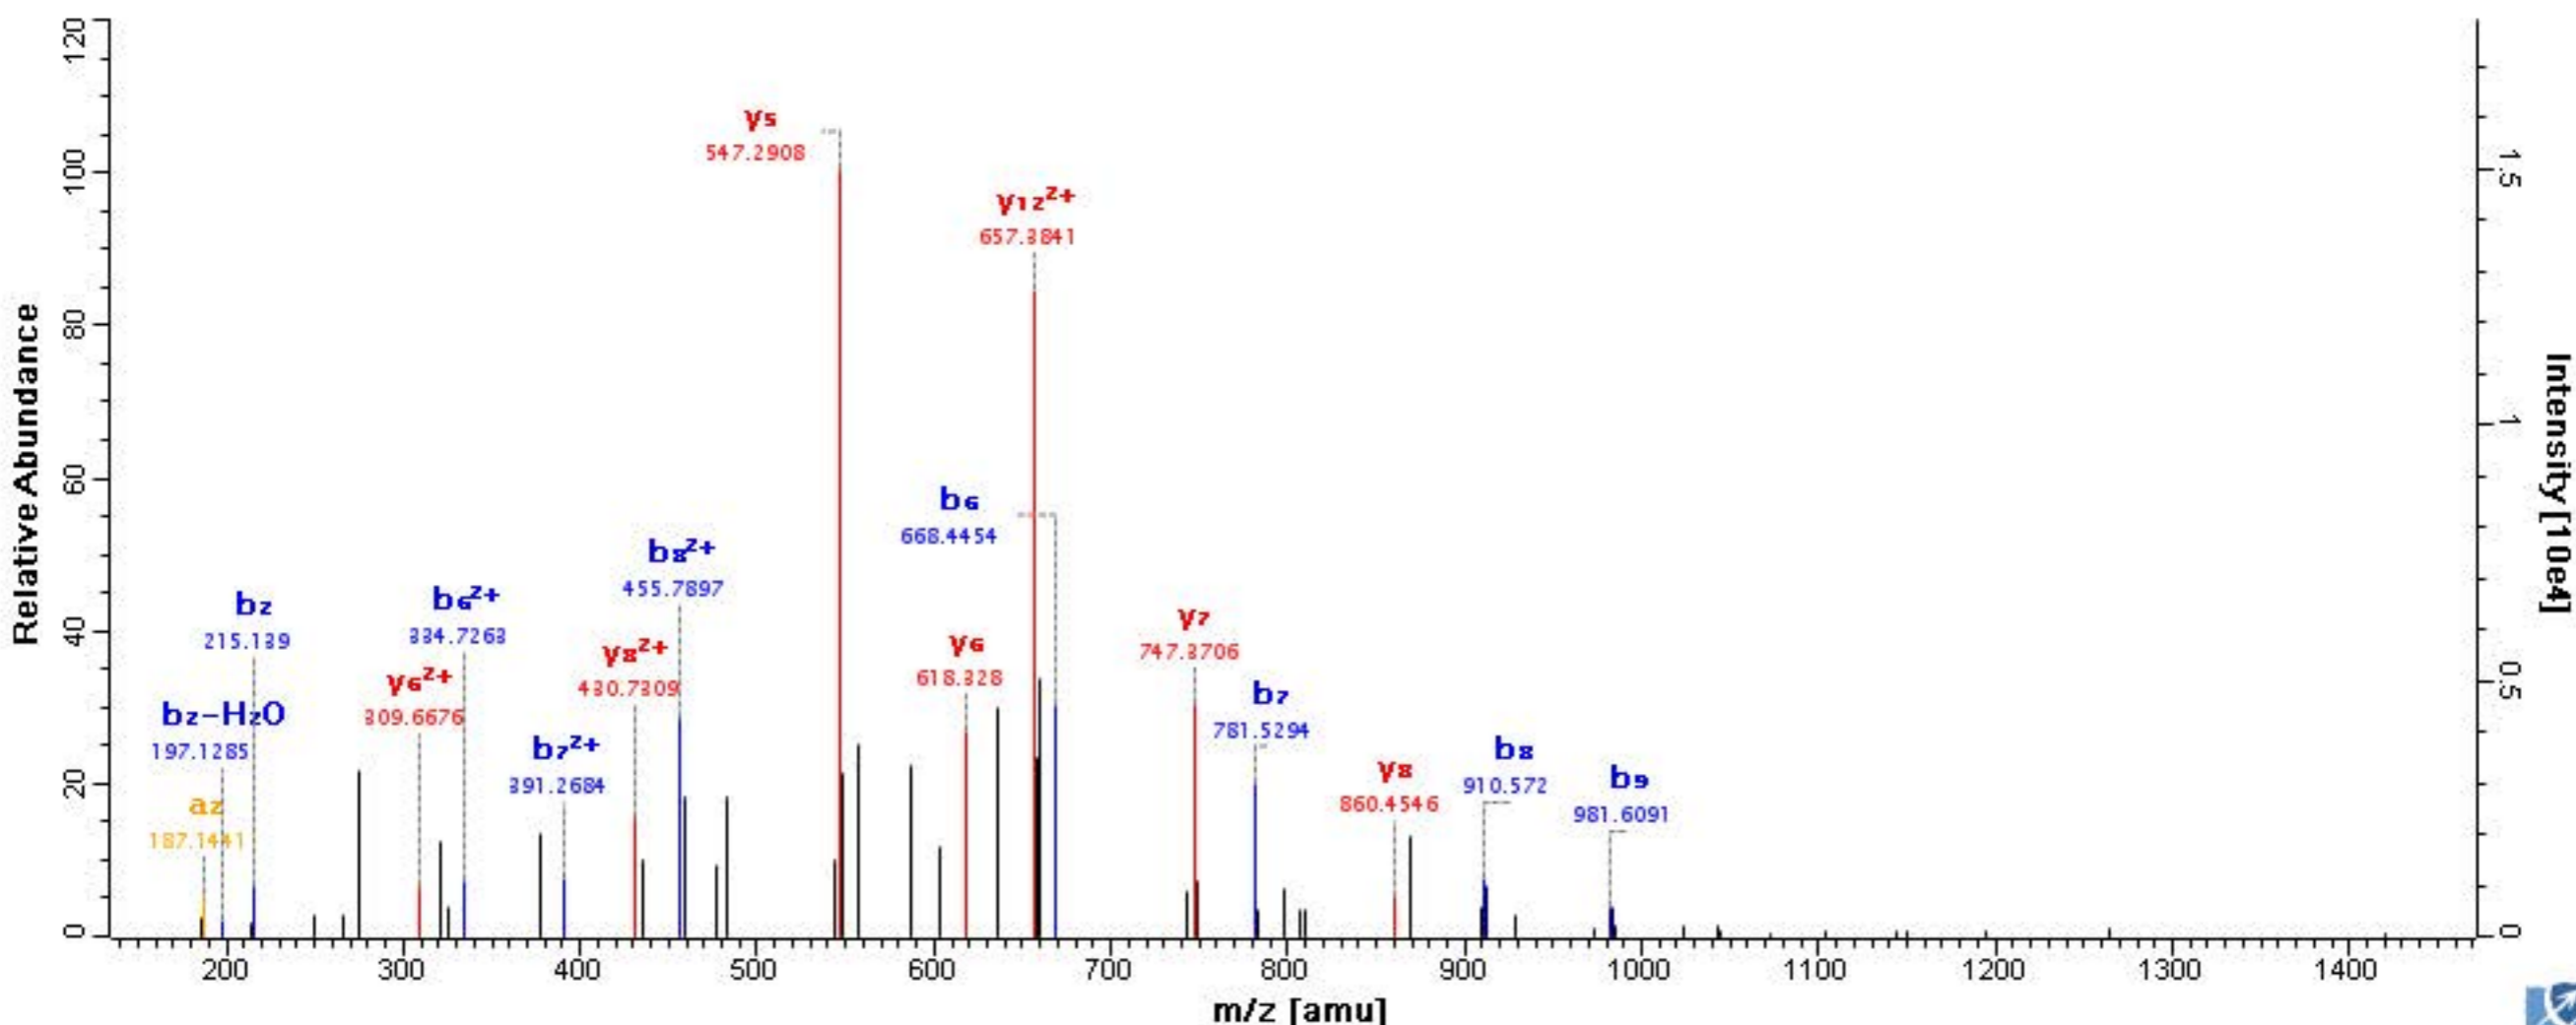

#### precursor information

|                   |                     |
|-------------------|---------------------|
| Mass:             | 1526.88488          |
| m/z:              | System.Collections. |
| Charge:           | System.Collections. |
| Retentiontime:    | System.Collections. |
| Score:            | 105.649             |
| Mass Error [ppm]: | -0.36148            |
| PEP:              | 0.00021999          |
| Precursor Type:   | MULTI               |

#### general information

|                       |             |
|-----------------------|-------------|
| Annotation:           | 8 of 14     |
| AminoAcids Coverage:  | 57 %        |
| Intensity Coverage:   | 51 %        |
| Protein Localisation: | 524 ... 537 |

| a ion    |         | b <sup>2+</sup> ion |         | b ion    |          |    |     |    | y ion    |          | y <sup>2+</sup> ion |         |
|----------|---------|---------------------|---------|----------|----------|----|-----|----|----------|----------|---------------------|---------|
| Δ dalton | mass    | Δ dalton            | mass    | Δ dalton | mass     |    | seq |    | Δ dalton | mass     | Δ dalton            | mass    |
|          | 74.06   |                     | 102.055 |          | 102.055  | 1  | T   | 13 |          |          |                     |         |
| +0.06953 | 187.144 |                     | 215.139 | +0.1121  | 215.139  | 2  | I   | 12 | 1426.85  |          | 1426.85             |         |
|          | 300.228 |                     | 328.223 |          | 328.223  | 3  | I   | 11 | 1313.76  |          | 657.384             | +0.0721 |
|          | 456.329 |                     | 484.324 |          | 484.324  | 4  | R   | 10 | 1200.68  |          | 1200.68             |         |
|          | 527.366 |                     | 555.361 |          | 555.361  | 5  | A   | 9  | 1044.58  |          | 1044.58             |         |
|          | 640.45  | +0.2172             | 334.726 | -0.0195  | 668.445  | 6  | I   | 8  | 973.539  |          | 973.539             |         |
|          | 753.535 | -0.0721             | 391.268 | +0.2061  | 781.529  | 7  | I   | 7  | 860.455  | +0.2171  | 430.731             | +0.4324 |
|          | 882.577 | -0.0112             | 455.79  | +0.0518  | 7910.572 | 8  | E   | 6  | 747.371  | +0.1798  | 747.371             |         |
|          | 953.614 |                     | 981.609 | +0.1455  | 981.609  | 9  | A   | 5  | 618.328  | -0.0303  | 309.668             | +0.1259 |
|          | 1050.67 |                     | 1078.66 |          | 1078.66  | 10 | P   | 4  | 547.291  | +0.00133 | 547.291             |         |
|          | 1107.69 |                     | 1135.68 |          | 1135.68  | 11 | G   | 3  | 450.238  |          | 450.238             |         |
|          | 1206.76 |                     | 1234.75 |          | 1234.75  | 12 | V   | 2  | 393.217  |          | 393.217             |         |
|          | 1353.79 |                     | 1381.79 |          | 1381.79  | 13 | M   | 1  | 294.148  |          | 294.148             |         |
|          |         |                     |         |          |          | 14 | K   | 0  | 147.113  |          | 147.113             |         |

Source: 20120510\_VR\_Bsu\_TripleSILACrep1\_T1L1T2\_OG\_F10  
 Scannumber: 24134  
 Protein: BSU09070; yhcG  
 Peptide Score: 108.56  
 Method: ITMS; CID; 3

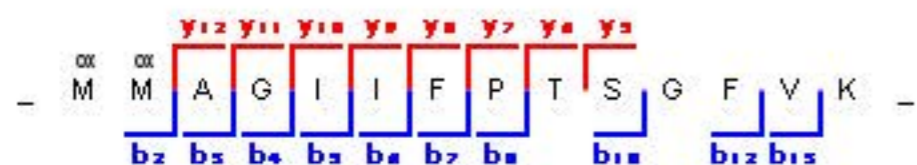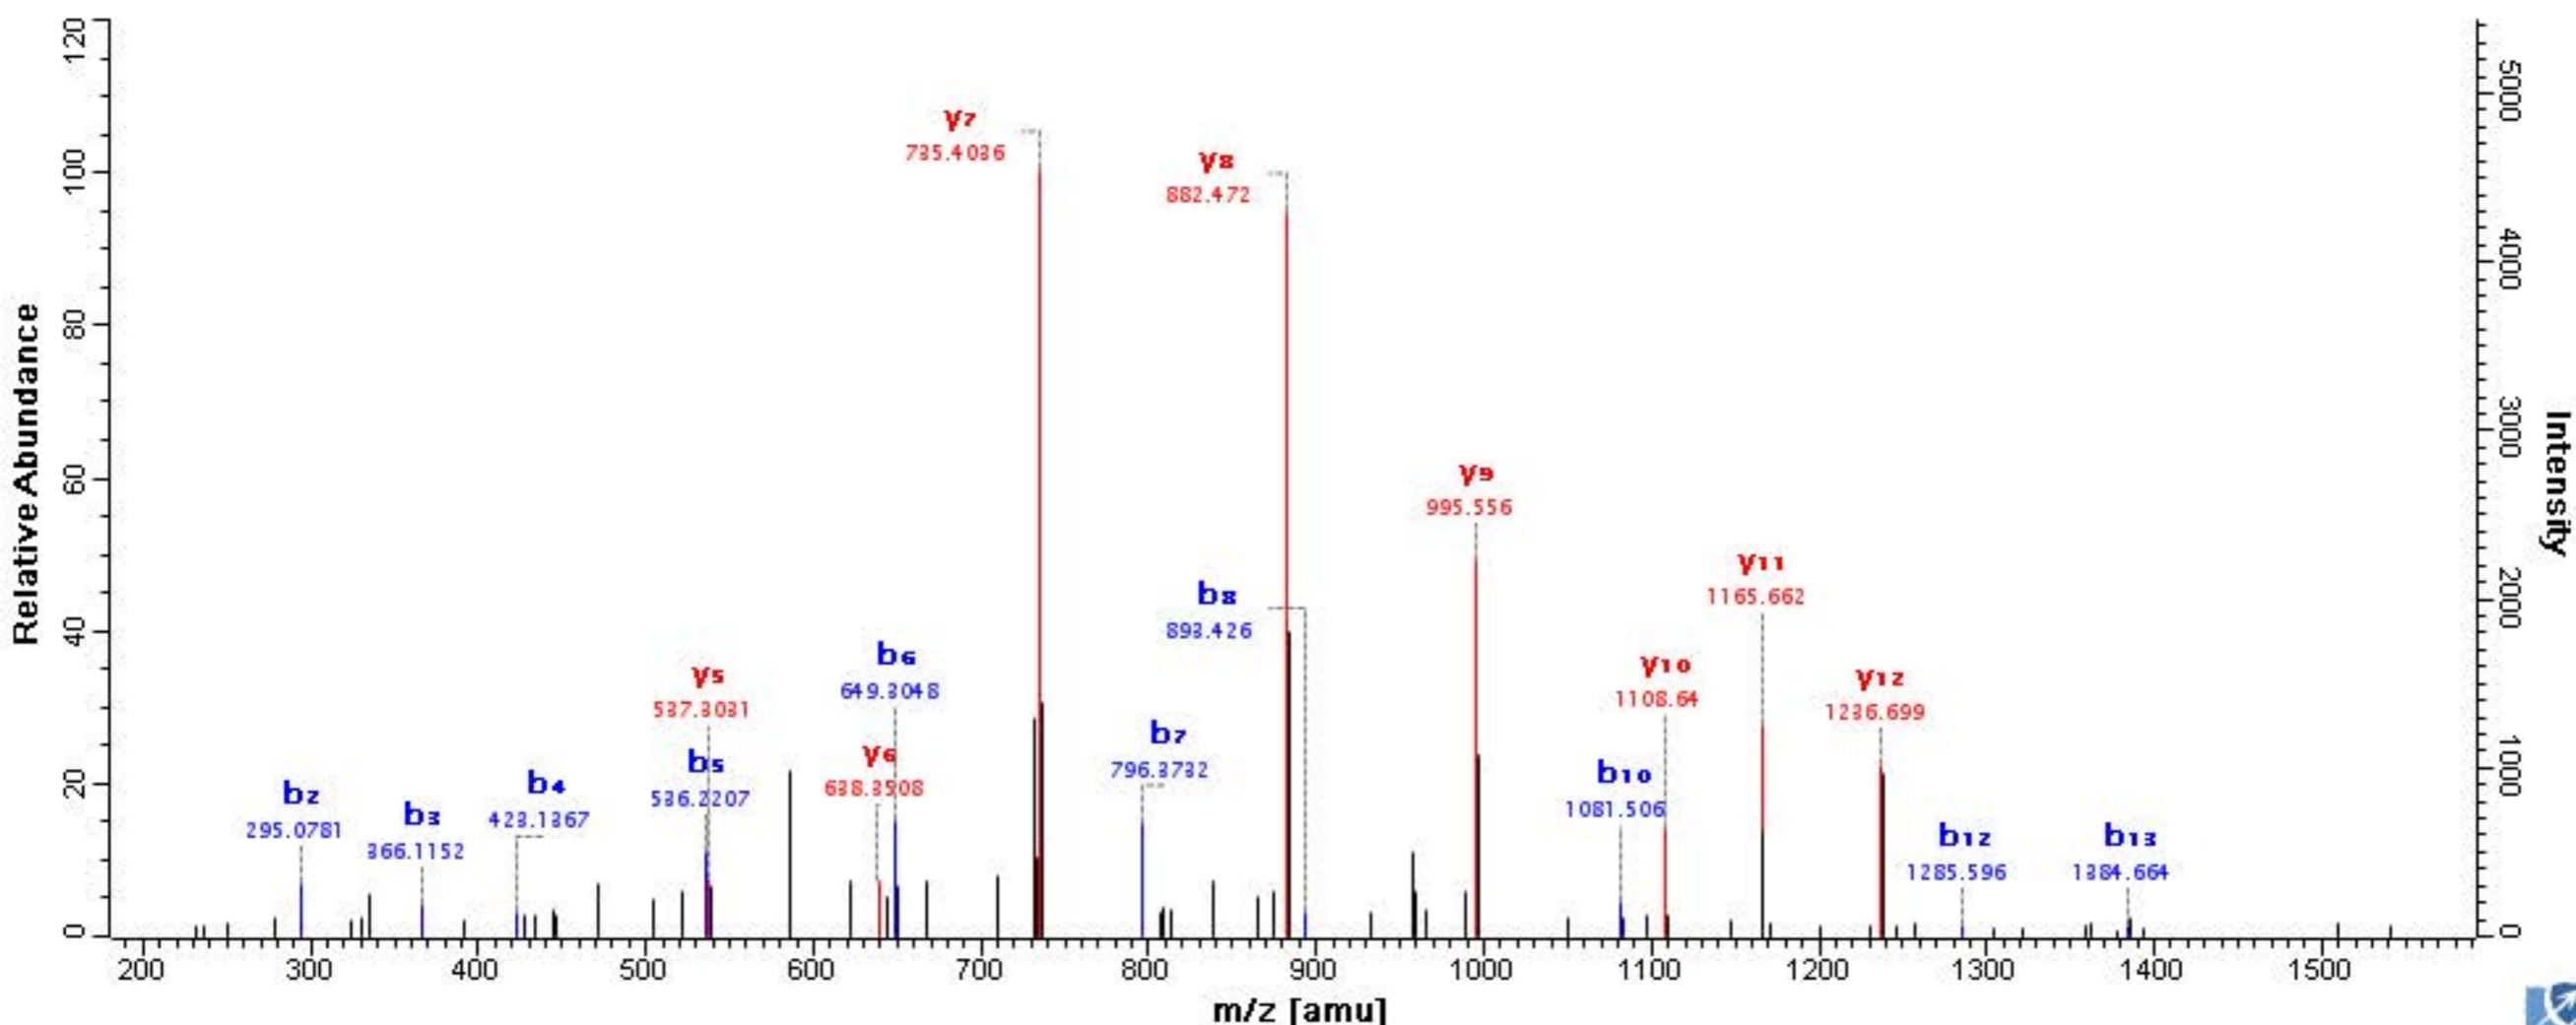

#### precursor information

|                   |                     |
|-------------------|---------------------|
| Mass:             | 1529.76241          |
| m/z:              | System.Collections. |
| Charge:           | System.Collections. |
| Retentiontime:    | System.Collections. |
| Score:            | 108.5638            |
| Mass Error [ppm]: | 0.13029             |
| PEP:              | 0.00017484          |
| Precursor Type:   | MULTI               |

#### general information

|                       |           |
|-----------------------|-----------|
| Annotation:           | 11 of 14  |
| AminoAcids Coverage:  | 79 %      |
| Intensity Coverage:   | 51 %      |
| Protein Localisation: | 47 ... 60 |

| b ion      |                |    |     |    |                | y ion      |  |
|------------|----------------|----|-----|----|----------------|------------|--|
| Δ dalton   | mass           |    | seq |    | Δ dalton       | mass       |  |
|            | 148.042675695  | 1  | M   | 13 |                |            |  |
| -0.1410937 | 295.078074923  | 2  | M   | 12 | 1383.734085079 |            |  |
| +0.1942595 | 366.115188711  | 3  | A   | 11 | 1236.698685851 | +0.0199421 |  |
| +0.0783439 | 423.136652435  | 4  | G   | 10 | 1165.661572063 | +0.0913576 |  |
| +0.05089   | 536.220716415  | 5  | I   | 9  | 1108.64010834  | +0.0855997 |  |
| -0.0527662 | 649.304780395  | 6  | I   | 8  | 995.556044359  | +0.0229351 |  |
| -0.0248056 | 796.373194312  | 7  | F   | 7  | 882.471980379  | -0.0162309 |  |
| -0.3465514 | 893.425958164  | 8  | P   | 6  | 735.403566463  | -0.0087911 |  |
|            | 994.473636638  | 9  | T   | 5  | 638.350802611  | +0.1786774 |  |
| +0.1778066 | 1081.505665048 | 10 | S   | 4  | 537.303124136  | -0.0011832 |  |
|            | 1138.527128771 | 11 | G   | 3  | 450.271095727  |            |  |
| -0.0205915 | 1285.595542687 | 12 | F   | 2  | 393.249632003  |            |  |
| +0.2070151 | 1384.663956604 | 13 | V   | 1  | 246.181218087  |            |  |
|            |                | 14 | K   | 0  | 147.112804171  |            |  |

Source: 20120510\_VR\_Bsu\_TripleSILACrep1\_T1L1T2\_OG\_F10  
 Scannumber: 27486  
 Protein: BSU39490; LP9F; yxeN  
 Peptide Score: 90.93  
 Method: ITMS; CID; 3

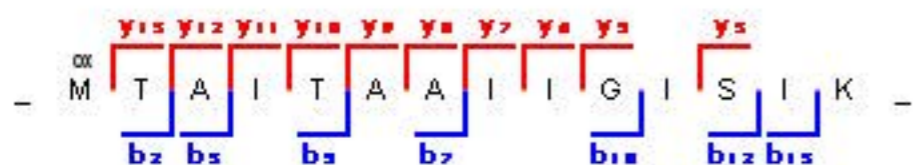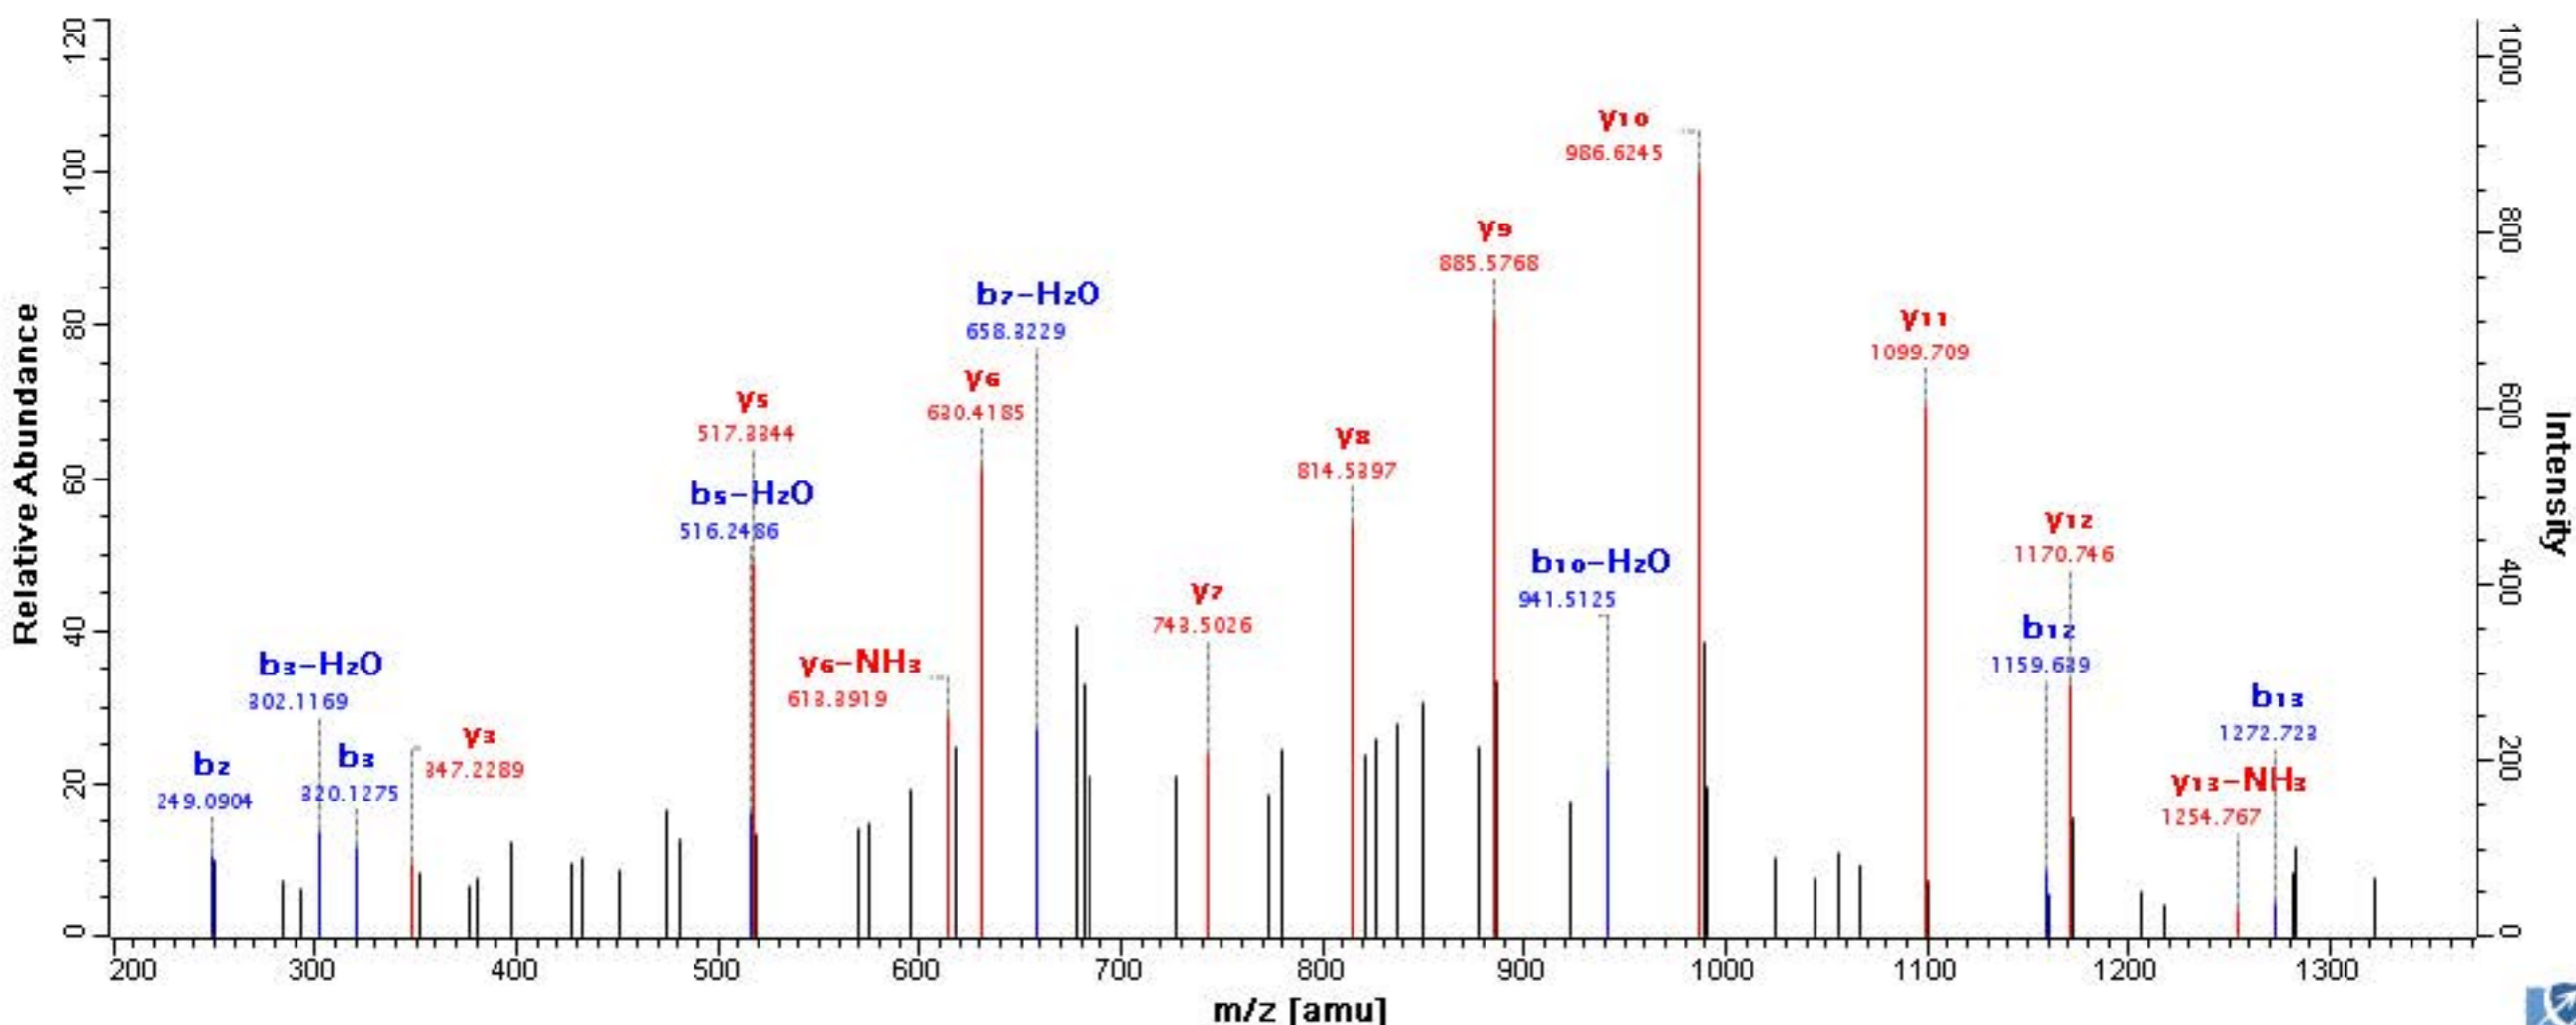

**precursor information**

|                   |                     |
|-------------------|---------------------|
| Mass:             | 1417.82119          |
| m/z:              | System.Collections. |
| Charge:           | System.Collections. |
| Retentiontime:    | System.Collections. |
| Score:            | 90.92576            |
| Mass Error [ppm]: | -0.17533            |
| PEP:              | 0.00026182          |
| Precursor Type:   | MULTI               |

**general information**

|                       |            |
|-----------------------|------------|
| Annotation:           | 11 of 14   |
| AminoAcids Coverage:  | 79 %       |
| Intensity Coverage:   | 46 %       |
| Protein Localisation: | 89 ... 102 |

| b ion           |                |    |     |    | y ion           |            |  |
|-----------------|----------------|----|-----|----|-----------------|------------|--|
| $\Delta$ dalton | mass           |    | seq |    | $\Delta$ dalton | mass       |  |
|                 | 148.042675695  | 1  | M   | 13 |                 |            |  |
| +0.0606163      | 249.090354169  | 2  | T   | 12 | 1271.793314518  |            |  |
| +0.3396341      | 320.127467957  | 3  | A   | 11 | 1170.745636044  | +0.1191101 |  |
|                 | 433.211531937  | 4  | I   | 10 | 1099.708522256  | +0.1562238 |  |
|                 | 534.259210411  | 5  | T   | 9  | 986.624458275   | +0.2390671 |  |
|                 | 605.296324199  | 6  | A   | 8  | 885.576779801   | +0.077334  |  |
|                 | 676.333437987  | 7  | A   | 7  | 814.539666014   | +0.0598213 |  |
|                 | 789.417501967  | 8  | I   | 6  | 743.502552226   | +0.1869009 |  |
|                 | 902.501565948  | 9  | I   | 5  | 630.418488245   | +0.0303643 |  |
|                 | 959.523029671  | 10 | G   | 4  | 517.334424265   | -0.0143559 |  |
|                 | 1072.607093652 | 11 | I   | 3  | 460.312960541   |            |  |
| +0.0818252      | 1159.639122062 | 12 | S   | 2  | 347.228896561   | +0.0580297 |  |
| -0.42802        | 1272.723186042 | 13 | I   | 1  | 260.196868151   |            |  |
|                 |                | 14 | K   | 0  | 147.112804171   |            |  |



Source: 20120510\_VR\_Bsu\_TripleSILACrep1\_T1L1T2\_OG\_F11  
 Scannumber: 28241  
 Protein: BSU05500; mhqP; ydfP  
 Peptide Score: 113.62  
 Method: ITMS; CID; 3

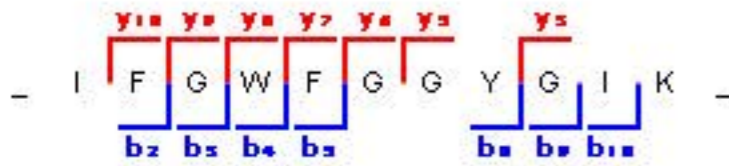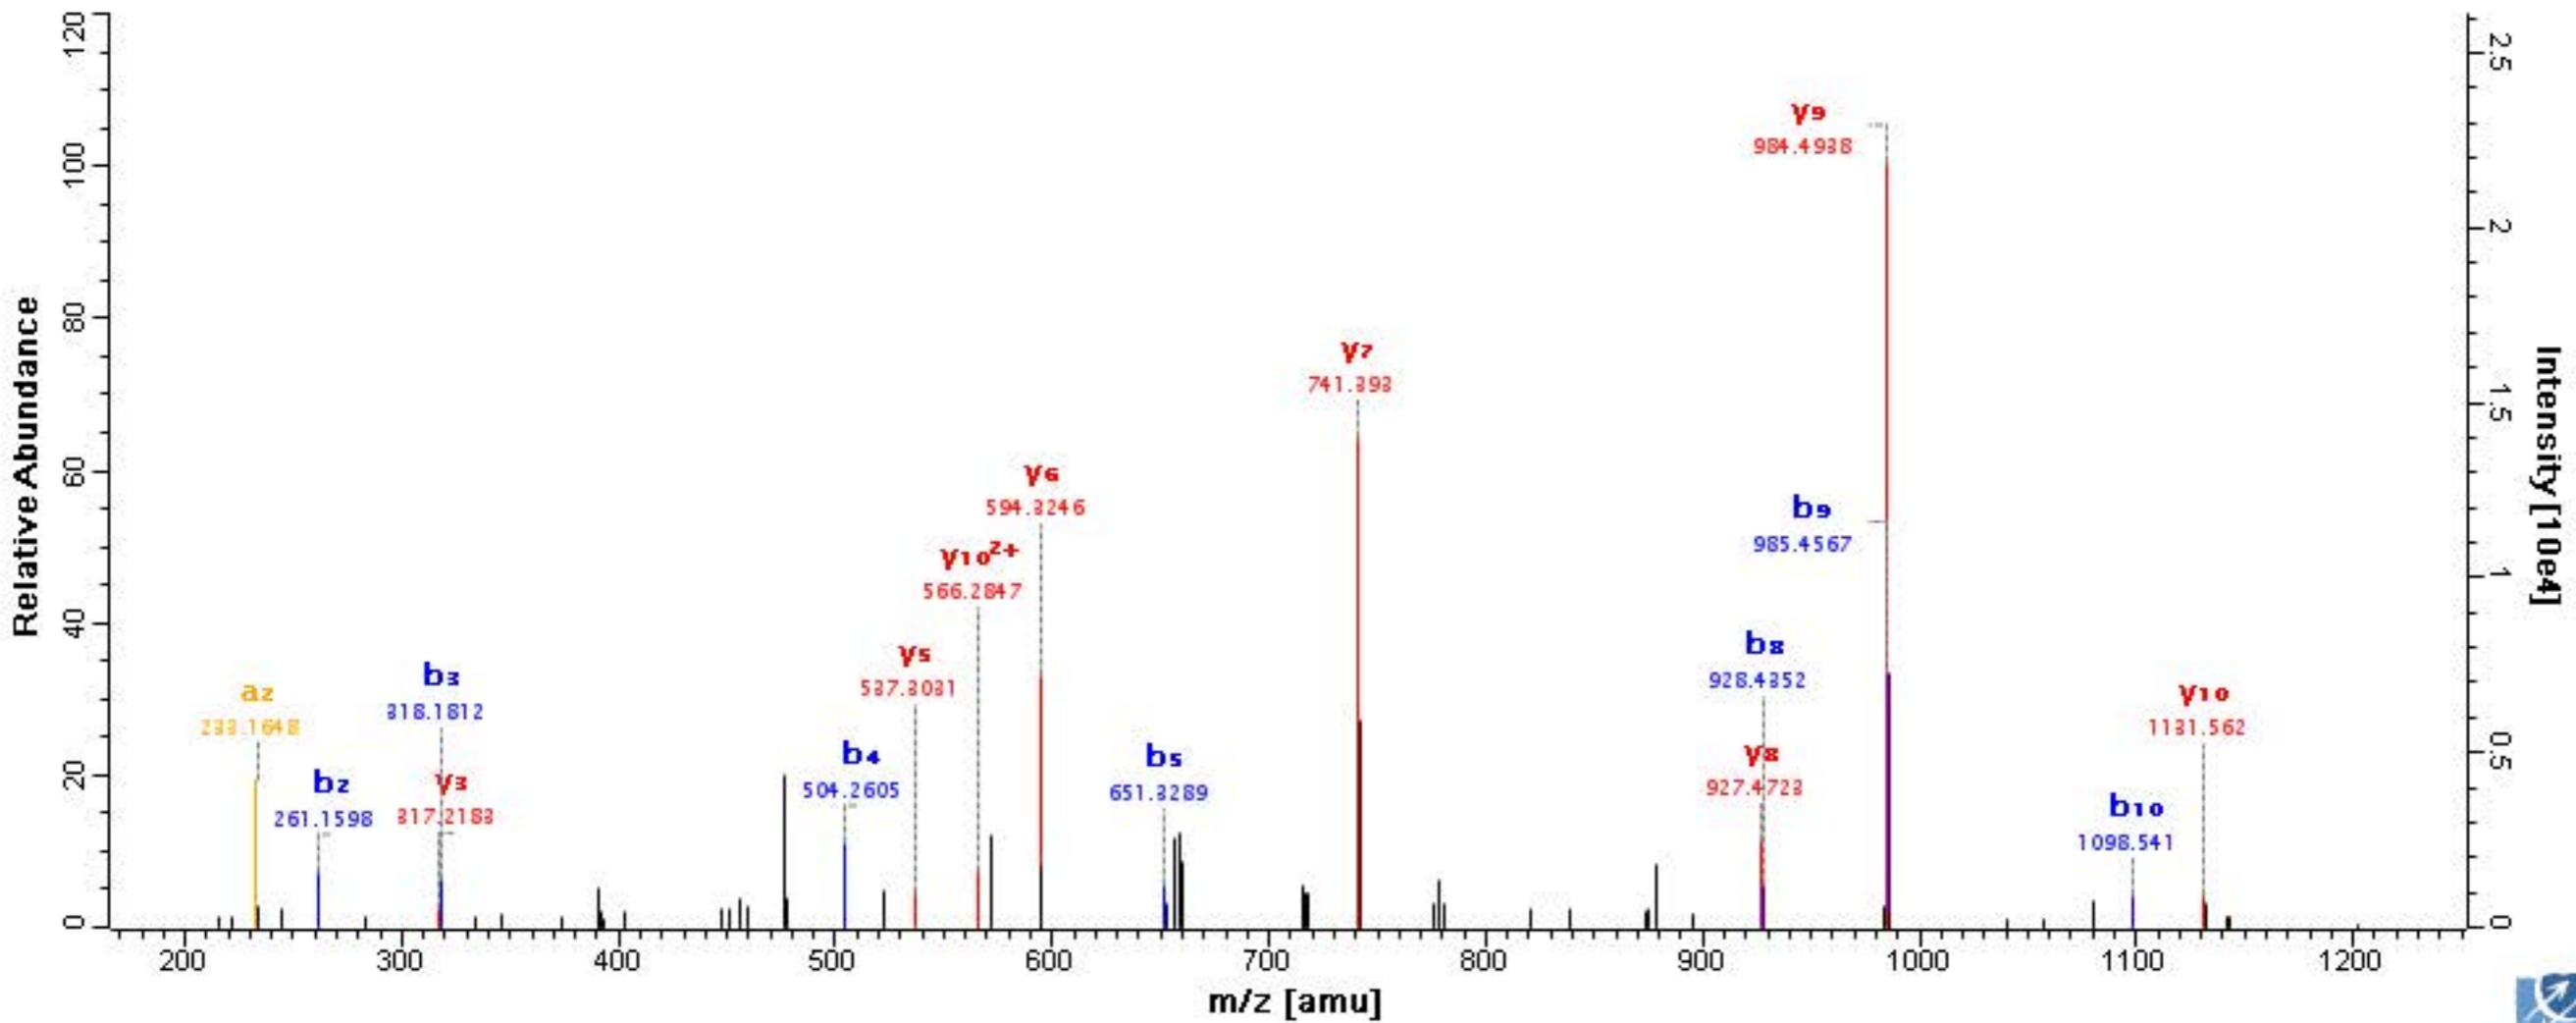

#### precursor information

|                   |                     |
|-------------------|---------------------|
| Mass:             | 1243.63844          |
| m/z:              | System.Collections. |
| Charge:           | System.Collections. |
| Retentiontime:    | System.Collections. |
| Score:            | 113.622             |
| Mass Error [ppm]: | -0.43291            |
| PEP:              | 0.00085182          |
| Precursor Type:   | MULTI               |

#### general information

|                       |           |
|-----------------------|-----------|
| Annotation:           | 9 of 11   |
| AminoAcids Coverag    | 82 %      |
| Intensity Coverage:   | 61 %      |
| Protein Localisation: | 25 ... 35 |

| a ion     |          | b ion     |          |    |     |    | y ion    |           | y <sup>2+</sup> ion |           |
|-----------|----------|-----------|----------|----|-----|----|----------|-----------|---------------------|-----------|
| Δ dalton  | mass     | Δ dalton  | mass     |    | seq |    | Δ dalton | mass      | Δ dalton            | mass      |
|           | 86.09643 |           | 114.0913 | 1  | I   | 10 |          |           |                     |           |
| -0.042769 | 233.1648 | -0.036707 | 261.1598 | 2  | F   | 9  | 1131.562 | -0.163633 | 566.2847            | +0.109248 |
|           | 290.1863 | +0.122249 | 318.1812 | 3  | G   | 8  | 984.4938 | +0.018062 | 984.4938            |           |
|           | 476.2656 | -0.041537 | 504.2605 | 4  | W   | 7  | 927.4723 | +0.028906 | 927.4723            |           |
|           | 623.334  | +0.023228 | 651.3289 | 5  | F   | 6  | 741.393  | +0.0434   | 741.393             |           |
|           | 680.3555 |           | 708.3504 | 6  | G   | 5  | 594.3246 | -0.015262 | 594.3246            |           |
|           | 737.377  |           | 765.3719 | 7  | G   | 4  | 537.3031 | -0.034264 | 537.3031            |           |
|           | 900.4403 | +0.184245 | 928.4352 | 8  | Y   | 3  | 480.2817 |           | 480.2817            |           |
|           | 957.4618 | +0.089722 | 985.4567 | 9  | G   | 2  | 317.2183 | +0.081229 | 317.2183            |           |
|           | 1070.546 | +0.073651 | 1098.541 | 10 | I   | 1  | 260.1969 |           | 260.1969            |           |
|           |          |           |          | 11 | K   | 0  | 147.1128 |           | 147.1128            |           |

Source: 20120510\_VR\_Bsu\_TripleSILACrep1\_T1L1T2\_OG\_F11  
 Scannumber: 28565  
 Protein: BSU26630; czcD; czcR; yrdQ  
 Peptide Score: 87.65  
 Method: ITMS; CID; 3

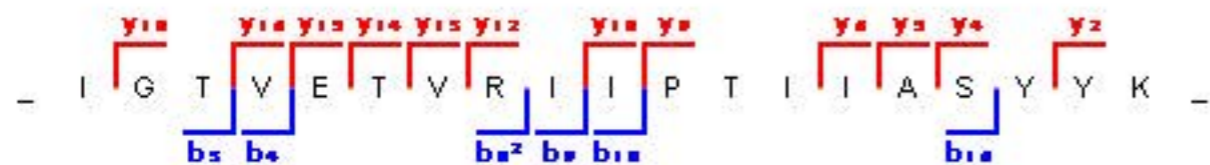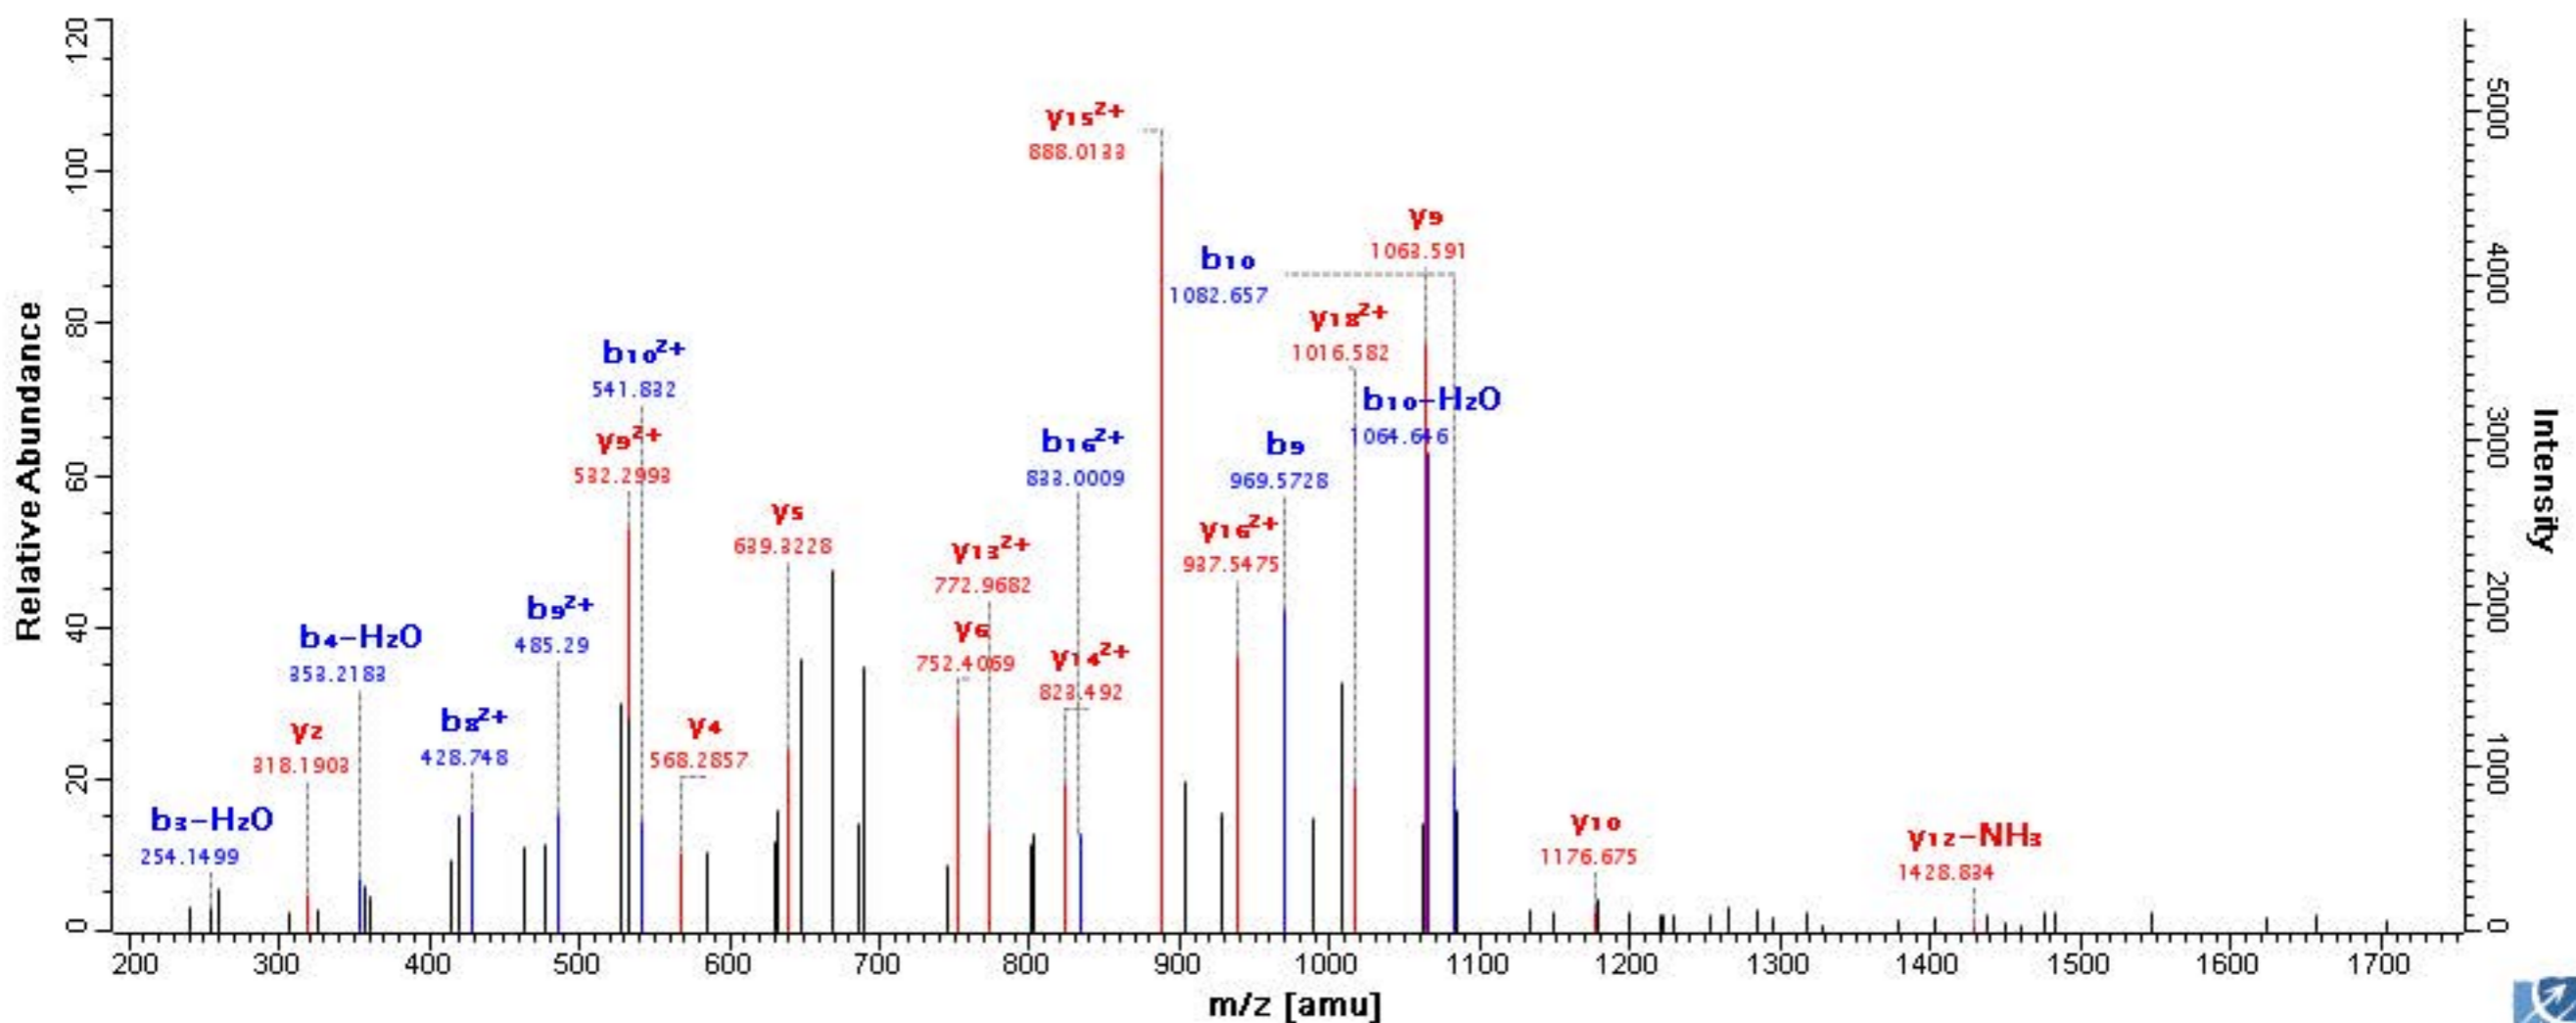

precursor information

|                   |                     |
|-------------------|---------------------|
| Mass:             | 2136.21952          |
| m/z:              | System.Collections. |
| Charge:           | System.Collections. |
| Retentiontime:    | System.Collections. |
| Score:            | 87.64727            |
| Mass Error [ppm]: | 0.035473            |
| PEP:              | 1.7273E-07          |
| Precursor Type:   | MULTI               |

| b <sup>2+</sup> ion |          | b ion     |          |     |   | y ion    |          | y <sup>2+</sup> ion |           |           |
|---------------------|----------|-----------|----------|-----|---|----------|----------|---------------------|-----------|-----------|
| Δ dalton            | mass     | Δ dalton  | mass     | seq |   | Δ dalton | mass     | Δ dalton            | mass      |           |
|                     | 114.0913 |           | 114.0913 | 1   | I | 18       |          |                     |           |           |
|                     | 171.1128 |           | 171.1128 | 2   | G | 17       | 2032.157 | 1016.582            | -0.163181 |           |
|                     | 272.1605 |           | 272.1605 | 3   | T | 16       | 1975.135 | 1975.135            |           |           |
|                     | 371.2289 |           | 371.2289 | 4   | V | 15       | 1874.088 | 937.5475            | +0.12133  |           |
|                     | 500.2715 |           | 500.2715 | 5   | E | 14       | 1775.019 | 888.0133            | +0.259418 |           |
|                     | 601.3192 |           | 601.3192 | 6   | T | 13       | 1645.977 | 823.492             | +0.085463 |           |
|                     | 700.3876 |           | 700.3876 | 7   | V | 12       | 1544.929 | 772.9682            | -0.050426 |           |
| +0.221284           | 428.748  |           | 856.4887 | 8   | R | 11       | 1445.861 | 1445.861            |           |           |
| +0.19326            | 485.29   | +0.023617 | 969.5728 | 9   | I | 10       | 1289.76  | 1289.76             |           |           |
| +0.33531            | 541.832  | -0.066367 | 1082.657 | 10  | I | 9        | 1176.675 | +0.316141           | 1176.675  |           |
|                     | 1179.71  |           | 1179.71  | 11  | P | 8        | 1063.591 | +0.005917           | 532.2993  | +0.057121 |
|                     | 1280.757 |           | 1280.757 | 12  | T | 7        | 966.5386 |                     | 966.5386  |           |
|                     | 1393.841 |           | 1393.841 | 13  | I | 6        | 865.4909 |                     | 865.4909  |           |
|                     | 1506.925 |           | 1506.925 | 14  | I | 5        | 752.4069 | +0.022821           | 752.4069  |           |
|                     | 1577.963 |           | 1577.963 | 15  | A | 4        | 639.3228 | +0.15254            | 639.3228  |           |
| +0.234813           | 833.0009 |           | 1664.995 | 16  | S | 3        | 568.2857 | +0.142046           | 568.2857  |           |
|                     | 1828.058 |           | 1828.058 | 17  | Y | 2        | 481.2537 |                     | 481.2537  |           |
|                     | 1991.121 |           | 1991.121 | 18  | Y | 1        | 318.1903 | +0.180884           | 318.1903  |           |
|                     |          |           |          | 19  | K | 0        | 155.127  |                     | 155.127   |           |

general information

|                       |            |
|-----------------------|------------|
| Annotation:           | 14 of 19   |
| AminoAcids Coverag    | 74%        |
| Intensity Coverage:   | 53%        |
| Protein Localisation: | 94 ... 112 |

Source: 20120510\_VR\_Bsu\_TripleSILACrep1\_T1L1T2\_OG\_F11  
 Scannumber: 29226  
 Protein: BSU11120; yitT; yuxA  
 Peptide Score: 56.87  
 Method: ITMS; CID; 3

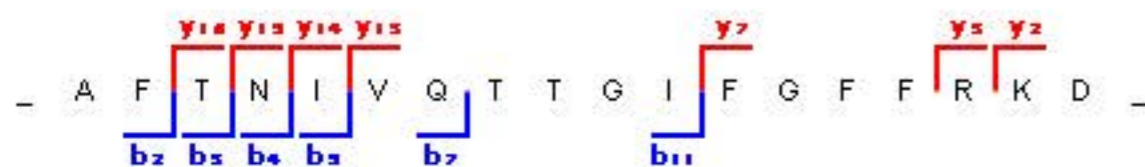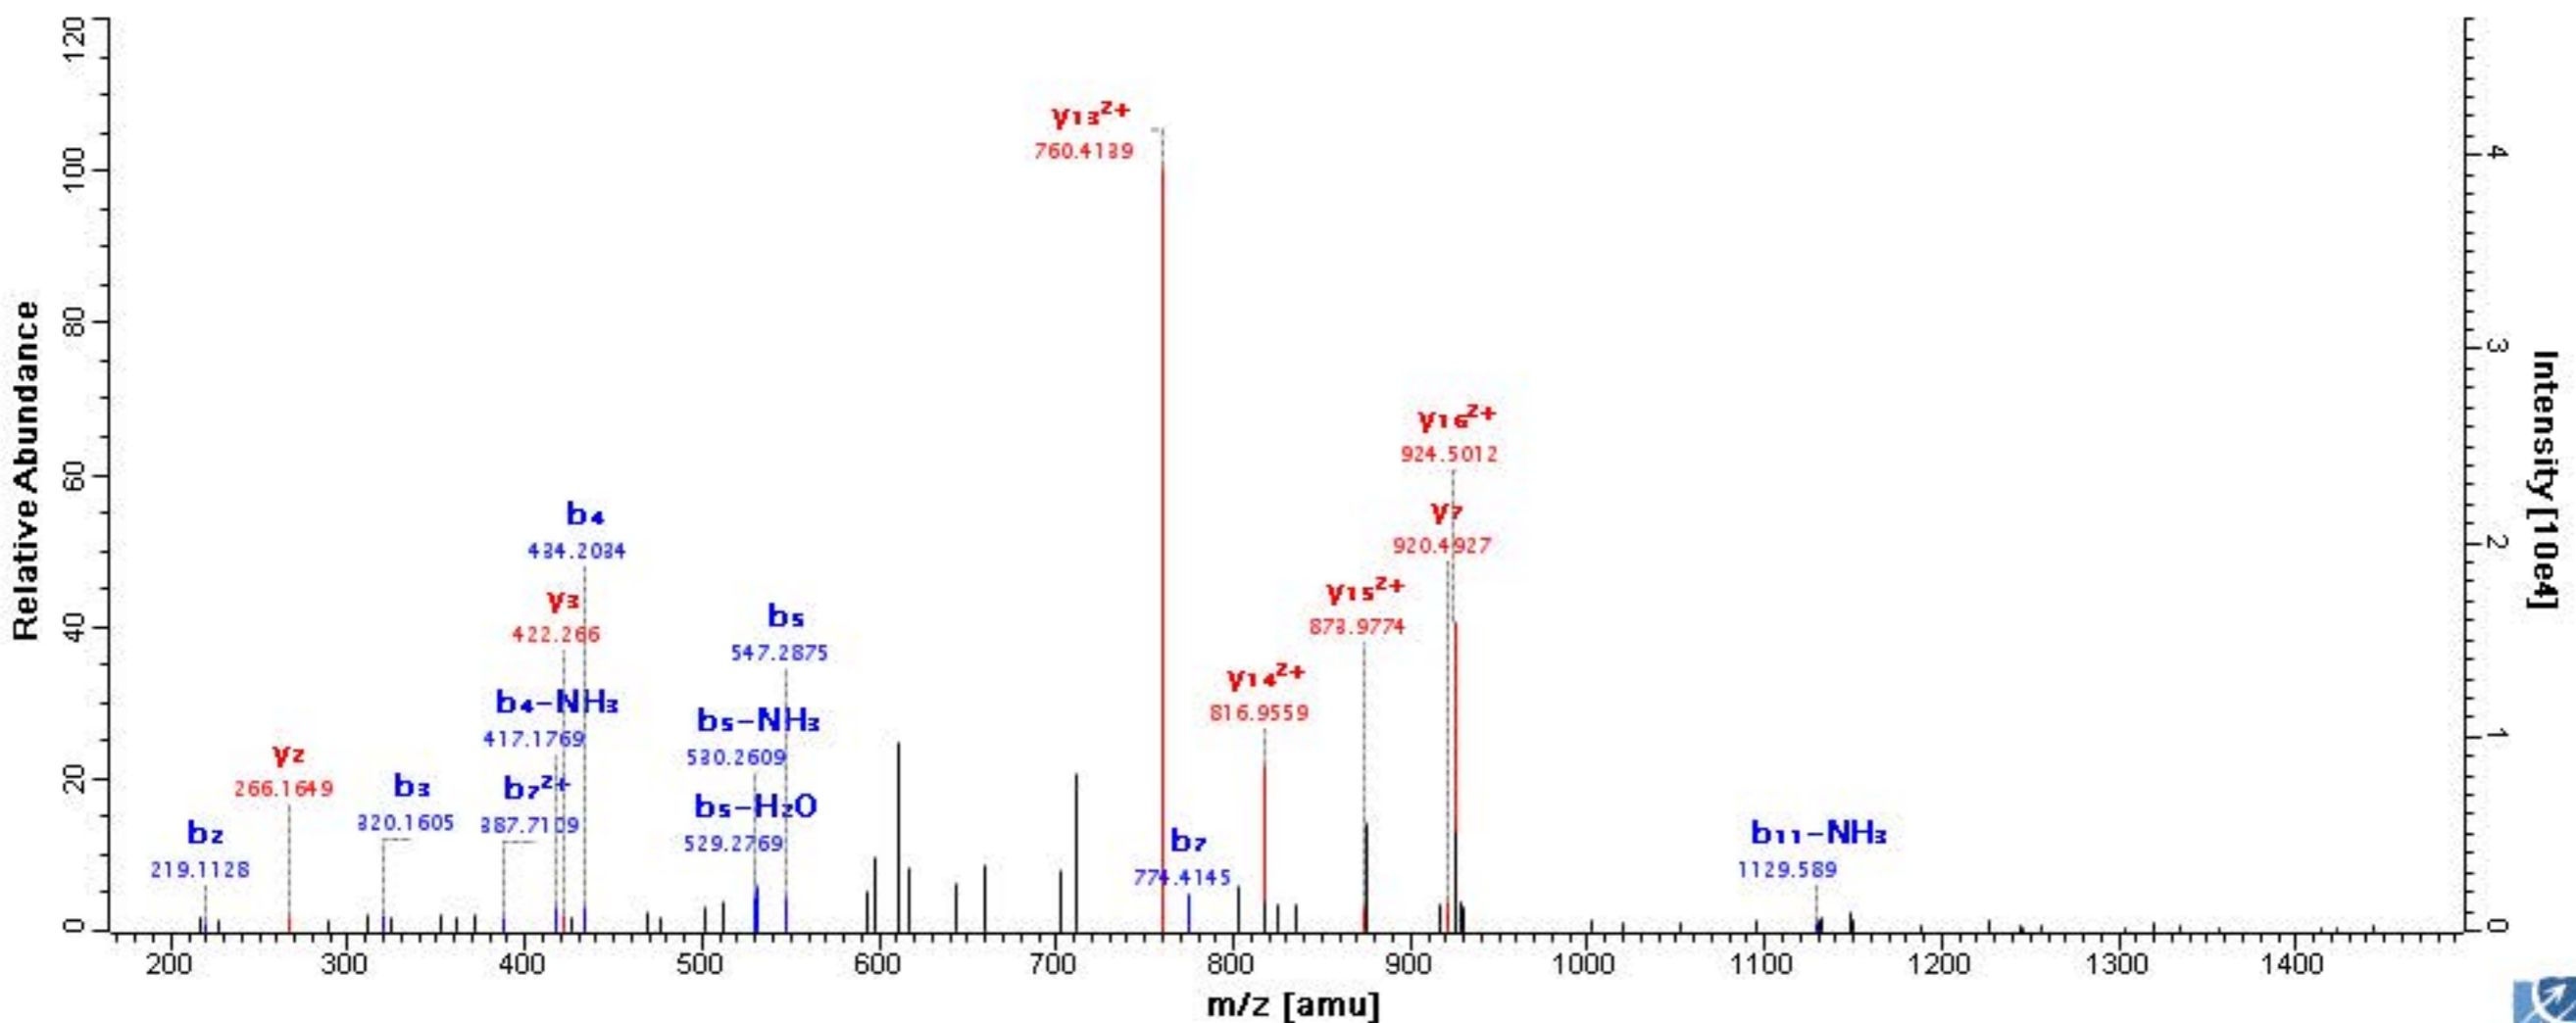

#### precursor information

|                   |                     |
|-------------------|---------------------|
| Mass:             | 2065.09639          |
| m/z:              | System.Collections. |
| Charge:           | System.Collections. |
| Retentiontime:    | System.Collections. |
| Score:            | 56.87172            |
| Mass Error [ppm]: | 1.4136              |
| PEP:              | 0.13509             |
| Precursor Type:   | ISO                 |

#### general information

|                       |             |
|-----------------------|-------------|
| Annotation:           | 11 of 18    |
| AminoAcids Coverage:  | 61 %        |
| Intensity Coverage:   | 48 %        |
| Protein Localisation: | 263 ... 280 |

| b <sup>2+</sup> ion |          | b ion     |          |    |     |    | γ ion    |           | γ <sup>2+</sup> ion |           |
|---------------------|----------|-----------|----------|----|-----|----|----------|-----------|---------------------|-----------|
| Δ dalton            | mass     | Δ dalton  | mass     |    | seq |    | Δ dalton | mass      | Δ dalton            | mass      |
|                     | 72.04439 |           | 72.04439 | 1  | A   | 17 |          |           |                     |           |
|                     | 219.1128 | +0.052967 | 219.1128 | 2  | F   | 16 | 1995.064 |           | 1995.064            |           |
|                     | 320.1605 | +0.069589 | 320.1605 | 3  | T   | 15 | 1847.995 |           | 924.5012            | +0.258031 |
|                     | 434.2034 | +0.063008 | 434.2034 | 4  | N   | 14 | 1746.948 |           | 873.9774            | -0.216604 |
|                     | 547.2875 | +0.23578  | 547.2875 | 5  | I   | 13 | 1632.905 |           | 816.9559            | +0.378163 |
|                     | 646.3559 |           | 646.3559 | 6  | V   | 12 | 1519.821 |           | 760.4139            | +0.357695 |
| -0.103297           | 387.7109 | +0.359399 | 774.4145 | 7  | Q   | 11 | 1420.752 |           | 1420.752            |           |
|                     | 875.4621 |           | 875.4621 | 8  | T   | 10 | 1292.694 |           | 1292.694            |           |
|                     | 976.5098 |           | 976.5098 | 9  | T   | 9  | 1191.646 |           | 1191.646            |           |
|                     | 1033.531 |           | 1033.531 | 10 | G   | 8  | 1090.598 |           | 1090.598            |           |
|                     | 1146.615 |           | 1146.615 | 11 | I   | 7  | 1033.577 |           | 1033.577            |           |
|                     | 1293.684 |           | 1293.684 | 12 | F   | 6  | 920.4927 | -0.00677  | 920.4927            |           |
|                     | 1350.705 |           | 1350.705 | 13 | G   | 5  | 773.4243 |           | 773.4243            |           |
|                     | 1497.774 |           | 1497.774 | 14 | F   | 4  | 716.4028 |           | 716.4028            |           |
|                     | 1644.842 |           | 1644.842 | 15 | F   | 3  | 569.3344 |           | 569.3344            |           |
|                     | 1800.943 |           | 1800.943 | 16 | R   | 2  | 422.266  | +0.126369 | 422.266             |           |
|                     | 1933.063 |           | 1933.063 | 17 | K   | 1  | 266.1649 | +0.101686 | 266.1649            |           |
|                     |          |           |          | 18 | D   | 0  | 134.0448 |           | 134.0448            |           |

Source: 20120510\_VR\_Bsu\_TripleSILACrep1\_T1L1T2\_OG\_F11  
 Scannumber: 29536  
 Protein: BSU16980; spoV5  
 Peptide Score: 40.84  
 Method: ITMS; CID; 3

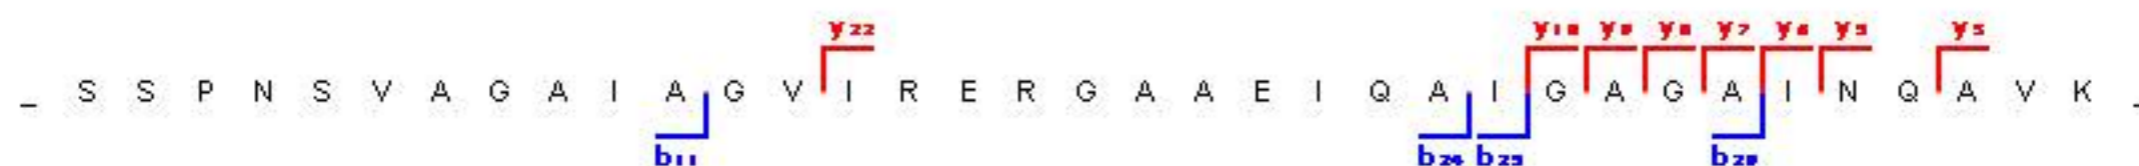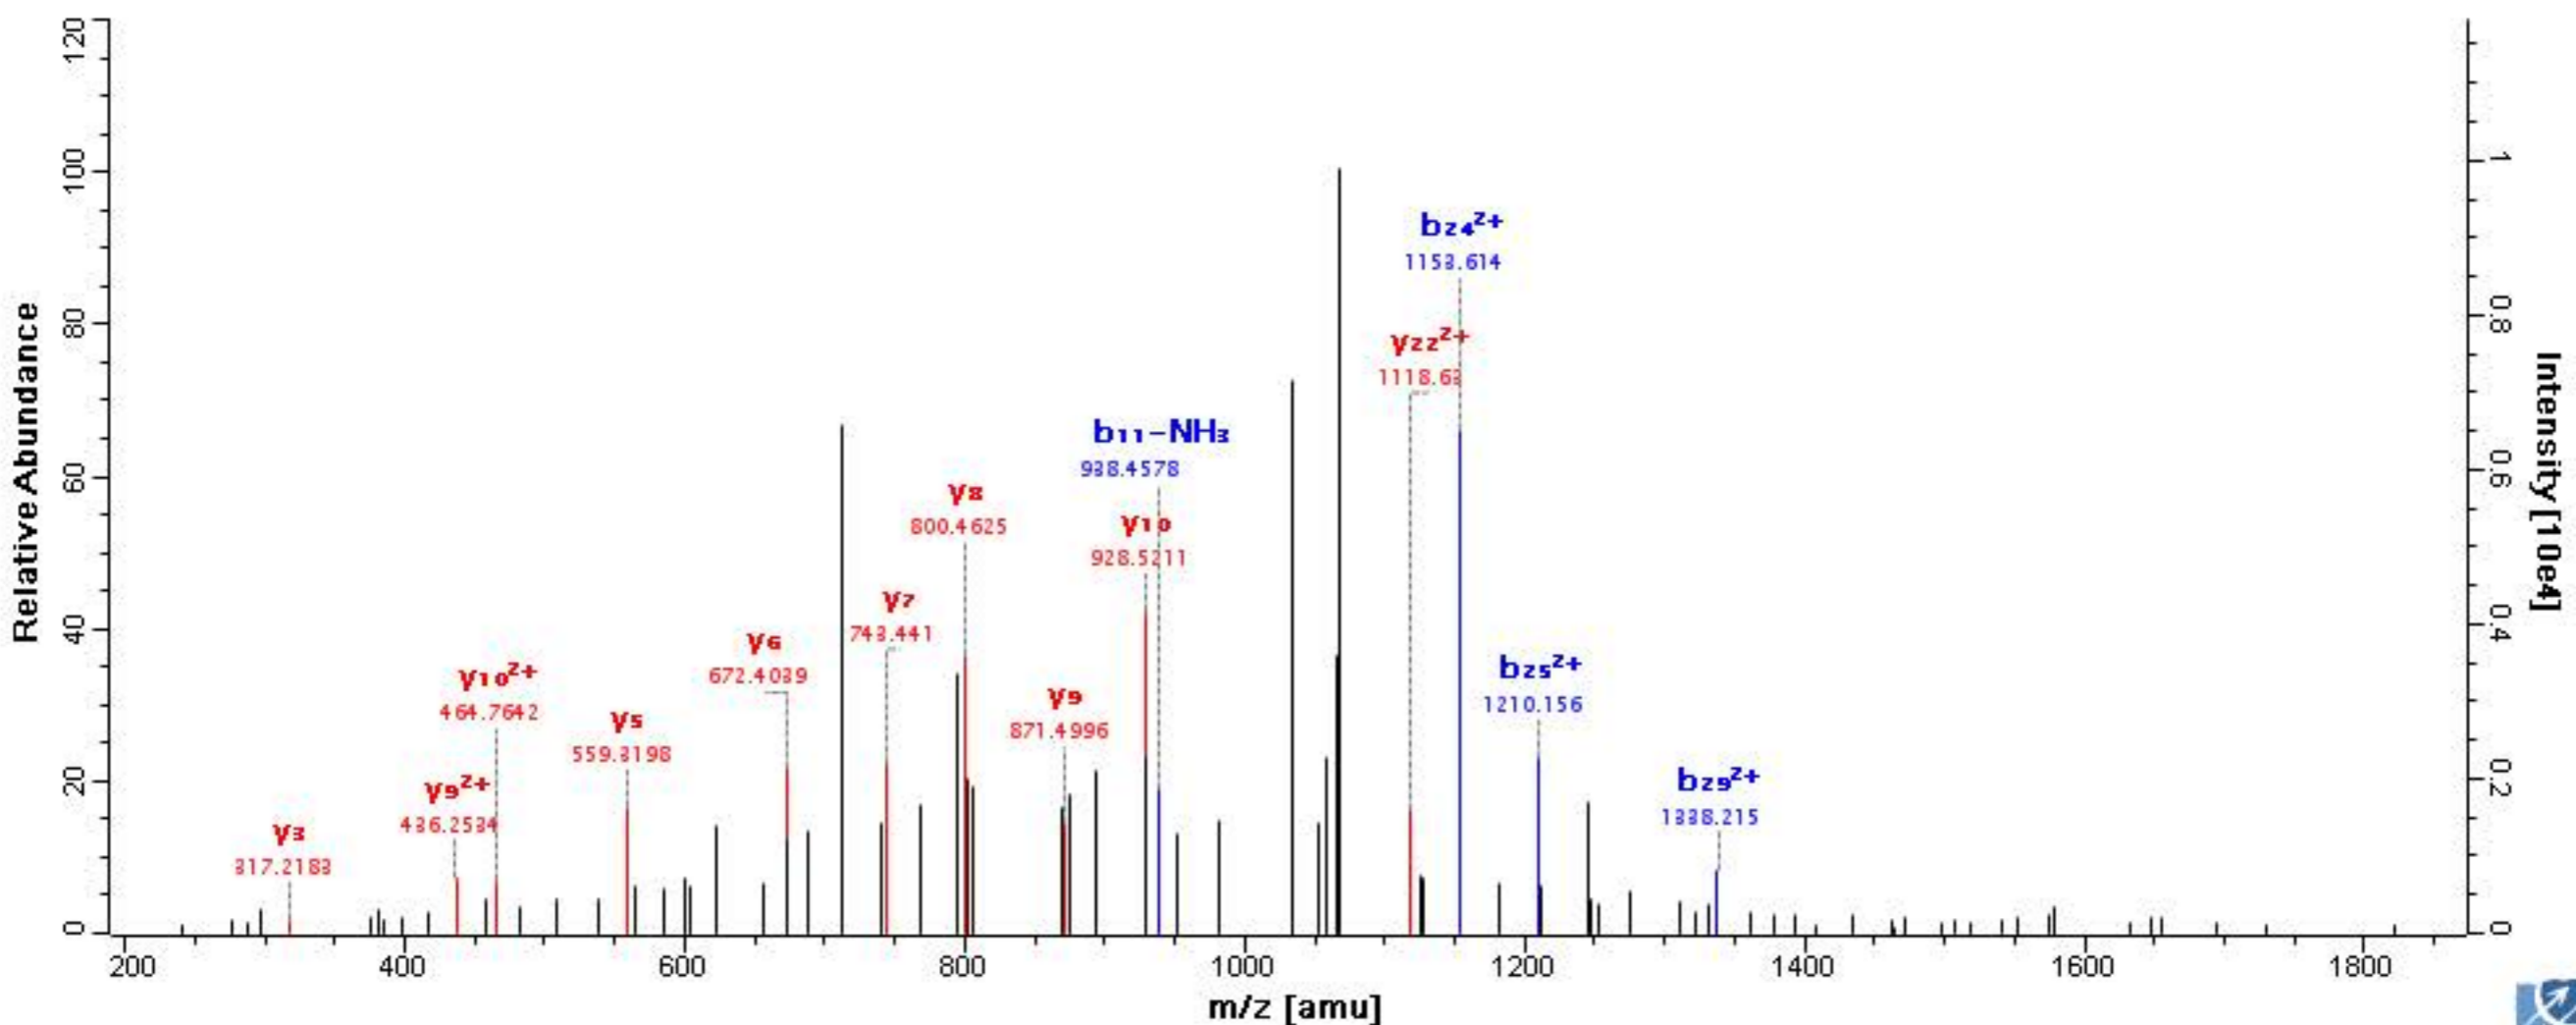

precursor information

|                   |                     |
|-------------------|---------------------|
| Mass:             | 3345.8147           |
| m/z:              | System.Collections. |
| Charge:           | System.Collections. |
| Retentiontime:    | System.Collections. |
| Score:            | 40.83715            |
| Mass Error [ppm]: | 0.89719             |
| PEP:              | 0.00075562          |
| Precursor Type:   | MULTI               |

| b <sup>2+</sup> ion |          | b ion    |      |     | y ion |          | y <sup>2+</sup> ion |           |                    |
|---------------------|----------|----------|------|-----|-------|----------|---------------------|-----------|--------------------|
| Δ dalton            | mass     | Δ dalton | mass | seq |       | Δ dalton | mass                | Δ dalton  | mass               |
|                     | 88.0393  | 88.0393  |      | 1   | S     | 34       |                     |           |                    |
|                     | 175.0713 | 175.0713 |      | 2   | S     | 33       | 3259.787            |           | 3259.787           |
|                     | 272.1241 | 272.1241 |      | 3   | P     | 32       | 3172.755            |           | 3172.755           |
|                     | 386.167  | 386.167  |      | 4   | N     | 31       | 3075.702            |           | 3075.702           |
|                     | 473.1991 | 473.1991 |      | 5   | S     | 30       | 2961.659            |           | 2961.659           |
|                     | 572.2675 | 572.2675 |      | 6   | V     | 29       | 2874.627            |           | 2874.627           |
|                     | 643.3046 | 643.3046 |      | 7   | A     | 28       | 2775.559            |           | 2775.559           |
|                     | 700.326  | 700.326  |      | 8   | G     | 27       | 2704.522            |           | 2704.522           |
|                     | 771.3632 | 771.3632 |      | 9   | A     | 26       | 2647.5              |           | 2647.5             |
|                     | 884.4472 | 884.4472 |      | 10  | I     | 25       | 2576.463            |           | 2576.463           |
|                     | 955.4843 | 955.4843 |      | 11  | A     | 24       | 2463.379            |           | 2463.379           |
|                     | 1012.506 | 1012.506 |      | 12  | G     | 23       | 2392.342            |           | 2392.342           |
|                     | 1111.574 | 1111.574 |      | 13  | V     | 22       | 2335.32             |           | 2335.32            |
|                     | 1224.658 | 1224.658 |      | 14  | I     | 21       | 2236.252            |           | 1118.63 -0.187641  |
|                     | 1380.759 | 1380.759 |      | 15  | R     | 20       | 2123.168            |           | 2123.168           |
|                     | 1509.802 | 1509.802 |      | 16  | E     | 19       | 1967.067            |           | 1967.067           |
|                     | 1665.903 | 1665.903 |      | 17  | R     | 18       | 1838.024            |           | 1838.024           |
|                     | 1722.925 | 1722.925 |      | 18  | G     | 17       | 1681.923            |           | 1681.923           |
|                     | 1793.962 | 1793.962 |      | 19  | A     | 16       | 1624.902            |           | 1624.902           |
|                     | 1864.999 | 1864.999 |      | 20  | A     | 15       | 1553.865            |           | 1553.865           |
|                     | 1994.041 | 1994.041 |      | 21  | E     | 14       | 1482.827            |           | 1482.827           |
|                     | 2107.125 | 2107.125 |      | 22  | I     | 13       | 1353.785            |           | 1353.785           |
|                     | 2235.184 | 2235.184 |      | 23  | Q     | 12       | 1240.701            |           | 1240.701           |
| +0.240654           | 1153.614 | 2306.221 |      | 24  | A     | 11       | 1112.642            |           | 1112.642           |
| +0.206923           | 1210.156 | 2419.305 |      | 25  | I     | 10       | 1041.605            |           | 1041.605           |
|                     | 2476.327 | 2476.327 |      | 26  | G     | 9        | 928.5211            | -0.003539 | 464.7642 +0.021417 |
|                     | 2547.364 | 2547.364 |      | 27  | A     | 8        | 871.4996            | +0.123699 | 436.2534 +0.260787 |
|                     | 2604.385 | 2604.385 |      | 28  | G     | 7        | 800.4625            | +0.019638 | 800.4625           |
| -0.239716           | 1338.215 | 2675.422 |      | 29  | A     | 6        | 743.441             | +0.13827  | 743.441            |
|                     | 2788.506 | 2788.506 |      | 30  | I     | 5        | 672.4039            | +0.165557 | 672.4039           |
|                     | 2902.549 | 2902.549 |      | 31  | N     | 4        | 559.3198            | +0.15697  | 559.3198           |
|                     | 3030.608 | 3030.608 |      | 32  | Q     | 3        | 445.2769            |           | 445.2769           |
|                     | 3101.645 | 3101.645 |      | 33  | A     | 2        | 317.2183            | +0.115408 | 317.2183           |
|                     | 3200.713 | 3200.713 |      | 34  | V     | 1        | 246.1812            |           | 246.1812           |
|                     |          |          |      | 35  | K     | 0        | 147.1128            |           | 147.1128           |

general information

|                       |           |
|-----------------------|-----------|
| Annotation:           | 12 of 35  |
| AminoAcids Coverag    | 34 %      |
| Intensity Coverage:   | 28 %      |
| Protein Localisation: | 10 ... 44 |

Source: 20120510\_VR\_Bsu\_TripleSILACrep1\_T1L1T2\_OG\_F12b  
 Scannumber: 18552  
 Protein: BSU38900;  $\gamma$ xjM  
 Peptide Score: 102.52  
 Method: ITMS; CID; 3

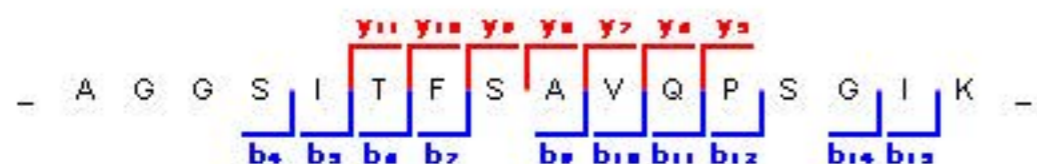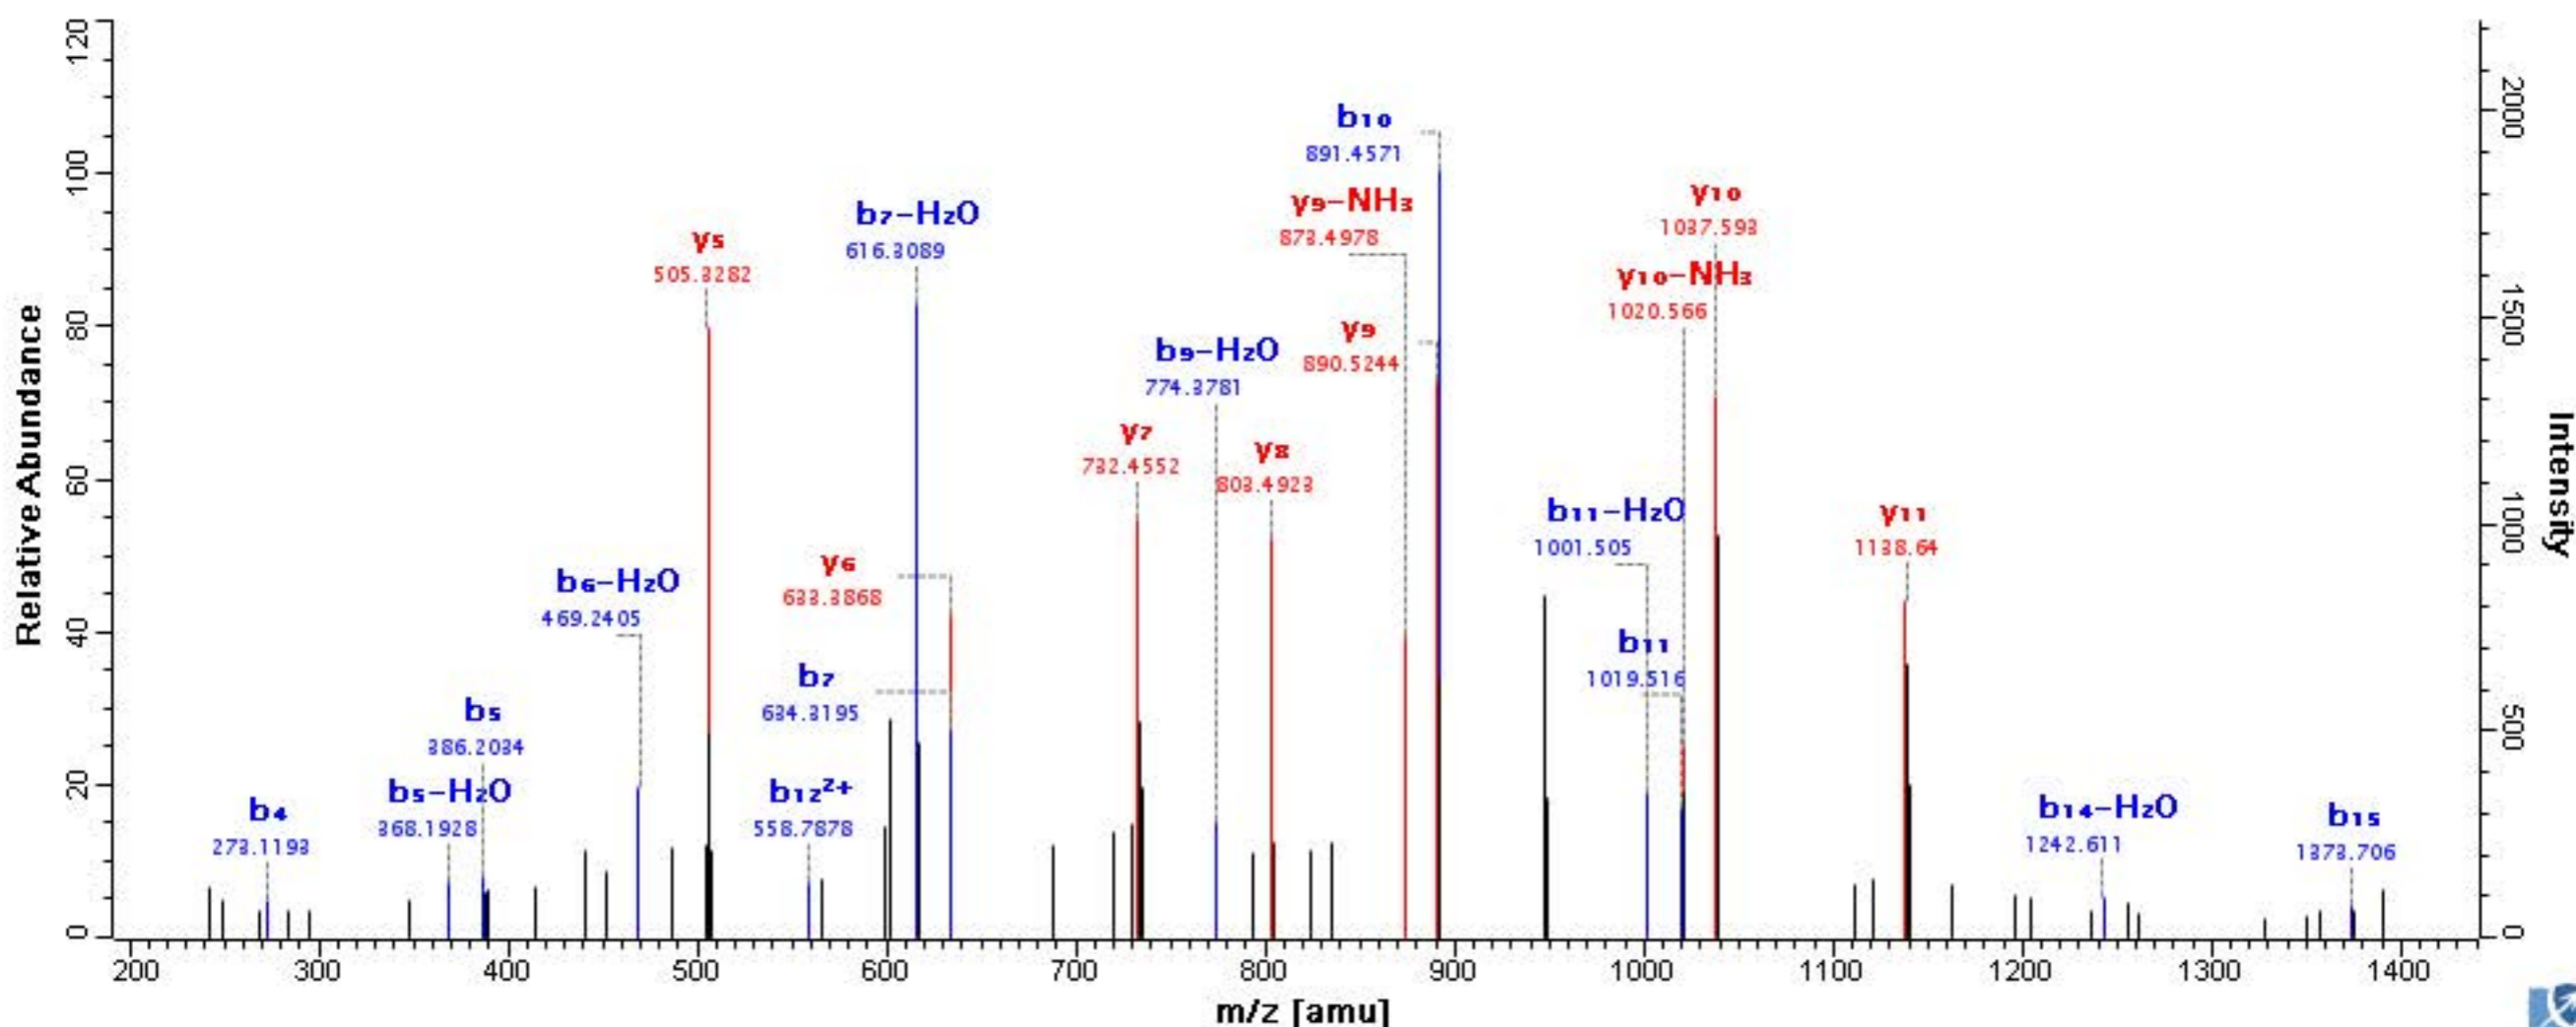

#### precursor information

|                   |                     |
|-------------------|---------------------|
| Mass:             | 0                   |
| m/z:              | System.Collections. |
| Charge:           | System.Collections. |
| Retentiontime:    | System.Collections. |
| Score:            | 102.52              |
| Mass Error [ppm]: | -1.6103             |
| PEP:              | 5.5357E-09          |
| Precursor Type:   | PEAK                |

| b <sup>2+</sup> ion |              | b ion           |              |    |     |    | y ion           |            |
|---------------------|--------------|-----------------|--------------|----|-----|----|-----------------|------------|
| $\Delta$ dalton     | mass         | $\Delta$ dalton | mass         |    | seq |    | $\Delta$ dalton | mass       |
|                     | 72.044390254 |                 | 72.044390254 | 1  | A   | 15 |                 |            |
|                     | 129.06585398 |                 | 129.06585398 | 2  | G   | 14 | 1452.799477     |            |
|                     | 186.0873177  |                 | 186.0873177  | 3  | G   | 13 | 1395.7780132    |            |
|                     | 273.11934611 | -0.0003886      | 273.11934611 | 4  | S   | 12 | 1338.7565495    |            |
|                     | 386.20341009 | -0.0077924      | 386.20341009 | 5  | I   | 11 | 1251.7245211    |            |
|                     | 487.25108857 |                 | 487.25108857 | 6  | T   | 10 | 1138.6404571    | -0.112503  |
|                     | 634.31950248 | +0.0766157      | 634.31950248 | 7  | F   | 9  | 1037.5927787    | -0.0401664 |
|                     | 721.35153089 |                 | 721.35153089 | 8  | S   | 8  | 890.52436475    | -0.0479854 |
|                     | 792.38864468 |                 | 792.38864468 | 9  | A   | 7  | 803.49233634    | -0.0763817 |
|                     | 891.4570586  | -0.0248687      | 891.4570586  | 10 | V   | 6  | 732.45522255    | -0.0261454 |
|                     | 1019.5156361 | +0.2375377      | 1019.5156361 | 11 | Q   | 5  | 633.38680863    | -0.0989668 |
| +0.4293859          | 558.78783821 |                 | 1116.5684    | 12 | P   | 4  | 505.32823112    | +0.2027747 |
|                     | 1203.6004284 |                 | 1203.6004284 | 13 | S   | 3  | 408.27546727    |            |
|                     | 1260.6218921 |                 | 1260.6218921 | 14 | G   | 2  | 321.24343886    |            |
|                     | 1373.7059561 | +0.3823008      | 1373.7059561 | 15 | I   | 1  | 264.22197513    |            |
|                     |              |                 |              | 16 | K   | 0  | 151.13791115    |            |

#### general information

|                       |             |
|-----------------------|-------------|
| Annotation:           | 11 of 16    |
| AminoAcids Coverag    | 69 %        |
| Intensity Coverage:   | 56 %        |
| Protein Localisation: | 372 ... 387 |

Source: 20120510\_VR\_Bsu\_TripleSILACrep1\_T1L1T2\_OG\_F12b  
 Scannumber: 19900  
 Protein: BSU18050; yneQ  
 Peptide Score: 115.78  
 Method: ITMS; CID; 3

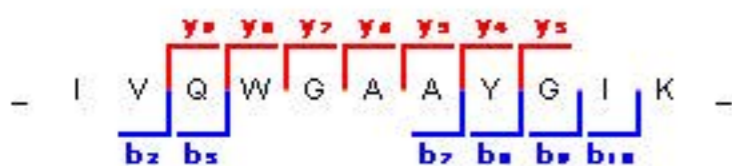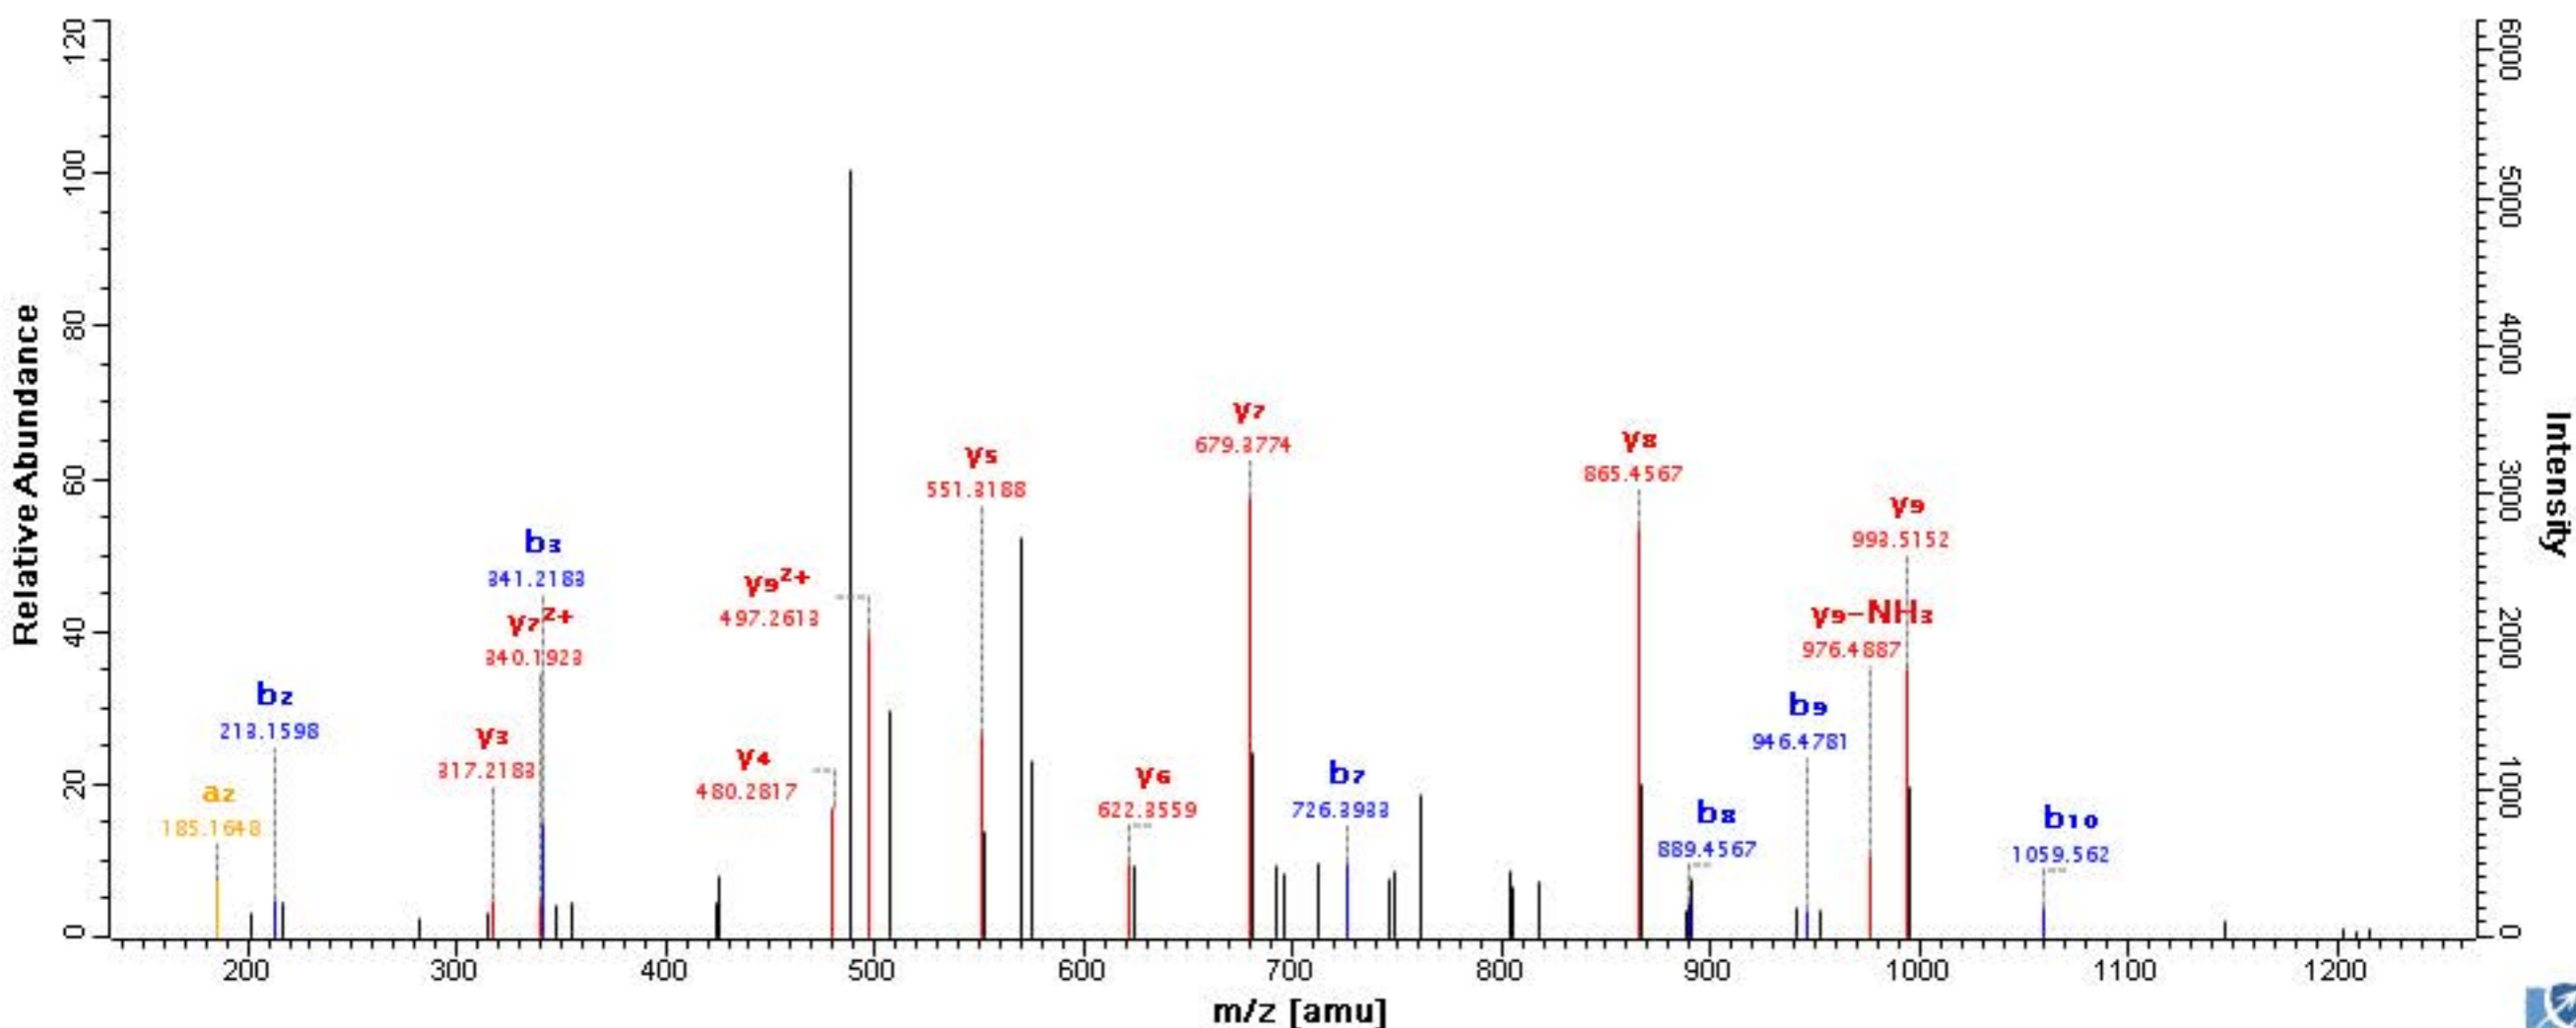

#### precursor information

|                   |                     |
|-------------------|---------------------|
| Mass:             | 1204.66075          |
| m/z:              | System.Collections. |
| Charge:           | System.Collections. |
| Retentiontime:    | System.Collections. |
| Score:            | 115.7813            |
| Mass Error [ppm]: | 0.25114             |
| PEP:              | 1.0225E-05          |
| Precursor Type:   | ISO                 |

#### general information

|                       |           |
|-----------------------|-----------|
| Annotation:           | 9 of 11   |
| AminoAcids Coverage:  | 82 %      |
| Intensity Coverage:   | 42 %      |
| Protein Localisation: | 51 ... 61 |

| a ion     |          | b ion     |          |    |     |    | y ion    |           | y <sup>2+</sup> ion |           |
|-----------|----------|-----------|----------|----|-----|----|----------|-----------|---------------------|-----------|
| Δ dalton  | mass     | Δ dalton  | mass     |    | seq |    | Δ dalton | mass      | Δ dalton            | mass      |
|           | 86.09643 |           | 114.0913 | 1  | I   | 10 |          |           |                     |           |
| -0.110579 | 185.1648 | +0.042791 | 213.1598 | 2  | V   | 9  | 1092.584 |           | 1092.584            |           |
|           | 313.2234 | +0.171439 | 341.2183 | 3  | Q   | 8  | 993.5152 | -0.048506 | 497.2613            | +0.160127 |
|           | 499.3027 |           | 527.2976 | 4  | W   | 7  | 865.4567 | -0.022827 | 865.4567            |           |
|           | 556.3242 |           | 584.3191 | 5  | G   | 6  | 679.3774 | -0.008699 | 340.1923            | +0.135353 |
|           | 627.3613 |           | 655.3562 | 6  | A   | 5  | 622.3559 | -0.10308  | 622.3559            |           |
|           | 698.3984 | -0.092494 | 726.3933 | 7  | A   | 4  | 551.3188 | +0.092786 | 551.3188            |           |
|           | 861.4618 | -0.061462 | 889.4567 | 8  | Y   | 3  | 480.2817 | -0.100203 | 480.2817            |           |
|           | 918.4832 | +0.206869 | 946.4781 | 9  | G   | 2  | 317.2183 | -0.112802 | 317.2183            |           |
|           | 1031.567 | -0.085264 | 1059.562 | 10 | I   | 1  | 260.1969 |           | 260.1969            |           |
|           |          |           |          | 11 | K   | 0  | 147.1128 |           | 147.1128            |           |

Source: 20120510\_VR\_Bsu\_TripleSILACrep1\_T1L1T2\_OG\_F12b  
 Scannumber: 20399  
 Protein: B65E; BSU39650; yxdK  
 Peptide Score: 97.73  
 Method: ITMS; CID; 3

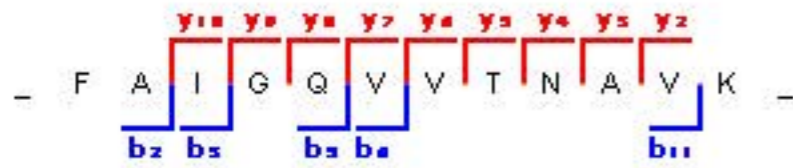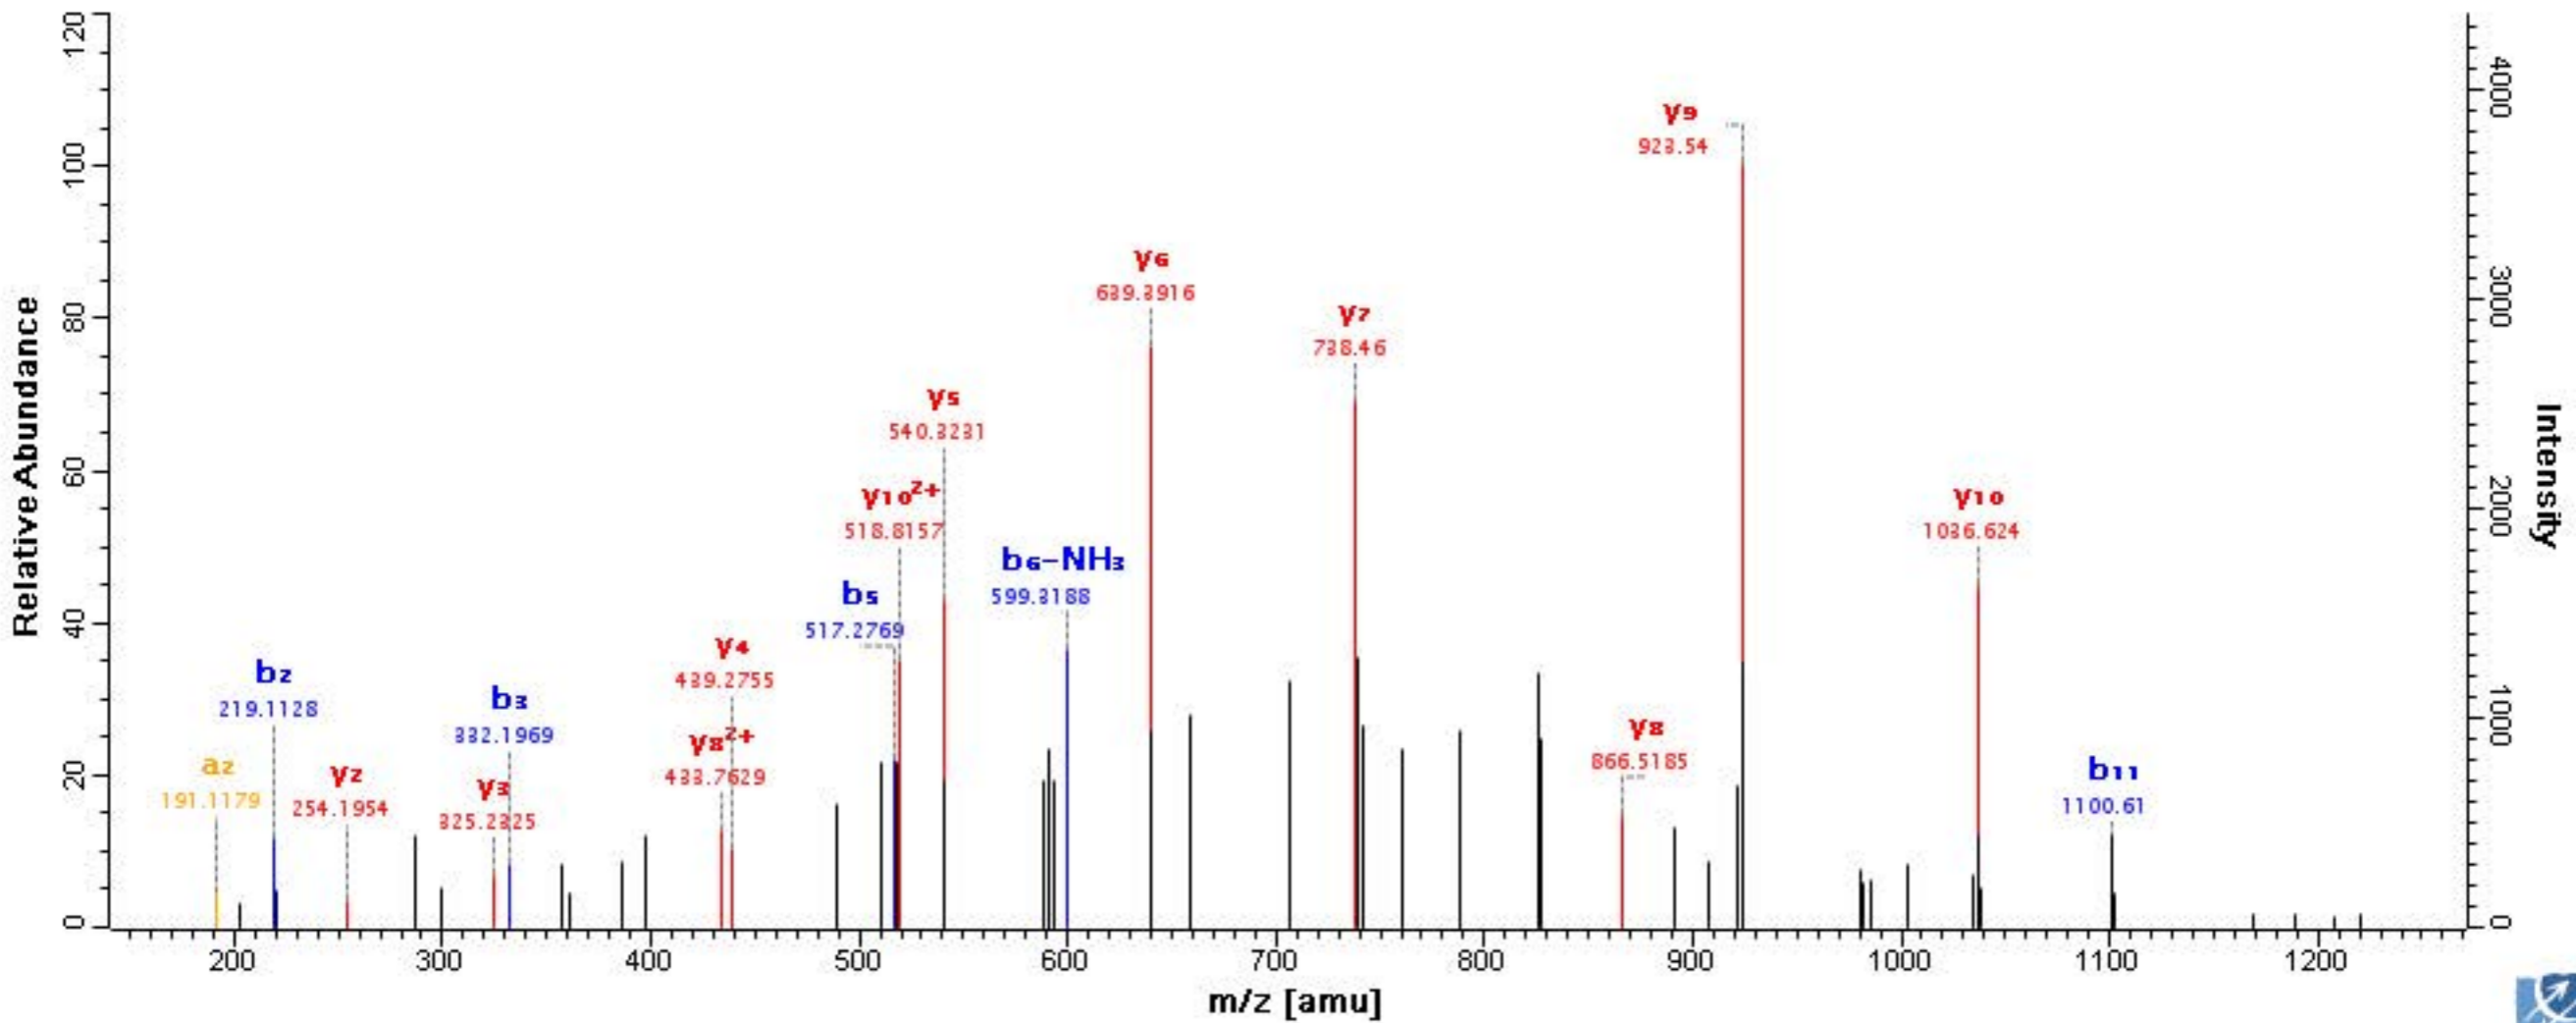

**precursor information**

|                   |                     |
|-------------------|---------------------|
| Mass:             | 0                   |
| m/z:              | System.Collections. |
| Charge:           | System.Collections. |
| Retentiontime:    | System.Collections. |
| Score:            | 97.73378            |
| Mass Error [ppm]: | -0.39056            |
| PEP:              | 0.00049104          |
| Precursor Type:   | PEAK                |

**general information**

|                       |             |
|-----------------------|-------------|
| Annotation:           | 10 of 12    |
| AminoAcids Coverag    | 83 %        |
| Intensity Coverage:   | 45 %        |
| Protein Localisation: | 220 ... 231 |

| a ion     |          | b ion     |          | seq |   |    | y ion    |           | y <sup>2+</sup> ion |           |
|-----------|----------|-----------|----------|-----|---|----|----------|-----------|---------------------|-----------|
| Δ dalton  | mass     | Δ dalton  | mass     |     |   |    | Δ dalton | mass      | Δ dalton            | mass      |
|           | 120.0808 |           | 148.0757 | 1   | F | 11 |          |           |                     |           |
| +0.034012 | 191.1179 | +0.09055  | 219.1128 | 2   | A | 10 | 1107.661 |           | 1107.661            |           |
|           | 304.202  | -0.068206 | 332.1969 | 3   | I | 9  | 1036.624 | +0.034256 | 518.8157            | +0.12494  |
|           | 361.2234 |           | 389.2183 | 4   | G | 8  | 923.54   | -0.004849 | 923.54              |           |
|           | 489.282  | +0.138374 | 517.2769 | 5   | Q | 7  | 866.5185 | +0.012342 | 433.7629            | -0.035736 |
|           | 588.3504 |           | 616.3453 | 6   | V | 6  | 738.46   | +0.070492 | 738.46              |           |
|           | 687.4188 |           | 715.4137 | 7   | V | 5  | 639.3916 | -0.014597 | 639.3916            |           |
|           | 788.4665 |           | 816.4614 | 8   | T | 4  | 540.3231 | +0.00743  | 540.3231            |           |
|           | 902.5094 |           | 930.5043 | 9   | N | 3  | 439.2755 | +0.170465 | 439.2755            |           |
|           | 973.5465 |           | 1001.541 | 10  | A | 2  | 325.2325 | -0.103808 | 325.2325            |           |
|           | 1072.615 | +0.061394 | 1100.61  | 11  | V | 1  | 254.1954 | +0.120165 | 254.1954            |           |
|           |          |           |          | 12  | K | 0  | 155.127  |           | 155.127             |           |

Source: 20120510\_VR\_Bsu\_TriplesILACrep1\_T1L1T2\_OG\_F12b  
 Scannumber: 21533  
 Protein: BSU16340; cheA; fliz  
 Peptide Score: 58.02  
 Method: ITMS; CID; 3

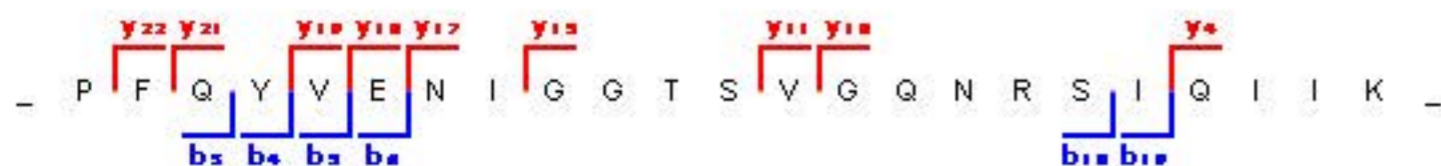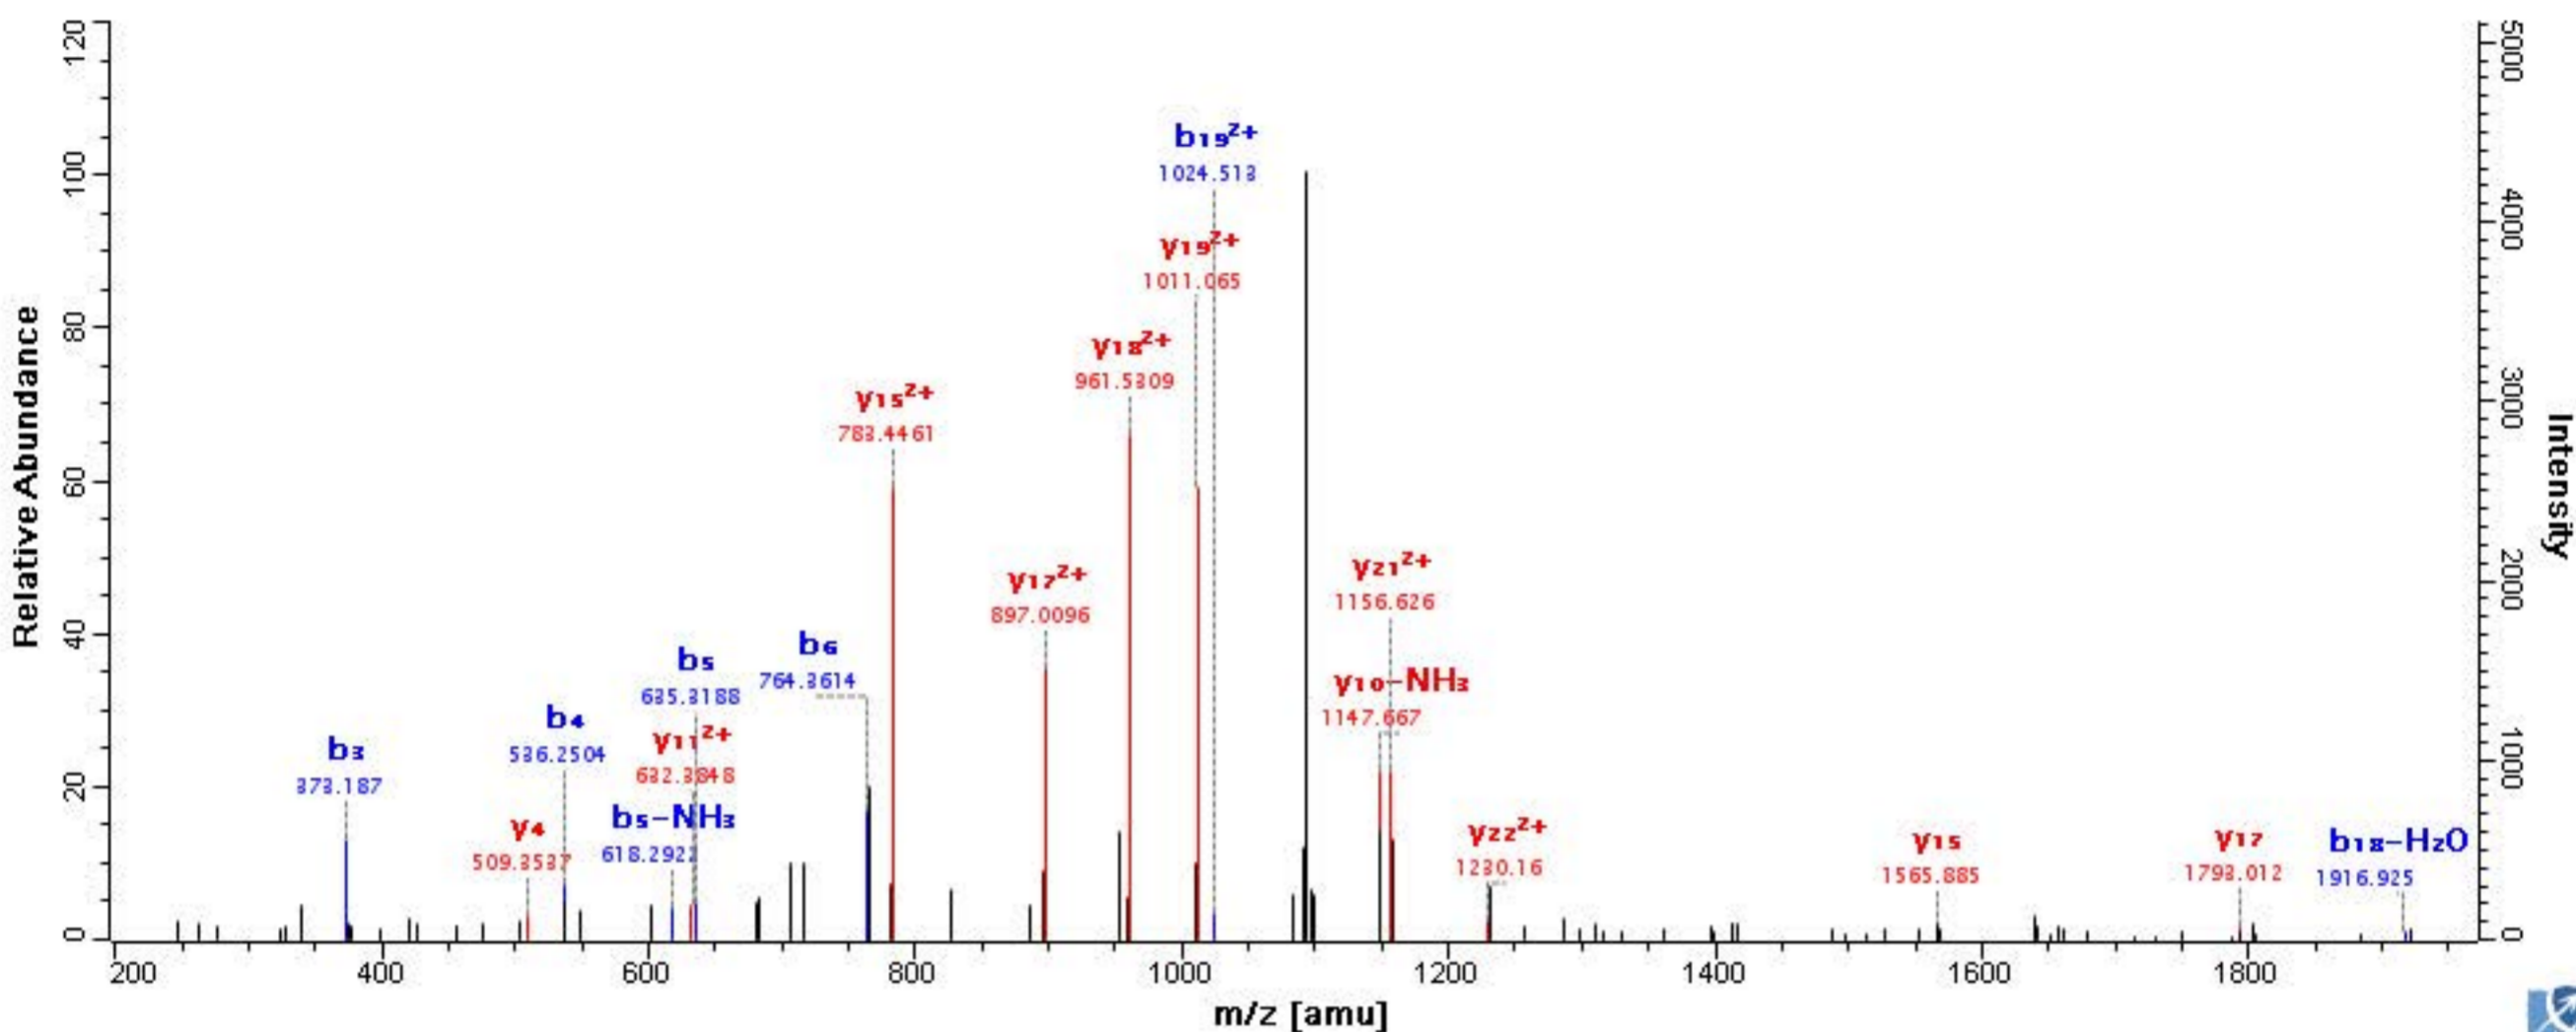

#### precursor information

|                   |                     |
|-------------------|---------------------|
| Mass:             | 2547.34102          |
| m/z:              | System.Collections. |
| Charge:           | System.Collections. |
| Retentiontime:    | System.Collections. |
| Score:            | 58.02433            |
| Mass Error [ppm]: | -1.3777             |
| PEP:              | 0.00019953          |
| Precursor Type:   | MULTI               |

| b <sup>2+</sup> ion |          | b ion     |          |    |     |    | y ion    |           | y <sup>2+</sup> ion |           |
|---------------------|----------|-----------|----------|----|-----|----|----------|-----------|---------------------|-----------|
| Δ dalton            | mass     | Δ dalton  | mass     |    | seq |    | Δ dalton | mass      | Δ dalton            | mass      |
|                     | 98.06004 |           | 98.06004 | 1  | P   | 22 |          |           |                     |           |
|                     | 245.1285 |           | 245.1285 | 2  | F   | 21 | 2459.313 |           | 1230.16             | -0.070784 |
|                     | 373.187  | -0.03365  | 373.187  | 3  | Q   | 20 | 2312.245 |           | 1156.626            | -0.224444 |
|                     | 536.2504 | -0.113458 | 536.2504 | 4  | Y   | 19 | 2184.186 |           | 2184.186            |           |
|                     | 635.3188 | +0.141248 | 635.3188 | 5  | V   | 18 | 2021.123 |           | 1011.065            | +0.375694 |
|                     | 764.3614 | -0.135415 | 764.3614 | 6  | E   | 17 | 1922.055 |           | 961.5309            | +0.2365   |
|                     | 878.4043 |           | 878.4043 | 7  | N   | 16 | 1793.012 | +0.318036 | 897.0096            | +0.315841 |
|                     | 991.4884 |           | 991.4884 | 8  | I   | 15 | 1678.969 |           | 1678.969            |           |
|                     | 1048.51  |           | 1048.51  | 9  | G   | 14 | 1565.885 | +0.189778 | 783.4461            | +0.326358 |
|                     | 1105.531 |           | 1105.531 | 10 | G   | 13 | 1508.863 |           | 1508.863            |           |
|                     | 1206.579 |           | 1206.579 | 11 | T   | 12 | 1451.842 |           | 1451.842            |           |
|                     | 1293.611 |           | 1293.611 | 12 | S   | 11 | 1350.794 |           | 1350.794            |           |
|                     | 1392.679 |           | 1392.679 | 13 | V   | 10 | 1263.762 |           | 632.3848            | -0.202718 |
|                     | 1449.701 |           | 1449.701 | 14 | G   | 9  | 1164.694 |           | 1164.694            |           |
|                     | 1577.759 |           | 1577.759 | 15 | Q   | 8  | 1107.672 |           | 1107.672            |           |
|                     | 1691.802 |           | 1691.802 | 16 | N   | 7  | 979.6138 |           | 979.6138            |           |
|                     | 1847.903 |           | 1847.903 | 17 | R   | 6  | 865.5709 |           | 865.5709            |           |
|                     | 1934.936 |           | 1934.936 | 18 | S   | 5  | 709.4698 |           | 709.4698            |           |
| -0.017212           | 1024.513 |           | 2048.02  | 19 | I   | 4  | 622.4378 |           | 622.4378            |           |
|                     | 2176.078 |           | 2176.078 | 20 | Q   | 3  | 509.3537 | +0.179495 | 509.3537            |           |
|                     | 2289.162 |           | 2289.162 | 21 | I   | 2  | 381.2951 |           | 381.2951            |           |
|                     | 2402.246 |           | 2402.246 | 22 | I   | 1  | 268.2111 |           | 268.2111            |           |
|                     |          |           |          | 23 | K   | 0  | 155.127  |           | 155.127             |           |

#### general information

|                       |             |
|-----------------------|-------------|
| Annotation:           | 12 of 23    |
| AminoAcids Coverage:  | 52 %        |
| Intensity Coverage:   | 44 %        |
| Protein Localisation: | 106 ... 128 |



Source: 20120510\_VR\_Bsu\_TripleSILACrep1\_T1L1T2\_OG\_F12b  
 Scannumber: 25202  
 Protein: BSU23050; ypaA  
 Peptide Score: 102.97  
 Method: ITMS; CID; 3

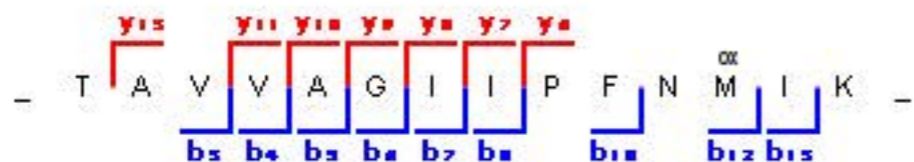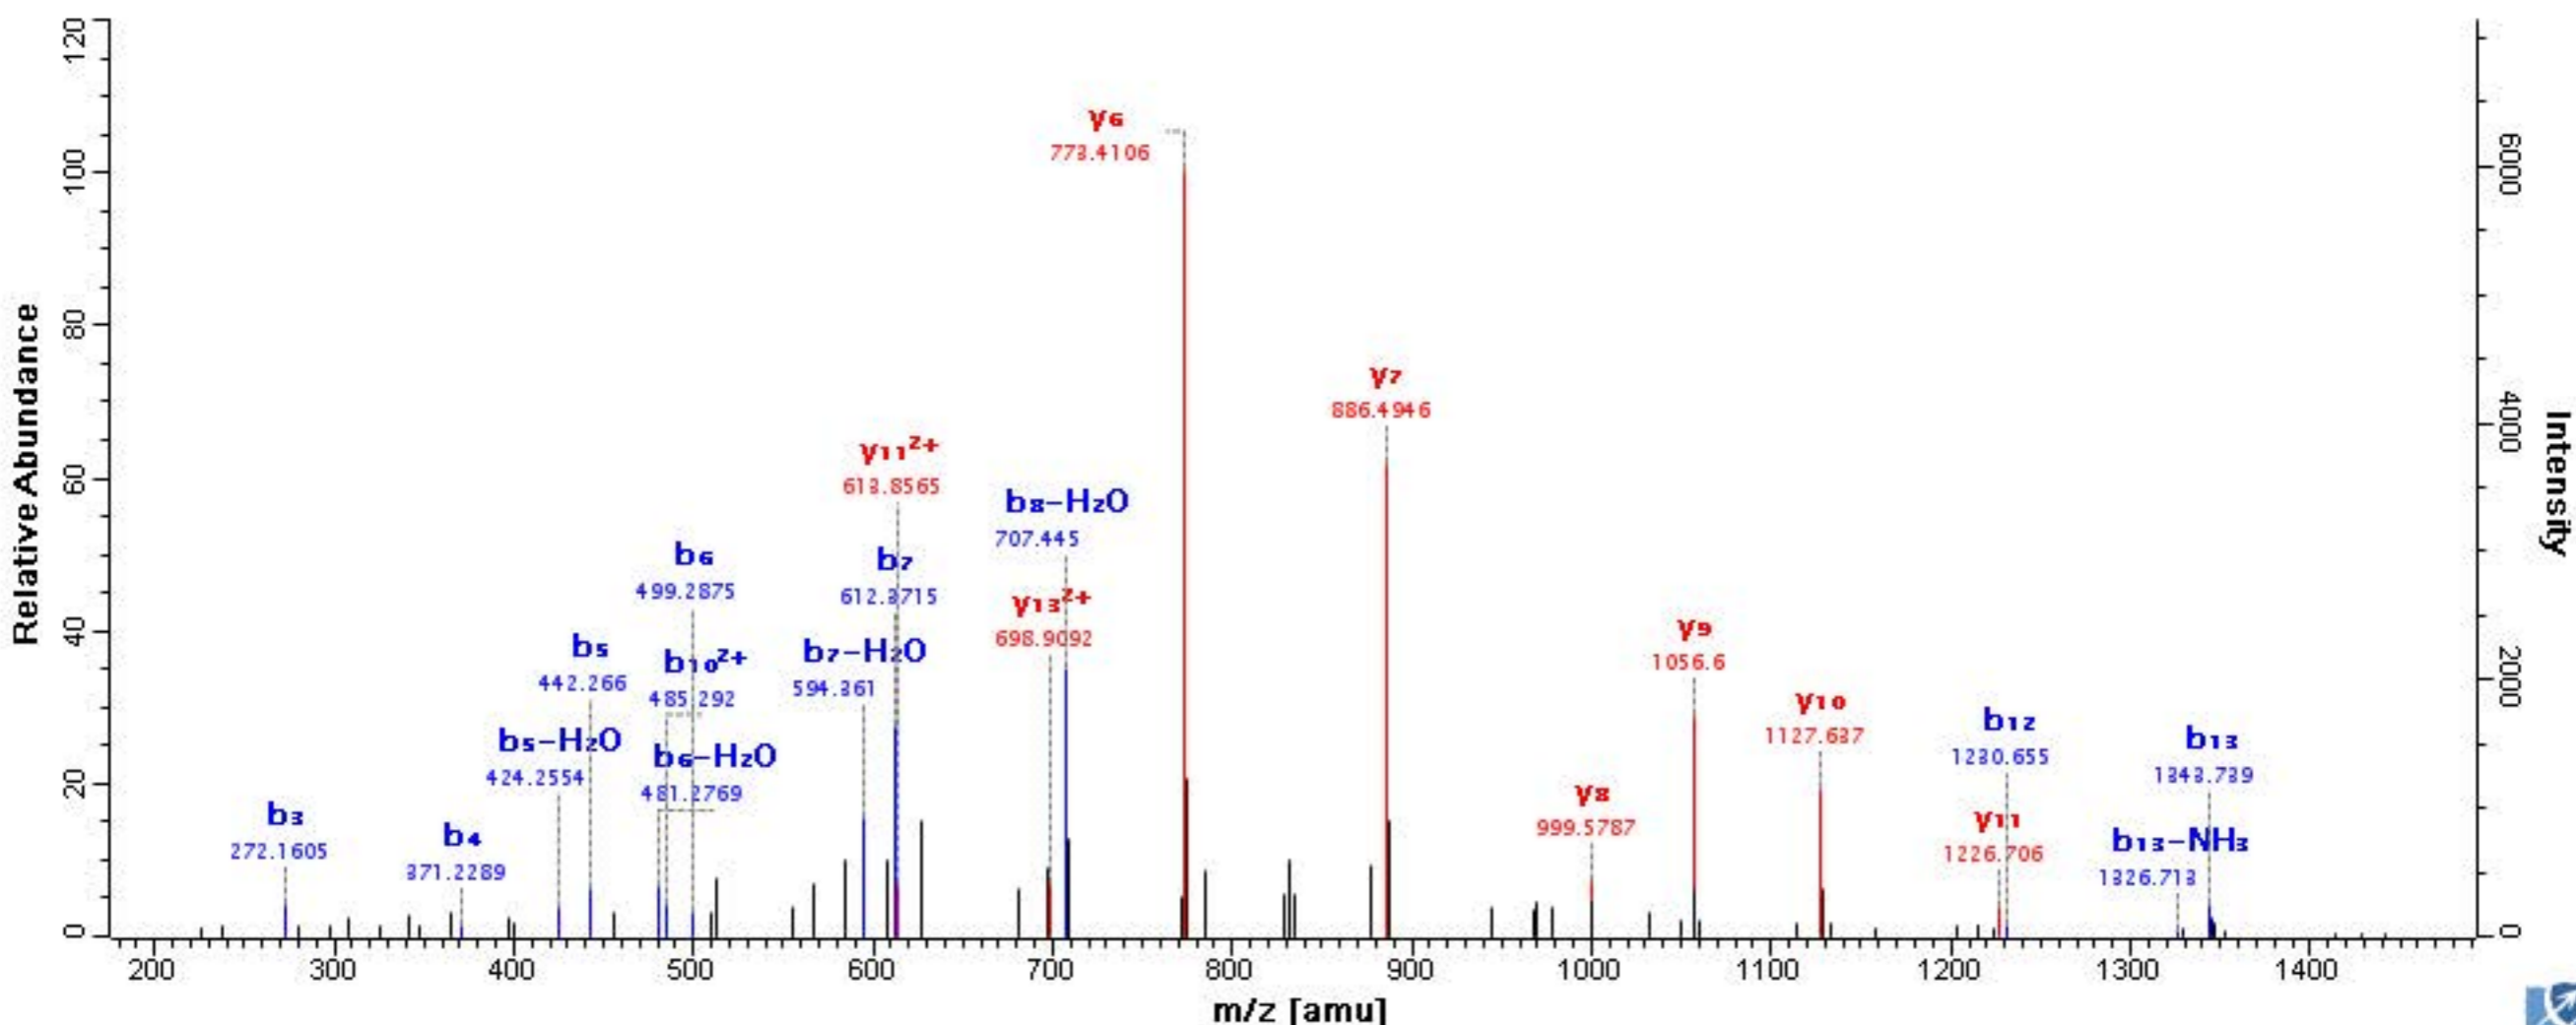

#### precursor information

|                   |                     |
|-------------------|---------------------|
| Mass:             | 1488.83912          |
| m/z:              | System.Collections. |
| Charge:           | System.Collections. |
| Retentiontime:    | System.Collections. |
| Score:            | 102.9703            |
| Mass Error [ppm]: | 1.1354              |
| PEP:              | 0.00020104          |
| Precursor Type:   | MULTI               |

#### general information

|                       |             |
|-----------------------|-------------|
| Annotation:           | 11 of 14    |
| AminoAcids Coverage:  | 79 %        |
| Intensity Coverage:   | 57 %        |
| Protein Localisation: | 149 ... 162 |

| b <sup>2+</sup> ion |          | b ion     |          | seq |   |    | y ion    |           | y <sup>2+</sup> ion |           |
|---------------------|----------|-----------|----------|-----|---|----|----------|-----------|---------------------|-----------|
| Δ dalton            | mass     | Δ dalton  | mass     |     |   |    | Δ dalton | mass      | Δ dalton            | mass      |
|                     | 102.055  |           | 102.055  | 1   | T | 13 |          |           |                     |           |
|                     | 173.0921 |           | 173.0921 | 2   | A | 12 | 1396.811 |           | 698.9092            | -0.453925 |
|                     | 272.1605 | +0.062692 | 272.1605 | 3   | V | 11 | 1325.774 |           | 1325.774            |           |
|                     | 371.2289 | -0.038955 | 371.2289 | 4   | V | 10 | 1226.706 | +0.211057 | 613.8565            | -0.056923 |
|                     | 442.266  | +0.020367 | 442.266  | 5   | A | 9  | 1127.637 | +0.008353 | 1127.637            |           |
|                     | 499.2875 | +0.073183 | 499.2875 | 6   | G | 8  | 1056.6   | -0.123723 | 1056.6              |           |
|                     | 612.3715 | -0.079363 | 612.3715 | 7   | I | 7  | 999.5787 | -0.007593 | 999.5787            |           |
|                     | 725.4556 |           | 725.4556 | 8   | I | 6  | 886.4946 | -0.07569  | 886.4946            |           |
|                     | 822.5084 |           | 822.5084 | 9   | P | 5  | 773.4106 | -0.045093 | 773.4106            |           |
| -0.242468           | 485.292  |           | 969.5768 | 10  | F | 4  | 676.3578 |           | 676.3578            |           |
|                     | 1083.62  |           | 1083.62  | 11  | N | 3  | 529.2894 |           | 529.2894            |           |
|                     | 1230.655 | +0.270553 | 1230.655 | 12  | M | 2  | 415.2465 |           | 415.2465            |           |
|                     | 1343.739 | -0.081578 | 1343.739 | 13  | I | 1  | 268.2111 |           | 268.2111            |           |
|                     |          |           |          | 14  | K | 0  | 155.127  |           | 155.127             |           |

Source: 20120514\_VR\_Bsu\_TripleSILACrep1\_pL2ESLS\_F08  
 Scannumber: 13641  
 Protein: BSU28650; ysgA  
 Peptide Score: 82.91  
 Method: ITMS; CID; 3

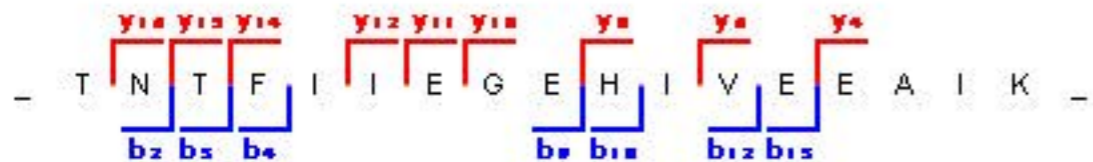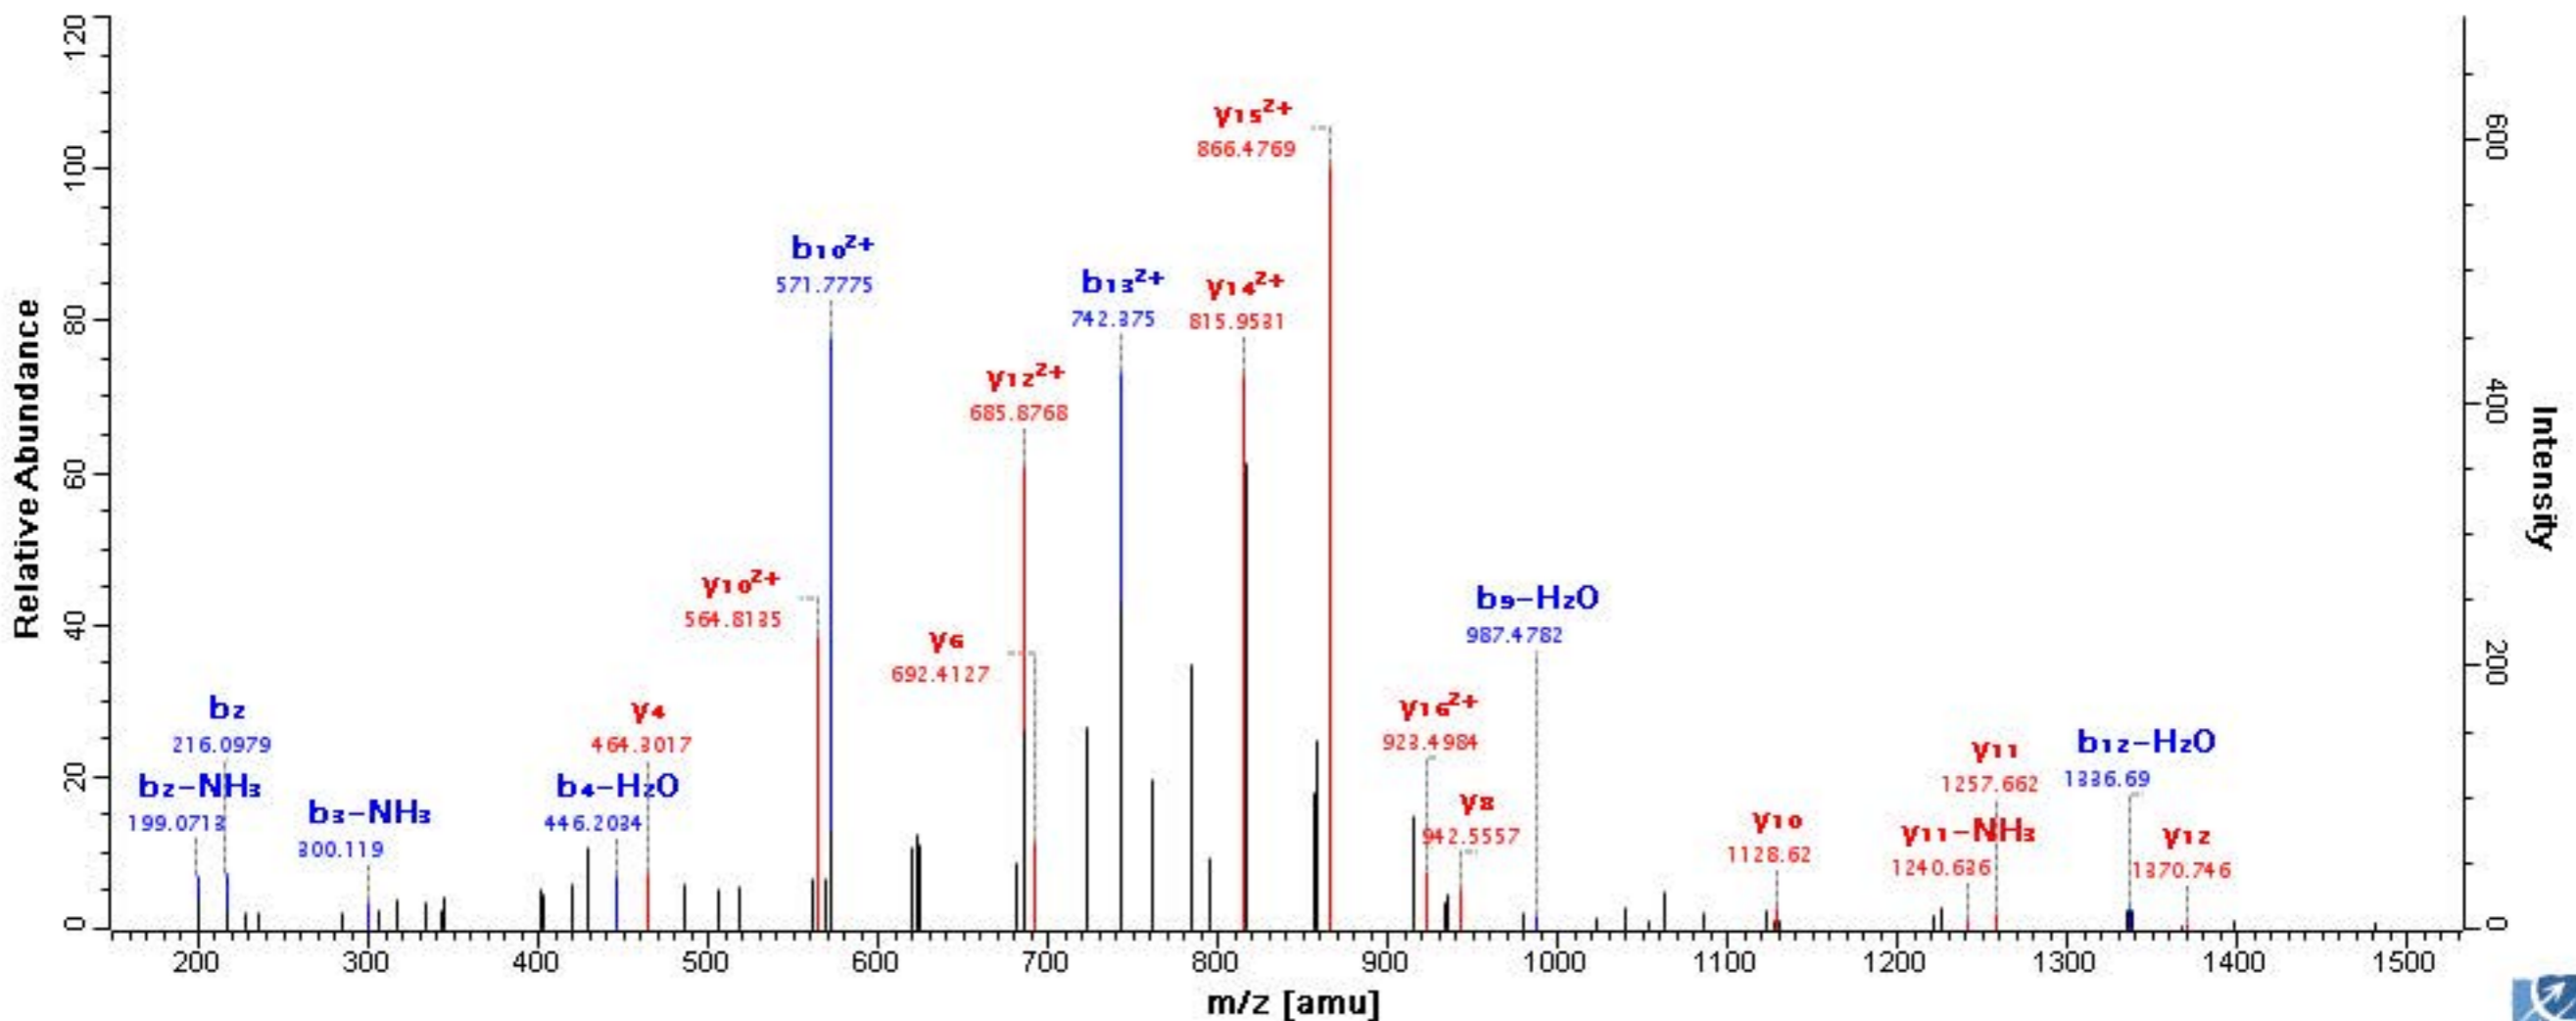

#### precursor information

|                   |                     |
|-------------------|---------------------|
| Mass:             | 1942.00476          |
| m/z:              | System.Collections. |
| Charge:           | System.Collections. |
| Retentiontime:    | System.Collections. |
| Score:            | 82.90767            |
| Mass Error [ppm]: | -0.0009983          |
| PEP:              | 0.0006632           |
| Precursor Type:   | MULTI               |

| b <sup>2+</sup> ion |          | b ion     |          | seq |   |    | y ion    |           | y <sup>2+</sup> ion |           |
|---------------------|----------|-----------|----------|-----|---|----|----------|-----------|---------------------|-----------|
| Δ dalton            | mass     | Δ dalton  | mass     |     |   |    | Δ dalton | mass      | Δ dalton            | mass      |
|                     | 102.055  |           | 102.055  | 1   | T | 16 |          |           |                     |           |
|                     | 216.0979 | +0.132586 | 216.0979 | 2   | N | 15 | 1845.989 |           | 923.4984            | +0.157392 |
|                     | 317.1456 |           | 317.1456 | 3   | T | 14 | 1731.947 |           | 866.4769            | +0.254051 |
|                     | 464.214  |           | 464.214  | 4   | F | 13 | 1630.899 |           | 815.9531            | -0.037356 |
|                     | 577.298  |           | 577.298  | 5   | I | 12 | 1483.83  |           | 1483.83             |           |
|                     | 690.3821 |           | 690.3821 | 6   | I | 11 | 1370.746 | -0.033854 | 685.8768            | +0.039127 |
|                     | 819.4247 |           | 819.4247 | 7   | E | 10 | 1257.662 | +0.18937  | 1257.662            |           |
|                     | 876.4462 |           | 876.4462 | 8   | G | 9  | 1128.62  | -0.25522  | 564.8135            | +0.23954  |
|                     | 1005.489 |           | 1005.489 | 9   | E | 8  | 1071.598 |           | 1071.598            |           |
| +0.347591           | 571.7775 |           | 1142.548 | 10  | H | 7  | 942.5557 | +0.091735 | 942.5557            |           |
|                     | 1255.632 |           | 1255.632 | 11  | I | 6  | 805.4968 |           | 805.4968            |           |
|                     | 1354.7   |           | 1354.7   | 12  | V | 5  | 692.4127 | +0.186188 | 692.4127            |           |
| -0.088934           | 742.375  |           | 1483.743 | 13  | E | 4  | 593.3443 |           | 593.3443            |           |
|                     | 1612.785 |           | 1612.785 | 14  | E | 3  | 464.3017 | +0.037857 | 464.3017            |           |
|                     | 1683.822 |           | 1683.822 | 15  | A | 2  | 335.2591 |           | 335.2591            |           |
|                     | 1796.907 |           | 1796.907 | 16  | I | 1  | 264.222  |           | 264.222             |           |
|                     |          |           |          | 17  | K | 0  | 151.1379 |           | 151.1379            |           |

#### general information

|                       |           |
|-----------------------|-----------|
| Annotation:           | 12 of 17  |
| AminoAcids Coverag    | 71 %      |
| Intensity Coverage:   | 49 %      |
| Protein Localisation: | 27 ... 43 |

Source: 20120514\_VR\_Bsu\_TripleSILACrep1\_pL2ESLS\_FD8  
 Scannumber: 3675  
 Protein: BSU28910; IrgA; ysbA  
 Peptide Score: 109.24  
 Method: ITMS; CID; 3

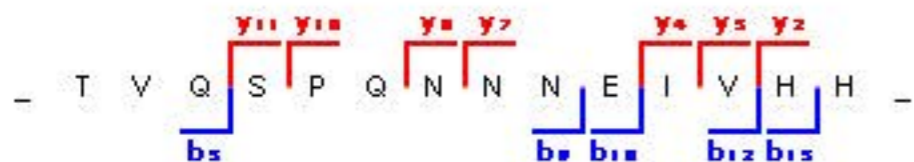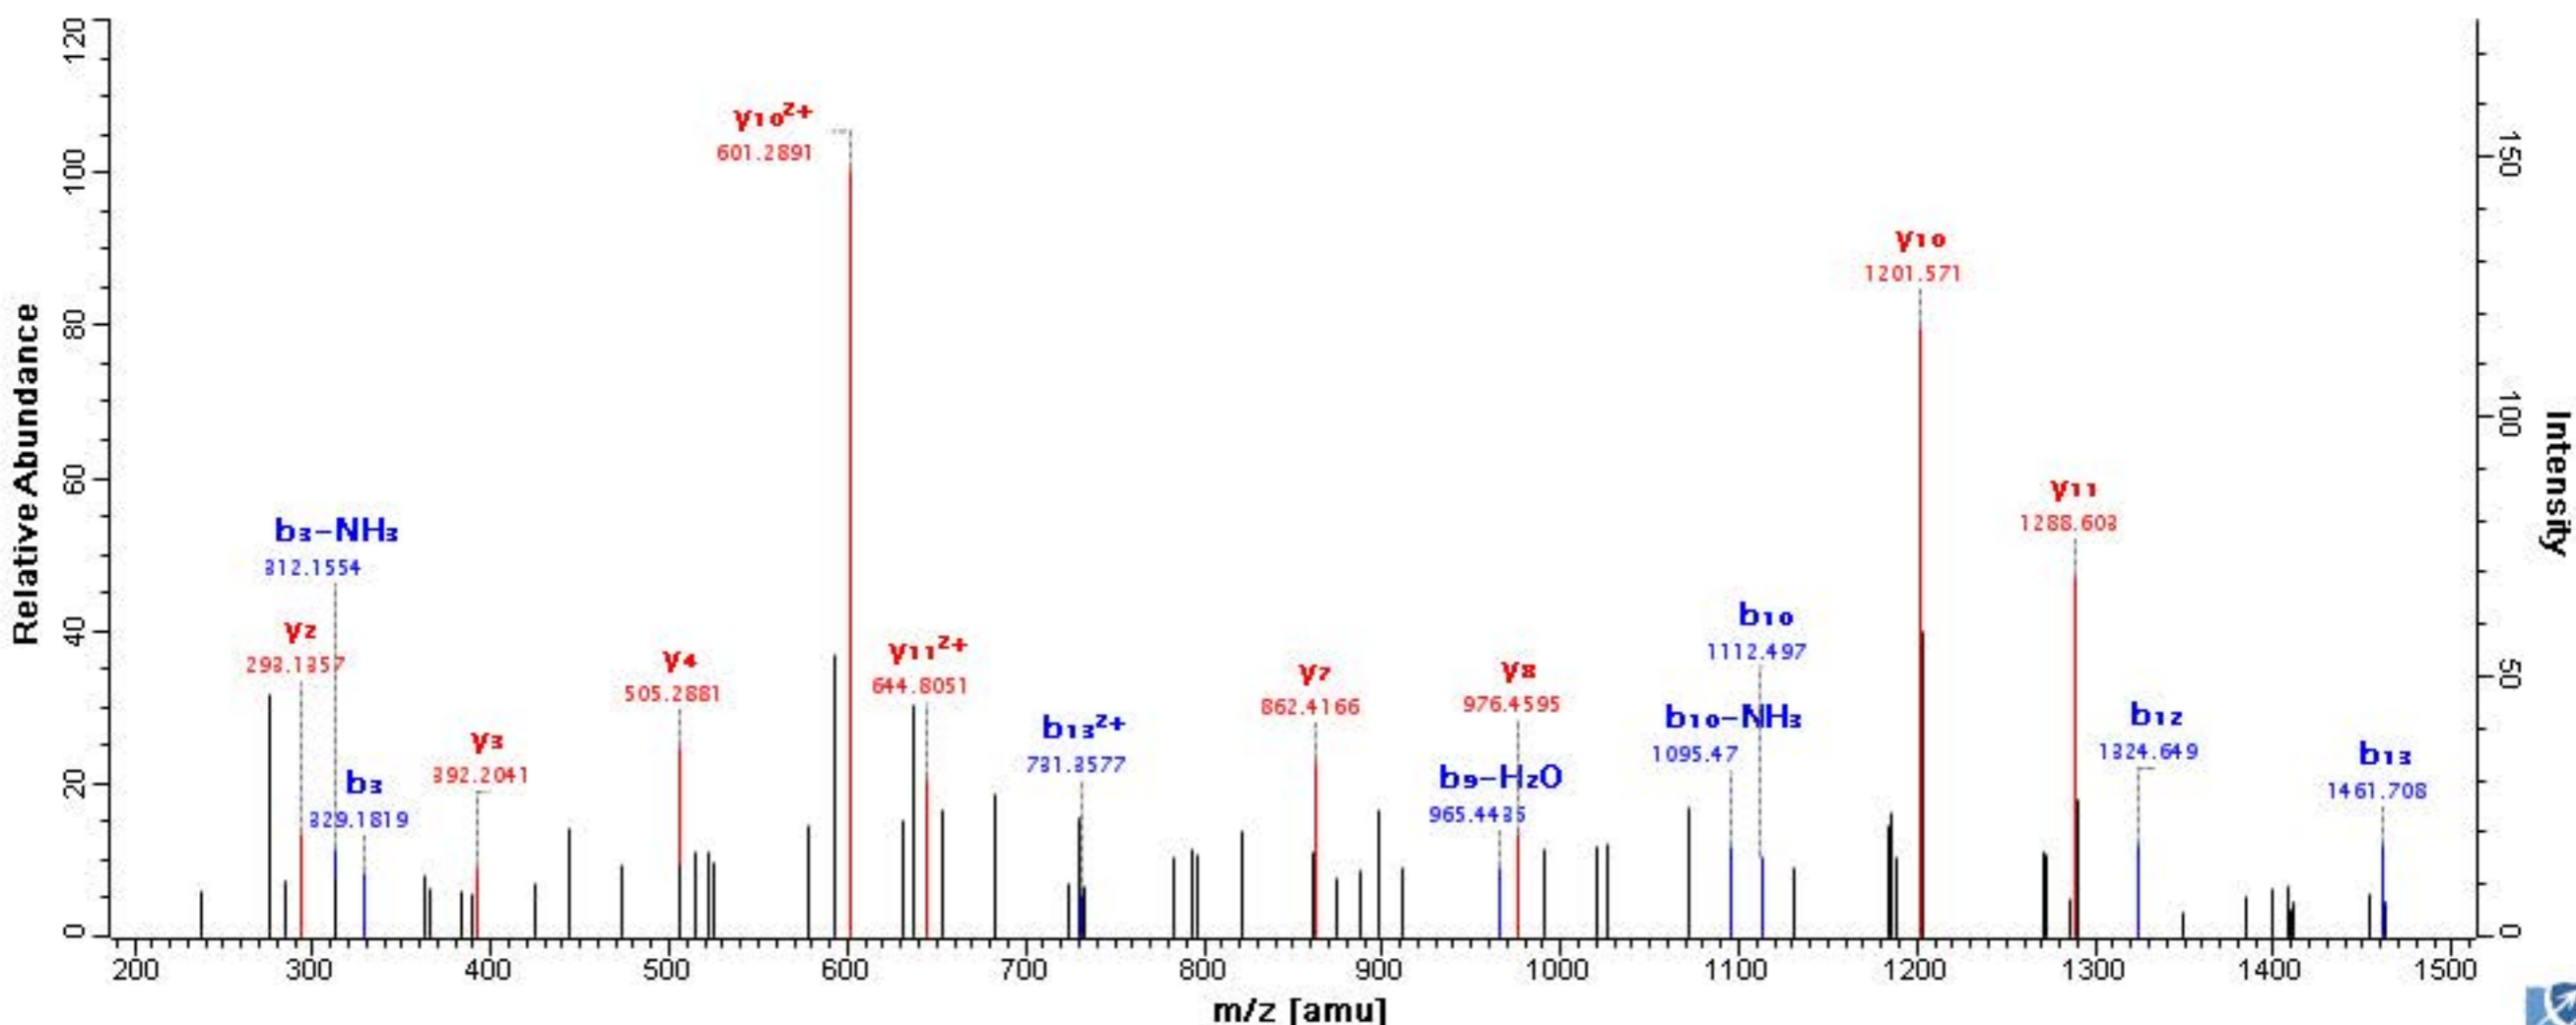

#### precursor information

|                   |                     |
|-------------------|---------------------|
| Mass:             | 1615.77012          |
| m/z:              | System.Collections. |
| Charge:           | System.Collections. |
| Retentiontime:    | System.Collections. |
| Score:            | 109.236             |
| Mass Error [ppm]: | -0.098832           |
| PEP:              | 0.0021293           |
| Precursor Type:   | ISO                 |

#### general information

|                       |             |
|-----------------------|-------------|
| Annotation:           | 10 of 14    |
| AminoAcids Coverage:  | 71 %        |
| Intensity Coverage:   | 38 %        |
| Protein Localisation: | 133 ... 146 |

| b <sup>2+</sup> ion |          | b ion     |          | seq |   |    | y ion    |           | y <sup>2+</sup> ion |           |
|---------------------|----------|-----------|----------|-----|---|----|----------|-----------|---------------------|-----------|
| Δ dalton            | mass     | Δ dalton  | mass     |     |   |    | Δ dalton | mass      | Δ dalton            | mass      |
|                     | 102.055  |           | 102.055  | 1   | T | 13 |          |           |                     |           |
|                     | 201.1234 |           | 201.1234 | 2   | V | 12 | 1515.73  |           | 1515.73             |           |
|                     | 329.1819 | -0.063965 | 329.1819 | 3   | Q | 11 | 1416.661 |           | 1416.661            |           |
|                     | 416.214  |           | 416.214  | 4   | S | 10 | 1288.603 | +0.00905  | 644.8051            | +0.086092 |
|                     | 513.2667 |           | 513.2667 | 5   | P | 9  | 1201.571 | -0.061582 | 601.2891            | +0.253535 |
|                     | 641.3253 |           | 641.3253 | 6   | Q | 8  | 1104.518 |           | 1104.518            |           |
|                     | 755.3682 |           | 755.3682 | 7   | N | 7  | 976.4595 | +0.114029 | 976.4595            |           |
|                     | 869.4112 |           | 869.4112 | 8   | N | 6  | 862.4166 | +0.114171 | 862.4166            |           |
|                     | 983.4541 |           | 983.4541 | 9   | N | 5  | 748.3737 |           | 748.3737            |           |
|                     | 1112.497 | +0.14198  | 1112.497 | 10  | E | 4  | 634.3307 |           | 634.3307            |           |
|                     | 1225.581 |           | 1225.581 | 11  | I | 3  | 505.2881 | -0.122127 | 505.2881            |           |
|                     | 1324.649 | +0.005494 | 1324.649 | 12  | V | 2  | 392.2041 | +0.102989 | 392.2041            |           |
| -0.117628           | 731.3577 | -0.096753 | 1461.708 | 13  | H | 1  | 293.1357 | -0.057967 | 293.1357            |           |
|                     |          |           |          | 14  | H | 0  | 156.0768 |           | 156.0768            |           |

Source: 20120514\_VR\_Bsu\_TripleSILACrep1\_pL2ESLS\_FD9  
 Scannumber: 5077  
 Protein: BSU31620; mrpC; yufV  
 Peptide Score: 136.93  
 Method: ITMS; CID; 3

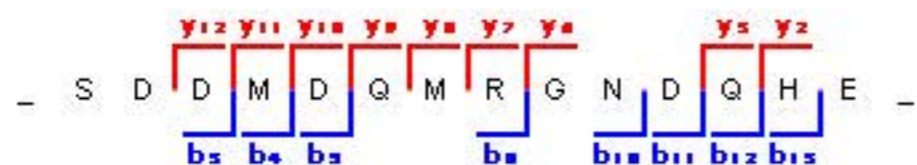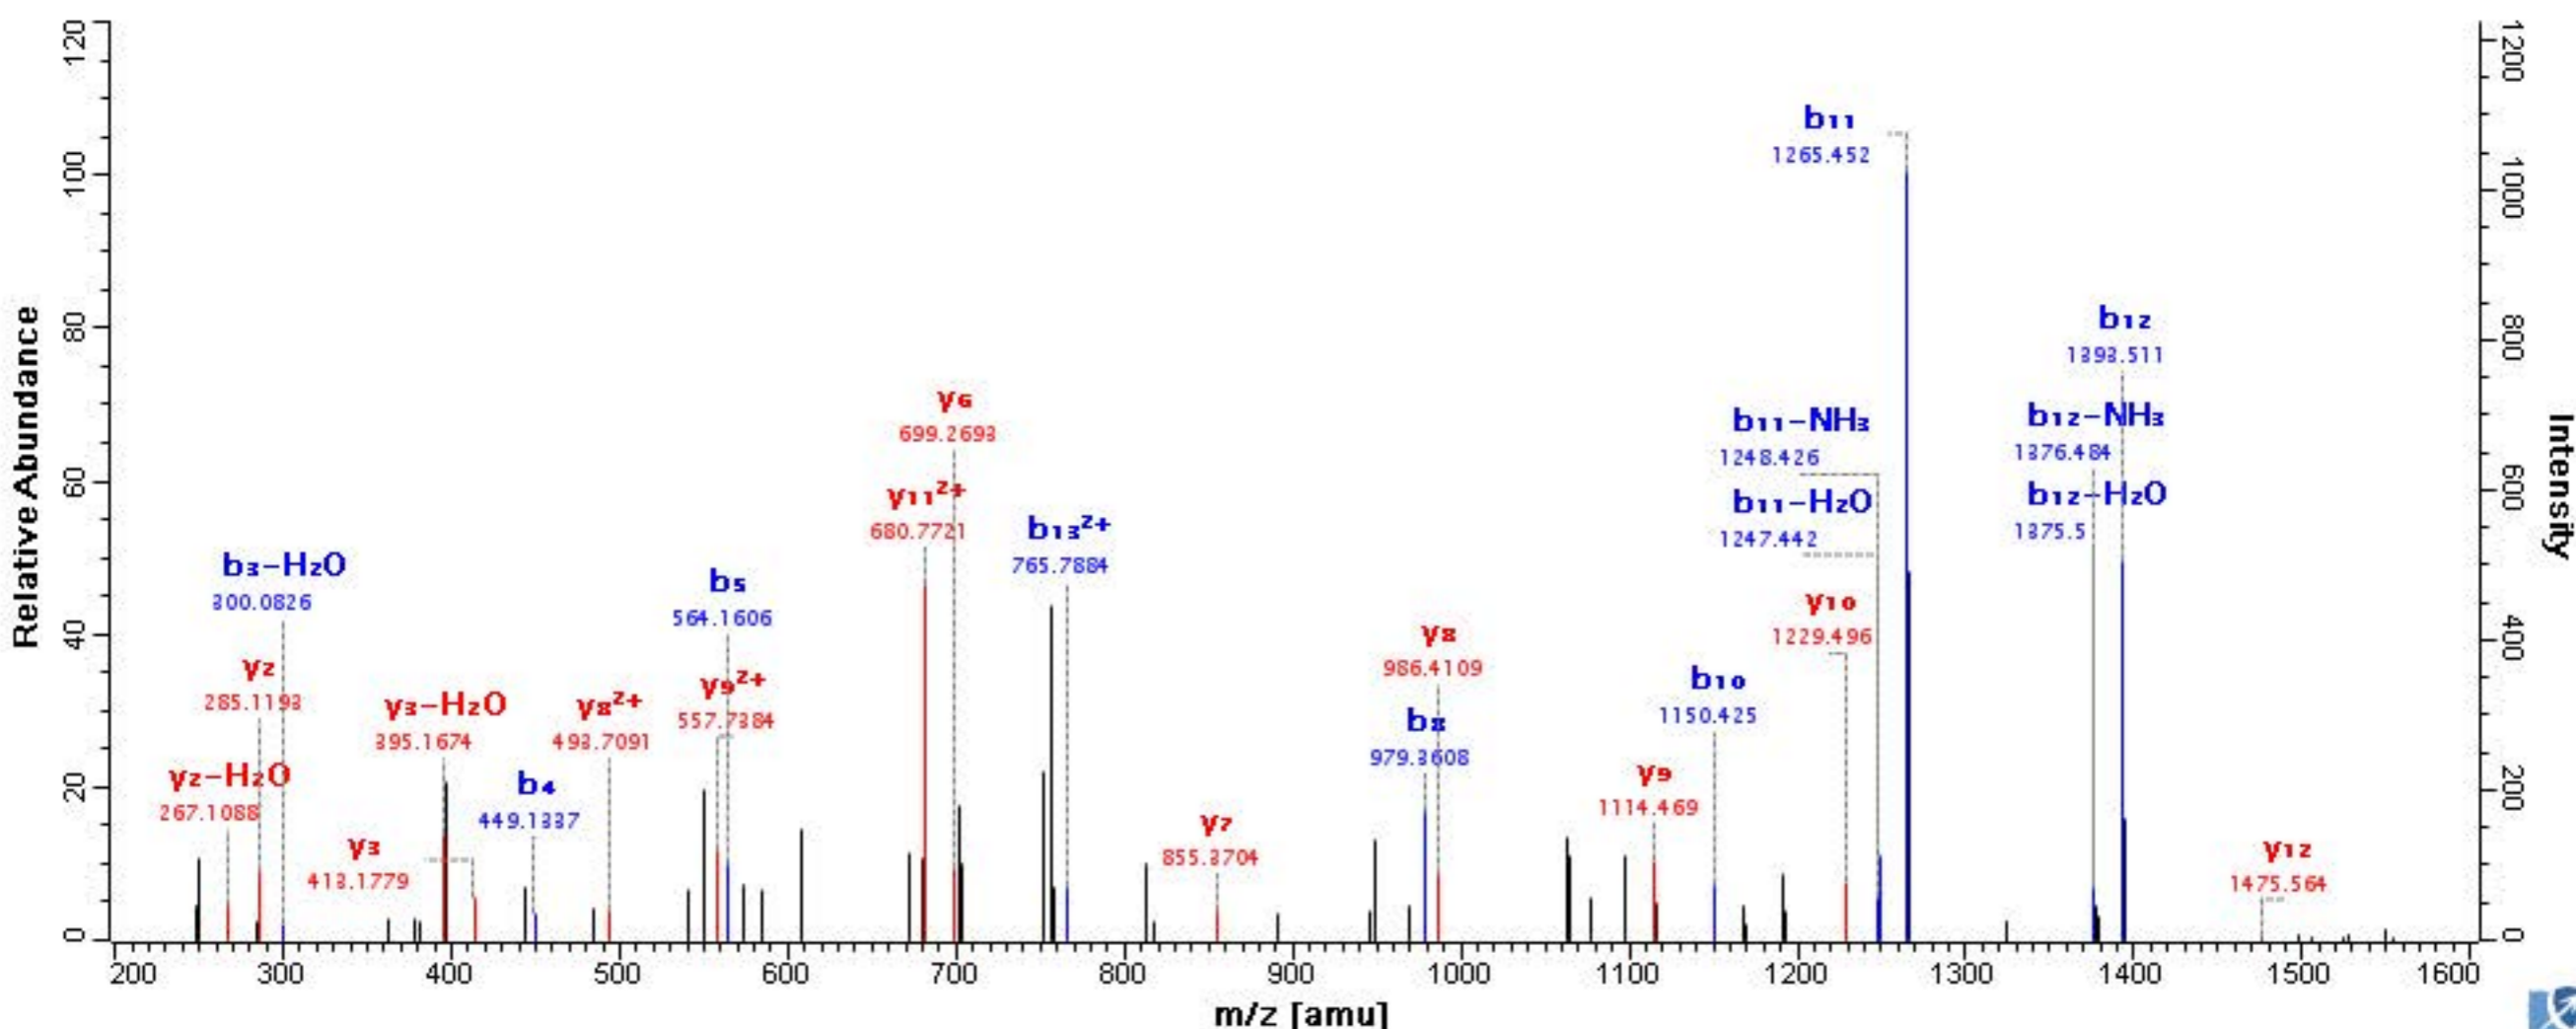

#### precursor information

|                   |                     |
|-------------------|---------------------|
| Mass:             | 1676.61583          |
| m/z:              | System.Collections. |
| Charge:           | System.Collections. |
| Retentiontime:    | System.Collections. |
| Score:            | 136.9324            |
| Mass Error [ppm]: | 0.19706             |
| PEP:              | 2.0946E-06          |
| Precursor Type:   | ISO                 |

#### general information

|                       |             |
|-----------------------|-------------|
| Annotation:           | 11 of 14    |
| AminoAcids Coverag    | 79 %        |
| Intensity Coverage:   | 46 %        |
| Protein Localisation: | 100 ... 113 |

| b <sup>2+</sup> ion |          | b ion     |          | seq |   |    | y ion    |           | y <sup>2+</sup> ion |           |
|---------------------|----------|-----------|----------|-----|---|----|----------|-----------|---------------------|-----------|
| Δ dalton            | mass     | Δ dalton  | mass     |     |   |    | Δ dalton | mass      | Δ dalton            | mass      |
|                     | 88.0393  |           | 88.0393  | 1   | S | 13 |          |           |                     |           |
|                     | 203.0662 |           | 203.0662 | 2   | D | 12 | 1590.591 |           | 1590.591            |           |
|                     | 318.0932 |           | 318.0932 | 3   | D | 11 | 1475.564 | +0.37028  | 1475.564            |           |
|                     | 449.1337 | +0.177787 | 449.1337 | 4   | M | 10 | 1360.537 |           | 680.7721            | +0.163357 |
|                     | 564.1606 | +0.035854 | 564.1606 | 5   | D | 9  | 1229.496 | +0.043665 | 1229.496            |           |
|                     | 692.2192 |           | 692.2192 | 6   | Q | 8  | 1114.469 | +0.131765 | 557.7384            | +0.04546  |
|                     | 823.2597 |           | 823.2597 | 7   | M | 7  | 986.4109 | +0.067235 | 493.7091            | -0.249409 |
|                     | 979.3608 | -0.041944 | 979.3608 | 8   | R | 6  | 855.3704 | +0.105522 | 855.3704            |           |
|                     | 1036.382 |           | 1036.382 | 9   | G | 5  | 699.2693 | +0.128874 | 699.2693            |           |
|                     | 1150.425 | +0.066028 | 1150.425 | 10  | N | 4  | 642.2478 |           | 642.2478            |           |
|                     | 1265.452 | +0.014549 | 1265.452 | 11  | D | 3  | 528.2049 |           | 528.2049            |           |
|                     | 1393.511 | -0.086875 | 1393.511 | 12  | Q | 2  | 413.1779 | +0.170831 | 413.1779            |           |
| -0.041437           | 765.7884 |           | 1530.57  | 13  | H | 1  | 285.1193 | +0.184456 | 285.1193            |           |
|                     |          |           |          | 14  | F | 0  | 148.0604 |           | 148.0604            |           |

Source: 20120514\_VR\_Bsu\_TripleSILACrep1\_pL2ESLS\_F10  
 Scannumber: 12505  
 Protein: BSU22500; jojD; ypjD  
 Peptide Score: 135.81  
 Method: ITMS; CID; 3

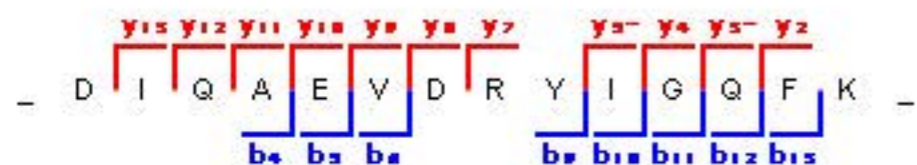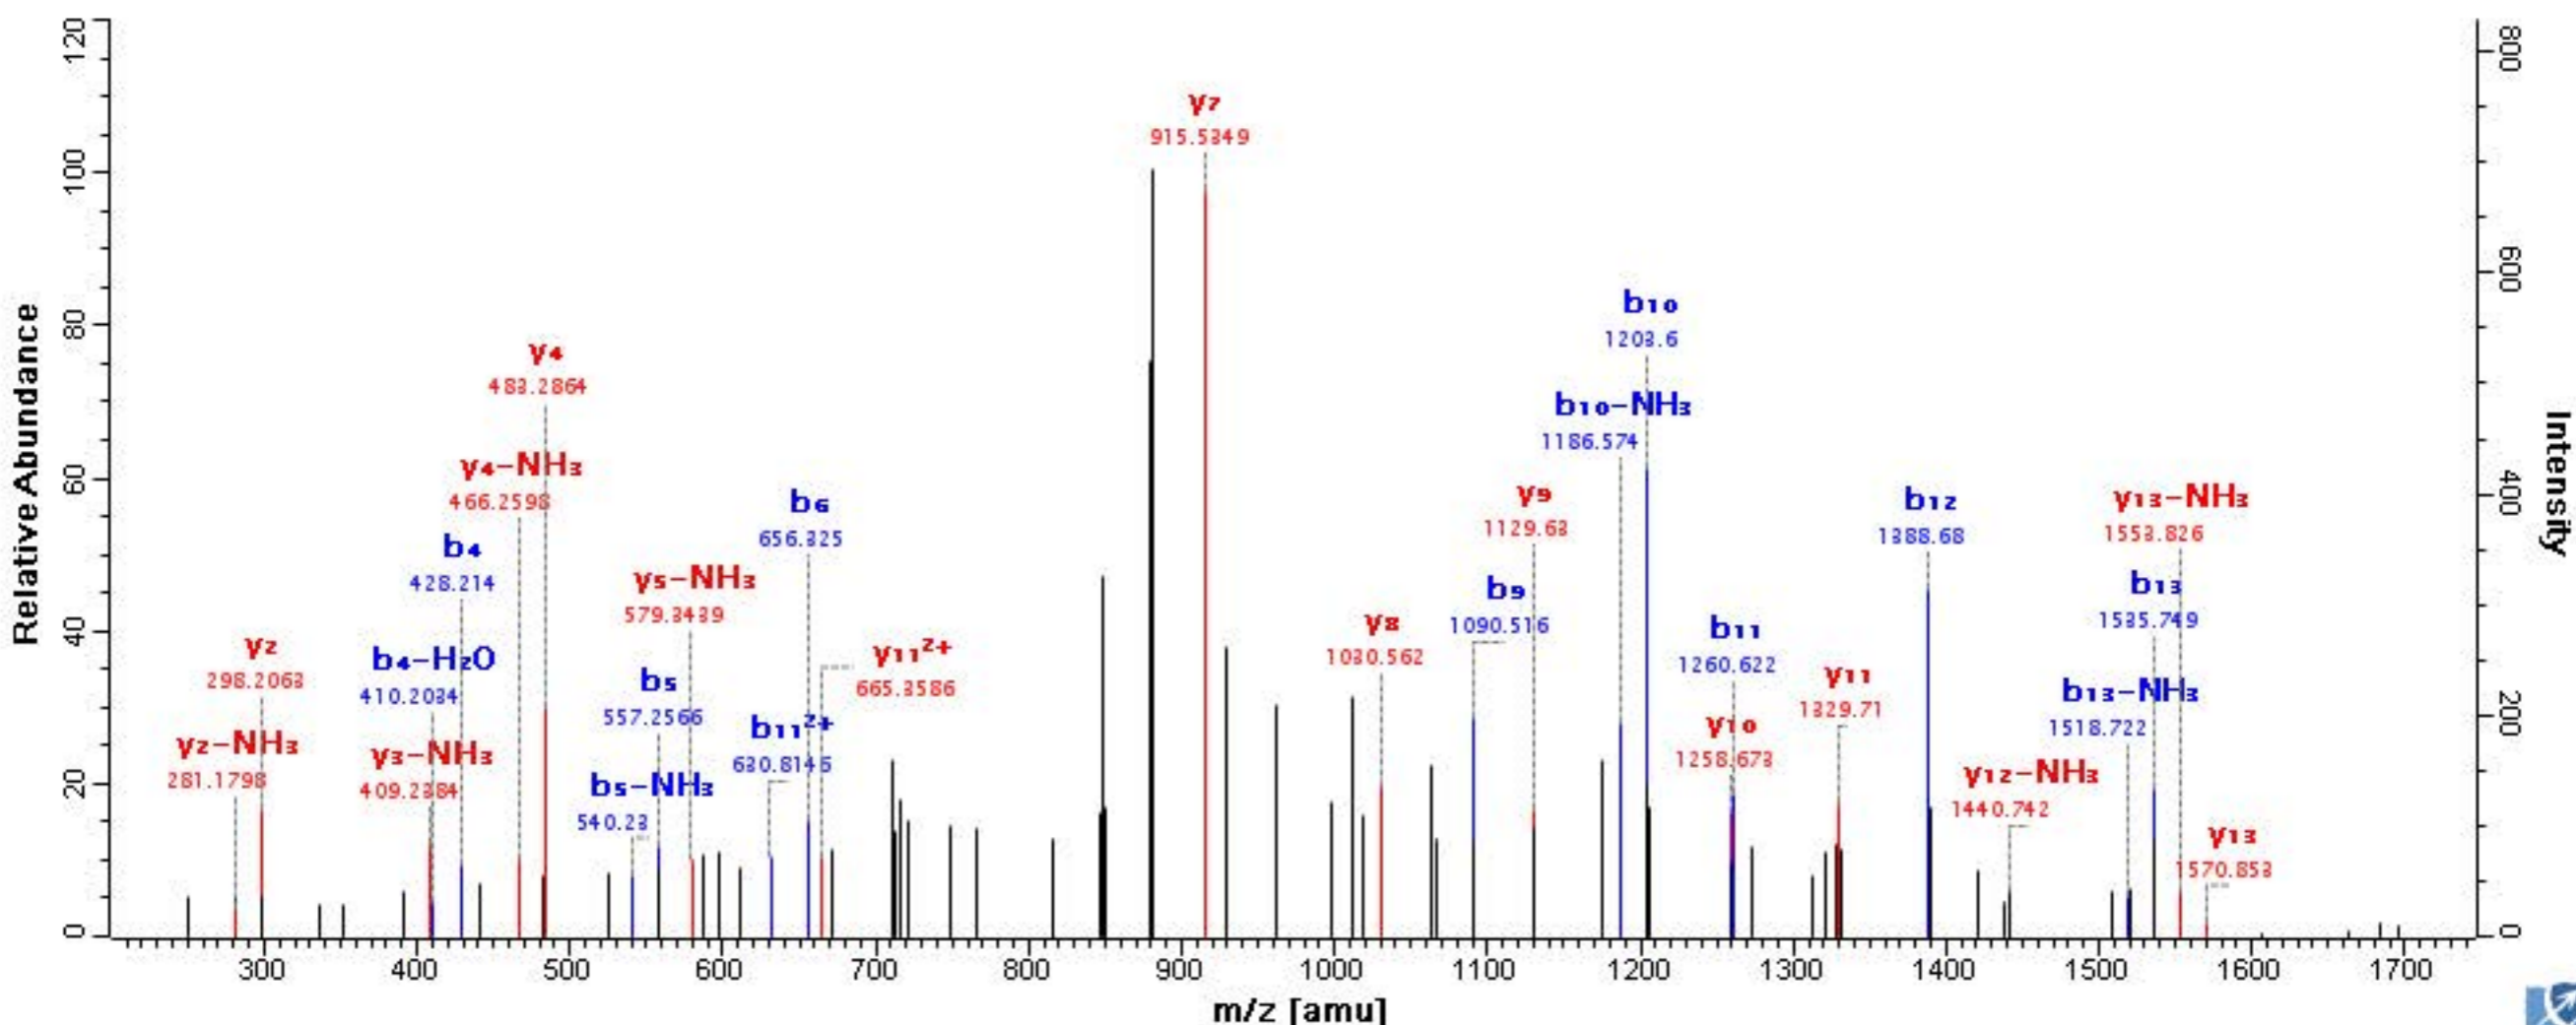

**precursor information**

|                   |                     |
|-------------------|---------------------|
| Mass:             | 1680.84569          |
| m/z:              | System.Collections. |
| Charge:           | System.Collections. |
| Retentiontime:    | System.Collections. |
| Score:            | 135.8143            |
| Mass Error [ppm]: | -0.85799            |
| PEP:              | 3.7566E-08          |
| Precursor Type:   | MULTI               |

**general information**

|                       |          |
|-----------------------|----------|
| Annotation:           | 12 of 14 |
| AminoAcids Coverage:  | 86 %     |
| Intensity Coverage:   | 37 %     |
| Protein Localisation: | 8 ... 21 |

| b <sup>2+</sup> ion |          | b ion     |          | seq |   |    | y ion    |           | y <sup>2+</sup> ion |           |
|---------------------|----------|-----------|----------|-----|---|----|----------|-----------|---------------------|-----------|
| Δ dalton            | mass     | Δ dalton  | mass     |     |   |    | Δ dalton | mass      | Δ dalton            | mass      |
|                     | 116.0342 |           | 116.0342 | 1   | D | 13 |          |           |                     |           |
|                     | 229.1183 |           | 229.1183 | 2   | I | 12 | 1570.853 | -0.01444  | 1570.853            |           |
|                     | 357.1769 |           | 357.1769 | 3   | Q | 11 | 1457.769 |           | 1457.769            |           |
|                     | 428.214  | -0.03978  | 428.214  | 4   | A | 10 | 1329.71  | +0.070706 | 665.3586            | -0.177514 |
|                     | 557.2566 | +0.102014 | 557.2566 | 5   | E | 9  | 1258.673 | +0.105622 | 1258.673            |           |
|                     | 656.325  | +0.073028 | 656.325  | 6   | V | 8  | 1129.63  | +0.066306 | 1129.63             |           |
|                     | 771.3519 |           | 771.3519 | 7   | D | 7  | 1030.562 | +0.061356 | 1030.562            |           |
|                     | 927.453  |           | 927.453  | 8   | R | 6  | 915.5349 | +0.225872 | 915.5349            |           |
|                     | 1090.516 | +0.21679  | 1090.516 | 9   | Y | 5  | 759.4338 |           | 759.4338            |           |
|                     | 1203.6   | +0.061071 | 1203.6   | 10  | I | 4  | 596.3704 |           | 596.3704            |           |
| +0.403555           | 630.8146 | +0.200862 | 1260.622 | 11  | G | 3  | 483.2864 | +0.079967 | 483.2864            |           |
|                     | 1388.68  | +0.076488 | 1388.68  | 12  | Q | 2  | 426.2649 |           | 426.2649            |           |
|                     | 1535.749 | -0.007551 | 1535.749 | 13  | F | 1  | 298.2063 | +0.19077  | 298.2063            |           |
|                     |          |           |          | 14  | K | 0  | 151.1379 |           | 151.1379            |           |

Source: 20120514\_VR\_Bsu\_TripleSILACrep1\_pL2ESLS\_F10  
 Scannumber: 4317  
 Protein: BSU00330; yabA  
 Peptide Score: 145.28  
 Method: ITMS; CID; 3

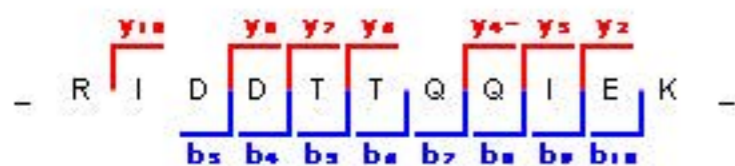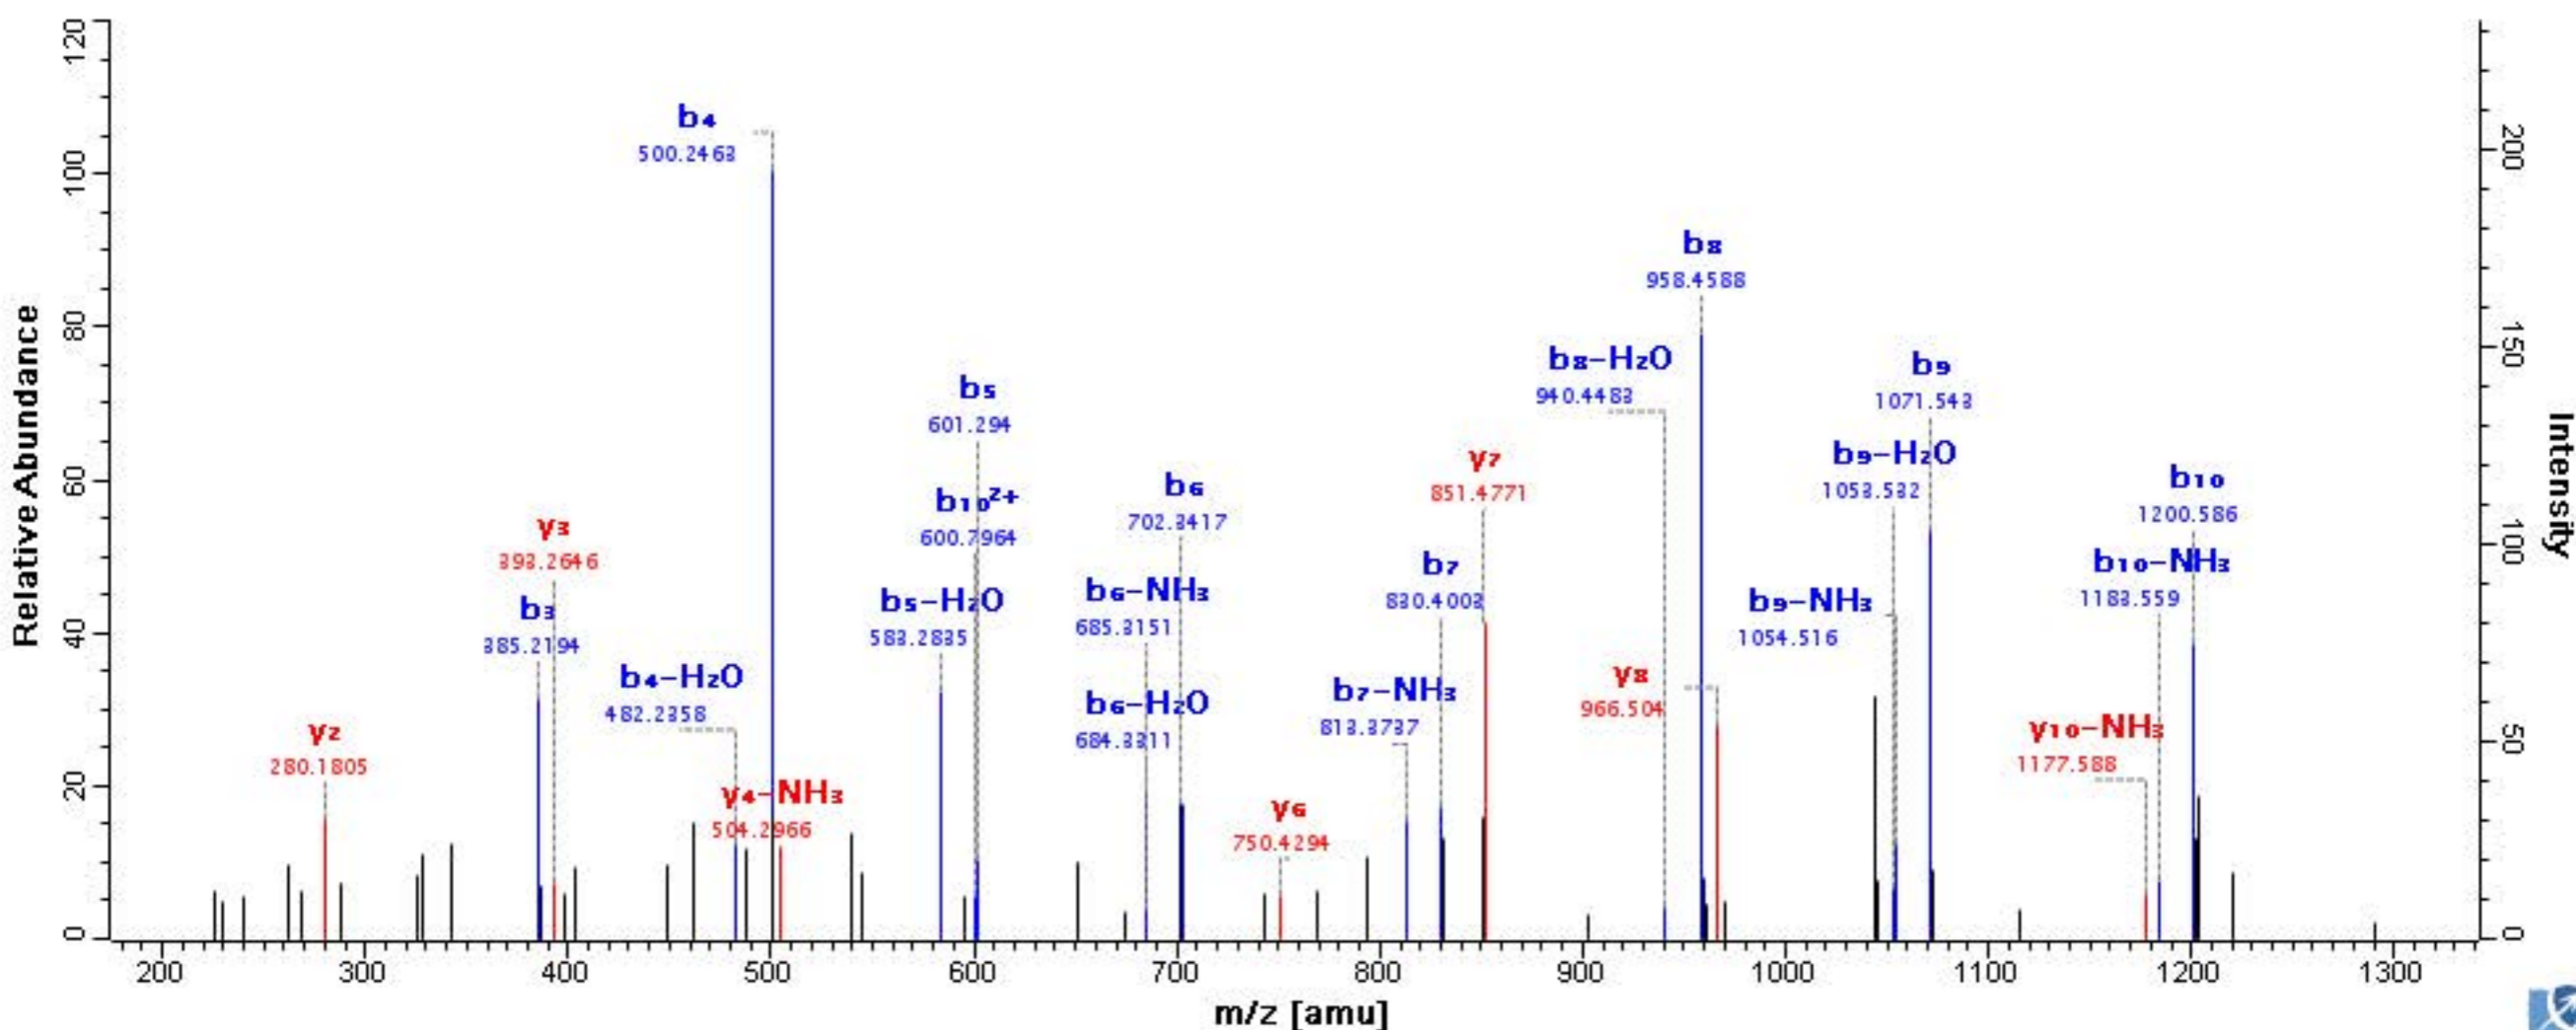

#### precursor information

|                   |                     |
|-------------------|---------------------|
| Mass:             | 1349.70851          |
| m/z:              | System.Collections. |
| Charge:           | System.Collections. |
| Retentiontime:    | System.Collections. |
| Score:            | 145.2753            |
| Mass Error [ppm]: | -0.26568            |
| PEP:              | 3.0193E-10          |
| Precursor Type:   | ISO                 |

#### general information

|                       |           |
|-----------------------|-----------|
| Annotation:           | 9 of 11   |
| AminoAcids Coverage:  | 82 %      |
| Intensity Coverage:   | 61 %      |
| Protein Localisation: | 51 ... 61 |

| b <sup>2+</sup> ion |              | b ion      |              |     | y ion    |      |
|---------------------|--------------|------------|--------------|-----|----------|------|
| Δ dalton            | mass         | Δ dalton   | mass         | seq | Δ dalton | mass |
|                     | 157.10838749 |            | 157.10838749 | 1   | R        | 10   |
|                     | 270.19245148 |            | 270.19245148 | 2   | I        | 9    |
|                     | 385.21939451 | +0.1535913 | 385.21939451 | 3   | D        | 8    |
|                     | 500.24633754 | -0.0176388 | 500.24633754 | 4   | D        | 7    |
|                     | 601.29401601 | +0.1581324 | 601.29401601 | 5   | T        | 6    |
|                     | 702.34169449 | +0.0976976 | 702.34169449 | 6   | T        | 5    |
|                     | 830.400272   | +0.1753506 | 830.400272   | 7   | Q        | 4    |
|                     | 958.45884951 | +0.0830816 | 958.45884951 | 8   | Q        | 3    |
|                     | 1071.5429135 | +0.0852603 | 1071.5429135 | 9   | I        | 2    |
| -0.4936572          | 600.79639153 | +0.0675696 | 1200.5855066 | 10  | E        | 1    |
|                     |              |            |              | 11  | K        | 0    |

Source: 20120514\_VR\_Bsu\_TripleSILACrep1\_pL2ESLS\_F12  
 Scannumber: 2745  
 Protein: BSU38150; ipa-39d; qoxC  
 Peptide Score: 97.57  
 Method: ITMS; CID; 3

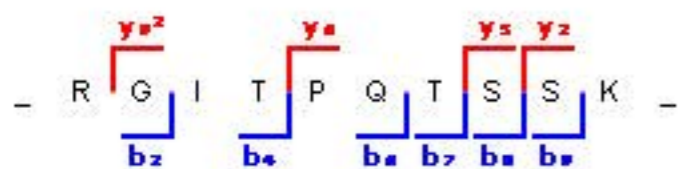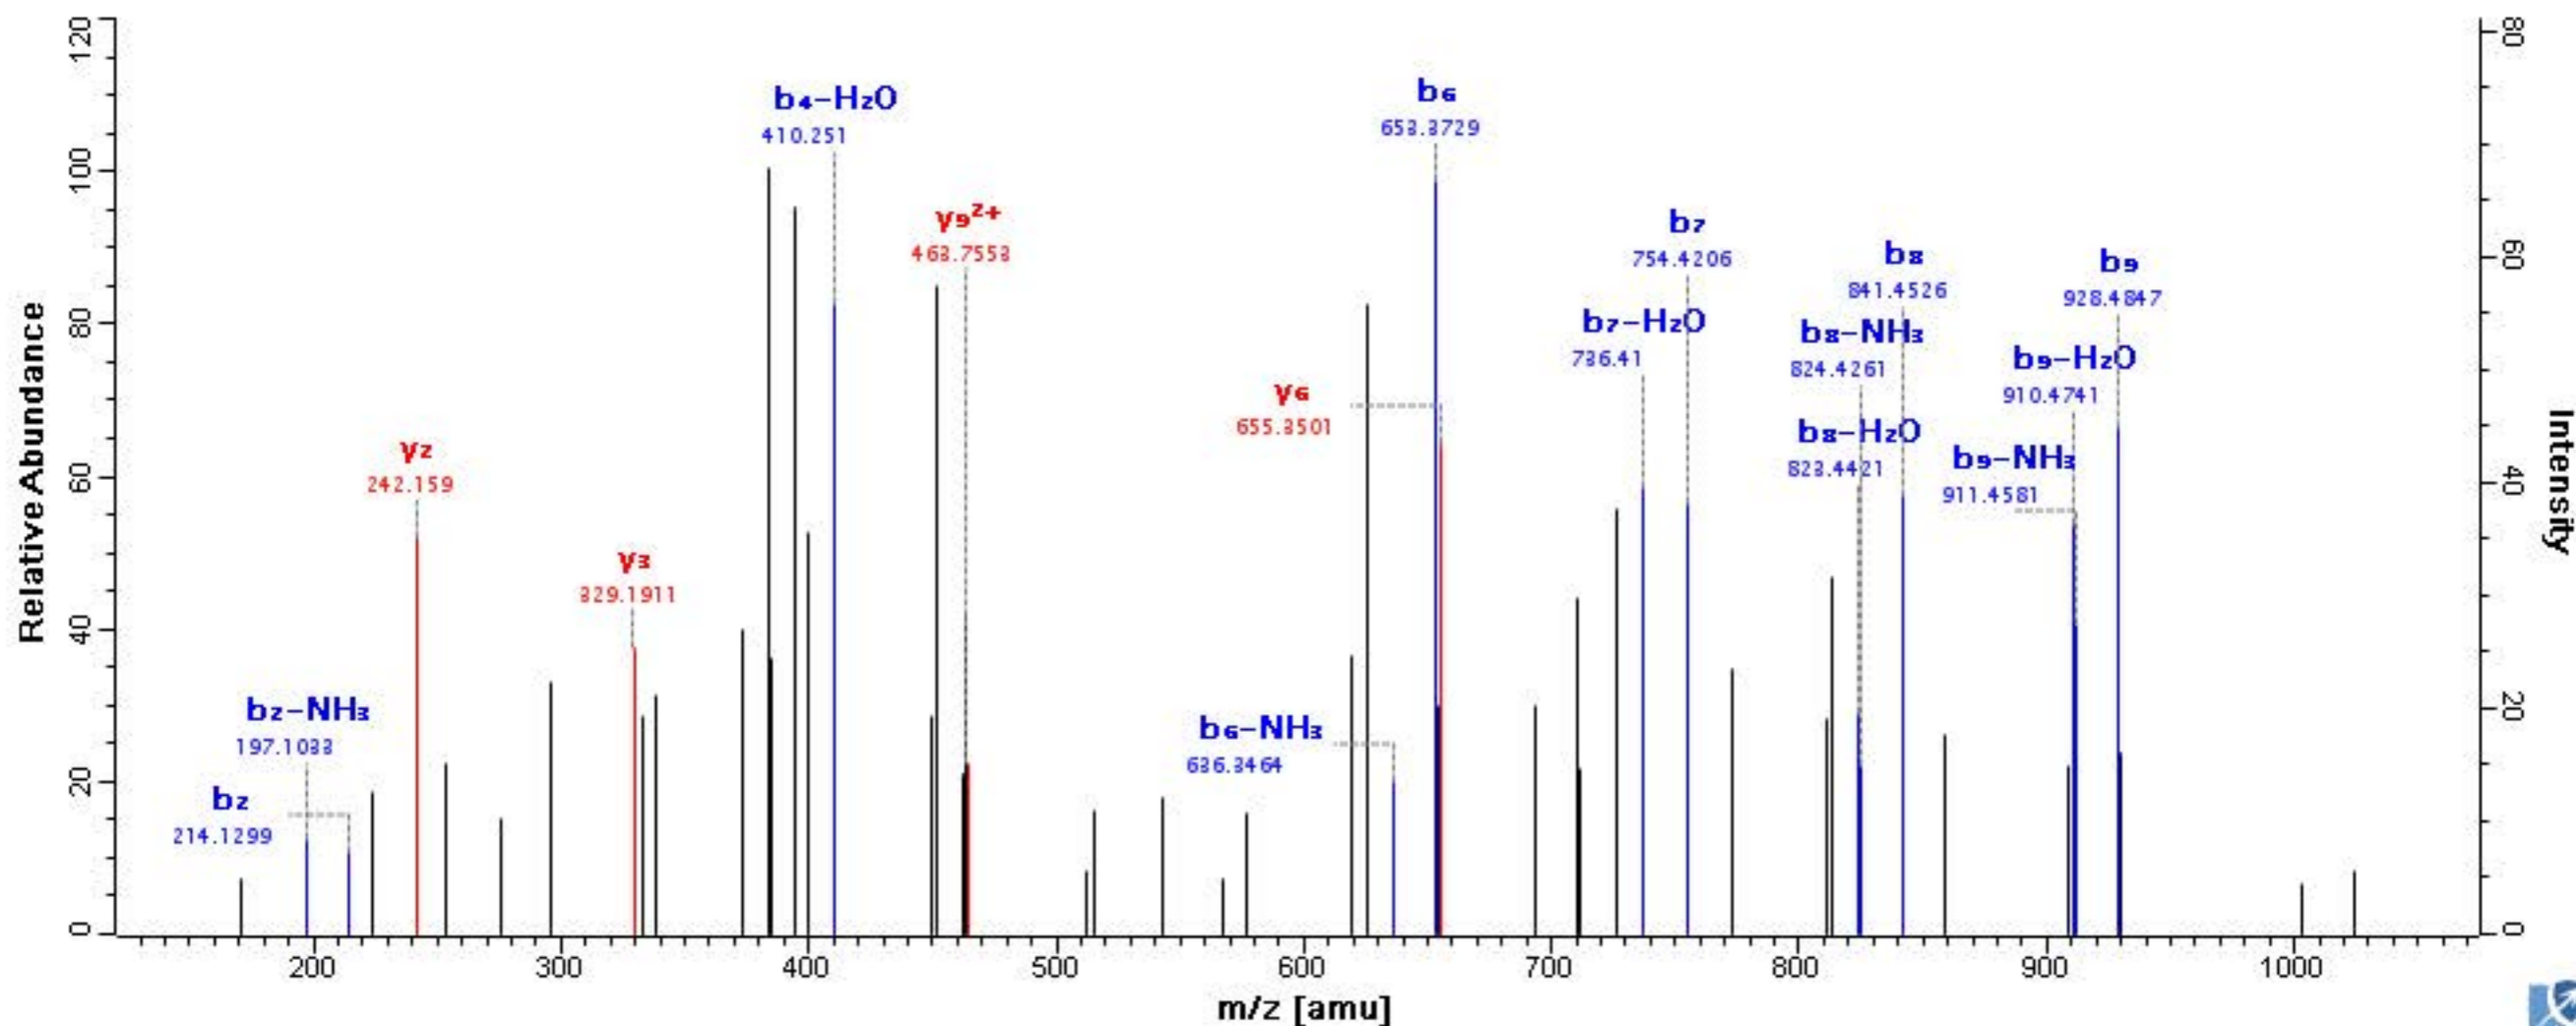

#### precursor information

|                   |                     |
|-------------------|---------------------|
| Mass:             | 1073.58242          |
| m/z:              | System.Collections. |
| Charge:           | System.Collections. |
| Retentiontime:    | System.Collections. |
| Score:            | 97.56528            |
| Mass Error [ppm]: | -0.46674            |
| PEP:              | 0.00085617          |
| Precursor Type:   | MULTI               |

#### general information

|                       |             |
|-----------------------|-------------|
| Annotation:           | 7 of 10     |
| AminoAcids Coverage:  | 70 %        |
| Intensity Coverage:   | 39 %        |
| Protein Localisation: | 165 ... 174 |

| b ion      |              |    |     |   | y ion        |            | y <sup>2+</sup> ion |            |
|------------|--------------|----|-----|---|--------------|------------|---------------------|------------|
| Δ dalton   | mass         |    | seq |   | Δ dalton     | mass       | Δ dalton            | mass       |
|            | 157.10838749 | 1  | R   | 9 |              |            |                     |            |
| -0.0234364 | 214.12985122 | 2  | G   | 8 | 926.50328582 |            | 463.75528114        | +0.2861007 |
|            | 327.2139152  | 3  | I   | 7 | 869.4818221  |            | 869.4818221         |            |
|            | 428.26159367 | 4  | T   | 6 | 756.39775812 |            | 756.39775812        |            |
|            | 525.31435752 | 5  | P   | 5 | 655.35007964 | +0.0656308 | 655.35007964        |            |
| +0.1111348 | 653.37293504 | 6  | Q   | 4 | 558.29731579 |            | 558.29731579        |            |
| +0.0001629 | 754.42061351 | 7  | T   | 3 | 430.23873828 |            | 430.23873828        |            |
| -0.0364432 | 841.45264192 | 8  | S   | 2 | 329.1910598  | +0.1201585 | 329.1910598         |            |
| +0.0260108 | 928.48467033 | 9  | S   | 1 | 242.15903139 | +0.018764  | 242.15903139        |            |
|            |              | 10 | K   | 0 | 155.12700298 |            | 155.12700298        |            |

Source: 20120514\_VR\_Bsu\_TripleSILACrep1\_pL2ESLS\_F20  
 Scannumber: 8919  
 Protein: BSU40740; yyaR  
 Peptide Score: 328.73  
 Method: ITMS; CID; 3

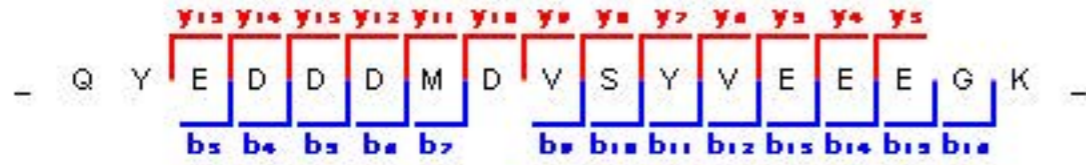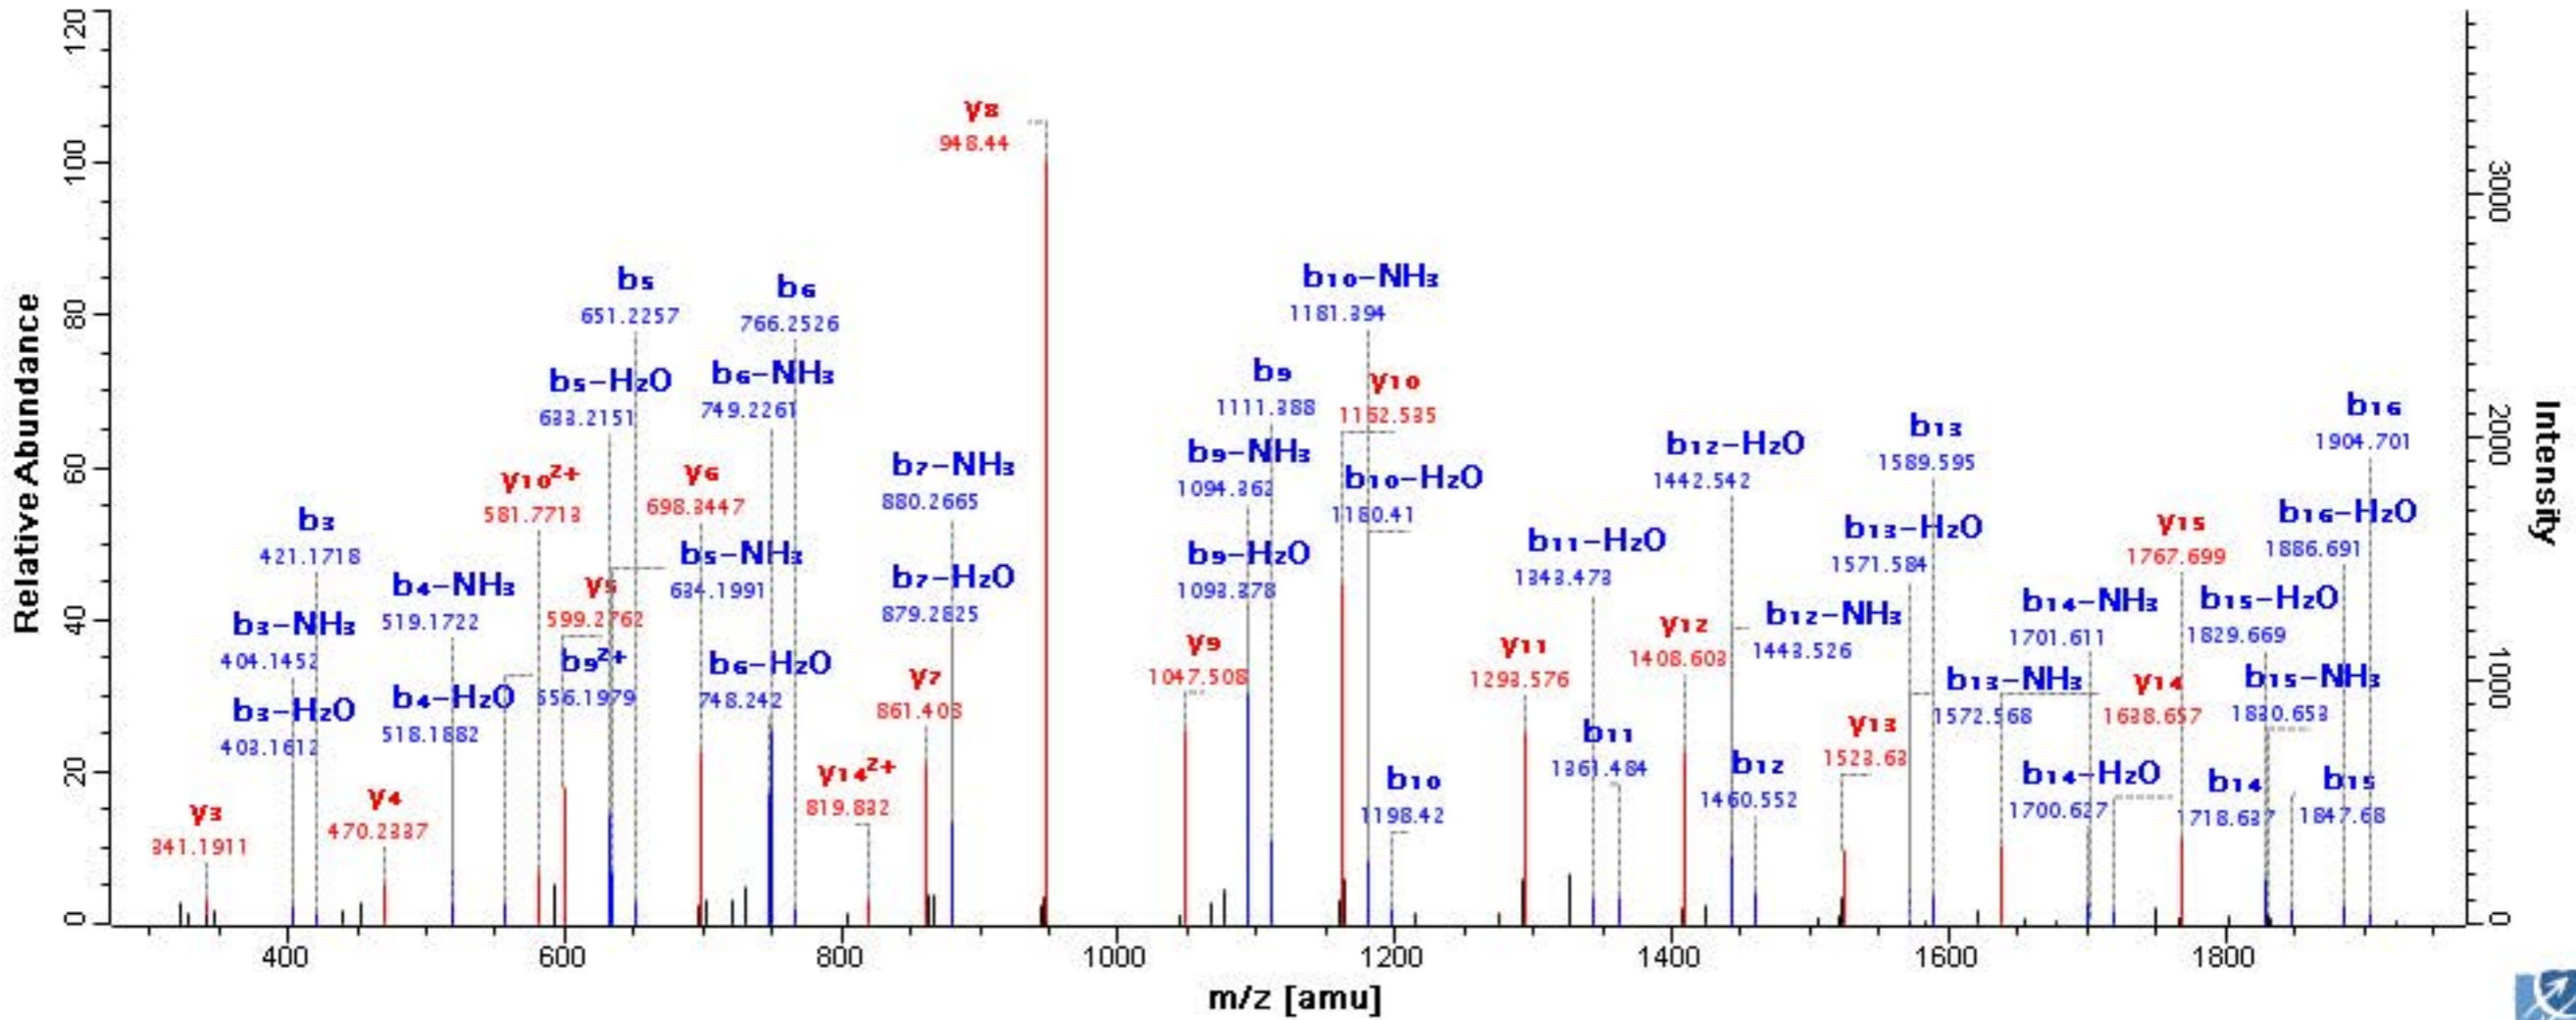

**precursor information**

|                   |                     |
|-------------------|---------------------|
| Mass:             | 2049.79959          |
| m/z:              | System.Collections. |
| Charge:           | System.Collections. |
| Retentiontime:    | System.Collections. |
| Score:            | 328.7328            |
| Mass Error [ppm]: | -0.060873           |
| PEP:              | 2.3161E-255         |
| Precursor Type:   | MULTI               |

| b <sup>2+</sup> ion |          | b ion     |          | seq |   |    | γ ion    |           | γ <sup>2+</sup> ion |           |
|---------------------|----------|-----------|----------|-----|---|----|----------|-----------|---------------------|-----------|
| Δ dalton            | mass     | Δ dalton  | mass     |     |   |    | Δ dalton | mass      | Δ dalton            | mass      |
|                     | 129.0659 |           | 129.0659 | 1   | Q | 16 |          |           |                     |           |
|                     | 292.1292 |           | 292.1292 | 2   | Y | 15 | 1930.763 |           | 1930.763            |           |
|                     | 421.1718 | -0.145164 | 421.1718 | 3   | E | 14 | 1767.699 | +0.05194  | 1767.699            |           |
|                     | 536.1987 |           | 536.1987 | 4   | D | 13 | 1638.657 | +0.18694  | 819.832             | -0.055493 |
|                     | 651.2257 | +0.10344  | 651.2257 | 5   | D | 12 | 1523.63  | +0.193864 | 1523.63             |           |
|                     | 766.2526 | -0.053325 | 766.2526 | 6   | D | 11 | 1408.603 | +0.045636 | 1408.603            |           |
|                     | 897.2931 |           | 897.2931 | 7   | M | 10 | 1293.576 | +0.159493 | 1293.576            |           |
|                     | 1012.32  |           | 1012.32  | 8   | D | 9  | 1162.535 | -0.041599 | 581.7713            | -0.456262 |
| +0.152603           | 556.1979 | +0.050641 | 1111.388 | 9   | V | 8  | 1047.508 | -0.035286 | 1047.508            |           |
|                     | 1198.42  | +0.067562 | 1198.42  | 10  | S | 7  | 948.44   | +0.030564 | 948.44              |           |
|                     | 1361.484 | +0.151207 | 1361.484 | 11  | Y | 6  | 861.408  | +0.087739 | 861.408             |           |
|                     | 1460.552 | -0.044283 | 1460.552 | 12  | V | 5  | 698.3447 | +0.007452 | 698.3447            |           |
|                     | 1589.595 | -0.078575 | 1589.595 | 13  | E | 4  | 599.2762 | +0.068358 | 599.2762            |           |
|                     | 1718.637 | -0.026808 | 1718.637 | 14  | E | 3  | 470.2337 | +0.046621 | 470.2337            |           |
|                     | 1847.68  | +0.196102 | 1847.68  | 15  | E | 2  | 341.1911 | +0.135295 | 341.1911            |           |
|                     | 1904.701 | +0.232988 | 1904.701 | 16  | G | 1  | 212.1485 |           | 212.1485            |           |
|                     |          |           |          | 17  | K | 0  | 155.127  |           | 155.127             |           |

**general information**

|                       |           |
|-----------------------|-----------|
| Annotation:           | 14 of 17  |
| AminoAcids Coverag    | 82 %      |
| Intensity Coverage:   | 83 %      |
| Protein Localisation: | 49 ... 65 |



Source: 20120521\_VR\_Bsu\_TripleSILACrep1\_L2ESLS\_OG\_F01  
 Scannumber: 10653  
 Protein: BSU05320; yde5  
 Peptide Score: 156.48  
 Method: ITMS; CID; 3

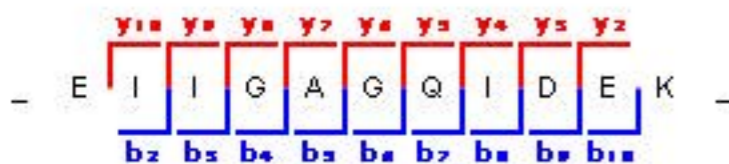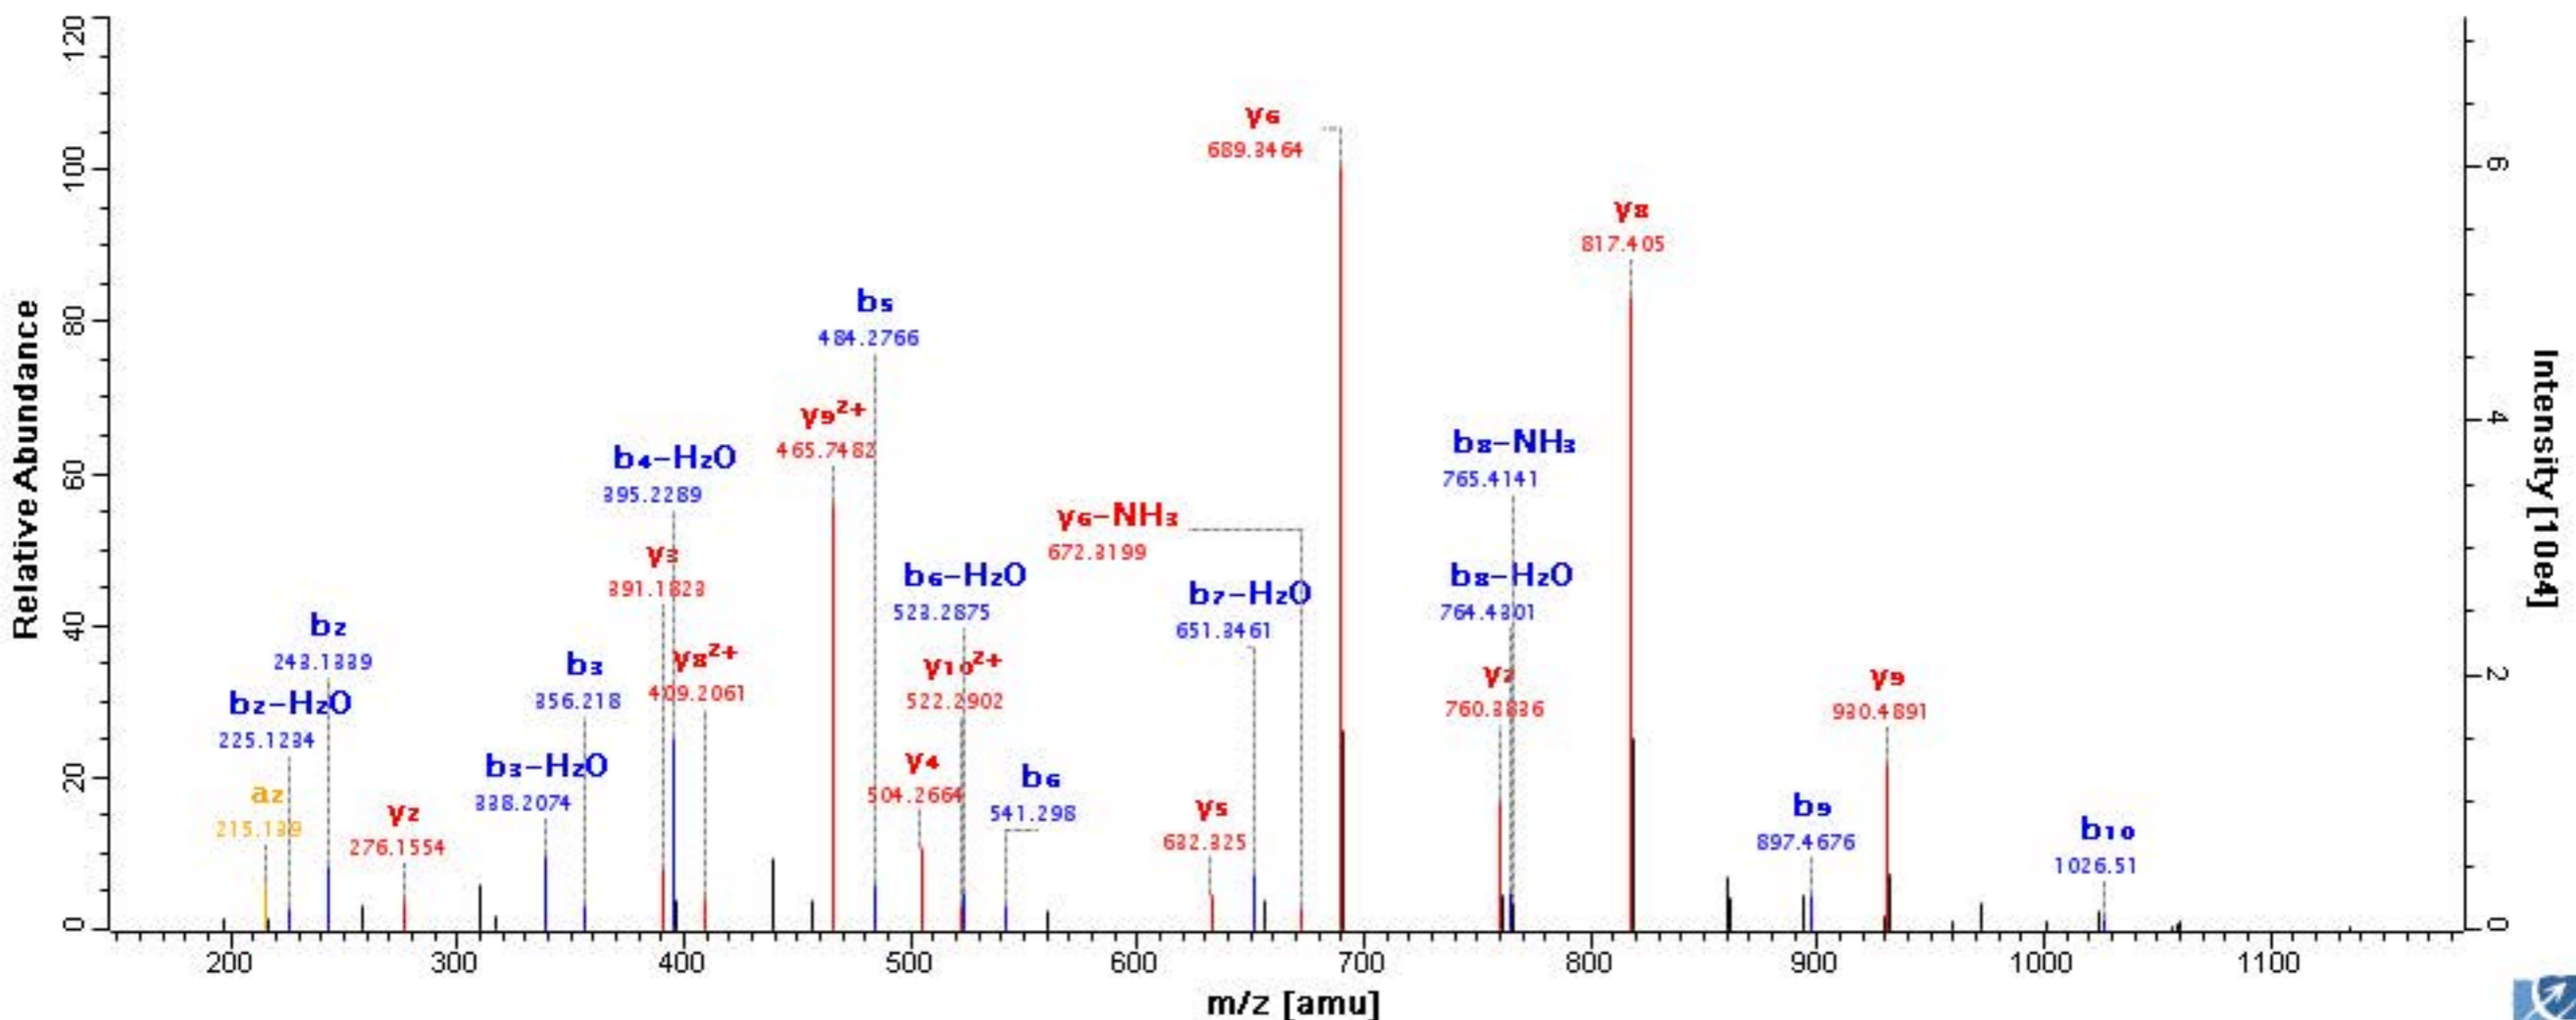

#### precursor information

|                   |                     |
|-------------------|---------------------|
| Mass:             | 1171.60736          |
| m/z:              | System.Collections. |
| Charge:           | System.Collections. |
| Retentiontime:    | System.Collections. |
| Score:            | 156.4802            |
| Mass Error [ppm]: | -0.94317            |
| PEP:              | 1.5294E-11          |
| Precursor Type:   | MULTI               |

#### general information

|                       |             |
|-----------------------|-------------|
| Annotation:           | 9 of 11     |
| AminoAcids Coverag    | 82 %        |
| Intensity Coverage:   | 76 %        |
| Protein Localisation: | 105 ... 115 |

| a ion     |          | b ion     |          |    |     |    | y ion    |           | y <sup>2+</sup> ion |           |
|-----------|----------|-----------|----------|----|-----|----|----------|-----------|---------------------|-----------|
| Δ dalton  | mass     | Δ dalton  | mass     |    | seq |    | Δ dalton | mass      | Δ dalton            | mass      |
|           | 102.055  |           | 130.0499 | 1  | E   | 10 |          |           |                     |           |
| -0.077236 | 215.139  | -0.00991  | 243.1339 | 2  | I   | 9  | 1043.573 |           | 522.2902            | +0.010079 |
|           | 328.2231 | +0.104268 | 356.218  | 3  | I   | 8  | 930.4891 | +0.106372 | 465.7482            | +0.308032 |
|           | 385.2445 |           | 413.2395 | 4  | G   | 7  | 817.405  | +0.06507  | 409.2061            | +0.219204 |
|           | 456.2817 | +0.150122 | 484.2766 | 5  | A   | 6  | 760.3836 | +0.020738 | 760.3836            |           |
|           | 513.3031 | +0.156063 | 541.298  | 6  | G   | 5  | 689.3464 | +0.031179 | 689.3464            |           |
|           | 641.3617 |           | 669.3566 | 7  | Q   | 4  | 632.325  | +0.136688 | 632.325             |           |
|           | 754.4458 |           | 782.4407 | 8  | I   | 3  | 504.2664 | +0.061049 | 504.2664            |           |
|           | 869.4727 | +0.129972 | 897.4676 | 9  | D   | 2  | 391.1823 | +0.00165  | 391.1823            |           |
|           | 998.5153 | +0.272865 | 1026.51  | 10 | E   | 1  | 276.1554 | +0.160734 | 276.1554            |           |
|           |          |           |          | 11 | K   | 0  | 147.1128 |           | 147.1128            |           |

Source: 20120521\_VR\_Bsu\_TripleSILACrep1\_L2ESLS\_OG\_F01  
 Scannumber: 13782  
 Protein: BSU14790; ylal  
 Peptide Score: 122.69  
 Method: ITMS; CID; 3

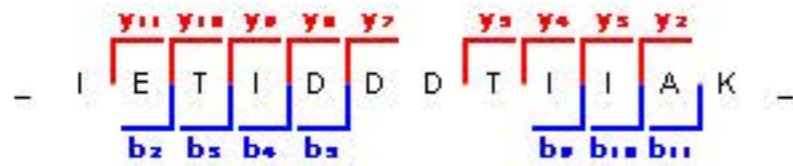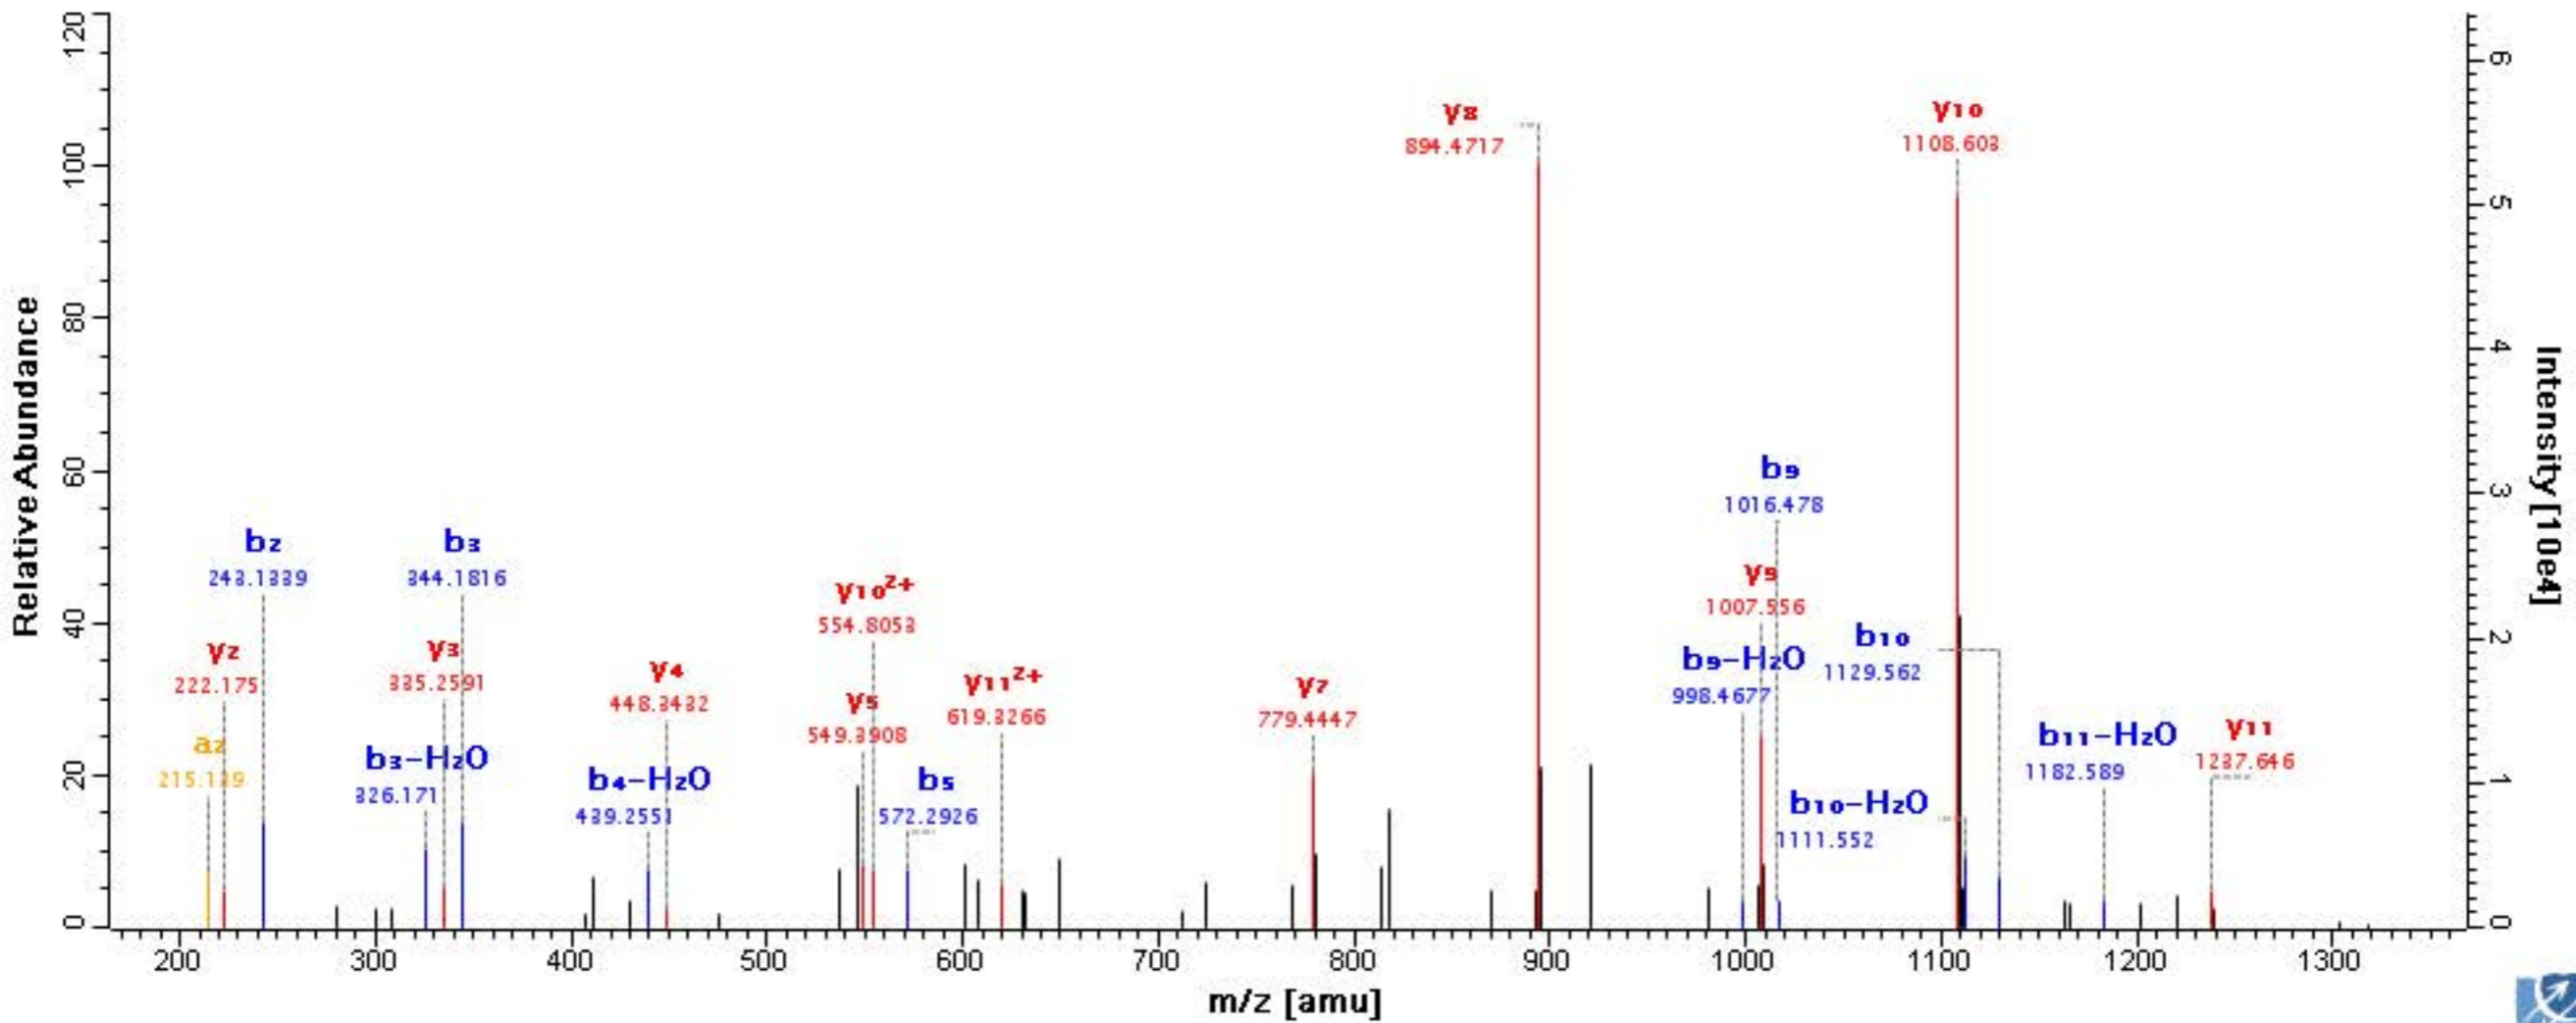

**precursor information**

|                   |                     |
|-------------------|---------------------|
| Mass:             | 1349.72412          |
| m/z:              | System.Collections. |
| Charge:           | System.Collections. |
| Retentiontime:    | System.Collections. |
| Score:            | 122.6907            |
| Mass Error [ppm]: | 0.99263             |
| PEP:              | 9.3994E-07          |
| Precursor Type:   | ISO                 |

**general information**

|                       |           |
|-----------------------|-----------|
| Annotation:           | 9 of 12   |
| AminoAcids Coverag    | 75 %      |
| Intensity Coverage:   | 54 %      |
| Protein Localisation: | 12 ... 23 |

| a ion     |          | b ion     |          |    |     |    | y ion    |           | y <sup>2+</sup> ion |           |
|-----------|----------|-----------|----------|----|-----|----|----------|-----------|---------------------|-----------|
| Δ dalton  | mass     | Δ dalton  | mass     |    | seq |    | Δ dalton | mass      | Δ dalton            | mass      |
|           | 86.09643 |           | 114.0913 | 1  | I   | 11 |          |           |                     |           |
| +0.033222 | 215.139  | -0.070549 | 243.1339 | 2  | E   | 10 | 1237.646 | -0.036377 | 619.3266            | +0.13955  |
|           | 316.1867 | +0.072783 | 344.1816 | 3  | T   | 9  | 1108.603 | +0.054434 | 554.8053            | -0.081646 |
|           | 429.2708 |           | 457.2657 | 4  | I   | 8  | 1007.556 | +0.128052 | 1007.556            |           |
|           | 544.2977 | +0.156172 | 572.2926 | 5  | D   | 7  | 894.4717 | +0.058735 | 894.4717            |           |
|           | 659.3246 |           | 687.3196 | 6  | D   | 6  | 779.4447 | +0.09581  | 779.4447            |           |
|           | 774.3516 |           | 802.3465 | 7  | D   | 5  | 664.4178 |           | 664.4178            |           |
|           | 875.3993 |           | 903.3942 | 8  | T   | 4  | 549.3908 | +0.000831 | 549.3908            |           |
|           | 988.4833 | +0.097741 | 1016.478 | 9  | I   | 3  | 448.3432 | +0.048632 | 448.3432            |           |
|           | 1101.567 | +0.10346  | 1129.562 | 10 | I   | 2  | 335.2591 | +0.111761 | 335.2591            |           |
|           | 1172.605 |           | 1200.599 | 11 | A   | 1  | 222.175  | -0.122947 | 222.175             |           |
|           |          |           |          | 12 | K   | 0  | 151.1379 |           | 151.1379            |           |

Source: 20120521\_VR\_Bsu\_TripleSILACrep1\_L2ESLS\_OG\_F01  
 Scannumber: 14526  
 Protein: BSU31850; yueC  
 Peptide Score: 78.5  
 Method: ITMS; CID; 3

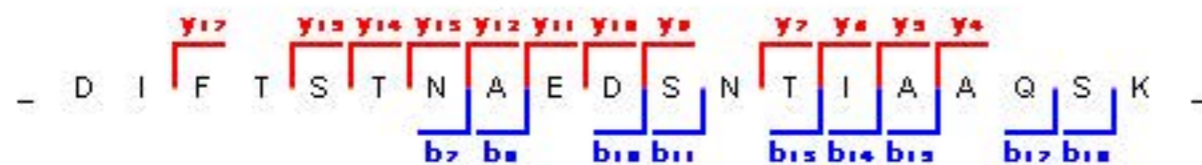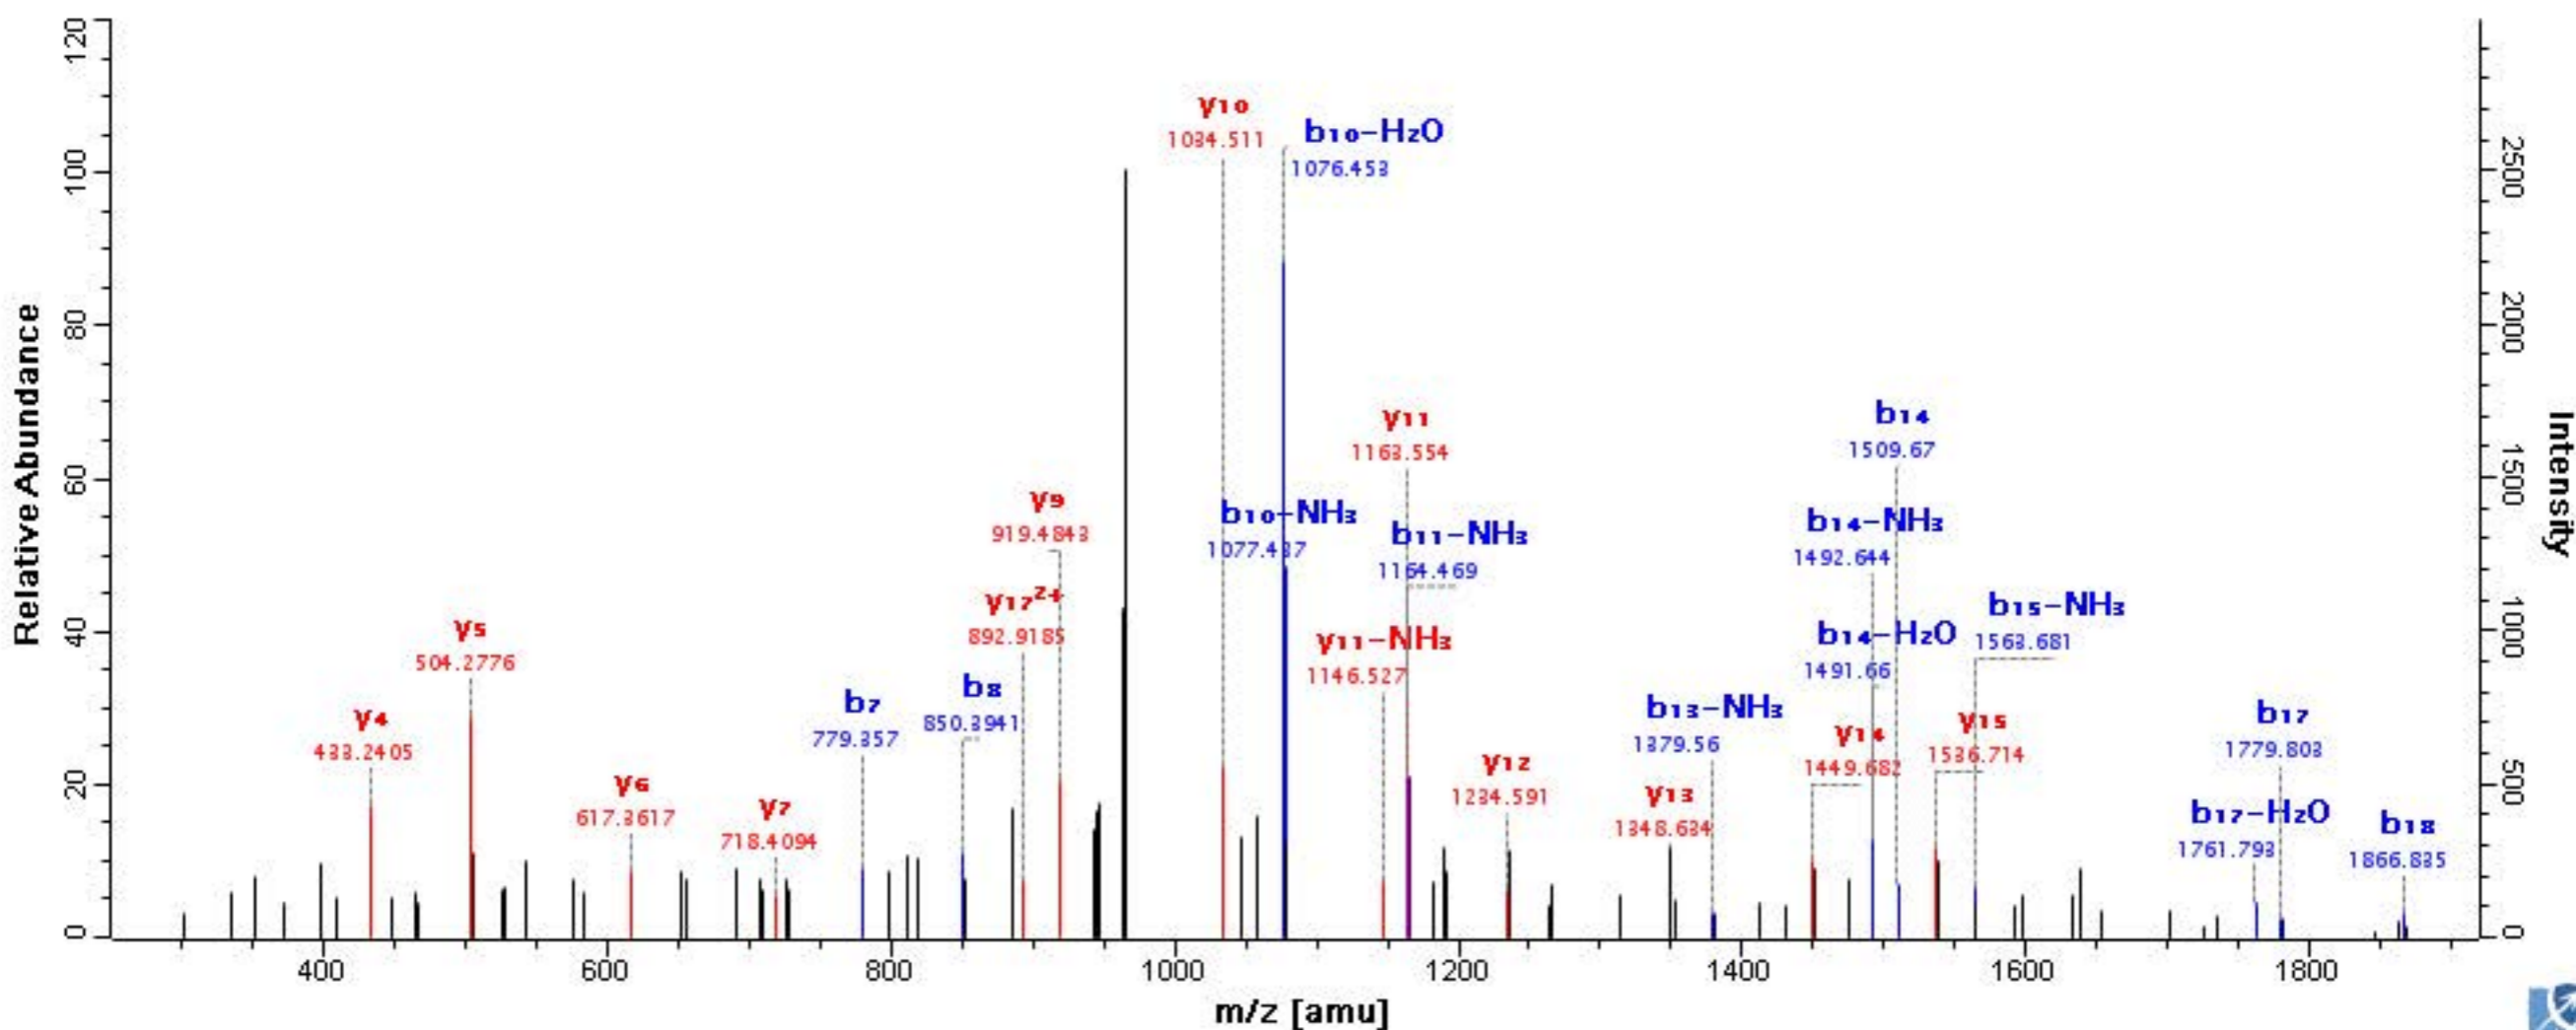

**precursor information**

|                   |                     |
|-------------------|---------------------|
| Mass:             | 2011.93368          |
| m/z:              | System.Collections. |
| Charge:           | System.Collections. |
| Retentiontime:    | System.Collections. |
| Score:            | 78.50082            |
| Mass Error [ppm]: | 0.11824             |
| PEP:              | 0.00045801          |
| Precursor Type:   | ISO                 |

| b ion      |              |    |     |    | y ion        |            | y <sup>2+</sup> ion |           |
|------------|--------------|----|-----|----|--------------|------------|---------------------|-----------|
| Δ dalton   | mass         |    | seq |    | Δ dalton     | mass       | Δ dalton            | mass      |
|            | 116.0342195  | 1  | D   | 18 |              |            |                     |           |
|            | 229.11828348 | 2  | I   | 17 | 1897.9137766 |            | 1897.9137766        |           |
|            | 376.1866974  | 3  | F   | 16 | 1784.8297126 |            | 892.91849454        | -0.417518 |
|            | 477.23437587 | 4  | T   | 15 | 1637.7612987 |            | 1637.7612987        |           |
|            | 564.26640428 | 5  | S   | 14 | 1536.7136202 | +0.0810575 | 1536.7136202        |           |
|            | 665.31408275 | 6  | T   | 13 | 1449.6815918 | +0.0352051 | 1449.6815918        |           |
| +0.065231  | 779.3570102  | 7  | N   | 12 | 1348.6339133 | +0.1562478 | 1348.6339133        |           |
| +0.1871748 | 850.39412399 | 8  | A   | 11 | 1234.5909859 | -0.0298287 | 1234.5909859        |           |
|            | 979.43671708 | 9  | E   | 10 | 1163.5538721 | -0.0804834 | 1163.5538721        |           |
|            | 1094.4636601 | 10 | D   | 9  | 1034.511279  | +0.0757571 | 1034.511279         |           |
|            | 1181.4956885 | 11 | S   | 8  | 919.48433598 | -0.0557471 | 919.48433598        |           |
|            | 1295.538616  | 12 | N   | 7  | 832.45230757 |            | 832.45230757        |           |
|            | 1396.5862944 | 13 | T   | 6  | 718.40938012 | +0.1532419 | 718.40938012        |           |
| +0.0946562 | 1509.6703584 | 14 | I   | 5  | 617.36170165 | +0.1087573 | 617.36170165        |           |
|            | 1580.7074722 | 15 | A   | 4  | 504.27763767 | -0.0399057 | 504.27763767        |           |
|            | 1651.744586  | 16 | A   | 3  | 433.24052388 | -0.0702358 | 433.24052388        |           |
| -0.0095844 | 1779.8031635 | 17 | Q   | 2  | 362.20341009 |            | 362.20341009        |           |
| -0.1724722 | 1866.8351919 | 18 | S   | 1  | 234.14483258 |            | 234.14483258        |           |
|            |              | 19 | K   | 0  | 147.11280417 |            | 147.11280417        |           |

**general information**

|                       |           |
|-----------------------|-----------|
| Annotation:           | 14 of 19  |
| AminoAcids Coverag    | 74%       |
| Intensity Coverage:   | 40%       |
| Protein Localisation: | 73 ... 91 |

Source: 20120521\_VR\_Bsu\_TripleSILACrep1\_L2ESLS\_OG\_F01  
 Scannumber: 20185  
 Protein: BSU39200; yxzC  
 Peptide Score: 109.83  
 Method: ITMS; CID; 3

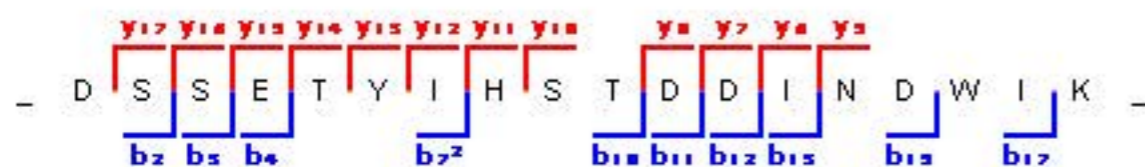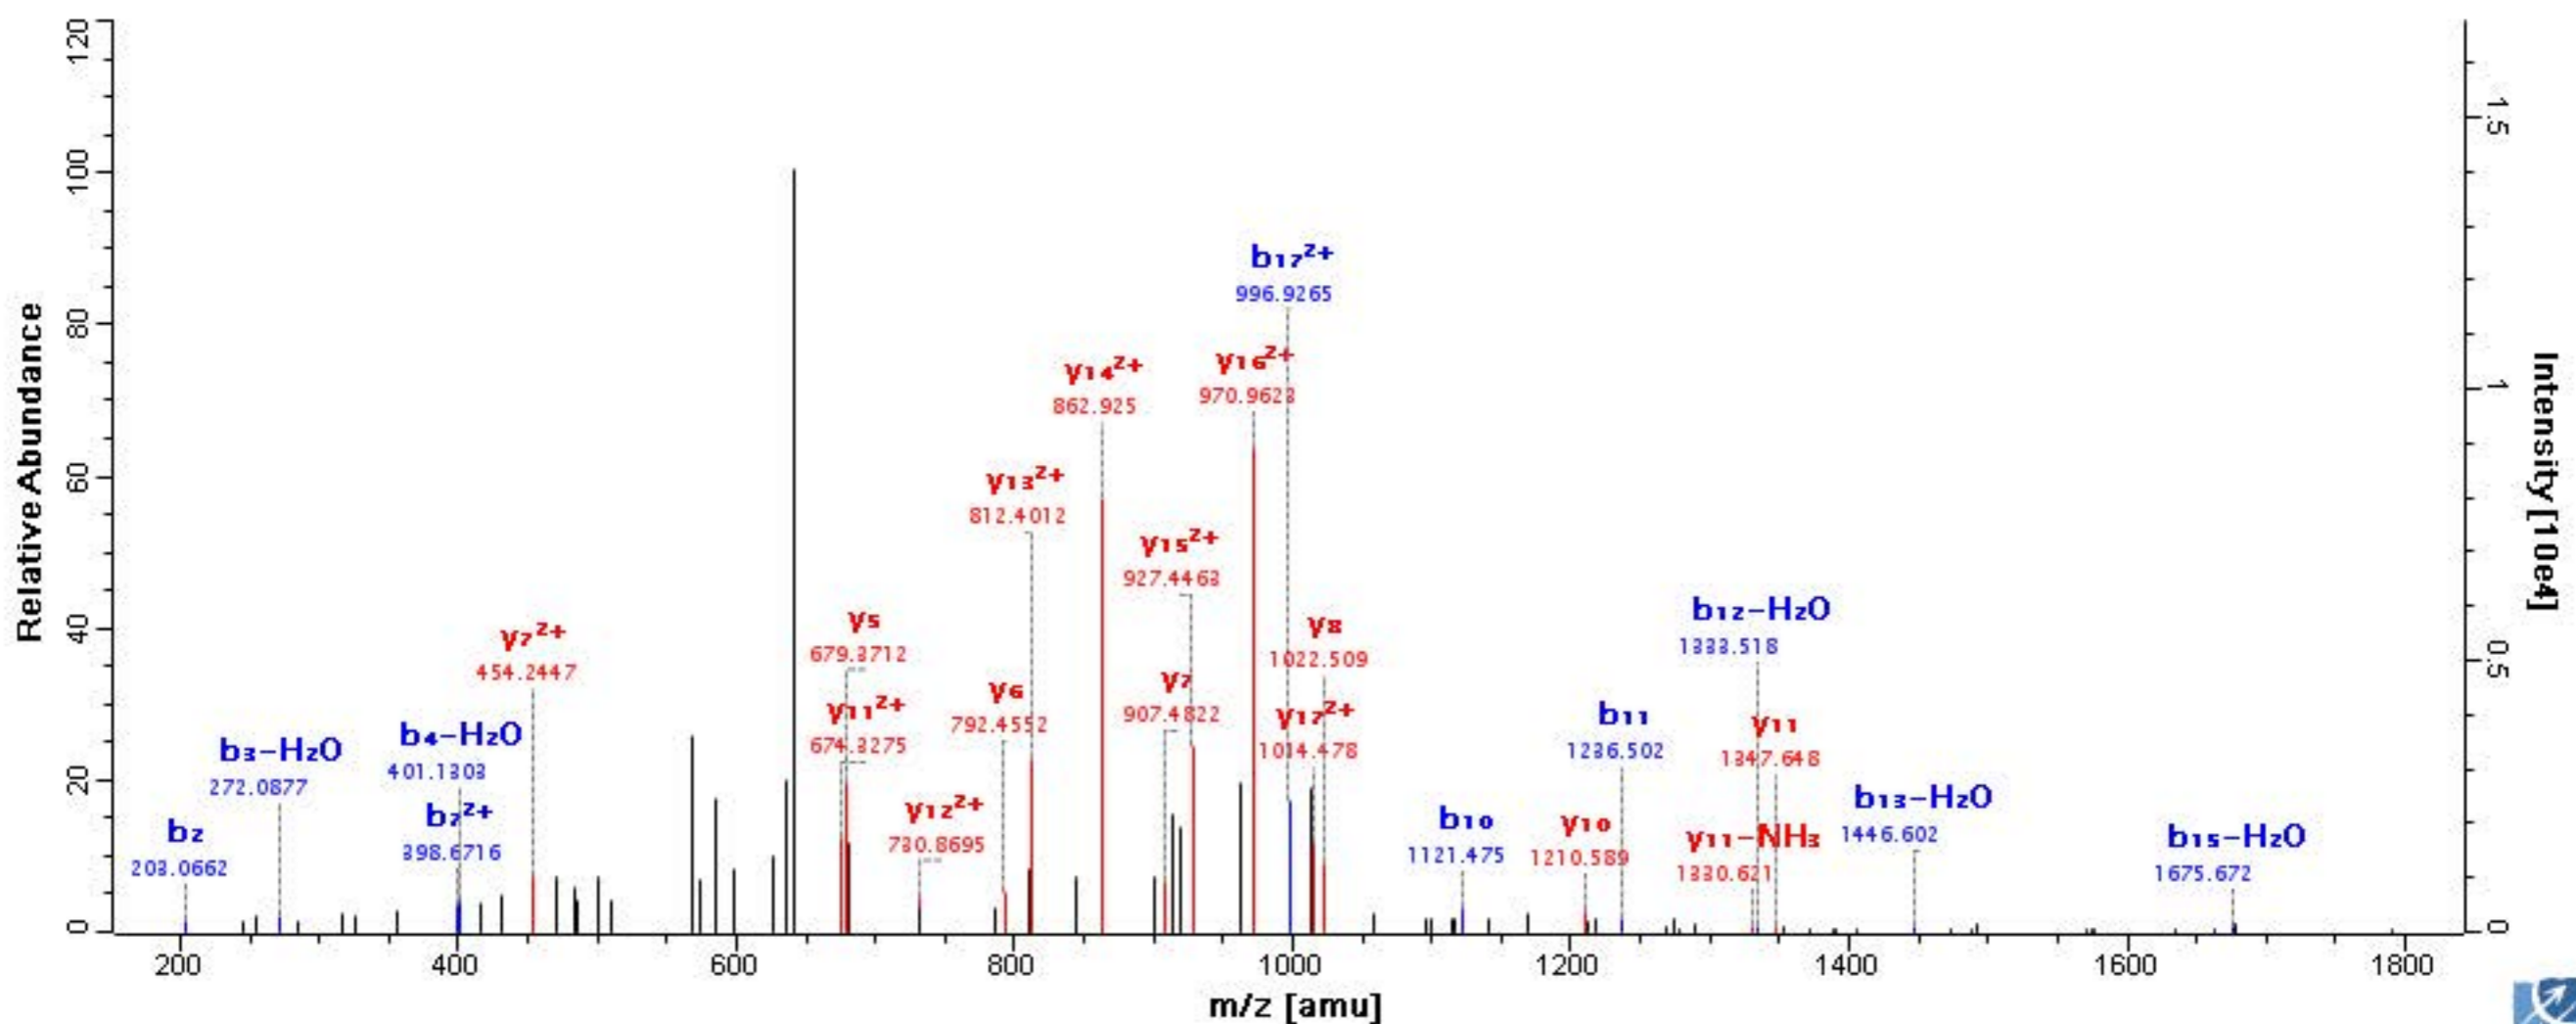

#### precursor information

|                   |                     |
|-------------------|---------------------|
| Mass:             | 2137.94461          |
| m/z:              | System.Collections. |
| Charge:           | System.Collections. |
| Retentiontime:    | System.Collections. |
| Score:            | 109.8349            |
| Mass Error [ppm]: | 0.28169             |
| PEP:              | 2.155E-11           |
| Precursor Type:   | MULTI               |

| b <sup>2+</sup> ion |          | b ion     |          | seq |   |    | y ion    |           | y <sup>2+</sup> ion |           |
|---------------------|----------|-----------|----------|-----|---|----|----------|-----------|---------------------|-----------|
| Δ dalton            | mass     | Δ dalton  | mass     |     |   |    | Δ dalton | mass      | Δ dalton            | mass      |
|                     | 116.0342 |           | 116.0342 | 1   | D | 17 |          |           |                     |           |
|                     | 203.0662 | +0.085836 | 203.0662 | 2   | S | 16 | 2027.949 |           | 1014.478            | +0.280488 |
|                     | 290.0983 |           | 290.0983 | 3   | S | 15 | 1940.917 |           | 970.9623            | +0.303643 |
|                     | 419.1409 |           | 419.1409 | 4   | E | 14 | 1853.885 |           | 927.4463            | +0.431168 |
|                     | 520.1885 |           | 520.1885 | 5   | T | 13 | 1724.843 |           | 862.925             | +0.238659 |
|                     | 683.2519 |           | 683.2519 | 6   | Y | 12 | 1623.795 |           | 812.4012            | +0.337205 |
| -0.468667           | 398.6716 |           | 796.3359 | 7   | I | 11 | 1460.732 |           | 730.8695            | +0.093357 |
|                     | 933.3949 |           | 933.3949 | 8   | H | 10 | 1347.648 | +0.124489 | 674.3275            | +0.246106 |
|                     | 1020.427 |           | 1020.427 | 9   | S | 9  | 1210.589 | +0.037283 | 1210.589            |           |
|                     | 1121.475 | +0.285206 | 1121.475 | 10  | T | 8  | 1123.557 |           | 1123.557            |           |
|                     | 1236.502 | +0.105431 | 1236.502 | 11  | D | 7  | 1022.509 | +0.044053 | 1022.509            |           |
|                     | 1351.528 |           | 1351.528 | 12  | D | 6  | 907.4822 | +0.220105 | 454.2447            | +0.089141 |
|                     | 1464.613 |           | 1464.613 | 13  | I | 5  | 792.4552 | +0.197671 | 792.4552            |           |
|                     | 1578.655 |           | 1578.655 | 14  | N | 4  | 679.3712 | +0.035763 | 679.3712            |           |
|                     | 1693.682 |           | 1693.682 | 15  | D | 3  | 565.3282 |           | 565.3282            |           |
|                     | 1879.762 |           | 1879.762 | 16  | W | 2  | 450.3013 |           | 450.3013            |           |
| +0.392209           | 996.9265 |           | 1992.846 | 17  | I | 1  | 264.222  |           | 264.222             |           |
|                     |          |           |          | 18  | K | 0  | 151.1379 |           | 151.1379            |           |

#### general information

|                       |             |
|-----------------------|-------------|
| Annotation:           | 15 of 18    |
| AminoAcids Coverag    | 83 %        |
| Intensity Coverage:   | 42 %        |
| Protein Localisation: | 101 ... 118 |

Source: 20120521\_VR\_Bsu\_TripleSILACrep1\_L2ESLS\_OG\_F01  
 Scannumber: 9250  
 Protein: BSU39410; nupC  
 Peptide Score: 130.01  
 Method: ITMS; CID; 3

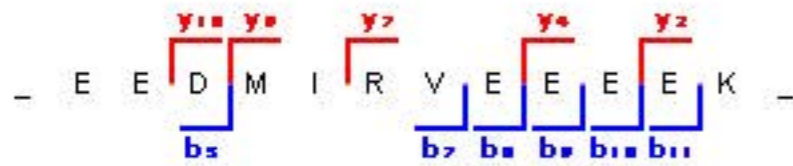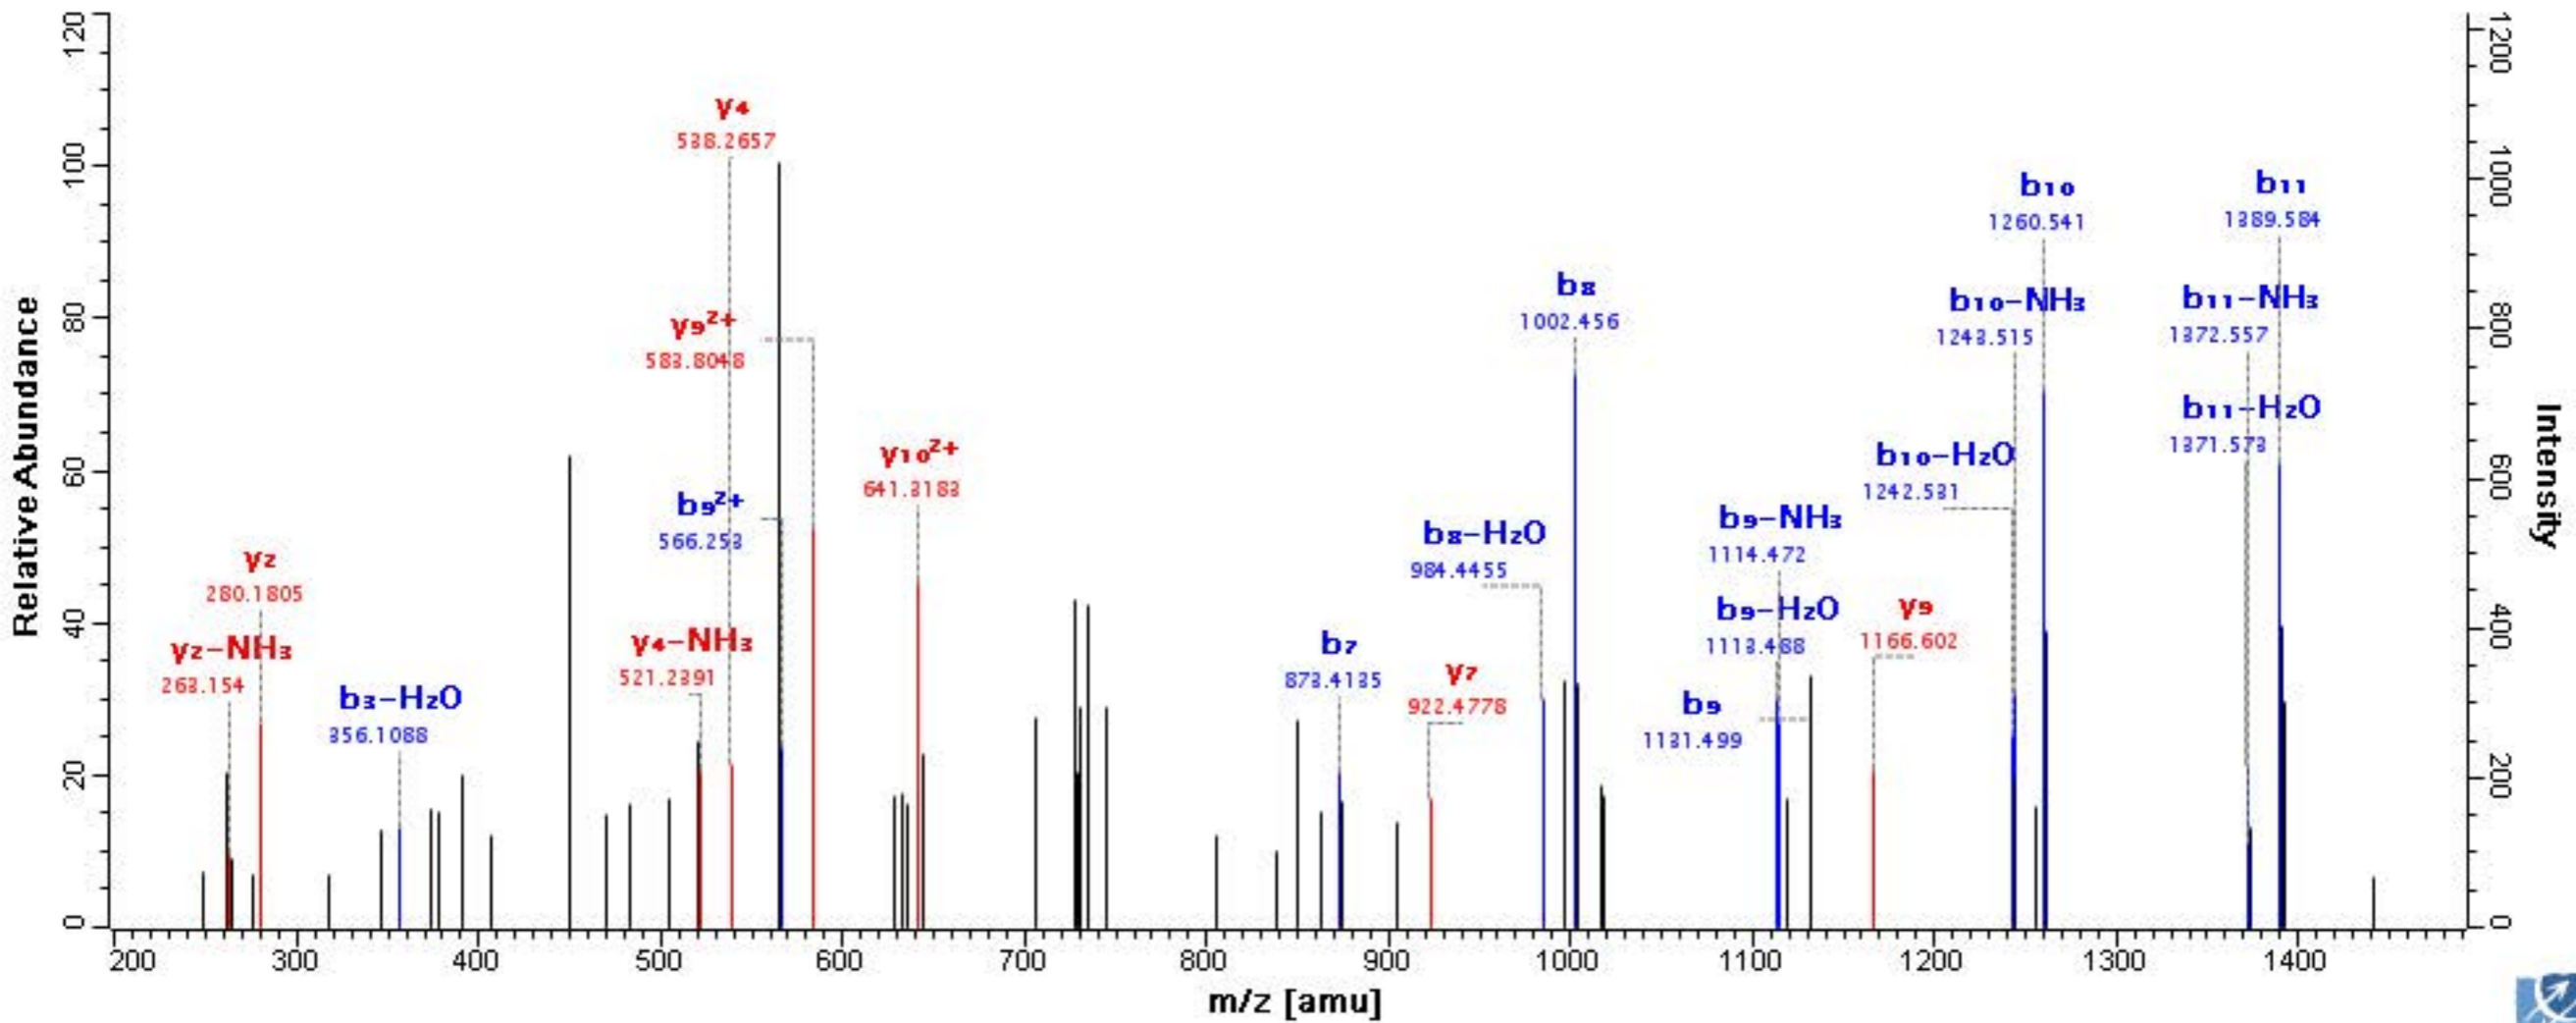

#### precursor information

|                   |                     |
|-------------------|---------------------|
| Mass:             | 1538.7077           |
| m/z:              | System.Collections. |
| Charge:           | System.Collections. |
| Retentiontime:    | System.Collections. |
| Score:            | 130.006             |
| Mass Error [ppm]: | 0.31733             |
| PEP:              | 0.0002665           |
| Precursor Type:   | ISO                 |

#### general information

|                       |             |
|-----------------------|-------------|
| Annotation:           | 8 of 12     |
| AminoAcids Coverag    | 67 %        |
| Intensity Coverage:   | 38 %        |
| Protein Localisation: | 219 ... 230 |

| b <sup>2+</sup> ion |          | b ion     |          |    |     |    | γ ion    |           | γ <sup>2+</sup> ion |           |
|---------------------|----------|-----------|----------|----|-----|----|----------|-----------|---------------------|-----------|
| Δ dalton            | mass     | Δ dalton  | mass     |    | seq |    | Δ dalton | mass      | Δ dalton            | mass      |
|                     | 130.0499 |           | 130.0499 | 1  | E   | 11 |          |           |                     |           |
|                     | 259.0925 |           | 259.0925 | 2  | E   | 10 | 1410.672 |           | 1410.672            |           |
|                     | 374.1194 |           | 374.1194 | 3  | D   | 9  | 1281.629 |           | 641.3183            | +0.178965 |
|                     | 505.1599 |           | 505.1599 | 4  | M   | 8  | 1166.602 | +0.204894 | 583.8048            | +0.217278 |
|                     | 618.244  |           | 618.244  | 5  | I   | 7  | 1035.562 |           | 1035.562            |           |
|                     | 774.3451 |           | 774.3451 | 6  | R   | 6  | 922.4778 | +0.251806 | 922.4778            |           |
|                     | 873.4135 | +0.087986 | 873.4135 | 7  | V   | 5  | 766.3767 |           | 766.3767            |           |
|                     | 1002.456 | +0.098371 | 1002.456 | 8  | E   | 4  | 667.3083 |           | 667.3083            |           |
| +0.108662           | 566.253  | +0.032951 | 1131.499 | 9  | E   | 3  | 538.2657 | +0.181392 | 538.2657            |           |
|                     | 1260.541 | +0.030519 | 1260.541 | 10 | E   | 2  | 409.2231 |           | 409.2231            |           |
|                     | 1389.584 | +0.057262 | 1389.584 | 11 | E   | 1  | 280.1805 | +0.16465  | 280.1805            |           |
|                     |          |           |          | 12 | K   | 0  | 151.1379 |           | 151.1379            |           |

Source: 20120521\_VR\_Bsu\_TripleSILACrep1\_L2ESLS\_OG\_F02  
 Scannumber: 11443  
 Protein: BSU06920; yeeN; yesJ; yfxC; yfxD  
 Peptide Score: 188.48  
 Method: ITMS; CID; 3

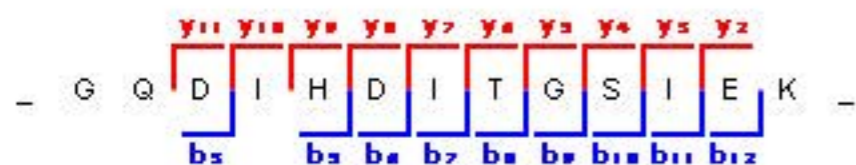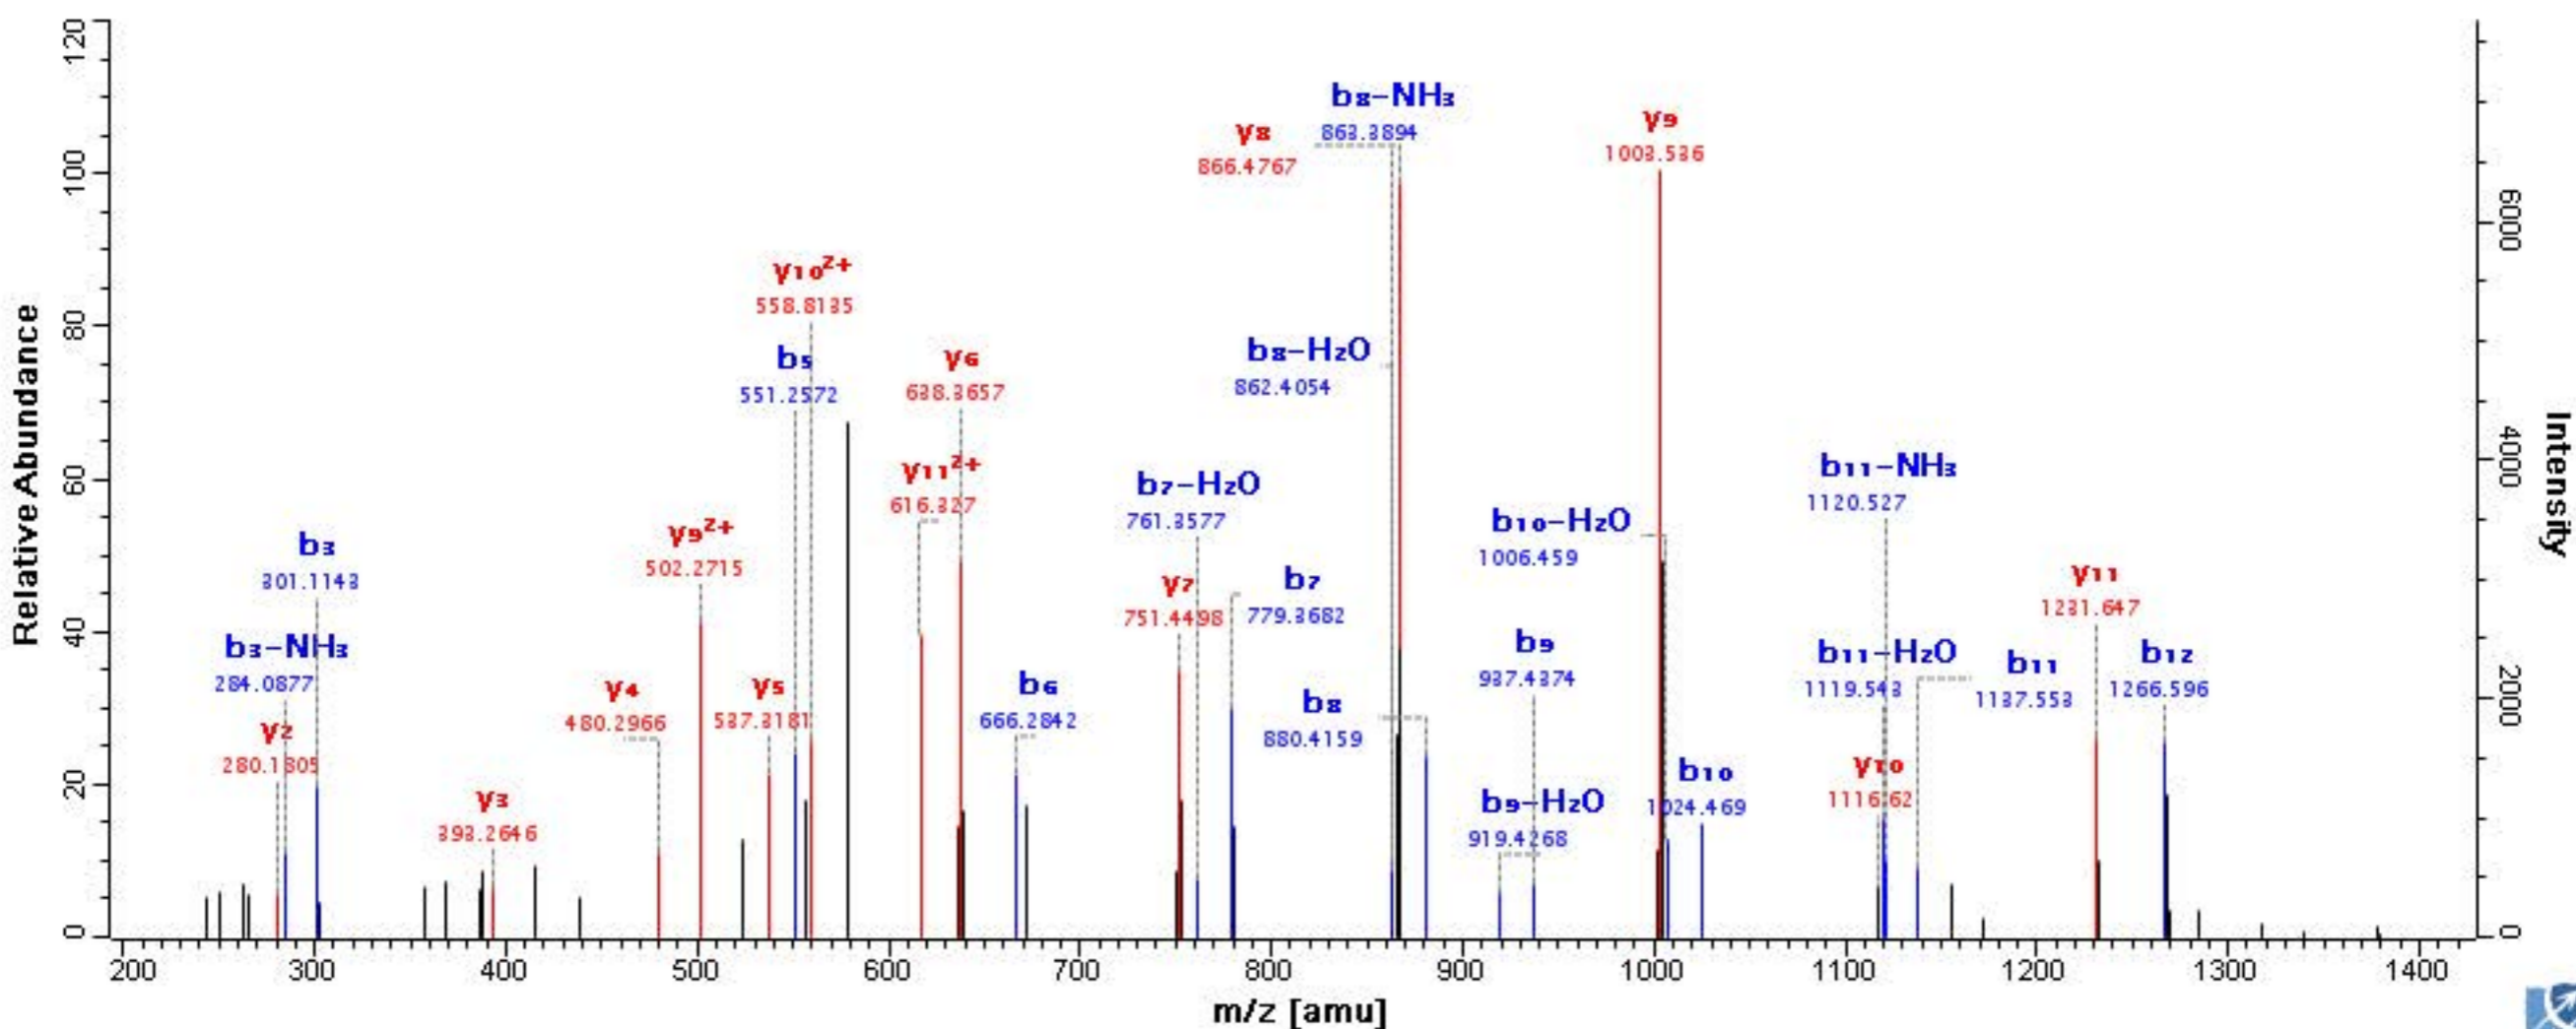

#### precursor information

|                   |                     |
|-------------------|---------------------|
| Mass:             | 1415.71963          |
| m/z:              | System.Collections. |
| Charge:           | System.Collections. |
| Retentiontime:    | System.Collections. |
| Score:            | 188.4789            |
| Mass Error [ppm]: | 0.14212             |
| PEP:              | 1.4842E-21          |
| Precursor Type:   | ISO                 |

#### general information

|                       |           |
|-----------------------|-----------|
| Annotation:           | 10 of 13  |
| AminoAcids Coverag    | 77 %      |
| Intensity Coverage:   | 61 %      |
| Protein Localisation: | 53 ... 65 |

| b ion      |              |    |     |    | gamma ion    |            |              | gamma <sup>2+</sup> ion |  |
|------------|--------------|----|-----|----|--------------|------------|--------------|-------------------------|--|
| Δ dalton   | mass         |    | seq |    | Δ dalton     | mass       | Δ dalton     | mass                    |  |
|            | 58.02874019  | 1  | G   | 12 |              |            |              |                         |  |
|            | 186.0873177  | 2  | Q   | 11 | 1359.7052422 |            | 1359.7052422 |                         |  |
| -0.0762358 | 301.11426073 | 3  | D   | 10 | 1231.6466647 | +0.0669583 | 616.3269706  | +0.1256661              |  |
|            | 414.19832471 | 4  | I   | 9  | 1116.6197217 | +0.0240771 | 558.81349908 | +0.3426899              |  |
| +0.0374412 | 551.25723658 | 5  | H   | 8  | 1003.5356577 | +0.03673   | 502.27146709 | +0.0566579              |  |
| -0.0008544 | 666.28417961 | 6  | D   | 7  | 866.47674585 | +0.031738  | 866.47674585 |                         |  |
| +0.0290342 | 779.36824359 | 7  | I   | 6  | 751.44980282 | +0.0129657 | 751.44980282 |                         |  |
| +0.0190755 | 880.41592206 | 8  | T   | 5  | 638.36573884 | -0.0016641 | 638.36573884 |                         |  |
| +0.2665327 | 937.43738579 | 9  | G   | 4  | 537.31806036 | -0.0067811 | 537.31806036 |                         |  |
| +0.0895458 | 1024.4694142 | 10 | S   | 3  | 480.29659664 | -0.07156   | 480.29659664 |                         |  |
| +0.1323128 | 1137.5534782 | 11 | I   | 2  | 393.26456823 | +0.1312448 | 393.26456823 |                         |  |
| +0.0892315 | 1266.5960713 | 12 | E   | 1  | 280.18050425 | -0.058617  | 280.18050425 |                         |  |
|            |              | 13 | K   | 0  | 151.13791115 |            | 151.13791115 |                         |  |

Source: 20120521\_VR\_Bsu\_TripleSILACrep1\_L2ESLS\_OG\_F02  
 Scannumber: 15763  
 Protein: BSU12069; yjzH  
 Peptide Score: 174.77  
 Method: ITMS; CID; 3

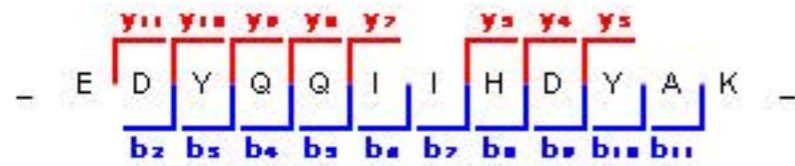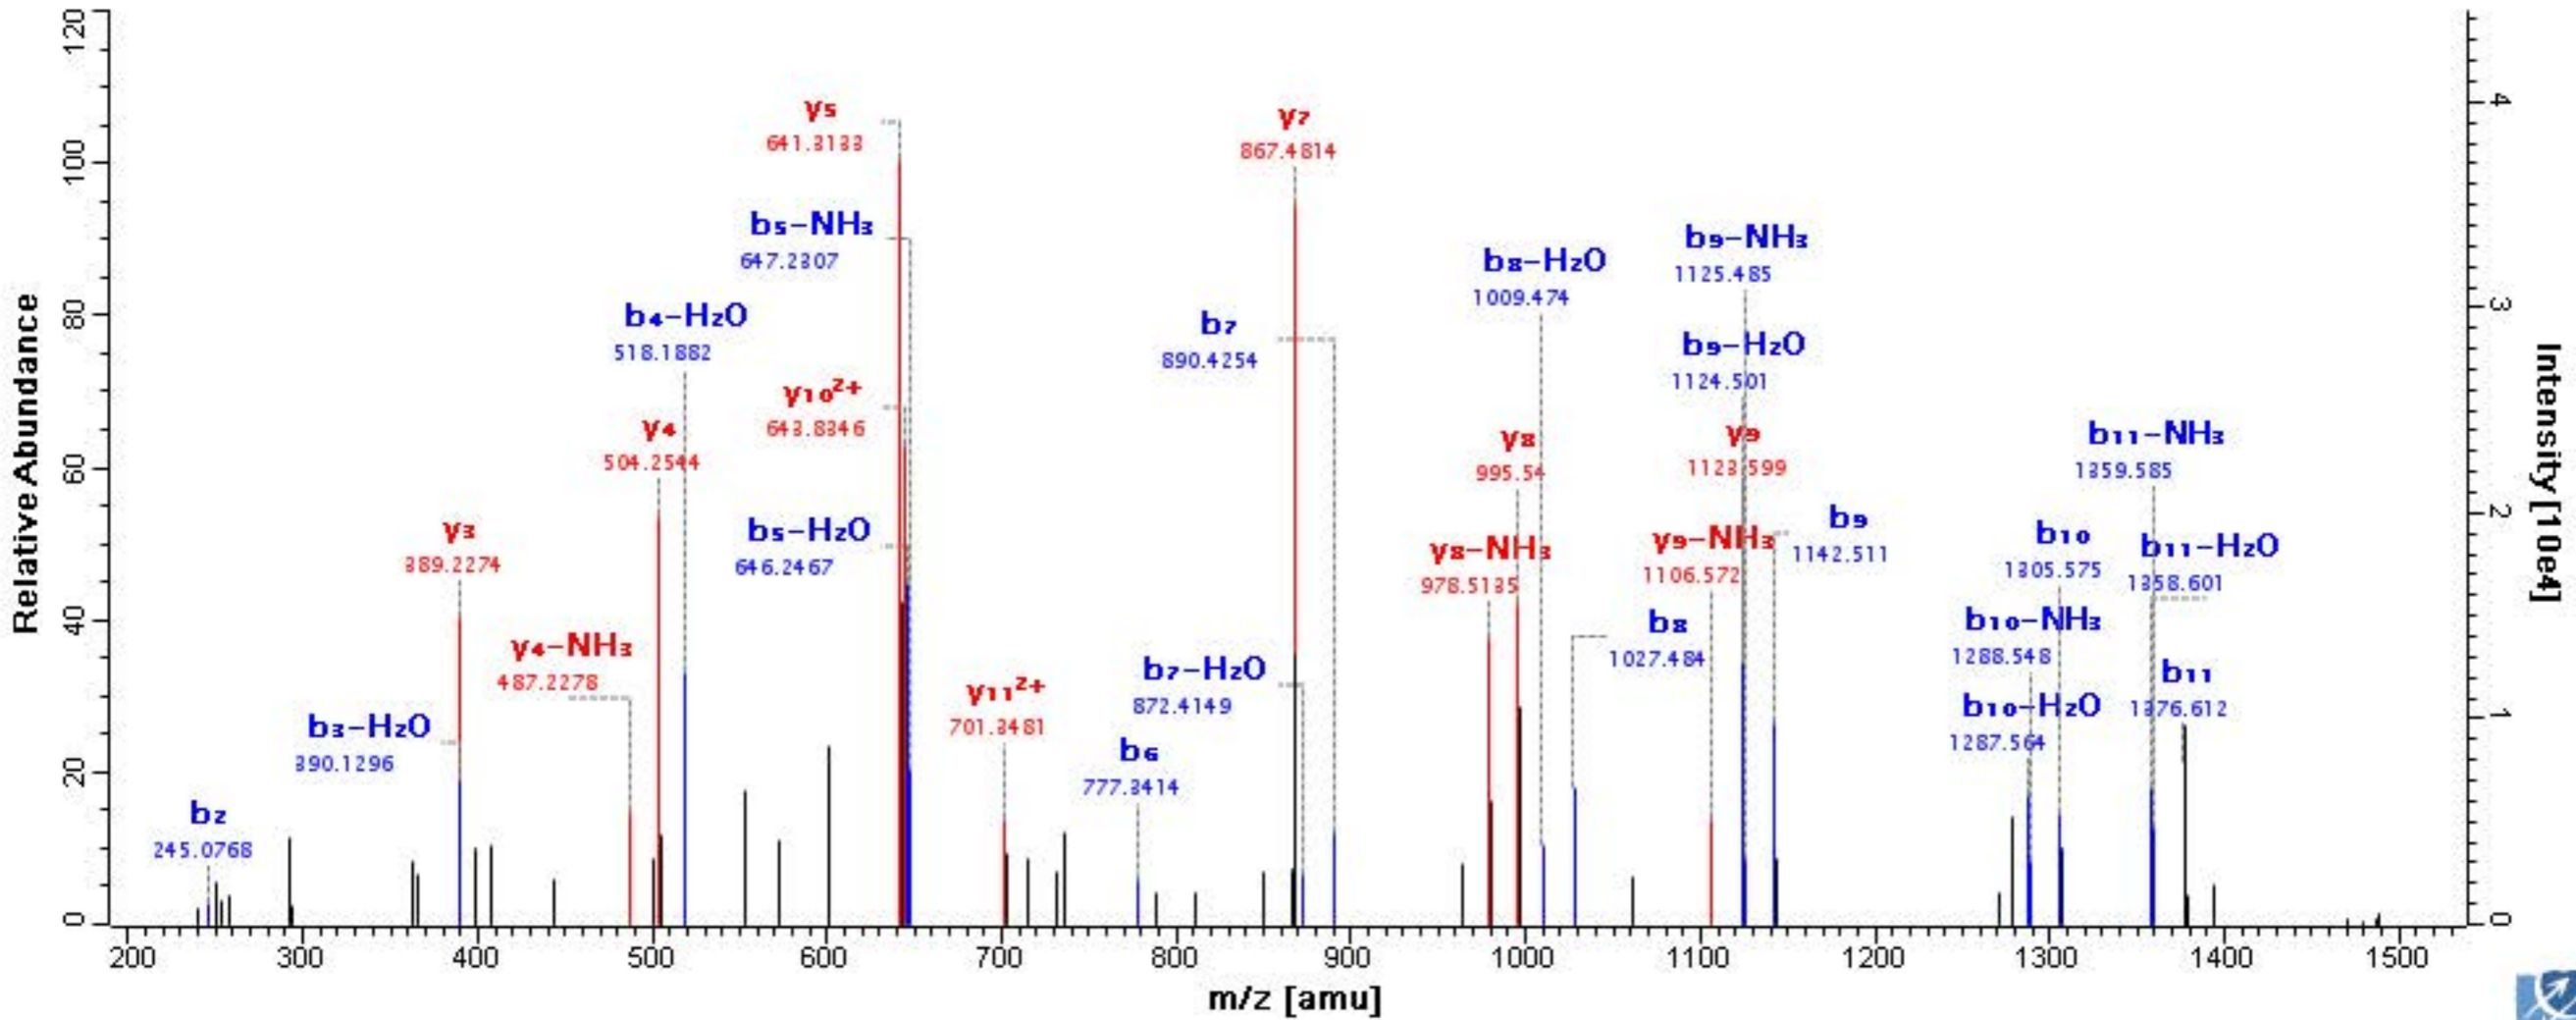

**precursor information**

|                   |                     |
|-------------------|---------------------|
| Mass:             | 1521.70986          |
| m/z:              | System.Collections. |
| Charge:           | System.Collections. |
| Retentiontime:    | System.Collections. |
| Score:            | 174.7679            |
| Mass Error [ppm]: | -0.073898           |
| PEP:              | 7.7726E-26          |
| Precursor Type:   | MULTI               |

**general information**

|                       |           |
|-----------------------|-----------|
| Annotation:           | 10 of 12  |
| AminoAcids Coverage:  | 83 %      |
| Intensity Coverage:   | 67 %      |
| Protein Localisation: | 20 ... 31 |

| b ion      |              |    |     |    | y ion        |            |              | y <sup>2+</sup> ion |  |
|------------|--------------|----|-----|----|--------------|------------|--------------|---------------------|--|
| Δ dalton   | mass         |    | seq |    | Δ dalton     | mass       | Δ dalton     | mass                |  |
|            | 130.04986956 | 1  | E   | 11 |              |            |              |                     |  |
| +0.0216524 | 245.07681259 | 2  | D   | 10 | 1401.6888548 |            | 701.34806561 | +0.1554744          |  |
|            | 408.14014113 | 3  | Y   | 9  | 1286.6619117 |            | 643.8345941  | +0.0936896          |  |
|            | 536.19871864 | 4  | Q   | 8  | 1123.5985832 | +0.0712166 | 1123.5985832 |                     |  |
|            | 664.25729616 | 5  | Q   | 7  | 995.54000568 | +0.0868254 | 995.54000568 |                     |  |
| +0.0756931 | 777.34136014 | 6  | I   | 6  | 867.48142817 | +0.0868091 | 867.48142817 |                     |  |
| +0.0726838 | 890.42542412 | 7  | I   | 5  | 754.39736418 |            | 754.39736418 |                     |  |
| +0.1133203 | 1027.484336  | 8  | H   | 4  | 641.3133002  | +0.0569391 | 641.3133002  |                     |  |
| +0.1413089 | 1142.511279  | 9  | D   | 3  | 504.25438834 | +0.0415101 | 504.25438834 |                     |  |
| +0.1563495 | 1305.5746075 | 10 | Y   | 2  | 389.22744531 | +0.0068076 | 389.22744531 |                     |  |
| +0.2295873 | 1376.6117213 | 11 | A   | 1  | 226.16411677 |            | 226.16411677 |                     |  |
|            |              | 12 | K   | 0  | 155.12700298 |            | 155.12700298 |                     |  |

Source: 20120521\_VR\_Bsu\_TripleSILACrep1\_L2ESLS\_OG\_F02  
 Scannumber: 16532  
 Protein: BSU33230; sigO; yvrl  
 Peptide Score: 147.95  
 Method: ITMS; CID; 3

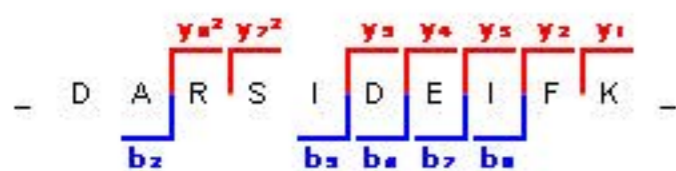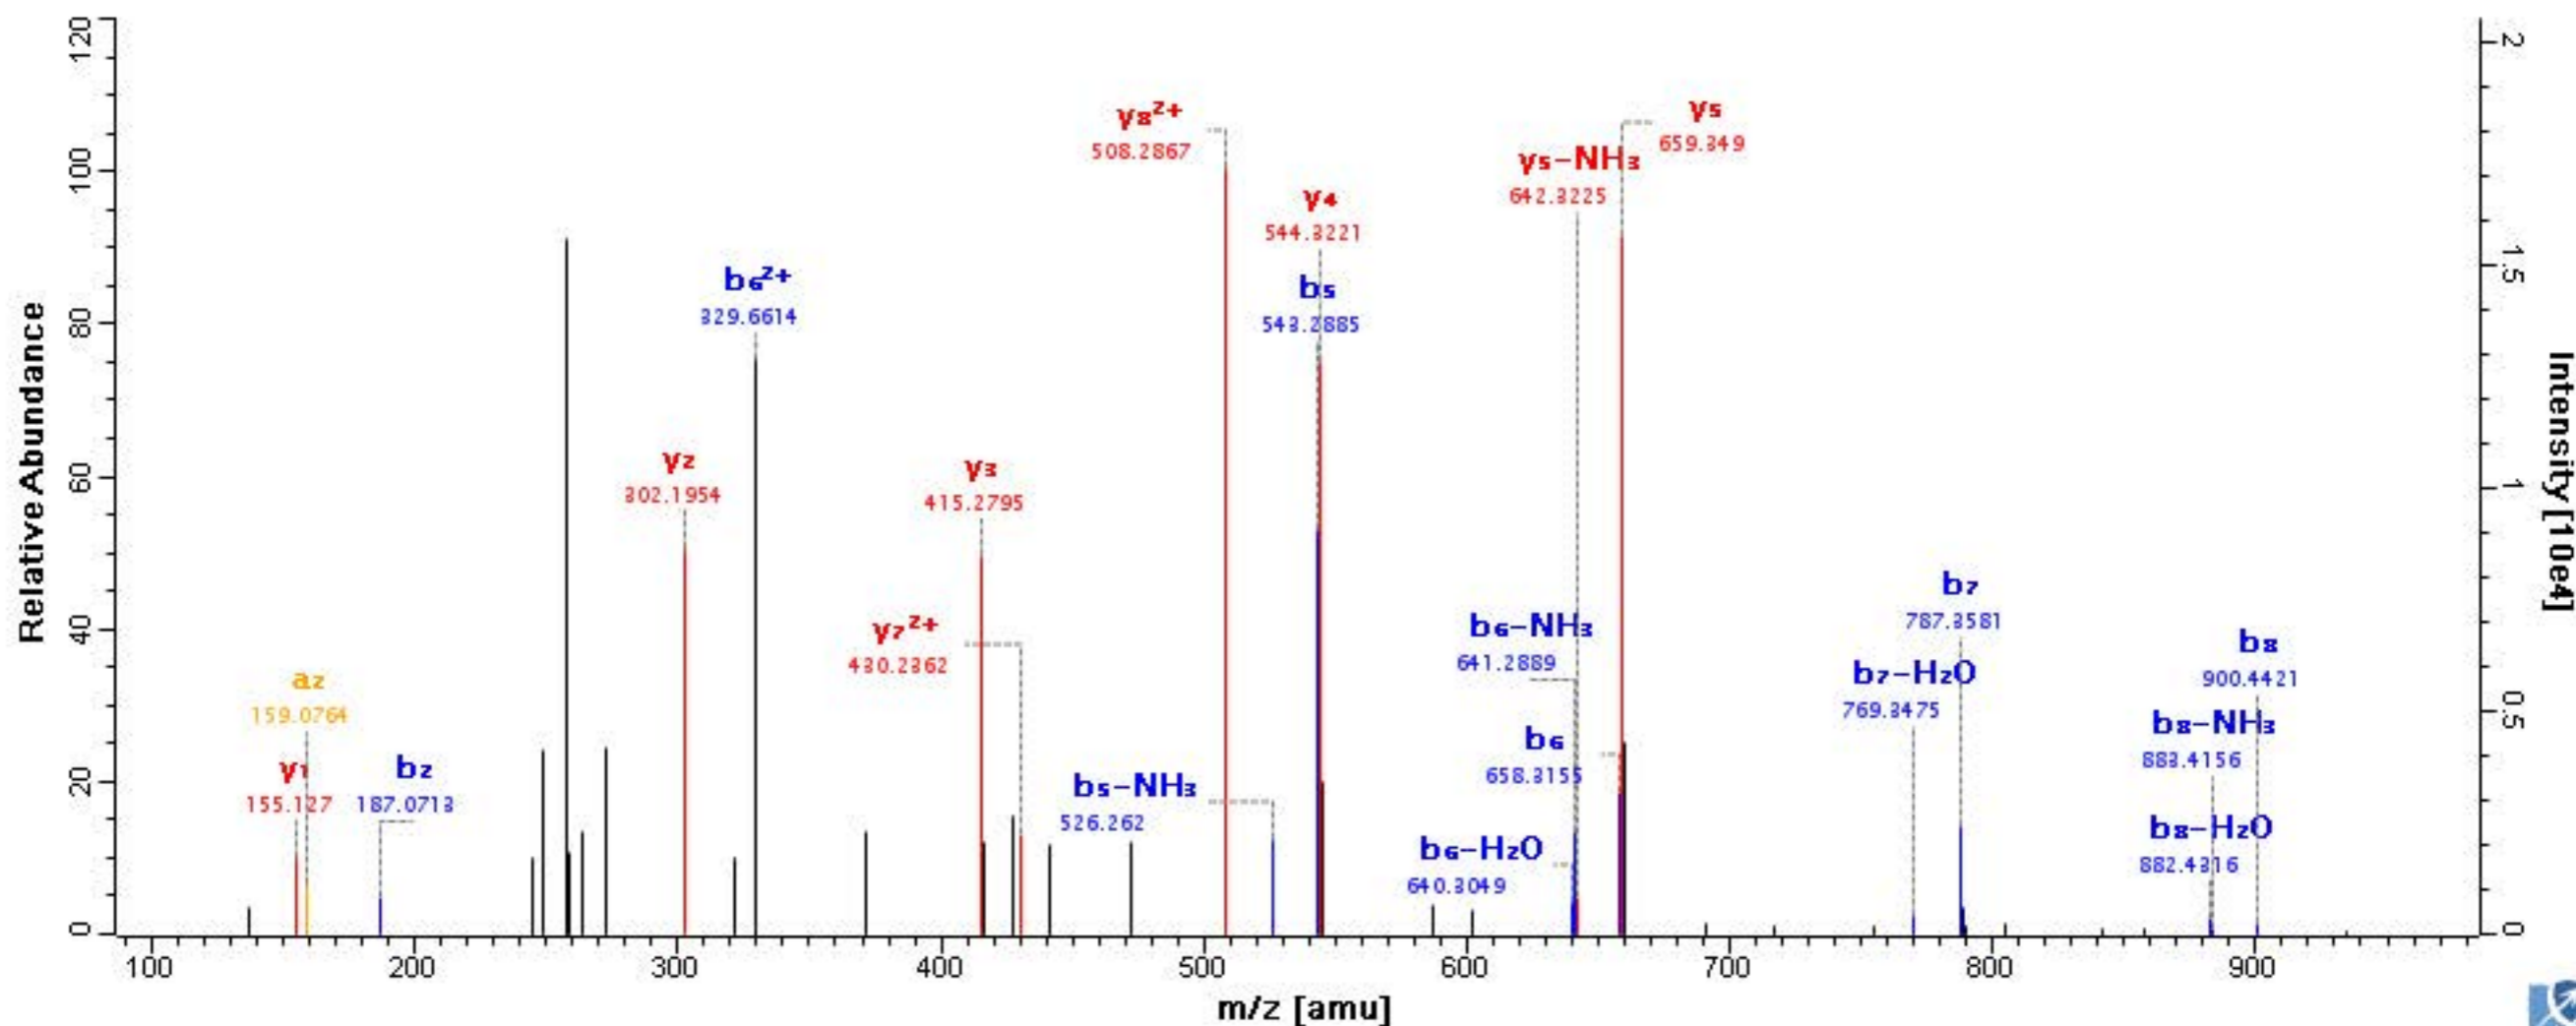

**precursor information**

|                   |                     |
|-------------------|---------------------|
| Mass:             | 1200.62224          |
| m/z:              | System.Collections. |
| Charge:           | System.Collections. |
| Retentiontime:    | System.Collections. |
| Score:            | 147.9469            |
| Mass Error [ppm]: | -0.63702            |
| PEP:              | 0.00047358          |
| Precursor Type:   | ISO                 |

**general information**

|                       |           |
|-----------------------|-----------|
| Annotation:           | 9 of 10   |
| AminoAcids Coverage:  | 90 %      |
| Intensity Coverage:   | 58 %      |
| Protein Localisation: | 30 ... 39 |

| a ion    |         | b <sup>2+</sup> ion |         | b ion    |         |    |     |   | y ion    |          | y <sup>2+</sup> ion |          |
|----------|---------|---------------------|---------|----------|---------|----|-----|---|----------|----------|---------------------|----------|
| Δ dalton | mass    | Δ dalton            | mass    | Δ dalton | mass    |    | seq |   | Δ dalton | mass     | Δ dalton            | mass     |
|          | 88.0393 |                     | 116.034 |          | 116.034 | 1  | D   | 9 |          |          |                     |          |
| +0.05124 | 159.076 |                     | 187.071 | -0.0055  | 187.071 | 2  | A   | 8 | 1086.6   |          | 1086.6              |          |
|          | 315.178 |                     | 343.172 |          | 343.172 | 3  | R   | 7 | 1015.57  |          | 508.287             | +0.1861! |
|          | 402.21  |                     | 430.204 |          | 430.204 | 4  | S   | 6 | 859.465  |          | 430.236             | +0.0175! |
|          | 515.294 |                     | 543.289 | +0.0975  | 543.289 | 5  | I   | 5 | 772.433  |          | 772.433             |          |
|          | 630.321 | -0.2937             | 329.661 | +0.0966  | 658.315 | 6  | D   | 4 | 659.349  | +0.0684  | 659.349             |          |
|          | 759.363 |                     | 787.358 | +0.0102  | 787.358 | 7  | E   | 3 | 544.322  | +0.03632 | 544.322             |          |
|          | 872.447 |                     | 900.442 | +0.2231  | 900.442 | 8  | I   | 2 | 415.279  | -0.0149  | 415.279             |          |
|          | 1019.52 |                     | 1047.51 |          | 1047.51 | 9  | F   | 1 | 302.195  | -0.0235  | 302.195             |          |
|          |         |                     |         |          |         | 10 | K   | 0 | 155.127  | -0.1019  | 155.127             |          |



Source: 20120521\_VR\_Bsu\_TripleSILACrep1\_L2ESLS\_OG\_F02  
 Scannumber: 19312  
 Protein: BSU40290; yycN  
 Peptide Score: 107.09  
 Method: ITMS; CID; 3

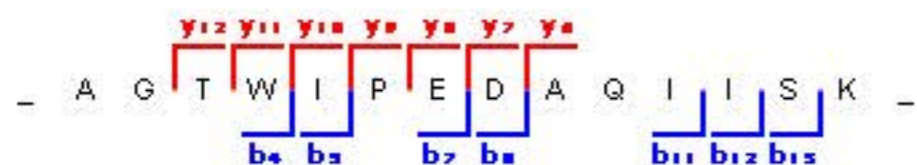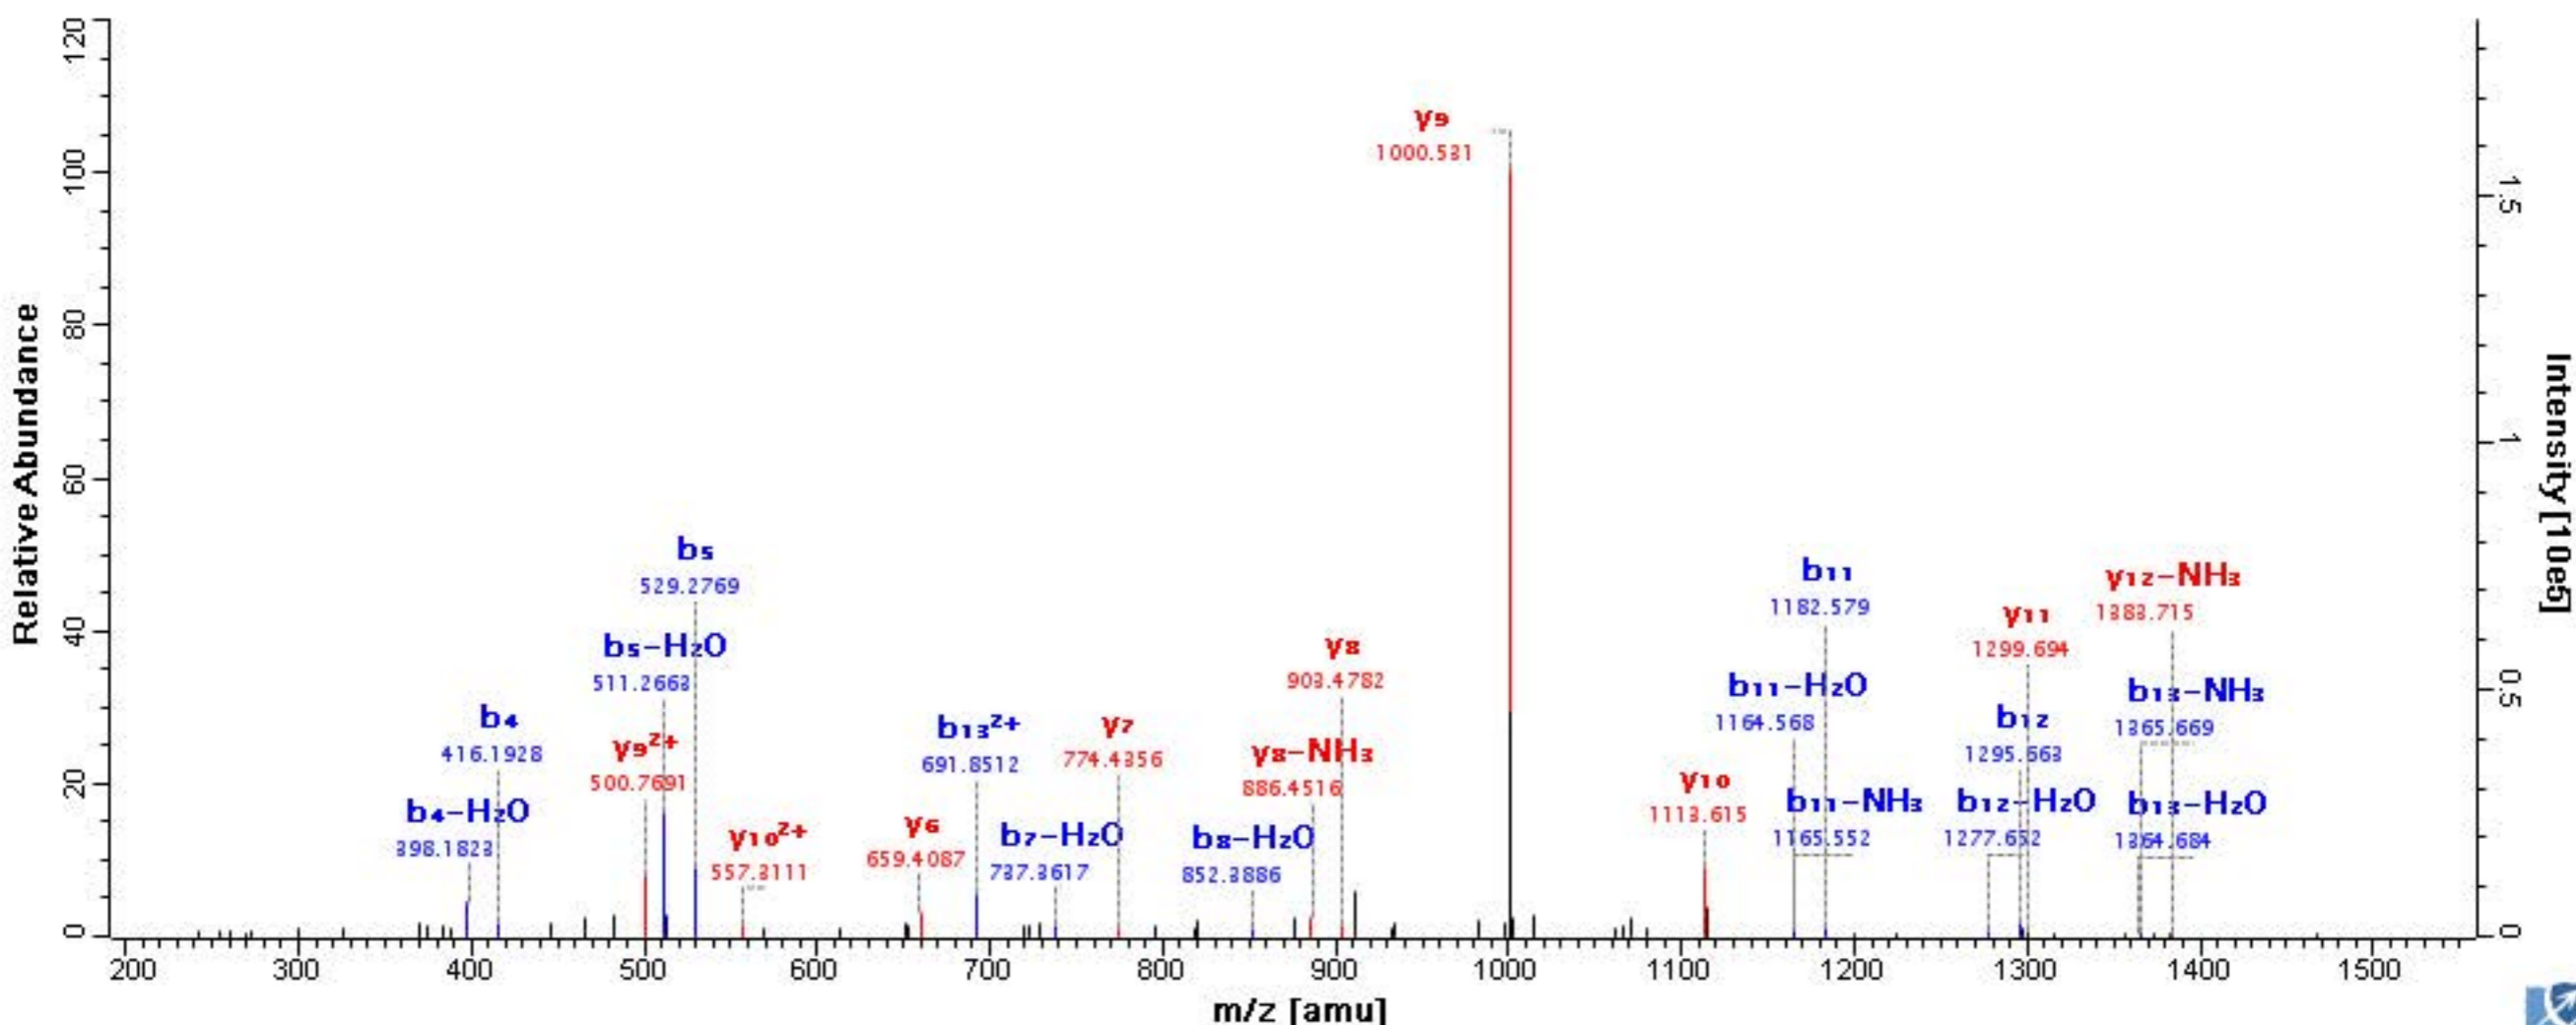

#### precursor information

|                   |                     |
|-------------------|---------------------|
| Mass:             | 1527.79843          |
| m/z:              | System.Collections. |
| Charge:           | System.Collections. |
| Retentiontime:    | System.Collections. |
| Score:            | 107.0884            |
| Mass Error [ppm]: | 3.3514              |
| PEP:              | 0.00032931          |
| Precursor Type:   | MULTI               |

#### general information

|                       |           |
|-----------------------|-----------|
| Annotation:           | 10 of 14  |
| AminoAcids Coverage:  | 71 %      |
| Intensity Coverage:   | 63 %      |
| Protein Localisation: | 31 ... 44 |

| b <sup>2+</sup> ion |          | b ion     |          | seq |   |    | γ ion    |           | γ <sup>2+</sup> ion |           |
|---------------------|----------|-----------|----------|-----|---|----|----------|-----------|---------------------|-----------|
| Δ dalton            | mass     | Δ dalton  | mass     |     |   |    | Δ dalton | mass      | Δ dalton            | mass      |
|                     | 72.04439 |           | 72.04439 | 1   | A | 13 |          |           |                     |           |
|                     | 129.0659 |           | 129.0659 | 2   | G | 12 | 1457.763 |           | 1457.763            |           |
|                     | 230.1135 |           | 230.1135 | 3   | T | 11 | 1400.742 |           | 1400.742            |           |
|                     | 416.1928 | -0.123632 | 416.1928 | 4   | W | 10 | 1299.694 | +0.167732 | 1299.694            |           |
|                     | 529.2769 | +0.014045 | 529.2769 | 5   | I | 9  | 1113.615 | +0.083471 | 557.3111            | +0.076915 |
|                     | 626.3297 |           | 626.3297 | 6   | P | 8  | 1000.531 | +0.067437 | 500.7691            | +0.4652   |
|                     | 755.3723 |           | 755.3723 | 7   | E | 7  | 903.4782 | +0.184471 | 903.4782            |           |
|                     | 870.3992 |           | 870.3992 | 8   | D | 6  | 774.4356 | +0.164198 | 774.4356            |           |
|                     | 941.4363 |           | 941.4363 | 9   | A | 5  | 659.4087 | +0.208475 | 659.4087            |           |
|                     | 1069.495 |           | 1069.495 | 10  | Q | 4  | 588.3715 |           | 588.3715            |           |
|                     | 1182.579 | +0.309951 | 1182.579 | 11  | I | 3  | 460.313  |           | 460.313             |           |
|                     | 1295.663 | +0.241512 | 1295.663 | 12  | I | 2  | 347.2289 |           | 347.2289            |           |
| +0.100799           | 691.8512 |           | 1382.695 | 13  | S | 1  | 234.1448 |           | 234.1448            |           |
|                     |          |           |          | 14  | K | 0  | 147.1128 |           | 147.1128            |           |

Source: 20120521\_VR\_Bsu\_TripleSILACrep1\_L2ESLS\_OG\_FD2  
 Scannumber: 19356  
 Protein: BSU08370; yfiR  
 Peptide Score: 179.81  
 Method: ITMS; CID; 3

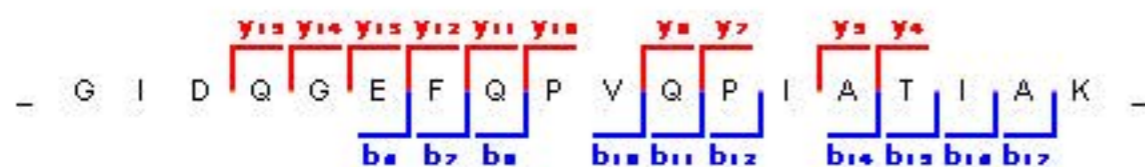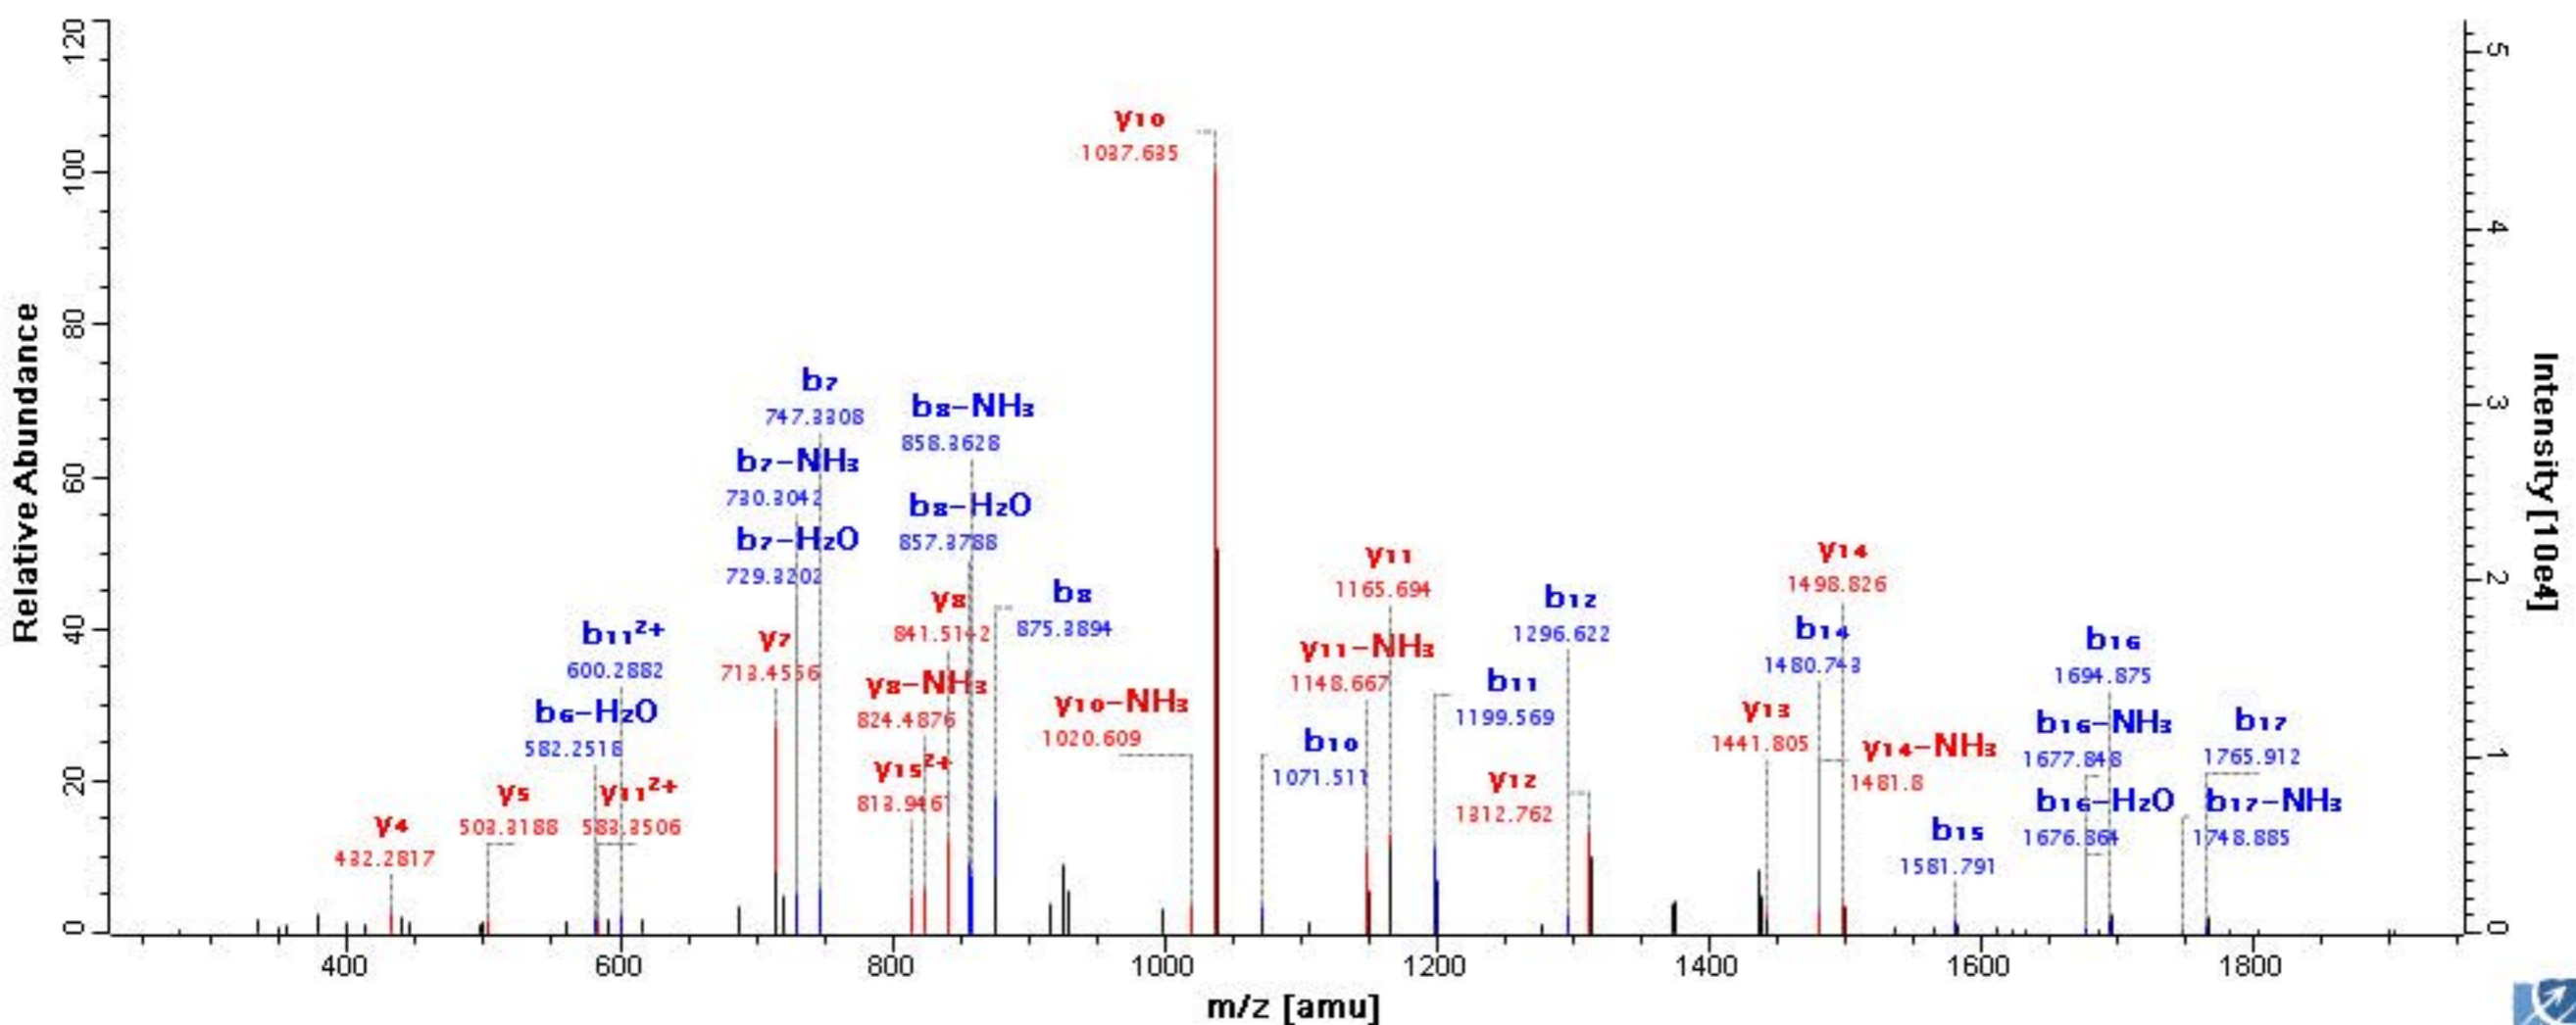

#### precursor information

|                   |                     |
|-------------------|---------------------|
| Mass:             | 1911.00905          |
| m/z:              | System.Collections. |
| Charge:           | System.Collections. |
| Retentiontime:    | System.Collections. |
| Score:            | 179.8072            |
| Mass Error [ppm]: | -0.58912            |
| PEP:              | 8.5891E-35          |
| Precursor Type:   | MULTI               |

#### general information

|                       |             |
|-----------------------|-------------|
| Annotation:           | 13 of 18    |
| AminoAcids Coverage:  | 72 %        |
| Intensity Coverage:   | 58 %        |
| Protein Localisation: | 145 ... 162 |

| b <sup>2+</sup> ion |          | b ion     |          | seq |   |    | y ion    |           | y <sup>2+</sup> ion |           |
|---------------------|----------|-----------|----------|-----|---|----|----------|-----------|---------------------|-----------|
| Δ dalton            | mass     | Δ dalton  | mass     |     |   |    | Δ dalton | mass      | Δ dalton            | mass      |
|                     | 58.02874 |           | 58.02874 | 1   | G | 17 |          |           |                     |           |
|                     | 171.1128 |           | 171.1128 | 2   | I | 16 | 1854.996 |           | 1854.996            |           |
|                     | 286.1397 |           | 286.1397 | 3   | D | 15 | 1741.912 |           | 1741.912            |           |
|                     | 414.1983 |           | 414.1983 | 4   | Q | 14 | 1626.885 |           | 813.9461            | +0.006385 |
|                     | 471.2198 |           | 471.2198 | 5   | G | 13 | 1498.826 | +0.216807 | 1498.826            |           |
|                     | 600.2624 |           | 600.2624 | 6   | E | 12 | 1441.805 | +0.129751 | 1441.805            |           |
|                     | 747.3308 | +0.014908 | 747.3308 | 7   | F | 11 | 1312.762 | +0.190654 | 1312.762            |           |
|                     | 875.3894 | +0.022309 | 875.3894 | 8   | Q | 10 | 1165.694 | +0.216343 | 583.3506            | +0.019389 |
|                     | 972.4421 |           | 972.4421 | 9   | P | 9  | 1037.635 | +0.066303 | 1037.635            |           |
|                     | 1071.511 | -0.021293 | 1071.511 | 10  | V | 8  | 940.5826 |           | 940.5826            |           |
| +0.020636           | 600.2882 | +0.021082 | 1199.569 | 11  | Q | 7  | 841.5142 | -0.007405 | 841.5142            |           |
|                     | 1296.622 | +0.369075 | 1296.622 | 12  | P | 6  | 713.4556 | +0.159876 | 713.4556            |           |
|                     | 1409.706 |           | 1409.706 | 13  | I | 5  | 616.4028 |           | 616.4028            |           |
|                     | 1480.743 | +0.229342 | 1480.743 | 14  | A | 4  | 503.3188 | -0.018908 | 503.3188            |           |
|                     | 1581.791 | +0.085228 | 1581.791 | 15  | T | 3  | 432.2817 | -0.130415 | 432.2817            |           |
|                     | 1694.875 | +0.022649 | 1694.875 | 16  | I | 2  | 331.234  |           | 331.234             |           |
|                     | 1765.912 | -0.111755 | 1765.912 | 17  | A | 1  | 218.1499 |           | 218.1499            |           |
|                     |          |           |          | 18  | K | 0  | 147.1128 |           | 147.1128            |           |

Source: 20120521\_VR\_Bsu\_TripleSILACrep1\_L2ESLS\_OG\_F02  
 Scannumber: 20423  
 Protein: BSU05080; yddR  
 Peptide Score: 95.1  
 Method: ITMS; CID; 3

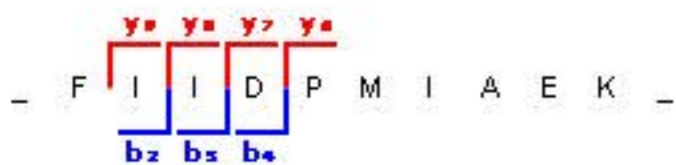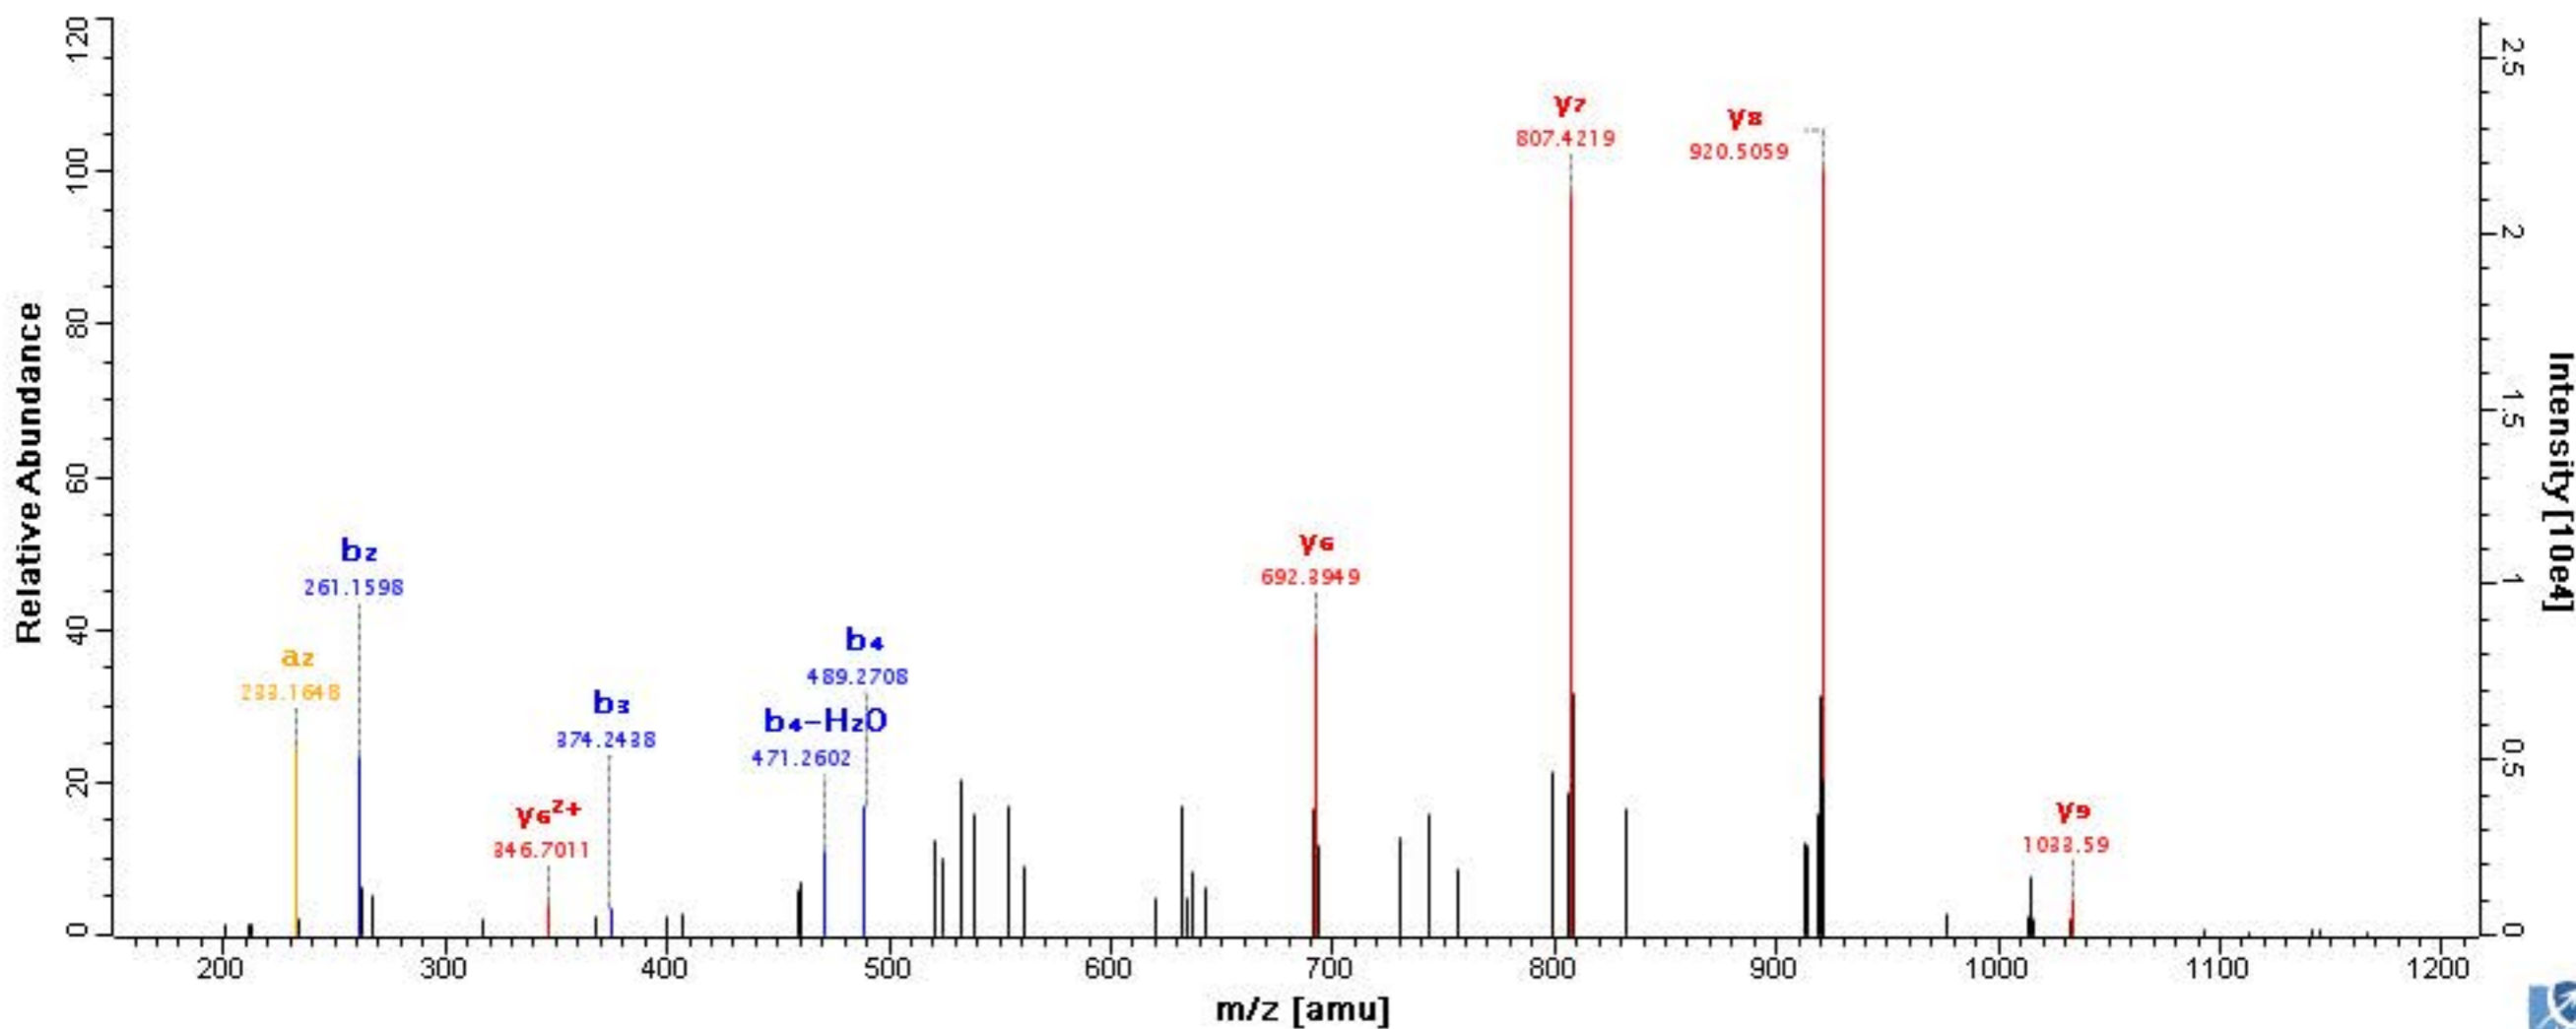

#### precursor information

|                   |                     |
|-------------------|---------------------|
| Mass:             | 1175.62675          |
| m/z:              | System.Collections. |
| Charge:           | System.Collections. |
| Retentiontime:    | System.Collections. |
| Score:            | 95.09868            |
| Mass Error [ppm]: | 0.6085              |
| PEP:              | 0.0023702           |
| Precursor Type:   | MULTI               |

#### general information

|                       |           |
|-----------------------|-----------|
| Annotation:           | 4 of 10   |
| AminoAcids Coverage:  | 40 %      |
| Intensity Coverage:   | 42 %      |
| Protein Localisation: | 20 ... 29 |

| a ion     |          | b ion     |          |    |     |   | y ion    |           | y <sup>2+</sup> ion |           |
|-----------|----------|-----------|----------|----|-----|---|----------|-----------|---------------------|-----------|
| Δ dalton  | mass     | Δ dalton  | mass     |    | seq |   | Δ dalton | mass      | Δ dalton            | mass      |
|           | 120.0808 |           | 148.0757 | 1  | F   | 9 |          |           |                     |           |
| -0.055953 | 233.1648 | -0.041773 | 261.1598 | 2  | I   | 8 | 1033.59  | +0.279872 | 1033.59             |           |
|           | 346.2489 | +0.236498 | 374.2438 | 3  | I   | 7 | 920.5059 | +0.106367 | 920.5059            |           |
|           | 461.2758 | -0.017832 | 489.2708 | 4  | D   | 6 | 807.4219 | +0.067567 | 807.4219            |           |
|           | 558.3286 |           | 586.3235 | 5  | P   | 5 | 692.3949 | +0.042753 | 346.7011            | +0.029915 |
|           | 689.3691 |           | 717.364  | 6  | M   | 4 | 595.3422 |           | 595.3422            |           |
|           | 802.4532 |           | 830.4481 | 7  | I   | 3 | 464.3017 |           | 464.3017            |           |
|           | 873.4903 |           | 901.4852 | 8  | A   | 2 | 351.2176 |           | 351.2176            |           |
|           | 1002.533 |           | 1030.528 | 9  | E   | 1 | 280.1805 |           | 280.1805            |           |
|           |          |           |          | 10 | K   | 0 | 151.1379 |           | 151.1379            |           |

Source: 20120521\_VR\_Bsu\_TripleSILACrep1\_L2ESLS\_OG\_F02  
 Scannumber: 21939  
 Protein: BSU17160; pksH  
 Peptide Score: 140.91  
 Method: ITMS; CID; 3

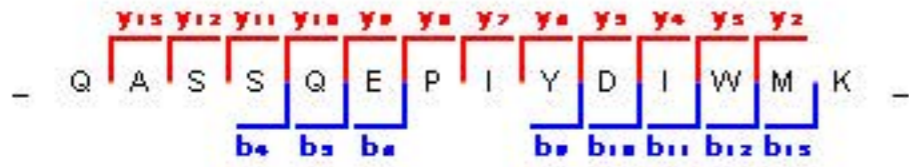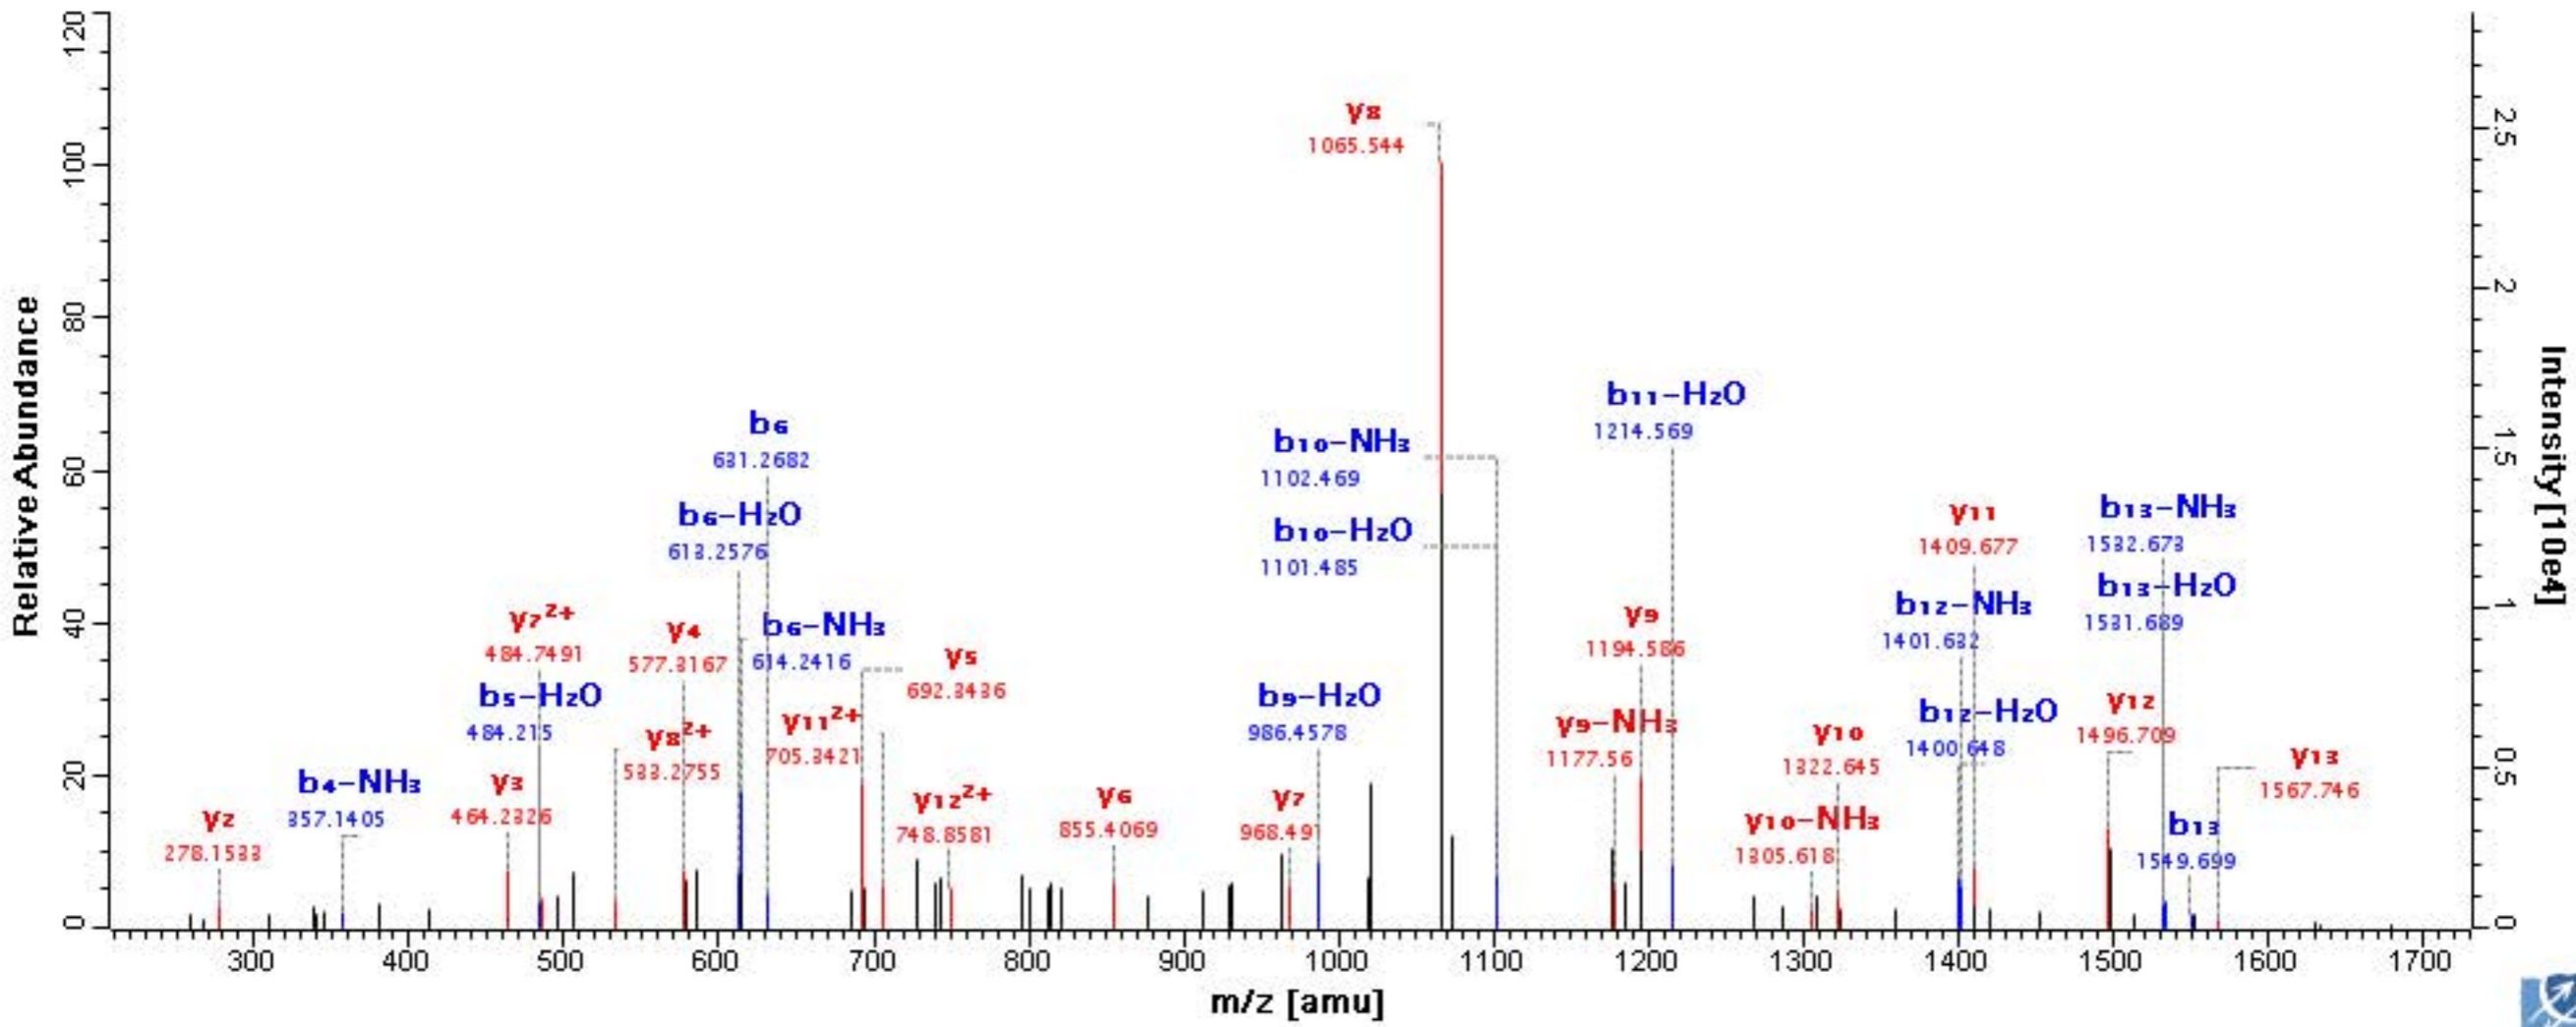

#### precursor information

|                   |                     |
|-------------------|---------------------|
| Mass:             | 1694.79662          |
| m/z:              | System.Collections. |
| Charge:           | System.Collections. |
| Retentiontime:    | System.Collections. |
| Score:            | 140.9054            |
| Mass Error [ppm]: | -0.46545            |
| PEP:              | 0.00071549          |
| Precursor Type:   | ISO                 |

#### general information

|                       |           |
|-----------------------|-----------|
| Annotation:           | 12 of 14  |
| AminoAcids Coverage:  | 86 %      |
| Intensity Coverage:   | 50 %      |
| Protein Localisation: | 82 ... 95 |

| b ion      |              |    |     |    | y ion        |            | y <sup>2+</sup> ion |            |
|------------|--------------|----|-----|----|--------------|------------|---------------------|------------|
| Δ dalton   | mass         |    | seq |    | Δ dalton     | mass       | Δ dalton            | mass       |
|            | 129.06585398 | 1  | Q   | 13 |              |            |                     |            |
|            | 200.10296777 | 2  | A   | 12 | 1567.7461063 | +0.2515743 | 1567.7461063        |            |
|            | 287.13499618 | 3  | S   | 11 | 1496.7089925 | +0.0977702 | 748.8581345         | +0.2506301 |
|            | 374.16702459 | 4  | S   | 10 | 1409.6769641 | +0.0676648 | 705.3421203         | +0.1446351 |
|            | 502.2256021  | 5  | Q   | 9  | 1322.6449357 | +0.1368026 | 1322.6449357        |            |
| +0.0678033 | 631.26819519 | 6  | E   | 8  | 1194.5863582 | +0.0927189 | 1194.5863582        |            |
|            | 728.32095905 | 7  | P   | 7  | 1065.5437651 | +0.0518159 | 533.27552079        | +0.3358073 |
|            | 841.40502303 | 8  | I   | 6  | 968.49100126 | +0.1290549 | 484.74913886        | +0.4551458 |
|            | 1004.4683516 | 9  | Y   | 5  | 855.40693728 | +4.51E-05  | 855.40693728        |            |
|            | 1119.4952946 | 10 | D   | 4  | 692.34360874 | +0.0484201 | 692.34360874        |            |
|            | 1232.5793586 | 11 | I   | 3  | 577.31666571 | +0.0045623 | 577.31666571        |            |
|            | 1418.6586715 | 12 | W   | 2  | 464.23260173 | -0.0686613 | 464.23260173        |            |
| +0.0744034 | 1549.6991561 | 13 | M   | 1  | 278.15328878 | +0.1593028 | 278.15328878        |            |
|            |              | 14 | K   | 0  | 147.11280417 |            | 147.11280417        |            |

Source: 20120521\_VR\_Bsu\_TripleSILACrep1\_L2ESLS\_OG\_F02  
 Scannumber: 25445  
 Protein: BSU23760; coaA; yqj5  
 Peptide Score: 169.41  
 Method: ITMS; CID; 3

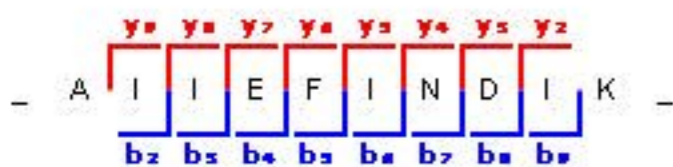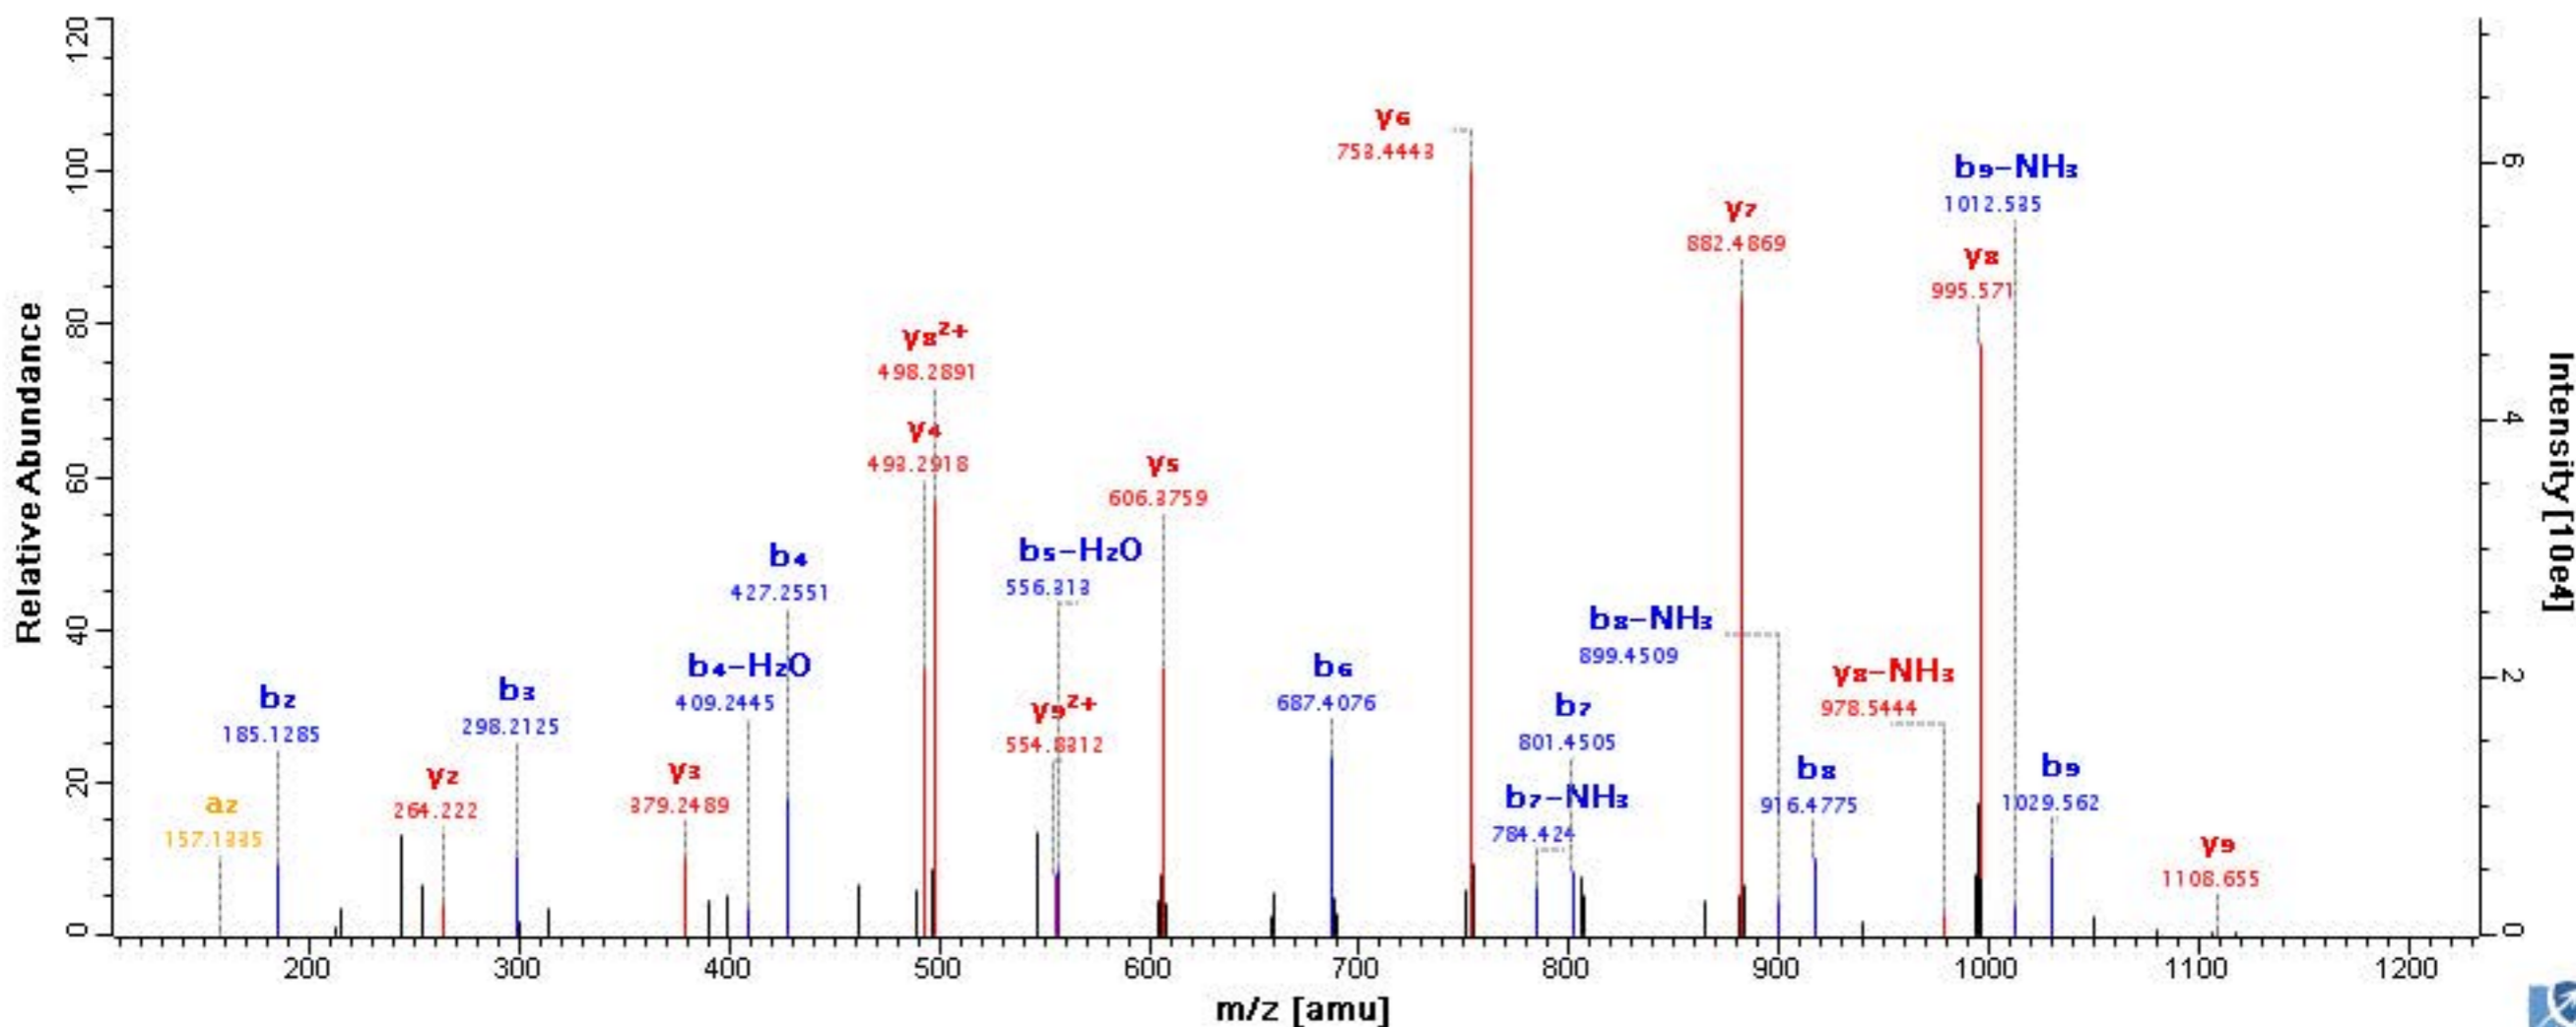

**precursor information**

|                   |                     |
|-------------------|---------------------|
| Mass:             | 1174.65994          |
| m/z:              | System.Collections. |
| Charge:           | System.Collections. |
| Retentiontime:    | System.Collections. |
| Score:            | 169.4059            |
| Mass Error [ppm]: | 0.13894             |
| PEP:              | 2.6786E-16          |
| Precursor Type:   | MULTI               |

**general information**

|                       |             |
|-----------------------|-------------|
| Annotation:           | 8 of 10     |
| AminoAcids Coverage:  | 80 %        |
| Intensity Coverage:   | 69 %        |
| Protein Localisation: | 156 ... 165 |

| a ion     |          | b ion     |          |     | y ion |          | y <sup>2+</sup> ion |           |          |           |
|-----------|----------|-----------|----------|-----|-------|----------|---------------------|-----------|----------|-----------|
| Δ dalton  | mass     | Δ dalton  | mass     | seq |       | Δ dalton | mass                | Δ dalton  | mass     |           |
|           | 44.04948 |           | 72.04439 | 1   | A     |          |                     |           |          |           |
| -0.000422 | 157.1335 | +0.092844 | 185.1285 | 2   | I     | 8        | 1108.655            | +0.377548 | 554.8312 | +0.178361 |
|           | 270.2176 | +0.010474 | 298.2125 | 3   | I     | 7        | 995.571             | +0.146732 | 498.2891 | -0.017522 |
|           | 399.2602 | +0.246415 | 427.2551 | 4   | E     | 6        | 882.4869            | +0.095481 | 882.4869 |           |
|           | 546.3286 |           | 574.3235 | 5   | F     | 5        | 753.4443            | +0.112317 | 753.4443 |           |
|           | 659.4127 | +0.09943  | 687.4076 | 6   | I     | 4        | 606.3759            | +0.104681 | 606.3759 |           |
|           | 773.4556 | +0.254134 | 801.4505 | 7   | N     | 3        | 493.2918            | +0.065088 | 493.2918 |           |
|           | 888.4825 | +0.300372 | 916.4775 | 8   | D     | 2        | 379.2489            | +0.024977 | 379.2489 |           |
|           | 1001.567 | +0.304565 | 1029.562 | 9   | I     | 1        | 264.222             | -0.043417 | 264.222  |           |
|           |          |           |          | 10  | K     | 0        | 151.1379            |           | 151.1379 |           |

Source: 20120521\_VR\_Bsu\_TripleSILACrep1\_L2ESLS\_OG\_F03  
 Scannumber: 15273  
 Protein: BSU07440; yfmK  
 Peptide Score: 77.53  
 Method: ITMS; CID; 3

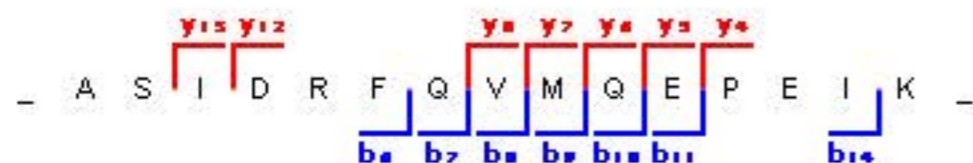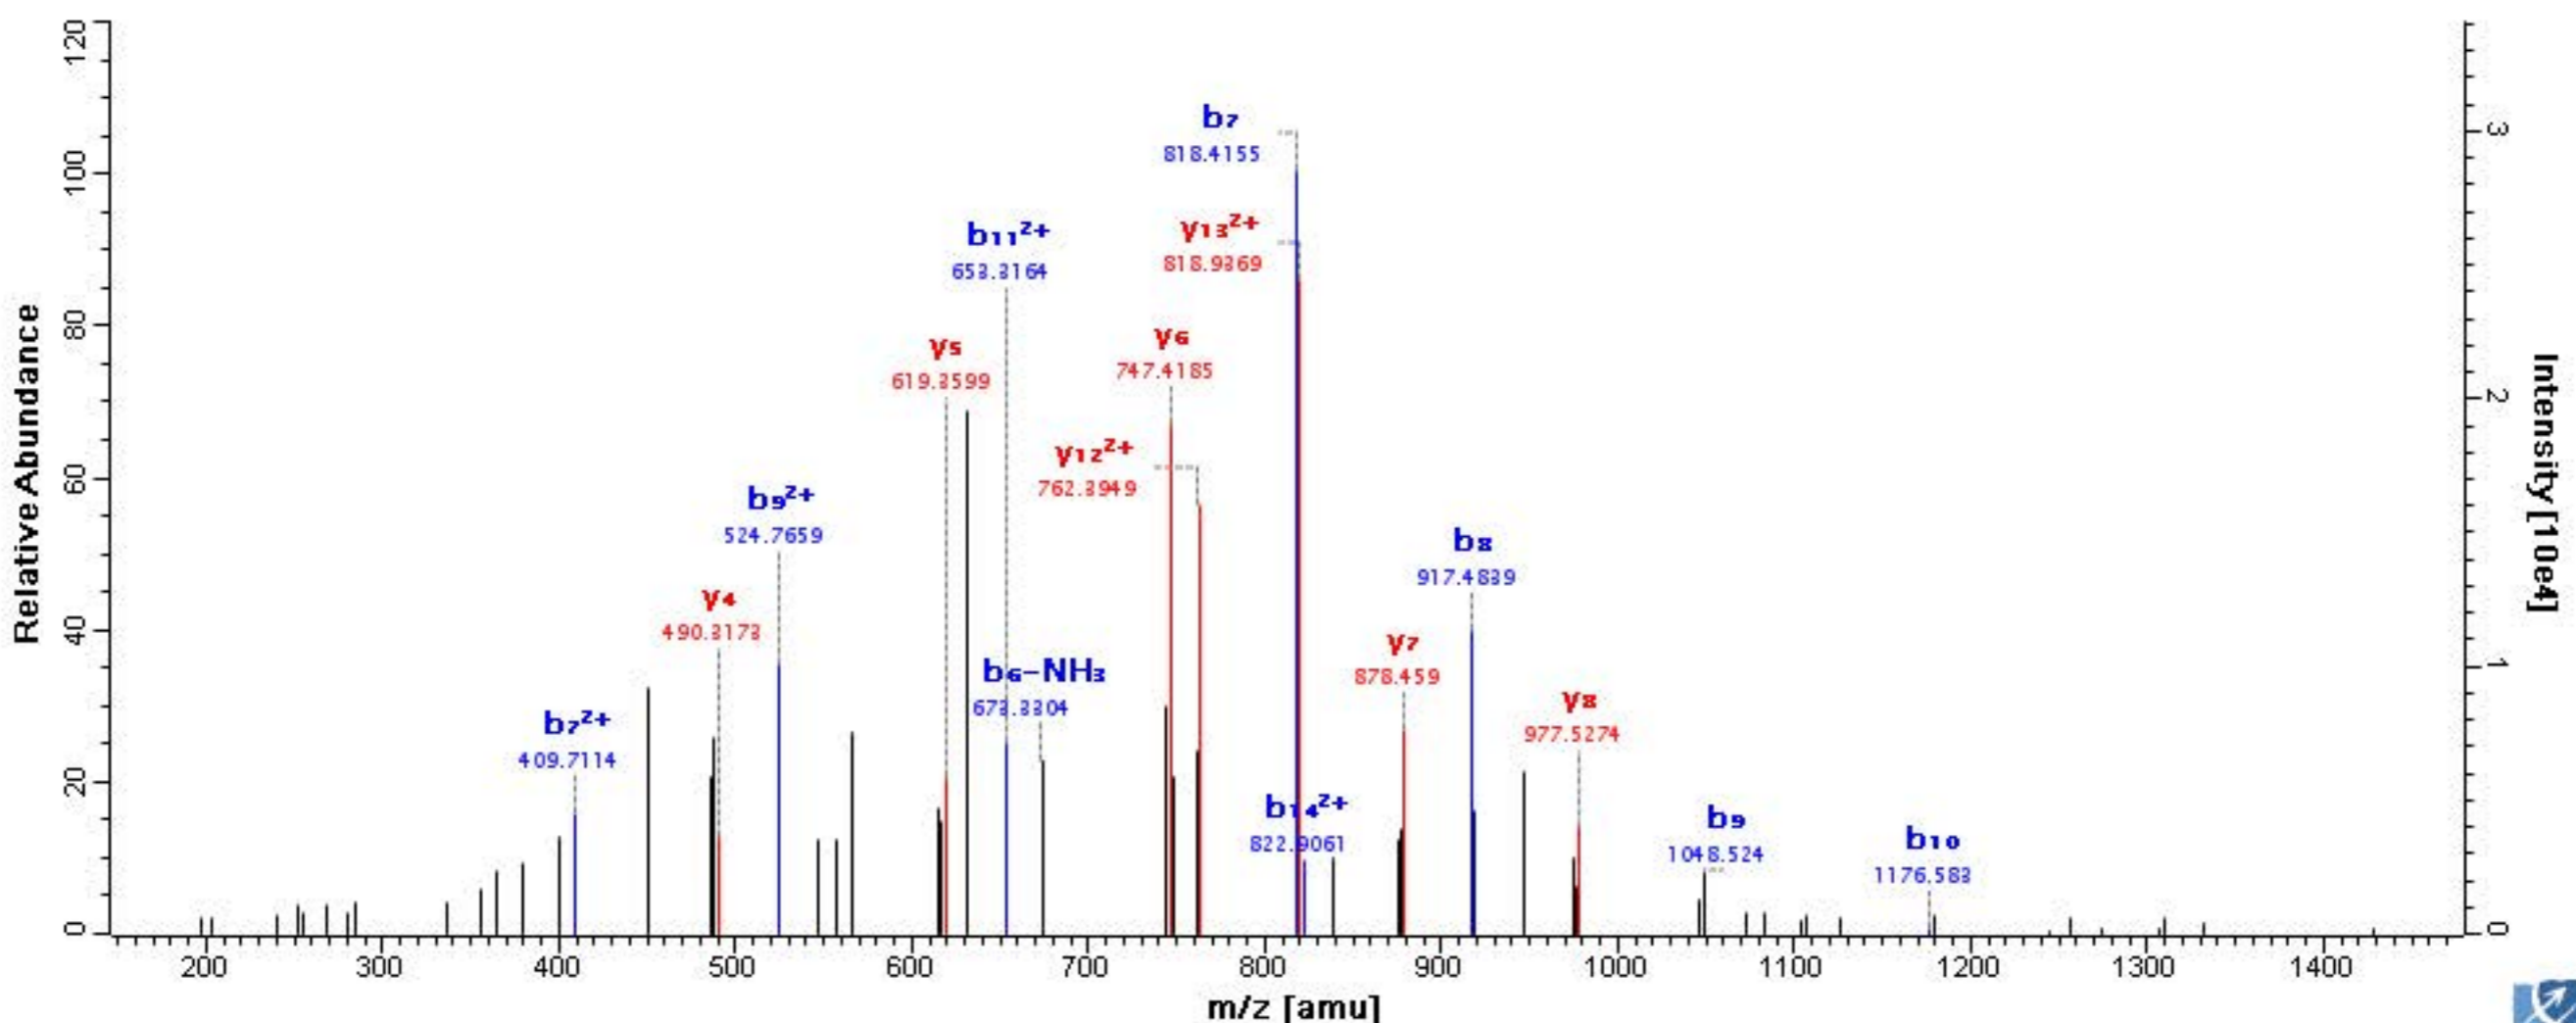

#### precursor information

|                   |                     |
|-------------------|---------------------|
| Mass:             | 1789.90316          |
| m/z:              | System.Collections. |
| Charge:           | System.Collections. |
| Retentiontime:    | System.Collections. |
| Score:            | 77.52677            |
| Mass Error [ppm]: | -0.062429           |
| PEP:              | 0.00069607          |
| Precursor Type:   | MULTI               |

| b <sup>2+</sup> ion |          | b ion     |          |     | y ion |          | y <sup>2+</sup> ion |           |                    |
|---------------------|----------|-----------|----------|-----|-------|----------|---------------------|-----------|--------------------|
| Δ dalton            | mass     | Δ dalton  | mass     | seq |       | Δ dalton | mass                | Δ dalton  | mass               |
|                     | 72.04439 |           | 72.04439 | 1   | A     | 14       |                     |           |                    |
|                     | 159.0764 |           | 159.0764 | 2   | S     | 13       | 1723.899            |           | 1723.899           |
|                     | 272.1605 |           | 272.1605 | 3   | I     | 12       | 1636.867            |           | 818.9369 +0.477718 |
|                     | 387.1874 |           | 387.1874 | 4   | D     | 11       | 1523.782            |           | 762.3949 +0.295751 |
|                     | 543.2885 |           | 543.2885 | 5   | R     | 10       | 1408.756            |           | 1408.756           |
|                     | 690.357  |           | 690.357  | 6   | F     | 9        | 1252.654            |           | 1252.654           |
| -0.047218           | 409.7114 | -0.35608  | 818.4155 | 7   | Q     | 8        | 1105.586            |           | 1105.586           |
|                     | 917.4839 | +0.04212  | 917.4839 | 8   | V     | 7        | 977.5274            | +0.138492 | 977.5274           |
| +0.13521            | 524.7659 | +0.055407 | 1048.524 | 9   | M     | 6        | 878.459             | +0.015012 | 878.459            |
|                     | 1176.583 | +0.379276 | 1176.583 | 10  | Q     | 5        | 747.4185            | -0.012131 | 747.4185           |
| +0.386627           | 653.3164 |           | 1305.626 | 11  | E     | 4        | 619.3599            | +0.282836 | 619.3599           |
|                     | 1402.678 |           | 1402.678 | 12  | P     | 3        | 490.3173            | +0.138784 | 490.3173           |
|                     | 1531.721 |           | 1531.721 | 13  | E     | 2        | 393.2646            |           | 393.2646           |
| -0.003559           | 822.9061 |           | 1644.805 | 14  | I     | 1        | 264.222             |           | 264.222            |
|                     |          |           |          | 15  | K     | 0        | 151.1379            |           | 151.1379           |

#### general information

|                       |          |
|-----------------------|----------|
| Annotation:           | 11 of 15 |
| AminoAcids Coverag    | 73 %     |
| Intensity Coverage:   | 49 %     |
| Protein Localisation: | 2 ... 16 |

Source: 20120521\_VR\_Bsu\_TripleSILACrep1\_L2ESLS\_OG\_F04  
 Scannumber: 12016  
 Protein: BSU33410; yvgO  
 Peptide Score: 210.64  
 Method: ITMS; CID; 3

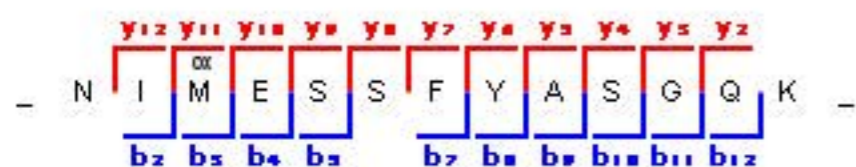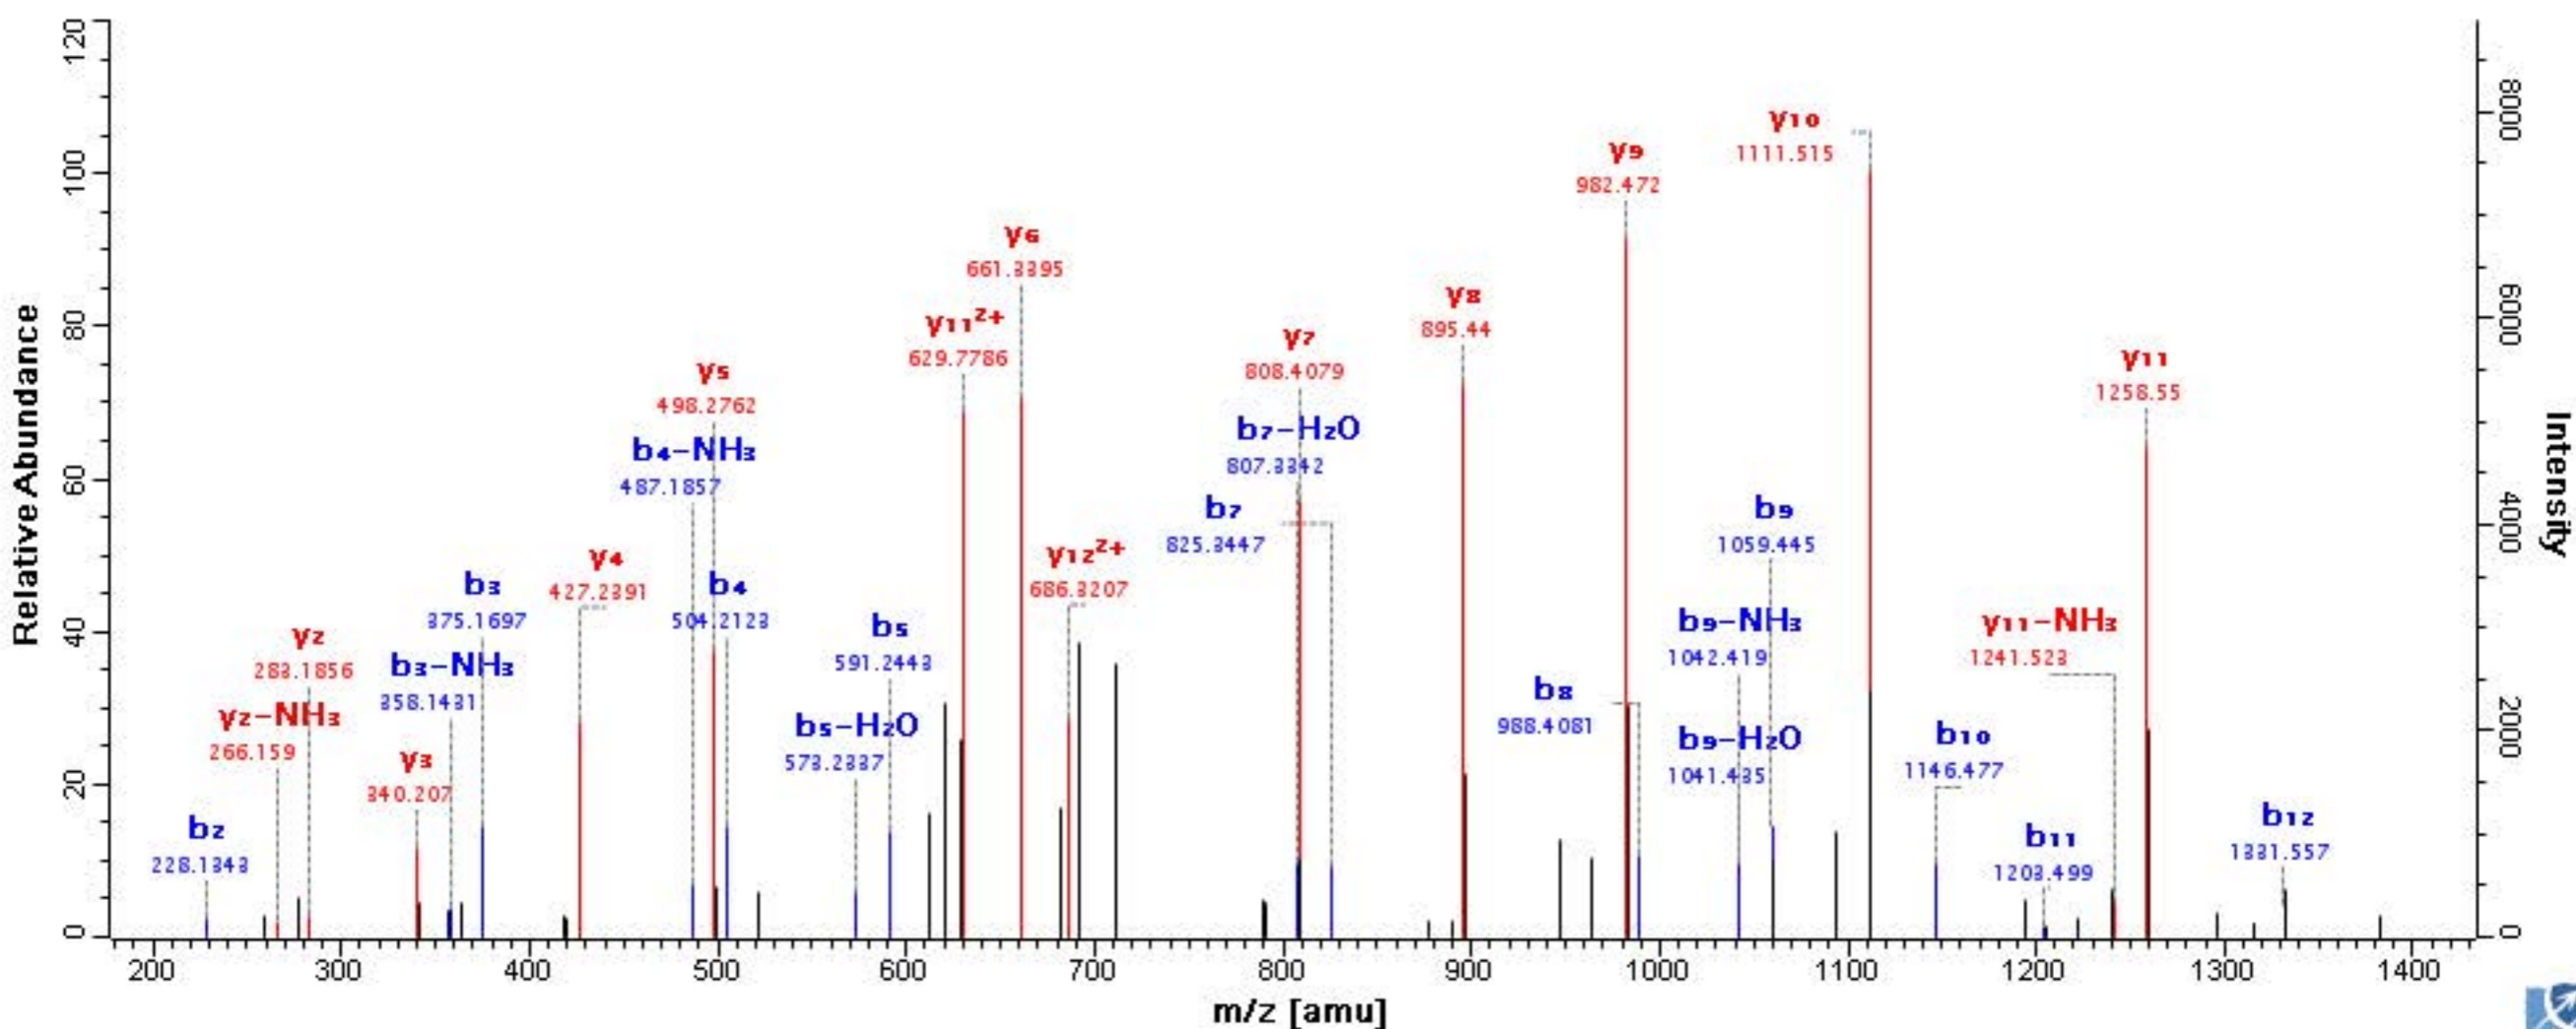

#### precursor information

|                   |                     |
|-------------------|---------------------|
| Mass:             | 1484.66918          |
| m/z:              | System.Collections. |
| Charge:           | System.Collections. |
| Retentiontime:    | System.Collections. |
| Score:            | 210.6389            |
| Mass Error [ppm]: | -0.34277            |
| PEP:              | 2.2485E-52          |
| Precursor Type:   | ISO                 |

#### general information

|                       |           |
|-----------------------|-----------|
| Annotation:           | 11 of 13  |
| AminoAcids Coverage:  | 85 %      |
| Intensity Coverage:   | 65 %      |
| Protein Localisation: | 78 ... 90 |

| b ion      |              |    |     |    | γ ion        |            | γ <sup>2+</sup> ion |            |
|------------|--------------|----|-----|----|--------------|------------|---------------------|------------|
| Δ dalton   | mass         |    | seq |    | Δ dalton     | mass       | Δ dalton            | mass       |
|            | 115.05020391 | 1  | N   | 12 |              |            |                     |            |
| +0.0203342 | 228.13426789 | 2  | I   | 11 | 1371.634042  |            | 686.32065923        | +0.1508984 |
| -0.0173234 | 375.16966712 | 3  | M   | 10 | 1258.549978  | +0.1331275 | 629.77862724        | +0.0530378 |
| +0.0275469 | 504.21226022 | 4  | E   | 9  | 1111.5145788 | +0.0759974 | 1111.5145788        |            |
| +0.0351914 | 591.24428863 | 5  | S   | 8  | 982.47198569 | +0.0994865 | 982.47198569        |            |
|            | 678.27631704 | 6  | S   | 7  | 895.43995728 | +0.0541223 | 895.43995728        |            |
| +0.2185625 | 825.34473095 | 7  | F   | 6  | 808.40792887 | +0.0400081 | 808.40792887        |            |
| +0.0561739 | 988.40805949 | 8  | Y   | 5  | 661.33951495 | +0.0507438 | 661.33951495        |            |
| +0.1461353 | 1059.4451733 | 9  | A   | 4  | 498.27618642 | -0.018496  | 498.27618642        |            |
| +0.2616899 | 1146.4772017 | 10 | S   | 3  | 427.23907263 | -0.0151346 | 427.23907263        |            |
| +0.1288981 | 1203.4986654 | 11 | G   | 2  | 340.20704422 | +0.0325798 | 340.20704422        |            |
| +0.20472   | 1331.5572429 | 12 | Q   | 1  | 283.1855805  | +0.140805  | 283.1855805         |            |
|            |              | 13 | K   | 0  | 155.12700298 |            | 155.12700298        |            |

Source: 20120521\_VR\_Bsu\_TripleSILACrep1\_L2ESLS\_OG\_F04  
 Scannumber: 13782  
 Protein: BSU15130; mraZ; ylib  
 Peptide Score: 191.79  
 Method: ITMS; CID; 3

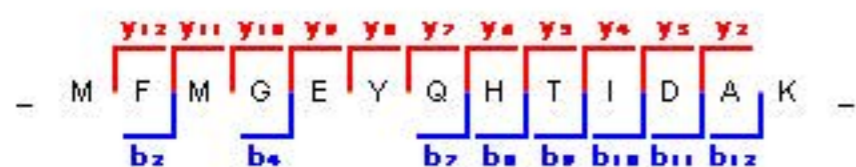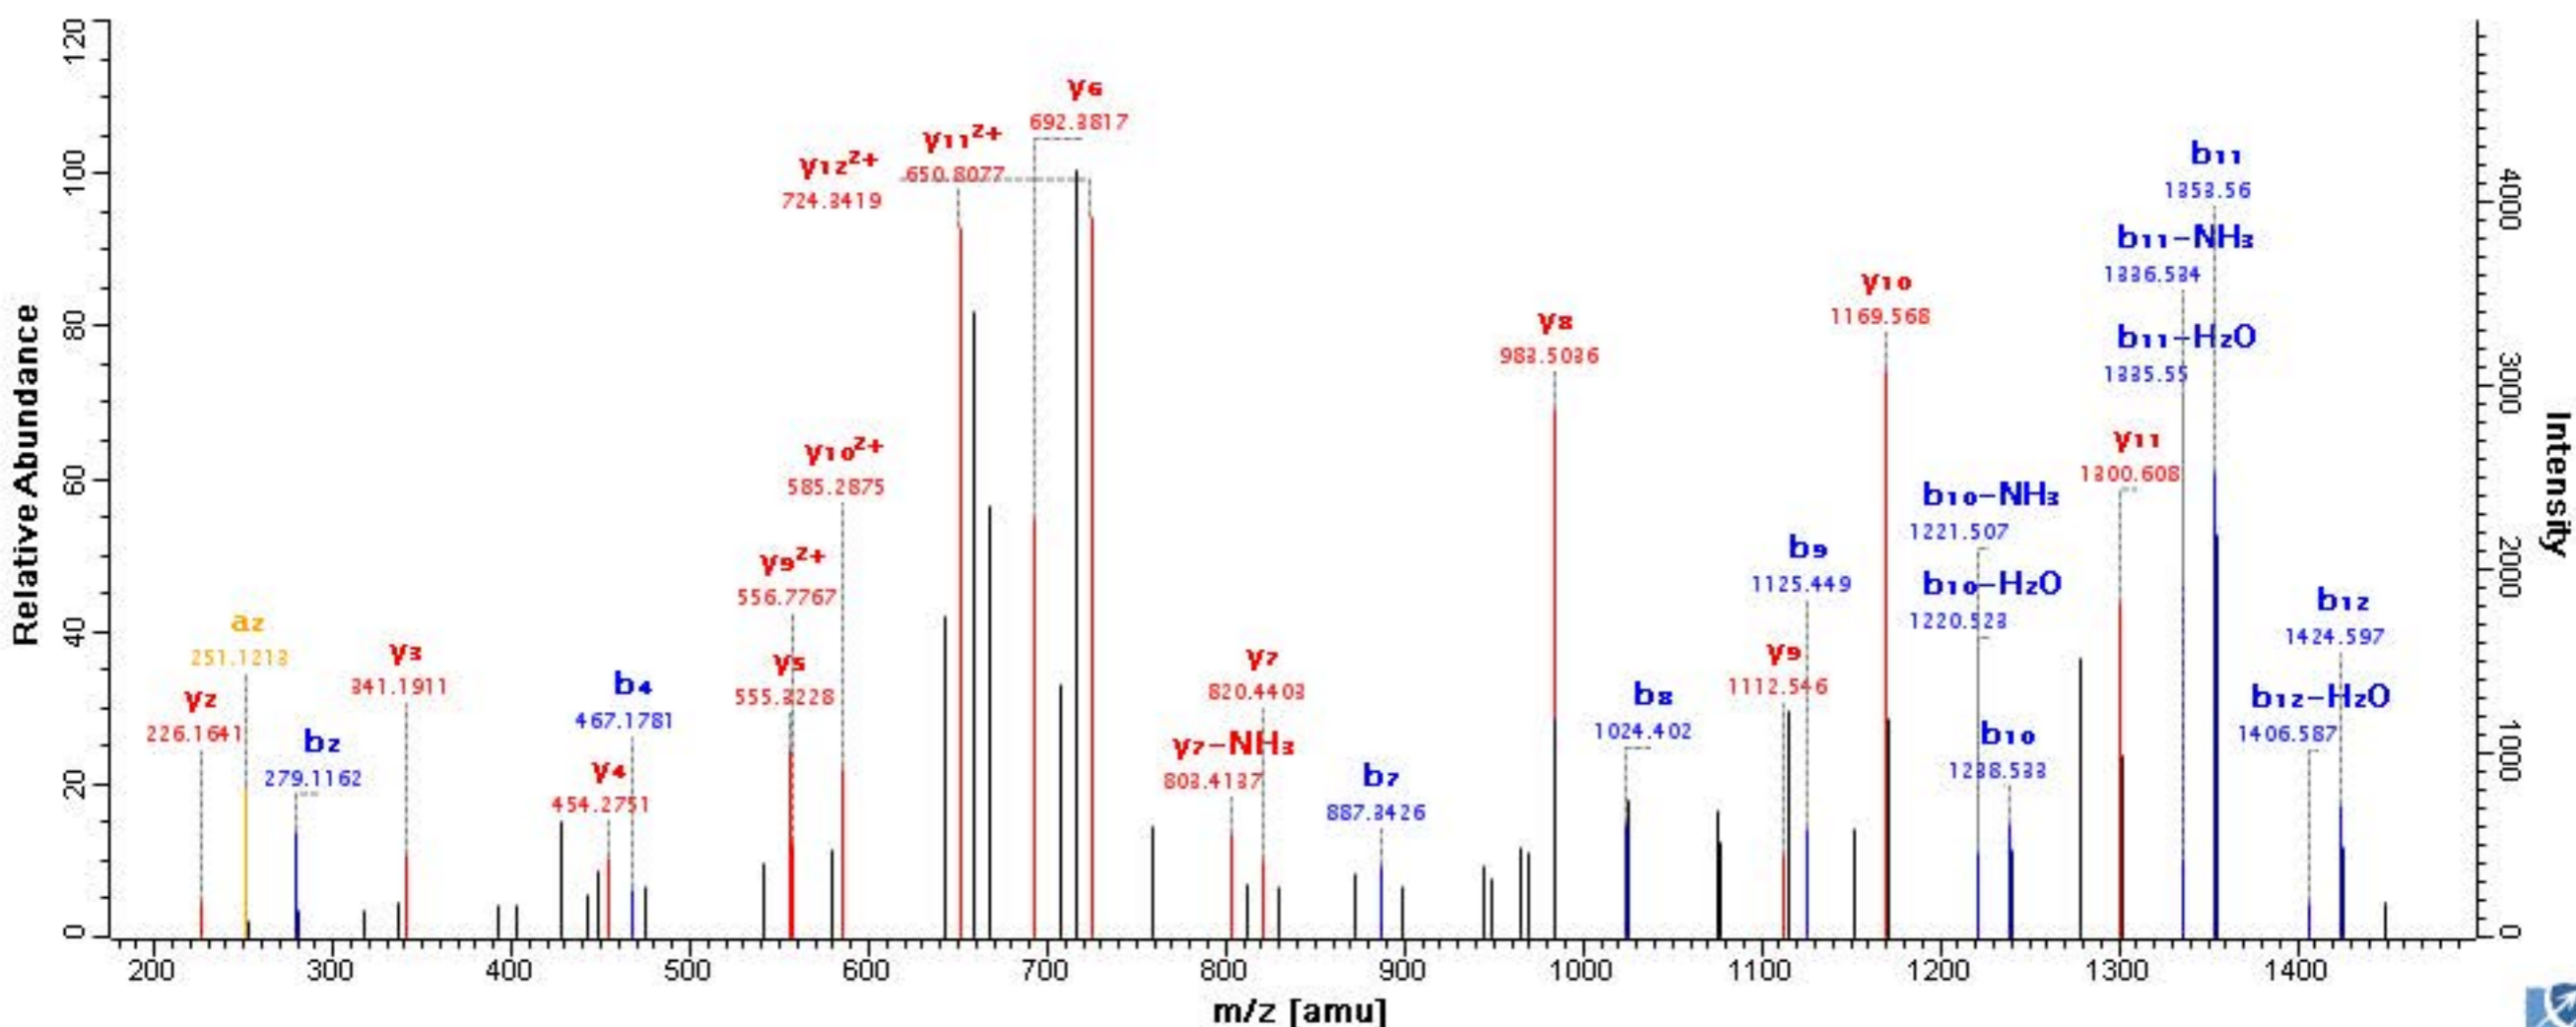

#### precursor information

|                   |                     |
|-------------------|---------------------|
| Mass:             | 0                   |
| m/z:              | System.Collections. |
| Charge:           | System.Collections. |
| Retentiontime:    | System.Collections. |
| Score:            | 191.7854            |
| Mass Error [ppm]: | -0.40656            |
| PEP:              | 4.3458E-166         |
| Precursor Type:   | PEAK                |

#### general information

|                       |          |
|-----------------------|----------|
| Annotation:           | 11 of 13 |
| AminoAcids Coverag    | 85 %     |
| Intensity Coverage:   | 50 %     |
| Protein Localisation: | 1 ... 13 |

| a ion     |          | b ion     |          | seq |   |    | y ion    |           | y <sup>2+</sup> ion |           |
|-----------|----------|-----------|----------|-----|---|----|----------|-----------|---------------------|-----------|
| Δ dalton  | mass     | Δ dalton  | mass     |     |   |    | Δ dalton | mass      | Δ dalton            | mass      |
|           | 104.0528 |           | 132.0478 | 1   | M | 12 |          |           |                     |           |
| +0.005128 | 251.1213 | -0.139796 | 279.1162 | 2   | F | 11 | 1447.677 |           | 724.3419            | +0.310174 |
|           | 382.1617 |           | 410.1567 | 3   | M | 10 | 1300.608 | +0.060051 | 650.8077            | +0.126546 |
|           | 439.1832 | +0.163246 | 467.1781 | 4   | G | 9  | 1169.568 | +0.015697 | 585.2875            | -0.00232  |
|           | 568.2258 |           | 596.2207 | 5   | E | 8  | 1112.546 | +0.04241  | 556.7767            | +0.42223  |
|           | 731.2891 |           | 759.284  | 6   | Y | 7  | 983.5036 | +0.044353 | 983.5036            |           |
|           | 859.3477 | +0.073332 | 887.3426 | 7   | Q | 6  | 820.4403 | +0.164872 | 820.4403            |           |
|           | 996.4066 | +0.066239 | 1024.402 | 8   | H | 5  | 692.3817 | +0.063781 | 692.3817            |           |
|           | 1097.454 | +0.088019 | 1125.449 | 9   | T | 4  | 555.3228 | +0.108716 | 555.3228            |           |
|           | 1210.538 | +0.043017 | 1238.533 | 10  | I | 3  | 454.2751 | -0.042153 | 454.2751            |           |
|           | 1325.565 | +0.011191 | 1353.56  | 11  | D | 2  | 341.1911 | -0.000905 | 341.1911            |           |
|           | 1396.602 | +0.087603 | 1424.597 | 12  | A | 1  | 226.1641 | -0.004205 | 226.1641            |           |
|           |          |           |          | 13  | K | 0  | 155.127  |           | 155.127             |           |



Source: 20120521\_VR\_Bsu\_TripleSILACrep1\_L2ESLS\_OG\_F04  
 Scannumber: 15492  
 Protein: BSU07880; yfkj  
 Peptide Score: 96.64  
 Method: ITMS; CID; 3

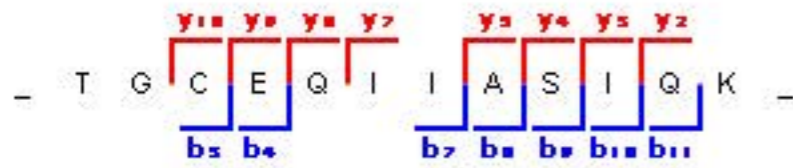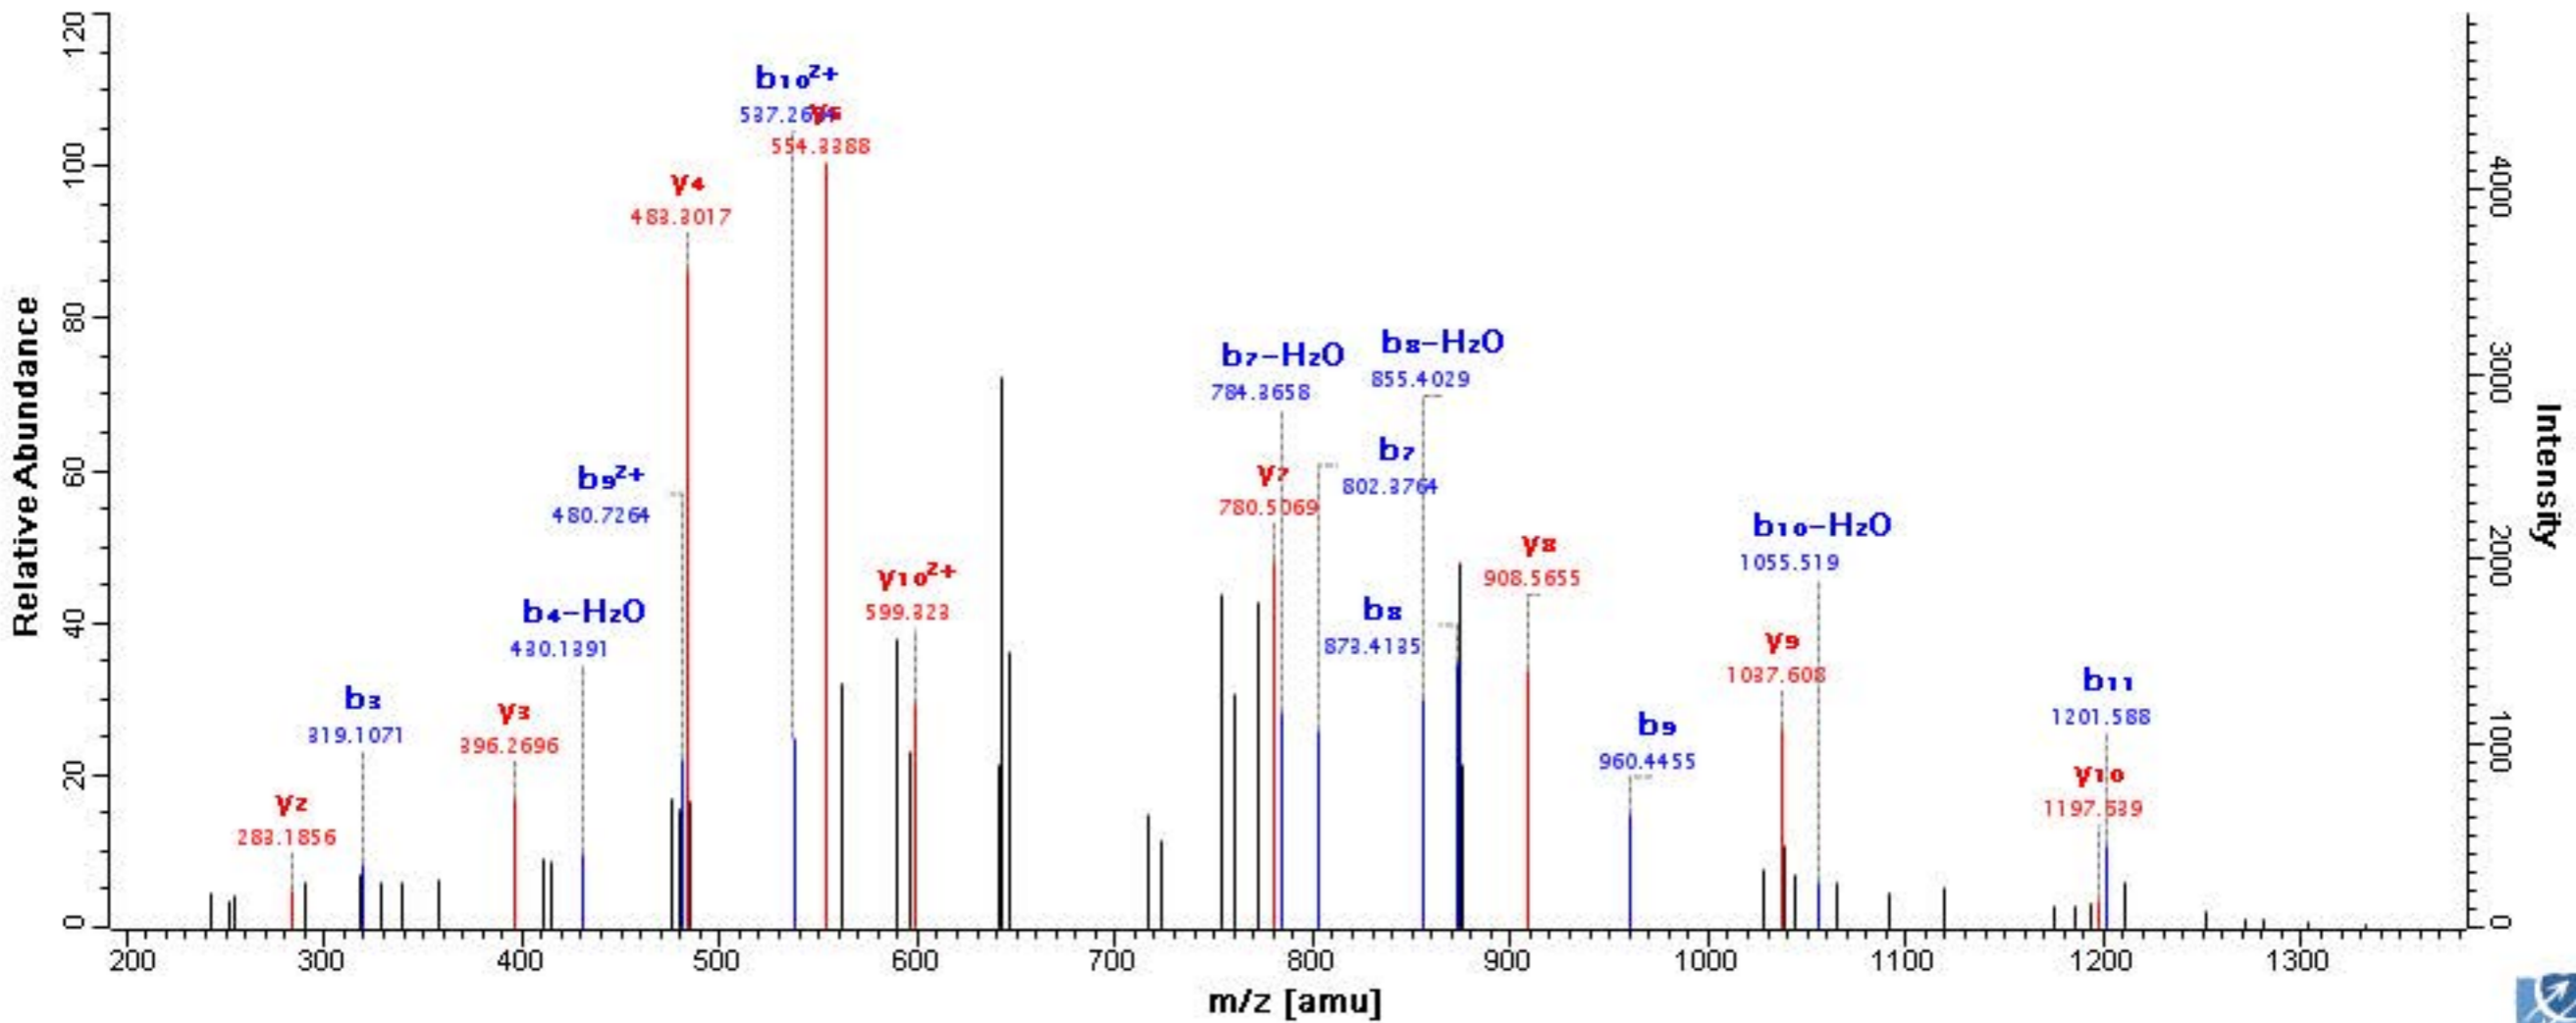

#### precursor information

|                   |                     |
|-------------------|---------------------|
| Mass:             | 1354.70065          |
| m/z:              | System.Collections. |
| Charge:           | System.Collections. |
| Retentiontime:    | System.Collections. |
| Score:            | 96.64039            |
| Mass Error [ppm]: | 0.035834            |
| PEP:              | 0.0017223           |
| Precursor Type:   | ISO                 |

#### general information

|                       |             |
|-----------------------|-------------|
| Annotation:           | 9 of 12     |
| AminoAcids Coverag    | 75 %        |
| Intensity Coverage:   | 48 %        |
| Protein Localisation: | 141 ... 152 |

| b <sup>2+</sup> ion |          | b ion     |          |    | seq |    | γ ion    |           | γ <sup>2+</sup> ion |           |
|---------------------|----------|-----------|----------|----|-----|----|----------|-----------|---------------------|-----------|
| Δ dalton            | mass     | Δ dalton  | mass     |    |     |    | Δ dalton | mass      | Δ dalton            | mass      |
|                     | 102.055  |           | 102.055  | 1  | T   | 11 |          |           |                     |           |
|                     | 159.0764 |           | 159.0764 | 2  | G   | 10 | 1254.66  |           | 1254.66             |           |
|                     | 319.1071 | +0.185719 | 319.1071 | 3  | C   | 9  | 1197.639 | +0.167785 | 599.323             | -0.023566 |
|                     | 448.1497 |           | 448.1497 | 4  | E   | 8  | 1037.608 | +0.09858  | 1037.608            |           |
|                     | 576.2082 |           | 576.2082 | 5  | Q   | 7  | 908.5655 | +0.121336 | 908.5655            |           |
|                     | 689.2923 |           | 689.2923 | 6  | I   | 6  | 780.5069 | +0.134504 | 780.5069            |           |
|                     | 802.3764 | +0.024208 | 802.3764 | 7  | I   | 5  | 667.4229 |           | 667.4229            |           |
|                     | 873.4135 | +0.109653 | 873.4135 | 8  | A   | 4  | 554.3388 | +0.066243 | 554.3388            |           |
| -0.061048           | 480.7264 | +0.316089 | 960.4455 | 9  | S   | 3  | 483.3017 | +0.075707 | 483.3017            |           |
| +0.154916           | 537.2684 |           | 1073.53  | 10 | I   | 2  | 396.2696 | +0.176584 | 396.2696            |           |
|                     | 1201.588 | +0.183213 | 1201.588 | 11 | Q   | 1  | 283.1856 | +0.051663 | 283.1856            |           |
|                     |          |           |          | 12 | K   | 0  | 155.127  |           | 155.127             |           |

Source: 20120521\_VR\_Bsu\_TripleSILACrep1\_L2ESLS\_OG\_F04  
 Scannumber: 16266  
 Protein: BSU39340; hutP  
 Peptide Score: 145.91  
 Method: ITMS; CID; 3

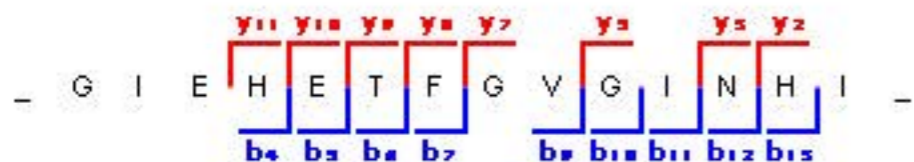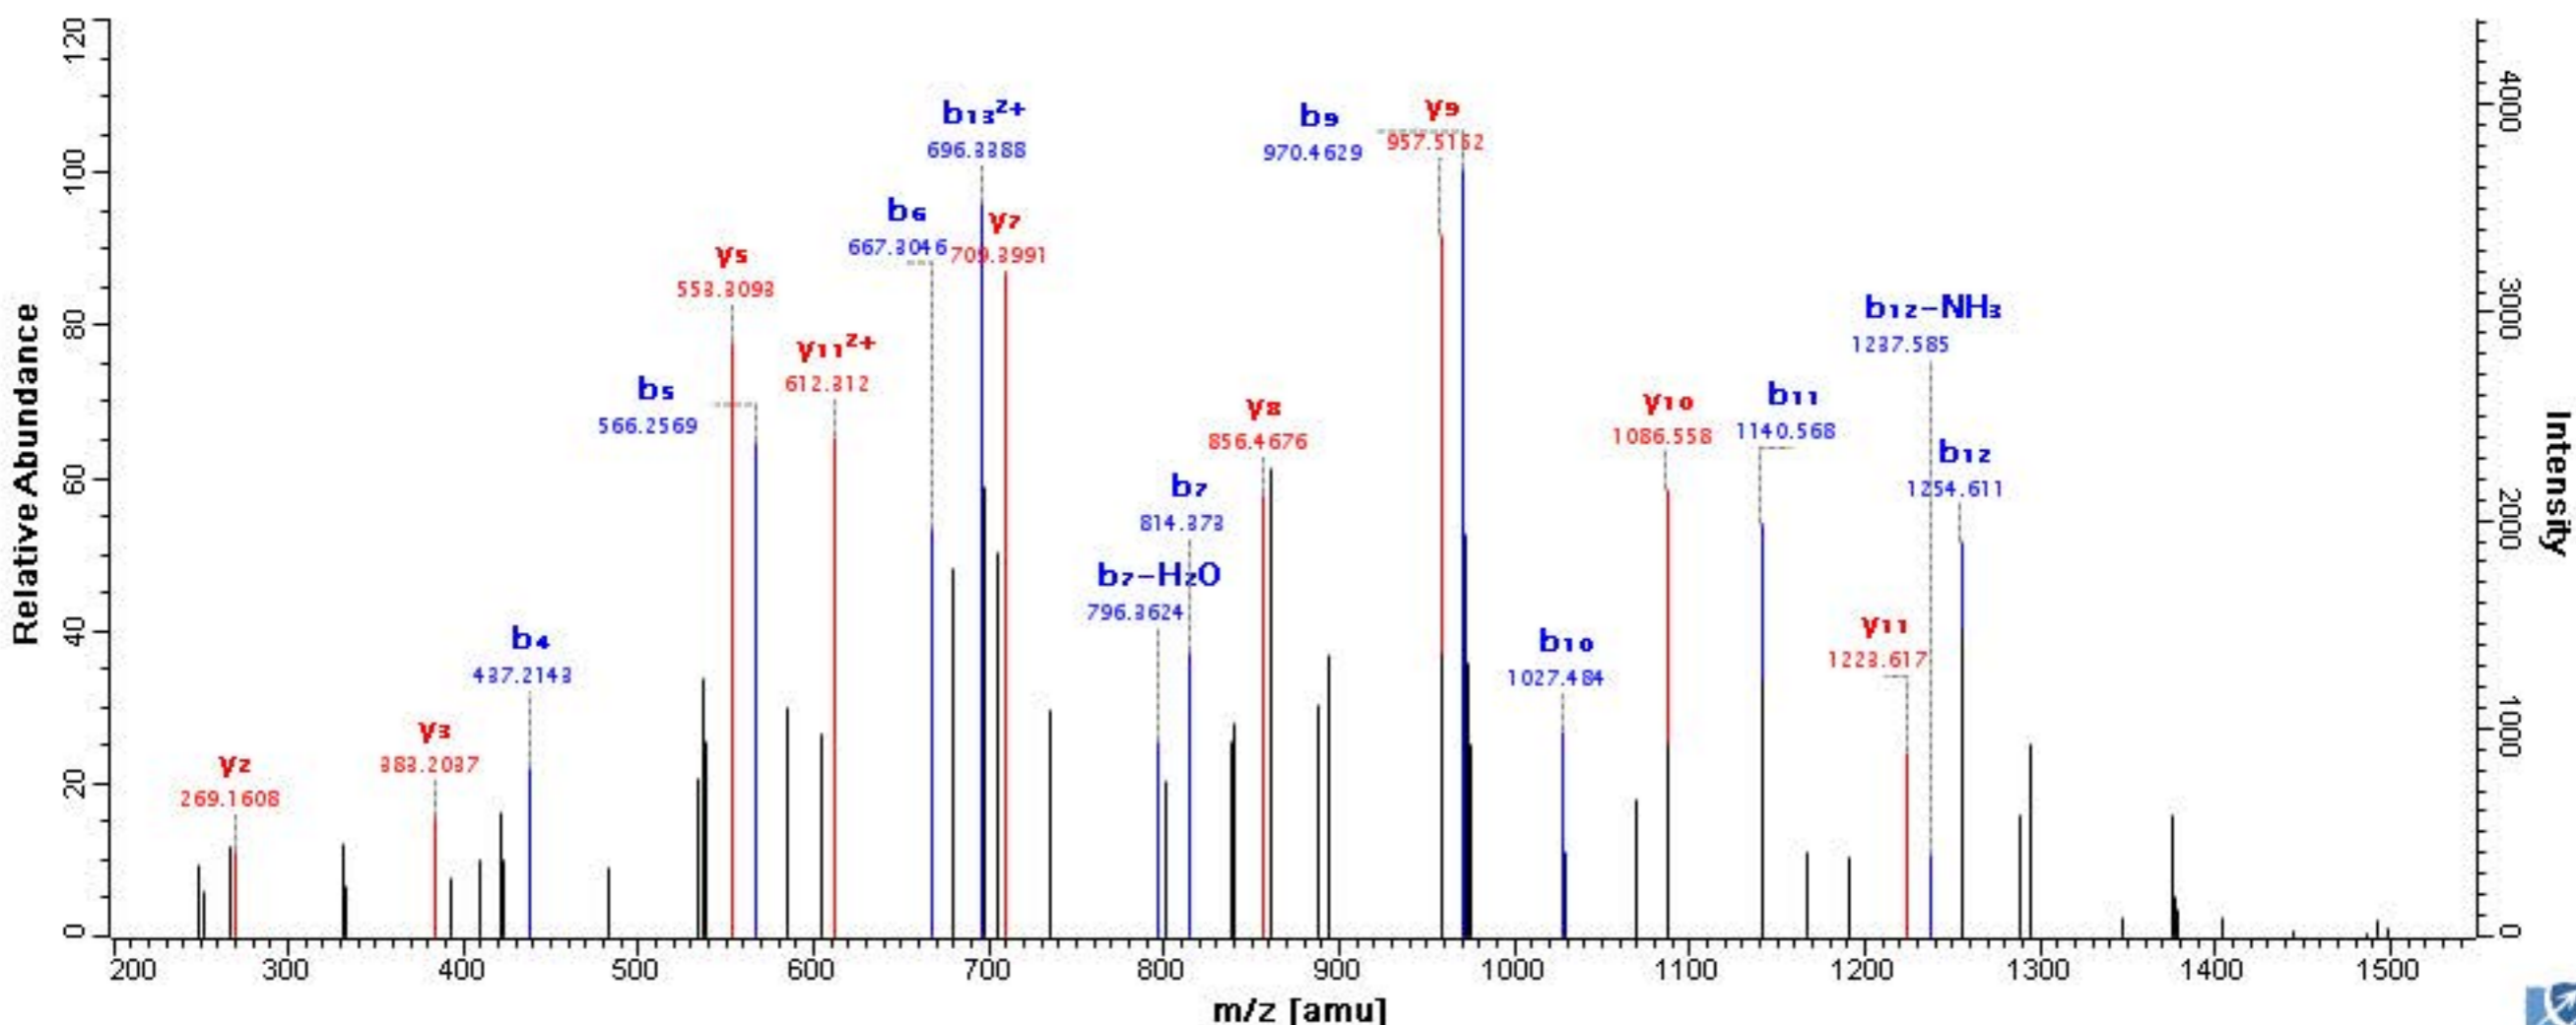

#### precursor information

|                   |                     |
|-------------------|---------------------|
| Mass:             | 0                   |
| m/z:              | System.Collections. |
| Charge:           | System.Collections. |
| Retentiontime:    | System.Collections. |
| Score:            | 145.9146            |
| Mass Error [ppm]: | 2.2852              |
| PEP:              | 1.9488E-63          |
| Precursor Type:   | PEAK                |

#### general information

|                       |             |
|-----------------------|-------------|
| Annotation:           | 10 of 14    |
| AminoAcids Coverage:  | 71 %        |
| Intensity Coverage:   | 50 %        |
| Protein Localisation: | 135 ... 148 |

| b <sup>2+</sup> ion |          | b ion     |          | seq |   |    | y ion    |           | y <sup>2+</sup> ion |           |
|---------------------|----------|-----------|----------|-----|---|----|----------|-----------|---------------------|-----------|
| Δ dalton            | mass     | Δ dalton  | mass     |     |   |    | Δ dalton | mass      | Δ dalton            | mass      |
|                     | 58.02874 |           | 58.02874 | 1   | G | 13 |          |           |                     |           |
|                     | 171.1128 |           | 171.1128 | 2   | I | 12 | 1465.743 |           | 1465.743            |           |
|                     | 300.1554 |           | 300.1554 | 3   | E | 11 | 1352.659 |           | 1352.659            |           |
|                     | 437.2143 | +0.200852 | 437.2143 | 4   | H | 10 | 1223.617 | +0.110914 | 612.312             | +0.177002 |
|                     | 566.2569 | +0.108332 | 566.2569 | 5   | E | 9  | 1086.558 | +0.120509 | 1086.558            |           |
|                     | 667.3046 | +0.217636 | 667.3046 | 6   | T | 8  | 957.5152 | +0.097124 | 957.5152            |           |
|                     | 814.373  | +0.092276 | 814.373  | 7   | F | 7  | 856.4676 | +0.089016 | 856.4676            |           |
|                     | 871.3945 |           | 871.3945 | 8   | G | 6  | 709.3991 | +0.094808 | 709.3991            |           |
|                     | 970.4629 | +0.137286 | 970.4629 | 9   | V | 5  | 652.3777 |           | 652.3777            |           |
|                     | 1027.484 | -0.074058 | 1027.484 | 10  | G | 4  | 553.3093 | +0.06823  | 553.3093            |           |
|                     | 1140.568 | +0.125326 | 1140.568 | 11  | I | 3  | 496.2878 |           | 496.2878            |           |
|                     | 1254.611 | +0.133057 | 1254.611 | 12  | N | 2  | 383.2037 | +0.24285  | 383.2037            |           |
| +0.16881            | 696.3388 |           | 1391.67  | 13  | H | 1  | 269.1608 | +0.11378  | 269.1608            |           |
|                     |          |           |          | 14  | I | 0  | 132.1019 |           | 132.1019            |           |

Source: 20120521\_VR\_Bsu\_TripleSILACrep1\_L2ESLS\_OG\_F04  
 Scannumber: 16647  
 Protein: BSU35070; yvmC  
 Peptide Score: 226.29  
 Method: ITMS; CID; 3

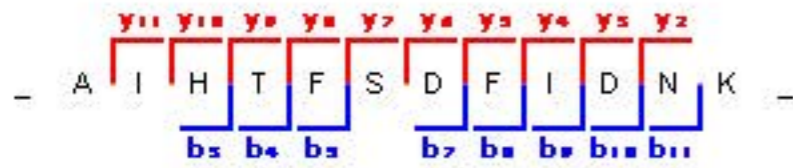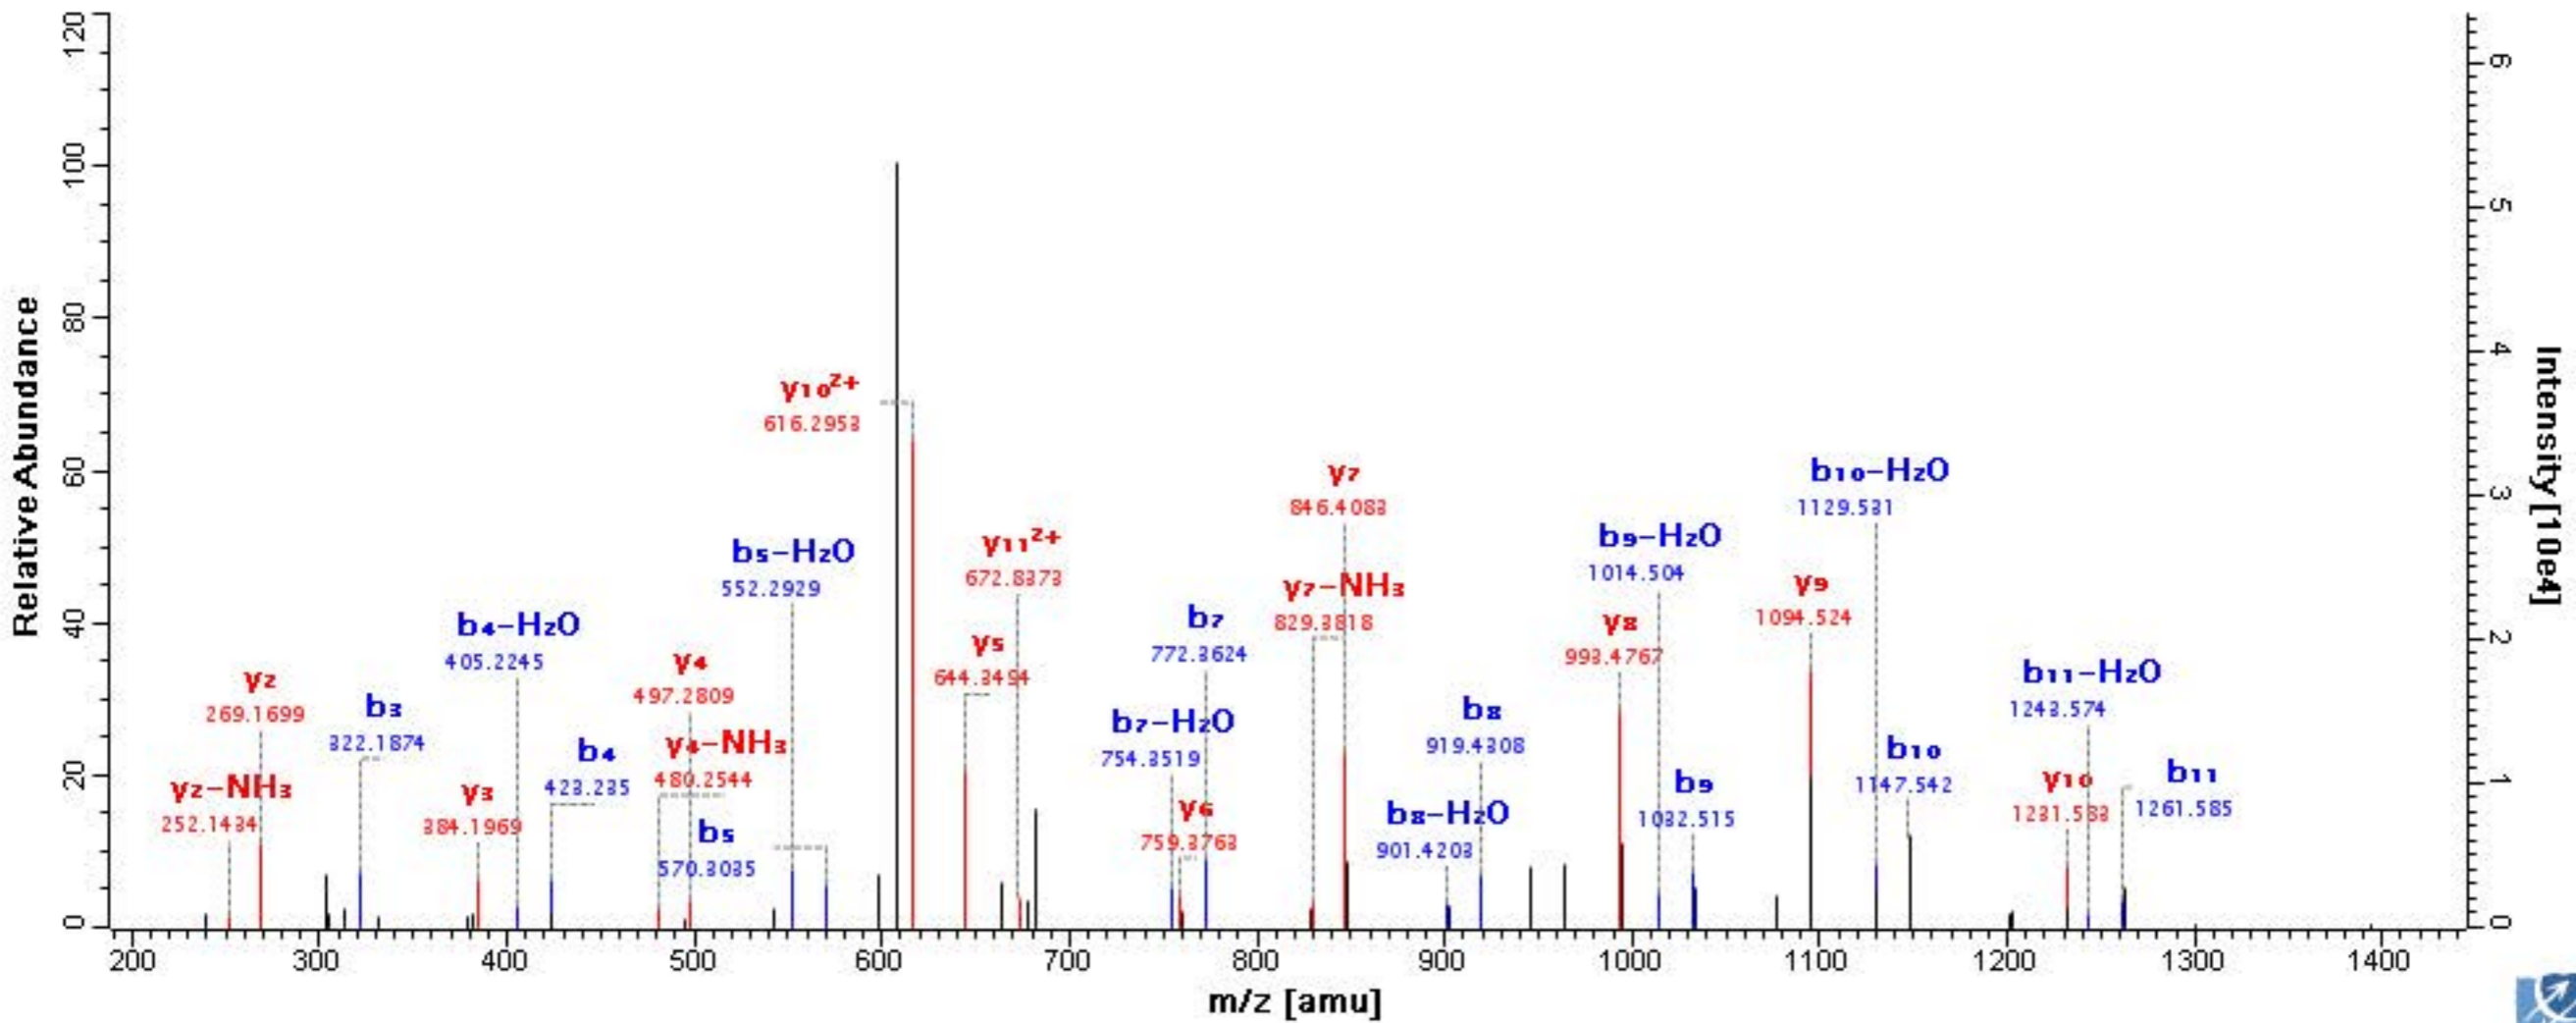

#### precursor information

|                   |                     |
|-------------------|---------------------|
| Mass:             | 1414.69764          |
| m/z:              | System.Collections. |
| Charge:           | System.Collections. |
| Retentiontime:    | System.Collections. |
| Score:            | 226.2873            |
| Mass Error [ppm]: | 0.29122             |
| PEP:              | 1.0945E-74          |
| Precursor Type:   | ISO                 |

#### general information

|                       |             |
|-----------------------|-------------|
| Annotation:           | 10 of 12    |
| AminoAcids Coverage:  | 83 %        |
| Intensity Coverage:   | 53 %        |
| Protein Localisation: | 113 ... 124 |

| b ion           |              |    |     |    | $\gamma$ ion    |            | $\gamma^{2+}$ ion |            |
|-----------------|--------------|----|-----|----|-----------------|------------|-------------------|------------|
| $\Delta$ dalton | mass         |    | seq |    | $\Delta$ dalton | mass       | $\Delta$ dalton   | mass       |
|                 | 72.044390254 | 1  | A   | 11 |                 |            |                   |            |
|                 | 185.12845423 | 2  | I   | 10 | 1344.667391     |            | 672.83733375      | +0.2199783 |
| -0.0818363      | 322.1873661  | 3  | H   | 9  | 1231.5833271    | +0.0623028 | 616.29530176      | +0.1393296 |
| -0.0027142      | 423.23504457 | 4  | T   | 8  | 1094.5244152    | +0.0333241 | 1094.5244152      |            |
| +0.0268027      | 570.30345849 | 5  | F   | 7  | 993.47673672    | +0.0550626 | 993.47673672      |            |
|                 | 657.3354869  | 6  | S   | 6  | 846.4083228     | +0.0703149 | 846.4083228       |            |
| +0.0869109      | 772.36242993 | 7  | D   | 5  | 759.37629439    | +0.0363033 | 759.37629439      |            |
| +0.1056552      | 919.43084385 | 8  | F   | 4  | 644.34935136    | +0.0828996 | 644.34935136      |            |
| +0.088974       | 1032.5149078 | 9  | I   | 3  | 497.28093744    | +0.1149366 | 497.28093744      |            |
| +0.0329782      | 1147.5418509 | 10 | D   | 2  | 384.19687346    | -0.0140121 | 384.19687346      |            |
| +0.0098262      | 1261.5847783 | 11 | N   | 1  | 269.16993043    | -0.0643396 | 269.16993043      |            |
|                 |              | 12 | K   | 0  | 155.12700298    |            | 155.12700298      |            |

Source: 20120521\_VR\_Bsu\_TripleSILACrep1\_L2ESLS\_OG\_F04  
 Scannumber: 21151  
 Protein: BSU26300; yqa1  
 Peptide Score: 65.29  
 Method: ITMS; CID; 3

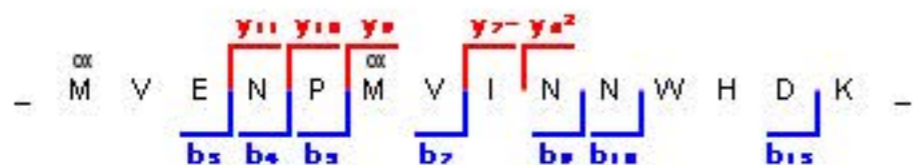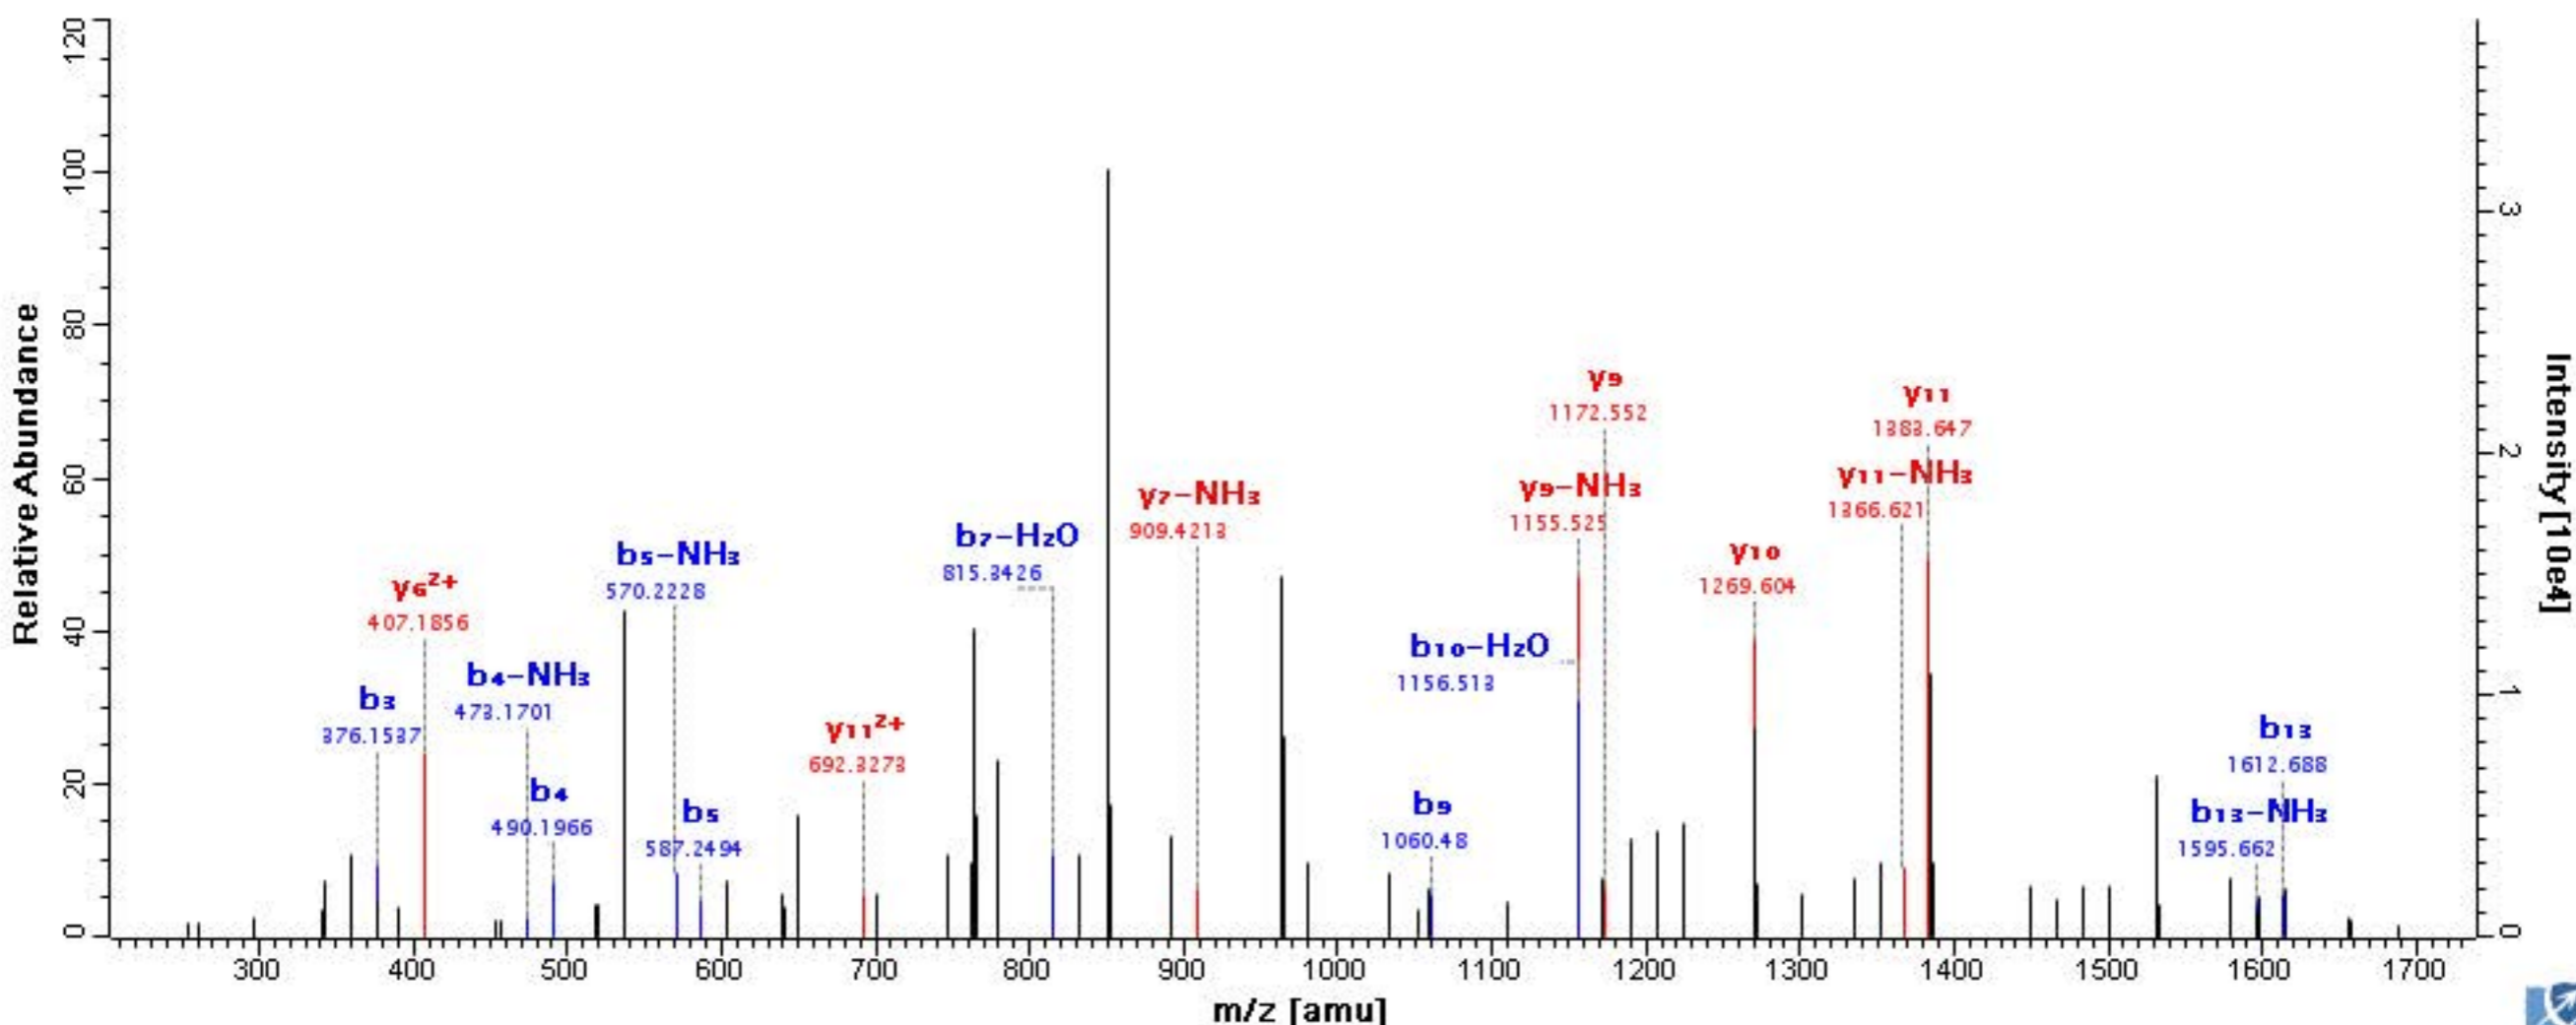

#### precursor information

|                   |                     |
|-------------------|---------------------|
| Mass:             | 1757.78755          |
| m/z:              | System.Collections. |
| Charge:           | System.Collections. |
| Retentiontime:    | System.Collections. |
| Score:            | 65.2948             |
| Mass Error [ppm]: | 0.58555             |
| PEP:              | 0.002097            |
| Precursor Type:   | MULTI               |

#### general information

|                       |          |
|-----------------------|----------|
| Annotation:           | 9 of 14  |
| AminoAcids Coverage:  | 64%      |
| Intensity Coverage:   | 25%      |
| Protein Localisation: | 1 ... 14 |

| b ion      |              |    |     |    | γ ion        |            | γ <sup>2+</sup> ion |            |
|------------|--------------|----|-----|----|--------------|------------|---------------------|------------|
| Δ dalton   | mass         |    | seq |    | Δ dalton     | mass       | Δ dalton            | mass       |
|            | 148.04267569 | 1  | M   | 13 |              |            |                     |            |
|            | 247.11108961 | 2  | V   | 12 | 1611.7584023 |            | 1611.7584023        |            |
| +0.1123695 | 376.15368271 | 3  | E   | 11 | 1512.6899884 |            | 1512.6899884        |            |
| +0.1105798 | 490.19661015 | 4  | N   | 10 | 1383.6473953 | +0.0238693 | 692.3273359         | -0.0266157 |
| +0.0453037 | 587.24937401 | 5  | P   | 9  | 1269.6044679 | +0.0193114 | 1269.6044679        |            |
|            | 734.28477323 | 6  | M   | 8  | 1172.551704  | +0.043877  | 1172.551704         |            |
|            | 833.35318715 | 7  | V   | 7  | 1025.5163048 |            | 1025.5163048        |            |
|            | 946.43725113 | 8  | I   | 6  | 926.44789089 |            | 926.44789089        |            |
| -0.2249296 | 1060.4801786 | 9  | N   | 5  | 813.36382691 |            | 407.18555169        | +0.2124891 |
|            | 1174.523106  | 10 | N   | 4  | 699.32089947 |            | 699.32089947        |            |
|            | 1360.602419  | 11 | W   | 3  | 585.27797202 |            | 585.27797202        |            |
|            | 1497.6613308 | 12 | H   | 2  | 399.19865906 |            | 399.19865906        |            |
| +0.0518384 | 1612.6882739 | 13 | D   | 1  | 262.1397472  |            | 262.1397472         |            |
|            |              | 14 | K   | 0  | 147.11280417 |            | 147.11280417        |            |

Source: 20120521\_VR\_Bsu\_TripleSILACrep1\_L2ESLS\_OG\_F04  
 Scannumber: 22726  
 Protein: BSU14880; ctaB2  
 Peptide Score: 178.65  
 Method: ITMS; CID; 3

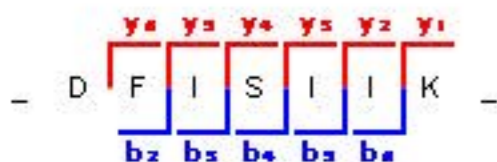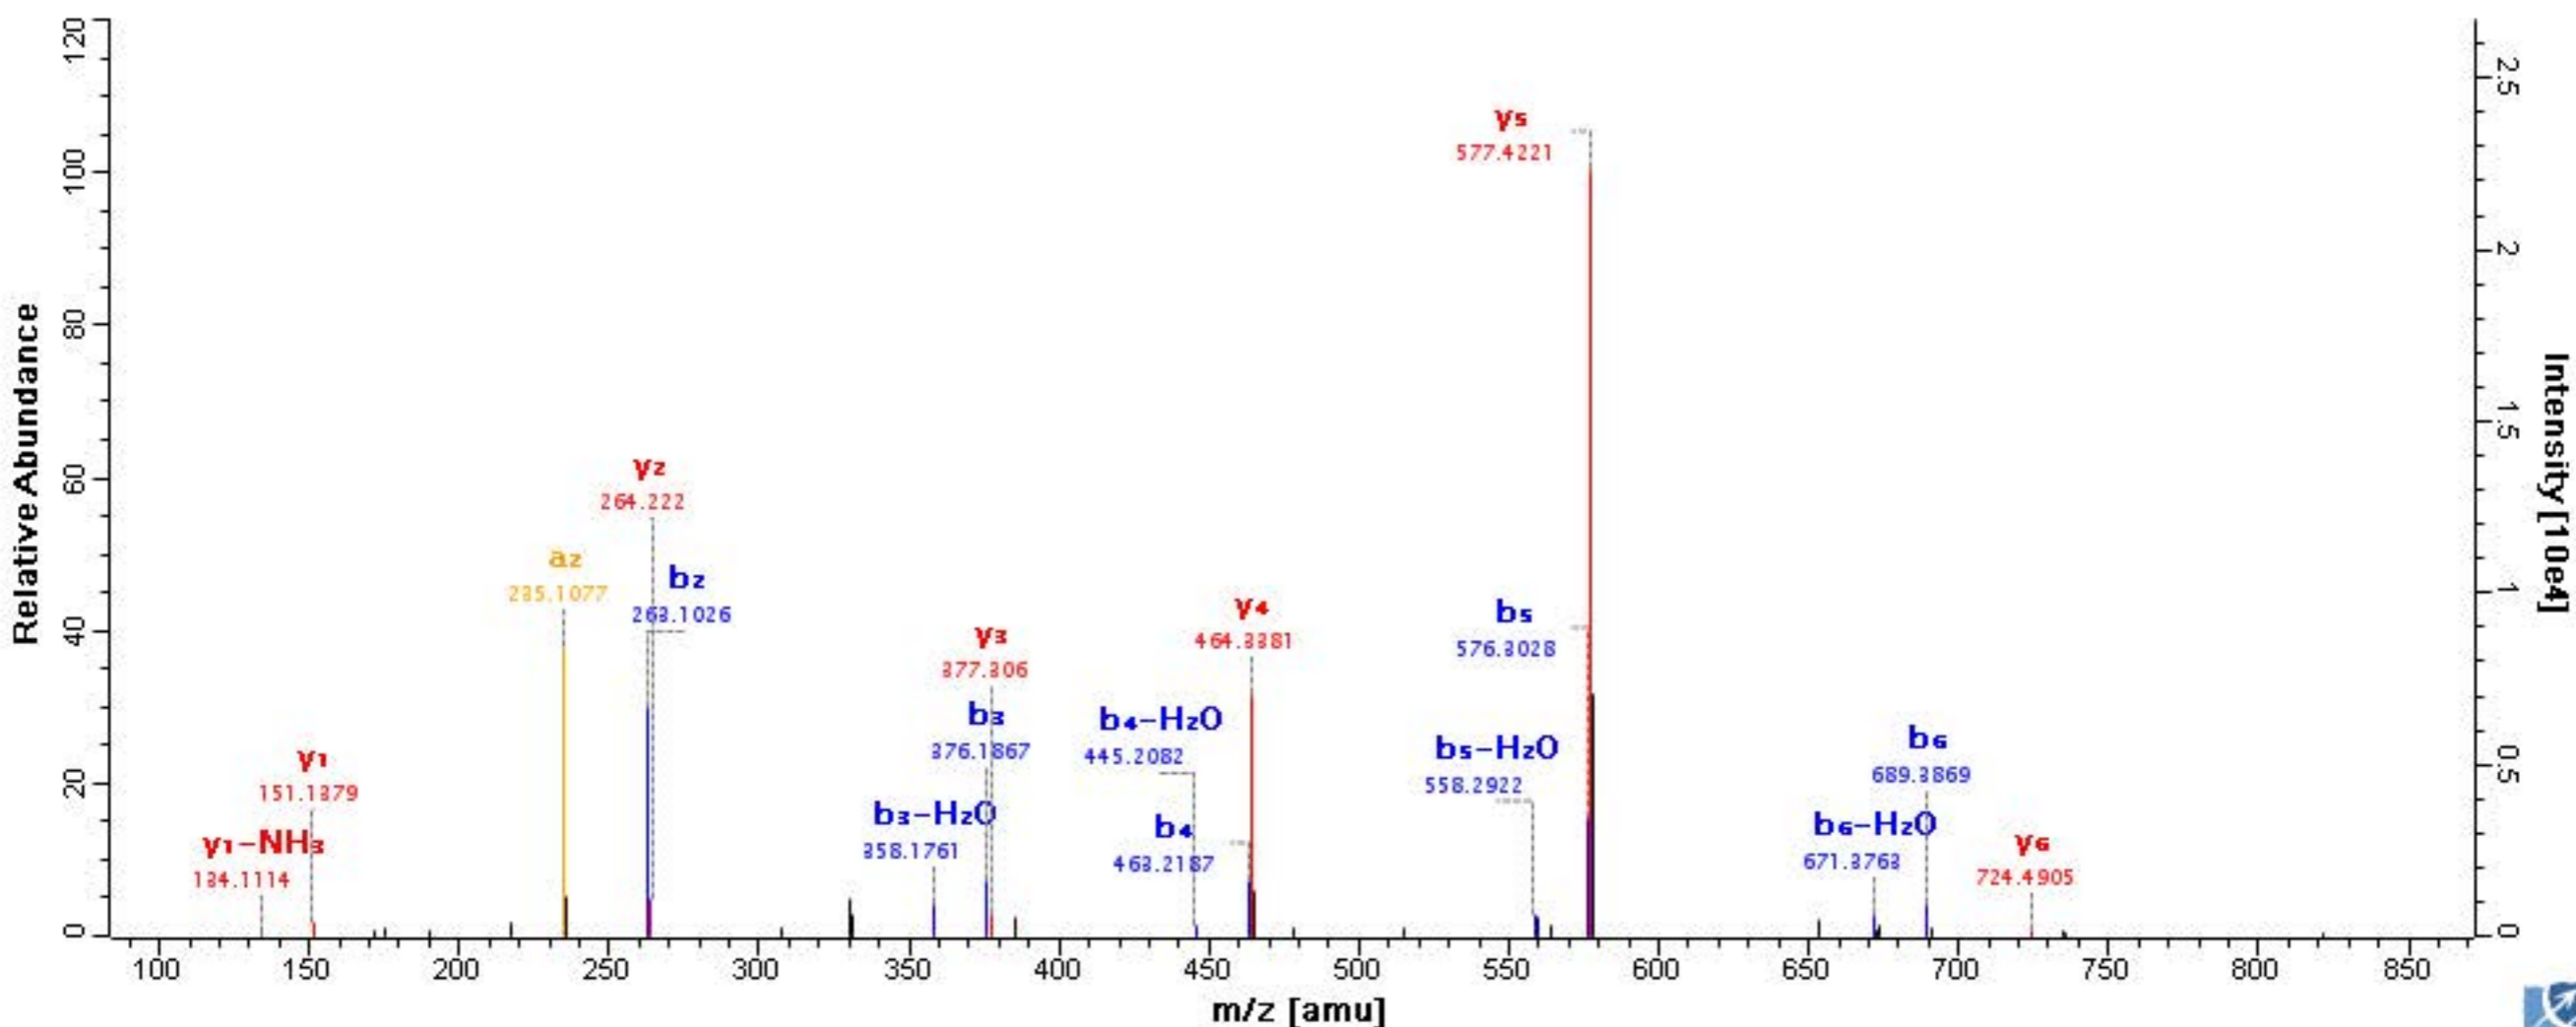

**precursor information**

|                       |                     |
|-----------------------|---------------------|
| Mass:                 | 834.48541           |
| m/z:                  | System.Collections. |
| Charge:               | System.Collections. |
| Retentiontime:        | System.Collections. |
| Score:                | 178.6466            |
| Mass Error [ppm]:     | 0.36679             |
| g PFP:                | 1.7664E-14          |
| Annotation:           | 6 of 7              |
| AminoAcids Coverag    | 86 %                |
| Intensity Coverage:   | 79 %                |
| Protein Localisation: | 24 ... 30           |

| a ion      |              | b ion      |              |   |     |   | y ion        |            |
|------------|--------------|------------|--------------|---|-----|---|--------------|------------|
| Δ dalton   | mass         | Δ dalton   | mass         |   | seq |   | Δ dalton     | mass       |
|            | 88.039304876 |            | 116.0342195  | 1 | D   | 6 |              |            |
| -0.0541757 | 235.10771879 | -0.0660734 | 263.10263341 | 2 | F   | 5 | 724.49054542 | -0.2066709 |
|            | 348.19178277 | -0.000235  | 376.1866974  | 3 | I   | 4 | 577.42213151 | +0.0347166 |
|            | 435.22381118 | +0.1518186 | 463.21872581 | 4 | S   | 3 | 464.33806752 | +0.0206361 |
|            | 548.30787516 | +0.1527156 | 576.30278979 | 5 | I   | 2 | 377.30603912 | -0.0214932 |
|            | 661.39193914 | +0.0593132 | 689.38685377 | 6 | I   | 1 | 264.22197513 | -0.1741541 |
|            |              |            |              | 7 | K   | 0 | 151.13791115 | +0.0584389 |

Source: 20120521\_VR\_Bsu\_TripleSILACrep1\_L2ESLS\_OG\_F04  
 Scannumber: 26883  
 Protein: BSU37530; ywhC  
 Peptide Score: 211.35  
 Method: ITMS; CID; 3

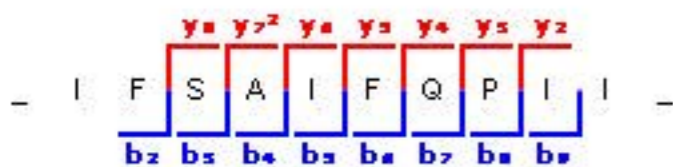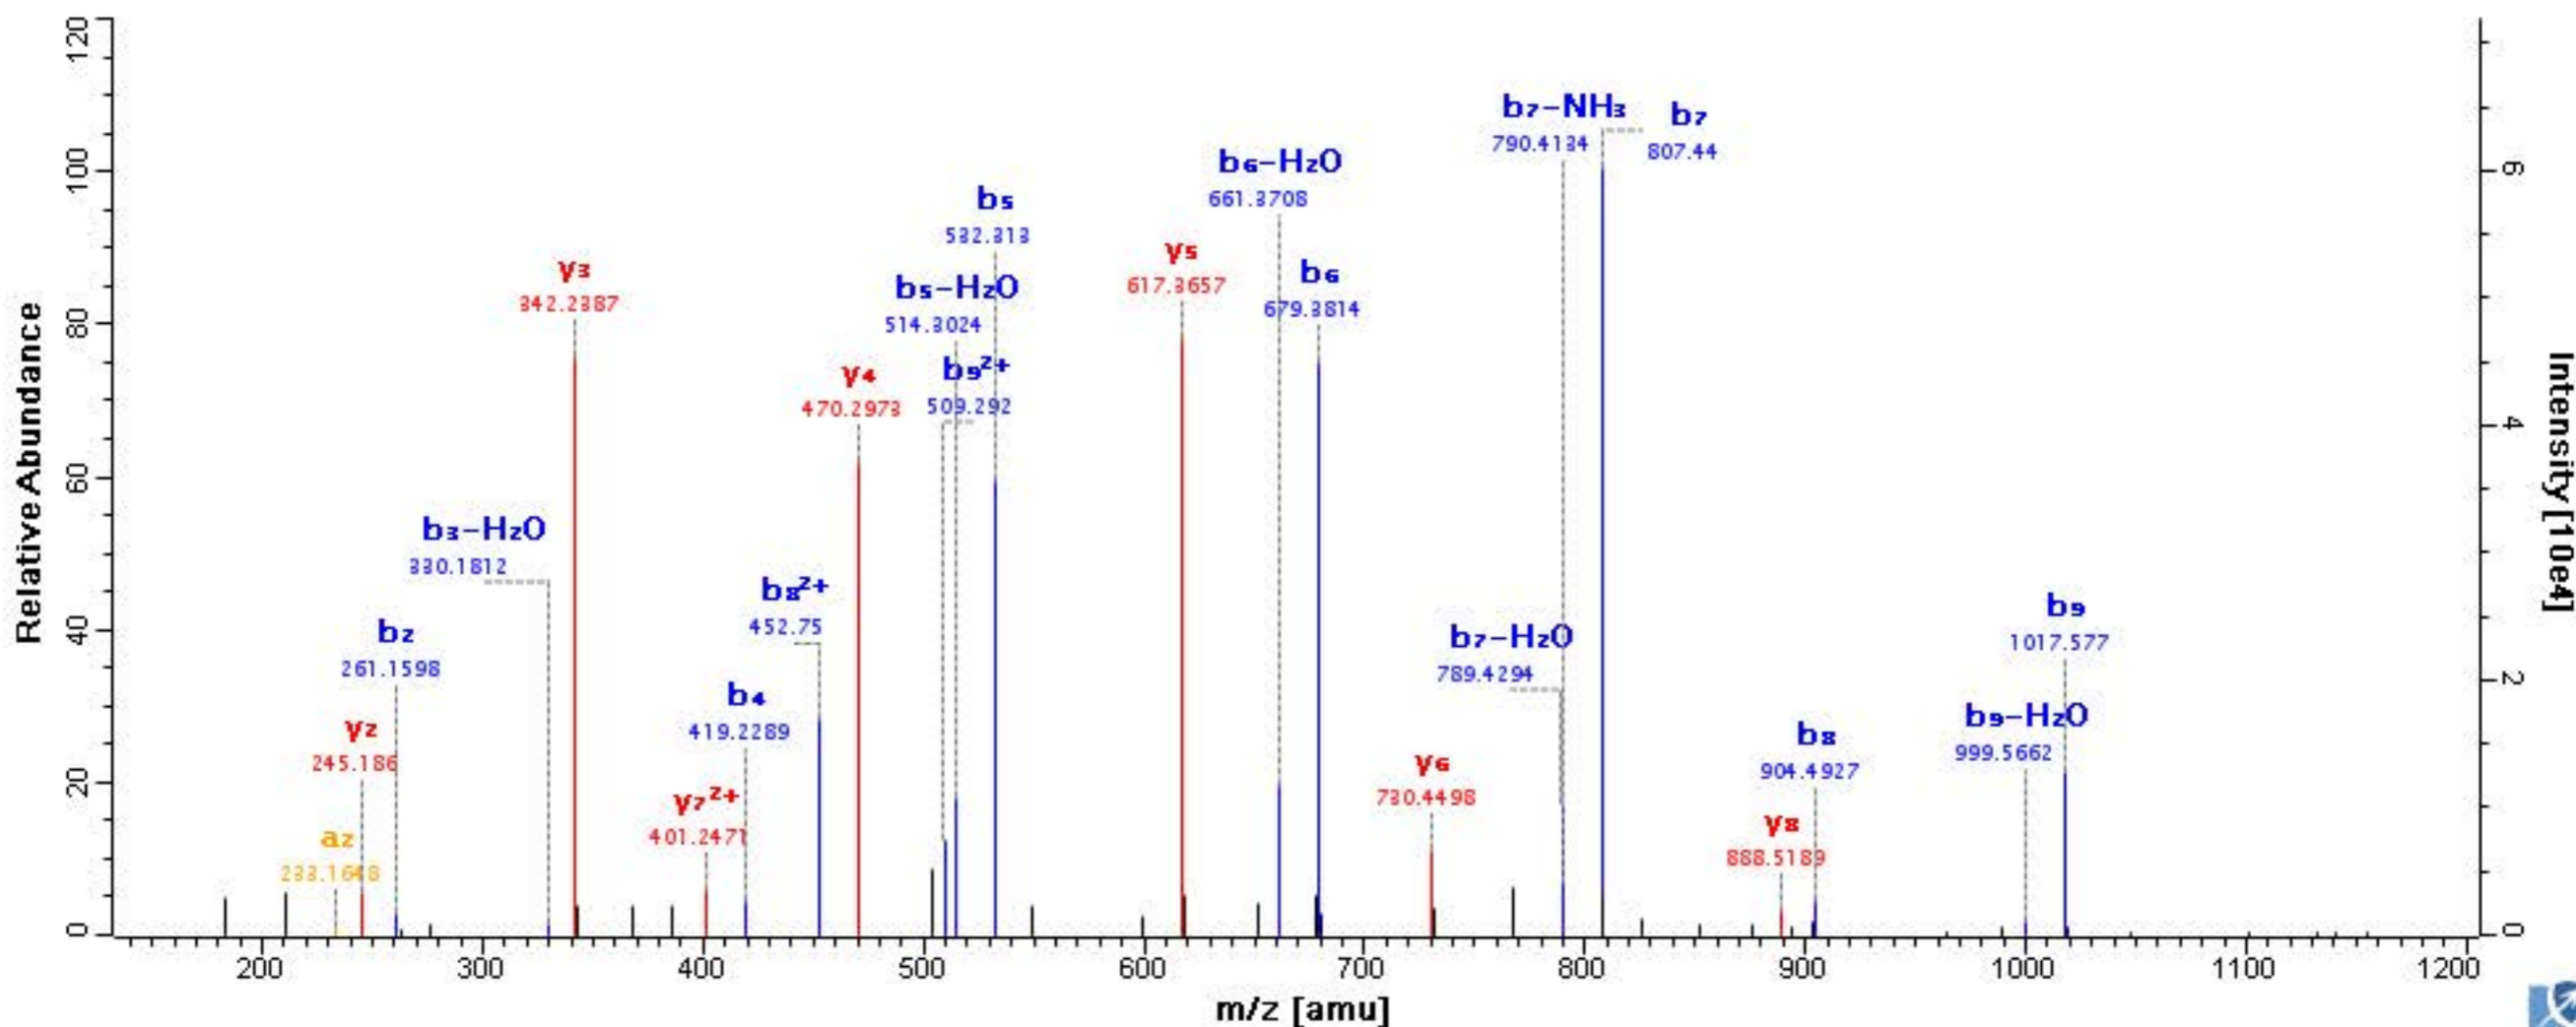

#### precursor information

|                   |                     |
|-------------------|---------------------|
| Mass:             | 1147.6632           |
| m/z:              | System.Collections. |
| Charge:           | System.Collections. |
| Retentiontime:    | System.Collections. |
| Score:            | 211.3471            |
| Mass Error [ppm]: | -0.81517            |
| PEP:              | 2.8115E-44          |
| Precursor Type:   | ISO                 |

#### general information

|                       |             |
|-----------------------|-------------|
| Annotation:           | 8 of 10     |
| AminoAcids Coverage:  | 80 %        |
| Intensity Coverage:   | 88 %        |
| Protein Localisation: | 210 ... 219 |

| a ion    |         | b <sup>2+</sup> ion |         | b ion    |         |    |     |   | y ion    |          | y <sup>2+</sup> ion |         |         |
|----------|---------|---------------------|---------|----------|---------|----|-----|---|----------|----------|---------------------|---------|---------|
| Δ dalton | mass    | Δ dalton            | mass    | Δ dalton | mass    |    | seq |   | Δ dalton | mass     | Δ dalton            | mass    |         |
|          | 86.0964 |                     | 114.091 |          | 114.091 | 1  | I   | 9 |          |          |                     |         |         |
| +0.14409 | 233.165 |                     | 261.16  | +0.0462  | 261.16  | 2  | F   | 8 | 1035.59  |          |                     | 1035.59 |         |
|          | 320.197 |                     | 348.192 |          | 348.192 | 3  | S   | 7 | 888.519  | +0.30999 |                     | 888.519 |         |
|          | 391.234 |                     | 419.229 | +0.15794 | 419.229 | 4  | A   | 6 | 801.487  |          |                     | 401.247 | -0.0192 |
|          | 504.318 |                     | 532.313 | +0.06863 | 532.313 | 5  | I   | 5 | 730.45   | +0.0518  |                     | 730.45  |         |
|          | 651.386 |                     | 679.381 | +0.06314 | 679.381 | 6  | F   | 4 | 617.366  | +0.05035 |                     | 617.366 |         |
|          | 779.445 |                     | 807.44  | +0.12627 | 807.44  | 7  | Q   | 3 | 470.297  | +0.05883 |                     | 470.297 |         |
|          | 876.498 | -0.1279             | 452.75  | +0.20522 | 904.493 | 8  | P   | 2 | 342.239  | +0.02659 |                     | 342.239 |         |
|          | 989.582 | +0.03854            | 509.292 | +0.14588 | 1017.58 | 9  | I   | 1 | 245.186  | +0.05262 |                     | 245.186 |         |
|          |         |                     |         |          |         | 10 | I   | 0 | 132.102  |          |                     | 132.102 |         |

Source: 20120521\_VR\_Bsu\_TripleSILACrep1\_L2ESLS\_OG\_F04  
 Scannumber: 9934  
 Protein: BSU02270; pss; pssA  
 Peptide Score: 173.71  
 Method: ITMS; CID; 3

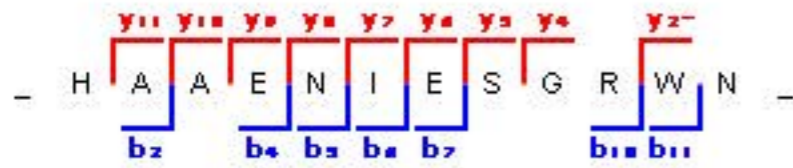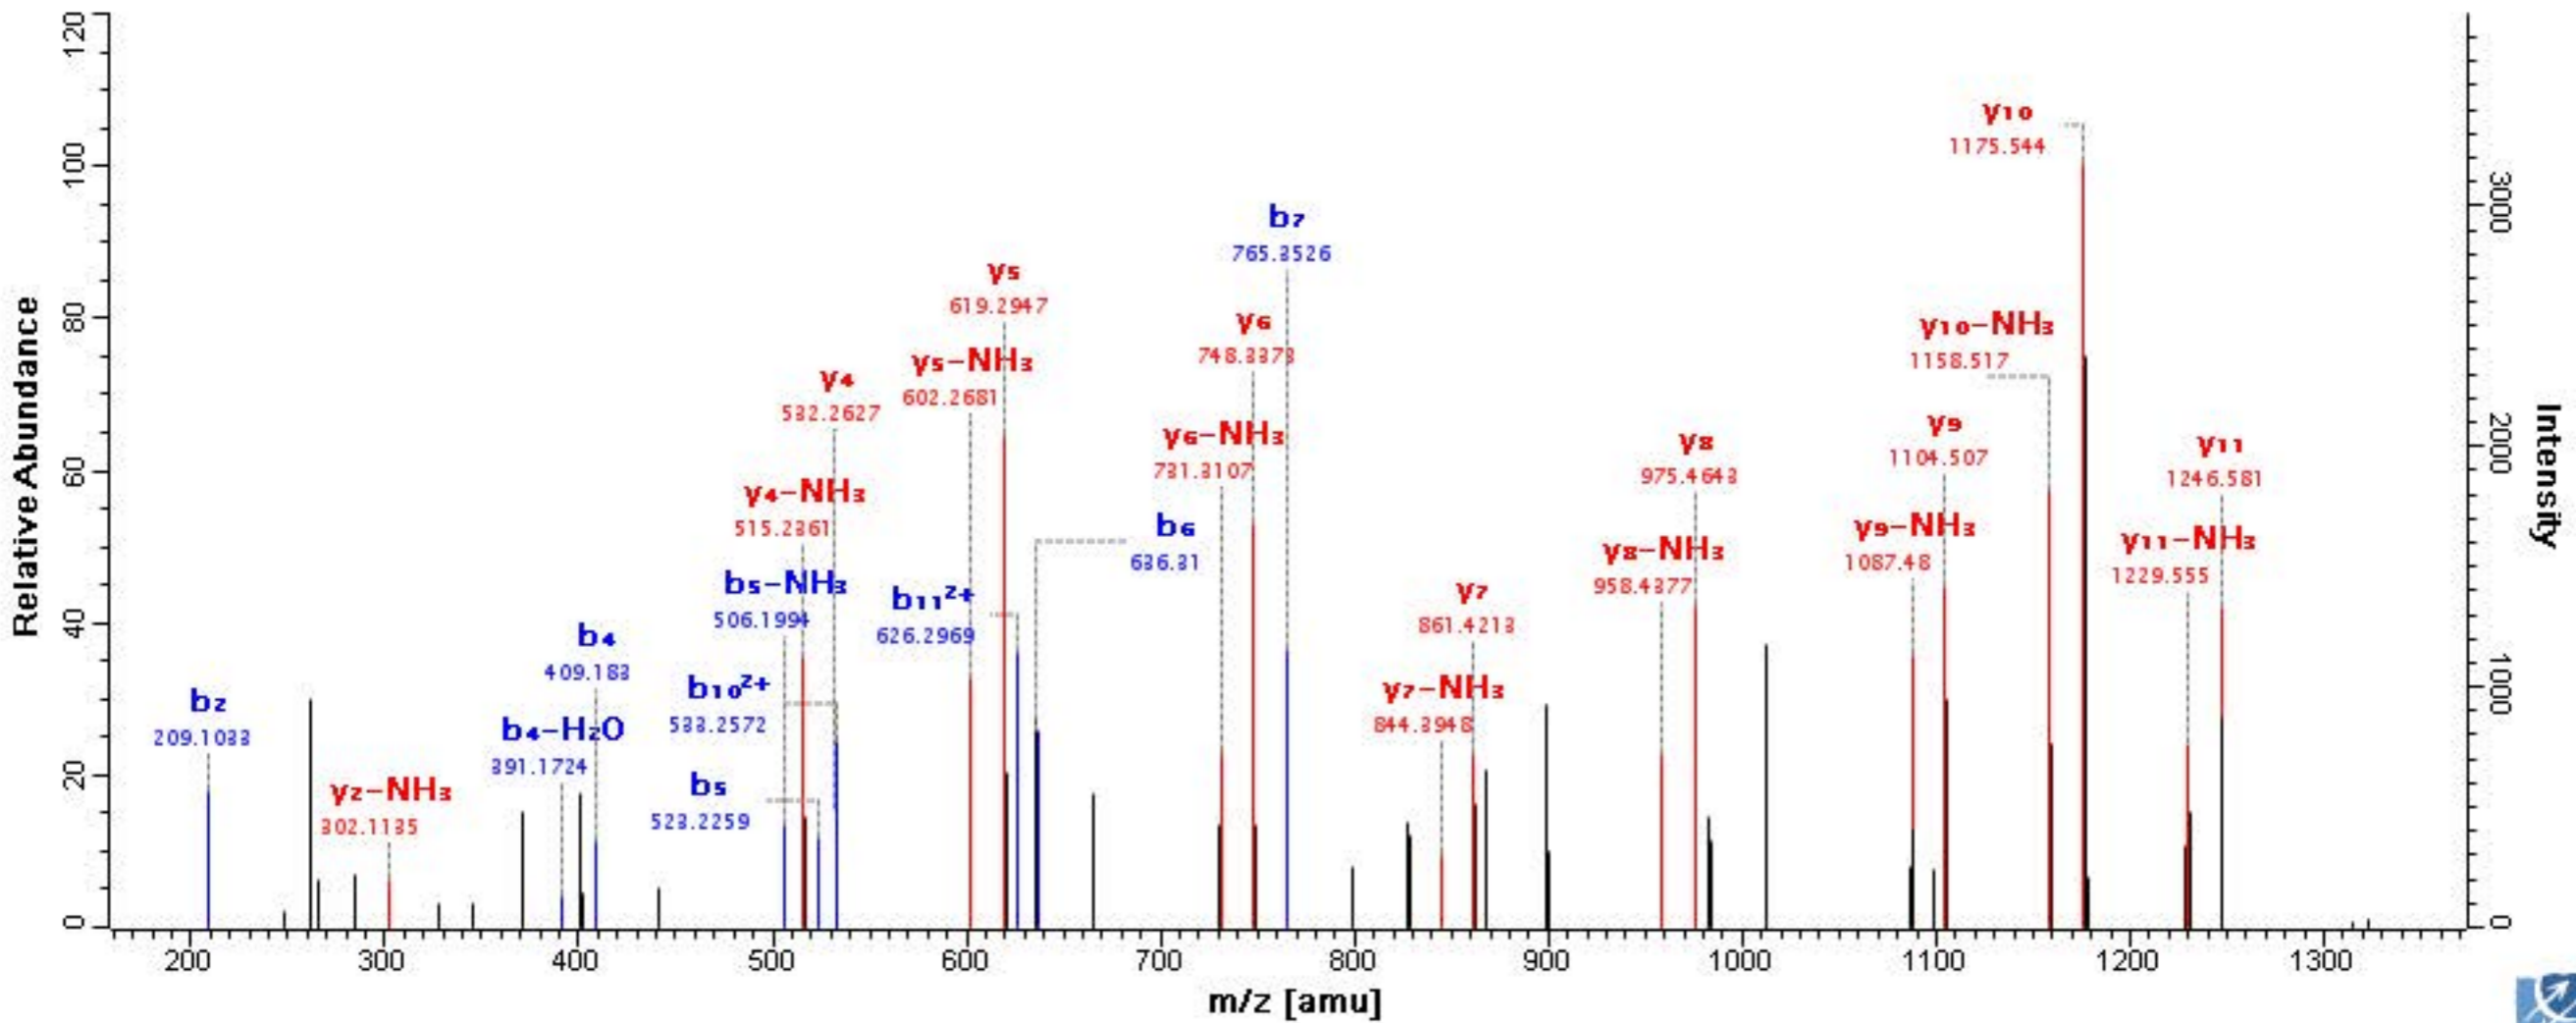

#### precursor information

|                   |                     |
|-------------------|---------------------|
| Mass:             | 1382.63142          |
| m/z:              | System.Collections. |
| Charge:           | System.Collections. |
| Retentiontime:    | System.Collections. |
| Score:            | 173.7086            |
| Mass Error [ppm]: | -0.9419             |
| PEP:              | 2.5694E-09          |
| Precursor Type:   | ISO                 |

#### general information

|                       |             |
|-----------------------|-------------|
| Annotation:           | 10 of 12    |
| AminoAcids Coverag    | 83 %        |
| Intensity Coverage:   | 56 %        |
| Protein Localisation: | 166 ... 177 |

| b <sup>2+</sup> ion |              | b ion      |              |    | seq |          | gamma ion               |  |
|---------------------|--------------|------------|--------------|----|-----|----------|-------------------------|--|
| Δ dalton            | mass         | Δ dalton   | mass         |    |     | Δ dalton | mass                    |  |
|                     | 138.06618833 |            | 138.06618833 | 1  | H   | 11       |                         |  |
|                     | 209.10330212 | -0.0440065 | 209.10330212 | 2  | A   | 10       | 1246.5810899 +0.13058   |  |
|                     | 280.1404159  |            | 280.1404159  | 3  | A   | 9        | 1175.5439761 +0.1257016 |  |
|                     | 409.183009   | -0.0028332 | 409.183009   | 4  | E   | 8        | 1104.5068623 +0.0824931 |  |
|                     | 523.22593645 | +0.2145543 | 523.22593645 | 5  | N   | 7        | 975.46426924 +0.105616  |  |
|                     | 636.31000043 | +0.142209  | 636.31000043 | 6  | I   | 6        | 861.42134179 +0.0893394 |  |
|                     | 765.35259352 | +0.1346501 | 765.35259352 | 7  | E   | 5        | 748.33727781 +0.0423609 |  |
|                     | 852.38462193 |            | 852.38462193 | 8  | S   | 4        | 619.29468472 +0.0133597 |  |
|                     | 909.40608566 |            | 909.40608566 | 9  | G   | 3        | 532.26265631 +0.161416  |  |
| +0.2620505          | 533.25723658 |            | 1065.5071967 | 10 | R   | 2        | 475.24119258            |  |
| +0.2669497          | 626.29689305 |            | 1251.5865096 | 11 | W   | 1        | 319.14008155            |  |
|                     |              |            |              | 12 | N   | 0        | 133.0607686             |  |

Source: 20120521\_VR\_Bsu\_TripleSILACrep1\_L2ESLS\_OG\_F05  
 Scannumber: 19318  
 Protein: BSU27380; yrzB  
 Peptide Score: 158.79  
 Method: ITMS; CID; 3

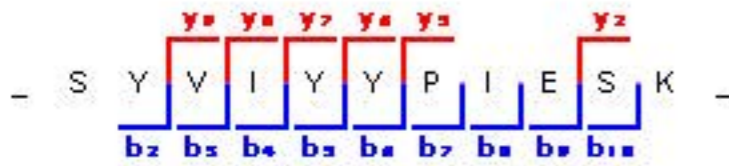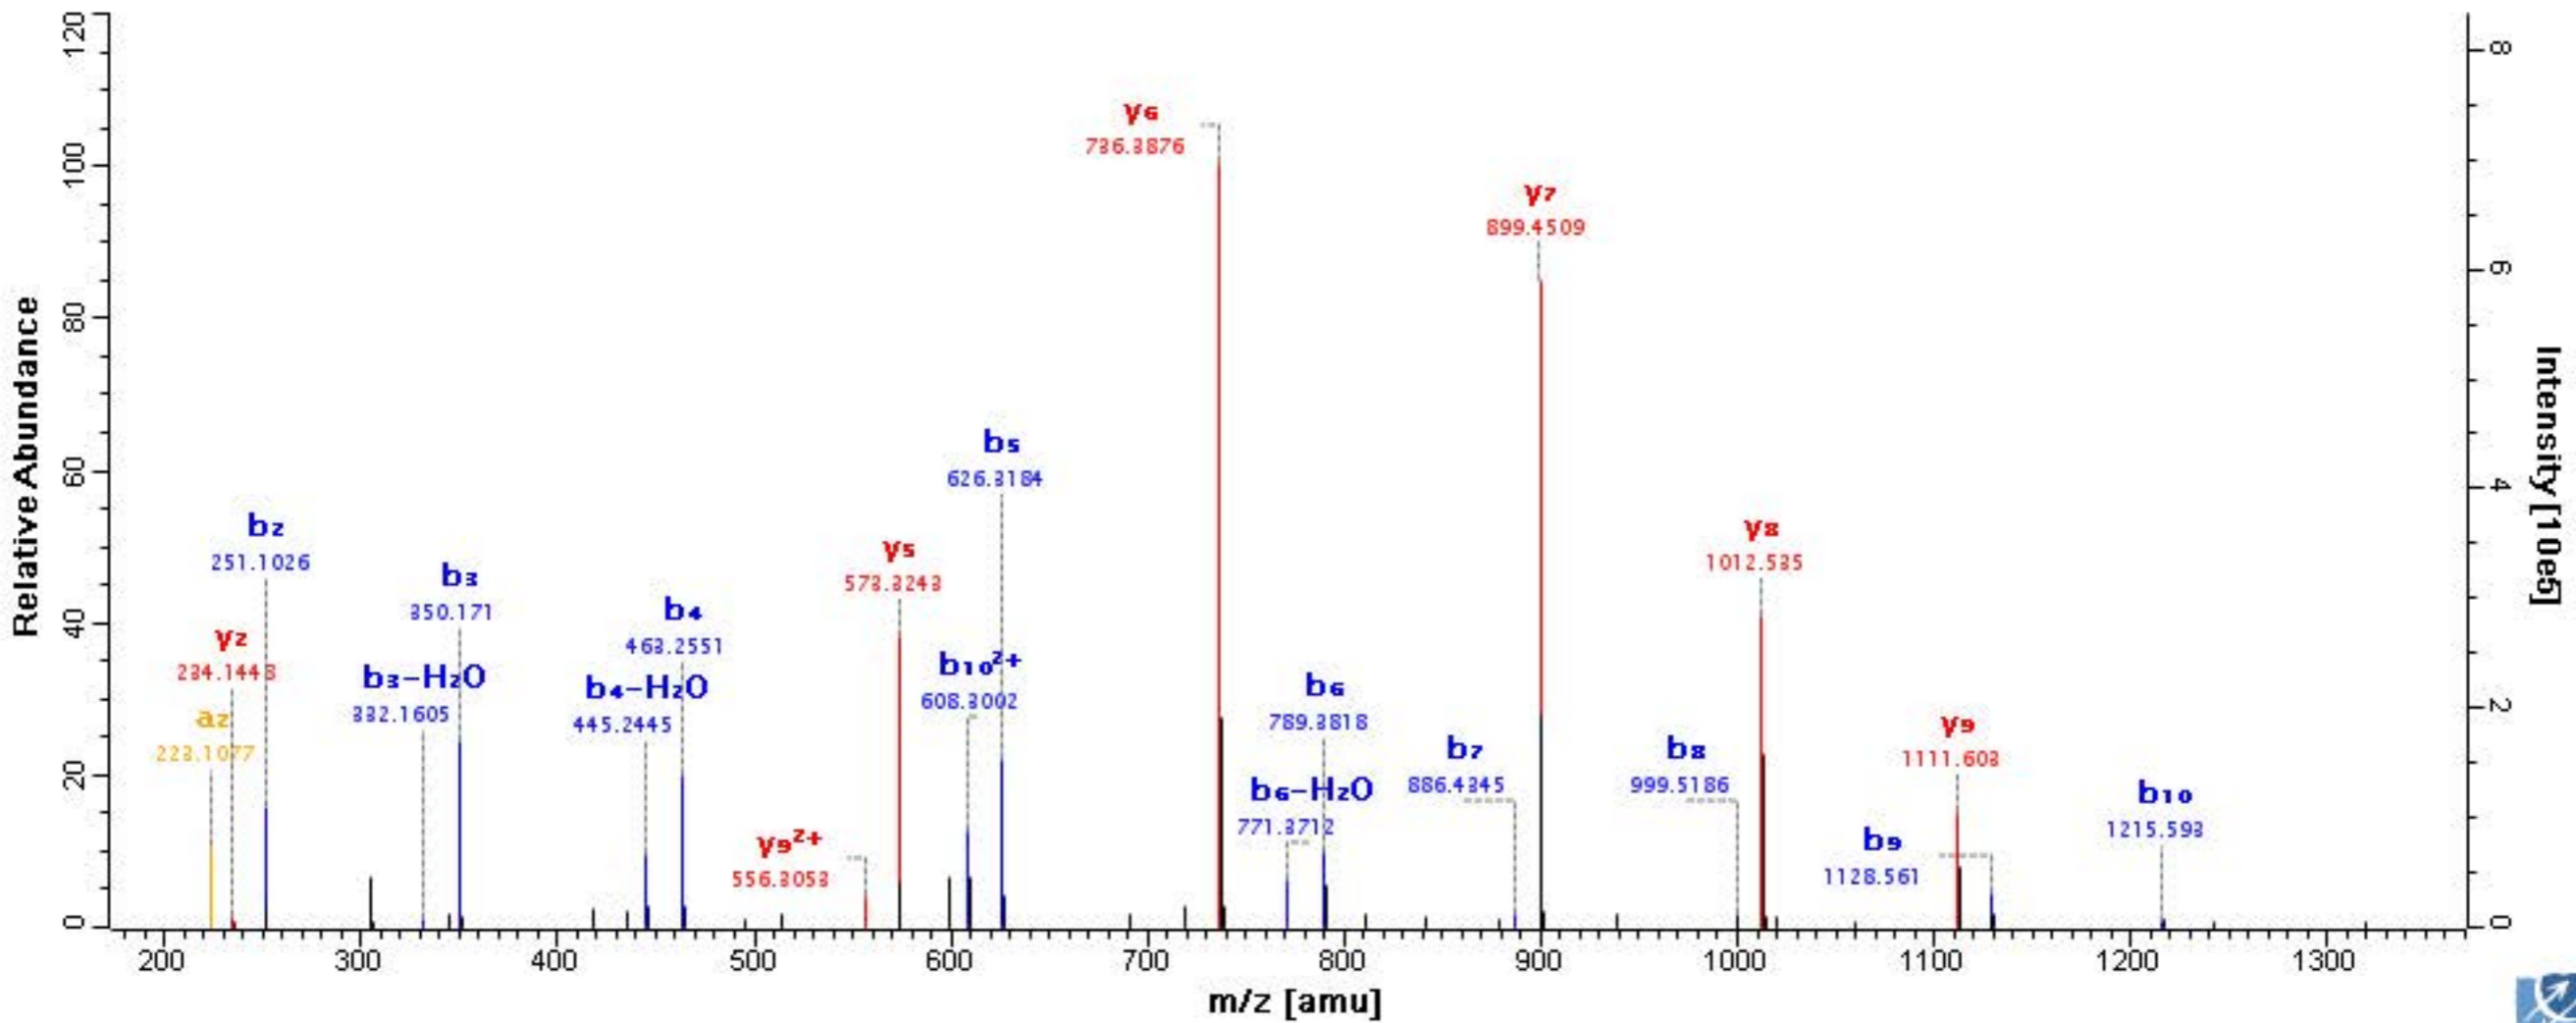

#### precursor information

|                   |                     |
|-------------------|---------------------|
| Mass:             | 1360.69162          |
| m/z:              | System.Collections. |
| Charge:           | System.Collections. |
| Retentiontime:    | System.Collections. |
| Score:            | 158.7898            |
| Mass Error [ppm]: | 0.11035             |
| PEP:              | 3.1064E-12          |
| Precursor Type:   | MULTI               |

#### general information

|                       |           |
|-----------------------|-----------|
| Annotation:           | 9 of 11   |
| AminoAcids Coverage:  | 82 %      |
| Intensity Coverage:   | 72 %      |
| Protein Localisation: | 34 ... 44 |

| a ion    |         | b <sup>2+</sup> ion |         | b ion    |         |    |     |    | y ion    |          | y <sup>2+</sup> ion |          |
|----------|---------|---------------------|---------|----------|---------|----|-----|----|----------|----------|---------------------|----------|
| Δ dalton | mass    | Δ dalton            | mass    | Δ dalton | mass    |    | seq |    | Δ dalton | mass     | Δ dalton            | mass     |
|          | 60.0444 |                     | 88.0393 |          | 88.0393 | 1  | S   | 10 |          |          |                     |          |
| -0.0486  | 223.108 |                     | 251.103 | -0.0543  | 251.103 | 2  | Y   | 9  | 1274.67  |          | 1274.67             |          |
|          | 322.176 |                     | 350.171 | -0.0186  | 350.171 | 3  | V   | 8  | 1111.6   | +0.2594  | 556.305             | +0.10116 |
|          | 435.26  |                     | 463.255 | +0.03163 | 463.255 | 4  | I   | 7  | 1012.53  | +0.08209 | 1012.53             |          |
|          | 598.324 |                     | 626.318 | +0.04026 | 626.318 | 5  | Y   | 6  | 899.451  | +0.03316 | 899.451             |          |
|          | 761.387 |                     | 789.382 | +0.04322 | 789.382 | 6  | Y   | 5  | 736.388  | +0.03686 | 736.388             |          |
|          | 858.44  |                     | 886.435 | +0.23692 | 886.435 | 7  | P   | 4  | 573.324  | +0.06521 | 573.324             |          |
|          | 971.524 |                     | 999.519 | +0.16396 | 999.519 | 8  | I   | 3  | 476.271  |          | 476.271             |          |
|          | 1100.57 |                     | 1128.56 | +0.22519 | 1128.56 | 9  | E   | 2  | 363.187  |          | 363.187             |          |
|          | 1187.6  | +0.06255            | 608.3   | +0.19206 | 6215.59 | 10 | S   | 1  | 234.145  | +0.0499  | 234.145             |          |
|          |         |                     |         |          |         | 11 | K   | 0  | 147.113  |          | 147.113             |          |



Source: 20120521\_VR\_Bsu\_TripleSILACrep1\_L2ESLS\_OG\_F06  
 Scannumber: 11644  
 Protein: BSU05300; ydeQ  
 Peptide Score: 121.6  
 Method: ITMS; CID; 3

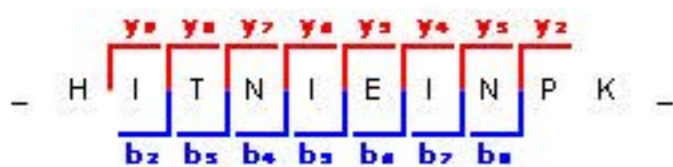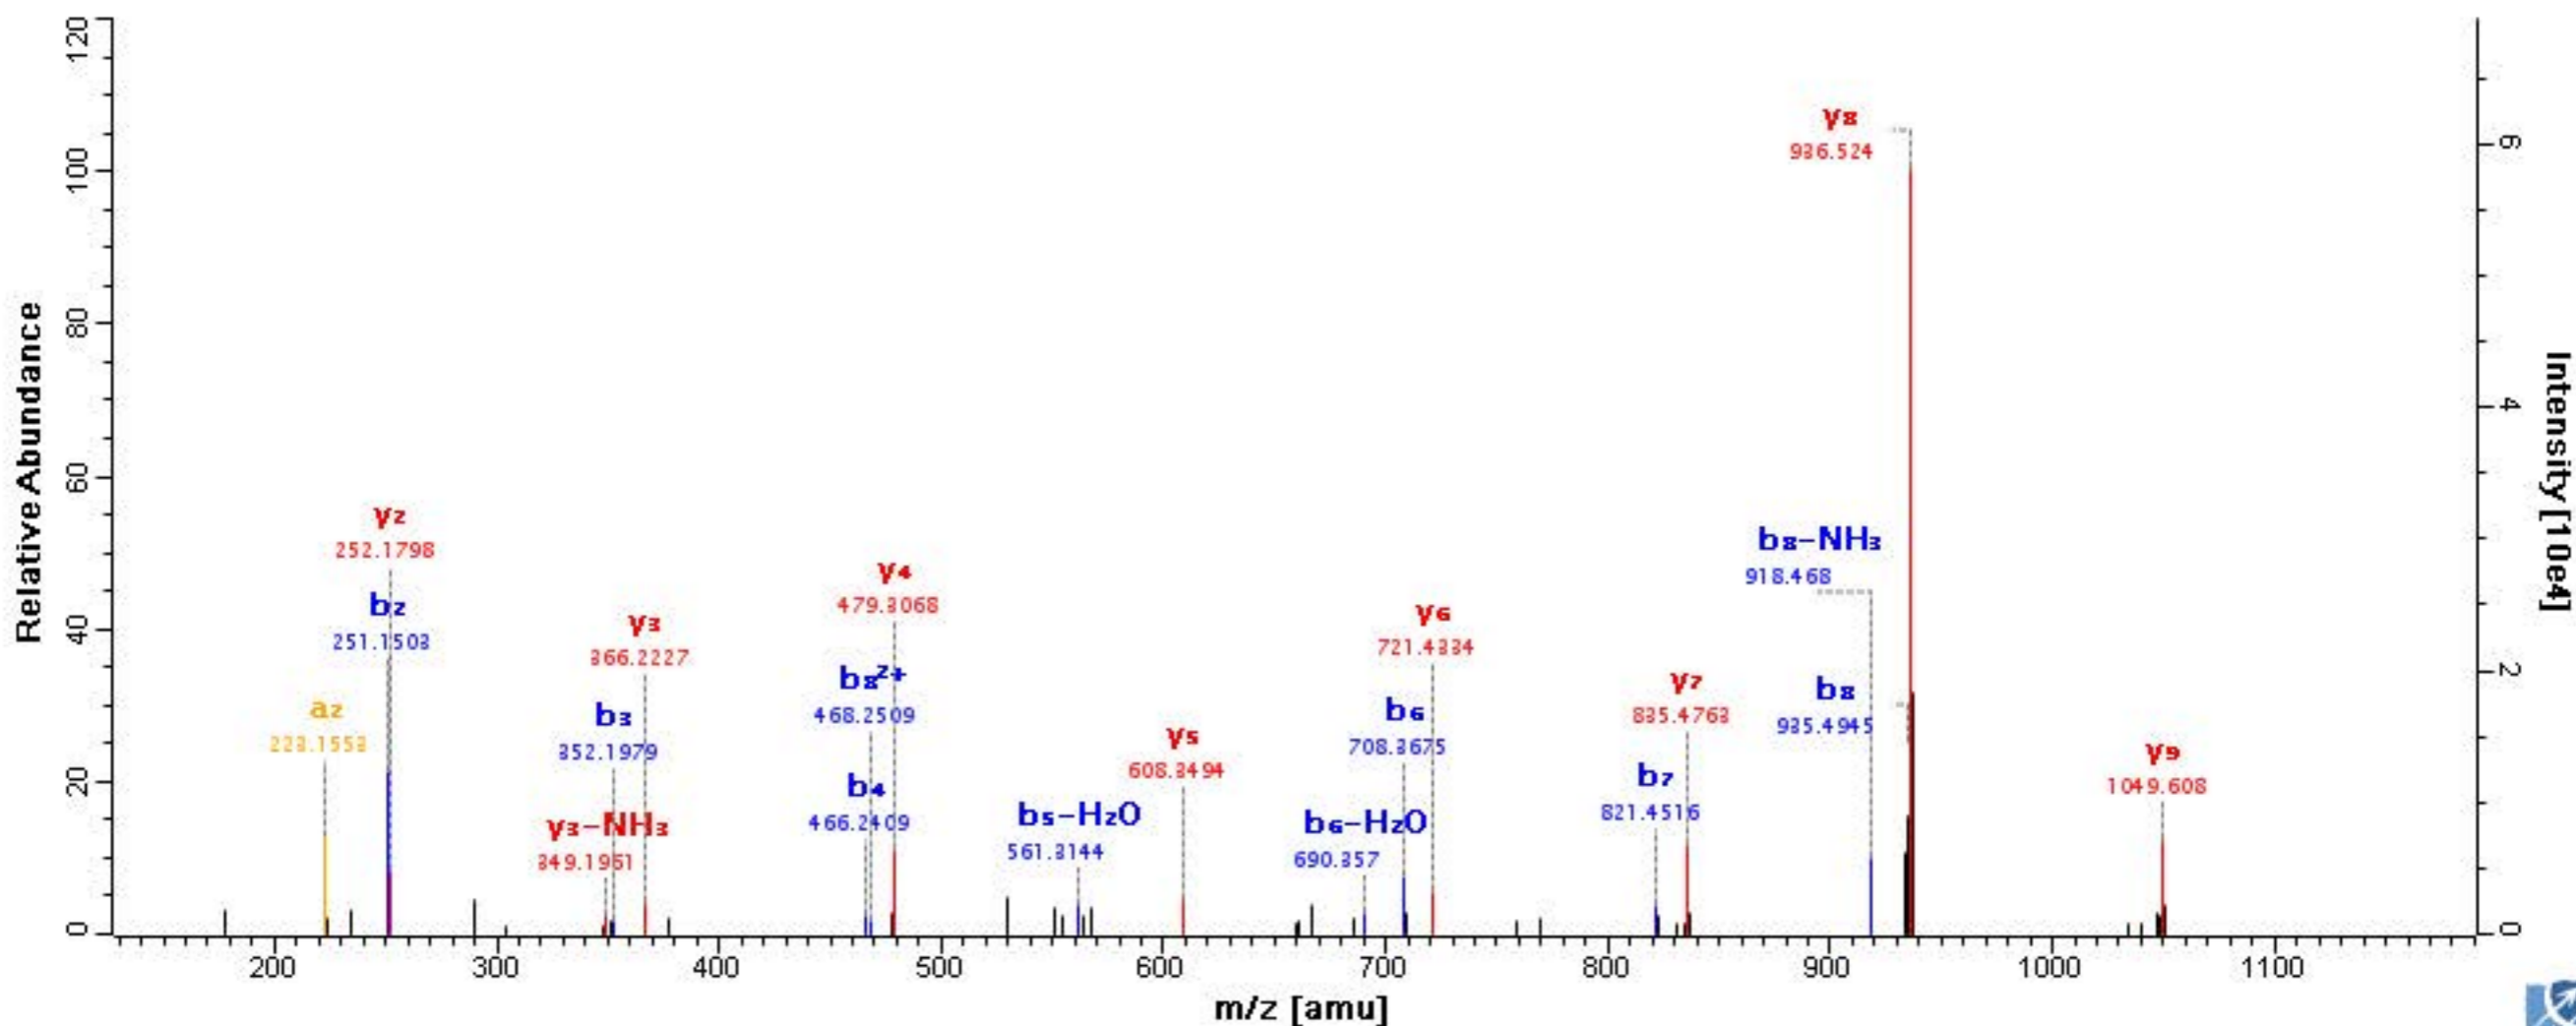

#### precursor information

|                   |                     |
|-------------------|---------------------|
| Mass:             | 1177.64585          |
| m/z:              | System.Collections. |
| Charge:           | System.Collections. |
| Retentiontime:    | System.Collections. |
| Score:            | 121.6033            |
| Mass Error [ppm]: | 0.27917             |
| PEP:              | 0.00050336          |
| Precursor Type:   | MULTI               |

#### general information

|                       |             |
|-----------------------|-------------|
| Annotation:           | 8 of 10     |
| AminoAcids Coverage:  | 80 %        |
| Intensity Coverage:   | 66 %        |
| Protein Localisation: | 172 ... 181 |

| a ion     |          | b <sup>2+</sup> ion |          | b ion     |          | y ion |          |           |
|-----------|----------|---------------------|----------|-----------|----------|-------|----------|-----------|
| Δ dalton  | mass     | Δ dalton            | mass     | Δ dalton  | mass     | seq   | Δ dalton | mass      |
|           | 110.0713 |                     | 138.0662 |           | 138.0662 | 1     |          |           |
| -0.159183 | 223.1553 |                     | 251.1503 | -0.089934 | 251.1503 | 2     | 1049.608 | +0.112618 |
|           | 324.203  |                     | 352.1979 | -0.054803 | 352.1979 | 3     | 936.524  | +0.03561  |
|           | 438.2459 |                     | 466.2409 | +0.11931  | 466.2409 | 4     | 835.4763 | -0.025842 |
|           | 551.33   |                     | 579.3249 |           | 579.3249 | 5     | 721.4334 | +0.085383 |
|           | 680.3726 |                     | 708.3675 | -0.062462 | 708.3675 | 6     | 608.3494 | +0.091017 |
|           | 793.4567 |                     | 821.4516 | +0.108723 | 821.4516 | 7     | 479.3068 | -0.048824 |
|           | 907.4996 | +0.148645           | 468.2509 | +0.032776 | 935.4945 | 8     | 366.2227 | -0.047706 |
|           | 1004.552 |                     | 1032.547 |           | 1032.547 | 9     | 252.1798 | -0.164371 |
|           |          |                     |          |           |          | 10    | 155.127  |           |

Source: 20120521\_VR\_Bsu\_TripleSILACrep1\_L2ESLS\_OG\_F06  
 Scannumber: 13908  
 Protein: BSU33980; yvbT  
 Peptide Score: 130.22  
 Method: ITMS; CID; 3

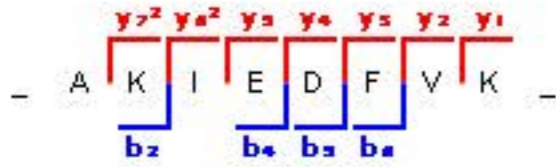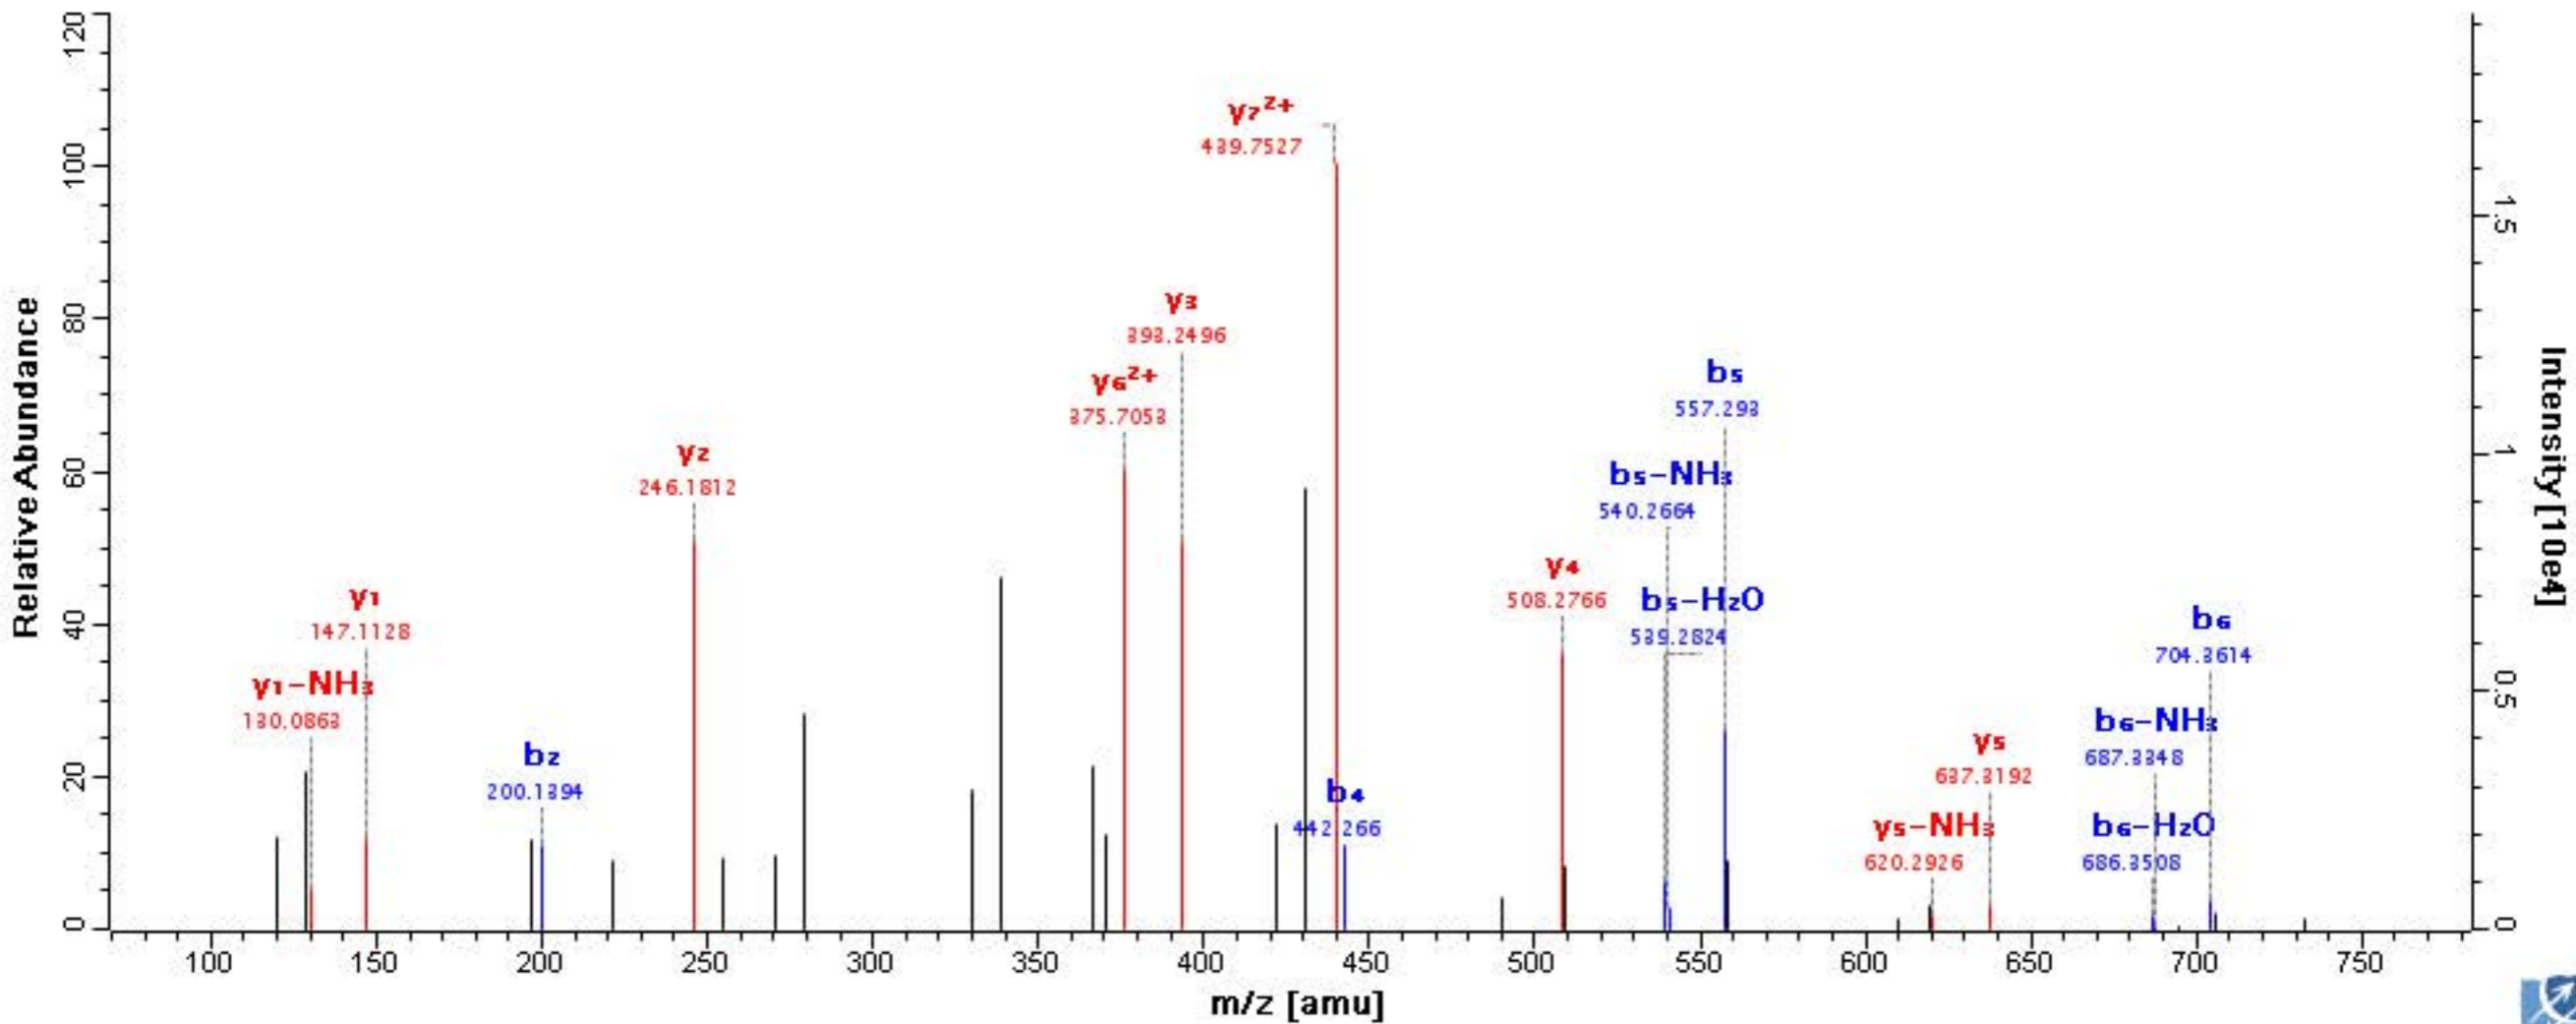

**precursor information**

|                       |                     |
|-----------------------|---------------------|
| Mass:                 | 948.52747           |
| m/z:                  | System.Collections. |
| Charge:               | System.Collections. |
| Retentiontime:        | System.Collections. |
| Score:                | 130.2208            |
| Mass Error [ppm]:     | -0.592              |
| g PEP:                | 0.0019271           |
| Annotation:           | 7 of 8              |
| AminoAcids Coverage:  | 88 %                |
| Intensity Coverage:   | 56 %                |
| Protein Localisation: | 296 ... 303         |

| b ion      |              |   |     |   | γ ion        |            | γ <sup>2+</sup> ion |            |
|------------|--------------|---|-----|---|--------------|------------|---------------------|------------|
| Δ dalton   | mass         |   | seq |   | Δ dalton     | mass       | Δ dalton            | mass       |
|            | 72.044390254 | 1 | A   | 7 |              |            |                     |            |
| +0.1206565 | 200.13935327 | 2 | K   | 6 | 878.49819513 |            | 439.7527358         | +0.2661851 |
|            | 313.22341725 | 3 | I   | 5 | 750.40323211 |            | 375.70525429        | +0.1926339 |
| +0.0546073 | 442.26601035 | 4 | E   | 4 | 637.31916813 | +0.2667694 | 637.31916813        |            |
| +0.0804597 | 557.29295338 | 5 | D   | 3 | 508.27657504 | +0.0884762 | 508.27657504        |            |
| +0.1331395 | 704.3613673  | 6 | F   | 2 | 393.249632   | +0.0612811 | 393.249632          |            |
|            | 803.42978121 | 7 | V   | 1 | 246.18121809 | +0.0067855 | 246.18121809        |            |
|            |              | 8 | K   | 0 | 147.11280417 | -0.0336111 | 147.11280417        |            |

Source: 20120521\_VR\_Bsu\_TripleSILACrep1\_L2ESLS\_OG\_F06  
 Scannumber: 20043  
 Protein: BSU17360; ymzA  
 Peptide Score: 149.23  
 Method: ITMS; CID; 3

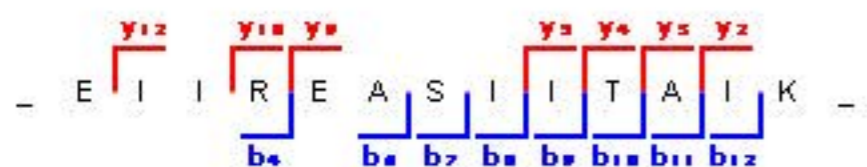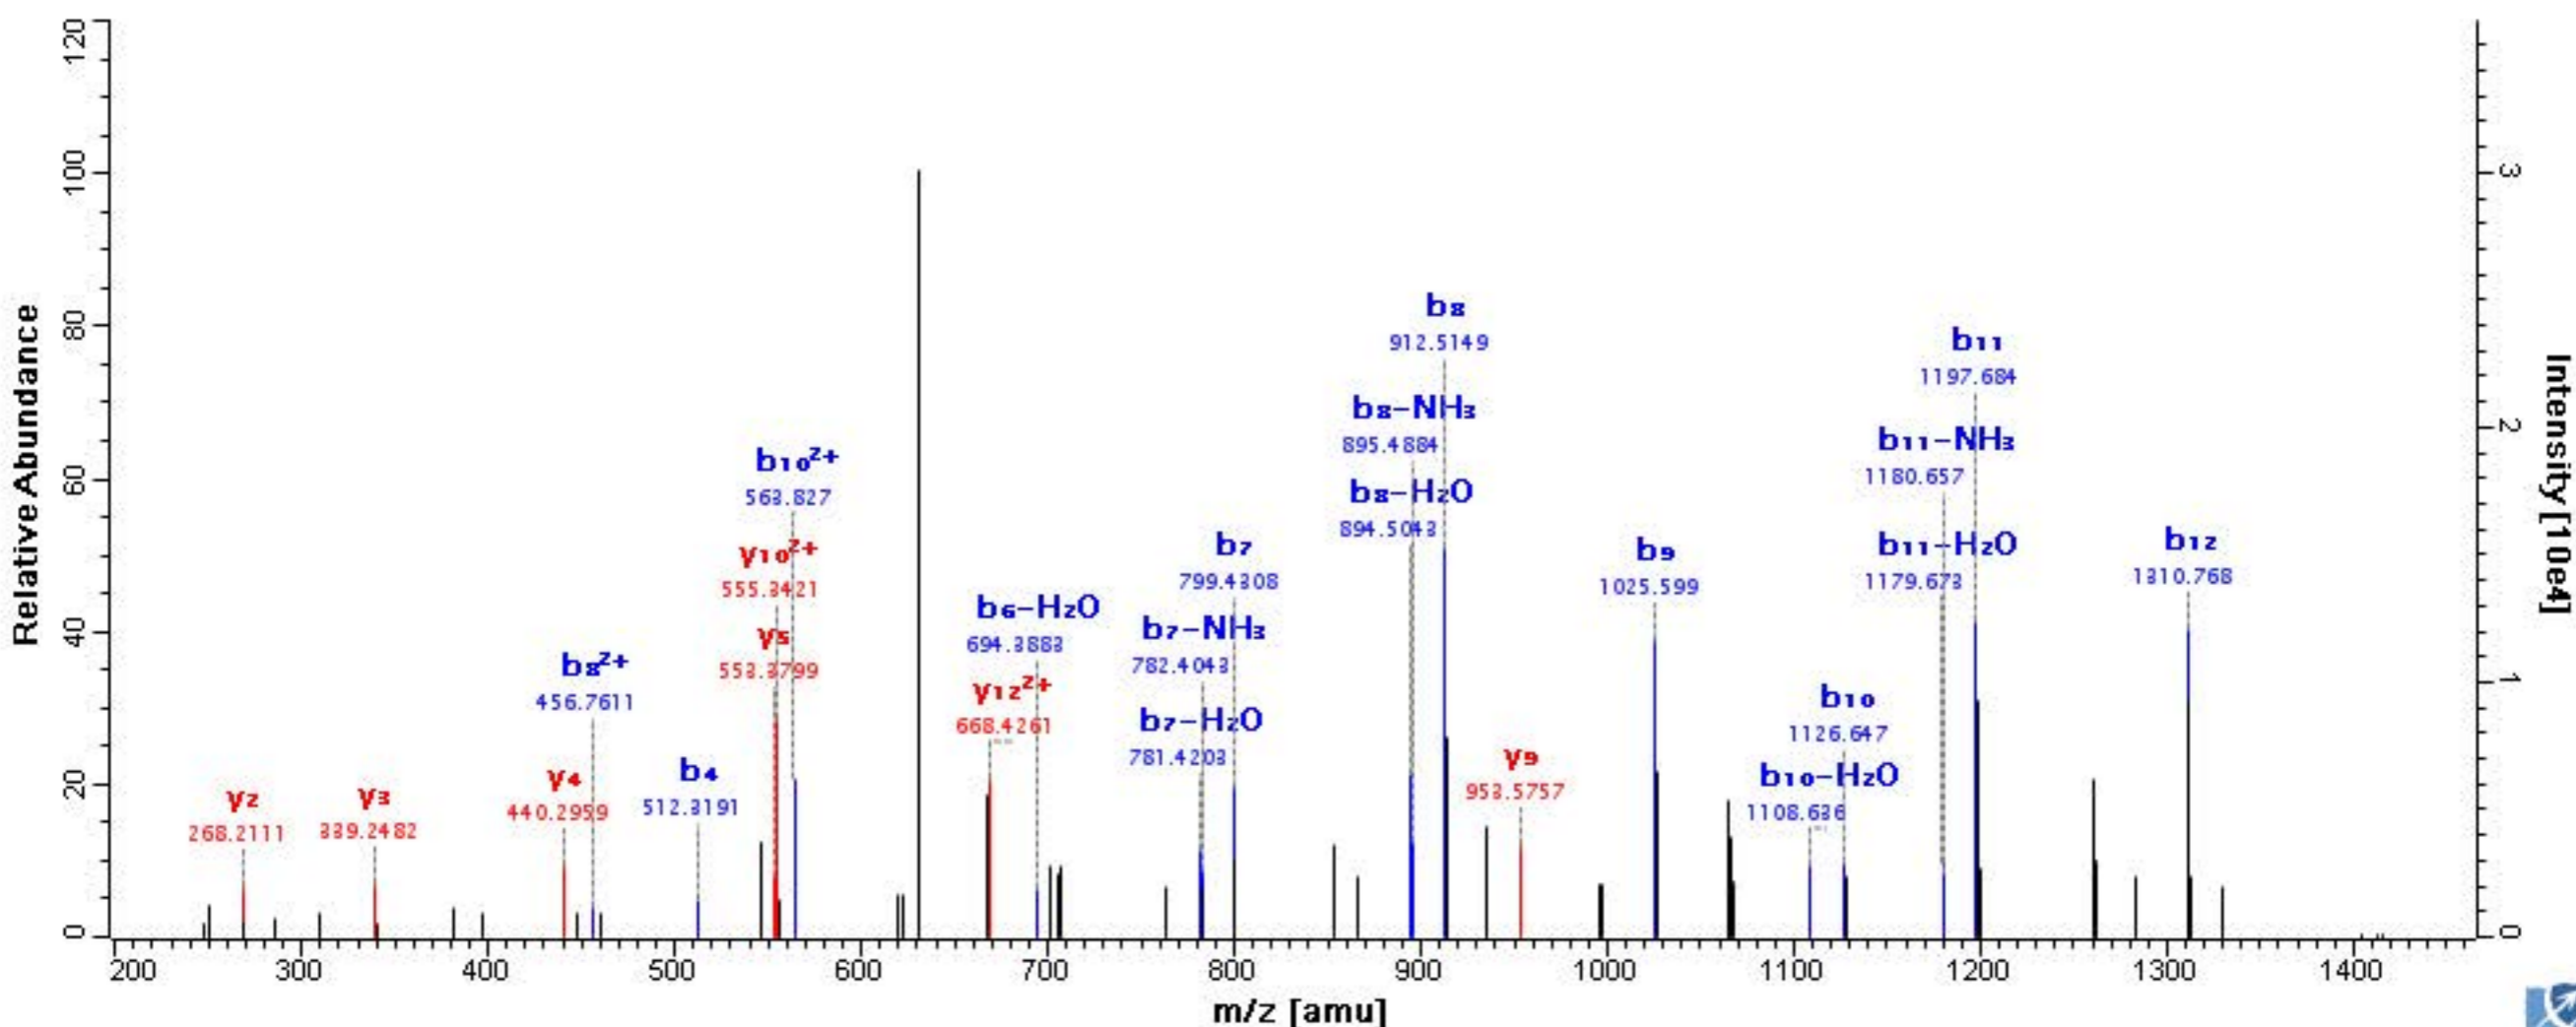

#### precursor information

|                   |                     |
|-------------------|---------------------|
| Mass:             | 1455.86698          |
| m/z:              | System.Collections. |
| Charge:           | System.Collections. |
| Retentiontime:    | System.Collections. |
| Score:            | 149.2254            |
| Mass Error [ppm]: | 0.61272             |
| PEP:              | 7.6456E-12          |
| Precursor Type:   | MULTI               |

#### general information

|                       |           |
|-----------------------|-----------|
| Annotation:           | 10 of 13  |
| AminoAcids Coverag    | 77 %      |
| Intensity Coverage:   | 45 %      |
| Protein Localisation: | 32 ... 44 |

| b <sup>2+</sup> ion |          | b ion     |          |     | y ion |          | y <sup>2+</sup> ion |          |           |
|---------------------|----------|-----------|----------|-----|-------|----------|---------------------|----------|-----------|
| Δ dalton            | mass     | Δ dalton  | mass     | seq |       | Δ dalton | mass                | Δ dalton | mass      |
|                     | 130.0499 |           | 130.0499 | 1   | E     | 12       |                     |          |           |
|                     | 243.1339 |           | 243.1339 | 2   | I     | 11       | 1335.845            | 668.4261 | +0.070768 |
|                     | 356.218  |           | 356.218  | 3   | I     | 10       | 1222.761            | 1222.761 |           |
|                     | 512.3191 | -0.044694 | 512.3191 | 4   | R     | 9        | 1109.677            | 555.3421 | -0.361098 |
|                     | 641.3617 |           | 641.3617 | 5   | E     | 8        | 953.5757            | 953.5757 | +0.019798 |
|                     | 712.3988 |           | 712.3988 | 6   | A     | 7        | 824.5331            | 824.5331 |           |
|                     | 799.4308 | +0.05286  | 799.4308 | 7   | S     | 6        | 753.496             | 753.496  |           |
| +0.030168           | 456.7611 | +0.043015 | 912.5149 | 8   | I     | 5        | 666.464             | 666.464  |           |
|                     | 1025.599 | +0.048855 | 1025.599 | 9   | I     | 4        | 553.3799            | 553.3799 | +0.099691 |
| +0.116945           | 563.827  | +0.049028 | 1126.647 | 10  | T     | 3        | 440.2959            | 440.2959 | +0.136575 |
|                     | 1197.684 | +0.045606 | 1197.684 | 11  | A     | 2        | 339.2482            | 339.2482 | -0.016552 |
|                     | 1310.768 | +0.077387 | 1310.768 | 12  | I     | 1        | 268.2111            | 268.2111 | -0.083198 |
|                     |          |           |          | 13  | K     | 0        | 155.127             | 155.127  |           |

Source: 20120521\_VR\_Bsu\_TripleSILACrep1\_L2ESLS\_OG\_F06  
 Scannumber: 21988  
 Protein: BSU40010; S14D; yxaD  
 Peptide Score: 97.55  
 Method: ITMS; CID; 3

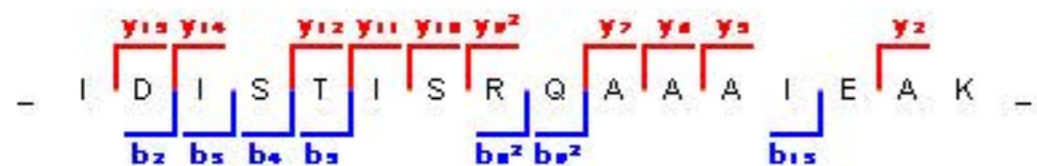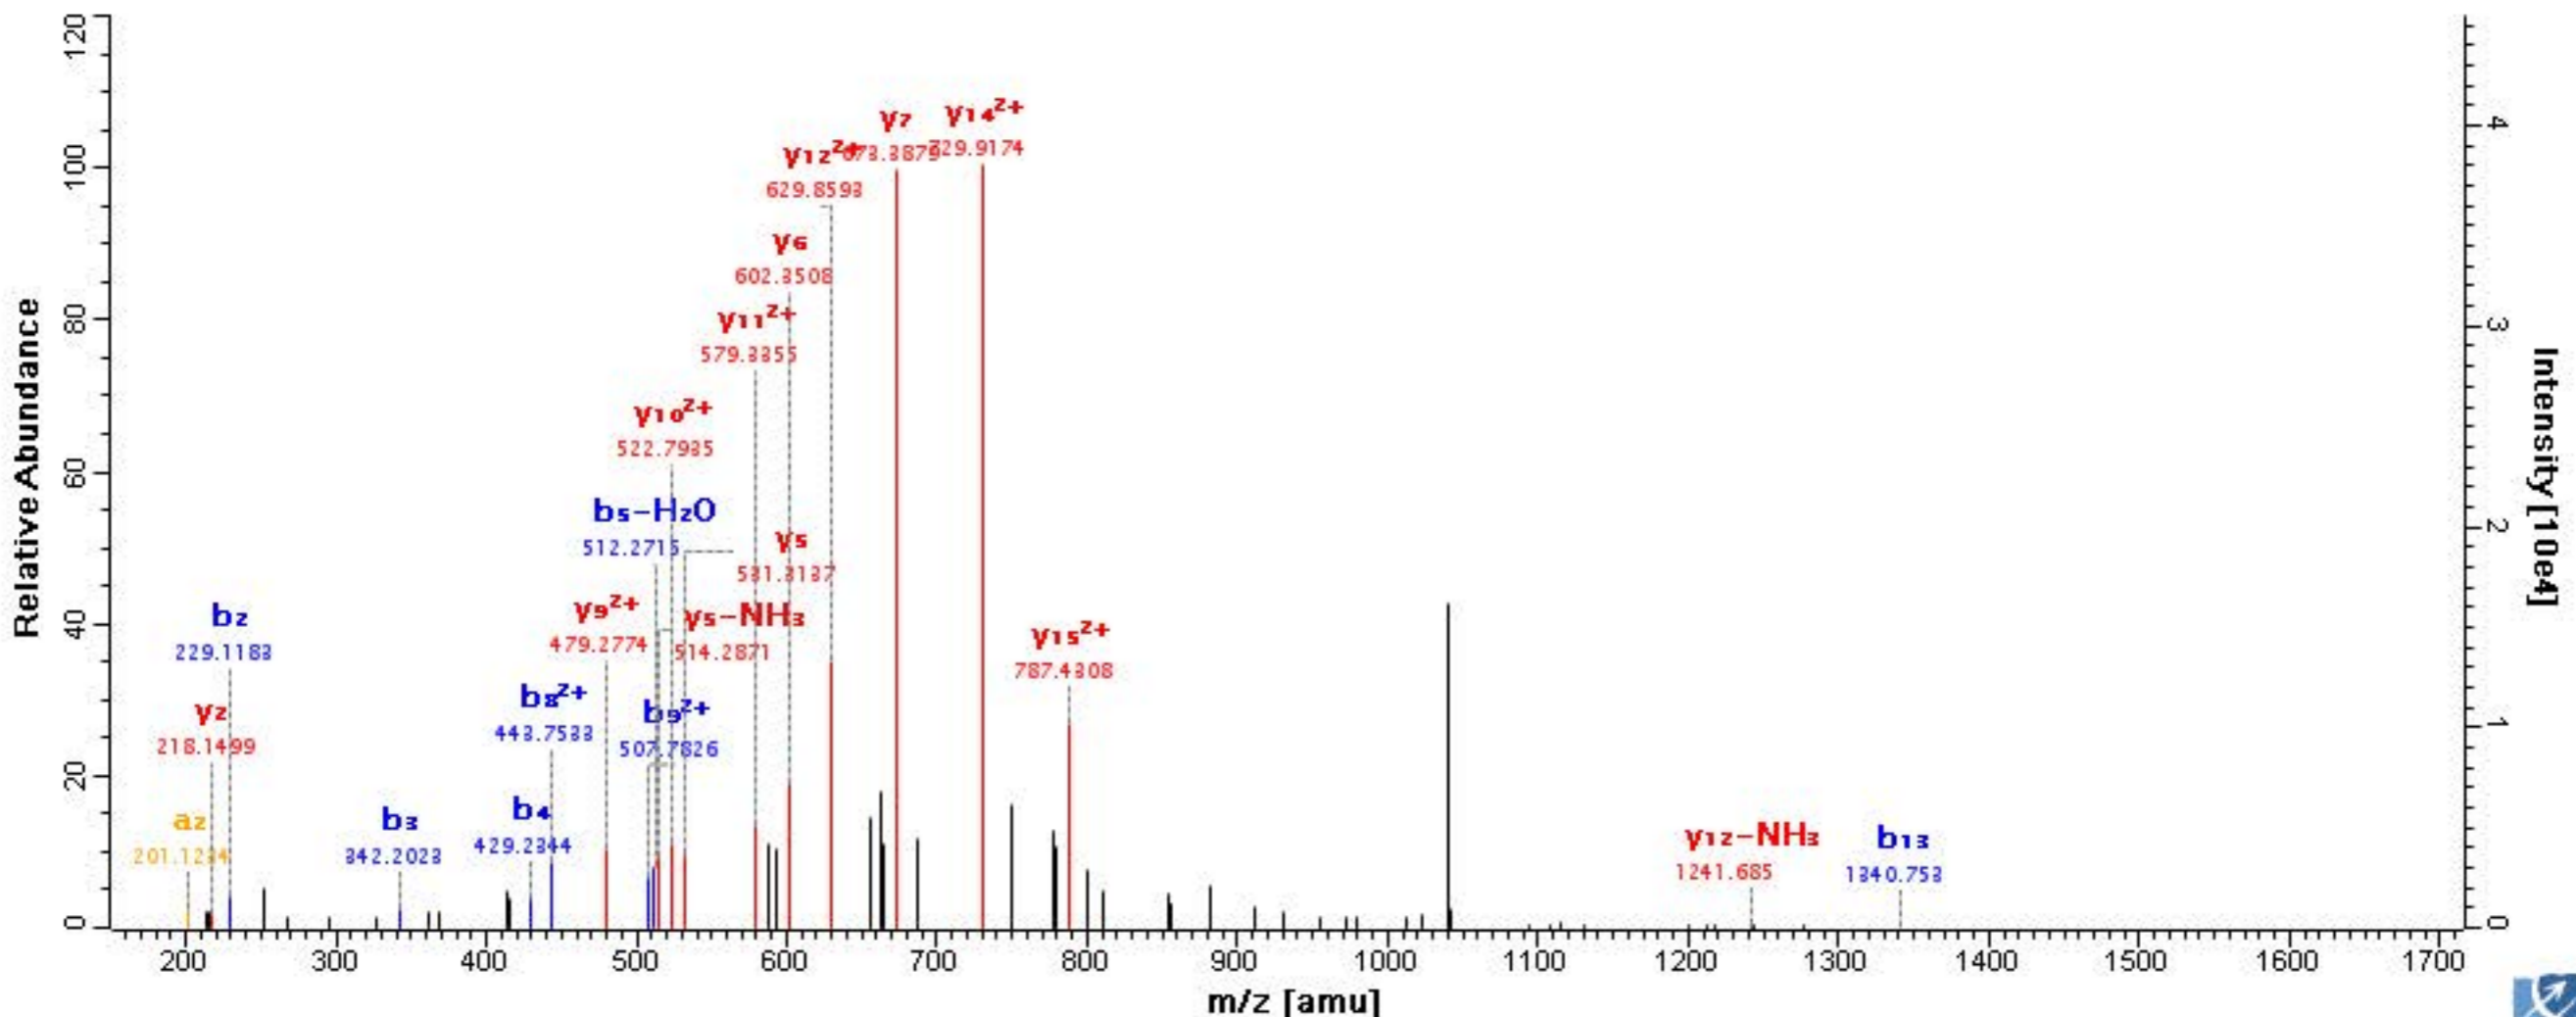

**precursor information**

|                   |                     |
|-------------------|---------------------|
| Mass:             | 1685.93304          |
| m/z:              | System.Collections. |
| Charge:           | System.Collections. |
| Retentiontime:    | System.Collections. |
| Score:            | 97.55133            |
| Mass Error [ppm]: | 1.0924              |
| PEP:              | 6.4832E-07          |
| Precursor Type:   | MULTI               |

| a ion    |         | b <sup>2+</sup> ion |         | b ion    |         |    |     |    | y ion    |          | y <sup>2+</sup> ion |         |
|----------|---------|---------------------|---------|----------|---------|----|-----|----|----------|----------|---------------------|---------|
| Δ dalton | mass    | Δ dalton            | mass    | Δ dalton | mass    |    | seq |    | Δ dalton | mass     | Δ dalton            | mass    |
|          | 86.0964 |                     | 114.091 |          | 114.091 | 1  | I   | 15 |          |          |                     |         |
| +0.08569 | 201.123 |                     | 229.118 | +0.03394 | 229.118 | 2  | D   | 14 | 1573.85  |          | 787.431             | +0.4006 |
|          | 314.207 |                     | 342.202 | -0.0252  | 342.202 | 3  | I   | 13 | 1458.83  |          | 729.917             | +0.2207 |
|          | 401.239 |                     | 429.234 | +0.2293  | 429.234 | 4  | S   | 12 | 1345.74  |          | 1345.74             |         |
|          | 502.287 |                     | 530.282 |          | 530.282 | 5  | T   | 11 | 1258.71  |          | 629.859             | +0.2176 |
|          | 615.371 |                     | 643.366 |          | 643.366 | 6  | I   | 10 | 1157.66  |          | 579.335             | +0.4040 |
|          | 702.403 |                     | 730.398 |          | 730.398 | 7  | S   | 9  | 1044.58  |          | 522.793             | +0.0482 |
|          | 858.504 | -0.4735             | 443.753 |          | 886.499 | 8  | R   | 8  | 957.548  |          | 479.277             | +0.0116 |
|          | 986.563 | +0.00858            | 507.783 |          | 1014.56 | 9  | Q   | 7  | 801.446  |          | 801.446             |         |
|          | 1057.6  |                     | 1085.59 |          | 1085.59 | 10 | A   | 6  | 673.388  | +0.21737 | 673.388             |         |
|          | 1128.64 |                     | 1156.63 |          | 1156.63 | 11 | A   | 5  | 602.351  | +0.0485  | 602.351             |         |
|          | 1199.67 |                     | 1227.67 |          | 1227.67 | 12 | A   | 4  | 531.314  | +0.0067  | 531.314             |         |
|          | 1312.76 |                     | 1340.75 | -0.1122  | 1340.75 | 13 | I   | 3  | 460.277  |          | 460.277             |         |
|          | 1441.8  |                     | 1469.8  |          | 1469.8  | 14 | E   | 2  | 347.193  |          | 347.193             |         |
|          | 1512.84 |                     | 1540.83 |          | 1540.83 | 15 | A   | 1  | 218.15   | -0.0037  | 218.15              |         |
|          |         |                     |         |          |         | 16 | K   | 0  | 147.113  |          | 147.113             |         |

**general information**

|                       |           |
|-----------------------|-----------|
| Annotation:           | 13 of 16  |
| AminoAcids Coverage:  | 81 %      |
| Intensity Coverage:   | 60 %      |
| Protein Localisation: | 62 ... 77 |

Source: 20120521\_VR\_Bsu\_TriplesILACrep1\_L2ESLS\_OG\_F06  
 Scannumber: 23303  
 Protein: BSU40490; yycA  
 Peptide Score: 59.59  
 Method: ITMS; CID; 3

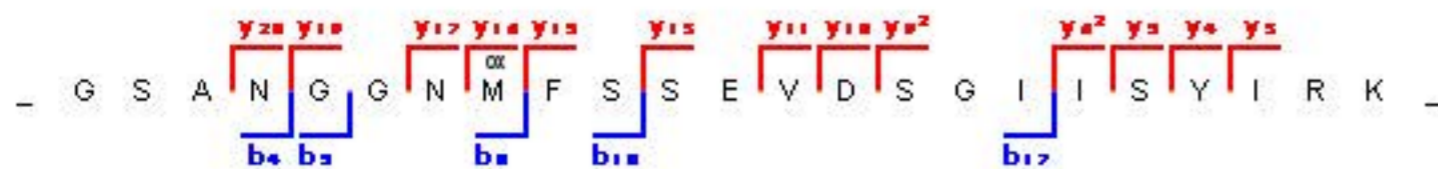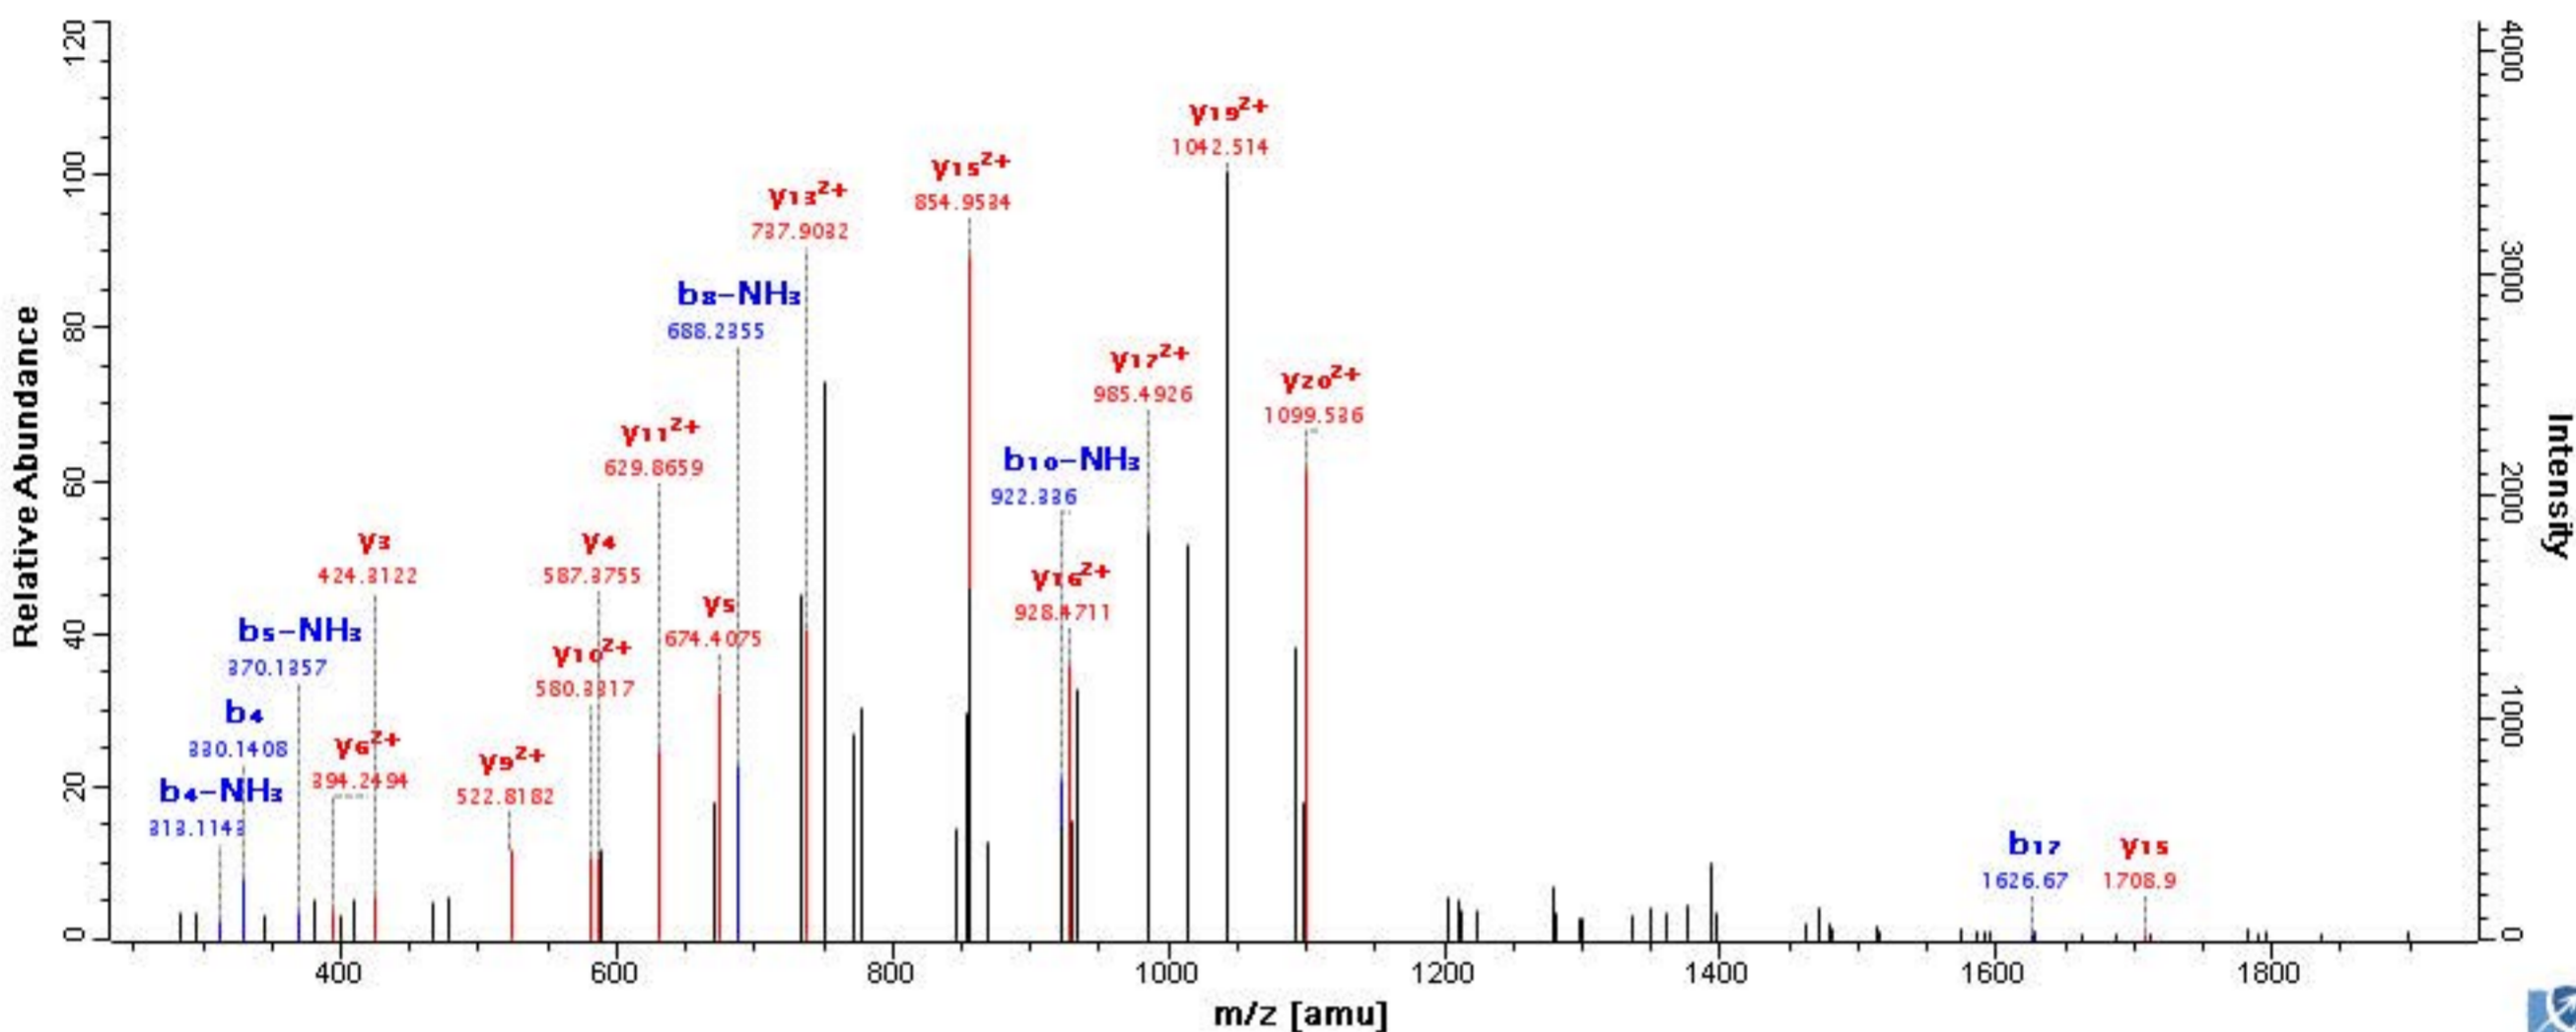

#### precursor information

|                   |                     |
|-------------------|---------------------|
| Mass:             | 2404.13219          |
| m/z:              | System.Collections. |
| Charge:           | System.Collections. |
| Retentiontime:    | System.Collections. |
| Score:            | 59.58521            |
| Mass Error [ppm]: | -0.29085            |
| PEP:              | 0.00011328          |
| Precursor Type:   | MULTI               |

| b ion      |              |    |     |    | γ ion        |            | γ <sup>2+</sup> ion |            |
|------------|--------------|----|-----|----|--------------|------------|---------------------|------------|
| Δ dalton   | mass         |    | seq |    | Δ dalton     | mass       | Δ dalton            | mass       |
|            | 58.02874019  | 1  | G   | 22 |              |            |                     |            |
|            | 145.0607686  | 2  | S   | 21 | 2356.1328996 |            | 2356.1328996        |            |
|            | 216.09788239 | 3  | A   | 20 | 2269.1008712 |            | 2269.1008712        |            |
| +0.1305525 | 330.14080984 | 4  | N   | 19 | 2198.0637574 |            | 1099.5355169        | +0.4672907 |
|            | 387.16227356 | 5  | G   | 18 | 2084.0208299 |            | 1042.5140532        | +0.2094575 |
|            | 444.18373728 | 6  | G   | 17 | 2026.9993662 |            | 2026.9993662        |            |
|            | 558.22666473 | 7  | N   | 16 | 1969.9779025 |            | 985.49258948        | -0.0452018 |
|            | 705.26206396 | 8  | M   | 15 | 1855.934975  |            | 928.47112576        | +0.0639695 |
|            | 852.33047787 | 9  | F   | 14 | 1708.8995758 | +0.1575531 | 854.95342614        | +0.1630289 |
|            | 939.36250628 | 10 | S   | 13 | 1561.8311619 |            | 1561.8311619        |            |
|            | 1026.3945347 | 11 | S   | 12 | 1474.7991335 |            | 737.90320498        | +0.348443  |
|            | 1155.4371278 | 12 | E   | 11 | 1387.7671051 |            | 1387.7671051        |            |
|            | 1254.5055417 | 13 | V   | 10 | 1258.724512  |            | 629.86589422        | +0.3176385 |
|            | 1369.5324847 | 14 | D   | 9  | 1159.6560981 |            | 580.33168727        | +0.366738  |
|            | 1456.5645131 | 15 | S   | 8  | 1044.629155  |            | 522.81821575        | +0.3195406 |
|            | 1513.5859769 | 16 | G   | 7  | 957.59712662 |            | 957.59712662        |            |
| +0.3984406 | 1626.6700409 | 17 | I   | 6  | 900.5756629  |            | 900.5756629         |            |
|            | 1739.7541048 | 18 | I   | 5  | 787.49159892 |            | 394.24943769        | +0.2642342 |
|            | 1826.7861332 | 19 | S   | 4  | 674.40753494 | +0.1490446 | 674.40753494        |            |
|            | 1989.8494618 | 20 | Y   | 3  | 587.37550653 | +0.0113343 | 587.37550653        |            |
|            | 2102.9335258 | 21 | I   | 2  | 424.31217799 | +0.1223923 | 424.31217799        |            |
|            | 2259.0346368 | 22 | R   | 1  | 311.22811401 |            | 311.22811401        |            |
|            |              | 23 | K   | 0  | 155.12700298 |            | 155.12700298        |            |

#### general information

|                       |             |
|-----------------------|-------------|
| Annotation:           | 15 of 23    |
| AminoAcids Coverag    | 65 %        |
| Intensity Coverage:   | 36 %        |
| Protein Localisation: | 548 ... 570 |

Source: 201 20521\_VR\_Bsu\_TripleSILACrep1\_L2ESLS\_OG\_F06  
 Scannumber: 24865  
 Protein: BSU30070; opuD; ytfQ  
 Peptide Score: 153.09  
 Method: ITMS; CID; 3

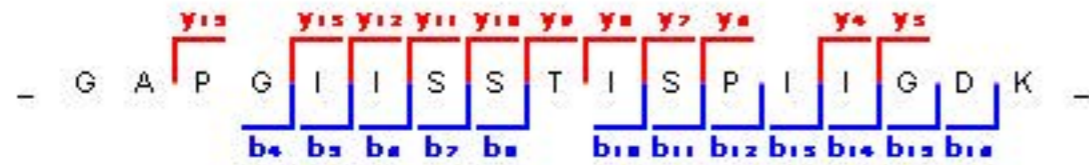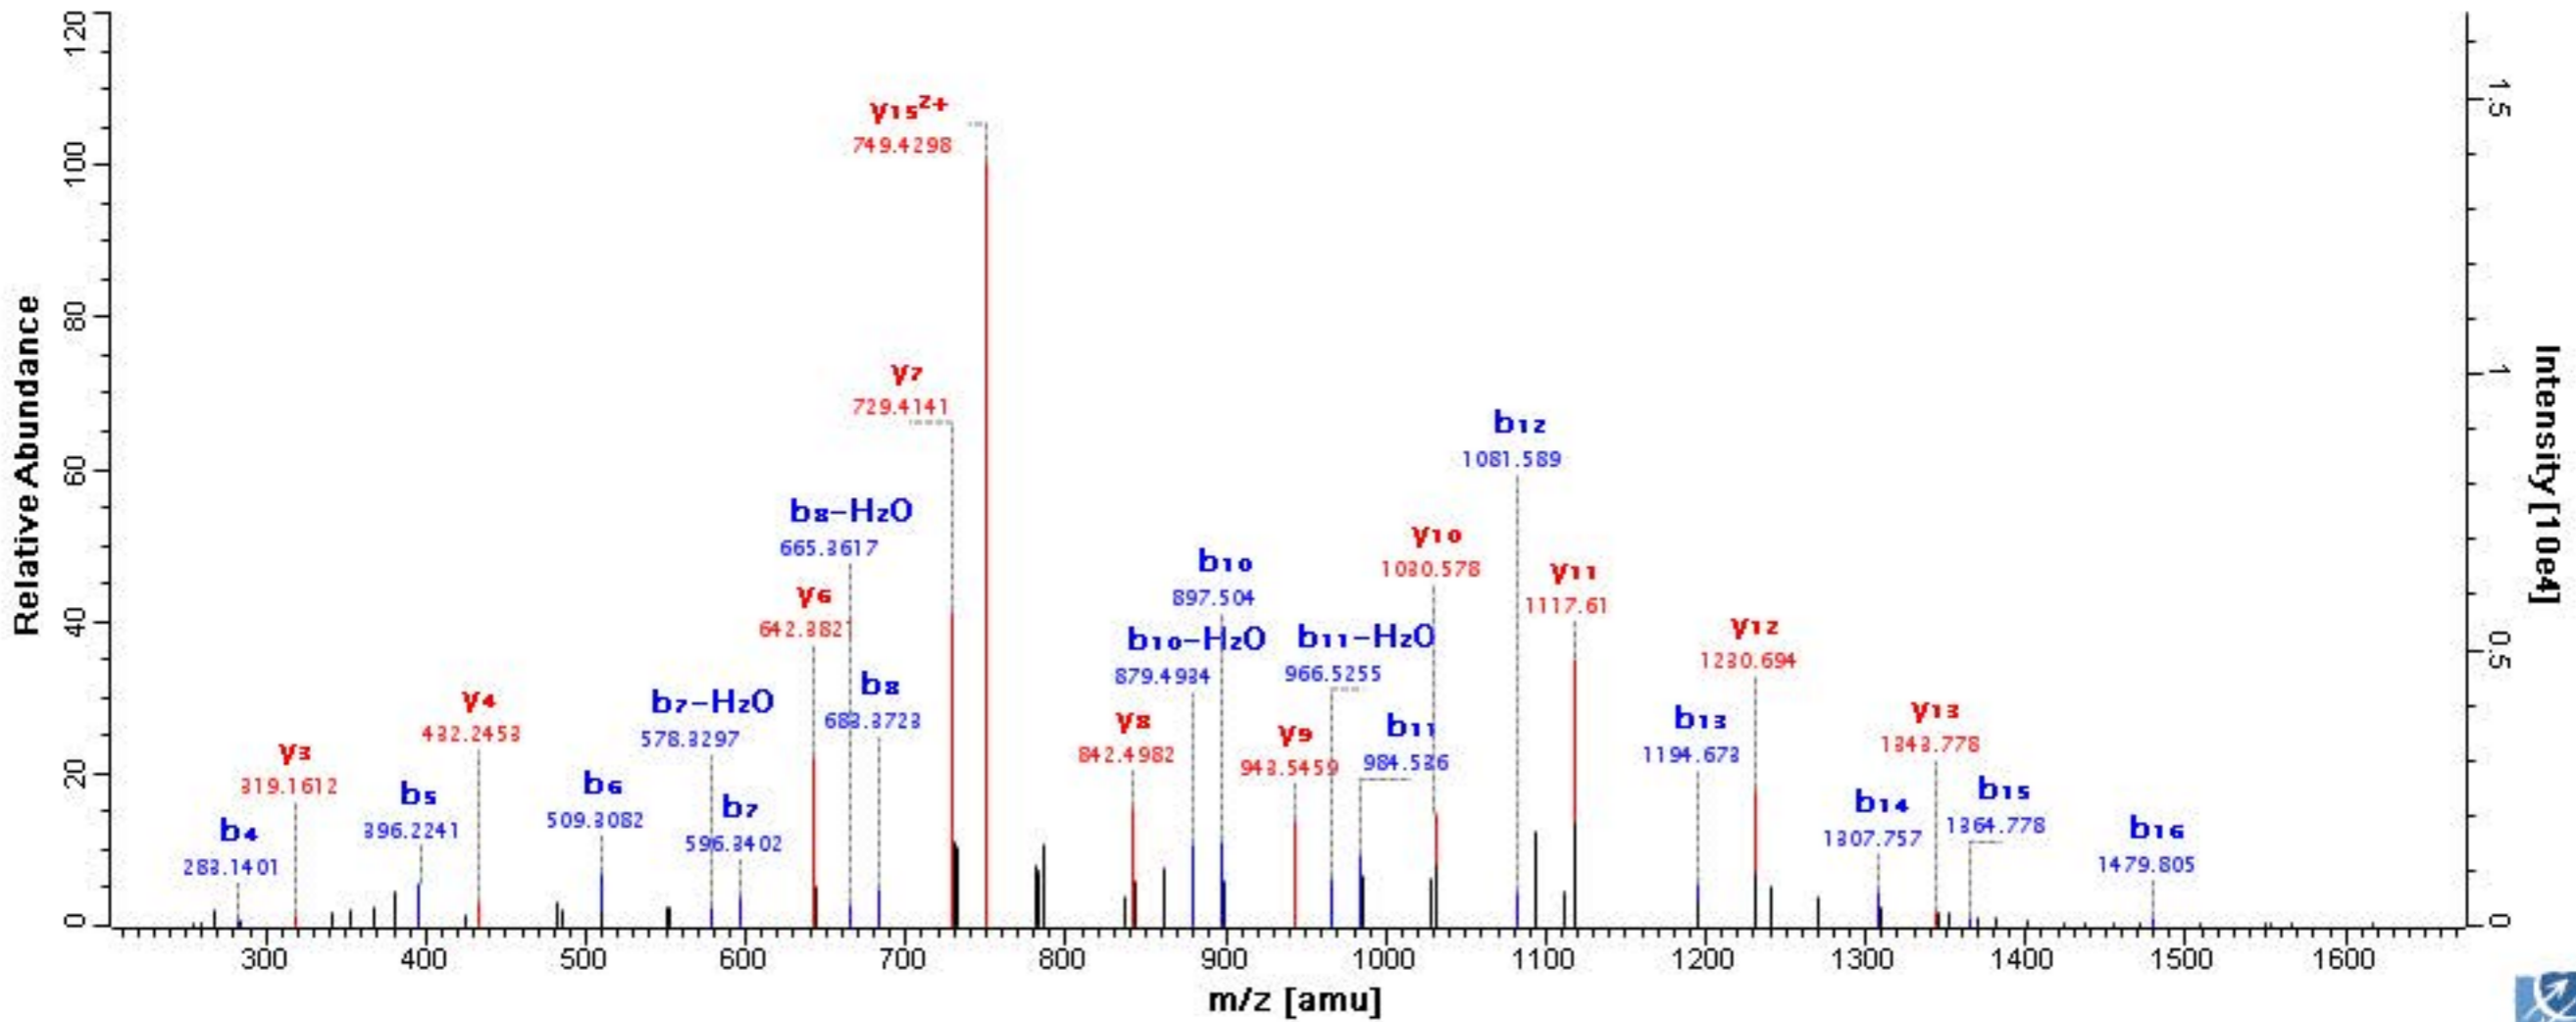

**precursor information**

|                   |                     |
|-------------------|---------------------|
| Mass:             | 1624.90333          |
| m/z:              | System.Collections. |
| Charge:           | System.Collections. |
| Retentiontime:    | System.Collections. |
| Score:            | 153.0896            |
| Mass Error [ppm]: | -0.15576            |
| PEP:              | 1.0535E-19          |
| Precursor Type:   | MULTI               |

| b ion      |              |    |     |    | y ion        |            | y <sup>2+</sup> ion |           |
|------------|--------------|----|-----|----|--------------|------------|---------------------|-----------|
| Δ dalton   | mass         |    | seq |    | Δ dalton     | mass       | Δ dalton            | mass      |
|            | 58.02874019  | 1  | G   | 16 |              |            |                     |           |
|            | 129.06585398 | 2  | A   | 15 | 1568.8893997 |            | 1568.8893997        |           |
|            | 226.11861783 | 3  | P   | 14 | 1497.852286  |            | 749.42978121        | +0.211149 |
| +0.1494082 | 283.14008155 | 4  | G   | 13 | 1400.7995221 |            | 1400.7995221        |           |
| -0.0916992 | 396.22414553 | 5  | I   | 12 | 1343.7780584 | -0.0092596 | 1343.7780584        |           |
| -0.0171329 | 509.30820951 | 6  | I   | 11 | 1230.6939944 | +0.1124021 | 1230.6939944        |           |
| +0.0451991 | 596.34023792 | 7  | S   | 10 | 1117.6099304 | +0.0772034 | 1117.6099304        |           |
| +0.0353875 | 683.37226633 | 8  | S   | 9  | 1030.577902  | +0.1354769 | 1030.577902         |           |
|            | 784.41994481 | 9  | T   | 8  | 943.5458736  | +0.03335   | 943.5458736         |           |
| +0.0938306 | 897.50400879 | 10 | I   | 7  | 842.49819513 | +0.1098981 | 842.49819513        |           |
| +0.1144755 | 984.5360372  | 11 | S   | 6  | 729.41413115 | +0.0524826 | 729.41413115        |           |
| +0.0170339 | 1081.5888011 | 12 | P   | 5  | 642.38210274 | +0.0378802 | 642.38210274        |           |
| +0.0689563 | 1194.672865  | 13 | I   | 4  | 545.32933889 |            | 545.32933889        |           |
| +0.0943893 | 1307.756929  | 14 | I   | 3  | 432.24527491 | +0.2126719 | 432.24527491        |           |
| +0.0634041 | 1364.7783927 | 15 | G   | 2  | 319.16121093 | +0.1694165 | 319.16121093        |           |
| +0.0406115 | 1479.8053358 | 16 | D   | 1  | 262.1397472  |            | 262.1397472         |           |
|            |              | 17 | K   | 0  | 147.11280417 |            | 147.11280417        |           |

**general information**

|                       |             |
|-----------------------|-------------|
| Annotation:           | 14 of 17    |
| AminoAcids Coverag    | 82 %        |
| Intensity Coverage:   | 65 %        |
| Protein Localisation: | 161 ... 177 |

Source: 20120521\_VR\_Bsu\_TripleSILACrep1\_L2ESLS\_OG\_F06  
 Scannumber: 9861  
 Protein: BSU05640; ydgG  
 Peptide Score: 95.52  
 Method: ITMS; CID; 3

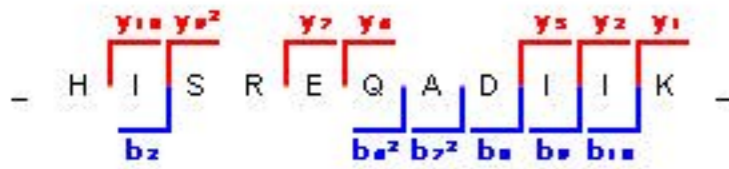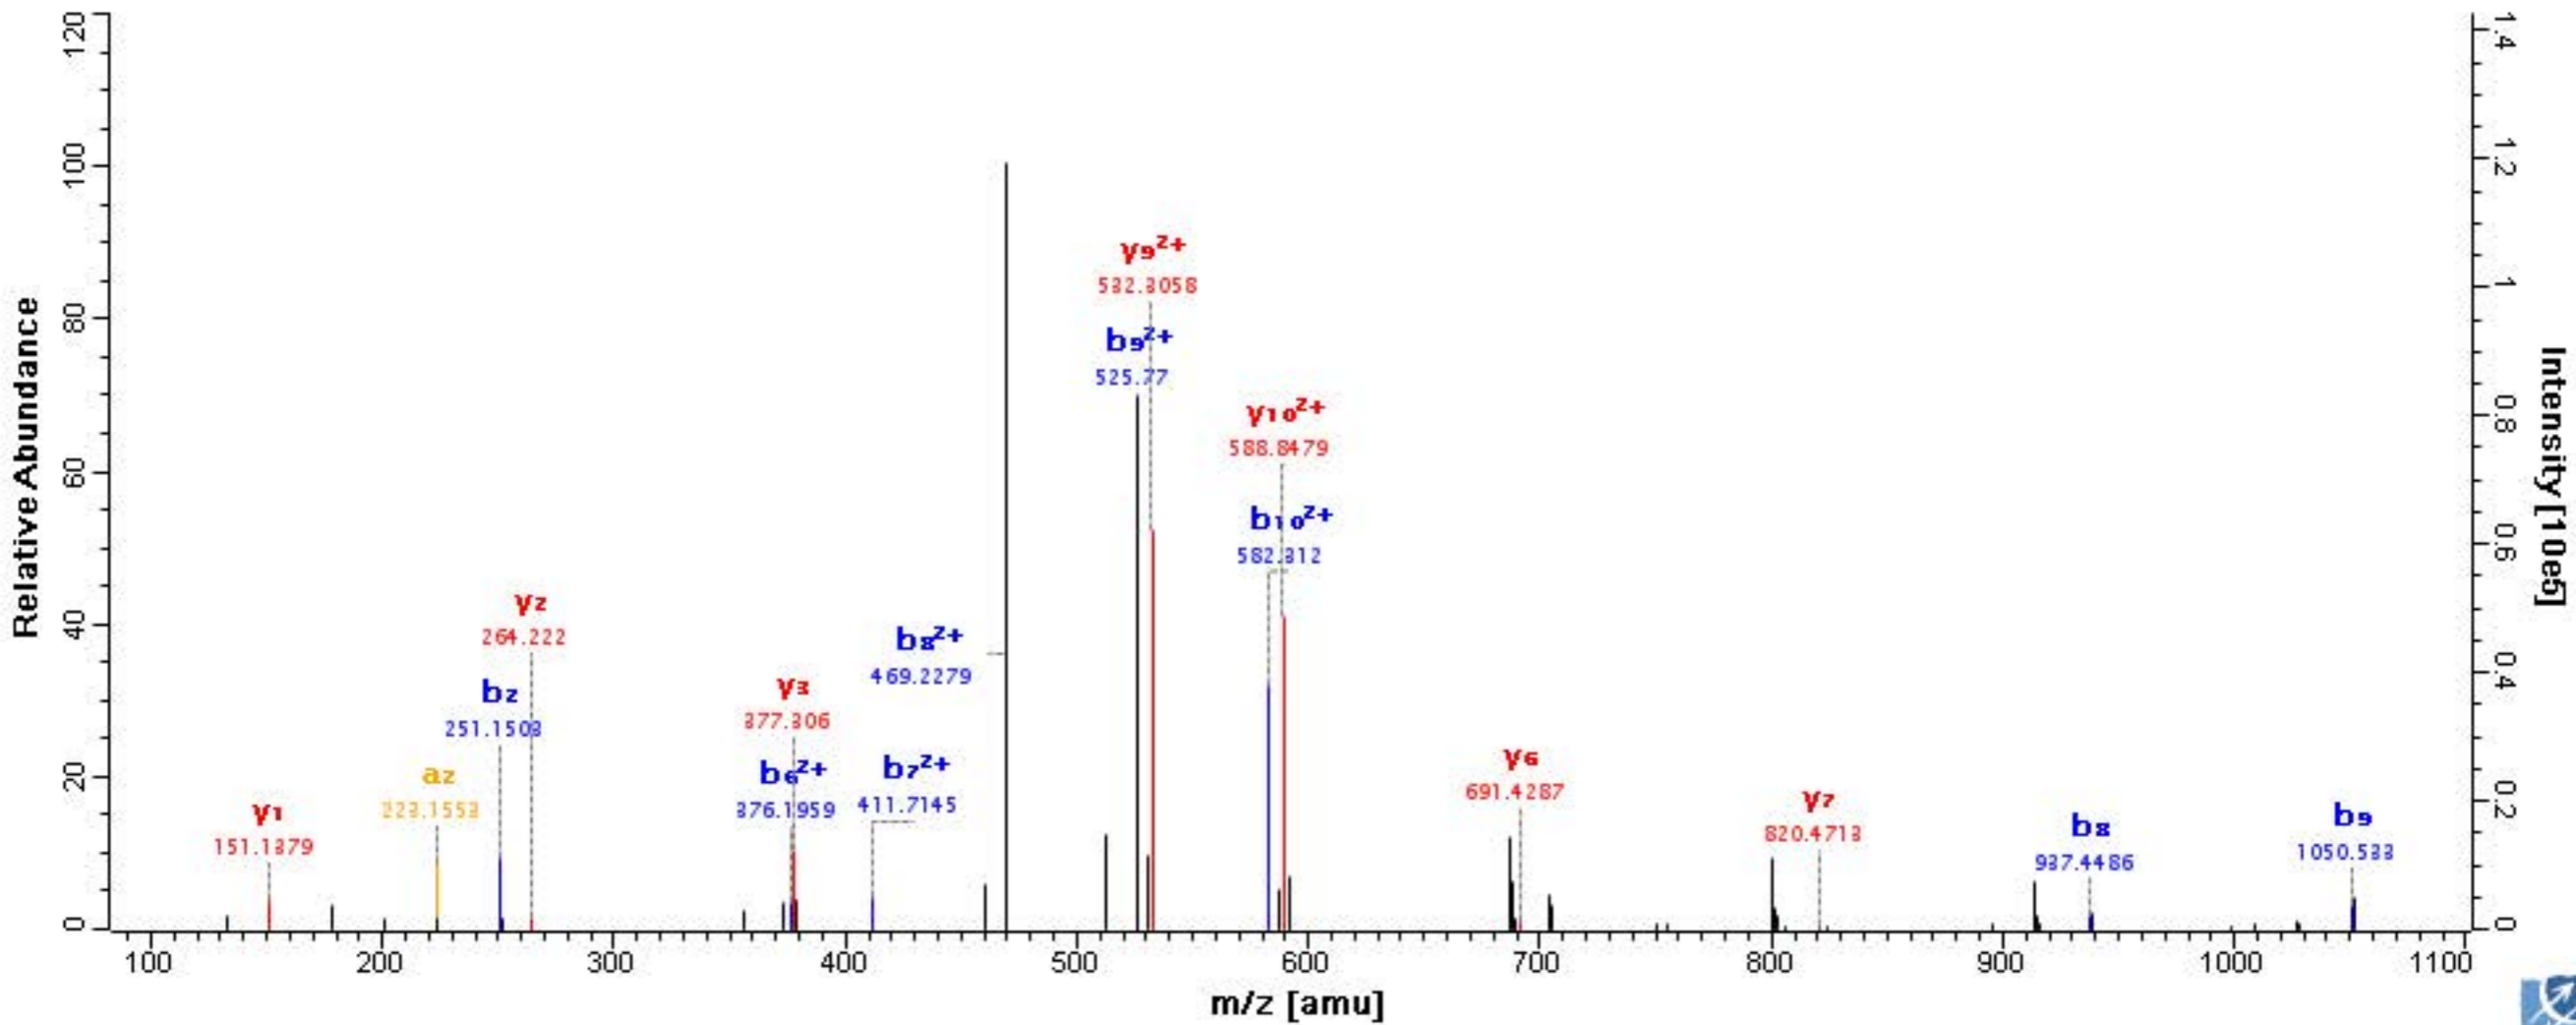

#### precursor information

|                   |                     |
|-------------------|---------------------|
| Mass:             | 1308.71563          |
| m/z:              | System.Collections. |
| Charge:           | System.Collections. |
| Retentiontime:    | System.Collections. |
| Score:            | 95.52309            |
| Mass Error [ppm]: | 0.47775             |
| PEP:              | 0.00082245          |
| Precursor Type:   | MULTI               |

#### general information

|                       |           |
|-----------------------|-----------|
| Annotation:           | 9 of 11   |
| AminoAcids Coverage:  | 82 %      |
| Intensity Coverage:   | 40 %      |
| Protein Localisation: | 35 ... 45 |

| a ion    |         | b <sup>2+</sup> ion |         | b ion    |         |    |     |    | y ion    |          | y <sup>2+</sup> ion |          |
|----------|---------|---------------------|---------|----------|---------|----|-----|----|----------|----------|---------------------|----------|
| Δ dalton | mass    | Δ dalton            | mass    | Δ dalton | mass    |    | seq |    | Δ dalton | mass     | Δ dalton            | mass     |
|          | 110.071 |                     | 138.066 |          | 138.066 | 1  | H   | 10 |          |          |                     |          |
| -0.0614  | 223.155 |                     | 251.15  | -0.0574  | 251.15  | 2  | I   | 9  | 1176.69  |          | 588.848             | +0.36172 |
|          | 310.187 |                     | 338.182 |          | 338.182 | 3  | S   | 8  | 1063.6   |          | 532.306             | +0.26010 |
|          | 466.288 |                     | 494.283 |          | 494.283 | 4  | R   | 7  | 976.572  |          | 976.572             |          |
|          | 595.331 |                     | 623.326 |          | 623.326 | 5  | E   | 6  | 820.471  | +0.35643 | 820.471             |          |
|          | 723.39  | +0.1040             | 376.196 |          | 751.385 | 6  | Q   | 5  | 691.429  | +0.31553 | 691.429             |          |
|          | 794.427 | +0.45099            | 411.714 |          | 822.422 | 7  | A   | 4  | 563.37   |          | 563.37              |          |
|          | 909.454 | -0.274              | 469.228 | +0.2226  | 937.449 | 8  | D   | 3  | 492.333  |          | 492.333             |          |
|          | 1022.54 | -0.1292             | 525.77  | +0.14493 | 1050.53 | 9  | I   | 2  | 377.306  | -0.0093  | 377.306             |          |
|          | 1135.62 | +0.487              | 582.312 |          | 1163.62 | 10 | I   | 1  | 264.222  | +0.13957 | 264.222             |          |
|          |         |                     |         |          |         | 11 | K   | 0  | 151.138  | -0.0894  | 151.138             |          |

Source: 20120521\_VR\_Bsu\_TripleSILACrep1\_L2ESLS\_OG\_F07  
 Scannumber: 15013  
 Protein: BSU11560; yjbl  
 Peptide Score: 111.86  
 Method: ITMS; CID; 3

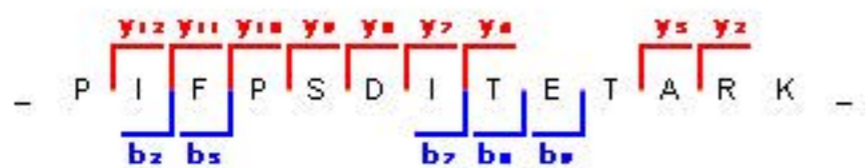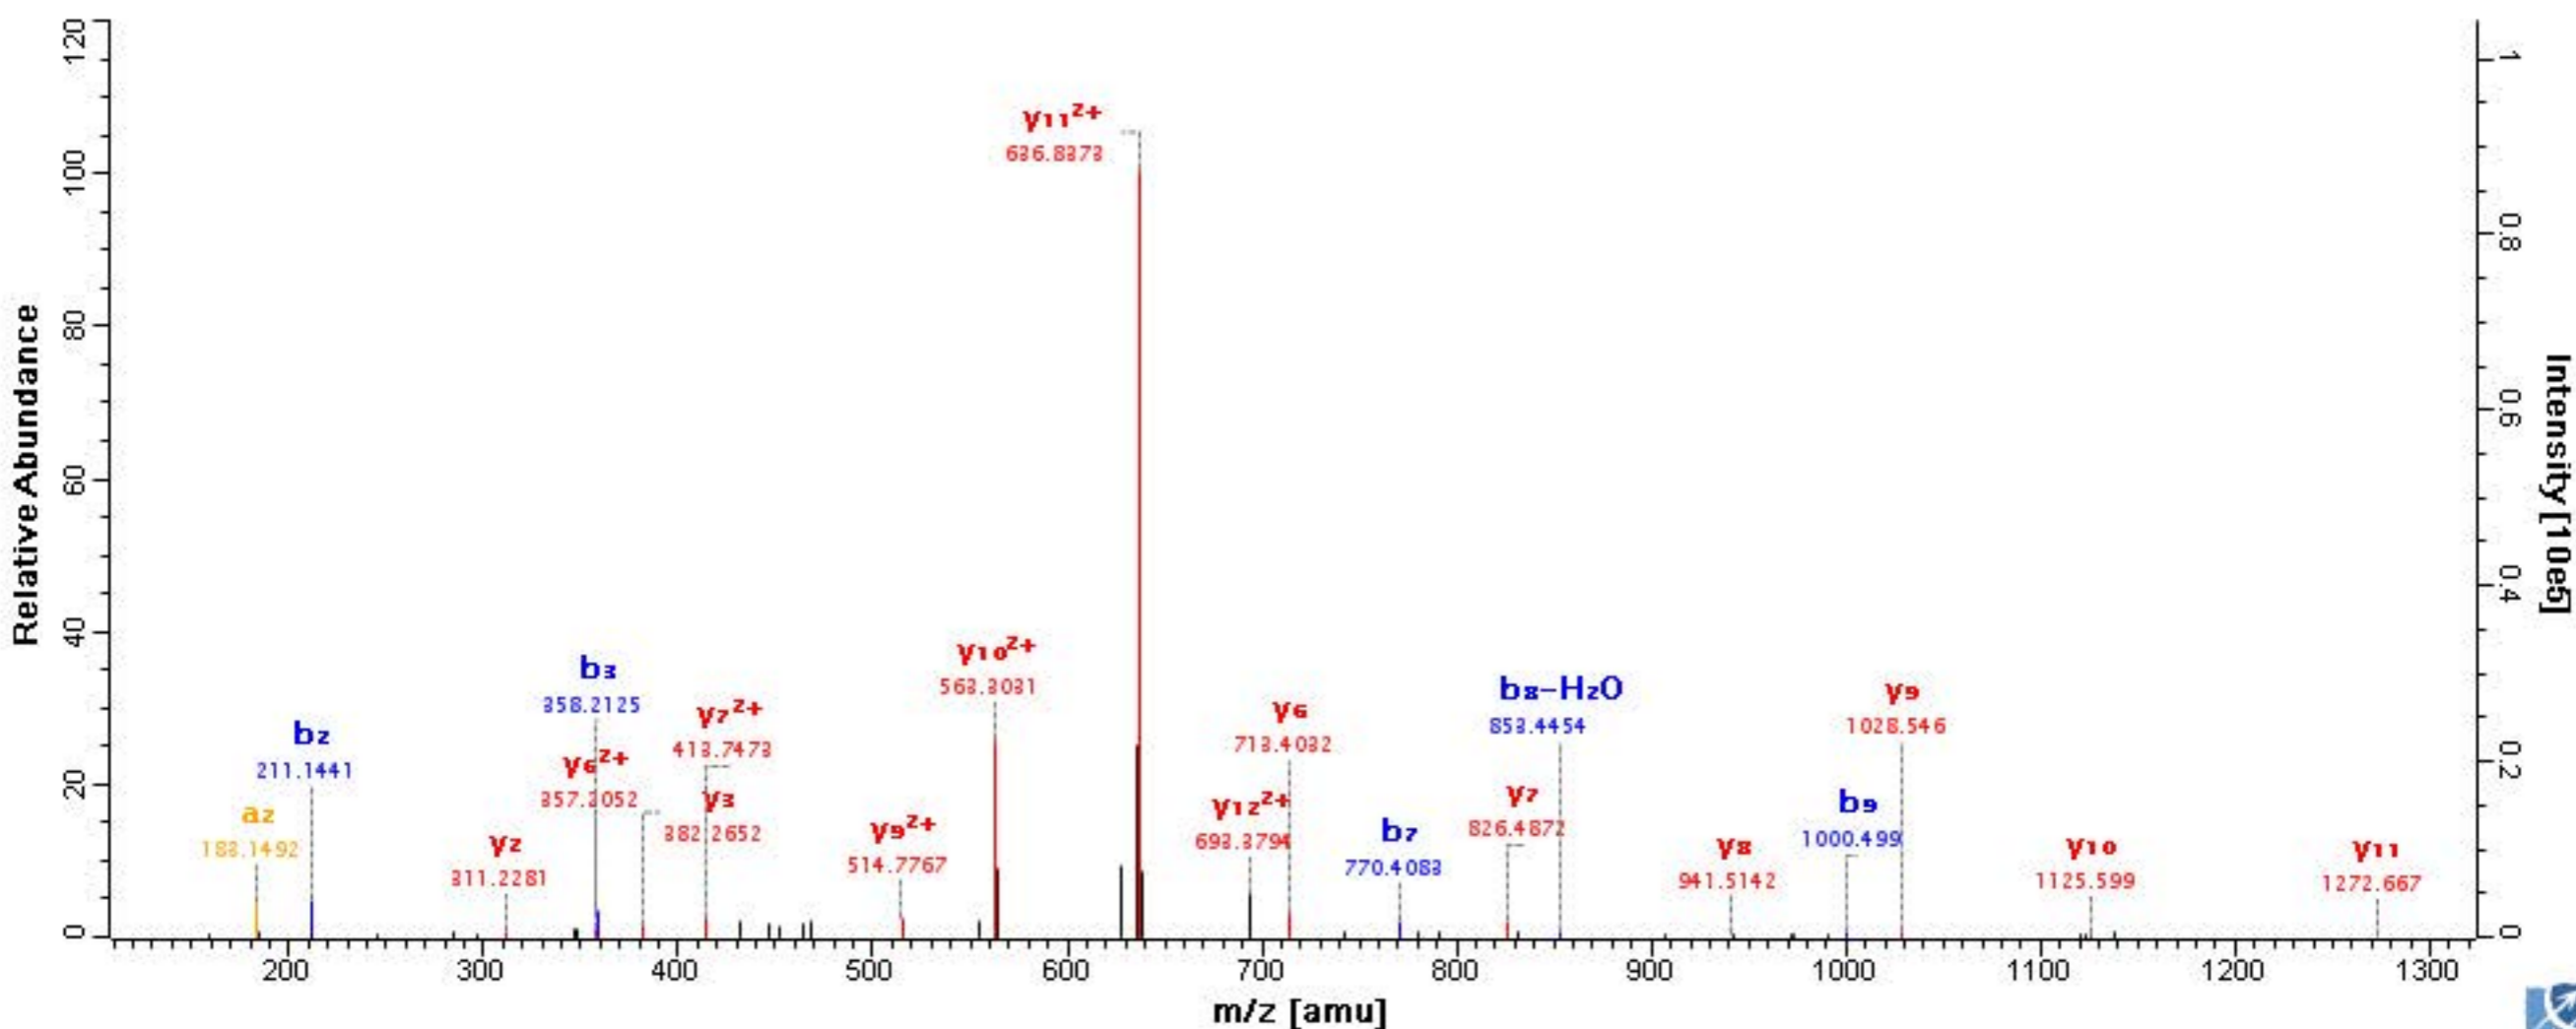

**precursor information**

|                   |                     |
|-------------------|---------------------|
| Mass:             | 1473.78254          |
| m/z:              | System.Collections. |
| Charge:           | System.Collections. |
| Retentiontime:    | System.Collections. |
| Score:            | 111.8553            |
| Mass Error [ppm]: | -0.13412            |
| PEP:              | 0.00075642          |
| Precursor Type:   | MULTI               |

**general information**

|                       |           |
|-----------------------|-----------|
| Annotation:           | 10 of 13  |
| AminoAcids Coverag    | 77 %      |
| Intensity Coverage:   | 65 %      |
| Protein Localisation: | 36 ... 48 |

| a ion     |          | b ion     |          | seq |   |    | y ion    |           | y <sup>2+</sup> ion |           |
|-----------|----------|-----------|----------|-----|---|----|----------|-----------|---------------------|-----------|
| Δ dalton  | mass     | Δ dalton  | mass     |     |   |    | Δ dalton | mass      | Δ dalton            | mass      |
|           | 70.06513 |           | 98.06004 | 1   | P | 12 |          |           |                     |           |
| -0.051381 | 183.1492 | -0.0094   | 211.1441 | 2   | I | 11 | 1385.751 |           | 693.3794            | +0.11685  |
|           | 330.2176 | +0.032538 | 358.2125 | 3   | F | 10 | 1272.667 | +0.363249 | 636.8373            | +0.291939 |
|           | 427.2704 |           | 455.2653 | 4   | P | 9  | 1125.599 | +0.276023 | 563.3031            | +0.163609 |
|           | 514.3024 |           | 542.2973 | 5   | S | 8  | 1028.546 | +0.159841 | 514.7767            | +0.171802 |
|           | 629.3293 |           | 657.3243 | 6   | D | 7  | 941.5142 | +0.282019 | 941.5142            |           |
|           | 742.4134 | +0.096199 | 770.4083 | 7   | I | 6  | 826.4872 | +0.221804 | 413.7473            | -0.120367 |
|           | 843.4611 |           | 871.456  | 8   | T | 5  | 713.4032 | +0.149312 | 357.2052            | +0.077549 |
|           | 972.5037 | +0.349067 | 1000.499 | 9   | E | 4  | 612.3555 |           | 612.3555            |           |
|           | 1073.551 |           | 1101.546 | 10  | T | 3  | 483.3129 |           | 483.3129            |           |
|           | 1144.588 |           | 1172.583 | 11  | A | 2  | 382.2652 | +0.197297 | 382.2652            |           |
|           | 1300.69  |           | 1328.684 | 12  | R | 1  | 311.2281 | +0.158605 | 311.2281            |           |
|           |          |           |          | 13  | K | 0  | 155.127  |           | 155.127             |           |



Source: 20120521\_VR\_Bsu\_TripleSILACrep1\_L2ESLS\_OG\_F07  
 Scannumber: 16716  
 Protein: BSU13730; queD; ykvK  
 Peptide Score: 140.74  
 Method: ITMS; CID; 3

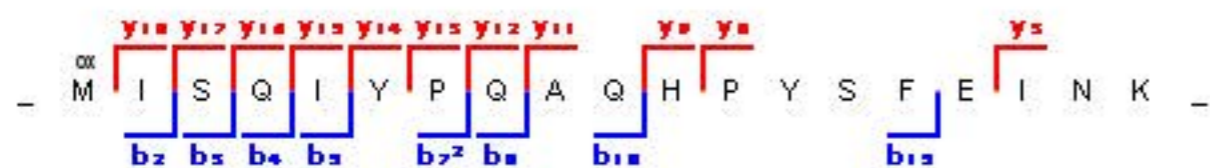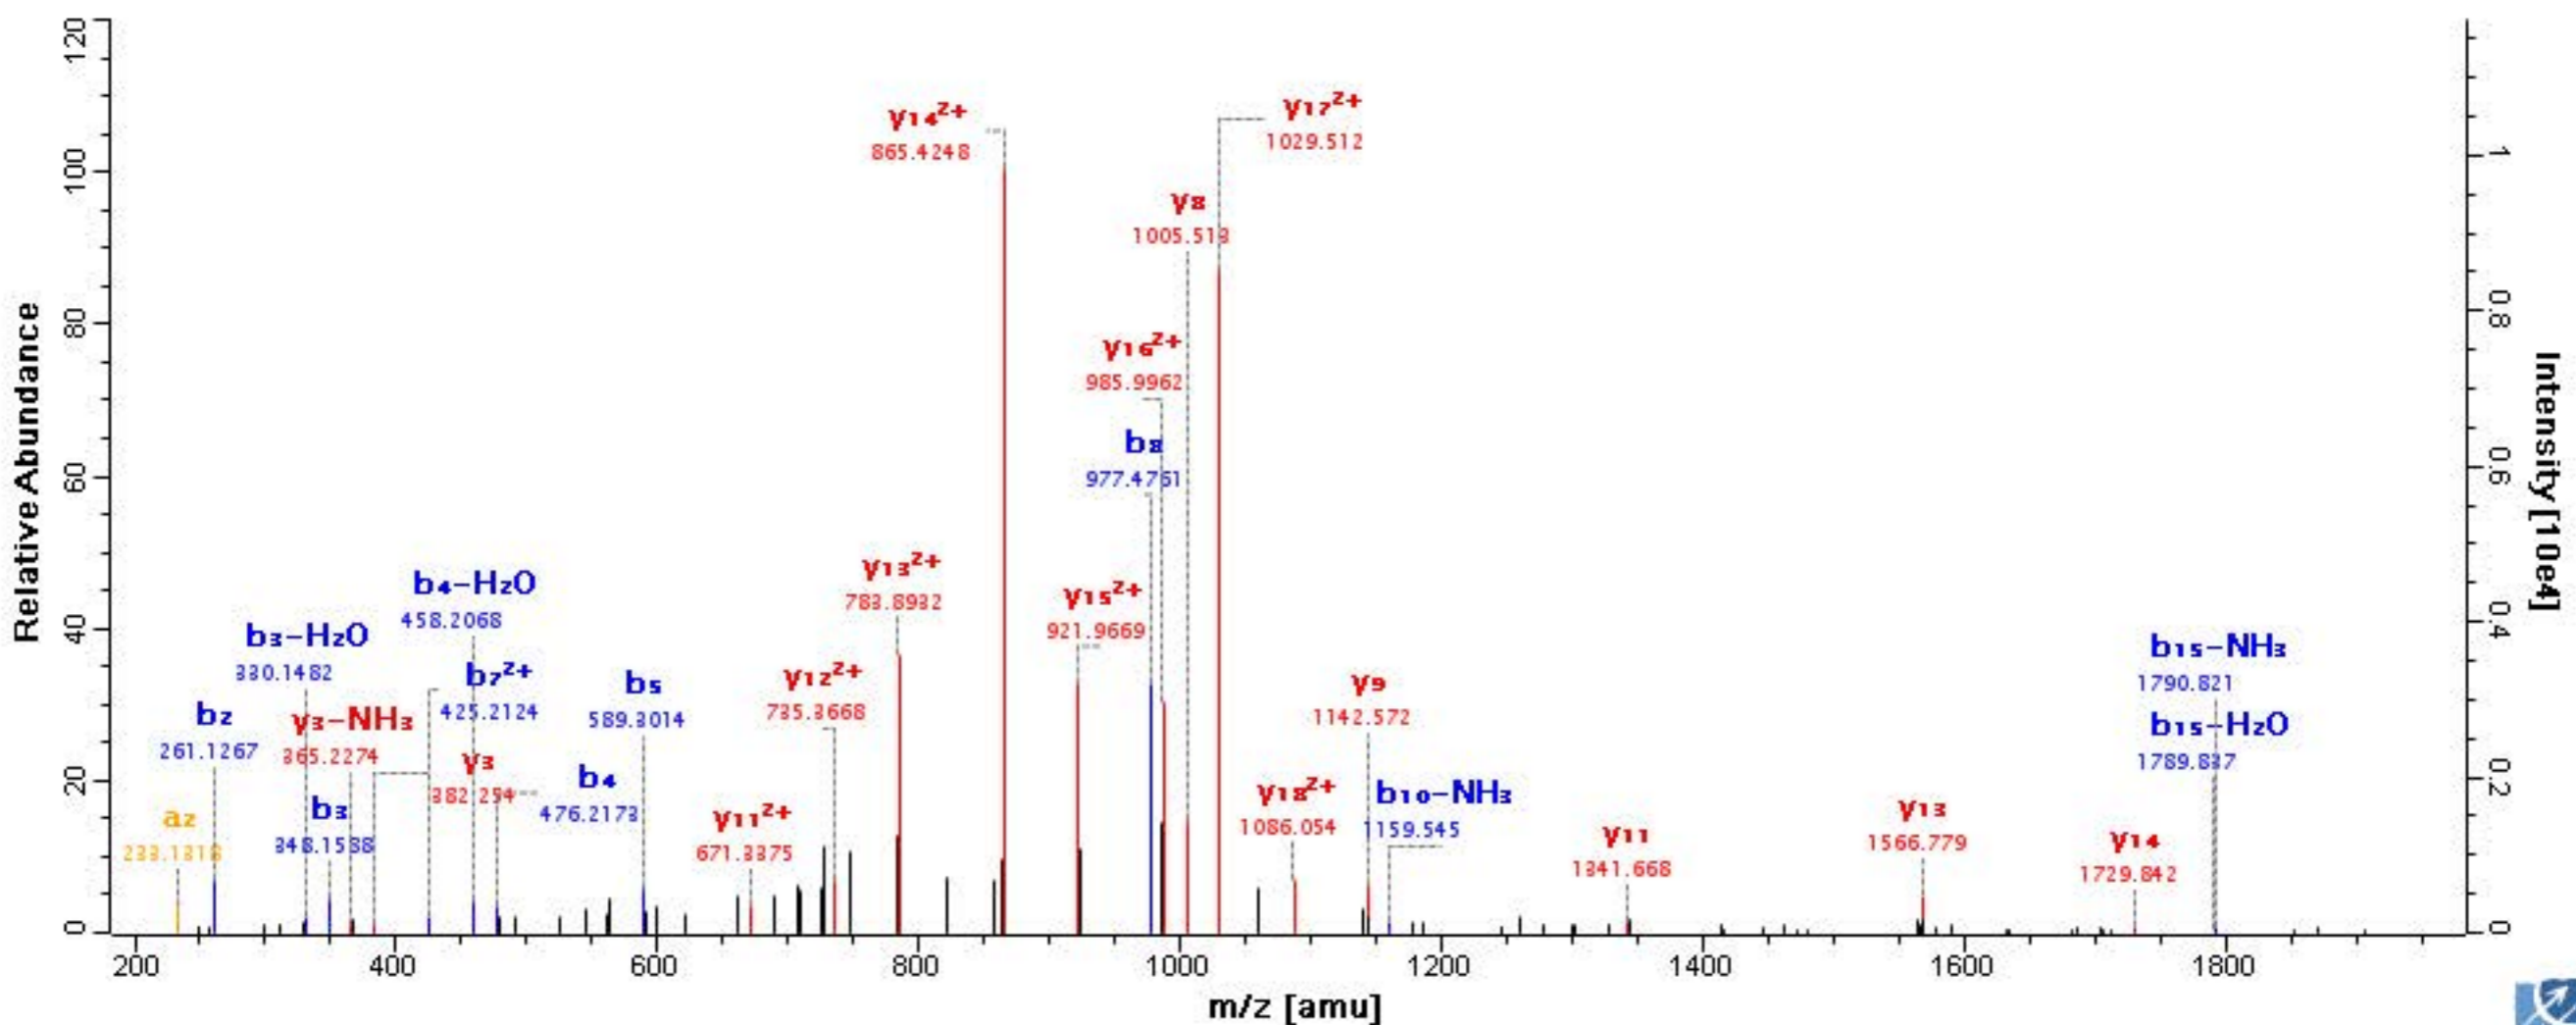

#### precursor information

|                   |                     |
|-------------------|---------------------|
| Mass:             | 2309.11079          |
| m/z:              | System.Collections. |
| Charge:           | System.Collections. |
| Retentiontime:    | System.Collections. |
| Score:            | 140.7373            |
| Mass Error [ppm]: | -1.8386             |
| PEP:              | 2.4627E-21          |
| Precursor Type:   | MULTI               |

| a ion    |         | b <sup>2+</sup> ion |         | b ion    |         | seq      |      |          | y ion   |          | y <sup>2+</sup> ion |          |
|----------|---------|---------------------|---------|----------|---------|----------|------|----------|---------|----------|---------------------|----------|
| Δ dalton | mass    | Δ dalton            | mass    | Δ dalton | mass    | Δ dalton | mass | Δ dalton | mass    | Δ dalton | mass                |          |
|          | 120.048 |                     | 148.043 |          | 148.043 | 1        | M    | 18       |         |          |                     |          |
| -0.1342  | 233.132 |                     | 261.127 | -0.1432  | 261.127 | 2        | I    | 17       | 2171.1  |          | 1086.05             | +0.3133! |
|          | 320.164 |                     | 348.159 | +0.03184 | 348.159 | 3        | S    | 16       | 2058.02 |          | 1029.51             | +0.2906! |
|          | 448.222 |                     | 476.217 | +0.13196 | 476.217 | 4        | Q    | 15       | 1970.99 |          | 985.996             | +0.1526! |
|          | 561.306 |                     | 589.301 | +0.16038 | 589.301 | 5        | I    | 14       | 1842.93 |          | 921.967             | +0.0436! |
|          | 724.37  |                     | 752.365 |          | 752.365 | 6        | Y    | 13       | 1729.84 | -0.1315  | 865.425             | +0.2477! |
|          | 821.423 | -0.0219             | 425.212 |          | 849.418 | 7        | P    | 12       | 1566.78 | -0.02    | 783.893             | +0.2030! |
|          | 949.481 |                     | 977.476 | +0.32183 | 977.476 | 8        | Q    | 11       | 1469.73 |          | 735.367             | +0.0812! |
|          | 1020.52 |                     | 1048.51 |          | 1048.51 | 9        | A    | 10       | 1341.67 | +0.2843  | 671.338             | -0.0518  |
|          | 1148.58 |                     | 1176.57 |          | 1176.57 | 10       | Q    | 9        | 1270.63 |          | 1270.63             |          |
|          | 1285.64 |                     | 1313.63 |          | 1313.63 | 11       | H    | 8        | 1142.57 | +0.08409 | 1142.57             |          |
|          | 1382.69 |                     | 1410.68 |          | 1410.68 | 12       | P    | 7        | 1005.51 | +0.07483 | 1005.51             |          |
|          | 1545.75 |                     | 1573.75 |          | 1573.75 | 13       | Y    | 6        | 908.46  |          | 908.46              |          |
|          | 1632.78 |                     | 1660.78 |          | 1660.78 | 14       | S    | 5        | 745.397 |          | 745.397             |          |
|          | 1779.85 |                     | 1807.85 |          | 1807.85 | 15       | F    | 4        | 658.365 |          | 658.365             |          |
|          | 1908.89 |                     | 1936.89 |          | 1936.89 | 16       | E    | 3        | 511.297 |          | 511.297             |          |
|          | 2021.98 |                     | 2049.97 |          | 2049.97 | 17       | I    | 2        | 382.254 | +0.12204 | 382.254             |          |
|          | 2136.02 |                     | 2164.02 |          | 2164.02 | 18       | N    | 1        | 269.17  |          | 269.17              |          |
|          |         |                     |         |          |         | 19       | K    | 0        | 155.127 |          | 155.127             |          |

#### general information

|                       |          |
|-----------------------|----------|
| Annotation:           | 13 of 19 |
| AminoAcids Coverage:  | 68 %     |
| Intensity Coverage:   | 58 %     |
| Protein Localisation: | 1 ... 19 |

Source: 20120521\_VR\_Bsu\_TripleSILACrep1\_L2ESLS\_OG\_F07  
 Scannumber: 19930  
 Protein: bfcB; BSU22550; qcrB  
 Peptide Score: 161.82  
 Method: ITMS; CID; 3

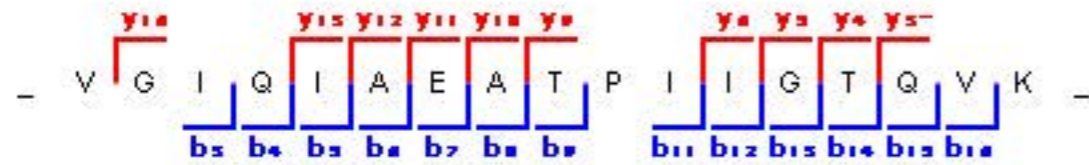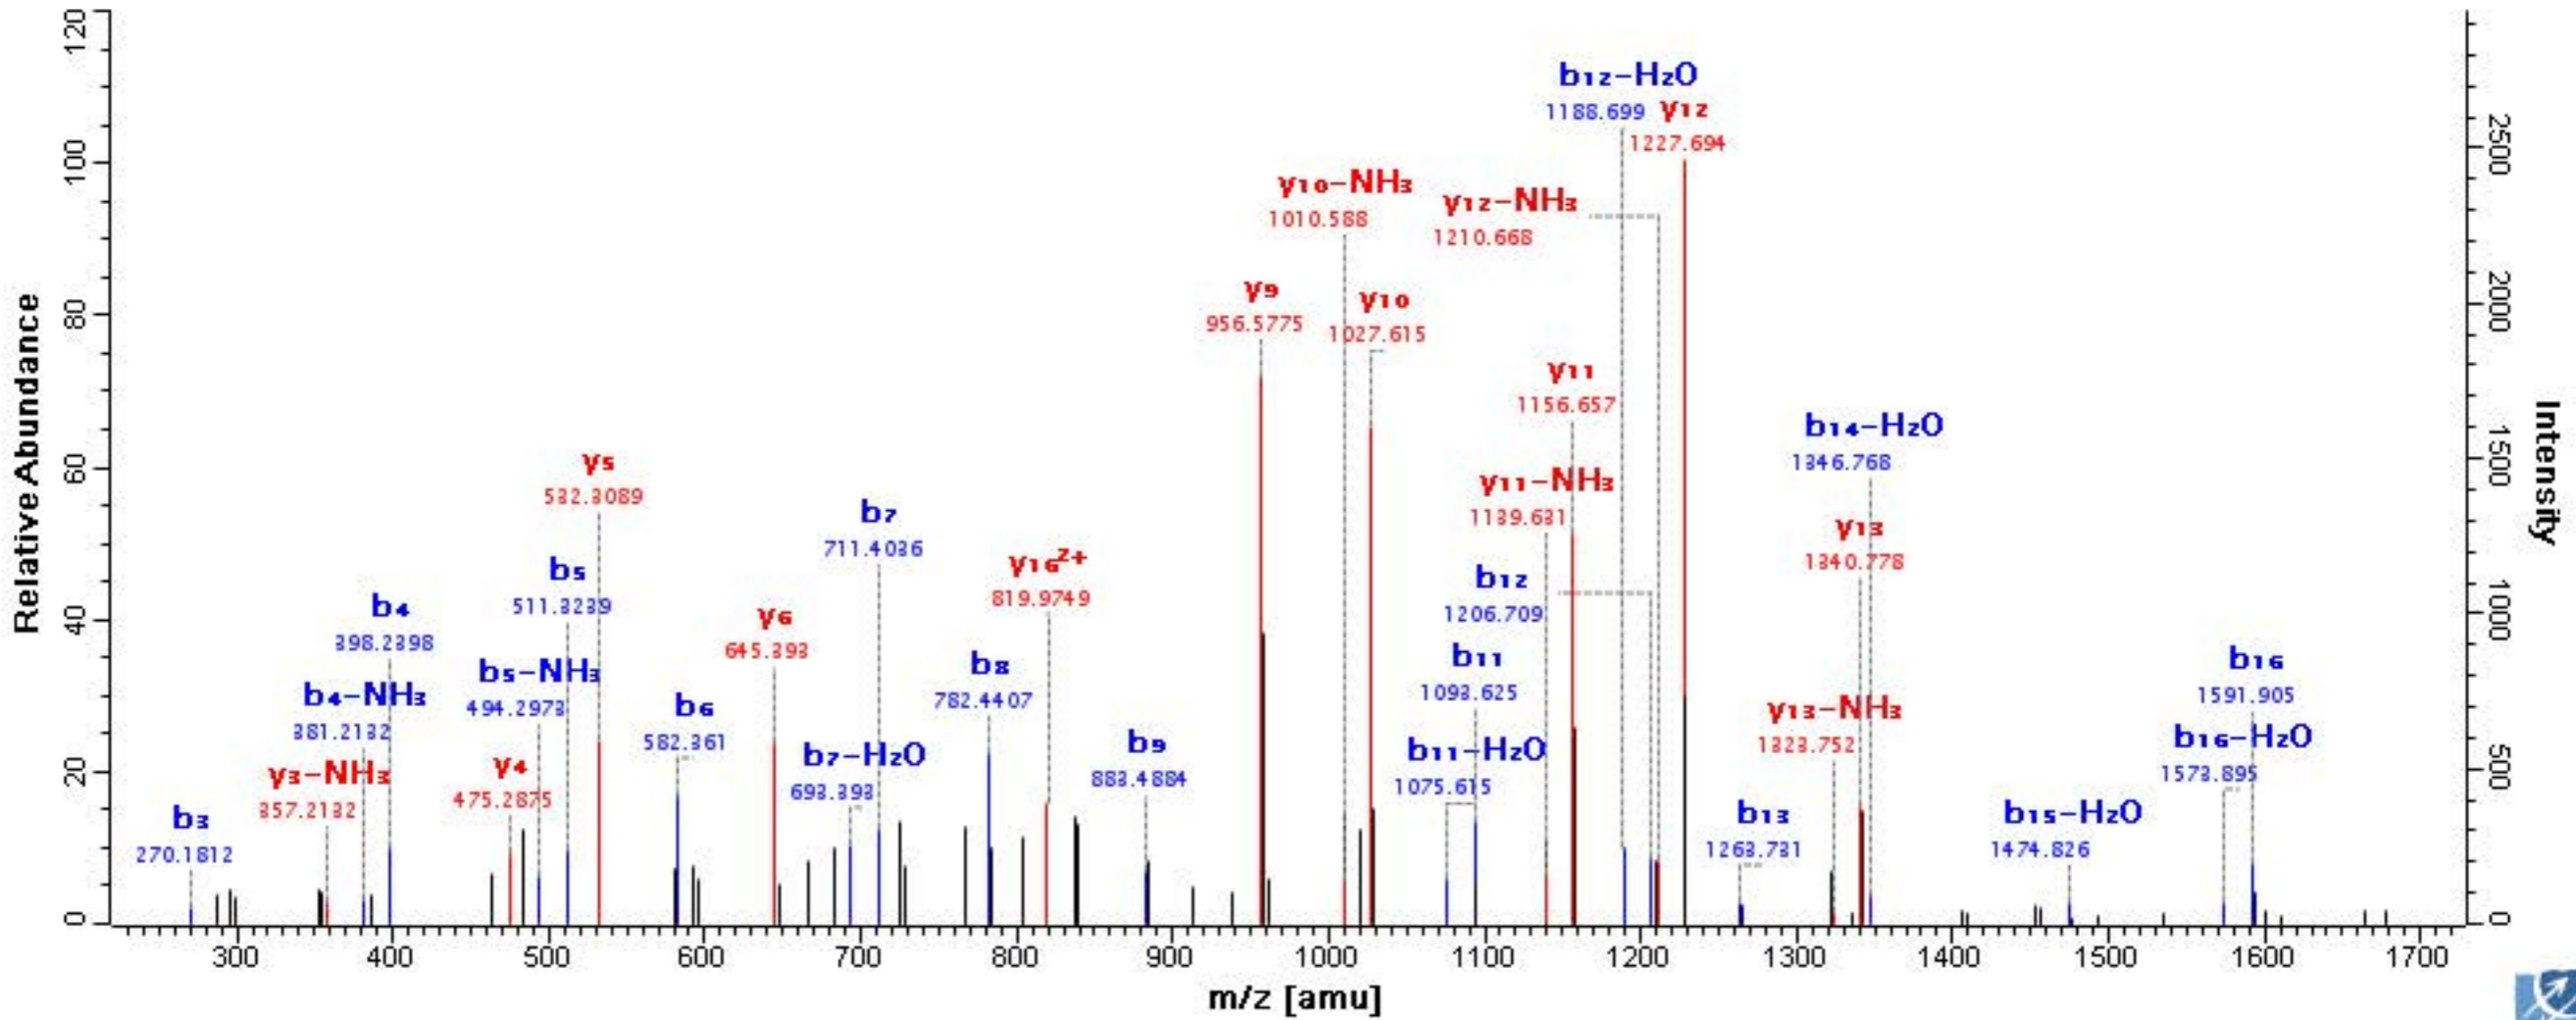

precursor information

|                   |                     |
|-------------------|---------------------|
| Mass:             | 1737.00347          |
| m/z:              | System.Collections. |
| Charge:           | System.Collections. |
| Retentiontime:    | System.Collections. |
| Score:            | 161.8241            |
| Mass Error [ppm]: | -0.093087           |
| PEP:              | 7.5833E-26          |
| Precursor Type:   | MULTI               |

| b ion      |              | seq |   |    | gamma ion    |            | gamma <sup>2+</sup> ion |            |
|------------|--------------|-----|---|----|--------------|------------|-------------------------|------------|
| Δ dalton   | mass         |     |   |    | Δ dalton     | mass       | Δ dalton                | mass       |
|            | 100.07569038 | 1   | V | 16 |              |            |                         |            |
|            | 157.09715411 | 2   | G | 15 | 1638.942498  |            | 819.97488721            | -0.2118257 |
| +0.0287429 | 270.18121809 | 3   | I | 14 | 1581.9210342 |            | 1581.9210342            |            |
| -0.0042609 | 398.2397956  | 4   | Q | 13 | 1468.8369702 |            | 1468.8369702            |            |
| +0.1310965 | 511.32385958 | 5   | I | 12 | 1340.7783927 | +0.2220955 | 1340.7783927            |            |
| +0.0800056 | 582.36097337 | 6   | A | 11 | 1227.6943288 | +0.0723949 | 1227.6943288            |            |
| +0.293394  | 711.40356646 | 7   | E | 10 | 1156.657215  | +0.0626337 | 1156.657215             |            |
| +0.1340878 | 782.44068025 | 8   | A | 9  | 1027.6146219 | +0.0651877 | 1027.6146219            |            |
| +0.0138385 | 883.48835872 | 9   | T | 8  | 956.57750808 | +0.0565862 | 956.57750808            |            |
|            | 980.54112258 | 10  | P | 7  | 855.52982961 |            | 855.52982961            |            |
| +0.1398281 | 1093.6251866 | 11  | I | 6  | 758.47706576 |            | 758.47706576            |            |
| +0.2072534 | 1206.7092505 | 12  | I | 5  | 645.39300178 | +0.0057409 | 645.39300178            |            |
| +0.226317  | 1263.7307143 | 13  | G | 4  | 532.3089378  | +0.0868752 | 532.3089378             |            |
|            | 1364.7783927 | 14  | T | 3  | 475.28747407 | +0.1531082 | 475.28747407            |            |
|            | 1492.8369702 | 15  | Q | 2  | 374.2397956  |            | 374.2397956             |            |
| +0.1041373 | 1591.9053842 | 16  | V | 1  | 246.18121809 |            | 246.18121809            |            |
|            |              | 17  | K | 0  | 147.11280417 |            | 147.11280417            |            |

general information

|                       |             |
|-----------------------|-------------|
| Annotation:           | 14 of 17    |
| AminoAcids Coverage:  | 82 %        |
| Intensity Coverage:   | 58 %        |
| Protein Localisation: | 158 ... 174 |

Source: 20120521\_VR\_Bsu\_TripleSILACrep1\_L2ESLS\_OG\_F07  
 Scannumber: 8500  
 Protein: BSU08240; catE; yfiE  
 Peptide Score: 108.9  
 Method: ITMS; CID; 3

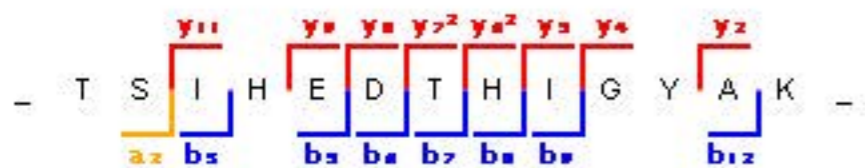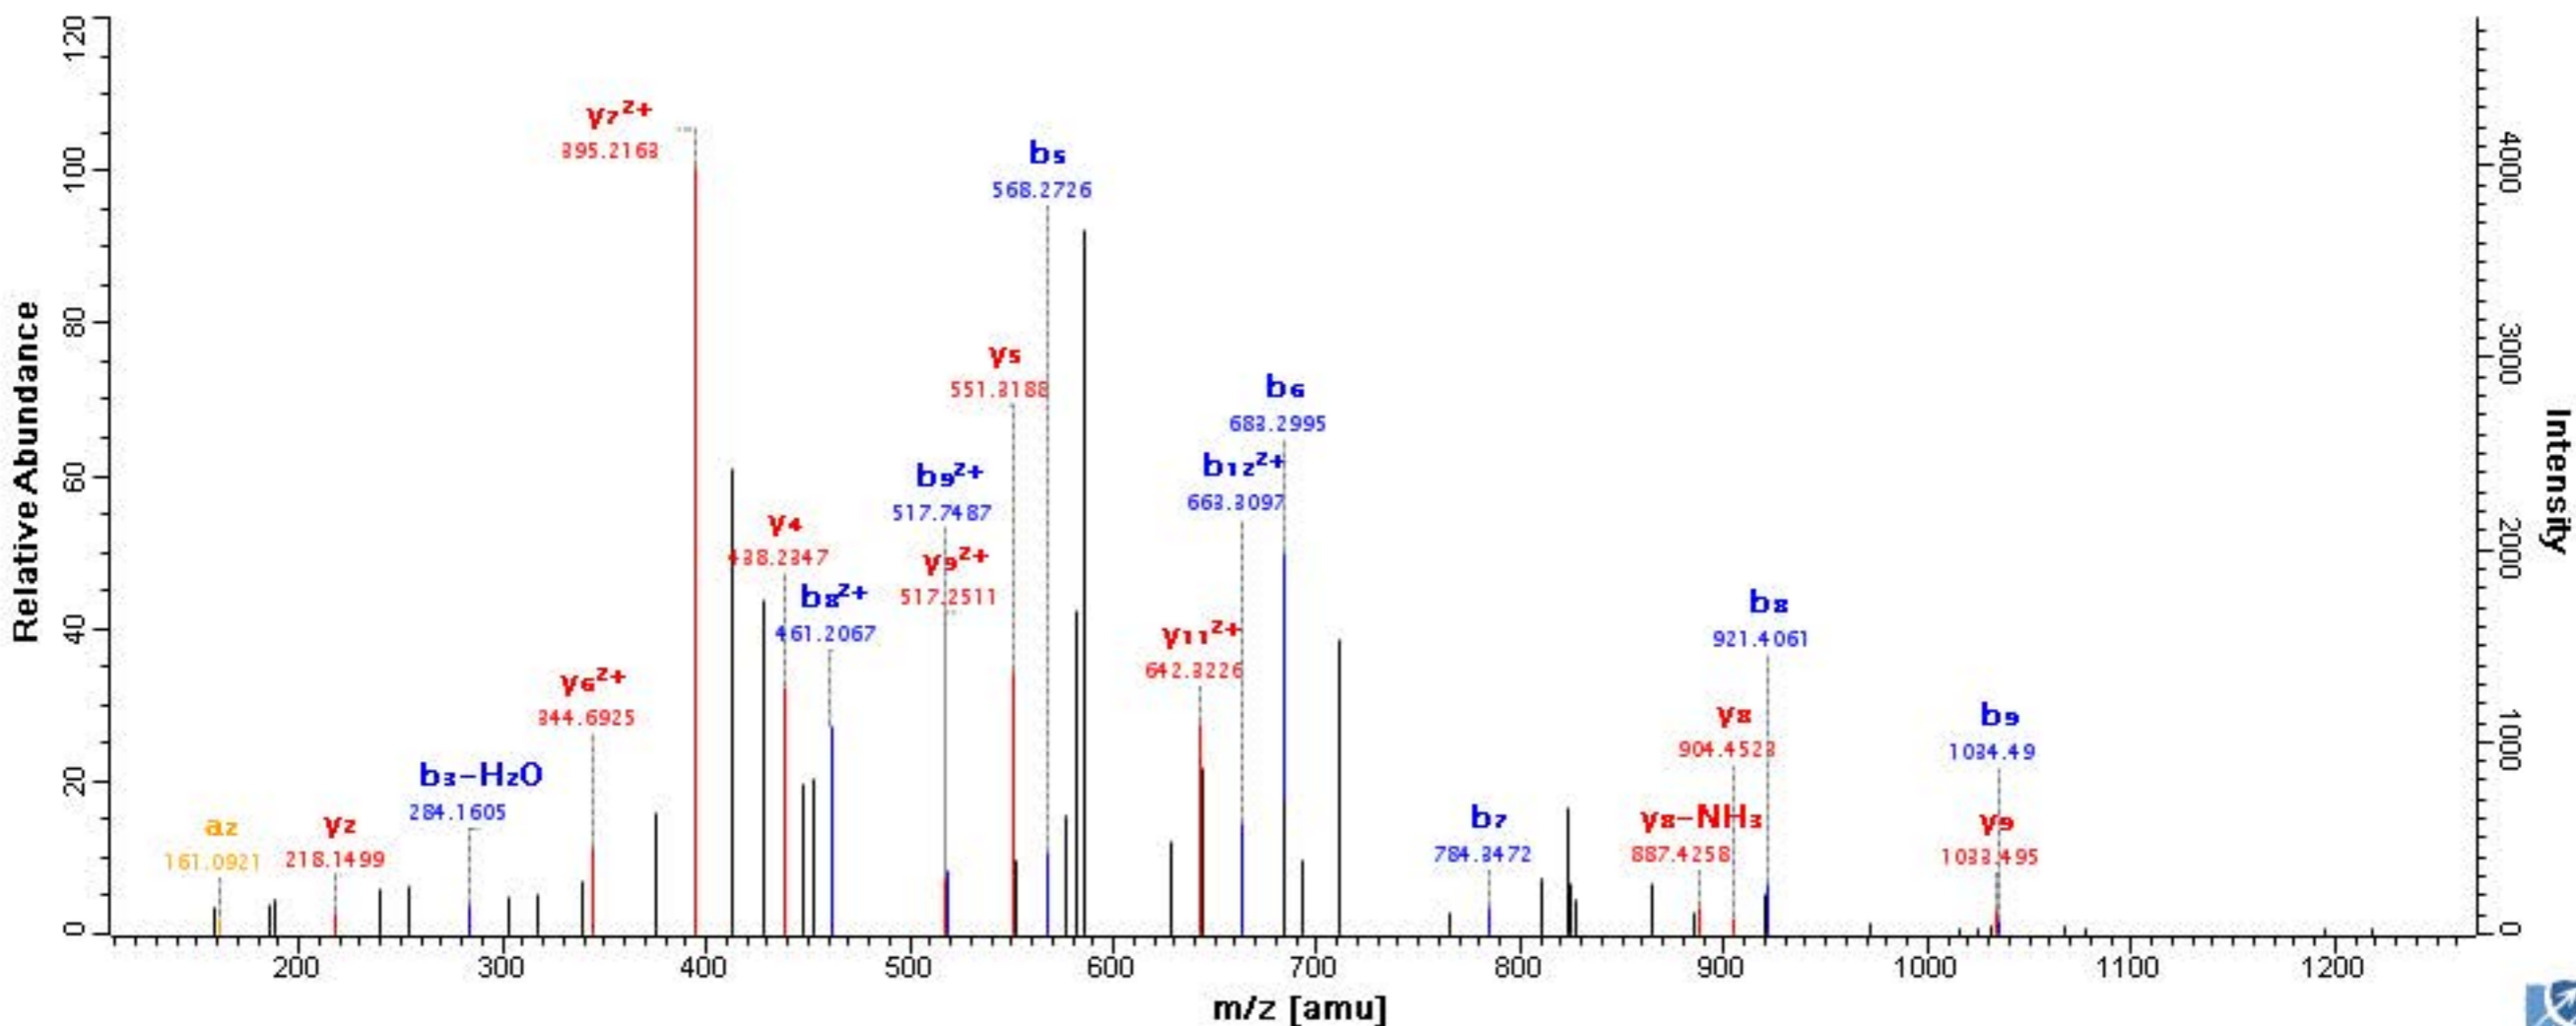

#### precursor information

|                   |                     |
|-------------------|---------------------|
| Mass:             | 1470.71096          |
| m/z:              | System.Collections. |
| Charge:           | System.Collections. |
| Retentiontime:    | System.Collections. |
| Score:            | 108.9032            |
| Mass Error [ppm]: | 0.44086             |
| PEP:              | 0.00014963          |
| Precursor Type:   | ISO                 |

#### general information

|                       |          |
|-----------------------|----------|
| Annotation:           | 9 of 13  |
| AminoAcids Coverage:  | 69 %     |
| Intensity Coverage:   | 40 %     |
| Protein Localisation: | 2 ... 14 |

| a ion    |         | b <sup>2+</sup> ion |         | b ion    |         |     | y ion |          | y <sup>2+</sup> ion |          |                 |
|----------|---------|---------------------|---------|----------|---------|-----|-------|----------|---------------------|----------|-----------------|
| Δ dalton | mass    | Δ dalton            | mass    | Δ dalton | mass    | seq |       | Δ dalton | mass                | Δ dalton | mass            |
|          | 74.06   |                     | 102.055 |          | 102.055 | 1   | T     | 12       |                     |          |                 |
| +0.00147 | 161.092 |                     | 189.087 |          | 189.087 | 2   | S     | 11       | 1370.67             |          | 1370.67         |
|          | 274.176 |                     | 302.171 |          | 302.171 | 3   | I     | 10       | 1283.64             |          | 642.323 +0.1133 |
|          | 411.235 |                     | 439.23  |          | 439.23  | 4   | H     | 9        | 1170.55             |          | 1170.55         |
|          | 540.278 |                     | 568.273 | -0.1408  | 568.273 | 5   | E     | 8        | 1033.49             | +0.14829 | 517.251 -0.1059 |
|          | 655.305 |                     | 683.299 | +0.0113  | 683.299 | 6   | D     | 7        | 904.452             | +0.04104 | 904.452         |
|          | 756.352 |                     | 784.347 | +0.27203 | 784.347 | 7   | T     | 6        | 789.425             |          | 395.216 +0.1254 |
|          | 893.411 | +0.45018            | 861.207 | +0.2639  | 821.406 | 8   | H     | 5        | 688.378             |          | 344.692 +0.1247 |
|          | 1006.5  | +0.27118            | 517.749 | +0.25753 | 1034.49 | 9   | I     | 4        | 551.319             | -0.0348  | 551.319         |
|          | 1063.52 |                     | 1091.51 |          | 1091.51 | 10  | G     | 3        | 438.235             | -0.1266  | 438.235         |
|          | 1226.58 |                     | 1254.57 |          | 1254.57 | 11  | Y     | 2        | 381.213             |          | 381.213         |
|          | 1297.62 | +0.108              | 663.31  |          | 1325.61 | 12  | A     | 1        | 218.15              | +0.101   | 218.15          |
|          |         |                     |         |          |         | 13  | K     | 0        | 147.113             |          | 147.113         |

Source: 201 20521\_VR\_Bsu\_TripleSILACrep1\_L2ESLS\_OG\_F08  
 Scannumber: 23798  
 Protein: BSU28040; ysxA  
 Peptide Score: 69.93  
 Method: ITMS; CID; 3

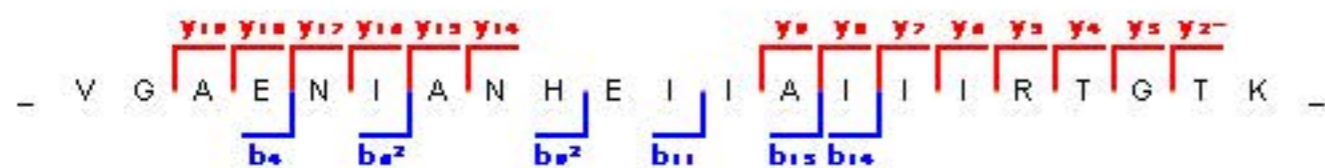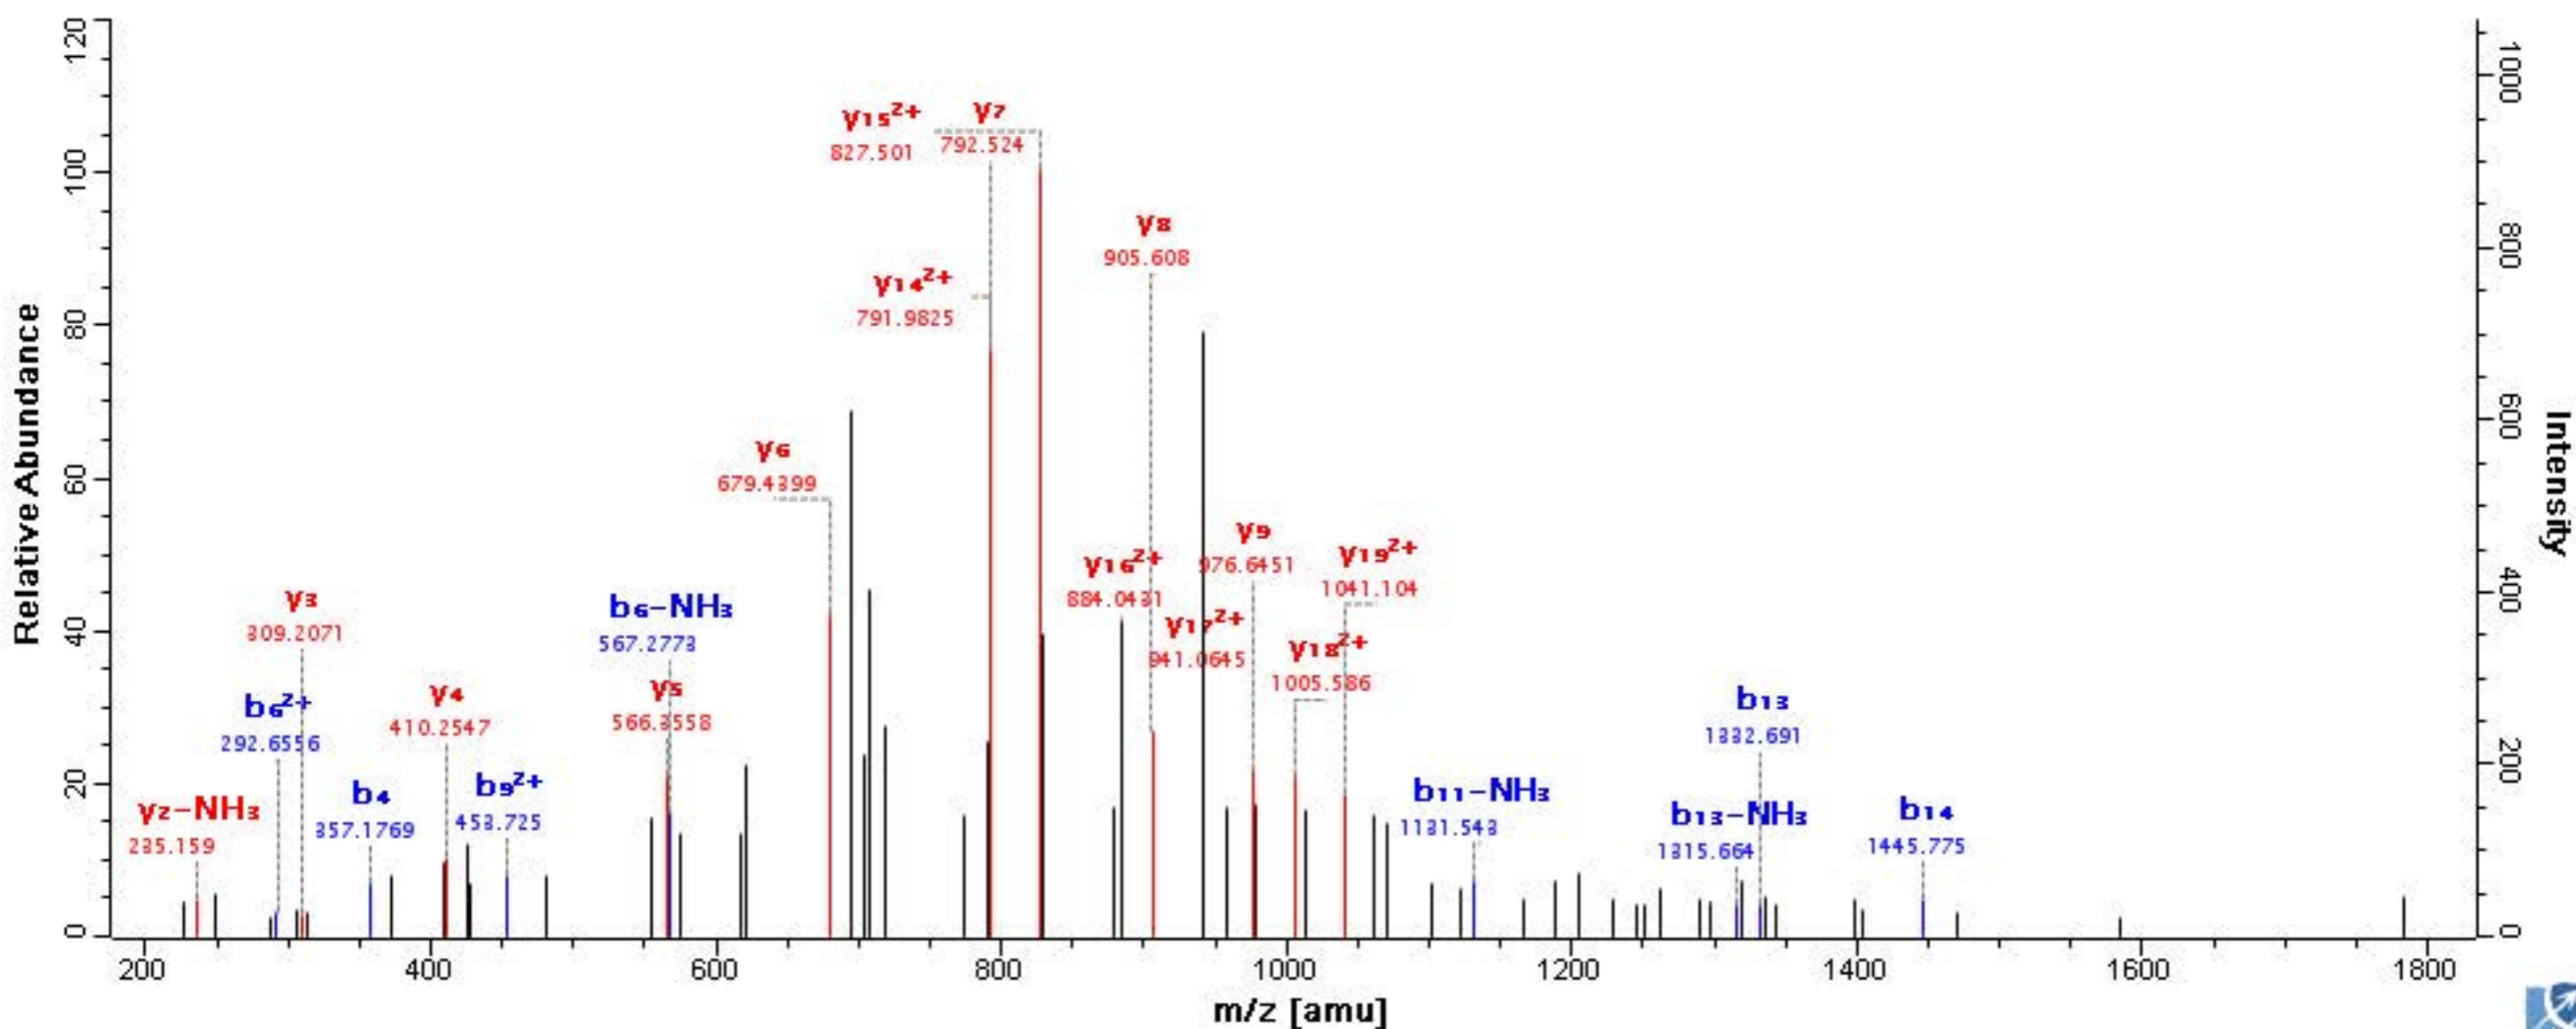

#### precursor information

|                   |                     |
|-------------------|---------------------|
| Mass:             | 2236.28046          |
| m/z:              | System.Collections. |
| Charge:           | System.Collections. |
| Retentiontime:    | System.Collections. |
| Score:            | 69.93452            |
| Mass Error [ppm]: | -1.6388             |
| PEP:              | 0.003439            |
| Precursor Type:   | ISO                 |

| b <sup>2+</sup> ion |          | b ion     |          |    |     |    | y ion    |           | y <sup>2+</sup> ion |           |
|---------------------|----------|-----------|----------|----|-----|----|----------|-----------|---------------------|-----------|
| Δ dalton            | mass     | Δ dalton  | mass     |    | seq |    | Δ dalton | mass      | Δ dalton            | mass      |
|                     | 100.0757 |           | 100.0757 | 1  | V   | 20 |          |           |                     |           |
|                     | 157.0972 |           | 157.0972 | 2  | G   | 19 | 2138.223 |           | 2138.223            |           |
|                     | 228.1343 |           | 228.1343 | 3  | A   | 18 | 2081.202 |           | 1041.104            | +0.475801 |
|                     | 357.1769 | -0.065899 | 357.1769 | 4  | E   | 17 | 2010.164 |           | 1005.586            | -0.080898 |
|                     | 471.2198 |           | 471.2198 | 5  | N   | 16 | 1881.122 |           | 941.0645            | -0.195466 |
| -0.444017           | 292.6556 |           | 584.3039 | 6  | I   | 15 | 1767.079 |           | 884.0431            | +0.036203 |
|                     | 655.341  |           | 655.341  | 7  | A   | 14 | 1653.995 |           | 827.501             | +0.341541 |
|                     | 769.3839 |           | 769.3839 | 8  | N   | 13 | 1582.958 |           | 791.9825            | +0.016103 |
| +0.332759           | 453.725  |           | 906.4428 | 9  | H   | 12 | 1468.915 |           | 1468.915            |           |
|                     | 1035.485 |           | 1035.485 | 10 | E   | 11 | 1331.856 |           | 1331.856            |           |
|                     | 1148.569 |           | 1148.569 | 11 | I   | 10 | 1202.813 |           | 1202.813            |           |
|                     | 1261.654 |           | 1261.654 | 12 | I   | 9  | 1089.729 |           | 1089.729            |           |
|                     | 1332.691 | +0.074252 | 1332.691 | 13 | A   | 8  | 976.6451 | +0.211358 | 976.6451            |           |
|                     | 1445.775 | +0.328445 | 1445.775 | 14 | I   | 7  | 905.608  | +0.111936 | 905.608             |           |
|                     | 1558.859 |           | 1558.859 | 15 | I   | 6  | 792.524  | +0.233537 | 792.524             |           |
|                     | 1671.943 |           | 1671.943 | 16 | I   | 5  | 679.4399 | +0.058201 | 679.4399            |           |
|                     | 1828.044 |           | 1828.044 | 17 | R   | 4  | 566.3558 | +0.111076 | 566.3558            |           |
|                     | 1929.092 |           | 1929.092 | 18 | T   | 3  | 410.2547 | +0.270598 | 410.2547            |           |
|                     | 1986.113 |           | 1986.113 | 19 | G   | 2  | 309.2071 | +0.141579 | 309.2071            |           |
|                     | 2087.161 |           | 2087.161 | 20 | T   | 1  | 252.1856 |           | 252.1856            |           |
|                     |          |           |          | 21 | K   | 0  | 151.1379 |           | 151.1379            |           |

#### general information

|                       |           |
|-----------------------|-----------|
| Annotation:           | 16 of 21  |
| AminoAcids Coverag    | 76 %      |
| Intensity Coverage:   | 40 %      |
| Protein Localisation: | 26 ... 46 |

Source: 20120521\_VR\_Bsu\_TripleSILACrep1\_L2ESLS\_OG\_F08  
 Scannumber: 6860  
 Protein: BSU05270; ydzF  
 Peptide Score: 138.9  
 Method: ITMS; CID; 3

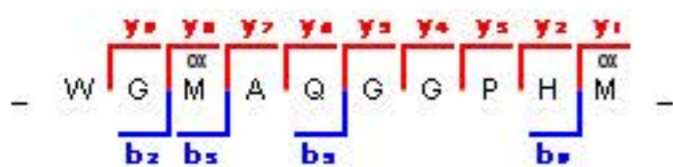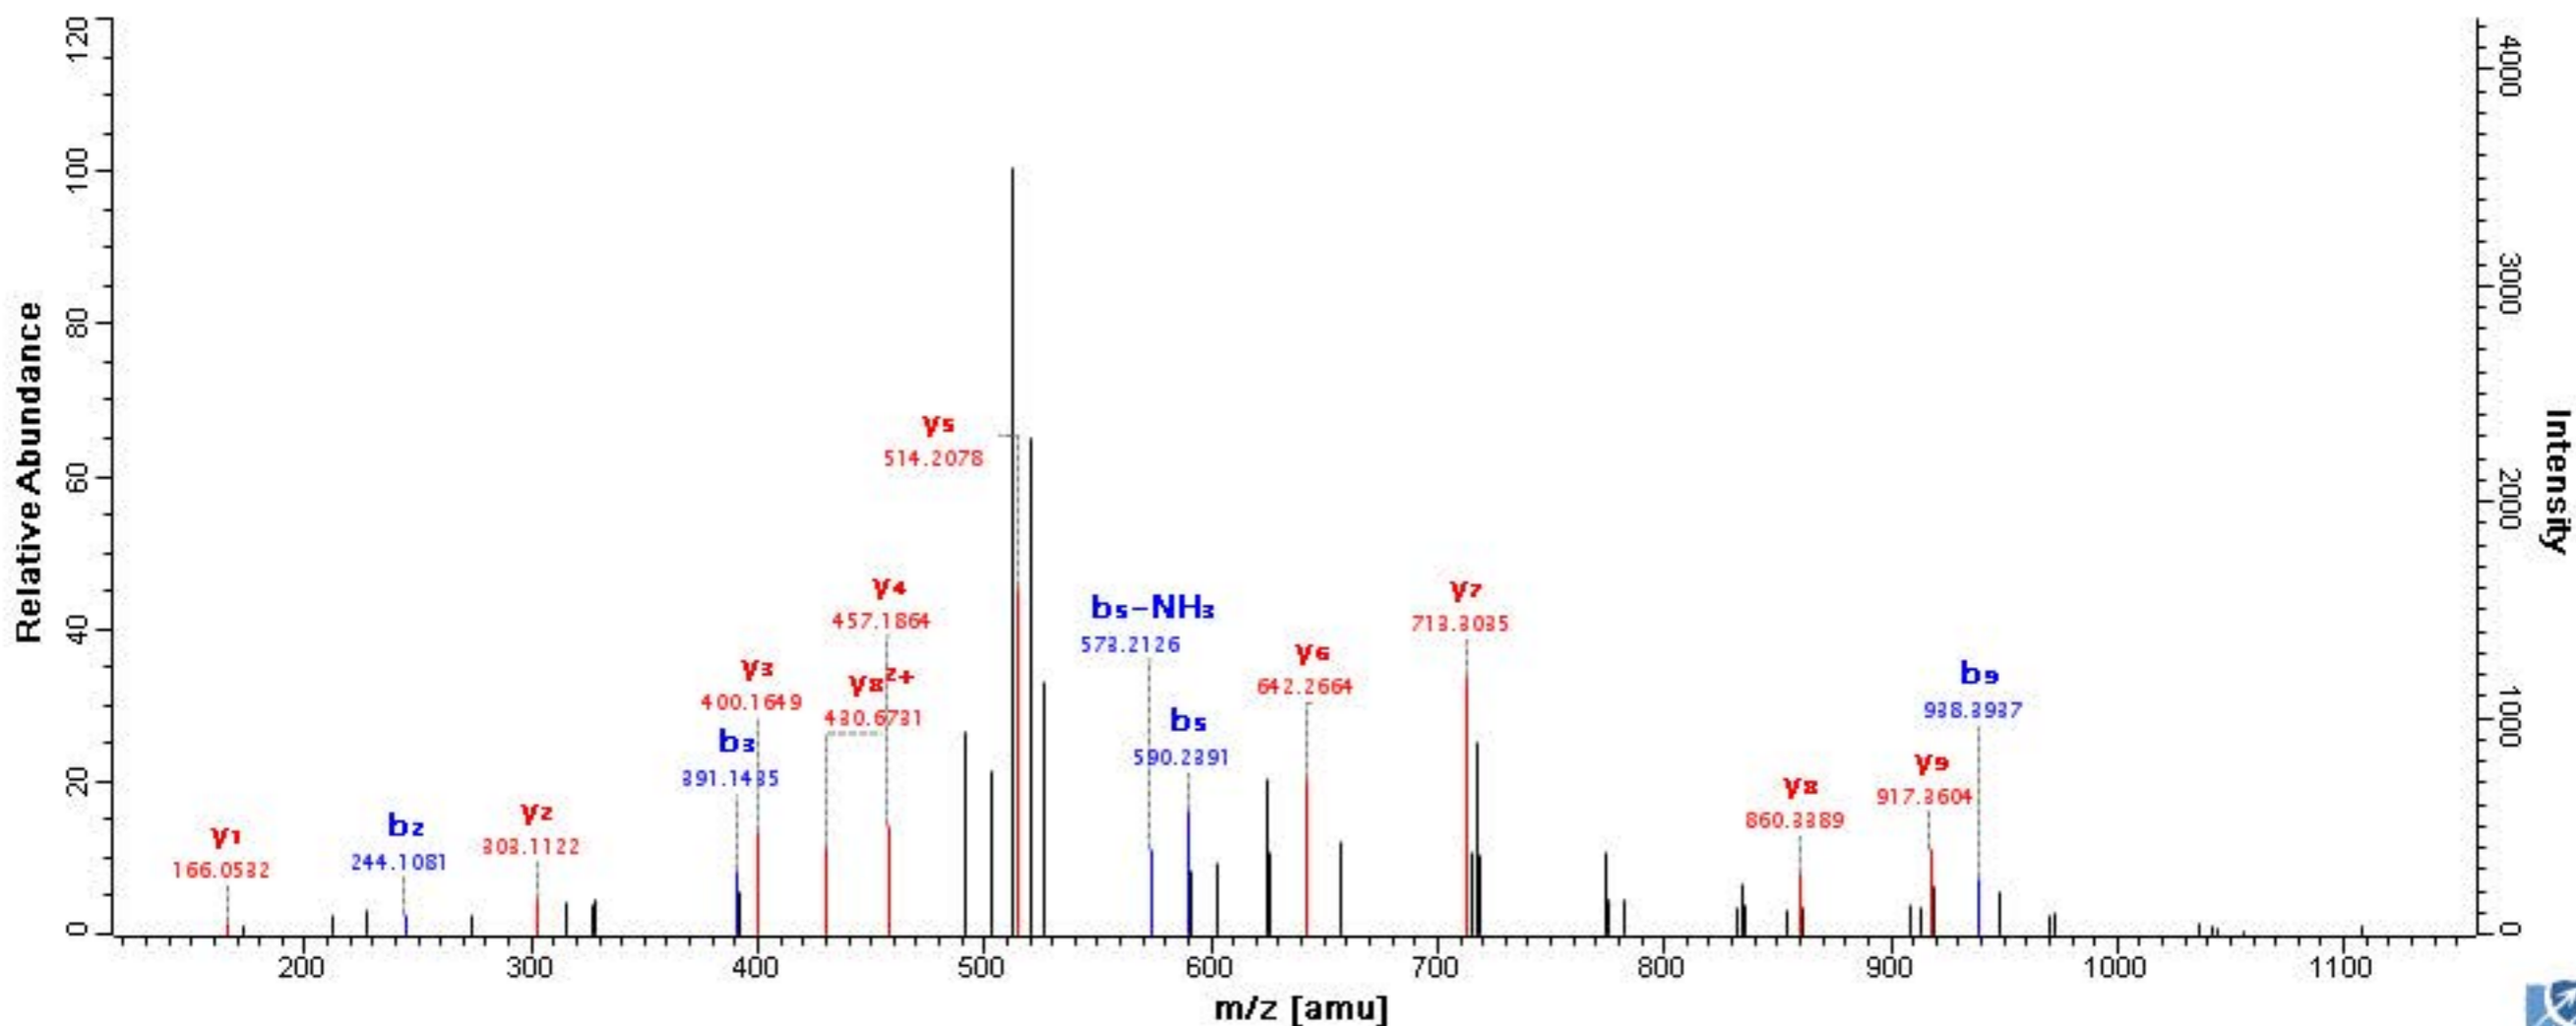

**precursor information**

|                   |                     |
|-------------------|---------------------|
| Mass:             | 1102.43237          |
| m/z:              | System.Collections. |
| Charge:           | System.Collections. |
| Retentiontime:    | System.Collections. |
| Score:            | 138.895             |
| Mass Error [ppm]: | -0.056646           |
| PEP:              | 0.00040015          |
| Precursor Type:   | ISO                 |

**general information**

|                       |             |
|-----------------------|-------------|
| Annotation:           | 9 of 10     |
| AminoAcids Coverage:  | 90 %        |
| Intensity Coverage:   | 32 %        |
| Protein Localisation: | 100 ... 109 |

| b ion      |              |    |     |   | y ion        |            | y <sup>2+</sup> ion |            |
|------------|--------------|----|-----|---|--------------|------------|---------------------|------------|
| Δ dalton   | mass         |    | seq |   | Δ dalton     | mass       | Δ dalton            | mass       |
|            | 187.08658942 | 1  | W   | 9 |              |            |                     |            |
| +0.2311955 | 244.10805314 | 2  | G   | 8 | 917.36039779 | +0.0812526 | 917.36039779        |            |
| -0.113362  | 391.14345237 | 3  | M   | 7 | 860.33893407 | +0.2230166 | 430.67310527        | -0.0028172 |
|            | 462.18056616 | 4  | A   | 6 | 713.30353484 | +0.0535208 | 713.30353484        |            |
| +0.0046918 | 590.23914367 | 5  | Q   | 5 | 642.26642105 | +0.0319798 | 642.26642105        |            |
|            | 647.26060739 | 6  | G   | 4 | 514.20784354 | +0.022198  | 514.20784354        |            |
|            | 704.28207112 | 7  | G   | 3 | 457.18637982 | +0.2150484 | 457.18637982        |            |
|            | 801.33483497 | 8  | P   | 2 | 400.1649161  | +0.2055673 | 400.1649161         |            |
| +0.1475129 | 938.39374683 | 9  | H   | 1 | 303.11215224 | +0.0712279 | 303.11215224        |            |
|            |              | 10 | M   | 0 | 166.05324038 | +0.0659613 | 166.05324038        |            |

Source: 20120521\_VR\_Bsu\_TripleSILACrep1\_L2ESLS\_OG\_F08  
 Scannumber: 7749  
 Protein: bltR; bmr2R; bmtR; BSU26580  
 Peptide Score: 100.88  
 Method: ITMS; CID; 3

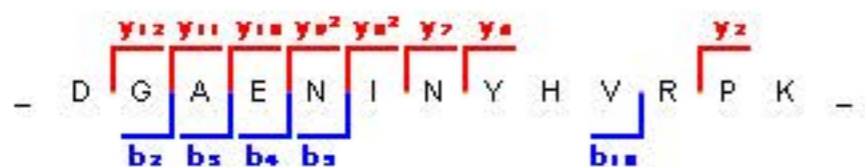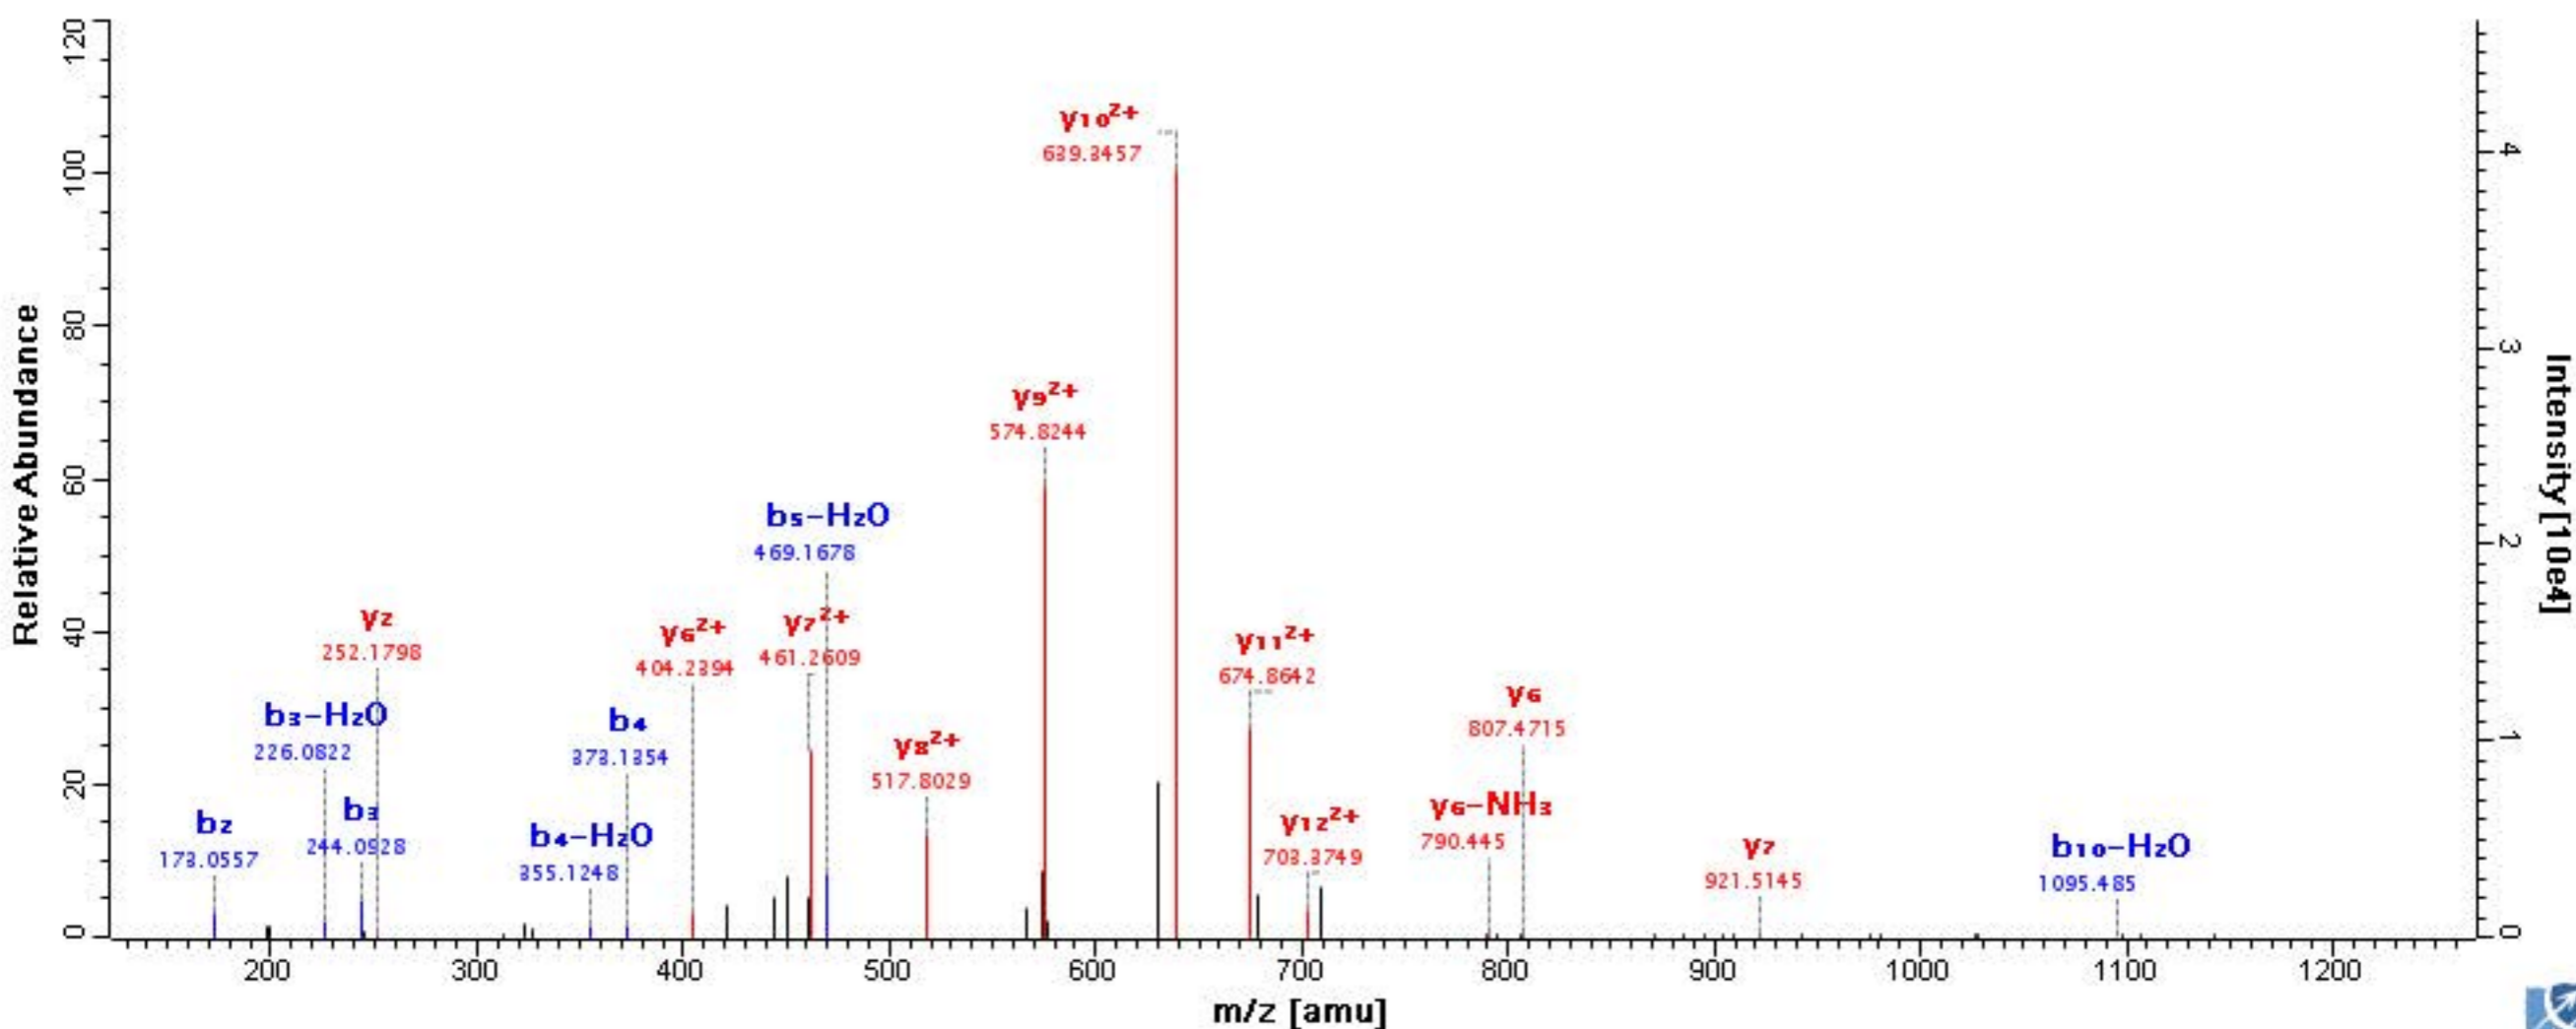

#### precursor information

|                   |                     |
|-------------------|---------------------|
| Mass:             | 1511.74687          |
| m/z:              | System.Collections. |
| Charge:           | System.Collections. |
| Retentiontime:    | System.Collections. |
| Score:            | 100.8783            |
| Mass Error [ppm]: | -0.80389            |
| PEP:              | 0.00097028          |
| Precursor Type:   | MULTI               |

#### general information

|                       |             |
|-----------------------|-------------|
| Annotation:           | 9 of 13     |
| AminoAcids Coverag    | 69 %        |
| Intensity Coverage:   | 73 %        |
| Protein Localisation: | 198 ... 210 |

| b ion      |              |    |     |    | γ ion        |            | γ <sup>2+</sup> ion |            |
|------------|--------------|----|-----|----|--------------|------------|---------------------|------------|
| Δ dalton   | mass         |    | seq |    | Δ dalton     | mass       | Δ dalton            | mass       |
|            | 116.0342195  | 1  | D   | 12 |              |            |                     |            |
| -0.082264  | 173.05568322 | 2  | G   | 11 | 1405.7426217 |            | 703.37494906        | +0.1168722 |
| -0.0512931 | 244.09279701 | 3  | A   | 10 | 1348.7211579 |            | 674.8642172         | +0.3215128 |
| +0.0675518 | 373.13539011 | 4  | E   | 9  | 1277.6840442 |            | 639.34566031        | +0.2236146 |
|            | 487.17831755 | 5  | N   | 8  | 1148.6414511 |            | 574.82436376        | +0.1949844 |
|            | 600.26238153 | 6  | I   | 7  | 1034.5985236 |            | 517.80290004        | +0.2130912 |
|            | 714.30530898 | 7  | N   | 6  | 921.51445963 | +0.1565609 | 461.26086805        | +0.2232628 |
|            | 877.36863752 | 8  | Y   | 5  | 807.47153218 | +0.2975108 | 404.23940432        | -0.0654541 |
|            | 1014.4275494 | 9  | H   | 4  | 644.40820364 |            | 644.40820364        |            |
|            | 1113.4959633 | 10 | V   | 3  | 507.34929178 |            | 507.34929178        |            |
|            | 1269.5970743 | 11 | R   | 2  | 408.28087786 |            | 408.28087786        |            |
|            | 1366.6498382 | 12 | P   | 1  | 252.17976684 | -0.0337707 | 252.17976684        |            |
|            |              | 13 | K   | 0  | 155.12700298 |            | 155.12700298        |            |

Source: 20120521\_VR\_Bsu\_TripleSILACrep1\_L2ESLS\_OG\_F09  
 Scannumber: 11188  
 Protein: BSU34960; yvoF  
 Peptide Score: 105.65  
 Method: ITMS; CID; 3

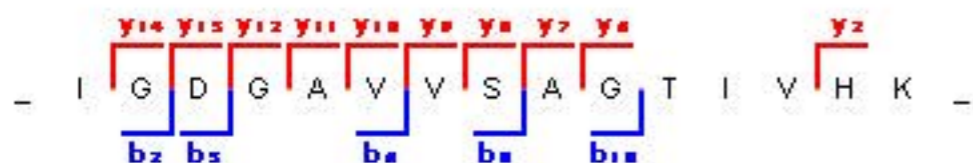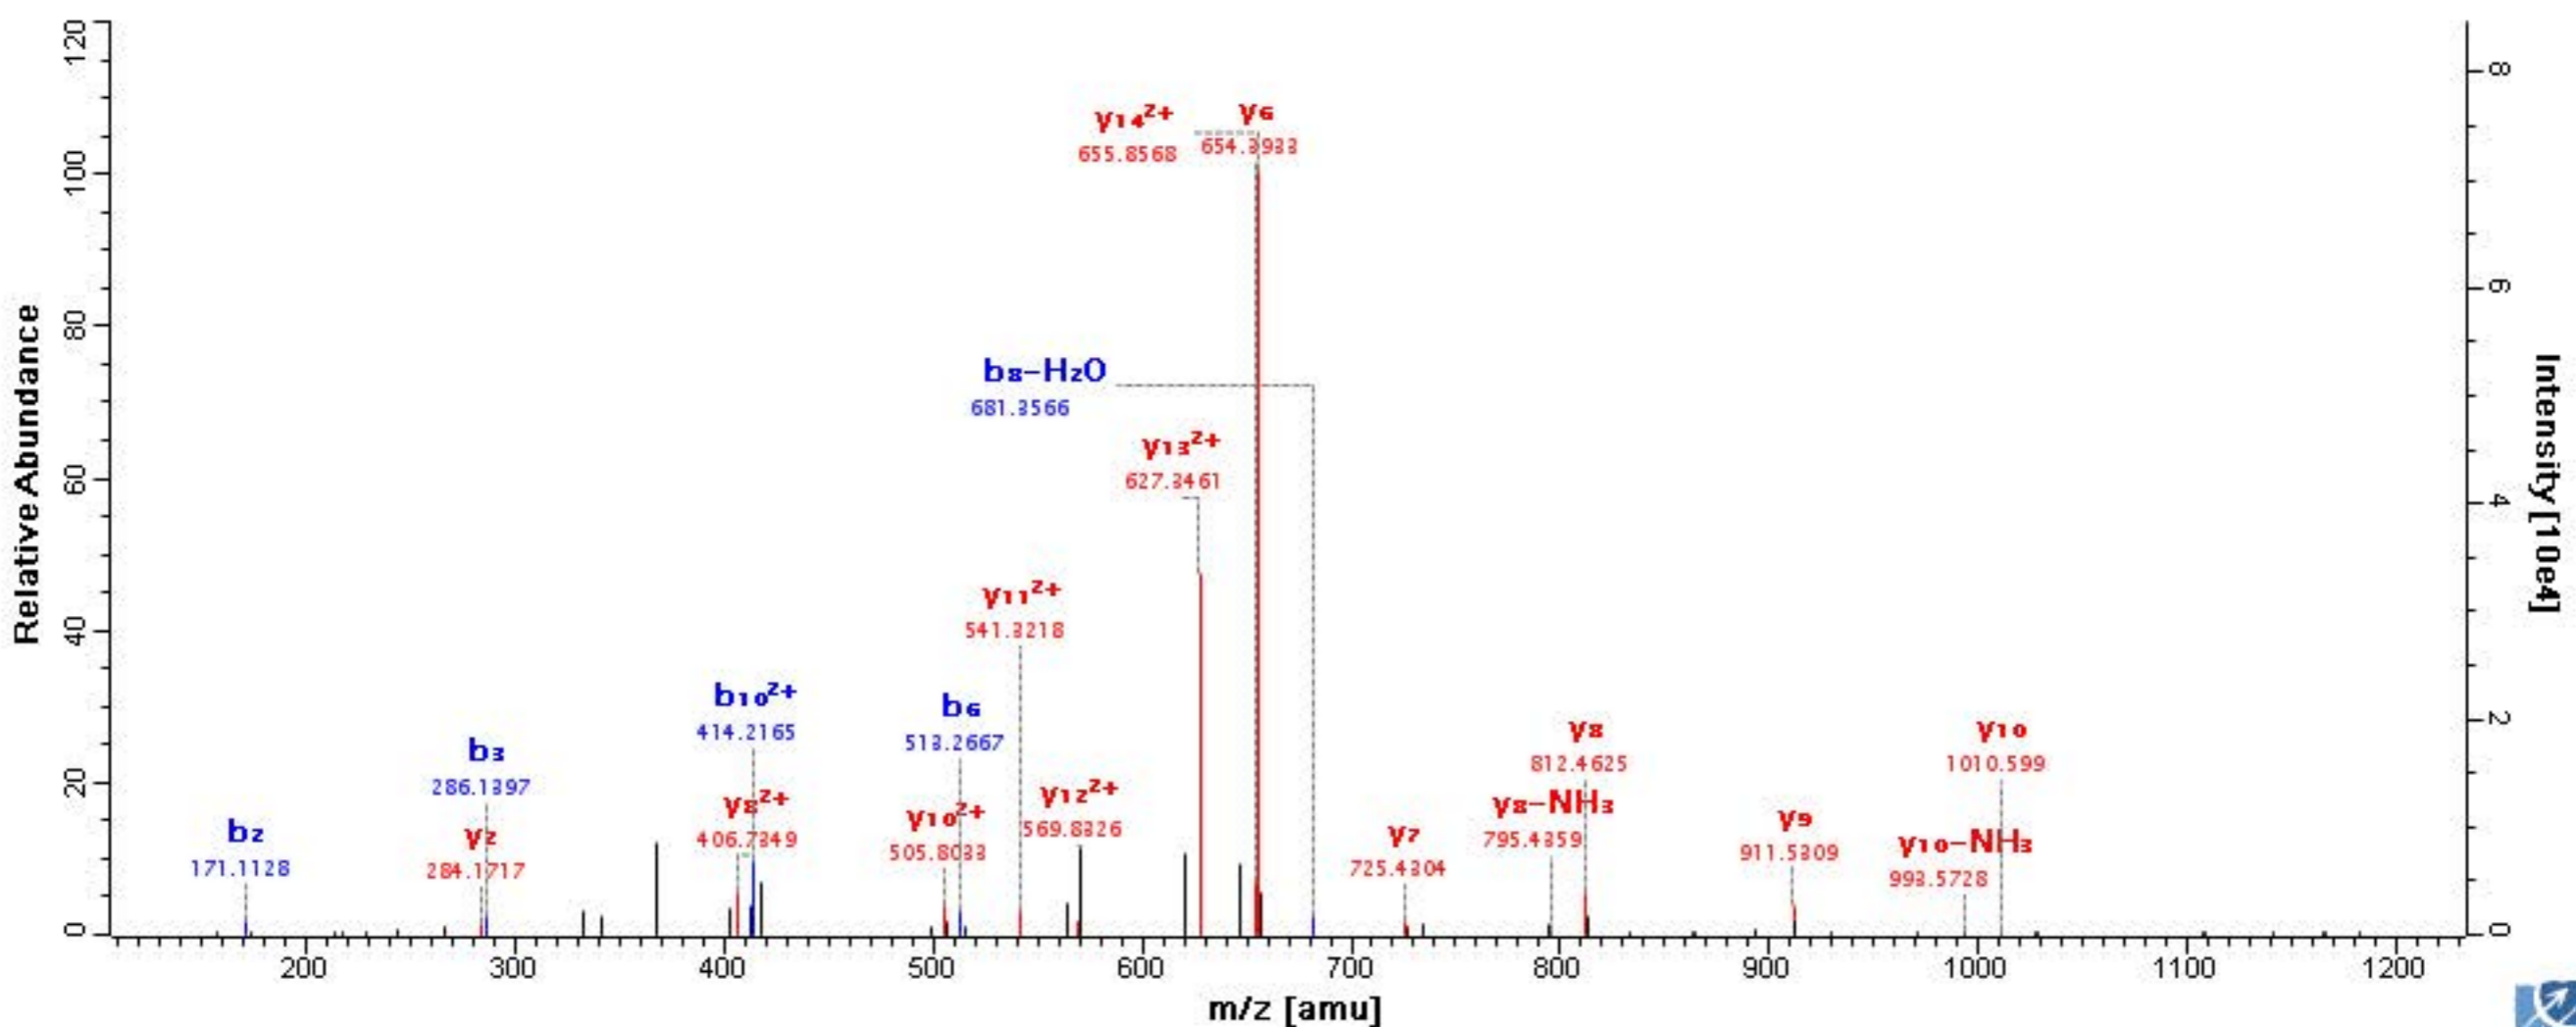

**precursor information**

|                   |                     |
|-------------------|---------------------|
| Mass:             | 1422.78371          |
| m/z:              | System.Collections. |
| Charge:           | System.Collections. |
| Retentiontime:    | System.Collections. |
| Score:            | 105.649             |
| Mass Error [ppm]: | 0.44105             |
| PEP:              | 7.7158E-05          |
| Precursor Type:   | MULTI               |

**general information**

|                       |             |
|-----------------------|-------------|
| Annotation:           | 10 of 15    |
| AminoAcids Coverag    | 67 %        |
| Intensity Coverage:   | 69 %        |
| Protein Localisation: | 127 ... 141 |

| b <sup>2+</sup> ion |          | b ion     |          |     | γ ion |          | γ <sup>2+</sup> ion |           |           |           |
|---------------------|----------|-----------|----------|-----|-------|----------|---------------------|-----------|-----------|-----------|
| Δ dalton            | mass     | Δ dalton  | mass     | seq |       | Δ dalton | mass                | Δ dalton  | mass      |           |
|                     | 114.0913 |           | 114.0913 | 1   | I     | 14       |                     |           |           |           |
|                     | 171.1128 | +0.127995 | 171.1128 | 2   | G     | 13       | 1310.706            | 655.8568  | +0.265043 |           |
|                     | 286.1397 | -0.051612 | 286.1397 | 3   | D     | 12       | 1253.685            | 627.3461  | +0.277972 |           |
|                     | 343.1612 |           | 343.1612 | 4   | G     | 11       | 1138.658            | 569.8326  | -0.175537 |           |
|                     | 414.1983 |           | 414.1983 | 5   | A     | 10       | 1081.636            | 541.3218  | +0.350698 |           |
|                     | 513.2667 | +0.147202 | 513.2667 | 6   | V     | 9        | 1010.599            | +0.090879 | 505.8033  | +0.076164 |
|                     | 612.3352 |           | 612.3352 | 7   | V     | 8        | 911.5309            | +0.258781 | 911.5309  |           |
|                     | 699.3672 |           | 699.3672 | 8   | S     | 7        | 812.4625            | +0.106247 | 406.7349  | +0.165574 |
|                     | 770.4043 |           | 770.4043 | 9   | A     | 6        | 725.4304            | +0.084443 | 725.4304  |           |
| +0.013524           | 414.2165 |           | 827.4258 | 10  | G     | 5        | 654.3933            | +0.048986 | 654.3933  |           |
|                     | 928.4734 |           | 928.4734 | 11  | T     | 4        | 597.3719            |           | 597.3719  |           |
|                     | 1041.558 |           | 1041.558 | 12  | I     | 3        | 496.3242            |           | 496.3242  |           |
|                     | 1140.626 |           | 1140.626 | 13  | V     | 2        | 383.2401            |           | 383.2401  |           |
|                     | 1277.685 |           | 1277.685 | 14  | H     | 1        | 284.1717            | +0.078559 | 284.1717  |           |
|                     |          |           |          | 15  | K     | 0        | 147.1128            |           | 147.1128  |           |

Source: 20120521\_VR\_Bsu\_TripleSILACrep1\_L2ESLS\_OG\_F10  
 Scannumber: 10195  
 Protein: BSU26060; yqbM; BSU12660; xkdM  
 Peptide Score: 92.19  
 Method: ITMS; CID; 3

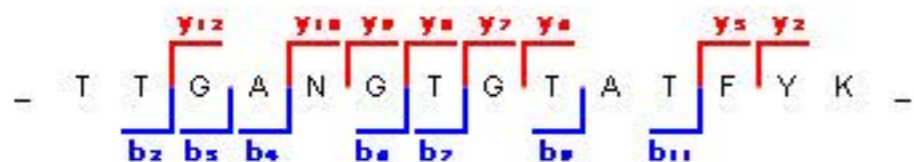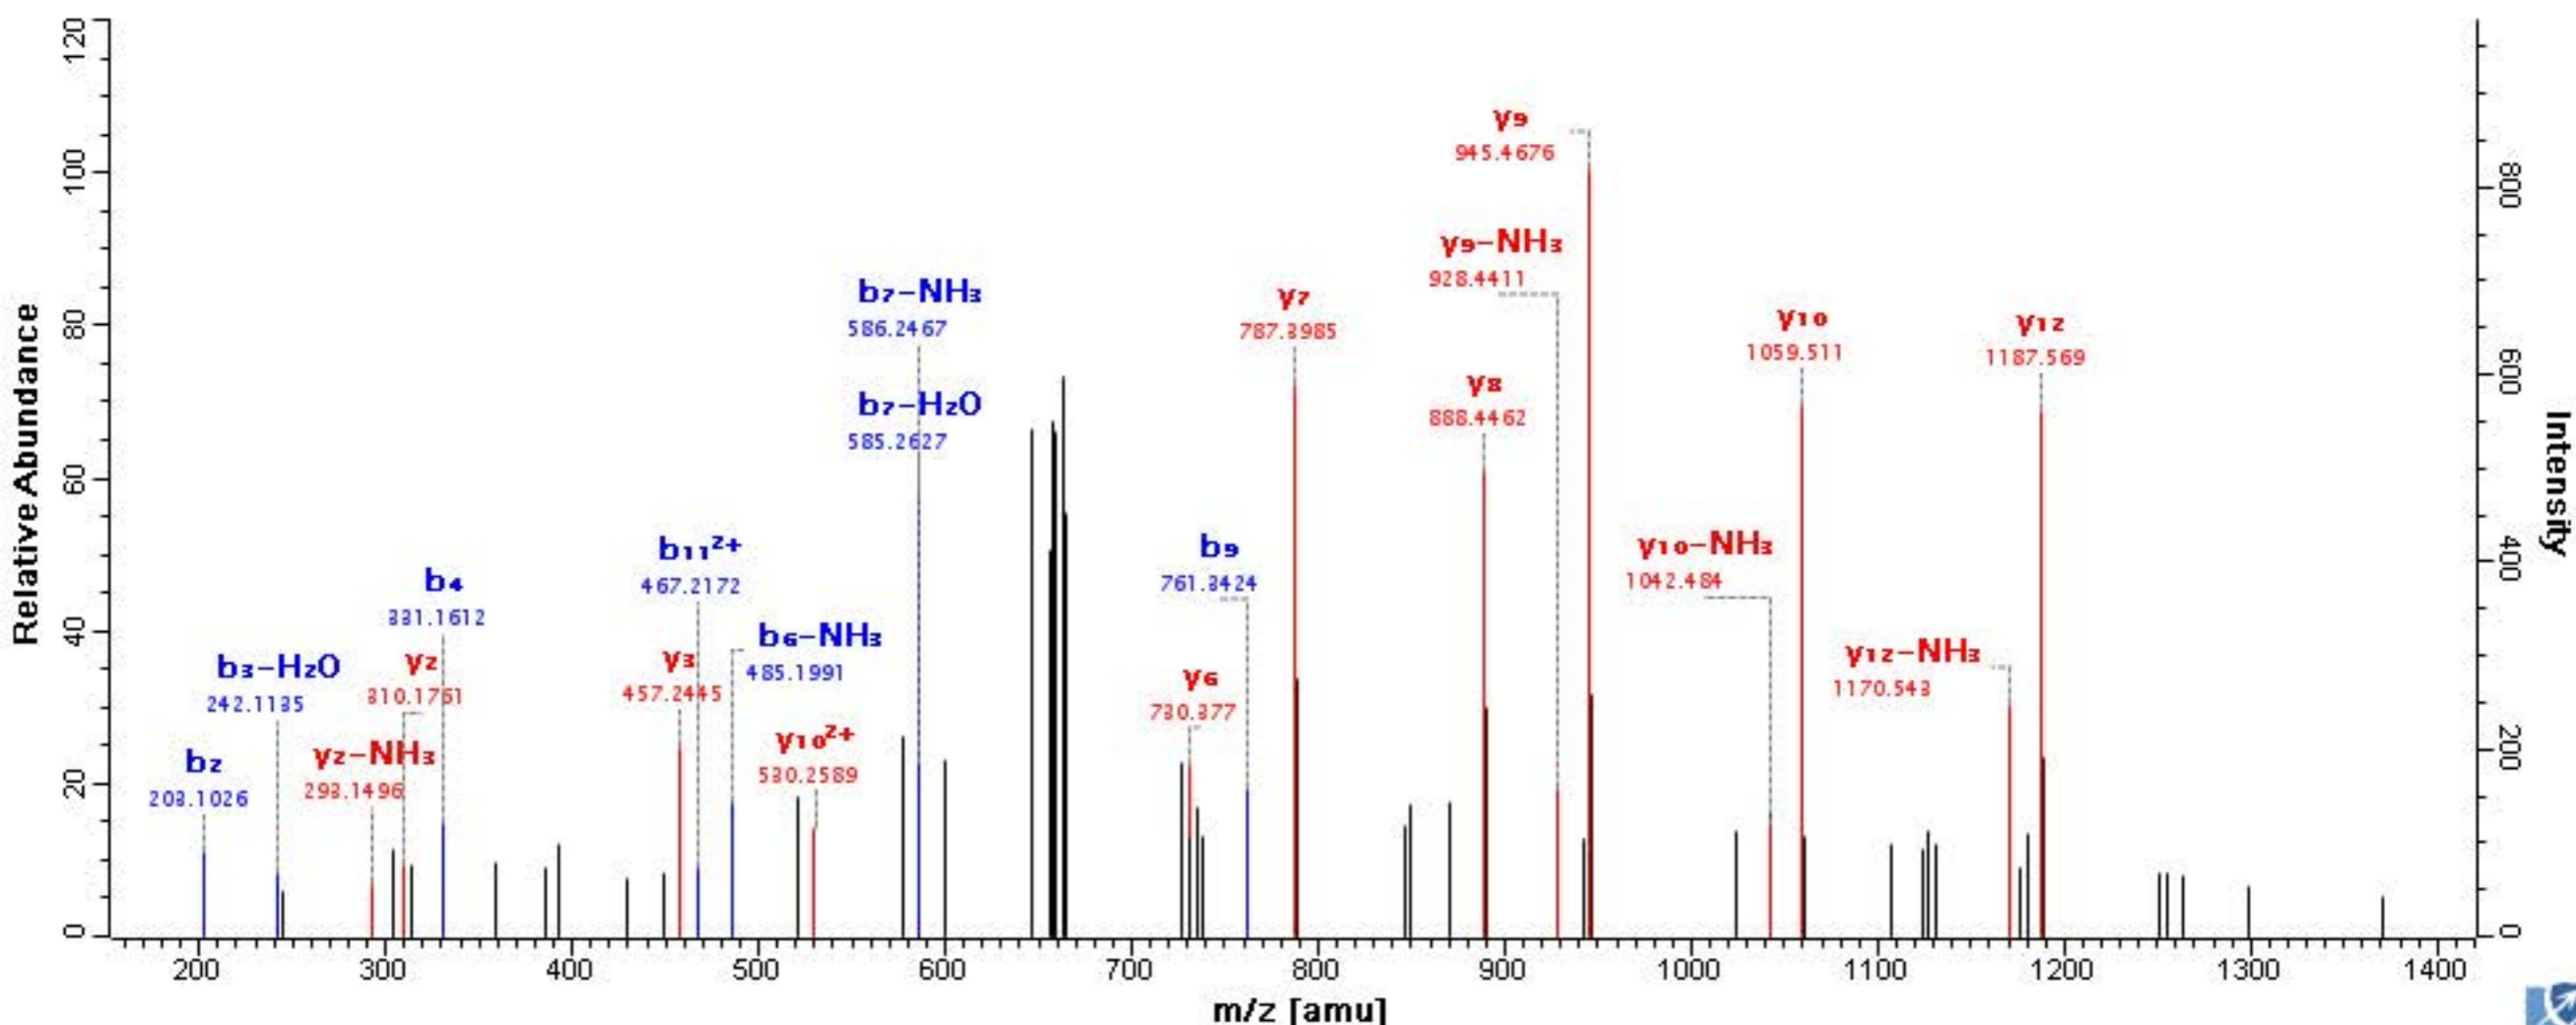

#### precursor information

|                   |                     |
|-------------------|---------------------|
| Mass:             | 1388.65686          |
| m/z:              | System.Collections. |
| Charge:           | System.Collections. |
| Retentiontime:    | System.Collections. |
| Score:            | 92.18982            |
| Mass Error [ppm]: | -0.25412            |
| PEP:              | 0.00029799          |
| Precursor Type:   | MULTI               |

#### general information

|                       |           |
|-----------------------|-----------|
| Annotation:           | 11 of 14  |
| AminoAcids Coverage:  | 79 %      |
| Intensity Coverage:   | 42 %      |
| Protein Localisation: | 52 ... 65 |

| b <sup>2+</sup> ion |          | b ion     |          | seq |   |    | y ion    |           | y <sup>2+</sup> ion |           |
|---------------------|----------|-----------|----------|-----|---|----|----------|-----------|---------------------|-----------|
| Δ dalton            | mass     | Δ dalton  | mass     |     |   |    | Δ dalton | mass      | Δ dalton            | mass      |
|                     | 102.055  |           | 102.055  | 1   | T | 13 |          |           |                     |           |
|                     | 203.1026 | +0.024915 | 203.1026 | 2   | T | 12 | 1288.617 |           | 1288.617            |           |
|                     | 260.1241 |           | 260.1241 | 3   | G | 11 | 1187.569 | +0.016443 | 1187.569            |           |
|                     | 331.1612 | +0.086775 | 331.1612 | 4   | A | 10 | 1130.548 |           | 1130.548            |           |
|                     | 445.2041 |           | 445.2041 | 5   | N | 9  | 1059.511 | -0.207328 | 530.2589            | -0.148379 |
|                     | 502.2256 |           | 502.2256 | 6   | G | 8  | 945.4676 | +0.169462 | 945.4676            |           |
|                     | 603.2733 |           | 603.2733 | 7   | T | 7  | 888.4462 | +0.198555 | 888.4462            |           |
|                     | 660.2947 |           | 660.2947 | 8   | G | 6  | 787.3985 | +0.22774  | 787.3985            |           |
|                     | 761.3424 | +0.264633 | 761.3424 | 9   | T | 5  | 730.377  | +0.198239 | 730.377             |           |
|                     | 832.3795 |           | 832.3795 | 10  | A | 4  | 629.3293 |           | 629.3293            |           |
| +0.124002           | 467.2172 |           | 933.4272 | 11  | T | 3  | 558.2922 |           | 558.2922            |           |
|                     | 1080.496 |           | 1080.496 | 12  | F | 2  | 457.2445 | +0.075644 | 457.2445            |           |
|                     | 1243.559 |           | 1243.559 | 13  | Y | 1  | 310.1761 | +0.049331 | 310.1761            |           |
|                     |          |           |          | 14  | K | 0  | 147.1128 |           | 147.1128            |           |



Source: 20120521\_VR\_Bsu\_TripleSILACrep1\_L2ESLS\_OG\_F10  
 Scannumber: 12623  
 Protein: BSU16870; ymf1  
 Peptide Score: 84.61  
 Method: ITMS; CID; 3

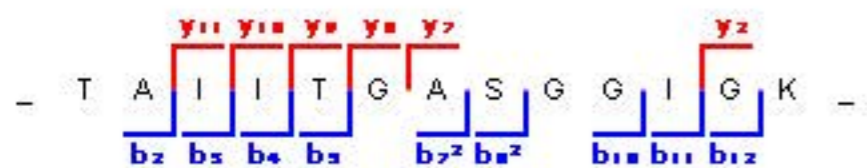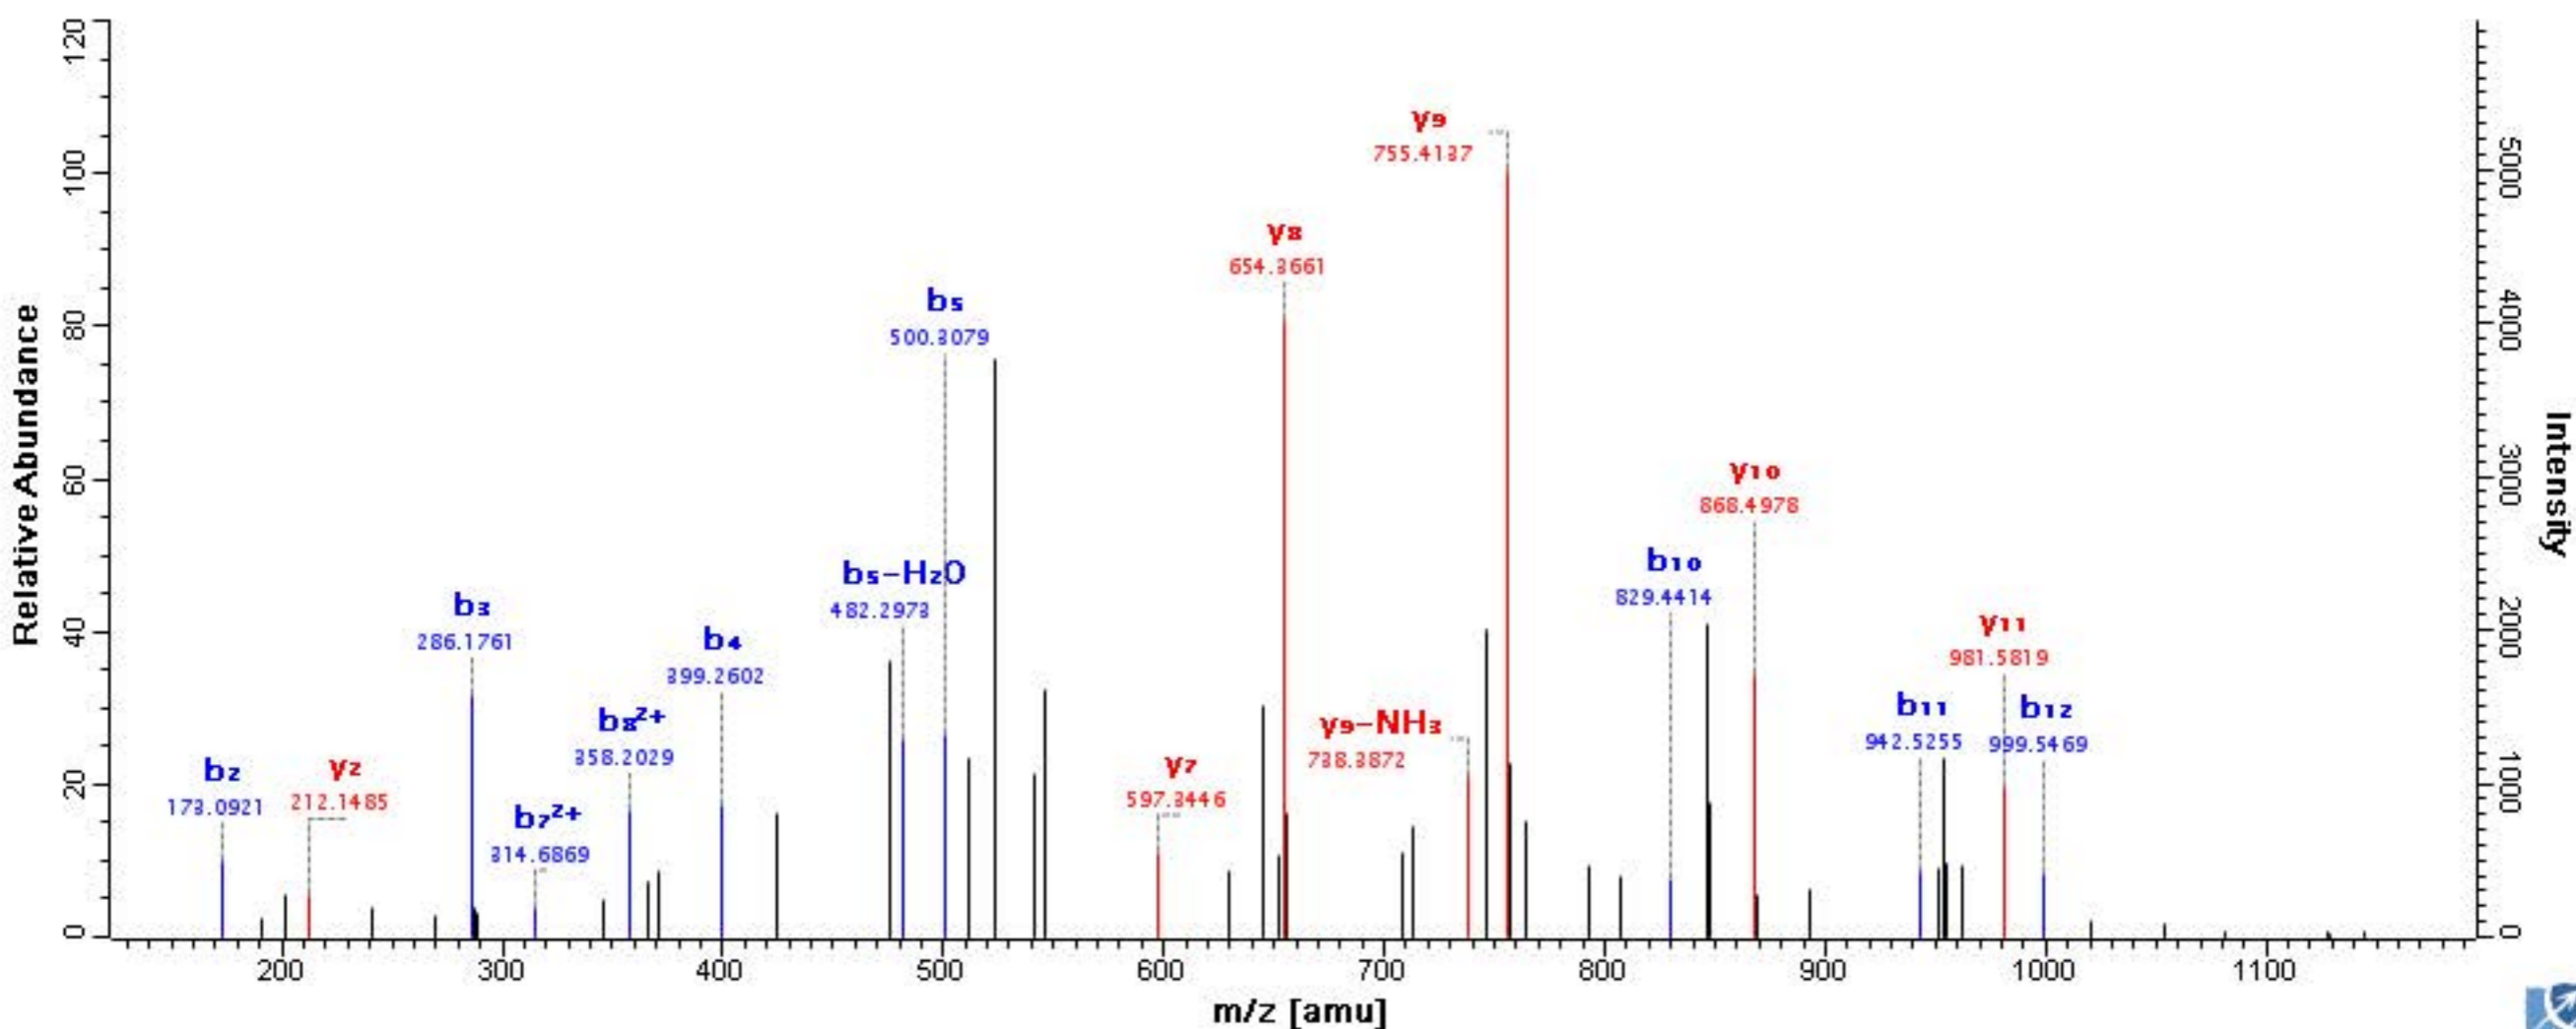

#### precursor information

|                   |                     |
|-------------------|---------------------|
| Mass:             | 1144.64437          |
| m/z:              | System.Collections. |
| Charge:           | System.Collections. |
| Retentiontime:    | System.Collections. |
| Score:            | 84.60506            |
| Mass Error [ppm]: | -0.71291            |
| PEP:              | 0.0030795           |
| Precursor Type:   | MULTI               |

#### general information

|                       |          |
|-----------------------|----------|
| Annotation:           | 10 of 13 |
| AminoAcids Coverag    | 77 %     |
| Intensity Coverage:   | 43 %     |
| Protein Localisation: | 4 ... 16 |

| $b^{2+}$ ion    |              | b ion           |              |     | y ion |                 |              |            |
|-----------------|--------------|-----------------|--------------|-----|-------|-----------------|--------------|------------|
| $\Delta$ dalton | mass         | $\Delta$ dalton | mass         | seq |       | $\Delta$ dalton | mass         |            |
|                 | 102.05495494 |                 | 102.05495494 | 1   | T     | 12              |              |            |
|                 | 173.09206873 | -0.1327639      | 173.09206873 | 2   | A     | 11              | 1052.6189843 |            |
|                 | 286.17613271 | -0.1179662      | 286.17613271 | 3   | I     | 10              | 981.58187049 | +0.1121603 |
|                 | 399.26019669 | -0.0093422      | 399.26019669 | 4   | I     | 9               | 868.49780651 | +0.0198326 |
|                 | 500.30787516 | +0.0124373      | 500.30787516 | 5   | T     | 8               | 755.41374253 | -0.0046849 |
|                 | 557.32933889 |                 | 557.32933889 | 6   | G     | 7               | 654.36606406 | +0.0485478 |
| +0.3866218      | 314.68686457 |                 | 628.36645267 | 7   | A     | 6               | 597.34460033 | +0.2238201 |
| -0.053953       | 358.20287878 |                 | 715.39848108 | 8   | S     | 5               | 526.30748654 |            |
|                 | 772.41994481 |                 | 772.41994481 | 9   | G     | 4               | 439.27545813 |            |
|                 | 829.44140853 | +0.0259377      | 829.44140853 | 10  | G     | 3               | 382.25399441 |            |
|                 | 942.52547251 | +0.0182897      | 942.52547251 | 11  | I     | 2               | 325.23253069 |            |
|                 | 999.54693624 | +0.1033934      | 999.54693624 | 12  | G     | 1               | 212.14846671 | +0.0247511 |
|                 |              |                 |              | 13  | K     | 0               | 155.12700298 |            |

Source: 20120521\_VR\_Bsu\_TripleSILACrep1\_L2ESLS\_OG\_F10  
 Scannumber: 18438  
 Protein: BSU38620; yxU  
 Peptide Score: 138.98  
 Method: ITMS; CID; 3

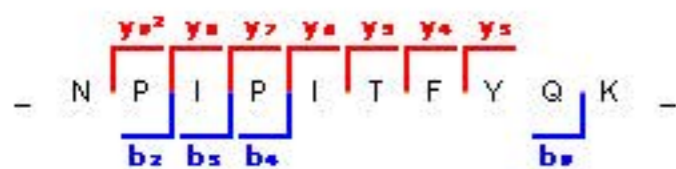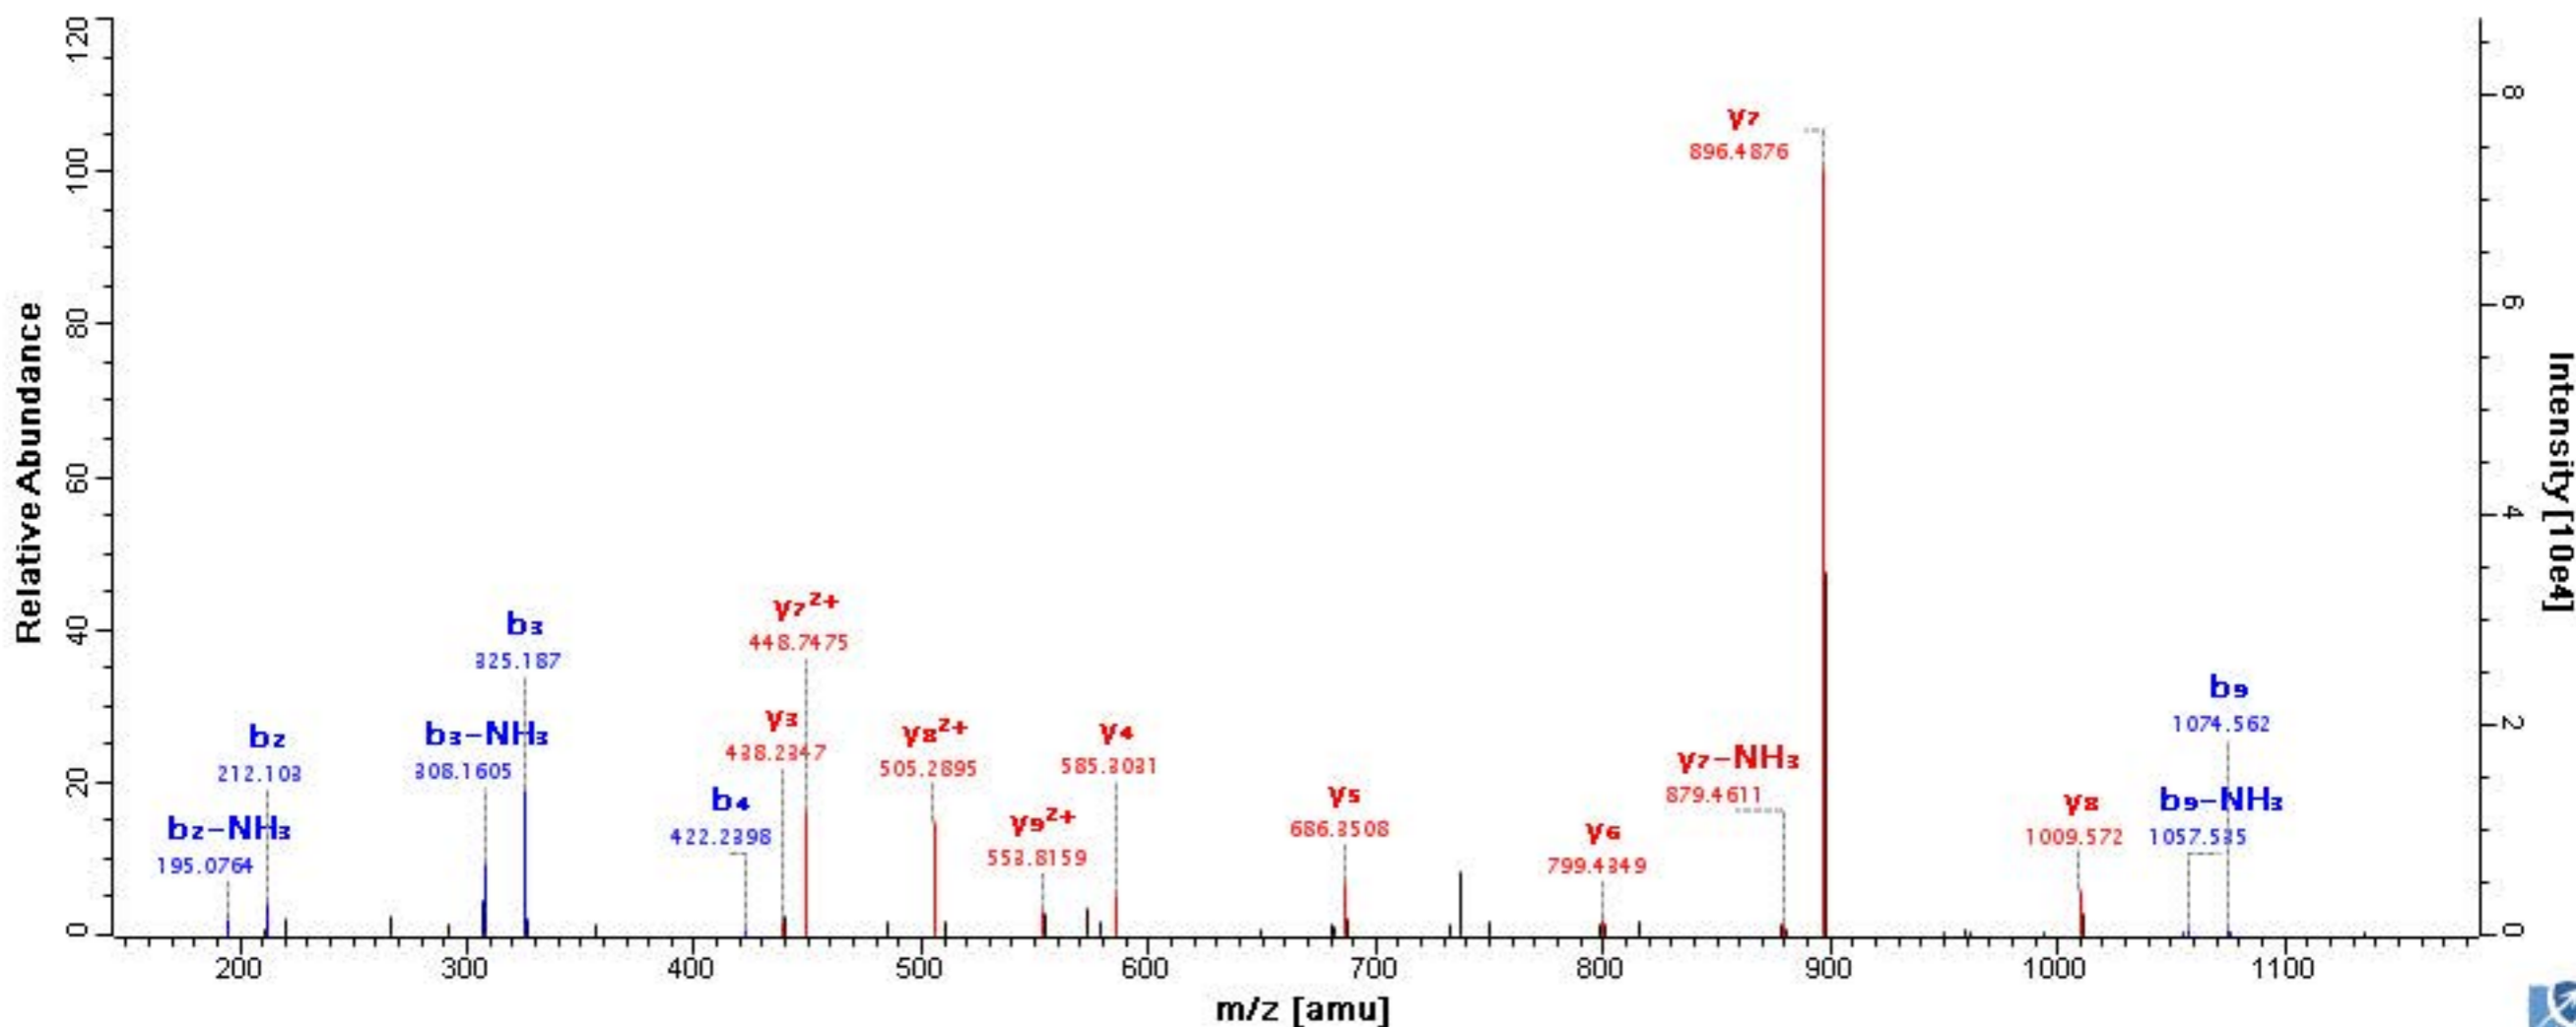

#### precursor information

|                   |                     |
|-------------------|---------------------|
| Mass:             | 1219.66043          |
| m/z:              | System.Collections. |
| Charge:           | System.Collections. |
| Retentiontime:    | System.Collections. |
| Score:            | 138.9753            |
| Mass Error [ppm]: | 0.26206             |
| PEP:              | 1.9343E-06          |
| Precursor Type:   | MULTI               |

#### general information

|                       |          |
|-----------------------|----------|
| Annotation:           | 8 of 10  |
| AminoAcids Coverage:  | 80 %     |
| Intensity Coverage:   | 65 %     |
| Protein Localisation: | 6 ... 15 |

| b ion      |              |    |     |   | γ ion        |            | γ <sup>2+</sup> ion |            |
|------------|--------------|----|-----|---|--------------|------------|---------------------|------------|
| Δ dalton   | mass         |    | seq |   | Δ dalton     | mass       | Δ dalton            | mass       |
|            | 115.05020391 | 1  | N   | 9 |              |            |                     |            |
| +0.0101609 | 212.10296777 | 2  | P   | 8 | 1106.6244583 |            | 553.81586737        | +0.0446063 |
| +0.081706  | 325.18703175 | 3  | I   | 7 | 1009.5716944 | +0.0918798 | 505.28948545        | +0.1543012 |
| +0.2501336 | 422.2397956  | 4  | P   | 6 | 896.48763044 | +0.1014198 | 448.74745345        | +0.2123244 |
|            | 535.32385958 | 5  | I   | 5 | 799.43486659 | +0.1830533 | 799.43486659        |            |
|            | 636.37153805 | 6  | T   | 4 | 686.35080261 | +0.0112579 | 686.35080261        |            |
|            | 783.43995197 | 7  | F   | 3 | 585.30312414 | +0.0345223 | 585.30312414        |            |
|            | 946.50328051 | 8  | Y   | 2 | 438.23471022 | +0.1959538 | 438.23471022        |            |
| +0.1250316 | 1074.561858  | 9  | Q   | 1 | 275.17138168 |            | 275.17138168        |            |
|            |              | 10 | K   | 0 | 147.11280417 |            | 147.11280417        |            |

Source: 20120521\_VR\_Bsu\_TripleSILACrep1\_L2ESLS\_OG\_F10  
 Scannumber: 19004  
 Protein: BSU06900; cotJB  
 Peptide Score: 132.51  
 Method: ITMS; CID; 3

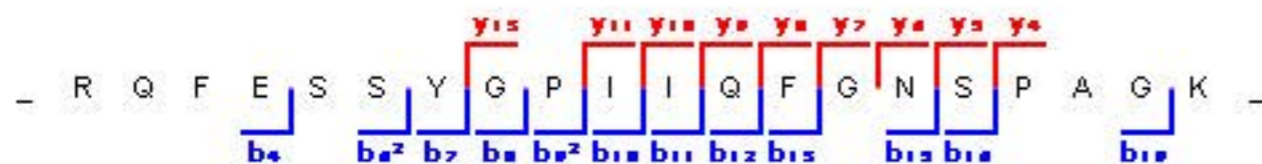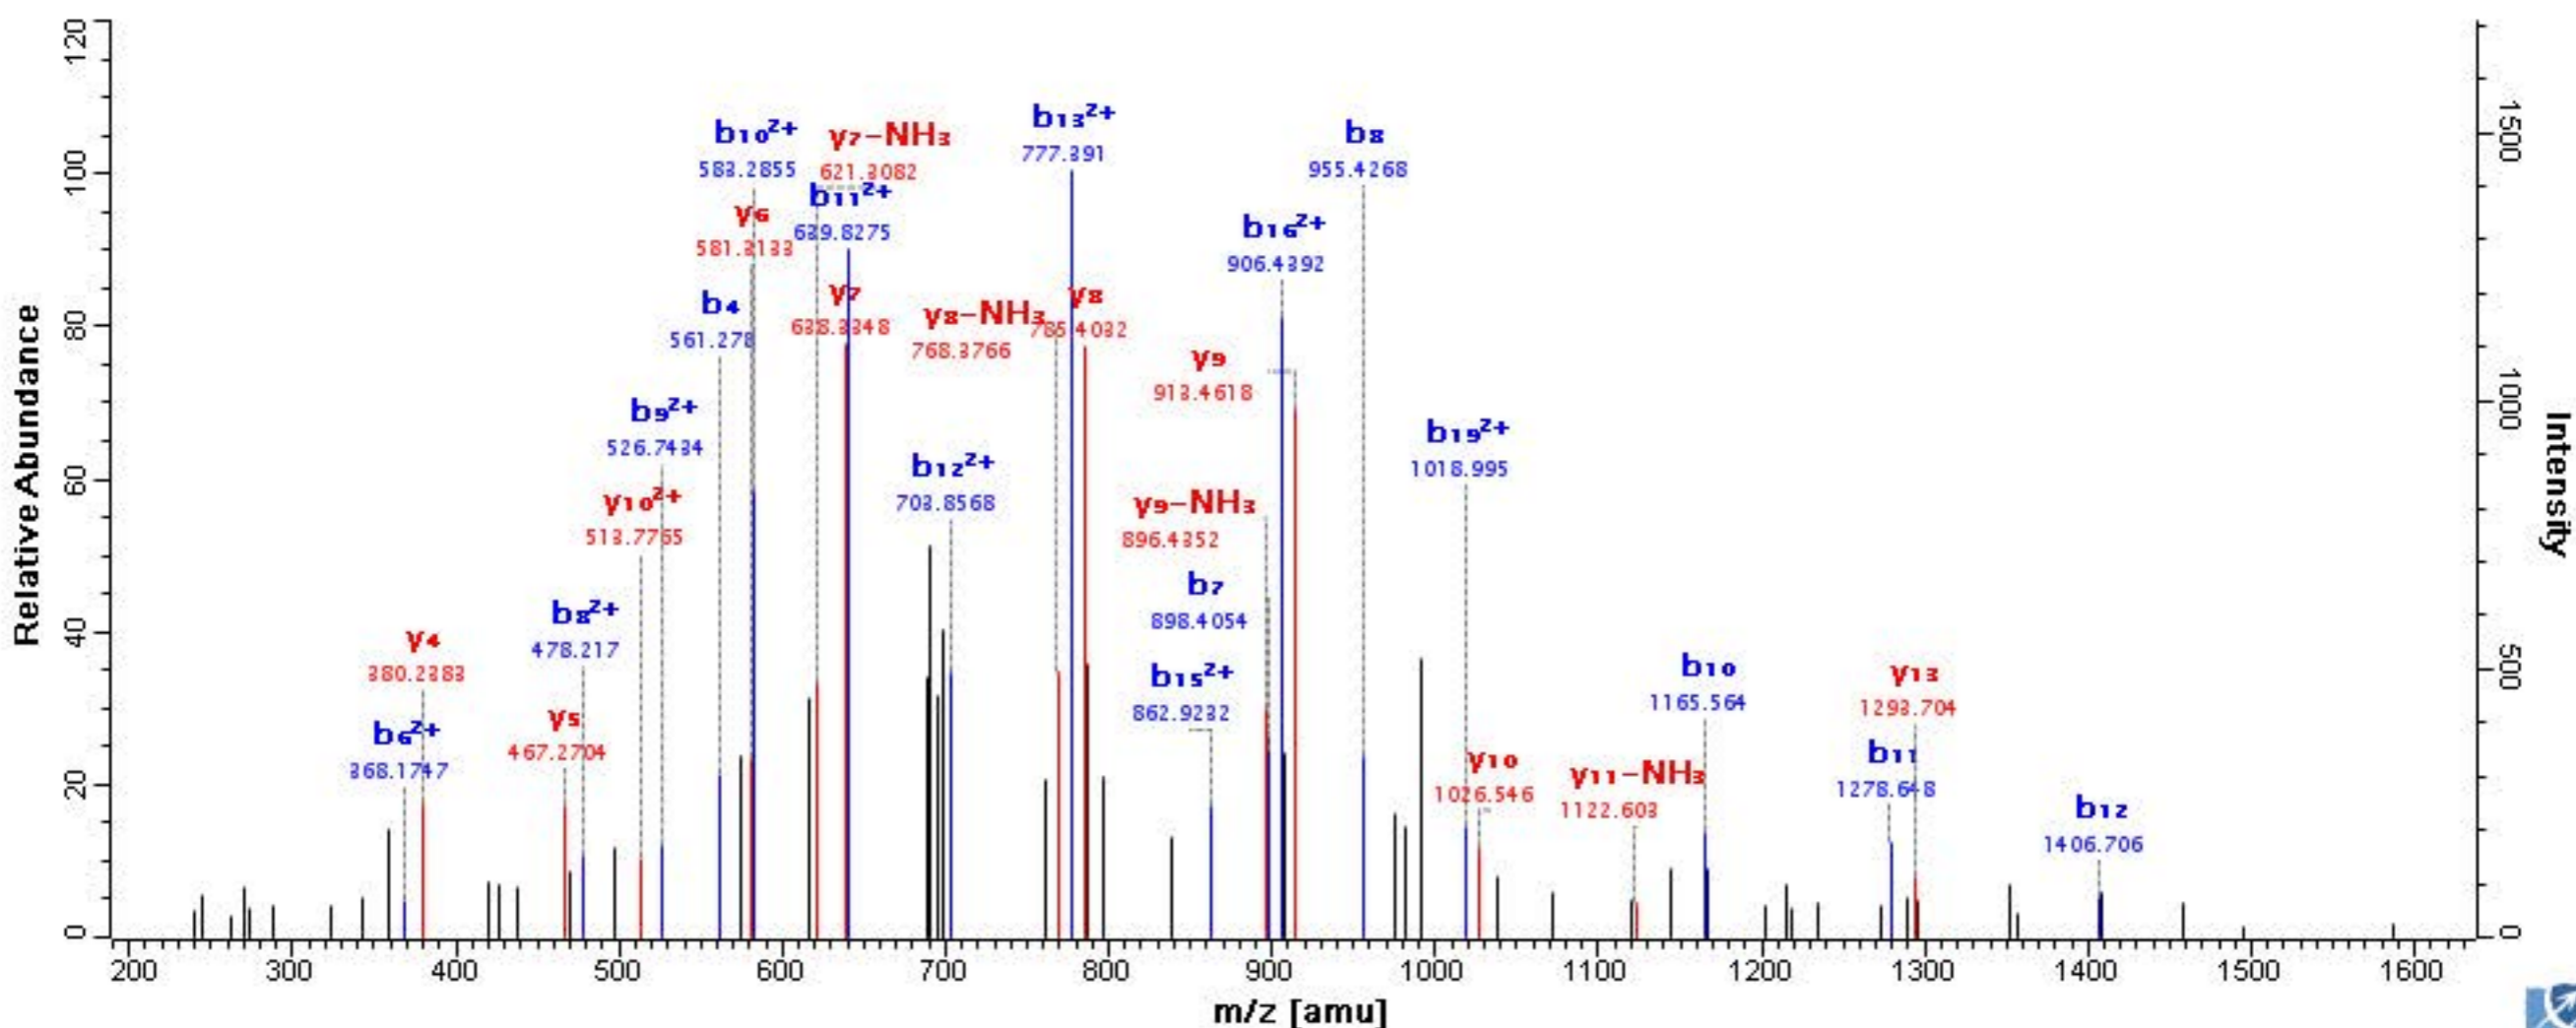

#### precursor information

|                   |                     |
|-------------------|---------------------|
| Mass:             | 2190.09413          |
| m/z:              | System.Collections. |
| Charge:           | System.Collections. |
| Retentiontime:    | System.Collections. |
| Score:            | 132.5122            |
| Mass Error [ppm]: | -0.35814            |
| PEP:              | 6.0981E-19          |
| Precursor Type:   | ISO                 |

| b <sup>2+</sup> ion |          | b ion     |          | seq |   |    | γ ion    |           | γ <sup>2+</sup> ion |           |
|---------------------|----------|-----------|----------|-----|---|----|----------|-----------|---------------------|-----------|
| Δ dalton            | mass     | Δ dalton  | mass     |     |   |    | Δ dalton | mass      | Δ dalton            | mass      |
|                     | 157.1084 |           | 157.1084 | 1   | R | 19 |          |           |                     |           |
|                     | 285.167  |           | 285.167  | 2   | Q | 18 | 2035.001 |           | 2035.001            |           |
|                     | 432.2354 |           | 432.2354 | 3   | F | 17 | 1906.943 |           | 1906.943            |           |
|                     | 561.278  | +0.073224 | 561.278  | 4   | E | 16 | 1759.874 |           | 1759.874            |           |
|                     | 648.31   |           | 648.31   | 5   | S | 15 | 1630.831 |           | 1630.831            |           |
| -0.082306           | 368.1747 |           | 735.342  | 6   | S | 14 | 1543.799 |           | 1543.799            |           |
|                     | 898.4054 | +0.327736 | 898.4054 | 7   | Y | 13 | 1456.767 |           | 1456.767            |           |
| +0.397636           | 478.217  | +0.192625 | 955.4268 | 8   | G | 12 | 1293.704 | +0.18566  | 1293.704            |           |
| +0.346474           | 526.7434 |           | 1052.48  | 9   | P | 11 | 1236.683 |           | 1236.683            |           |
| +0.109374           | 583.2855 | +0.055248 | 1165.564 | 10  | I | 10 | 1139.63  |           | 1139.63             |           |
| +0.13503            | 639.8275 | +0.301262 | 1278.648 | 11  | I | 9  | 1026.546 | +0.366412 | 513.7765            | +0.060793 |
| -0.093051           | 703.8568 | +0.283089 | 1406.706 | 12  | Q | 8  | 913.4618 | -0.003198 | 913.4618            |           |
| +0.369447           | 777.391  |           | 1553.775 | 13  | F | 7  | 785.4032 | +0.171895 | 785.4032            |           |
|                     | 1610.796 |           | 1610.796 | 14  | G | 6  | 638.3348 | +0.063002 | 638.3348            |           |
| +0.471284           | 862.9232 |           | 1724.839 | 15  | N | 5  | 581.3133 | -0.010322 | 581.3133            |           |
| +0.062143           | 906.4392 |           | 1811.871 | 16  | S | 4  | 467.2704 | +0.13368  | 467.2704            |           |
|                     | 1908.924 |           | 1908.924 | 17  | P | 3  | 380.2383 | +0.2442   | 380.2383            |           |
|                     | 1979.961 |           | 1979.961 | 18  | A | 2  | 283.1856 |           | 283.1856            |           |
| +0.091677           | 1018.995 |           | 2036.982 | 19  | G | 1  | 212.1485 |           | 212.1485            |           |
|                     |          |           |          | 20  | K | 0  | 155.127  |           | 155.127             |           |

#### general information

|                       |           |
|-----------------------|-----------|
| Annotation:           | 14 of 20  |
| AminoAcids Coverage:  | 70 %      |
| Intensity Coverage:   | 59 %      |
| Protein Localisation: | 55 ... 74 |

Source: 20120521\_VR\_Bsu\_TripleSILACrep1\_L2ESLS\_OG\_F11  
 Scannumber: 18774  
 Protein: BSU00160; yaaH  
 Peptide Score: 135.86  
 Method: ITMS; CID; 3

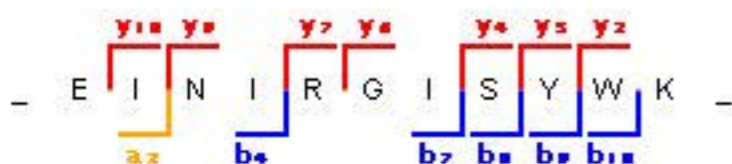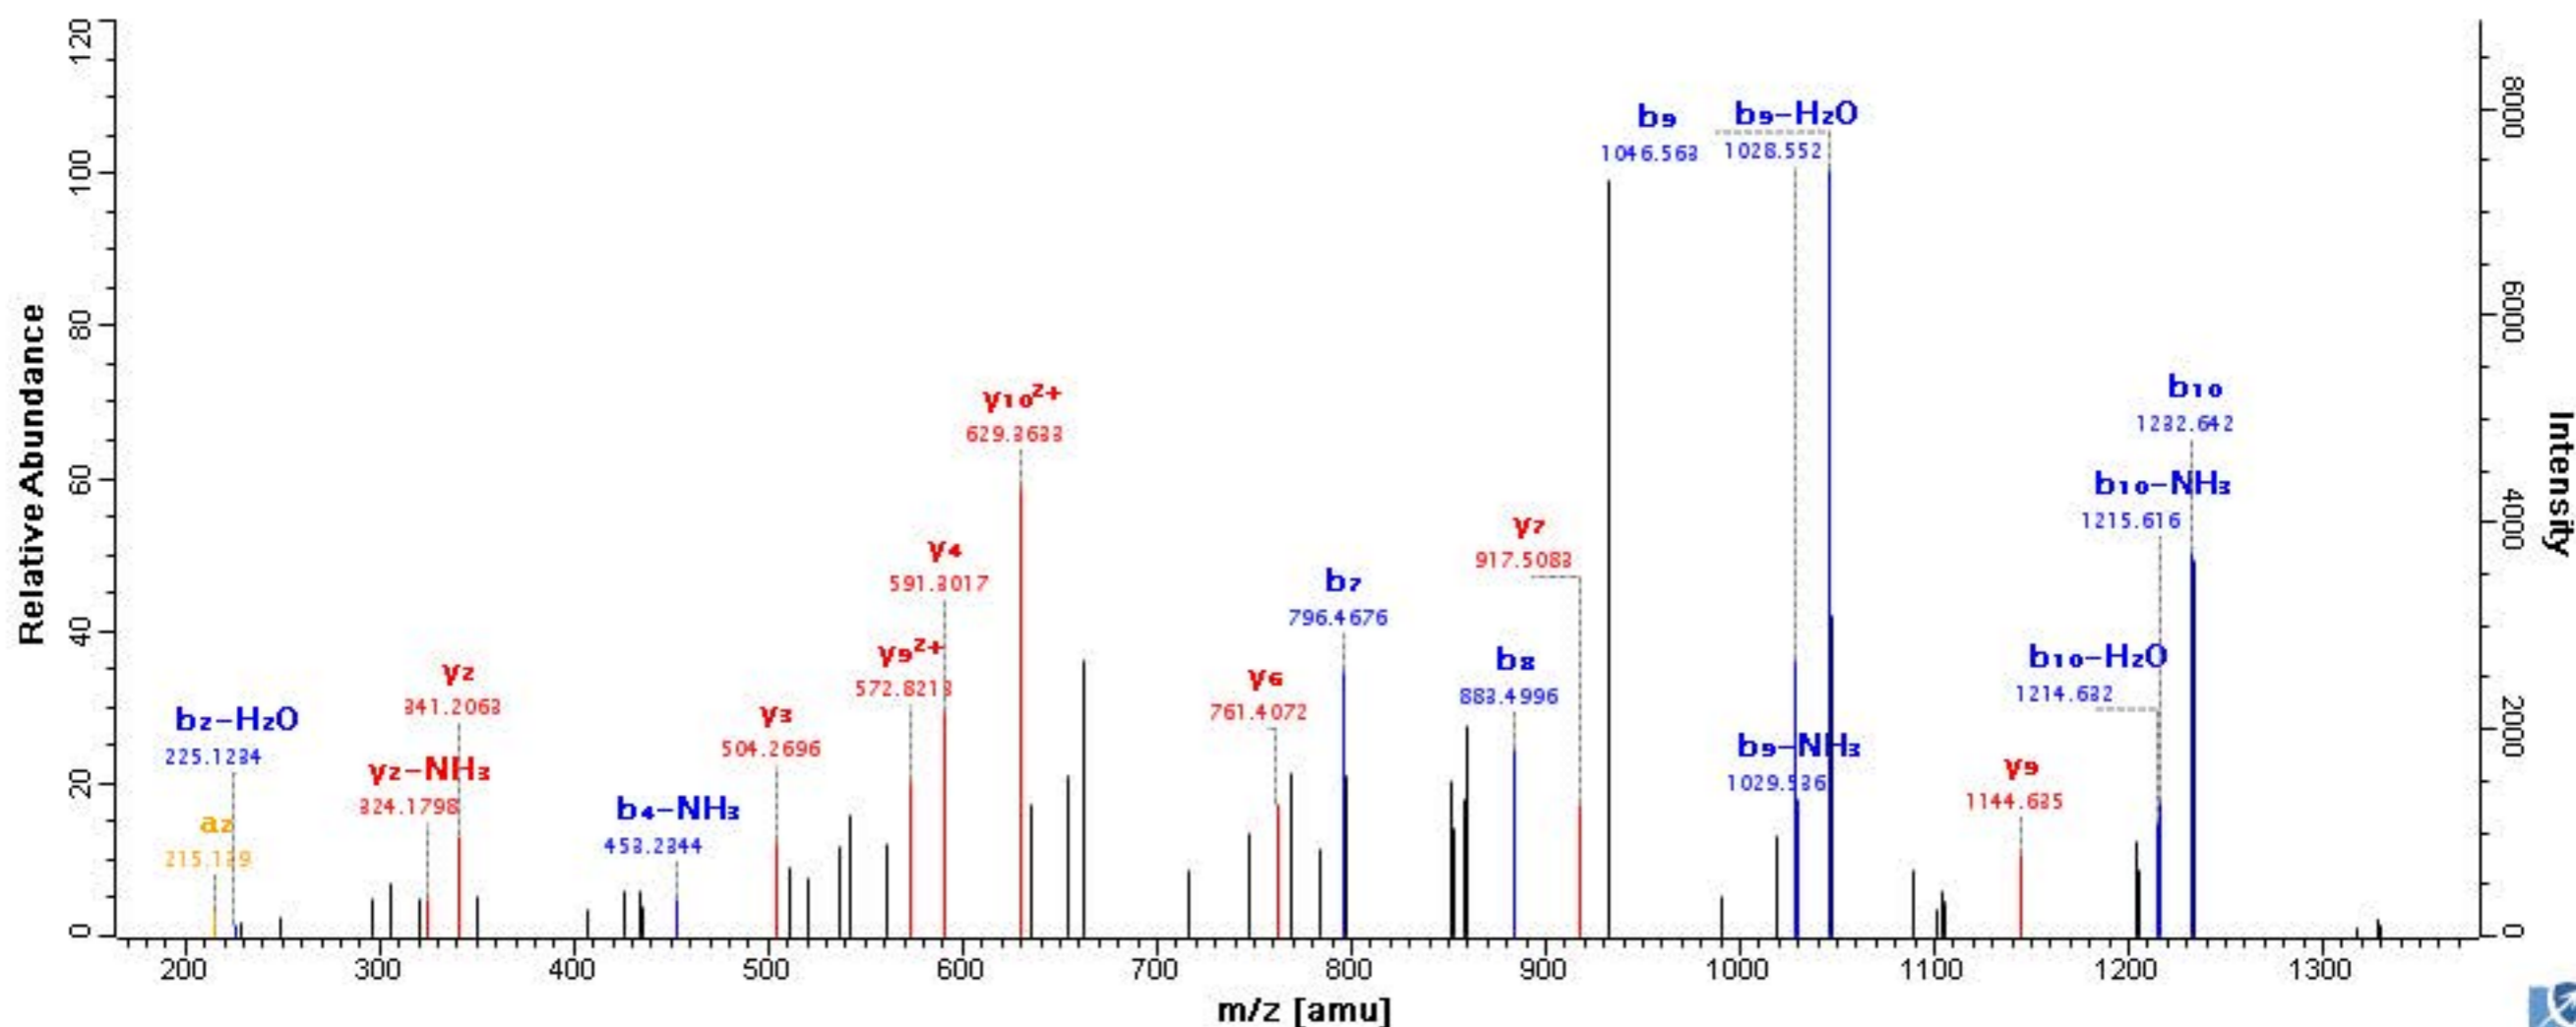

#### precursor information

|                   |                     |
|-------------------|---------------------|
| Mass:             | 1385.75407          |
| m/z:              | System.Collections. |
| Charge:           | System.Collections. |
| Retentiontime:    | System.Collections. |
| Score:            | 135.8587            |
| Mass Error [ppm]: | -0.44599            |
| PEP:              | 0.0021224           |
| Precursor Type:   | ISO                 |

#### general information

|                       |             |
|-----------------------|-------------|
| Annotation:           | 9 of 11     |
| AminoAcids Coverage:  | 82 %        |
| Intensity Coverage:   | 45 %        |
| Protein Localisation: | 393 ... 403 |

| a ion     |          | b ion     |          |    |     |    | y ion    |           | y <sup>2+</sup> ion |           |
|-----------|----------|-----------|----------|----|-----|----|----------|-----------|---------------------|-----------|
| Δ dalton  | mass     | Δ dalton  | mass     |    | seq |    | Δ dalton | mass      | Δ dalton            | mass      |
|           | 102.055  |           | 130.0499 | 1  | E   | 10 |          |           |                     |           |
| -0.035015 | 215.139  |           | 243.1339 | 2  | I   | 9  | 1257.719 |           | 629.3633            | +0.215047 |
|           | 329.1819 |           | 357.1769 | 3  | N   | 8  | 1144.635 | +0.190381 | 572.8213            | +0.304199 |
|           | 442.266  |           | 470.2609 | 4  | I   | 7  | 1030.592 |           | 1030.592            |           |
|           | 598.3671 |           | 626.362  | 5  | R   | 6  | 917.5083 | +0.032887 | 917.5083            |           |
|           | 655.3886 |           | 683.3835 | 6  | G   | 5  | 761.4072 | +0.283046 | 761.4072            |           |
|           | 768.4726 | +0.09927  | 796.4676 | 7  | I   | 4  | 704.3857 |           | 704.3857            |           |
|           | 855.5047 | -0.006855 | 883.4996 | 8  | S   | 3  | 591.3017 | +0.009423 | 591.3017            |           |
|           | 1018.568 | +0.09516  | 1046.563 | 9  | Y   | 2  | 504.2696 | +0.069711 | 504.2696            |           |
|           | 1204.647 | +0.080423 | 1232.642 | 10 | W   | 1  | 341.2063 | +0.019209 | 341.2063            |           |
|           |          |           |          | 11 | K   | 0  | 155.127  |           | 155.127             |           |

Source: 20120521\_VR\_Bsu\_TripleSILACrep1\_L2ESLS\_OG\_F11  
 Scannumber: 21842  
 Protein: BSU20680; yoqC  
 Peptide Score: 72.62  
 Method: ITMS; CID; 3

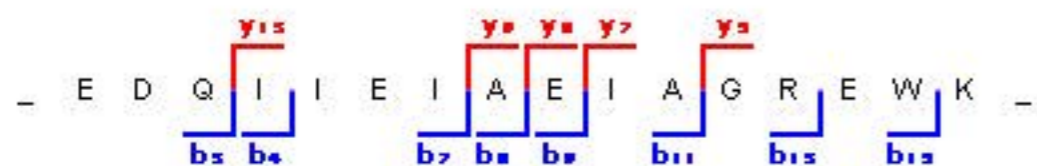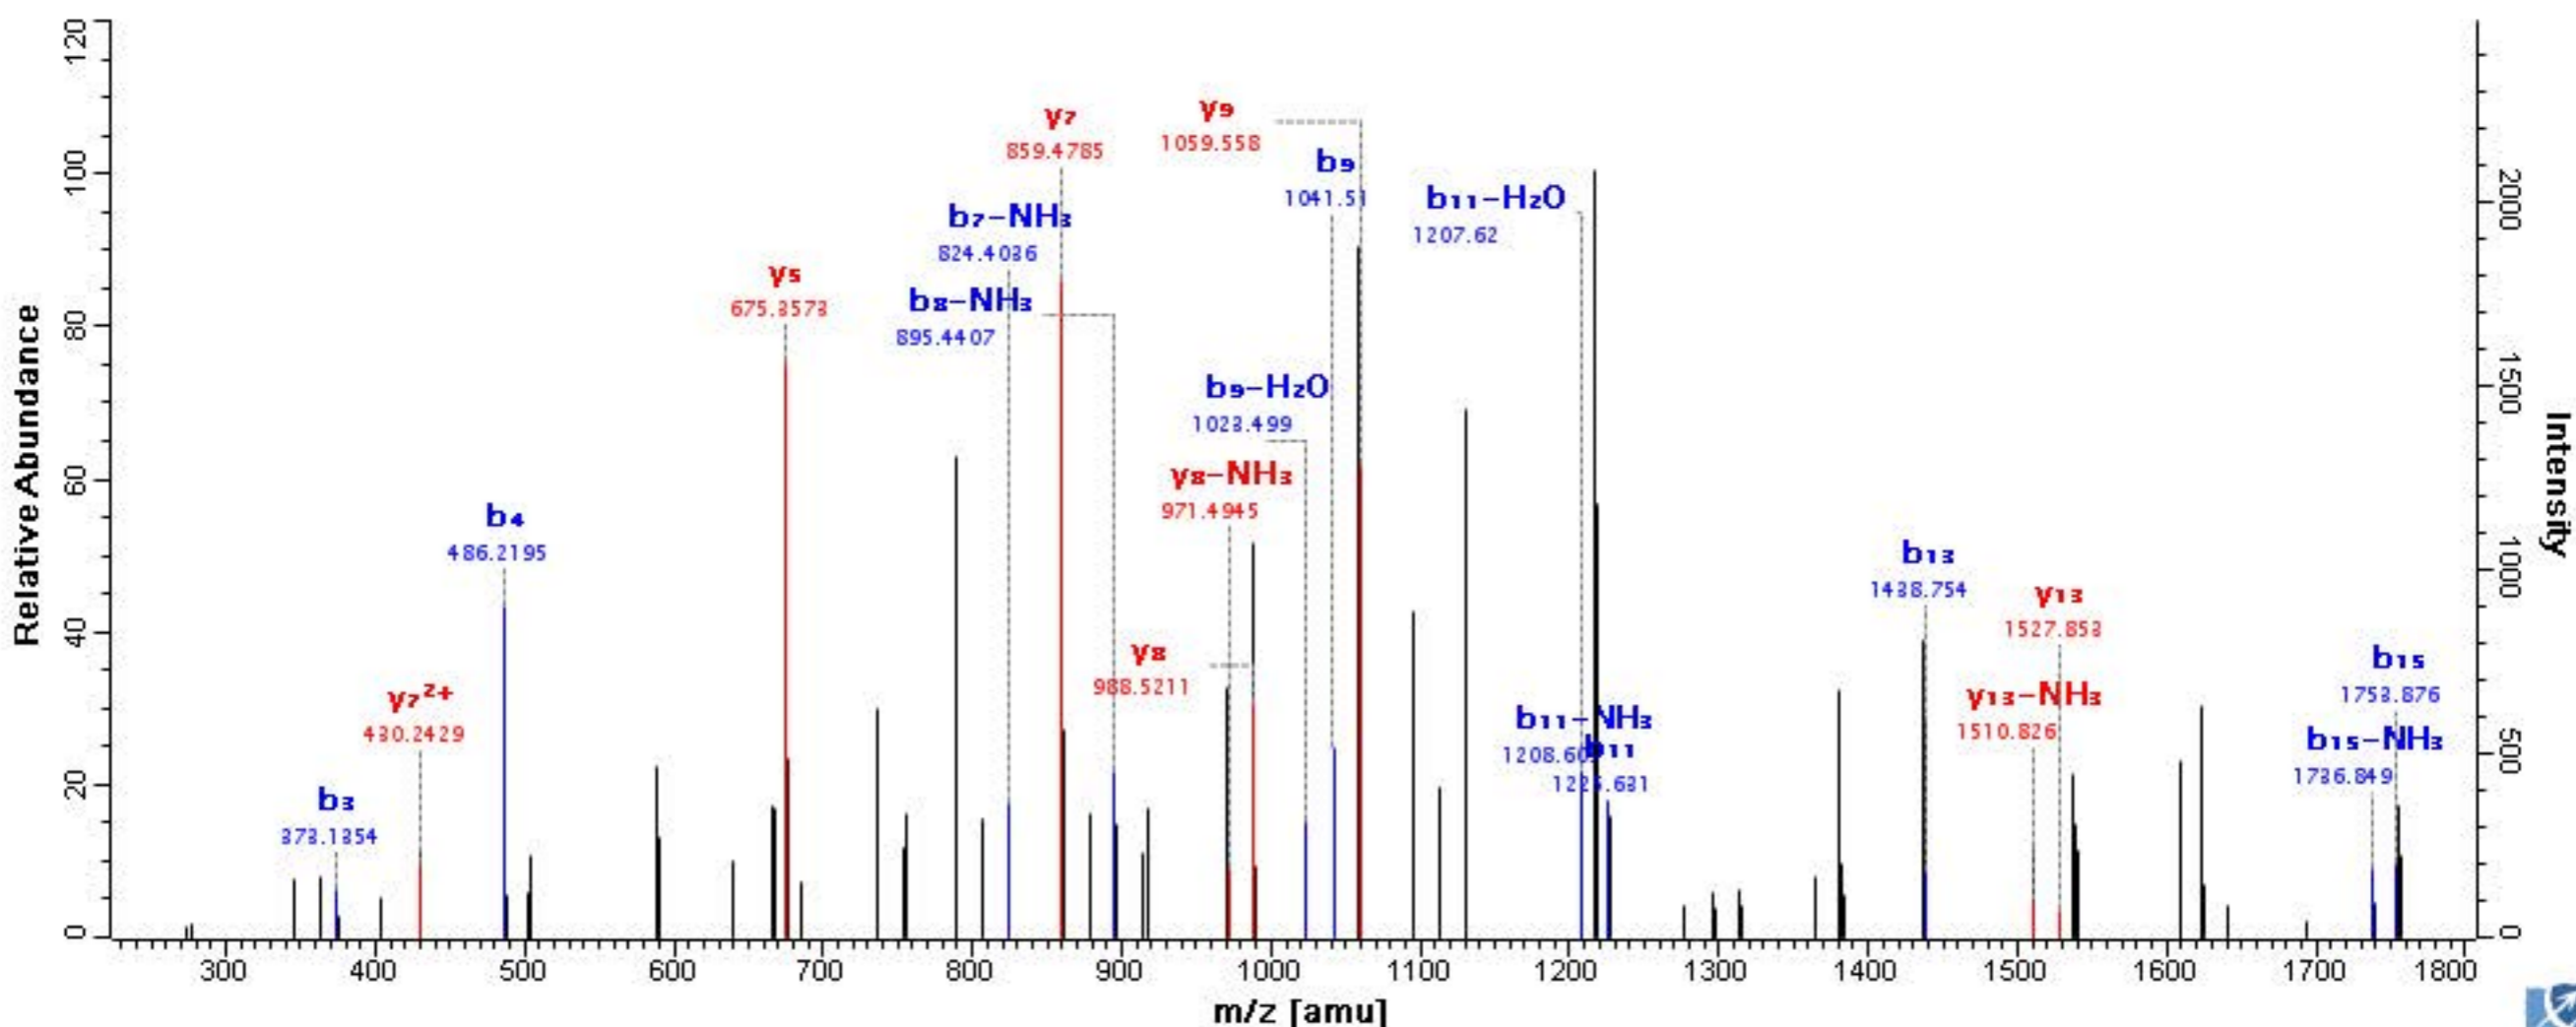

#### precursor information

|                   |                     |
|-------------------|---------------------|
| Mass:             | 1898.97431          |
| m/z:              | System.Collections. |
| Charge:           | System.Collections. |
| Retentiontime:    | System.Collections. |
| Score:            | 72.61512            |
| Mass Error [ppm]: | 0.27194             |
| PEP:              | 0.00065678          |
| Precursor Type:   | MULTI               |

| b ion      |              |    |     |    | y ion        |            | y <sup>2+</sup> ion |           |
|------------|--------------|----|-----|----|--------------|------------|---------------------|-----------|
| Δ dalton   | mass         |    | seq |    | Δ dalton     | mass       | Δ dalton            | mass      |
|            | 130.04986956 | 1  | E   | 15 |              |            |                     |           |
|            | 245.07681259 | 2  | D   | 14 | 1770.9384752 |            | 1770.9384752        |           |
| +0.0988628 | 373.13539011 | 3  | Q   | 13 | 1655.9115322 |            | 1655.9115322        |           |
| +0.1256997 | 486.21945409 | 4  | I   | 12 | 1527.8529547 | +0.148144  | 1527.8529547        |           |
|            | 599.30351807 | 5  | I   | 11 | 1414.7688907 |            | 1414.7688907        |           |
|            | 728.34611116 | 6  | E   | 10 | 1301.6848267 |            | 1301.6848267        |           |
|            | 841.43017514 | 7  | I   | 9  | 1172.6422336 |            | 1172.6422336        |           |
|            | 912.46728893 | 8  | A   | 8  | 1059.5581696 | +0.212094  | 1059.5581696        |           |
| +0.1904354 | 1041.509882  | 9  | E   | 7  | 988.52105584 | +0.1860364 | 988.52105584        |           |
|            | 1154.593946  | 10 | I   | 6  | 859.47846274 | +0.1482462 | 430.2428696         | +0.108937 |
| +0.0384959 | 1225.6310598 | 11 | A   | 5  | 746.39439876 |            | 746.39439876        |           |
|            | 1282.6525235 | 12 | G   | 4  | 675.35728497 | +0.1057277 | 675.35728497        |           |
| +0.1460237 | 1438.7536345 | 13 | R   | 3  | 618.33582125 |            | 618.33582125        |           |
|            | 1567.7962276 | 14 | E   | 2  | 462.23471022 |            | 462.23471022        |           |
| +0.224435  | 1753.8755406 | 15 | W   | 1  | 333.19211712 |            | 333.19211712        |           |
|            |              | 16 | K   | 0  | 147.11280417 |            | 147.11280417        |           |

#### general information

|                       |           |
|-----------------------|-----------|
| Annotation:           | 11 of 16  |
| AminoAcids Coverag    | 69 %      |
| Intensity Coverage:   | 27 %      |
| Protein Localisation: | 67 ... 82 |

Source: 20120521\_VR\_Bsu\_TripleSILACrep1\_L2ESLS\_OG\_F11  
 Scannumber: 23153  
 Protein: BSU39100; S3AR; yxiO  
 Peptide Score: 123.28  
 Method: ITMS; CID; 3

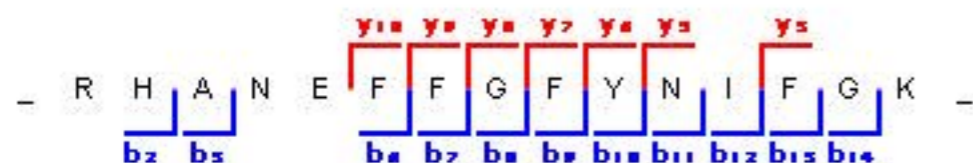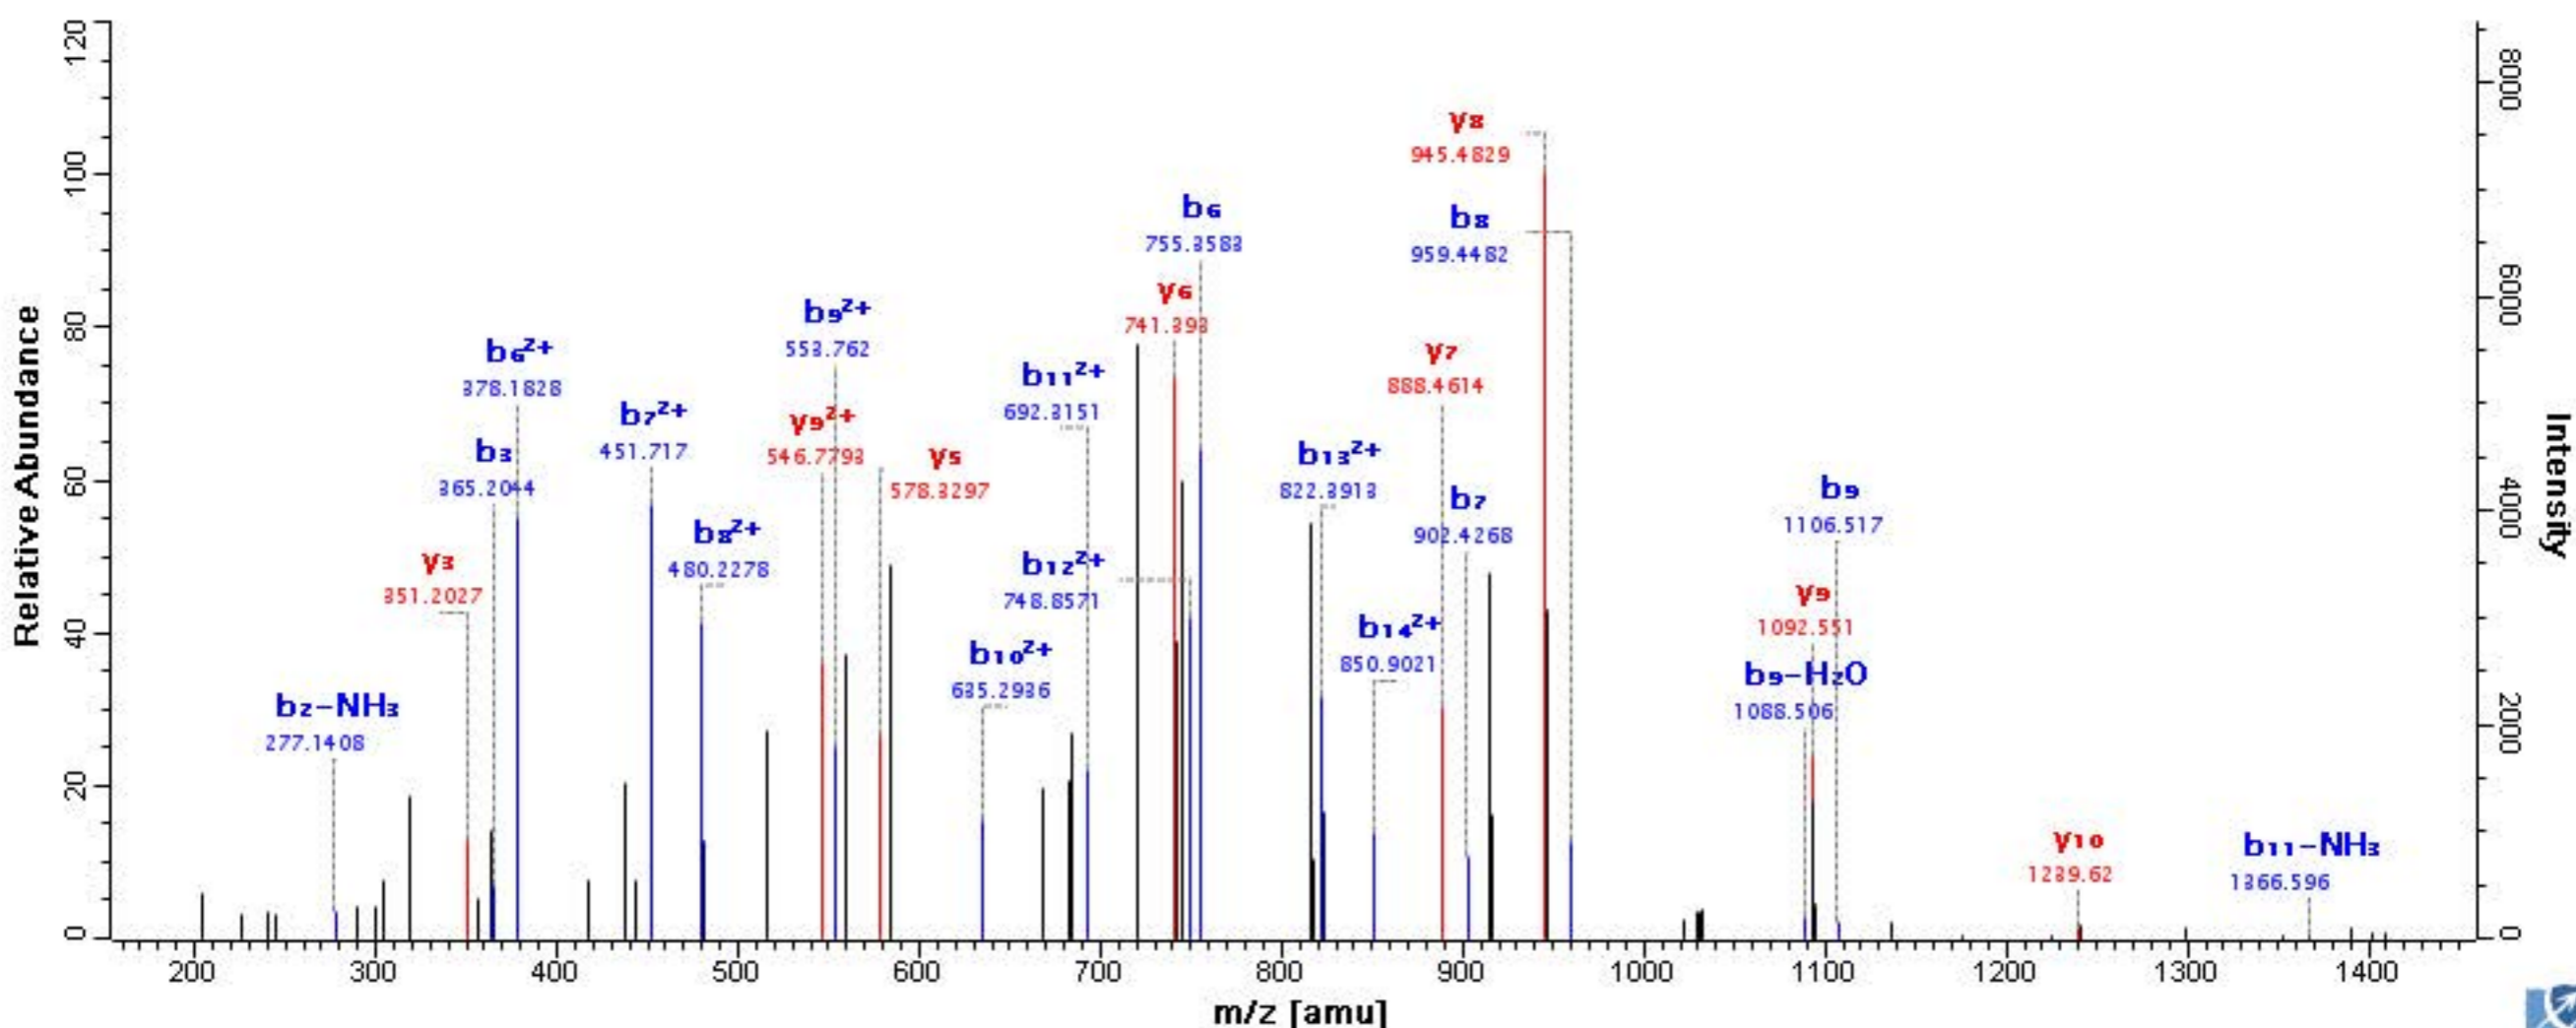

**precursor information**

|                   |                     |
|-------------------|---------------------|
| Mass:             | 1845.89551          |
| m/z:              | System.Collections. |
| Charge:           | System.Collections. |
| Retentiontime:    | System.Collections. |
| Score:            | 123.2753            |
| Mass Error [ppm]: | 0.2296              |
| PEP:              | 5.4218E-06          |
| Precursor Type:   | MULTI               |

| b <sup>2+</sup> ion |          | b ion     |          | seq |   |    | y ion    |           | y <sup>2+</sup> ion |           |
|---------------------|----------|-----------|----------|-----|---|----|----------|-----------|---------------------|-----------|
| Δ dalton            | mass     | Δ dalton  | mass     |     |   |    | Δ dalton | mass      | Δ dalton            | mass      |
|                     | 157.1084 |           | 157.1084 | 1   | R | 14 |          |           |                     |           |
|                     | 294.1673 |           | 294.1673 | 2   | H | 13 | 1690.801 |           | 1690.801            |           |
|                     | 365.2044 | +0.045526 | 365.2044 | 3   | A | 12 | 1553.742 |           | 1553.742            |           |
|                     | 479.2473 |           | 479.2473 | 4   | N | 11 | 1482.705 |           | 1482.705            |           |
|                     | 608.2899 |           | 608.2899 | 5   | E | 10 | 1368.662 |           | 1368.662            |           |
| +0.143604           | 378.1828 | +0.042959 | 755.3583 | 6   | F | 9  | 1239.62  | +0.247236 | 1239.62             |           |
| +0.041099           | 451.717  | +0.039547 | 902.4268 | 7   | F | 8  | 1092.551 | +0.114966 | 546.7793            | +0.334729 |
| +0.055757           | 480.2278 | +0.070513 | 959.4482 | 8   | G | 7  | 945.4829 | +0.053986 | 945.4829            |           |
| -0.046626           | 553.762  | +0.451012 | 1106.517 | 9   | F | 6  | 888.4614 | +0.050669 | 888.4614            |           |
| +0.224566           | 635.2936 |           | 1269.58  | 10  | Y | 5  | 741.393  | +0.05048  | 741.393             |           |
| +0.203103           | 692.3151 |           | 1383.623 | 11  | N | 4  | 578.3297 | +0.012429 | 578.3297            |           |
| +0.118468           | 748.8571 |           | 1496.707 | 12  | I | 3  | 464.2867 |           | 464.2867            |           |
| +0.256808           | 822.3913 |           | 1643.775 | 13  | F | 2  | 351.2027 | +0.045243 | 351.2027            |           |
| +0.169293           | 850.9021 |           | 1700.797 | 14  | G | 1  | 204.1343 |           | 204.1343            |           |
|                     |          |           |          | 15  | K | 0  | 147.1128 |           | 147.1128            |           |

**general information**

|                       |             |
|-----------------------|-------------|
| Annotation:           | 12 of 15    |
| AminoAcids Coverag    | 80 %        |
| Intensity Coverage:   | 49 %        |
| Protein Localisation: | 356 ... 370 |

Source: 20120521\_VR\_Bsu\_TripleSILACrep1\_L2ESLS\_OG\_F12  
 Scannumber: 16008  
 Protein: BSU01720; ybbK  
 Peptide Score: 111.86  
 Method: ITMS; CID; 3

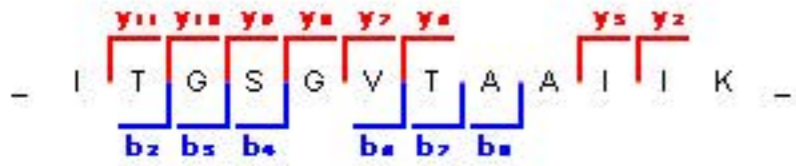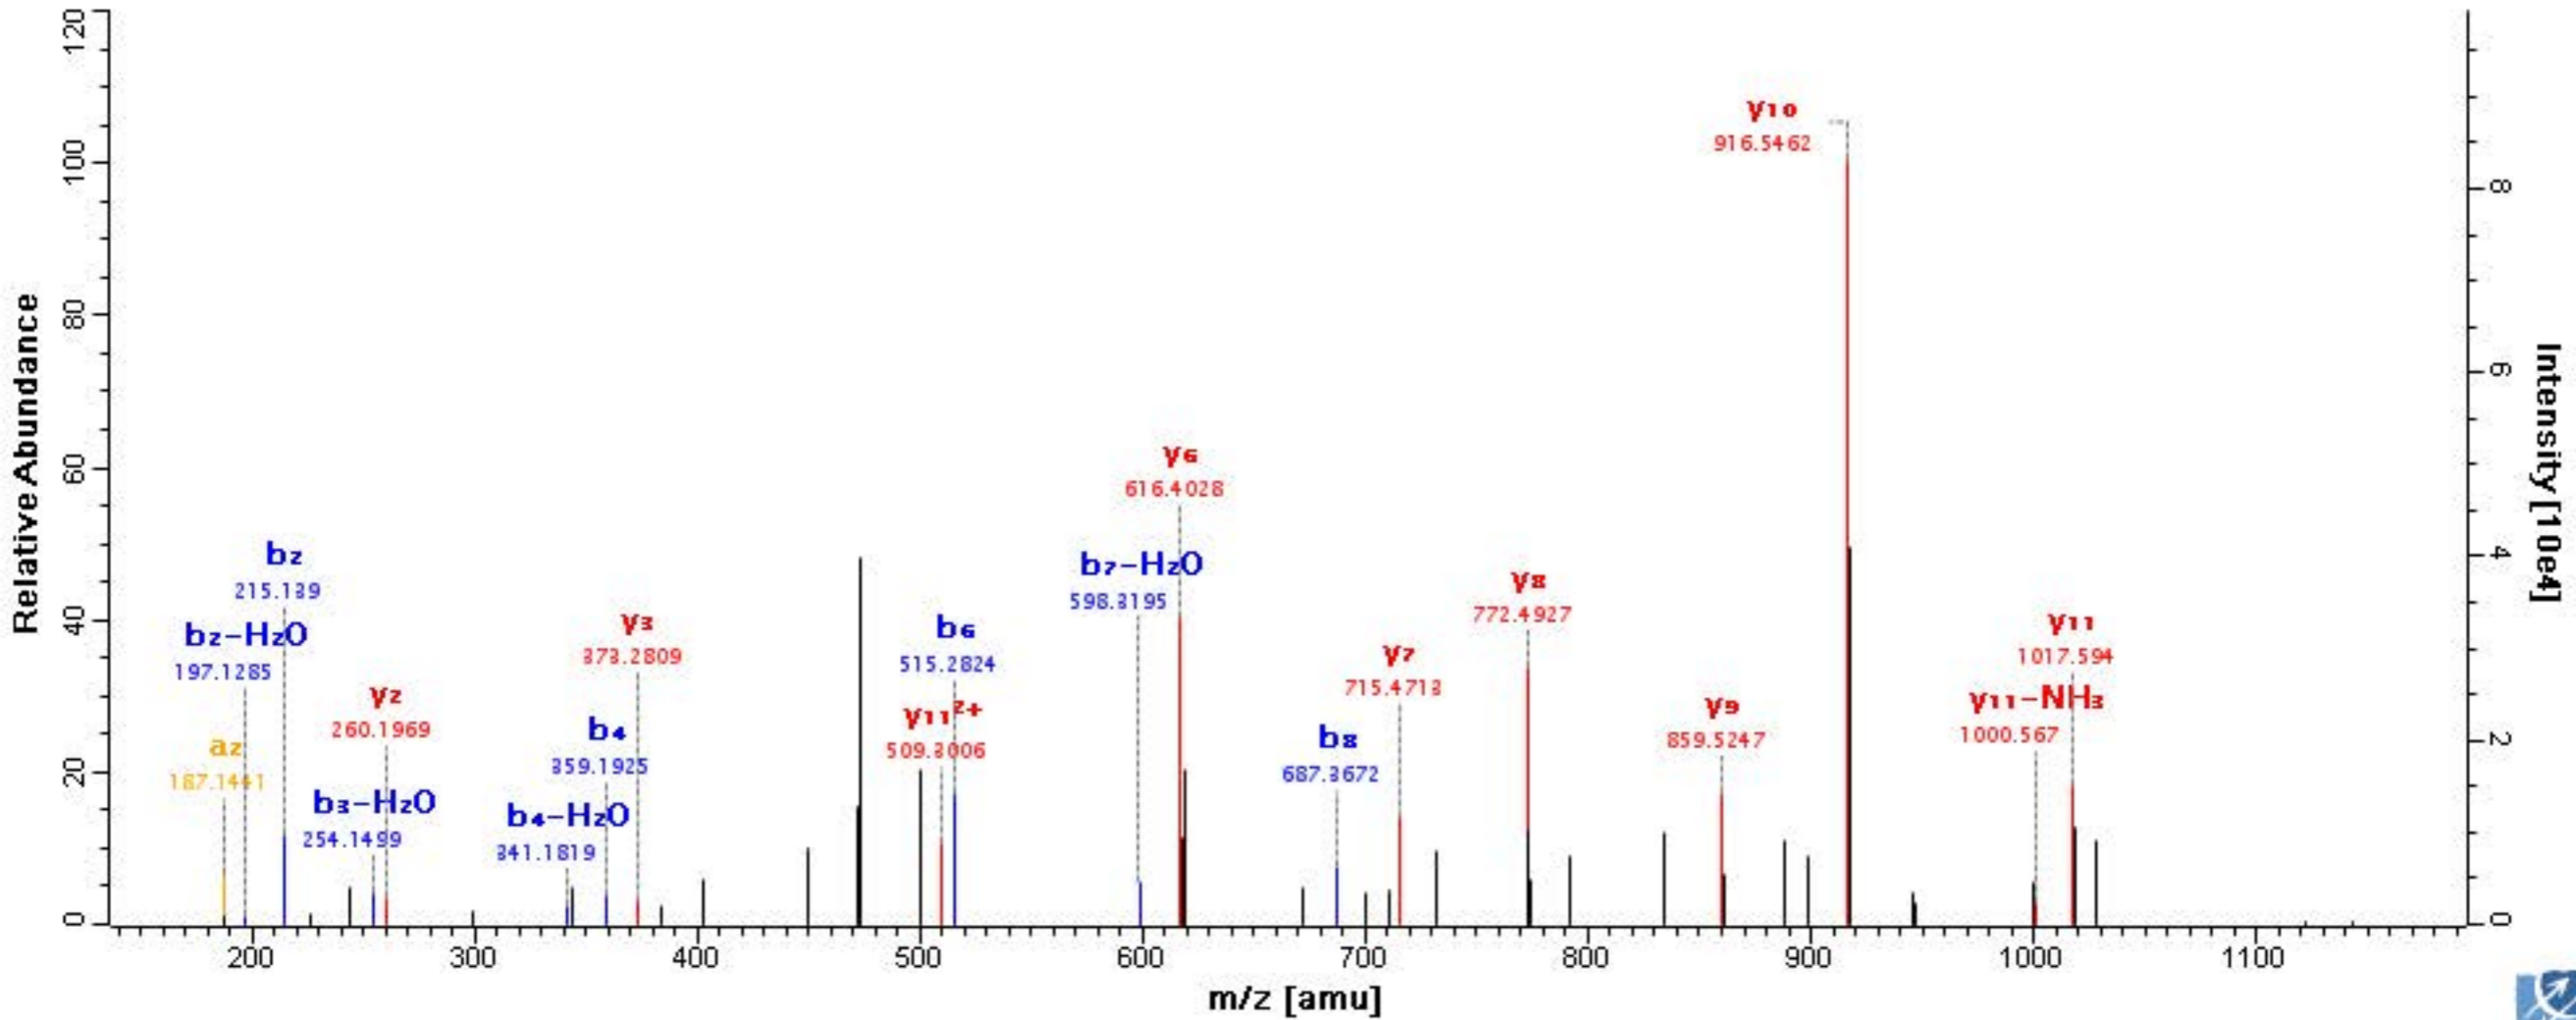

#### precursor information

|                   |                     |
|-------------------|---------------------|
| Mass:             | 1129.6696           |
| m/z:              | System.Collections. |
| Charge:           | System.Collections. |
| Retentiontime:    | System.Collections. |
| Score:            | 111.8553            |
| Mass Error [ppm]: | -0.95058            |
| PEP:              | 0.00049291          |
| Precursor Type:   | MULTI               |

#### general information

|                       |             |
|-----------------------|-------------|
| Annotation:           | 9 of 12     |
| AminoAcids Coverag    | 75 %        |
| Intensity Coverage:   | 48 %        |
| Protein Localisation: | 124 ... 135 |

| a ion     |          | b ion     |          |    | seq |    | γ ion    |           | γ <sup>2+</sup> ion |           |
|-----------|----------|-----------|----------|----|-----|----|----------|-----------|---------------------|-----------|
| Δ dalton  | mass     | Δ dalton  | mass     |    |     |    | Δ dalton | mass      | Δ dalton            | mass      |
|           | 86.09643 |           | 114.0913 | 1  | I   | 11 |          |           |                     |           |
| -0.096619 | 187.1441 | -0.107494 | 215.139  | 2  | T   | 10 | 1017.594 | +0.256516 | 509.3006            | +0.440446 |
|           | 244.1656 |           | 272.1605 | 3  | G   | 9  | 916.5462 | +0.071712 | 916.5462            |           |
|           | 331.1976 | +0.003717 | 359.1925 | 4  | S   | 8  | 859.5247 | +0.258764 | 859.5247            |           |
|           | 388.2191 |           | 416.214  | 5  | G   | 7  | 772.4927 | +0.01351  | 772.4927            |           |
|           | 487.2875 | +0.02236  | 515.2824 | 6  | V   | 6  | 715.4713 | +0.098267 | 715.4713            |           |
|           | 588.3352 |           | 616.3301 | 7  | T   | 5  | 616.4028 | +0.014398 | 616.4028            |           |
|           | 659.3723 | +0.111518 | 687.3672 | 8  | A   | 4  | 515.3552 |           | 515.3552            |           |
|           | 730.4094 |           | 758.4043 | 9  | A   | 3  | 444.318  |           | 444.318             |           |
|           | 843.4934 |           | 871.4884 | 10 | I   | 2  | 373.2809 | +0.004834 | 373.2809            |           |
|           | 956.5775 |           | 984.5724 | 11 | I   | 1  | 260.1969 | +0.028626 | 260.1969            |           |
|           |          |           |          | 12 | K   | 0  | 147.1128 |           | 147.1128            |           |

Source: 20120521\_VR\_Bsu\_TripleSILACrep1\_L2ESLS\_OG\_F12  
 Scannumber: 20315  
 Protein: atpB; BSU36870  
 Peptide Score: 144.1  
 Method: ITMS; CID; 3

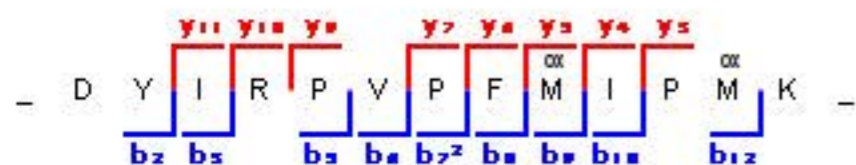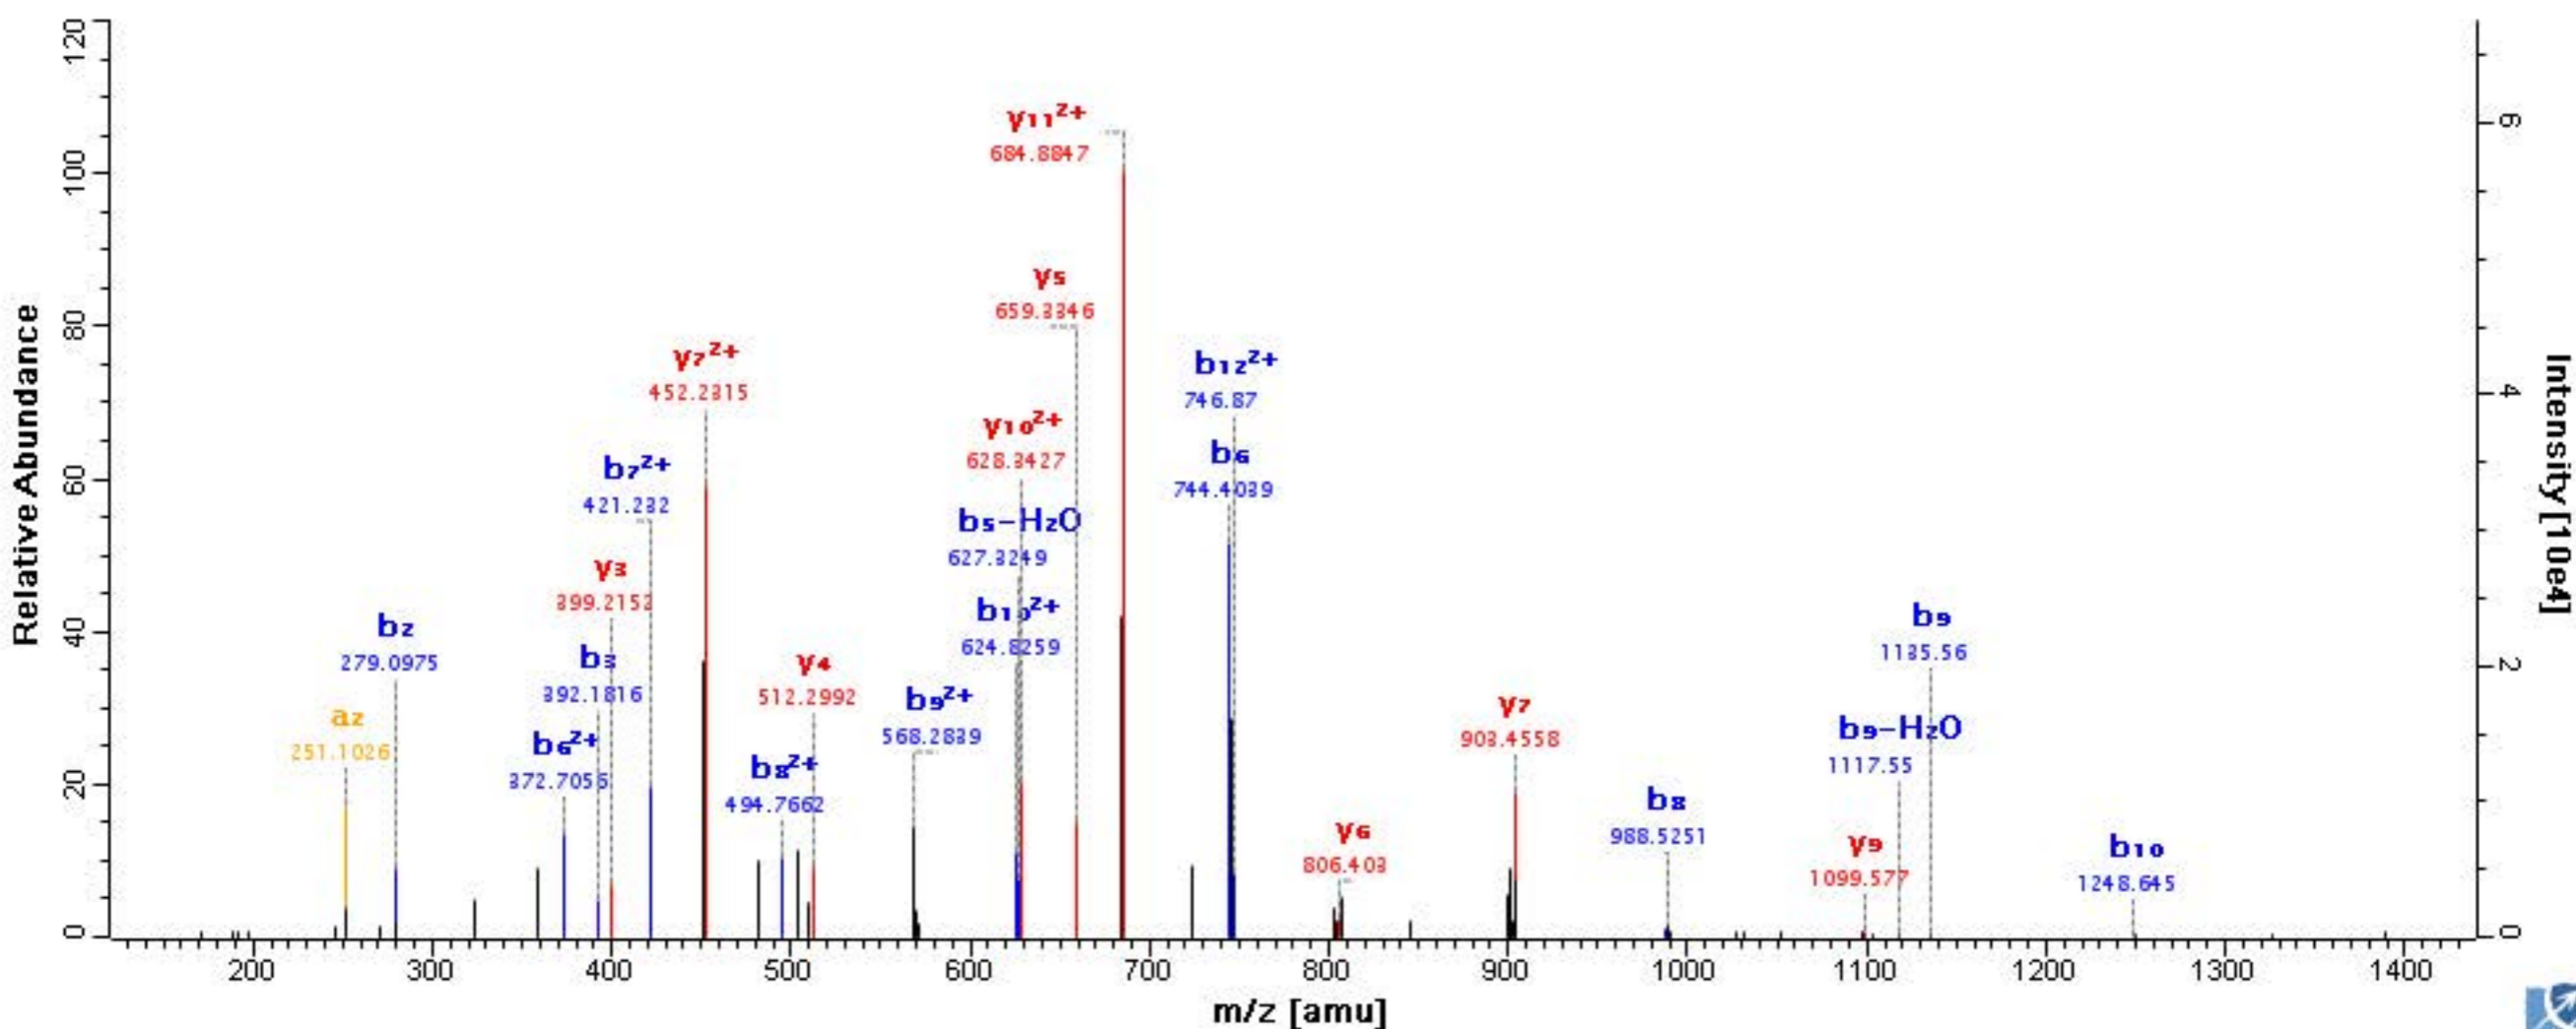

#### precursor information

|                   |                     |
|-------------------|---------------------|
| Mass:             | 1637.83038          |
| m/z:              | System.Collections. |
| Charge:           | System.Collections. |
| Retentiontime:    | System.Collections. |
| Score:            | 144.1029            |
| Mass Error [ppm]: | -0.34722            |
| PEP:              | 2.3762E-08          |
| Precursor Type:   | MULTI               |

#### general information

|                       |             |
|-----------------------|-------------|
| Annotation:           | 11 of 13    |
| AminoAcids Coverage:  | 85 %        |
| Intensity Coverage:   | 59 %        |
| Protein Localisation: | 143 ... 155 |

| a ion    |         | b <sup>2+</sup> ion |         | b ion    |         |    |     |    | y ion    |          | y <sup>2+</sup> ion |          |
|----------|---------|---------------------|---------|----------|---------|----|-----|----|----------|----------|---------------------|----------|
| Δ dalton | mass    | Δ dalton            | mass    | Δ dalton | mass    |    | seq |    | Δ dalton | mass     | Δ dalton            | mass     |
|          | 88.0393 |                     | 116.034 |          | 116.034 | 1  | D   | 12 |          |          |                     |          |
| -0.0232  | 251.103 |                     | 279.098 | +0.11797 | 279.098 | 2  | Y   | 11 | 1531.83  |          | 1531.83             |          |
|          | 364.187 |                     | 392.182 | +0.07486 | 392.182 | 3  | I   | 10 | 1368.76  |          | 684.885             | +0.26903 |
|          | 520.288 |                     | 548.283 |          | 548.283 | 4  | R   | 9  | 1255.68  |          | 628.343             | +0.31509 |
|          | 617.341 |                     | 645.335 |          | 645.335 | 5  | P   | 8  | 1099.58  | -0.3576  | 1099.58             |          |
|          | 716.409 | +0.2891             | 372.706 | +0.16165 | 744.404 | 6  | V   | 7  | 1002.52  |          | 1002.52             |          |
|          | 813.462 | +0.18527            | 421.232 |          | 841.457 | 7  | P   | 6  | 903.456  | +0.13587 | 452.232             | +0.02273 |
|          | 960.53  | +0.30481            | 494.766 | -0.2981  | 988.525 | 8  | F   | 5  | 806.403  | -0.247   | 806.403             |          |
|          | 1107.57 | +0.06762            | 568.284 | -0.1012  | 1135.56 | 9  | M   | 4  | 659.335  | +0.09933 | 659.335             |          |
|          | 1220.65 | +0.39315            | 624.826 | +0.25036 | 1248.64 | 10 | I   | 3  | 512.299  | +0.33004 | 512.299             |          |
|          | 1317.7  |                     | 1345.7  |          | 1345.7  | 11 | P   | 2  | 399.215  | +0.02427 | 399.215             |          |
|          | 1464.74 | -0.4001             | 746.87  |          | 1492.73 | 12 | M   | 1  | 302.162  |          | 302.162             |          |
|          |         |                     |         |          |         | 13 | K   | 0  | 155.127  |          | 155.127             |          |



Source: 20120521\_VR\_Bsu\_TripleSILACrep1\_L2ESLS\_OG\_F12  
 Scannumber: 7040  
 Protein: BSU38690; yxIC  
 Peptide Score: 94.12  
 Method: ITMS; CID; 3

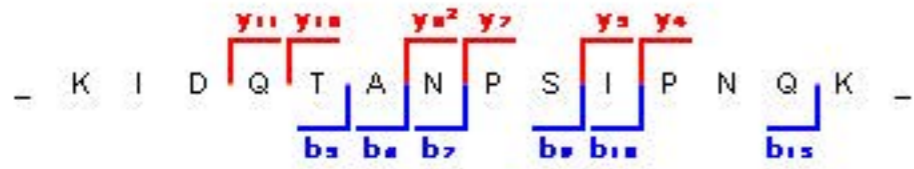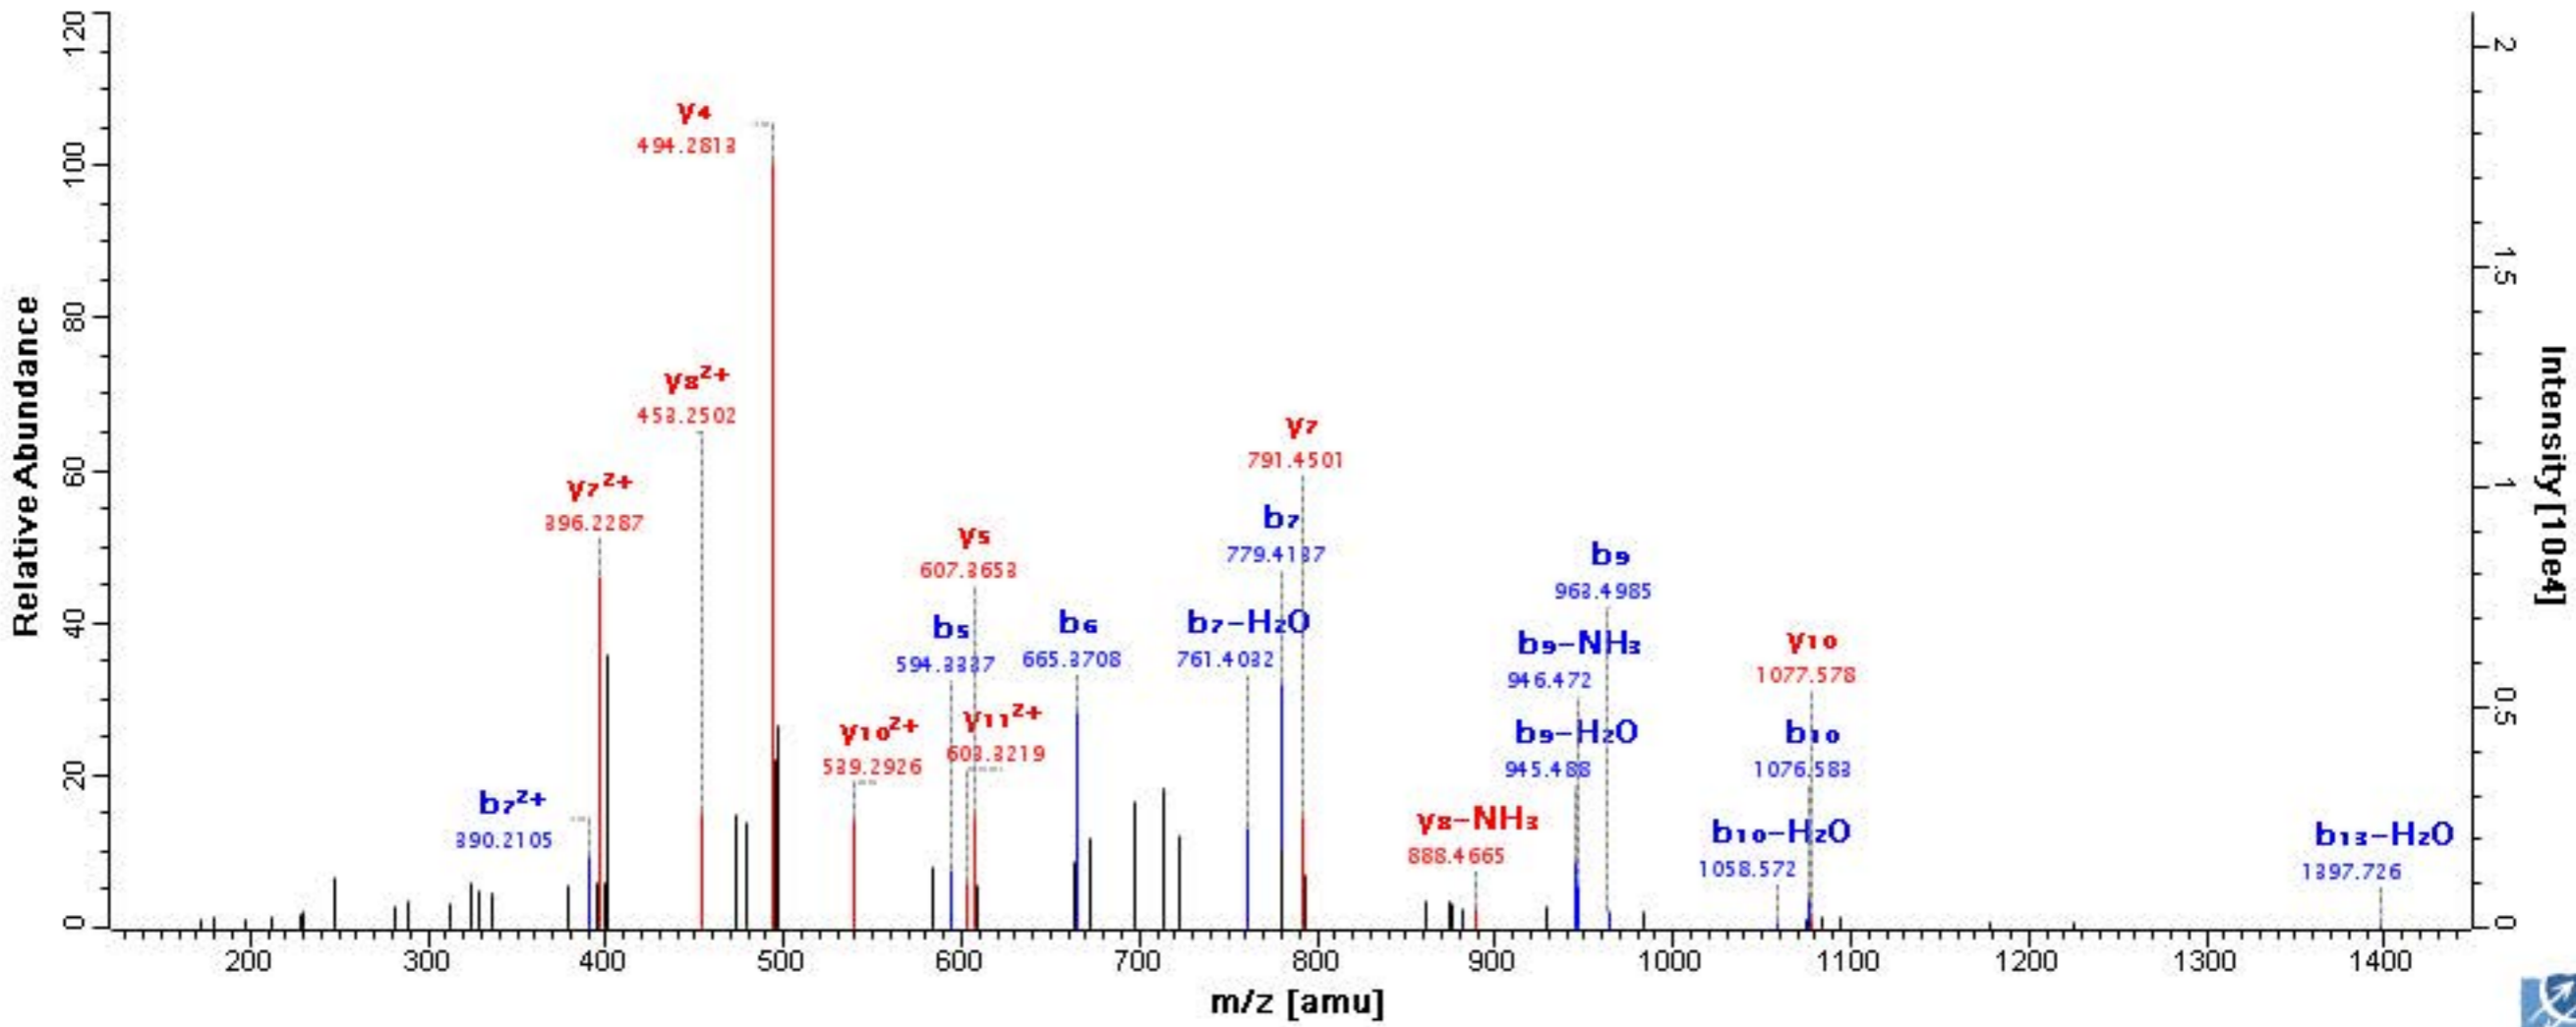

#### precursor information

|                   |                     |
|-------------------|---------------------|
| Mass:             | 1552.82216          |
| m/z:              | System.Collections. |
| Charge:           | System.Collections. |
| Retentiontime:    | System.Collections. |
| Score:            | 94.12169            |
| Mass Error [ppm]: | 0.79269             |
| PEP:              | 8.7899E-05          |
| Precursor Type:   | MULTI               |

#### general information

|                       |           |
|-----------------------|-----------|
| Annotation:           | 9 of 14   |
| AminoAcids Coverag    | 64%       |
| Intensity Coverage:   | 53%       |
| Protein Localisation: | 16 ... 29 |

| b <sup>2+</sup> ion |          | b ion     |          |    |     |    | y ion    |           | y <sup>2+</sup> ion |           |
|---------------------|----------|-----------|----------|----|-----|----|----------|-----------|---------------------|-----------|
| Δ dalton            | mass     | Δ dalton  | mass     |    | seq |    | Δ dalton | mass      | Δ dalton            | mass      |
|                     | 137.1164 |           | 137.1164 | 1  | K   | 13 |          |           |                     |           |
|                     | 250.2005 |           | 250.2005 | 2  | I   | 12 | 1433.747 |           | 1433.747            |           |
|                     | 365.2274 |           | 365.2274 | 3  | D   | 11 | 1320.663 |           | 1320.663            |           |
|                     | 493.286  |           | 493.286  | 4  | Q   | 10 | 1205.636 |           | 603.3219            | +0.09508  |
|                     | 594.3337 | +0.222207 | 594.3337 | 5  | T   | 9  | 1077.578 | +0.222323 | 539.2926            | -0.180257 |
|                     | 665.3708 | +0.029148 | 665.3708 | 6  | A   | 8  | 976.5302 |           | 976.5302            |           |
| +0.109864           | 390.2105 | +0.066543 | 779.4137 | 7  | N   | 7  | 905.4931 |           | 453.2502            | +0.261919 |
|                     | 876.4665 |           | 876.4665 | 8  | P   | 6  | 791.4501 | +0.019782 | 396.2287            | +0.200314 |
|                     | 963.4985 | +0.20691  | 963.4985 | 9  | S   | 5  | 694.3974 |           | 694.3974            |           |
|                     | 1076.583 | +0.109296 | 1076.583 | 10 | I   | 4  | 607.3653 | +0.027853 | 607.3653            |           |
|                     | 1173.635 |           | 1173.635 | 11 | P   | 3  | 494.2813 | +0.000528 | 494.2813            |           |
|                     | 1287.678 |           | 1287.678 | 12 | N   | 2  | 397.2285 |           | 397.2285            |           |
|                     | 1415.737 |           | 1415.737 | 13 | Q   | 1  | 283.1856 |           | 283.1856            |           |
|                     |          |           |          | 14 | K   | 0  | 155.127  |           | 155.127             |           |

Source: 201205213\_VR\_Bsu\_TripleSILACrep1\_pL2ESLS\_F03  
 Scannumber: 4889  
 Protein: BSU34610; mdxE; yvdG  
 Peptide Score: 154.36  
 Method: ITMS; CID; 3

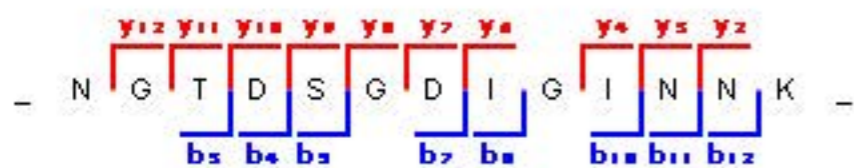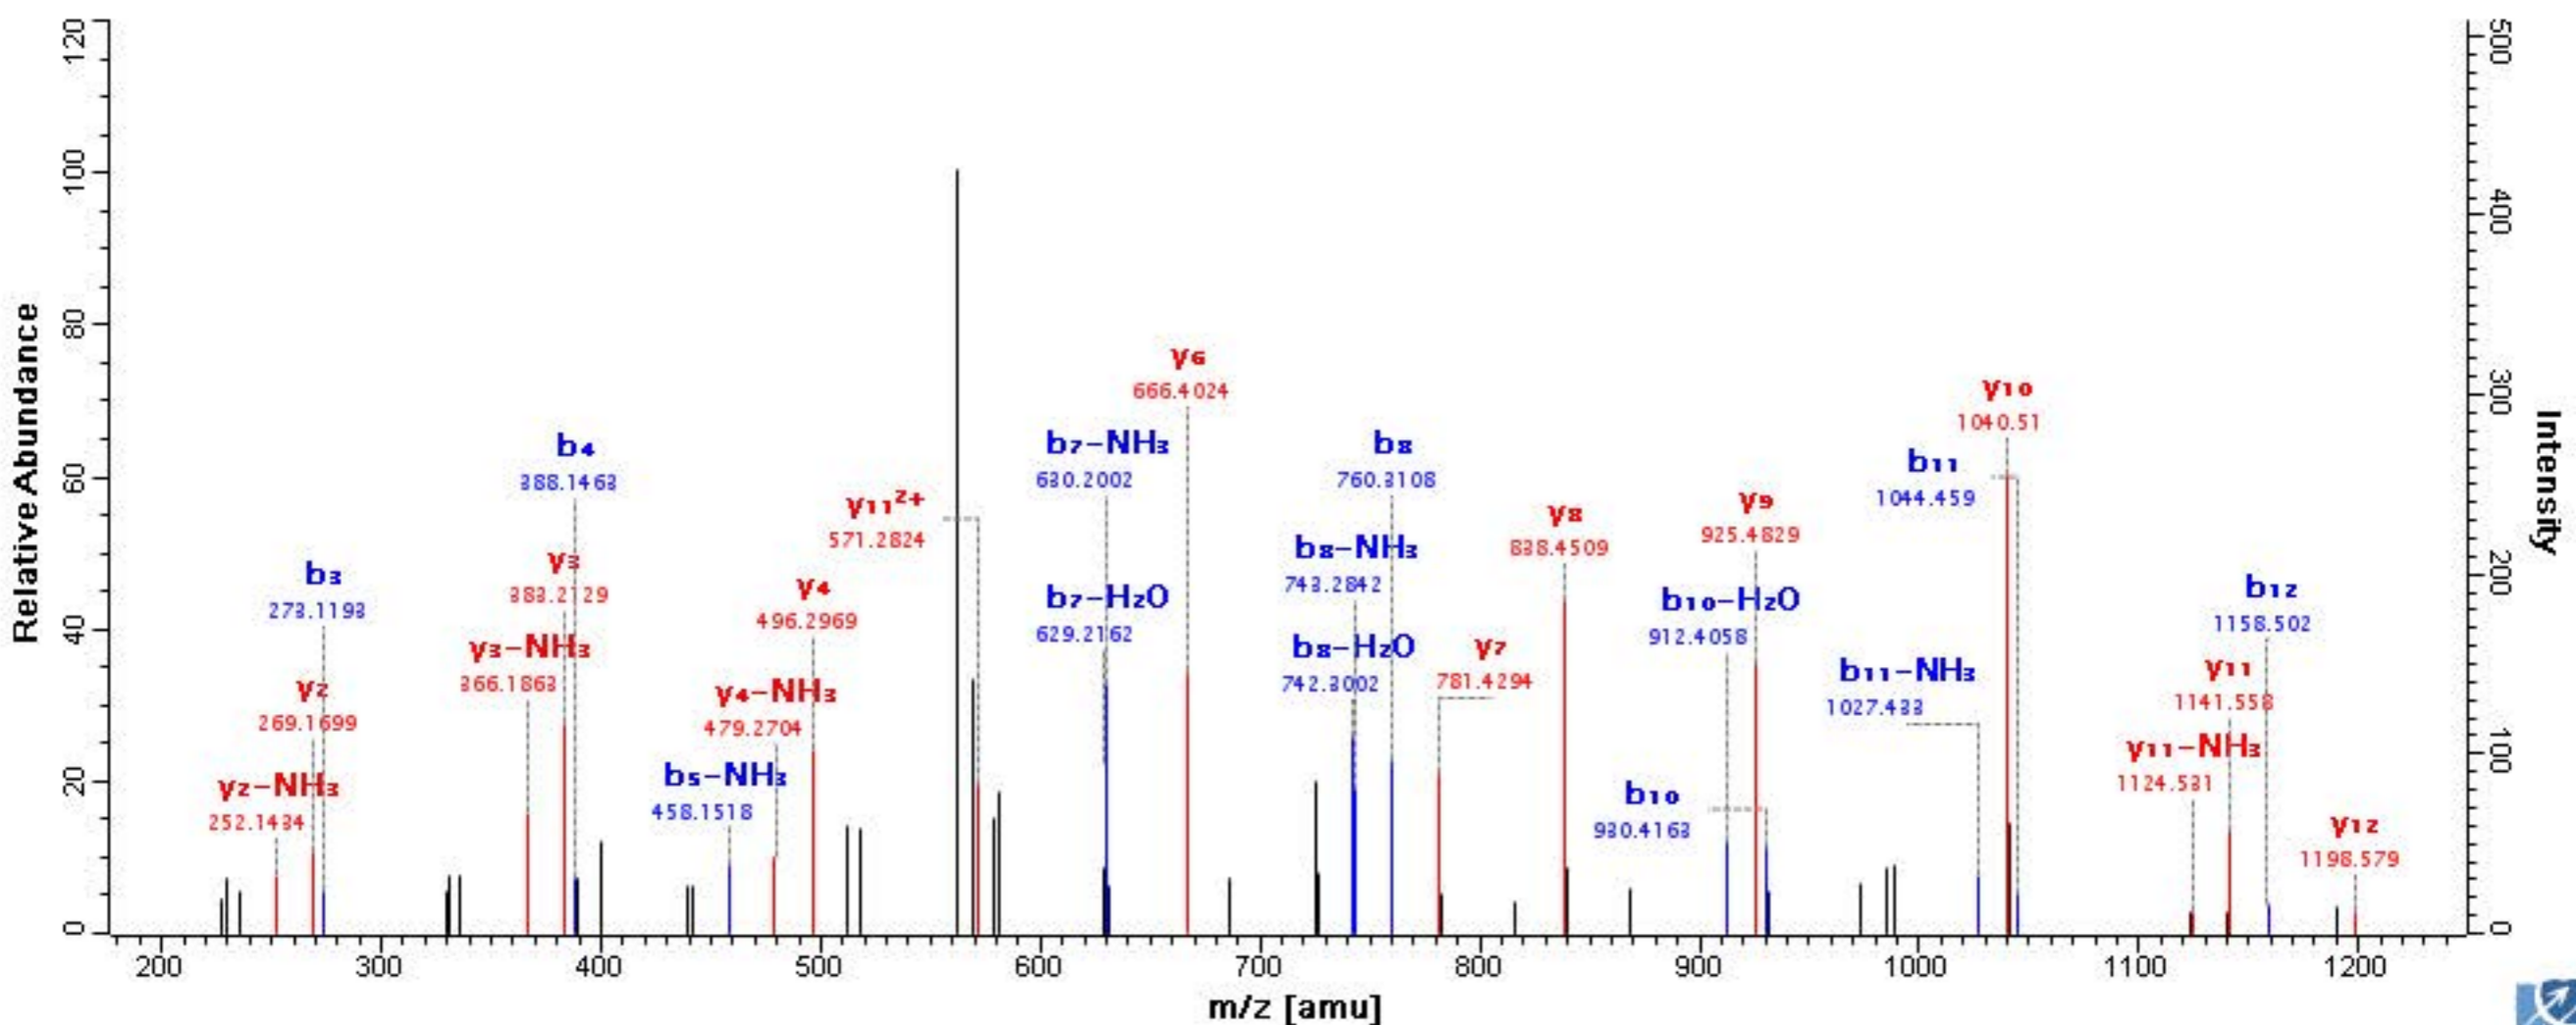

#### precursor information

|                   |                     |
|-------------------|---------------------|
| Mass:             | 0                   |
| m/z:              | System.Collections. |
| Charge:           | System.Collections. |
| Retentiontime:    | System.Collections. |
| Score:            | 154.3569            |
| Mass Error [ppm]: | -1.2093             |
| PEP:              | 5.5784E-62          |
| Precursor Type:   | PEAK                |

#### general information

|                       |             |
|-----------------------|-------------|
| Annotation:           | 10 of 13    |
| AminoAcids Coverage:  | 77 %        |
| Intensity Coverage:   | 56 %        |
| Protein Localisation: | 208 ... 220 |

| b ion      |              |    |     |    | γ ion        |            | γ <sup>2+</sup> ion |            |
|------------|--------------|----|-----|----|--------------|------------|---------------------|------------|
| Δ dalton   | mass         |    | seq |    | Δ dalton     | mass       | Δ dalton            | mass       |
|            | 115.05020391 | 1  | N   | 12 |              |            |                     |            |
|            | 172.07166764 | 2  | G   | 11 | 1198.57897   | -0.0014553 | 1198.57897          |            |
| +0.0871358 | 273.11934611 | 3  | T   | 10 | 1141.5575062 | +0.194569  | 571.28239135        | +0.1229431 |
| +0.1432616 | 388.14628914 | 4  | D   | 9  | 1040.5098278 | -0.0508434 | 1040.5098278        |            |
|            | 475.17831755 | 5  | S   | 8  | 925.48288473 | -0.0478261 | 925.48288473        |            |
|            | 532.19978128 | 6  | G   | 7  | 838.45085632 | -0.1088153 | 838.45085632        |            |
|            | 647.22672431 | 7  | D   | 6  | 781.42939259 | -0.2140606 | 781.42939259        |            |
| -0.0587741 | 760.31078829 | 8  | I   | 5  | 666.40244956 | +0.0789347 | 666.40244956        |            |
|            | 817.33225201 | 9  | G   | 4  | 553.31838558 |            | 553.31838558        |            |
| -0.0693922 | 930.41631599 | 10 | I   | 3  | 496.29692186 | -0.0657207 | 496.29692186        |            |
| +0.2140964 | 1044.4592434 | 11 | N   | 2  | 383.21285788 | -0.1130044 | 383.21285788        |            |
| +0.1571309 | 1158.5021709 | 12 | N   | 1  | 269.16993043 | +0.0614538 | 269.16993043        |            |
|            |              | 13 | K   | 0  | 155.12700298 |            | 155.12700298        |            |

Source: 201205213\_VR\_Bsu\_TripleSILACrep1\_pL2ESLS\_FD4  
 Scannumber: 8526  
 Protein: BSU39700; E83G; idh; iolG  
 Peptide Score: 134.56  
 Method: ITMS; CID; 3

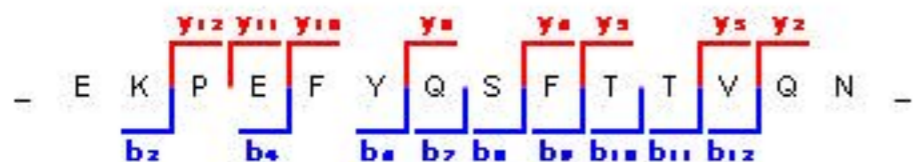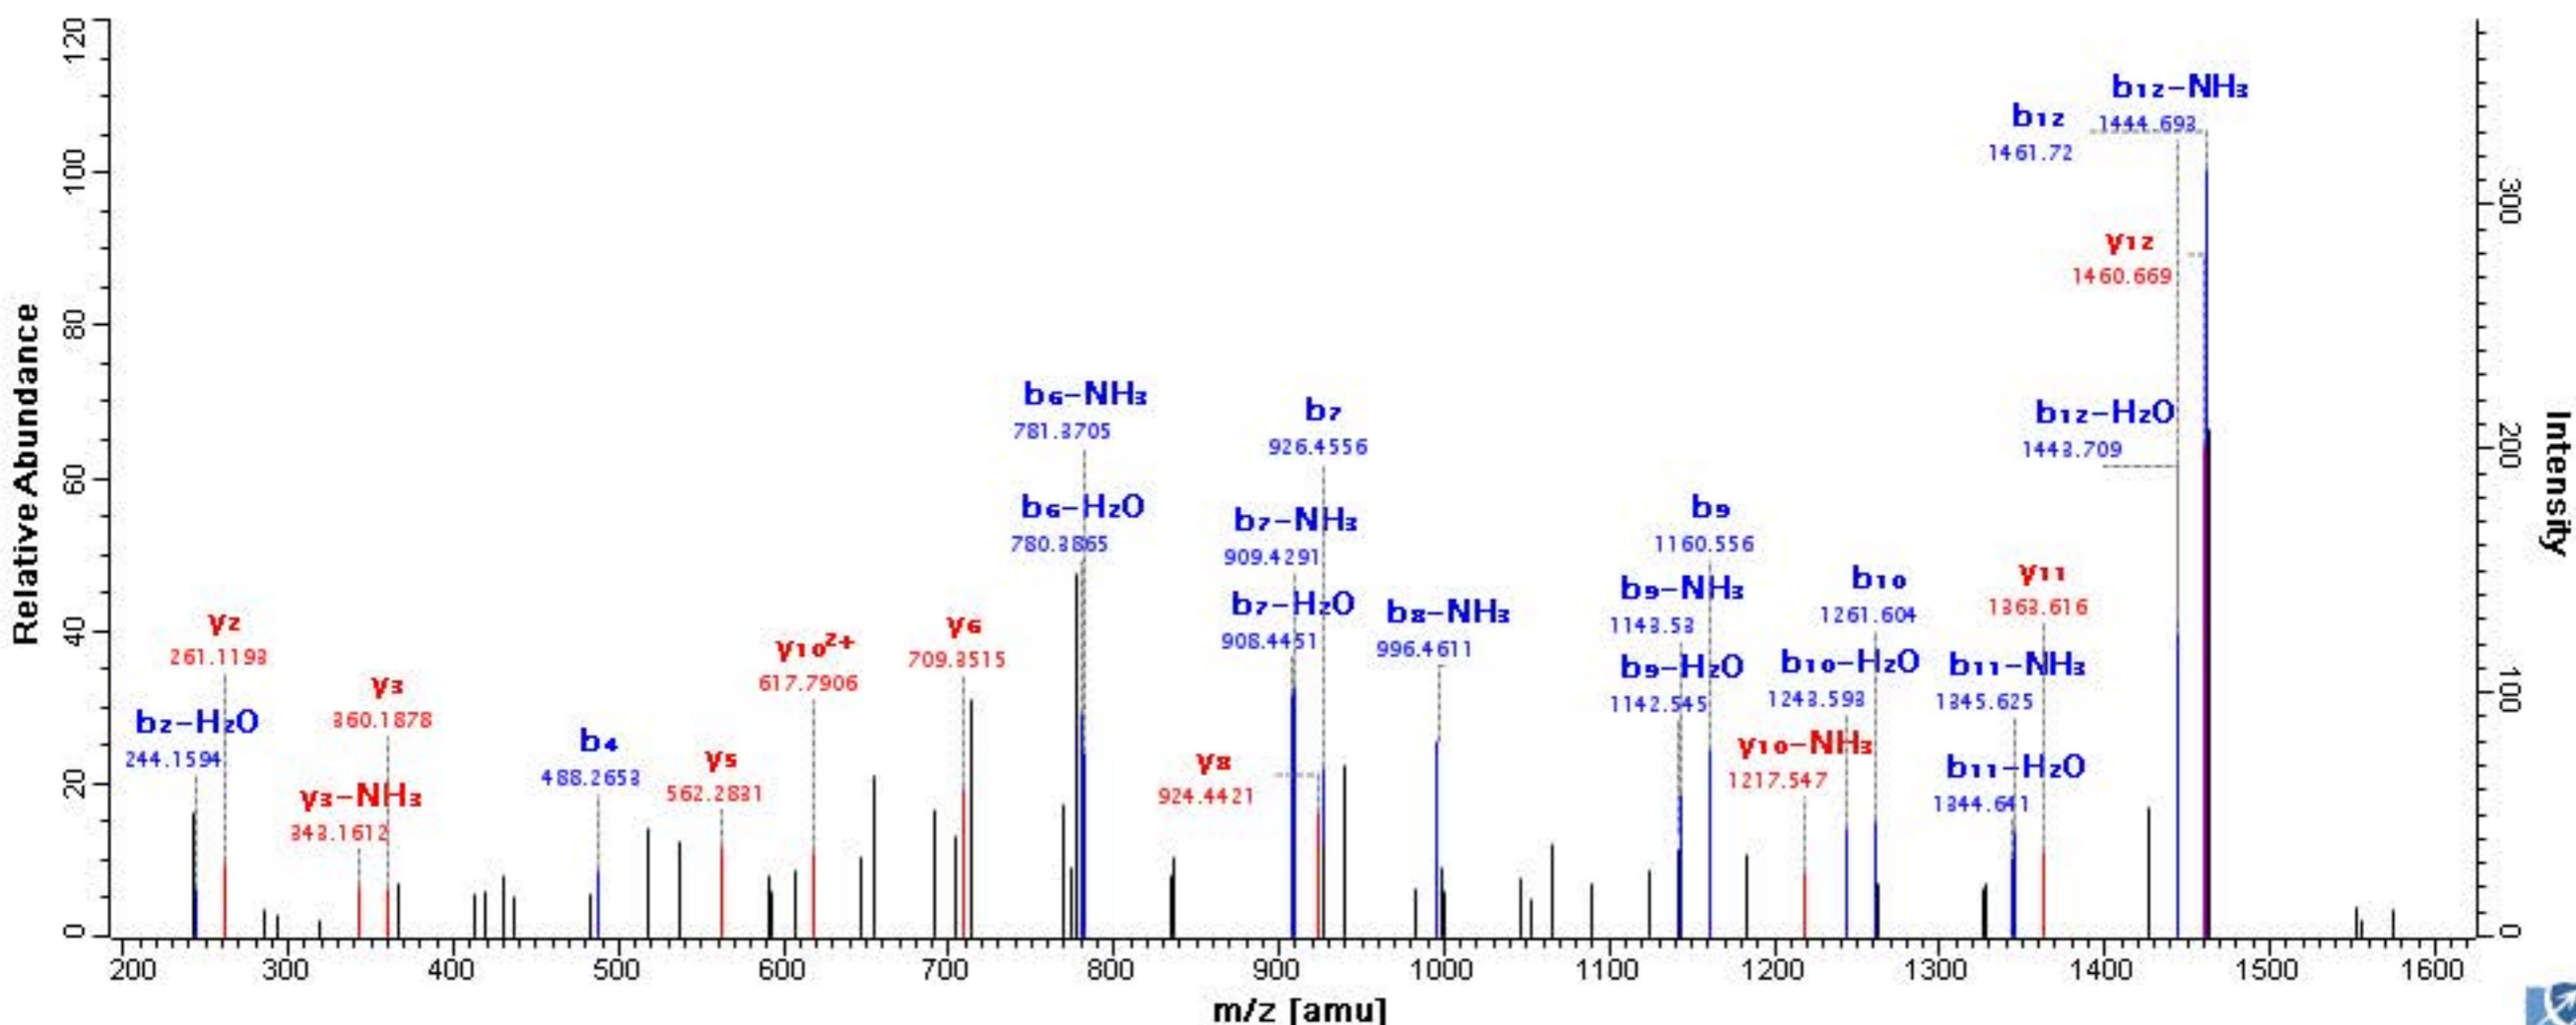

#### precursor information

|                   |                     |
|-------------------|---------------------|
| Mass:             | 1720.82489          |
| m/z:              | System.Collections. |
| Charge:           | System.Collections. |
| Retentiontime:    | System.Collections. |
| Score:            | 134.5619            |
| Mass Error [ppm]: | 0.15373             |
| PEP:              | 0.0021386           |
| Precursor Type:   | ISO                 |

#### general information

|                       |             |
|-----------------------|-------------|
| Annotation:           | 12 of 14    |
| AminoAcids Coverage:  | 86 %        |
| Intensity Coverage:   | 53 %        |
| Protein Localisation: | 331 ... 344 |

| b ion      |              |    |     |    | y ion        |            | y <sup>2+</sup> ion |            |
|------------|--------------|----|-----|----|--------------|------------|---------------------|------------|
| Δ dalton   | mass         |    | seq |    | Δ dalton     | mass       | Δ dalton            | mass       |
|            | 130.04986956 | 1  | E   | 13 |              |            |                     |            |
|            | 262.16993956 | 2  | K   | 12 | 1592.7893062 |            | 1592.7893062        |            |
|            | 359.22270342 | 3  | P   | 11 | 1460.6692362 | -0.017869  | 1460.6692362        |            |
| +0.0191273 | 488.26529651 | 4  | E   | 10 | 1363.6164724 | -0.1563894 | 1363.6164724        |            |
|            | 635.33371043 | 5  | F   | 9  | 1234.5738793 |            | 617.79057787        | -0.3920183 |
|            | 798.39703897 | 6  | Y   | 8  | 1087.5054654 |            | 1087.5054654        |            |
| +0.0202136 | 926.45561648 | 7  | Q   | 7  | 924.44213681 | -0.0288678 | 924.44213681        |            |
|            | 1013.4876449 | 8  | S   | 6  | 796.3835593  |            | 796.3835593         |            |
| -0.1610393 | 1160.5560588 | 9  | F   | 5  | 709.35153089 | -0.1220997 | 709.35153089        |            |
| +0.0604473 | 1261.6037373 | 10 | T   | 4  | 562.28311698 | -0.0907342 | 562.28311698        |            |
|            | 1362.6514158 | 11 | T   | 3  | 461.2354385  |            | 461.2354385         |            |
| +0.0359076 | 1461.7198297 | 12 | V   | 2  | 360.18776003 | +0.0521081 | 360.18776003        |            |
|            | 1589.7784072 | 13 | Q   | 1  | 261.11934611 | -0.0770182 | 261.11934611        |            |
|            |              | 14 | N   | 0  | 133.0607686  |            | 133.0607686         |            |

Source: 201205213\_VR\_Bsu\_TripleSILACrep1\_pL2ESLS\_F06  
 Scannumber: 11534  
 Protein: BSU34570; yvdK  
 Peptide Score: 81  
 Method: ITMS; CID; 3

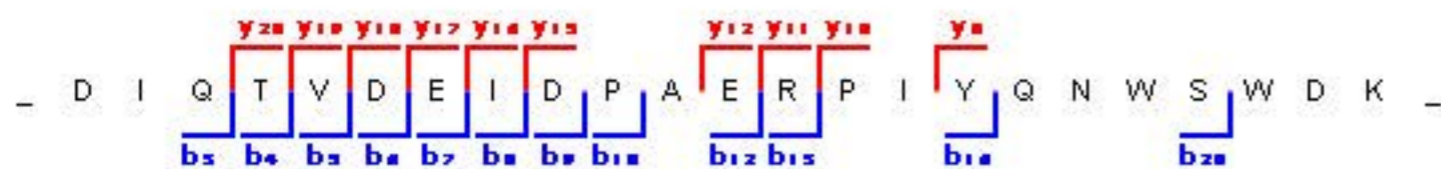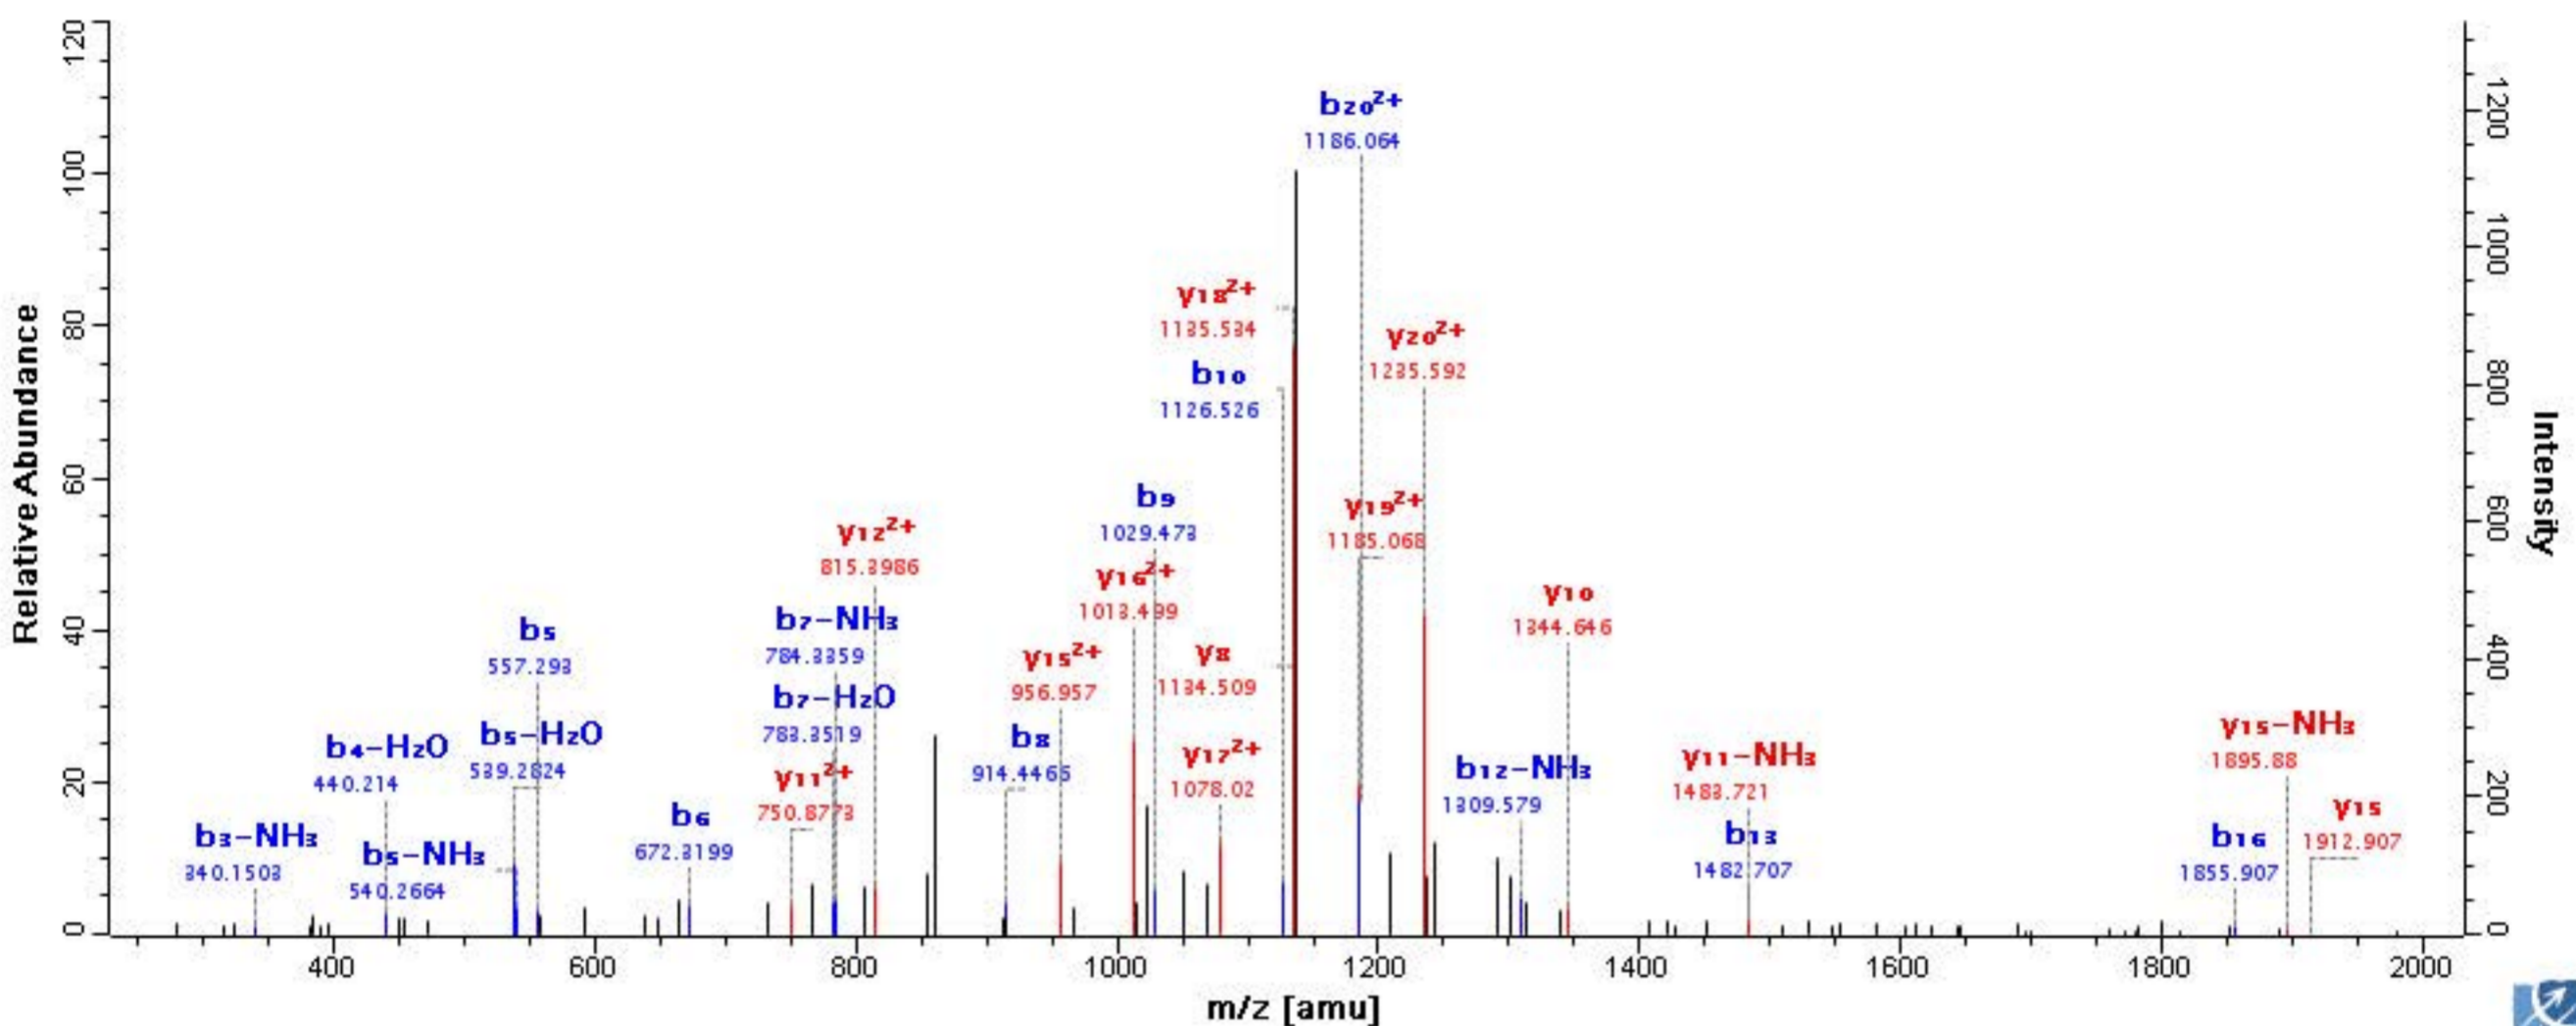

**precursor information**

|                   |                     |
|-------------------|---------------------|
| Mass:             | 2817.32475          |
| m/z:              | System.Collections. |
| Charge:           | System.Collections. |
| Retentiontime:    | System.Collections. |
| Score:            | 81.00344            |
| Mass Error [ppm]: | 0.05791             |
| PEP:              | 3.3981E-05          |
| Precursor Type:   | MULTI               |

| b <sup>2+</sup> ion |          | b ion     |          |    |     |    | y ion    |           | y <sup>2+</sup> ion |           |
|---------------------|----------|-----------|----------|----|-----|----|----------|-----------|---------------------|-----------|
| Δ dalton            | mass     | Δ dalton  | mass     |    | seq |    | Δ dalton | mass      | Δ dalton            | mass      |
|                     | 116.0342 |           | 116.0342 | 1  | D   | 22 |          |           |                     |           |
|                     | 229.1183 |           | 229.1183 | 2  | I   | 21 | 2711.319 |           | 2711.319            |           |
|                     | 357.1769 |           | 357.1769 | 3  | Q   | 20 | 2598.235 |           | 2598.235            |           |
|                     | 458.2245 |           | 458.2245 | 4  | T   | 19 | 2470.176 |           | 1235.592            | +0.401042 |
|                     | 557.293  | -0.019333 | 557.293  | 5  | V   | 18 | 2369.129 |           | 1185.068            | -0.040206 |
|                     | 672.3199 | +0.016957 | 672.3199 | 6  | D   | 17 | 2270.06  |           | 1135.534            | -0.028216 |
|                     | 801.3625 |           | 801.3625 | 7  | E   | 16 | 2155.033 |           | 1078.02             | +0.315089 |
|                     | 914.4466 | -0.064901 | 914.4466 | 8  | I   | 15 | 2025.991 |           | 1013.499            | +0.192648 |
|                     | 1029.473 | -0.272081 | 1029.473 | 9  | D   | 14 | 1912.907 | -0.02727  | 956.957             | +0.122741 |
|                     | 1126.526 | +0.056747 | 1126.526 | 10 | P   | 13 | 1797.88  |           | 1797.88             |           |
|                     | 1197.563 |           | 1197.563 | 11 | A   | 12 | 1700.827 |           | 1700.827            |           |
|                     | 1326.606 |           | 1326.606 | 12 | E   | 11 | 1629.79  |           | 815.3986            | +0.222045 |
|                     | 1482.707 | +0.122267 | 1482.707 | 13 | R   | 10 | 1500.747 |           | 750.8773            | -0.060857 |
|                     | 1579.76  |           | 1579.76  | 14 | P   | 9  | 1344.646 | +0.024515 | 1344.646            |           |
|                     | 1692.844 |           | 1692.844 | 15 | I   | 8  | 1247.593 |           | 1247.593            |           |
|                     | 1855.907 | +0.322013 | 1855.907 | 16 | Y   | 7  | 1134.509 | +0.142788 | 1134.509            |           |
|                     | 1983.966 |           | 1983.966 | 17 | Q   | 6  | 971.4461 |           | 971.4461            |           |
|                     | 2098.009 |           | 2098.009 | 18 | N   | 5  | 843.3875 |           | 843.3875            |           |
|                     | 2284.088 |           | 2284.088 | 19 | W   | 4  | 729.3446 |           | 729.3446            |           |
| -0.33028            | 1186.064 |           | 2371.12  | 20 | S   | 3  | 543.2653 |           | 543.2653            |           |
|                     | 2557.199 |           | 2557.199 | 21 | W   | 2  | 456.2333 |           | 456.2333            |           |
|                     | 2672.226 |           | 2672.226 | 22 | D   | 1  | 270.1539 |           | 270.1539            |           |
|                     |          |           |          | 23 | K   | 0  | 155.127  |           | 155.127             |           |

**general information**

|                       |             |
|-----------------------|-------------|
| Annotation:           | 13 of 23    |
| AminoAcids Coverag    | 57 %        |
| Intensity Coverage:   | 47 %        |
| Protein Localisation: | 558 ... 580 |
