# Supplementary material
Source: PubMed Central journal article supplement (PMC4125730)
Supplement: supp_M113.035949_mcp.M113.035949-7.pdf [file supp_M113.035949_mcp.M113.035949-7.pdf]

Source: 20120529\_VR\_Bsu\_TripleSILAC\_pWTPPrkCPrpC\_F13  
 Scannumber: 3473  
 Protein: BSU16780; rnjB; ymfA  
 Peptide Score: 63.42  
 Method: ITMS; CID; 3

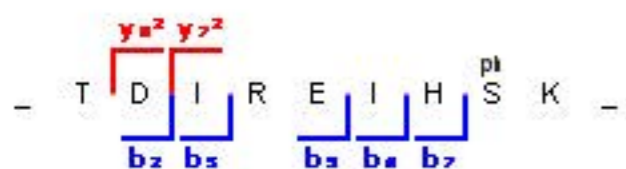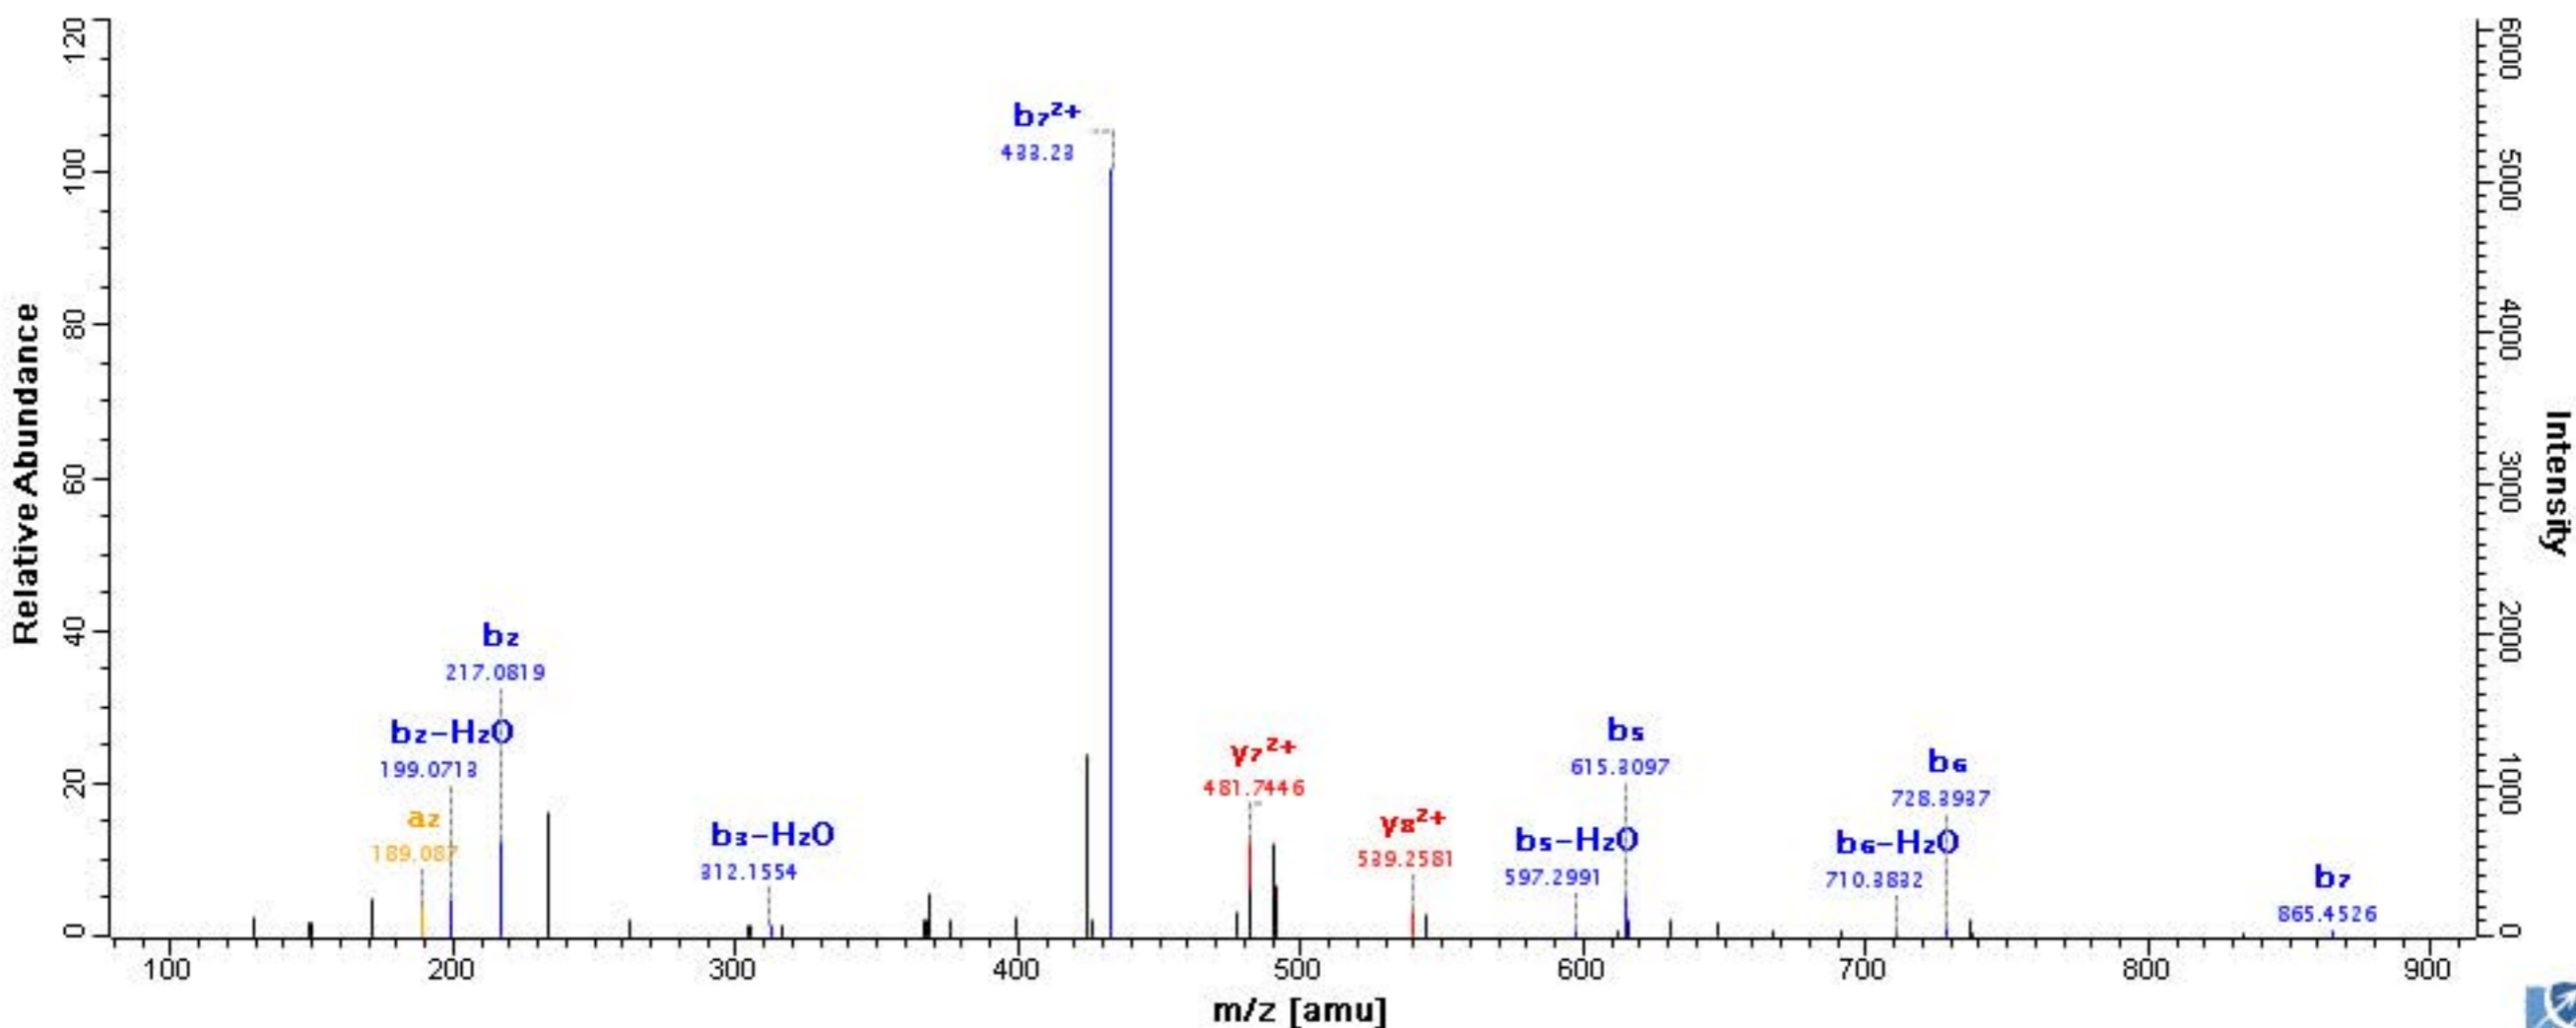

#### precursor information

|                       |                     |
|-----------------------|---------------------|
| Mass:                 | 1177.54943          |
| m/z:                  | System.Collections. |
| Charge:               | System.Collections. |
| Retentiontime:        | System.Collections. |
| Score:                | 63.41883            |
| Mass Error [ppm]:     | 0.15335             |
| PEP:                  | 0.10905             |
| g Precursor Type:     | MULTI               |
| Annotation:           | 5 of 9              |
| AminoAcids Coverage:  | 56 %                |
| Intensity Coverage:   | 56 %                |
| Protein Localisation: | 117 ... 125         |

| a ion    |         | b <sup>2+</sup> ion |         | b ion    |         |   |     |   | y ion    |      | y <sup>2+</sup> ion |          |
|----------|---------|---------------------|---------|----------|---------|---|-----|---|----------|------|---------------------|----------|
| Δ dalton | mass    | Δ dalton            | mass    | Δ dalton | mass    |   | seq |   | Δ dalton | mass | Δ dalton            | mass     |
|          | 74.06   |                     | 102.055 |          | 102.055 | 1 | T   | 8 |          |      |                     |          |
| +0.1229  | 189.087 |                     | 217.082 | +0.0546  | 217.082 | 2 | D   | 7 | 1077.51  |      | 539.258             | +0.11578 |
|          | 302.171 |                     | 330.166 |          | 330.166 | 3 | I   | 6 | 962.482  |      | 481.745             | -0.23    |
|          | 458.272 |                     | 486.267 |          | 486.267 | 4 | R   | 5 | 849.398  |      | 849.398             |          |
|          | 587.315 |                     | 615.31  | +0.0971  | 615.31  | 5 | E   | 4 | 693.297  |      | 693.297             |          |
|          | 700.399 |                     | 728.394 | +0.2207  | 728.394 | 6 | I   | 3 | 564.254  |      | 564.254             |          |
|          | 837.458 | -0.2797             | 433.23  | -0.0324  | 865.453 | 7 | H   | 2 | 451.17   |      | 451.17              |          |
|          | 1004.46 |                     | 1032.45 |          | 1032.45 | 8 | S   | 1 | 314.111  |      | 314.111             |          |
|          |         |                     |         |          |         | 9 | K   | 0 | 147.113  |      | 147.113             |          |

Source: 201 20529\_VR\_Bsu\_TripleSILAC\_pWTPPrkCPrpC\_F13  
 Scannumber: 5401  
 Protein: BSU40060; gntK  
 Peptide Score: 57.97  
 Method: ITMS; CID; 3

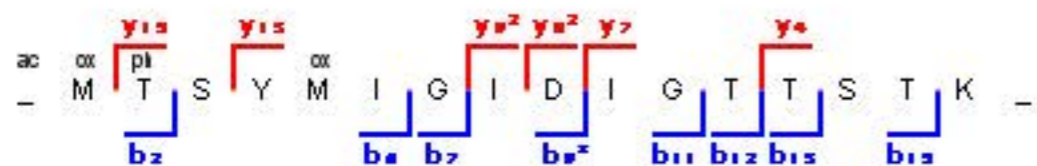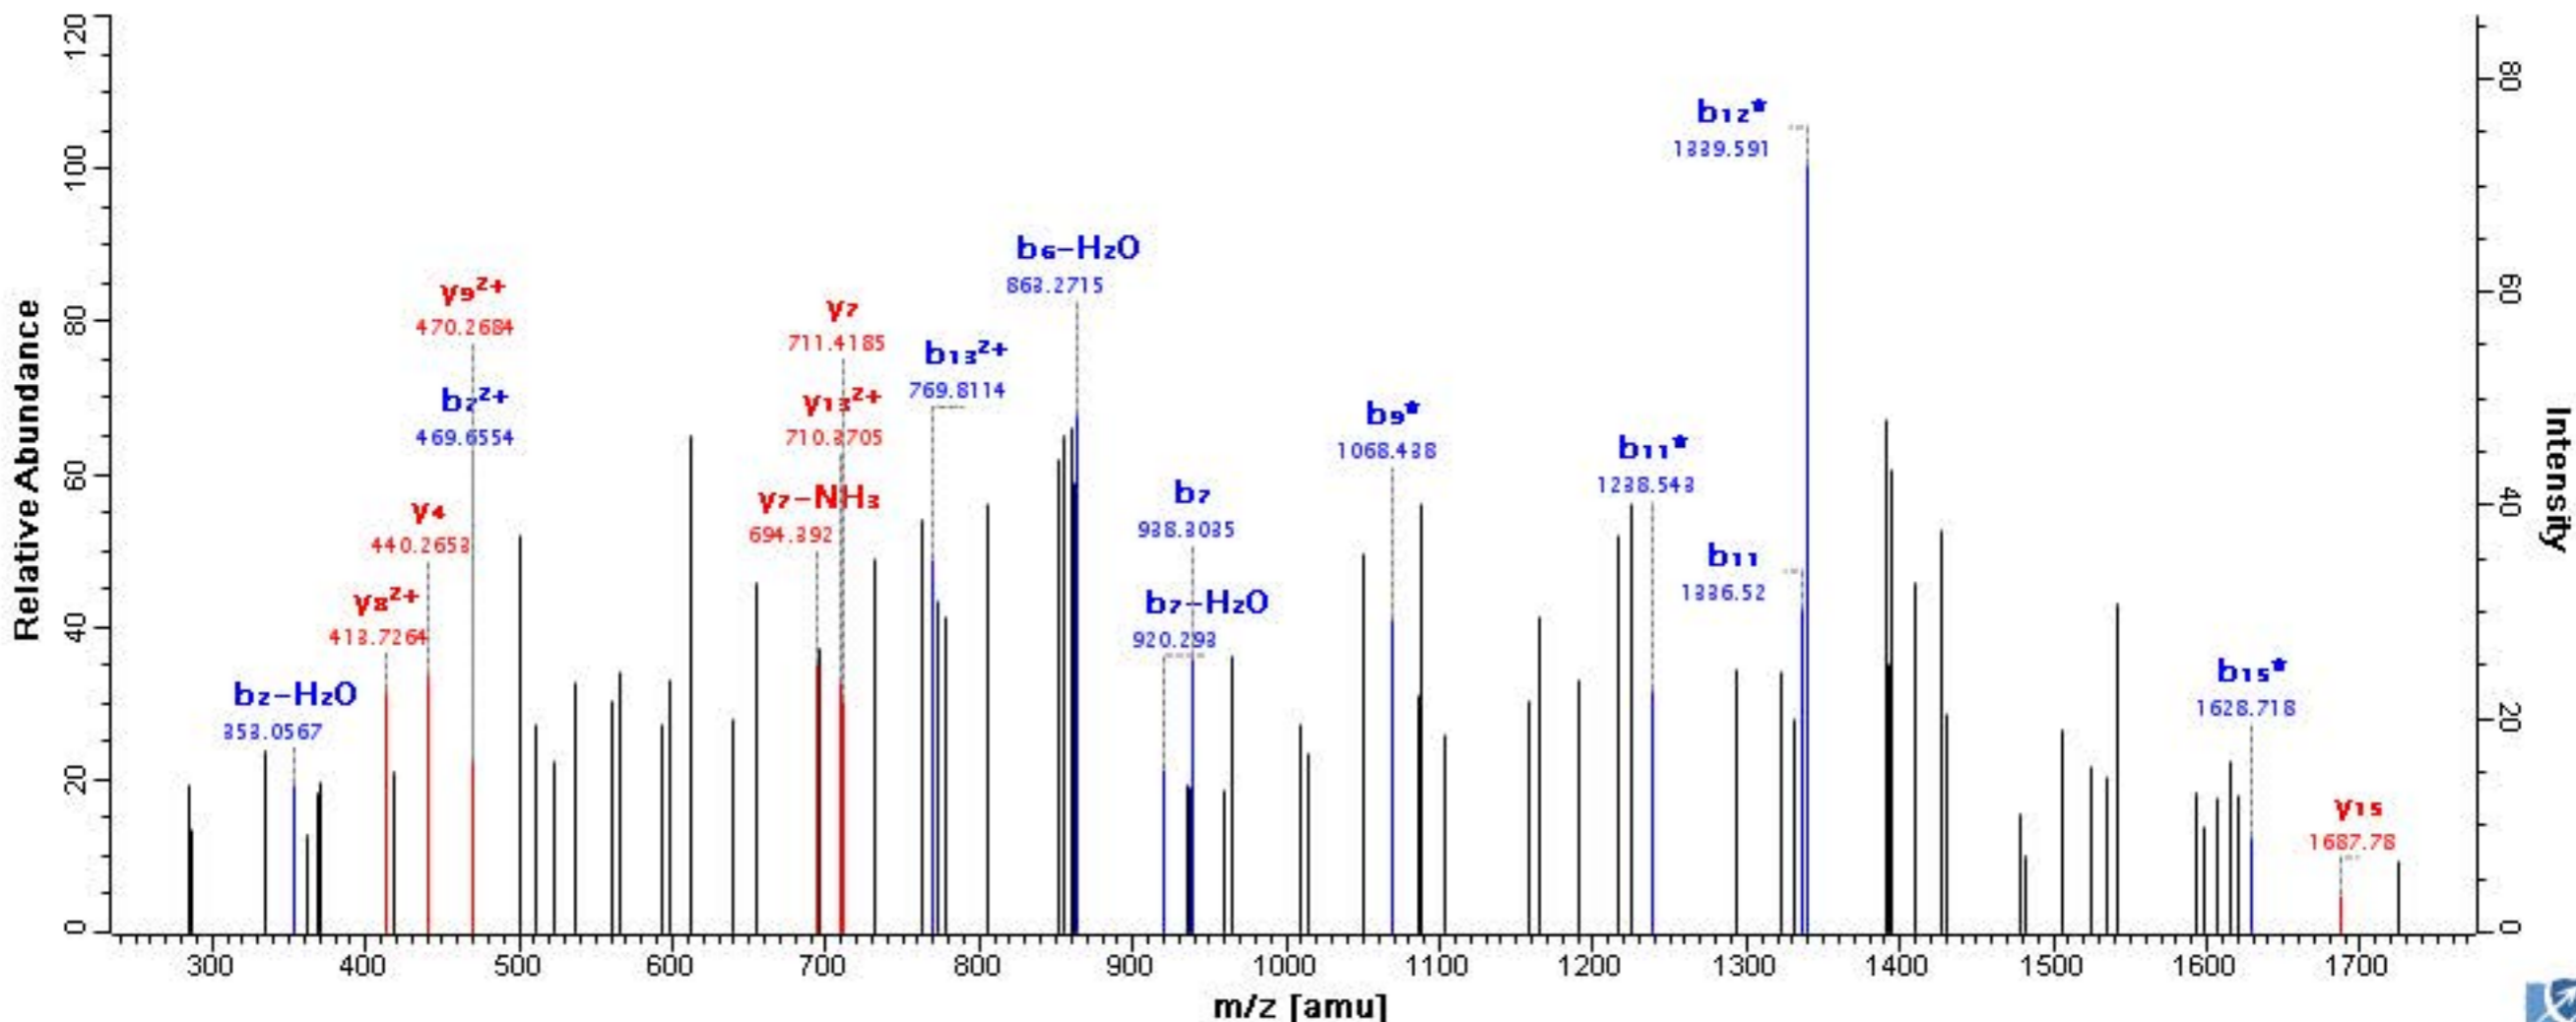

#### precursor information

|                   |                     |
|-------------------|---------------------|
| Mass:             | 0                   |
| m/z:              | System.Collections. |
| Charge:           | System.Collections. |
| Retentiontime:    | System.Collections. |
| Score:            | 57.97267            |
| Mass Error [ppm]: | 5.6828              |
| PEP:              | 0.023751            |
| Precursor Type:   | PEAK                |

| b <sup>2+</sup> ion |          | b ion     |          |     | y ion |          | y <sup>2+</sup> ion |           |          |
|---------------------|----------|-----------|----------|-----|-------|----------|---------------------|-----------|----------|
| Δ dalton            | mass     | Δ dalton  | mass     | seq |       | Δ dalton | mass                | Δ dalton  | mass     |
|                     | 190.0532 |           | 190.0532 | 1   | M     | 15       |                     |           |          |
|                     | 371.0672 |           | 371.0672 | 2   | T     | 14       | 1687.78             | +0.114485 | 1687.78  |
|                     | 458.0993 |           | 458.0993 | 3   | S     | 13       | 1506.766            |           | 1506.766 |
|                     | 621.1626 |           | 621.1626 | 4   | Y     | 12       | 1419.734            |           | 710.3705 |
|                     | 768.198  |           | 768.198  | 5   | M     | 11       | 1256.67             |           | 1256.67  |
|                     | 881.2821 |           | 881.2821 | 6   | I     | 10       | 1109.635            |           | 1109.635 |
| -0.420847           | 469.6554 | +0.10174  | 938.3035 | 7   | G     | 9        | 996.551             |           | 996.551  |
|                     | 1051.388 |           | 1051.388 | 8   | I     | 8        | 939.5295            |           | 470.2684 |
|                     | 1166.415 |           | 1166.415 | 9   | D     | 7        | 826.4454            |           | 413.7264 |
|                     | 1279.499 |           | 1279.499 | 10  | I     | 6        | 711.4185            | +0.047012 | 711.4185 |
|                     | 1336.52  | +0.216626 | 1336.52  | 11  | G     | 5        | 598.3344            |           | 598.3344 |
|                     | 1437.568 |           | 1437.568 | 12  | T     | 4        | 541.313             |           | 541.313  |
| +0.387441           | 769.8114 |           | 1538.615 | 13  | T     | 3        | 440.2653            | -0.026161 | 440.2653 |
|                     | 1625.647 |           | 1625.647 | 14  | S     | 2        | 339.2176            |           | 339.2176 |
|                     | 1726.695 |           | 1726.695 | 15  | T     | 1        | 252.1856            |           | 252.1856 |
|                     |          |           |          | 16  | K     | 0        | 151.1379            |           | 151.1379 |

#### general information

|                       |          |
|-----------------------|----------|
| Annotation:           | 12 of 16 |
| AminoAcids Coverag    | 75 %     |
| Intensity Coverage:   | 21 %     |
| Protein Localisation: | 1 ... 16 |

Source: 20120529\_VR\_Bsu\_TripleSILAC\_pWTPPrkCPrpC\_F13  
 Scannumber: 5576  
 Protein: atpF; BSU36850  
 Peptide Score: 57.6  
 Method: ITMS; CID; 3

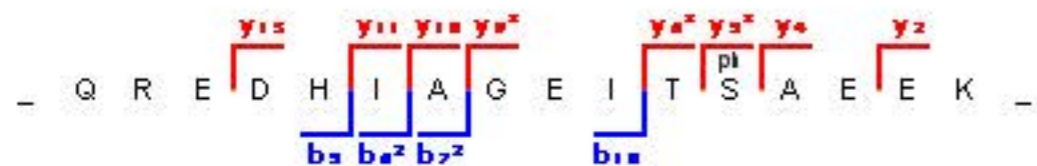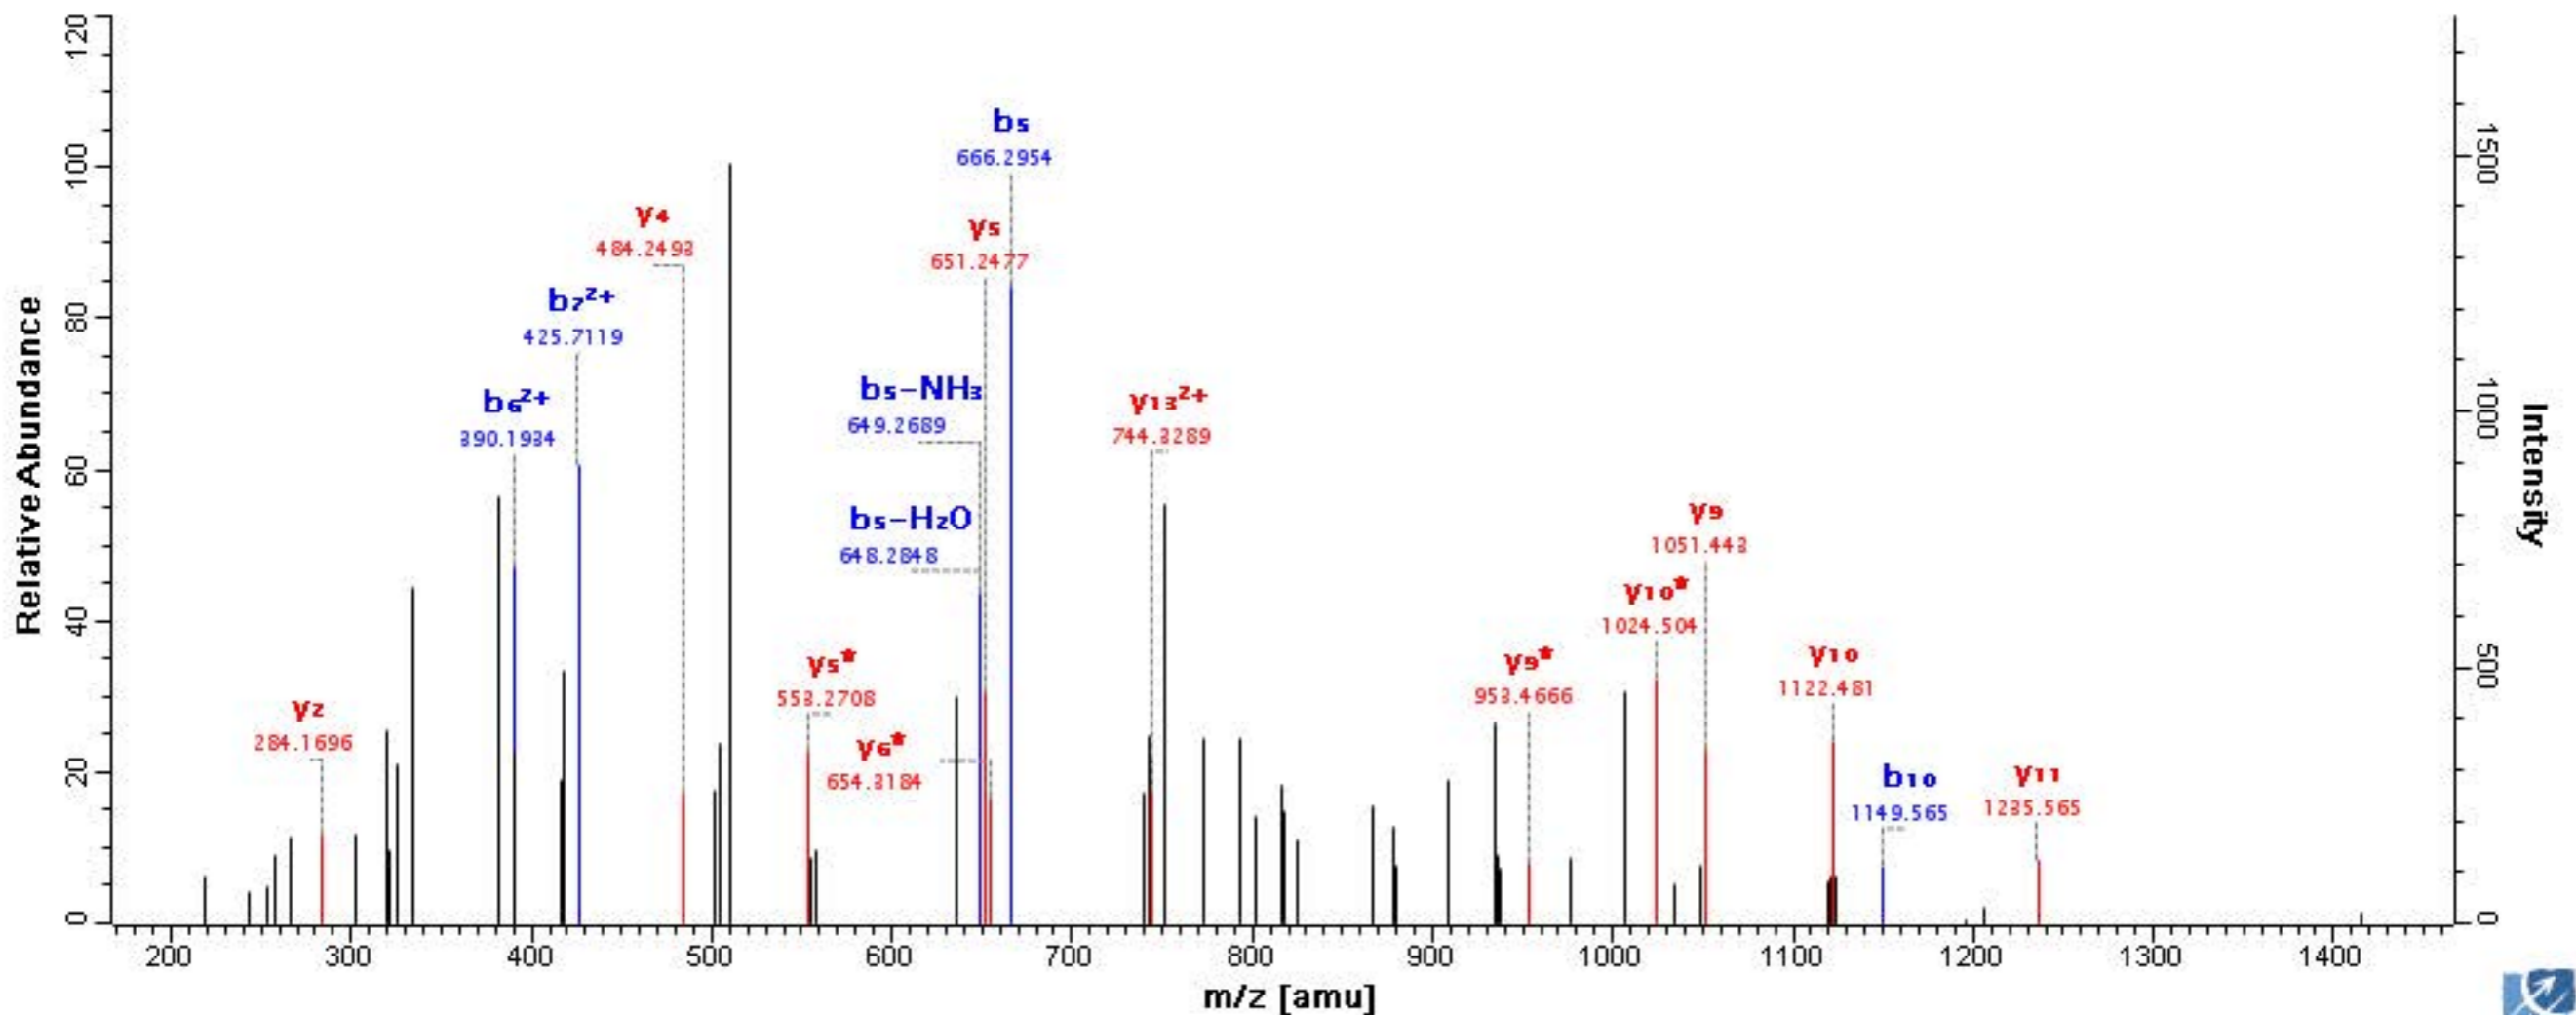

#### precursor information

|                   |                     |
|-------------------|---------------------|
| Mass:             | 1891.83119          |
| m/z:              | System.Collections. |
| Charge:           | System.Collections. |
| Retentiontime:    | System.Collections. |
| Score:            | 57.59521            |
| Mass Error [ppm]: | -0.055498           |
| PEP:              | 0.016173            |
| Precursor Type:   | MULTI               |

| b <sup>2+</sup> ion |          | b ion     |          |     | y ion |          | y <sup>2+</sup> ion |           |          |
|---------------------|----------|-----------|----------|-----|-------|----------|---------------------|-----------|----------|
| Δ dalton            | mass     | Δ dalton  | mass     | seq |       | Δ dalton | mass                | Δ dalton  | mass     |
|                     | 129.0659 |           | 129.0659 | 1   | Q     | 15       |                     |           |          |
|                     | 285.167  |           | 285.167  | 2   | R     | 14       | 1772.794            |           | 1772.794 |
|                     | 414.2096 |           | 414.2096 | 3   | E     | 13       | 1616.693            |           | 1616.693 |
|                     | 529.2365 |           | 529.2365 | 4   | D     | 12       | 1487.65             |           | 744.3289 |
|                     | 666.2954 | +0.026425 | 666.2954 | 5   | H     | 11       | 1372.624            |           | 1372.624 |
| +0.014631           | 390.1934 |           | 779.3795 | 6   | I     | 10       | 1235.565            | +0.112119 | 1235.565 |
| +0.336406           | 425.7119 |           | 850.4166 | 7   | A     | 9        | 1122.481            | +0.037003 | 1122.481 |
|                     | 907.4381 |           | 907.4381 | 8   | G     | 8        | 1051.443            | +0.148092 | 1051.443 |
|                     | 1036.481 |           | 1036.481 | 9   | E     | 7        | 994.422             |           | 994.422  |
|                     | 1149.565 | +0.247788 | 1149.565 | 10  | I     | 6        | 865.3794            |           | 865.3794 |
|                     | 1250.612 |           | 1250.612 | 11  | T     | 5        | 752.2953            |           | 752.2953 |
|                     | 1417.611 |           | 1417.611 | 12  | S     | 4        | 651.2477            | +0.086994 | 651.2477 |
|                     | 1488.648 |           | 1488.648 | 13  | A     | 3        | 484.2493            | +0.01974  | 484.2493 |
|                     | 1617.69  |           | 1617.69  | 14  | E     | 2        | 413.2122            |           | 413.2122 |
|                     | 1746.733 |           | 1746.733 | 15  | E     | 1        | 284.1696            | +0.132894 | 284.1696 |
|                     |          |           |          | 16  | K     | 0        | 155.127             |           | 155.127  |

#### general information

|                       |           |
|-----------------------|-----------|
| Annotation:           | 10 of 16  |
| AminoAcids Coverag    | 62 %      |
| Intensity Coverage:   | 35 %      |
| Protein Localisation: | 45 ... 60 |

Source: 201 20529\_VR\_Bsu\_TripleSILAC\_pWTPrkCPrpC\_F15  
 Scannumber: 7467  
 Protein: BSU35720; rodC; tag3; tagF  
 Peptide Score: 98.27  
 Method: ITMS; CID; 3

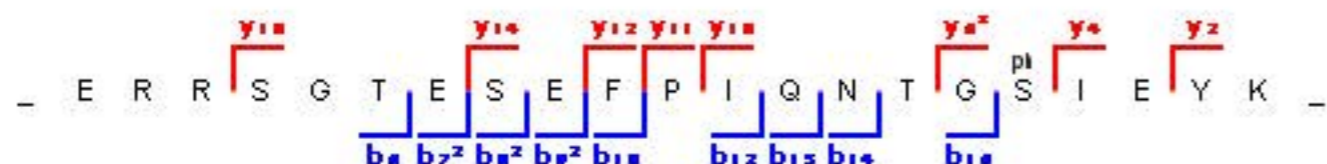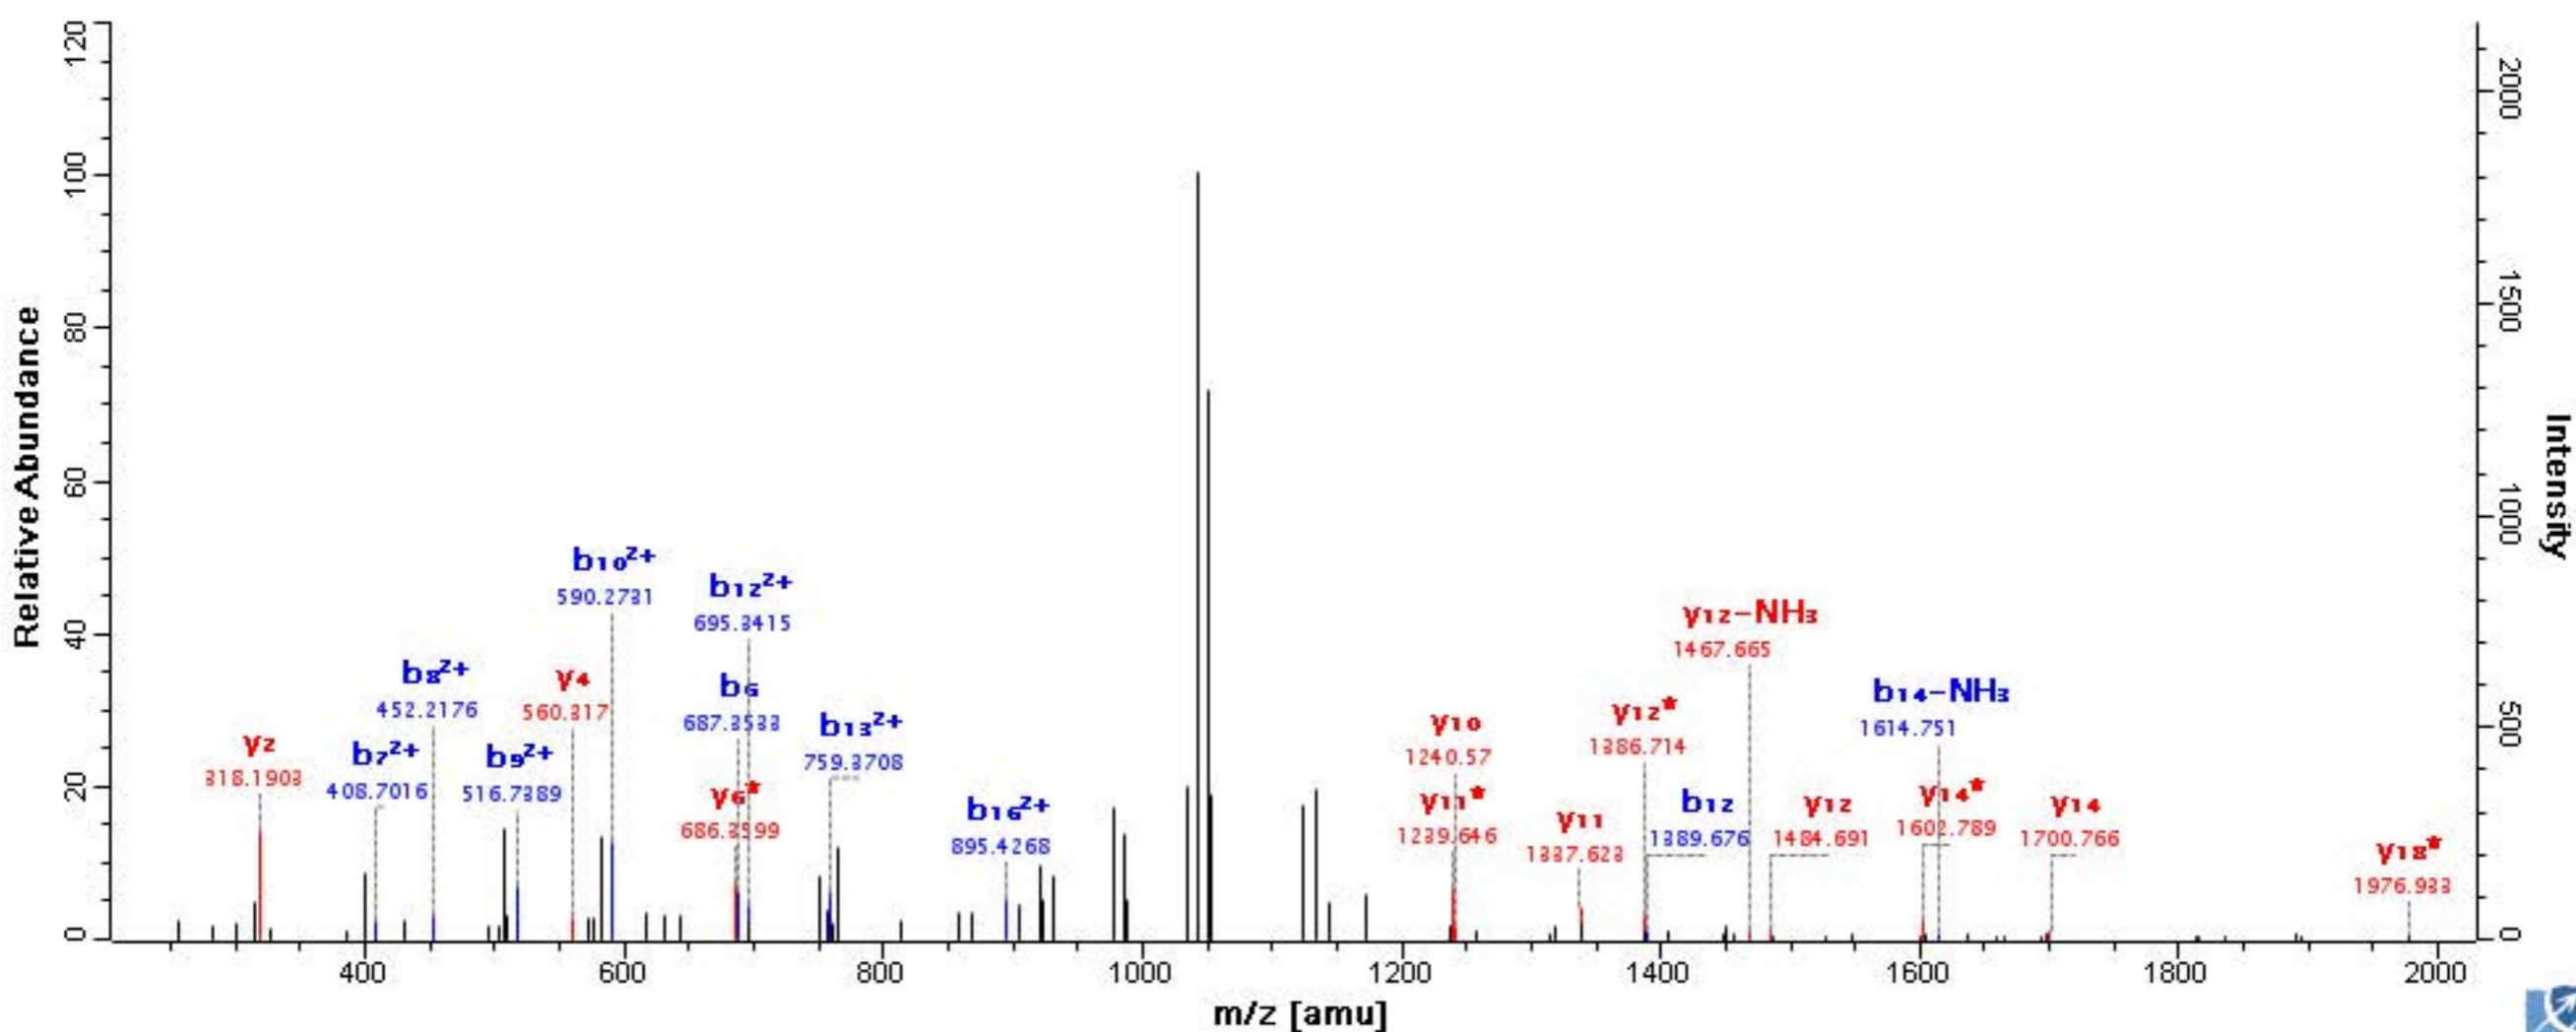

#### precursor information

|                   |                     |
|-------------------|---------------------|
| Mass:             | 2507.13314          |
| m/z:              | System.Collections. |
| Charge:           | System.Collections. |
| Retentiontime:    | System.Collections. |
| Score:            | 98.26882            |
| Mass Error [ppm]: | 0.070058            |
| PEP:              | 1.7653E-10          |
| Precursor Type:   | MULTI               |

| b <sup>2+</sup> ion |              | b ion      |              |     | γ ion |          |              |
|---------------------|--------------|------------|--------------|-----|-------|----------|--------------|
| Δ dalton            | mass         | Δ dalton   | mass         | seq |       | Δ dalton | mass         |
|                     | 130.04986956 |            | 130.04986956 | 1   | E     | 20       |              |
|                     | 286.15098059 |            | 286.15098059 | 2   | R     | 19       | 2387.1118436 |
|                     | 442.25209162 |            | 442.25209162 | 3   | R     | 18       | 2231.0107326 |
|                     | 529.28412003 |            | 529.28412003 | 4   | S     | 17       | 2074.9096215 |
|                     | 586.30558375 |            | 586.30558375 | 5   | G     | 16       | 1987.8775931 |
|                     | 687.35326223 | -0.2061065 | 687.35326223 | 6   | T     | 15       | 1930.8561294 |
| +0.0575283          | 408.70156589 |            | 816.39585532 | 7   | E     | 14       | 1829.8084509 |
| +0.3137309          | 452.2175801  |            | 903.42788373 | 8   | S     | 13       | 1700.7658578 |
| +0.4420926          | 516.73887665 |            | 1032.4704768 | 9   | E     | 12       | 1613.7338294 |
| +0.1704589          | 590.27308361 |            | 1179.5388907 | 10  | F     | 11       | 1484.6912363 |
|                     | 1276.5916546 |            | 1276.5916546 | 11  | P     | 10       | 1337.6228224 |
| +0.3914737          | 695.34149752 | +0.1832902 | 1389.6757186 | 12  | I     | 9        | 1240.5700586 |
| +0.4021629          | 759.37078628 |            | 1517.7342961 | 13  | Q     | 8        | 1127.4859946 |
|                     | 1631.7772235 |            | 1631.7772235 | 14  | N     | 7        | 999.42741706 |
|                     | 1732.824902  |            | 1732.824902  | 15  | T     | 6        | 885.38448961 |
| +0.2064186          | 895.4268211  |            | 1789.8463657 | 16  | G     | 5        | 784.33681114 |
|                     | 1956.8447246 |            | 1956.8447246 | 17  | S     | 4        | 727.31534742 |
|                     | 2069.9287885 |            | 2069.9287885 | 18  | I     | 3        | 560.3169886  |
|                     | 2198.9713816 |            | 2198.9713816 | 19  | E     | 2        | 447.23292462 |
|                     | 2362.0347102 |            | 2362.0347102 | 20  | Y     | 1        | 318.19033152 |
|                     |              |            |              | 21  | K     | 0        | 155.12700298 |

#### general information

|                       |           |
|-----------------------|-----------|
| Annotation:           | 13 of 21  |
| AminoAcids Coverag    | 62 %      |
| Intensity Coverage:   | 16 %      |
| Protein Localisation: | 70 ... 90 |

Source: 201 20529\_VR\_Bsu\_TripleSILAC\_pWTPPrkCPrpC\_F17  
 Scannumber: 4044  
 Protein: BSU01130; tuf; tufA  
 Peptide Score: 109.35  
 Method: ITMS; CID; 3

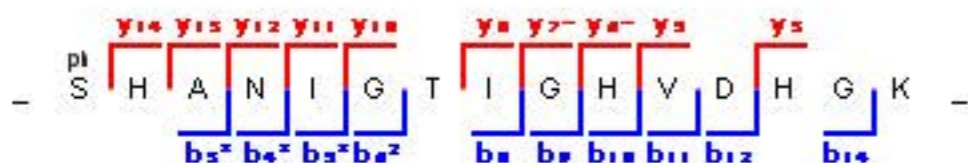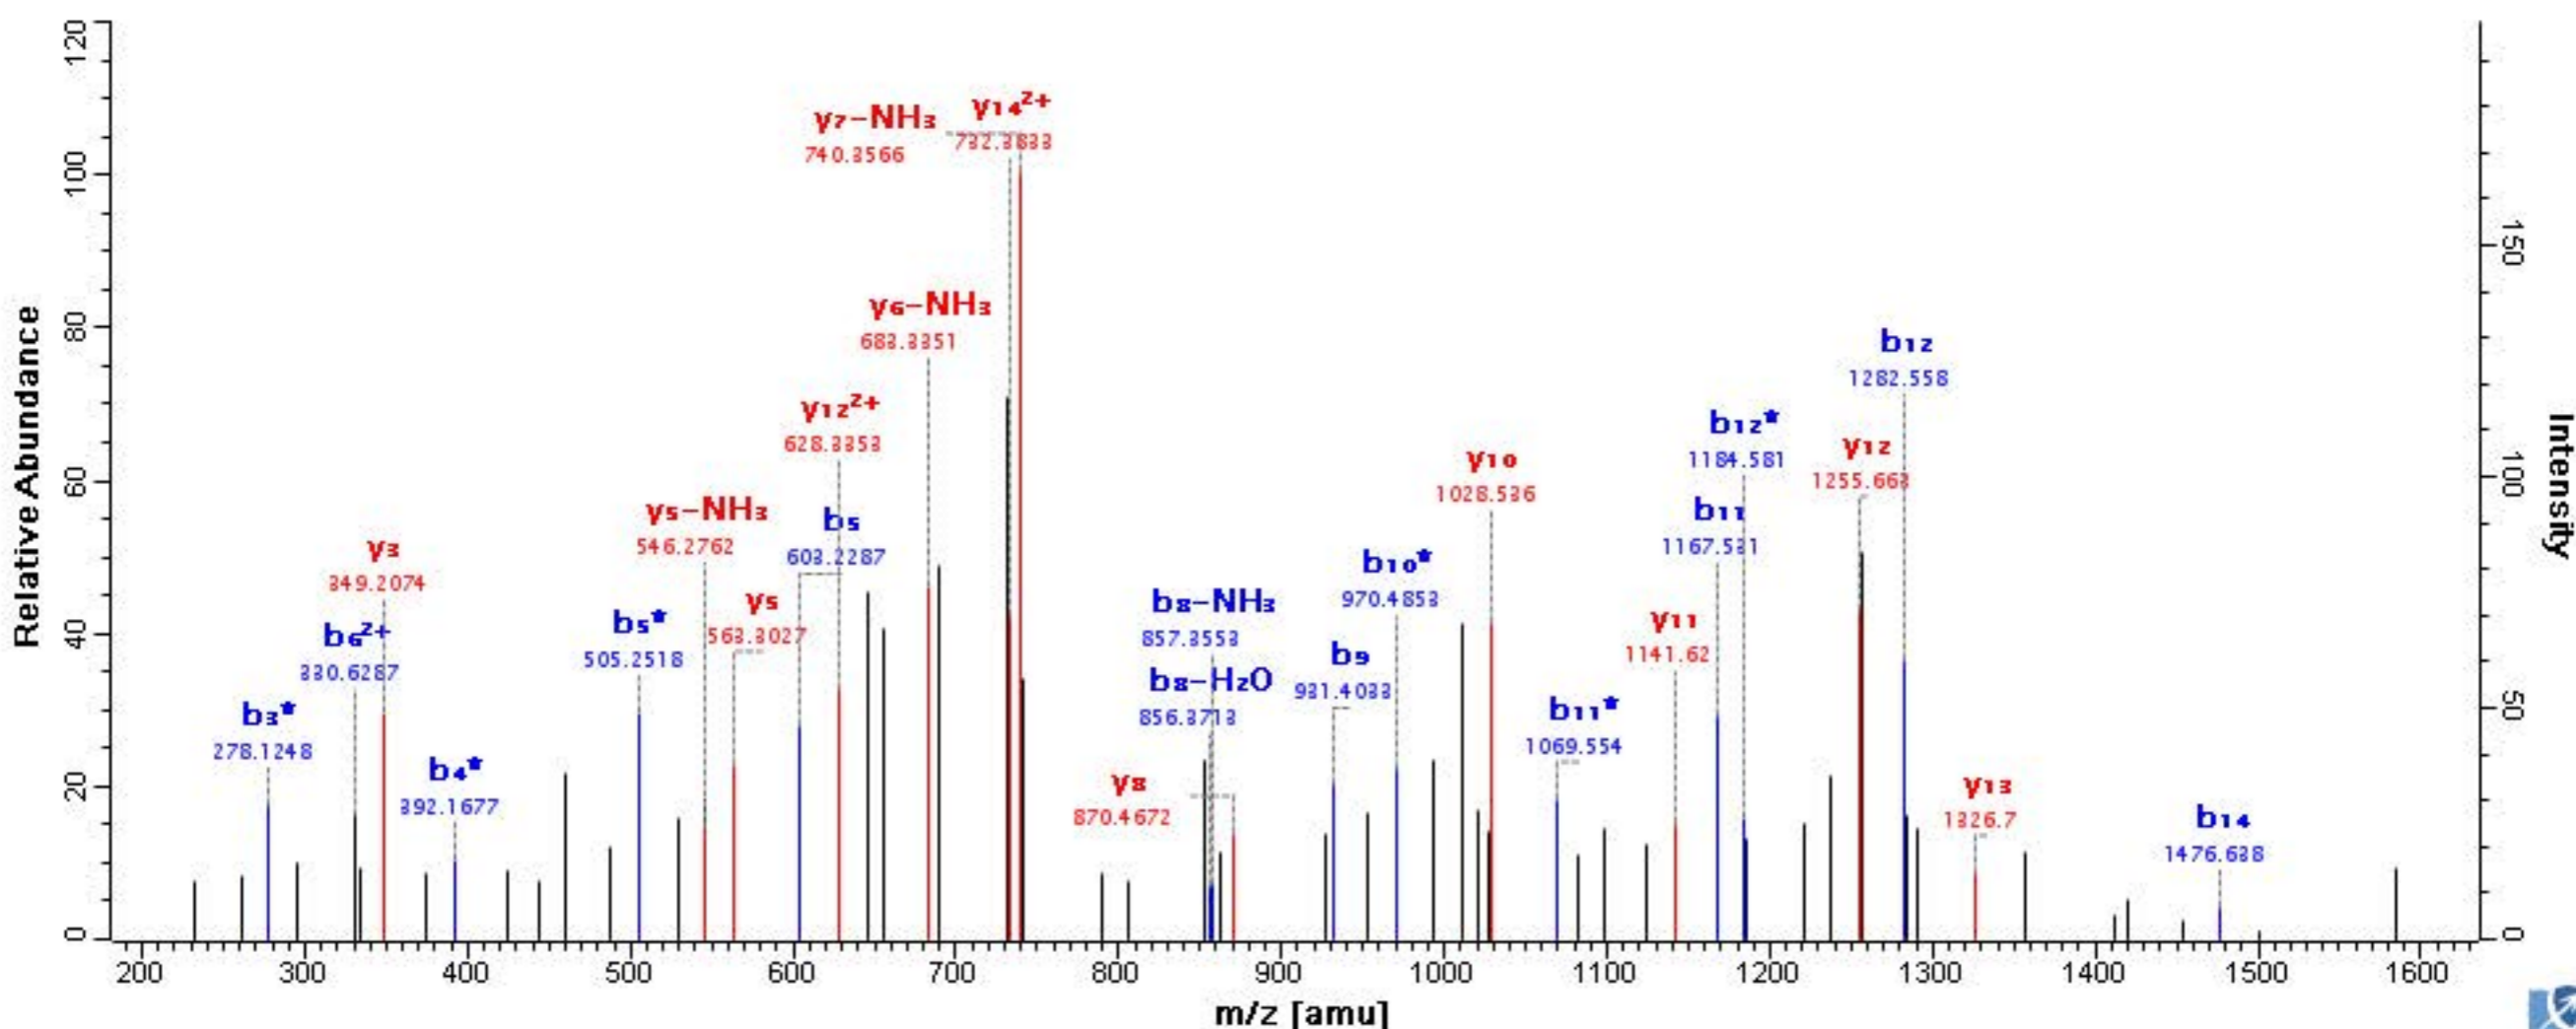

#### precursor information

|                   |                     |
|-------------------|---------------------|
| Mass:             | 1621.73672          |
| m/z:              | System.Collections. |
| Charge:           | System.Collections. |
| Retentiontime:    | System.Collections. |
| Score:            | 109.352             |
| Mass Error [ppm]: | 0.30957             |
| PEP:              | 5.0653E-07          |
| Precursor Type:   | MULTI               |

| b <sup>2+</sup> ion |          | b ion     |          | seq |   |    | γ ion    |           | γ <sup>2+</sup> ion |           |
|---------------------|----------|-----------|----------|-----|---|----|----------|-----------|---------------------|-----------|
| Δ dalton            | mass     | Δ dalton  | mass     |     |   |    | Δ dalton | mass      | Δ dalton            | mass      |
|                     | 168.0056 |           | 168.0056 | 1   | S | 14 |          |           |                     |           |
|                     | 305.0645 |           | 305.0645 | 2   | H | 13 | 1463.759 |           | 732.3833            | +0.026485 |
|                     | 376.1017 |           | 376.1017 | 3   | A | 12 | 1326.7   | +0.037126 | 1326.7              |           |
|                     | 490.1446 |           | 490.1446 | 4   | N | 11 | 1255.663 | -0.075174 | 628.3353            | +0.140293 |
|                     | 603.2287 | +0.410081 | 603.2287 | 5   | I | 10 | 1141.62  | -0.055318 | 1141.62             |           |
| -0.249271           | 330.6287 |           | 660.2501 | 6   | G | 9  | 1028.536 | +0.157286 | 1028.536            |           |
|                     | 761.2978 |           | 761.2978 | 7   | T | 8  | 971.5149 |           | 971.5149            |           |
|                     | 874.3819 |           | 874.3819 | 8   | I | 7  | 870.4672 | +0.024707 | 870.4672            |           |
|                     | 931.4033 | +0.119444 | 931.4033 | 9   | G | 6  | 757.3831 |           | 757.3831            |           |
|                     | 1068.462 |           | 1068.462 | 10  | H | 5  | 700.3616 |           | 700.3616            |           |
|                     | 1167.531 | -0.039437 | 1167.531 | 11  | V | 4  | 563.3027 | +0.146972 | 563.3027            |           |
|                     | 1282.558 | -0.25742  | 1282.558 | 12  | D | 3  | 464.2343 |           | 464.2343            |           |
|                     | 1419.617 |           | 1419.617 | 13  | H | 2  | 349.2074 | +0.005756 | 349.2074            |           |
|                     | 1476.638 | -0.357571 | 1476.638 | 14  | G | 1  | 212.1485 |           | 212.1485            |           |
|                     |          |           |          | 15  | K | 0  | 155.127  |           | 155.127             |           |

#### general information

|                       |           |
|-----------------------|-----------|
| Annotation:           | 12 of 15  |
| AminoAcids Coverag    | 80 %      |
| Intensity Coverage:   | 45 %      |
| Protein Localisation: | 11 ... 25 |

Source: 201 20530\_VR\_Bsu\_TripleSILAC\_pWTPPrkCPrpC\_F03  
 Scannumber: 10006  
 Protein: BSU03490; comL; srfA2; srfAB  
 Peptide Score: 121.45  
 Method: ITMS; CID; 3

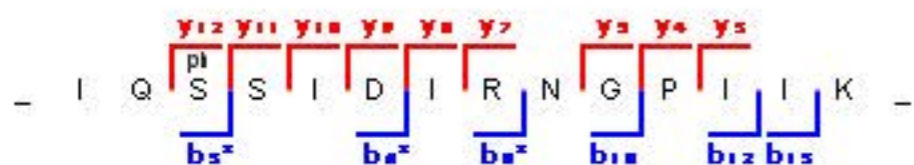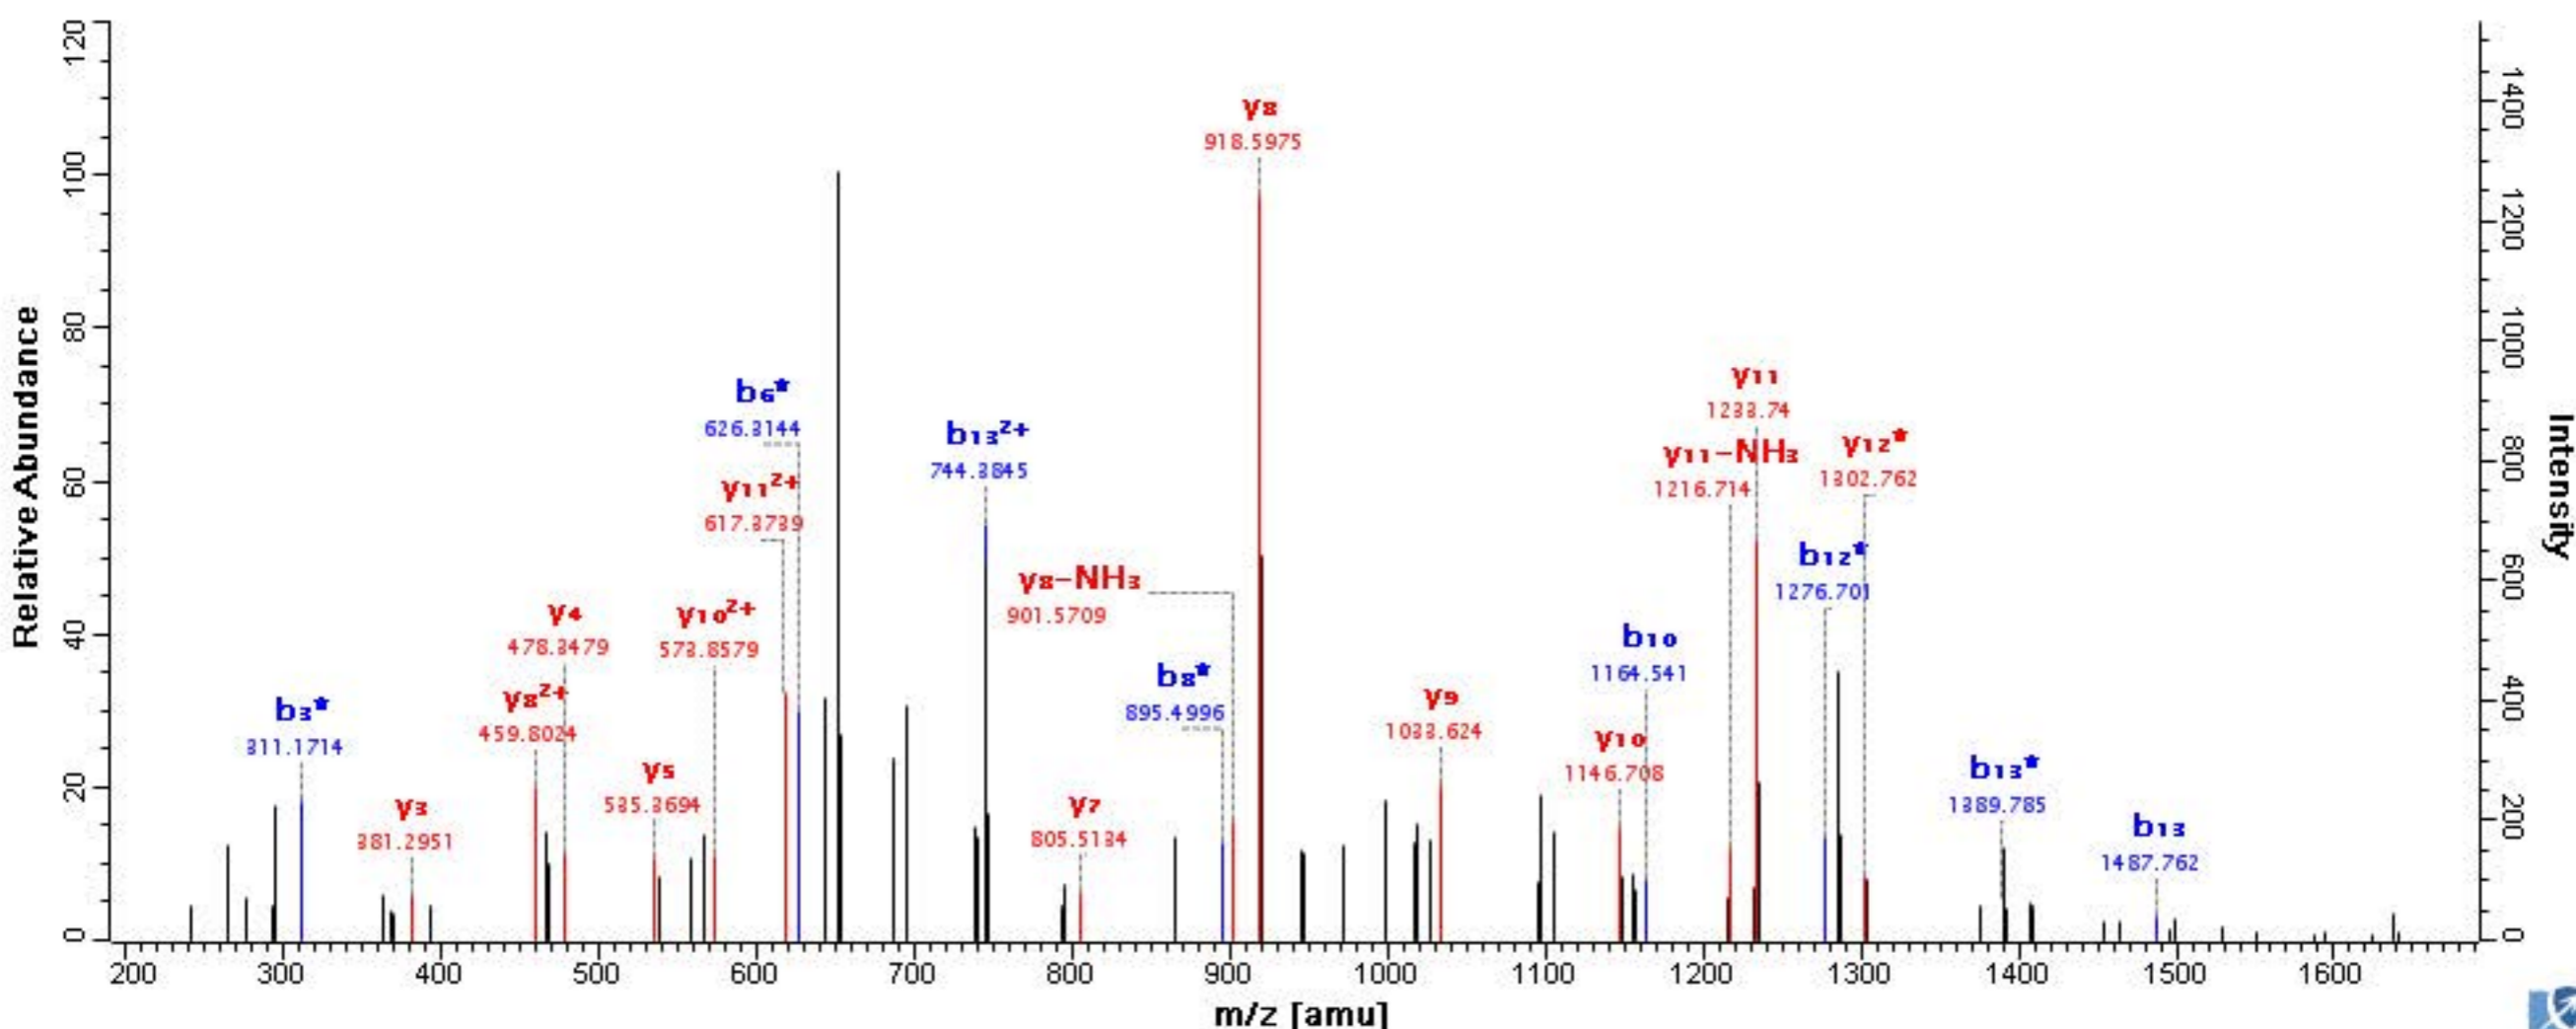

#### precursor information

|                   |                     |
|-------------------|---------------------|
| Mass:             | 1632.86008          |
| m/z:              | System.Collections. |
| Charge:           | System.Collections. |
| Retentiontime:    | System.Collections. |
| Score:            | 121.4488            |
| Mass Error [ppm]: | 0.037494            |
| PEP:              | 2.1968E-10          |
| Precursor Type:   | MULTI               |

#### general information

|                       |               |
|-----------------------|---------------|
| Annotation:           | 10 of 14      |
| AminoAcids Coverage:  | 71 %          |
| Intensity Coverage:   | 36 %          |
| Protein Localisation: | 3221 ... 3234 |

| b <sup>2+</sup> ion |          | b ion     |          | seq |   |    | γ ion    |           | γ <sup>2+</sup> ion |           |
|---------------------|----------|-----------|----------|-----|---|----|----------|-----------|---------------------|-----------|
| Δ dalton            | mass     | Δ dalton  | mass     |     |   |    | Δ dalton | mass      | Δ dalton            | mass      |
|                     | 114.0913 |           | 114.0913 | 1   | I | 13 |          |           |                     |           |
|                     | 242.1499 |           | 242.1499 | 2   | Q | 12 | 1528.797 |           | 1528.797            |           |
|                     | 409.1483 |           | 409.1483 | 3   | S | 11 | 1400.739 |           | 1400.739            |           |
|                     | 496.1803 |           | 496.1803 | 4   | S | 10 | 1233.74  | +0.005353 | 617.3739            | +0.045547 |
|                     | 609.2644 |           | 609.2644 | 5   | I | 9  | 1146.708 | -0.063326 | 573.8579            | -0.214684 |
|                     | 724.2913 |           | 724.2913 | 6   | D | 8  | 1033.624 | +0.13524  | 1033.624            |           |
|                     | 837.3754 |           | 837.3754 | 7   | I | 7  | 918.5975 | -0.007556 | 459.8024            | -0.163086 |
|                     | 993.4765 |           | 993.4765 | 8   | R | 6  | 805.5134 | +0.138092 | 805.5134            |           |
|                     | 1107.519 |           | 1107.519 | 9   | N | 5  | 649.4123 |           | 649.4123            |           |
|                     | 1164.541 | -0.036484 | 1164.541 | 10  | G | 4  | 535.3694 | -0.054051 | 535.3694            |           |
|                     | 1261.594 |           | 1261.594 | 11  | P | 3  | 478.3479 | +0.207464 | 478.3479            |           |
|                     | 1374.678 |           | 1374.678 | 12  | I | 2  | 381.2951 | +0.007909 | 381.2951            |           |
| +0.443907           | 744.3845 | +0.419016 | 1487.762 | 13  | I | 1  | 268.2111 |           | 268.2111            |           |
|                     |          |           |          | 14  | K | 0  | 155.127  |           | 155.127             |           |

Source: 201 20530\_VR\_Bsu\_TripleSILAC\_pWTPPrkCPrpC\_FD3  
 Scannumber: 10010  
 Protein: BSU33930; pgk  
 Peptide Score: 136.63  
 Method: ITMS; CID; 3

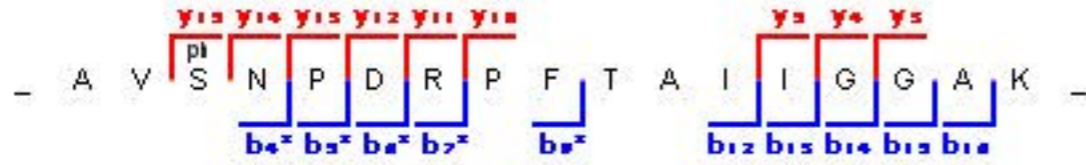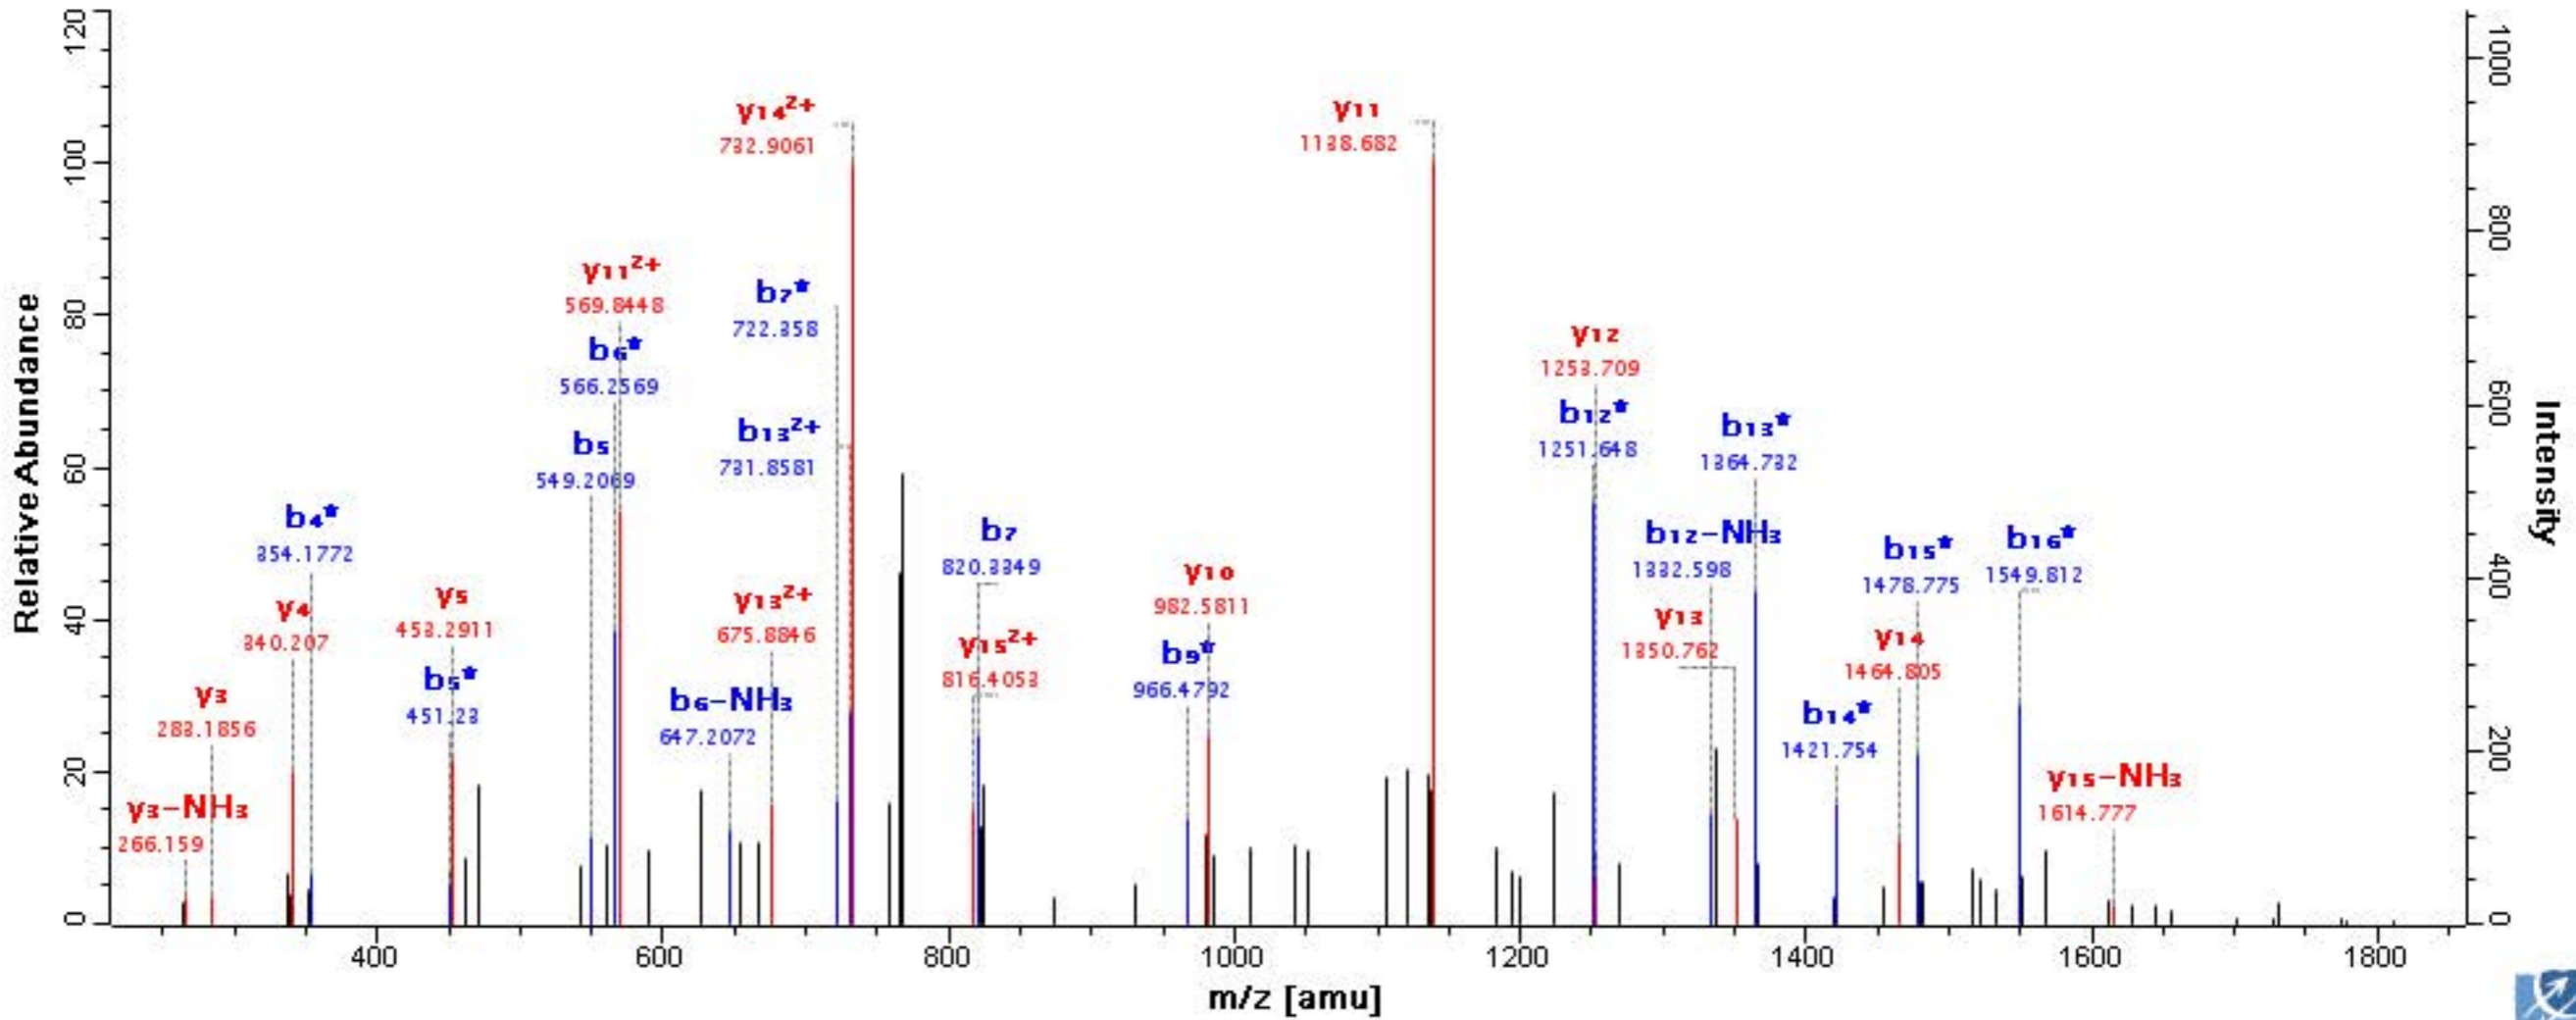

#### precursor information

|                   |                     |
|-------------------|---------------------|
| Mass:             | 1792.88712          |
| m/z:              | System.Collections. |
| Charge:           | System.Collections. |
| Retentiontime:    | System.Collections. |
| Score:            | 136.6299            |
| Mass Error [ppm]: | -0.097746           |
| PEP:              | 8.2911E-18          |
| Precursor Type:   | MULTI               |

| b <sup>2+</sup> ion |          | b ion     |          | seq |   |    | γ ion    |           | γ <sup>2+</sup> ion |           |
|---------------------|----------|-----------|----------|-----|---|----|----------|-----------|---------------------|-----------|
| Δ dalton            | mass     | Δ dalton  | mass     |     |   |    | Δ dalton | mass      | Δ dalton            | mass      |
|                     | 72.04439 |           | 72.04439 | 1   | A | 16 |          |           |                     |           |
|                     | 171.1128 |           | 171.1128 | 2   | V | 15 | 1730.872 |           | 1730.872            |           |
|                     | 338.1112 |           | 338.1112 | 3   | S | 14 | 1631.803 |           | 816.4053            | +0.373303 |
|                     | 452.1541 |           | 452.1541 | 4   | N | 13 | 1464.805 | +0.111983 | 732.9061            | +0.082871 |
|                     | 549.2069 | +0.202814 | 549.2069 | 5   | P | 12 | 1350.762 | +0.110843 | 675.8846            | +0.079554 |
|                     | 664.2338 |           | 664.2338 | 6   | D | 11 | 1253.709 | -0.044401 | 1253.709            |           |
|                     | 820.3349 | +0.180656 | 820.3349 | 7   | R | 10 | 1138.682 | +0.053587 | 569.8448            | -0.141762 |
|                     | 917.3877 |           | 917.3877 | 8   | P | 9  | 982.5811 | +0.15073  | 982.5811            |           |
|                     | 1064.456 |           | 1064.456 | 9   | F | 8  | 885.5284 |           | 885.5284            |           |
|                     | 1165.504 |           | 1165.504 | 10  | T | 7  | 738.46   |           | 738.46              |           |
|                     | 1236.541 |           | 1236.541 | 11  | A | 6  | 637.4123 |           | 637.4123            |           |
|                     | 1349.625 |           | 1349.625 | 12  | I | 5  | 566.3752 |           | 566.3752            |           |
| -0.119128           | 731.8581 |           | 1462.709 | 13  | I | 4  | 453.2911 | +0.108428 | 453.2911            |           |
|                     | 1519.73  |           | 1519.73  | 14  | G | 3  | 340.207  | +0.082568 | 340.207             |           |
|                     | 1576.752 |           | 1576.752 | 15  | G | 2  | 283.1856 | +0.15704  | 283.1856            |           |
|                     | 1647.789 |           | 1647.789 | 16  | A | 1  | 226.1641 |           | 226.1641            |           |
|                     |          |           |          | 17  | K | 0  | 155.127  |           | 155.127             |           |

#### general information

|                       |             |
|-----------------------|-------------|
| Annotation:           | 13 of 17    |
| AminoAcids Coverag    | 76 %        |
| Intensity Coverage:   | 55 %        |
| Protein Localisation: | 181 ... 197 |

Source: 201.20530\_VR\_Bsu\_TripleSILAC\_pWTPPrkCPrpC\_F03  
 Scannumber: 10244  
 Protein: BSU28440; citF; sdhA  
 Peptide Score: 120.9  
 Method: ITMS; CID; 3

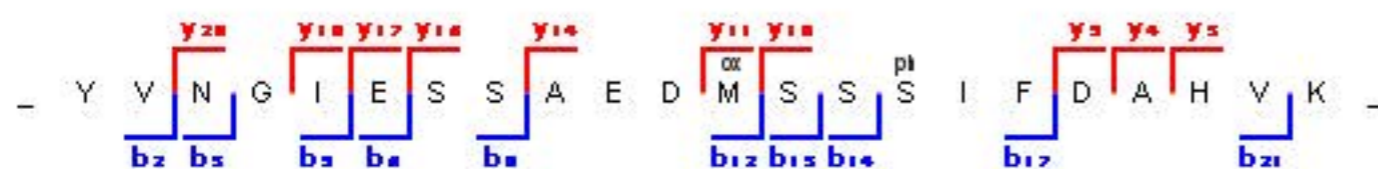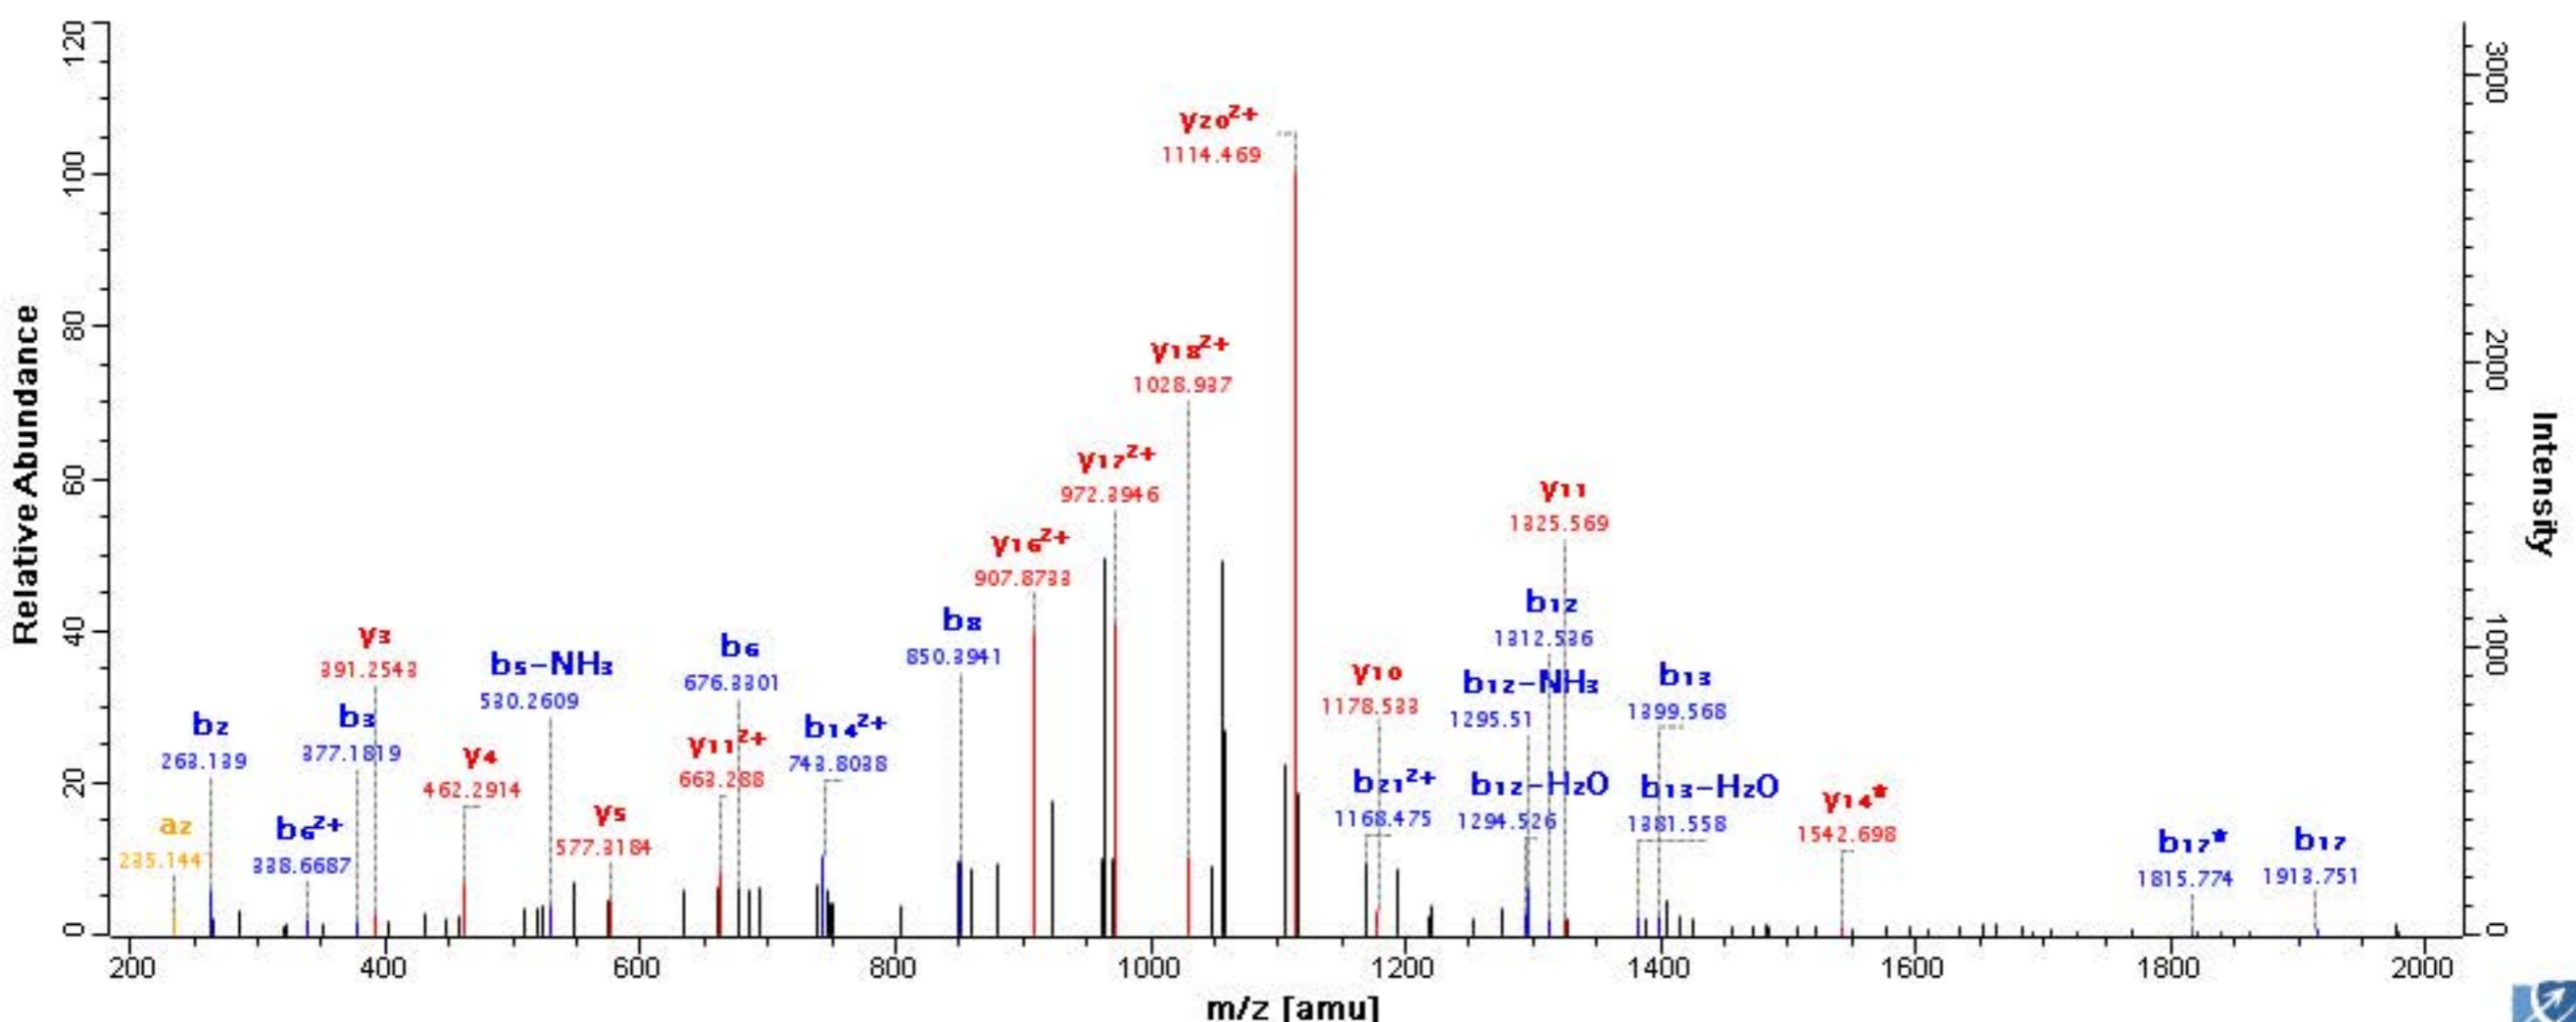

#### precursor information

|                   |                     |
|-------------------|---------------------|
| Mass:             | 2481.03987          |
| m/z:              | System.Collections. |
| Charge:           | System.Collections. |
| Retentiontime:    | System.Collections. |
| Score:            | 120.8965            |
| Mass Error [ppm]: | -0.3342             |
| PEP:              | 1.3434E-16          |
| Precursor Type:   | MULTI               |

| a ion    |         | b <sup>2+</sup> ion |         | b ion    |         |    |     | γ ion |          | γ <sup>2+</sup> ion |          |          |
|----------|---------|---------------------|---------|----------|---------|----|-----|-------|----------|---------------------|----------|----------|
| Δ dalton | mass    | Δ dalton            | mass    | Δ dalton | mass    |    | seq |       | Δ dalton | mass                | Δ dalton | mass     |
|          | 136.076 |                     | 164.071 |          | 164.071 | 1  | Y   | 21    |          |                     |          |          |
| +0.06247 | 235.144 |                     | 263.139 | +0.04897 | 263.139 | 2  | V   | 20    | 2327     |                     | 2327     |          |
|          | 349.187 |                     | 377.182 | +0.12274 | 377.182 | 3  | N   | 19    | 2227.93  |                     | 1114.47  | +0.22109 |
|          | 406.208 |                     | 434.203 |          | 434.203 | 4  | G   | 18    | 2113.89  |                     | 2113.89  |          |
|          | 519.293 |                     | 547.287 |          | 547.287 | 5  | I   | 17    | 2056.87  |                     | 1028.94  | +0.00609 |
|          | 648.335 | +0.40622            | 338.669 | +0.10151 | 676.33  | 6  | E   | 16    | 1943.78  |                     | 972.395  | +0.22311 |
|          | 735.367 |                     | 763.362 |          | 763.362 | 7  | S   | 15    | 1814.74  |                     | 907.873  | +0.04128 |
|          | 822.399 |                     | 850.394 | +0.2653  | 850.394 | 8  | S   | 14    | 1727.71  |                     | 1727.71  |          |
|          | 893.436 |                     | 921.431 |          | 921.431 | 9  | A   | 13    | 1640.68  |                     | 1640.68  |          |
|          | 1022.48 |                     | 1050.47 |          | 1050.47 | 10 | E   | 12    | 1569.64  |                     | 1569.64  |          |
|          | 1137.51 |                     | 1165.5  |          | 1165.5  | 11 | D   | 11    | 1440.6   |                     | 1440.6   |          |
|          | 1284.54 |                     | 1312.54 | +0.14571 | 1312.54 | 12 | M   | 10    | 1325.57  | +0.09807            | 663.288  | +0.08843 |
|          | 1371.57 |                     | 1399.57 | +0.04752 | 1399.57 | 13 | S   | 9     | 1178.53  | -0.4727             | 1178.53  |          |
|          | 1458.61 | -0.2217             | 743.804 |          | 1486.6  | 14 | S   | 8     | 1091.5   |                     | 1091.5   |          |
|          | 1625.6  |                     | 1653.6  |          | 1653.6  | 15 | S   | 7     | 1004.47  |                     | 1004.47  |          |
|          | 1738.69 |                     | 1766.68 |          | 1766.68 | 16 | I   | 6     | 837.471  |                     | 837.471  |          |
|          | 1885.76 |                     | 1913.75 | +0.35819 | 1913.75 | 17 | F   | 5     | 724.387  |                     | 724.387  |          |
|          | 2000.78 |                     | 2028.78 |          | 2028.78 | 18 | D   | 4     | 577.318  | +0.23563            | 577.318  |          |
|          | 2071.82 |                     | 2099.82 |          | 2099.82 | 19 | A   | 3     | 462.291  | +0.34552            | 462.291  |          |
|          | 2208.88 |                     | 2236.87 |          | 2236.87 | 20 | H   | 2     | 391.254  | +0.20166            | 391.254  |          |
|          | 2307.95 | +0.24804            | 1168.47 |          | 2335.94 | 21 | V   | 1     | 254.195  |                     | 254.195  |          |
|          |         |                     |         |          |         | 22 | K   | 0     | 155.127  |                     | 155.127  |          |

#### general information

|                       |             |
|-----------------------|-------------|
| Annotation:           | 15 of 22    |
| AminoAcids Coverage:  | 68 %        |
| Intensity Coverage:   | 40 %        |
| Protein Localisation: | 409 ... 430 |



Source: 20120530\_VR\_Bsu\_TripleSILAC\_pWTPPrkCPrpC\_F03  
 Scannumber: 10499  
 Protein: BSU32250; thrC  
 Peptide Score: 152.94  
 Method: ITMS; CID; 3

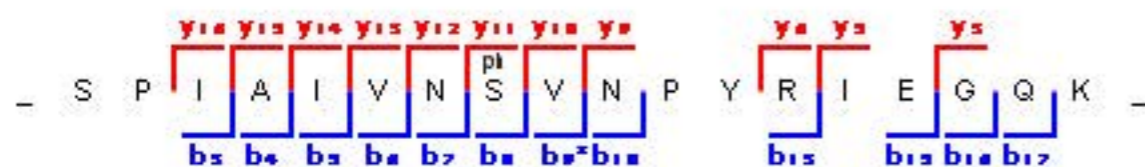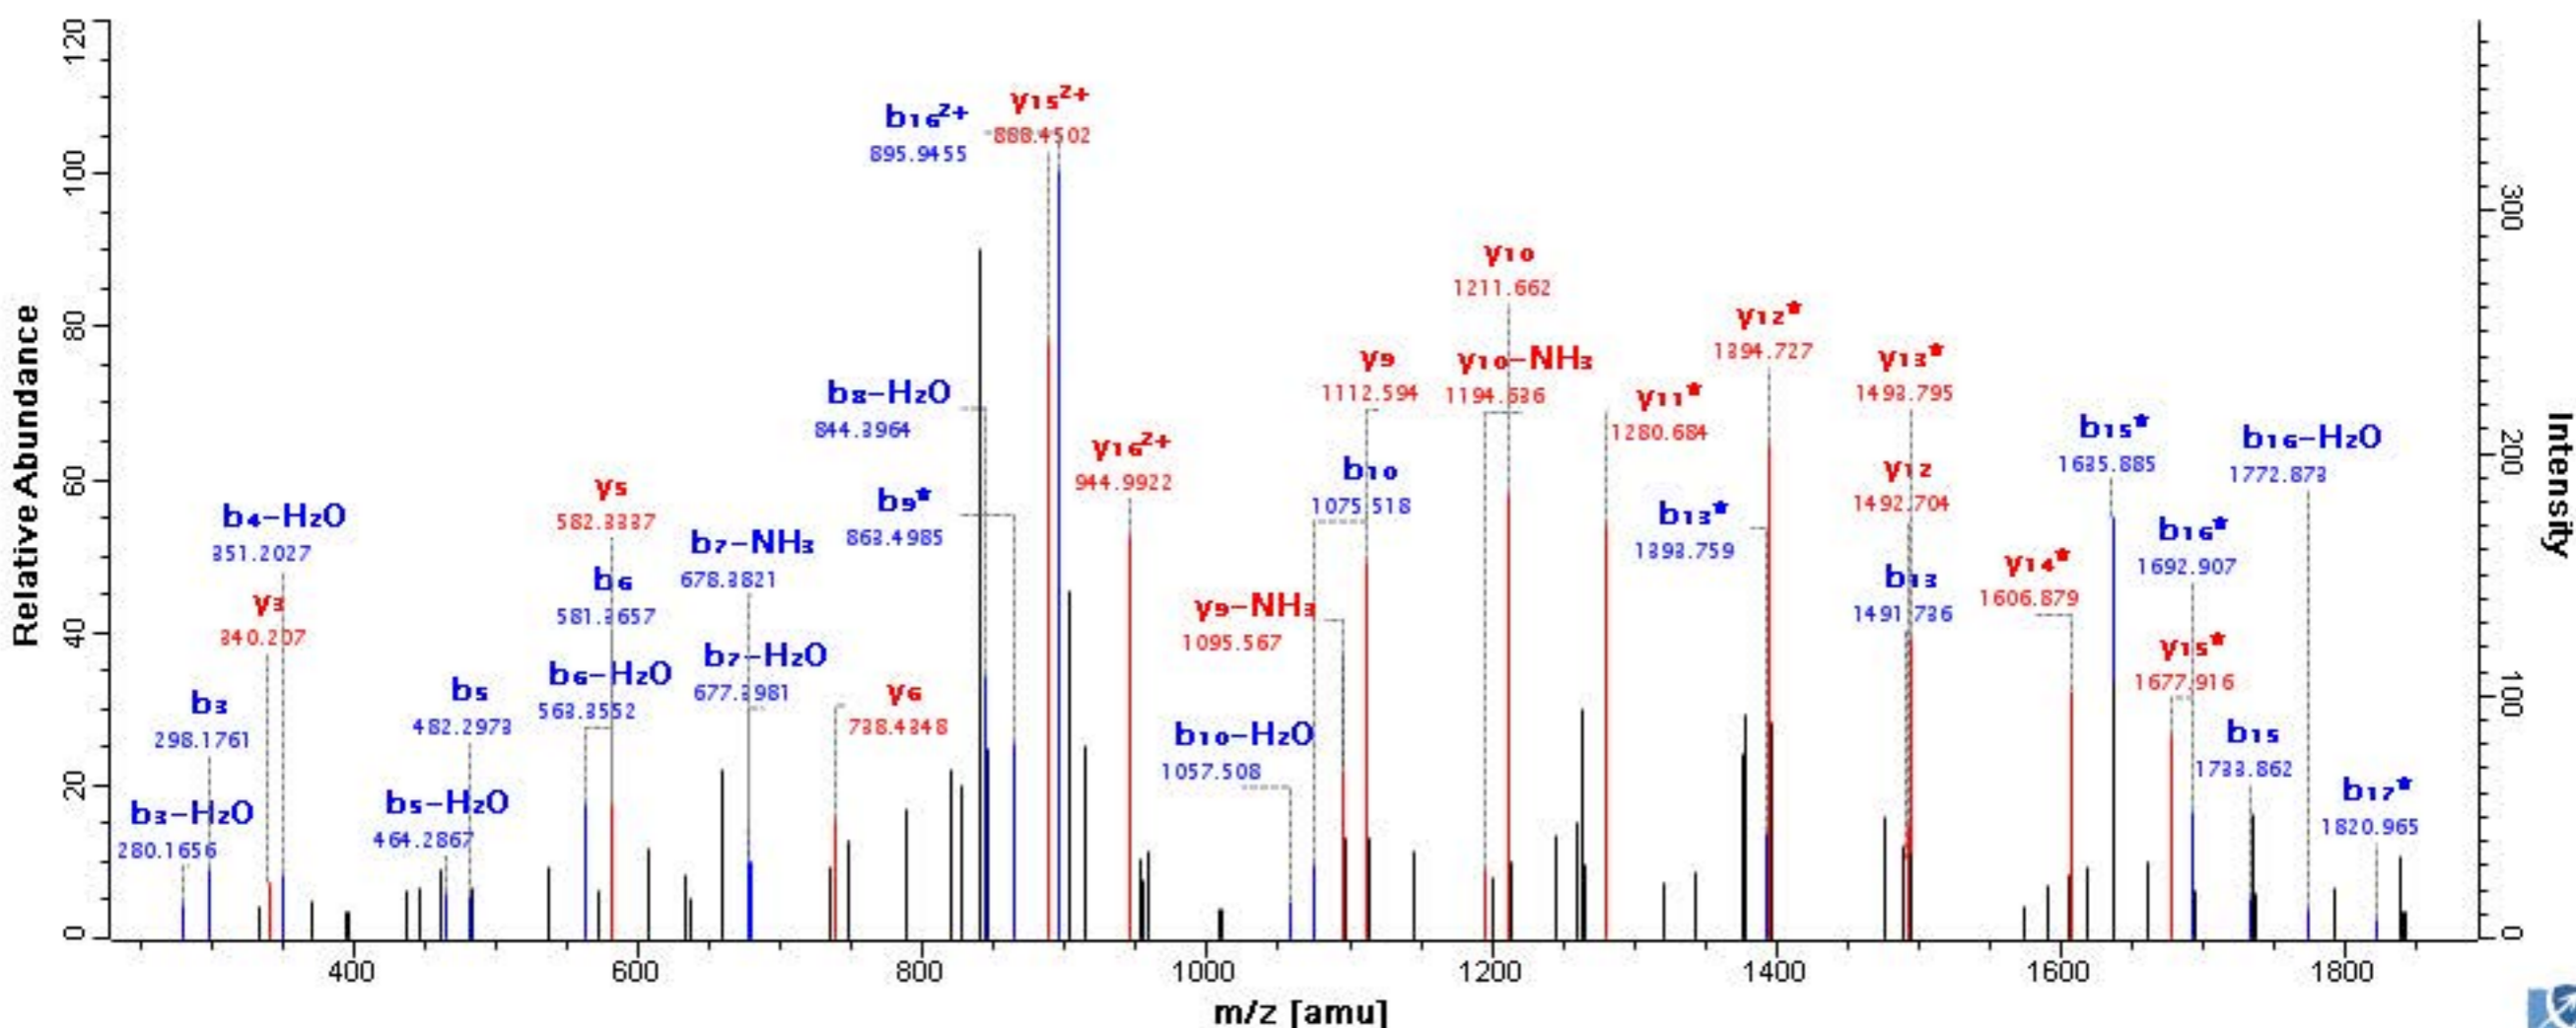

#### precursor information

|                   |                     |
|-------------------|---------------------|
| Mass:             | 2064.04042          |
| m/z:              | System.Collections. |
| Charge:           | System.Collections. |
| Retentiontime:    | System.Collections. |
| Score:            | 152.9385            |
| Mass Error [ppm]: | -0.043228           |
| PEP:              | 1.7474E-27          |
| Precursor Type:   | MULTI               |

#### general information

|                       |             |
|-----------------------|-------------|
| Annotation:           | 13 of 18    |
| AminoAcids Coverag    | 72 %        |
| Intensity Coverage:   | 52 %        |
| Protein Localisation: | 146 ... 163 |

| b <sup>2+</sup> ion |          | b ion     |          | seq |   |    | y ion    |           | y <sup>2+</sup> ion |           |
|---------------------|----------|-----------|----------|-----|---|----|----------|-----------|---------------------|-----------|
| Δ dalton            | mass     | Δ dalton  | mass     |     |   |    | Δ dalton | mass      | Δ dalton            | mass      |
|                     | 88.0393  |           | 88.0393  | 1   | S | 17 |          |           |                     |           |
|                     | 185.0921 |           | 185.0921 | 2   | P | 16 | 1986.03  |           | 1986.03             |           |
|                     | 298.1761 | +0.175827 | 298.1761 | 3   | I | 15 | 1888.977 |           | 944.9922            | +0.013017 |
|                     | 369.2132 |           | 369.2132 | 4   | A | 14 | 1775.893 |           | 888.4502            | +0.102046 |
|                     | 482.2973 | +0.100334 | 482.2973 | 5   | I | 13 | 1704.856 |           | 1704.856            |           |
|                     | 581.3657 | -0.384889 | 581.3657 | 6   | V | 12 | 1591.772 |           | 1591.772            |           |
|                     | 695.4087 |           | 695.4087 | 7   | N | 11 | 1492.704 | +0.067586 | 1492.704            |           |
|                     | 862.407  |           | 862.407  | 8   | S | 10 | 1378.661 |           | 1378.661            |           |
|                     | 961.4754 |           | 961.4754 | 9   | V | 9  | 1211.662 | +0.007065 | 1211.662            |           |
|                     | 1075.518 | +0.145466 | 1075.518 | 10  | N | 8  | 1112.594 | +0.061807 | 1112.594            |           |
|                     | 1172.571 |           | 1172.571 | 11  | P | 7  | 998.5509 |           | 998.5509            |           |
|                     | 1335.634 |           | 1335.634 | 12  | Y | 6  | 901.4981 |           | 901.4981            |           |
|                     | 1491.736 | +0.212565 | 1491.736 | 13  | R | 5  | 738.4348 | -0.150511 | 738.4348            |           |
|                     | 1604.82  |           | 1604.82  | 14  | I | 4  | 582.3337 | -0.24398  | 582.3337            |           |
|                     | 1733.862 | -0.319366 | 1733.862 | 15  | E | 3  | 469.2496 |           | 469.2496            |           |
| +0.154743           | 895.9455 |           | 1790.884 | 16  | G | 2  | 340.207  | +0.174029 | 340.207             |           |
|                     | 1918.942 |           | 1918.942 | 17  | Q | 1  | 283.1856 |           | 283.1856            |           |
|                     |          |           |          | 18  | K | 0  | 155.127  |           | 155.127             |           |

Source: 20120530\_VR\_Bsu\_TripleSILAC\_pWTPPrkCPrpC\_FD3  
 Scannumber: 10820  
 Protein: BSU13180; metC; metE  
 Peptide Score: 116.35  
 Method: ITMS; CID; 3

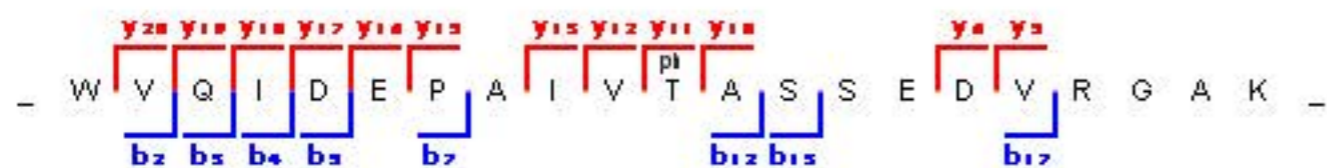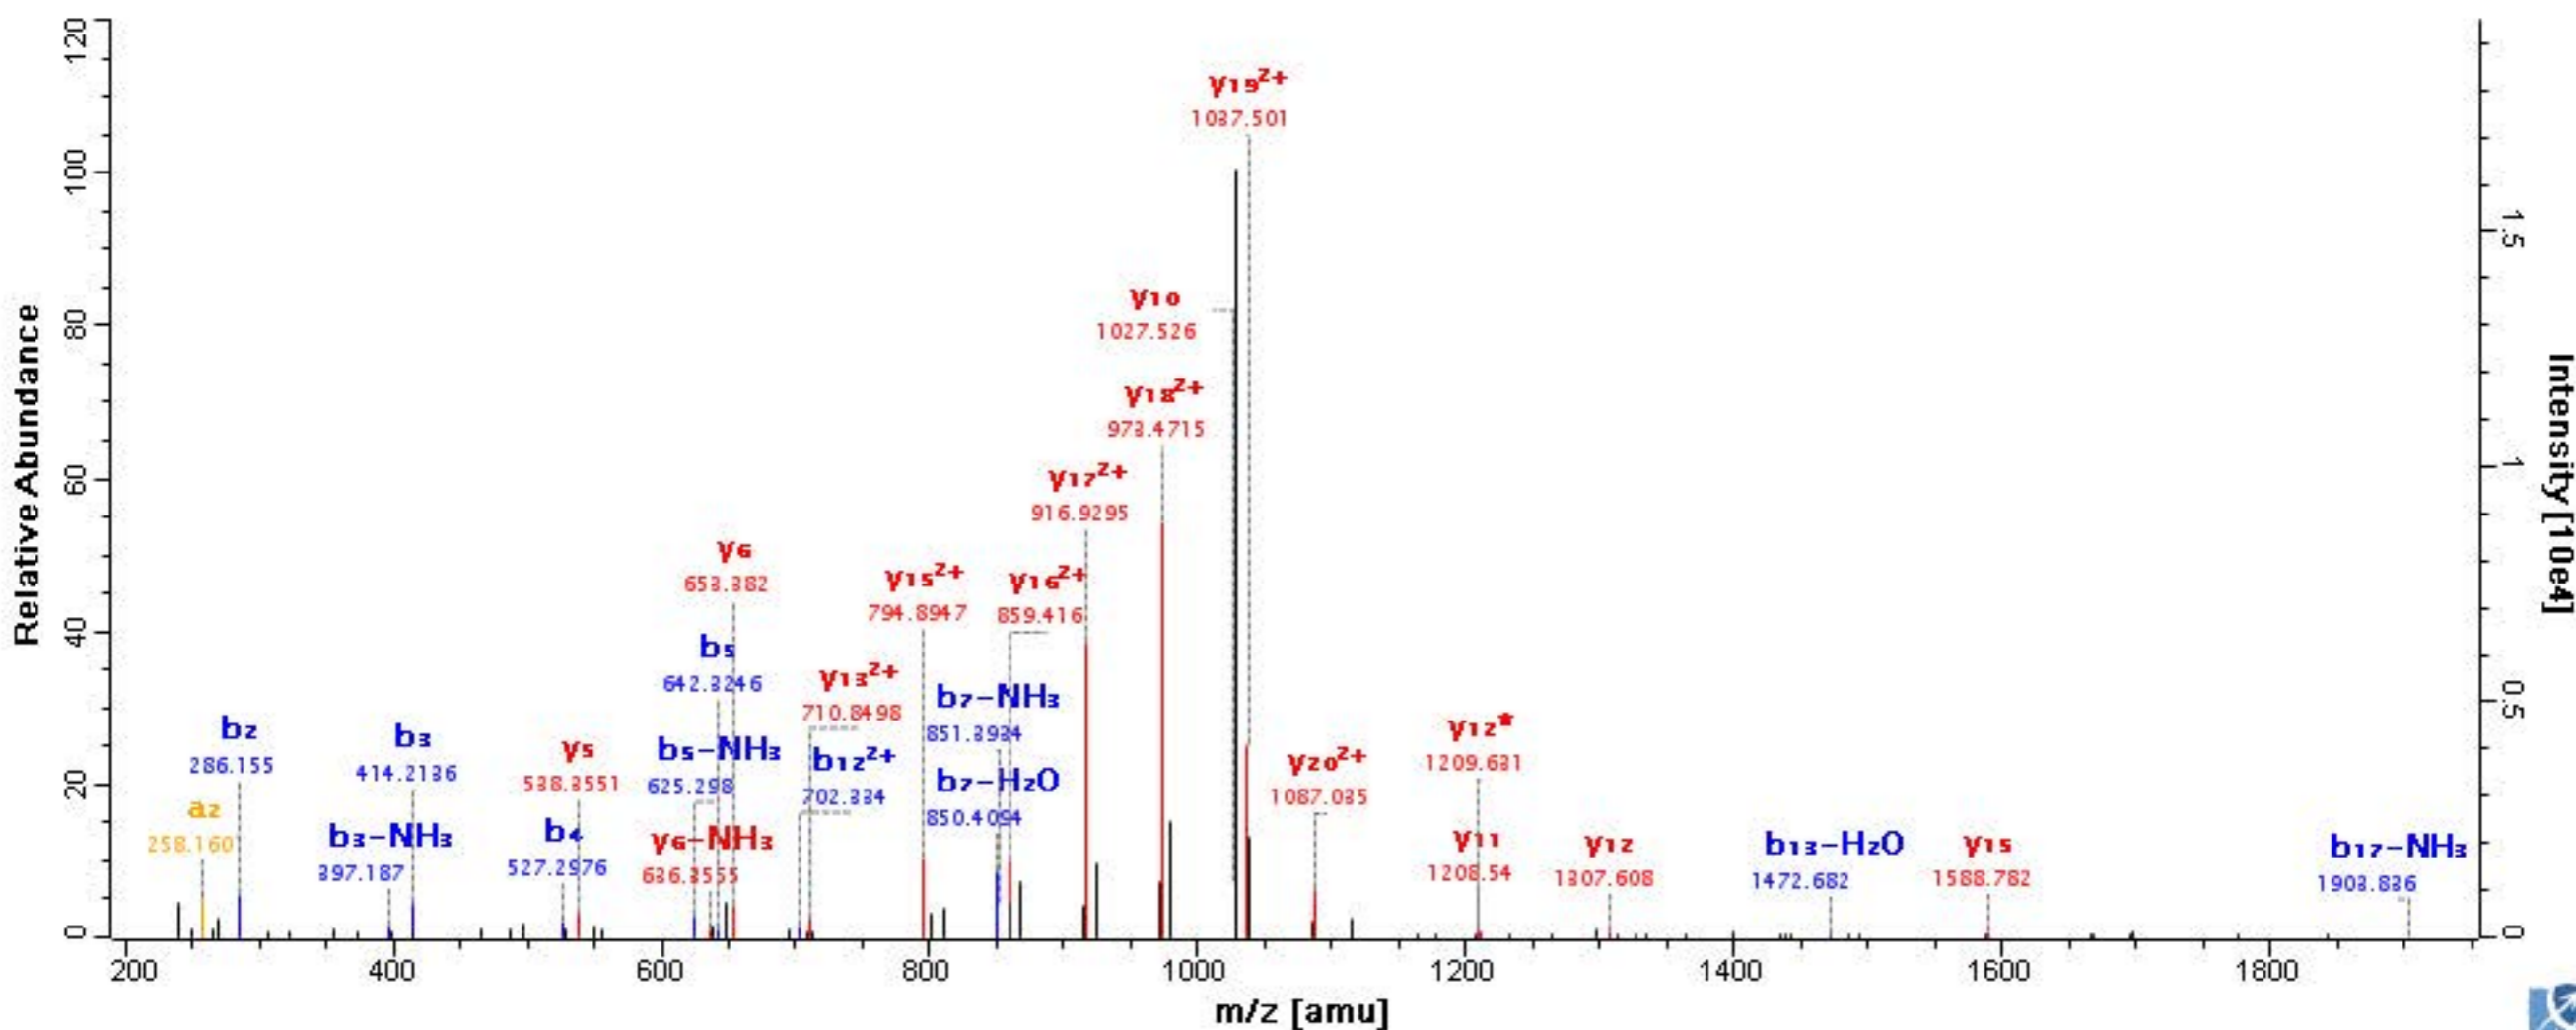

#### precursor information

|                   |                     |
|-------------------|---------------------|
| Mass:             | 2350.1203           |
| m/z:              | System.Collections. |
| Charge:           | System.Collections. |
| Retentiontime:    | System.Collections. |
| Score:            | 116.3475            |
| Mass Error [ppm]: | -0.12907            |
| PEP:              | 1.5437E-16          |
| Precursor Type:   | MULTI               |

| a ion    |         | b <sup>2+</sup> ion |         | b ion    |         | seq |   | γ ion    |         | γ <sup>2+</sup> ion |                  |
|----------|---------|---------------------|---------|----------|---------|-----|---|----------|---------|---------------------|------------------|
| Δ dalton | mass    | Δ dalton            | mass    | Δ dalton | mass    |     |   | Δ dalton | mass    | Δ dalton            | mass             |
|          | 159.092 |                     | 187.087 |          | 187.087 | 1   | W | 20       |         |                     |                  |
| -0.0362  | 258.16  |                     | 286.155 | +0.04397 | 286.155 | 2   | V | 19       | 2173.06 |                     | 1087.04 +0.08729 |
|          | 386.219 |                     | 414.214 | -0.0131  | 414.214 | 3   | Q | 18       | 2073.99 |                     | 1037.5 -0.1908   |
|          | 499.303 |                     | 527.298 | +0.0229  | 527.298 | 4   | I | 17       | 1945.94 |                     | 973.472 +0.18326 |
|          | 614.33  |                     | 642.325 | +0.1012  | 642.325 | 5   | D | 16       | 1832.85 |                     | 916.929 +0.25899 |
|          | 743.372 |                     | 771.367 |          | 771.367 | 6   | E | 15       | 1717.82 |                     | 859.416 -0.0519  |
|          | 840.425 |                     | 868.42  |          | 868.42  | 7   | P | 14       | 1588.78 | +0.14885            | 794.895 +0.27007 |
|          | 911.462 |                     | 939.457 |          | 939.457 | 8   | A | 13       | 1491.73 |                     | 1491.73          |
|          | 1024.55 |                     | 1052.54 |          | 1052.54 | 9   | I | 12       | 1420.69 |                     | 710.85 +0.3053   |
|          | 1123.61 |                     | 1151.61 |          | 1151.61 | 10  | V | 11       | 1307.61 | +0.10295            | 1307.61          |
|          | 1304.63 |                     | 1332.62 |          | 1332.62 | 11  | T | 10       | 1208.54 | +0.22593            | 1208.54          |
|          | 1375.67 | -0.2759             | 702.334 |          | 1403.66 | 12  | A | 9        | 1027.53 | +0.21442            | 1027.53          |
|          | 1462.7  |                     | 1490.69 |          | 1490.69 | 13  | S | 8        | 956.489 |                     | 956.489          |
|          | 1549.73 |                     | 1577.72 |          | 1577.72 | 14  | S | 7        | 869.457 |                     | 869.457          |
|          | 1678.77 |                     | 1706.77 |          | 1706.77 | 15  | E | 6        | 782.425 |                     | 782.425          |
|          | 1793.8  |                     | 1821.79 |          | 1821.79 | 16  | D | 5        | 653.382 | +0.10214            | 653.382          |
|          | 1892.87 |                     | 1920.86 |          | 1920.86 | 17  | V | 4        | 538.355 | +0.01147            | 538.355          |
|          | 2048.97 |                     | 2076.96 |          | 2076.96 | 18  | R | 3        | 439.287 |                     | 439.287          |
|          | 2105.99 |                     | 2133.99 |          | 2133.99 | 19  | G | 2        | 283.186 |                     | 283.186          |
|          | 2177.03 |                     | 2205.02 |          | 2205.02 | 20  | A | 1        | 226.164 |                     | 226.164          |
|          |         |                     |         |          |         | 21  | K | 0        | 155.127 |                     | 155.127          |

#### general information

|                       |             |
|-----------------------|-------------|
| Annotation:           | 13 of 21    |
| AminoAcids Coverage:  | 62 %        |
| Intensity Coverage:   | 45 %        |
| Protein Localisation: | 200 ... 220 |

Source: 20120530\_VR\_Bsu\_TripleSILAC\_pWTPPrkCPrpC\_F03  
 Scannumber: 11019  
 Protein: BSU22950; ypdA  
 Peptide Score: 76.71  
 Method: ITMS; CID; 3

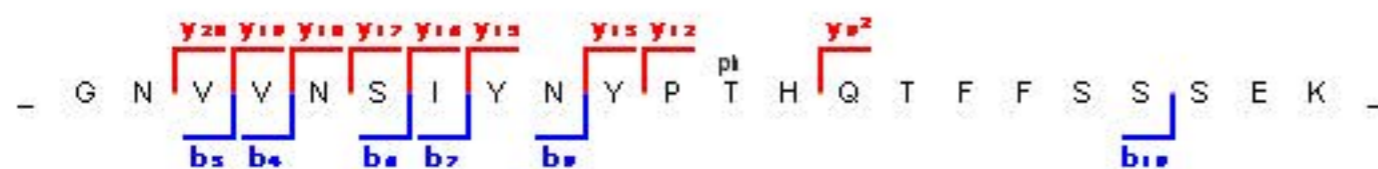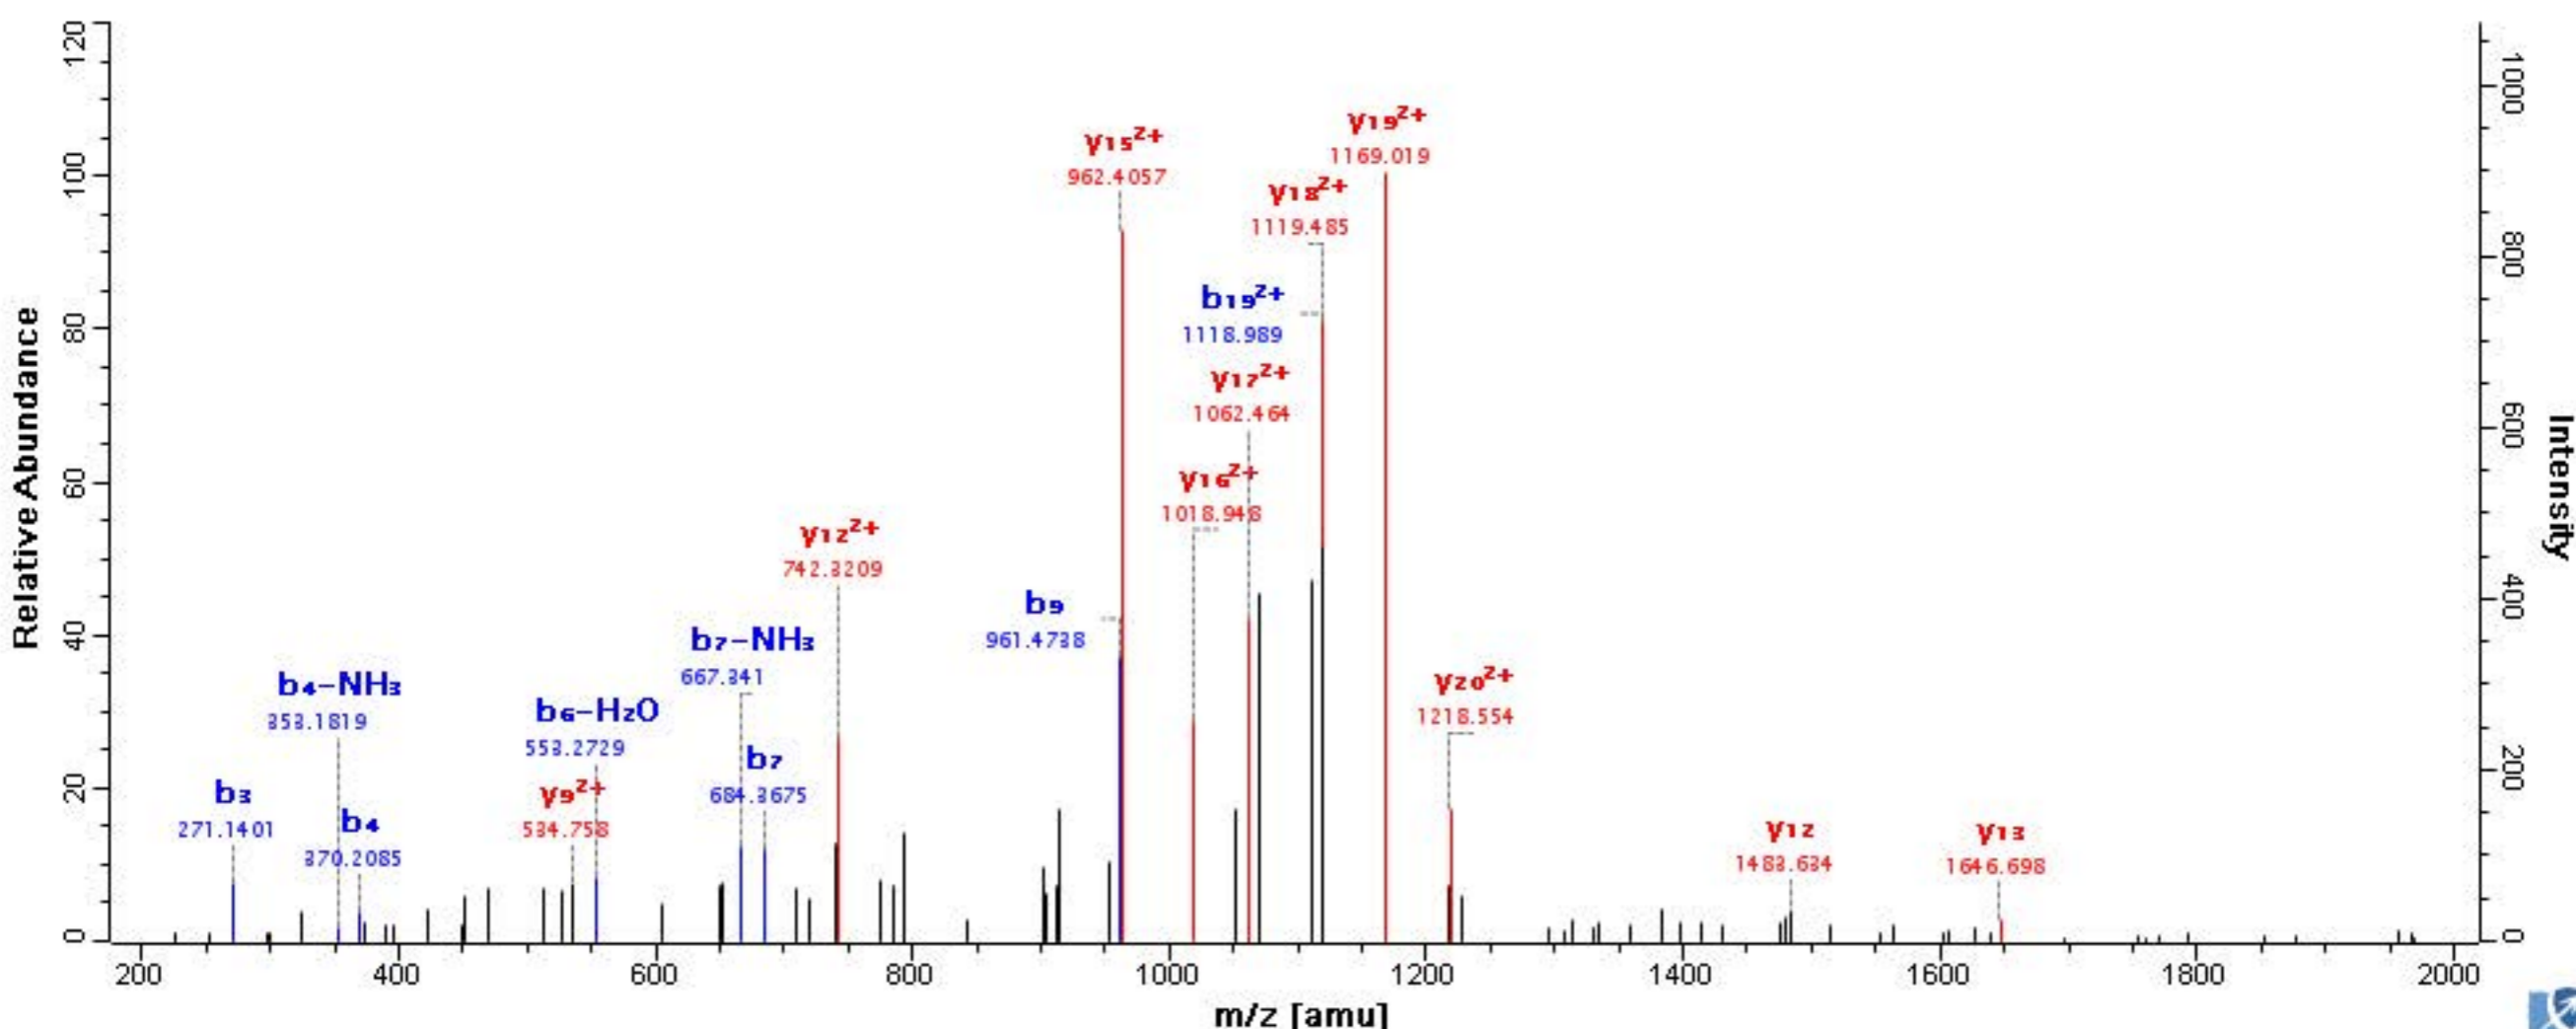

#### precursor information

|                   |                     |
|-------------------|---------------------|
| Mass:             | 2598.14223          |
| m/z:              | System.Collections. |
| Charge:           | System.Collections. |
| Retentiontime:    | System.Collections. |
| Score:            | 76.71334            |
| Mass Error [ppm]: | -0.21944            |
| PEP:              | 0.00019749          |
| Precursor Type:   | MULTI               |

| b <sup>2+</sup> ion |          | b ion     |          |     | γ ion |          | γ <sup>2+</sup> ion |           |           |           |
|---------------------|----------|-----------|----------|-----|-------|----------|---------------------|-----------|-----------|-----------|
| Δ dalton            | mass     | Δ dalton  | mass     | seq |       | Δ dalton | mass                | Δ dalton  | mass      |           |
|                     | 58.02874 |           | 58.02874 | 1   | G     | 21       |                     |           |           |           |
|                     | 172.0717 |           | 172.0717 | 2   | N     | 20       | 2550.143            | 2550.143  |           |           |
|                     | 271.1401 | -0.150061 | 271.1401 | 3   | V     | 19       | 2436.1              | 1218.554  | +0.244272 |           |
|                     | 370.2085 | +0.072022 | 370.2085 | 4   | V     | 18       | 2337.031            | 1169.019  | +0.320716 |           |
|                     | 484.2514 |           | 484.2514 | 5   | N     | 17       | 2237.963            | 1119.485  | -0.029233 |           |
|                     | 571.2835 |           | 571.2835 | 6   | S     | 16       | 2123.92             | 1062.464  | +0.087934 |           |
|                     | 684.3675 | -0.070213 | 684.3675 | 7   | I     | 15       | 2036.888            | 1018.948  | +0.240606 |           |
|                     | 847.4308 |           | 847.4308 | 8   | Y     | 14       | 1923.804            | 962.4057  | +0.222518 |           |
|                     | 961.4738 | +0.037276 | 961.4738 | 9   | N     | 13       | 1760.741            | 1760.741  |           |           |
|                     | 1124.537 |           | 1124.537 | 10  | Y     | 12       | 1646.698            | +0.126074 | 1646.698  |           |
|                     | 1221.59  |           | 1221.59  | 11  | P     | 11       | 1483.634            | +0.122997 | 742.3209  | -0.047975 |
|                     | 1402.604 |           | 1402.604 | 12  | T     | 10       | 1386.582            |           | 1386.582  |           |
|                     | 1539.663 |           | 1539.663 | 13  | H     | 9        | 1205.568            |           | 1205.568  |           |
|                     | 1667.721 |           | 1667.721 | 14  | Q     | 8        | 1068.509            |           | 534.758   | +0.313207 |
|                     | 1768.769 |           | 1768.769 | 15  | T     | 7        | 940.4502            |           | 940.4502  |           |
|                     | 1915.837 |           | 1915.837 | 16  | F     | 6        | 839.4025            |           | 839.4025  |           |
|                     | 2062.906 |           | 2062.906 | 17  | F     | 5        | 692.3341            |           | 692.3341  |           |
|                     | 2149.938 |           | 2149.938 | 18  | S     | 4        | 545.2657            |           | 545.2657  |           |
| -0.459548           | 1118.989 |           | 2236.97  | 19  | S     | 3        | 458.2337            |           | 458.2337  |           |
|                     | 2324.002 |           | 2324.002 | 20  | S     | 2        | 371.2016            |           | 371.2016  |           |
|                     | 2453.045 |           | 2453.045 | 21  | E     | 1        | 284.1696            |           | 284.1696  |           |
|                     |          |           |          | 22  | K     | 0        | 155.127             |           | 155.127   |           |

#### general information

|                       |           |
|-----------------------|-----------|
| Annotation:           | 11 of 22  |
| AminoAcids Coverag    | 50 %      |
| Intensity Coverage:   | 52 %      |
| Protein Localisation: | 35 ... 56 |

Source: 201 20530\_VR\_Bsu\_TripleSILAC\_pWTPPrkCPrpC\_F03  
 Scannumber: 11248  
 Protein: BSU03490; comL; srfA2; srfAB  
 Peptide Score: 115.38  
 Method: ITMS; CID; 3

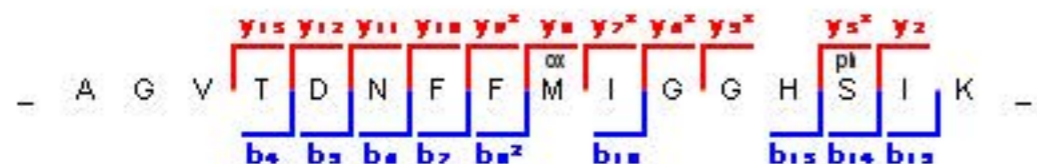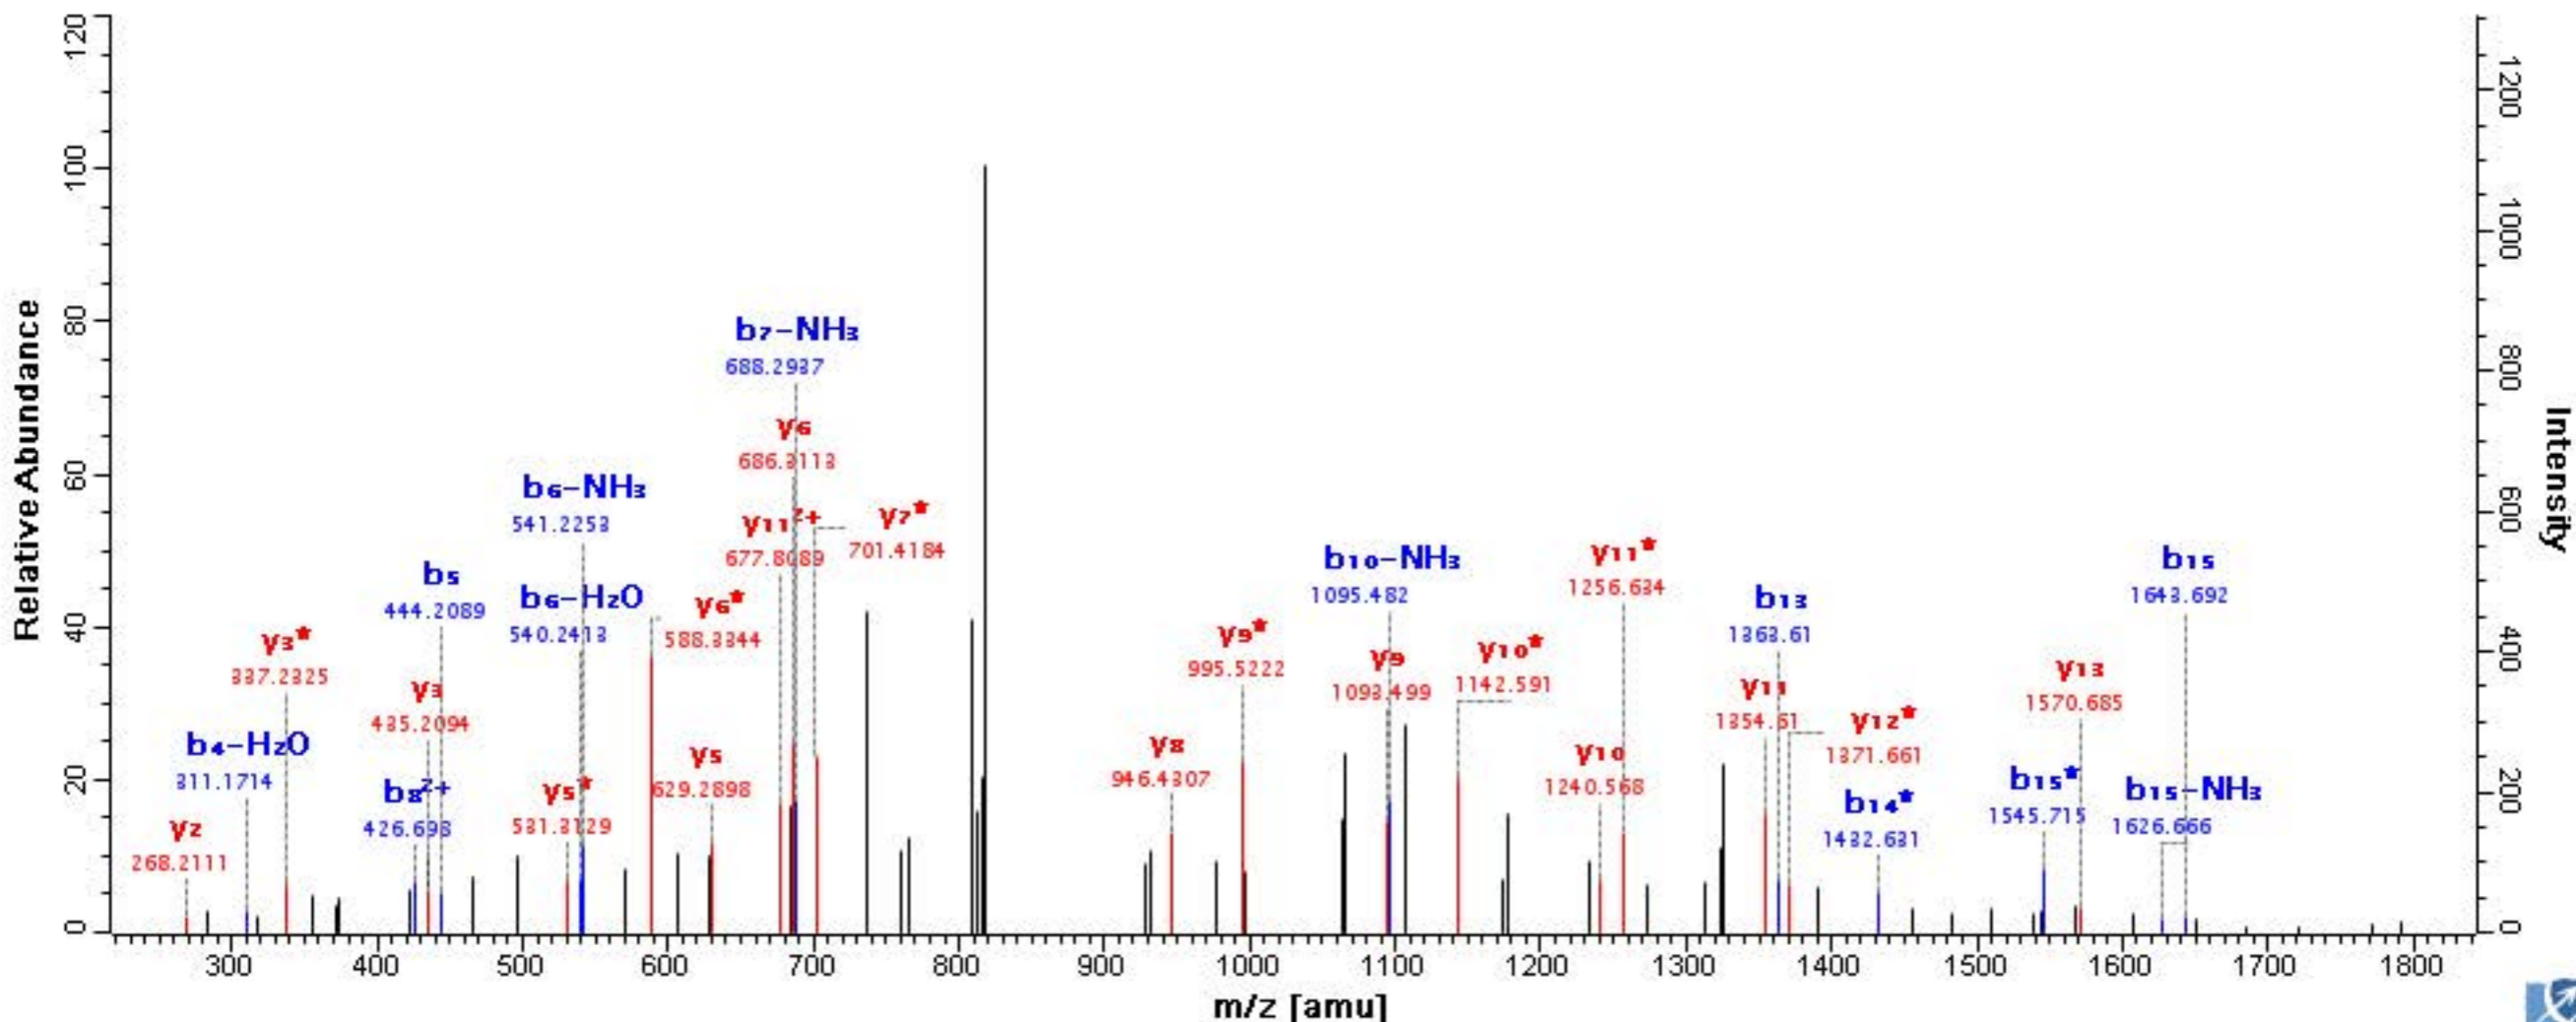

#### precursor information

|                   |                     |
|-------------------|---------------------|
| Mass:             | 1788.79098          |
| m/z:              | System.Collections. |
| Charge:           | System.Collections. |
| Retentiontime:    | System.Collections. |
| Score:            | 115.3842            |
| Mass Error [ppm]: | 0.20244             |
| PEP:              | 5.1896E-11          |
| Precursor Type:   | MULTI               |

| b <sup>2+</sup> ion |          | b ion           |          |     | y ion |                 | y <sup>2+</sup> ion |                 |          |           |
|---------------------|----------|-----------------|----------|-----|-------|-----------------|---------------------|-----------------|----------|-----------|
| $\Delta$ dalton     | mass     | $\Delta$ dalton | mass     | seq |       | $\Delta$ dalton | mass                | $\Delta$ dalton | mass     |           |
|                     | 72.04439 |                 | 72.04439 | 1   | A     | 15              |                     |                 |          |           |
|                     | 129.0659 |                 | 129.0659 | 2   | G     | 14              | 1726.775            |                 | 1726.775 |           |
|                     | 228.1343 |                 | 228.1343 | 3   | V     | 13              | 1669.754            |                 | 1669.754 |           |
|                     | 329.1819 |                 | 329.1819 | 4   | T     | 12              | 1570.685            | +0.096755       | 1570.685 |           |
|                     | 444.2089 | +0.150119       | 444.2089 | 5   | D     | 11              | 1469.637            |                 | 1469.637 |           |
|                     | 558.2518 |                 | 558.2518 | 6   | N     | 10              | 1354.61             | -0.114756       | 677.8089 | -0.333416 |
|                     | 705.3202 |                 | 705.3202 | 7   | F     | 9               | 1240.568            | -0.40032        | 1240.568 |           |
| -0.242821           | 426.698  |                 | 852.3886 | 8   | F     | 8               | 1093.499            | +0.428958       | 1093.499 |           |
|                     | 999.424  |                 | 999.424  | 9   | M     | 7               | 946.4307            | -0.076053       | 946.4307 |           |
|                     | 1112.508 |                 | 1112.508 | 10  | I     | 6               | 799.3953            |                 | 799.3953 |           |
|                     | 1169.53  |                 | 1169.53  | 11  | G     | 5               | 686.3113            | +0.052504       | 686.3113 |           |
|                     | 1226.551 |                 | 1226.551 | 12  | G     | 4               | 629.2898            | +0.130426       | 629.2898 |           |
|                     | 1363.61  | +0.183388       | 1363.61  | 13  | H     | 3               | 572.2683            |                 | 572.2683 |           |
|                     | 1530.608 |                 | 1530.608 | 14  | S     | 2               | 435.2094            | +0.141893       | 435.2094 |           |
|                     | 1643.692 | +0.202283       | 1643.692 | 15  | I     | 1               | 268.2111            | +0.012871       | 268.2111 |           |
|                     |          |                 |          | 16  | K     | 0               | 155.127             |                 | 155.127  |           |

#### general information

|                       |              |
|-----------------------|--------------|
| Annotation:           | 12 of 16     |
| AminoAcids Coverag    | 75 %         |
| Intensity Coverage:   | 34 %         |
| Protein Localisation: | 986 ... 1001 |

Source: 201 20530\_VR\_Bsu\_TripleSILAC\_pWTPPrkCPrpC\_FD3  
 Scannumber: 11320  
 Protein: aceD; BSU14610; citL; pdhD  
 Peptide Score: 64.27  
 Method: ITMS; CID; 3

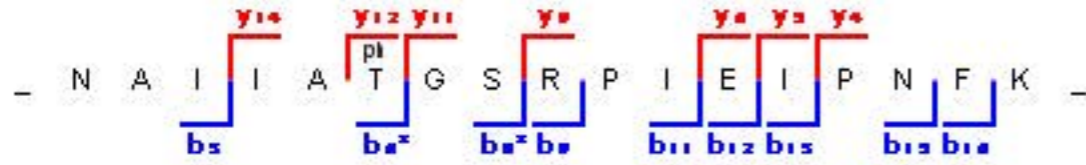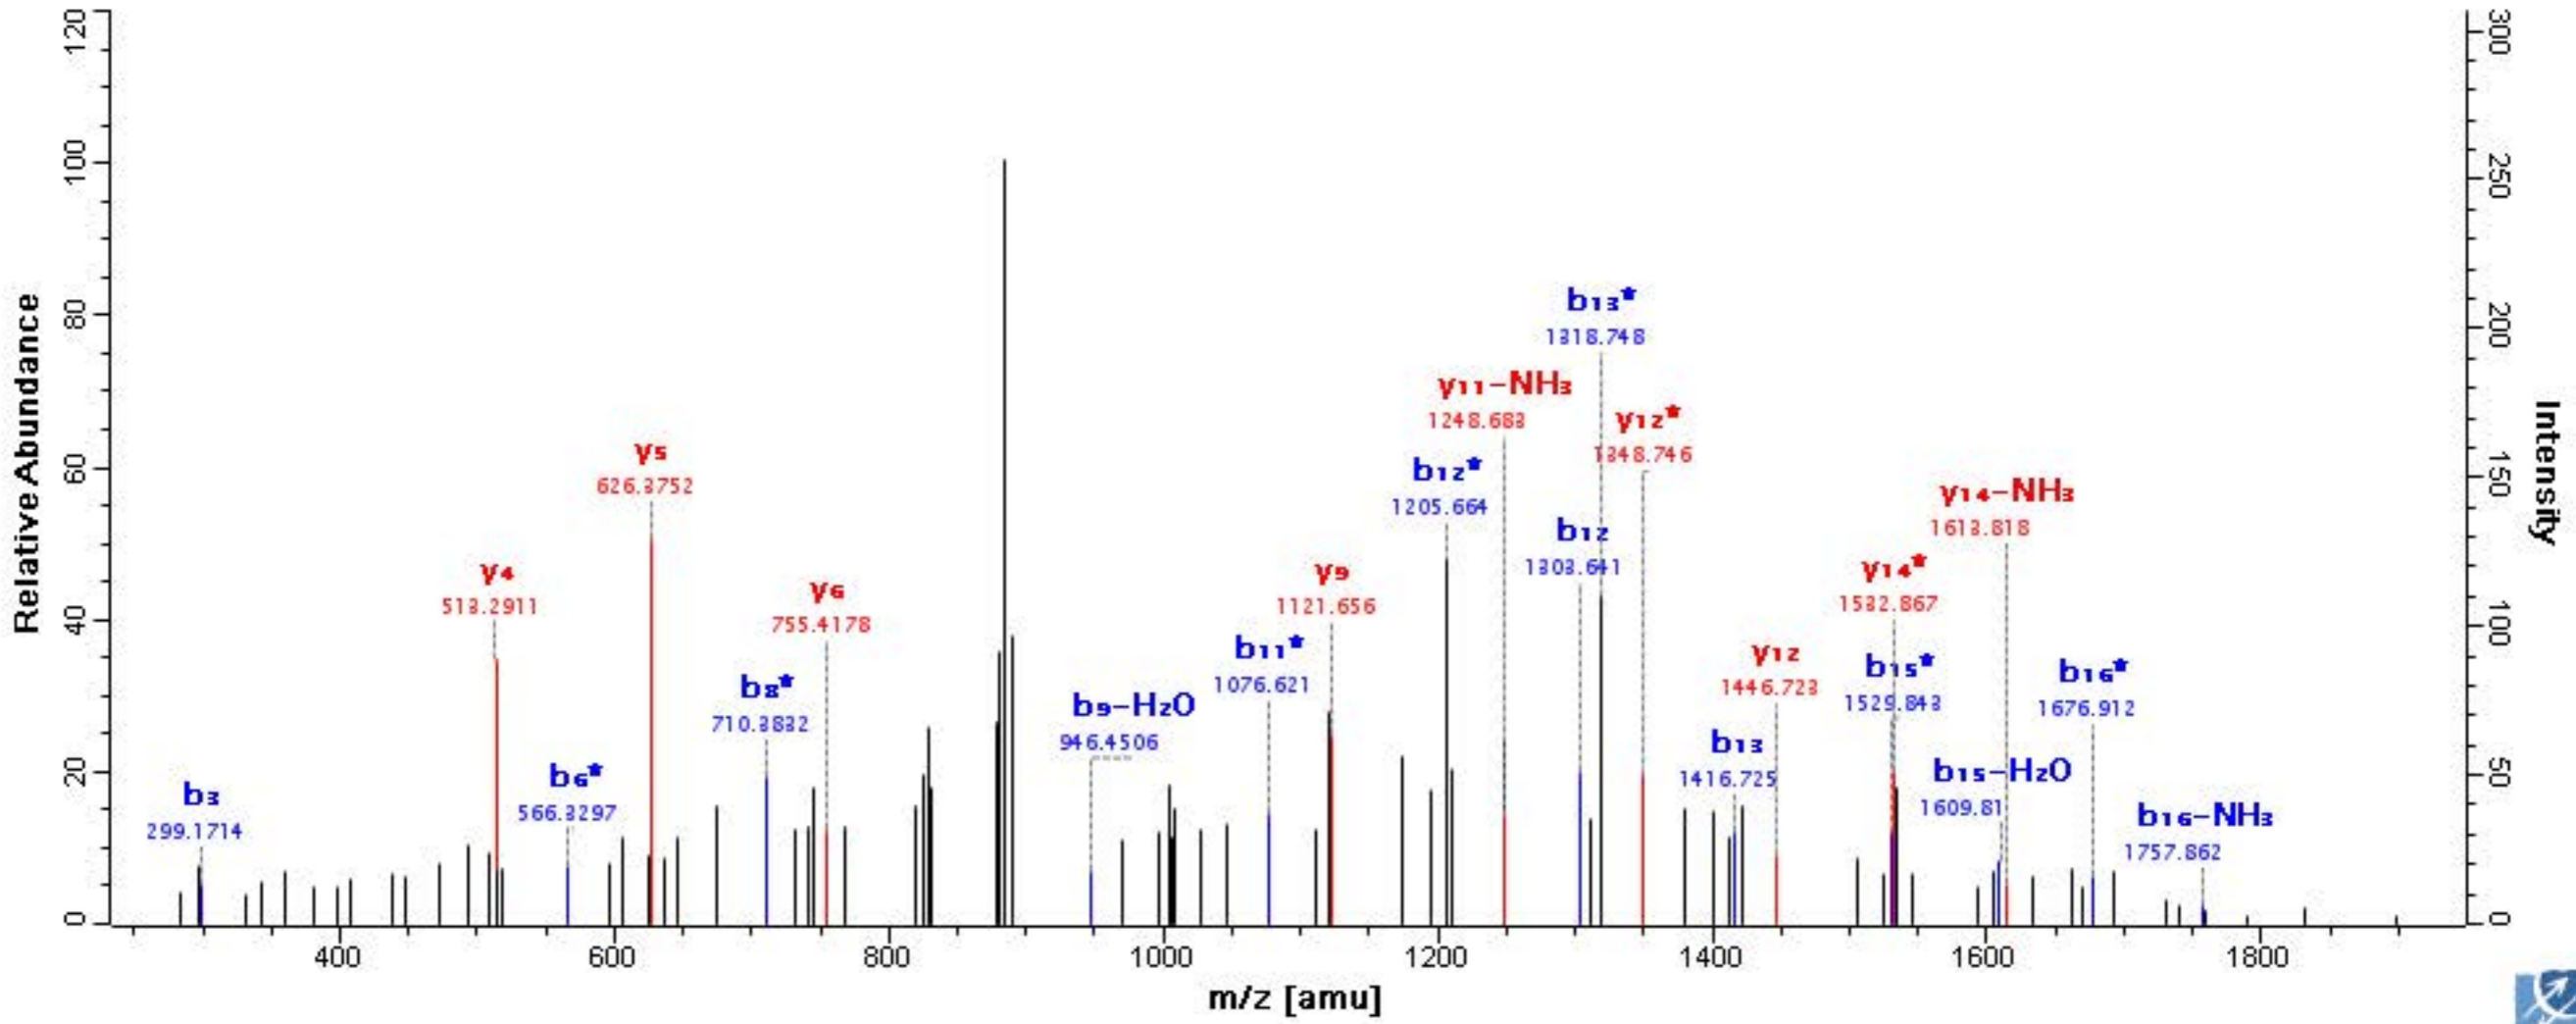

#### precursor information

|                   |                     |
|-------------------|---------------------|
| Mass:             | 1919.98635          |
| m/z:              | System.Collections. |
| Charge:           | System.Collections. |
| Retentiontime:    | System.Collections. |
| Score:            | 64.27496            |
| Mass Error [ppm]: | -0.34383            |
| PEP:              | 0.0049098           |
| Precursor Type:   | MULTI               |

#### general information

|                       |             |
|-----------------------|-------------|
| Annotation:           | 12 of 17    |
| AminoAcids Coverag    | 71 %        |
| Intensity Coverage:   | 28 %        |
| Protein Localisation: | 142 ... 158 |

| b ion      |                |    |     |    |                | y ion      |  |
|------------|----------------|----|-----|----|----------------|------------|--|
| Δ dalton   | mass           |    | seq |    | Δ dalton       | mass       |  |
|            | 115.050203914  | 1  | N   | 16 |                |            |  |
|            | 186.087317702  | 2  | A   | 15 | 1814.965560689 |            |  |
| -0.0806529 | 299.171381682  | 3  | I   | 14 | 1743.928446901 |            |  |
|            | 412.255445662  | 4  | I   | 13 | 1630.84438292  |            |  |
|            | 483.29255945   | 5  | A   | 12 | 1517.76031894  |            |  |
|            | 664.306568333  | 6  | T   | 11 | 1446.723205152 | +0.2168583 |  |
|            | 721.328032056  | 7  | G   | 10 | 1265.70919627  |            |  |
|            | 808.360060466  | 8  | S   | 9  | 1208.687732546 |            |  |
|            | 964.461171494  | 9  | R   | 8  | 1121.655704136 | +0.0092129 |  |
|            | 1061.513935346 | 10 | P   | 7  | 965.554593108  |            |  |
|            | 1174.597999327 | 11 | I   | 6  | 868.501829256  |            |  |
| -0.009611  | 1303.640592423 | 12 | E   | 5  | 755.417765276  | -0.0428263 |  |
| -0.1472638 | 1416.724656403 | 13 | I   | 4  | 626.37517218   | +0.0015368 |  |
|            | 1513.777420255 | 14 | P   | 3  | 513.291108199  | +0.113738  |  |
|            | 1627.820347703 | 15 | N   | 2  | 416.238344347  |            |  |
|            | 1774.888761619 | 16 | F   | 1  | 302.1954169    |            |  |
|            |                | 17 | K   | 0  | 155.127002984  |            |  |

Source: 20120530\_VR\_Bsu\_TripleSILAC\_pWTPPrkPrpC\_F03  
 Scannumber: 12335  
 Protein: BSU08320; yfIM  
 Peptide Score: 71.78  
 Method: ITMS; CID; 3

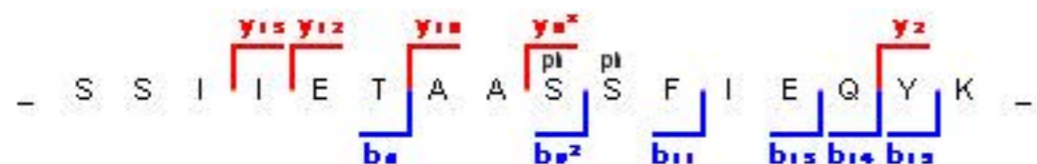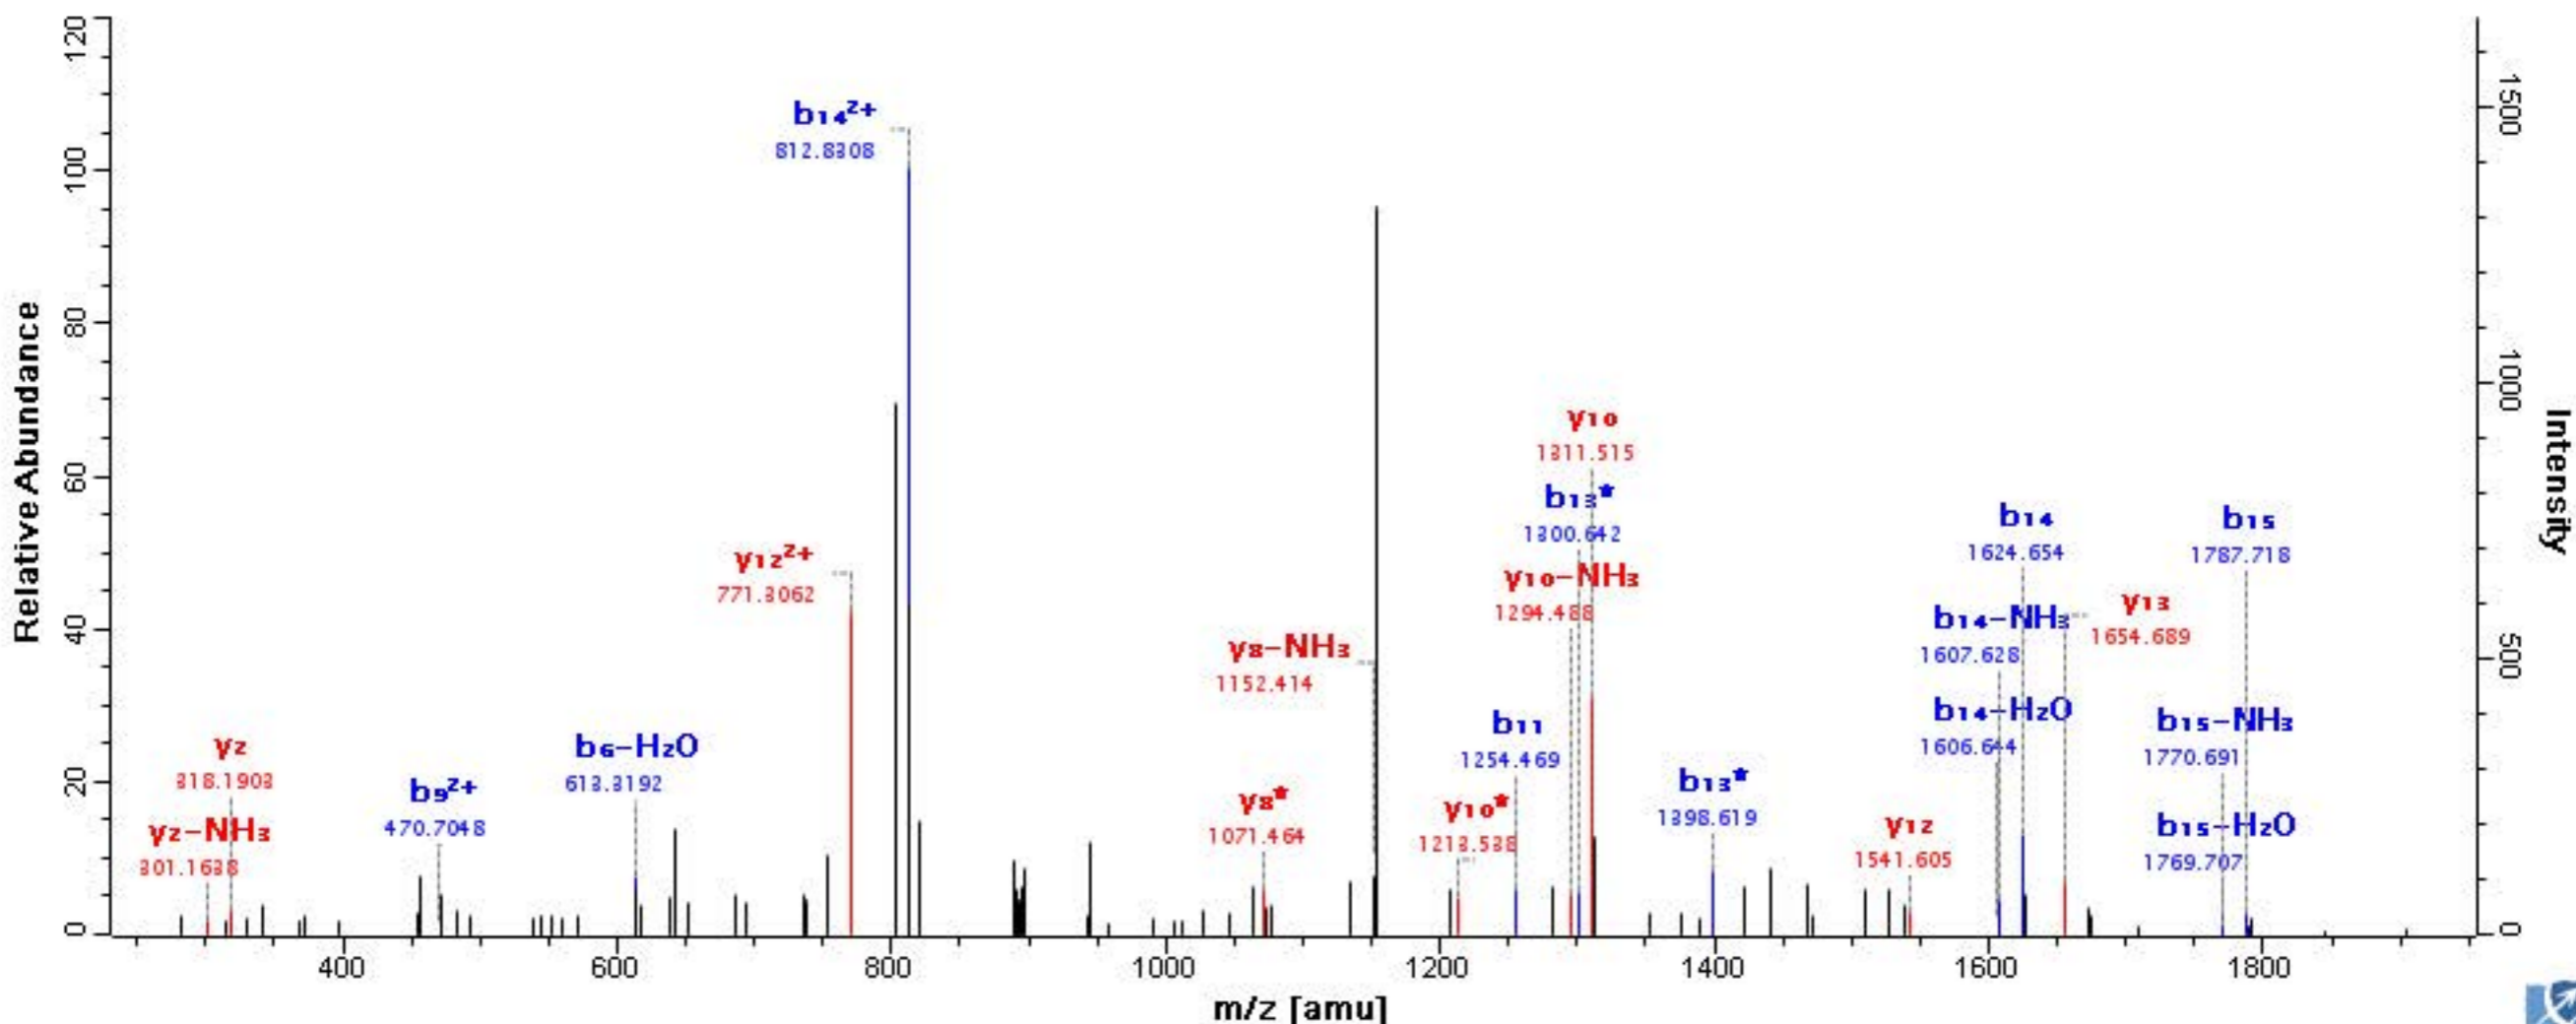

#### precursor information

|                   |                     |
|-------------------|---------------------|
| Mass:             | 1932.817            |
| m/z:              | System.Collections. |
| Charge:           | System.Collections. |
| Retentiontime:    | System.Collections. |
| Score:            | 71.78071            |
| Mass Error [ppm]: | 0.5642              |
| PEP:              | 0.0012491           |
| Precursor Type:   | MULTI               |

| b <sup>2+</sup> ion |          | b ion     |          |     | y ion |          | y <sup>2+</sup> ion |           |          |           |
|---------------------|----------|-----------|----------|-----|-------|----------|---------------------|-----------|----------|-----------|
| Δ dalton            | mass     | Δ dalton  | mass     | seq |       | Δ dalton | mass                | Δ dalton  | mass     |           |
|                     | 88.0393  |           | 88.0393  | 1   | S     | 15       |                     |           |          |           |
|                     | 175.0713 |           | 175.0713 | 2   | S     | 14       | 1854.805            |           | 1854.805 |           |
|                     | 288.1554 |           | 288.1554 | 3   | I     | 13       | 1767.773            |           | 1767.773 |           |
|                     | 401.2395 |           | 401.2395 | 4   | I     | 12       | 1654.689            | +0.002756 | 1654.689 |           |
|                     | 530.2821 |           | 530.2821 | 5   | E     | 11       | 1541.605            | +0.255887 | 771.3062 | +0.097023 |
|                     | 631.3297 |           | 631.3297 | 6   | T     | 10       | 1412.563            |           | 1412.563 |           |
|                     | 702.3668 |           | 702.3668 | 7   | A     | 9        | 1311.515            | +0.142912 | 1311.515 |           |
|                     | 773.404  |           | 773.404  | 8   | A     | 8        | 1240.478            |           | 1240.478 |           |
| +0.380957           | 470.7048 |           | 940.4023 | 9   | S     | 7        | 1169.441            |           | 1169.441 |           |
|                     | 1107.401 |           | 1107.401 | 10  | S     | 6        | 1002.442            |           | 1002.442 |           |
|                     | 1254.469 | +0.146631 | 1254.469 | 11  | F     | 5        | 835.444             |           | 835.444  |           |
|                     | 1367.553 |           | 1367.553 | 12  | I     | 4        | 688.3756            |           | 688.3756 |           |
|                     | 1496.596 |           | 1496.596 | 13  | E     | 3        | 575.2915            |           | 575.2915 |           |
| +0.033151           | 812.8308 | -0.077056 | 1624.654 | 14  | Q     | 2        | 446.2489            |           | 446.2489 |           |
|                     | 1787.718 | +0.246334 | 1787.718 | 15  | Y     | 1        | 318.1903            | -0.042871 | 318.1903 |           |
|                     |          |           |          | 16  | K     | 0        | 155.127             |           | 155.127  |           |

#### general information

|                       |             |
|-----------------------|-------------|
| Annotation:           | 9 of 16     |
| AminoAcids Coverag    | 56 %        |
| Intensity Coverage:   | 31 %        |
| Protein Localisation: | 129 ... 144 |

Source: 201 20530\_VR\_Bsu\_TripleSILAC\_pWTPPrkPrpC\_FD3  
 Scannumber: 12359  
 Protein: BSU22880; jofD; ypfD  
 Peptide Score: 135.23  
 Method: ITMS; CID; 3

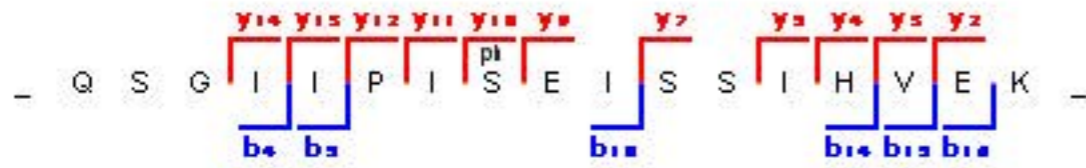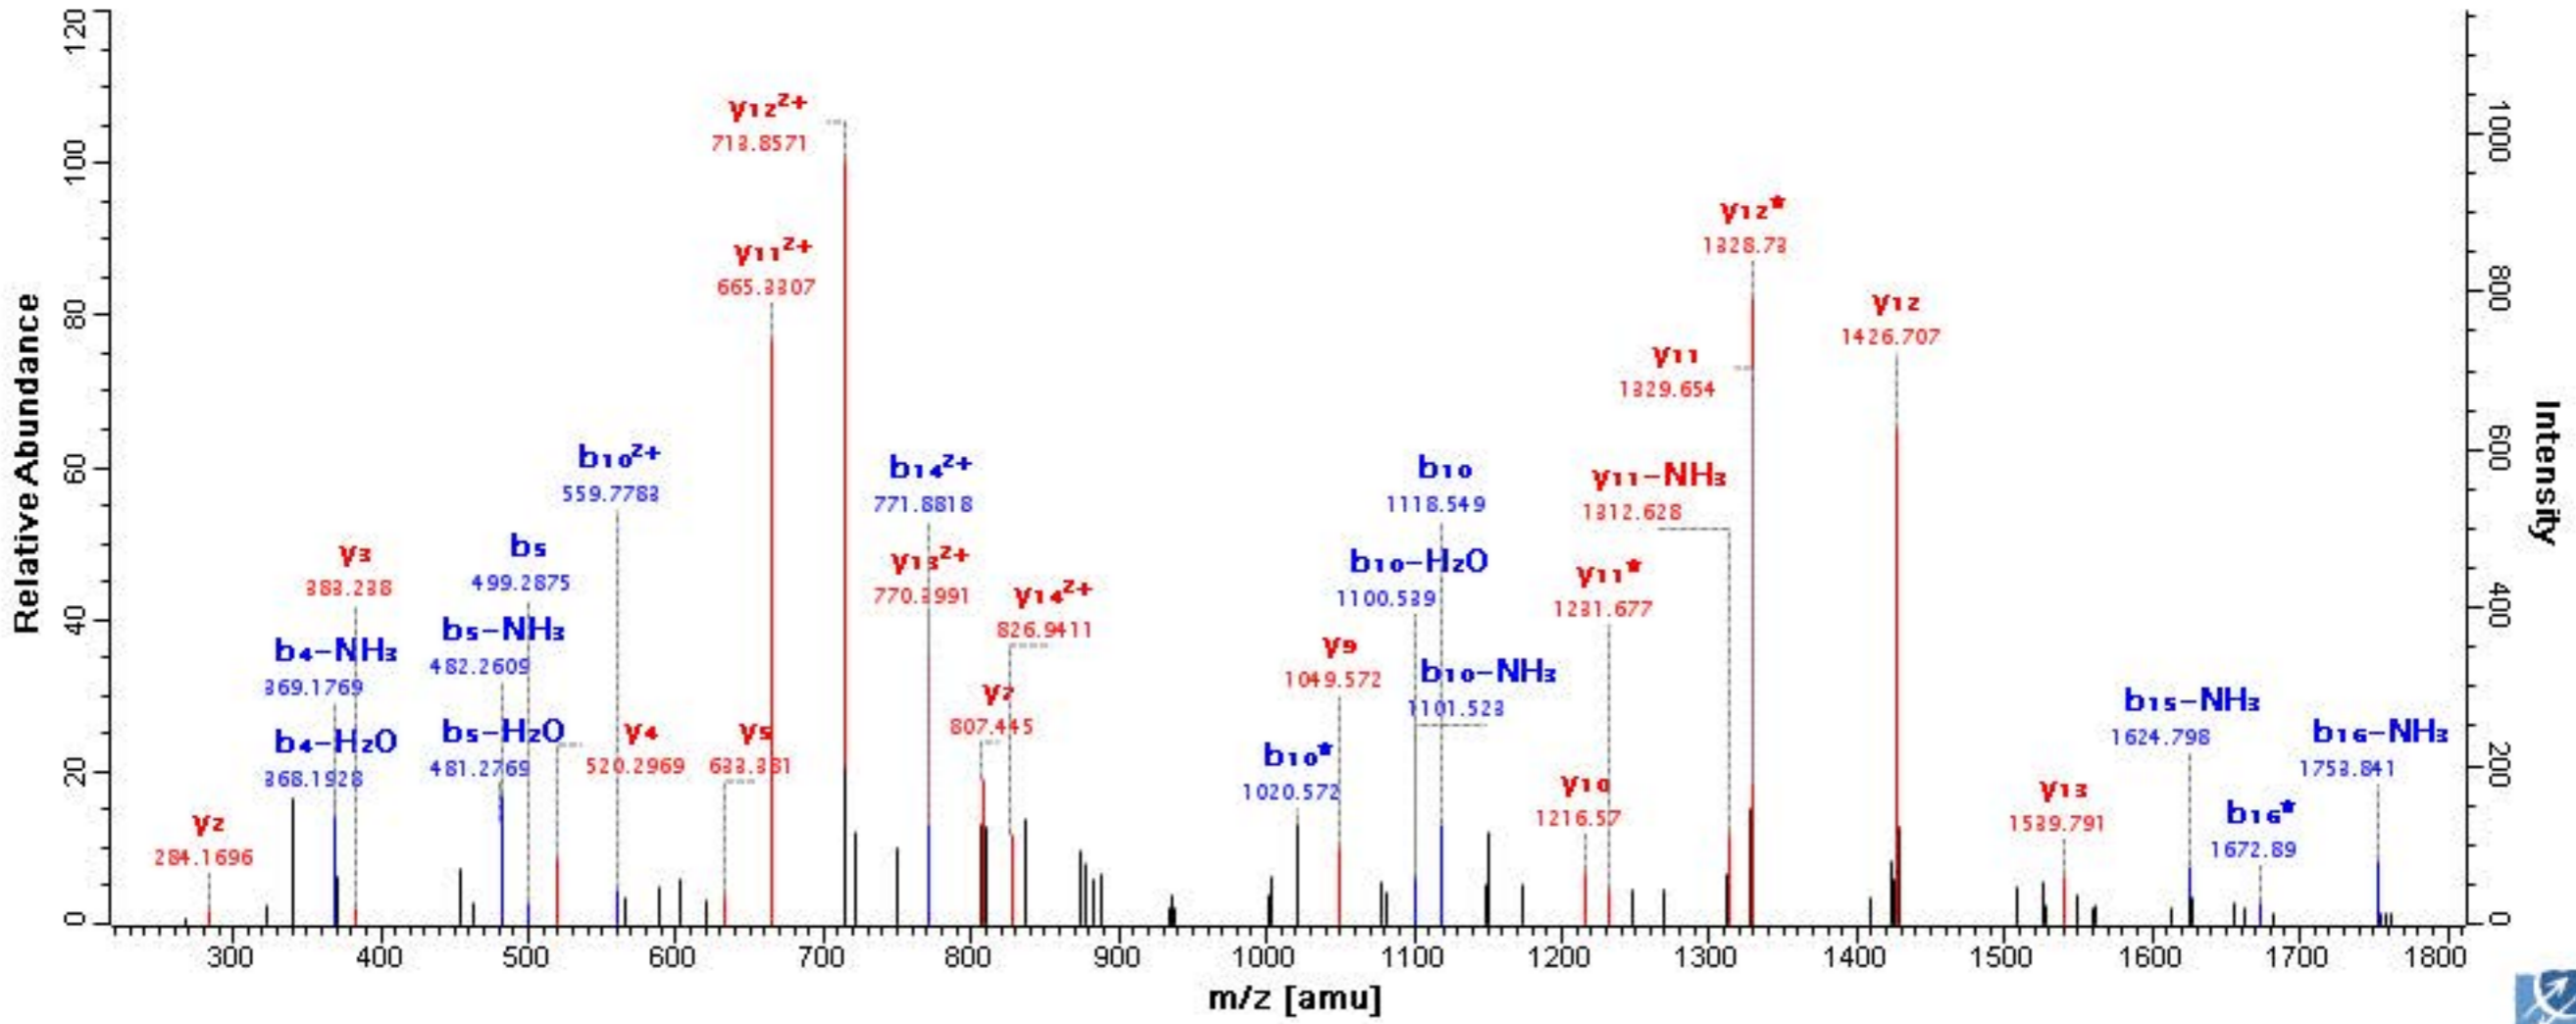

**precursor information**

|                   |                     |
|-------------------|---------------------|
| Mass:             | 1915.96744          |
| m/z:              | System.Collections. |
| Charge:           | System.Collections. |
| Retentiontime:    | System.Collections. |
| Score:            | 135.2347            |
| Mass Error [ppm]: | 0.95169             |
| PEP:              | 1.0352E-17          |
| Precursor Type:   | MULTI               |

| b <sup>2+</sup> ion |          | b ion     |          | seq |   |    | y ion    |           | y <sup>2+</sup> ion |           |
|---------------------|----------|-----------|----------|-----|---|----|----------|-----------|---------------------|-----------|
| Δ dalton            | mass     | Δ dalton  | mass     |     |   |    | Δ dalton | mass      | Δ dalton            | mass      |
|                     | 129.0659 |           | 129.0659 | 1   | Q | 16 |          |           |                     |           |
|                     | 216.0979 |           | 216.0979 | 2   | S | 15 | 1796.929 |           | 1796.929            |           |
|                     | 273.1193 |           | 273.1193 | 3   | G | 14 | 1709.896 |           | 1709.896            |           |
|                     | 386.2034 |           | 386.2034 | 4   | I | 13 | 1652.875 |           | 826.9411            | +0.201128 |
|                     | 499.2875 | +0.086366 | 499.2875 | 5   | I | 12 | 1539.791 | +0.369328 | 770.3991            | +0.051387 |
|                     | 596.3402 |           | 596.3402 | 6   | P | 11 | 1426.707 | +0.060081 | 713.8571            | -0.046779 |
|                     | 709.4243 |           | 709.4243 | 7   | I | 10 | 1329.654 | +0.127494 | 665.3307            | -0.359203 |
|                     | 876.4227 |           | 876.4227 | 8   | S | 9  | 1216.57  | +0.131357 | 1216.57             |           |
|                     | 1005.465 |           | 1005.465 | 9   | E | 8  | 1049.572 | +0.186845 | 1049.572            |           |
| +0.135643           | 559.7783 | -0.150026 | 1118.549 | 10  | I | 7  | 920.5291 |           | 920.5291            |           |
|                     | 1205.581 |           | 1205.581 | 11  | S | 6  | 807.445  | +0.10226  | 807.445             |           |
|                     | 1292.613 |           | 1292.613 | 12  | S | 5  | 720.413  |           | 720.413             |           |
|                     | 1405.697 |           | 1405.697 | 13  | I | 4  | 633.381  | +0.02386  | 633.381             |           |
| -0.324013           | 771.8818 |           | 1542.756 | 14  | H | 3  | 520.2969 | +0.043837 | 520.2969            |           |
|                     | 1641.825 |           | 1641.825 | 15  | V | 2  | 383.238  | +0.066403 | 383.238             |           |
|                     | 1770.867 |           | 1770.867 | 16  | E | 1  | 284.1696 | -0.0189   | 284.1696            |           |
|                     |          |           |          | 17  | K | 0  | 155.127  |           | 155.127             |           |

**general information**

|                       |           |
|-----------------------|-----------|
| Annotation:           | 12 of 17  |
| AminoAcids Coverag    | 71 %      |
| Intensity Coverage:   | 62 %      |
| Protein Localisation: | 40 ... 56 |

Source: 201 20530\_VR\_Bsu\_TripleSILAC\_pWTPPrkCPrpC\_F03  
 Scannumber: 13148  
 Protein: BSU00940; cys5; spnA  
 Peptide Score: 145.17  
 Method: ITMS; CID; 3

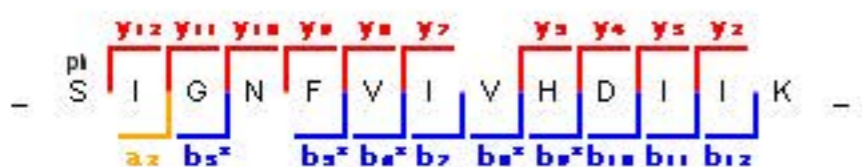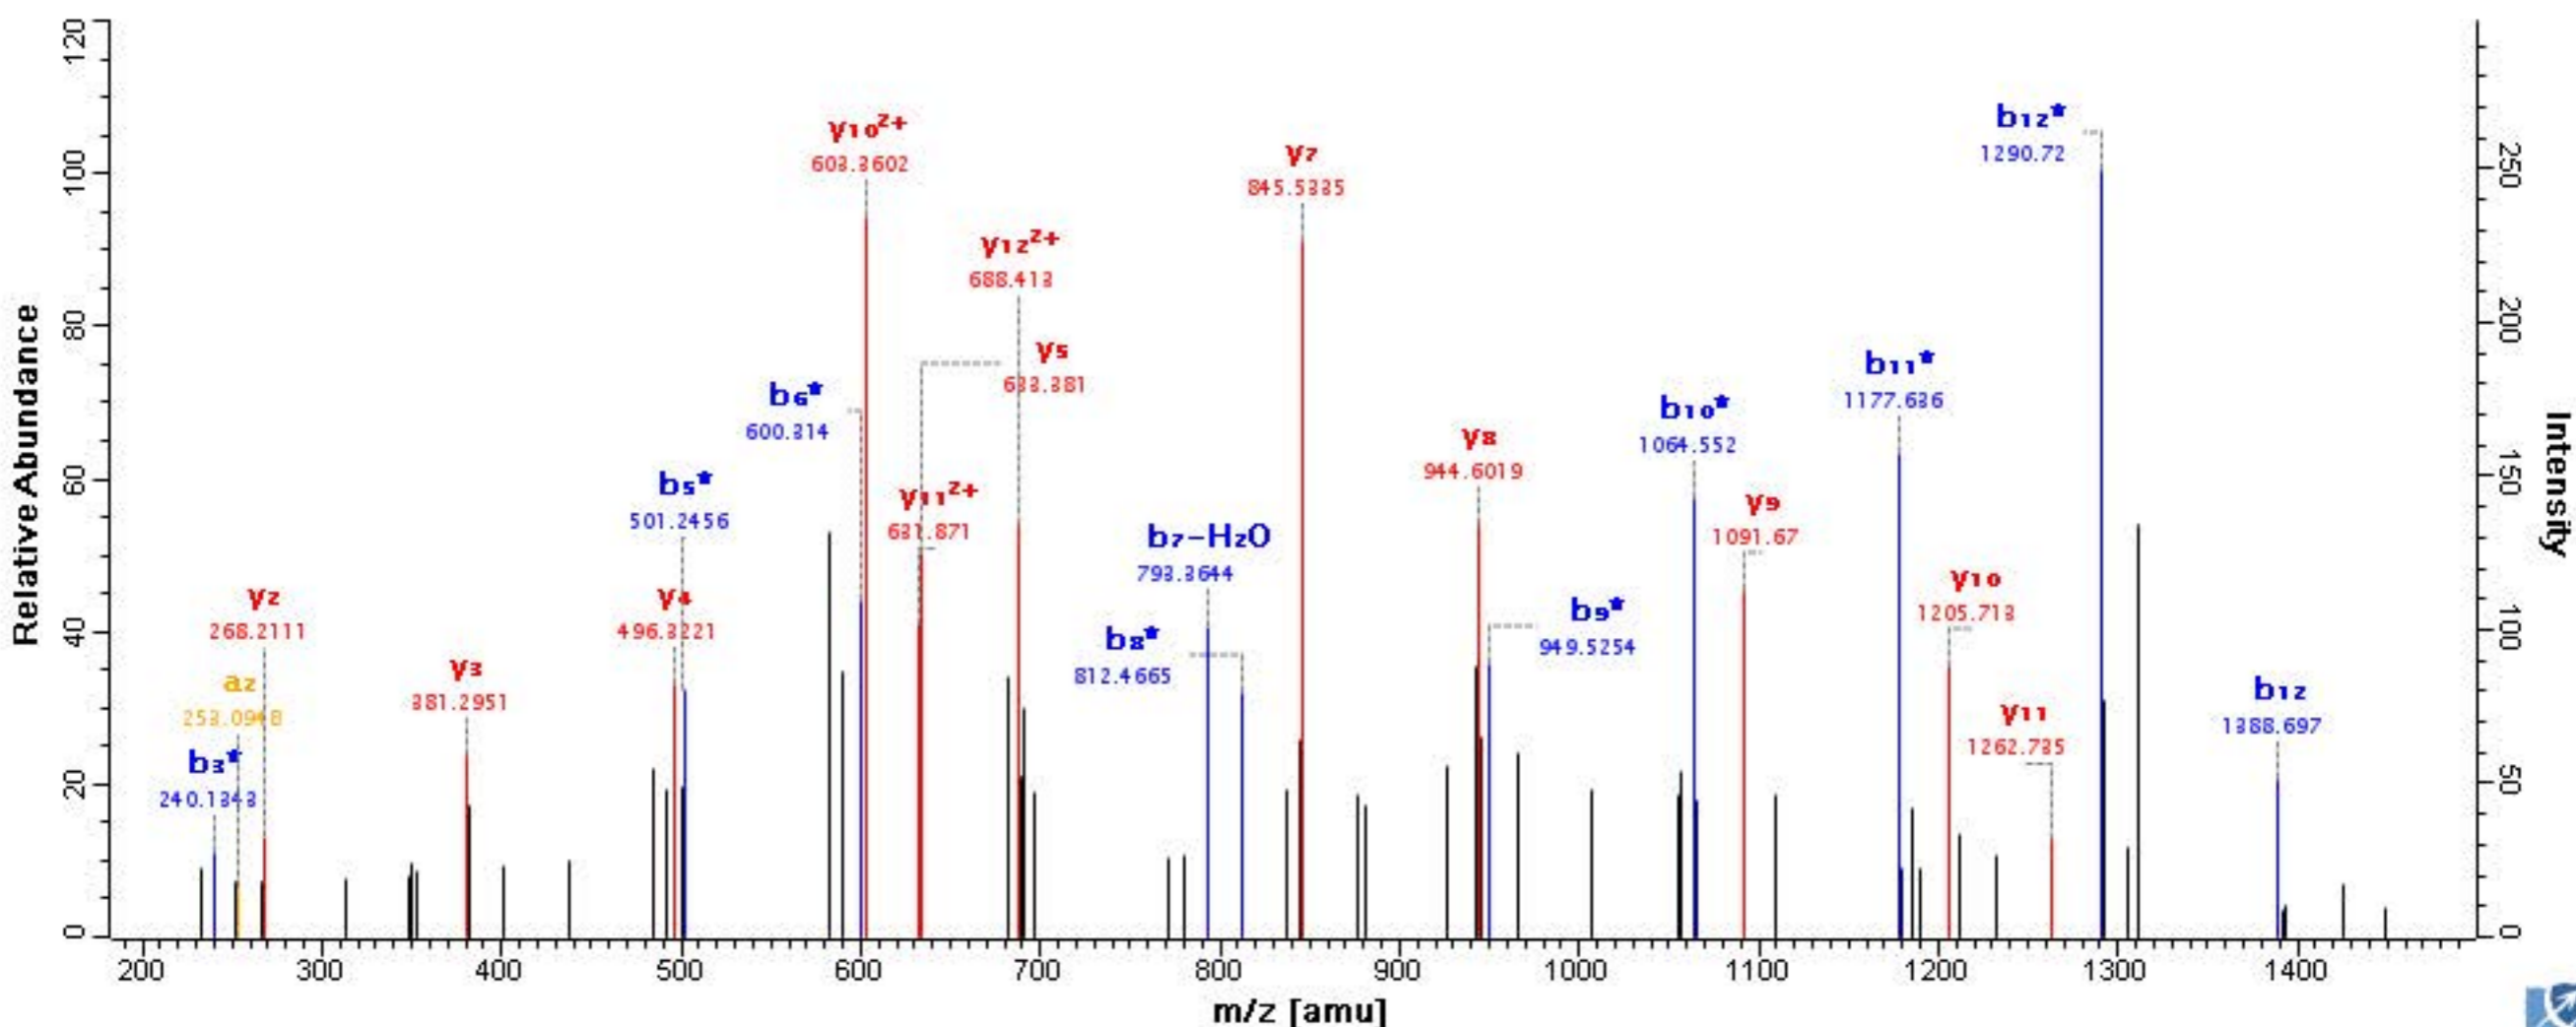

**precursor information**

|                   |                     |
|-------------------|---------------------|
| Mass:             | 1533.79606          |
| m/z:              | System.Collections. |
| Charge:           | System.Collections. |
| Retentiontime:    | System.Collections. |
| Score:            | 145.1657            |
| Mass Error [ppm]: | 0.2775              |
| PEP:              | 3.8387E-19          |
| Precursor Type:   | MULTI               |

**general information**

|                       |             |
|-----------------------|-------------|
| Annotation:           | 11 of 13    |
| AminoAcids Coverag    | 85 %        |
| Intensity Coverage:   | 54 %        |
| Protein Localisation: | 270 ... 282 |

| a ion     |          | b ion    |          |     | y ion |          | y <sup>2+</sup> ion |          |           |
|-----------|----------|----------|----------|-----|-------|----------|---------------------|----------|-----------|
| Δ dalton  | mass     | Δ dalton | mass     | seq |       | Δ dalton | mass                | Δ dalton | mass      |
|           | 140.0107 |          | 168.0056 | 1   | S     |          |                     |          |           |
| +0.227603 | 253.0948 |          | 281.0897 | 2   | I     | 1375.819 |                     | 688.413  | +0.032972 |
|           | 310.1162 |          | 338.1112 | 3   | G     | 1262.735 | +0.017637           | 631.871  | -0.078621 |
|           | 424.1592 |          | 452.1541 | 4   | N     | 1205.713 | +0.075111           | 603.3602 | +0.080365 |
|           | 571.2276 |          | 599.2225 | 5   | F     | 1091.67  | +0.046749           | 1091.67  |           |
|           | 670.296  |          | 698.2909 | 6   | V     | 944.6019 | -0.111155           | 944.6019 |           |
|           | 783.3801 |          | 811.375  | 7   | I     | 845.5335 | +0.193709           | 845.5335 |           |
|           | 882.4485 |          | 910.4434 | 8   | V     | 732.4494 |                     | 732.4494 |           |
|           | 1019.507 |          | 1047.502 | 9   | H     | 633.381  | -0.099064           | 633.381  |           |
|           | 1134.534 |          | 1162.529 | 10  | D     | 496.3221 | +0.05848            | 496.3221 |           |
|           | 1247.618 |          | 1275.613 | 11  | I     | 381.2951 | +0.0416             | 381.2951 |           |
|           | 1360.702 | +0.05079 | 1388.697 | 12  | I     | 268.2111 | +0.175896           | 268.2111 |           |
|           |          |          |          | 13  | K     | 155.127  |                     | 155.127  |           |



Source: 20120530\_VR\_Bsu\_TripleSILAC\_pWTPPrkCPrpC\_FD3  
 Scannumber: 13295  
 Protein: BSU03480; srfA; srfA1; srfAA  
 Peptide Score: 198.87  
 Method: ITMS; CID; 3

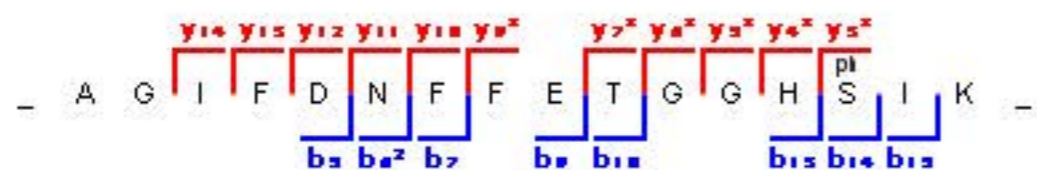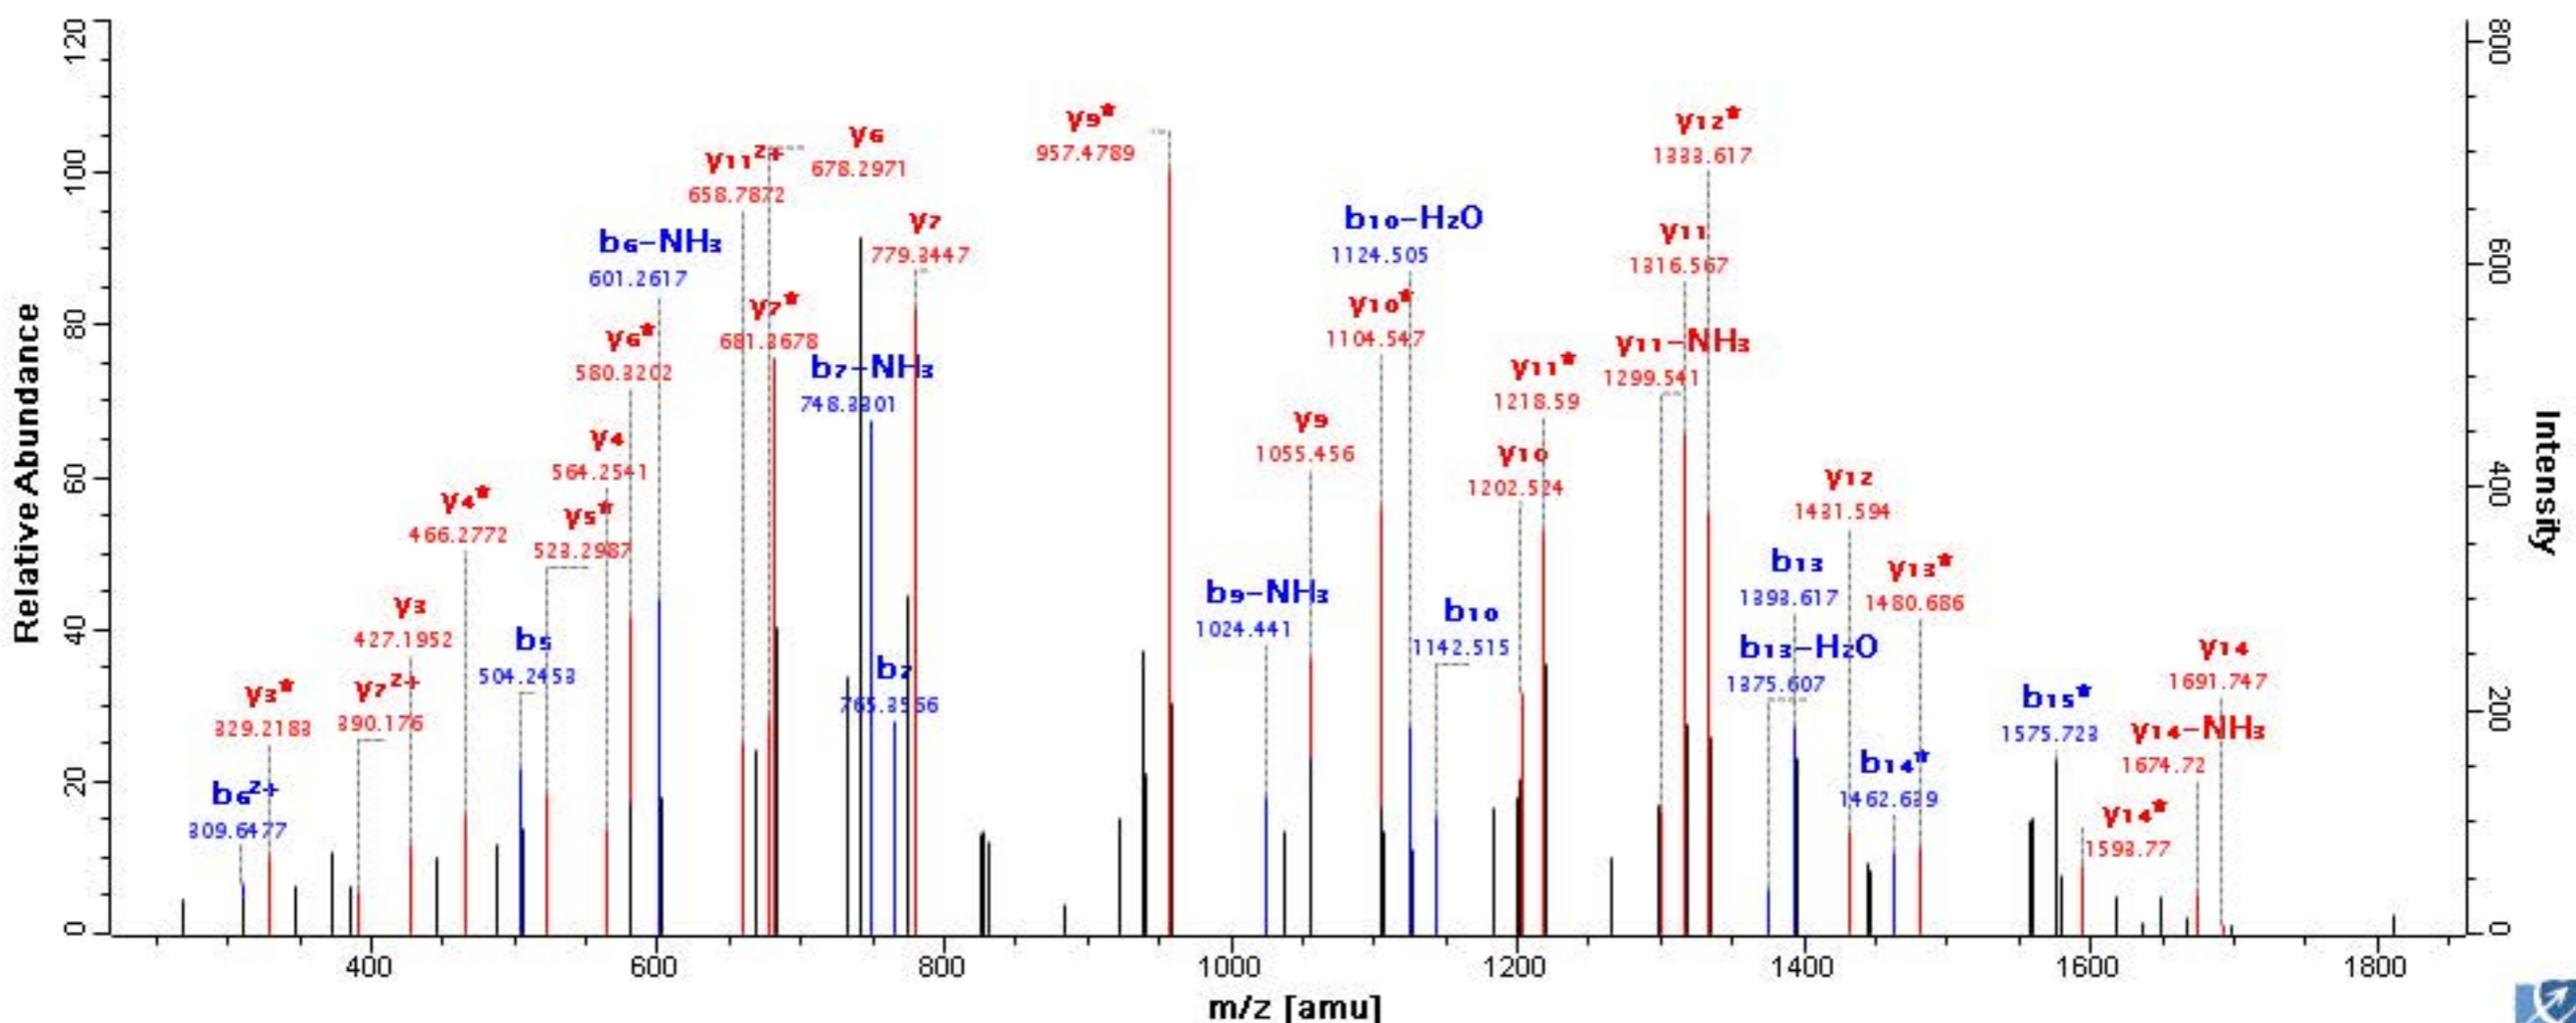

#### precursor information

|                   |                     |
|-------------------|---------------------|
| Mass:             | 1818.79783          |
| m/z:              | System.Collections. |
| Charge:           | System.Collections. |
| Retentiontime:    | System.Collections. |
| Score:            | 198.8673            |
| Mass Error [ppm]: | 0.007619            |
| PEP:              | 3.1608E-57          |
| Precursor Type:   | MULTI               |

| b <sup>2+</sup> ion |          | b ion     |          |     | gamma ion |          | gamma <sup>2+</sup> ion |           |          |           |
|---------------------|----------|-----------|----------|-----|-----------|----------|-------------------------|-----------|----------|-----------|
| Δ dalton            | mass     | Δ dalton  | mass     | seq |           | Δ dalton | mass                    | Δ dalton  | mass     |           |
|                     | 72.04439 |           | 72.04439 | 1   | A         | 15       |                         |           |          |           |
|                     | 129.0659 |           | 129.0659 | 2   | G         | 14       | 1748.768                |           | 1748.768 |           |
|                     | 242.1499 |           | 242.1499 | 3   | I         | 13       | 1691.747                | +0.143379 | 1691.747 |           |
|                     | 389.2183 |           | 389.2183 | 4   | F         | 12       | 1578.662                |           | 1578.662 |           |
|                     | 504.2453 | +0.031703 | 504.2453 | 5   | D         | 11       | 1431.594                | -0.037762 | 1431.594 |           |
| +0.411098           | 309.6477 |           | 618.2882 | 6   | N         | 10       | 1316.567                | +0.139328 | 658.7872 | +0.393296 |
|                     | 765.3566 | +0.015515 | 765.3566 | 7   | F         | 9        | 1202.524                | +0.179326 | 1202.524 |           |
|                     | 912.425  |           | 912.425  | 8   | F         | 8        | 1055.456                | +0.100156 | 1055.456 |           |
|                     | 1041.468 |           | 1041.468 | 9   | E         | 7        | 908.3873                |           | 908.3873 |           |
|                     | 1142.515 | -0.127362 | 1142.515 | 10  | T         | 6        | 779.3447                | +0.19035  | 390.176  | +0.162429 |
|                     | 1199.537 |           | 1199.537 | 11  | G         | 5        | 678.2971                | -0.067147 | 678.2971 |           |
|                     | 1256.558 |           | 1256.558 | 12  | G         | 4        | 621.2756                |           | 621.2756 |           |
|                     | 1393.617 | +0.126023 | 1393.617 | 13  | H         | 3        | 564.2541                | +0.107372 | 564.2541 |           |
|                     | 1560.615 |           | 1560.615 | 14  | S         | 2        | 427.1952                | +0.111841 | 427.1952 |           |
|                     | 1673.7   |           | 1673.7   | 15  | I         | 1        | 260.1969                |           | 260.1969 |           |
|                     |          |           |          | 16  | K         | 0        | 147.1128                |           | 147.1128 |           |

#### general information

|                       |              |
|-----------------------|--------------|
| Annotation:           | 13 of 16     |
| AminoAcids Coverag    | 81 %         |
| Intensity Coverage:   | 55 %         |
| Protein Localisation: | 993 ... 1008 |

Source: 20120530\_VR\_Bsu\_TripleSILAC\_pWTPPrkCPrpC\_FD3  
 Scannumber: 13415  
 Protein: BSU23500; drm; yqkN  
 Peptide Score: 171.08  
 Method: ITMS; CID; 3

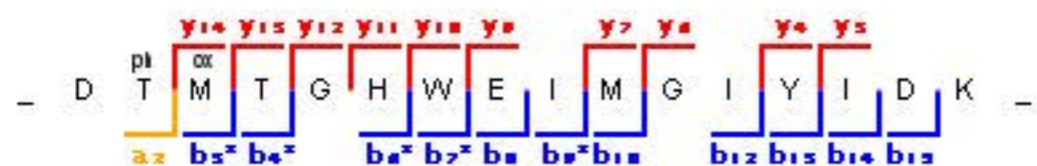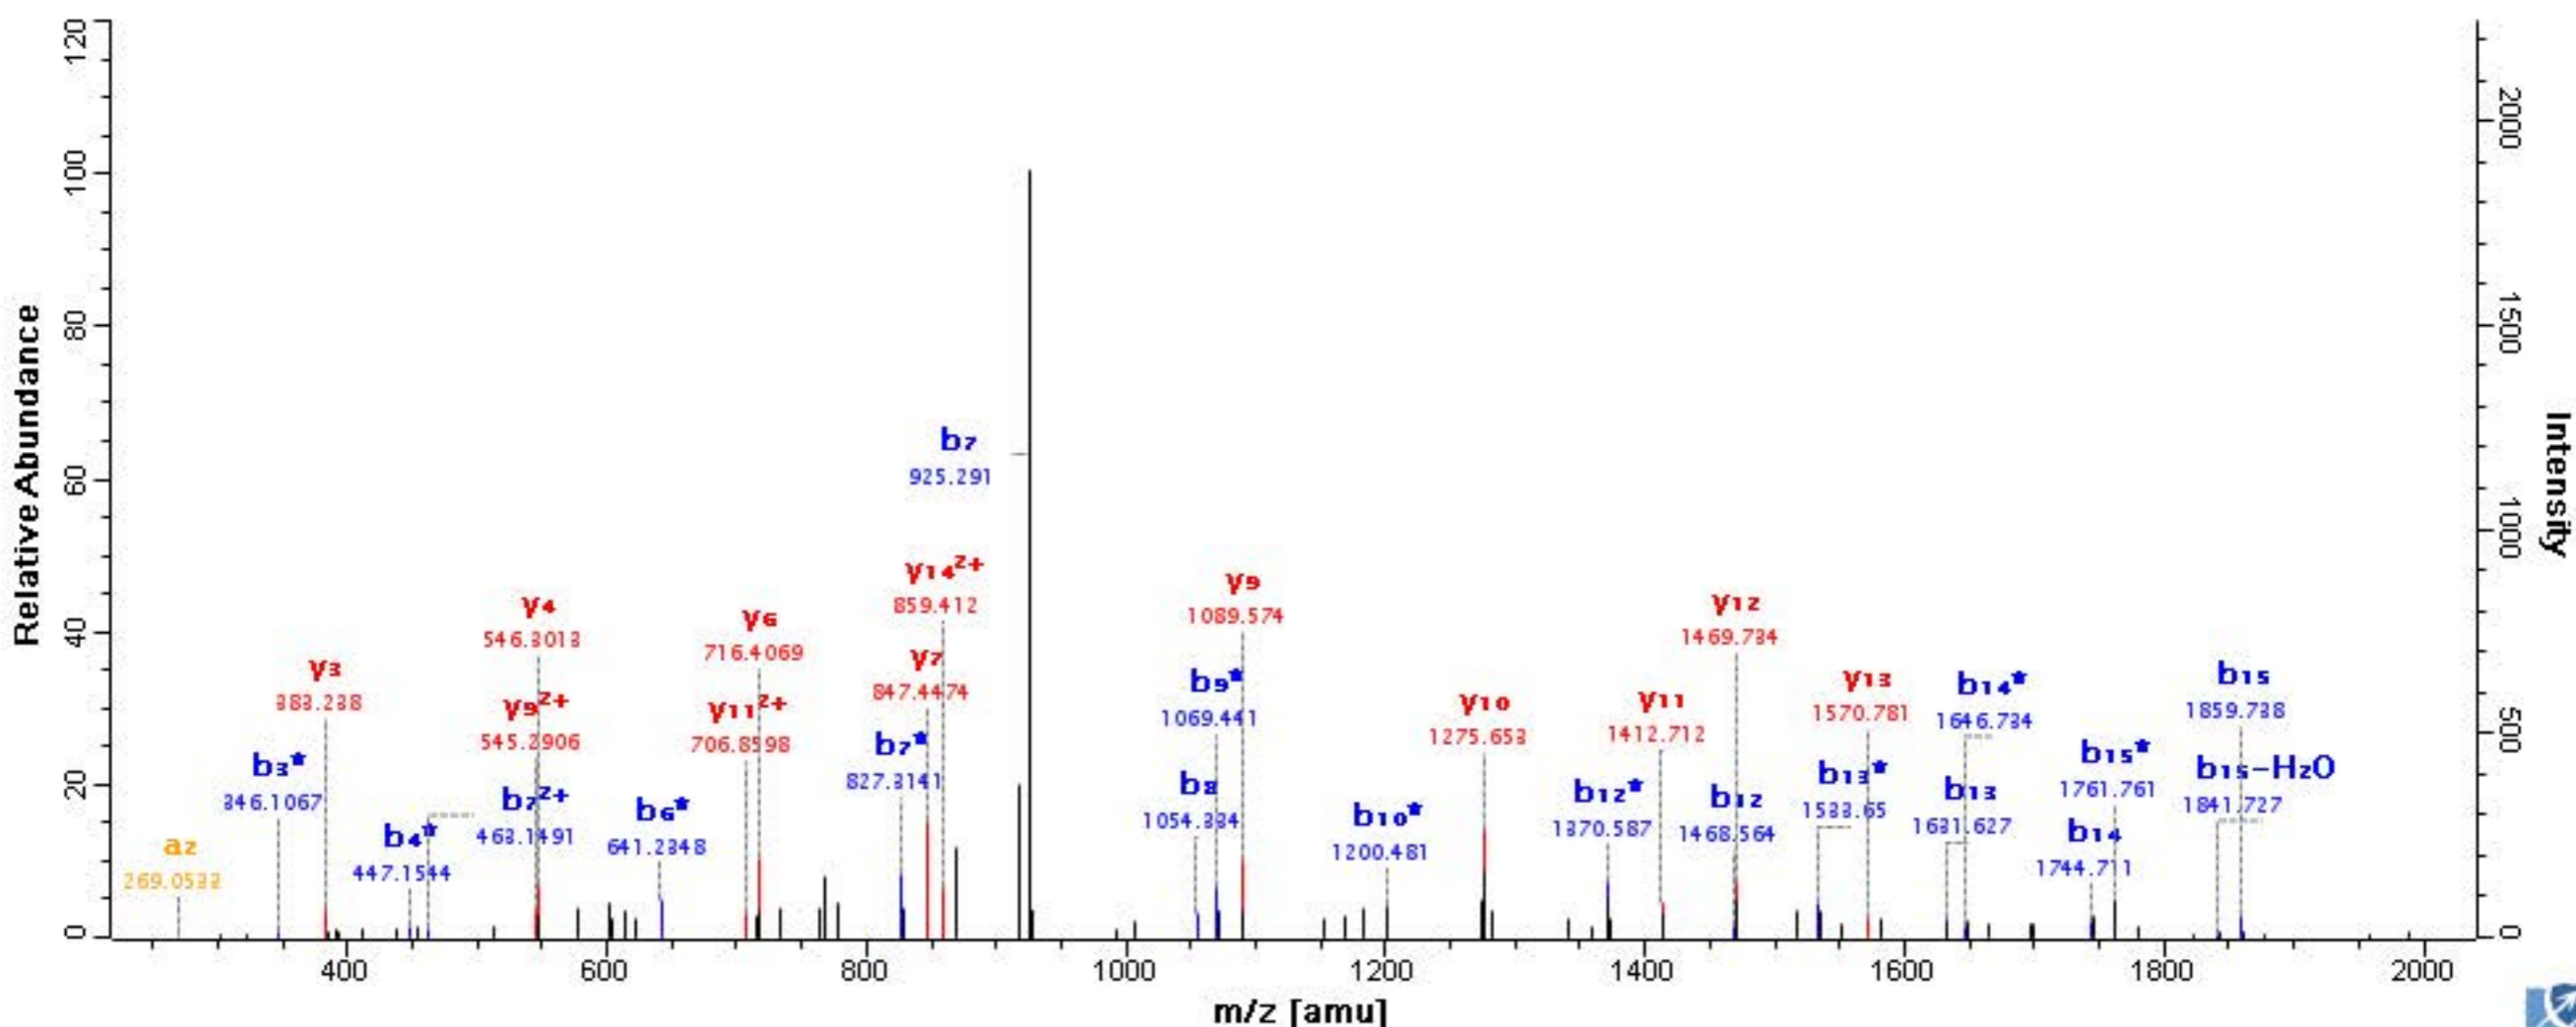

**precursor information**

|                   |                     |
|-------------------|---------------------|
| Mass:             | 2004.83703          |
| m/z:              | System.Collections. |
| Charge:           | System.Collections. |
| Retentiontime:    | System.Collections. |
| Score:            | 171.0793            |
| Mass Error [ppm]: | 0.38705             |
| PEP:              | 6.2258E-34          |
| Precursor Type:   | MULTI               |

| a ion    |         | b <sup>2+</sup> ion |         | b ion    |         |    |     |    | γ ion    |          | γ <sup>2+</sup> ion |          |
|----------|---------|---------------------|---------|----------|---------|----|-----|----|----------|----------|---------------------|----------|
| Δ dalton | mass    | Δ dalton            | mass    | Δ dalton | mass    |    | seq |    | Δ dalton | mass     | Δ dalton            | mass     |
|          | 88.0393 |                     | 116.034 |          | 116.034 | 1  | D   | 15 |          |          |                     |          |
| +0.11316 | 269.053 |                     | 297.048 |          | 297.048 | 2  | T   | 14 | 1898.83  |          | 1898.83             |          |
|          | 416.089 |                     | 444.084 |          | 444.084 | 3  | M   | 13 | 1717.82  |          | 859.412             | -0.1044  |
|          | 517.136 |                     | 545.131 |          | 545.131 | 4  | T   | 12 | 1570.78  | -0.0127  | 1570.78             |          |
|          | 574.158 |                     | 602.153 |          | 602.153 | 5  | G   | 11 | 1469.73  | -0.076   | 1469.73             |          |
|          | 711.217 |                     | 739.212 |          | 739.212 | 6  | H   | 10 | 1412.71  | +0.09282 | 706.86              | +0.476   |
|          | 897.296 | -0.2428             | 463.149 | -0.1811  | 925.291 | 7  | W   | 9  | 1275.65  | +0.05981 | 1275.65             |          |
|          | 1026.34 |                     | 1054.33 | +0.15469 | 1054.33 | 8  | E   | 8  | 1089.57  | +0.08859 | 545.291             | +0.47486 |
|          | 1139.42 |                     | 1167.42 |          | 1167.42 | 9  | I   | 7  | 960.531  |          | 960.531             |          |
|          | 1270.46 |                     | 1298.46 |          | 1298.46 | 10 | M   | 6  | 847.447  | +0.13236 | 847.447             |          |
|          | 1327.48 |                     | 1355.48 |          | 1355.48 | 11 | G   | 5  | 716.407  | +0.04186 | 716.407             |          |
|          | 1440.57 |                     | 1468.56 | +0.14617 | 1468.56 | 12 | I   | 4  | 659.385  |          | 659.385             |          |
|          | 1603.63 |                     | 1631.63 | +0.03499 | 1631.63 | 13 | Y   | 3  | 546.301  | +0.09527 | 546.301             |          |
|          | 1716.72 |                     | 1744.71 | +0.03711 | 1744.71 | 14 | I   | 2  | 383.238  | +0.02334 | 383.238             |          |
|          | 1831.74 |                     | 1859.74 | +0.3195  | 1859.74 | 15 | D   | 1  | 270.154  |          | 270.154             |          |
|          |         |                     |         |          |         | 16 | K   | 0  | 155.127  |          | 155.127             |          |

**general information**

|                       |            |
|-----------------------|------------|
| Annotation:           | 14 of 16   |
| AminoAcids Coverage:  | 88 %       |
| Intensity Coverage:   | 33 %       |
| Protein Localisation: | 86 ... 101 |

Source: 20120530\_VR\_Bsu\_TripleSILAC\_pWTPPrkCPrpC\_F03  
 Scannumber: 3650  
 Protein: BSU01260; rpIN  
 Peptide Score: 106.2  
 Method: ITMS; CID; 3

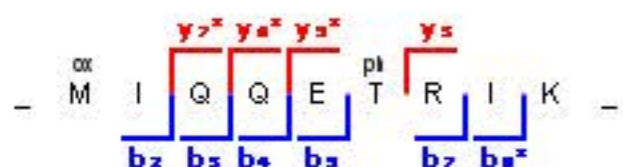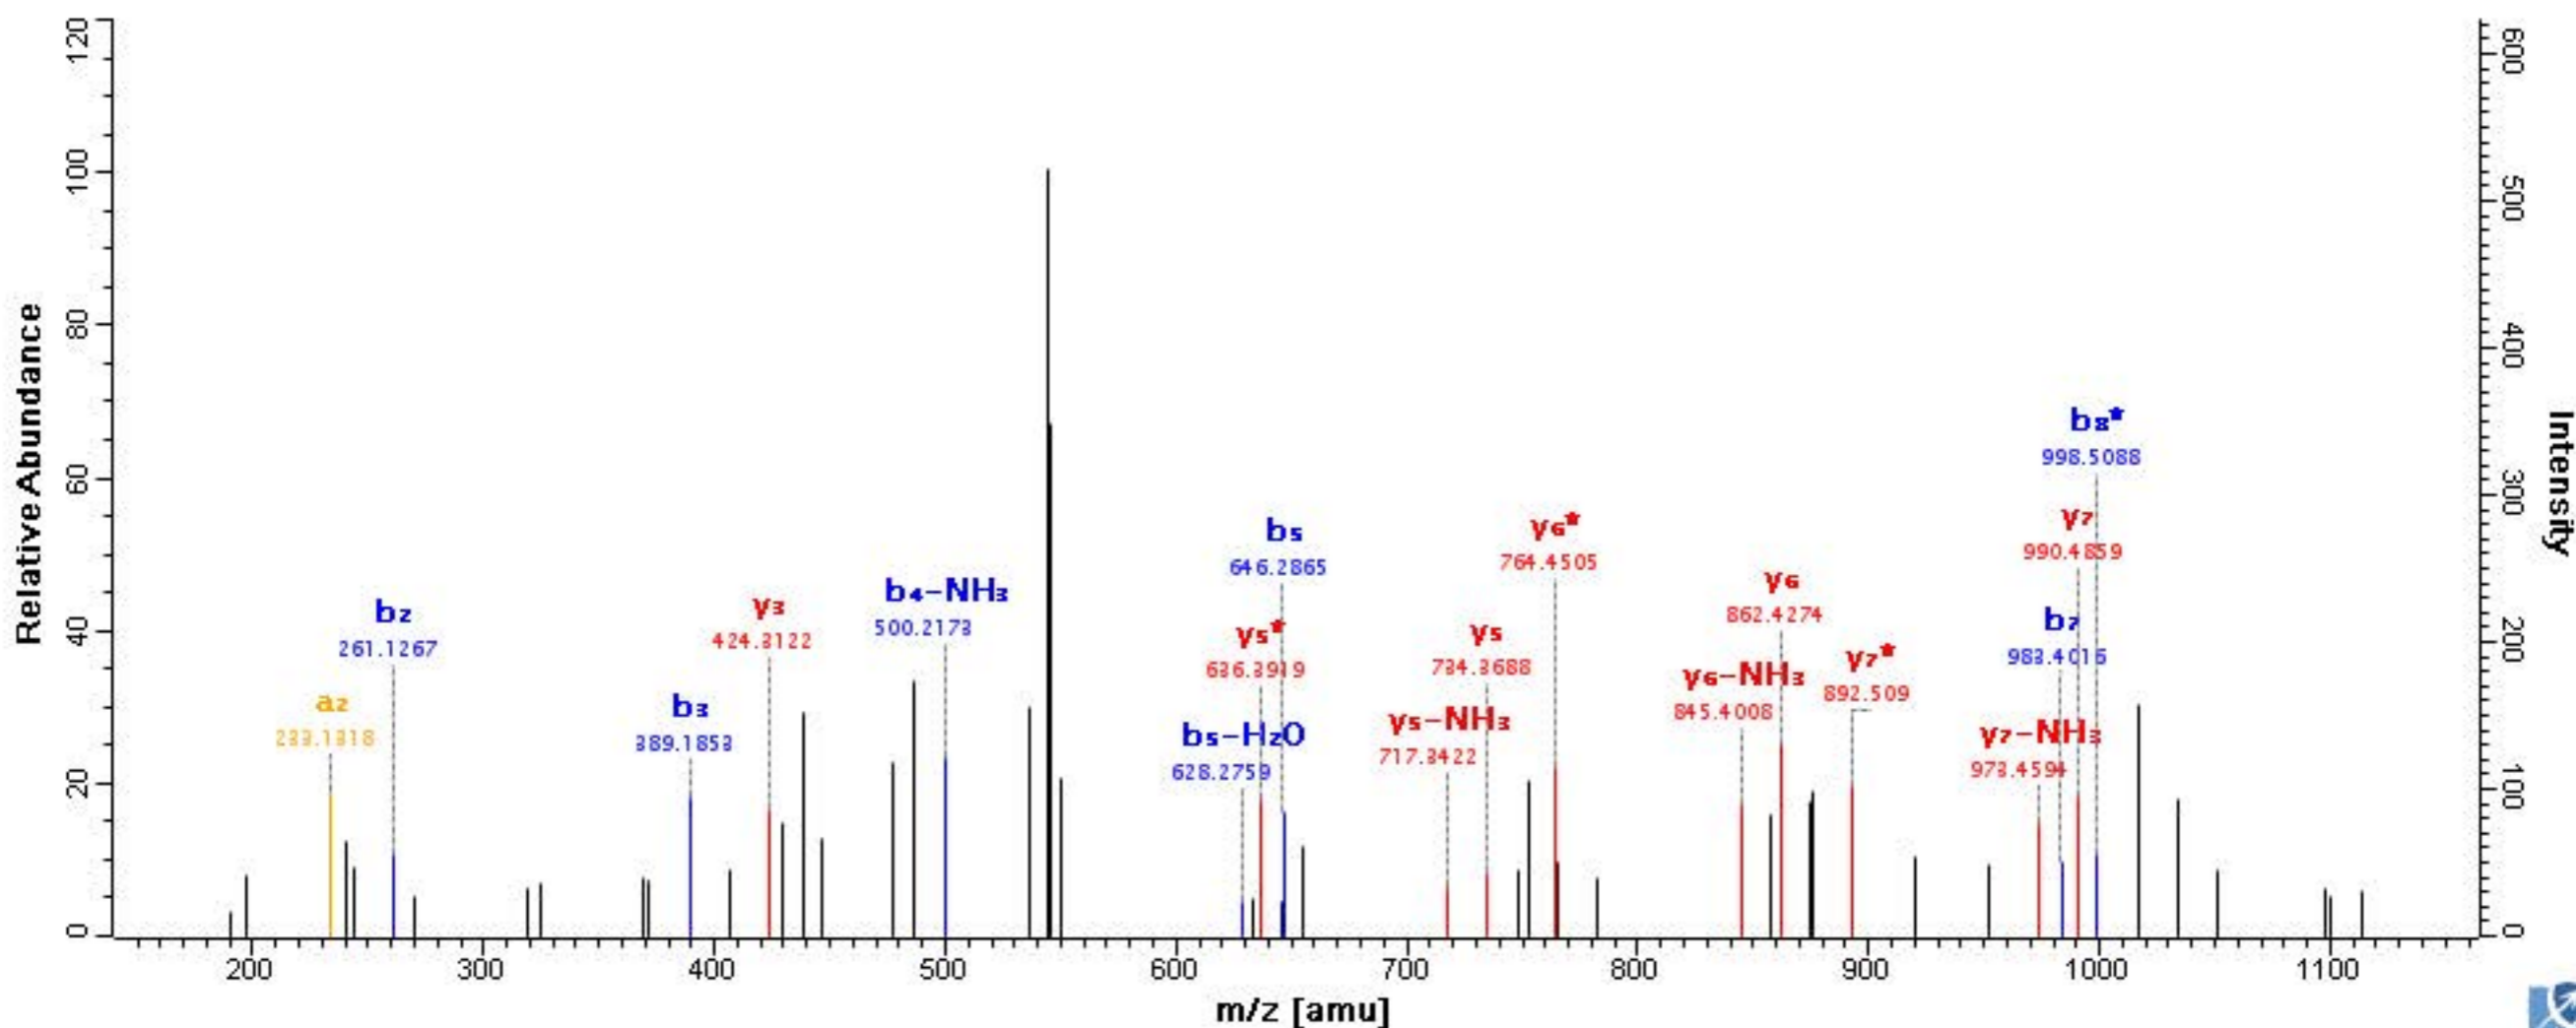

#### precursor information

|                       |                     |
|-----------------------|---------------------|
| Mass:                 | 0                   |
| m/z:                  | System.Collections. |
| Charge:               | System.Collections. |
| Retentiontime:        | System.Collections. |
| Score:                | 106.1988            |
| Mass Error [ppm]:     | -0.14585            |
| PEP:                  | 0.00069238          |
| g Precursor Type:     | PEAK                |
| Annotation:           | 6 of 9              |
| AminoAcids Coverag    | 67 %                |
| Intensity Coverage:   | 29 %                |
| Protein Localisation: | 1 ... 9             |

| a ion           |              | b ion           |              |     | y ion           |      |
|-----------------|--------------|-----------------|--------------|-----|-----------------|------|
| $\Delta$ dalton | mass         | $\Delta$ dalton | mass         | seq | $\Delta$ dalton | mass |
|                 | 120.04776107 |                 | 148.04267569 | 1   | M               | 8    |
| +0.04182        | 233.13182505 | +0.1506346      | 261.12673968 | 2   | I               | 7    |
|                 | 361.19040256 | +0.2156838      | 389.18531719 | 3   | Q               | 6    |
|                 | 489.24898008 |                 | 517.2438947  | 4   | Q               | 5    |
|                 | 618.29157317 | +0.1625479      | 646.28648779 | 5   | E               | 4    |
|                 | 799.30558205 |                 | 827.30049668 | 6   | T               | 3    |
|                 | 955.40669308 | +0.1328772      | 983.4016077  | 7   | R               | 2    |
|                 | 1068.4907571 |                 | 1096.4856717 | 8   | I               | 1    |
|                 |              |                 |              | 9   | K               | 0    |

Source: 201 20530\_VR\_Bsu\_TripleSILAC\_pWTPPrkCPrpC\_F03  
 Scannumber: 3909  
 Protein: BSU41000; gidB; rsmG  
 Peptide Score: 52.5  
 Method: ITMS; CID; 3

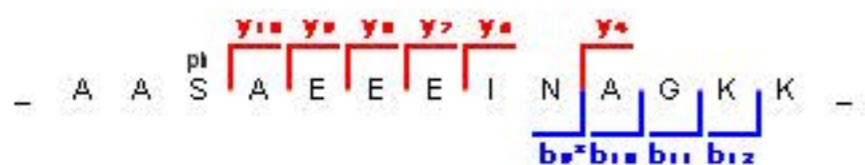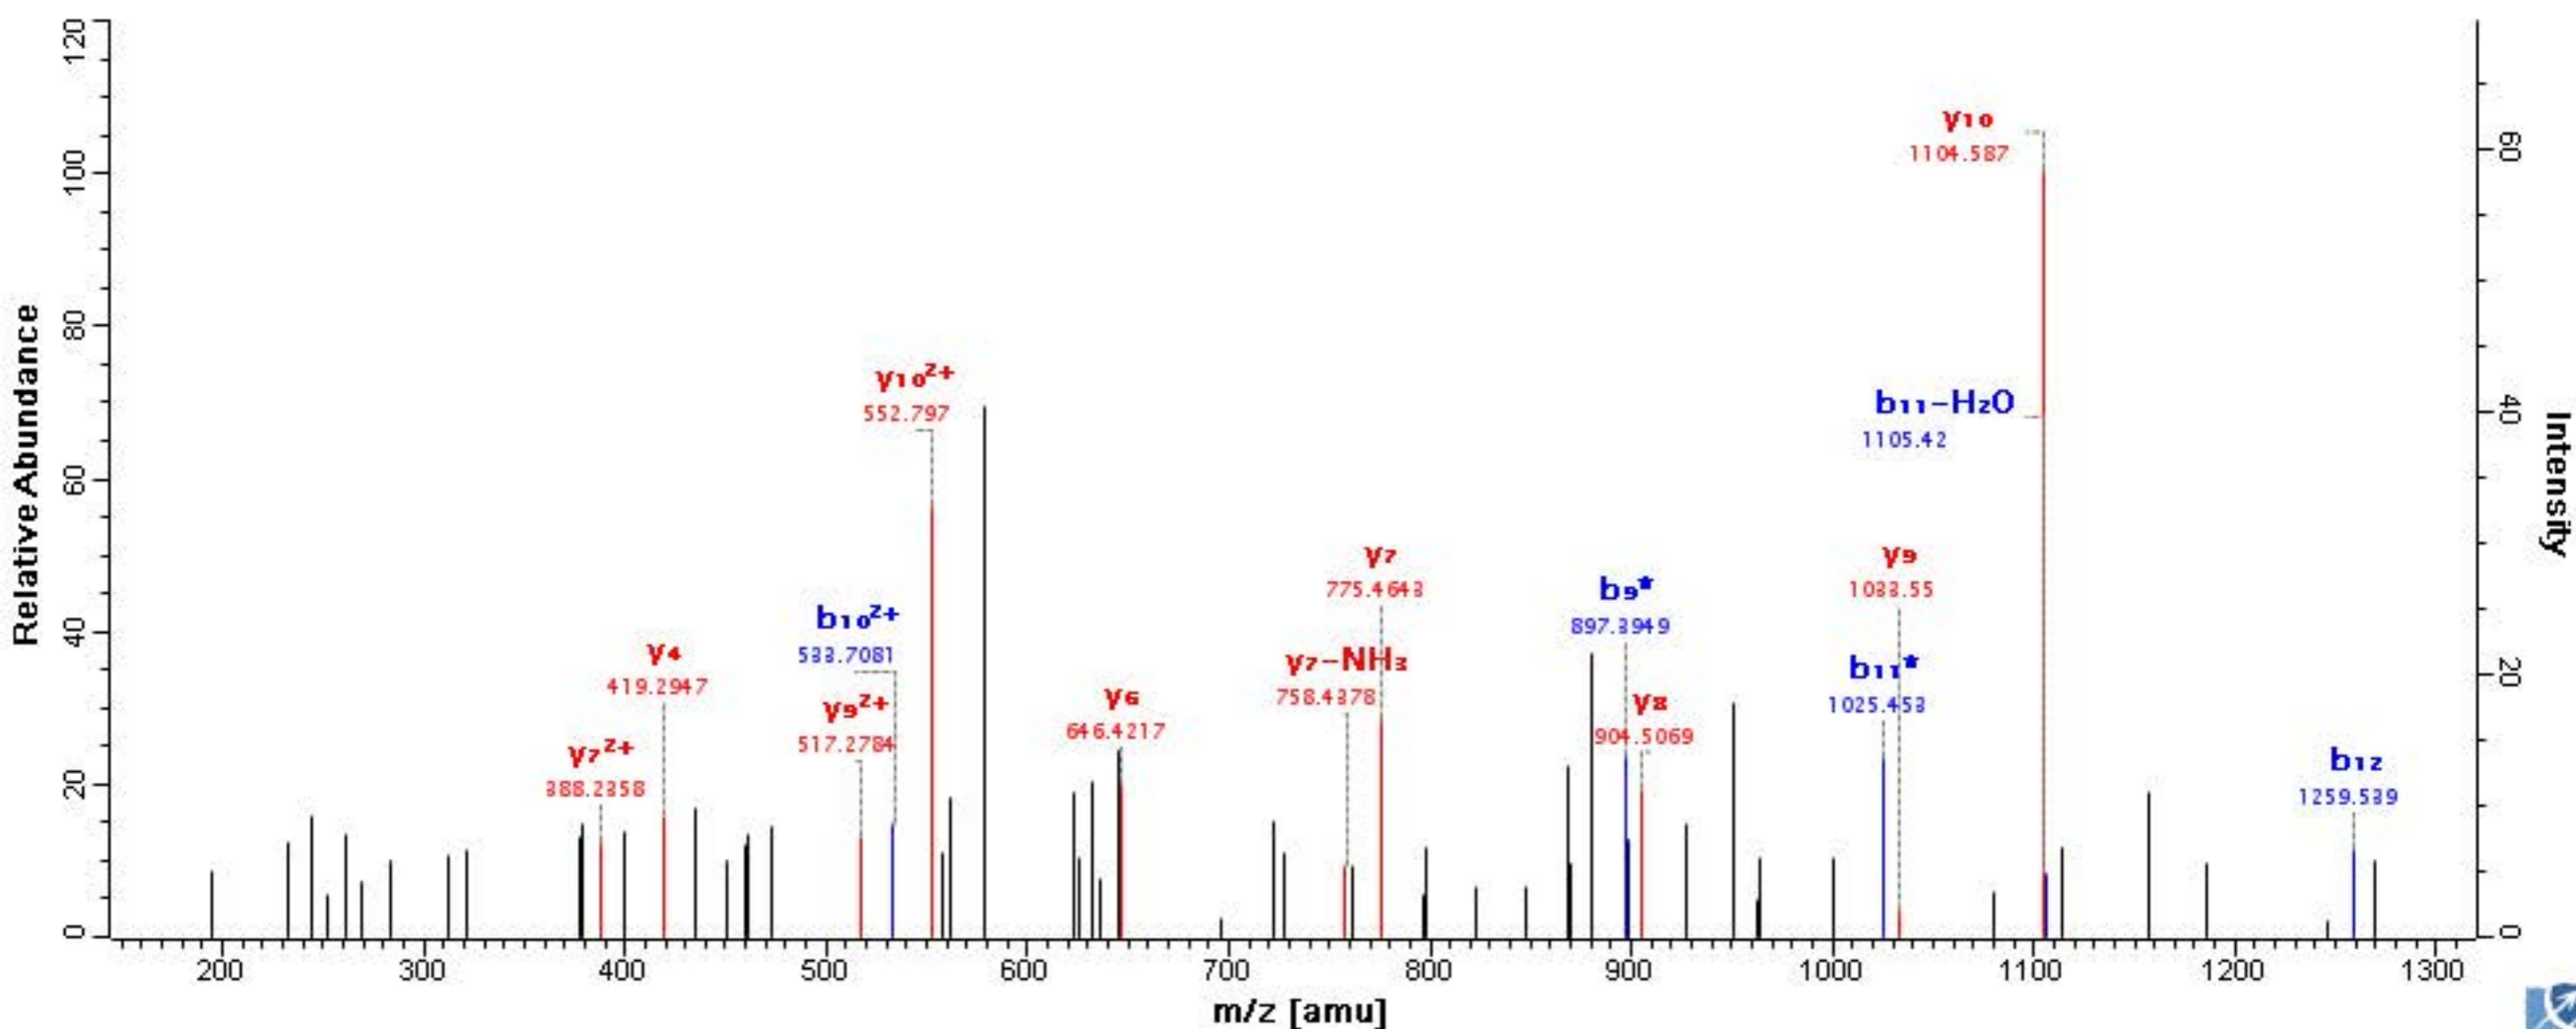

#### precursor information

|                   |                     |
|-------------------|---------------------|
| Mass:             | 1396.62431          |
| m/z:              | System.Collections. |
| Charge:           | System.Collections. |
| Retentiontime:    | System.Collections. |
| Score:            | 52.5002             |
| Mass Error [ppm]: | 0.54254             |
| PEP:              | 0.028761            |
| Precursor Type:   | MULTI               |

#### general information

|                       |             |
|-----------------------|-------------|
| Annotation:           | 9 of 13     |
| AminoAcids Coverag    | 69 %        |
| Intensity Coverage:   | 35 %        |
| Protein Localisation: | 174 ... 186 |

| b <sup>2+</sup> ion |          | b ion    |          |     | y ion |          | y <sup>2+</sup> ion |           |          |           |
|---------------------|----------|----------|----------|-----|-------|----------|---------------------|-----------|----------|-----------|
| Δ dalton            | mass     | Δ dalton | mass     | seq |       | Δ dalton | mass                | Δ dalton  | mass     |           |
|                     | 72.04439 |          | 72.04439 | 1   | A     | 12       |                     |           |          |           |
|                     | 143.0815 |          | 143.0815 | 2   | A     | 11       | 1342.622            |           | 1342.622 |           |
|                     | 310.0799 |          | 310.0799 | 3   | S     | 10       | 1271.585            |           | 1271.585 |           |
|                     | 381.117  |          | 381.117  | 4   | A     | 9        | 1104.587            | +0.171918 | 552.797  | +0.115097 |
|                     | 510.1596 |          | 510.1596 | 5   | E     | 8        | 1033.55             | -0.215529 | 517.2784 | -0.290907 |
|                     | 639.2022 |          | 639.2022 | 6   | E     | 7        | 904.5069            | +0.0839   | 904.5069 |           |
|                     | 768.2448 |          | 768.2448 | 7   | E     | 6        | 775.4643            | +0.208647 | 388.2358 | +0.119972 |
|                     | 881.3288 |          | 881.3288 | 8   | I     | 5        | 646.4217            | +0.367878 | 646.4217 |           |
|                     | 995.3717 |          | 995.3717 | 9   | N     | 4        | 533.3377            |           | 533.3377 |           |
| -0.157227           | 533.7081 |          | 1066.409 | 10  | A     | 3        | 419.2947            | +0.035275 | 419.2947 |           |
|                     | 1123.43  |          | 1123.43  | 11  | G     | 2        | 348.2576            |           | 348.2576 |           |
|                     | 1259.539 | -0.00433 | 1259.539 | 12  | K     | 1        | 291.2362            |           | 291.2362 |           |
|                     |          |          |          | 13  | K     | 0        | 155.127             |           | 155.127  |           |

Source: 20120530\_VR\_Bsu\_TripleSILAC\_pWTPPrkCPrpC\_F03  
 Scannumber: 4378  
 Protein: BSU23850; yqj; zwf  
 Peptide Score: 64.44  
 Method: ITMS; CID; 3

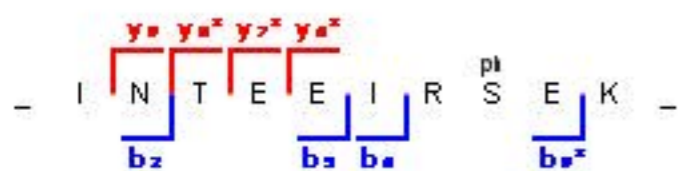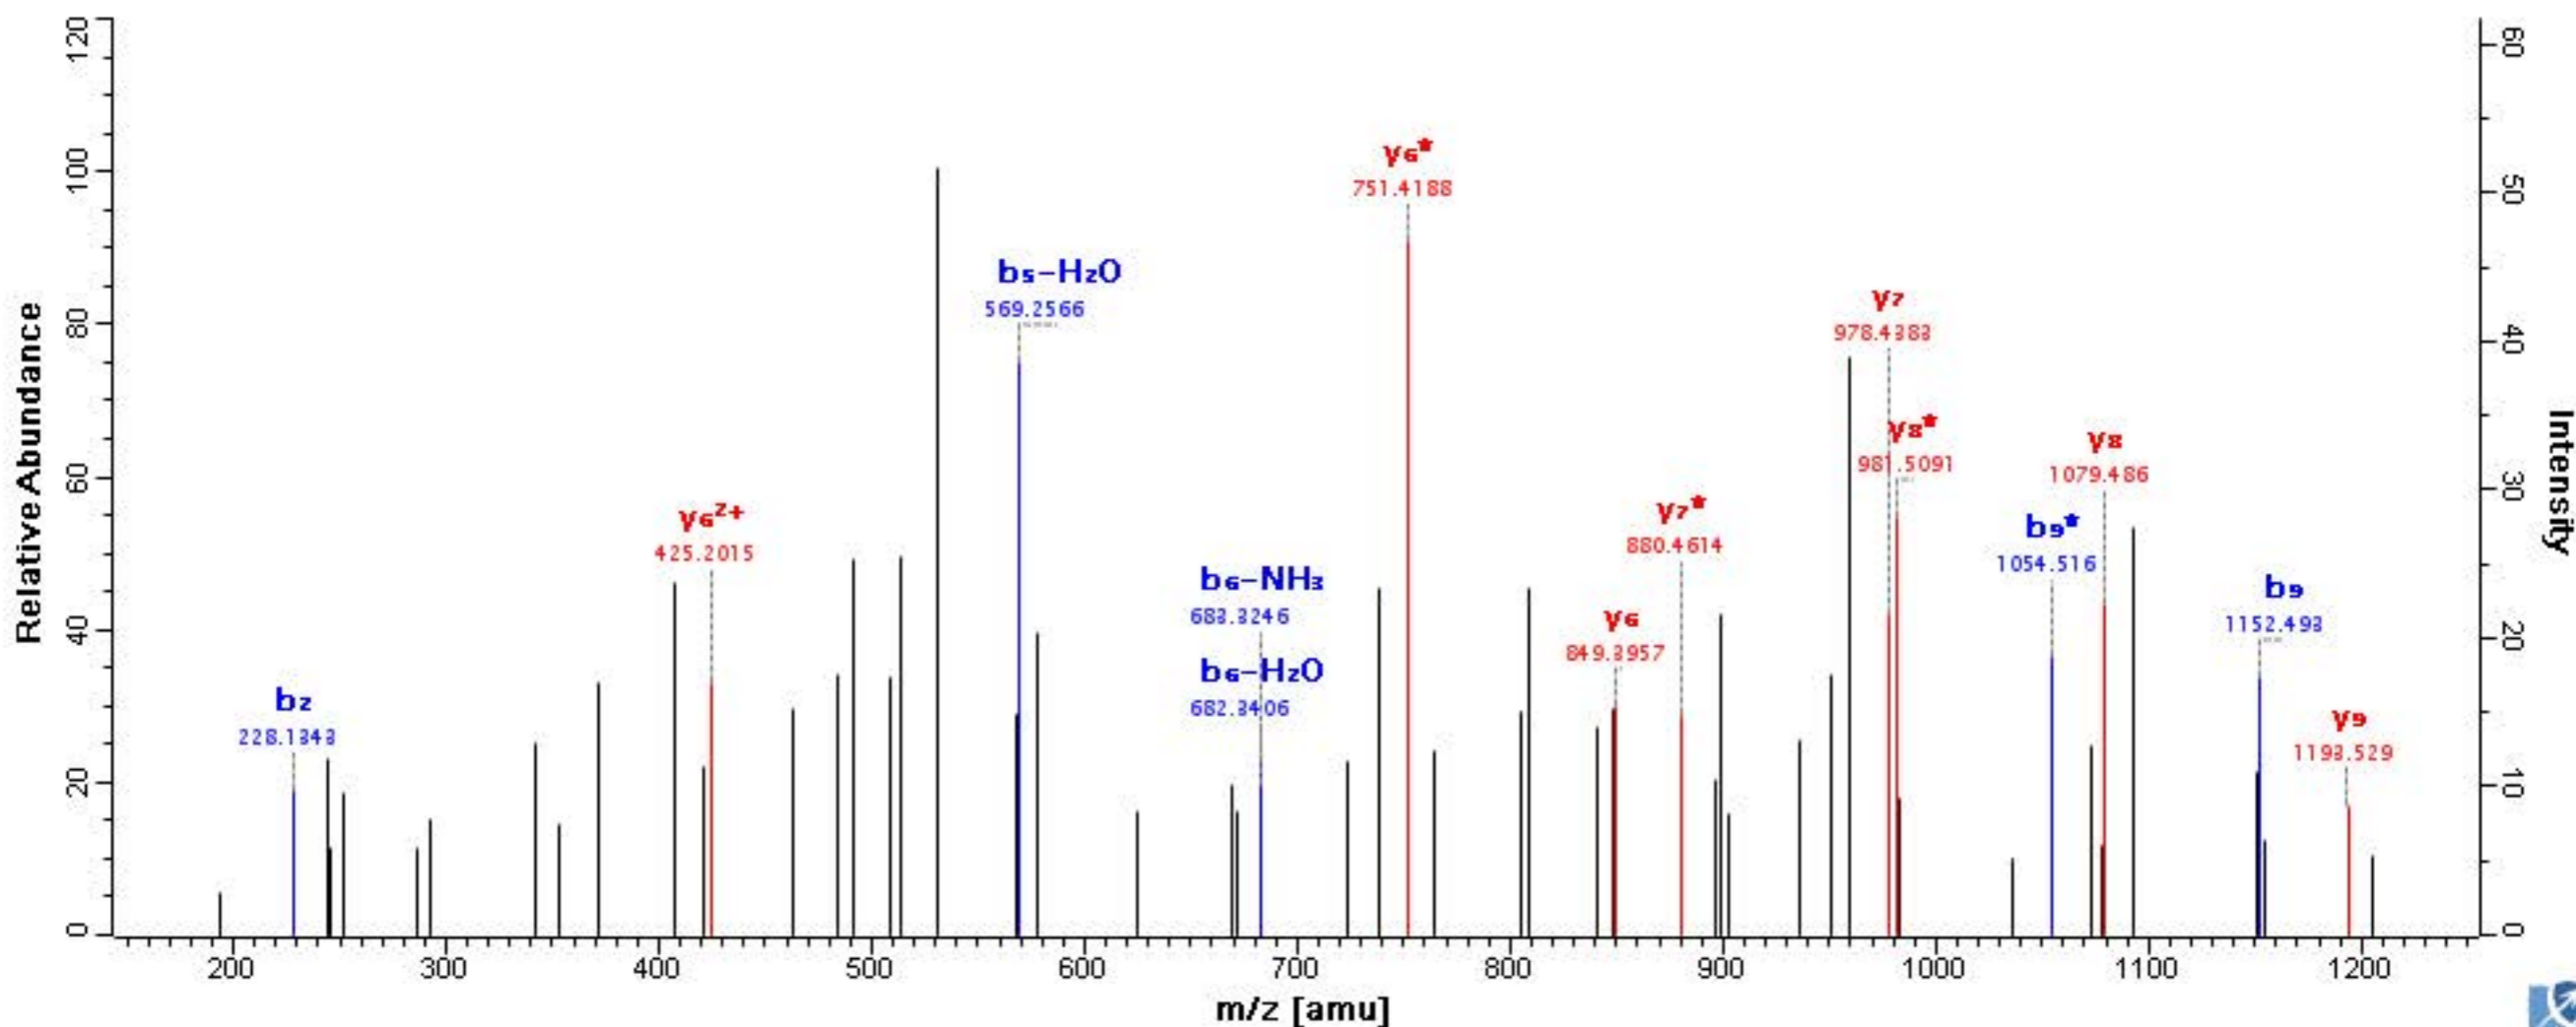

#### precursor information

|                   |                     |
|-------------------|---------------------|
| Mass:             | 1297.5925           |
| m/z:              | System.Collections. |
| Charge:           | System.Collections. |
| Retentiontime:    | System.Collections. |
| Score:            | 64.43861            |
| Mass Error [ppm]: | 0.7613              |
| PEP:              | 0.028807            |
| Precursor Type:   | MULTI               |

#### general information

|                       |             |
|-----------------------|-------------|
| Annotation:           | 6 of 10     |
| AminoAcids Coverage:  | 60 %        |
| Intensity Coverage:   | 31 %        |
| Protein Localisation: | 257 ... 266 |

| b ion      |              |    |     |   | y ion        |            | y <sup>2+</sup> ion |            |
|------------|--------------|----|-----|---|--------------|------------|---------------------|------------|
| Δ dalton   | mass         |    | seq |   | Δ dalton     | mass       | Δ dalton            | mass       |
|            | 114.09134045 | 1  | I   | 9 |              |            |                     |            |
| +0.0007419 | 228.13426789 | 2  | N   | 8 | 1193.528922  | +0.2396327 | 1193.528922         |            |
|            | 329.18194637 | 3  | T   | 7 | 1079.4859946 | +0.1241128 | 1079.4859946        |            |
|            | 458.22453946 | 4  | E   | 6 | 978.4383161  | -0.0142438 | 978.4383161         |            |
|            | 587.26713256 | 5  | E   | 5 | 849.395723   | +0.1708053 | 425.20149973        | -0.2518537 |
|            | 700.35119654 | 6  | I   | 4 | 720.35312991 |            | 720.35312991        |            |
|            | 856.45230757 | 7  | R   | 3 | 607.26906593 |            | 607.26906593        |            |
|            | 1023.4506664 | 8  | S   | 2 | 451.1679549  |            | 451.1679549         |            |
| -0.2704812 | 1152.4932595 | 9  | E   | 1 | 284.16959608 |            | 284.16959608        |            |
|            |              | 10 | K   | 0 | 155.12700298 |            | 155.12700298        |            |

Source: 20120530\_VR\_Bsu\_TripleSILAC\_pWTPPrkCPrpC\_F03  
 Scannumber: 4454  
 Protein: BSU14490; kinC; mskA; ssb  
 Peptide Score: 129.7  
 Method: ITMS; CID; 3

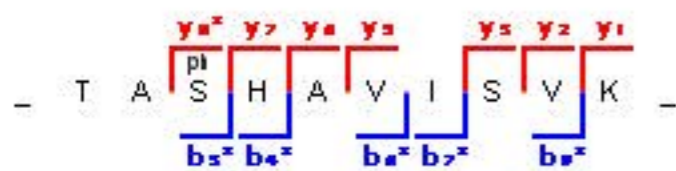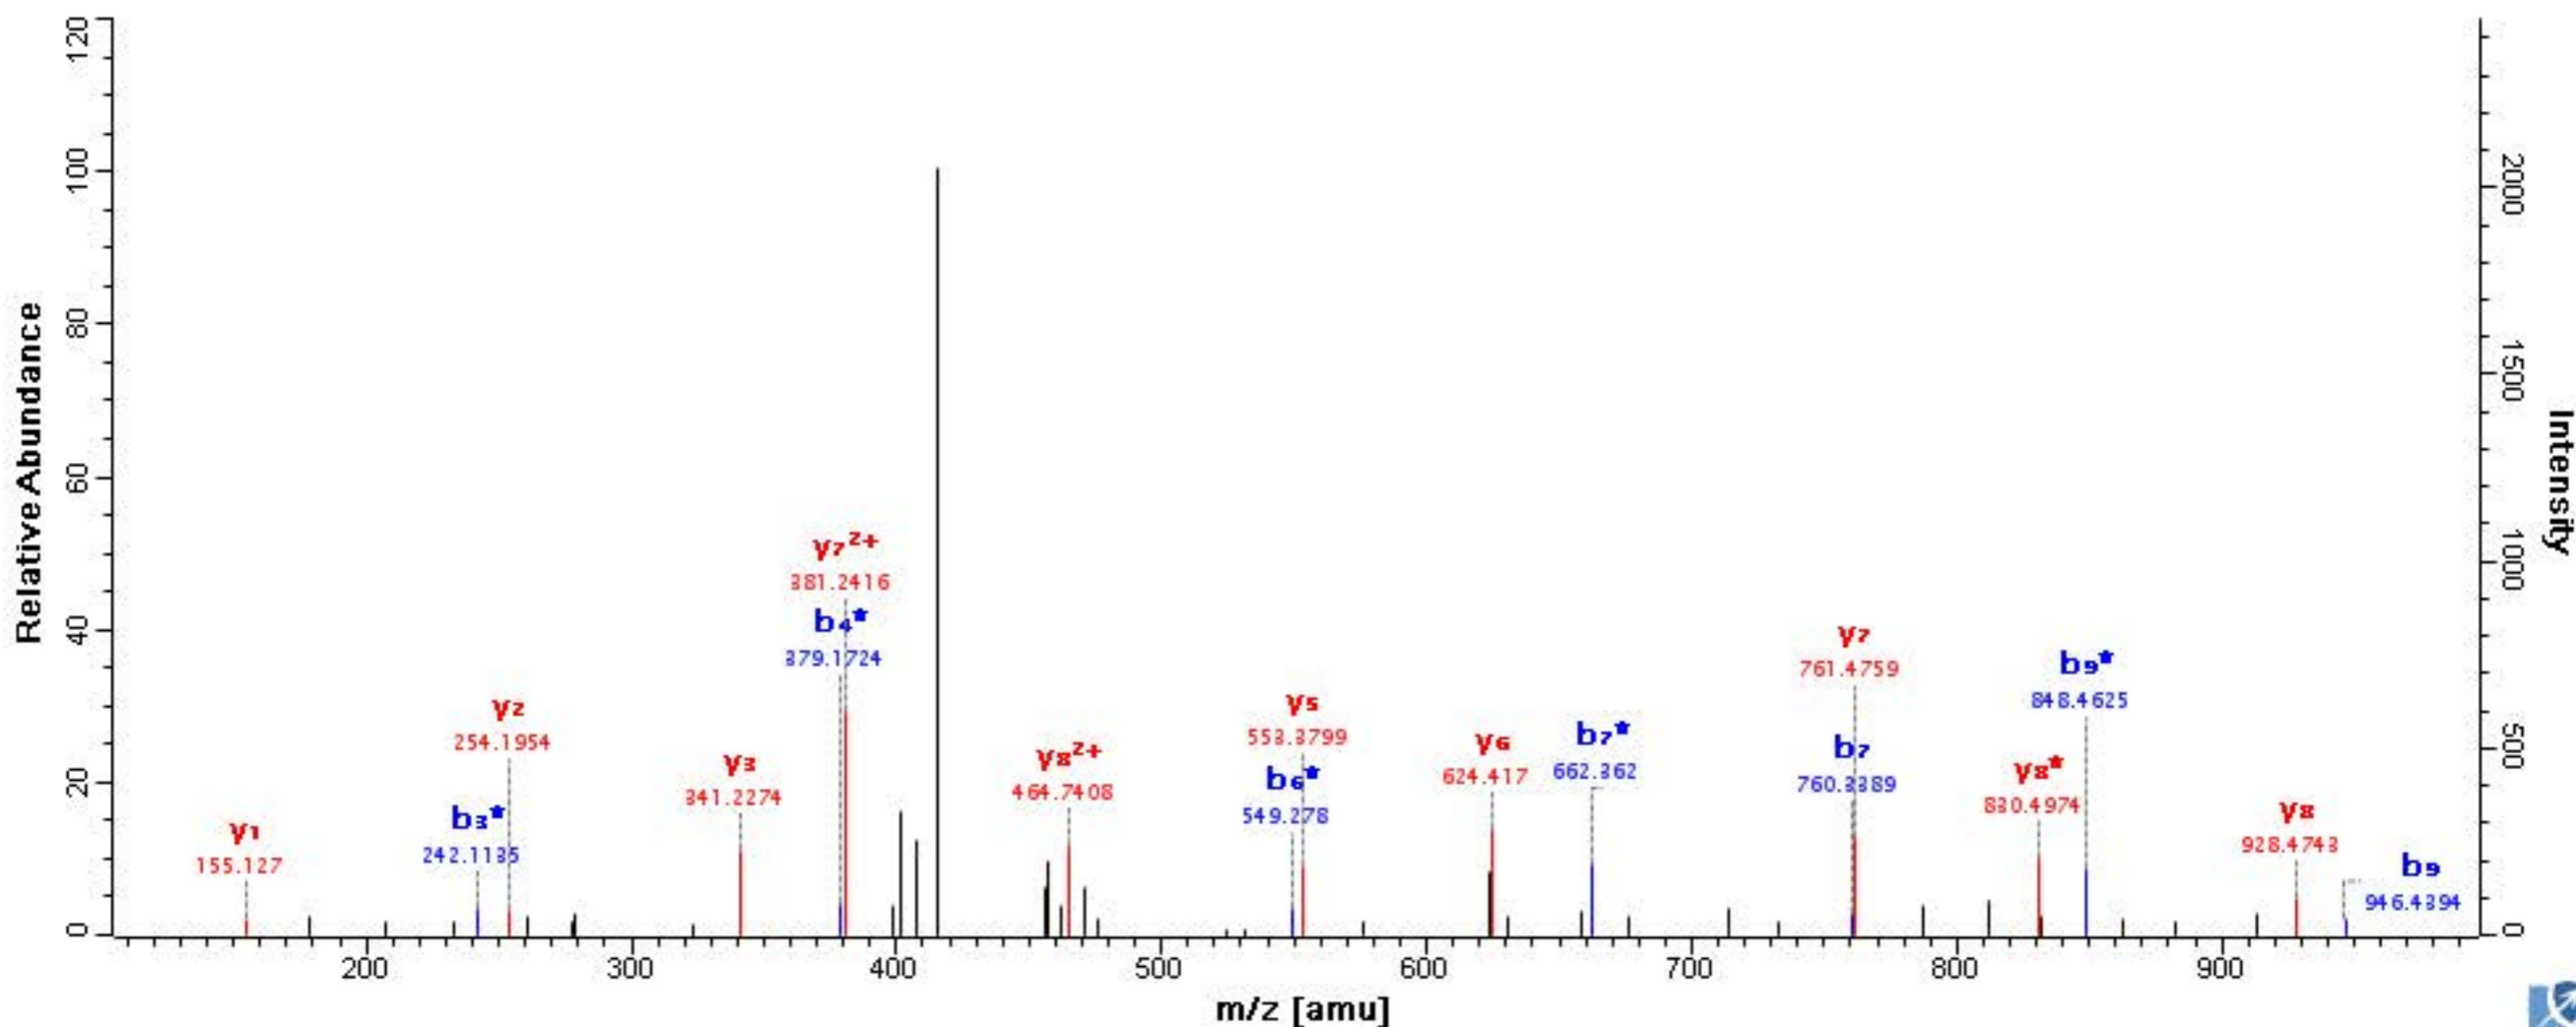

#### precursor information

|                   |                     |
|-------------------|---------------------|
| Mass:             | 1099.55179          |
| m/z:              | System.Collections. |
| Charge:           | System.Collections. |
| Retentiontime:    | System.Collections. |
| Score:            | 129.7024            |
| Mass Error [ppm]: | -0.026871           |
| PEP:              | 0.040016            |
| Precursor Type:   | ISO                 |

#### general information

|                       |             |
|-----------------------|-------------|
| Annotation:           | 9 of 10     |
| AminoAcids Coverage:  | 90 %        |
| Intensity Coverage:   | 39 %        |
| Protein Localisation: | 353 ... 362 |

| b ion      |              |    |     |   | y ion        |            | y <sup>2+</sup> ion |            |
|------------|--------------|----|-----|---|--------------|------------|---------------------|------------|
| Δ dalton   | mass         |    | seq |   | Δ dalton     | mass       | Δ dalton            | mass       |
|            | 102.05495494 | 1  | T   | 9 |              |            |                     |            |
|            | 173.09206873 | 2  | A   | 8 | 999.51142146 |            | 999.51142146        |            |
|            | 340.09042755 | 3  | S   | 7 | 928.47430768 | -0.0207554 | 464.74079207        | +0.1818764 |
|            | 477.14933941 | 4  | H   | 6 | 761.47594886 | +0.1318392 | 381.24161266        | +0.0031994 |
|            | 548.1864532  | 5  | A   | 5 | 624.41703699 | +0.0929728 | 624.41703699        |            |
|            | 647.25486711 | 6  | V   | 4 | 553.37992321 | +0.1225182 | 553.37992321        |            |
| +0.0983858 | 760.33893109 | 7  | I   | 3 | 454.31150929 |            | 454.31150929        |            |
|            | 847.3709595  | 8  | S   | 2 | 341.22744531 | +0.0367759 | 341.22744531        |            |
| +0.0848575 | 946.43937342 | 9  | V   | 1 | 254.1954169  | +0.0675683 | 254.1954169         |            |
|            |              | 10 | K   | 0 | 155.12700298 | +0.020046  | 155.12700298        |            |

Source: 20120530\_VR\_Bsu\_TripleSILAC\_pWTPPrkCPrpC\_F03  
 Scannumber: 4485  
 Protein: BSU04040; ycsE  
 Peptide Score: 94.62  
 Method: ITMS; CID; 3

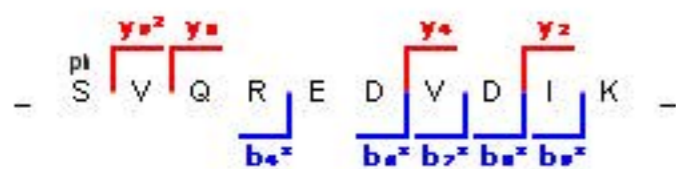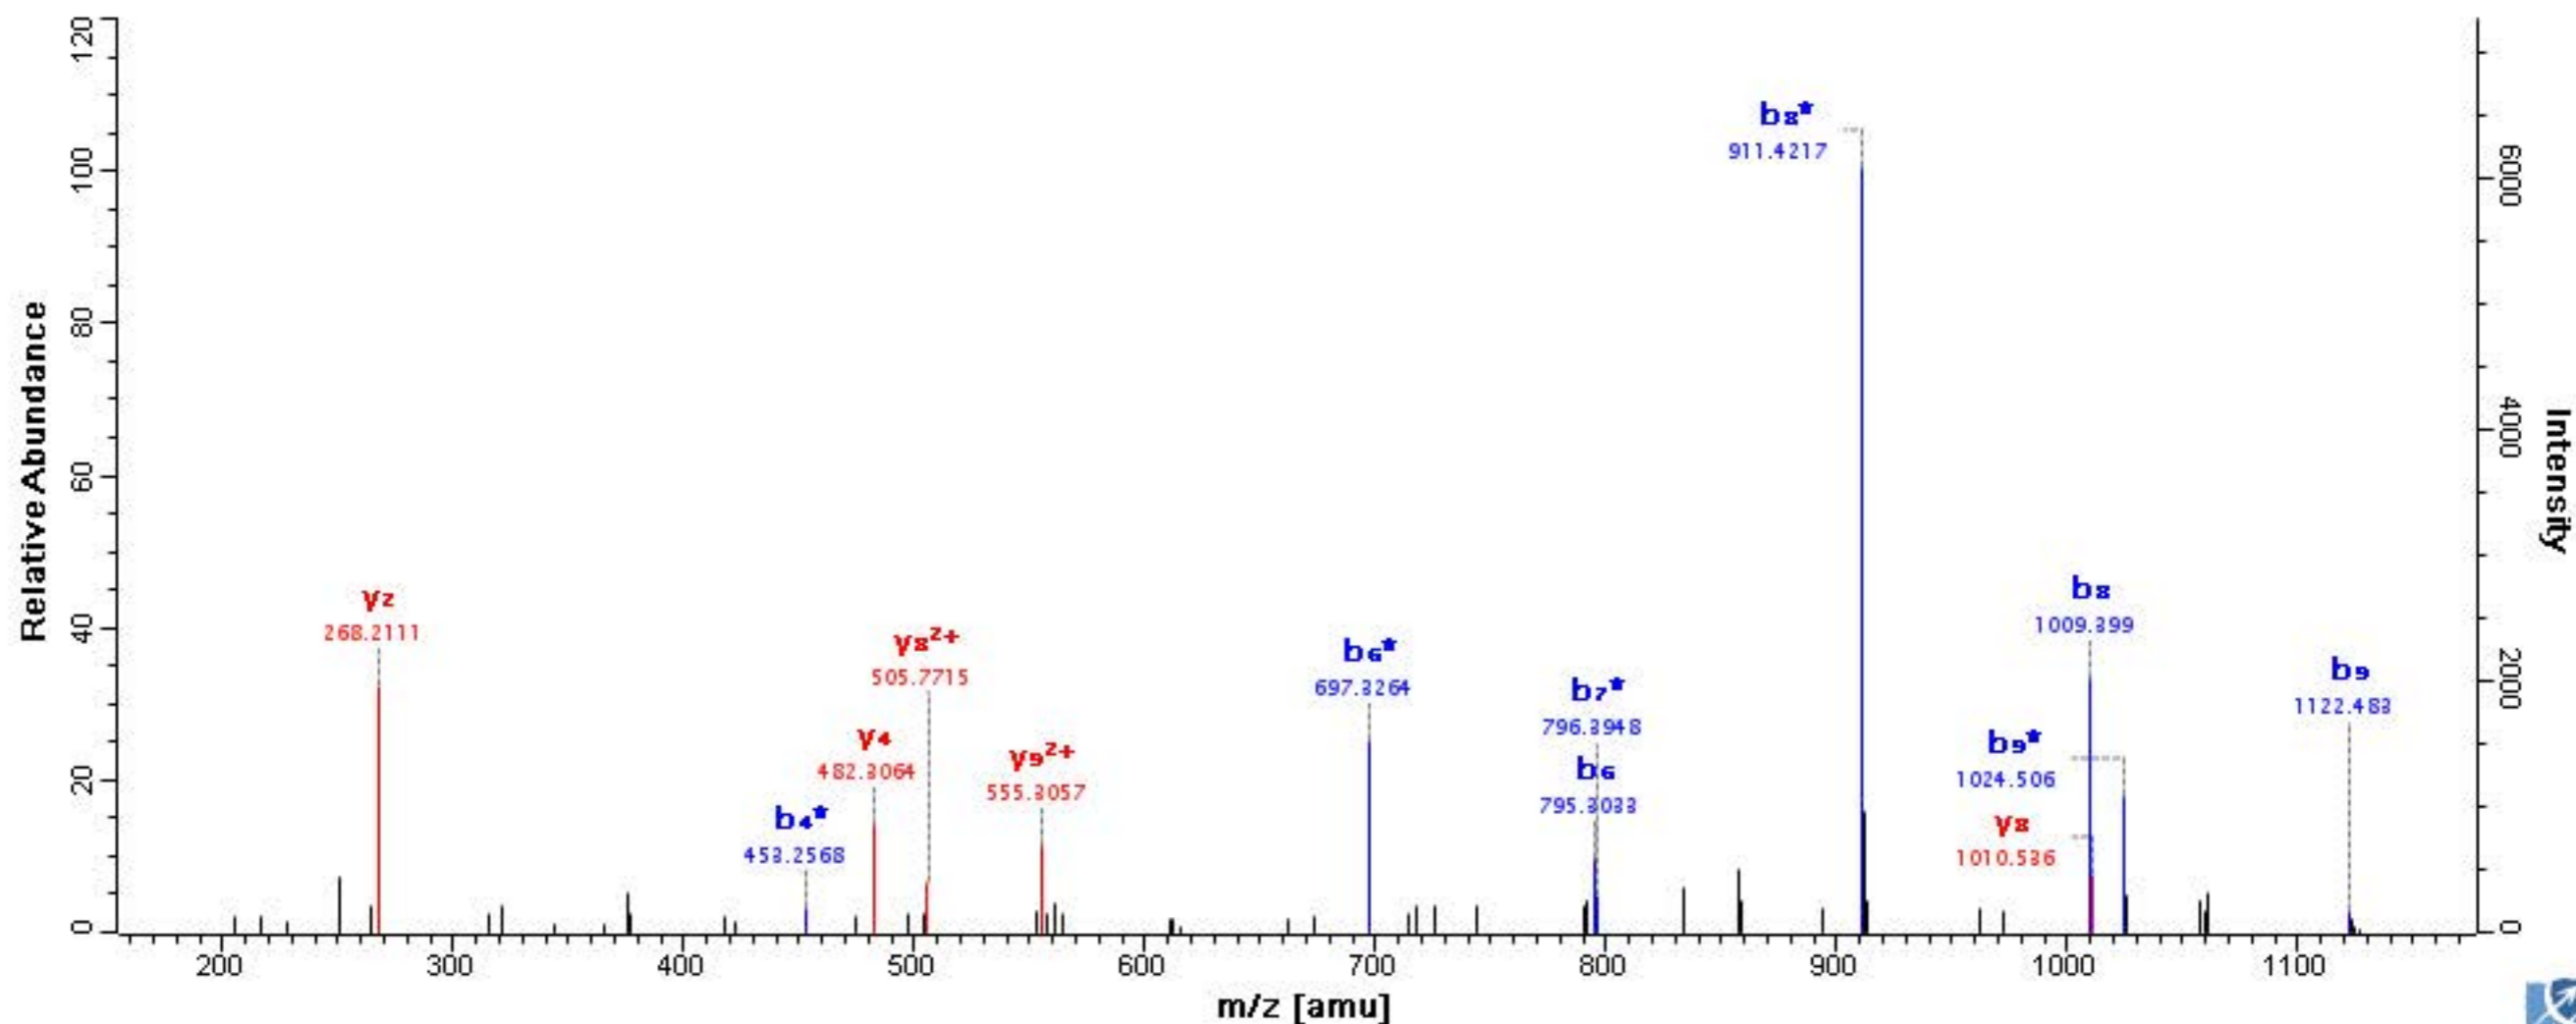

#### precursor information

|                   |                     |
|-------------------|---------------------|
| Mass:             | 1267.58041          |
| m/z:              | System.Collections. |
| Charge:           | System.Collections. |
| Retentiontime:    | System.Collections. |
| Score:            | 94.61616            |
| Mass Error [ppm]: | -0.4237             |
| PEP:              | 0.0038589           |
| Precursor Type:   | MULTI               |

#### general information

|                       |          |
|-----------------------|----------|
| Annotation:           | 7 of 10  |
| AminoAcids Coverage:  | 70 %     |
| Intensity Coverage:   | 64 %     |
| Protein Localisation: | 2 ... 11 |

| b ion      |              |    |     |   | y ion        |            | y <sup>2+</sup> ion |            |
|------------|--------------|----|-----|---|--------------|------------|---------------------|------------|
| Δ dalton   | mass         |    | seq |   | Δ dalton     | mass       | Δ dalton            | mass       |
|            | 168.00563528 | 1  | S   | 9 |              |            |                     |            |
|            | 267.0740492  | 2  | V   | 8 | 1109.6040625 |            | 555.30566948        | +0.0880683 |
|            | 395.13262671 | 3  | Q   | 7 | 1010.5356486 | -0.0788615 | 505.77146252        | -0.0862819 |
|            | 551.23373774 | 4  | R   | 6 | 882.47707107 |            | 882.47707107        |            |
|            | 680.27633084 | 5  | E   | 5 | 726.37596004 |            | 726.37596004        |            |
| -0.0201318 | 795.30327387 | 6  | D   | 4 | 597.33336694 |            | 597.33336694        |            |
|            | 894.37168778 | 7  | V   | 3 | 482.30642391 | +0.0964081 | 482.30642391        |            |
| -0.0358989 | 1009.3986308 | 8  | D   | 2 | 383.23801    |            | 383.23801           |            |
| -0.0783979 | 1122.4826948 | 9  | I   | 1 | 268.21106696 | -0.0944898 | 268.21106696        |            |
|            |              | 10 | K   | 0 | 155.12700298 |            | 155.12700298        |            |

Source: 20120530\_VR\_Bsu\_TripleSILAC\_pWTPPrkCPrpC\_F03  
 Scannumber: 4580  
 Protein: BSU13890; crr; ptsG; ptsX  
 Peptide Score: 106.42  
 Method: ITMS; CID; 3

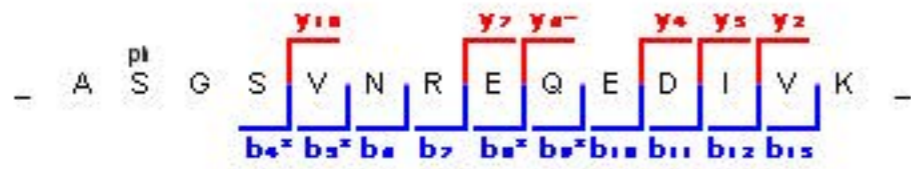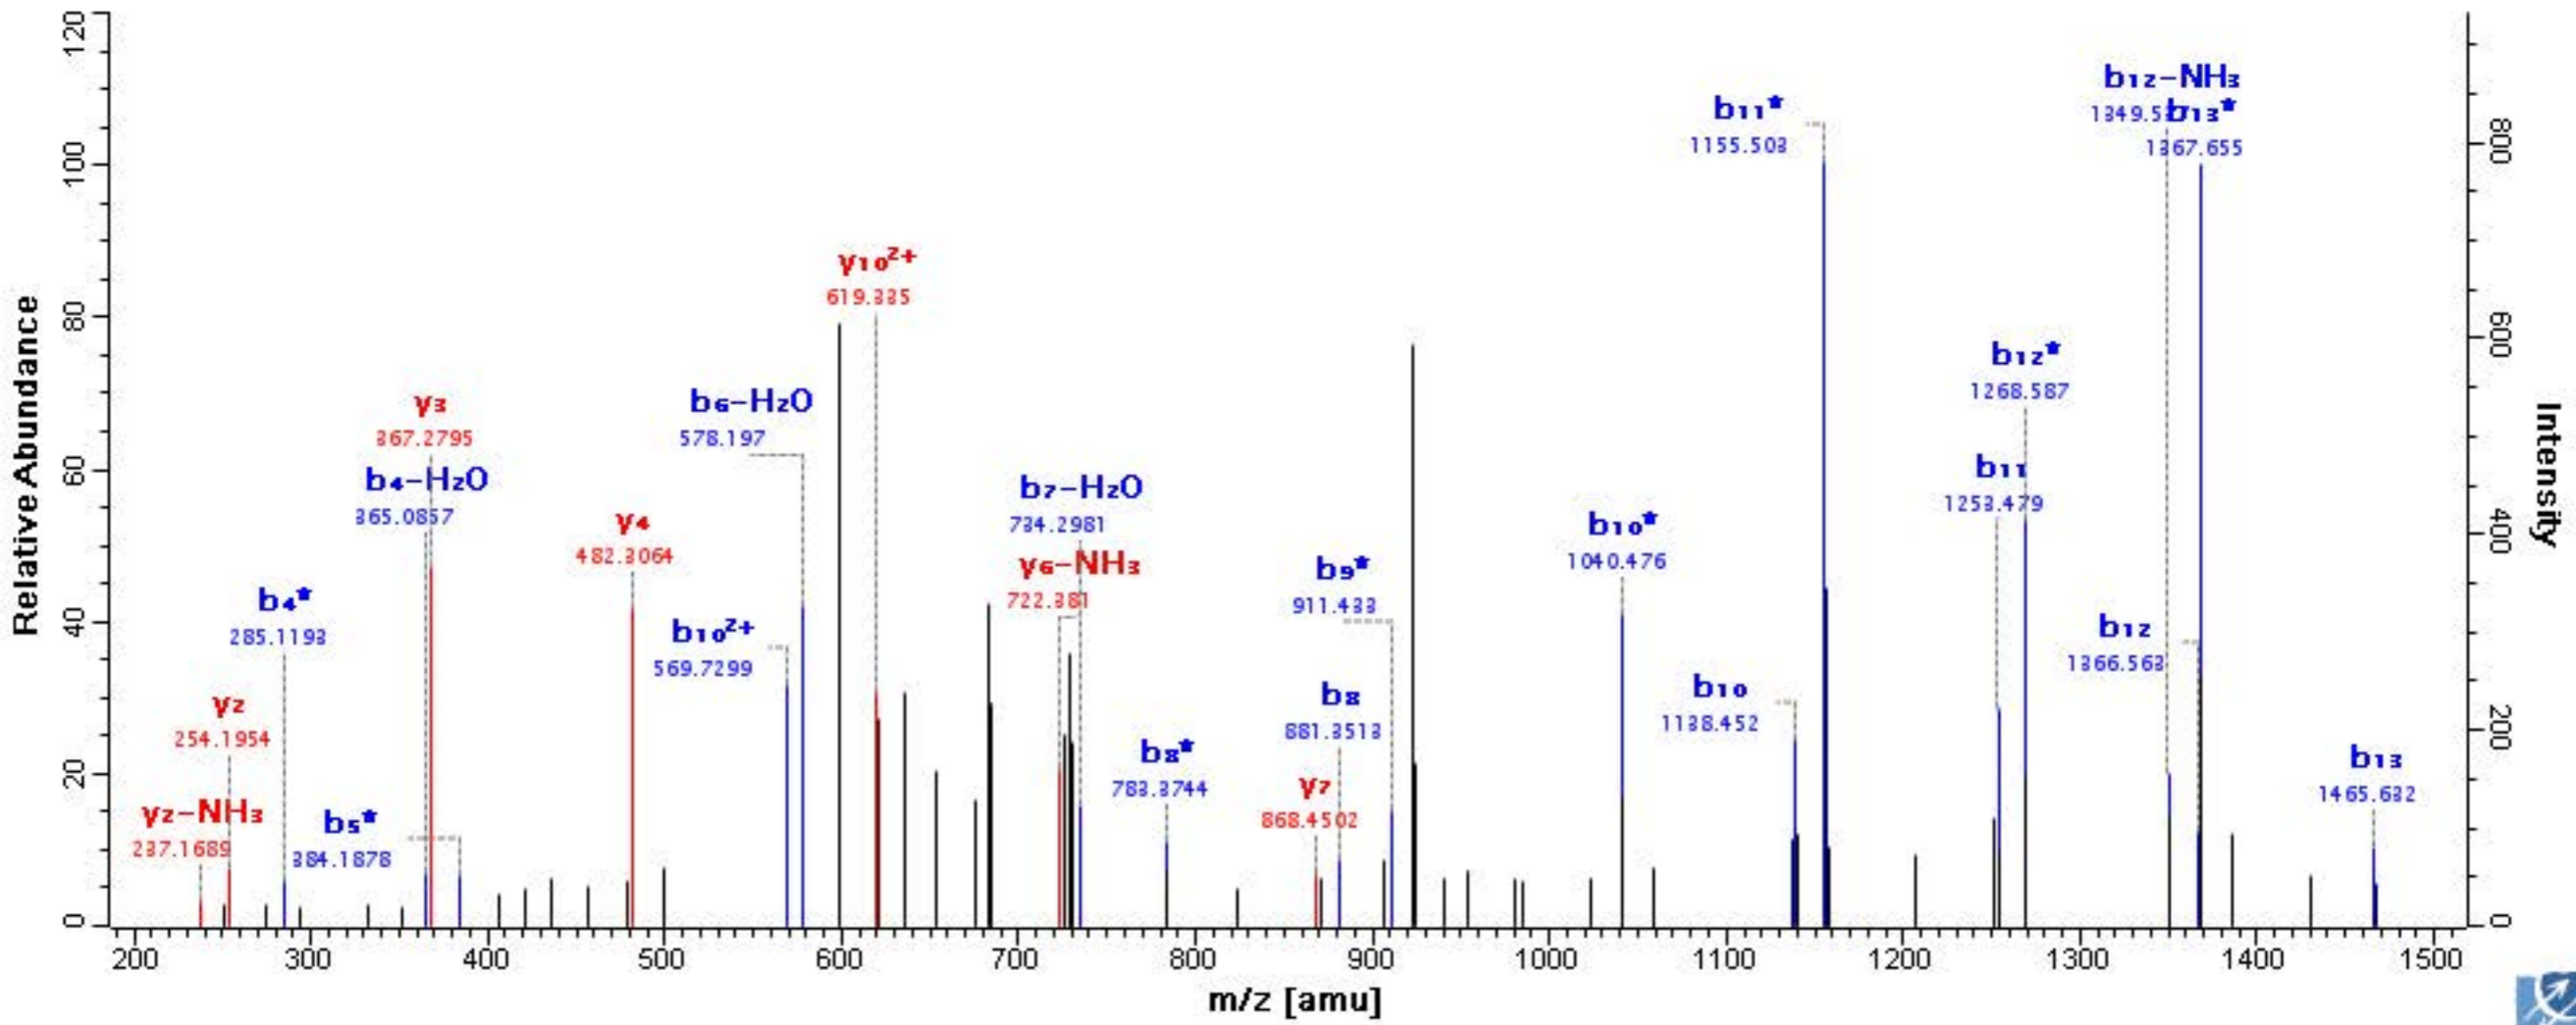

#### precursor information

|                   |                     |
|-------------------|---------------------|
| Mass:             | 1610.73007          |
| m/z:              | System.Collections. |
| Charge:           | System.Collections. |
| Retentiontime:    | System.Collections. |
| Score:            | 106.4236            |
| Mass Error [ppm]: | -0.038029           |
| PEP:              | 1.6306E-06          |
| Precursor Type:   | MULTI               |

| b <sup>2+</sup> ion |          | b ion     |          |    |     |    | y ion    |           | y <sup>2+</sup> ion |           |
|---------------------|----------|-----------|----------|----|-----|----|----------|-----------|---------------------|-----------|
| Δ dalton            | mass     | Δ dalton  | mass     |    | seq |    | Δ dalton | mass      | Δ dalton            | mass      |
|                     | 72.04439 |           | 72.04439 | 1  | A   | 13 |          |           |                     |           |
|                     | 239.0427 |           | 239.0427 | 2  | S   | 12 | 1548.714 |           | 1548.714            |           |
|                     | 296.0642 |           | 296.0642 | 3  | G   | 11 | 1381.716 |           | 1381.716            |           |
|                     | 383.0962 |           | 383.0962 | 4  | S   | 10 | 1324.695 |           | 1324.695            |           |
|                     | 482.1647 |           | 482.1647 | 5  | V   | 9  | 1237.663 |           | 619.335             | -0.017514 |
|                     | 596.2076 |           | 596.2076 | 6  | N   | 8  | 1138.594 |           | 1138.594            |           |
|                     | 752.3087 |           | 752.3087 | 7  | R   | 7  | 1024.551 |           | 1024.551            |           |
|                     | 881.3513 | -0.009795 | 881.3513 | 8  | E   | 6  | 868.4502 | +0.101082 | 868.4502            |           |
|                     | 1009.41  |           | 1009.41  | 9  | Q   | 5  | 739.4076 |           | 739.4076            |           |
| -0.247628           | 569.7299 | +0.063656 | 1138.452 | 10 | E   | 4  | 611.349  |           | 611.349             |           |
|                     | 1253.479 | +0.176483 | 1253.479 | 11 | D   | 3  | 482.3064 | +0.110751 | 482.3064            |           |
|                     | 1366.563 | -0.104602 | 1366.563 | 12 | I   | 2  | 367.2795 | +0.050109 | 367.2795            |           |
|                     | 1465.632 | +0.065509 | 1465.632 | 13 | V   | 1  | 254.1954 | +0.012789 | 254.1954            |           |
|                     |          |           |          | 14 | K   | 0  | 155.127  |           | 155.127             |           |

#### general information

|                       |             |
|-----------------------|-------------|
| Annotation:           | 10 of 14    |
| AminoAcids Coverage:  | 71 %        |
| Intensity Coverage:   | 47 %        |
| Protein Localisation: | 683 ... 696 |



Source: 20120530\_VR\_Bsu\_TripleSILAC\_pWTPPrkCPrpC\_F03  
 Scannumber: 4718  
 Protein: BSU33940; gap; gapA  
 Peptide Score: 81.71  
 Method: ITMS; CID; 3

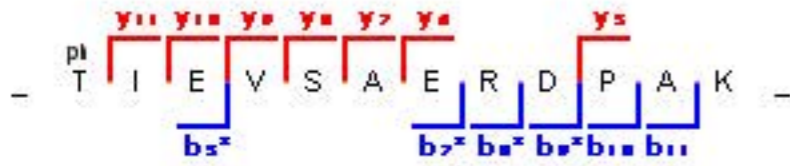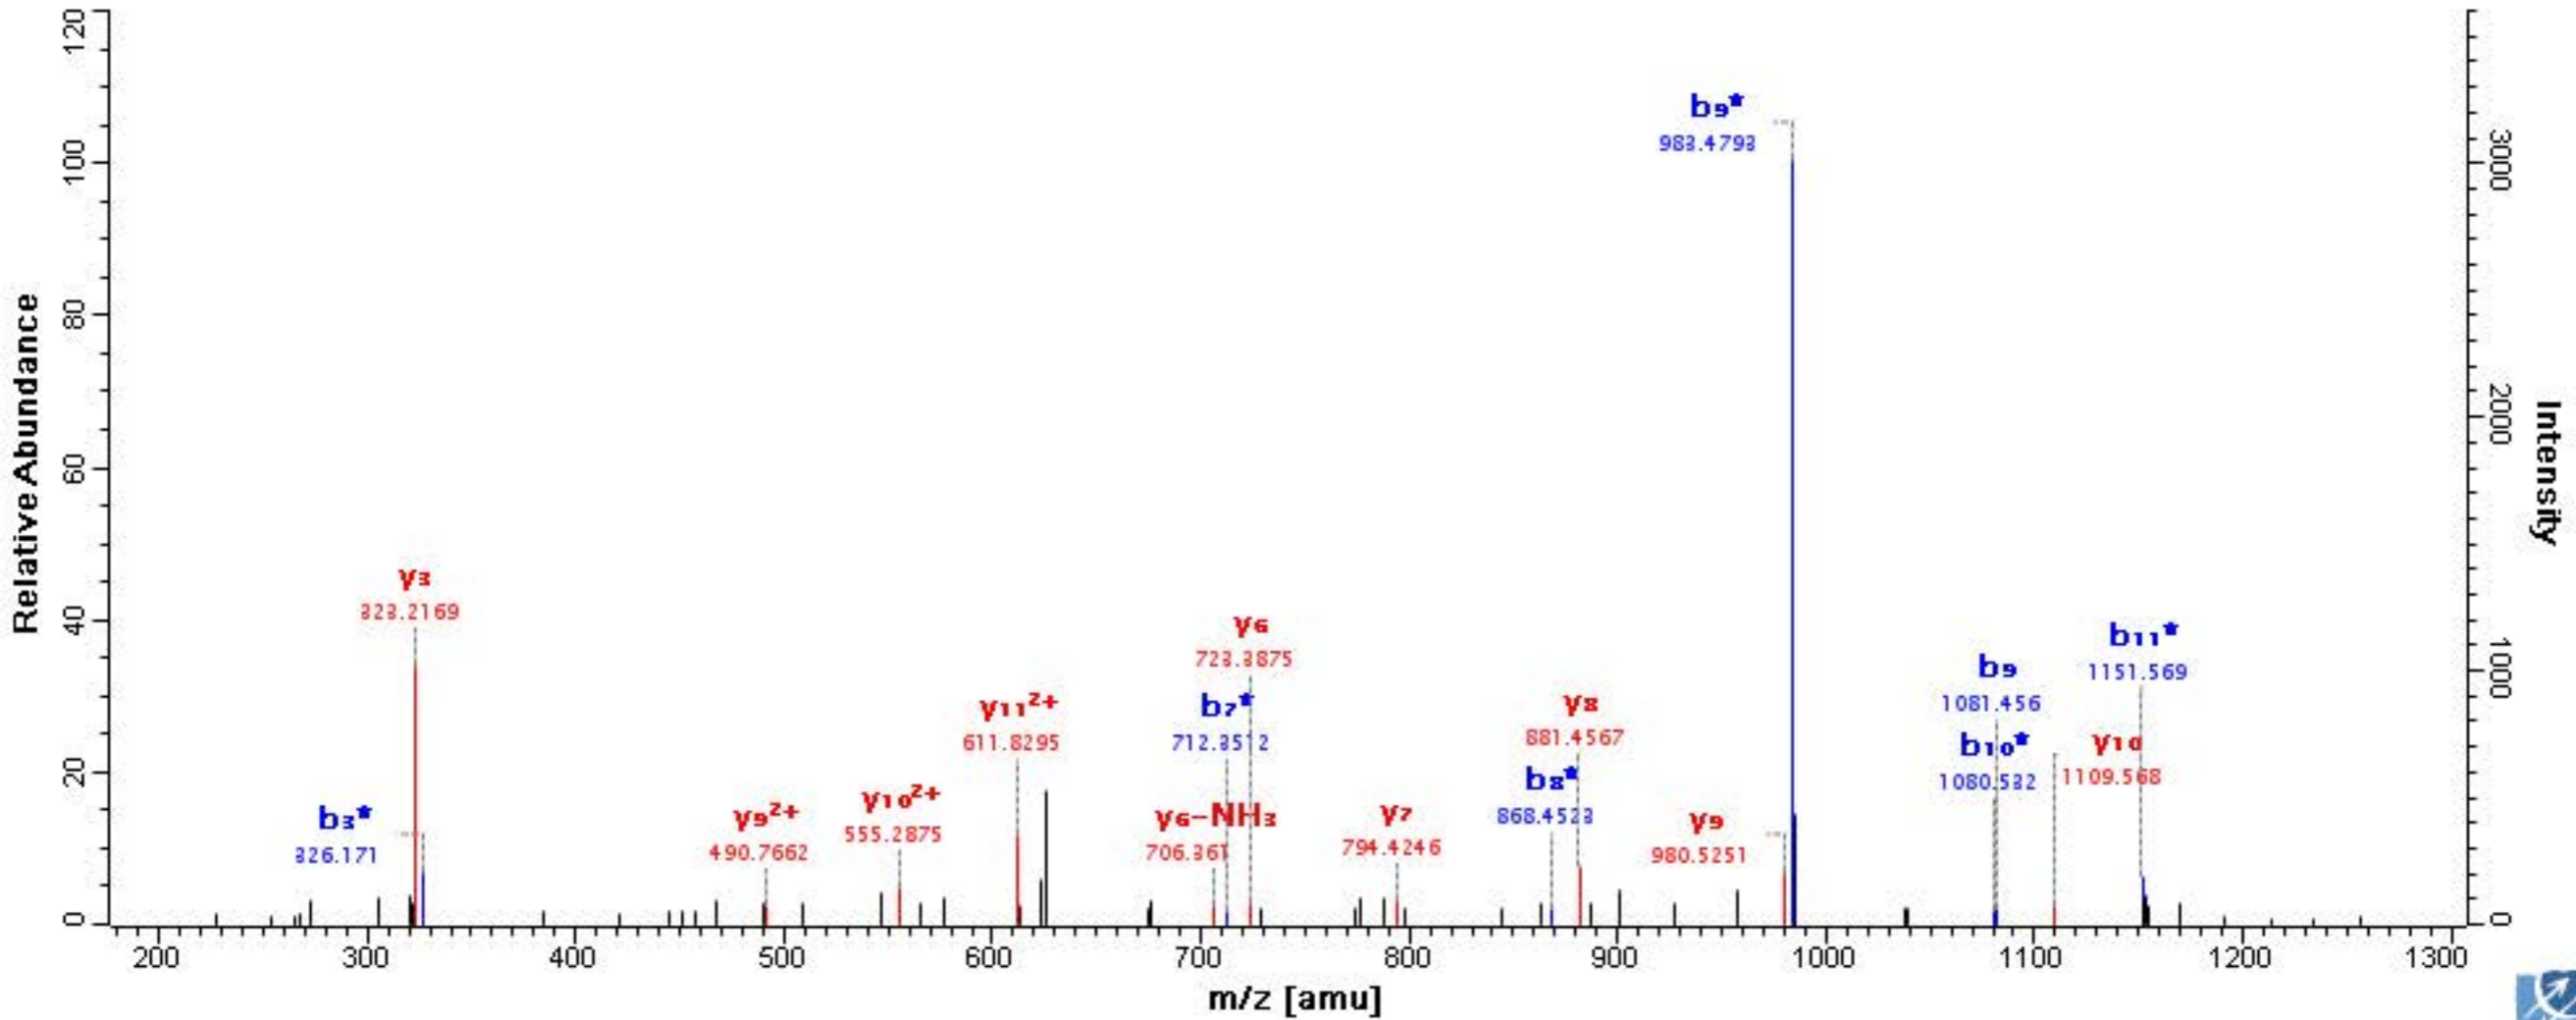

#### precursor information

|                   |                     |
|-------------------|---------------------|
| Mass:             | 1394.64228          |
| m/z:              | System.Collections. |
| Charge:           | System.Collections. |
| Retentiontime:    | System.Collections. |
| Score:            | 81.70898            |
| Mass Error [ppm]: | -1.4249             |
| PEP:              | 0.0032482           |
| Precursor Type:   | MULTI               |

#### general information

|                       |           |
|-----------------------|-----------|
| Annotation:           | 10 of 12  |
| AminoAcids Coverag    | 83 %      |
| Intensity Coverage:   | 58 %      |
| Protein Localisation: | 71 ... 82 |

| b ion      |              |    |     |    | γ ion        |            | γ <sup>2+</sup> ion |            |
|------------|--------------|----|-----|----|--------------|------------|---------------------|------------|
| Δ dalton   | mass         |    | seq |    | Δ dalton     | mass       | Δ dalton            | mass       |
|            | 182.02128535 | 1  | T   | 11 |              |            |                     |            |
|            | 295.10534933 | 2  | I   | 10 | 1222.651741  |            | 611.82950872        | -0.0252485 |
|            | 424.14794243 | 3  | E   | 9  | 1109.567677  | +0.0811267 | 555.28747673        | +0.1674183 |
|            | 523.21635634 | 4  | V   | 8  | 980.52508389 | +0.1453263 | 490.76618018        | +0.4070986 |
|            | 610.24838475 | 5  | S   | 7  | 881.45666998 | +0.0533398 | 881.45666998        |            |
|            | 681.28549854 | 6  | A   | 6  | 794.42464157 | -0.0007524 | 794.42464157        |            |
|            | 810.32809164 | 7  | E   | 5  | 723.38752778 | -0.0410922 | 723.38752778        |            |
|            | 966.42920266 | 8  | R   | 4  | 594.34493468 |            | 594.34493468        |            |
| +0.1011053 | 1081.4561457 | 9  | D   | 3  | 438.24382366 |            | 438.24382366        |            |
|            | 1178.5089095 | 10 | P   | 2  | 323.21688062 | +0.1075823 | 323.21688062        |            |
|            | 1249.5460233 | 11 | A   | 1  | 226.16411677 |            | 226.16411677        |            |
|            |              | 12 | K   | 0  | 155.12700298 |            | 155.12700298        |            |

Source: 201 20530\_VR\_Bsu\_TripleSILAC\_pWTPPrkCPrpC\_F03  
 Scannumber: 5056  
 Protein: BSU35730; gtaA; rodD; tagE  
 Peptide Score: 122.51  
 Method: ITMS; CID; 3

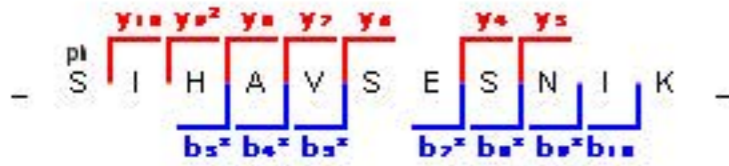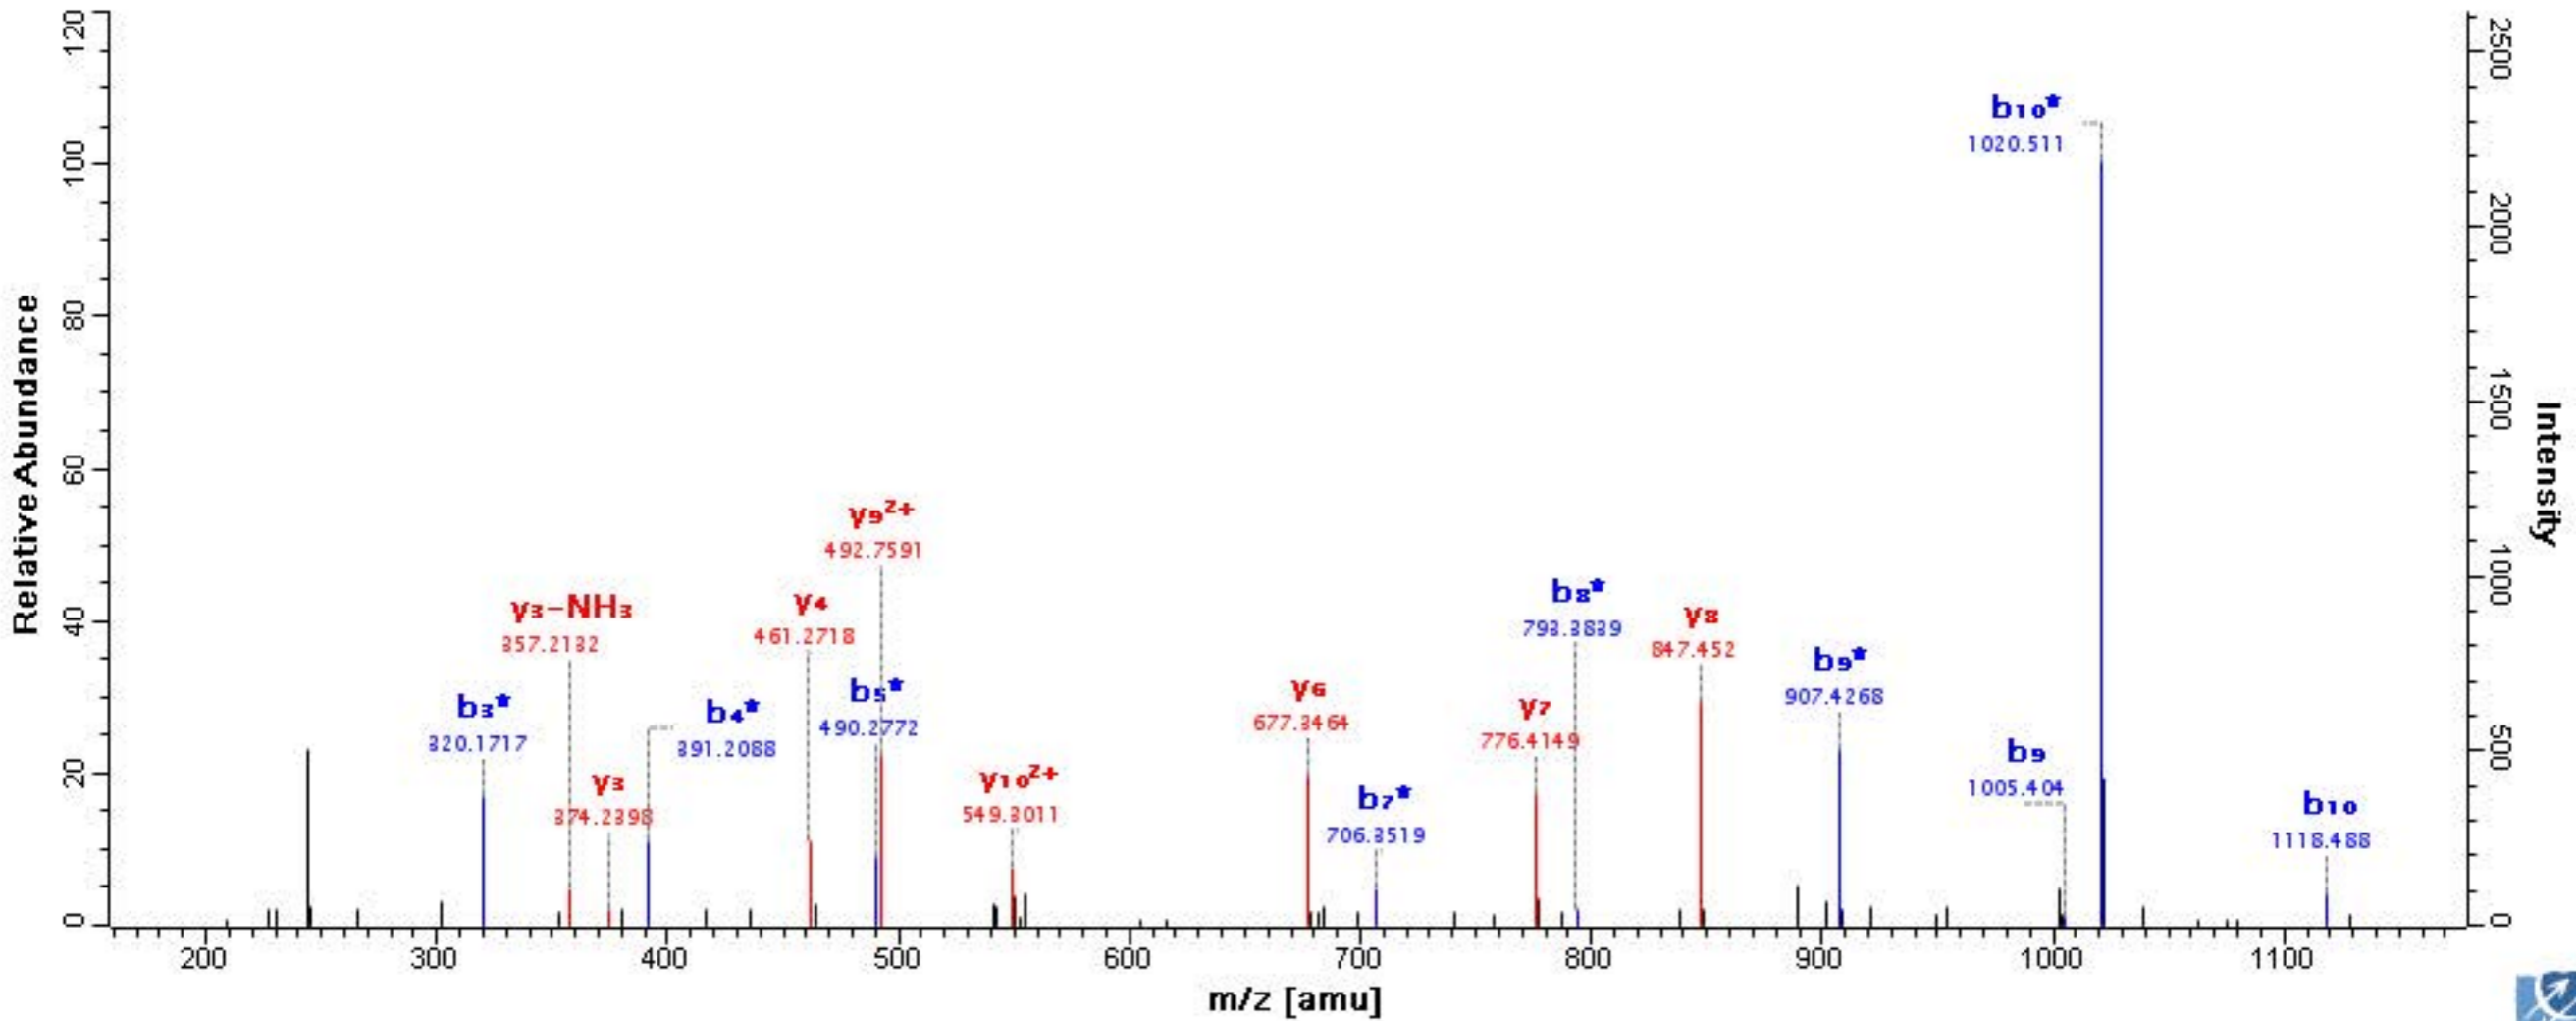

#### precursor information

|                   |                     |
|-------------------|---------------------|
| Mass:             | 1263.5857           |
| m/z:              | System.Collections. |
| Charge:           | System.Collections. |
| Retentiontime:    | System.Collections. |
| Score:            | 122.5105            |
| Mass Error [ppm]: | -0.25832            |
| PEP:              | 6.213E-07           |
| Precursor Type:   | MULTI               |

#### general information

|                       |          |
|-----------------------|----------|
| Annotation:           | 9 of 11  |
| AminoAcids Coverag    | 82 %     |
| Intensity Coverage:   | 69 %     |
| Protein Localisation: | 2 ... 12 |

| b ion           |              |    |     |    | y ion           |            | y <sup>2+</sup> ion |            |
|-----------------|--------------|----|-----|----|-----------------|------------|---------------------|------------|
| $\Delta$ dalton | mass         |    | seq |    | $\Delta$ dalton | mass       | $\Delta$ dalton     | mass       |
|                 | 168.00563528 | 1  | S   | 10 |                 |            |                     |            |
|                 | 281.08969927 | 2  | I   | 9  | 1097.5949491    |            | 549.30111276        | +0.1961407 |
|                 | 418.14861113 | 3  | H   | 8  | 984.51088508    |            | 492.75908077        | +0.1133557 |
|                 | 489.18572492 | 4  | A   | 7  | 847.45197322    | +0.0180585 | 847.45197322        |            |
|                 | 588.25413883 | 5  | V   | 6  | 776.41485943    | -0.0448033 | 776.41485943        |            |
|                 | 675.28616724 | 6  | S   | 5  | 677.34644551    | +0.0628562 | 677.34644551        |            |
|                 | 804.32876034 | 7  | E   | 4  | 590.3144171     |            | 590.3144171         |            |
|                 | 891.36078875 | 8  | S   | 3  | 461.27182401    | +0.2306784 | 461.27182401        |            |
| -0.4686576      | 1005.4037162 | 9  | N   | 2  | 374.2397956     | -0.1842536 | 374.2397956         |            |
| -0.018664       | 1118.4877802 | 10 | I   | 1  | 260.19686815    |            | 260.19686815        |            |
|                 |              | 11 | K   | 0  | 147.11280417    |            | 147.11280417        |            |

Source: 201 20530\_VR\_Bsu\_TripleSILAC\_pWTPPrkCPrpC\_F03  
 Scannumber: 5378  
 Protein: BSU35360; hag  
 Peptide Score: 94.01  
 Method: ITMS; CID; 3

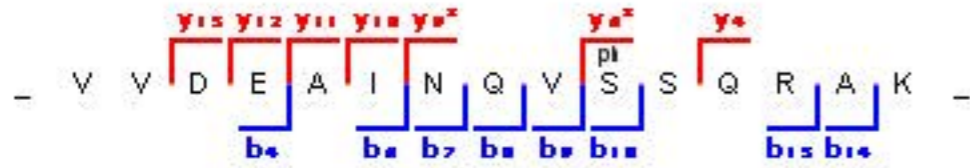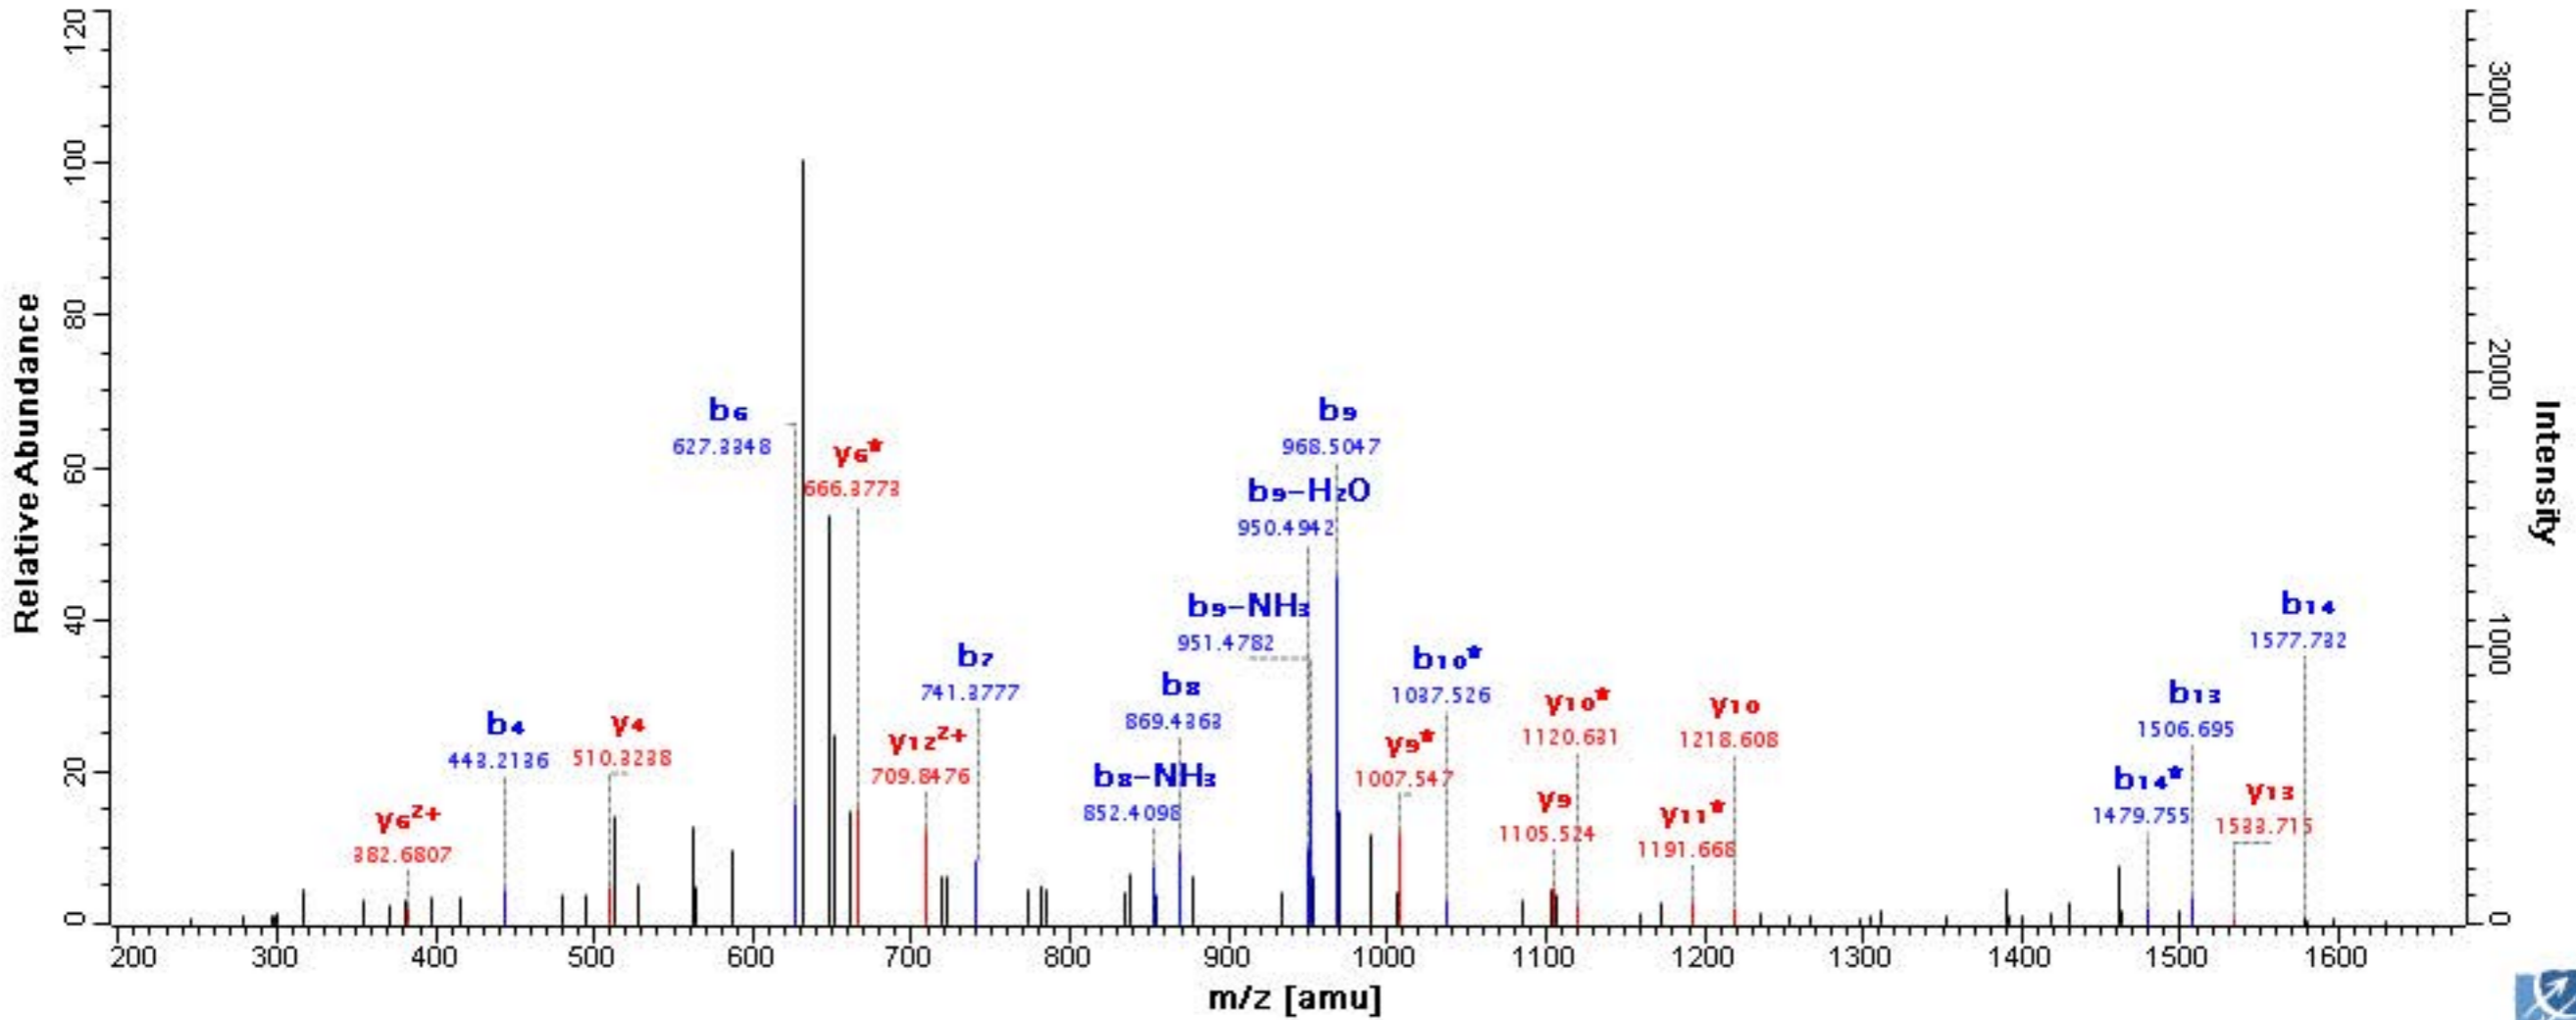

**precursor information**

|                   |                     |
|-------------------|---------------------|
| Mass:             | 1722.83012          |
| m/z:              | System.Collections. |
| Charge:           | System.Collections. |
| Retentiontime:    | System.Collections. |
| Score:            | 94.0069             |
| Mass Error [ppm]: | -0.033832           |
| PEP:              | 0.0001044           |
| Precursor Type:   | MULTI               |

| b ion      |              |    |     |    | γ ion        |            | γ <sup>2+</sup> ion |            |
|------------|--------------|----|-----|----|--------------|------------|---------------------|------------|
| Δ dalton   | mass         |    | seq |    | Δ dalton     | mass       | Δ dalton            | mass       |
|            | 100.07569038 | 1  | V   | 14 |              |            |                     |            |
|            | 199.1441043  | 2  | V   | 13 | 1632.7832392 |            | 1632.7832392        |            |
|            | 314.17104733 | 3  | D   | 12 | 1533.7148253 | +0.1053651 | 1533.7148253        |            |
| +0.1279123 | 443.21364043 | 4  | E   | 11 | 1418.6878823 |            | 709.84757937        | -0.2654871 |
|            | 514.25075422 | 5  | A   | 10 | 1289.6452892 |            | 1289.6452892        |            |
| +0.0548913 | 627.3348182  | 6  | I   | 9  | 1218.6081754 | +0.0604037 | 1218.6081754        |            |
| -0.3369131 | 741.37774564 | 7  | N   | 8  | 1105.5241114 | -0.0480372 | 1105.5241114        |            |
| +0.0090504 | 869.43632315 | 8  | Q   | 7  | 991.48118397 |            | 991.48118397        |            |
| -0.0770027 | 968.50473707 | 9  | V   | 6  | 863.42260646 |            | 863.42260646        |            |
|            | 1135.5030959 | 10 | S   | 5  | 764.35419254 |            | 382.6807345         | +0.4344999 |
|            | 1222.5351243 | 11 | S   | 4  | 597.35583372 |            | 597.35583372        |            |
|            | 1350.5937018 | 12 | Q   | 3  | 510.32380531 | +0.004808  | 510.32380531        |            |
| +0.115612  | 1506.6948128 | 13 | R   | 2  | 382.2652278  |            | 382.2652278         |            |
| -0.0384452 | 1577.7319266 | 14 | A   | 1  | 226.16411677 |            | 226.16411677        |            |
|            |              | 15 | K   | 0  | 155.12700298 |            | 155.12700298        |            |

**general information**

|                       |             |
|-----------------------|-------------|
| Annotation:           | 11 of 15    |
| AminoAcids Coverag    | 73 %        |
| Intensity Coverage:   | 31 %        |
| Protein Localisation: | 220 ... 234 |

Source: 201 20530\_VR\_Bsu\_TripleSILAC\_pWTPPrkCPrpC\_F03  
 Scannumber: 5397  
 Protein: BSU1 9360; citM; odhB  
 Peptide Score: 132.31  
 Method: ITMS; CID; 3

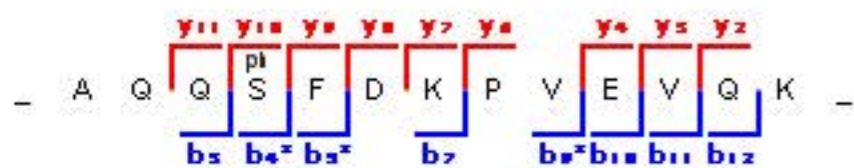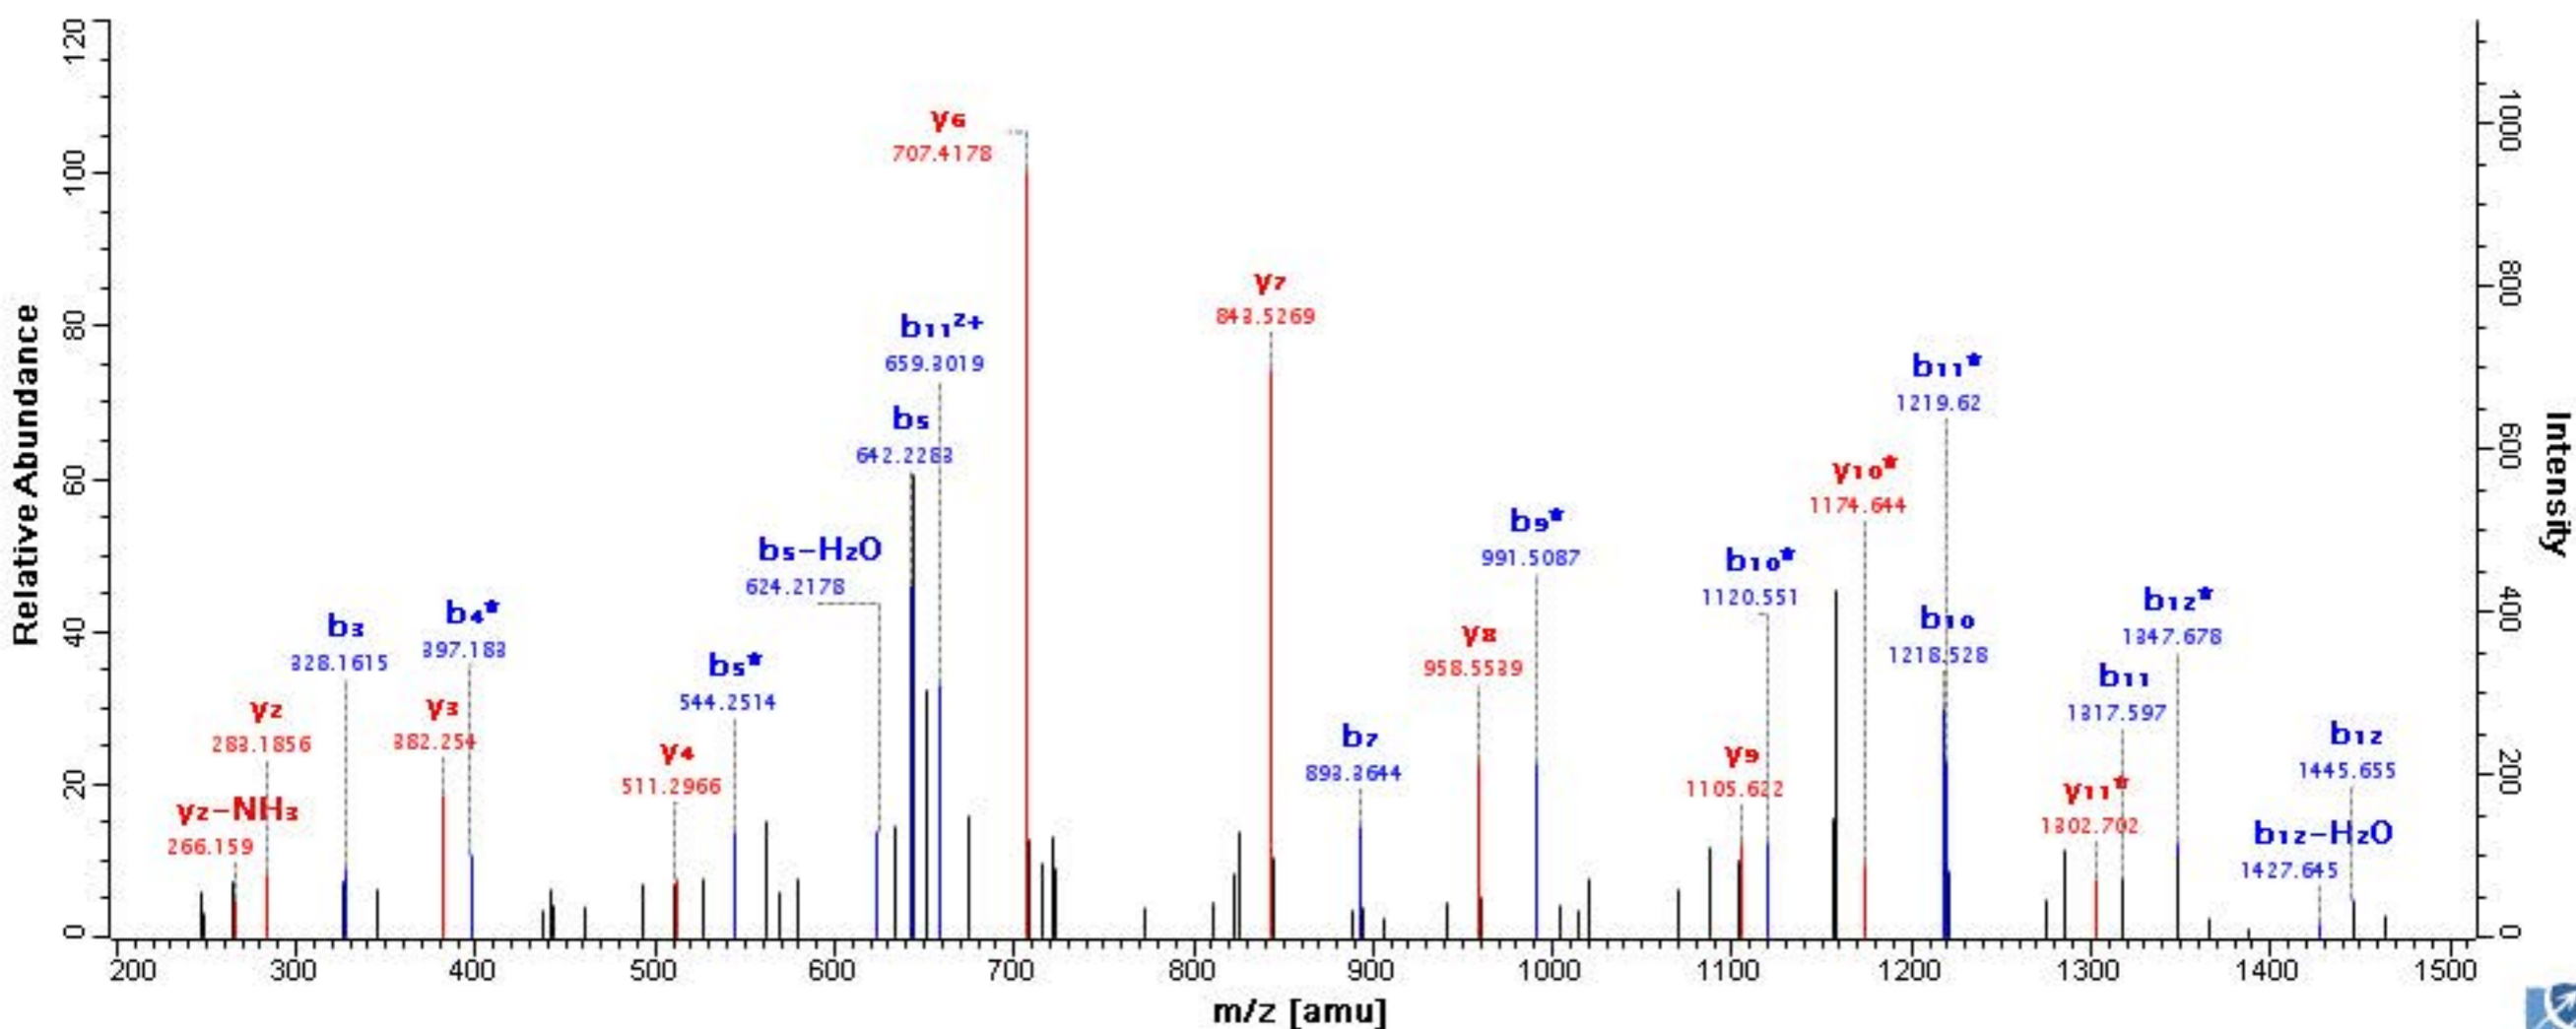

#### precursor information

|                   |                     |
|-------------------|---------------------|
| Mass:             | 1582.74018          |
| m/z:              | System.Collections. |
| Charge:           | System.Collections. |
| Retentiontime:    | System.Collections. |
| Score:            | 132.3096            |
| Mass Error [ppm]: | 0.5918              |
| PEP:              | 1.6273E-13          |
| Precursor Type:   | MULTI               |

#### general information

|                       |             |
|-----------------------|-------------|
| Annotation:           | 10 of 13    |
| AminoAcids Coverag    | 77 %        |
| Intensity Coverage:   | 51 %        |
| Protein Localisation: | 179 ... 191 |

| b <sup>2+</sup> ion |              | b ion           |              |     | y ion           |      |                         |
|---------------------|--------------|-----------------|--------------|-----|-----------------|------|-------------------------|
| $\Delta$ dalton     | mass         | $\Delta$ dalton | mass         | seq | $\Delta$ dalton | mass |                         |
|                     | 72.044390254 |                 | 72.044390254 | 1   | A               | 12   |                         |
|                     | 200.10296777 |                 | 200.10296777 | 2   | Q               | 11   | 1528.7377979            |
|                     | 328.16154528 | +0.1341701      | 328.16154528 | 3   | Q               | 10   | 1400.6792204            |
|                     | 495.1599041  |                 | 495.1599041  | 4   | S               | 9    | 1272.6206429            |
|                     | 642.22831801 | +0.4092552      | 642.22831801 | 5   | F               | 8    | 1105.6222841 +0.0283507 |
|                     | 757.25526104 |                 | 757.25526104 | 6   | D               | 7    | 958.55387014 +0.1082392 |
|                     | 893.36442287 | +0.0727719      | 893.36442287 | 7   | K               | 6    | 843.52692711 +0.02361   |
|                     | 990.41718673 |                 | 990.41718673 | 8   | P               | 5    | 707.41776528 -0.0483195 |
|                     | 1089.4856006 |                 | 1089.4856006 | 9   | V               | 4    | 610.36500142            |
|                     | 1218.5281937 | +0.0374801      | 1218.5281937 | 10  | E               | 3    | 511.29658751 +0.2124457 |
| +0.0048817          | 659.30194206 | -0.2417493      | 1317.5966077 | 11  | V               | 2    | 382.25399441 +0.048862  |
|                     | 1445.6551852 | +0.1891752      | 1445.6551852 | 12  | Q               | 1    | 283.1855805 +0.0154083  |
|                     |              |                 |              | 13  | K               | 0    | 155.12700298            |

Source: 20120530\_VR\_Bsu\_TripleSILAC\_pWTPPrkCPrpC\_F03  
 Scannumber: 5592  
 Protein: BSU01120; fus; fusA  
 Peptide Score: 116.3  
 Method: ITMS; CID; 3

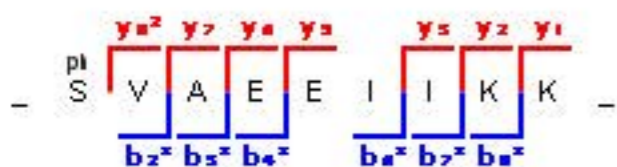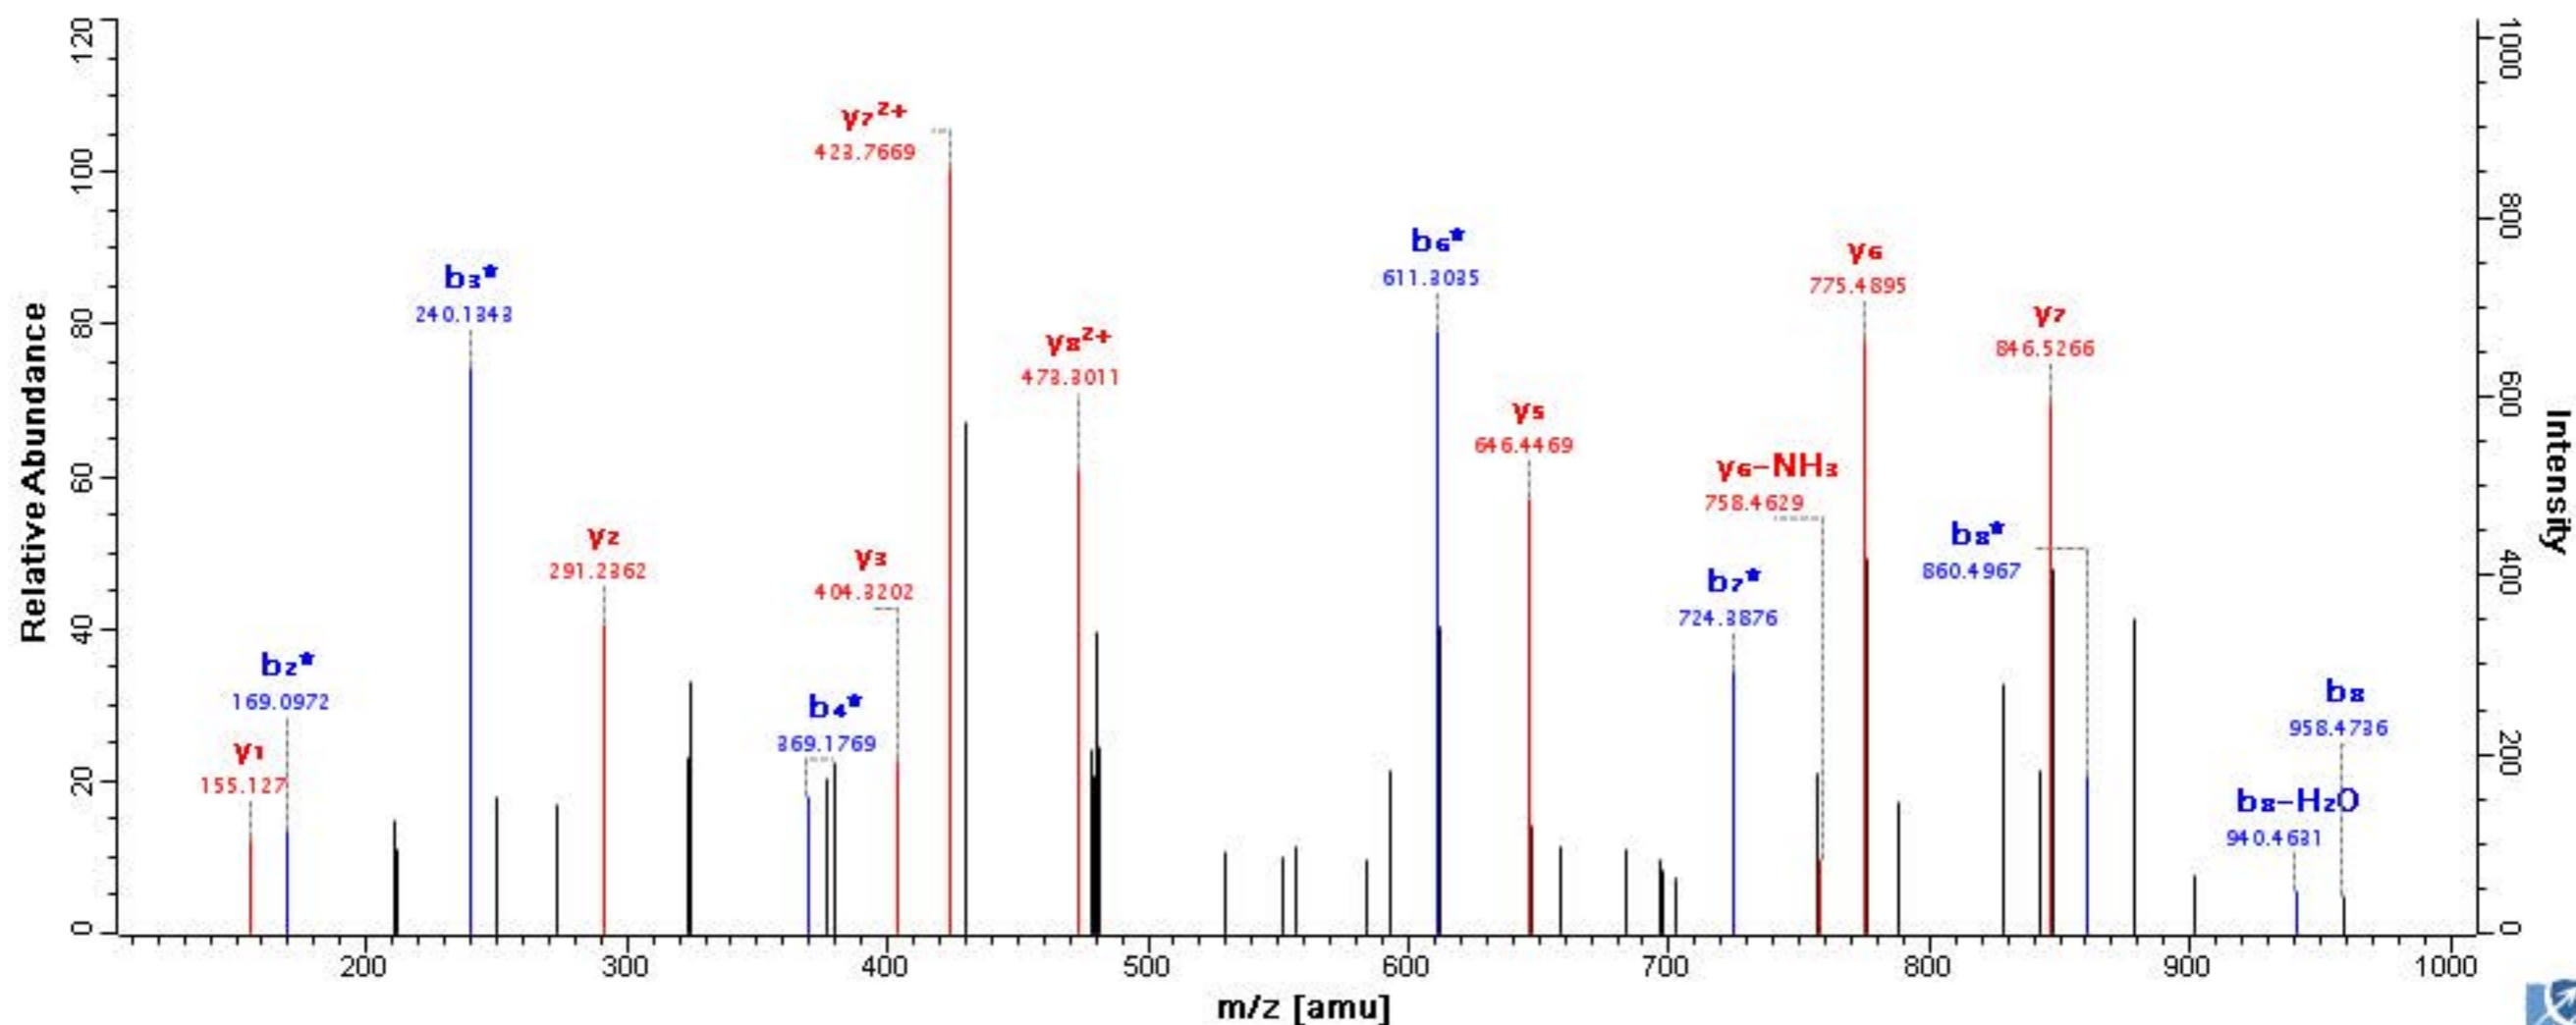

**precursor information**

|                       |                     |
|-----------------------|---------------------|
| Mass:                 | 1095.55765          |
| m/z:                  | System.Collections. |
| Charge:               | System.Collections. |
| Retentiontime:        | System.Collections. |
| Score:                | 116.3045            |
| Mass Error [ppm]:     | -0.039527           |
| PEP:                  | 0.0001479           |
| g Precursor Type:     | MULTI               |
| Annotation:           | 8 of 9              |
| AminoAcids Coverag    | 89 %                |
| Intensity Coverage:   | 49 %                |
| Protein Localisation: | 680 ... 688         |

| b ion      |              |   |     |   | y ion        |            | y <sup>2+</sup> ion |            |
|------------|--------------|---|-----|---|--------------|------------|---------------------|------------|
| Δ dalton   | mass         |   | seq |   | Δ dalton     | mass       | Δ dalton            | mass       |
|            | 168.00563528 | 1 | S   | 8 |              |            |                     |            |
|            | 267.0740492  | 2 | V   | 7 | 945.59500667 |            | 473.30114157        | +0.0136167 |
|            | 338.11116299 | 3 | A   | 6 | 846.52659276 | +0.0188174 | 423.76693461        | +0.1477382 |
|            | 467.15375609 | 4 | E   | 5 | 775.48947897 | +0.022545  | 775.48947897        |            |
|            | 596.19634918 | 5 | E   | 4 | 646.44688587 | +0.0589735 | 646.44688587        |            |
|            | 709.28041316 | 6 | I   | 3 | 517.40429278 |            | 517.40429278        |            |
|            | 822.36447714 | 7 | I   | 2 | 404.3202288  | -0.100136  | 404.3202288         |            |
| +0.2148376 | 958.47363897 | 8 | K   | 1 | 291.23616481 | -0.1302688 | 291.23616481        |            |
|            |              | 9 | K   | 0 | 155.12700298 | +0.060497  | 155.12700298        |            |

Source: 20120530\_VR\_Bsu\_TripleSILAC\_pWTPPrkCPrpC\_F03  
 Scannumber: 5626  
 Protein: BSU16910; ymfM  
 Peptide Score: 196.11  
 Method: ITMS; CID; 3

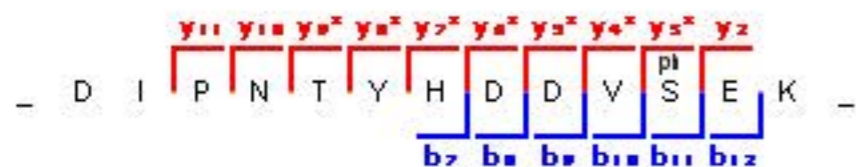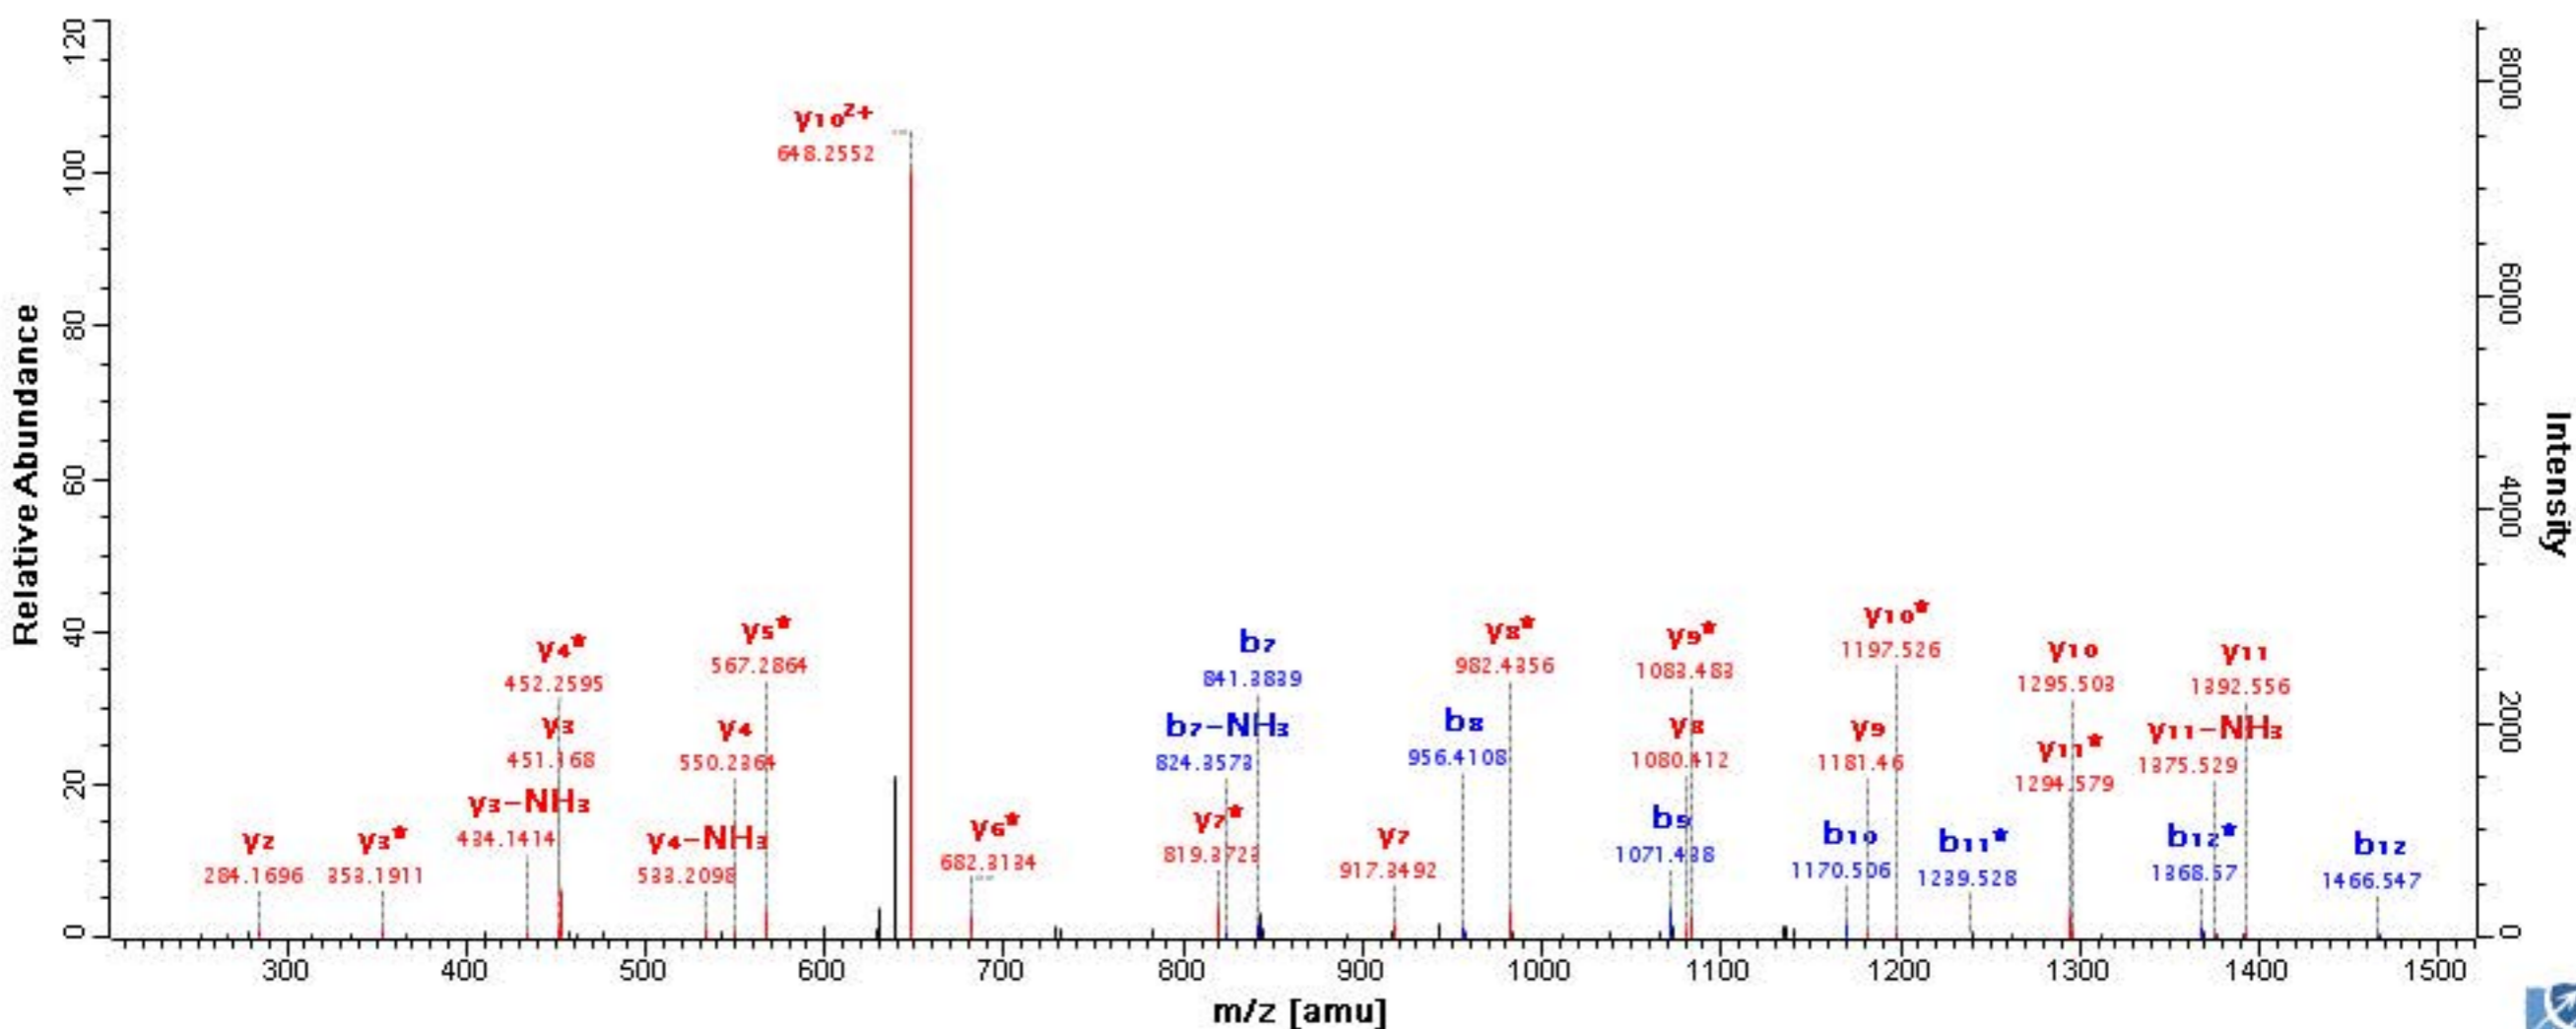

**precursor information**

|                   |                     |
|-------------------|---------------------|
| Mass:             | 1619.65884          |
| m/z:              | System.Collections. |
| Charge:           | System.Collections. |
| Retentiontime:    | System.Collections. |
| Score:            | 196.1098            |
| Mass Error [ppm]: | -0.46732            |
| PEP:              | 6.1846E-88          |
| Precursor Type:   | ISO                 |

**general information**

|                       |           |
|-----------------------|-----------|
| Annotation:           | 10 of 13  |
| AminoAcids Coverag    | 77 %      |
| Intensity Coverage:   | 73 %      |
| Protein Localisation: | 59 ... 71 |

| b ion        |              |     |   |    | gamma ion    |            |              | gamma^2+ ion |  |
|--------------|--------------|-----|---|----|--------------|------------|--------------|--------------|--|
| delta dalton | mass         | seq |   |    | delta dalton | mass       | delta dalton | mass         |  |
|              | 116.0342195  | 1   | D | 12 |              |            |              |              |  |
|              | 229.11828348 | 2   | I | 11 | 1505.639929  |            | 1505.639929  |              |  |
|              | 326.17104733 | 3   | P | 10 | 1392.5558651 | +0.1747258 | 1392.5558651 |              |  |
|              | 440.21397478 | 4   | N | 9  | 1295.5031012 | +0.049267  | 648.25518883 | -0.3431405   |  |
|              | 541.26165325 | 5   | T | 8  | 1181.4601738 | +0.0278634 | 1181.4601738 |              |  |
|              | 704.32498179 | 6   | Y | 7  | 1080.4124953 | +0.0784715 | 1080.4124953 |              |  |
| +0.0463432   | 841.38389365 | 7   | H | 6  | 917.34916674 | +0.1102449 | 917.34916674 |              |  |
| +0.036612    | 956.41083668 | 8   | D | 5  | 780.29025488 |            | 780.29025488 |              |  |
| -0.042516    | 1071.4377797 | 9   | D | 4  | 665.26331185 |            | 665.26331185 |              |  |
| -0.0982346   | 1170.5061936 | 10  | V | 3  | 550.23636881 | -0.0142619 | 550.23636881 |              |  |
|              | 1337.5045525 | 11  | S | 2  | 451.1679549  | +0.0081315 | 451.1679549  |              |  |
| -0.0772969   | 1466.5471455 | 12  | E | 1  | 284.16959608 | +0.0826622 | 284.16959608 |              |  |
|              |              | 13  | K | 0  | 155.12700298 |            | 155.12700298 |              |  |

Source: 201 20530\_VR\_Bsu\_TripleSILAC\_pWTPPrkCPrpC\_F03  
 Scannumber: 5804  
 Protein: BSU20590; yoqL  
 Peptide Score: 76.52  
 Method: ITMS; CID; 3

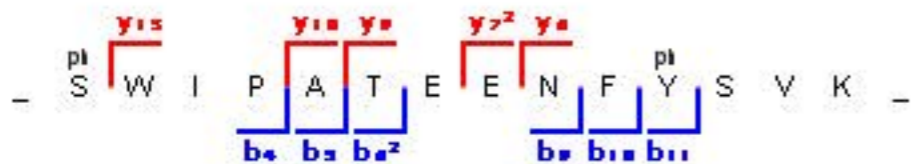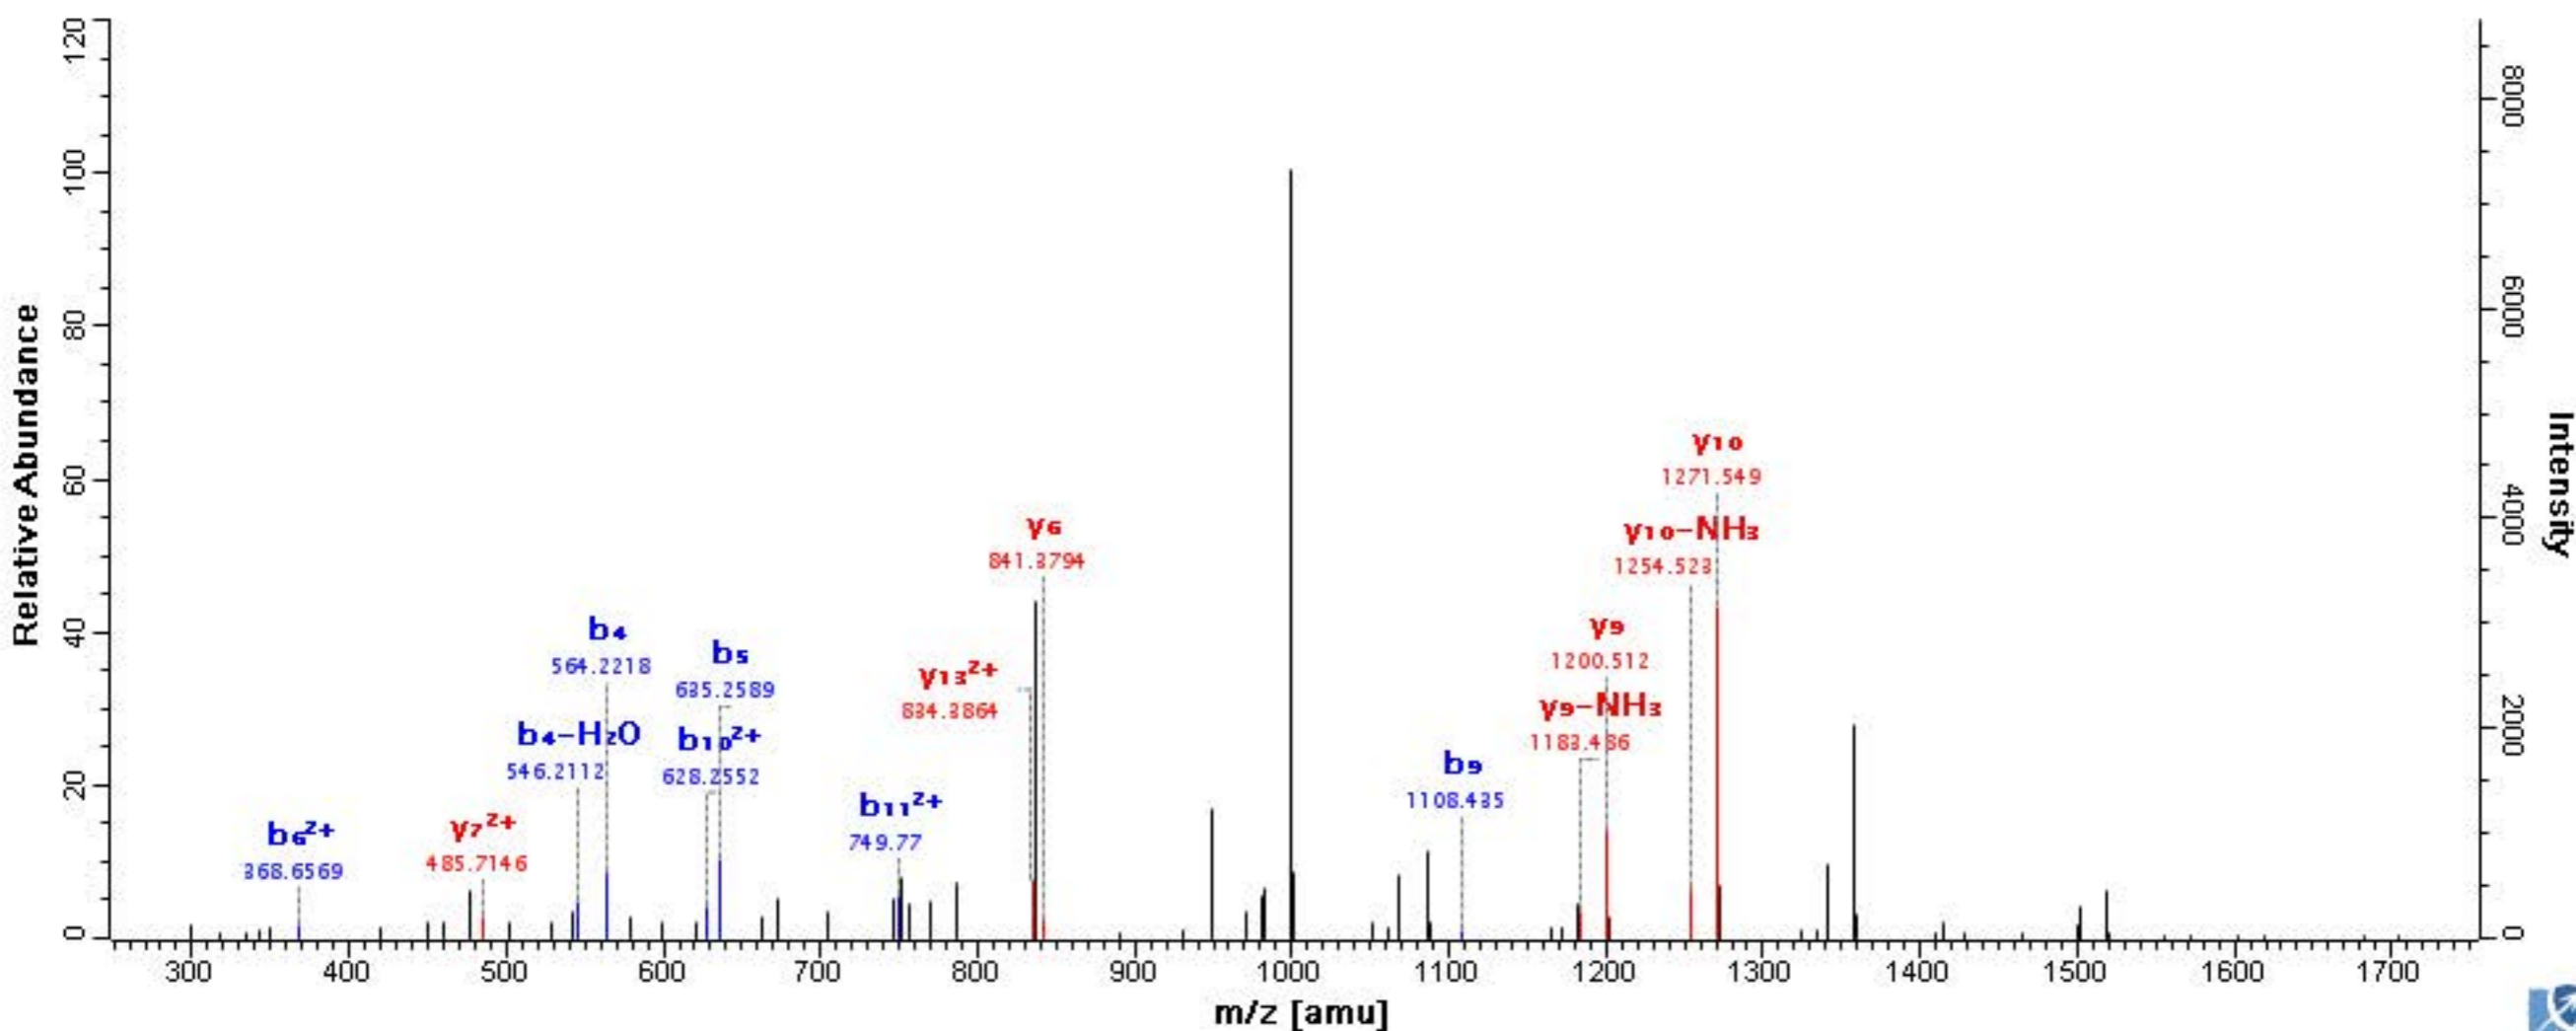

#### precursor information

|                   |                     |
|-------------------|---------------------|
| Mass:             | 1833.75815          |
| m/z:              | System.Collections. |
| Charge:           | System.Collections. |
| Retentiontime:    | System.Collections. |
| Score:            | 76.52248            |
| Mass Error [ppm]: | 0.87184             |
| PEP:              | 0.10526             |
| Precursor Type:   | ISO                 |

#### general information

|                       |           |
|-----------------------|-----------|
| Annotation:           | 8 of 14   |
| AminoAcids Coverag    | 57 %      |
| Intensity Coverage:   | 23 %      |
| Protein Localisation: | 22 ... 35 |

| b <sup>2+</sup> ion |          | b ion     |          |    |     |    | y ion    |           | y <sup>2+</sup> ion |           |
|---------------------|----------|-----------|----------|----|-----|----|----------|-----------|---------------------|-----------|
| Δ dalton            | mass     | Δ dalton  | mass     |    | seq |    | Δ dalton | mass      | Δ dalton            | mass      |
|                     | 168.0056 |           | 168.0056 | 1  | S   | 13 |          |           |                     |           |
|                     | 354.0849 |           | 354.0849 | 2  | W   | 12 | 1667.765 |           | 834.3864            | +0.092019 |
|                     | 467.169  |           | 467.169  | 3  | I   | 11 | 1481.686 |           | 1481.686            |           |
|                     | 564.2218 | +0.069911 | 564.2218 | 4  | P   | 10 | 1368.602 |           | 1368.602            |           |
|                     | 635.2589 | -0.002359 | 635.2589 | 5  | A   | 9  | 1271.549 | -0.031144 | 1271.549            |           |
| -0.412721           | 368.6569 |           | 736.3066 | 6  | T   | 8  | 1200.512 | +0.072376 | 1200.512            |           |
|                     | 865.3492 |           | 865.3492 | 7  | E   | 7  | 1099.465 |           | 1099.465            |           |
|                     | 994.3918 |           | 994.3918 | 8  | E   | 6  | 970.4219 |           | 485.7146            | -0.254529 |
|                     | 1108.435 | -0.008657 | 1108.435 | 9  | N   | 5  | 841.3794 | -0.043721 | 841.3794            |           |
| -0.298948           | 628.2552 |           | 1255.503 | 10 | F   | 4  | 727.3364 |           | 727.3364            |           |
| -0.421871           | 749.77   |           | 1498.533 | 11 | Y   | 3  | 580.268  |           | 580.268             |           |
|                     | 1585.565 |           | 1585.565 | 12 | S   | 2  | 337.2384 |           | 337.2384            |           |
|                     | 1684.633 |           | 1684.633 | 13 | V   | 1  | 250.2063 |           | 250.2063            |           |
|                     |          |           |          | 14 | K   | 0  | 151.1379 |           | 151.1379            |           |

Source: 20120530\_VR\_Bsu\_TripleSILAC\_pWTPPrkCPrpC\_F03  
 Scannumber: 6688  
 Protein: BSU00860; clpC; mecB  
 Peptide Score: 63.09  
 Method: ITMS; CID; 3

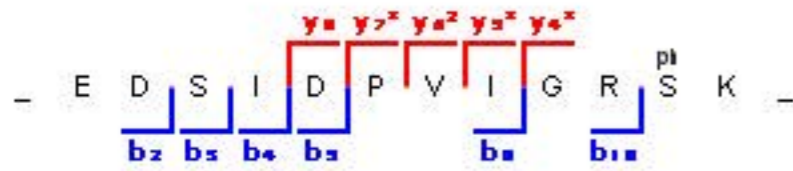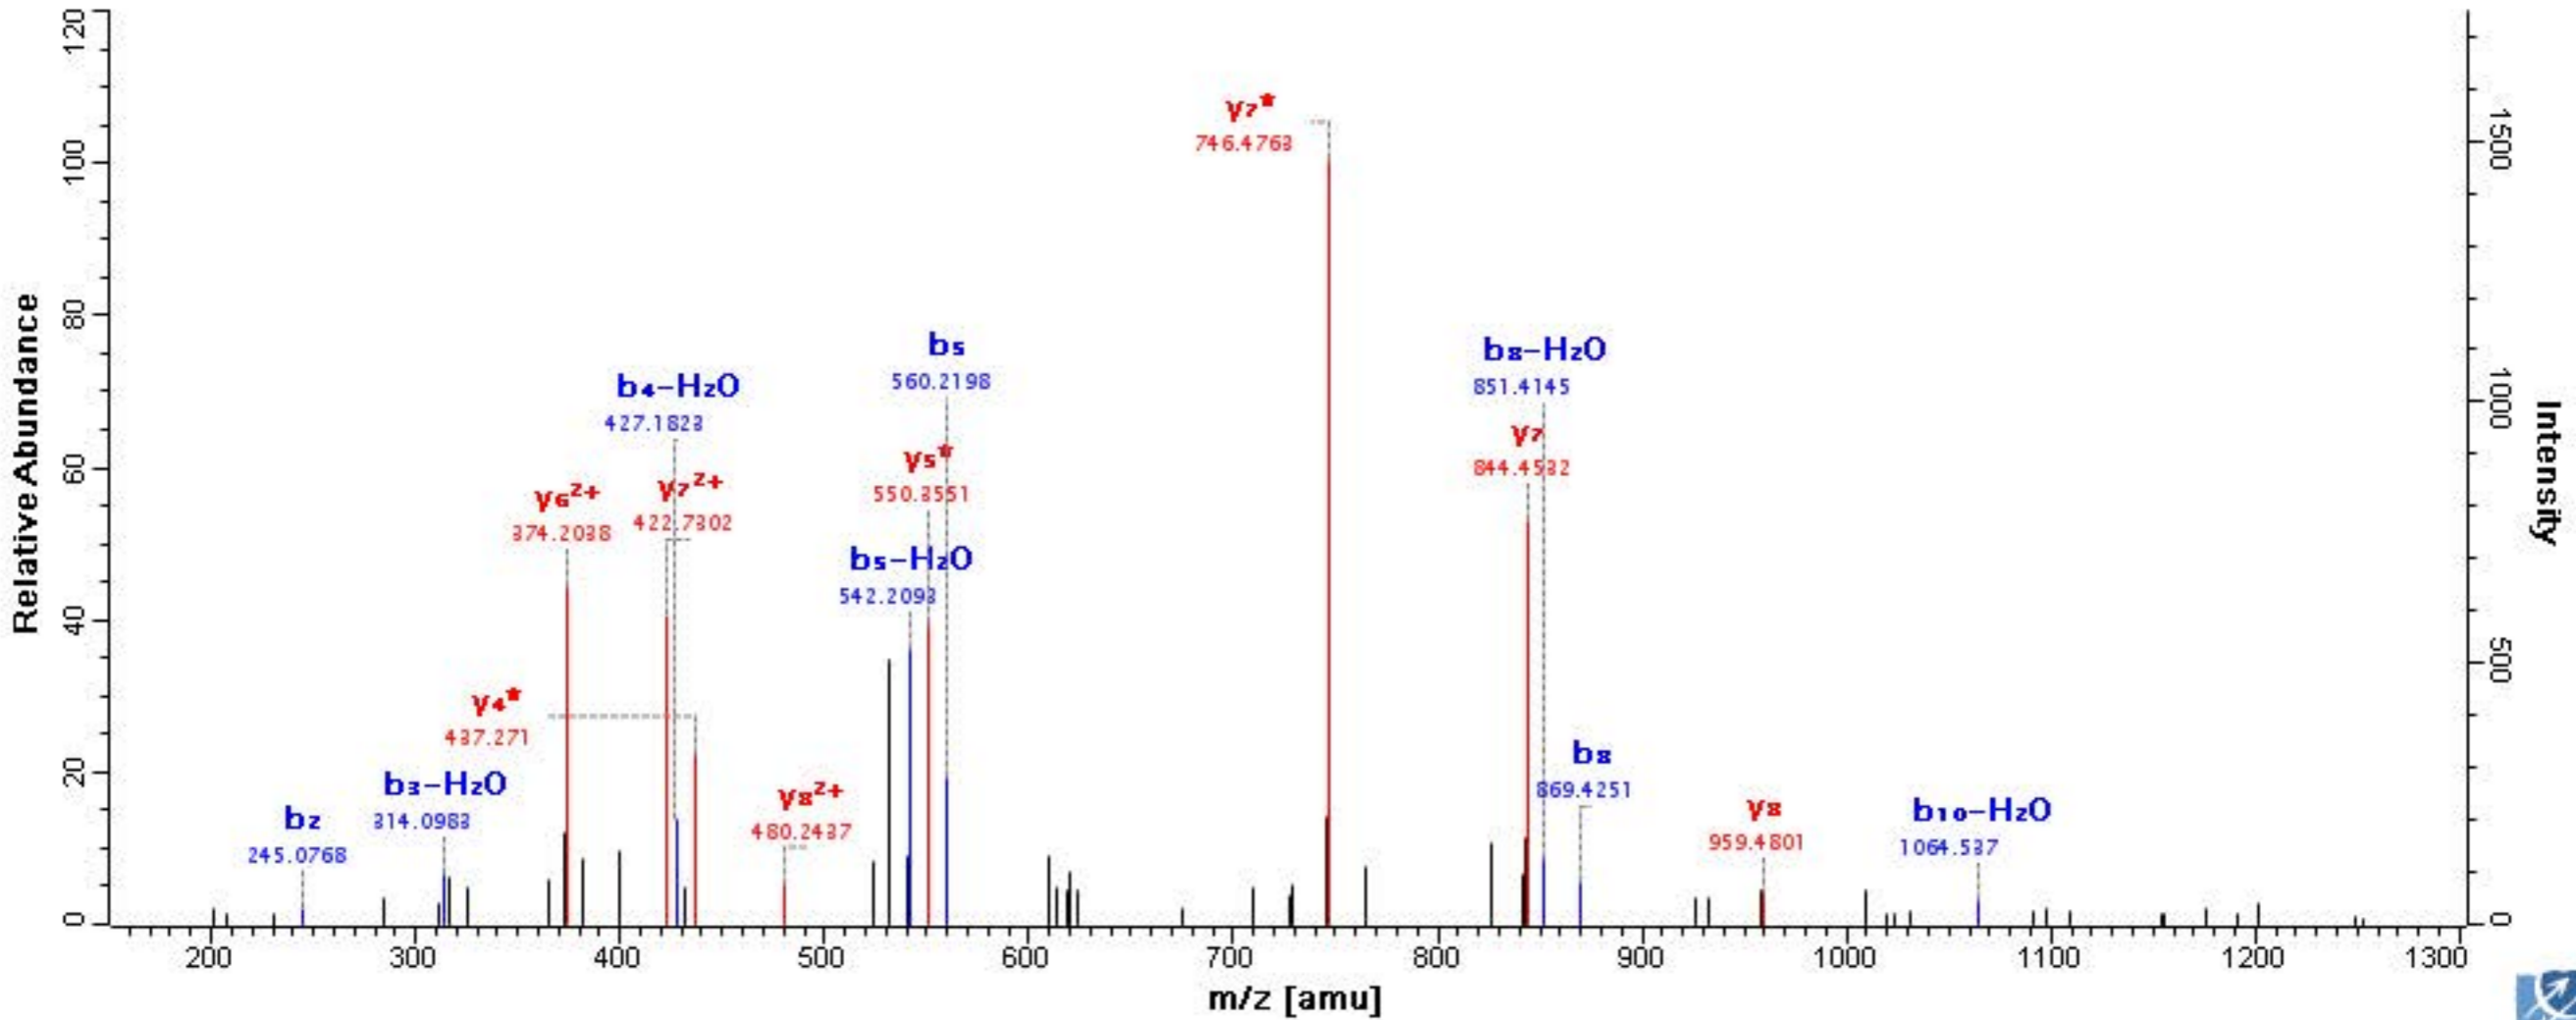

#### precursor information

|                   |                     |
|-------------------|---------------------|
| Mass:             | 1394.6445           |
| m/z:              | System.Collections. |
| Charge:           | System.Collections. |
| Retentiontime:    | System.Collections. |
| Score:            | 63.09117            |
| Mass Error [ppm]: | 0.16029             |
| PEP:              | 0.034099            |
| Precursor Type:   | MULTI               |

#### general information

|                       |             |
|-----------------------|-------------|
| Annotation:           | 9 of 12     |
| AminoAcids Coverag    | 75 %        |
| Intensity Coverage:   | 62 %        |
| Protein Localisation: | 176 ... 187 |

| b ion      |              |    |     |    | γ ion        |            | γ <sup>2+</sup> ion |            |
|------------|--------------|----|-----|----|--------------|------------|---------------------|------------|
| Δ dalton   | mass         |    | seq |    | Δ dalton     | mass       | Δ dalton            | mass       |
|            | 130.04986956 | 1  | E   | 11 |              |            |                     |            |
| -0.3177641 | 245.07681259 | 2  | D   | 10 | 1274.6231568 |            | 1274.6231568        |            |
|            | 332.108841   | 3  | S   | 9  | 1159.5962137 |            | 1159.5962137        |            |
|            | 445.19290499 | 4  | I   | 8  | 1072.5641853 |            | 1072.5641853        |            |
| +0.0448615 | 560.21984802 | 5  | D   | 7  | 959.48012133 | +0.2103694 | 480.2436989         | -0.106675  |
|            | 657.27261187 | 6  | P   | 6  | 844.4531783  | -0.0004805 | 422.73022738        | -0.1091336 |
|            | 756.34102579 | 7  | V   | 5  | 747.40041445 |            | 374.20384546        | -0.4905886 |
| +0.2035113 | 869.42508977 | 8  | I   | 4  | 648.33200053 |            | 648.33200053        |            |
|            | 926.44655349 | 9  | G   | 3  | 535.24793655 |            | 535.24793655        |            |
|            | 1082.5476645 | 10 | R   | 2  | 478.22647283 |            | 478.22647283        |            |
|            | 1249.5460233 | 11 | S   | 1  | 322.1253618  |            | 322.1253618         |            |
|            |              | 12 | K   | 0  | 155.12700298 |            | 155.12700298        |            |



Source: 20120530\_VR\_Bsu\_TripleSILAC\_pWTPPrkCPrpC\_F03  
 Scannumber: 7858  
 Protein: BSU06460; yexA  
 Peptide Score: 73.07  
 Method: ITMS; CID; 3

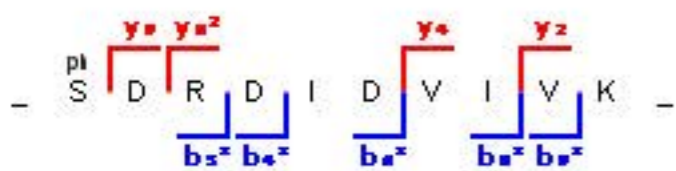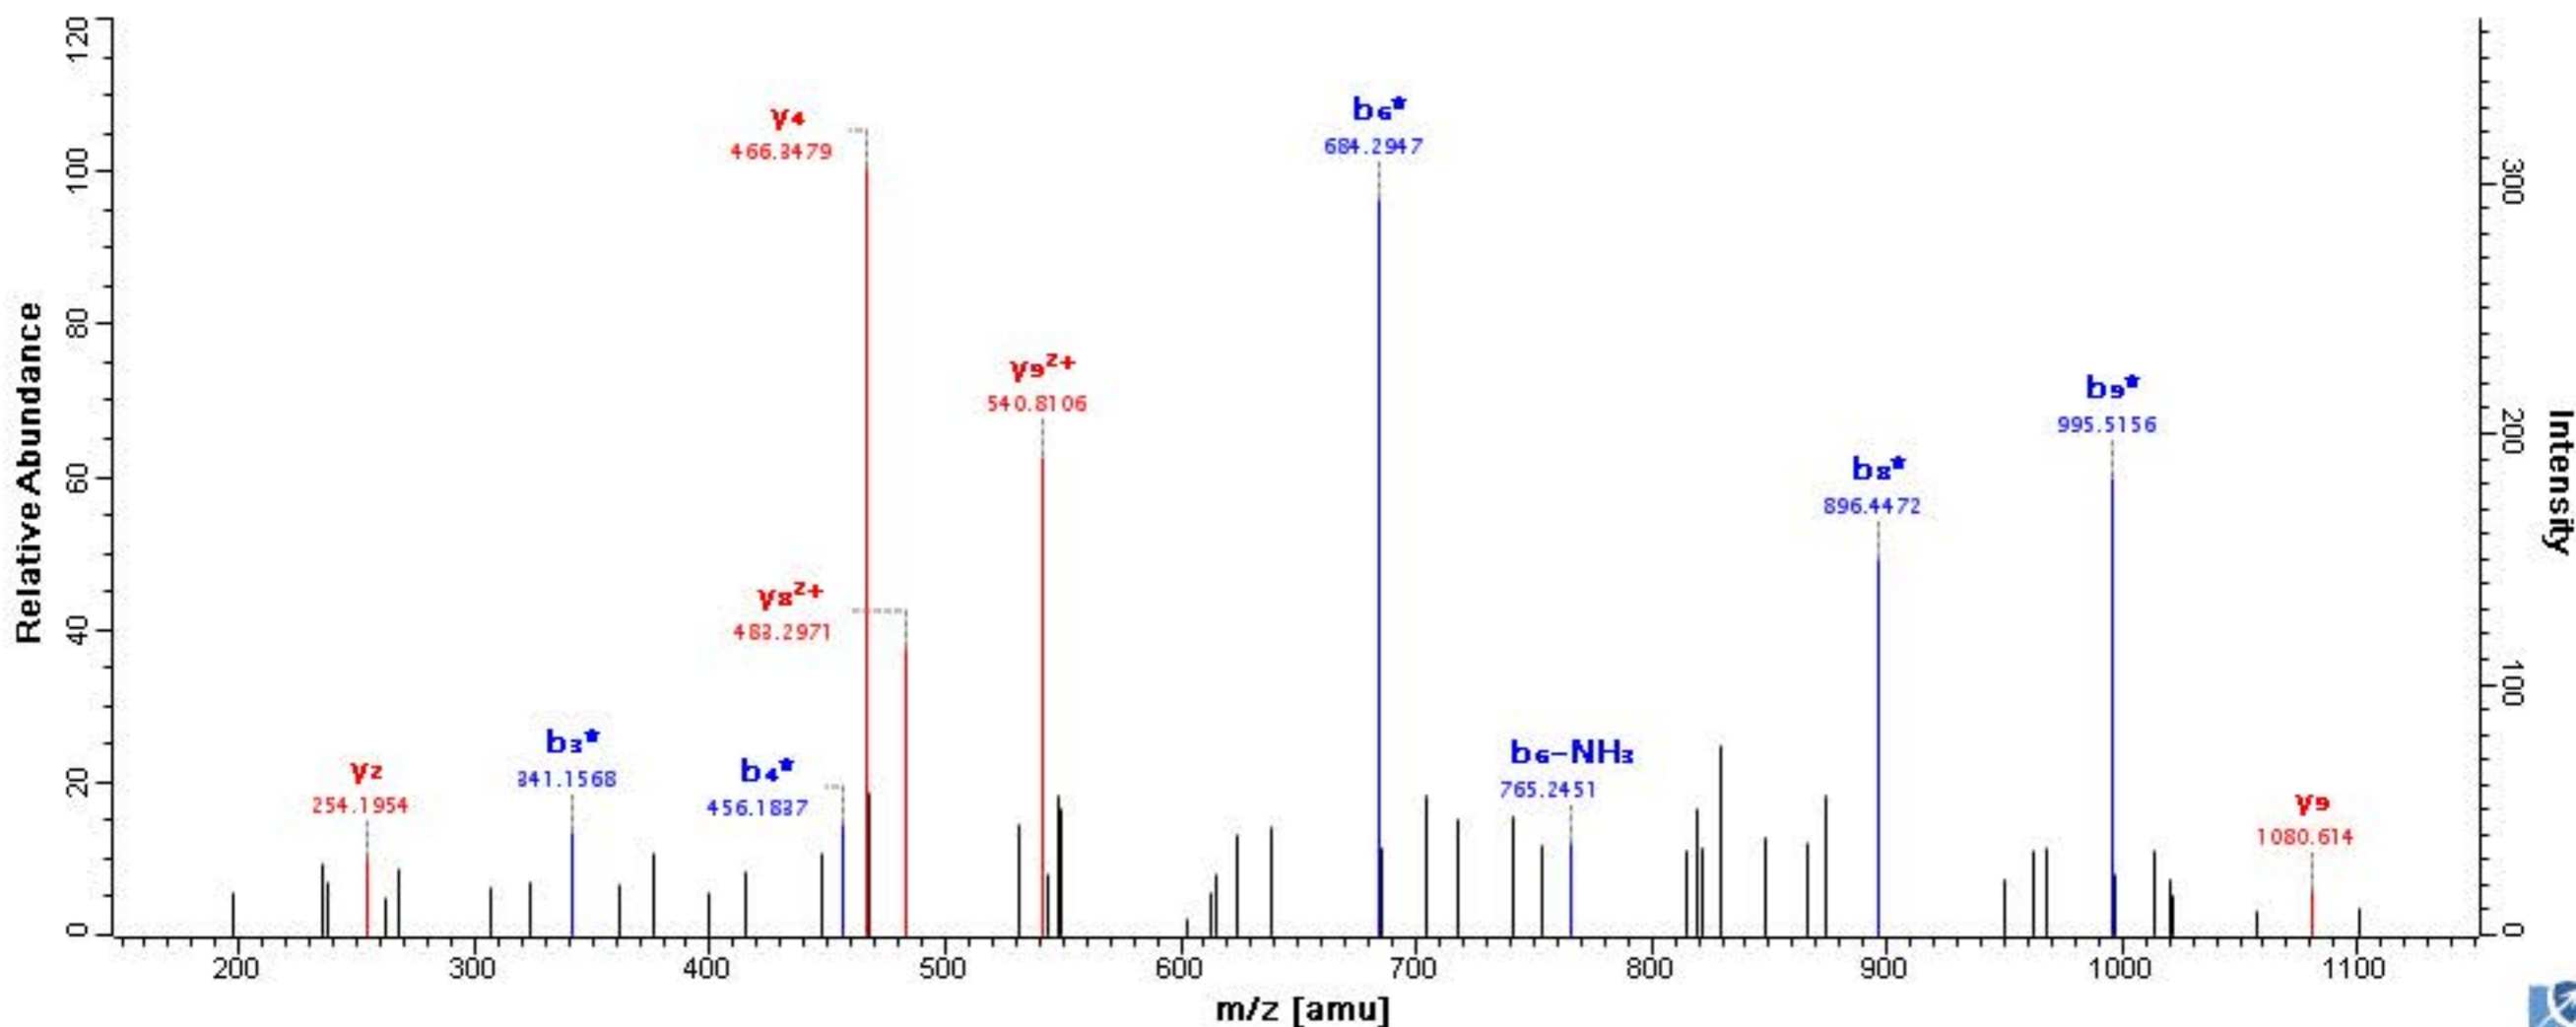

#### precursor information

|                   |                     |
|-------------------|---------------------|
| Mass:             | 1238.59056          |
| m/z:              | System.Collections. |
| Charge:           | System.Collections. |
| Retentiontime:    | System.Collections. |
| Score:            | 73.06665            |
| Mass Error [ppm]: | -0.18191            |
| PEP:              | 0.012249            |
| Precursor Type:   | MULTI               |

#### general information

|                       |           |
|-----------------------|-----------|
| Annotation:           | 7 of 10   |
| AminoAcids Coverage:  | 70 %      |
| Intensity Coverage:   | 50 %      |
| Protein Localisation: | 50 ... 59 |

| b ion    |              |    |     |   | y ion        |            | y <sup>2+</sup> ion |            |
|----------|--------------|----|-----|---|--------------|------------|---------------------|------------|
| Δ dalton | mass         |    | seq |   | Δ dalton     | mass       | Δ dalton            | mass       |
|          | 168.00563528 | 1  | S   | 9 |              |            |                     |            |
|          | 283.03257832 | 2  | D   | 8 | 1080.6138989 | -0.2863843 | 540.81058768        | +0.0905964 |
|          | 439.13368935 | 3  | R   | 7 | 965.58695587 |            | 483.29711617        | -0.1854218 |
|          | 554.16063238 | 4  | D   | 6 | 809.48584484 |            | 809.48584484        |            |
|          | 667.24469636 | 5  | I   | 5 | 694.45890181 |            | 694.45890181        |            |
|          | 782.27163939 | 6  | D   | 4 | 581.37483783 |            | 581.37483783        |            |
|          | 881.34005331 | 7  | V   | 3 | 466.3478948  | +0.0272883 | 466.3478948         |            |
|          | 994.42411729 | 8  | I   | 2 | 367.27948088 |            | 367.27948088        |            |
|          | 1093.4925312 | 9  | V   | 1 | 254.1954169  | -0.0473914 | 254.1954169         |            |
|          |              | 10 | K   | 0 | 155.12700298 |            | 155.12700298        |            |

Source: 20120530\_VR\_Bsu\_TripleSILAC\_pWTPPrkCPrpC\_F03  
 Scannumber: 8636  
 Protein: BSU17890; tkt; tktA  
 Peptide Score: 176.11  
 Method: ITMS; CID; 3

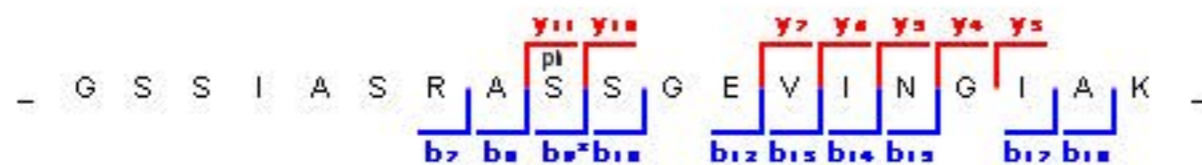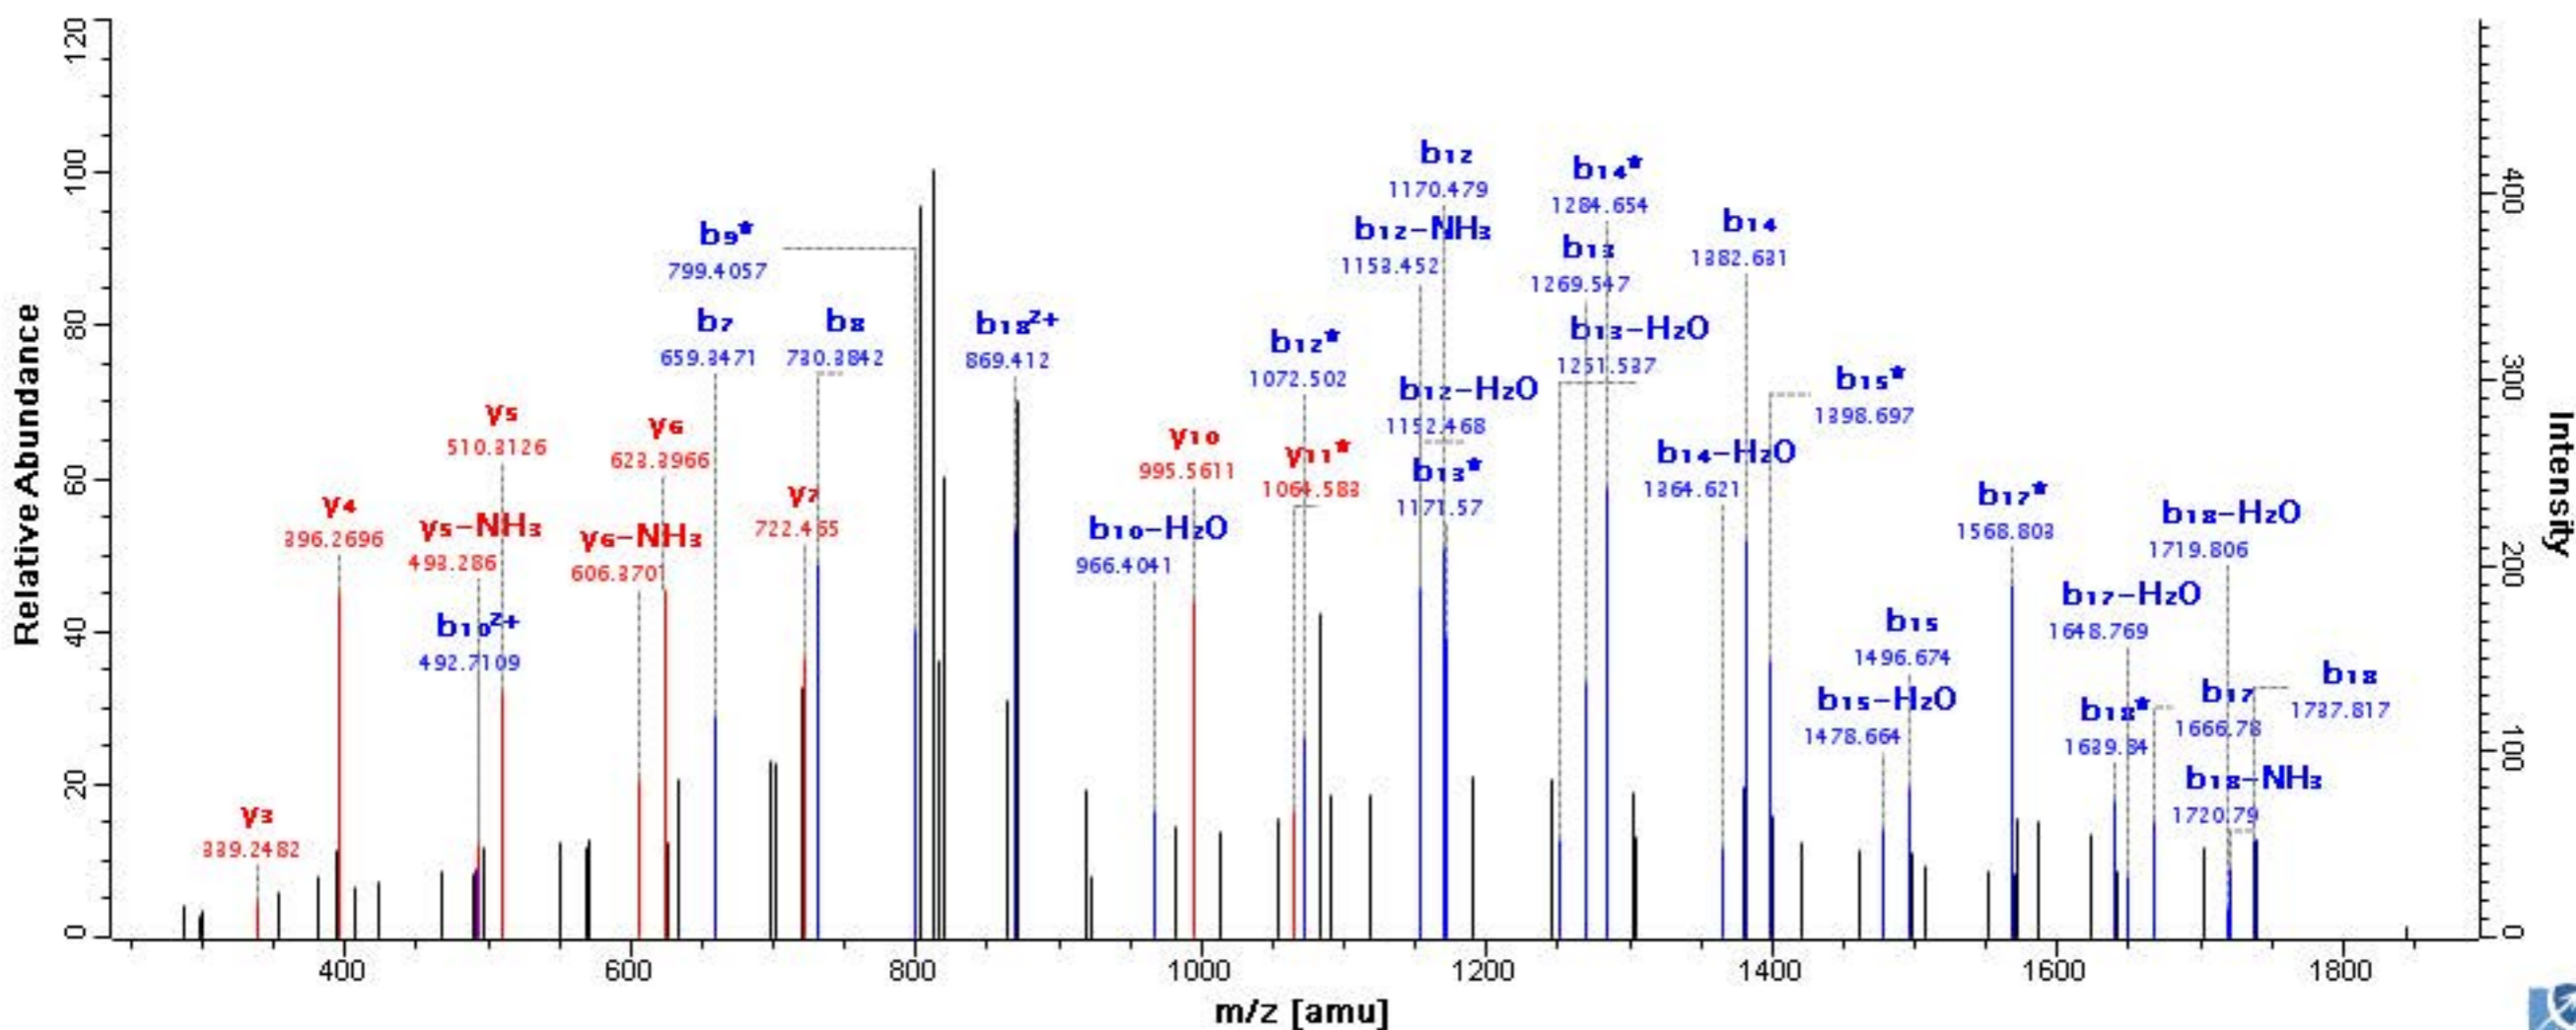

precursor information

|                   |                     |
|-------------------|---------------------|
| Mass:             | 1882.91458          |
| m/z:              | System.Collections. |
| Charge:           | System.Collections. |
| Retentiontime:    | System.Collections. |
| Score:            | 176.1133            |
| Mass Error [ppm]: | -0.20367            |
| PEP:              | 1.9529E-47          |
| Precursor Type:   | MULTI               |

| b <sup>2+</sup> ion |              | b ion      |              |     | y ion |          |              |            |
|---------------------|--------------|------------|--------------|-----|-------|----------|--------------|------------|
| Δ dalton            | mass         | Δ dalton   | mass         | seq |       | Δ dalton | mass         |            |
|                     | 58.02874019  |            | 58.02874019  | 1   | G     | 18       |              |            |
|                     | 145.0607686  |            | 145.0607686  | 2   | S     | 17       | 1834.9149817 |            |
|                     | 232.09279701 |            | 232.09279701 | 3   | S     | 16       | 1747.8829533 |            |
|                     | 345.17686099 |            | 345.17686099 | 4   | I     | 15       | 1660.8509249 |            |
|                     | 416.21397478 |            | 416.21397478 | 5   | A     | 14       | 1547.7668609 |            |
|                     | 503.24600319 |            | 503.24600319 | 6   | S     | 13       | 1476.7297471 |            |
|                     | 659.34711422 | +0.0023731 | 659.34711422 | 7   | R     | 12       | 1389.6977187 |            |
|                     | 730.384228   | +0.022022  | 730.384228   | 8   | A     | 11       | 1233.5966077 |            |
|                     | 897.38258682 |            | 897.38258682 | 9   | S     | 10       | 1162.5594939 |            |
| -0.282418           | 492.71094585 |            | 984.41461523 | 10  | S     | 9        | 995.56113505 | +0.0393899 |
|                     | 1041.436079  |            | 1041.436079  | 11  | G     | 8        | 908.52910664 |            |
|                     | 1170.4786721 | -0.0491066 | 1170.4786721 | 12  | E     | 7        | 851.50764292 |            |
|                     | 1269.547086  | +0.2208584 | 1269.547086  | 13  | V     | 6        | 722.46504982 | -0.0613633 |
|                     | 1382.6311499 | +0.0192407 | 1382.6311499 | 14  | I     | 5        | 623.3966359  | +0.0664989 |
|                     | 1496.6740774 | +0.1297556 | 1496.6740774 | 15  | N     | 4        | 510.31257192 | +0.0767713 |
|                     | 1553.6955411 |            | 1553.6955411 | 16  | G     | 3        | 396.26964448 | +0.1145718 |
|                     | 1666.7796051 | +0.0518158 | 1666.7796051 | 17  | I     | 2        | 339.24818075 | -0.0440182 |
| +0.4453021          | 869.41199768 | +0.0252001 | 1737.8167189 | 18  | A     | 1        | 226.16411677 |            |
|                     |              |            |              | 19  | K     | 0        | 155.12700298 |            |

general information

|                       |             |
|-----------------------|-------------|
| Annotation:           | 11 of 19    |
| AminoAcids Coverag    | 58 %        |
| Intensity Coverage:   | 47 %        |
| Protein Localisation: | 351 ... 369 |

Source: 20120530\_VR\_Bsu\_TripleSILAC\_pWTPPrkCPrpC\_F03  
 Scannumber: 9685  
 Protein: BSU33940; gap; gapA  
 Peptide Score: 65.16  
 Method: ITMS; CID; 3

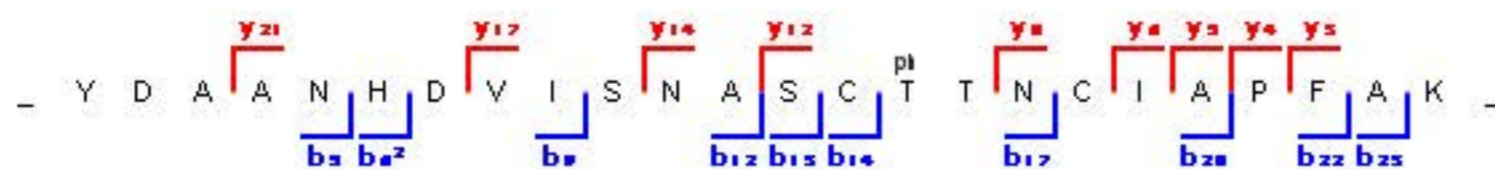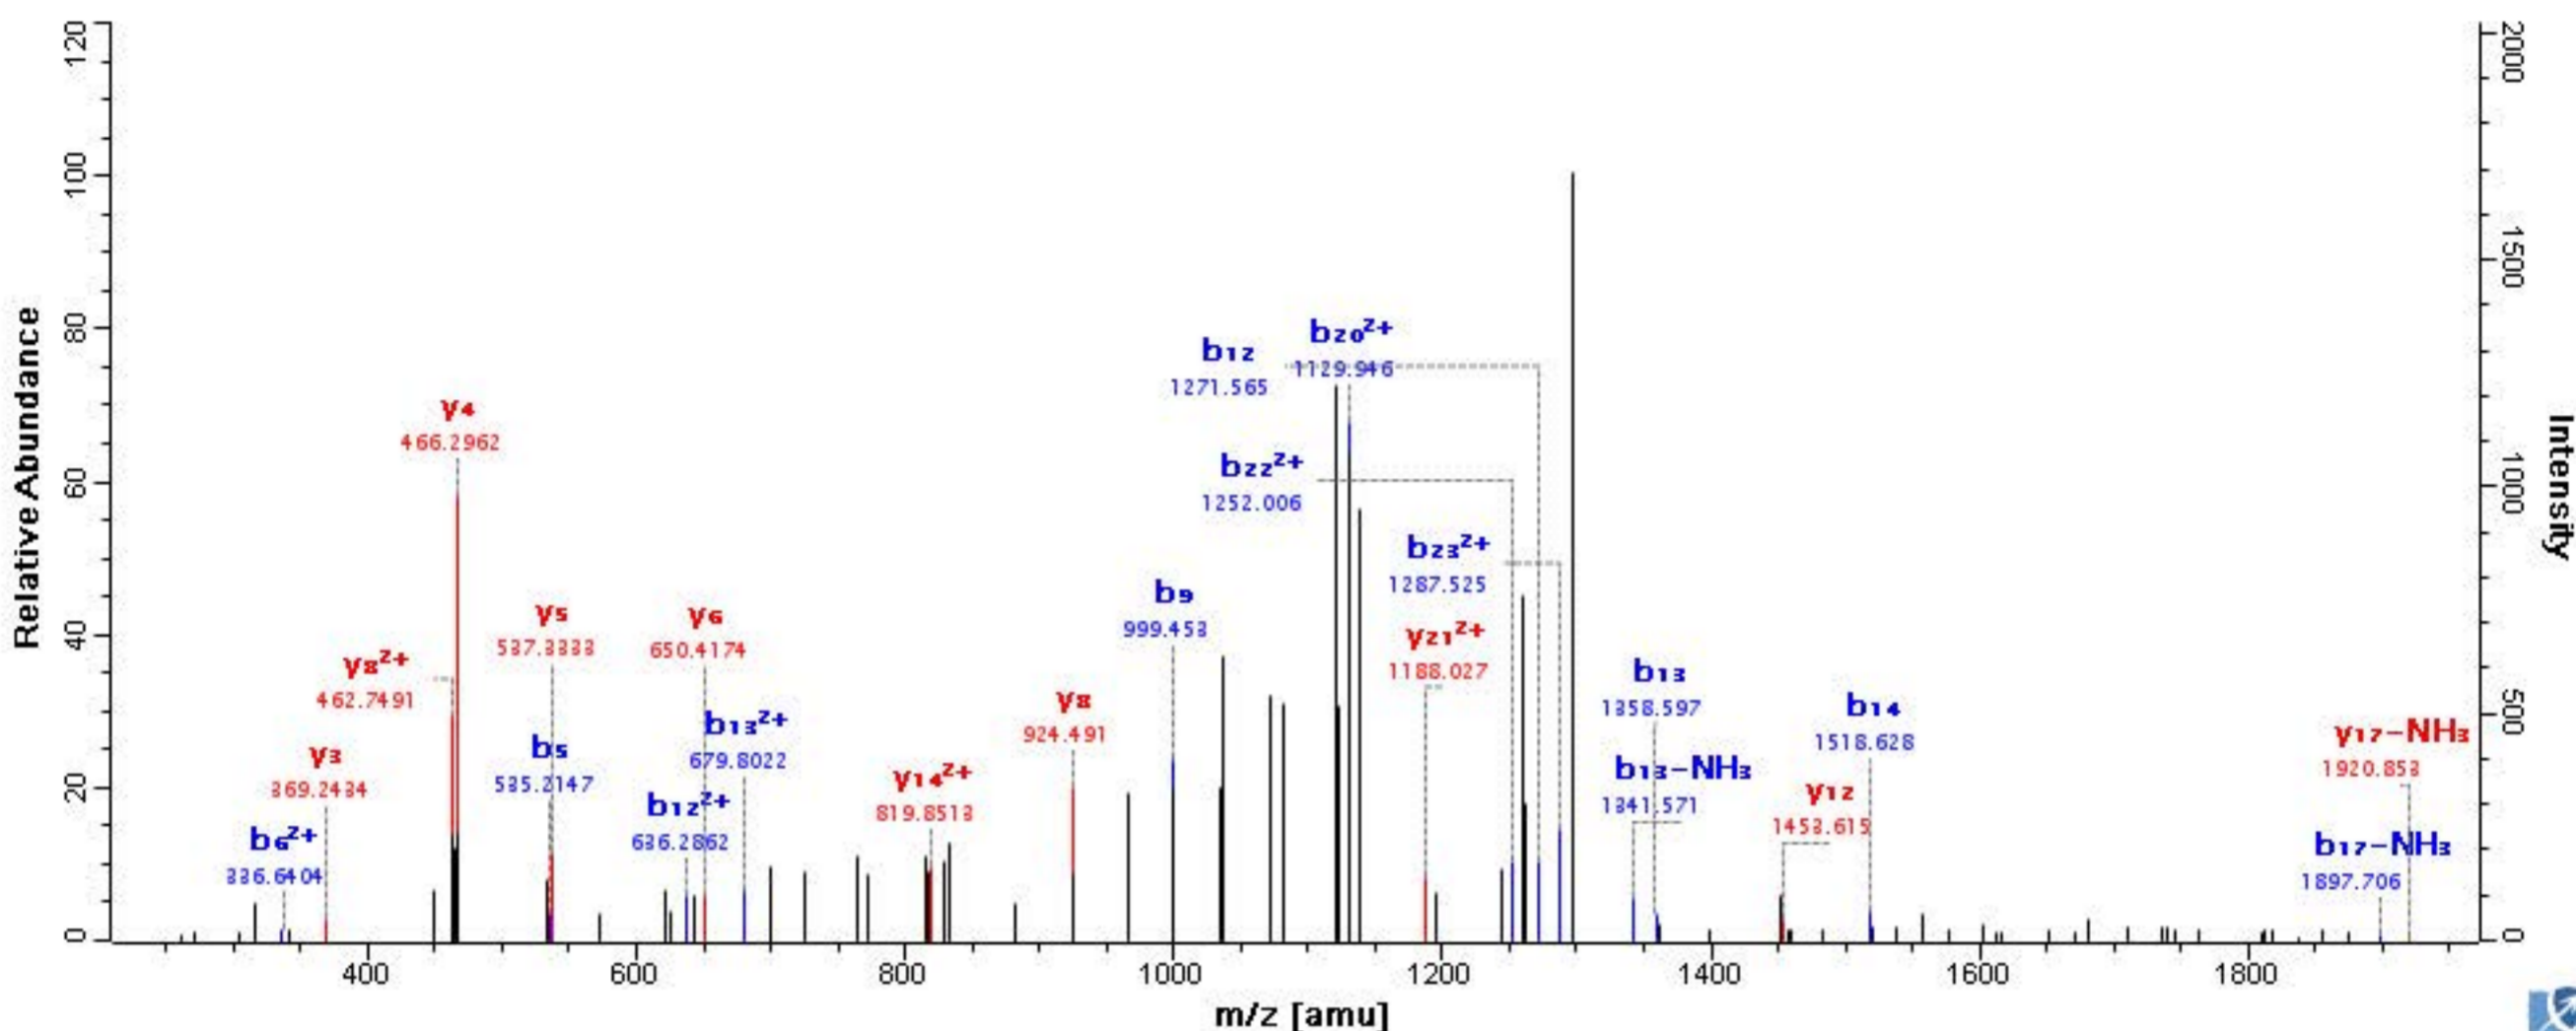

#### precursor information

|                   |                     |
|-------------------|---------------------|
| Mass:             | 2719.13983          |
| m/z:              | System.Collections. |
| Charge:           | System.Collections. |
| Retentiontime:    | System.Collections. |
| Score:            | 65.15955            |
| Mass Error [ppm]: | -0.34319            |
| PEP:              | 0.0012778           |
| Precursor Type:   | MULTI               |

| b <sup>2+</sup> ion |          | b ion     |          | seq |   |    | y ion    |           | y <sup>2+</sup> ion |           |
|---------------------|----------|-----------|----------|-----|---|----|----------|-----------|---------------------|-----------|
| Δ dalton            | mass     | Δ dalton  | mass     |     |   |    | Δ dalton | mass      | Δ dalton            | mass      |
|                     | 164.0706 |           | 164.0706 | 1   | Y | 23 |          |           |                     |           |
|                     | 279.0975 |           | 279.0975 | 2   | D | 22 | 2561.11  |           | 2561.11             |           |
|                     | 350.1347 |           | 350.1347 | 3   | A | 21 | 2446.083 |           | 2446.083            |           |
|                     | 421.1718 |           | 421.1718 | 4   | A | 20 | 2375.046 |           | 1188.027            | -0.456086 |
|                     | 535.2147 | +0.231525 | 535.2147 | 5   | N | 19 | 2304.009 |           | 2304.009            |           |
| -0.352299           | 336.6404 |           | 672.2736 | 6   | H | 18 | 2189.966 |           | 2189.966            |           |
|                     | 787.3006 |           | 787.3006 | 7   | D | 17 | 2052.907 |           | 2052.907            |           |
|                     | 886.369  |           | 886.369  | 8   | V | 16 | 1937.88  |           | 1937.88             |           |
|                     | 999.453  | -0.096163 | 999.453  | 9   | I | 15 | 1838.811 |           | 1838.811            |           |
|                     | 1086.485 |           | 1086.485 | 10  | S | 14 | 1725.727 |           | 1725.727            |           |
|                     | 1200.528 |           | 1200.528 | 11  | N | 13 | 1638.695 |           | 819.8513            | +0.293151 |
| +0.129092           | 636.2862 | +0.065266 | 1271.565 | 12  | A | 12 | 1524.652 |           | 1524.652            |           |
| +0.08903            | 679.8022 | +0.22208  | 1358.597 | 13  | S | 11 | 1453.615 | +0.15531  | 1453.615            |           |
|                     | 1518.628 | +0.058741 | 1518.628 | 14  | C | 10 | 1366.583 |           | 1366.583            |           |
|                     | 1699.642 |           | 1699.642 | 15  | T | 9  | 1206.553 |           | 1206.553            |           |
|                     | 1800.689 |           | 1800.689 | 16  | T | 8  | 1025.539 |           | 1025.539            |           |
|                     | 1914.732 |           | 1914.732 | 17  | N | 7  | 924.491  | +0.081126 | 462.7491            | -0.387239 |
|                     | 2074.763 |           | 2074.763 | 18  | C | 6  | 810.448  |           | 810.448             |           |
|                     | 2187.847 |           | 2187.847 | 19  | I | 5  | 650.4174 | +0.009683 | 650.4174            |           |
| -0.118845           | 1129.946 |           | 2258.884 | 20  | A | 4  | 537.3333 | +0.106747 | 537.3333            |           |
|                     | 2355.937 |           | 2355.937 | 21  | P | 3  | 466.2962 | +0.016236 | 466.2962            |           |
| +0.182138           | 1252.006 |           | 2503.005 | 22  | F | 2  | 369.2434 | +0.154449 | 369.2434            |           |
| -0.129876           | 1287.525 |           | 2574.043 | 23  | A | 1  | 222.175  |           | 222.175             |           |
|                     |          |           |          | 24  | K | 0  | 151.1379 |           | 151.1379            |           |

#### general information

|                       |             |
|-----------------------|-------------|
| Annotation:           | 15 of 24    |
| AminoAcids Coverage:  | 62 %        |
| Intensity Coverage:   | 27 %        |
| Protein Localisation: | 139 ... 162 |

Source: 201 20530\_VR\_Bsu\_TripleSILAC\_pWTPPrkCPrpC\_F05  
 Scannumber: 10343  
 Protein: BSU35070; yvmC  
 Peptide Score: 134.98  
 Method: ITMS; CID; 3

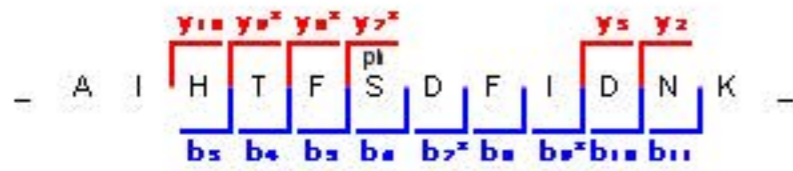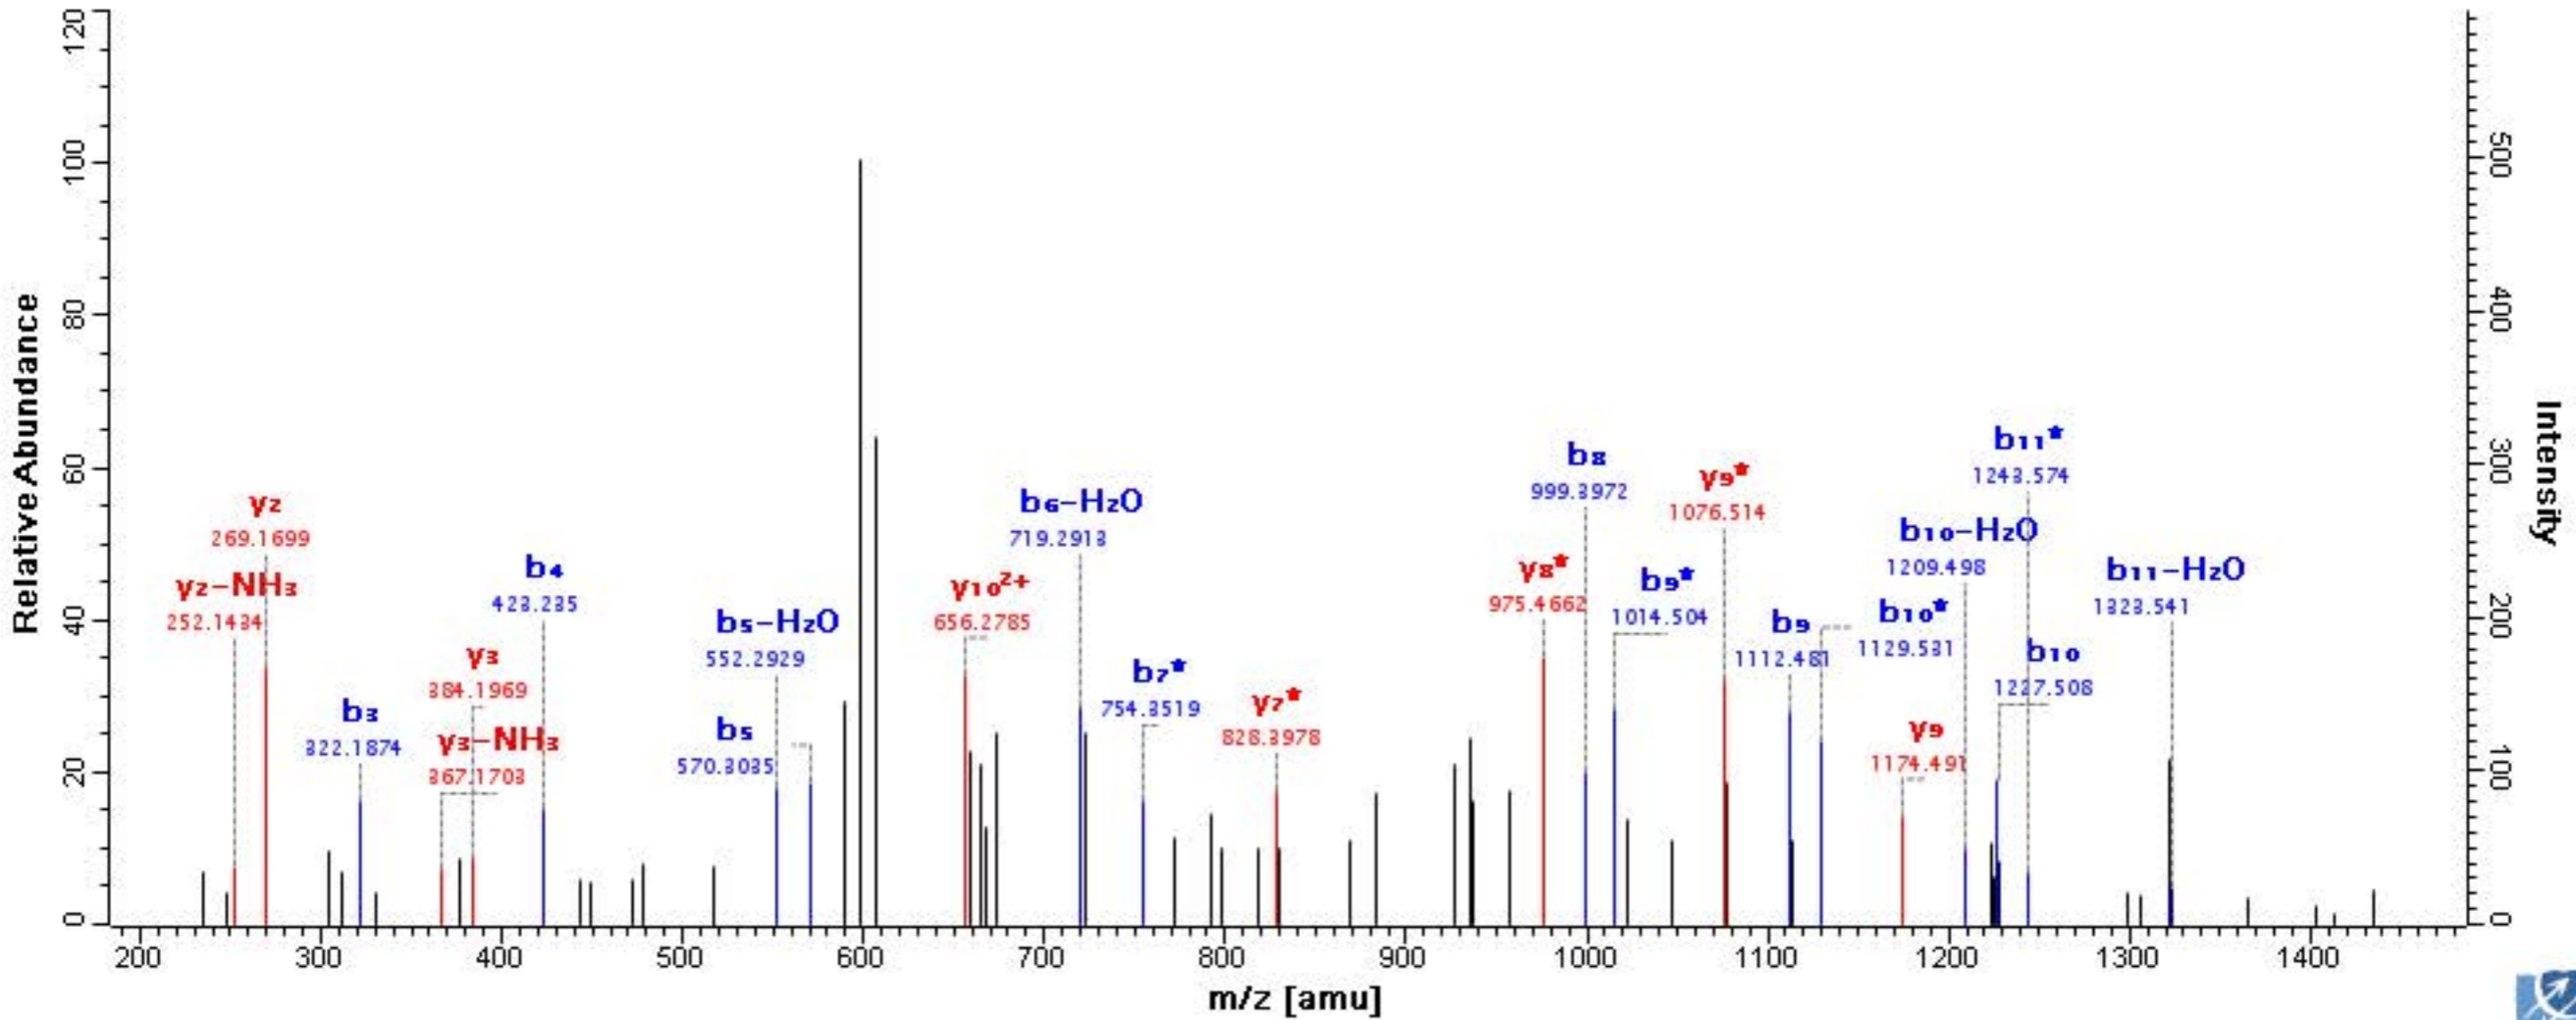

**precursor information**

|                   |                     |
|-------------------|---------------------|
| Mass:             | 1494.66404          |
| m/z:              | System.Collections. |
| Charge:           | System.Collections. |
| Retentiontime:    | System.Collections. |
| Score:            | 134.9769            |
| Mass Error [ppm]: | 0.32451             |
| PEP:              | 6.6698E-06          |
| Precursor Type:   | ISO                 |

**general information**

|                       |             |
|-----------------------|-------------|
| Annotation:           | 9 of 12     |
| AminoAcids Coverag    | 75 %        |
| Intensity Coverage:   | 39 %        |
| Protein Localisation: | 113 ... 124 |

| b ion      |              |    |     |    | y ion        |            | y <sup>2+</sup> ion |            |
|------------|--------------|----|-----|----|--------------|------------|---------------------|------------|
| Δ dalton   | mass         |    | seq |    | Δ dalton     | mass       | Δ dalton            | mass       |
|            | 72.044390254 | 1  | A   | 11 |              |            |                     |            |
|            | 185.12845423 | 2  | I   | 10 | 1424.6337214 |            | 1424.6337214        |            |
| +0.0806088 | 322.1873661  | 3  | H   | 9  | 1311.5496575 |            | 656.27846696        | +0.0884154 |
| -0.2403546 | 423.23504457 | 4  | T   | 8  | 1174.4907456 | -0.1649399 | 1174.4907456        |            |
| +0.0490806 | 570.30345849 | 5  | F   | 7  | 1073.4430671 |            | 1073.4430671        |            |
|            | 737.30181731 | 6  | S   | 6  | 926.37465321 |            | 926.37465321        |            |
|            | 852.32876034 | 7  | D   | 5  | 759.37629439 |            | 759.37629439        |            |
| +0.2013975 | 999.39717425 | 8  | F   | 4  | 644.34935136 |            | 644.34935136        |            |
| +0.1143428 | 1112.4812382 | 9  | I   | 3  | 497.28093744 |            | 497.28093744        |            |
| -0.3176295 | 1227.5081813 | 10 | D   | 2  | 384.19687346 | +0.2140152 | 384.19687346        |            |
|            | 1341.5511087 | 11 | N   | 1  | 269.16993043 | +0.0402441 | 269.16993043        |            |
|            |              | 12 | K   | 0  | 155.12700298 |            | 155.12700298        |            |

Source: 201 20530\_VR\_Bsu\_TripleSILAC\_pWTPPrkCPrpC\_F05  
 Scannumber: 10484  
 Protein: BSU17890; tkt; tktA  
 Peptide Score: 164.93  
 Method: ITMS; CID; 3

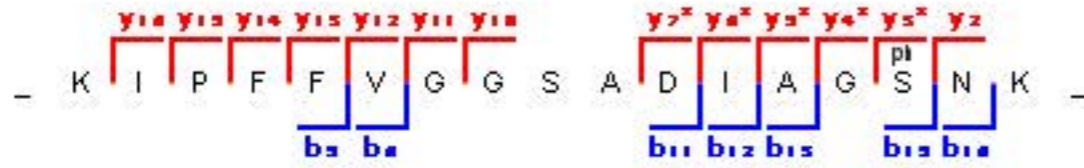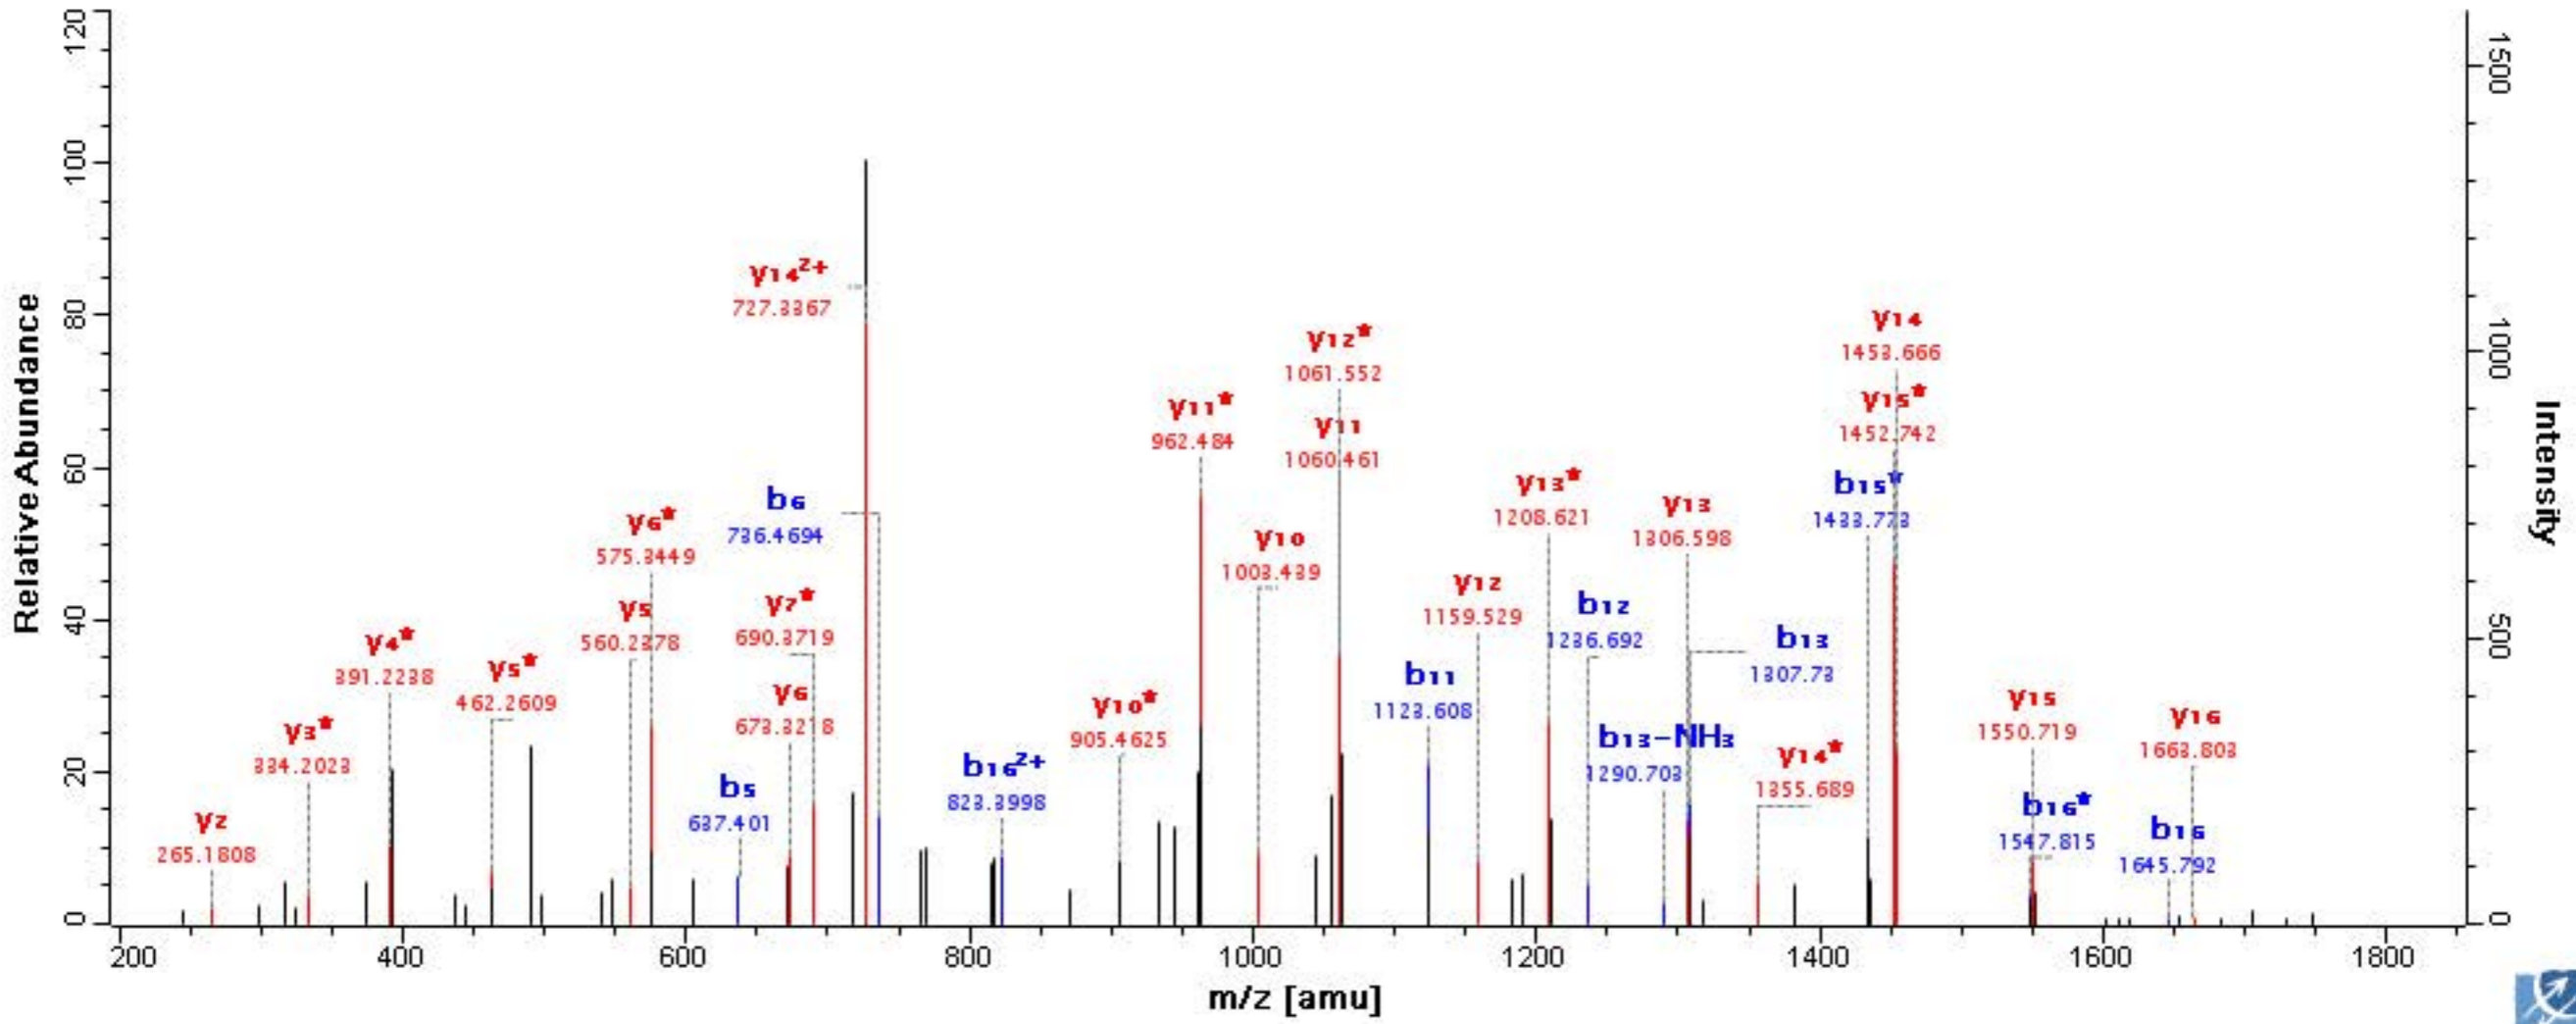

**precursor information**

|                   |                     |
|-------------------|---------------------|
| Mass:             | 1786.86625          |
| m/z:              | System.Collections. |
| Charge:           | System.Collections. |
| Retentiontime:    | System.Collections. |
| Score:            | 164.9298            |
| Mass Error [ppm]: | 0.41699             |
| PEP:              | 2.4551E-34          |
| Precursor Type:   | MULTI               |

| b <sup>2+</sup> ion |          | b ion     |          | seq |   |    | γ ion    |           | γ <sup>2+</sup> ion |          |
|---------------------|----------|-----------|----------|-----|---|----|----------|-----------|---------------------|----------|
| Δ dalton            | mass     | Δ dalton  | mass     |     |   |    | Δ dalton | mass      | Δ dalton            | mass     |
|                     | 133.1273 |           | 133.1273 | 1   | K | 16 |          |           |                     |          |
|                     | 246.2114 |           | 246.2114 | 2   | I | 15 | 1663.803 | +0.422909 | 1663.803            |          |
|                     | 343.2642 |           | 343.2642 | 3   | P | 14 | 1550.719 | +0.019302 | 1550.719            |          |
|                     | 490.3326 |           | 490.3326 | 4   | F | 13 | 1453.666 | +0.12834  | 727.3367            | +0.18895 |
|                     | 637.401  | -0.078614 | 637.401  | 5   | F | 12 | 1306.598 | +0.059669 | 1306.598            |          |
|                     | 736.4694 | -0.075983 | 736.4694 | 6   | V | 11 | 1159.529 | +0.073029 | 1159.529            |          |
|                     | 793.4909 |           | 793.4909 | 7   | G | 10 | 1060.461 | -0.05509  | 1060.461            |          |
|                     | 850.5123 |           | 850.5123 | 8   | G | 9  | 1003.439 | -0.115169 | 1003.439            |          |
|                     | 937.5444 |           | 937.5444 | 9   | S | 8  | 946.4179 |           | 946.4179            |          |
|                     | 1008.581 |           | 1008.581 | 10  | A | 7  | 859.3859 |           | 859.3859            |          |
|                     | 1123.608 | +0.1633   | 1123.608 | 11  | D | 6  | 788.3488 |           | 788.3488            |          |
|                     | 1236.692 | +0.252576 | 1236.692 | 12  | I | 5  | 673.3218 | -0.047547 | 673.3218            |          |
|                     | 1307.73  | +0.023201 | 1307.73  | 13  | A | 4  | 560.2378 | -0.03819  | 560.2378            |          |
|                     | 1364.751 |           | 1364.751 | 14  | G | 3  | 489.2007 |           | 489.2007            |          |
|                     | 1531.749 |           | 1531.749 | 15  | S | 2  | 432.1792 |           | 432.1792            |          |
| -0.121557           | 823.3998 | -0.04492  | 1645.792 | 16  | N | 1  | 265.1808 | -0.05178  | 265.1808            |          |
|                     |          |           |          | 17  | K | 0  | 151.1379 |           | 151.1379            |          |

**general information**

|                       |             |
|-----------------------|-------------|
| Annotation:           | 13 of 17    |
| AminoAcids Coverag    | 76 %        |
| Intensity Coverage:   | 49 %        |
| Protein Localisation: | 370 ... 386 |

Source: 20120530\_VR\_Bsu\_TripleSILAC\_pWTPPrkCPrpC\_F05  
 Scannumber: 11550  
 Protein: BSU28280; leuA  
 Peptide Score: 77.51  
 Method: ITMS; CID; 3

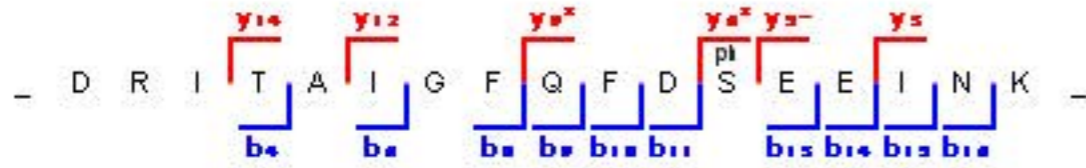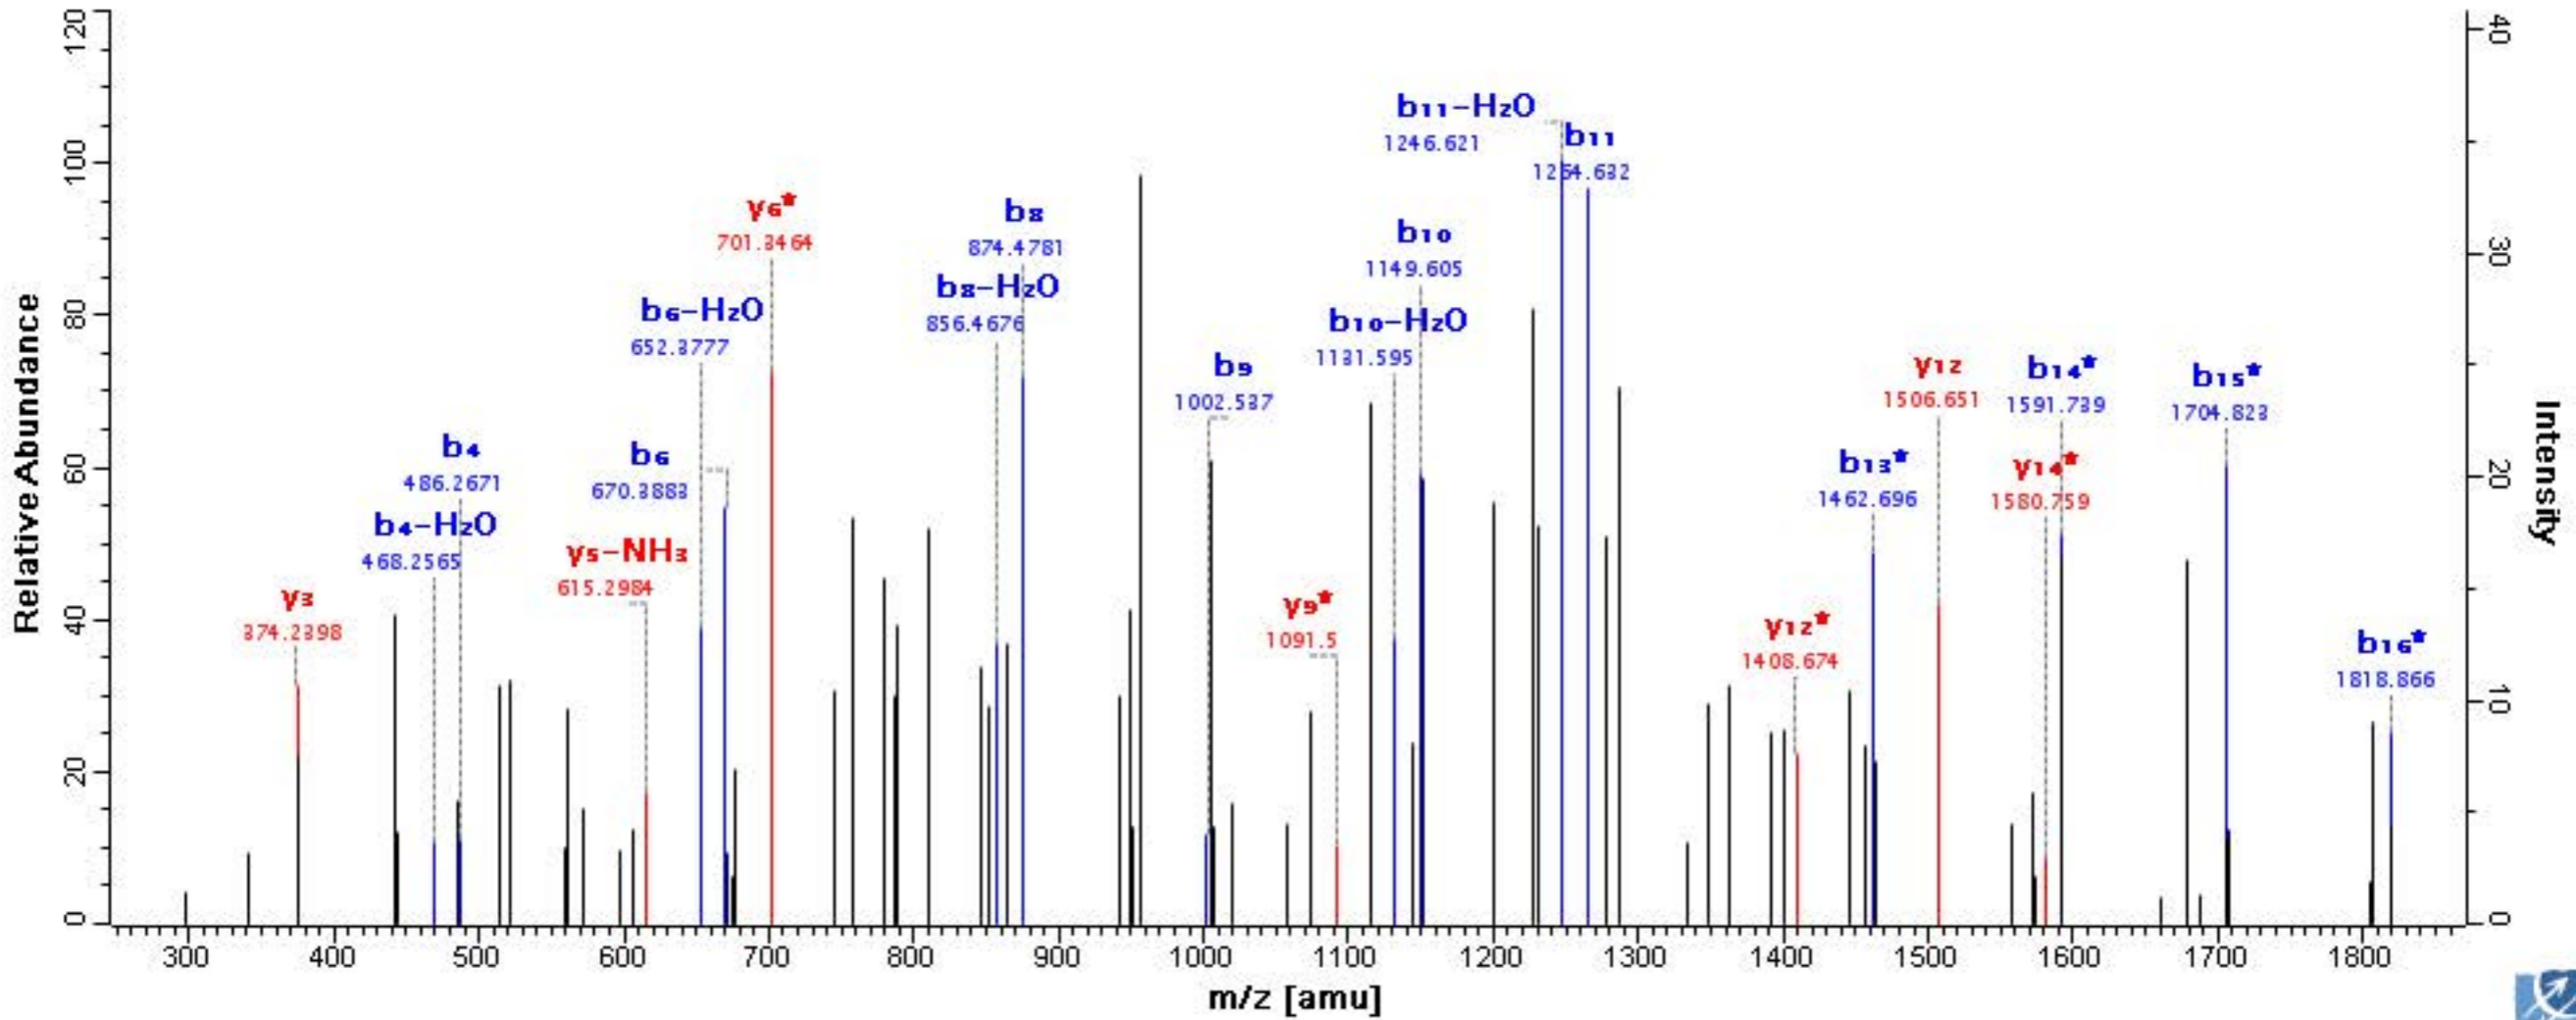

#### precursor information

|                   |                     |
|-------------------|---------------------|
| Mass:             | 2061.94066          |
| m/z:              | System.Collections. |
| Charge:           | System.Collections. |
| Retentiontime:    | System.Collections. |
| Score:            | 77.50517            |
| Mass Error [ppm]: | -0.09198            |
| PEP:              | 0.00019063          |
| Precursor Type:   | MULTI               |

#### general information

|                       |             |
|-----------------------|-------------|
| Annotation:           | 11 of 17    |
| AminoAcids Coverag    | 65 %        |
| Intensity Coverage:   | 33 %        |
| Protein Localisation: | 338 ... 354 |

| b ion      |                |    |     |    | y ion          |            |
|------------|----------------|----|-----|----|----------------|------------|
| Δ dalton   | mass           |    | seq |    | Δ dalton       | mass       |
|            | 116.034219499  | 1  | D   | 16 |                |            |
|            | 272.135330527  | 2  | R   | 15 | 1947.921183959 |            |
|            | 385.219394507  | 3  | I   | 14 | 1791.820072931 |            |
| +0.211992  | 486.267072981  | 4  | T   | 13 | 1678.736008951 |            |
|            | 557.304186769  | 5  | A   | 12 | 1577.688330477 |            |
| -0.0164856 | 670.388250749  | 6  | I   | 11 | 1506.651216689 | +0.0574015 |
|            | 727.409714473  | 7  | G   | 10 | 1393.567152708 |            |
| +0.0128384 | 874.478128389  | 8  | F   | 9  | 1336.545688985 |            |
| -0.259118  | 1002.536705901 | 9  | Q   | 8  | 1189.477275069 |            |
| +0.1719798 | 1149.605119817 | 10 | F   | 7  | 1061.418697557 |            |
| +0.166277  | 1264.632062849 | 11 | D   | 6  | 914.350283641  |            |
|            | 1431.630421667 | 12 | S   | 5  | 799.323340609  |            |
|            | 1560.673014763 | 13 | E   | 4  | 632.324981791  |            |
|            | 1689.71560786  | 14 | E   | 3  | 503.282388694  |            |
|            | 1802.79967184  | 15 | I   | 2  | 374.239795598  | +0.1665154 |
|            | 1916.842599287 | 16 | N   | 1  | 261.155731618  |            |
|            |                | 17 | K   | 0  | 147.112804171  |            |

Source: 20120530\_VR\_Bsu\_TripleSILAC\_pWTPPrkCPrpC\_F05  
 Scannumber: 12031  
 Protein: BSU06520; purH; purHJ  
 Peptide Score: 142.78  
 Method: ITMS; CID; 3

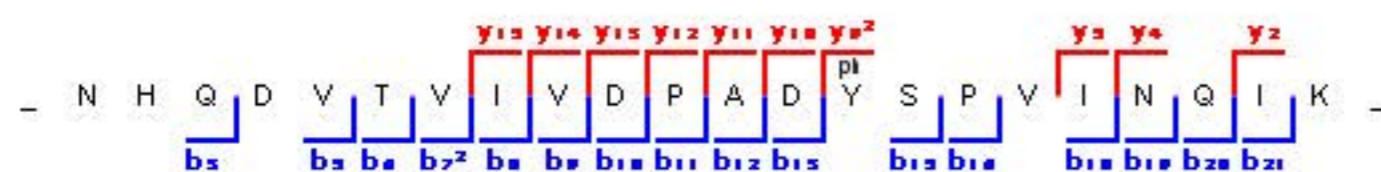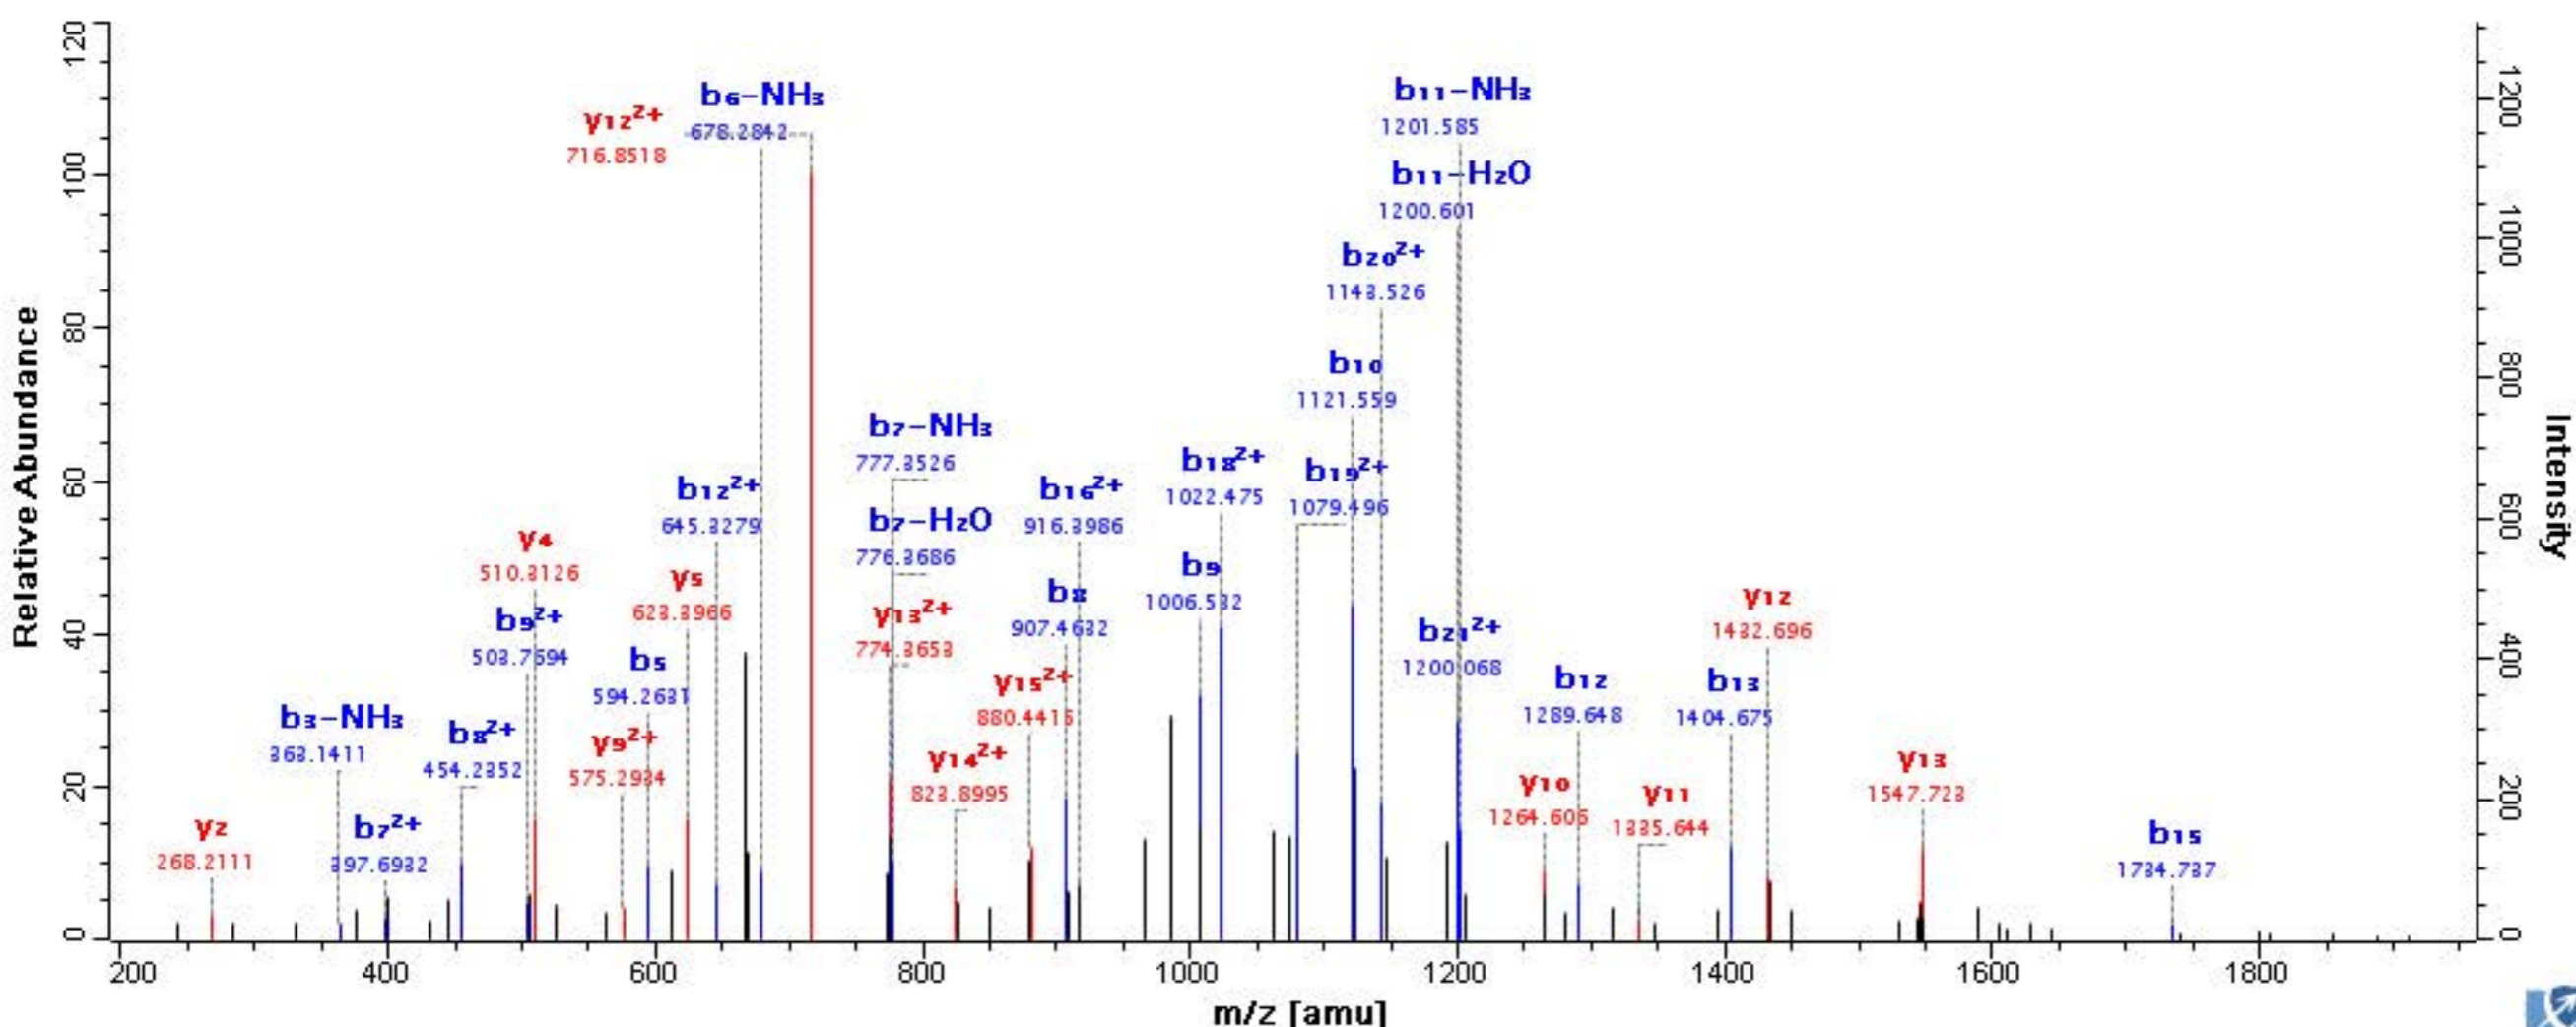

#### precursor information

|                   |                     |
|-------------------|---------------------|
| Mass:             | 2544.2258           |
| m/z:              | System.Collections. |
| Charge:           | System.Collections. |
| Retentiontime:    | System.Collections. |
| Score:            | 142.7823            |
| Mass Error [ppm]: | -0.13215            |
| PEP:              | 1.2532E-33          |
| Precursor Type:   | MULTI               |

| b <sup>2+</sup> ion |          | b ion     |          |     | γ ion |          | γ <sup>2+</sup> ion |           |                    |
|---------------------|----------|-----------|----------|-----|-------|----------|---------------------|-----------|--------------------|
| Δ dalton            | mass     | Δ dalton  | mass     | seq |       | Δ dalton | mass                | Δ dalton  | mass               |
|                     | 115.0502 |           | 115.0502 | 1   | N     | 21       |                     |           |                    |
|                     | 252.1091 |           | 252.1091 | 2   | H     | 20       | 2439.205            |           | 2439.205           |
|                     | 380.1677 |           | 380.1677 | 3   | Q     | 19       | 2302.146            |           | 2302.146           |
|                     | 495.1946 |           | 495.1946 | 4   | D     | 18       | 2174.087            |           | 2174.087           |
|                     | 594.2631 | -0.09441  | 594.2631 | 5   | V     | 17       | 2059.06             |           | 2059.06            |
|                     | 695.3107 |           | 695.3107 | 6   | T     | 16       | 1959.992            |           | 1959.992           |
| -0.132235           | 397.6932 |           | 794.3791 | 7   | V     | 15       | 1858.944            |           | 1858.944           |
| +0.19115            | 454.2352 | +0.123524 | 907.4632 | 8   | I     | 14       | 1759.876            |           | 880.4415 +0.1086   |
| +0.180991           | 503.7694 | -0.050663 | 1006.532 | 9   | V     | 13       | 1646.792            |           | 823.8995 -0.140811 |
|                     | 1121.559 | -0.040741 | 1121.559 | 10  | D     | 12       | 1547.723            | +0.141359 | 774.3653 +0.160242 |
|                     | 1218.611 |           | 1218.611 | 11  | P     | 11       | 1432.696            | +0.024137 | 716.8518 +0.055489 |
| -0.328286           | 645.3279 | +0.037228 | 1289.648 | 12  | A     | 10       | 1335.644            | +0.136838 | 1335.644           |
|                     | 1404.675 | -0.001068 | 1404.675 | 13  | D     | 9        | 1264.606            | +0.053346 | 1264.606           |
|                     | 1647.705 |           | 1647.705 | 14  | Y     | 8        | 1149.58             |           | 575.2934 +0.381965 |
|                     | 1734.737 | -0.172496 | 1734.737 | 15  | S     | 7        | 906.5498            |           | 906.5498           |
| +0.002811           | 916.3986 |           | 1831.79  | 16  | P     | 6        | 819.5178            |           | 819.5178           |
|                     | 1930.858 |           | 1930.858 | 17  | V     | 5        | 722.465             |           | 722.465            |
| +0.294553           | 1022.475 |           | 2043.942 | 18  | I     | 4        | 623.3966            | -0.005645 | 623.3966           |
| +0.246173           | 1079.496 |           | 2157.985 | 19  | N     | 3        | 510.3126            | +0.03838  | 510.3126           |
| +0.328334           | 1143.526 |           | 2286.044 | 20  | Q     | 2        | 396.2696            |           | 396.2696           |
| -0.034498           | 1200.068 |           | 2399.128 | 21  | I     | 1        | 268.2111            | +0.083824 | 268.2111           |
|                     |          |           |          | 22  | K     | 0        | 155.127             |           | 155.127            |

#### general information

|                       |             |
|-----------------------|-------------|
| Annotation:           | 17 of 22    |
| AminoAcids Coverag    | 77 %        |
| Intensity Coverage:   | 60 %        |
| Protein Localisation: | 138 ... 159 |

Source: 201 20530\_VR\_Bsu\_TripleSILAC\_pWTPPrkCPrpC\_F05  
 Scannumber: 13136  
 Protein: BSU15430; ile5  
 Peptide Score: 109.72  
 Method: ITMS; CID; 3

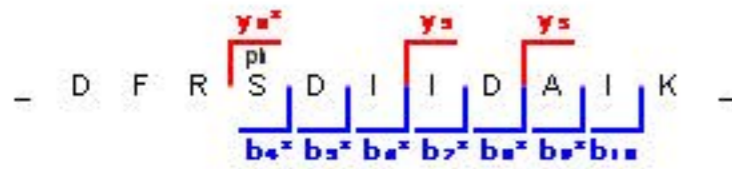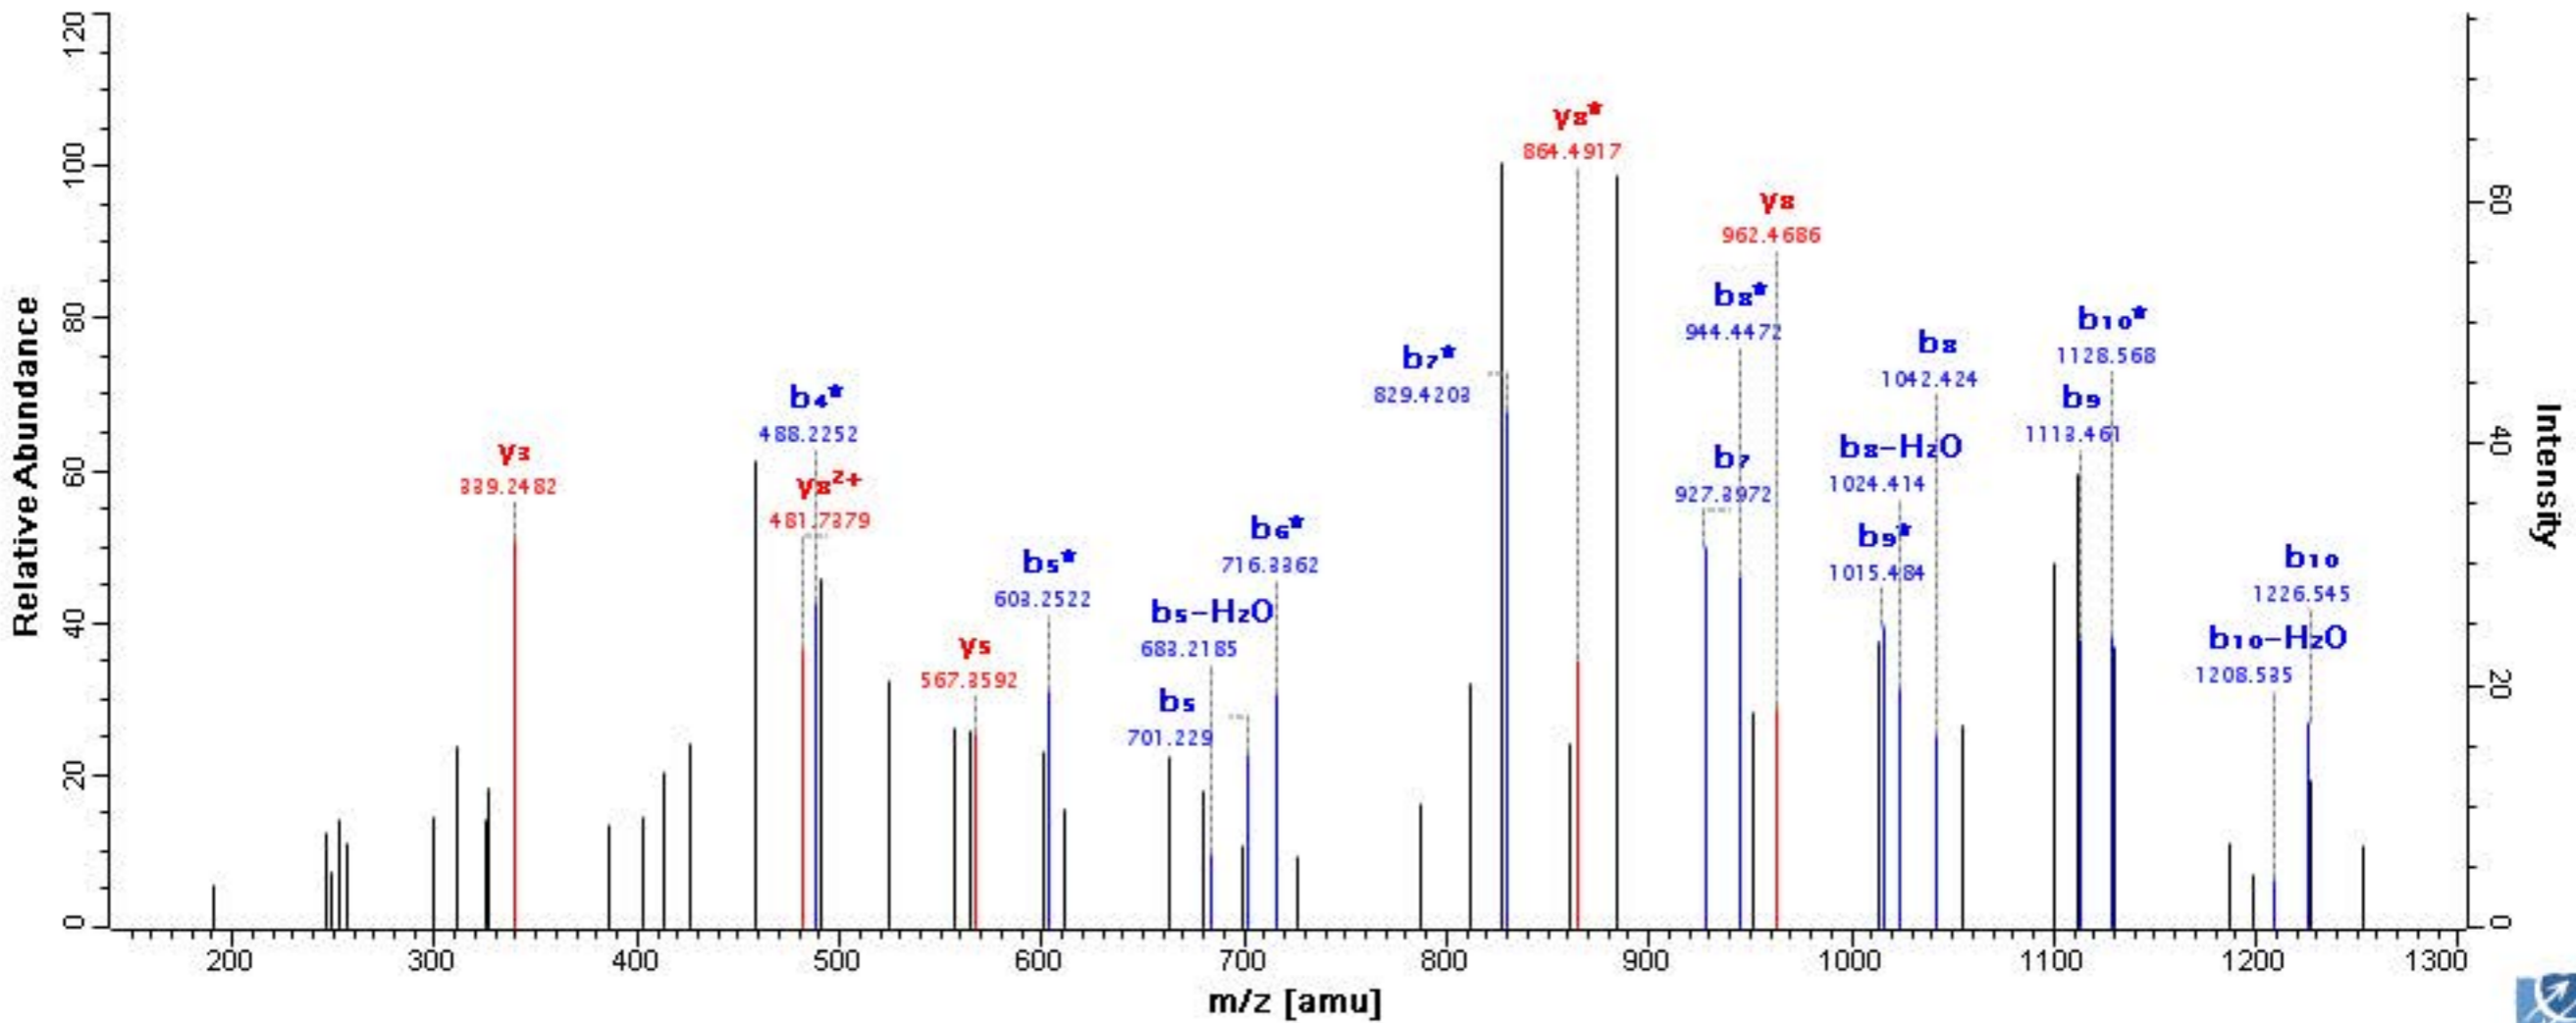

#### precursor information

|                   |                     |
|-------------------|---------------------|
| Mass:             | 1371.64327          |
| m/z:              | System.Collections. |
| Charge:           | System.Collections. |
| Retentiontime:    | System.Collections. |
| Score:            | 109.7213            |
| Mass Error [ppm]: | -0.20238            |
| PEP:              | 5.6505E-05          |
| Precursor Type:   | MULTI               |

#### general information

|                       |             |
|-----------------------|-------------|
| Annotation:           | 7 of 11     |
| AminoAcids Coverag    | 64 %        |
| Intensity Coverage:   | 40 %        |
| Protein Localisation: | 417 ... 427 |

| b ion      |              |    |     |    | γ ion        |            |              | γ <sup>2+</sup> ion |  |
|------------|--------------|----|-----|----|--------------|------------|--------------|---------------------|--|
| Δ dalton   | mass         |    | seq |    | Δ dalton     | mass       | Δ dalton     | mass                |  |
|            | 116.0342195  | 1  | D   | 10 |              |            |              |                     |  |
|            | 263.10263341 | 2  | F   | 9  | 1265.6380785 |            | 1265.6380785 |                     |  |
|            | 419.20374444 | 3  | R   | 8  | 1118.5696646 |            | 1118.5696646 |                     |  |
|            | 586.20210326 | 4  | S   | 7  | 962.4685536  | +0.0802745 | 481.73791503 | +0.2752686          |  |
| +0.0437198 | 701.22904629 | 5  | D   | 6  | 795.47019478 |            | 795.47019478 |                     |  |
|            | 814.31311027 | 6  | I   | 5  | 680.44325174 |            | 680.44325174 |                     |  |
| +0.1999937 | 927.39717425 | 7  | I   | 4  | 567.35918776 | -0.1655232 | 567.35918776 |                     |  |
| -0.0483849 | 1042.4241173 | 8  | D   | 3  | 454.27512378 |            | 454.27512378 |                     |  |
| -0.0205572 | 1113.4612311 | 9  | A   | 2  | 339.24818075 | +0.1699101 | 339.24818075 |                     |  |
| -0.2667306 | 1226.5452951 | 10 | I   | 1  | 268.21106696 |            | 268.21106696 |                     |  |
|            |              | 11 | K   | 0  | 155.12700298 |            | 155.12700298 |                     |  |



Source: 201 20530\_VR\_Bsu\_TripleSILAC\_pWTPPrkCPrpC\_F05  
 Scannumber: 2900  
 Protein: BSU28290; ilvC  
 Peptide Score: 194.17  
 Method: ITMS; CID; 3

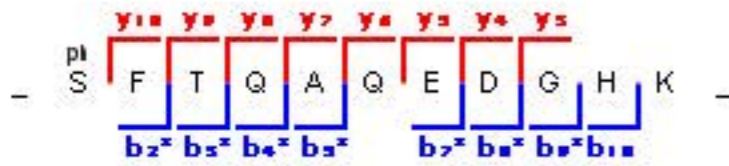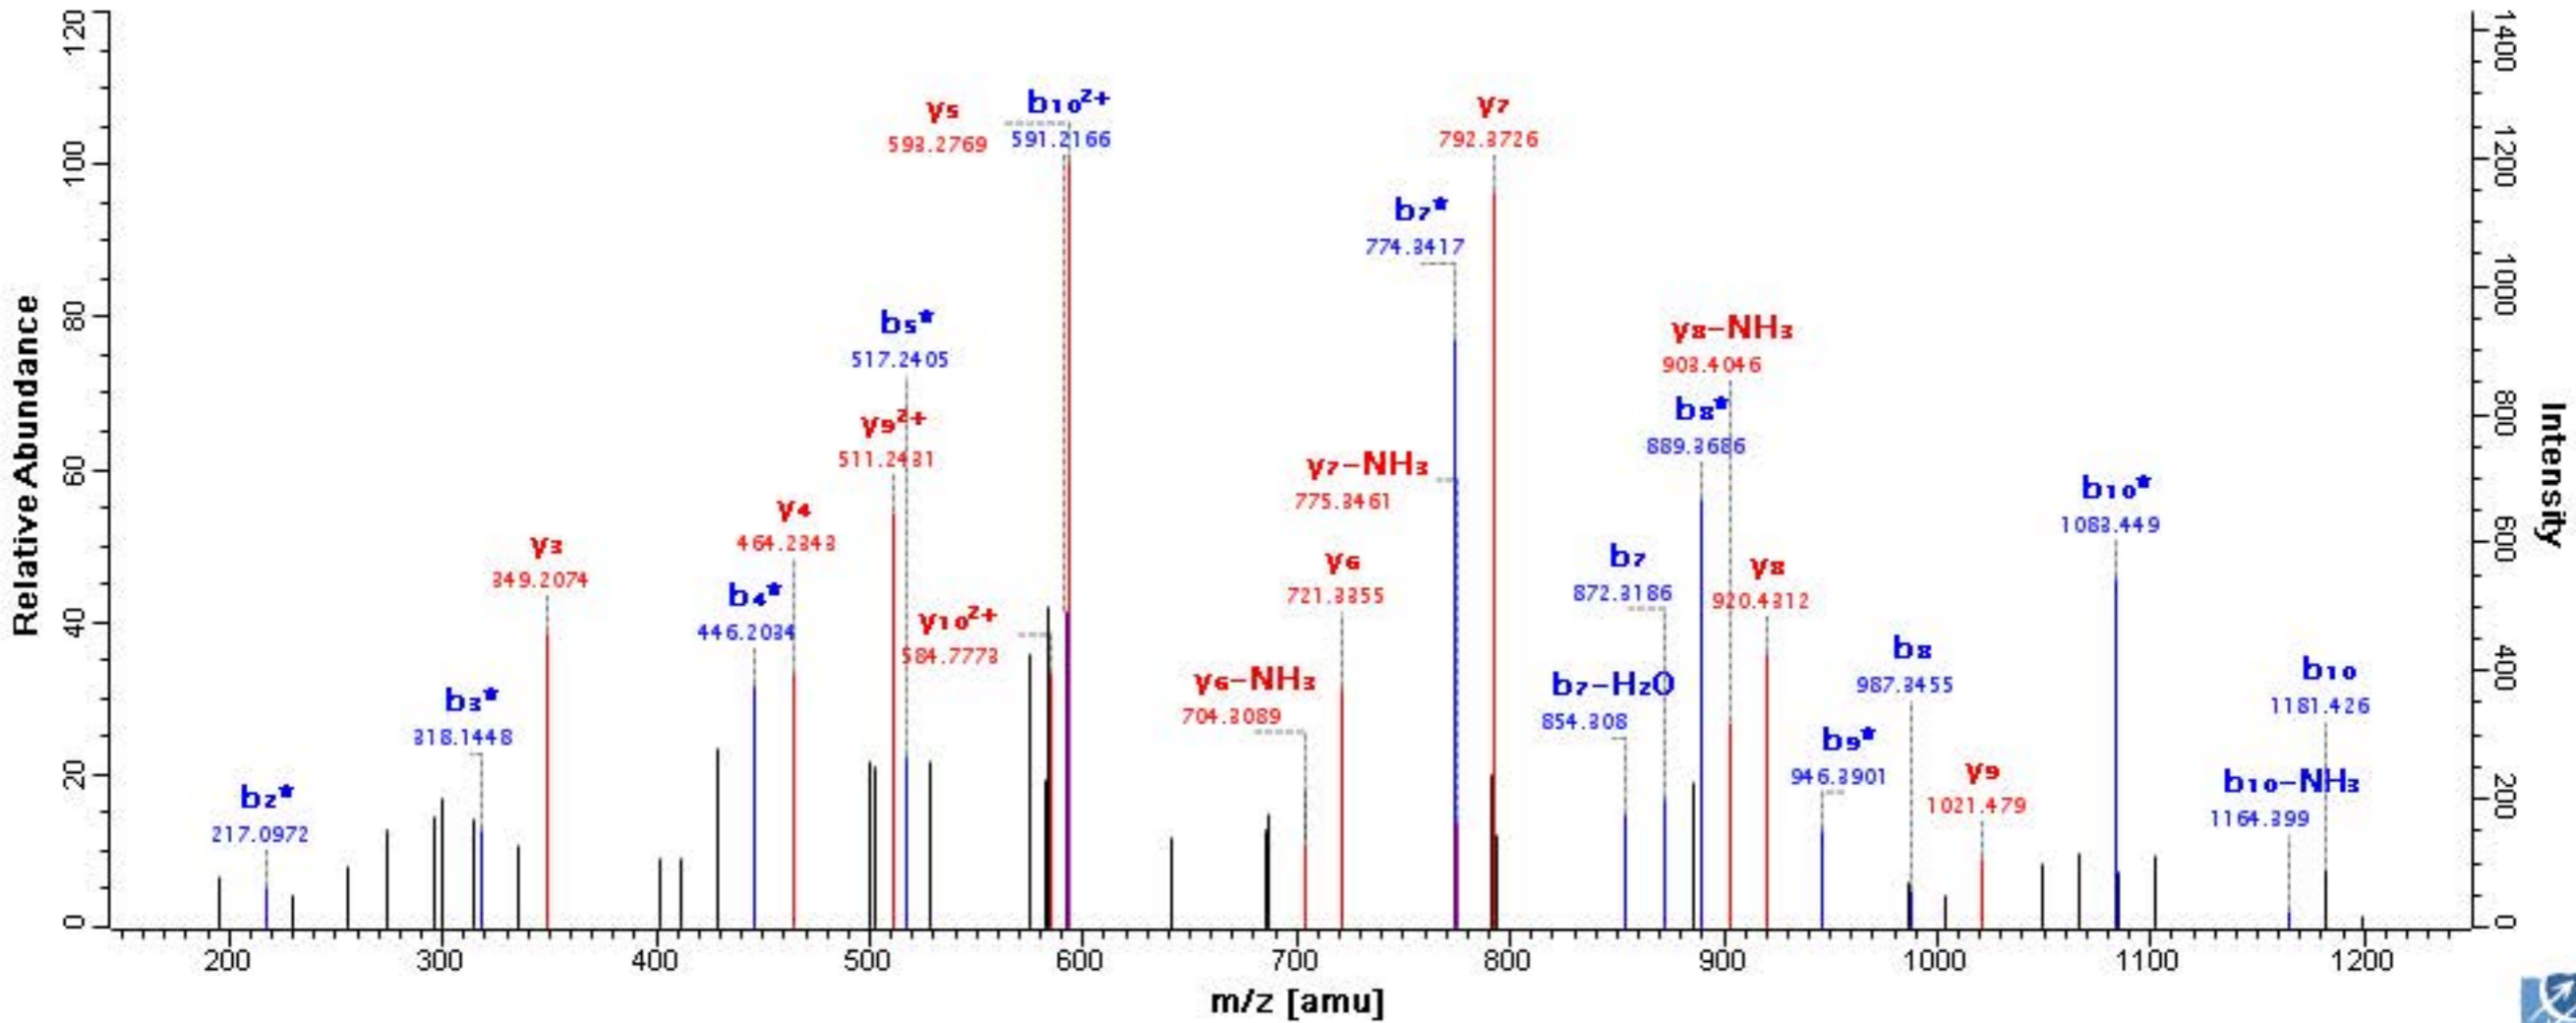

#### precursor information

|                   |                     |
|-------------------|---------------------|
| Mass:             | 1326.52417          |
| m/z:              | System.Collections. |
| Charge:           | System.Collections. |
| Retentiontime:    | System.Collections. |
| Score:            | 194.1653            |
| Mass Error [ppm]: | 0.0044655           |
| PEP:              | 9.6528E-39          |
| Precursor Type:   | MULTI               |

#### general information

|                       |           |
|-----------------------|-----------|
| Annotation:           | 9 of 11   |
| AminoAcids Coverag    | 82 %      |
| Intensity Coverage:   | 64 %      |
| Protein Localisation: | 52 ... 62 |

| $\text{b}^{2+}$ ion |          | b ion           |          |    | seq |    | $\text{y}$ ion  |           | $\text{y}^{2+}$ ion |           |
|---------------------|----------|-----------------|----------|----|-----|----|-----------------|-----------|---------------------|-----------|
| $\Delta$ dalton     | mass     | $\Delta$ dalton | mass     |    |     |    | $\Delta$ dalton | mass      | $\Delta$ dalton     | mass      |
|                     | 168.0056 |                 | 168.0056 | 1  | S   | 10 |                 |           |                     |           |
|                     | 315.074  |                 | 315.074  | 2  | F   | 9  | 1168.547        |           | 584.7773            | +0.119269 |
|                     | 416.1217 |                 | 416.1217 | 3  | T   | 8  | 1021.479        | +0.136433 | 511.2431            | +0.010776 |
|                     | 544.1803 |                 | 544.1803 | 4  | Q   | 7  | 920.4312        | +0.06314  | 920.4312            |           |
|                     | 615.2174 |                 | 615.2174 | 5  | A   | 6  | 792.3726        | +0.102064 | 792.3726            |           |
|                     | 743.276  |                 | 743.276  | 6  | Q   | 5  | 721.3355        | +0.016131 | 721.3355            |           |
|                     | 872.3186 | +0.044509       | 872.3186 | 7  | E   | 4  | 593.2769        | -0.428221 | 593.2769            |           |
|                     | 987.3455 | +0.230334       | 987.3455 | 8  | D   | 3  | 464.2343        | +0.061699 | 464.2343            |           |
|                     | 1044.367 |                 | 1044.367 | 9  | G   | 2  | 349.2074        | +0.072346 | 349.2074            |           |
| +0.492941           | 591.2166 | +0.109126       | 1181.426 | 10 | H   | 1  | 292.1859        |           | 292.1859            |           |
|                     |          |                 |          | 11 | K   | 0  | 155.127         |           | 155.127             |           |

Source: 201 20530\_VR\_Bsu\_TripleSILAC\_pWTPPrkCPrpC\_F05  
 Scannumber: 3009  
 Protein: BSU22880; jofD; ypfD  
 Peptide Score: 111.94  
 Method: ITMS; CID; 3

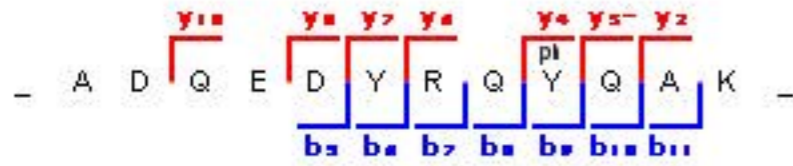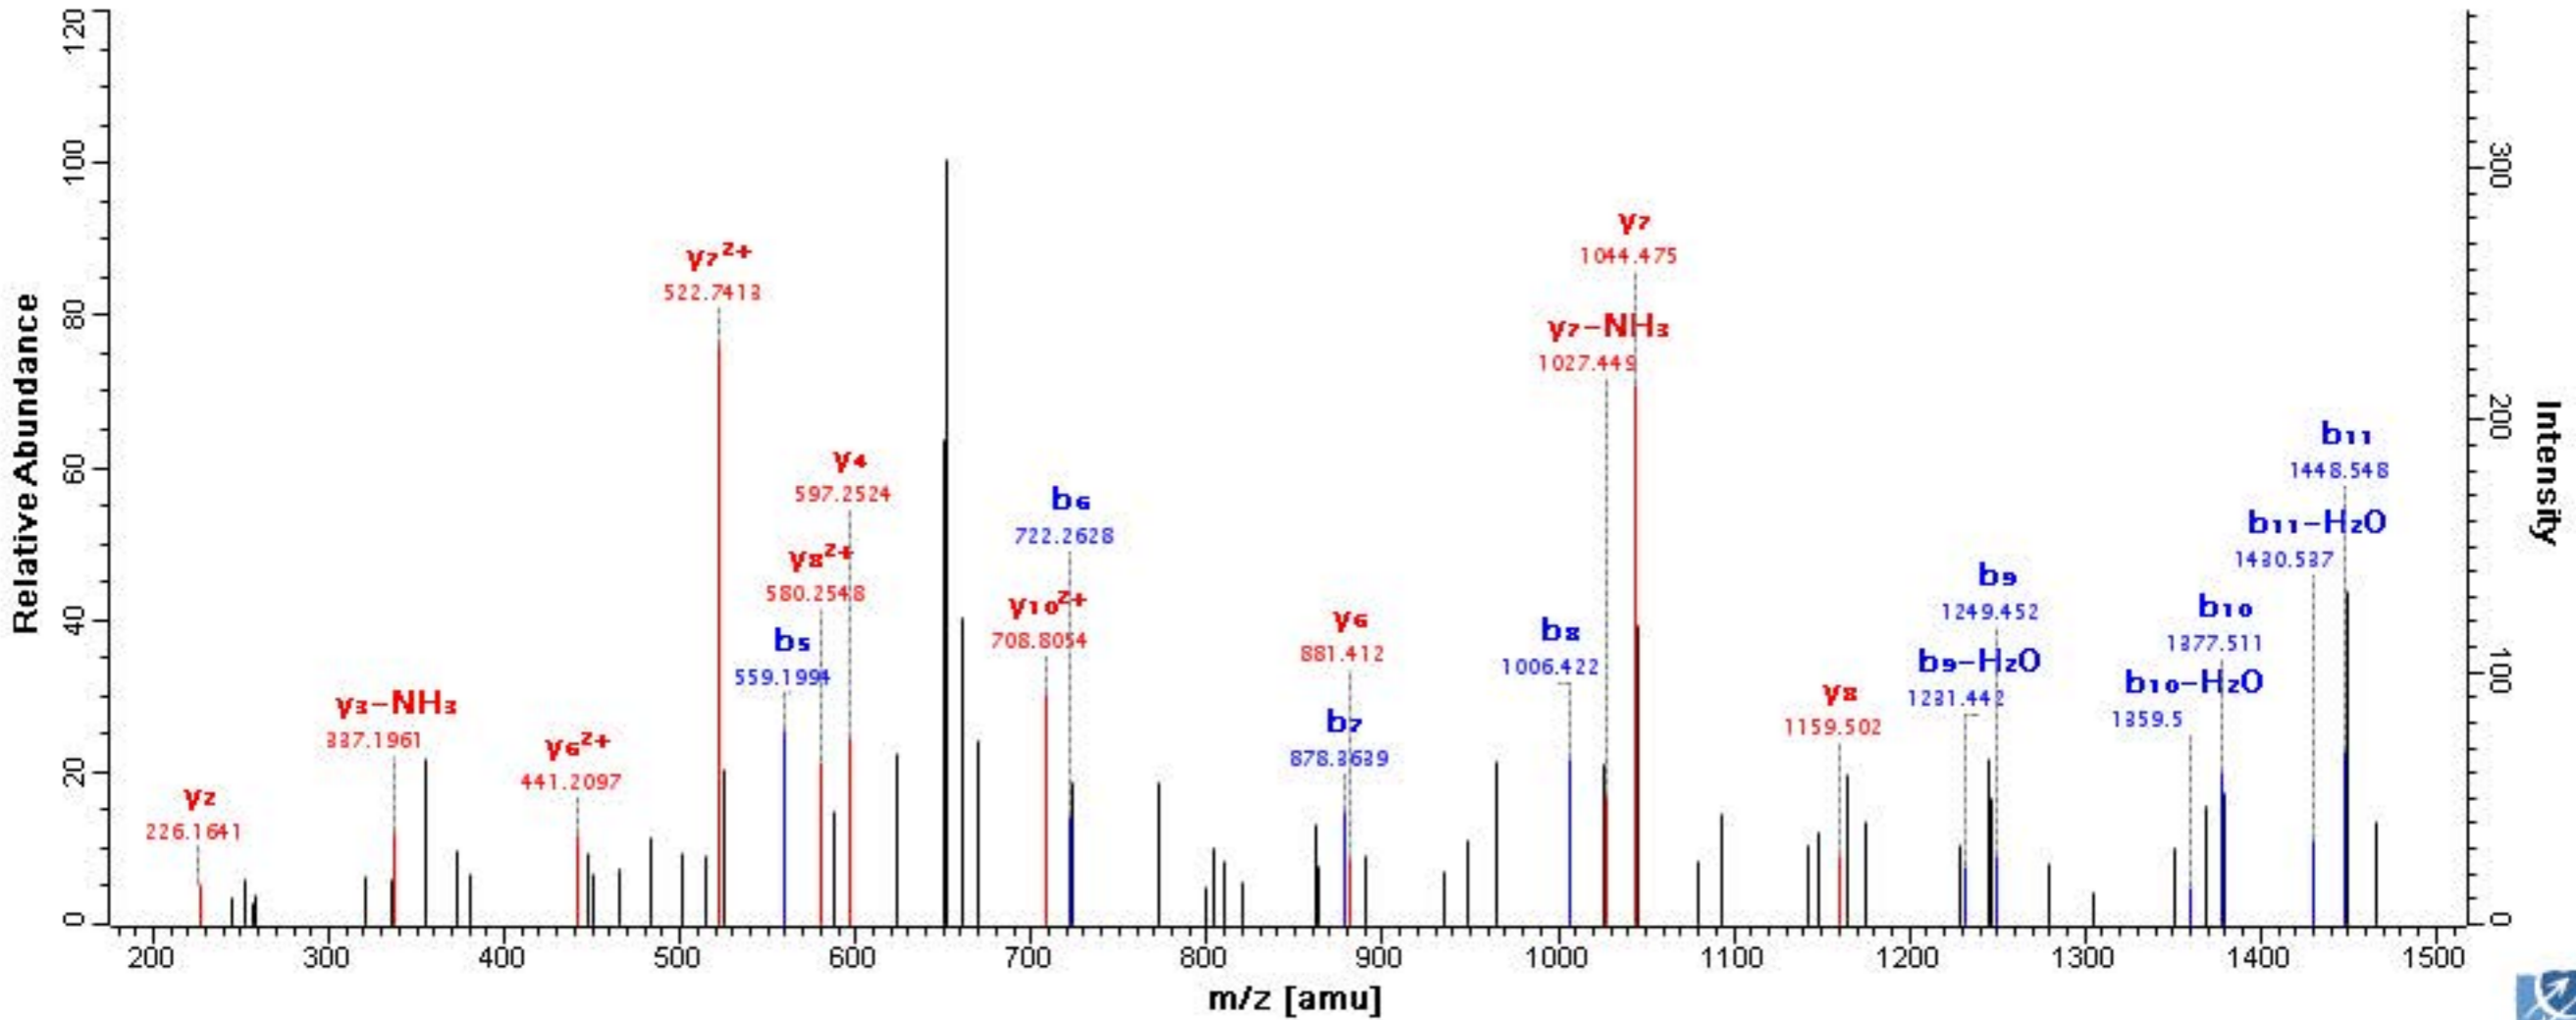

**precursor information**

|                   |                     |
|-------------------|---------------------|
| Mass:             | 1593.64581          |
| m/z:              | System.Collections. |
| Charge:           | System.Collections. |
| Retentiontime:    | System.Collections. |
| Score:            | 111.9361            |
| Mass Error [ppm]: | -0.15891            |
| PEP:              | 7.106E-07           |
| Precursor Type:   | MULTI               |

**general information**

|                       |             |
|-----------------------|-------------|
| Annotation:           | 8 of 12     |
| AminoAcids Coverag    | 67 %        |
| Intensity Coverage:   | 34 %        |
| Protein Localisation: | 350 ... 361 |

| b ion      |              |    |     |    | y ion        |            | y <sup>2+</sup> ion |            |
|------------|--------------|----|-----|----|--------------|------------|---------------------|------------|
| Δ dalton   | mass         |    | seq |    | Δ dalton     | mass       | Δ dalton            | mass       |
|            | 72.044390254 | 1  | A   | 11 |              |            |                     |            |
|            | 187.07133329 | 2  | D   | 10 | 1531.630427  |            | 1531.630427         |            |
|            | 315.1299108  | 3  | Q   | 9  | 1416.6034839 |            | 708.80538021        | -0.2172454 |
|            | 444.17250389 | 4  | E   | 8  | 1288.5449064 |            | 1288.5449064        |            |
| +0.0413368 | 559.19944693 | 5  | D   | 7  | 1159.5023133 | +0.2733214 | 580.2547949         | +0.0946314 |
| +0.1988334 | 722.26277546 | 6  | Y   | 6  | 1044.4753703 | +0.1311971 | 522.74132339        | +0.1156712 |
| +0.1948293 | 878.36388649 | 7  | R   | 5  | 881.41204177 | +0.1029118 | 441.20965912        | +0.0168423 |
| +0.1949066 | 1006.422464  | 8  | Q   | 4  | 725.31093074 |            | 725.31093074        |            |
| +0.4428966 | 1249.452123  | 9  | Y   | 3  | 597.25235323 | +0.1488309 | 597.25235323        |            |
| -0.049763  | 1377.5107005 | 10 | Q   | 2  | 354.22269428 |            | 354.22269428        |            |
| +0.0591193 | 1448.5478142 | 11 | A   | 1  | 226.16411677 | +0.0943519 | 226.16411677        |            |
|            |              | 12 | K   | 0  | 155.12700298 |            | 155.12700298        |            |

Source: 201 20530\_VR\_Bsu\_TripleSILAC\_pWTPPrkCPrpC\_F05  
 Scannumber: 3502  
 Protein: BSU29840; ytpP  
 Peptide Score: 83.08  
 Method: ITMS; CID; 3

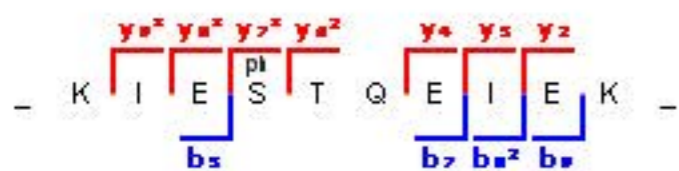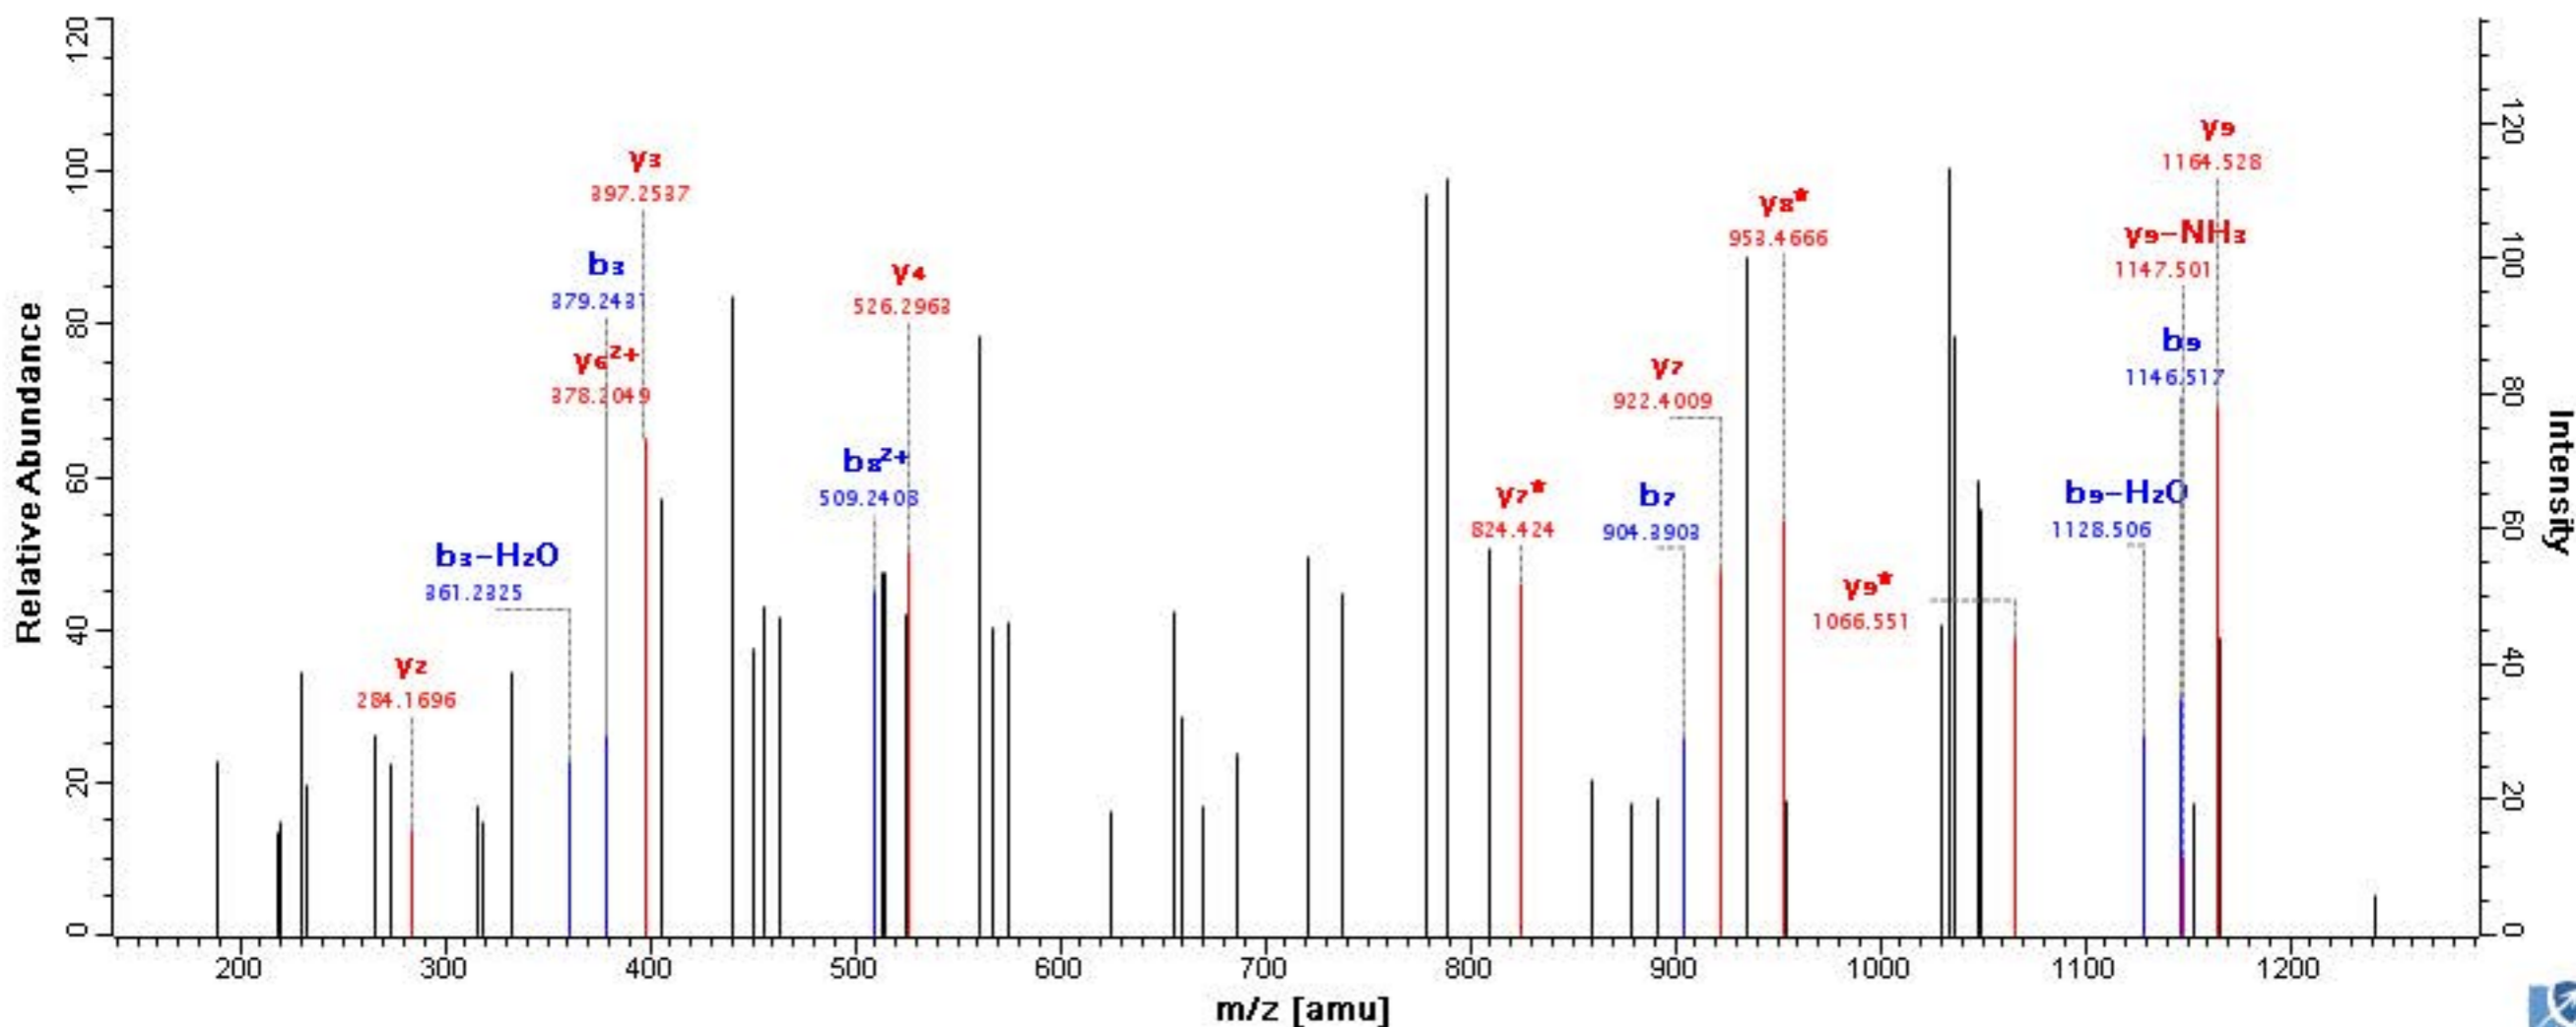

#### precursor information

|                   |                     |
|-------------------|---------------------|
| Mass:             | 1283.59863          |
| m/z:              | System.Collections. |
| Charge:           | System.Collections. |
| Retentiontime:    | System.Collections. |
| Score:            | 83.08141            |
| Mass Error [ppm]: | -1.8346             |
| PEP:              | 0.005258            |
| Precursor Type:   | MULTI               |

#### general information

|                       |          |
|-----------------------|----------|
| Annotation:           | 7 of 10  |
| AminoAcids Coverage:  | 70 %     |
| Intensity Coverage:   | 24 %     |
| Protein Localisation: | 3 ... 12 |

| b <sup>2+</sup> ion |          | b ion     |          |     | y ion |          | y <sup>2+</sup> ion |           |          |           |
|---------------------|----------|-----------|----------|-----|-------|----------|---------------------|-----------|----------|-----------|
| Δ dalton            | mass     | Δ dalton  | mass     | seq |       | Δ dalton | mass                | Δ dalton  | mass     |           |
|                     | 137.1164 |           | 137.1164 | 1   | K     | 9        |                     |           |          |           |
|                     | 250.2005 |           | 250.2005 | 2   | I     | 8        | 1164.528            | +0.051821 | 1164.528 |           |
|                     | 379.2431 | -0.036797 | 379.2431 | 3   | E     | 7        | 1051.443            |           | 1051.443 |           |
|                     | 546.2415 |           | 546.2415 | 4   | S     | 6        | 922.4009            | +0.008556 | 922.4009 |           |
|                     | 647.2891 |           | 647.2891 | 5   | T     | 5        | 755.4025            |           | 378.2049 | +0.266665 |
|                     | 775.3477 |           | 775.3477 | 6   | Q     | 4        | 654.3548            |           | 654.3548 |           |
|                     | 904.3903 | +0.045183 | 904.3903 | 7   | E     | 3        | 526.2963            | +0.046642 | 526.2963 |           |
| +0.456993           | 509.2408 |           | 1017.474 | 8   | I     | 2        | 397.2537            | +0.145144 | 397.2537 |           |
|                     | 1146.517 | -0.109123 | 1146.517 | 9   | E     | 1        | 284.1696            | -0.1439   | 284.1696 |           |
|                     |          |           |          | 10  | K     | 0        | 155.127             |           | 155.127  |           |

Source: 20120530\_VR\_Bsu\_TripleSILAC\_pWTPPrkCPrpC\_F05  
 Scannumber: 3918  
 Protein: BSU06840; yeel  
 Peptide Score: 75.82  
 Method: ITMS; CID; 3

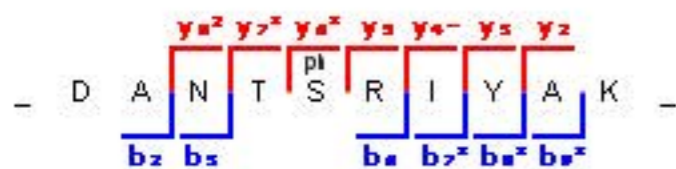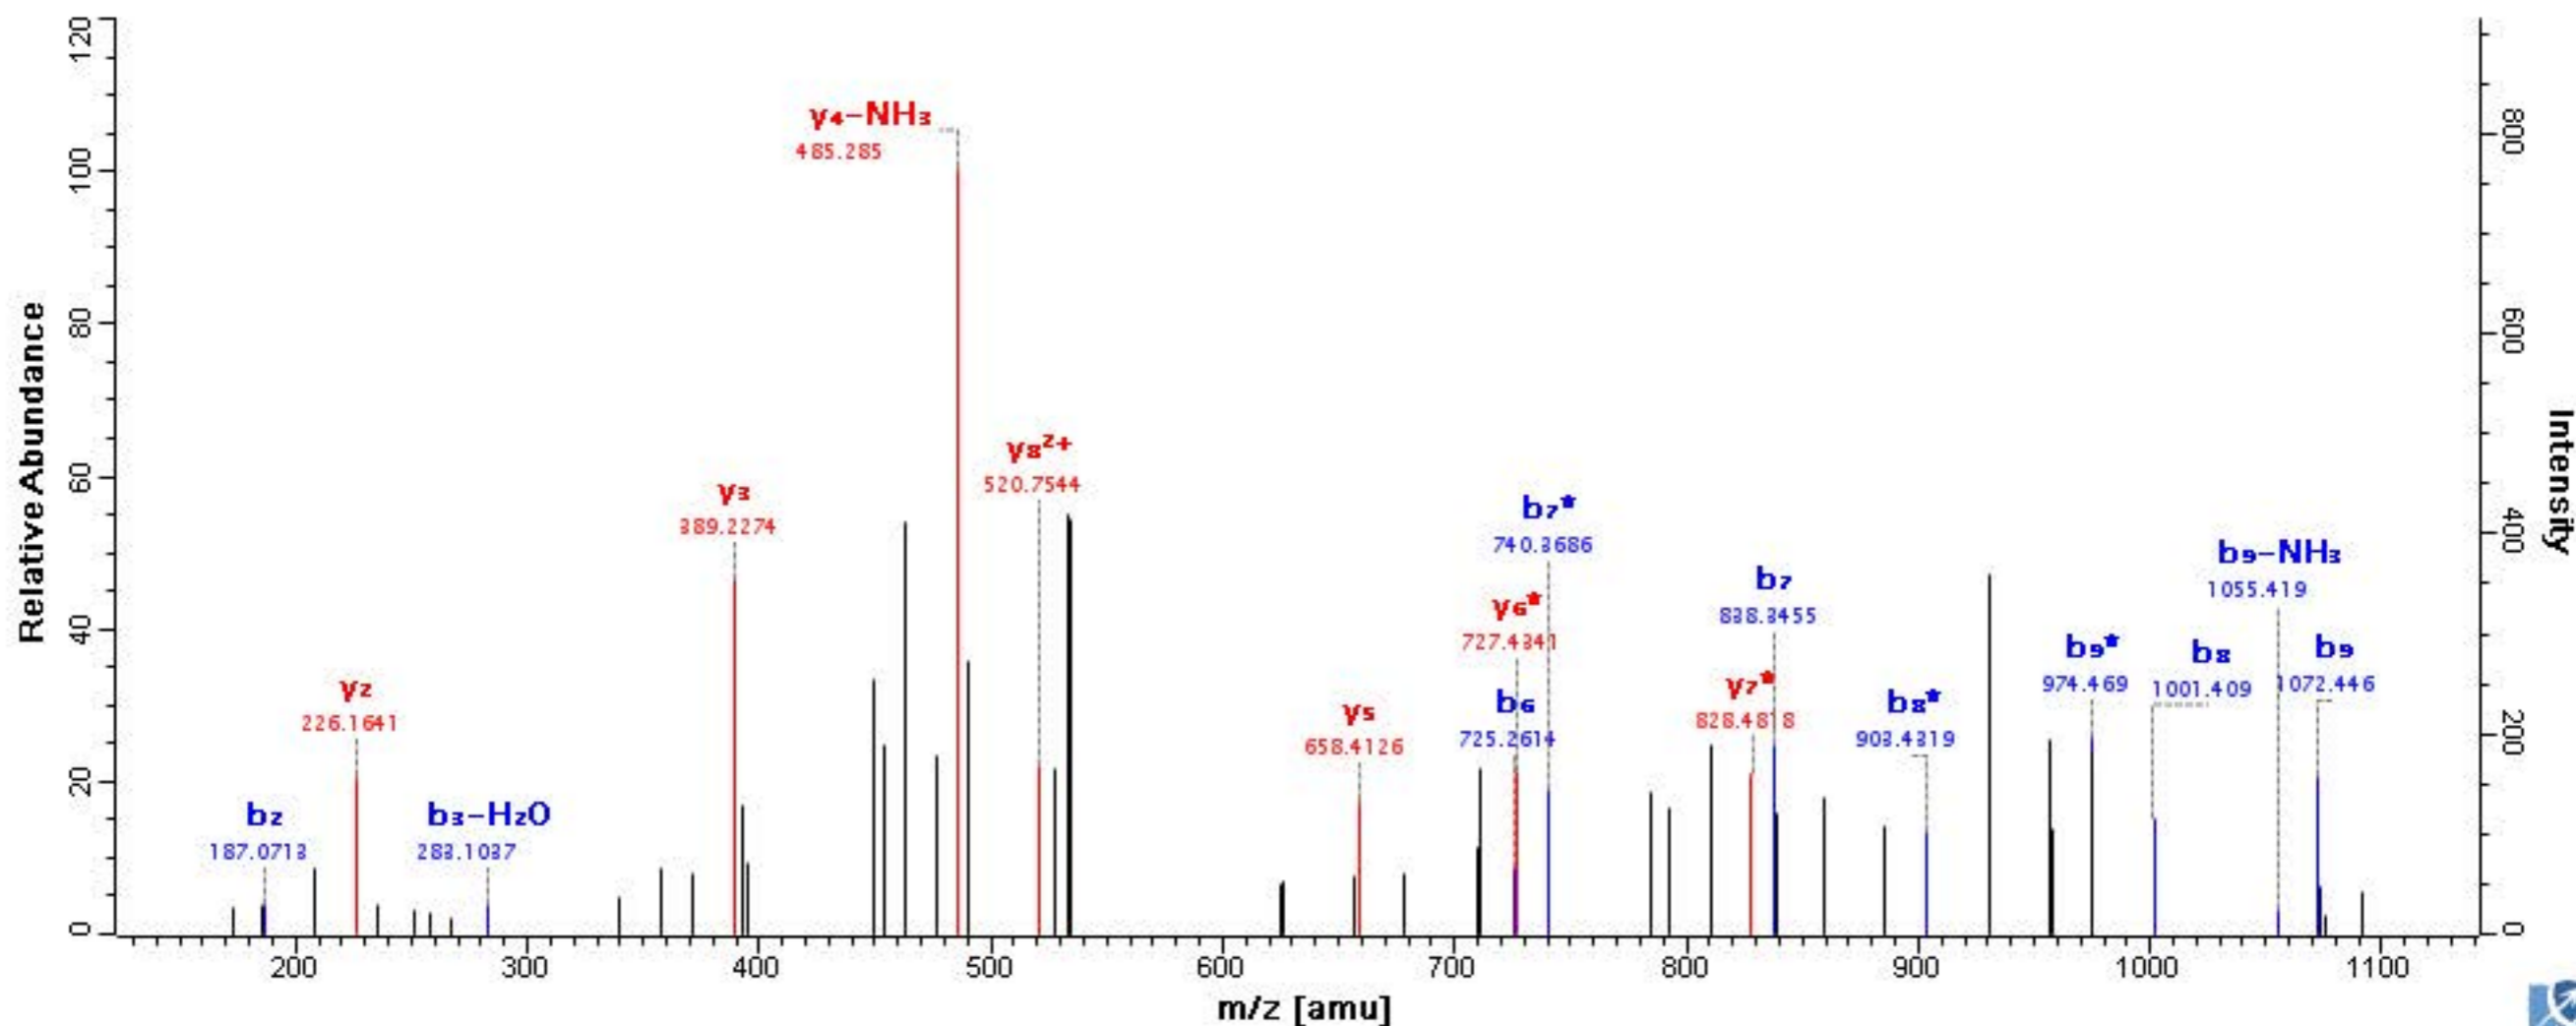

**precursor information**

|                   |                     |
|-------------------|---------------------|
| Mass:             | 1217.54453          |
| m/z:              | System.Collections. |
| Charge:           | System.Collections. |
| Retentiontime:    | System.Collections. |
| Score:            | 75.81944            |
| Mass Error [ppm]: | 0.29863             |
| PEP:              | 0.011679            |
| Precursor Type:   | MULTI               |

**general information**

|                       |           |
|-----------------------|-----------|
| Annotation:           | 8 of 10   |
| AminoAcids Coverage:  | 80 %      |
| Intensity Coverage:   | 37 %      |
| Protein Localisation: | 16 ... 25 |

| b ion      |              |    |     |   | gamma ion    |            | gamma <sup>2+</sup> ion |            |
|------------|--------------|----|-----|---|--------------|------------|-------------------------|------------|
| Δ dalton   | mass         |    | seq |   | Δ dalton     | mass       | Δ dalton                | mass       |
|            | 116.0342195  | 1  | D   | 9 |              |            |                         |            |
| +0.2194382 | 187.07133329 | 2  | A   | 8 | 1111.5386988 |            | 1111.5386988            |            |
|            | 301.11426073 | 3  | N   | 7 | 1040.5015851 |            | 520.75443076            | -0.0157223 |
|            | 402.16193921 | 4  | T   | 6 | 926.45865761 |            | 926.45865761            |            |
|            | 569.16029803 | 5  | S   | 5 | 825.41097914 |            | 825.41097914            |            |
| -0.009517  | 725.26140905 | 6  | R   | 4 | 658.41262032 | +0.14341   | 658.41262032            |            |
| +0.015672  | 838.34547303 | 7  | I   | 3 | 502.31150929 |            | 502.31150929            |            |
| +0.1707272 | 1001.4088016 | 8  | Y   | 2 | 389.22744531 | +0.0831626 | 389.22744531            |            |
| -0.0848314 | 1072.4459154 | 9  | A   | 1 | 226.16411677 | +0.0156623 | 226.16411677            |            |
|            |              | 10 | K   | 0 | 155.12700298 |            | 155.12700298            |            |

Source: 20120530\_VR\_Bsu\_TripleSILAC\_pWTPPrkCPrpC\_F05  
 Scannumber: 4276  
 Protein: asn5; BSU22360  
 Peptide Score: 93.06  
 Method: ITMS; CID; 3

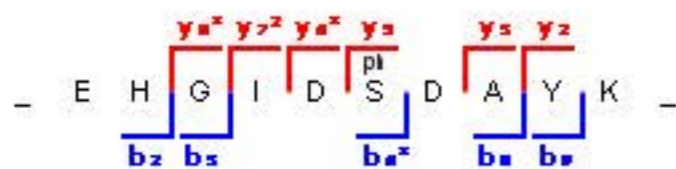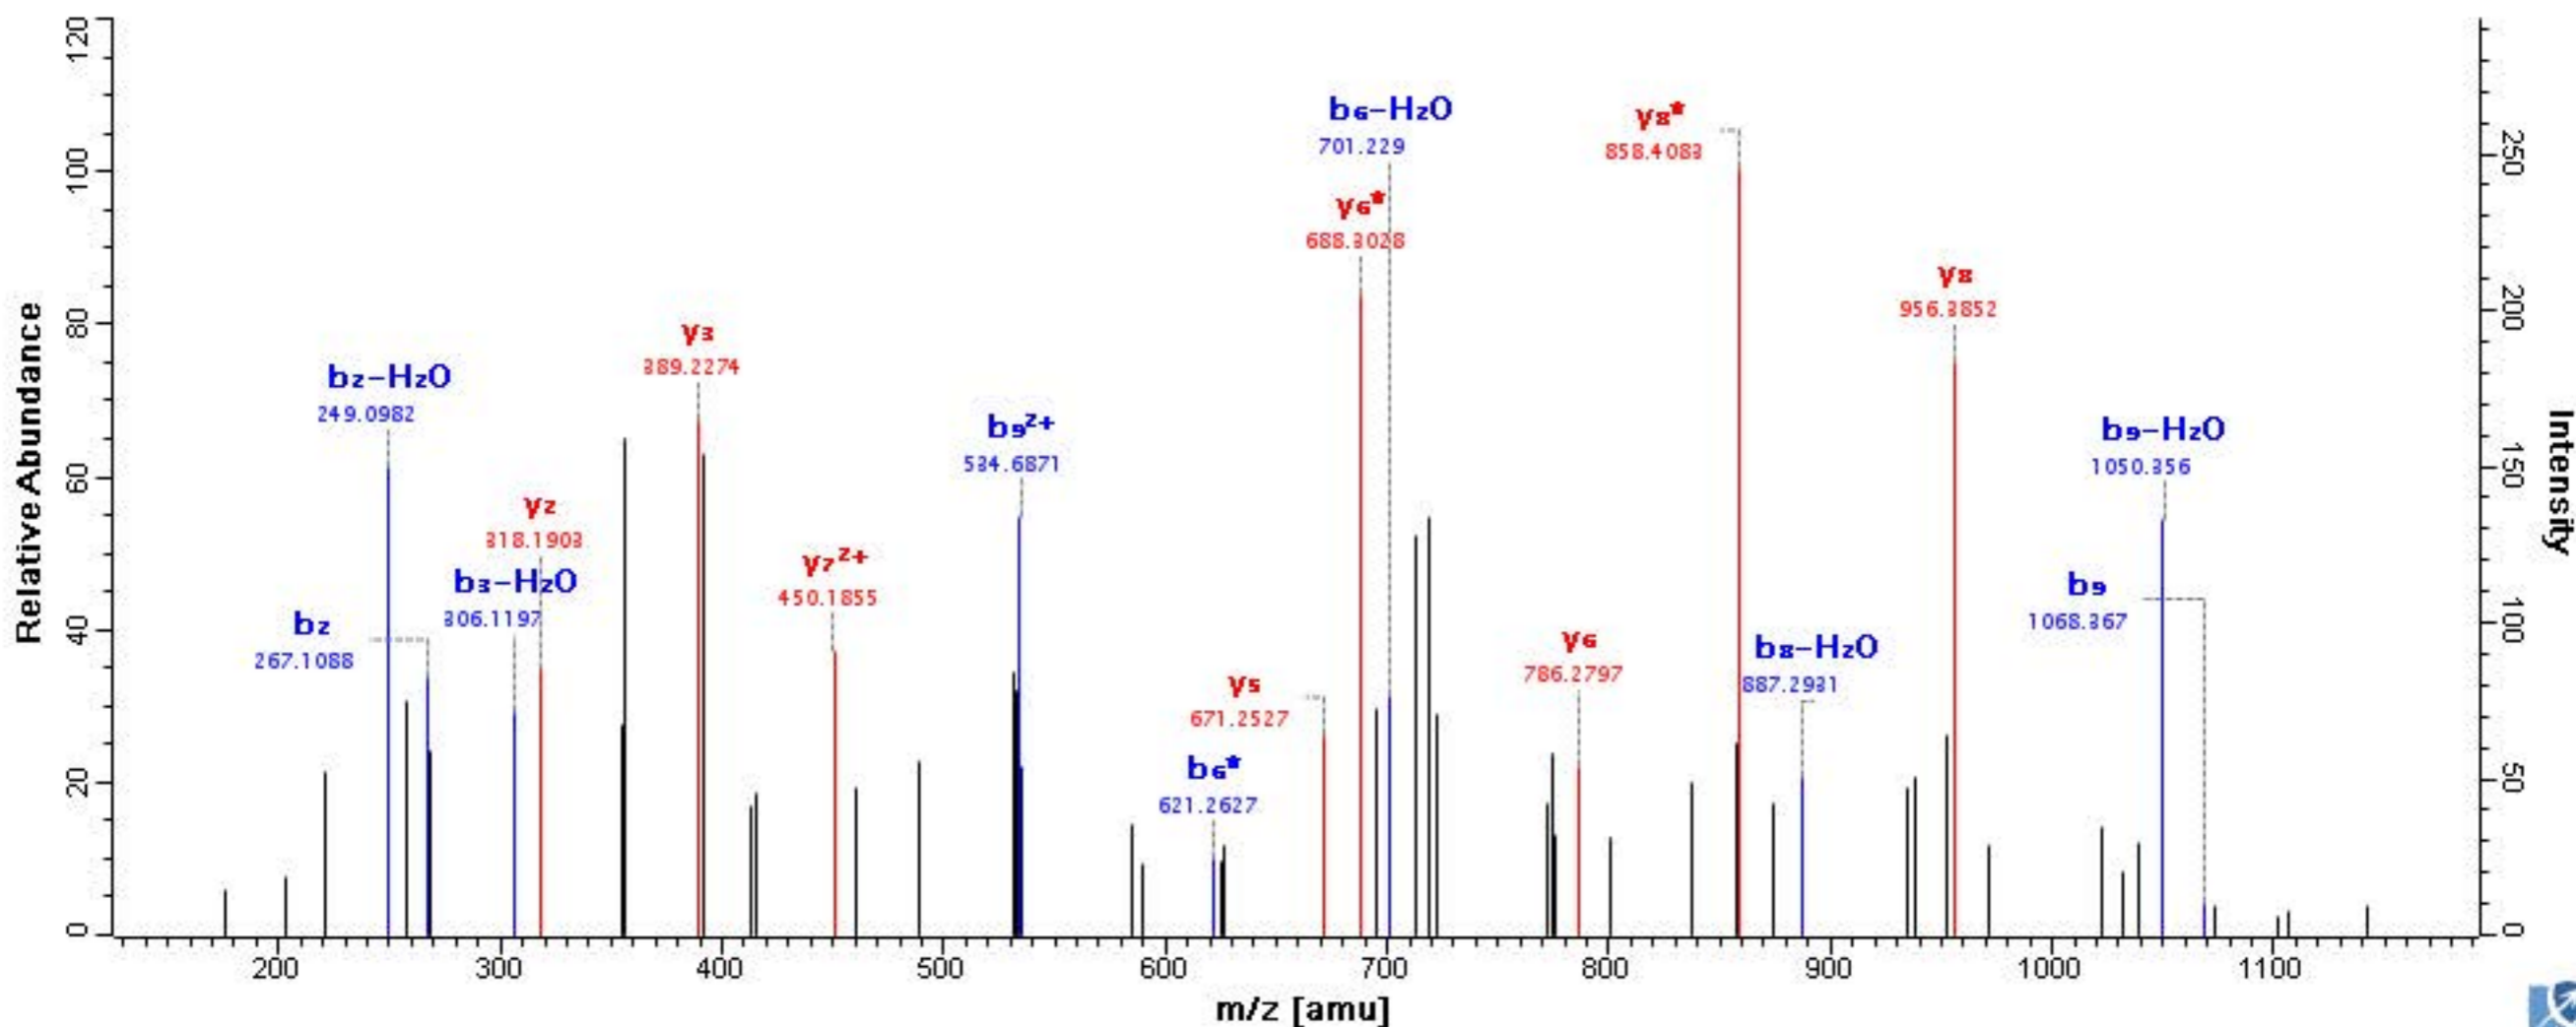

#### precursor information

|                   |                     |
|-------------------|---------------------|
| Mass:             | 1221.47922          |
| m/z:              | System.Collections. |
| Charge:           | System.Collections. |
| Retentiontime:    | System.Collections. |
| Score:            | 93.05779            |
| Mass Error [ppm]: | -0.18917            |
| PEP:              | 0.010369            |
| Precursor Type:   | ISO                 |

#### general information

|                       |             |
|-----------------------|-------------|
| Annotation:           | 7 of 10     |
| AminoAcids Coverage:  | 70 %        |
| Intensity Coverage:   | 46 %        |
| Protein Localisation: | 373 ... 382 |

| b <sup>2+</sup> ion |          | b ion     |          |     | y ion |          | y <sup>2+</sup> ion |           |          |           |
|---------------------|----------|-----------|----------|-----|-------|----------|---------------------|-----------|----------|-----------|
| Δ dalton            | mass     | Δ dalton  | mass     | seq |       | Δ dalton | mass                | Δ dalton  | mass     |           |
|                     | 130.0499 |           | 130.0499 | 1   | E     | 9        |                     |           |          |           |
|                     | 267.1088 | -0.359911 | 267.1088 | 2   | H     | 8        | 1093.444            |           | 1093.444 |           |
|                     | 324.1302 |           | 324.1302 | 3   | G     | 7        | 956.3852            | +0.065527 | 956.3852 |           |
|                     | 437.2143 |           | 437.2143 | 4   | I     | 6        | 899.3638            |           | 450.1855 | +0.405854 |
|                     | 552.2413 |           | 552.2413 | 5   | D     | 5        | 786.2797            | +0.074924 | 786.2797 |           |
|                     | 719.2396 |           | 719.2396 | 6   | S     | 4        | 671.2527            | -0.041688 | 671.2527 |           |
|                     | 834.2666 |           | 834.2666 | 7   | D     | 3        | 504.2544            |           | 504.2544 |           |
|                     | 905.3037 |           | 905.3037 | 8   | A     | 2        | 389.2274            | +0.136263 | 389.2274 |           |
| -0.309695           | 534.6871 | +0.055611 | 1068.367 | 9   | Y     | 1        | 318.1903            | +0.09928  | 318.1903 |           |
|                     |          |           |          | 10  | K     | 0        | 155.127             |           | 155.127  |           |

Source: 20120530\_VR\_Bsu\_TripleSILAC\_pWTPPrkCPrpC\_F05  
 Scannumber: 4629  
 Protein: BSU06440; purB; purE  
 Peptide Score: 83.87  
 Method: ITMS; CID; 3

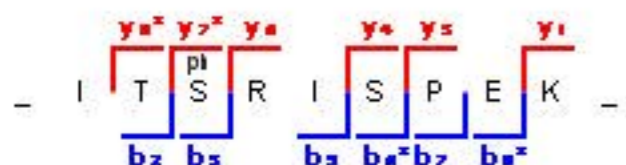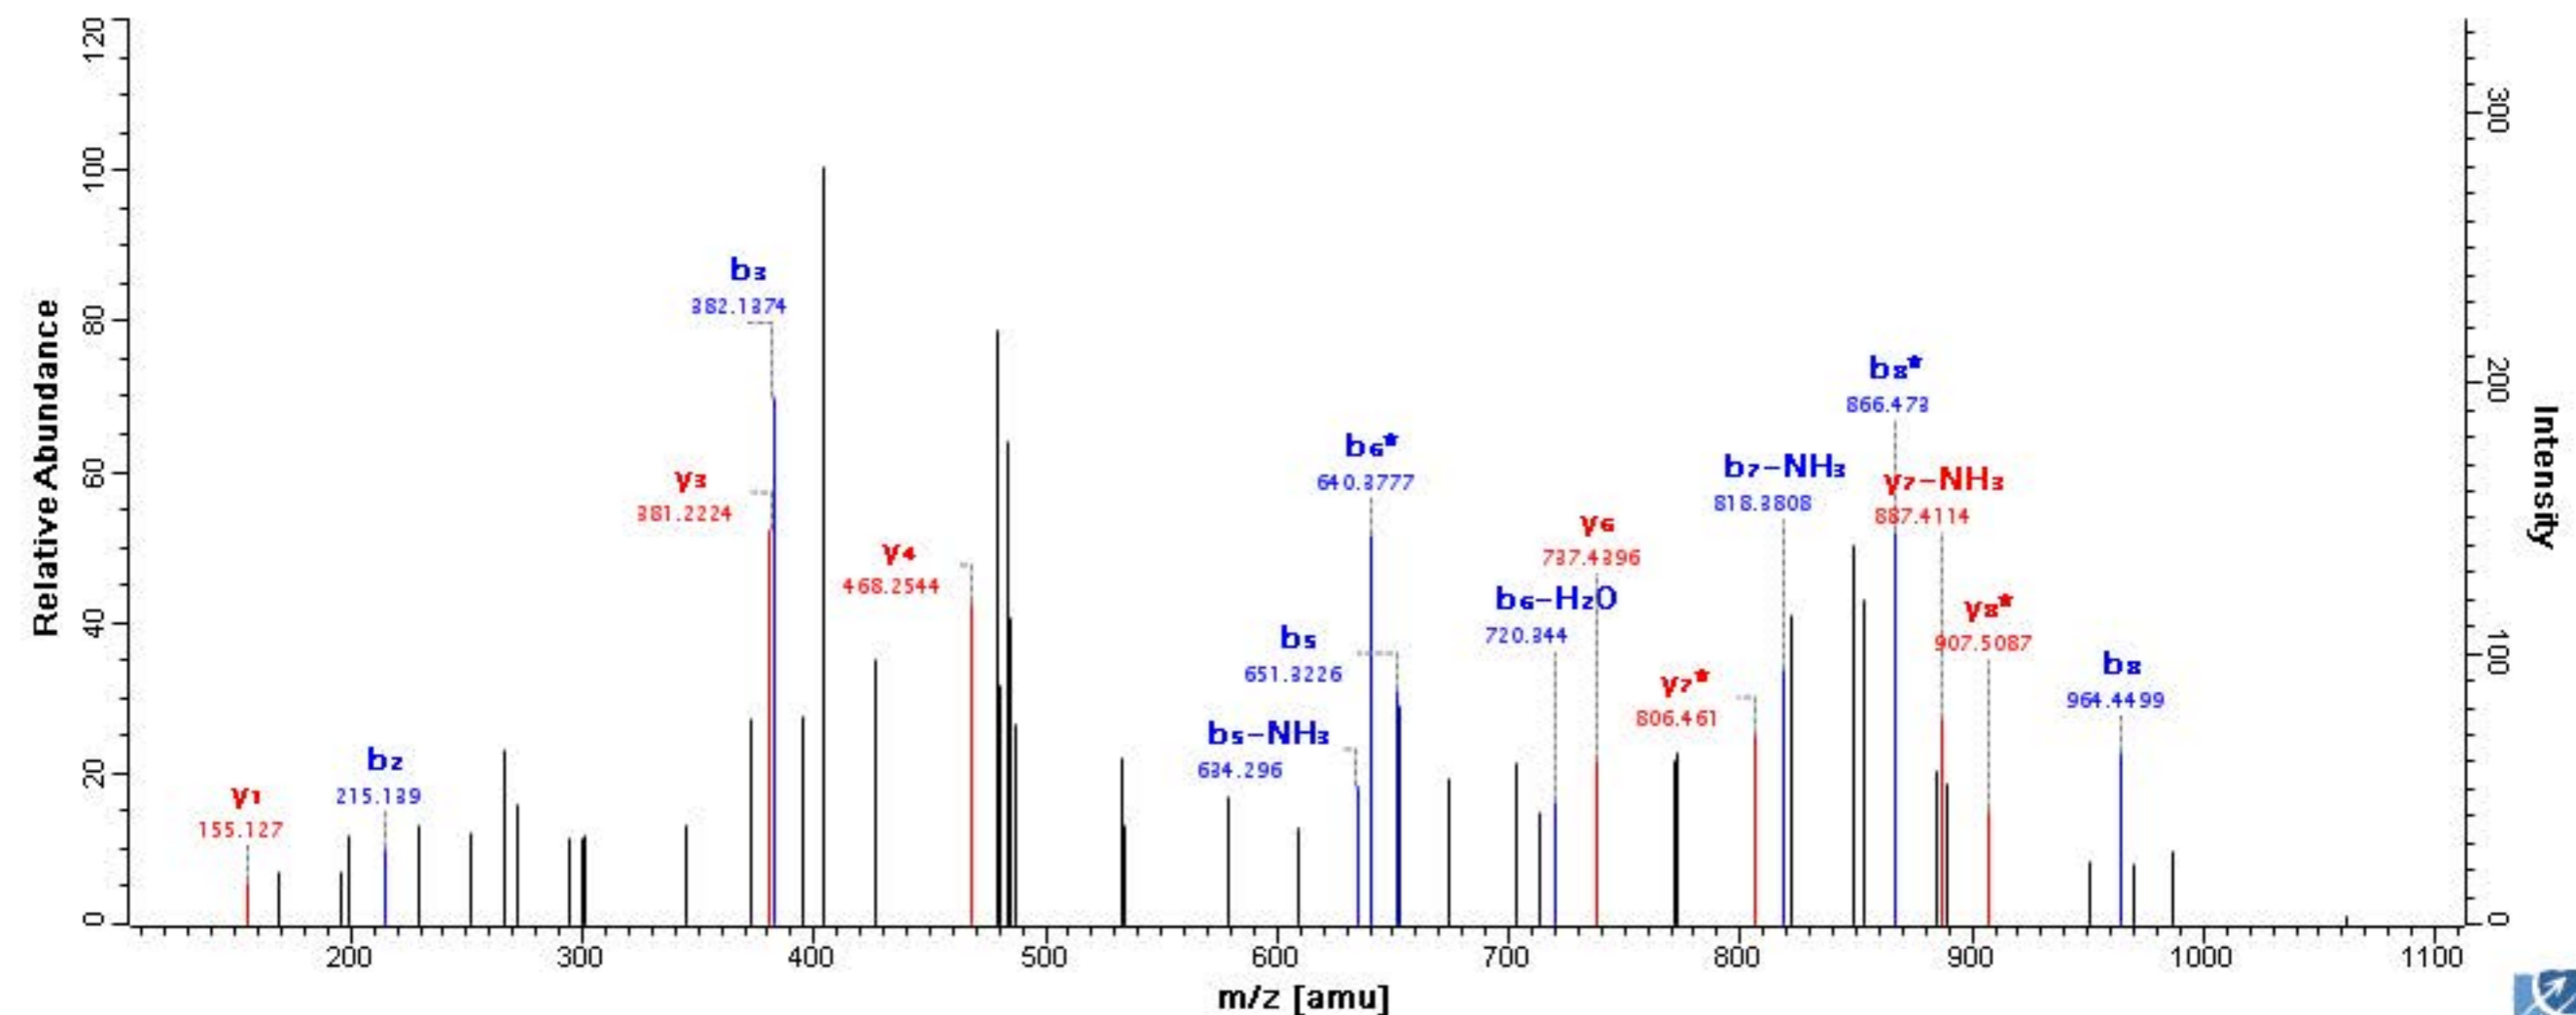

#### precursor information

|                       |                     |
|-----------------------|---------------------|
| Mass:                 | 1109.54821          |
| m/z:                  | System.Collections. |
| Charge:               | System.Collections. |
| Retentiontime:        | System.Collections. |
| Score:                | 83.86861            |
| Mass Error [ppm]:     | 0.0169              |
| PEP:                  | 0.031184            |
| g Precursor Type:     | MULTI               |
| Annotation:           | 8 of 9              |
| AminoAcids Coverag    | 89 %                |
| Intensity Coverage:   | 34 %                |
| Protein Localisation: | 399 ... 407         |

| b ion           |               |   |     |   |                 | y ion      |  |
|-----------------|---------------|---|-----|---|-----------------|------------|--|
| $\Delta$ dalton | mass          |   | seq |   | $\Delta$ dalton | mass       |  |
|                 | 114.091340447 | 1 | I   | 8 |                 |            |  |
| +0.0668221      | 215.139018921 | 2 | T   | 7 | 1005.485600643  |            |  |
| +0.1758547      | 382.137377739 | 3 | S   | 6 | 904.437922169   |            |  |
|                 | 538.238488768 | 4 | R   | 5 | 737.43956335    | +0.1003536 |  |
| -0.0462466      | 651.322552748 | 5 | I   | 4 | 581.338452322   |            |  |
|                 | 738.354581158 | 6 | S   | 3 | 468.254388342   | +0.1608338 |  |
|                 | 835.40734501  | 7 | P   | 2 | 381.222359932   | -0.1232999 |  |
| +0.0456063      | 964.449938106 | 8 | E   | 1 | 284.16959608    |            |  |
|                 |               | 9 | K   | 0 | 155.127002984   | -0.115742  |  |

Source: 20120530\_VR\_Bsu\_TripleSILAC\_pWTPPrkCPrpC\_F05  
 Scannumber: 5194  
 Protein: BSU06030; groEL; groL; mopA  
 Peptide Score: 76.33  
 Method: ITMS; CID; 3

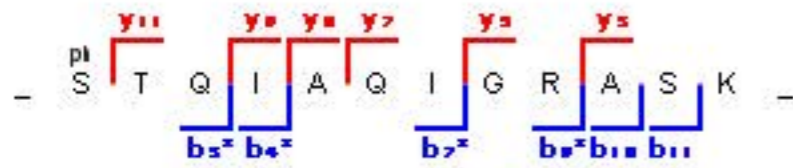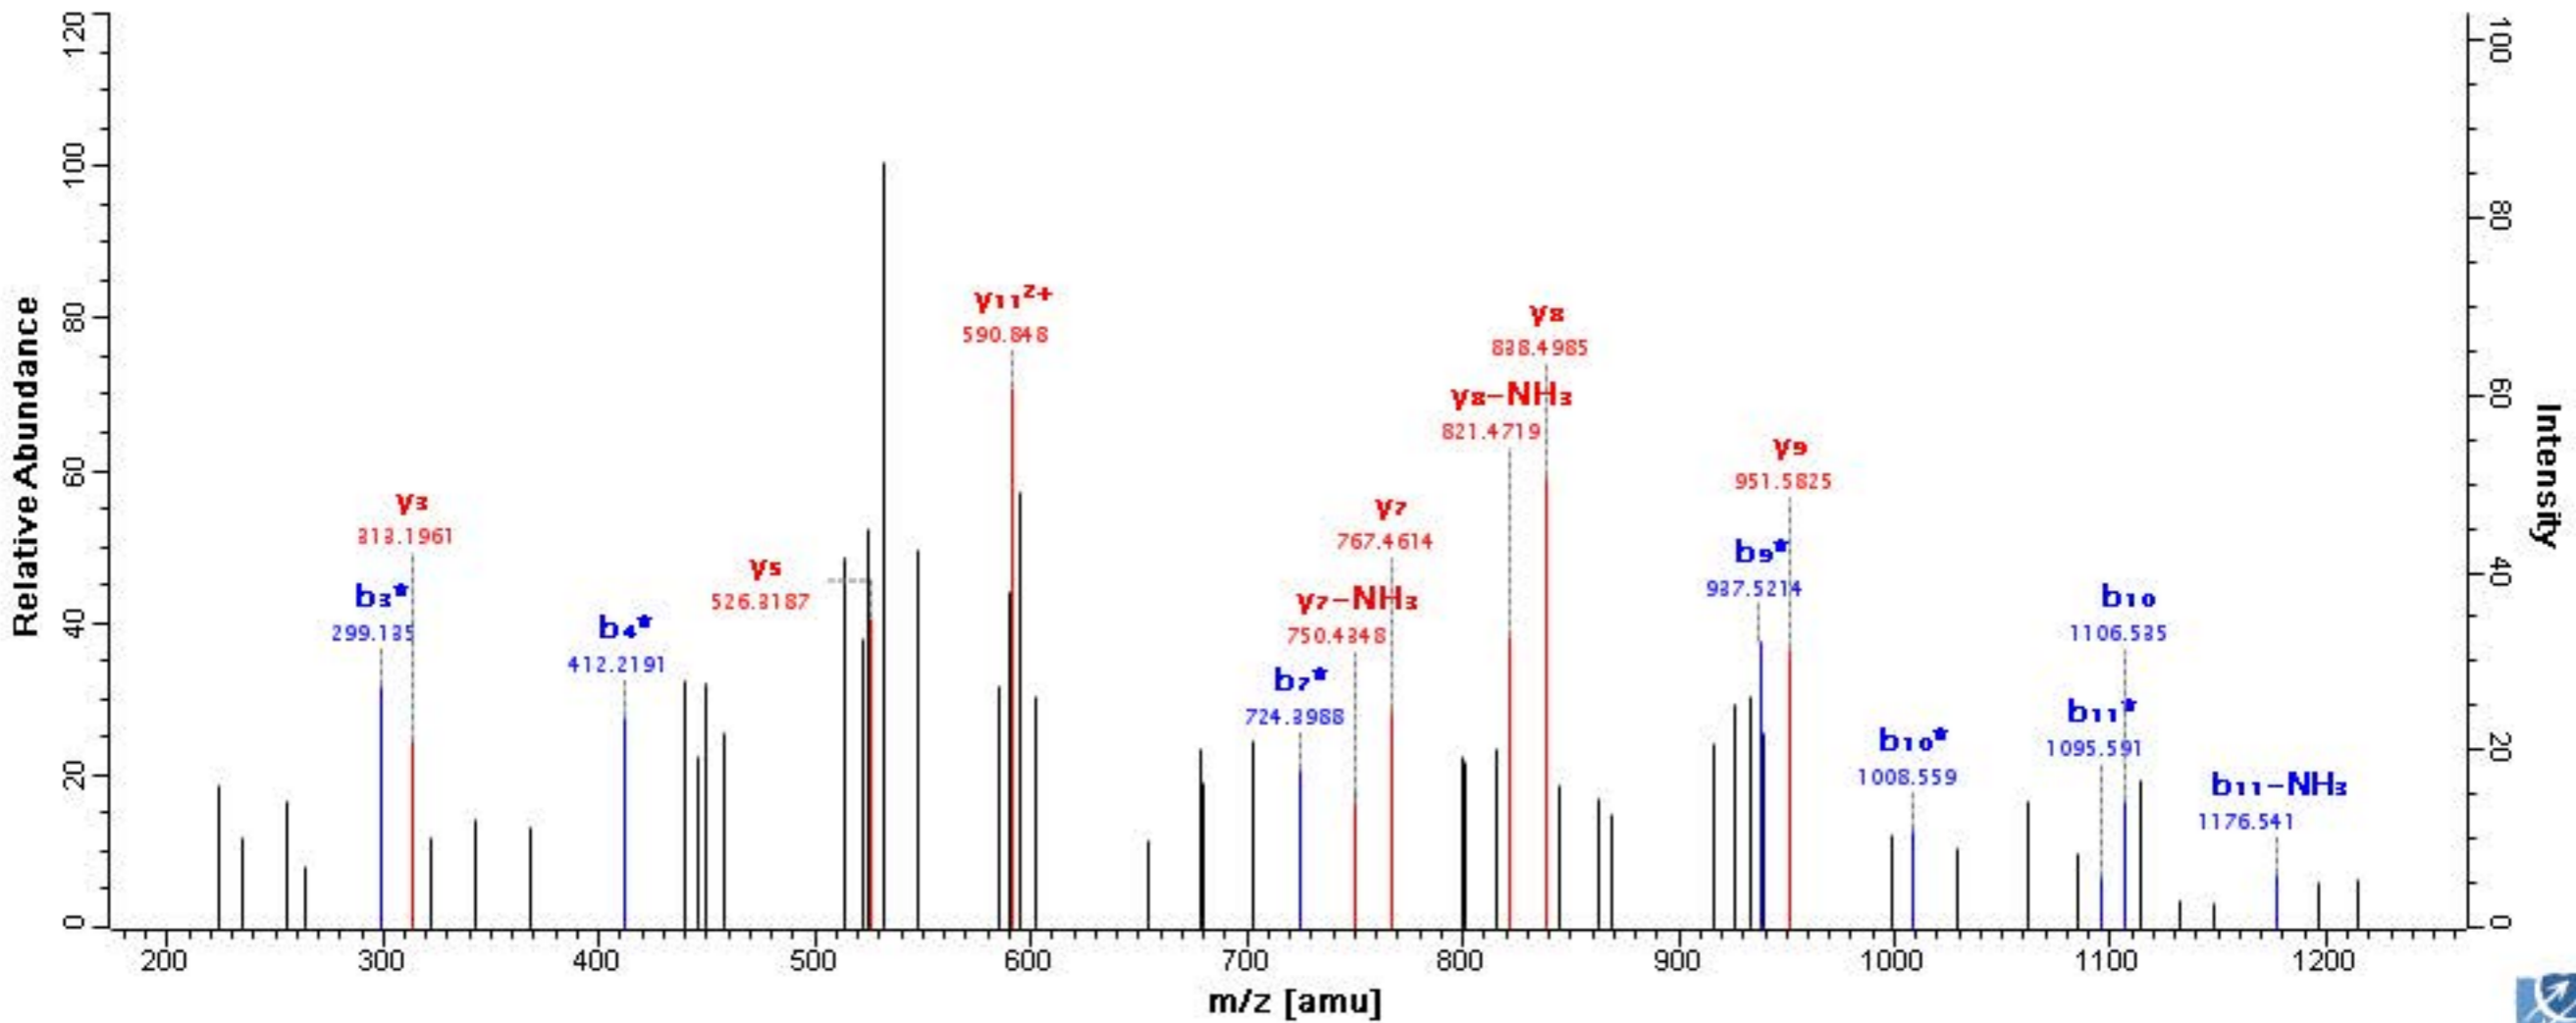

#### precursor information

|                   |                     |
|-------------------|---------------------|
| Mass:             | 1338.66519          |
| m/z:              | System.Collections. |
| Charge:           | System.Collections. |
| Retentiontime:    | System.Collections. |
| Score:            | 76.32578            |
| Mass Error [ppm]: | -0.35984            |
| PEP:              | 0.0094223           |
| Precursor Type:   | MULTI               |

#### general information

|                       |             |
|-----------------------|-------------|
| Annotation:           | 10 of 12    |
| AminoAcids Coverag    | 83 %        |
| Intensity Coverage:   | 31 %        |
| Protein Localisation: | 309 ... 320 |

| b ion     |              |    |     |    | y ion        |            | y <sup>2+</sup> ion |         |
|-----------|--------------|----|-----|----|--------------|------------|---------------------|---------|
| Δ dalton  | mass         |    | seq |    | Δ dalton     | mass       | Δ dalton            | mass    |
|           | 168.00563528 | 1  | S   | 11 |              |            |                     |         |
|           | 269.05331376 | 2  | T   | 10 | 1180.6887952 |            | 590.84803582        | +0.2437 |
|           | 397.11189127 | 3  | Q   | 9  | 1079.6411167 |            | 1079.6411167        |         |
|           | 510.19595525 | 4  | I   | 8  | 951.58253919 | +0.1433519 | 951.58253919        |         |
|           | 581.23306904 | 5  | A   | 7  | 838.49847521 | -0.2316905 | 838.49847521        |         |
|           | 709.29164655 | 6  | Q   | 6  | 767.46136142 | +0.0644564 | 767.46136142        |         |
|           | 822.37571053 | 7  | I   | 5  | 639.40278391 |            | 639.40278391        |         |
|           | 879.39717425 | 8  | G   | 4  | 526.31871993 | +0.0219783 | 526.31871993        |         |
|           | 1035.4982853 | 9  | R   | 3  | 469.29725621 |            | 469.29725621        |         |
| +0.417848 | 1106.5353991 | 10 | A   | 2  | 313.19614518 | +0.0884618 | 313.19614518        |         |
|           | 1193.5674275 | 11 | S   | 1  | 242.15903139 |            | 242.15903139        |         |
|           |              | 12 | K   | 0  | 155.12700298 |            | 155.12700298        |         |

Source: 201 20530\_VR\_Bsu\_TripleSILAC\_pWTPPrkCPrpC\_F05  
 Scannumber: 5282  
 Protein: BSU32260; hom; tdm  
 Peptide Score: 115.29  
 Method: ITMS; CID; 3

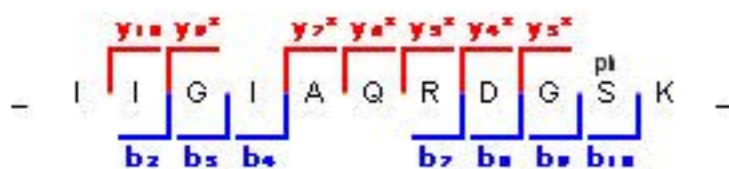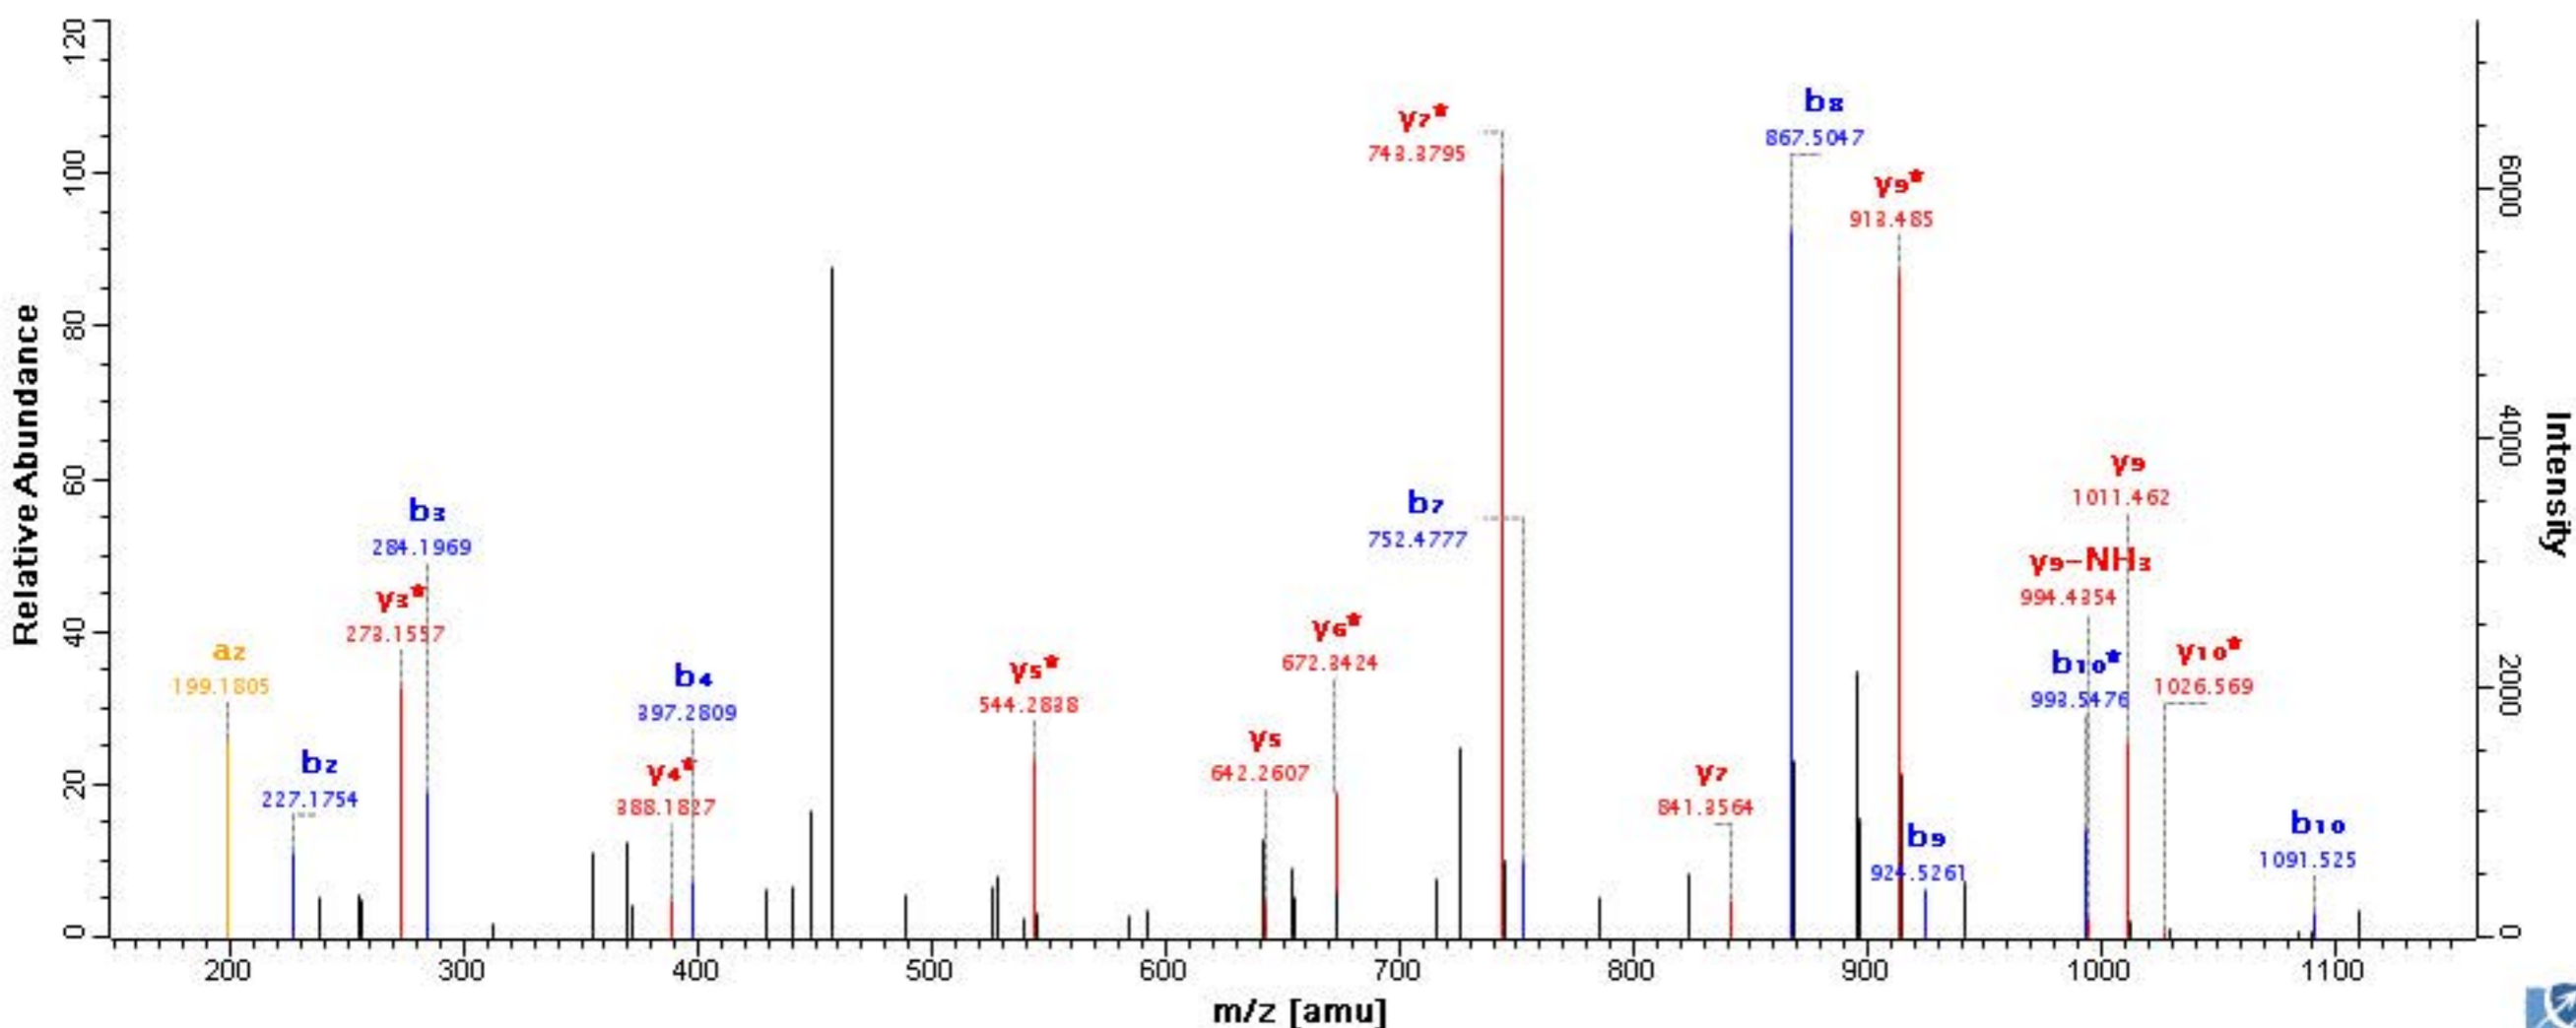

**precursor information**

|                   |                     |
|-------------------|---------------------|
| Mass:             | 1236.62257          |
| m/z:              | System.Collections. |
| Charge:           | System.Collections. |
| Retentiontime:    | System.Collections. |
| Score:            | 115.2865            |
| Mass Error [ppm]: | -0.14475            |
| PEP:              | 1.5799E-06          |
| Precursor Type:   | MULTI               |

**general information**

|                       |             |
|-----------------------|-------------|
| Annotation:           | 9 of 11     |
| AminoAcids Coverag    | 82 %        |
| Intensity Coverage:   | 55 %        |
| Protein Localisation: | 248 ... 258 |

| a ion      |              | b ion      |              |     | y ion    |      |  |
|------------|--------------|------------|--------------|-----|----------|------|--|
| Δ dalton   | mass         | Δ dalton   | mass         | seq | Δ dalton | mass |  |
|            | 86.096425825 |            | 114.09134045 | 1   | I        | 10   |  |
| +0.1528384 | 199.18048981 | +0.0445052 | 227.17540443 | 2   | I        | 9    |  |
|            | 256.20195353 | +0.0754402 | 284.19686815 | 3   | G        | 8    |  |
|            | 369.28601751 | -0.0661494 | 397.28093213 | 4   | I        | 7    |  |
|            | 440.3231313  |            | 468.31804592 | 5   | A        | 6    |  |
|            | 568.38170881 |            | 596.37662343 | 6   | Q        | 5    |  |
|            | 724.48281984 | +0.1458617 | 752.47773446 | 7   | R        | 4    |  |
|            | 839.50976287 | +0.0006936 | 867.50467749 | 8   | D        | 3    |  |
|            | 896.53122659 | -0.1024962 | 924.52614121 | 9   | G        | 2    |  |
|            | 1063.5295854 | +0.0216425 | 1091.5245    | 10  | S        | 1    |  |
|            |              |            |              | 11  | K        | 0    |  |



Source: 201 20530\_VR\_Bsu\_TripleSILAC\_pWTPPrkCPrpC\_F05  
 Scannumber: 5774  
 Protein: BSU08790; thiA; thiC  
 Peptide Score: 242.48  
 Method: ITMS; CID; 3

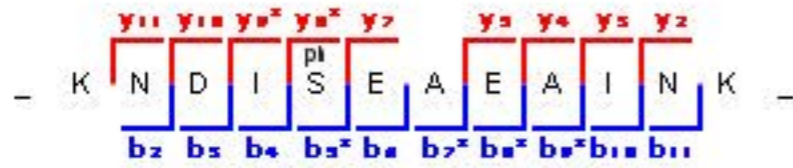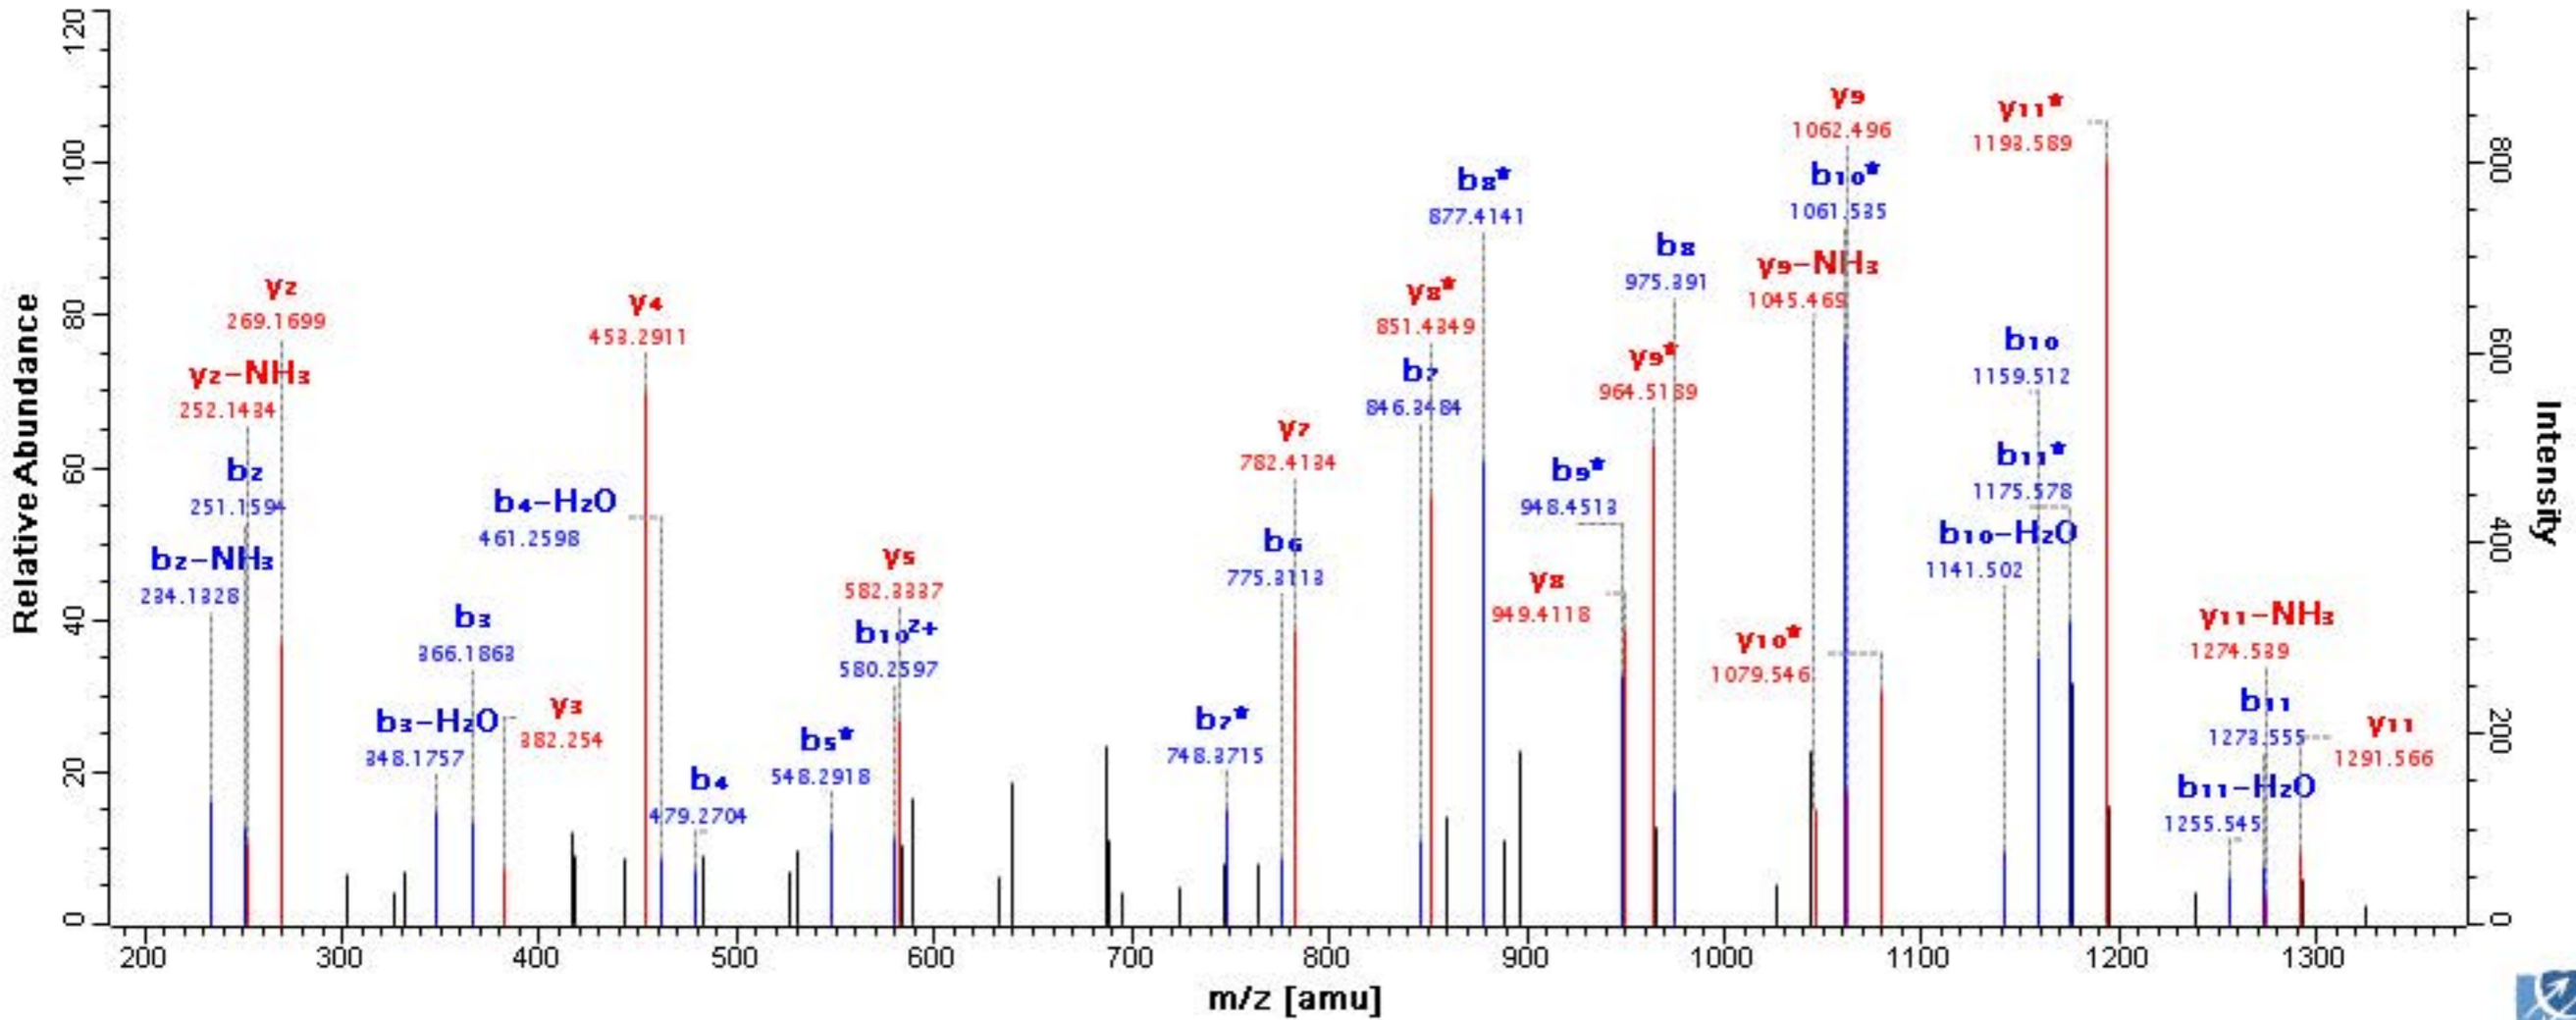

**precursor information**

|                   |                     |
|-------------------|---------------------|
| Mass:             | 1410.63878          |
| m/z:              | System.Collections. |
| Charge:           | System.Collections. |
| Retentiontime:    | System.Collections. |
| Score:            | 242.4801            |
| Mass Error [ppm]: | -0.2873             |
| PEP:              | 5.77E-81            |
| Precursor Type:   | MULTI               |

**general information**

|                       |             |
|-----------------------|-------------|
| Annotation:           | 10 of 12    |
| AminoAcids Coverag    | 83 %        |
| Intensity Coverage:   | 72 %        |
| Protein Localisation: | 561 ... 572 |

| b <sup>2+</sup> ion |              | b ion      |              |     | y ion |          |                         |
|---------------------|--------------|------------|--------------|-----|-------|----------|-------------------------|
| Δ dalton            | mass         | Δ dalton   | mass         | seq |       | Δ dalton | mass                    |
|                     | 137.1164383  |            | 137.1164383  | 1   | K     | 11       |                         |
|                     | 251.15936574 | +0.2621736 | 251.15936574 | 2   | N     | 10       | 1291.5657015 +0.0647917 |
|                     | 366.18630878 | +0.0429393 | 366.18630878 | 3   | D     | 9        | 1177.522774             |
|                     | 479.27037276 | +0.1471077 | 479.27037276 | 4   | I     | 8        | 1062.495831 +0.0155216  |
|                     | 646.26873158 |            | 646.26873158 | 5   | S     | 7        | 949.411767 +0.0729132   |
|                     | 775.31132467 | +0.0291905 | 775.31132467 | 6   | E     | 6        | 782.41340818 +0.0743238 |
|                     | 846.34843846 | -0.1417734 | 846.34843846 | 7   | A     | 5        | 653.37081508            |
|                     | 975.39103156 | -0.0116981 | 975.39103156 | 8   | E     | 4        | 582.3337013 +0.0911034  |
|                     | 1046.4281453 |            | 1046.4281453 | 9   | A     | 3        | 453.2911082 -0.0041209  |
| -0.2710344          | 580.2597429  | +0.0125709 | 1159.5122093 | 10  | I     | 2        | 382.25399441 +0.1347385 |
|                     | 1273.5551368 | -0.1685401 | 1273.5551368 | 11  | N     | 1        | 269.16993043 +0.0344763 |
|                     |              |            |              | 12  | K     | 0        | 155.12700298            |

Source: 20120530\_VR\_Bsu\_TripleSILAC\_pWTPPrkCPrpC\_F05  
 Scannumber: 6191  
 Protein: BSU15420; divIVA; ylmj  
 Peptide Score: 71.88  
 Method: ITMS; CID; 3

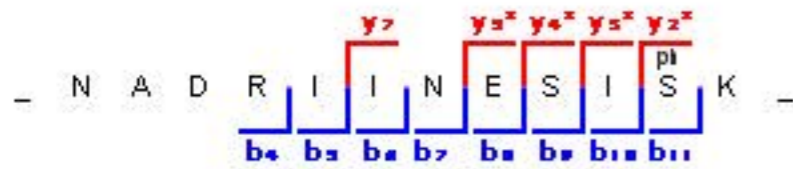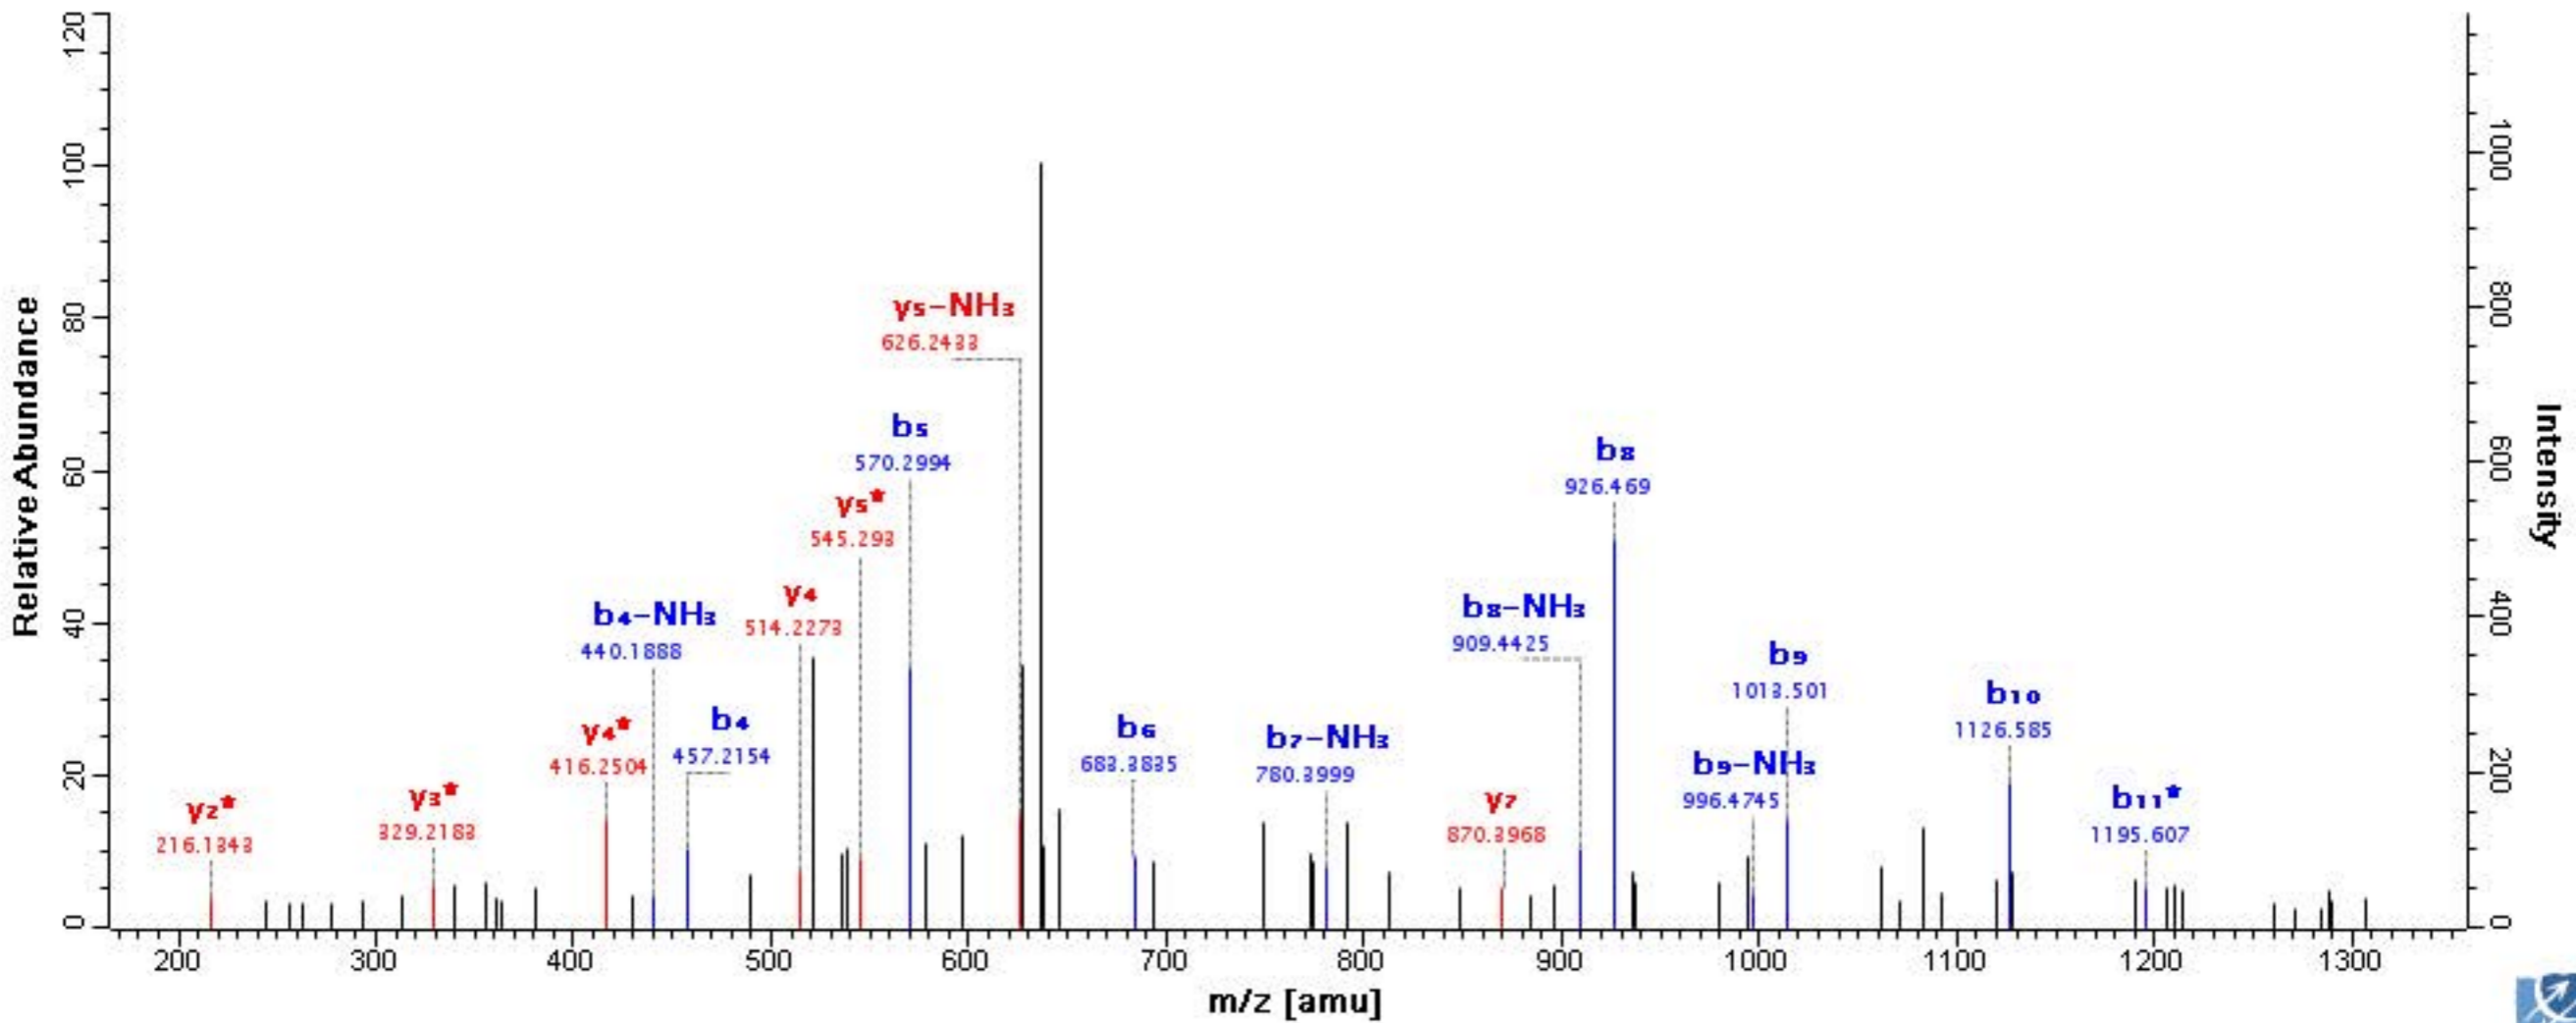

**precursor information**

|                   |                     |
|-------------------|---------------------|
| Mass:             | 1438.68231          |
| m/z:              | System.Collections. |
| Charge:           | System.Collections. |
| Retentiontime:    | System.Collections. |
| Score:            | 71.87868            |
| Mass Error [ppm]: | 0.41004             |
| PEP:              | 0.014523            |
| Precursor Type:   | MULTI               |

**general information**

|                       |            |
|-----------------------|------------|
| Annotation:           | 8 of 12    |
| AminoAcids Coverag    | 67 %       |
| Intensity Coverage:   | 32 %       |
| Protein Localisation: | 99 ... 110 |

| b ion      |                |    |     |    | y ion          |            |  |
|------------|----------------|----|-----|----|----------------|------------|--|
| Δ dalton   | mass           |    | seq |    | Δ dalton       | mass       |  |
|            | 115.050203914  | 1  | N   | 11 |                |            |  |
|            | 186.087317702  | 2  | A   | 10 | 1325.646071731 |            |  |
|            | 301.114260734  | 3  | D   | 9  | 1254.608957944 |            |  |
| +0.1255096 | 457.215371762  | 4  | R   | 8  | 1139.582014912 |            |  |
| +0.1419095 | 570.299435742  | 5  | I   | 7  | 983.480903883  |            |  |
| +0.2281336 | 683.383499723  | 6  | I   | 6  | 870.396839903  | -0.0985001 |  |
|            | 797.42642717   | 7  | N   | 5  | 757.312775923  |            |  |
| -0.0357317 | 926.469020266  | 8  | E   | 4  | 643.269848475  |            |  |
| +0.1525768 | 1013.501048676 | 9  | S   | 3  | 514.227255379  | +0.2529692 |  |
| +0.0406198 | 1126.585112656 | 10 | I   | 2  | 427.195226969  |            |  |
|            | 1293.583471475 | 11 | S   | 1  | 314.111162989  |            |  |
|            |                | 12 | K   | 0  | 147.112804171  |            |  |

Source: 20120530\_VR\_Bsu\_TripleSILAC\_pWTPPrkCPrpC\_F05  
 Scannumber: 6378  
 Protein: BSU01050; rplL  
 Peptide Score: 151.54  
 Method: ITMS; CID; 3

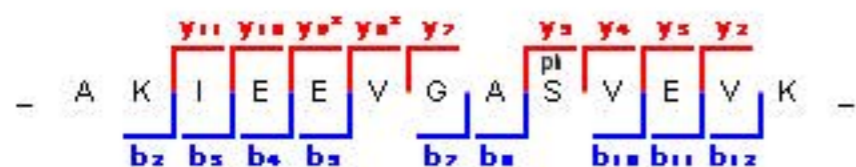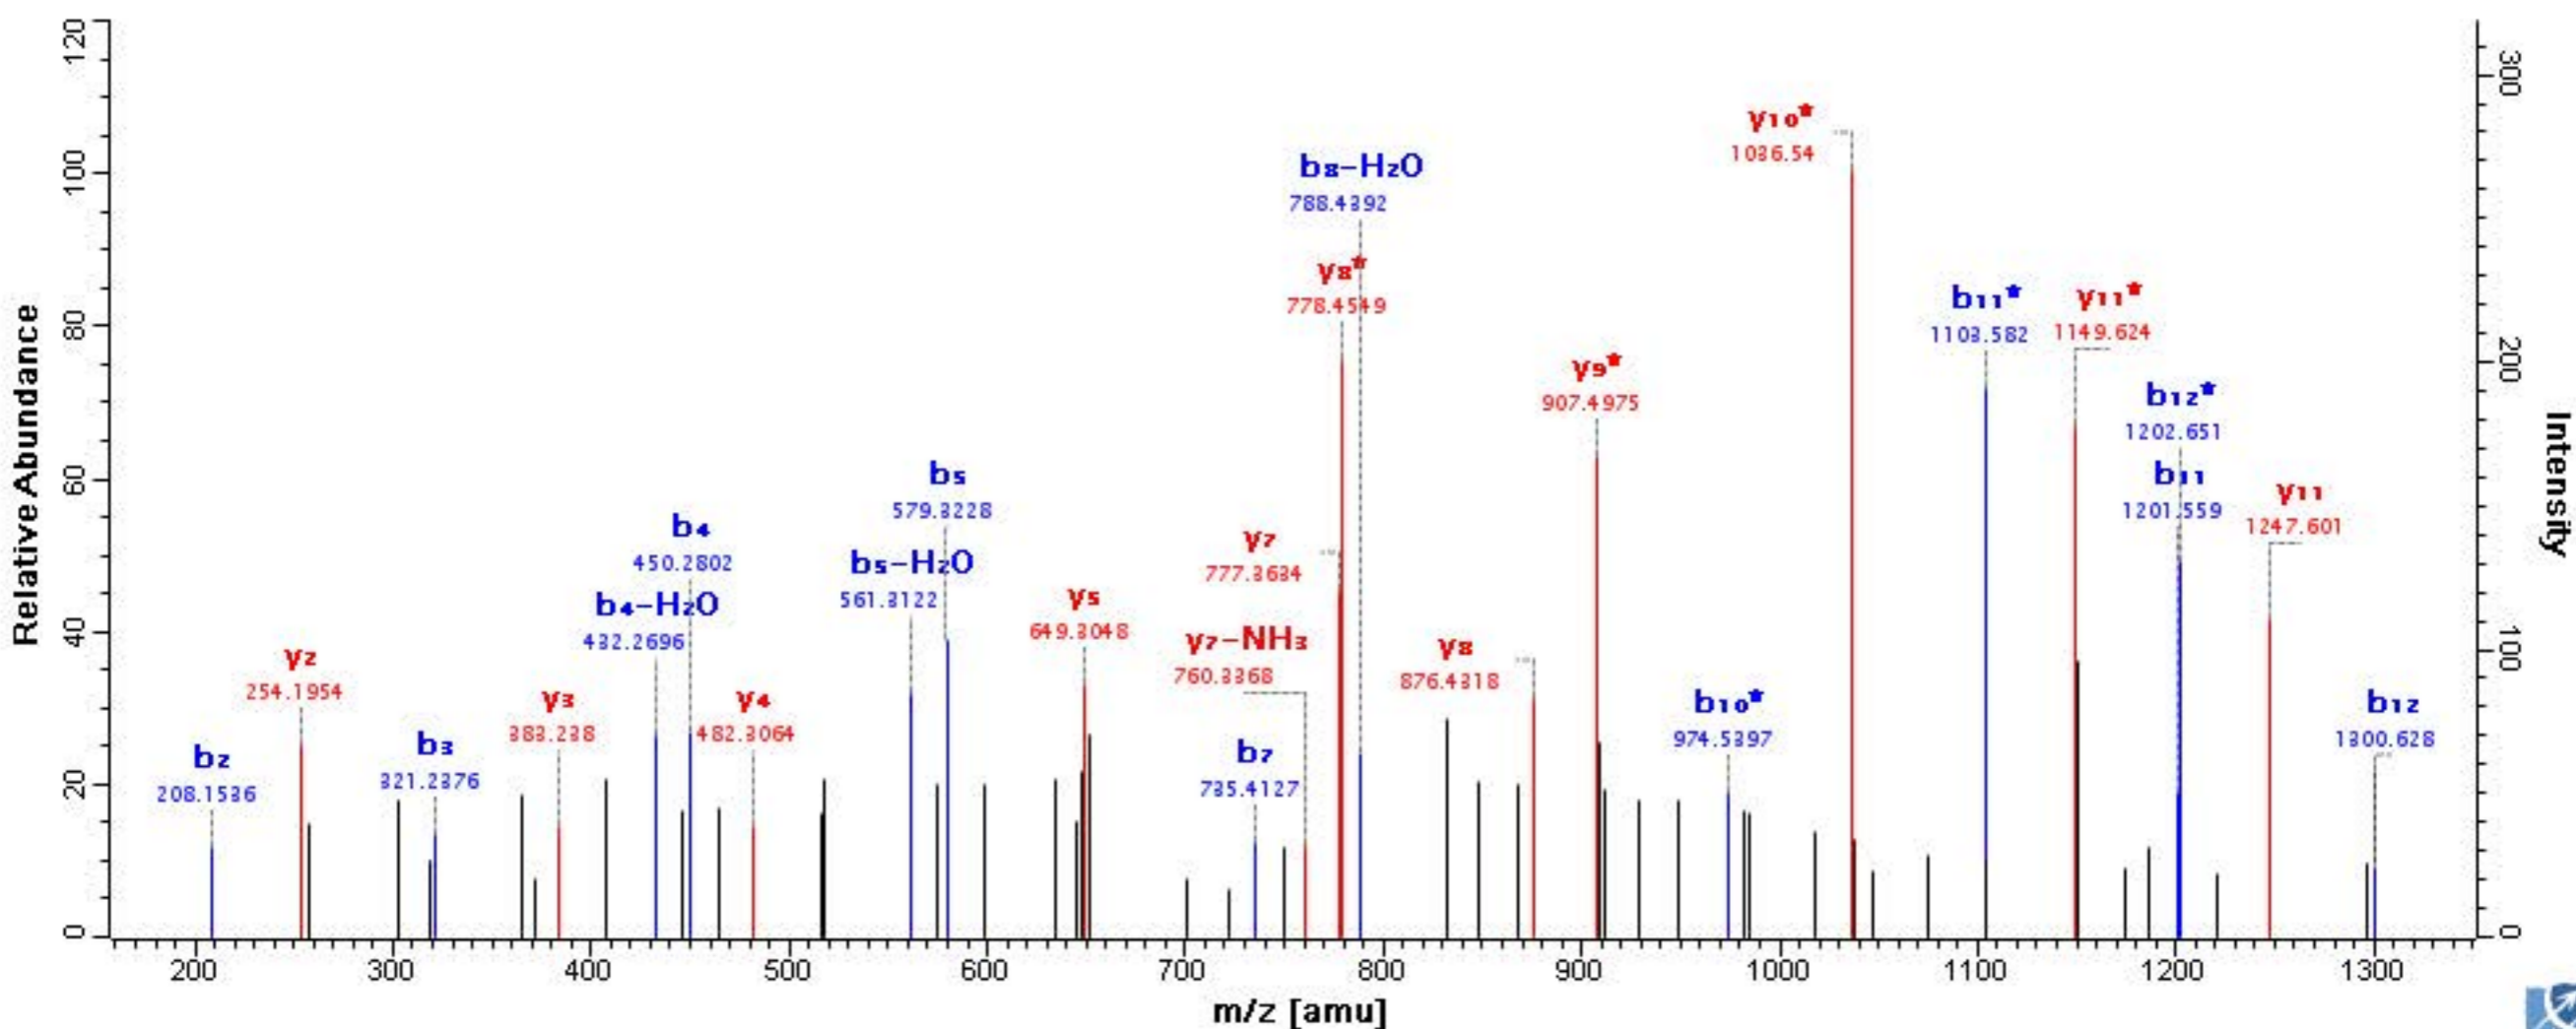

#### precursor information

|                   |                     |
|-------------------|---------------------|
| Mass:             | 1437.71187          |
| m/z:              | System.Collections. |
| Charge:           | System.Collections. |
| Retentiontime:    | System.Collections. |
| Score:            | 151.5416            |
| Mass Error [ppm]: | 0.16542             |
| PEP:              | 2.7115E-19          |
| Precursor Type:   | MULTI               |

#### general information

|                       |             |
|-----------------------|-------------|
| Annotation:           | 11 of 13    |
| AminoAcids Coverage:  | 85 %        |
| Intensity Coverage:   | 57 %        |
| Protein Localisation: | 111 ... 123 |

| b ion           |                | y ion |     |    |                 |            |
|-----------------|----------------|-------|-----|----|-----------------|------------|
| $\Delta$ dalton | mass           |       | seq |    | $\Delta$ dalton | mass       |
|                 | 72.044390254   | 1     | A   | 12 |                 |            |
| -0.0487547      | 208.153552085  | 2     | K   | 11 | 1383.710186162  |            |
| +0.0763793      | 321.237616066  | 3     | I   | 10 | 1247.601024331  | +0.0651134 |
| +0.0139803      | 450.280209162  | 4     | E   | 9  | 1134.516960351  |            |
| +0.1704228      | 579.322802258  | 5     | E   | 8  | 1005.474367255  |            |
|                 | 678.391216174  | 6     | V   | 7  | 876.431774158   | -0.4422112 |
| -0.1189787      | 735.412679898  | 7     | G   | 6  | 777.363360242   | +0.0611393 |
|                 | 806.449793686  | 8     | A   | 5  | 720.341896518   |            |
|                 | 973.448152504  | 9     | S   | 4  | 649.304782731   | -0.2951392 |
|                 | 1072.51656642  | 10    | V   | 3  | 482.306423912   | +0.0618622 |
| +0.0978229      | 1201.559159516 | 11    | E   | 2  | 383.238009996   | +0.1451077 |
| +0.3000389      | 1300.627573433 | 12    | V   | 1  | 254.1954169     | +0.0934472 |
|                 |                | 13    | K   | 0  | 155.127002984   |            |

Source: 201 20530\_VR\_Bsu\_TripleSILAC\_pWTPrkCPrpC\_F05  
 Scannumber: 6420  
 Protein: BSU28270; leuB; leuC  
 Peptide Score: 109.15  
 Method: ITMS; CID; 3

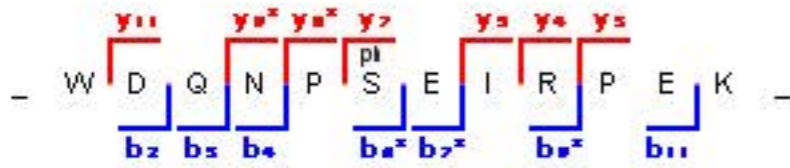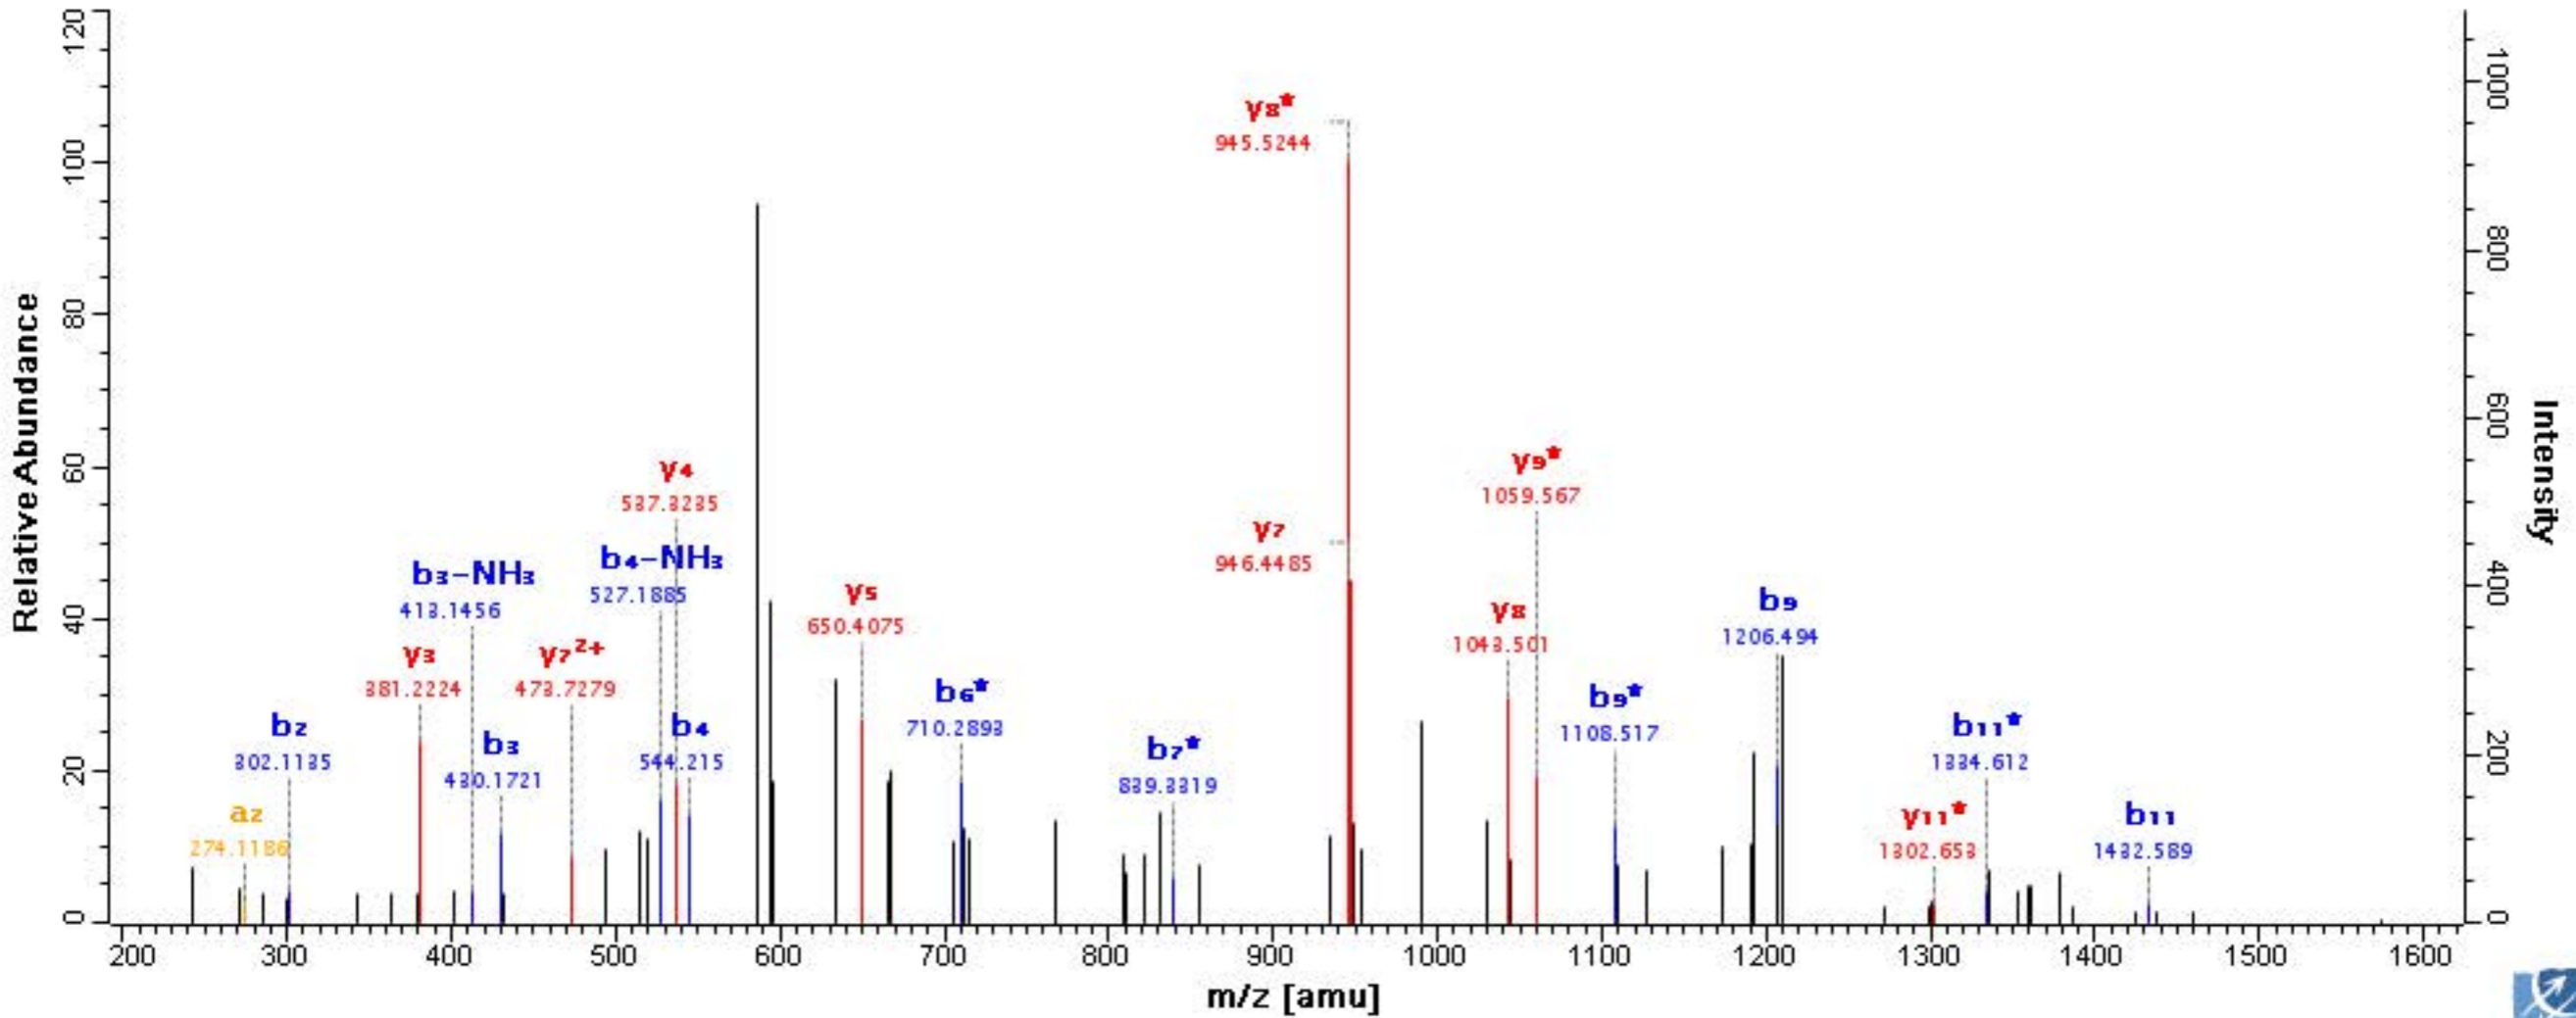

#### precursor information

|                   |                     |
|-------------------|---------------------|
| Mass:             | 1577.688            |
| m/z:              | System.Collections. |
| Charge:           | System.Collections. |
| Retentiontime:    | System.Collections. |
| Score:            | 109.1452            |
| Mass Error [ppm]: | 0.29446             |
| PEP:              | 8.4198E-06          |
| Precursor Type:   | MULTI               |

#### general information

|                       |           |
|-----------------------|-----------|
| Annotation:           | 10 of 12  |
| AminoAcids Coverag    | 83 %      |
| Intensity Coverage:   | 37 %      |
| Protein Localisation: | 79 ... 90 |

| a ion           |          | b ion           |          |    |     |    | $\gamma$ ion    |           | $\gamma^{2+}$ ion |           |
|-----------------|----------|-----------------|----------|----|-----|----|-----------------|-----------|-------------------|-----------|
| $\Delta$ dalton | mass     | $\Delta$ dalton | mass     |    | seq |    | $\Delta$ dalton | mass      | $\Delta$ dalton   | mass      |
|                 | 159.0917 |                 | 187.0866 | 1  | W   | 11 |                 |           |                   |           |
| +0.165013       | 274.1186 | -0.058967       | 302.1135 | 2  | D   | 10 | 1400.63         |           | 1400.63           |           |
|                 | 402.1772 | -0.063834       | 430.1721 | 3  | Q   | 9  | 1285.603        |           | 1285.603          |           |
|                 | 516.2201 | +0.135549       | 544.215  | 4  | N   | 8  | 1157.544        |           | 1157.544          |           |
|                 | 613.2729 |                 | 641.2678 | 5  | P   | 7  | 1043.501        | +0.101899 | 1043.501          |           |
|                 | 780.2712 |                 | 808.2662 | 6  | S   | 6  | 946.4485        | +0.150695 | 473.7279          | -0.217139 |
|                 | 909.3138 |                 | 937.3088 | 7  | E   | 5  | 779.4501        |           | 779.4501          |           |
|                 | 1022.398 |                 | 1050.393 | 8  | I   | 4  | 650.4075        | +0.126706 | 650.4075          |           |
|                 | 1178.499 | -0.055085       | 1206.494 | 9  | R   | 3  | 537.3235        | +0.111282 | 537.3235          |           |
|                 | 1275.552 |                 | 1303.547 | 10 | P   | 2  | 381.2224        | +0.046988 | 381.2224          |           |
|                 | 1404.594 | +0.104807       | 1432.589 | 11 | E   | 1  | 284.1696        |           | 284.1696          |           |
|                 |          |                 |          | 12 | K   | 0  | 155.127         |           | 155.127           |           |

Source: 20120530\_VR\_Bsu\_TripleSILAC\_pWTPPrkCPrpC\_F05  
 Scannumber: 6632  
 Protein: BSU00480; yabj  
 Peptide Score: 81.62  
 Method: ITMS; CID; 3

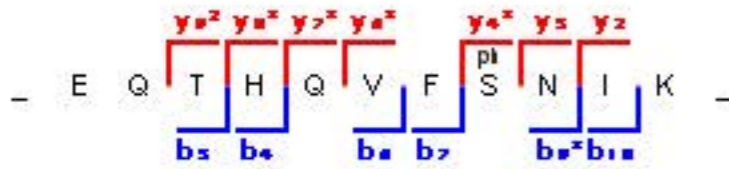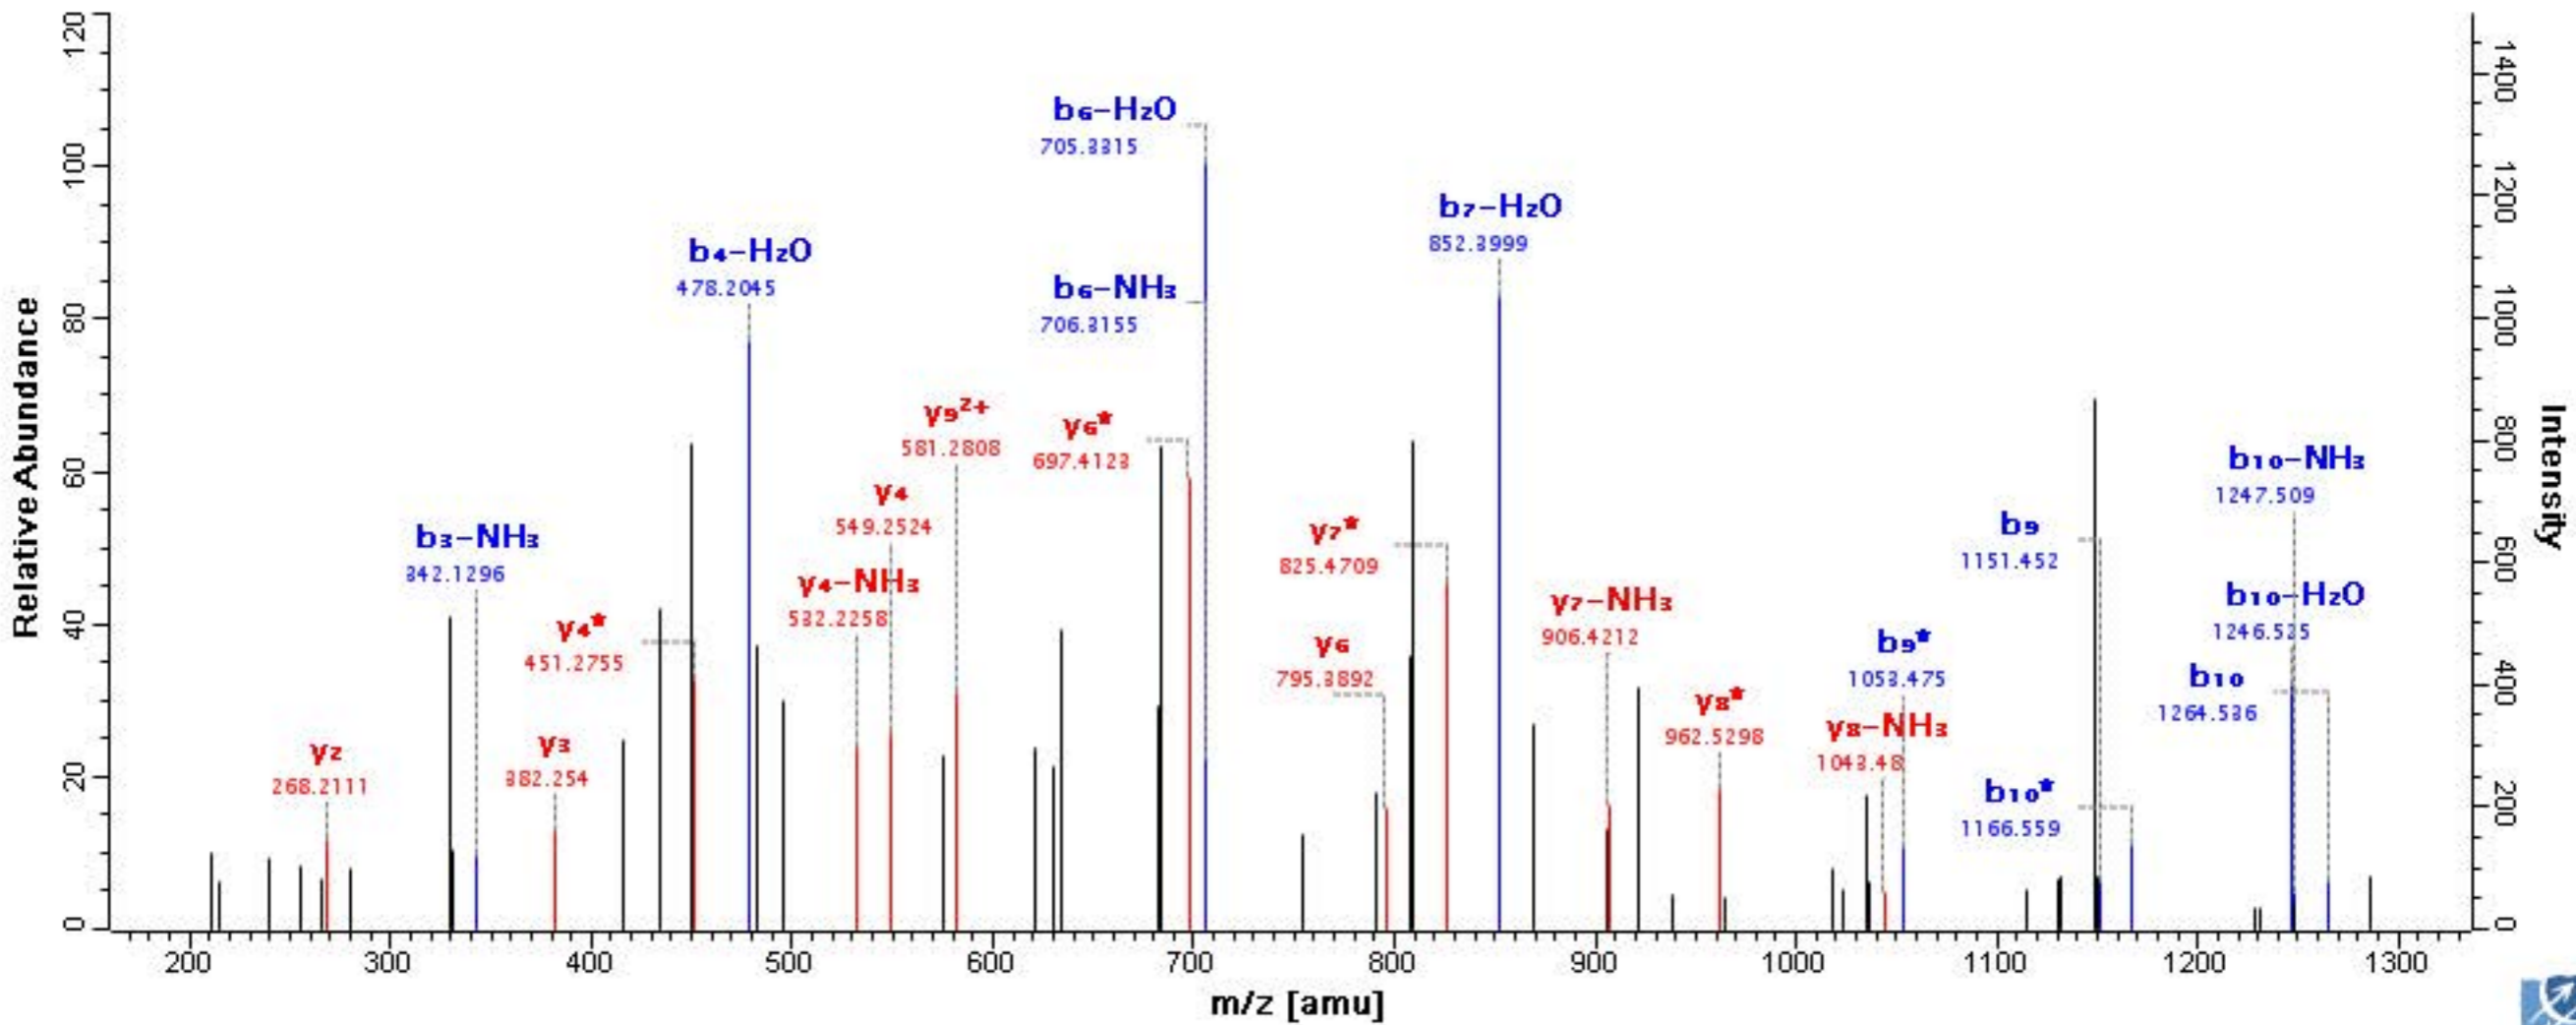

#### precursor information

|                   |                     |
|-------------------|---------------------|
| Mass:             | 1409.63389          |
| m/z:              | System.Collections. |
| Charge:           | System.Collections. |
| Retentiontime:    | System.Collections. |
| Score:            | 81.62486            |
| Mass Error [ppm]: | -0.10847            |
| PEP:              | 0.0023248           |
| Precursor Type:   | MULTI               |

#### general information

|                       |           |
|-----------------------|-----------|
| Annotation:           | 8 of 11   |
| AminoAcids Coverag    | 73 %      |
| Intensity Coverage:   | 43 %      |
| Protein Localisation: | 48 ... 58 |

| b ion           |              |    |     |    | y ion           |            | $y^{2+}$ ion    |            |
|-----------------|--------------|----|-----|----|-----------------|------------|-----------------|------------|
| $\Delta$ dalton | mass         |    | seq |    | $\Delta$ dalton | mass       | $\Delta$ dalton | mass       |
|                 | 130.04986956 | 1  | E   | 10 |                 |            |                 |            |
|                 | 258.10844707 | 2  | Q   | 9  | 1289.6129264    |            | 1289.6129264    |            |
|                 | 359.15612555 | 3  | T   | 8  | 1161.5543489    |            | 581.28081269    | +0.0424295 |
|                 | 496.21503741 | 4  | H   | 7  | 1060.5066704    |            | 1060.5066704    |            |
|                 | 624.27361492 | 5  | Q   | 6  | 923.44775857    |            | 923.44775857    |            |
|                 | 723.34202884 | 6  | V   | 5  | 795.38918106    | +0.0563756 | 795.38918106    |            |
|                 | 870.41044275 | 7  | F   | 4  | 696.32076715    |            | 696.32076715    |            |
|                 | 1037.4088016 | 8  | S   | 3  | 549.25235323    | +0.0132107 | 549.25235323    |            |
| +0.2017134      | 1151.451729  | 9  | N   | 2  | 382.25399441    | +0.2165256 | 382.25399441    |            |
| -0.0022237      | 1264.535793  | 10 | I   | 1  | 268.21106696    | +0.1900561 | 268.21106696    |            |
|                 |              | 11 | K   | 0  | 155.12700298    |            | 155.12700298    |            |

Source: 20120530\_VR\_Bsu\_TripleSILAC\_pWTPPrkCPrpC\_F05  
 Scannumber: 7118  
 Protein: BSU13180; metC; metE  
 Peptide Score: 131.69  
 Method: ITMS; CID; 3

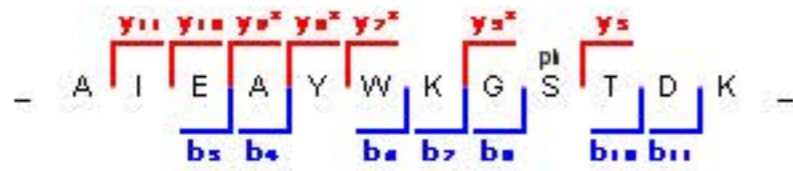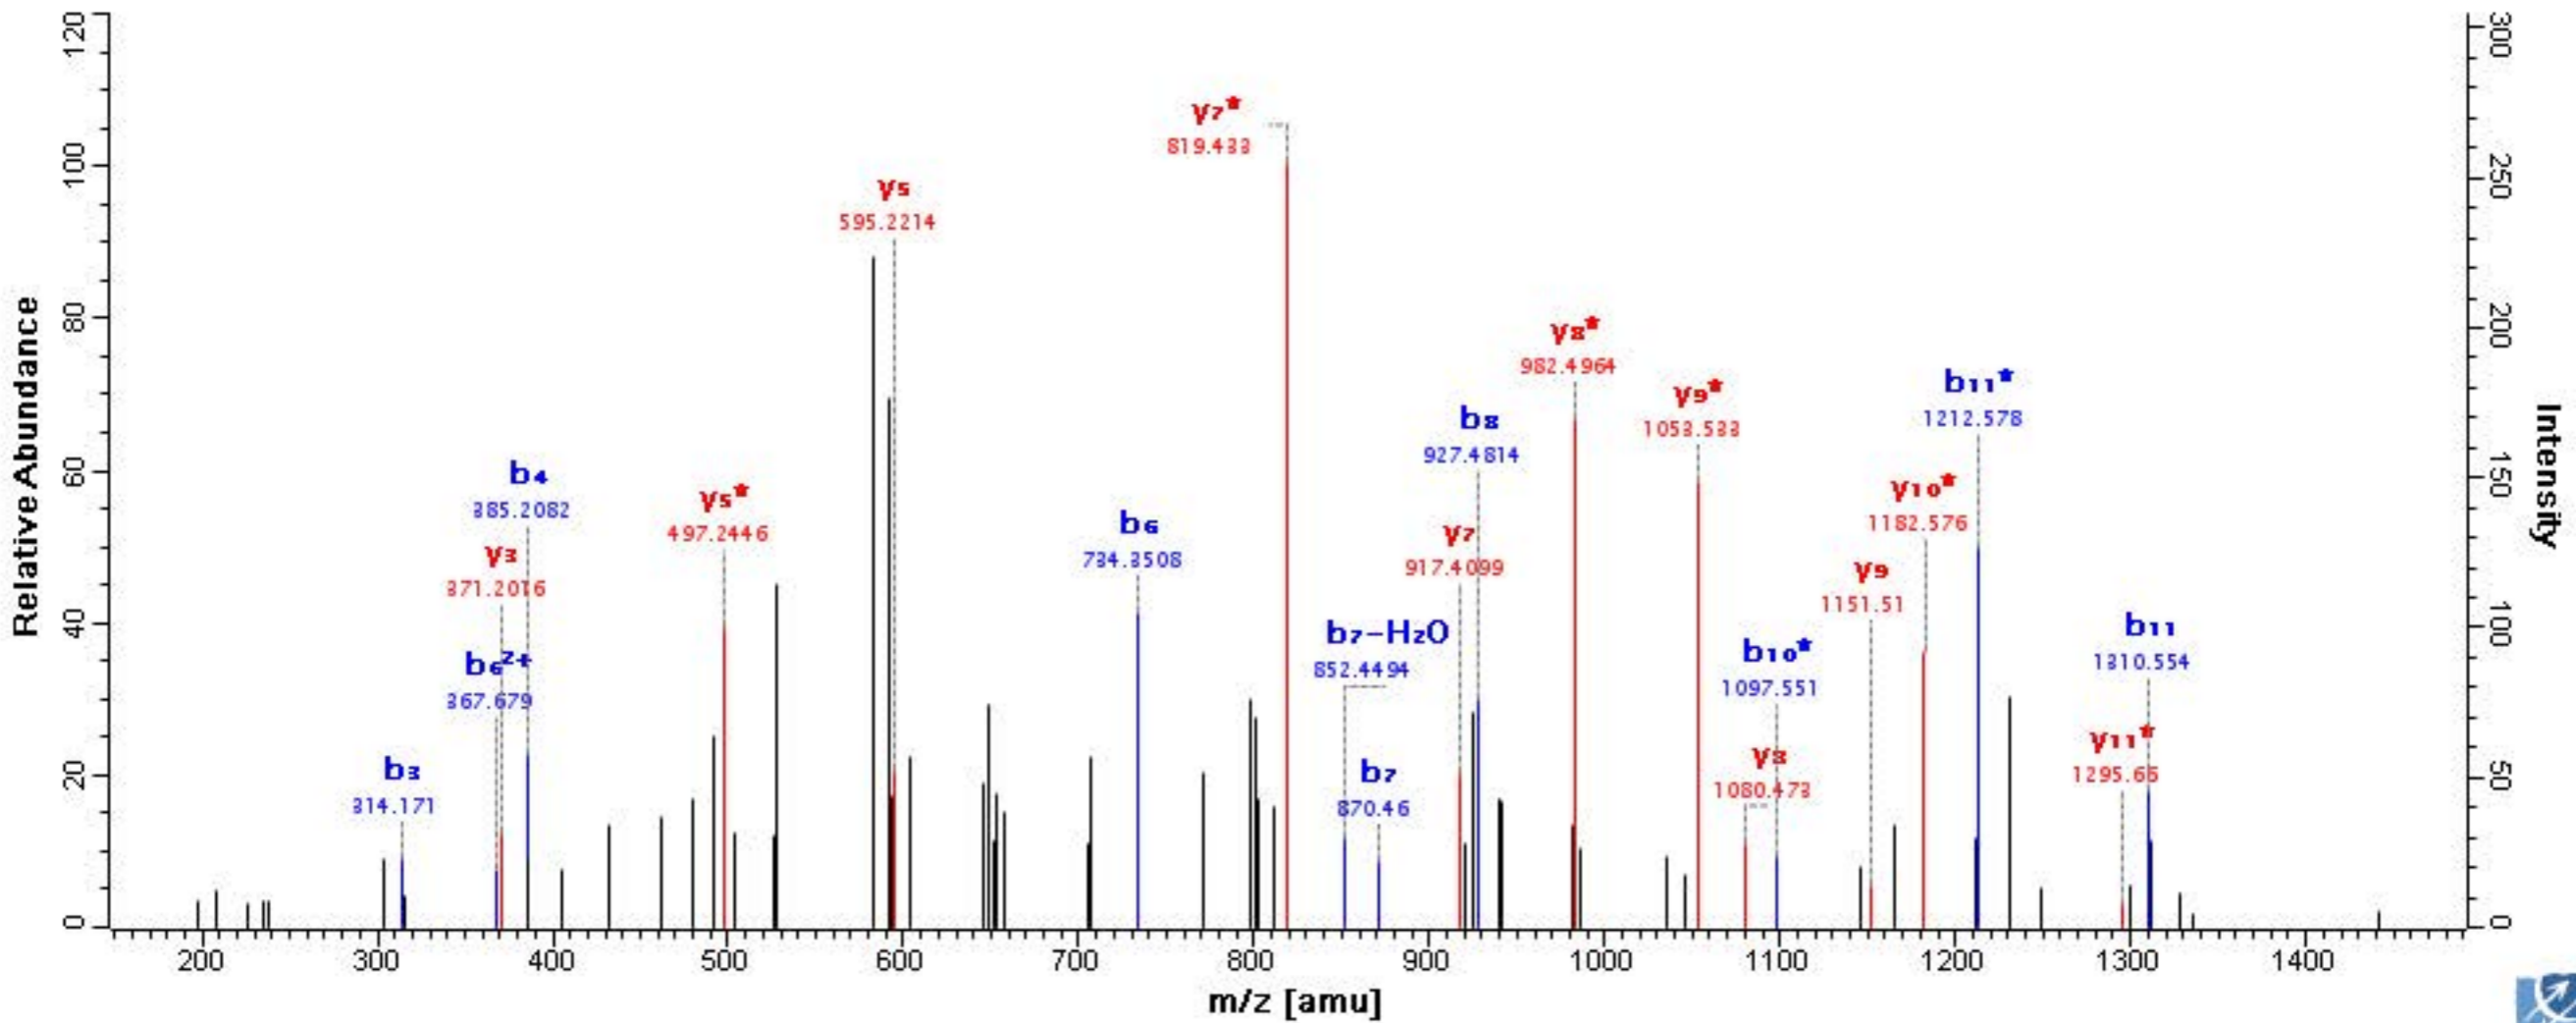

#### precursor information

|                   |                     |
|-------------------|---------------------|
| Mass:             | 1447.6384           |
| m/z:              | System.Collections. |
| Charge:           | System.Collections. |
| Retentiontime:    | System.Collections. |
| Score:            | 131.6914            |
| Mass Error [ppm]: | -0.04008            |
| PEP:              | 1.9598E-11          |
| Precursor Type:   | MULTI               |

#### general information

|                       |           |
|-----------------------|-----------|
| Annotation:           | 9 of 12   |
| AminoAcids Coverag    | 75 %      |
| Intensity Coverage:   | 41 %      |
| Protein Localisation: | 23 ... 34 |

| b <sup>2+</sup> ion |              | b ion      |              |     | y ion |          |              |            |
|---------------------|--------------|------------|--------------|-----|-------|----------|--------------|------------|
| Δ dalton            | mass         | Δ dalton   | mass         | seq |       | Δ dalton | mass         |            |
|                     | 72.044390254 |            | 72.044390254 | 1   | A     | 11       |              |            |
|                     | 185.12845423 |            | 185.12845423 | 2   | I     | 10       | 1393.6370212 |            |
|                     | 314.17104733 | +0.0533789 | 314.17104733 | 3   | E     | 9        | 1280.5529572 |            |
|                     | 385.20816112 | -0.0637519 | 385.20816112 | 4   | A     | 8        | 1151.5103641 | -0.2164188 |
|                     | 548.27148966 |            | 548.27148966 | 5   | Y     | 7        | 1080.4732504 | +0.0848551 |
| -0.4084707          | 367.67903954 | -0.1077606 | 734.35080261 | 6   | W     | 6        | 917.40992182 | +0.0549219 |
|                     | 870.45996444 | -0.0441319 | 870.45996444 | 7   | K     | 5        | 731.33060886 |            |
|                     | 927.48142817 | +0.294878  | 927.48142817 | 8   | G     | 4        | 595.22144703 | +0.2043953 |
|                     | 1094.479787  |            | 1094.479787  | 9   | S     | 3        | 538.19998331 |            |
|                     | 1195.5274655 |            | 1195.5274655 | 10  | T     | 2        | 371.20162449 | +0.1468252 |
|                     | 1310.5544085 | +0.0181013 | 1310.5544085 | 11  | D     | 1        | 270.15394602 |            |
|                     |              |            |              | 12  | K     | 0        | 155.12700298 |            |

Source: 201 20530\_VR\_Bsu\_TripleSILAC\_pWTPrkCPrpC\_F05  
 Scannumber: 7203  
 Protein: BSU1 3900; ptsH  
 Peptide Score: 92.29  
 Method: ITMS; CID; 3

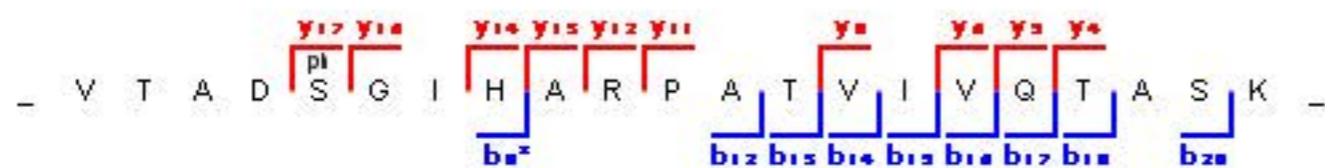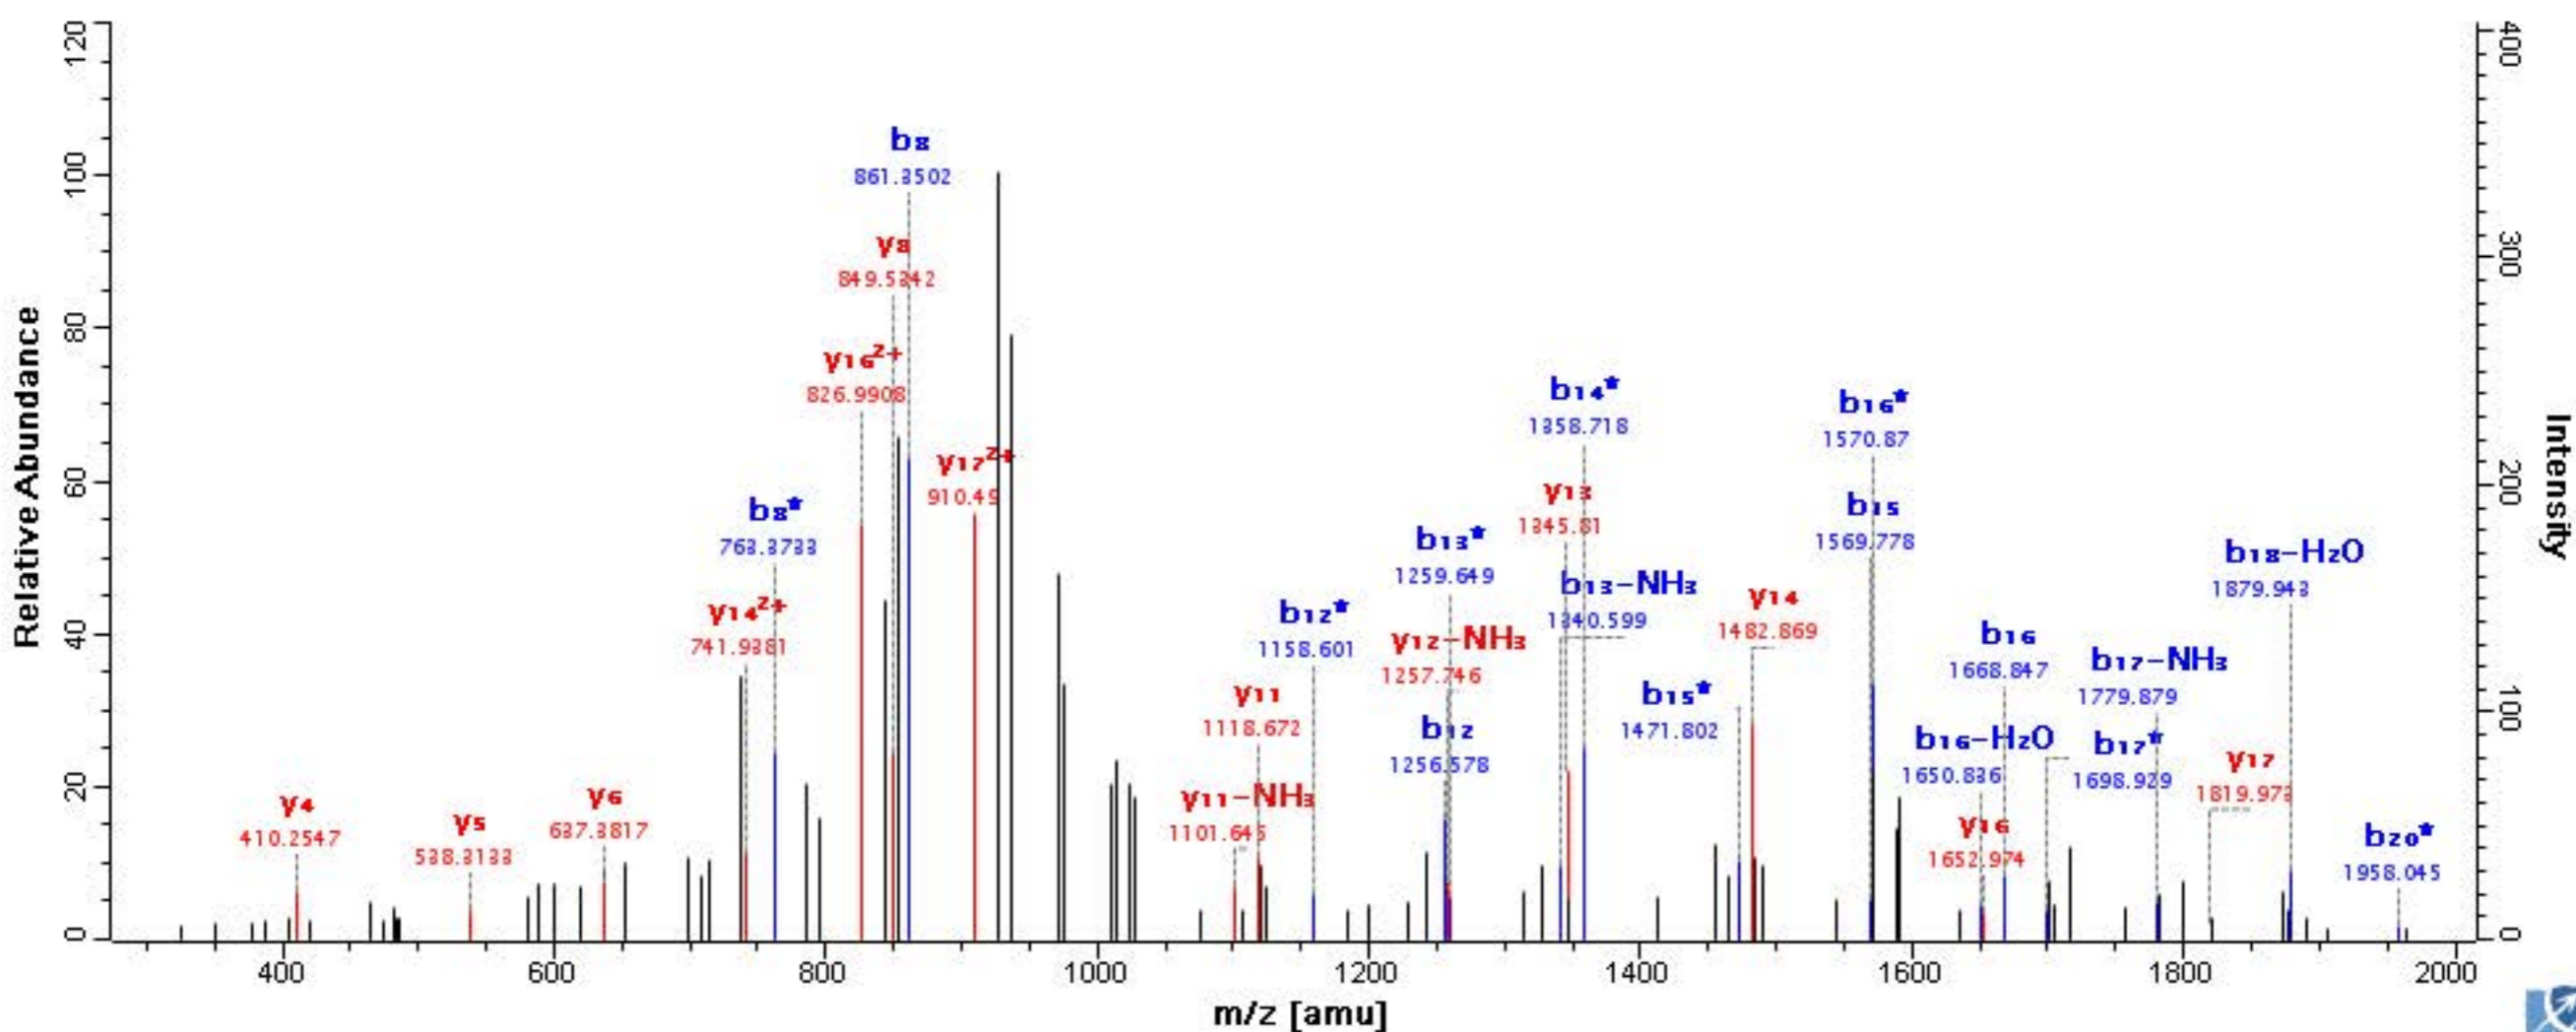

#### precursor information

|                   |                     |
|-------------------|---------------------|
| Mass:             | 2201.12068          |
| m/z:              | System.Collections. |
| Charge:           | System.Collections. |
| Retentiontime:    | System.Collections. |
| Score:            | 92.28931            |
| Mass Error [ppm]: | 0.062152            |
| PEP:              | 1.0087E-06          |
| Precursor Type:   | MULTI               |

| b ion      |              |    |     |    | y ion        |            | y <sup>2+</sup> ion |            |
|------------|--------------|----|-----|----|--------------|------------|---------------------|------------|
| Δ dalton   | mass         |    | seq |    | Δ dalton     | mass       | Δ dalton            | mass       |
|            | 100.07569038 | 1  | V   | 20 |              |            |                     |            |
|            | 201.12336886 | 2  | T   | 19 | 2107.0845158 |            | 2107.0845158        |            |
|            | 272.16048264 | 3  | A   | 18 | 2006.0368373 |            | 2006.0368373        |            |
|            | 387.18742568 | 4  | D   | 17 | 1934.9997235 |            | 1934.9997235        |            |
|            | 554.1857845  | 5  | S   | 16 | 1819.9727805 | +0.3820779 | 910.49002847        | +0.1226424 |
|            | 611.20724822 | 6  | G   | 15 | 1652.9744216 | -0.1116287 | 826.99084906        | +0.2394976 |
|            | 724.2913122  | 7  | I   | 14 | 1595.9529579 |            | 1595.9529579        |            |
| +0.238399  | 861.35022406 | 8  | H   | 13 | 1482.8688939 | -0.0667699 | 741.9380852         | +0.3323005 |
|            | 932.38733785 | 9  | A   | 12 | 1345.8099821 | +0.2886507 | 1345.8099821        |            |
|            | 1088.4884489 | 10 | R   | 11 | 1274.7728683 |            | 1274.7728683        |            |
|            | 1185.5412127 | 11 | P   | 10 | 1118.6717573 | +0.0411334 | 1118.6717573        |            |
| +0.0478942 | 1256.5783265 | 12 | A   | 9  | 1021.6189934 |            | 1021.6189934        |            |
|            | 1357.626005  | 13 | T   | 8  | 950.58187962 |            | 950.58187962        |            |
|            | 1456.6944189 | 14 | V   | 7  | 849.53420115 | +0.1824737 | 849.53420115        |            |
| +0.0253501 | 1569.7784829 | 15 | I   | 6  | 750.46578723 |            | 750.46578723        |            |
| -0.0678441 | 1668.8468968 | 16 | V   | 5  | 637.38172325 | +0.1219389 | 637.38172325        |            |
|            | 1796.9054743 | 17 | Q   | 4  | 538.31330934 | -0.0260169 | 538.31330934        |            |
|            | 1897.9531528 | 18 | T   | 3  | 410.25473183 | -0.1784379 | 410.25473183        |            |
|            | 1968.9902666 | 19 | A   | 2  | 309.20705335 |            | 309.20705335        |            |
|            | 2056.022295  | 20 | S   | 1  | 238.16993956 |            | 238.16993956        |            |
|            |              | 21 | K   | 0  | 151.13791115 |            | 151.13791115        |            |

#### general information

|                       |          |
|-----------------------|----------|
| Annotation:           | 14 of 21 |
| AminoAcids Coverag    | 67 %     |
| Intensity Coverage:   | 33 %     |
| Protein Localisation: | 8 ... 28 |

Source: 20120530\_VR\_Bsu\_TripleSILAC\_pWTPrkCPrpC\_F05  
 Scannumber: 7567  
 Protein: BSU27320; greA  
 Peptide Score: 88.13  
 Method: ITMS; CID; 3

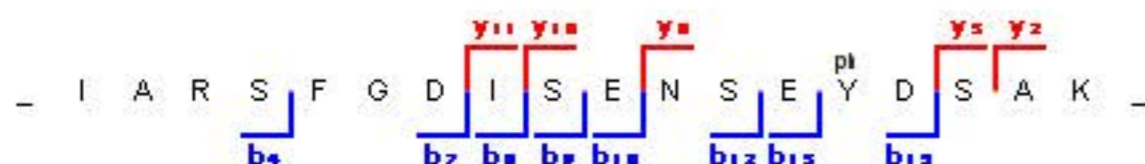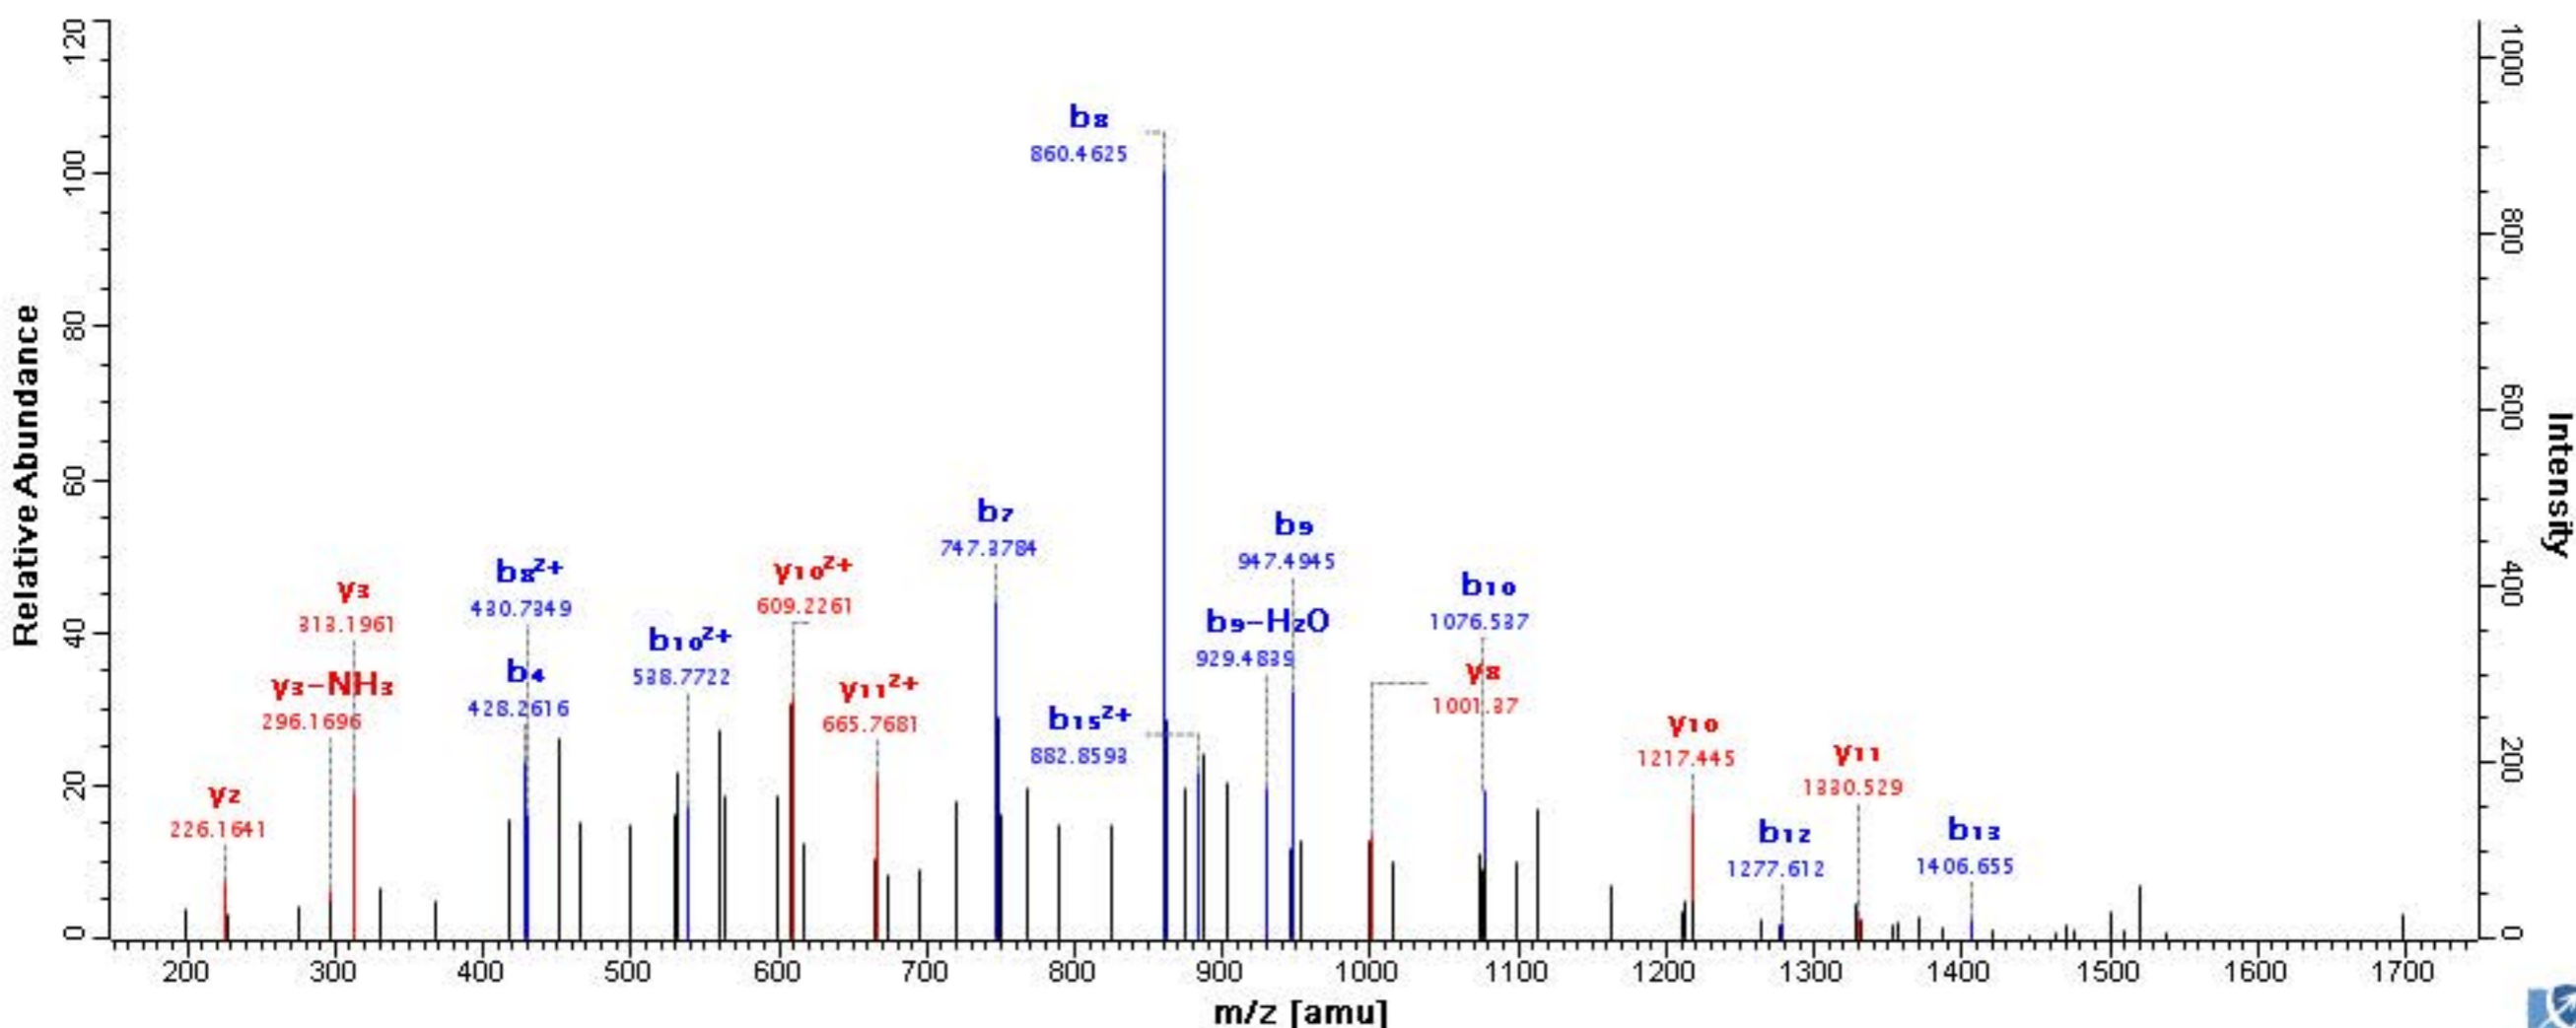

#### precursor information

|                   |                     |
|-------------------|---------------------|
| Mass:             | 2067.87791          |
| m/z:              | System.Collections. |
| Charge:           | System.Collections. |
| Retentiontime:    | System.Collections. |
| Score:            | 88.13289            |
| Mass Error [ppm]: | -0.35502            |
| PEP:              | 5.8137E-07          |
| Precursor Type:   | MULTI               |

#### general information

|                       |           |
|-----------------------|-----------|
| Annotation:           | 11 of 18  |
| AminoAcids Coverage:  | 61 %      |
| Intensity Coverage:   | 39 %      |
| Protein Localisation: | 38 ... 55 |

| b <sup>2+</sup> ion |          | b ion     |          | seq |   |    | y ion    |           | y <sup>2+</sup> ion |           |
|---------------------|----------|-----------|----------|-----|---|----|----------|-----------|---------------------|-----------|
| Δ dalton            | mass     | Δ dalton  | mass     |     |   |    | Δ dalton | mass      | Δ dalton            | mass      |
|                     | 114.0913 |           | 114.0913 | 1   | I | 17 |          |           |                     |           |
|                     | 185.1285 |           | 185.1285 | 2   | A | 16 | 1963.816 |           | 1963.816            |           |
|                     | 341.2296 |           | 341.2296 | 3   | R | 15 | 1892.779 |           | 1892.779            |           |
|                     | 428.2616 | -0.011288 | 428.2616 | 4   | S | 14 | 1736.678 |           | 1736.678            |           |
|                     | 575.33   |           | 575.33   | 5   | F | 13 | 1649.646 |           | 1649.646            |           |
|                     | 632.3515 |           | 632.3515 | 6   | G | 12 | 1502.577 |           | 1502.577            |           |
|                     | 747.3784 | +0.066715 | 747.3784 | 7   | D | 11 | 1445.556 |           | 1445.556            |           |
| +0.237413           | 430.7349 | -0.074234 | 860.4625 | 8   | I | 10 | 1330.529 | +0.236277 | 665.7681            | +0.208006 |
|                     | 947.4945 | -0.0802   | 947.4945 | 9   | S | 9  | 1217.445 | -0.037813 | 609.2261            | +0.180397 |
| +0.121855           | 538.7722 | +0.126719 | 1076.537 | 10  | E | 8  | 1130.413 |           | 1130.413            |           |
|                     | 1190.58  |           | 1190.58  | 11  | N | 7  | 1001.37  | +0.017704 | 1001.37             |           |
|                     | 1277.612 | +0.039189 | 1277.612 | 12  | S | 6  | 887.3274 |           | 887.3274            |           |
|                     | 1406.655 | +0.323256 | 1406.655 | 13  | E | 5  | 800.2953 |           | 800.2953            |           |
|                     | 1649.684 |           | 1649.684 | 14  | Y | 4  | 671.2527 |           | 671.2527            |           |
| -0.053355           | 882.8593 |           | 1764.711 | 15  | D | 3  | 428.2231 |           | 428.2231            |           |
|                     | 1851.743 |           | 1851.743 | 16  | S | 2  | 313.1961 | +0.082541 | 313.1961            |           |
|                     | 1922.78  |           | 1922.78  | 17  | A | 1  | 226.1641 | +0.21511  | 226.1641            |           |
|                     |          |           |          | 18  | K | 0  | 155.127  |           | 155.127             |           |



Source: 20120530\_VR\_Bsu\_TripleSILAC\_pWTPPrkCPrpC\_F05  
 Scannumber: 8868  
 Protein: BSU15590; sat; ylnB  
 Peptide Score: 67.22  
 Method: ITMS; CID; 3

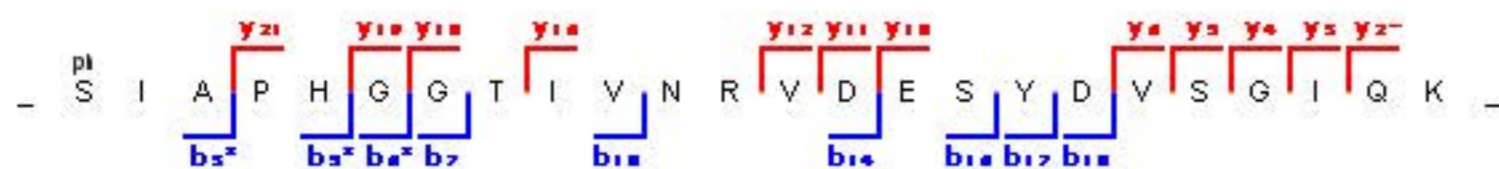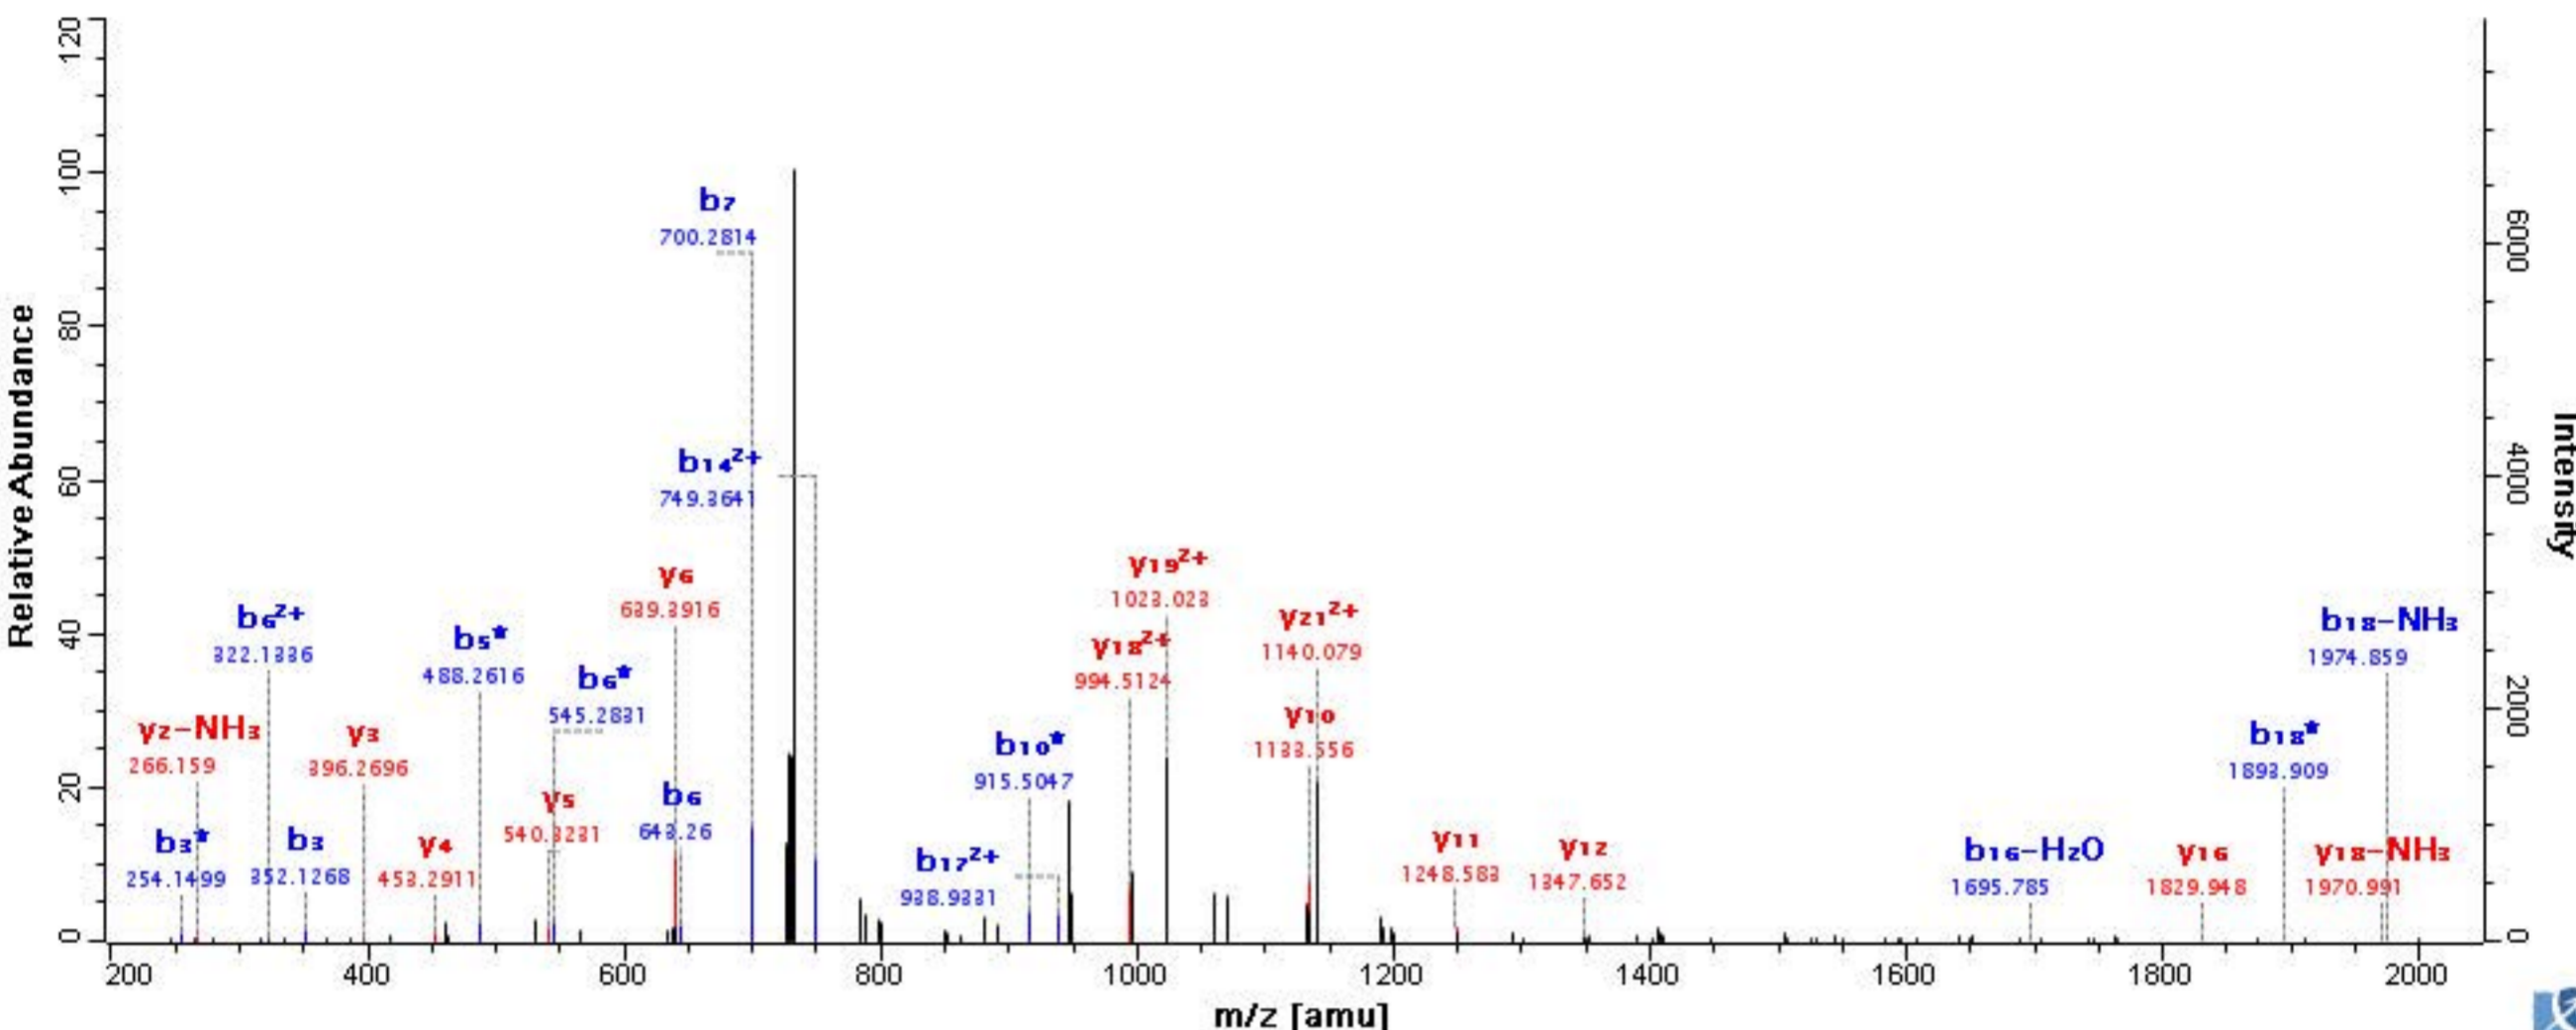

**precursor information**

|                   |                     |
|-------------------|---------------------|
| Mass:             | 2621.2481           |
| m/z:              | System.Collections. |
| Charge:           | System.Collections. |
| Retentiontime:    | System.Collections. |
| Score:            | 67.21661            |
| Mass Error [ppm]: | -0.21279            |
| PEP:              | 8.8529E-05          |
| Precursor Type:   | MULTI               |

| b <sup>2+</sup> ion |          | b ion     |          | seq |   |    | y ion    |           | y <sup>2+</sup> ion |           |
|---------------------|----------|-----------|----------|-----|---|----|----------|-----------|---------------------|-----------|
| Δ dalton            | mass     | Δ dalton  | mass     |     |   |    | Δ dalton | mass      | Δ dalton            | mass      |
|                     | 168.0056 |           | 168.0056 | 1   | S | 23 |          |           |                     |           |
|                     | 281.0897 |           | 281.0897 | 2   | I | 22 | 2463.272 |           | 2463.272            |           |
|                     | 352.1268 | +0.094867 | 352.1268 | 3   | A | 21 | 2350.188 |           | 2350.188            |           |
|                     | 449.1796 |           | 449.1796 | 4   | P | 20 | 2279.151 |           | 1140.079            | -0.054035 |
|                     | 586.2385 |           | 586.2385 | 5   | H | 19 | 2182.098 |           | 2182.098            |           |
| +0.07476            | 322.1336 | +0.0061   | 643.26   | 6   | G | 18 | 2045.039 |           | 1023.023            | +0.152132 |
|                     | 700.2814 | +0.313066 | 700.2814 | 7   | G | 17 | 1988.017 |           | 994.5124            | +0.117698 |
|                     | 801.3291 |           | 801.3291 | 8   | T | 16 | 1930.996 |           | 1930.996            |           |
|                     | 914.4132 |           | 914.4132 | 9   | I | 15 | 1829.948 | +0.044725 | 1829.948            |           |
|                     | 1013.482 |           | 1013.482 | 10  | V | 14 | 1716.864 |           | 1716.864            |           |
|                     | 1127.525 |           | 1127.525 | 11  | N | 13 | 1617.796 |           | 1617.796            |           |
|                     | 1283.626 |           | 1283.626 | 12  | R | 12 | 1503.753 |           | 1503.753            |           |
|                     | 1382.694 |           | 1382.694 | 13  | V | 11 | 1347.652 | +0.417169 | 1347.652            |           |
| -0.381212           | 749.3641 |           | 1497.721 | 14  | D | 10 | 1248.583 | +0.081897 | 1248.583            |           |
|                     | 1626.764 |           | 1626.764 | 15  | E | 9  | 1133.556 | +0.05049  | 1133.556            |           |
|                     | 1713.796 |           | 1713.796 | 16  | S | 8  | 1004.514 |           | 1004.514            |           |
| -0.186454           | 938.9331 |           | 1876.859 | 17  | Y | 7  | 917.4818 |           | 917.4818            |           |
|                     | 1991.886 |           | 1991.886 | 18  | D | 6  | 754.4185 |           | 754.4185            |           |
|                     | 2090.954 |           | 2090.954 | 19  | V | 5  | 639.3916 | +0.174551 | 639.3916            |           |
|                     | 2177.986 |           | 2177.986 | 20  | S | 4  | 540.3231 | +0.035506 | 540.3231            |           |
|                     | 2235.008 |           | 2235.008 | 21  | G | 3  | 453.2911 | -0.071076 | 453.2911            |           |
|                     | 2348.092 |           | 2348.092 | 22  | I | 2  | 396.2696 | -0.035056 | 396.2696            |           |
|                     | 2476.15  |           | 2476.15  | 23  | Q | 1  | 283.1856 |           | 283.1856            |           |
|                     |          |           |          | 24  | K | 0  | 155.127  |           | 155.127             |           |

**general information**

|                       |          |
|-----------------------|----------|
| Annotation:           | 18 of 24 |
| AminoAcids Coverag    | 75 %     |
| Intensity Coverage:   | 25 %     |
| Protein Localisation: | 2 ... 25 |

Source: 20120530\_VR\_Bsu\_TripleSILAC\_pWTPPrkCPrpC\_F05  
 Scannumber: 9580  
 Protein: BSU39820; htpG; SS92A; yxbB  
 Peptide Score: 64.37  
 Method: ITMS; CID; 3

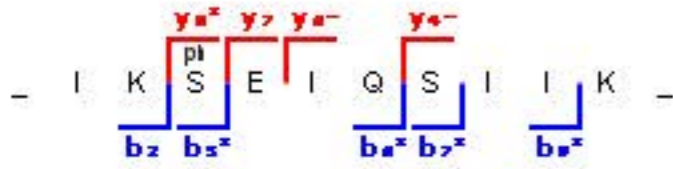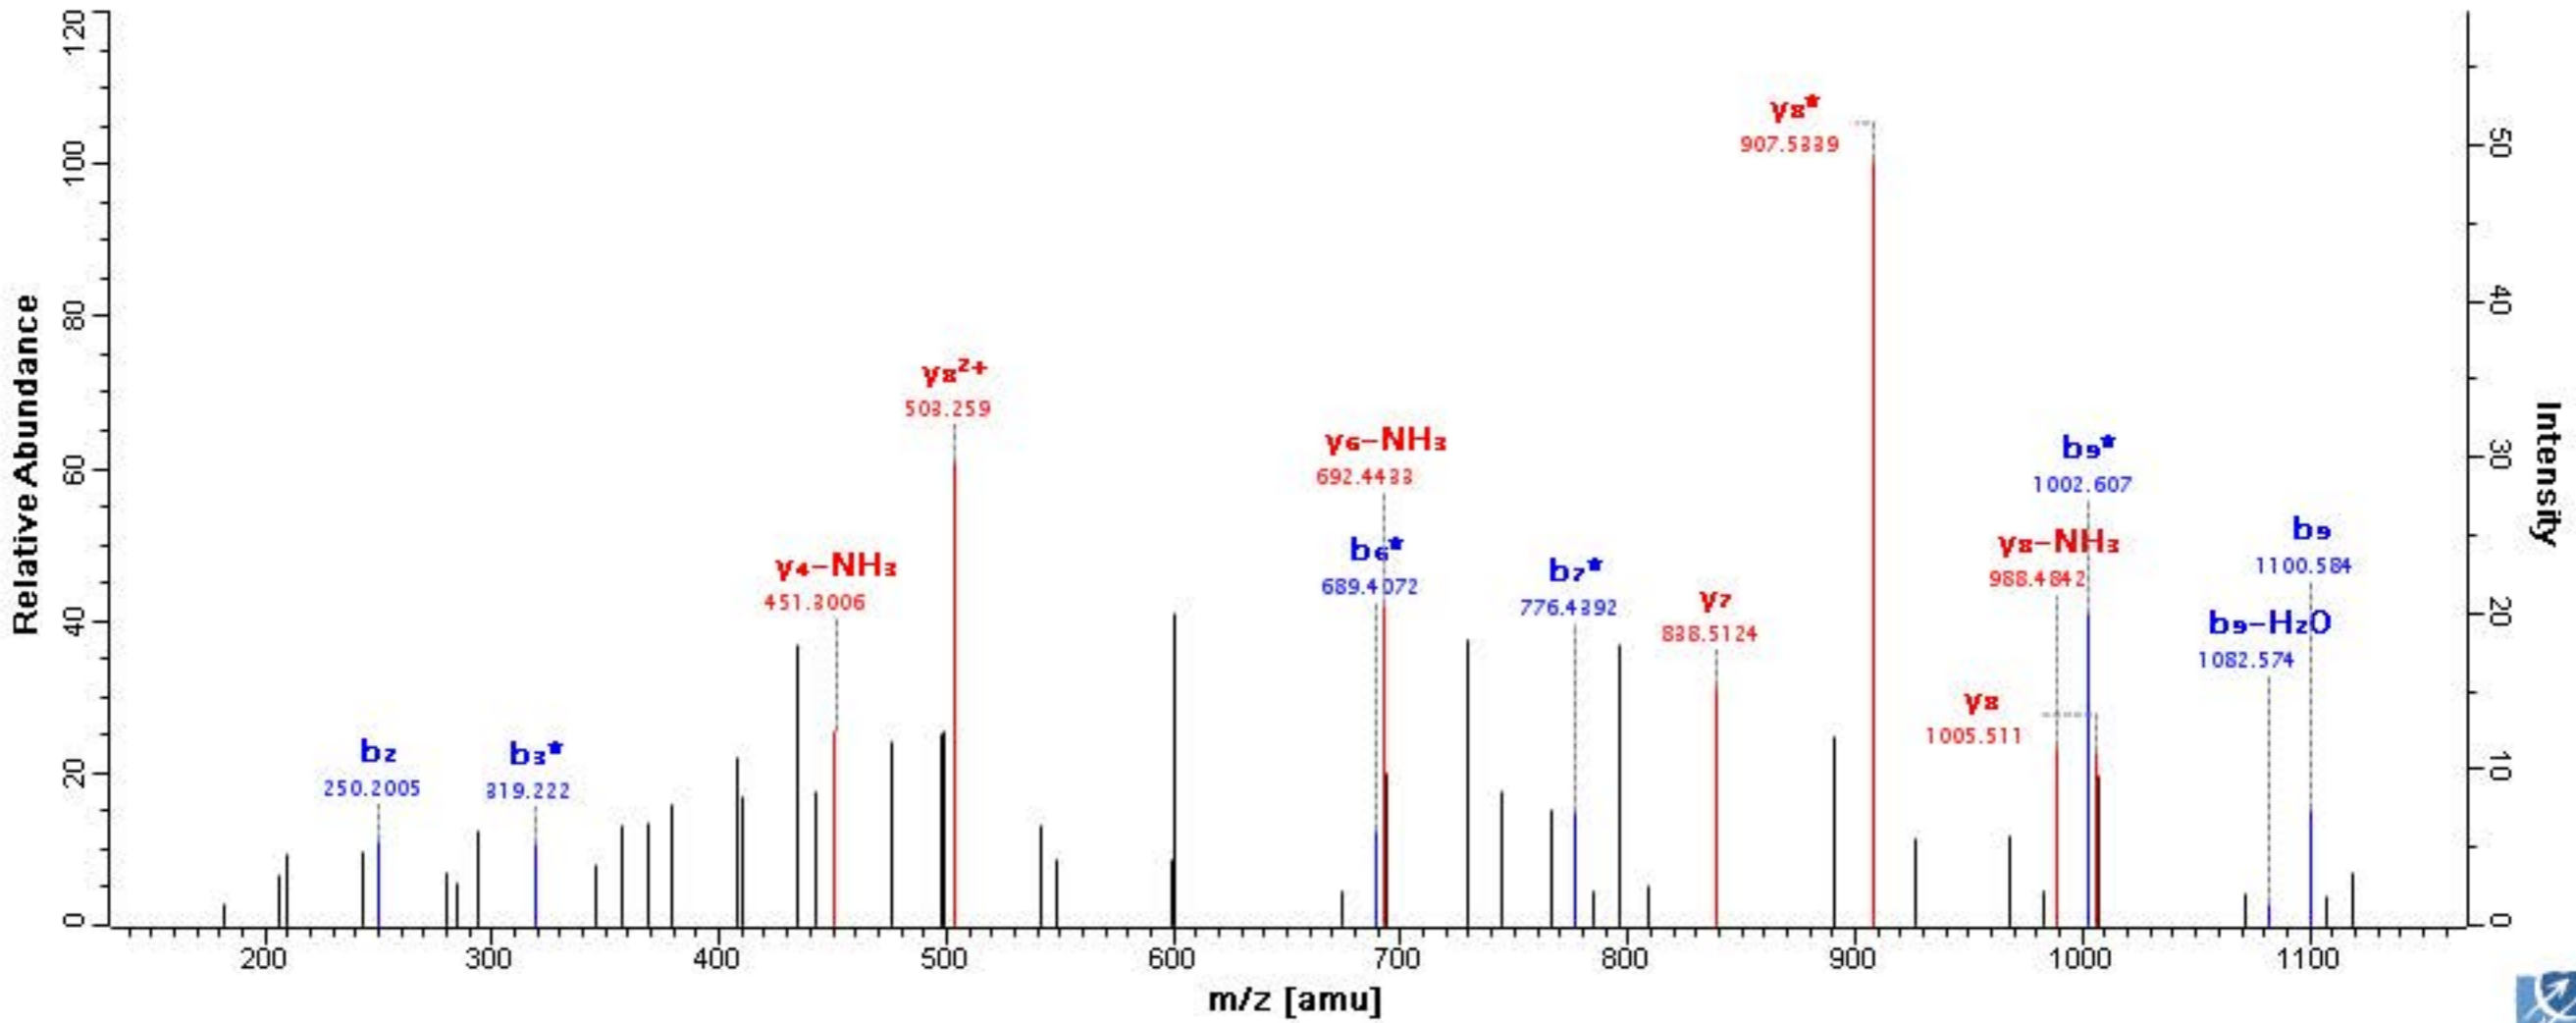

**precursor information**

|                   |                     |
|-------------------|---------------------|
| Mass:             | 1237.66843          |
| m/z:              | System.Collections. |
| Charge:           | System.Collections. |
| Retentiontime:    | System.Collections. |
| Score:            | 64.37389            |
| Mass Error [ppm]: | 0.099407            |
| PEP:              | 0.043481            |
| Precursor Type:   | MULTI               |

**general information**

|                       |             |
|-----------------------|-------------|
| Annotation:           | 7 of 10     |
| AminoAcids Coverage:  | 70 %        |
| Intensity Coverage:   | 42 %        |
| Protein Localisation: | 361 ... 370 |

| b ion      |              |    |     |   | y ion        |            |              | y <sup>2+</sup> ion |  |
|------------|--------------|----|-----|---|--------------|------------|--------------|---------------------|--|
| Δ dalton   | mass         |    | seq |   | Δ dalton     | mass       | Δ dalton     | mass                |  |
|            | 114.09134045 | 1  | I   | 9 |              |            |              |                     |  |
| +0.1619855 | 250.20050228 | 2  | K   | 8 | 1141.6199146 |            | 1141.6199146 |                     |  |
|            | 417.1988611  | 3  | S   | 7 | 1005.5107528 | +0.1113176 | 503.25901461 | +0.0703921          |  |
|            | 546.24145419 | 4  | E   | 6 | 838.51239394 | +0.3244591 | 838.51239394 |                     |  |
|            | 659.32551817 | 5  | I   | 5 | 709.46980085 |            | 709.46980085 |                     |  |
|            | 787.38409568 | 6  | Q   | 4 | 596.38573687 |            | 596.38573687 |                     |  |
|            | 874.41612409 | 7  | S   | 3 | 468.32715935 |            | 468.32715935 |                     |  |
|            | 987.50018807 | 8  | I   | 2 | 381.29513094 |            | 381.29513094 |                     |  |
| -0.2536856 | 1100.5842521 | 9  | I   | 1 | 268.21106696 |            | 268.21106696 |                     |  |
|            |              | 10 | K   | 0 | 155.12700298 |            | 155.12700298 |                     |  |

Source: 20120530\_VR\_Bsu\_TripleSILAC\_pWTPPrkCPrpC\_F07  
 Scannumber: 10768  
 Protein: BSU25870; yqcF  
 Peptide Score: 182.89  
 Method: ITMS; CID; 3

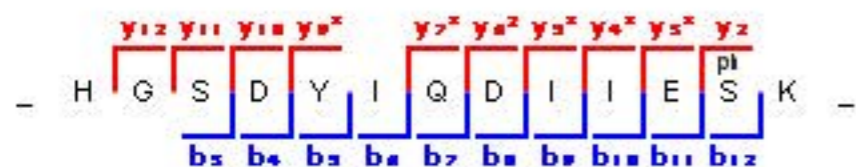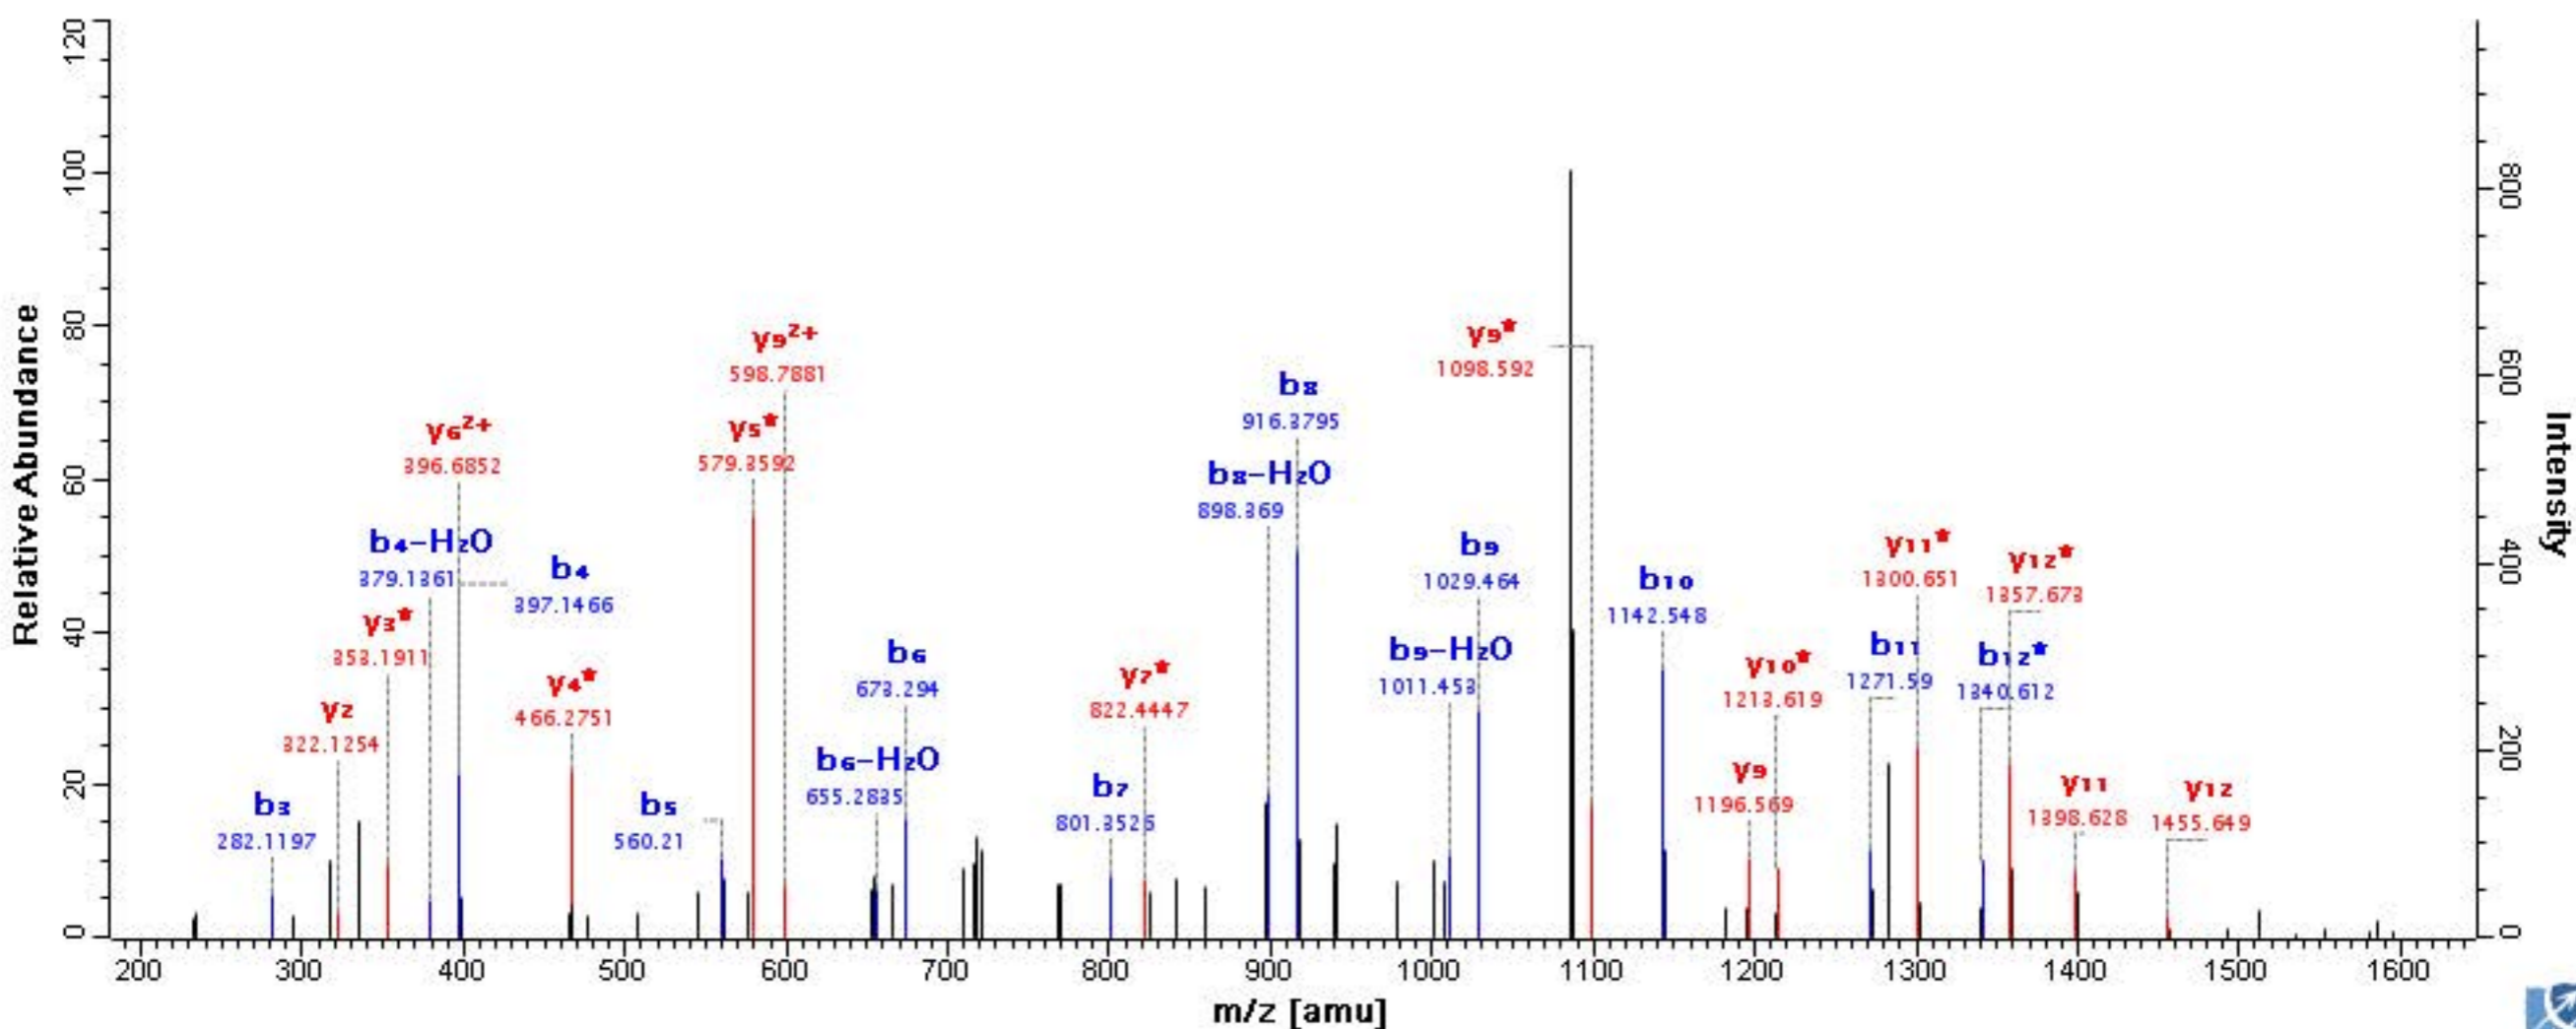

#### precursor information

|                   |                     |
|-------------------|---------------------|
| Mass:             | 1583.68696          |
| m/z:              | System.Collections. |
| Charge:           | System.Collections. |
| Retentiontime:    | System.Collections. |
| Score:            | 182.8864            |
| Mass Error [ppm]: | 0.059133            |
| PEP:              | 1.0181E-35          |
| Precursor Type:   | MULTI               |

#### general information

|                       |             |
|-----------------------|-------------|
| Annotation:           | 11 of 13    |
| AminoAcids Coverag    | 85 %        |
| Intensity Coverage:   | 45 %        |
| Protein Localisation: | 167 ... 179 |

| b ion      |              |    |     |    | y ion        |            | y <sup>2+</sup> ion |            |
|------------|--------------|----|-----|----|--------------|------------|---------------------|------------|
| Δ dalton   | mass         |    | seq |    | Δ dalton     | mass       | Δ dalton            | mass       |
|            | 138.06618833 | 1  | H   | 12 |              |            |                     |            |
|            | 195.08765205 | 2  | G   | 11 | 1455.6494311 | +0.4315015 | 1455.6494311        |            |
| -0.0040799 | 282.11968046 | 3  | S   | 10 | 1398.6279674 | +0.1023793 | 1398.6279674        |            |
| +0.099104  | 397.14662349 | 4  | D   | 9  | 1311.595939  |            | 1311.595939         |            |
| +0.0705045 | 560.20995203 | 5  | Y   | 8  | 1196.5689959 | -0.0520281 | 598.78813619        | +0.347545  |
| +0.1443995 | 673.29401601 | 6  | I   | 7  | 1033.5056674 |            | 1033.5056674        |            |
| +0.1511907 | 801.35259352 | 7  | Q   | 6  | 920.4216034  |            | 920.4216034         |            |
| +0.197856  | 916.37953656 | 8  | D   | 5  | 792.36302589 |            | 396.68515118        | -0.0514842 |
| +0.0835186 | 1029.4636005 | 9  | I   | 4  | 677.33608286 |            | 677.33608286        |            |
| -0.0038413 | 1142.5476645 | 10 | I   | 3  | 564.25201888 |            | 564.25201888        |            |
| +0.1715832 | 1271.5902576 | 11 | E   | 2  | 451.1679549  |            | 451.1679549         |            |
|            | 1438.5886164 | 12 | S   | 1  | 322.1253618  | +0.2249495 | 322.1253618         |            |
|            |              | 13 | K   | 0  | 155.12700298 |            | 155.12700298        |            |

Source: 20120530\_VR\_Bsu\_TripleSILAC\_pWTPrkCPrpC\_F07  
 Scannumber: 3472  
 Protein: BSU13180; metC; metE  
 Peptide Score: 109.21  
 Method: ITMS; CID; 3

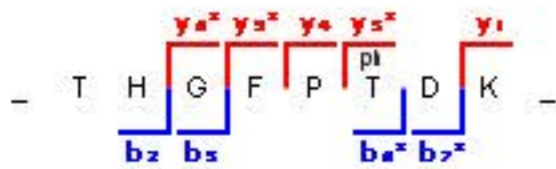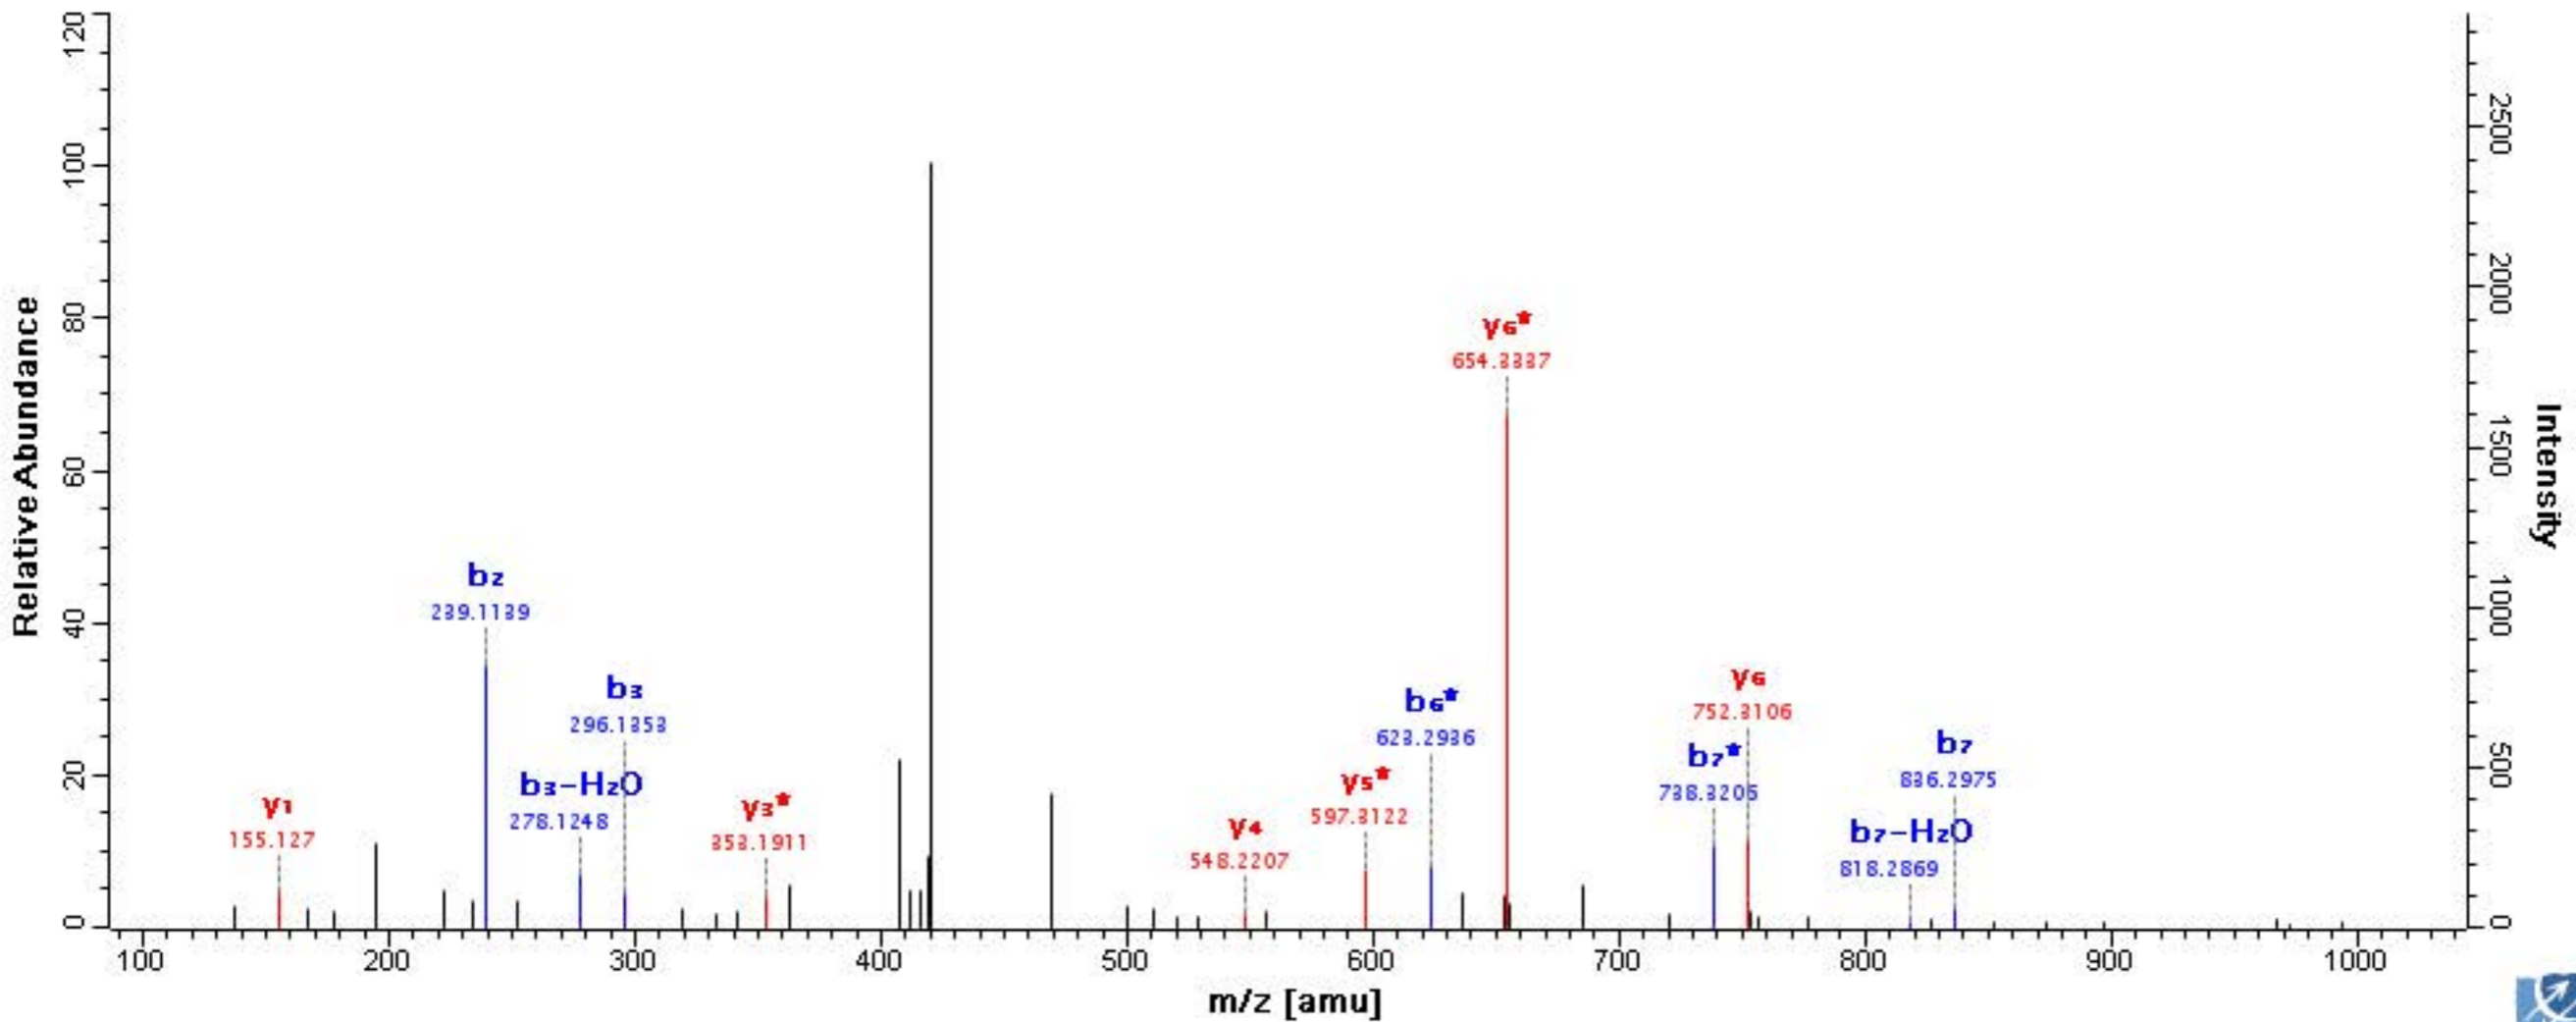

**precursor information**

|                       |                     |
|-----------------------|---------------------|
| Mass:                 | 981.39577           |
| m/z:                  | System.Collections. |
| Charge:               | System.Collections. |
| Retentiontime:        | System.Collections. |
| Score:                | 109.2144            |
| Mass Error [ppm]:     | 0.063753            |
| g PEP:                | 0.0069415           |
| Annotation:           | 7 of 8              |
| AminoAcids Coverag    | 88 %                |
| Intensity Coverage:   | 41 %                |
| Protein Localisation: | 275 ... 282         |

| b ion      |               |   |     |   | y ion         |            |  |
|------------|---------------|---|-----|---|---------------|------------|--|
| Δ dalton   | mass          |   | seq |   | Δ dalton      | mass       |  |
|            | 102.054954941 | 1 | T   | 7 |               |            |  |
| +0.0260716 | 239.113866803 | 2 | H   | 6 | 889.369508252 |            |  |
| +0.0069729 | 296.135330527 | 3 | G   | 5 | 752.31059639  | +0.0880853 |  |
|            | 443.203744443 | 4 | F   | 4 | 695.289132666 |            |  |
|            | 540.256508295 | 5 | P   | 3 | 548.22071875  | +0.0873257 |  |
|            | 721.270517177 | 6 | T   | 2 | 451.167954898 |            |  |
| +0.3716682 | 836.297460209 | 7 | D   | 1 | 270.153946016 |            |  |
|            |               | 8 | K   | 0 | 155.127002984 | +0.169872  |  |

Source: 201 20530\_VR\_Bsu\_TripleSILAC\_pWTPPrkCPrpC\_F07  
 Scannumber: 4244  
 Protein: BSU36250; ywqD  
 Peptide Score: 111.61  
 Method: ITMS; CID; 3

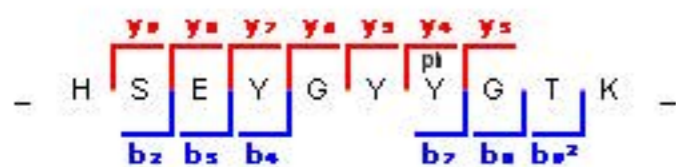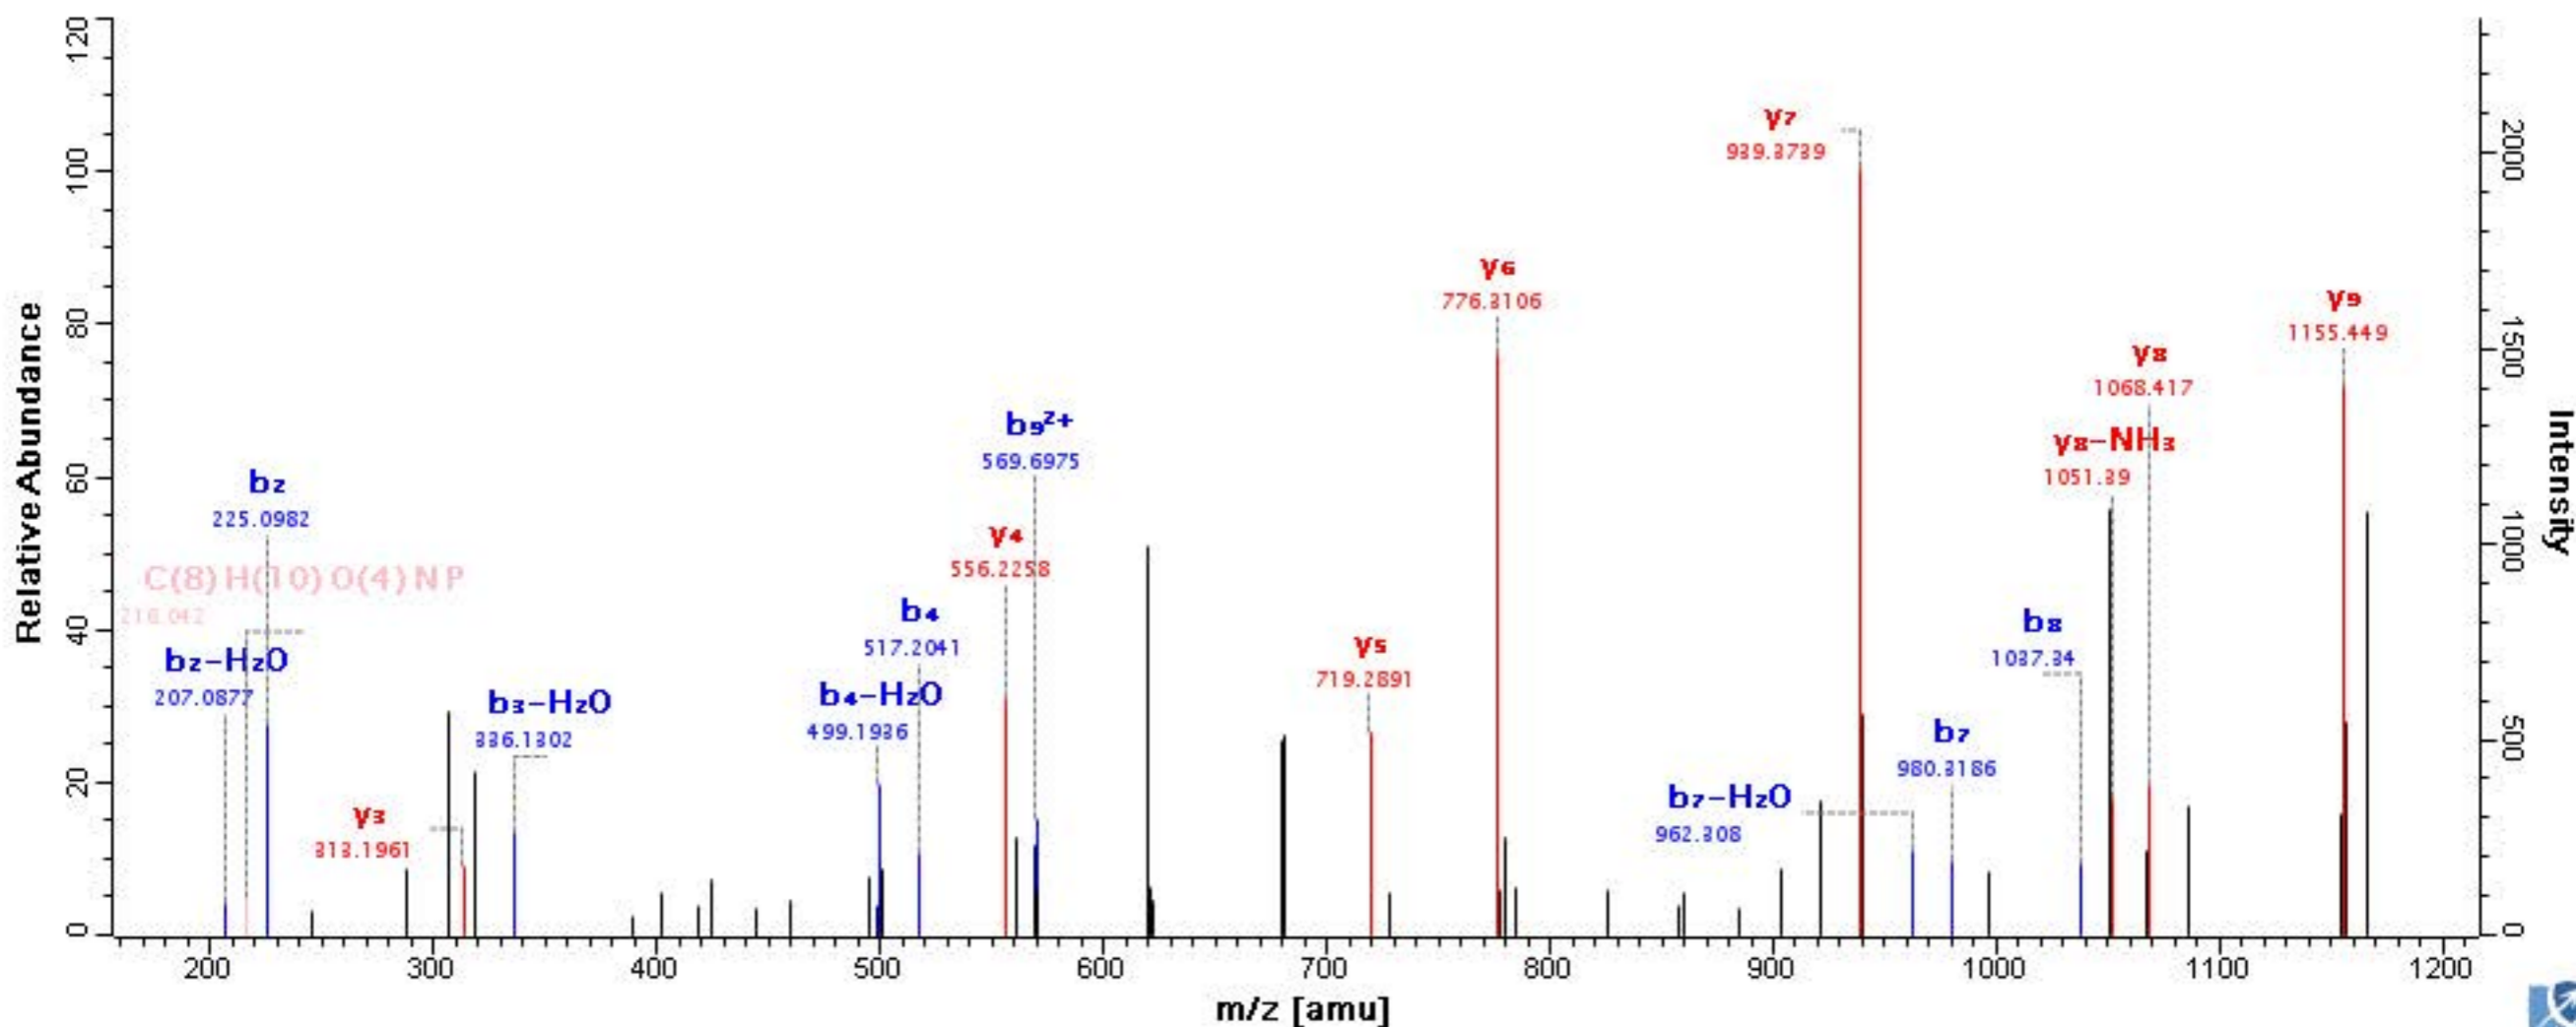

#### precursor information

|                   |                     |
|-------------------|---------------------|
| Mass:             | 1283.48564          |
| m/z:              | System.Collections. |
| Charge:           | System.Collections. |
| Retentiontime:    | System.Collections. |
| Score:            | 111.6068            |
| Mass Error [ppm]: | -0.26825            |
| PEP:              | 0.00011004          |
| Precursor Type:   | MULTI               |

#### general information

|                       |             |
|-----------------------|-------------|
| Annotation:           | 8 of 10     |
| AminoAcids Coverage:  | 80 %        |
| Intensity Coverage:   | 46 %        |
| Protein Localisation: | 222 ... 231 |

| b <sup>2+</sup> ion |              | b ion      |              |     | y ion    |      |                         |
|---------------------|--------------|------------|--------------|-----|----------|------|-------------------------|
| Δ dalton            | mass         | Δ dalton   | mass         | seq | Δ dalton | mass |                         |
|                     | 138.06618833 |            | 138.06618833 | 1   | H        | 9    |                         |
|                     | 225.09821674 | +0.0743296 | 225.09821674 | 2   | S        | 8    | 1155.4485464 +0.0653696 |
|                     | 354.14080984 |            | 354.14080984 | 3   | E        | 7    | 1068.416518 +0.1064312  |
|                     | 517.20413837 | +0.1148314 | 517.20413837 | 4   | Y        | 6    | 939.37392493 +0.0018075 |
|                     | 574.2256021  |            | 574.2256021  | 5   | G        | 5    | 776.31059639 -0.0042609 |
|                     | 737.28893064 |            | 737.28893064 | 6   | Y        | 4    | 719.28913267 +0.0970368 |
|                     | 980.31858958 | +0.0432268 | 980.31858958 | 7   | Y        | 3    | 556.22580413 +0.0616715 |
|                     | 1037.3400533 | +0.0964701 | 1037.3400533 | 8   | G        | 2    | 313.19614518 +0.0728368 |
| +0.3220882          | 569.69750412 |            | 1138.3877318 | 9   | T        | 1    | 256.17468146            |
|                     |              |            |              | 10  | K        | 0    | 155.12700298            |

Source: 201 20530\_VR\_Bsu\_TripleSILAC\_pWTPPrkCPrpC\_F07  
 Scannumber: 6090  
 Protein: BSU1 3330; ykoL  
 Peptide Score: 56.2  
 Method: ITMS; CID; 3

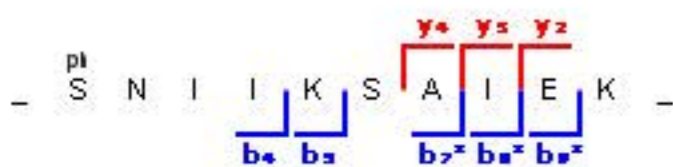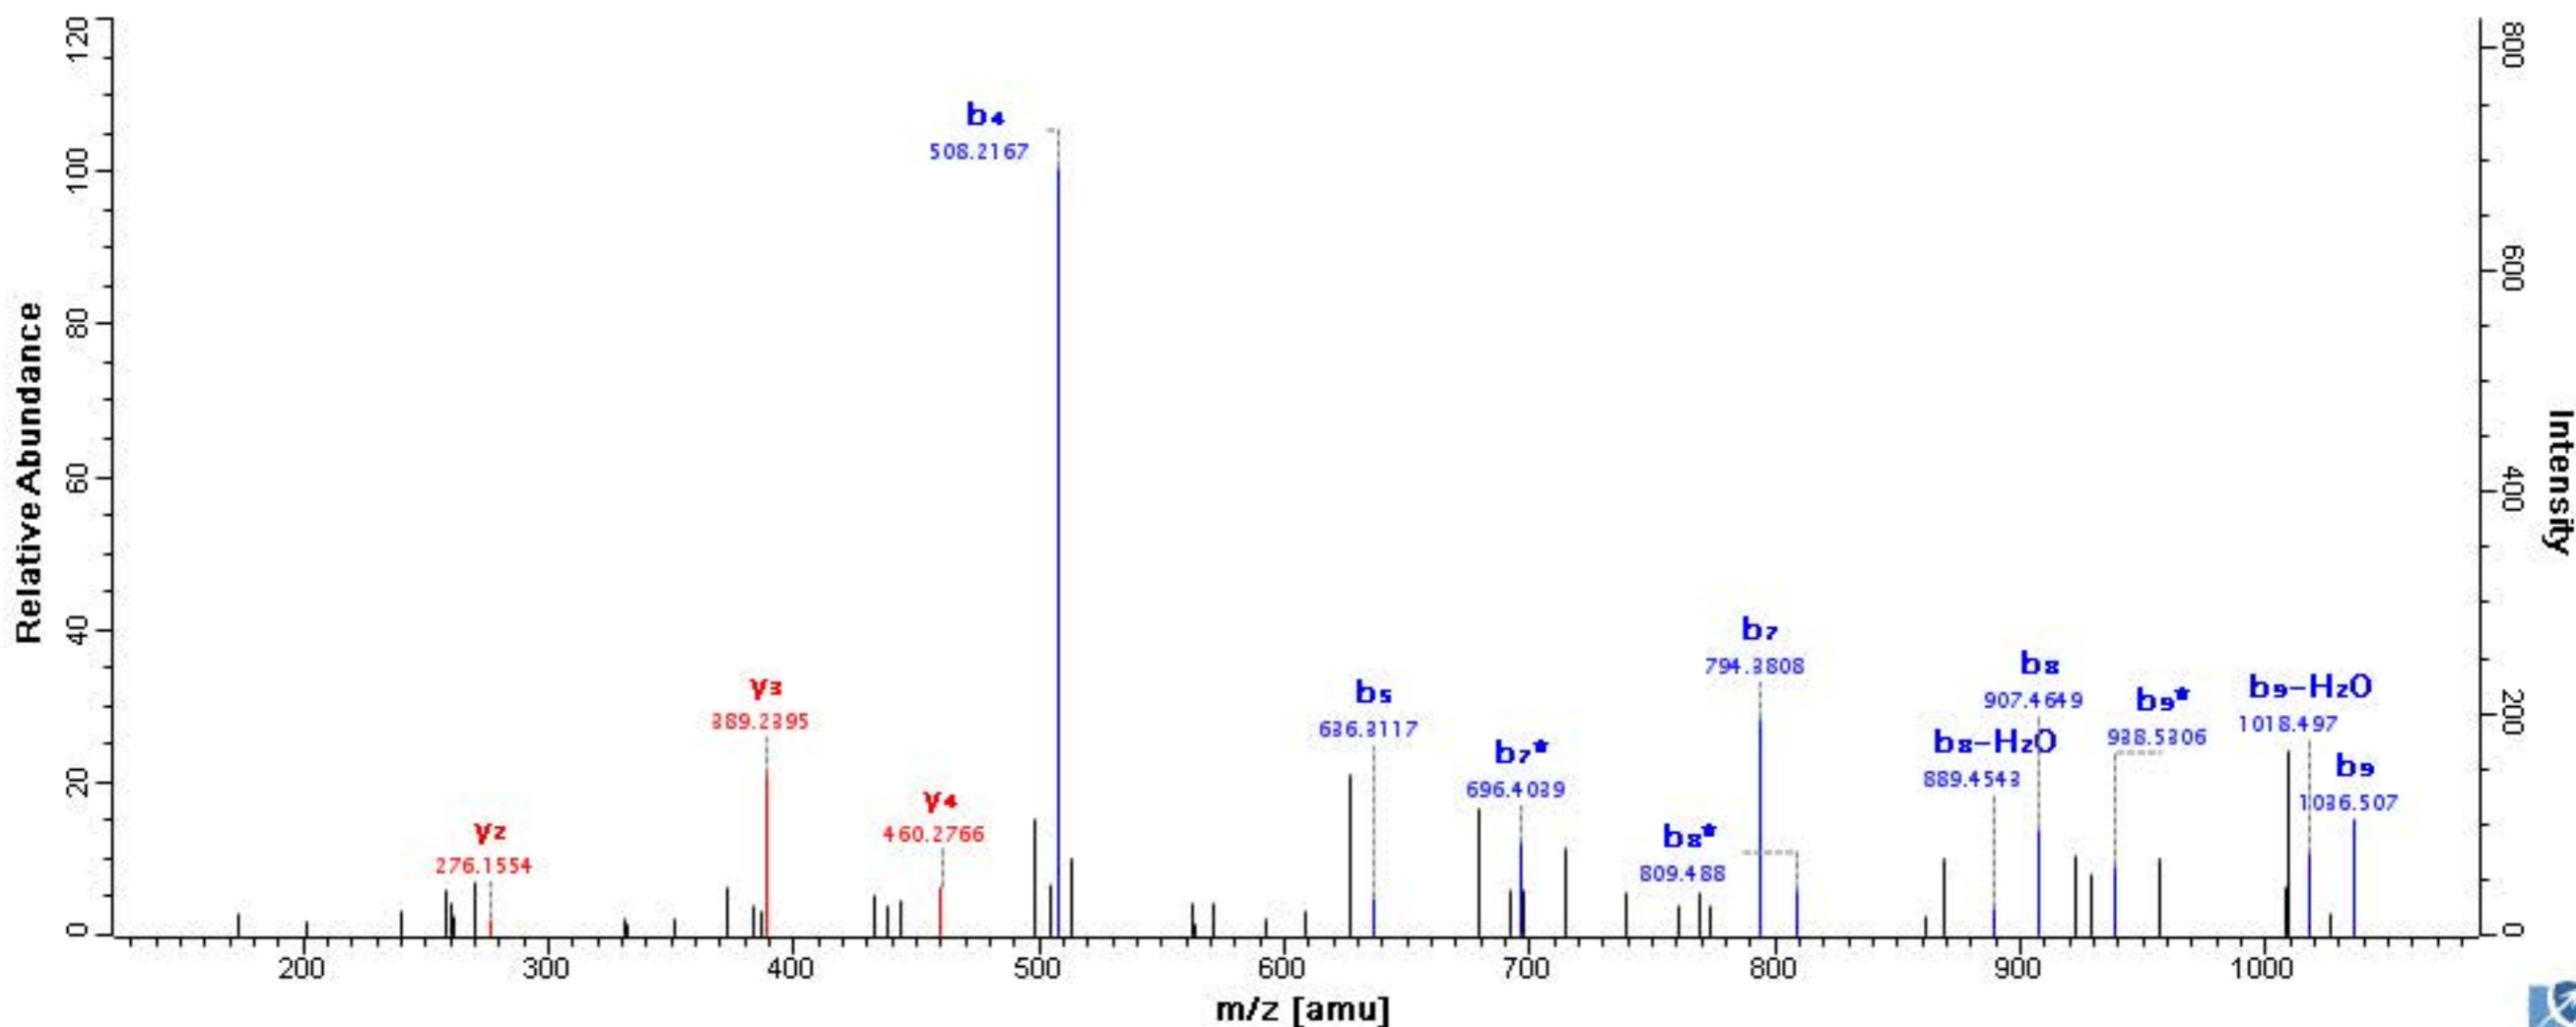

**precursor information**

|                   |                     |
|-------------------|---------------------|
| Mass:             | 1181.60603          |
| m/z:              | System.Collections. |
| Charge:           | System.Collections. |
| Retentiontime:    | System.Collections. |
| Score:            | 56.20483            |
| Mass Error [ppm]: | 0.27174             |
| PEP:              | 0.11663             |
| Precursor Type:   | MULTI               |

**general information**

|                       |          |
|-----------------------|----------|
| Annotation:           | 6 of 10  |
| AminoAcids Coverage:  | 60 %     |
| Intensity Coverage:   | 47 %     |
| Protein Localisation: | 2 ... 11 |

| b ion      |                |    |     |   | y ion          |            |  |  |  |
|------------|----------------|----|-----|---|----------------|------------|--|--|--|
| Δ dalton   | mass           |    | seq |   | Δ dalton       | mass       |  |  |  |
|            | 168.005635285  | 1  | S   | 9 |                |            |  |  |  |
|            | 282.048562732  | 2  | N   | 8 | 1015.614621871 |            |  |  |  |
|            | 395.132626712  | 3  | I   | 7 | 901.571694423  |            |  |  |  |
| -0.2542273 | 508.216690693  | 4  | I   | 6 | 788.487630443  |            |  |  |  |
| +0.1111979 | 636.311653711  | 5  | K   | 5 | 675.403566463  |            |  |  |  |
|            | 723.34368212   | 6  | S   | 4 | 547.308603445  |            |  |  |  |
| +0.0697656 | 794.380795908  | 7  | A   | 3 | 460.276575035  | -0.2804813 |  |  |  |
| +0.2877646 | 907.464859889  | 8  | I   | 2 | 389.239461247  | +0.0697429 |  |  |  |
| +0.0982599 | 1036.507452985 | 9  | E   | 1 | 276.155397267  | +0.2708112 |  |  |  |
|            |                | 10 | K   | 0 | 147.112804171  |            |  |  |  |

Source: 201 20530\_VR\_Bsu\_TripleSILAC\_pWTPPrkCPrpC\_F07  
 Scannumber: 6256  
 Protein: BSU01390; infA  
 Peptide Score: 60.92  
 Method: ITMS; CID; 3

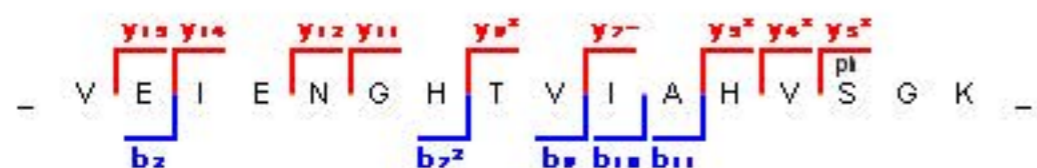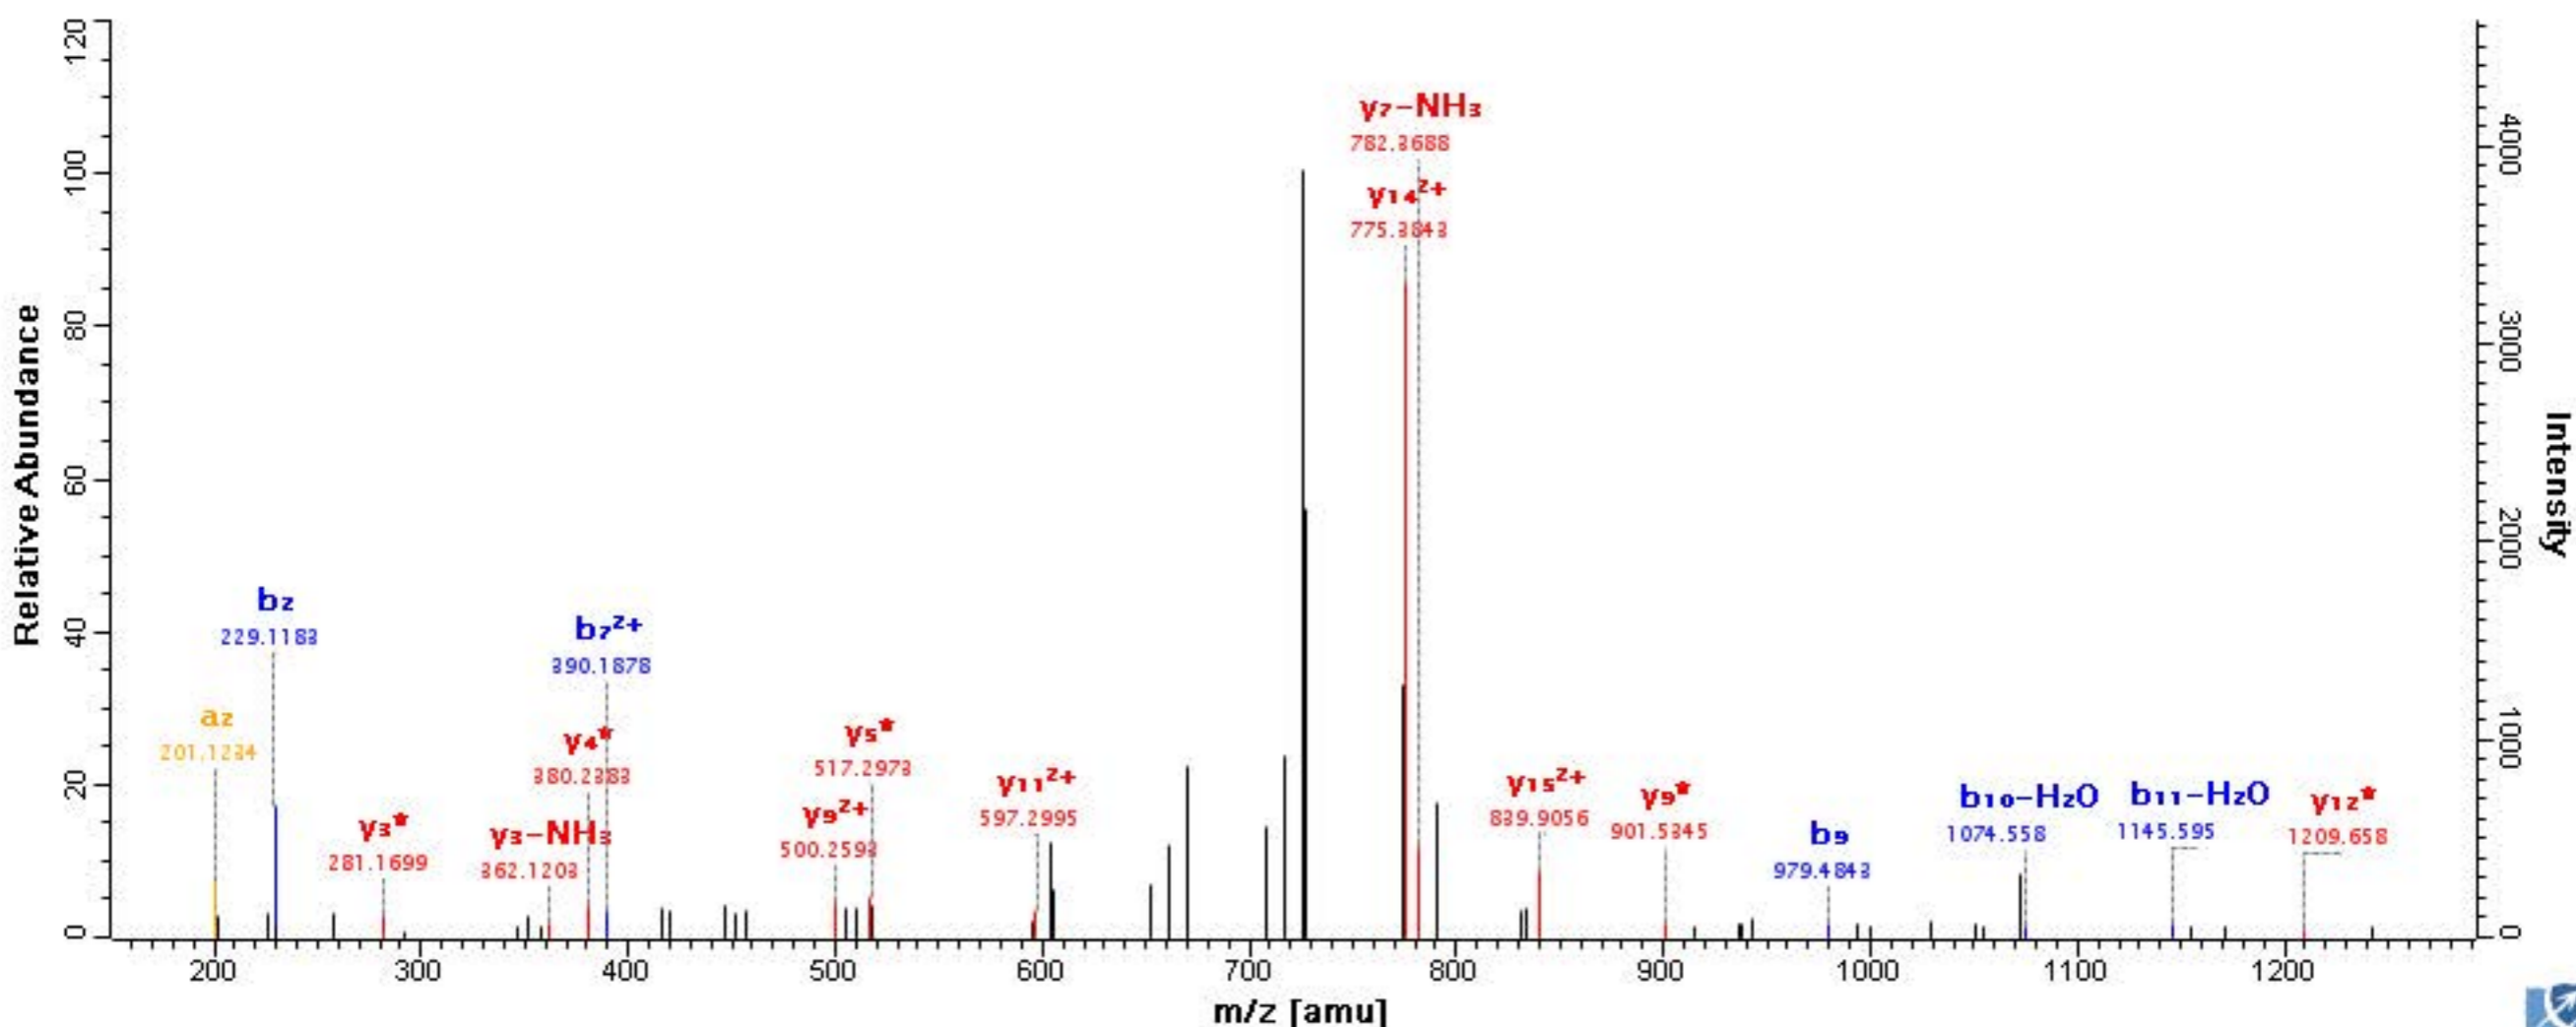

#### precursor information

|                   |                     |
|-------------------|---------------------|
| Mass:             | 1768.852            |
| m/z:              | System.Collections. |
| Charge:           | System.Collections. |
| Retentiontime:    | System.Collections. |
| Score:            | 60.91842            |
| Mass Error [ppm]: | 0.61402             |
| PEP:              | 0.010692            |
| Precursor Type:   | MULTI               |

#### general information

|                       |           |
|-----------------------|-----------|
| Annotation:           | 12 of 16  |
| AminoAcids Coverage:  | 75 %      |
| Intensity Coverage:   | 28 %      |
| Protein Localisation: | 24 ... 39 |

| a ion    |         | b <sup>2+</sup> ion |          | b ion    |          |    |     |    | y ion    |      | y <sup>2+</sup> ion |         |
|----------|---------|---------------------|----------|----------|----------|----|-----|----|----------|------|---------------------|---------|
| Δ dalton | mass    | Δ dalton            | mass     | Δ dalton | mass     |    | seq |    | Δ dalton | mass | Δ dalton            | mass    |
|          | 72.0808 |                     | 100.076  |          | 100.076  | 1  | V   | 15 |          |      |                     |         |
| -0.0334  | 201.123 |                     | 229.118  | +0.0704  | 229.118  | 2  | E   | 14 | 1678.8   |      | 839.906             | +0.2096 |
|          | 314.207 |                     | 342.202  |          | 342.202  | 3  | I   | 13 | 1549.76  |      | 775.384             | +0.2212 |
|          | 443.25  |                     | 471.245  |          | 471.245  | 4  | E   | 12 | 1436.68  |      | 1436.68             |         |
|          | 557.293 |                     | 585.288  |          | 585.288  | 5  | N   | 11 | 1307.63  |      | 1307.63             |         |
|          | 614.314 |                     | 642.309  |          | 642.309  | 6  | G   | 10 | 1193.59  |      | 597.3               | -0.4575 |
|          | 751.373 | +0.0549             | 2390.188 |          | 779.368  | 7  | H   | 9  | 1136.57  |      | 1136.57             |         |
|          | 852.421 |                     | 880.416  |          | 880.416  | 8  | T   | 8  | 999.511  |      | 500.259             | +0.2465 |
|          | 951.489 |                     | 979.484  | +0.1614  | 2979.484 | 9  | V   | 7  | 898.464  |      | 898.464             |         |
|          | 1064.57 |                     | 1092.57  |          | 1092.57  | 10 | I   | 6  | 799.395  |      | 799.395             |         |
|          | 1135.61 |                     | 1163.61  |          | 1163.61  | 11 | A   | 5  | 686.311  |      | 686.311             |         |
|          | 1272.67 |                     | 1300.66  |          | 1300.66  | 12 | H   | 4  | 615.274  |      | 615.274             |         |
|          | 1371.74 |                     | 1399.73  |          | 1399.73  | 13 | V   | 3  | 478.215  |      | 478.215             |         |
|          | 1538.74 |                     | 1566.73  |          | 1566.73  | 14 | S   | 2  | 379.147  |      | 379.147             |         |
|          | 1595.76 |                     | 1623.75  |          | 1623.75  | 15 | G   | 1  | 212.148  |      | 212.148             |         |
|          |         |                     |          |          |          | 16 | K   | 0  | 155.127  |      | 155.127             |         |

Source: 201 20530\_VR\_Bsu\_TripleSILAC\_pWTPPrkCPrpC\_F07  
 Scannumber: 6537  
 Protein: BSU15770; prkC; yloP  
 Peptide Score: 186.16  
 Method: ITMS; CID; 3

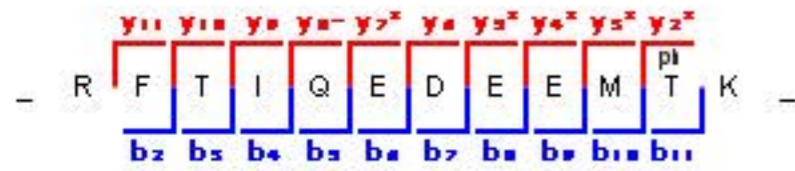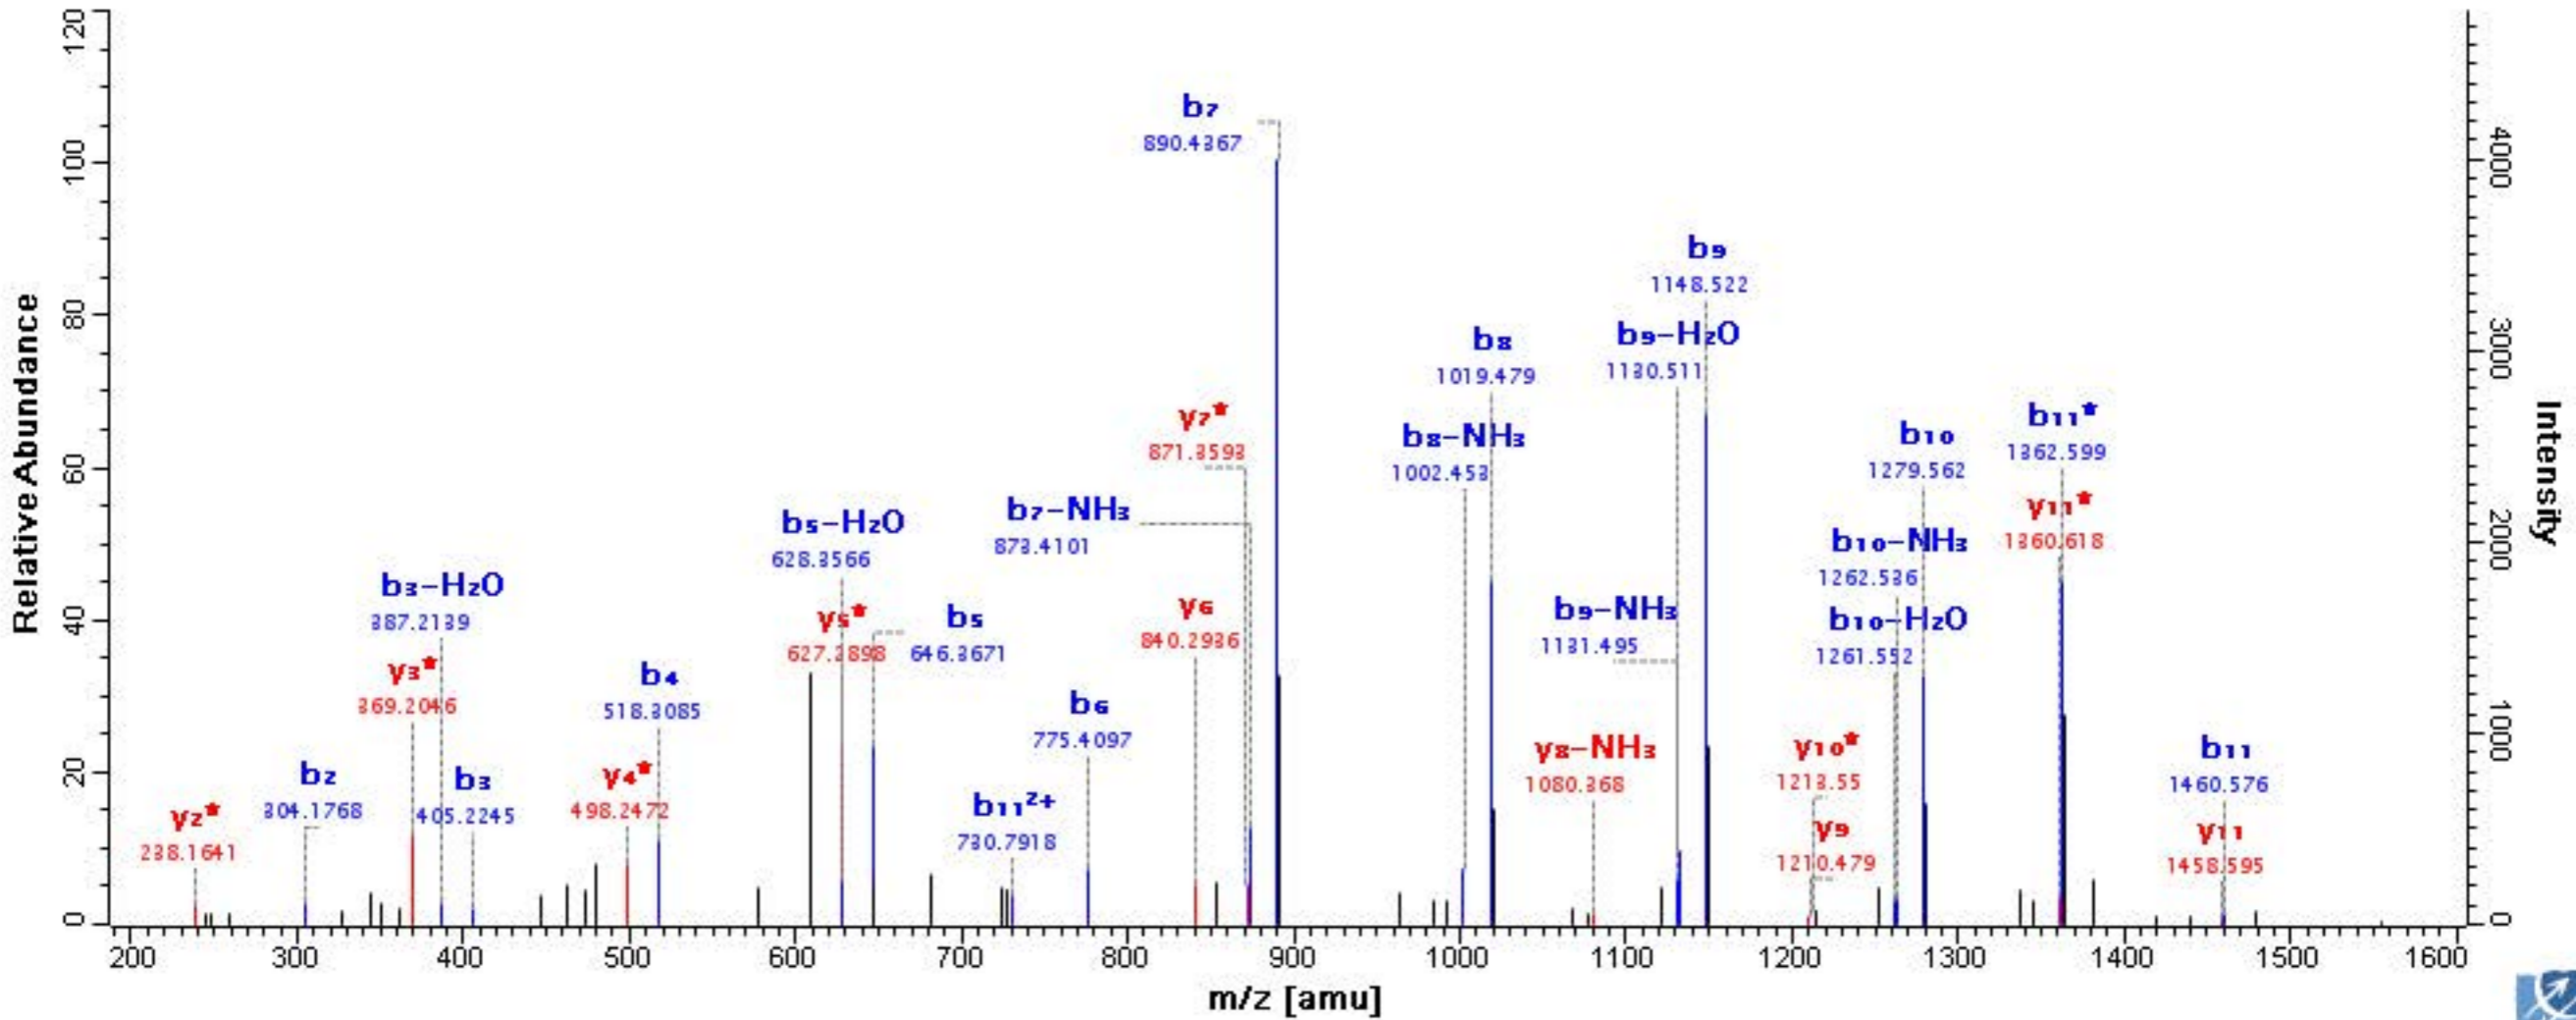

**precursor information**

|                   |                     |
|-------------------|---------------------|
| Mass:             | 1613.68922          |
| m/z:              | System.Collections. |
| Charge:           | System.Collections. |
| Retentiontime:    | System.Collections. |
| Score:            | 186.1593            |
| Mass Error [ppm]: | 0.27027             |
| PEP:              | 1.3064E-71          |
| Precursor Type:   | ISO                 |

**general information**

|                       |             |
|-----------------------|-------------|
| Annotation:           | 10 of 12    |
| AminoAcids Coverag    | 83 %        |
| Intensity Coverage:   | 64 %        |
| Protein Localisation: | 280 ... 291 |

| b <sup>2+</sup> ion |              | b ion      |              |     | y ion |          |                         |
|---------------------|--------------|------------|--------------|-----|-------|----------|-------------------------|
| Δ dalton            | mass         | Δ dalton   | mass         | seq |       | Δ dalton | mass                    |
|                     | 157.10838749 |            | 157.10838749 | 1   | R     | 11       |                         |
|                     | 304.17680141 | +0.0821402 | 304.17680141 | 2   | F     | 10       | 1458.5949527 +0.3021421 |
|                     | 405.22447988 | +0.0070875 | 405.22447988 | 3   | T     | 9        | 1311.5265388            |
|                     | 518.30854387 | +0.0503429 | 518.30854387 | 4   | I     | 8        | 1210.4788603 -0.1595243 |
|                     | 646.36712138 | +0.1165212 | 646.36712138 | 5   | Q     | 7        | 1097.3947963            |
|                     | 775.40971447 | +0.0466454 | 775.40971447 | 6   | E     | 6        | 969.33621879            |
|                     | 890.43665751 | -0.0269285 | 890.43665751 | 7   | D     | 5        | 840.2936257 +0.1278221  |
|                     | 1019.4792506 | +0.0335057 | 1019.4792506 | 8   | E     | 4        | 725.26668266            |
|                     | 1148.5218437 | +0.1263497 | 1148.5218437 | 9   | E     | 3        | 596.22408957            |
|                     | 1279.5623283 | +0.0775643 | 1279.5623283 | 10  | M     | 2        | 467.18149647            |
| -0.4428688          | 730.79180683 | -0.4105657 | 1460.5763372 | 11  | T     | 1        | 336.14101187            |
|                     |              |            |              | 12  | K     | 0        | 155.12700298            |



Source: 20120530\_VR\_Bsu\_TripleSILAC\_pWTPPrkCPrpC\_F07  
 Scannumber: 7532  
 Protein: BSU28290; ilvC  
 Peptide Score: 93.91  
 Method: ITMS; CID; 3

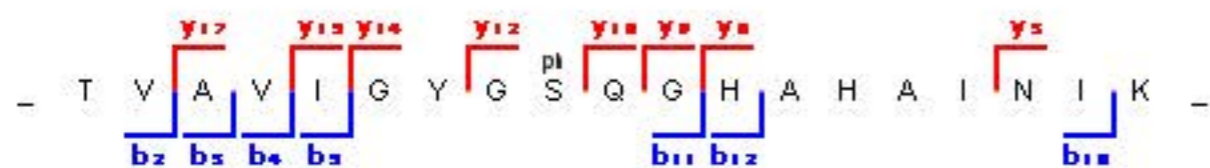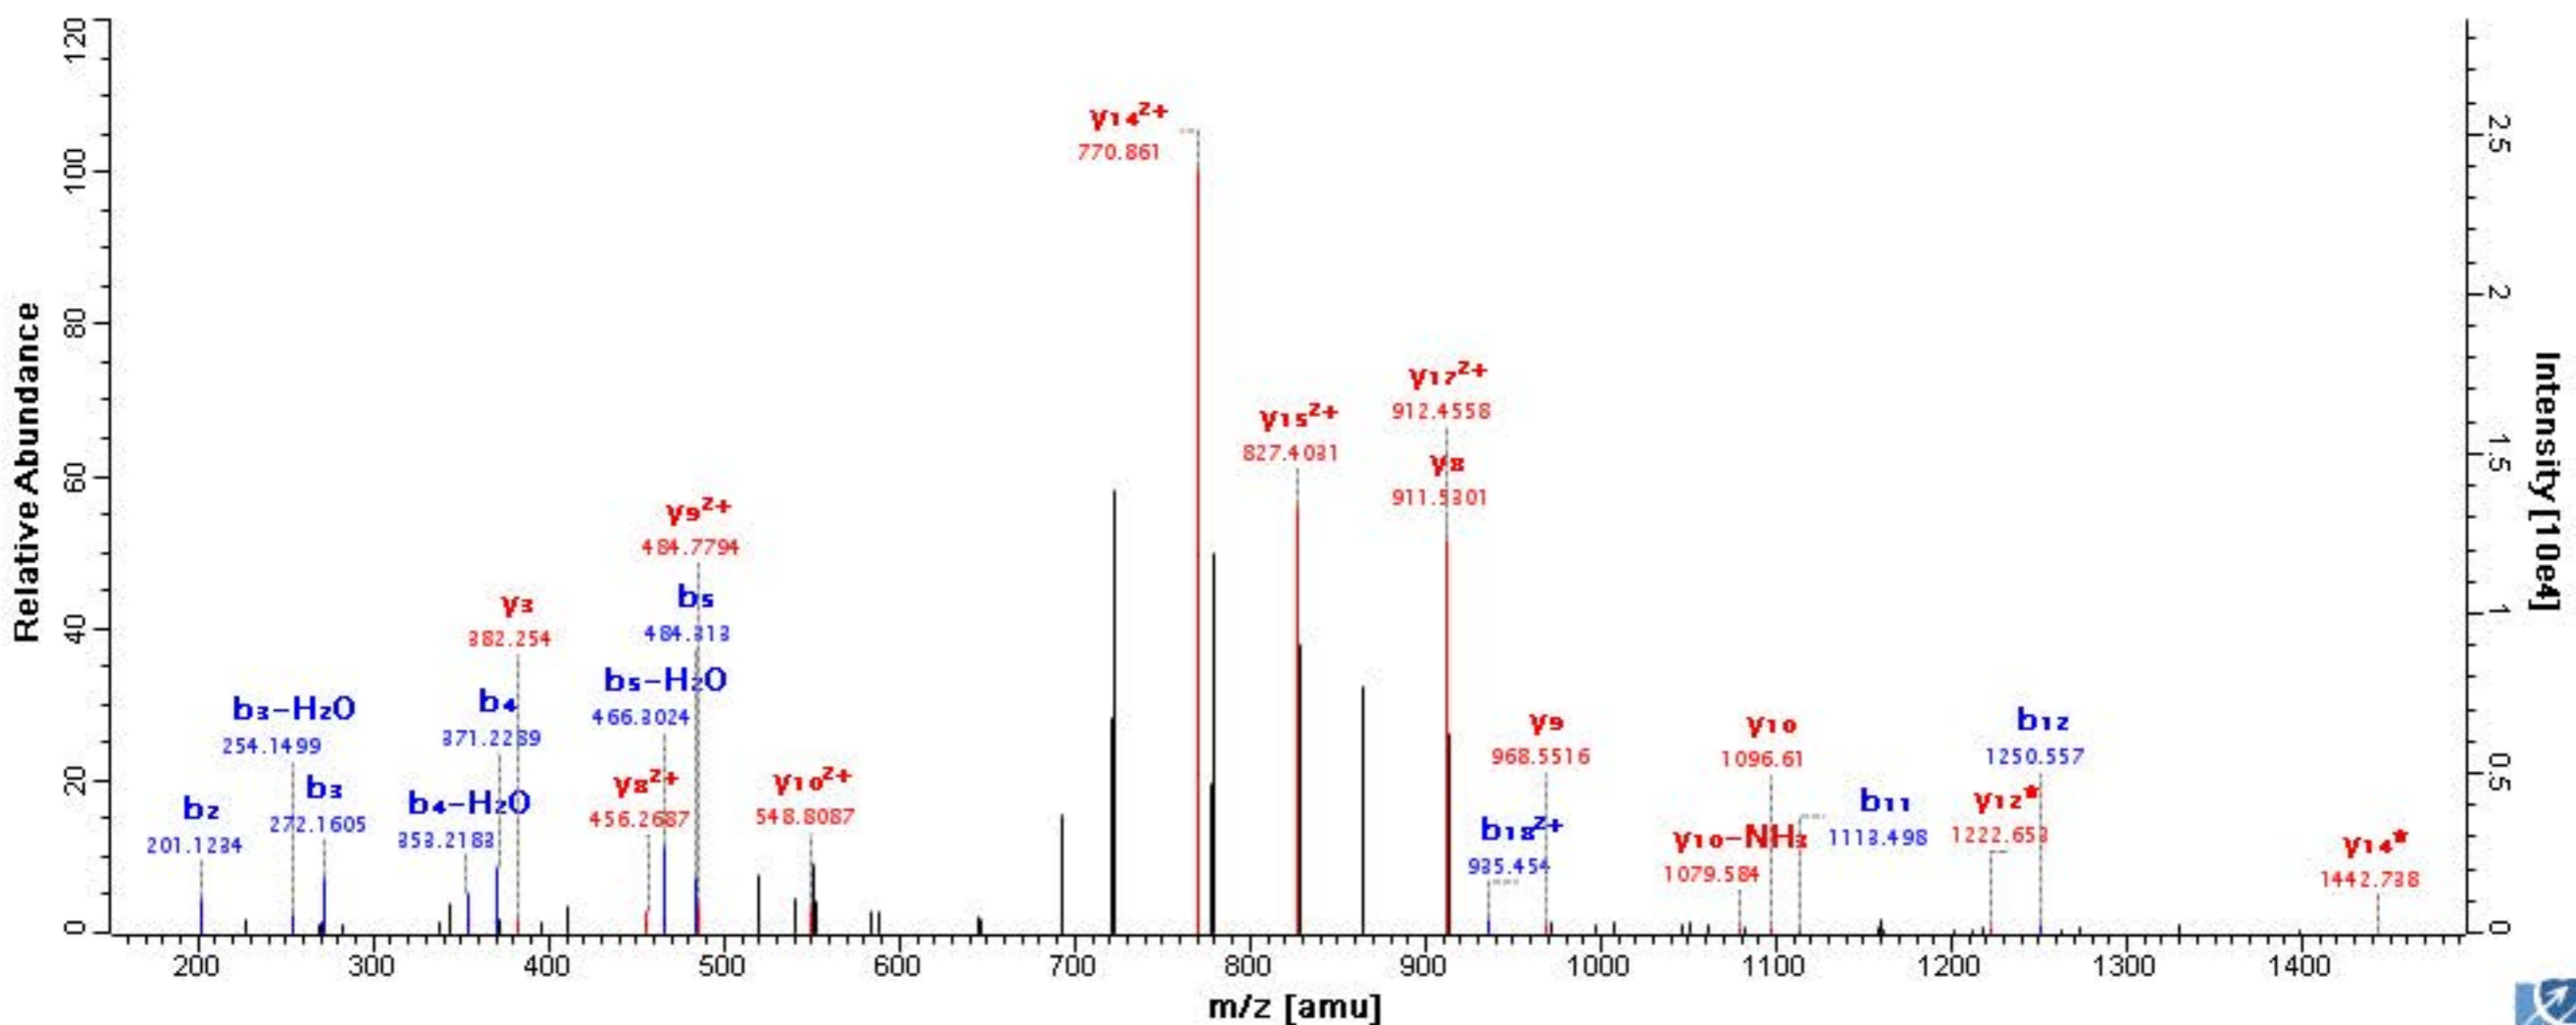

precursor information

|                   |                     |
|-------------------|---------------------|
| Mass:             | 2014.99861          |
| m/z:              | System.Collections. |
| Charge:           | System.Collections. |
| Retentiontime:    | System.Collections. |
| Score:            | 93.90913            |
| Mass Error [ppm]: | -0.17926            |
| PEP:              | 2.8119E-07          |
| Precursor Type:   | MULTI               |

| b <sup>2+</sup> ion |          | b ion     |          | seq |   | y ion    |                    | y <sup>2+</sup> ion |                    |
|---------------------|----------|-----------|----------|-----|---|----------|--------------------|---------------------|--------------------|
| Δ dalton            | mass     | Δ dalton  | mass     |     |   | Δ dalton | mass               | Δ dalton            | mass               |
|                     | 102.055  |           | 102.055  | 1   | T | 18       |                    |                     |                    |
|                     | 201.1234 | -0.000719 | 201.1234 | 2   | V | 17       | 1922.973           |                     | 1922.973           |
|                     | 272.1605 | +0.044992 | 272.1605 | 3   | A | 16       | 1823.904           |                     | 912.4558 +0.000726 |
|                     | 371.2289 | -0.120925 | 371.2289 | 4   | V | 15       | 1752.867           |                     | 1752.867           |
|                     | 484.313  | -0.152072 | 484.313  | 5   | I | 14       | 1653.799           |                     | 827.4031 +0.018761 |
|                     | 541.3344 |           | 541.3344 | 6   | G | 13       | 1540.715           |                     | 770.861 +0.190065  |
|                     | 704.3978 |           | 704.3978 | 7   | Y | 12       | 1483.693           |                     | 1483.693           |
|                     | 761.4192 |           | 761.4192 | 8   | G | 11       | 1320.63            |                     | 1320.63            |
|                     | 928.4176 |           | 928.4176 | 9   | S | 10       | 1263.609           |                     | 1263.609           |
|                     | 1056.476 |           | 1056.476 | 10  | Q | 9        | 1096.61 +0.011797  | 548.8087            | +0.077334          |
|                     | 1113.498 | +0.211734 | 1113.498 | 11  | G | 8        | 968.5516 +0.086915 | 484.7794            | +0.381403          |
|                     | 1250.557 | +0.196035 | 1250.557 | 12  | H | 7        | 911.5301 -0.155049 | 456.2687            | -0.220475          |
|                     | 1321.594 |           | 1321.594 | 13  | A | 6        | 774.4712           |                     | 774.4712           |
|                     | 1458.653 |           | 1458.653 | 14  | H | 5        | 703.4341           |                     | 703.4341           |
|                     | 1529.69  |           | 1529.69  | 15  | A | 4        | 566.3752           |                     | 566.3752           |
|                     | 1642.774 |           | 1642.774 | 16  | I | 3        | 495.3381           |                     | 495.3381           |
|                     | 1756.817 |           | 1756.817 | 17  | N | 2        | 382.254 +0.208713  | 382.254             |                    |
| +0.338786           | 935.454  |           | 1869.901 | 18  | I | 1        | 268.2111           |                     | 268.2111           |
|                     |          |           |          | 19  | K | 0        | 155.127            |                     | 155.127            |

general information

|                       |           |
|-----------------------|-----------|
| Annotation:           | 12 of 19  |
| AminoAcids Coverag    | 63 %      |
| Intensity Coverage:   | 43 %      |
| Protein Localisation: | 19 ... 37 |

Source: 201 20530\_VR\_Bsu\_TripleSILAC\_pWTPPrkCPrpC\_F07  
 Scannumber: 9544  
 Protein: BSU37120; fba; fba1; fbaA; tsr  
 Peptide Score: 119.38  
 Method: ITMS; CID; 3

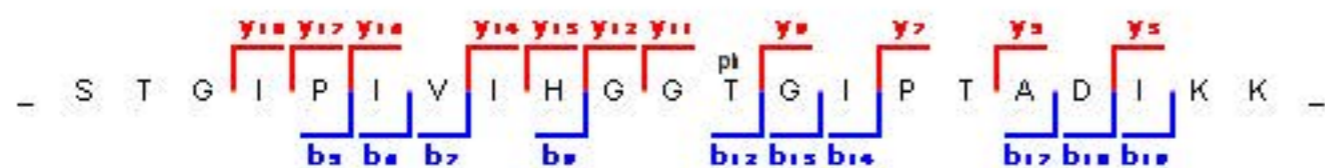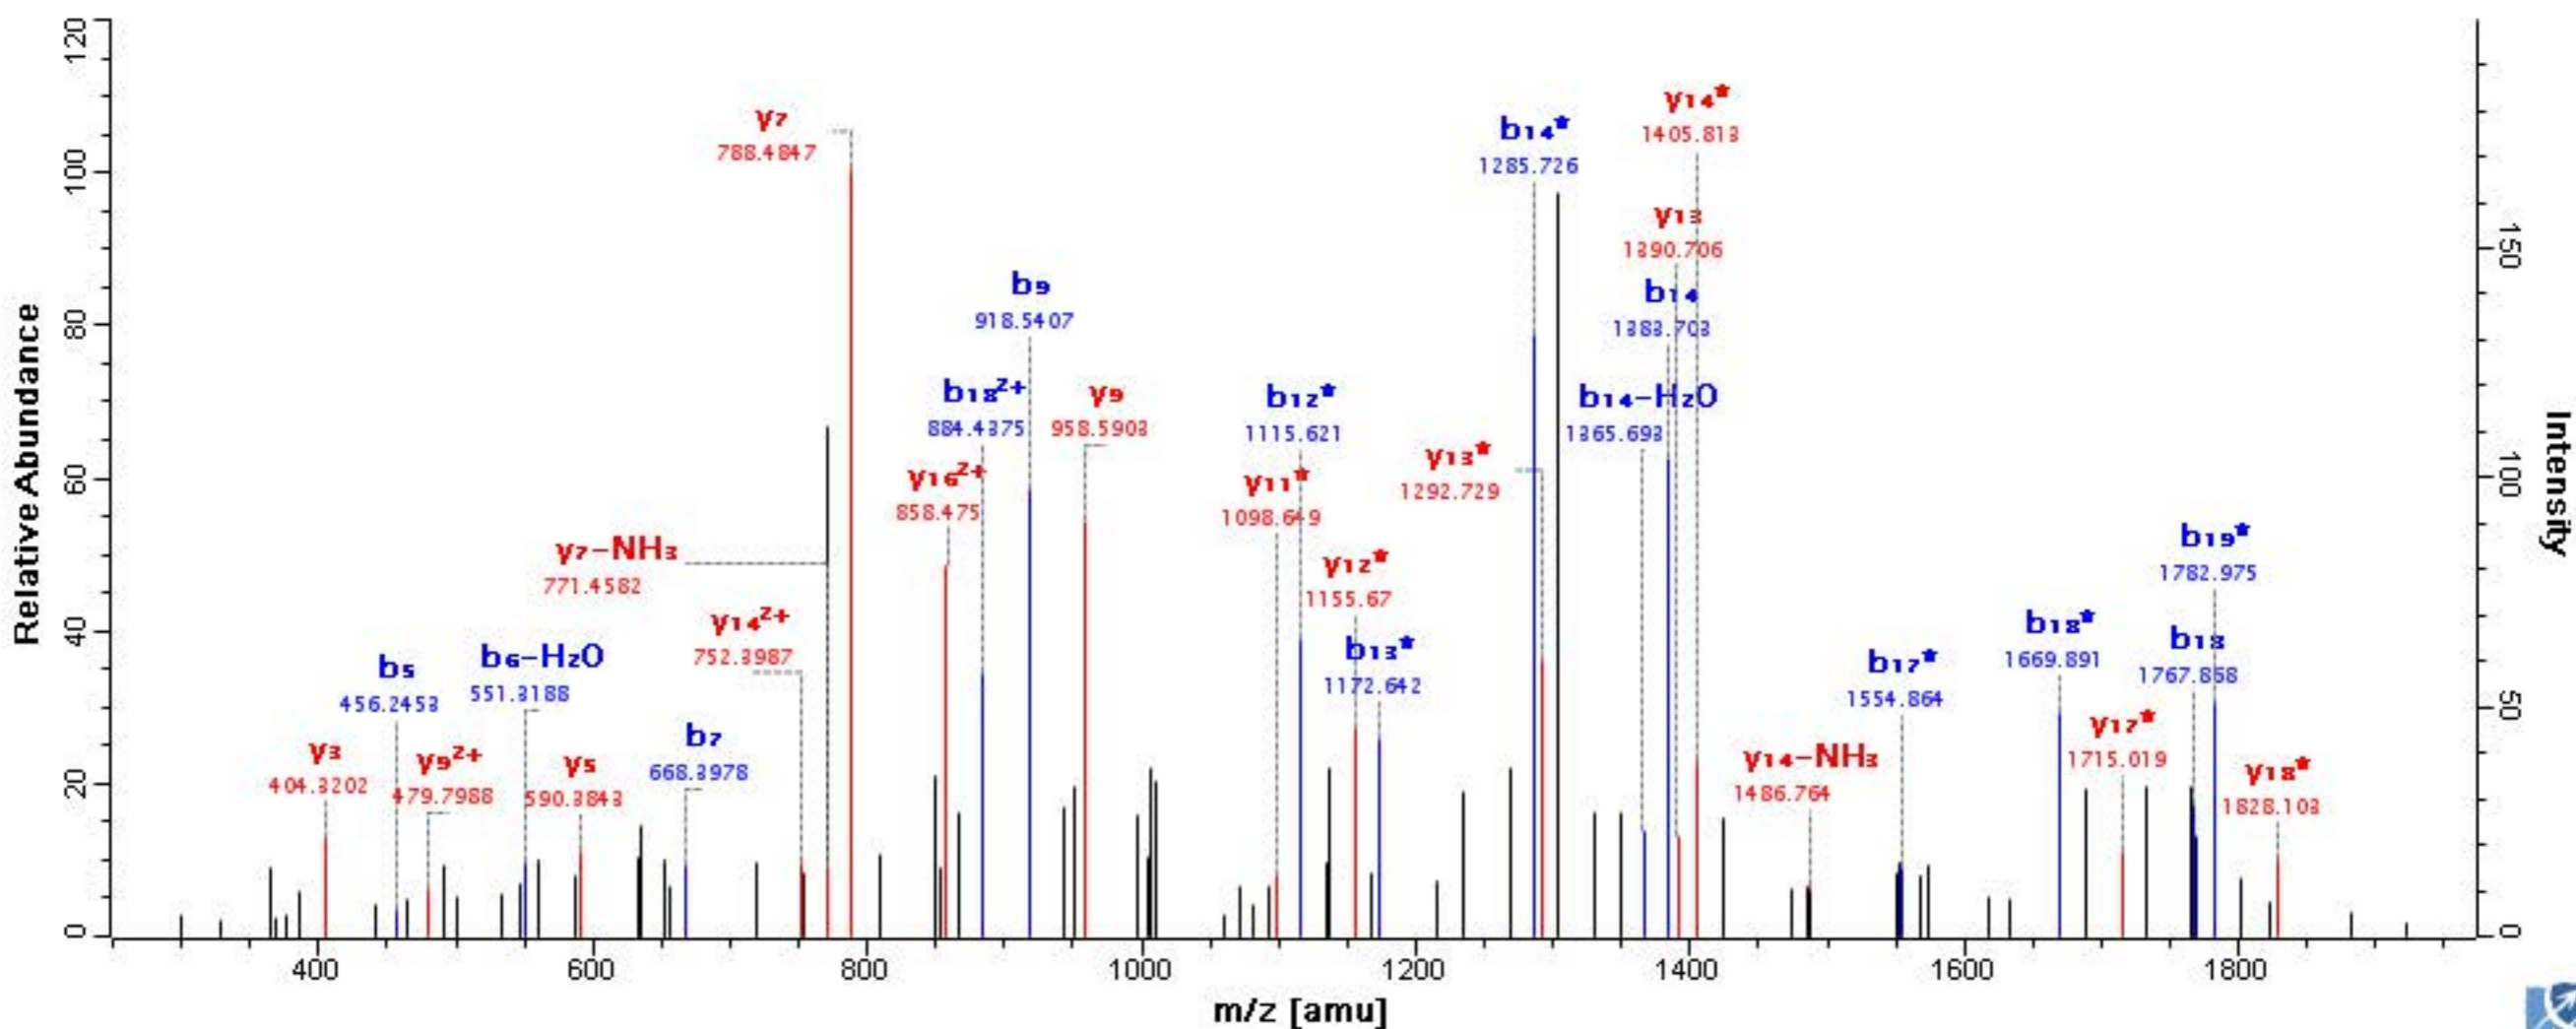

#### precursor information

|                   |                     |
|-------------------|---------------------|
| Mass:             | 2154.14536          |
| m/z:              | System.Collections. |
| Charge:           | System.Collections. |
| Retentiontime:    | System.Collections. |
| Score:            | 119.3771            |
| Mass Error [ppm]: | 0.17765             |
| PEP:              | 5.9379E-17          |
| Precursor Type:   | MULTI               |

| b <sup>2+</sup> ion |          | b ion     |          |    |     |    | y ion    |           | y <sup>2+</sup> ion |           |
|---------------------|----------|-----------|----------|----|-----|----|----------|-----------|---------------------|-----------|
| Δ dalton            | mass     | Δ dalton  | mass     |    | seq |    | Δ dalton | mass      | Δ dalton            | mass      |
|                     | 88.0393  |           | 88.0393  | 1  | S   | 20 |          |           |                     |           |
|                     | 189.087  |           | 189.087  | 2  | T   | 19 | 2084.149 |           | 2084.149            |           |
|                     | 246.1084 |           | 246.1084 | 3  | G   | 18 | 1983.101 |           | 1983.101            |           |
|                     | 359.1925 |           | 359.1925 | 4  | I   | 17 | 1926.079 |           | 1926.079            |           |
|                     | 456.2453 | -0.06162  | 456.2453 | 5  | P   | 16 | 1812.995 |           | 1812.995            |           |
|                     | 569.3293 |           | 569.3293 | 6  | I   | 15 | 1715.943 |           | 858.475             | -0.484971 |
|                     | 668.3978 | -0.071642 | 668.3978 | 7  | V   | 14 | 1602.859 |           | 1602.859            |           |
|                     | 781.4818 |           | 781.4818 | 8  | I   | 13 | 1503.79  |           | 752.3987            | +0.022665 |
|                     | 918.5407 | +0.166791 | 918.5407 | 9  | H   | 12 | 1390.706 | +0.090283 | 1390.706            |           |
|                     | 975.5622 |           | 975.5622 | 10 | G   | 11 | 1253.647 |           | 1253.647            |           |
|                     | 1032.584 |           | 1032.584 | 11 | G   | 10 | 1196.626 |           | 1196.626            |           |
|                     | 1213.598 |           | 1213.598 | 12 | T   | 9  | 1139.604 |           | 1139.604            |           |
|                     | 1270.619 |           | 1270.619 | 13 | G   | 8  | 958.5903 | -0.00737  | 479.7988            | +0.17682  |
|                     | 1383.703 | +0.022515 | 1383.703 | 14 | I   | 7  | 901.5688 |           | 901.5688            |           |
|                     | 1480.756 |           | 1480.756 | 15 | P   | 6  | 788.4847 | +0.097547 | 788.4847            |           |
|                     | 1581.804 |           | 1581.804 | 16 | T   | 5  | 691.432  |           | 691.432             |           |
|                     | 1652.841 |           | 1652.841 | 17 | A   | 4  | 590.3843 | +0.101676 | 590.3843            |           |
| -0.297469           | 884.4375 | +0.094588 | 1767.868 | 18 | D   | 3  | 519.3472 |           | 519.3472            |           |
|                     | 1880.952 |           | 1880.952 | 19 | I   | 2  | 404.3202 | +0.038597 | 404.3202            |           |
|                     | 2017.061 |           | 2017.061 | 20 | K   | 1  | 291.2362 |           | 291.2362            |           |
|                     |          |           |          | 21 | K   | 0  | 155.127  |           | 155.127             |           |

#### general information

|                       |             |
|-----------------------|-------------|
| Annotation:           | 15 of 21    |
| AminoAcids Coverag    | 71 %        |
| Intensity Coverage:   | 51 %        |
| Protein Localisation: | 201 ... 221 |

Source: 20120530\_VR\_Bsu\_TripleSILAC\_pWTPrkCPrpC\_F09  
 Scannumber: 5003  
 Protein: BSU13130; proA  
 Peptide Score: 63.06  
 Method: ITMS; CID; 3

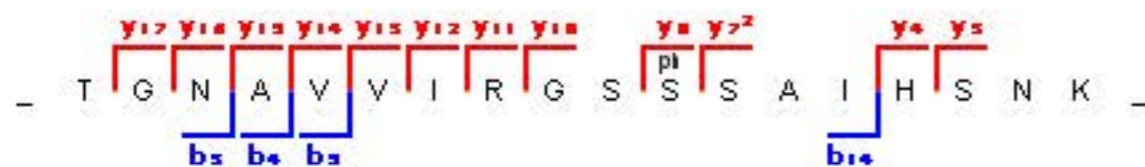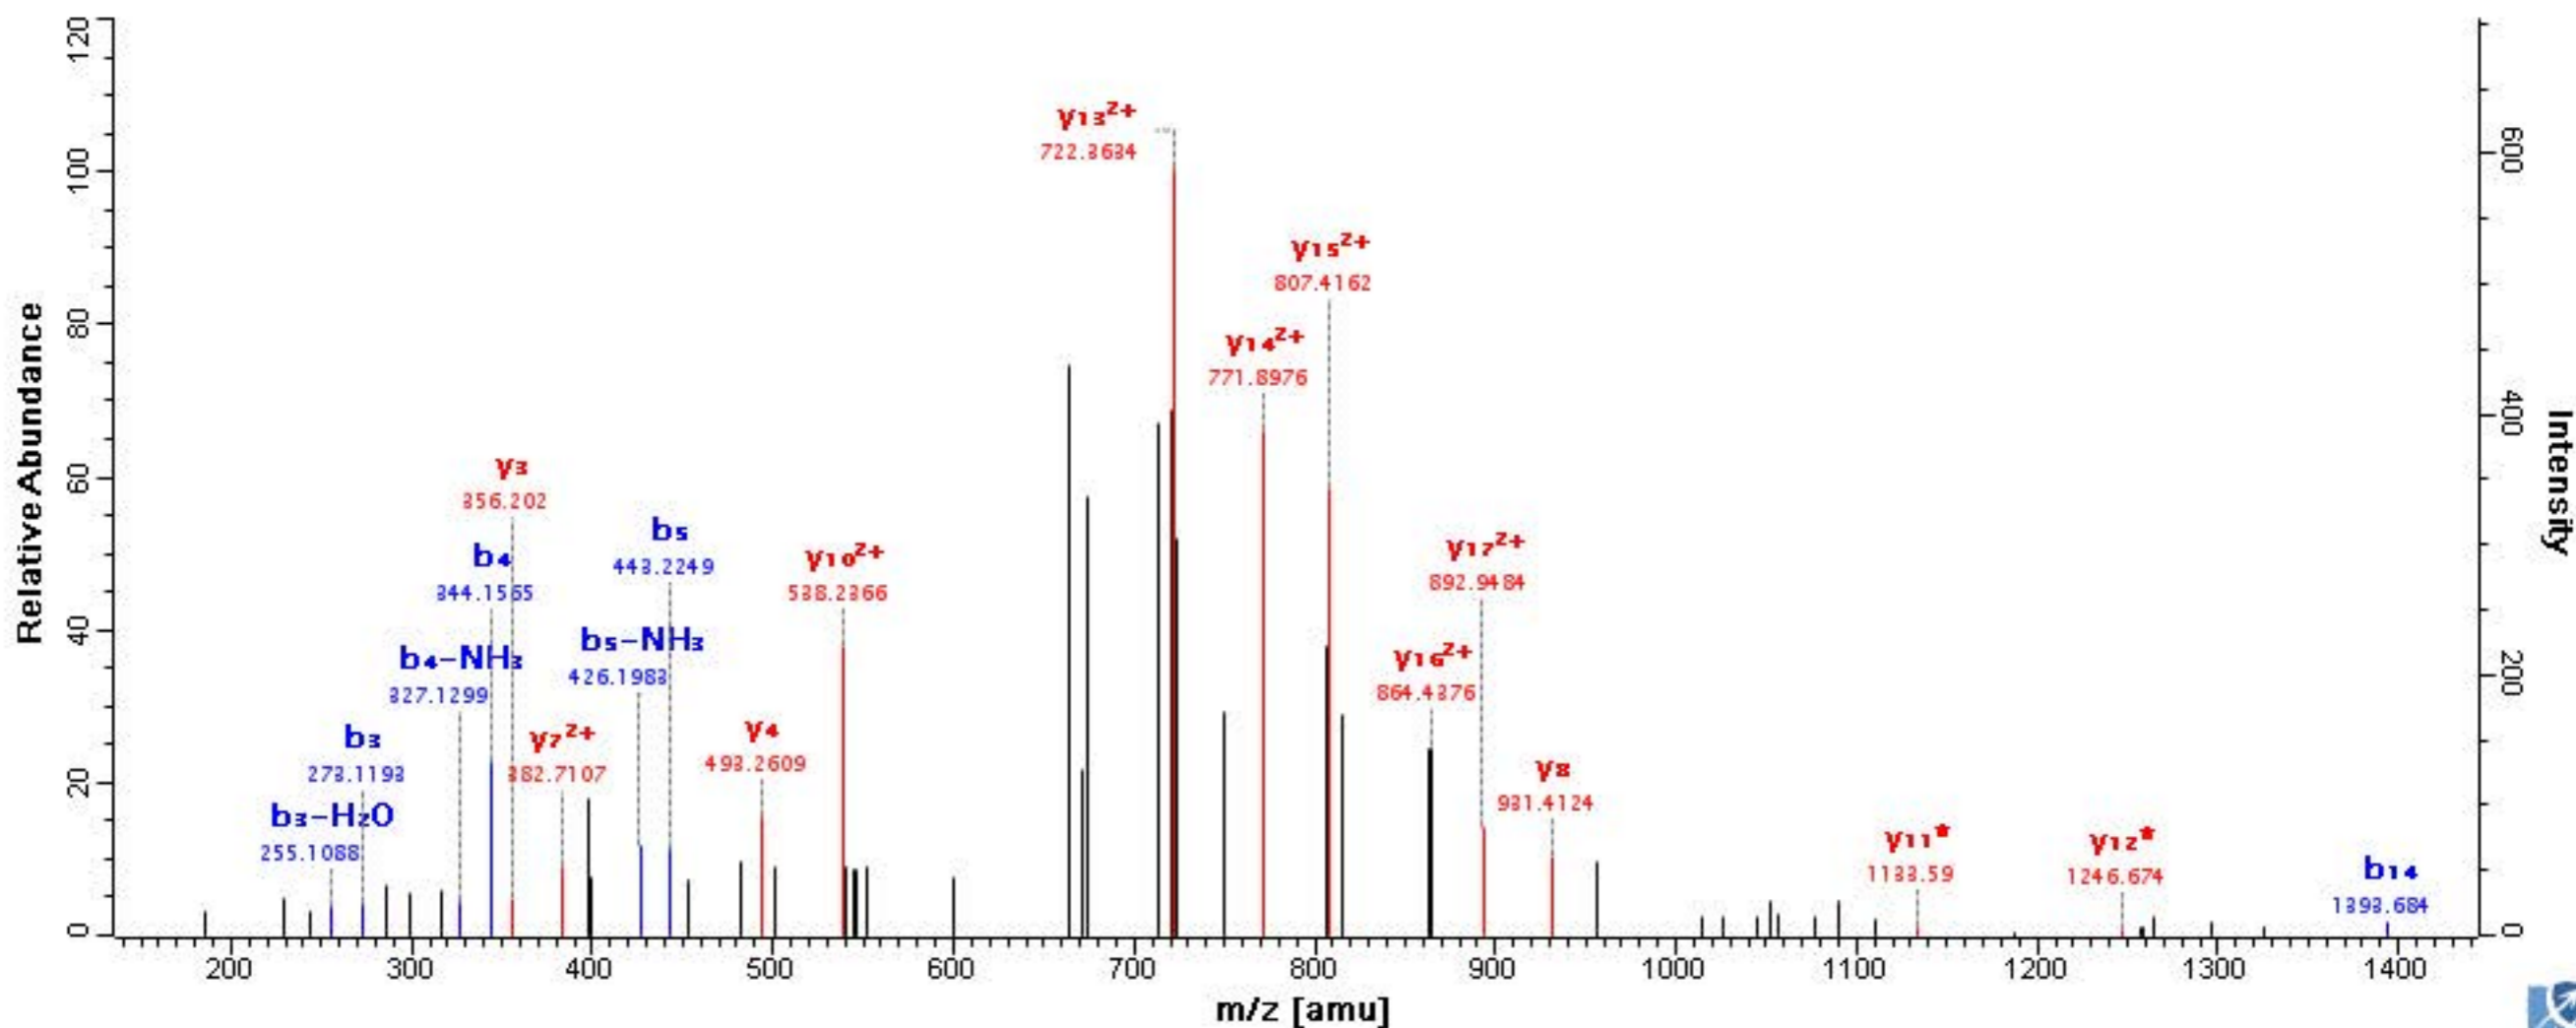

#### precursor information

|                   |                     |
|-------------------|---------------------|
| Mass:             | 1876.91581          |
| m/z:              | System.Collections. |
| Charge:           | System.Collections. |
| Retentiontime:    | System.Collections. |
| Score:            | 63.06153            |
| Mass Error [ppm]: | 0.089223            |
| PEP:              | 0.0062925           |
| Precursor Type:   | MULTI               |

#### general information

|                       |             |
|-----------------------|-------------|
| Annotation:           | 13 of 18    |
| AminoAcids Coverag    | 72 %        |
| Intensity Coverage:   | 37 %        |
| Protein Localisation: | 138 ... 155 |

| b ion      |              |    |     |    | y ion        |            | y <sup>2+</sup> ion |            |
|------------|--------------|----|-----|----|--------------|------------|---------------------|------------|
| Δ dalton   | mass         |    | seq |    | Δ dalton     | mass       | Δ dalton            | mass       |
|            | 102.05495494 | 1  | T   | 17 |              |            |                     |            |
|            | 159.07641866 | 2  | G   | 16 | 1784.8894356 |            | 892.94835605        | +0.2676474 |
| -0.0804057 | 273.11934611 | 3  | N   | 15 | 1727.8679719 |            | 864.43762419        | -0.0482199 |
| +0.2035255 | 344.1564599  | 4  | A   | 14 | 1613.8250445 |            | 807.41616046        | +0.3923723 |
| +0.1476848 | 443.22487382 | 5  | V   | 13 | 1542.7879307 |            | 771.89760357        | +0.0074868 |
|            | 542.29328773 | 6  | V   | 12 | 1443.7195168 |            | 722.36339661        | -0.0476617 |
|            | 655.37735171 | 7  | I   | 11 | 1344.6511028 |            | 1344.6511028        |            |
|            | 811.47846274 | 8  | R   | 10 | 1231.5670389 |            | 1231.5670389        |            |
|            | 868.49992646 | 9  | G   | 9  | 1075.4659278 |            | 538.23660215        | +0.0473944 |
|            | 955.53195487 | 10 | S   | 8  | 1018.4444641 |            | 1018.4444641        |            |
|            | 1122.5303137 | 11 | S   | 7  | 931.4124357  | +0.0355623 | 931.4124357         |            |
|            | 1209.5623421 | 12 | S   | 6  | 764.41407688 |            | 382.71067667        | +0.1063399 |
|            | 1280.5994559 | 13 | A   | 5  | 677.38204847 |            | 677.38204847        |            |
| -0.3060785 | 1393.6835199 | 14 | I   | 4  | 606.34493468 |            | 606.34493468        |            |
|            | 1530.7424317 | 15 | H   | 3  | 493.2608707  | +0.0980771 | 493.2608707         |            |
|            | 1617.7744601 | 16 | S   | 2  | 356.20195884 | +0.0215519 | 356.20195884        |            |
|            | 1731.8173876 | 17 | N   | 1  | 269.16993043 |            | 269.16993043        |            |
|            |              | 18 | K   | 0  | 155.12700298 |            | 155.12700298        |            |

Source: 201 20530\_VR\_Bsu\_TripleSILAC\_pWTPPrkCPrpC\_F09  
 Scannumber: 5577  
 Protein: BSU15290;ftsZ  
 Peptide Score: 64.52  
 Method: ITMS; CID; 3

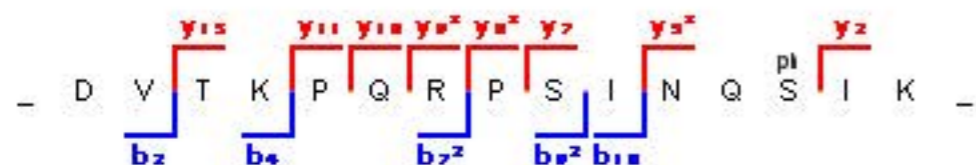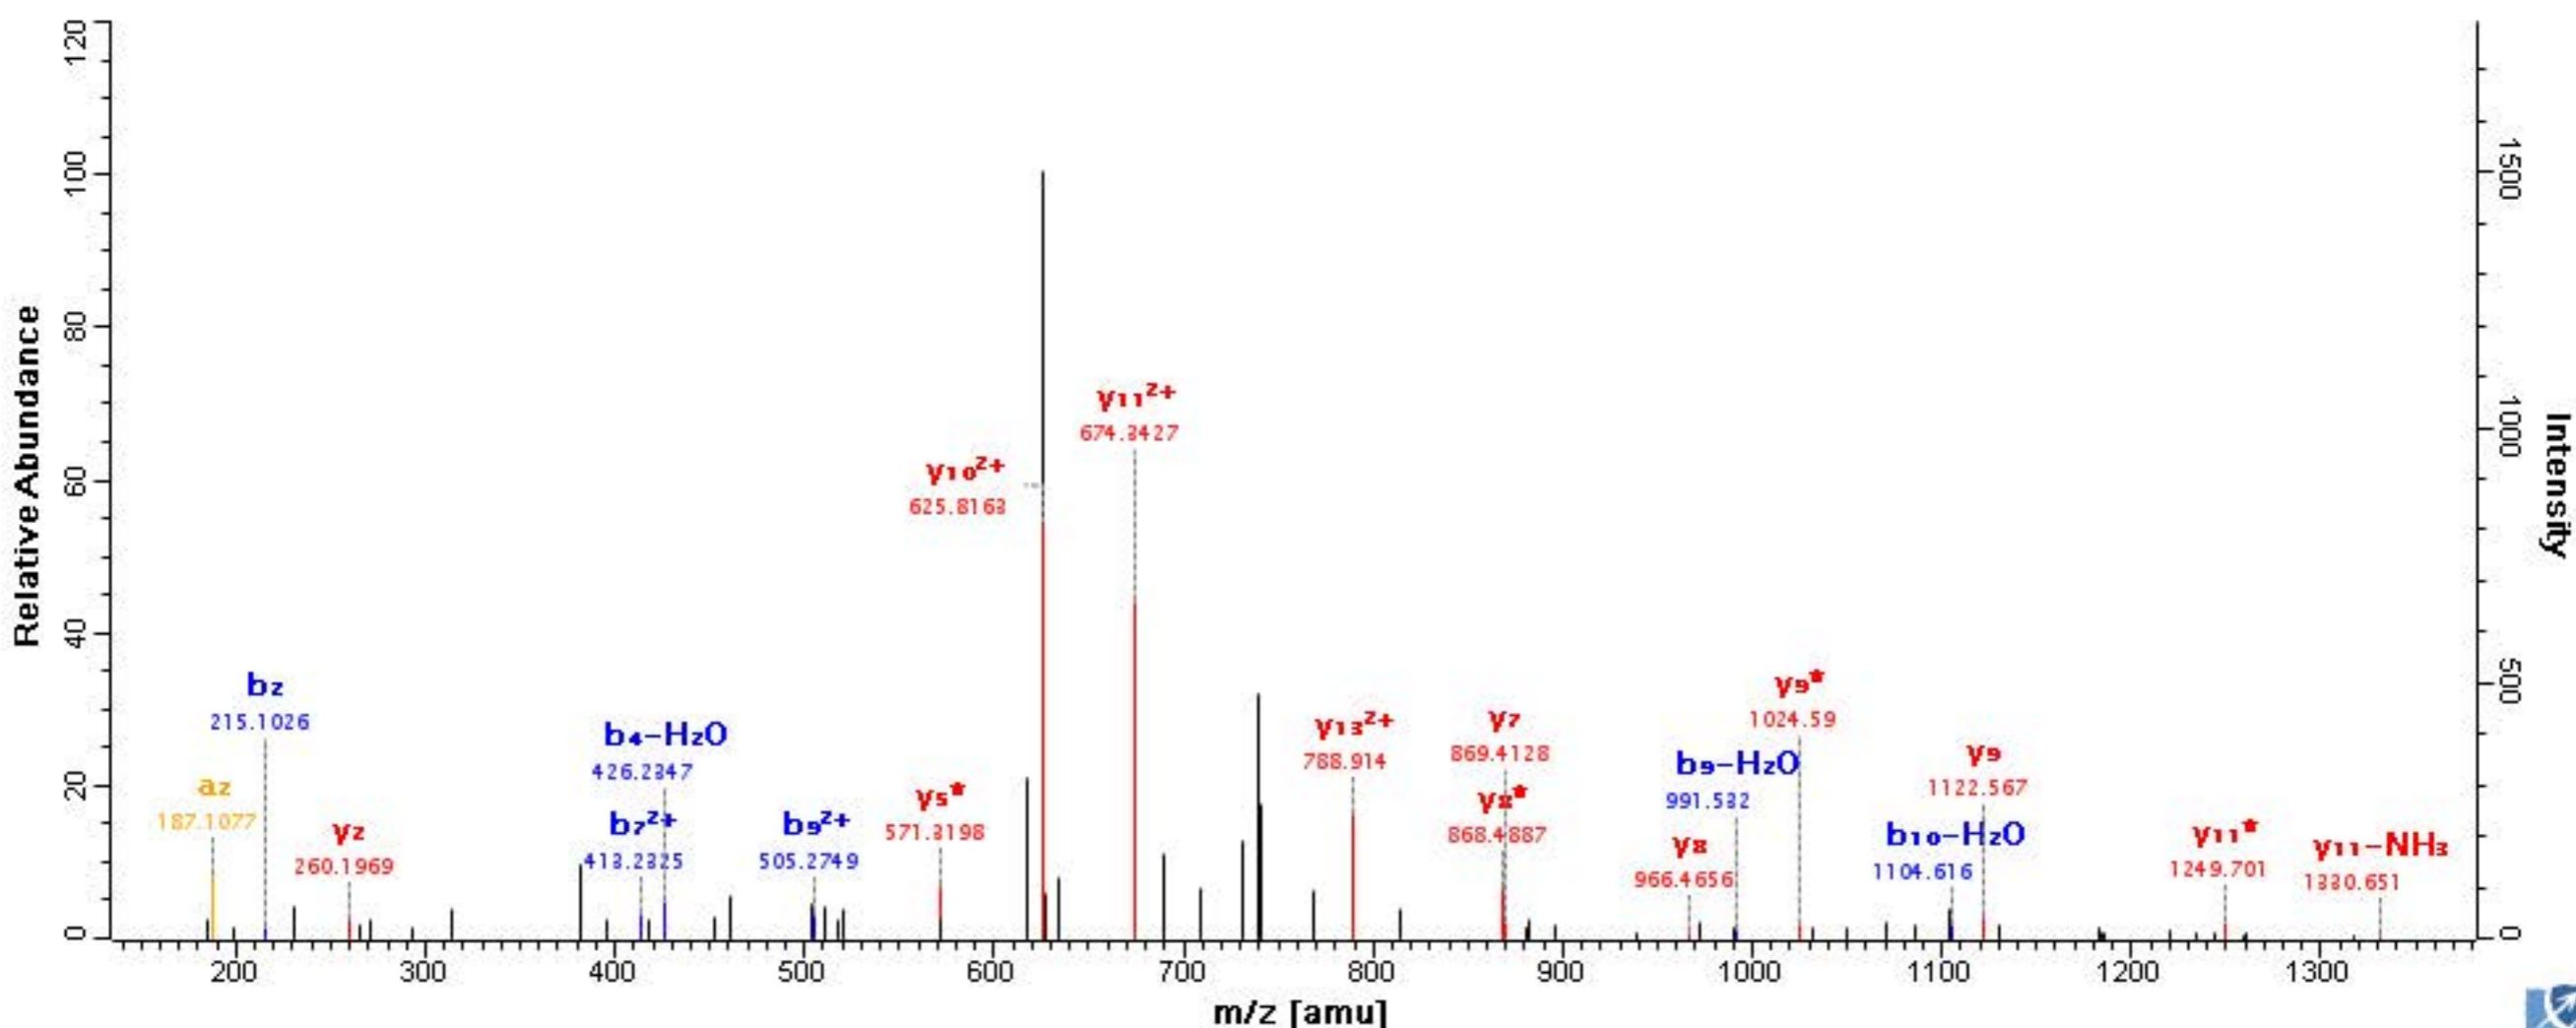

#### precursor information

|                   |                     |
|-------------------|---------------------|
| Mass:             | 1789.90891          |
| m/z:              | System.Collections. |
| Charge:           | System.Collections. |
| Retentiontime:    | System.Collections. |
| Score:            | 64.51992            |
| Mass Error [ppm]: | 0.084428            |
| PEP:              | 0.010028            |
| Precursor Type:   | MULTI               |

| a ion    |         | b <sup>2+</sup> ion |          | b ion    |         |    |     |    | y ion    |         | y <sup>2+</sup> ion |                 |
|----------|---------|---------------------|----------|----------|---------|----|-----|----|----------|---------|---------------------|-----------------|
| Δ dalton | mass    | Δ dalton            | mass     | Δ dalton | mass    |    | seq |    | Δ dalton | mass    | Δ dalton            | mass            |
|          | 88.0393 |                     | 116.034  |          | 116.034 | 1  | D   | 14 |          |         |                     |                 |
| +0.11559 | 187.108 |                     | 215.103  | +0.01419 | 215.103 | 2  | V   | 13 | 1675.89  |         |                     | 1675.89         |
|          | 288.155 |                     | 316.15   |          | 316.15  | 3  | T   | 12 | 1576.82  |         |                     | 788.914 +0.2397 |
|          | 416.25  |                     | 444.245  |          | 444.245 | 4  | K   | 11 | 1475.77  |         |                     | 1475.77         |
|          | 513.303 |                     | 541.298  |          | 541.298 | 5  | P   | 10 | 1347.68  |         |                     | 674.343 +0.1214 |
|          | 641.362 |                     | 669.357  |          | 669.357 | 6  | Q   | 9  | 1250.63  |         |                     | 625.816 +0.1244 |
|          | 797.463 | +0.1022             | 113.233  |          | 825.458 | 7  | R   | 8  | 1122.57  | -0.0701 |                     | 1122.57         |
|          | 894.516 |                     | 922.51   |          | 922.51  | 8  | P   | 7  | 966.466  | -0.0386 |                     | 966.466         |
|          | 981.548 | +0.0357             | 1505.275 |          | 1009.54 | 9  | S   | 6  | 869.413  | +0.2073 |                     | 869.413         |
|          | 1094.63 |                     | 1122.63  |          | 1122.63 | 10 | I   | 5  | 782.381  |         |                     | 782.381         |
|          | 1208.67 |                     | 1236.67  |          | 1236.67 | 11 | N   | 4  | 669.297  |         |                     | 669.297         |
|          | 1336.73 |                     | 1364.73  |          | 1364.73 | 12 | Q   | 3  | 555.254  |         |                     | 555.254         |
|          | 1503.73 |                     | 1531.73  |          | 1531.73 | 13 | S   | 2  | 427.195  |         |                     | 427.195         |
|          | 1616.82 |                     | 1644.81  |          | 1644.81 | 14 | I   | 1  | 260.197  | -0.0462 |                     | 260.197         |
|          |         |                     |          |          |         | 15 | K   | 0  | 147.113  |         |                     | 147.113         |

#### general information

|                       |             |
|-----------------------|-------------|
| Annotation:           | 11 of 15    |
| AminoAcids Coverage:  | 73 %        |
| Intensity Coverage:   | 35 %        |
| Protein Localisation: | 321 ... 335 |

Source: 201 20530\_VR\_Bsu\_TripleSILAC\_pWTPPrkCPrpC\_F09  
 Scannumber: 5787  
 Protein: BSU05000; yddK  
 Peptide Score: 50.87  
 Method: ITMS; CID; 3

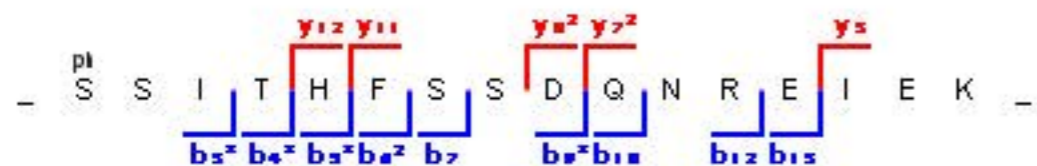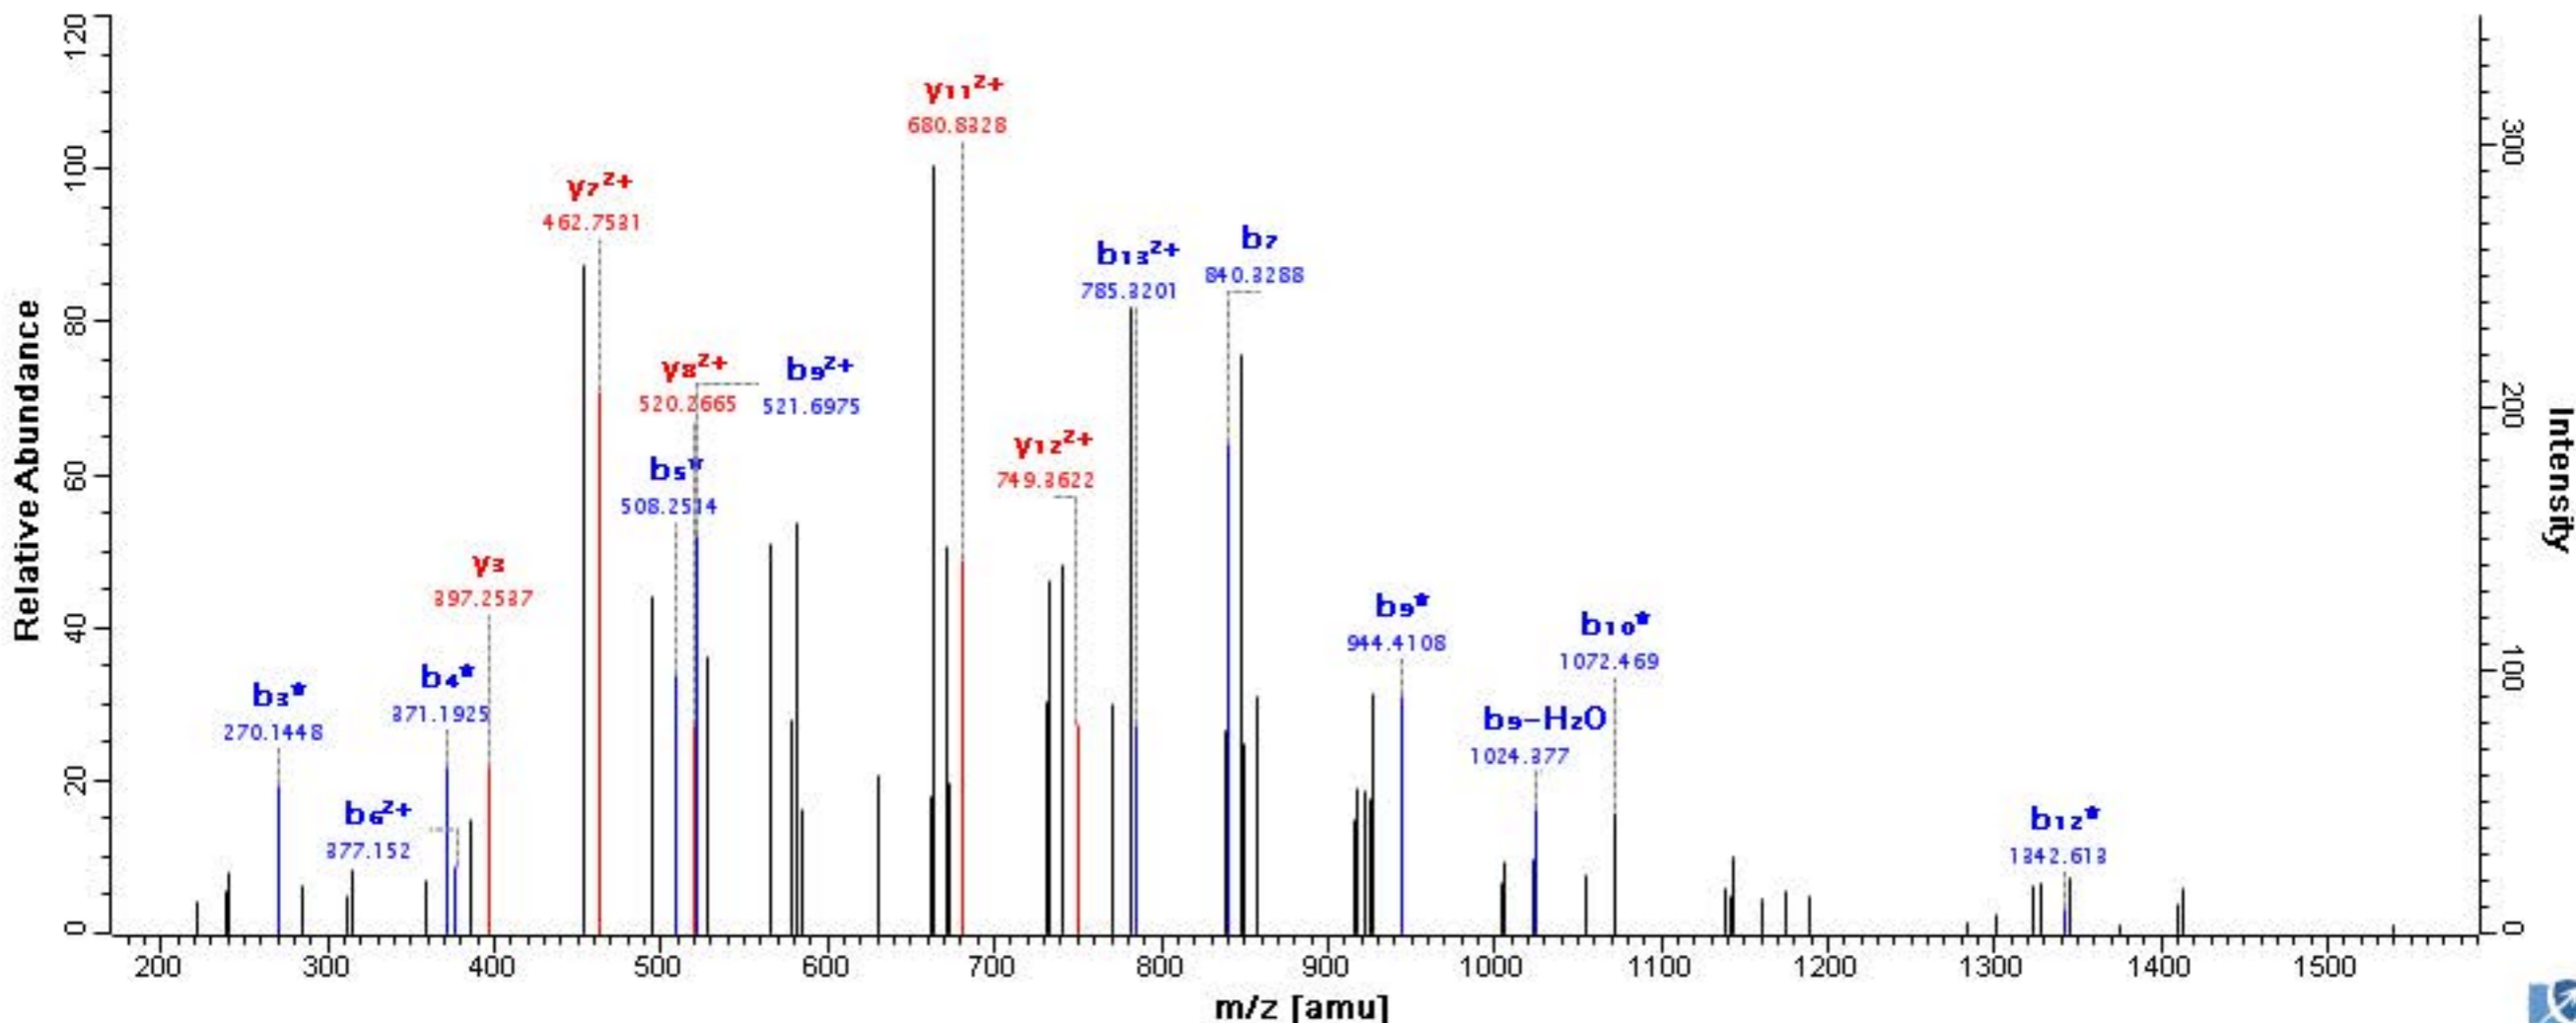

#### precursor information

|                   |                     |
|-------------------|---------------------|
| Mass:             | 1956.85791          |
| m/z:              | System.Collections. |
| Charge:           | System.Collections. |
| Retentiontime:    | System.Collections. |
| Score:            | 50.87437            |
| Mass Error [ppm]: | 0.033205            |
| PEP:              | 0.044176            |
| Precursor Type:   | MULTI               |

#### general information

|                       |            |
|-----------------------|------------|
| Annotation:           | 10 of 16   |
| AminoAcids Coverag    | 62 %       |
| Intensity Coverage:   | 28 %       |
| Protein Localisation: | 99 ... 114 |

| b <sup>2+</sup> ion |          | b ion     |          |     | y ion |          | y <sup>2+</sup> ion |           |                    |
|---------------------|----------|-----------|----------|-----|-------|----------|---------------------|-----------|--------------------|
| Δ dalton            | mass     | Δ dalton  | mass     | seq |       | Δ dalton | mass                | Δ dalton  | mass               |
|                     | 168.0056 |           | 168.0056 | 1   | S     | 15       |                     |           |                    |
|                     | 255.0377 |           | 255.0377 | 2   | S     | 14       | 1798.881            |           | 1798.881           |
|                     | 368.1217 |           | 368.1217 | 3   | I     | 13       | 1711.849            |           | 1711.849           |
|                     | 469.1694 |           | 469.1694 | 4   | T     | 12       | 1598.765            |           | 1598.765           |
|                     | 606.2283 |           | 606.2283 | 5   | H     | 11       | 1497.717            |           | 749.3622 +0.370736 |
| -0.463894           | 377.152  |           | 753.2967 | 6   | F     | 10       | 1360.658            |           | 680.8328 +0.155563 |
|                     | 840.3288 | -0.363367 | 840.3288 | 7   | S     | 9        | 1213.59             |           | 1213.59            |
|                     | 927.3608 |           | 927.3608 | 8   | S     | 8        | 1126.558            |           | 1126.558           |
| -0.03631            | 521.6975 |           | 1042.388 | 9   | D     | 7        | 1039.526            |           | 520.2665 +0.212765 |
|                     | 1170.446 |           | 1170.446 | 10  | Q     | 6        | 924.4989            |           | 462.7531 +0.169718 |
|                     | 1284.489 |           | 1284.489 | 11  | N     | 5        | 796.4403            |           | 796.4403           |
|                     | 1440.59  |           | 1440.59  | 12  | R     | 4        | 682.3974            |           | 682.3974           |
| -0.062723           | 785.3201 |           | 1569.633 | 13  | E     | 3        | 526.2963            |           | 526.2963           |
|                     | 1682.717 |           | 1682.717 | 14  | I     | 2        | 397.2537            | +0.115603 | 397.2537           |
|                     | 1811.76  |           | 1811.76  | 15  | E     | 1        | 284.1696            |           | 284.1696           |
|                     |          |           |          | 16  | K     | 0        | 155.127             |           | 155.127            |

Source: 20120530\_VR\_Bsu\_TripleSILAC\_pWTPrkCPrpC\_F09  
 Scannumber: 9885  
 Protein: BSU16100; sucD  
 Peptide Score: 127.5  
 Method: ITMS; CID; 3

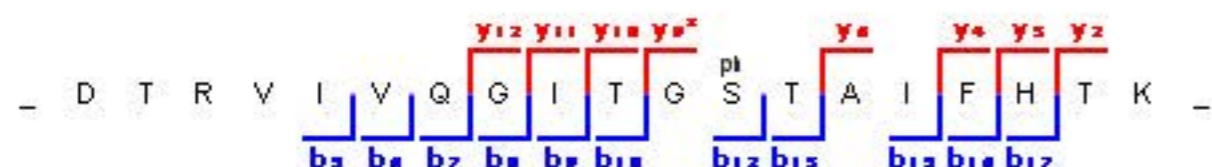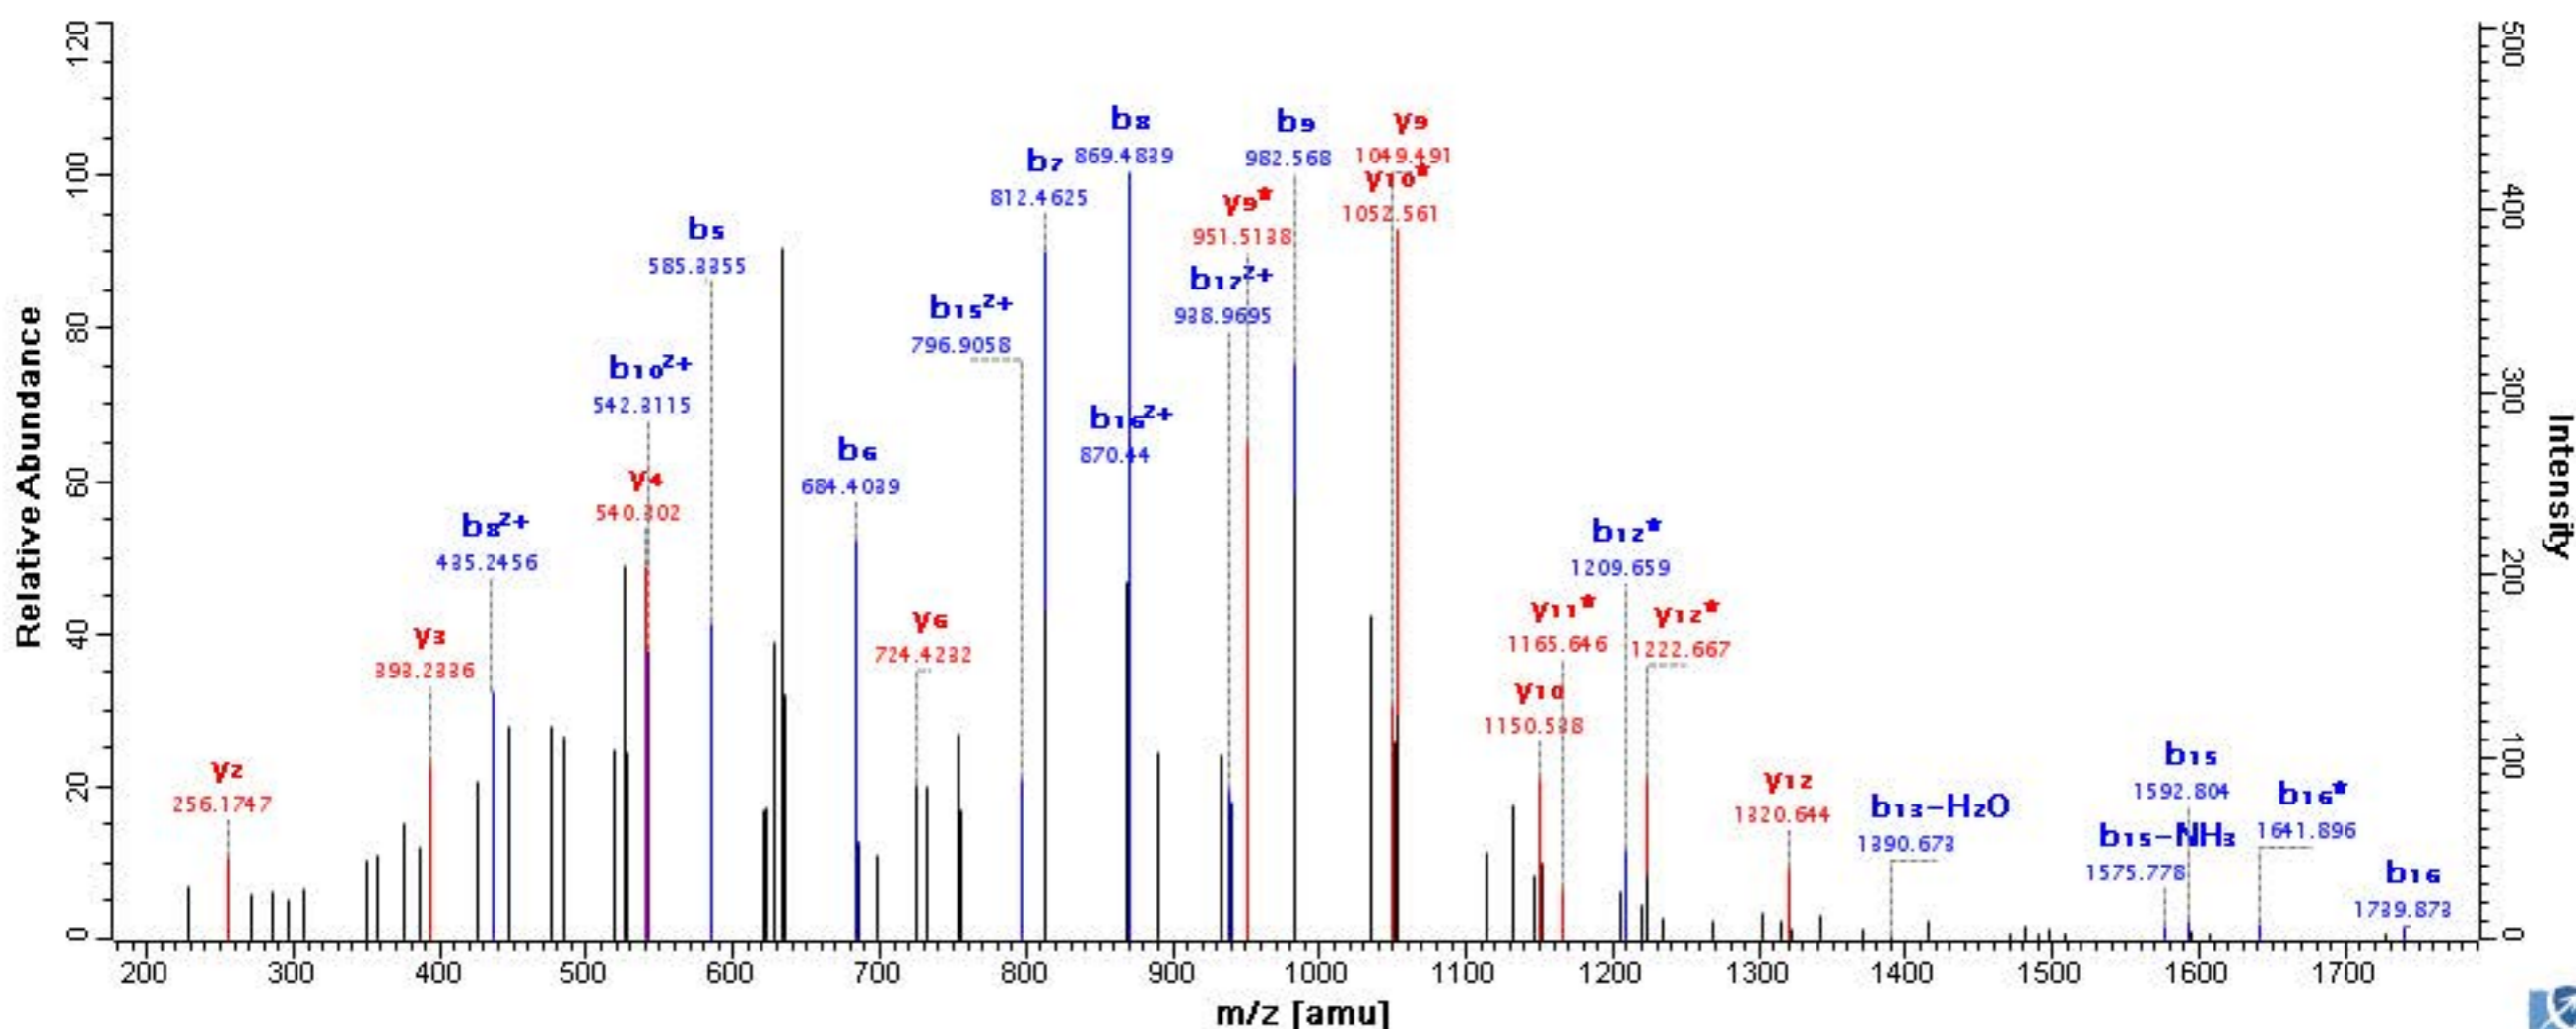

#### precursor information

|                   |                     |
|-------------------|---------------------|
| Mass:             | 2123.07742          |
| m/z:              | System.Collections. |
| Charge:           | System.Collections. |
| Retentiontime:    | System.Collections. |
| Score:            | 127.4995            |
| Mass Error [ppm]: | -0.094755           |
| PEP:              | 1.58E-20            |
| Precursor Type:   | MULTI               |

| b <sup>2+</sup> ion |              | b ion      |              |     | y ion |          |              |            |
|---------------------|--------------|------------|--------------|-----|-------|----------|--------------|------------|
| Δ dalton            | mass         | Δ dalton   | mass         | seq |       | Δ dalton | mass         |            |
|                     | 116.0342195  |            | 116.0342195  | 1   | D     | 18       |              |            |
|                     | 217.08189797 |            | 217.08189797 | 2   | T     | 17       | 2017.072151  |            |
|                     | 373.183009   |            | 373.183009   | 3   | R     | 16       | 1916.0244726 |            |
|                     | 472.25142292 |            | 472.25142292 | 4   | V     | 15       | 1759.9233615 |            |
|                     | 585.3354869  | -0.0881114 | 585.3354869  | 5   | I     | 14       | 1660.8549476 |            |
|                     | 684.40390081 | -0.0683906 | 684.40390081 | 6   | V     | 13       | 1547.7708836 |            |
|                     | 812.46247833 | +0.1201022 | 812.46247833 | 7   | Q     | 12       | 1448.7024697 |            |
| +0.2584191          | 435.24560926 | +0.2595272 | 869.48394205 | 8   | G     | 11       | 1320.6438922 | +0.0824262 |
|                     | 982.56800603 | -0.0311408 | 982.56800603 | 9   | I     | 10       | 1263.6224285 |            |
| +0.1724062          | 542.31148048 |            | 1083.6156845 | 10  | T     | 9        | 1150.5383645 | +0.097866  |
|                     | 1140.6371482 |            | 1140.6371482 | 11  | G     | 8        | 1049.490686  | +0.1224732 |
|                     | 1307.635507  |            | 1307.635507  | 12  | S     | 7        | 992.4692223  |            |
|                     | 1408.6831855 |            | 1408.6831855 | 13  | T     | 6        | 825.47086348 |            |
|                     | 1479.7202993 |            | 1479.7202993 | 14  | A     | 5        | 724.423185   | -0.1206337 |
| +0.4615507          | 796.90581988 | -0.0438652 | 1592.8043633 | 15  | I     | 4        | 653.38607122 |            |
| +0.1692871          | 870.44002684 | +0.1488292 | 1739.8727772 | 16  | F     | 3        | 540.30200724 | +0.0289254 |
| -0.0908207          | 938.96948277 |            | 1876.9316891 | 17  | H     | 2        | 393.23359332 | +0.1426884 |
|                     | 1977.9793675 |            | 1977.9793675 | 18  | T     | 1        | 256.17468146 | -0.0794971 |
|                     |              |            |              | 19  | K     | 0        | 155.12700298 |            |

#### general information

|                       |          |
|-----------------------|----------|
| Annotation:           | 14 of 19 |
| AminoAcids Coverag    | 74%      |
| Intensity Coverage:   | 46%      |
| Protein Localisation: | 8 ... 26 |

Source: 201 20530\_VR\_Bsu\_TripleSILAC\_pWTPPrkCPrpC\_F11  
 Scannumber: 5267  
 Protein: BSU03480; srfA; srfA1; srfAA  
 Peptide Score: 92.8  
 Method: ITMS; CID; 3

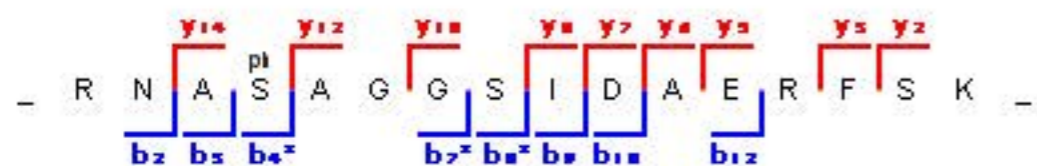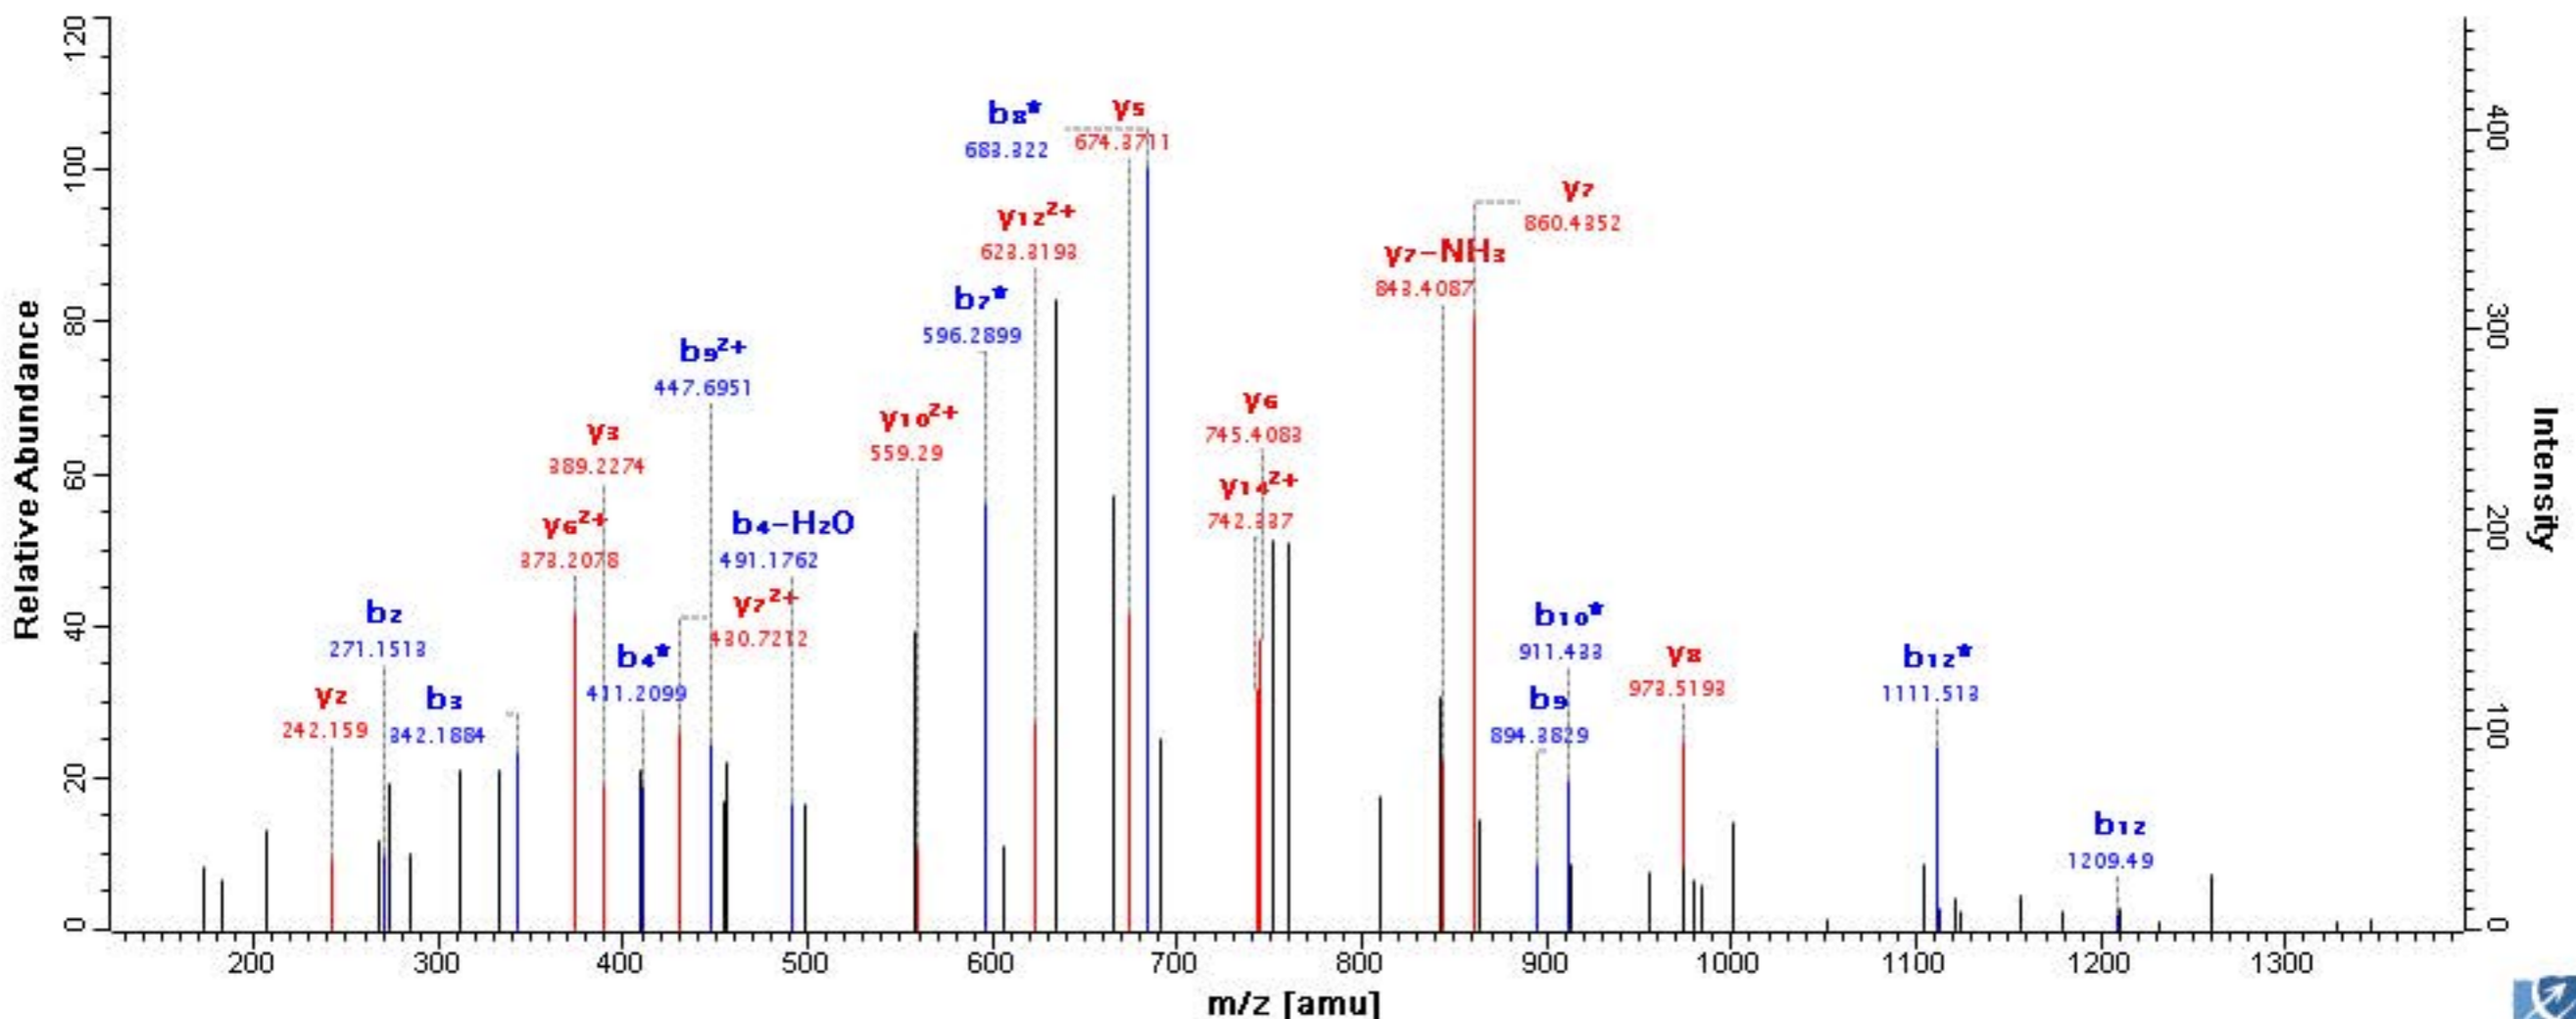

#### precursor information

|                   |                     |
|-------------------|---------------------|
| Mass:             | 1744.7891           |
| m/z:              | System.Collections. |
| Charge:           | System.Collections. |
| Retentiontime:    | System.Collections. |
| Score:            | 92.80044            |
| Mass Error [ppm]: | -0.15486            |
| PEP:              | 6.7929E-06          |
| Precursor Type:   | MULTI               |

#### general information

|                       |             |
|-----------------------|-------------|
| Annotation:           | 13 of 16    |
| AminoAcids Coverag    | 81 %        |
| Intensity Coverage:   | 48 %        |
| Protein Localisation: | 214 ... 229 |

| b <sup>2+</sup> ion |          | b ion     |          |     | y ion |          | y <sup>2+</sup> ion |           |                    |
|---------------------|----------|-----------|----------|-----|-------|----------|---------------------|-----------|--------------------|
| Δ dalton            | mass     | Δ dalton  | mass     | seq |       | Δ dalton | mass                | Δ dalton  | mass               |
|                     | 157.1084 |           | 157.1084 | 1   | R     | 15       |                     |           |                    |
|                     | 271.1513 | -0.320504 | 271.1513 | 2   | N     | 14       | 1597.71             |           | 1597.71            |
|                     | 342.1884 | -0.03108  | 342.1884 | 3   | A     | 13       | 1483.667            |           | 742.337 +0.299369  |
|                     | 509.1868 |           | 509.1868 | 4   | S     | 12       | 1412.63             |           | 1412.63            |
|                     | 580.2239 |           | 580.2239 | 5   | A     | 11       | 1245.631            |           | 623.3193 +0.335904 |
|                     | 637.2454 |           | 637.2454 | 6   | G     | 10       | 1174.594            |           | 1174.594           |
|                     | 694.2668 |           | 694.2668 | 7   | G     | 9        | 1117.573            |           | 559.29 -0.178996   |
|                     | 781.2989 |           | 781.2989 | 8   | S     | 8        | 1060.551            |           | 1060.551           |
| -0.276642           | 447.6951 | +0.035353 | 894.3829 | 9   | I     | 7        | 973.5193            | +0.003496 | 973.5193           |
|                     | 1009.41  |           | 1009.41  | 10  | D     | 6        | 860.4352            | -0.076991 | 430.7212 -0.145863 |
|                     | 1080.447 |           | 1080.447 | 11  | A     | 5        | 745.4083            | -0.028441 | 373.2078 +0.126947 |
|                     | 1209.49  | -0.246529 | 1209.49  | 12  | E     | 4        | 674.3711            | +0.132879 | 674.3711           |
|                     | 1365.591 |           | 1365.591 | 13  | R     | 3        | 545.3286            |           | 545.3286           |
|                     | 1512.659 |           | 1512.659 | 14  | F     | 2        | 389.2274            | +0.432589 | 389.2274           |
|                     | 1599.691 |           | 1599.691 | 15  | S     | 1        | 242.159             | -0.222065 | 242.159            |
|                     |          |           |          | 16  | K     | 0        | 155.127             |           | 155.127            |

Source: 20120530\_VR\_Bsu\_TripleSILAC\_pWTPPrkCPrpC\_F11  
 Scannumber: 7090  
 Protein: BSU32110; yumC  
 Peptide Score: 78.93  
 Method: ITMS; CID; 3

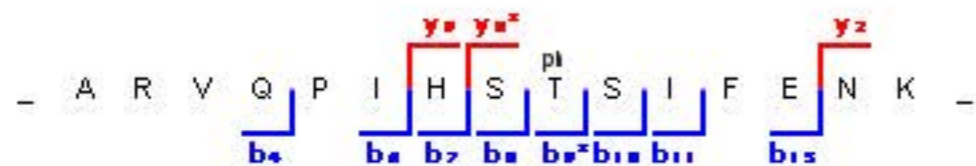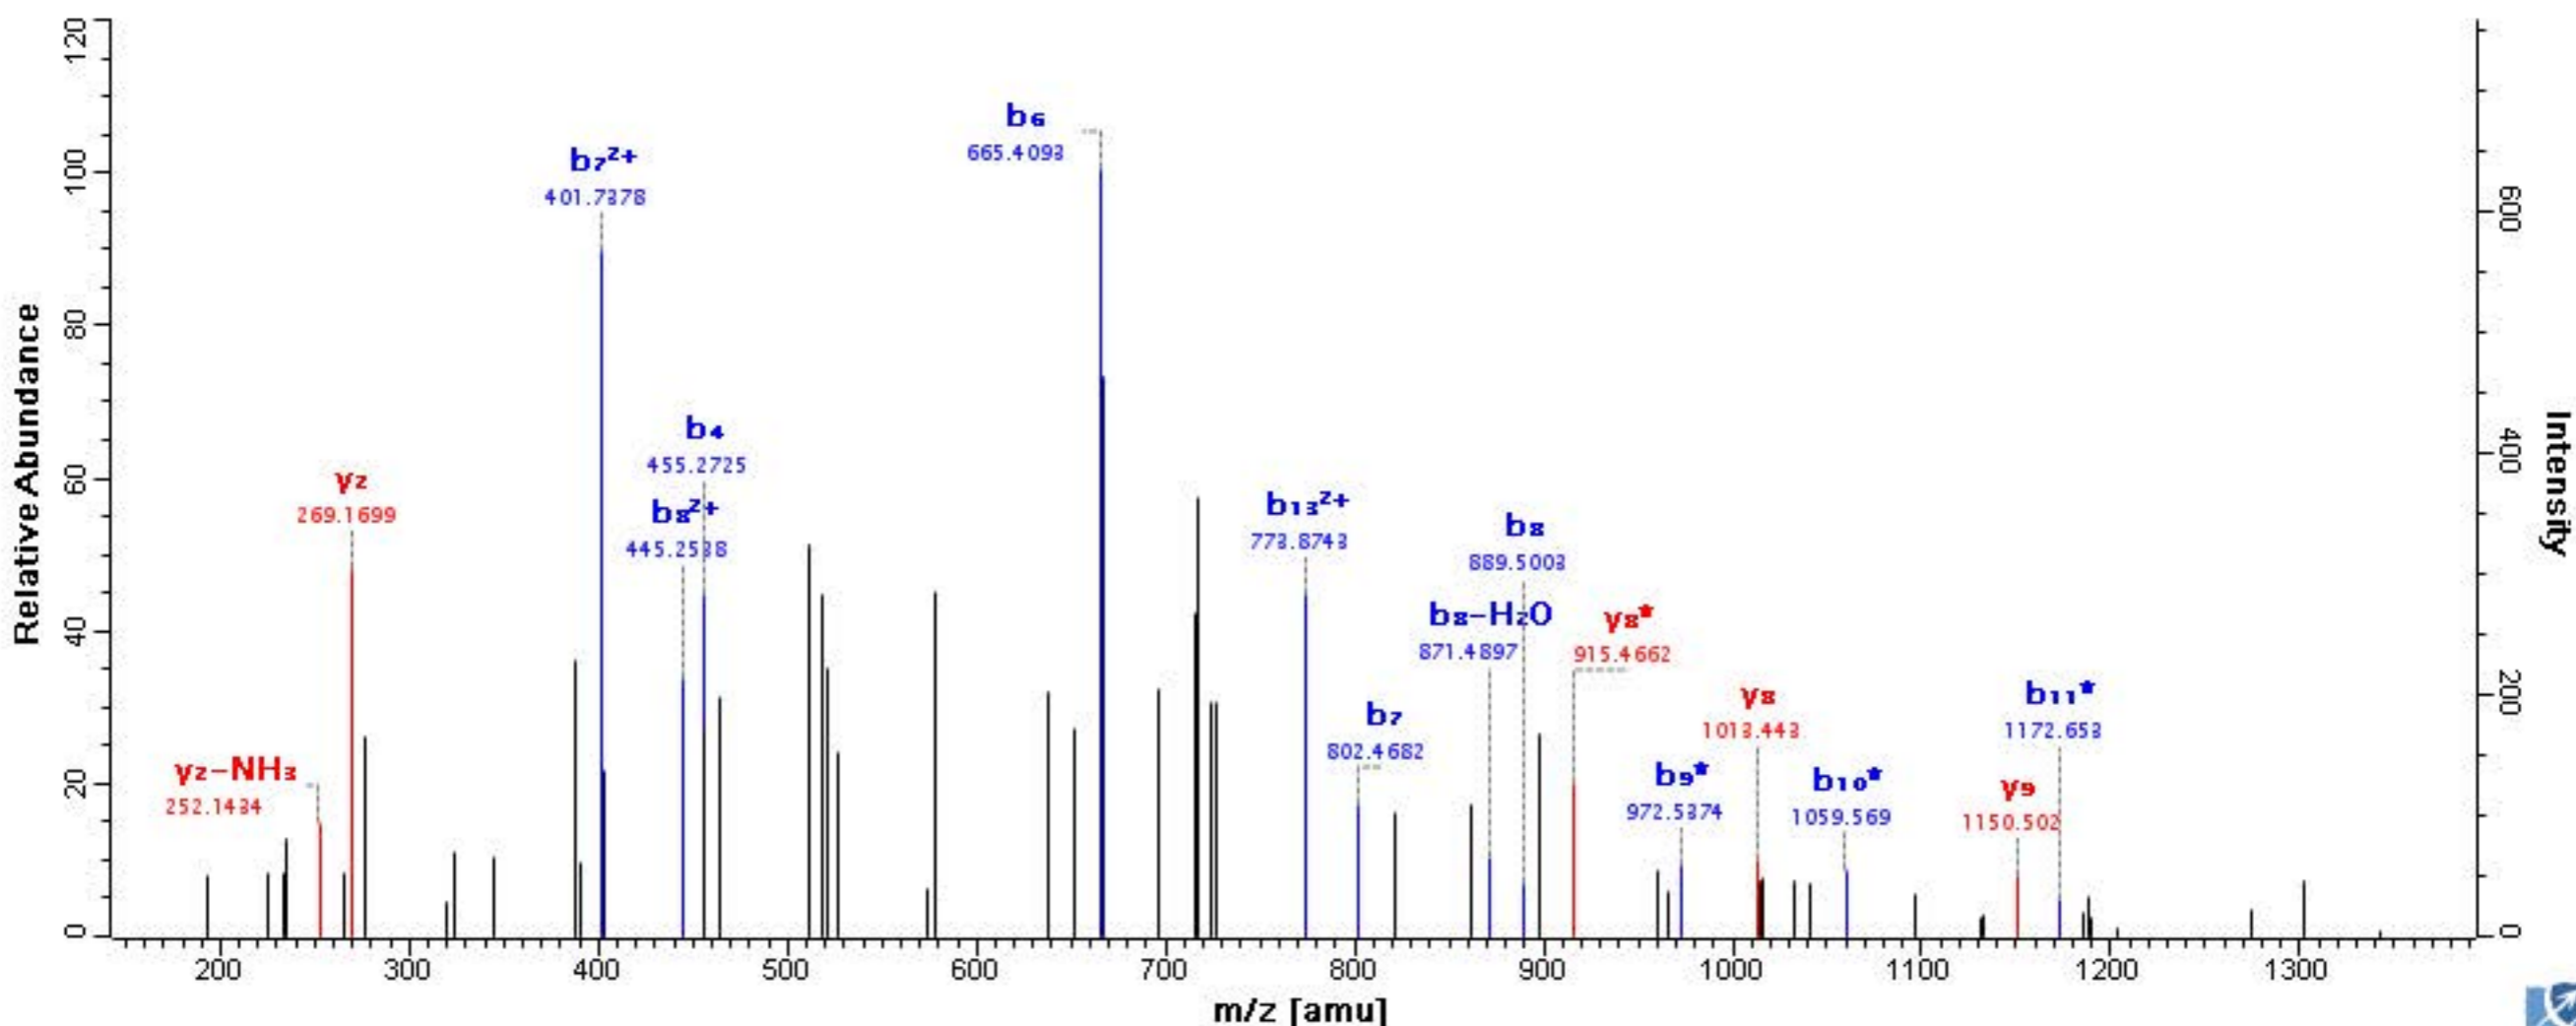

#### precursor information

|                   |                     |
|-------------------|---------------------|
| Mass:             | 1805.88212          |
| m/z:              | System.Collections. |
| Charge:           | System.Collections. |
| Retentiontime:    | System.Collections. |
| Score:            | 78.93159            |
| Mass Error [ppm]: | -0.23566            |
| PEP:              | 0.00094053          |
| Precursor Type:   | MULTI               |

#### general information

|                       |             |
|-----------------------|-------------|
| Annotation:           | 9 of 15     |
| AminoAcids Coverag    | 60 %        |
| Intensity Coverage:   | 34 %        |
| Protein Localisation: | 318 ... 332 |

| b <sup>2+</sup> ion |              | b ion      |              |    |     |    | y ion        |            |
|---------------------|--------------|------------|--------------|----|-----|----|--------------|------------|
| Δ dalton            | mass         | Δ dalton   | mass         |    | seq |    | Δ dalton     | mass       |
|                     | 72.044390254 |            | 72.044390254 | 1  | A   | 14 |              |            |
|                     | 228.14550128 |            | 228.14550128 | 2  | R   | 13 | 1743.8669093 |            |
|                     | 327.2139152  |            | 327.2139152  | 3  | V   | 12 | 1587.7657982 |            |
|                     | 455.27249271 | +0.0929248 | 455.27249271 | 4  | Q   | 11 | 1488.6973843 |            |
|                     | 552.32525656 |            | 552.32525656 | 5  | P   | 10 | 1360.6388068 |            |
|                     | 665.40932054 | -0.024738  | 665.40932054 | 6  | I   | 9  | 1263.586043  |            |
| +0.0120014          | 401.73775444 | -0.1781323 | 802.4682324  | 7  | H   | 8  | 1150.501979  | +0.1630601 |
| -0.023422           | 445.25376864 | +0.0500932 | 889.50026081 | 8  | S   | 7  | 1013.4430671 | +0.336718  |
|                     | 1070.5142697 |            | 1070.5142697 | 9  | T   | 6  | 926.41103872 |            |
|                     | 1157.5462981 |            | 1157.5462981 | 10 | S   | 5  | 745.39702983 |            |
|                     | 1270.6303621 |            | 1270.6303621 | 11 | I   | 4  | 658.36500142 |            |
|                     | 1417.698776  |            | 1417.698776  | 12 | F   | 3  | 545.28093744 |            |
| +0.4686338          | 773.87432278 |            | 1546.7413691 | 13 | E   | 2  | 398.21252353 |            |
|                     | 1660.7842965 |            | 1660.7842965 | 14 | N   | 1  | 269.16993043 | +0.0739661 |
|                     |              |            |              | 15 | K   | 0  | 155.12700298 |            |



Source: 20120530\_VR\_Bsu\_TripleSILAC\_pWTPrkCPrpC\_F11  
 Scannumber: 8292  
 Protein: BSU29760; ytxJ  
 Peptide Score: 122.33  
 Method: ITMS; CID; 3

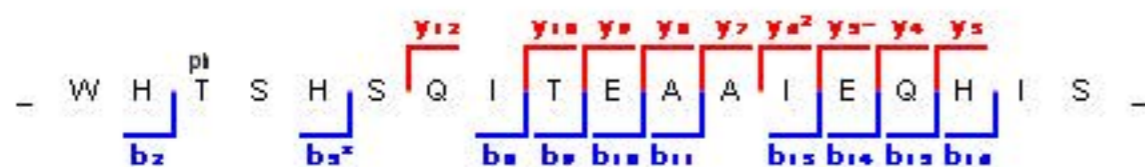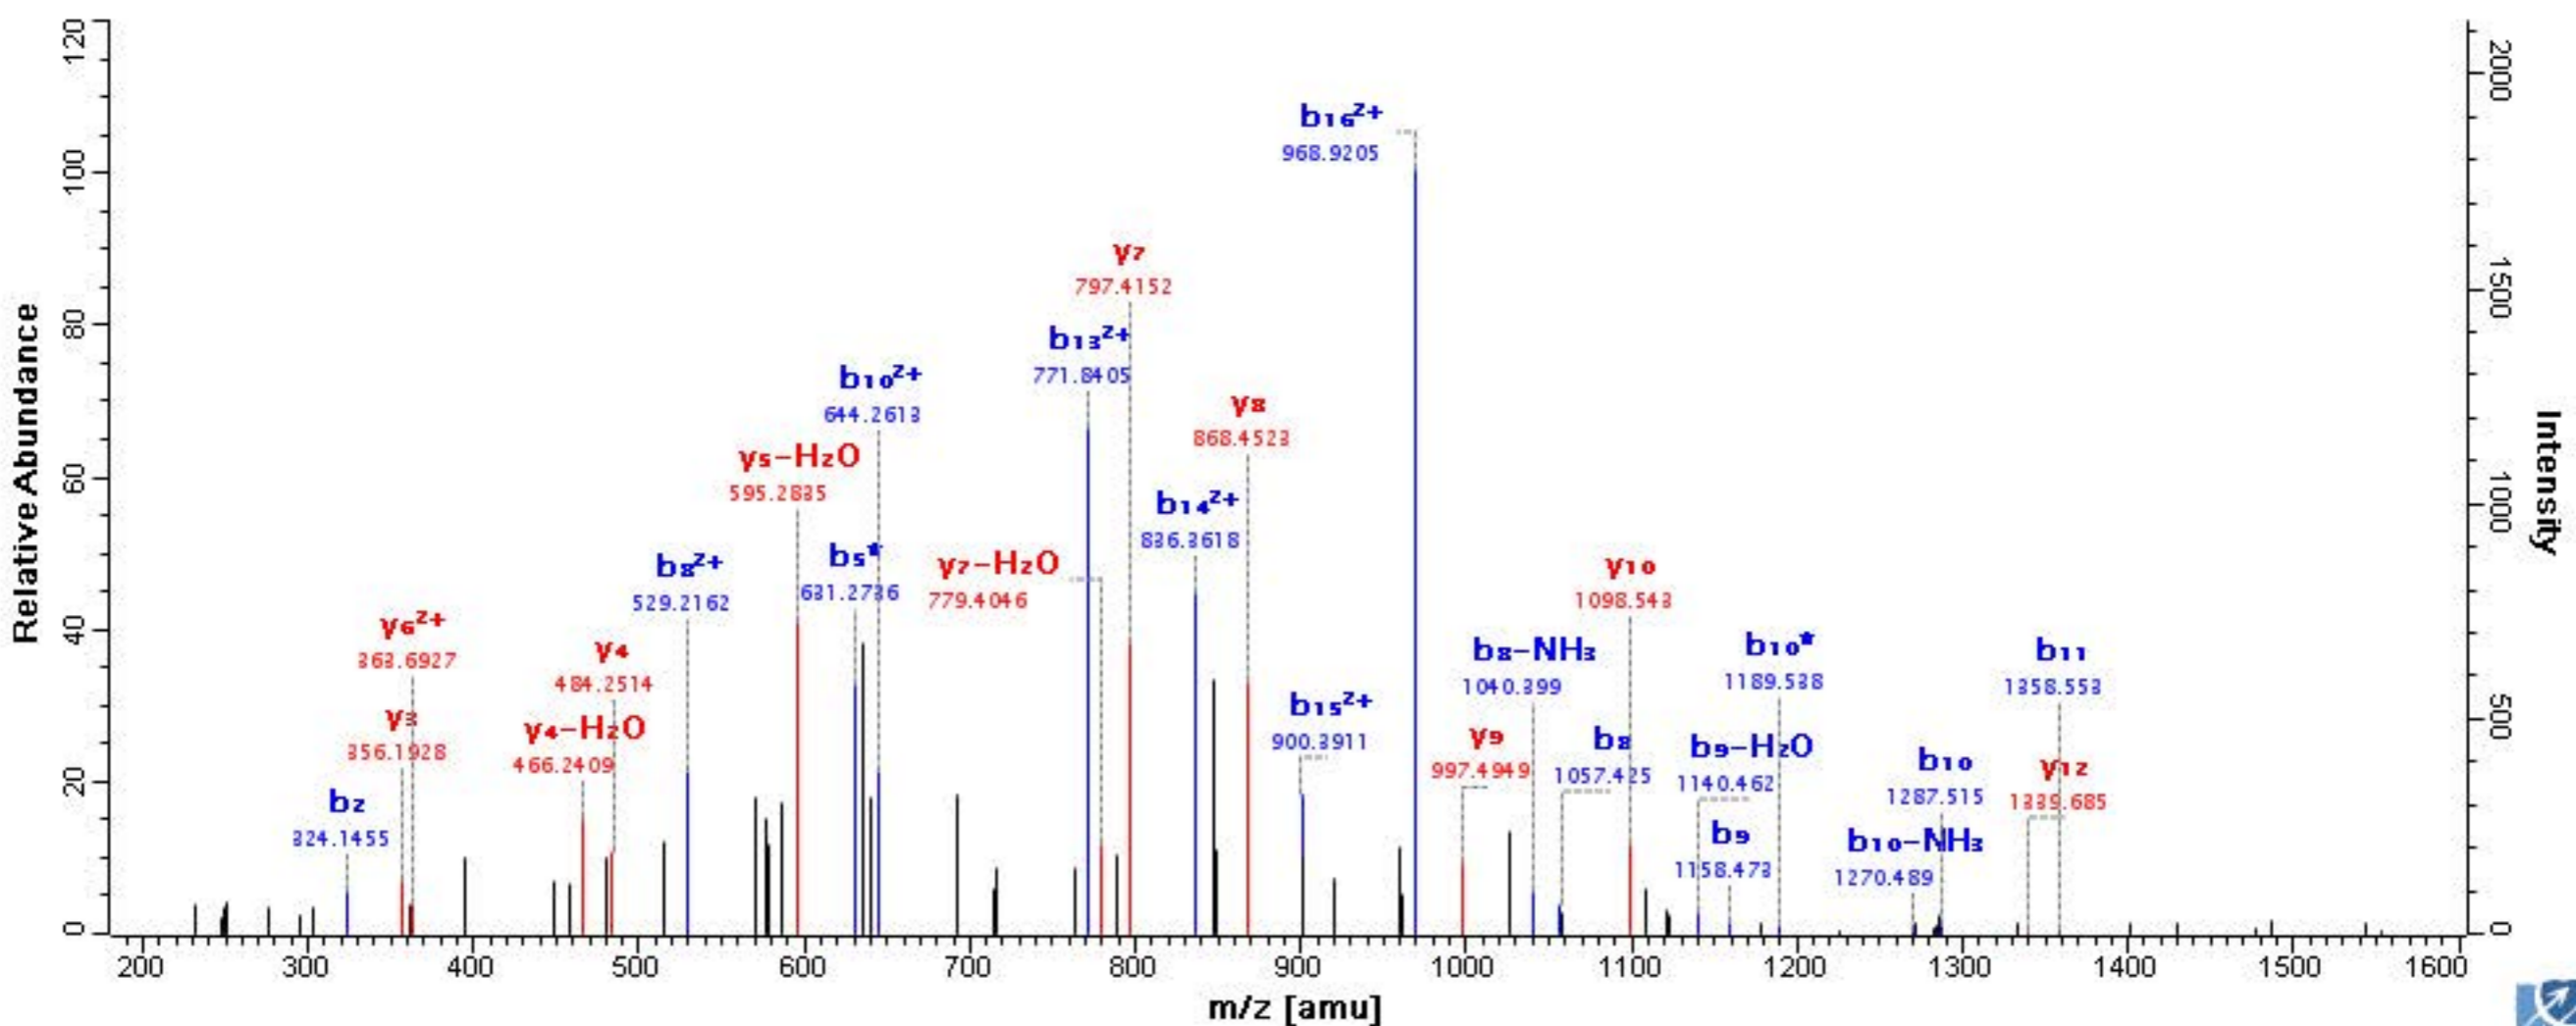

#### precursor information

|                   |                     |
|-------------------|---------------------|
| Mass:             | 2153.95342          |
| m/z:              | System.Collections. |
| Charge:           | System.Collections. |
| Retentiontime:    | System.Collections. |
| Score:            | 122.327             |
| Mass Error [ppm]: | 0.12468             |
| PEP:              | 2.4696E-07          |
| Precursor Type:   | ISO                 |

#### general information

|                       |            |
|-----------------------|------------|
| Annotation:           | 12 of 18   |
| AminoAcids Coverag    | 67 %       |
| Intensity Coverage:   | 58 %       |
| Protein Localisation: | 91 ... 108 |

| b <sup>2+</sup> ion |          | b ion     |          | seq |   |    | y ion    |           | y <sup>2+</sup> ion |           |
|---------------------|----------|-----------|----------|-----|---|----|----------|-----------|---------------------|-----------|
| Δ dalton            | mass     | Δ dalton  | mass     |     |   |    | Δ dalton | mass      | Δ dalton            | mass      |
|                     | 187.0866 |           | 187.0866 | 1   | W | 17 |          |           |                     |           |
|                     | 324.1455 | +0.088202 | 324.1455 | 2   | H | 16 | 1968.881 |           | 1968.881            |           |
|                     | 505.1595 |           | 505.1595 | 3   | T | 15 | 1831.822 |           | 1831.822            |           |
|                     | 592.1915 |           | 592.1915 | 4   | S | 14 | 1650.808 |           | 1650.808            |           |
|                     | 729.2505 |           | 729.2505 | 5   | H | 13 | 1563.776 |           | 1563.776            |           |
|                     | 816.2825 |           | 816.2825 | 6   | S | 12 | 1426.717 |           | 1426.717            |           |
|                     | 944.3411 |           | 944.3411 | 7   | Q | 11 | 1339.685 | -0.043741 | 1339.685            |           |
| +0.147815           | 529.2162 | -0.345897 | 1057.425 | 8   | I | 10 | 1211.627 |           | 1211.627            |           |
|                     | 1158.473 | +0.29661  | 1158.473 | 9   | T | 9  | 1098.543 | +0.058251 | 1098.543            |           |
| -0.095746           | 644.2613 | +0.136952 | 1287.515 | 10  | E | 8  | 997.4949 | +0.108188 | 997.4949            |           |
|                     | 1358.553 | +0.32579  | 1358.553 | 11  | A | 7  | 868.4523 | -0.04563  | 868.4523            |           |
|                     | 1429.59  |           | 1429.59  | 12  | A | 6  | 797.4152 | +0.079984 | 797.4152            |           |
| +0.314366           | 771.8405 |           | 1542.674 | 13  | I | 5  | 726.3781 |           | 363.6927            | -0.131826 |
| +0.131693           | 836.3618 |           | 1671.716 | 14  | E | 4  | 613.294  |           | 613.294             |           |
| +0.22423            | 900.3911 |           | 1799.775 | 15  | Q | 3  | 484.2514 | -0.069172 | 484.2514            |           |
| +0.243785           | 968.9205 |           | 1936.834 | 16  | H | 2  | 356.1928 | +0.090968 | 356.1928            |           |
|                     | 2049.918 |           | 2049.918 | 17  | I | 1  | 219.1339 |           | 219.1339            |           |
|                     |          |           |          | 18  | S | 0  | 106.0499 |           | 106.0499            |           |

Source: 20120530\_VR\_Bsu\_TripleSILAC\_pWTPPrkCPrpC\_F11  
 Scannumber: 8392  
 Protein: BSU10030; hit: yhaE  
 Peptide Score: 56.06  
 Method: ITMS; CID; 3

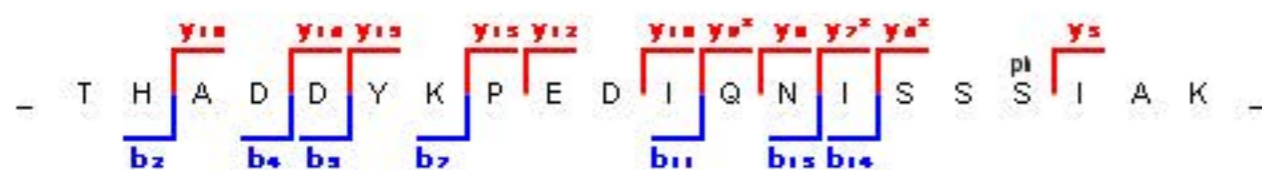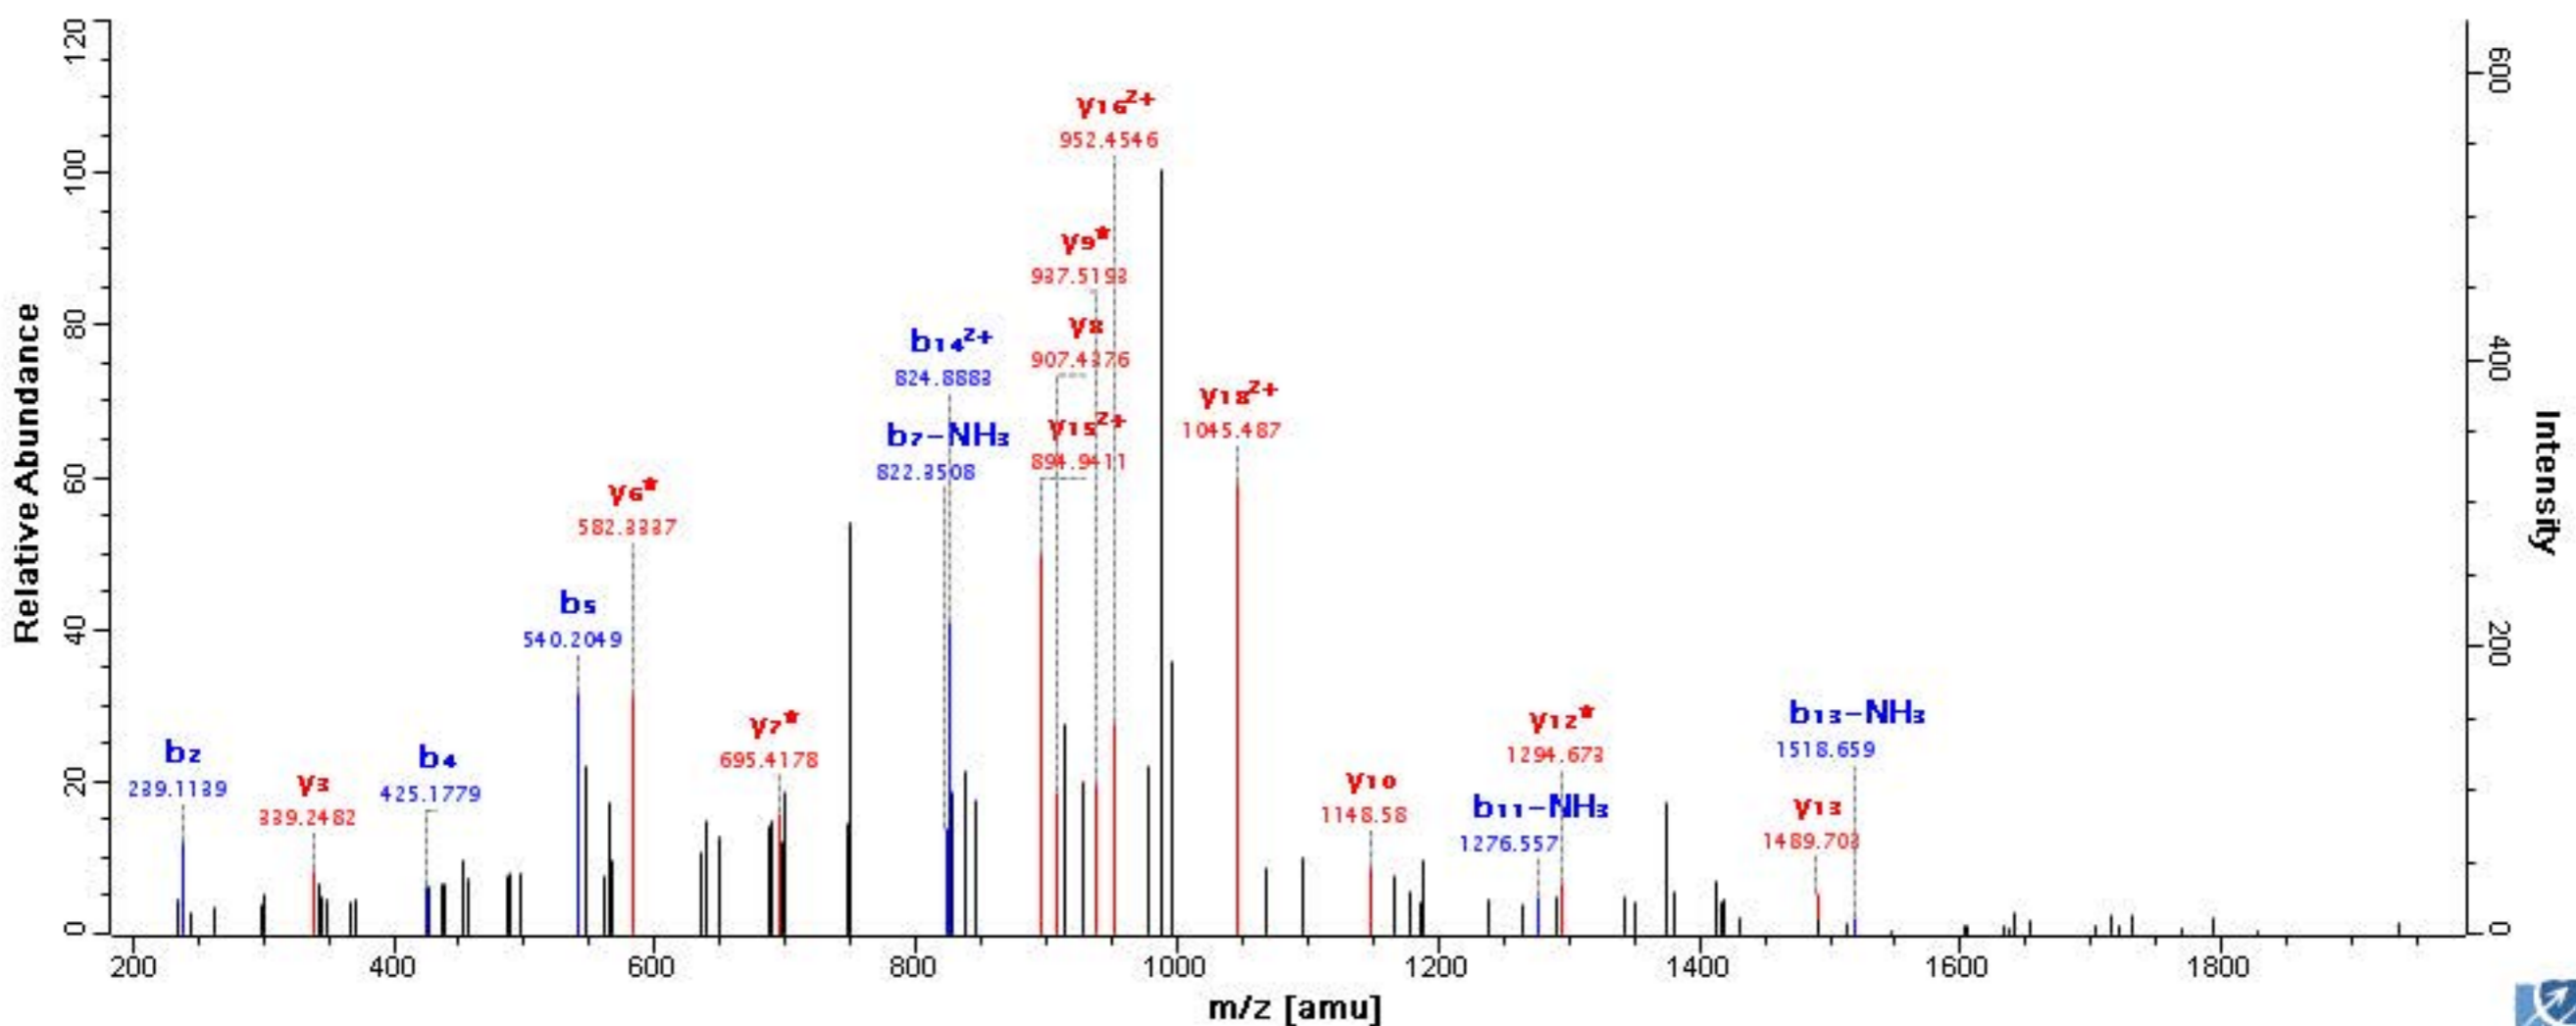

#### precursor information

|                   |                     |
|-------------------|---------------------|
| Mass:             | 2311.03536          |
| m/z:              | System.Collections. |
| Charge:           | System.Collections. |
| Retentiontime:    | System.Collections. |
| Score:            | 56.05522            |
| Mass Error [ppm]: | -0.67569            |
| PEP:              | 0.0197              |
| Precursor Type:   | MULTI               |

| b <sup>2+</sup> ion |          | b ion     |          | seq |   |    | γ ion    |           | γ <sup>2+</sup> ion |           |
|---------------------|----------|-----------|----------|-----|---|----|----------|-----------|---------------------|-----------|
| Δ dalton            | mass     | Δ dalton  | mass     |     |   |    | Δ dalton | mass      | Δ dalton            | mass      |
|                     | 102.055  |           | 102.055  | 1   | T | 19 |          |           |                     |           |
|                     | 239.1139 | +0.007013 | 239.1139 | 2   | H | 18 | 2227.025 |           | 2227.025            |           |
|                     | 310.151  |           | 310.151  | 3   | A | 17 | 2089.966 |           | 1045.487            | +0.475754 |
|                     | 425.1779 | +0.326227 | 425.1779 | 4   | D | 16 | 2018.929 |           | 2018.929            |           |
|                     | 540.2049 | +0.051359 | 540.2049 | 5   | D | 15 | 1903.902 |           | 952.4546            | -0.245818 |
|                     | 703.2682 |           | 703.2682 | 6   | Y | 14 | 1788.875 |           | 894.9411            | +0.142897 |
|                     | 839.3774 |           | 839.3774 | 7   | K | 13 | 1625.812 |           | 1625.812            |           |
|                     | 936.4301 |           | 936.4301 | 8   | P | 12 | 1489.703 | +0.336411 | 1489.703            |           |
|                     | 1065.473 |           | 1065.473 | 9   | E | 11 | 1392.65  |           | 1392.65             |           |
|                     | 1180.5   |           | 1180.5   | 10  | D | 10 | 1263.607 |           | 1263.607            |           |
|                     | 1293.584 |           | 1293.584 | 11  | I | 9  | 1148.58  | +0.215059 | 1148.58             |           |
|                     | 1421.642 |           | 1421.642 | 12  | Q | 8  | 1035.496 |           | 1035.496            |           |
|                     | 1535.685 |           | 1535.685 | 13  | N | 7  | 907.4376 | -0.09158  | 907.4376            |           |
| +0.205894           | 824.8883 |           | 1648.769 | 14  | I | 6  | 793.3947 |           | 793.3947            |           |
|                     | 1735.801 |           | 1735.801 | 15  | S | 5  | 680.3106 |           | 680.3106            |           |
|                     | 1822.833 |           | 1822.833 | 16  | S | 4  | 593.2786 |           | 593.2786            |           |
|                     | 1989.832 |           | 1989.832 | 17  | S | 3  | 506.2465 |           | 506.2465            |           |
|                     | 2102.916 |           | 2102.916 | 18  | I | 2  | 339.2482 | +0.136249 | 339.2482            |           |
|                     | 2173.953 |           | 2173.953 | 19  | A | 1  | 226.1641 |           | 226.1641            |           |
|                     |          |           |          | 20  | K | 0  | 155.127  |           | 155.127             |           |

#### general information

|                       |             |
|-----------------------|-------------|
| Annotation:           | 14 of 20    |
| AminoAcids Coverage:  | 70 %        |
| Intensity Coverage:   | 32 %        |
| Protein Localisation: | 121 ... 140 |

Source: 20120530\_VR\_Bsu\_TripleSILAC\_pWTPPrkCPrpC\_F11  
 Scannumber: 8424  
 Protein: BSU08470; yfhB  
 Peptide Score: 50.1  
 Method: ITMS; CID; 3

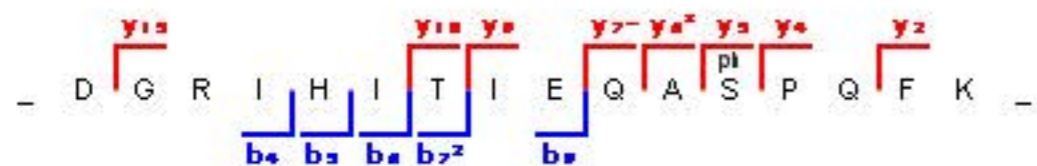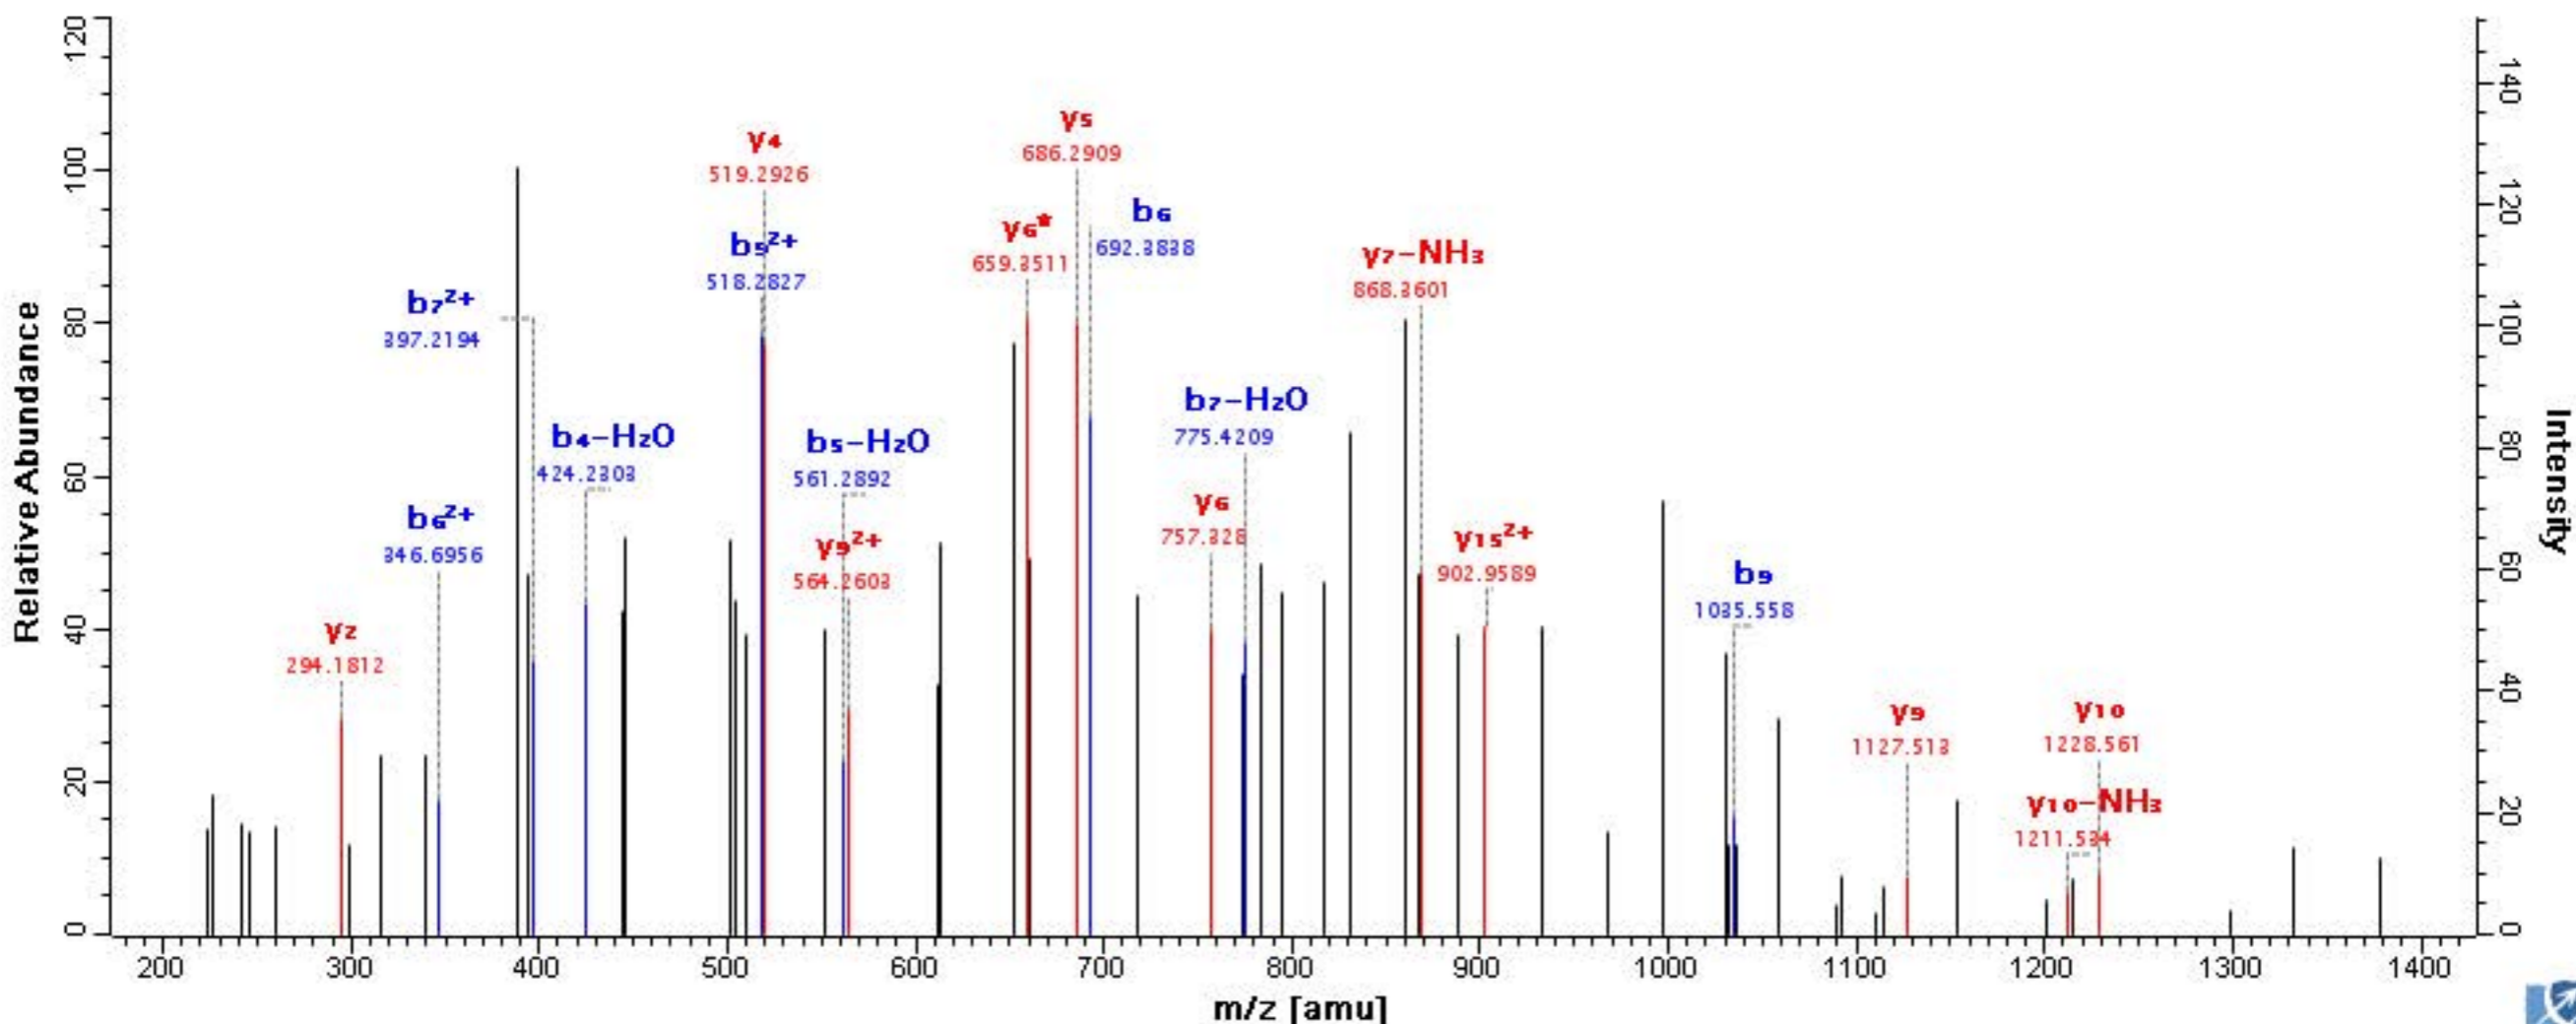

#### precursor information

|                   |                     |
|-------------------|---------------------|
| Mass:             | 1918.9299           |
| m/z:              | System.Collections. |
| Charge:           | System.Collections. |
| Retentiontime:    | System.Collections. |
| Score:            | 50.10182            |
| Mass Error [ppm]: | -0.17091            |
| PEP:              | 0.057813            |
| Precursor Type:   | MULTI               |

| b <sup>2+</sup> ion |          | b ion     |          |     | y ion |          | y <sup>2+</sup> ion |           |          |           |
|---------------------|----------|-----------|----------|-----|-------|----------|---------------------|-----------|----------|-----------|
| Δ dalton            | mass     | Δ dalton  | mass     | seq |       | Δ dalton | mass                | Δ dalton  | mass     |           |
|                     | 116.0342 |           | 116.0342 | 1   | D     | 15       |                     |           |          |           |
|                     | 173.0557 |           | 173.0557 | 2   | G     | 14       | 1804.911            |           | 902.9589 | -0.142573 |
|                     | 329.1568 |           | 329.1568 | 3   | R     | 13       | 1747.889            |           | 1747.889 |           |
|                     | 442.2409 |           | 442.2409 | 4   | I     | 12       | 1591.788            |           | 1591.788 |           |
|                     | 579.2998 |           | 579.2998 | 5   | H     | 11       | 1478.704            |           | 1478.704 |           |
| +0.225831           | 346.6956 | +0.208573 | 692.3838 | 6   | I     | 10       | 1341.645            |           | 1341.645 |           |
| +0.162869           | 397.2194 |           | 793.4315 | 7   | T     | 9        | 1228.561            | +0.330534 | 1228.561 |           |
|                     | 906.5156 |           | 906.5156 | 8   | I     | 8        | 1127.513            | +0.062783 | 564.2603 | +0.165571 |
| -0.015267           | 518.2827 | -0.096866 | 1035.558 | 9   | E     | 7        | 1014.429            |           | 1014.429 |           |
|                     | 1163.617 |           | 1163.617 | 10  | Q     | 6        | 885.3866            |           | 885.3866 |           |
|                     | 1234.654 |           | 1234.654 | 11  | A     | 5        | 757.328             | +0.142183 | 757.328  |           |
|                     | 1401.652 |           | 1401.652 | 12  | S     | 4        | 686.2909            | +0.026342 | 686.2909 |           |
|                     | 1498.705 |           | 1498.705 | 13  | P     | 3        | 519.2926            | -0.115252 | 519.2926 |           |
|                     | 1626.764 |           | 1626.764 | 14  | Q     | 2        | 422.2398            |           | 422.2398 |           |
|                     | 1773.832 |           | 1773.832 | 15  | F     | 1        | 294.1812            | +0.072566 | 294.1812 |           |
|                     |          |           |          | 16  | K     | 0        | 147.1128            |           | 147.1128 |           |

#### general information

|                       |             |
|-----------------------|-------------|
| Annotation:           | 12 of 16    |
| AminoAcids Coverag    | 75 %        |
| Intensity Coverage:   | 33 %        |
| Protein Localisation: | 113 ... 128 |

Source: 20120530\_VR\_Bsu\_TripleSILAC\_pWTPrkCPrpC\_F11  
 Scannumber: 8851  
 Protein: BSU32290; yutF  
 Peptide Score: 63.69  
 Method: ITMS; CID; 3

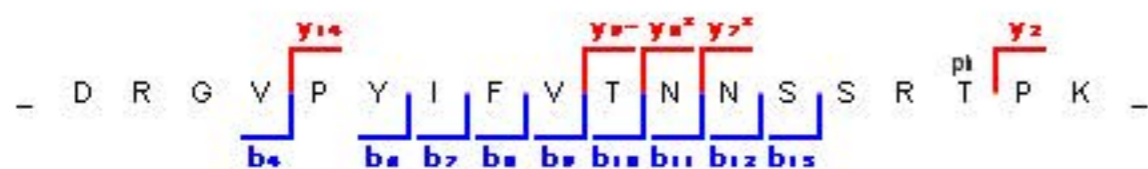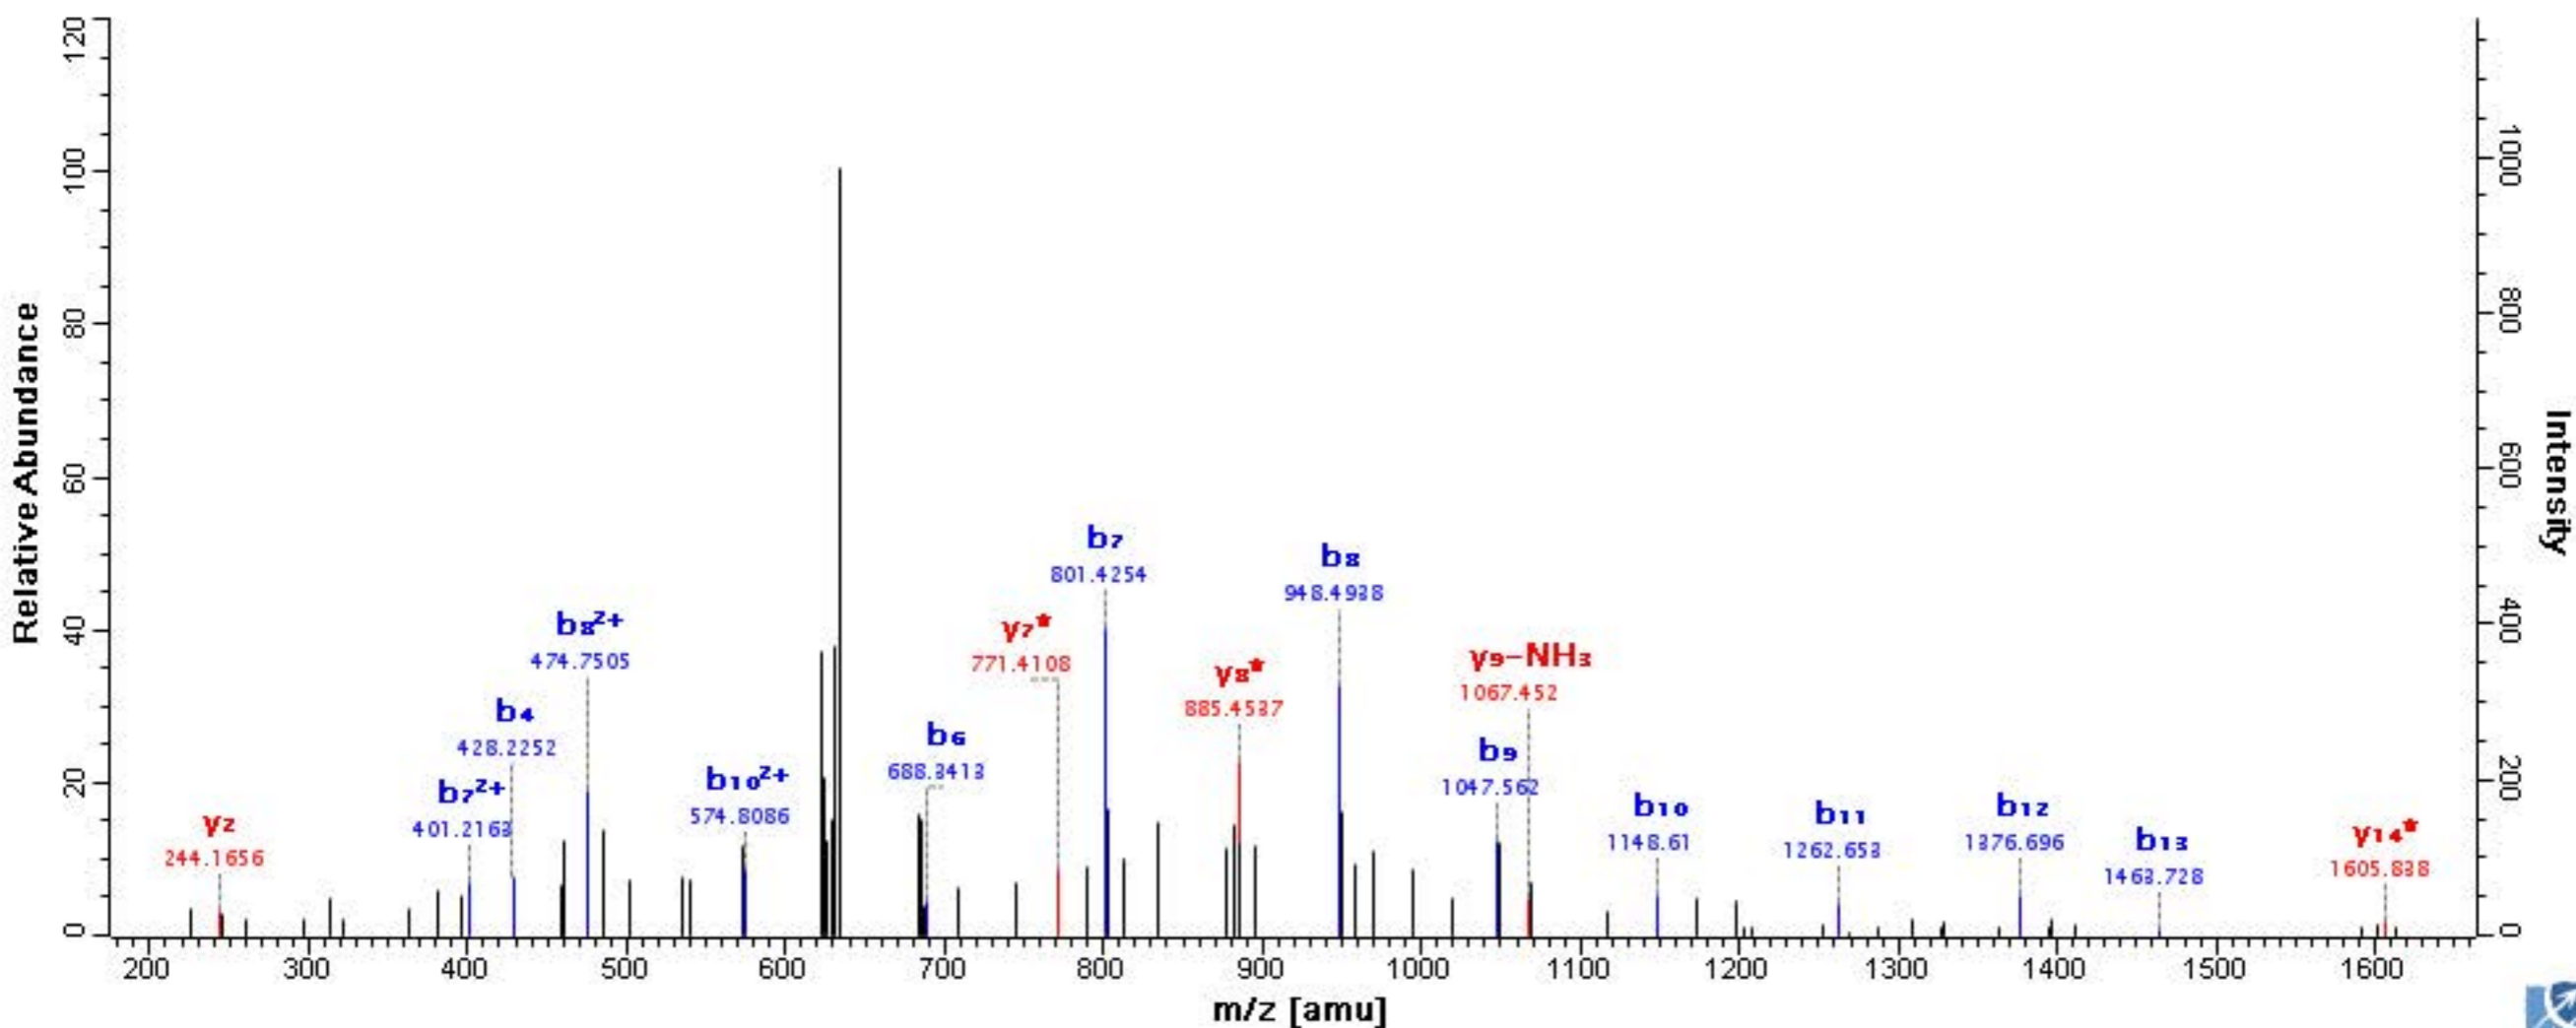

#### precursor information

|                   |                     |
|-------------------|---------------------|
| Mass:             | 2130.02517          |
| m/z:              | System.Collections. |
| Charge:           | System.Collections. |
| Retentiontime:    | System.Collections. |
| Score:            | 63.68993            |
| Mass Error [ppm]: | -0.34926            |
| PEP:              | 0.0053816           |
| Precursor Type:   | MULTI               |

#### general information

|                       |           |
|-----------------------|-----------|
| Annotation:           | 12 of 18  |
| AminoAcids Coverag    | 67 %      |
| Intensity Coverage:   | 25 %      |
| Protein Localisation: | 34 ... 51 |

| b <sup>2+</sup> ion |              | b ion      |              |    |     |    | y ion        |            |
|---------------------|--------------|------------|--------------|----|-----|----|--------------|------------|
| Δ dalton            | mass         | Δ dalton   | mass         |    | seq |    | Δ dalton     | mass       |
|                     | 116.0342195  |            | 116.0342195  | 1  | D   | 17 |              |            |
|                     | 272.13533053 |            | 272.13533053 | 2  | R   | 16 | 2016.006251  |            |
|                     | 329.15679425 |            | 329.15679425 | 3  | G   | 15 | 1859.90514   |            |
|                     | 428.22520817 | +0.1731073 | 428.22520817 | 4  | V   | 14 | 1802.8836762 |            |
|                     | 525.27797202 |            | 525.27797202 | 5  | P   | 13 | 1703.8152623 |            |
|                     | 688.34130056 | +0.0564045 | 688.34130056 | 6  | Y   | 12 | 1606.7624985 |            |
| +0.0792117          | 401.2163205  | +0.0464983 | 801.42536454 | 7  | I   | 11 | 1443.6991699 |            |
| +0.4012059          | 474.75052746 | -0.0165446 | 948.49377845 | 8  | F   | 10 | 1330.615106  |            |
|                     | 1047.5621924 | +0.1284815 | 1047.5621924 | 9  | V   | 9  | 1183.546692  |            |
| -0.4608564          | 574.80857366 | +0.0213547 | 1148.6098708 | 10 | T   | 8  | 1084.4782781 |            |
|                     | 1262.6527983 | +0.0858492 | 1262.6527983 | 11 | N   | 7  | 983.43059965 |            |
|                     | 1376.6957257 | +0.0973651 | 1376.6957257 | 12 | N   | 6  | 869.3876722  |            |
|                     | 1463.7277541 | +0.4232468 | 1463.7277541 | 13 | S   | 5  | 755.34474475 |            |
|                     | 1550.7597826 |            | 1550.7597826 | 14 | S   | 4  | 668.31271634 |            |
|                     | 1706.8608936 |            | 1706.8608936 | 15 | R   | 3  | 581.28068793 |            |
|                     | 1887.8749025 |            | 1887.8749025 | 16 | T   | 2  | 425.17957691 |            |
|                     | 1984.9276663 |            | 1984.9276663 | 17 | P   | 1  | 244.16556802 | +0.0411581 |
|                     |              |            |              | 18 | K   | 0  | 147.11280417 |            |

Source: 201 20530\_VR\_Bsu\_TripleSILAC\_pWTPPrkCPrpC\_F19  
 Scannumber: 10678  
 Protein: BSU33940; gap; gapA  
 Peptide Score: 232.15  
 Method: ITMS; CID; 3

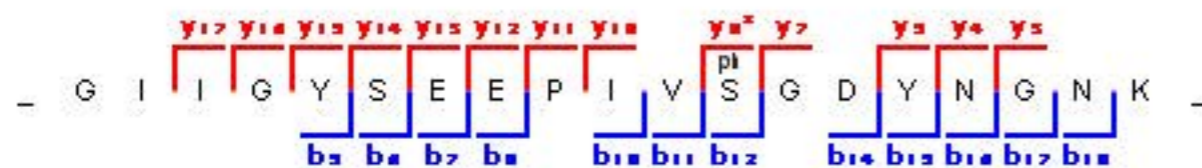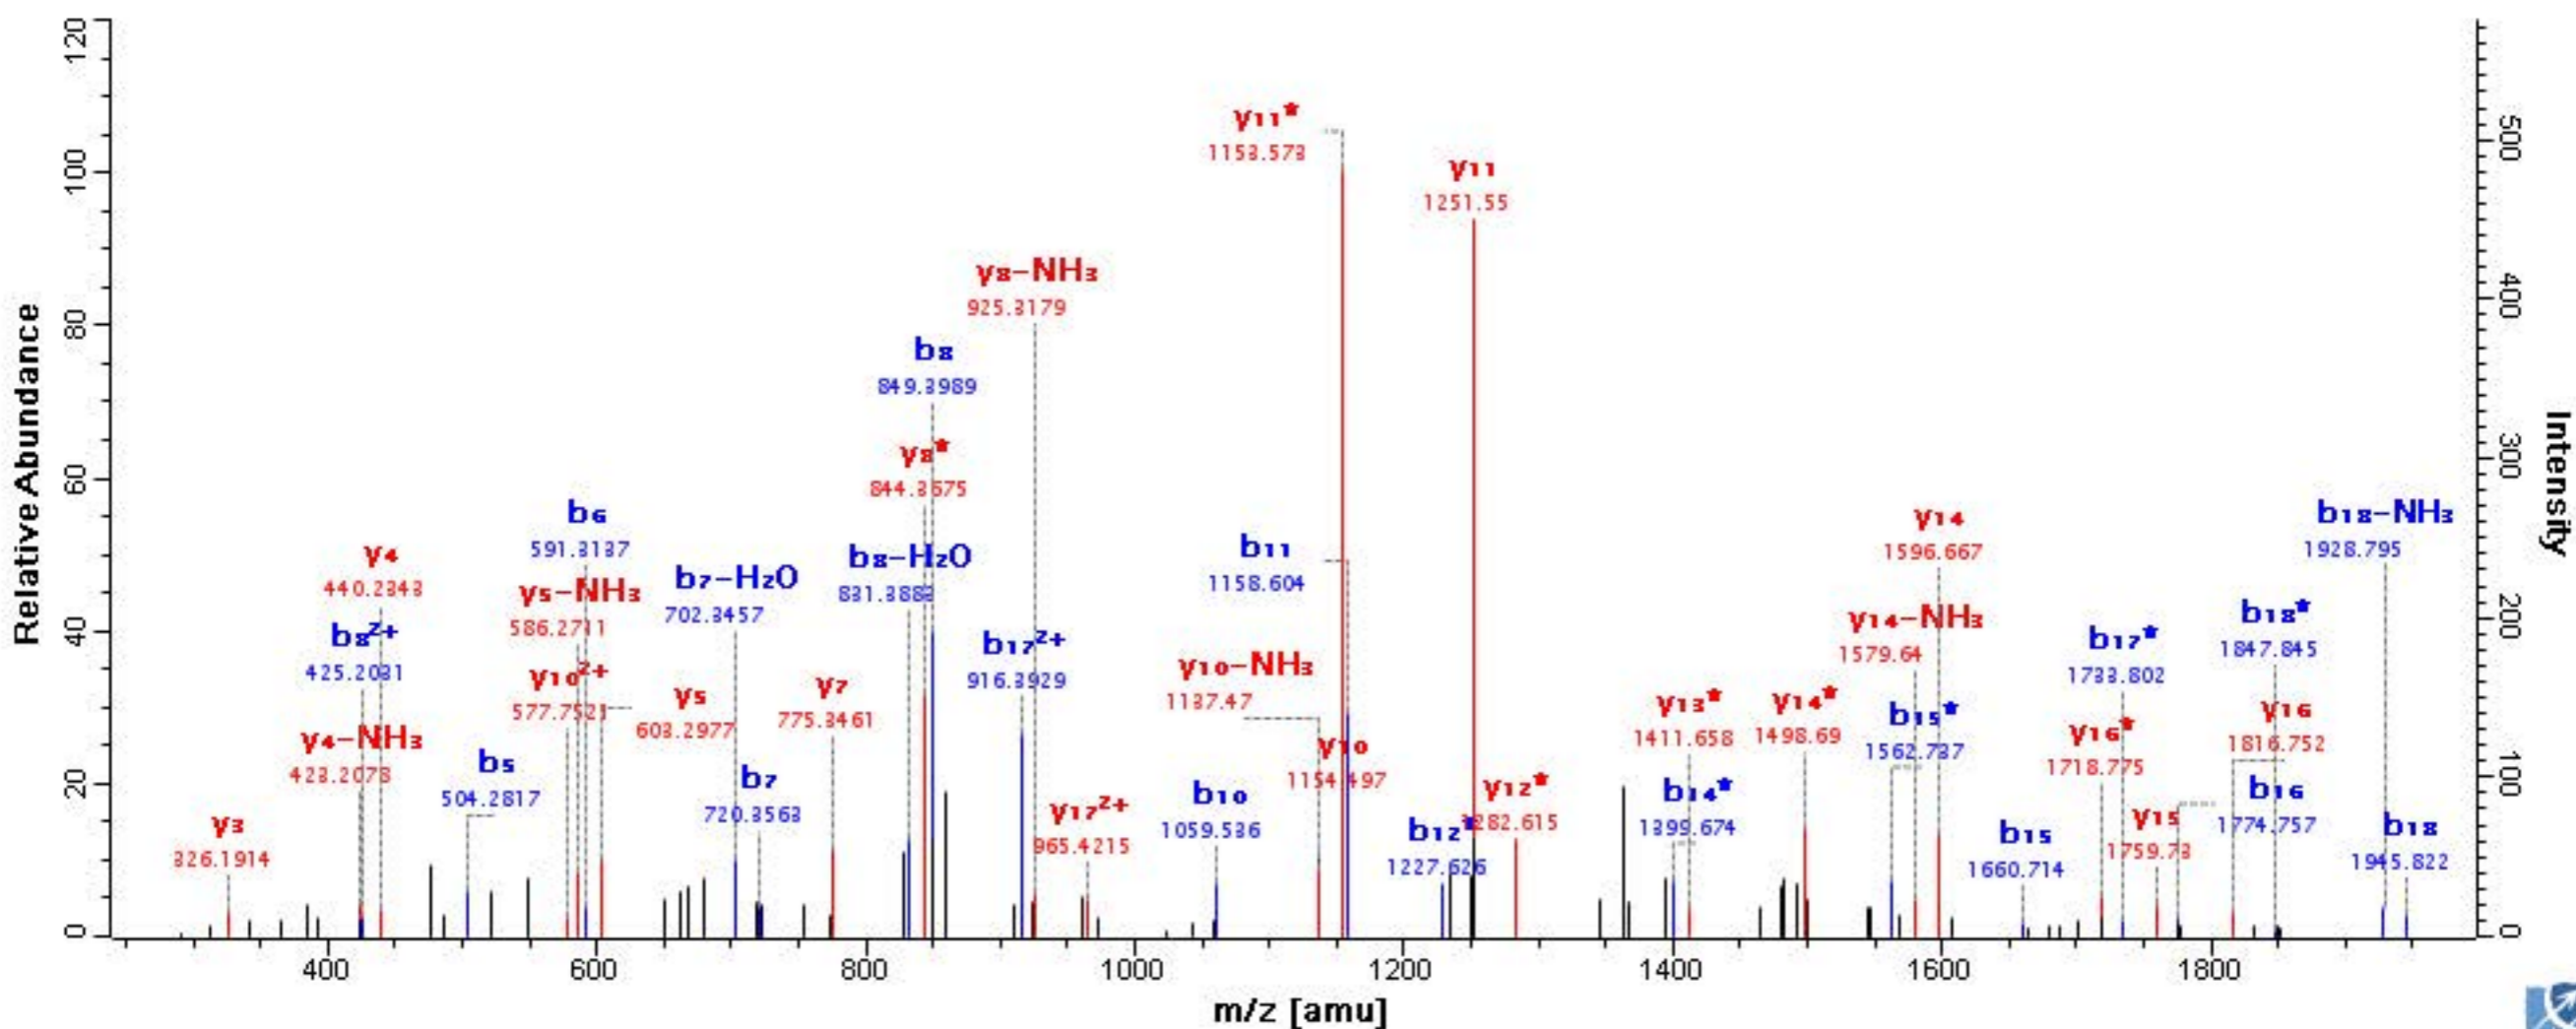

**precursor information**

|                   |                     |
|-------------------|---------------------|
| Mass:             | 2090.91984          |
| m/z:              | System.Collections. |
| Charge:           | System.Collections. |
| Retentiontime:    | System.Collections. |
| Score:            | 232.1485            |
| Mass Error [ppm]: | 0.030007            |
| PEP:              | 2.4486E-91          |
| Precursor Type:   | MULTI               |

| b <sup>2+</sup> ion |          | b ion     |          | seq |   | y ion    |          | y <sup>2+</sup> ion |          |
|---------------------|----------|-----------|----------|-----|---|----------|----------|---------------------|----------|
| Δ dalton            | mass     | Δ dalton  | mass     |     |   | Δ dalton | mass     | Δ dalton            | mass     |
|                     | 58.02874 |           | 58.02874 | 1   | G | 18       |          |                     |          |
|                     | 171.1128 |           | 171.1128 | 2   | I | 17       | 2042.92  |                     | 2042.92  |
|                     | 284.1969 |           | 284.1969 | 3   | I | 16       | 1929.836 |                     | 965.4215 |
|                     | 341.2183 |           | 341.2183 | 4   | G | 15       | 1816.752 | +0.148604           | 1816.752 |
|                     | 504.2817 | +0.041277 | 504.2817 | 5   | Y | 14       | 1759.73  | +0.482812           | 1759.73  |
|                     | 591.3137 | -0.265471 | 591.3137 | 6   | S | 13       | 1596.667 | +0.015135           | 1596.667 |
|                     | 720.3563 | +0.222026 | 720.3563 | 7   | E | 12       | 1509.635 |                     | 1509.635 |
| +0.071064           | 425.2031 | -0.02827  | 849.3989 | 8   | E | 11       | 1380.592 |                     | 1380.592 |
|                     | 946.4516 |           | 946.4516 | 9   | P | 10       | 1251.55  | -0.015966           | 1251.55  |
|                     | 1059.536 | +0.052676 | 1059.536 | 10  | I | 9        | 1154.497 | +0.10003            | 577.7521 |
|                     | 1158.604 | +0.007456 | 1158.604 | 11  | V | 8        | 1041.413 |                     | 1041.413 |
|                     | 1325.602 |           | 1325.602 | 12  | S | 7        | 942.3444 |                     | 942.3444 |
|                     | 1382.624 |           | 1382.624 | 13  | G | 6        | 775.3461 | +0.140576           | 775.3461 |
|                     | 1497.651 |           | 1497.651 | 14  | D | 5        | 718.3246 |                     | 718.3246 |
|                     | 1660.714 | +0.00637  | 1660.714 | 15  | Y | 4        | 603.2977 | -0.0341             | 603.2977 |
|                     | 1774.757 | -0.184751 | 1774.757 | 16  | N | 3        | 440.2343 | -0.080757           | 440.2343 |
| +0.029912           | 916.3929 |           | 1831.779 | 17  | G | 2        | 326.1914 | +0.161664           | 326.1914 |
|                     | 1945.822 | +0.154423 | 1945.822 | 18  | N | 1        | 269.1699 |                     | 269.1699 |
|                     |          |           |          | 19  | K | 0        | 155.127  |                     | 155.127  |

**general information**

|                       |             |
|-----------------------|-------------|
| Annotation:           | 16 of 19    |
| AminoAcids Coverag    | 84%         |
| Intensity Coverage:   | 65%         |
| Protein Localisation: | 271 ... 289 |

Source: 201 20530\_VR\_Bsu\_TripleSILAC\_pWTPrkCPrpC\_F1 9  
 Scannumber: 10687  
 Protein: BSU20420; yorD  
 Peptide Score: 103.88  
 Method: ITMS; CID; 3

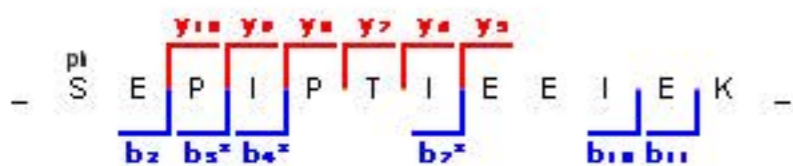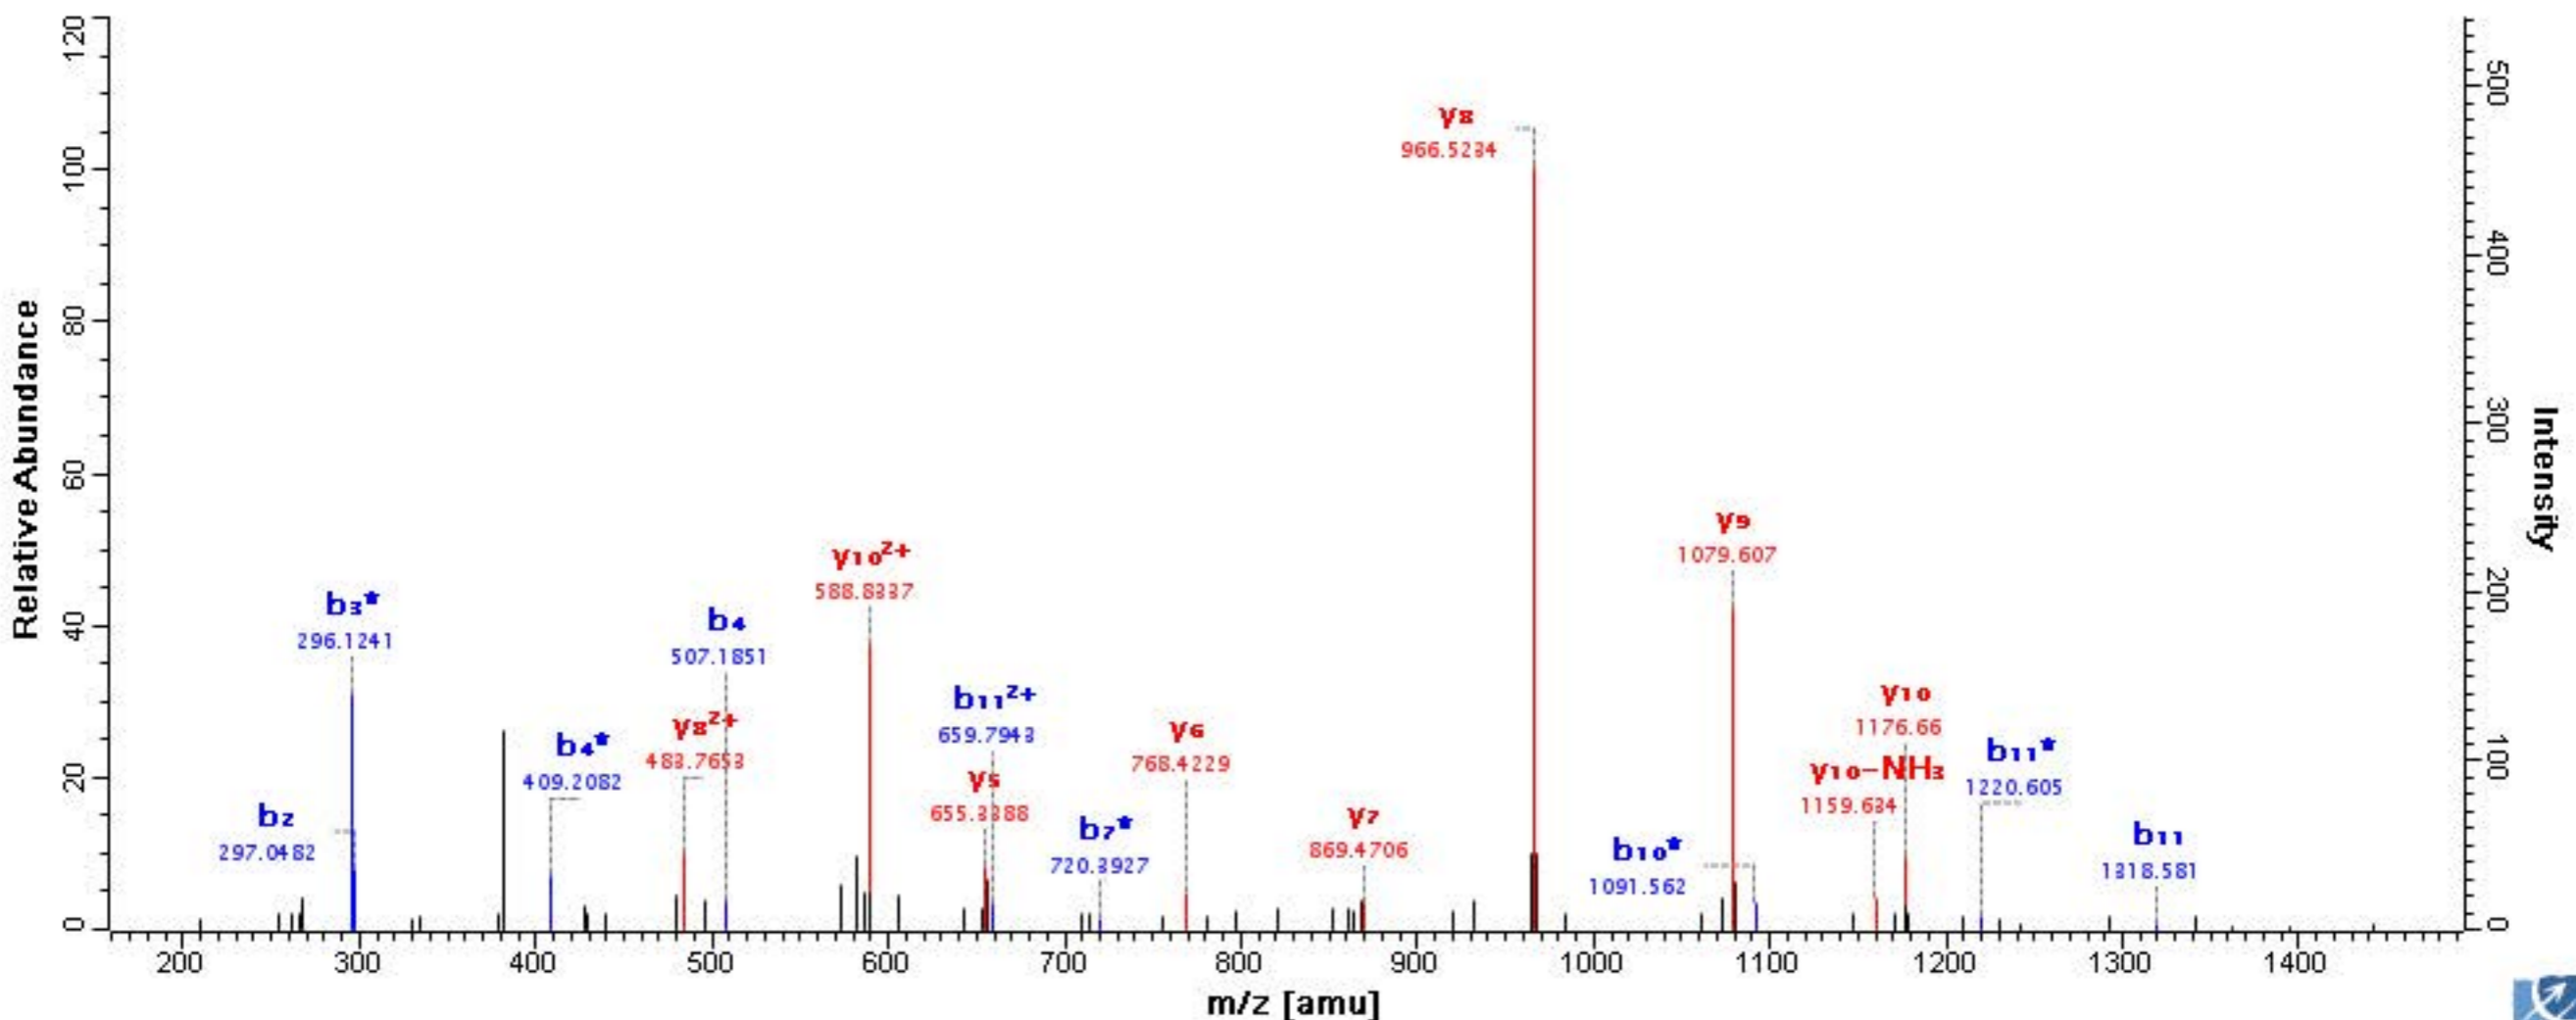

#### precursor information

|                   |                     |
|-------------------|---------------------|
| Mass:             | 1471.69417          |
| m/z:              | System.Collections. |
| Charge:           | System.Collections. |
| Retentiontime:    | System.Collections. |
| Score:            | 103.8804            |
| Mass Error [ppm]: | 0.21246             |
| PEP:              | 0.0094539           |
| Precursor Type:   | ISO                 |

#### general information

|                       |           |
|-----------------------|-----------|
| Annotation:           | 9 of 12   |
| AminoAcids Coverag    | 75 %      |
| Intensity Coverage:   | 60 %      |
| Protein Localisation: | 54 ... 65 |

| b <sup>2+</sup> ion |          | b ion     |          |     |   | γ ion    |          | γ <sup>2+</sup> ion |          |           |
|---------------------|----------|-----------|----------|-----|---|----------|----------|---------------------|----------|-----------|
| Δ dalton            | mass     | Δ dalton  | mass     | seq |   | Δ dalton | mass     | Δ dalton            | mass     |           |
|                     | 168.0056 |           | 168.0056 | 1   | S | 11       |          |                     |          |           |
|                     | 297.0482 | +0.20403  | 297.0482 | 2   | E | 10       | 1305.703 |                     | 1305.703 |           |
|                     | 394.101  |           | 394.101  | 3   | P | 9        | 1176.66  | -0.179956           | 588.8337 | +0.029614 |
|                     | 507.1851 | -0.022092 | 507.1851 | 4   | I | 8        | 1079.607 | -0.014399           | 1079.607 |           |
|                     | 604.2378 |           | 604.2378 | 5   | P | 7        | 966.5234 | +0.061303           | 483.7653 | -0.064204 |
|                     | 705.2855 |           | 705.2855 | 6   | T | 6        | 869.4706 | -0.093147           | 869.4706 |           |
|                     | 818.3696 |           | 818.3696 | 7   | I | 5        | 768.4229 | +0.035708           | 768.4229 |           |
|                     | 947.4122 |           | 947.4122 | 8   | E | 4        | 655.3388 | +0.001059           | 655.3388 |           |
|                     | 1076.455 |           | 1076.455 | 9   | E | 3        | 526.2963 |                     | 526.2963 |           |
|                     | 1189.539 |           | 1189.539 | 10  | I | 2        | 397.2537 |                     | 397.2537 |           |
| -0.372466           | 659.7943 | +0.38002  | 1318.581 | 11  | E | 1        | 284.1696 |                     | 284.1696 |           |
|                     |          |           |          | 12  | K | 0        | 155.127  |                     | 155.127  |           |

Source: 20120530\_VR\_Bsu\_TripleSILAC\_pWTPPrkCPrpC\_F19  
 Scannumber: 12404  
 Protein: BSU22880; jofD; ypfD  
 Peptide Score: 157.38  
 Method: ITMS; CID; 3

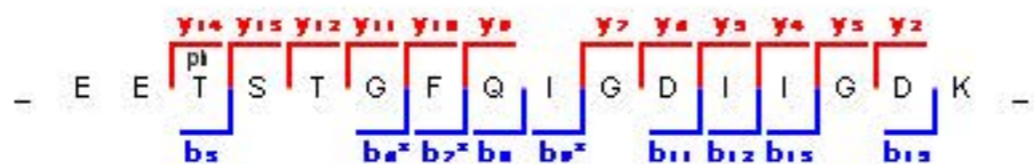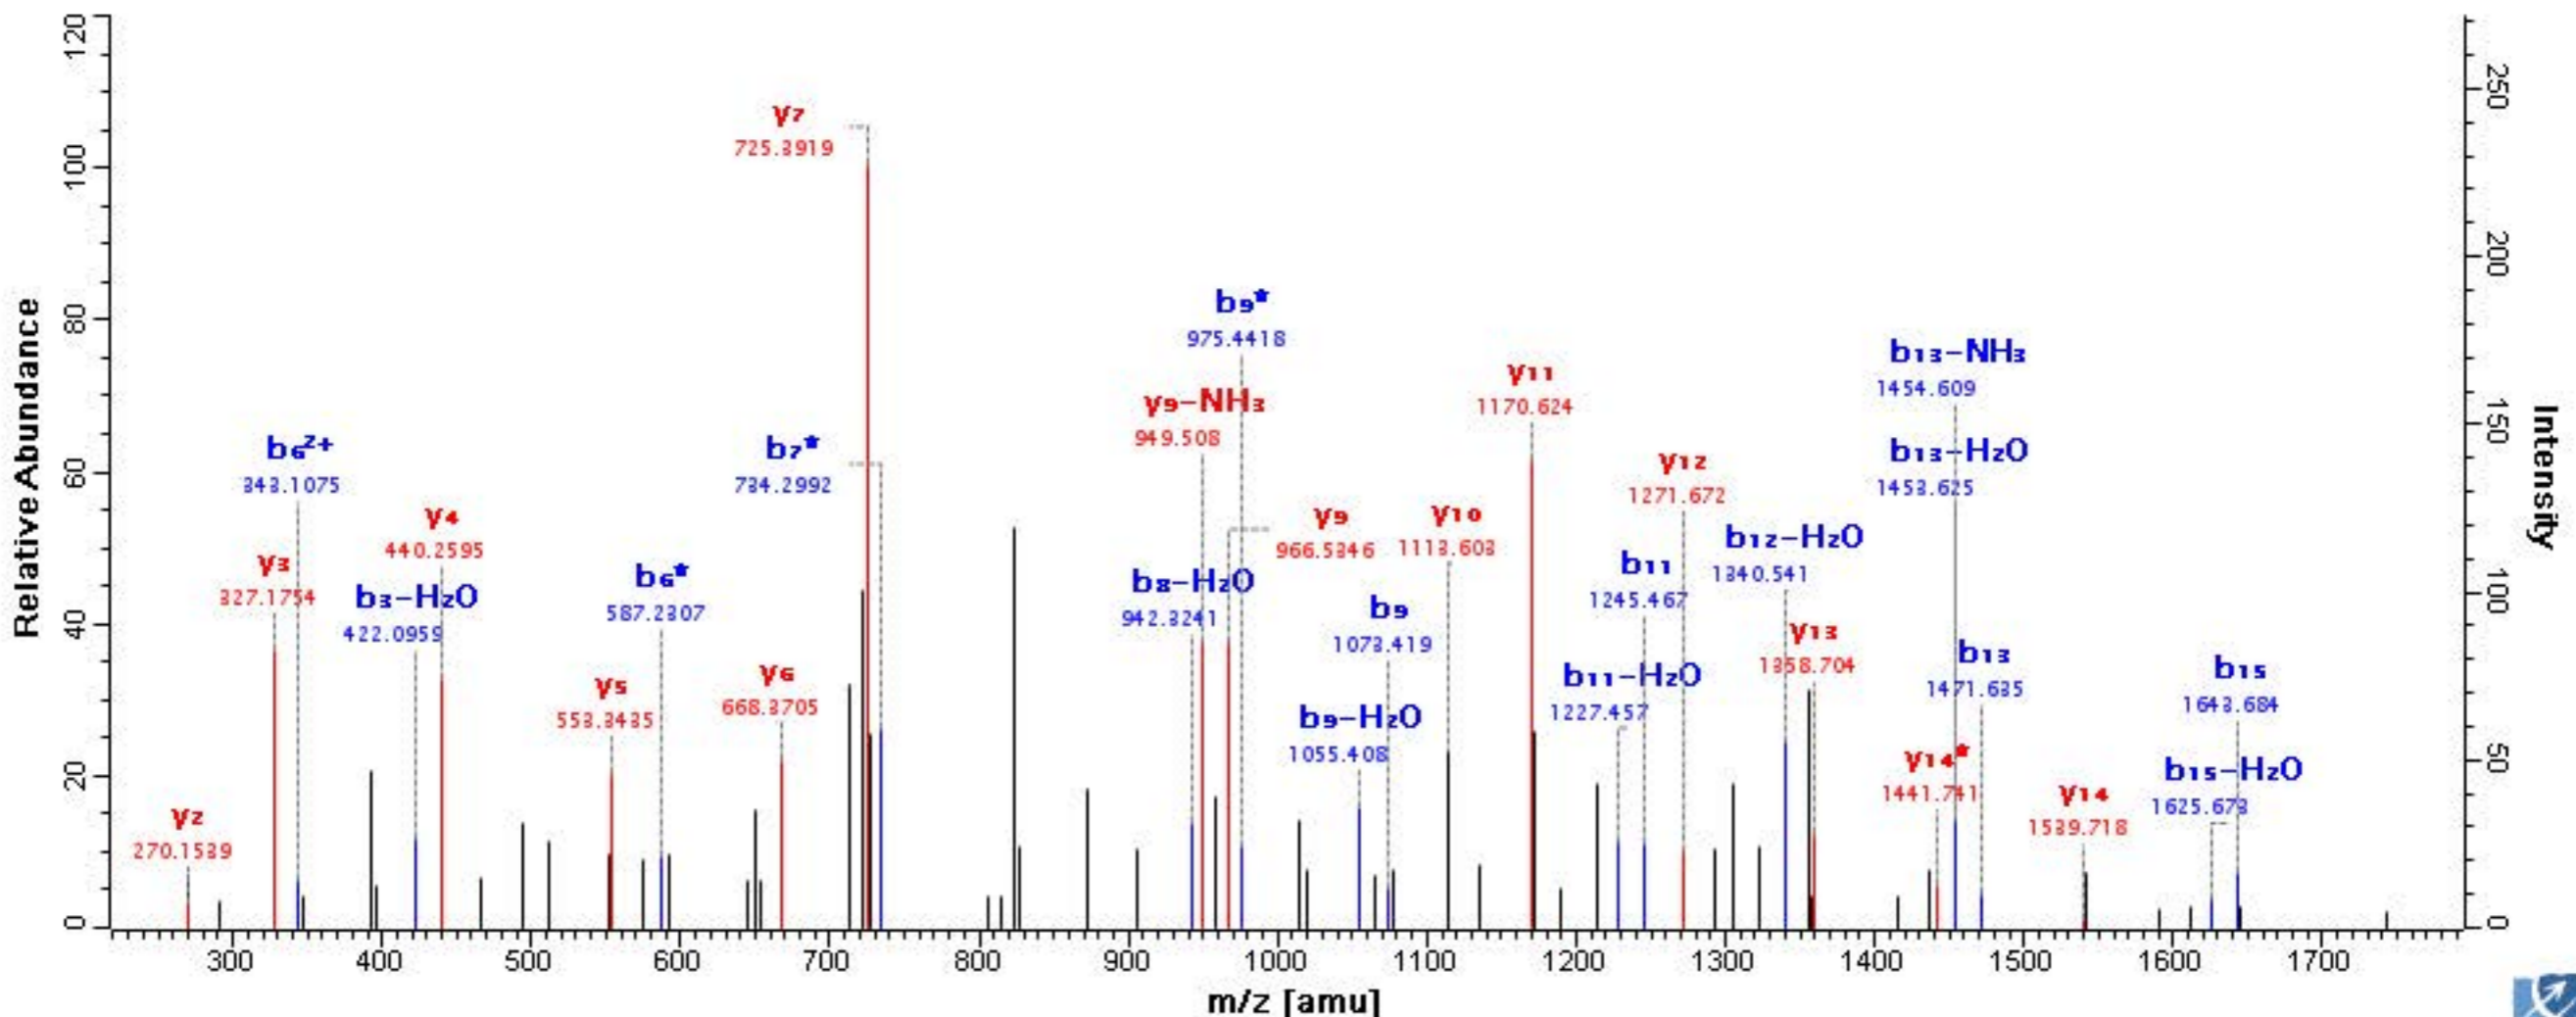

#### precursor information

|                   |                     |
|-------------------|---------------------|
| Mass:             | 1796.79649          |
| m/z:              | System.Collections. |
| Charge:           | System.Collections. |
| Retentiontime:    | System.Collections. |
| Score:            | 157.3835            |
| Mass Error [ppm]: | 0.22521             |
| PEP:              | 1.2374E-31          |
| Precursor Type:   | ISO                 |

#### general information

|                       |             |
|-----------------------|-------------|
| Annotation:           | 13 of 16    |
| AminoAcids Coverag    | 81 %        |
| Intensity Coverage:   | 48 %        |
| Protein Localisation: | 362 ... 377 |

| b <sup>2+</sup> ion |              | b ion      |              |    |     |    | y ion        |            |
|---------------------|--------------|------------|--------------|----|-----|----|--------------|------------|
| Δ dalton            | mass         | Δ dalton   | mass         |    | seq |    | Δ dalton     | mass       |
|                     | 130.04986956 |            | 130.04986956 | 1  | E   | 15 |              |            |
|                     | 259.09246266 |            | 259.09246266 | 2  | E   | 14 | 1668.7607725 |            |
|                     | 440.10647154 |            | 440.10647154 | 3  | T   | 13 | 1539.7181794 | +0.0558685 |
|                     | 527.13849995 |            | 527.13849995 | 4  | S   | 12 | 1358.7041705 | +0.3219526 |
|                     | 628.18617843 |            | 628.18617843 | 5  | T   | 11 | 1271.6721421 | -0.1948471 |
| -0.0724251          | 343.10745931 |            | 685.20764215 | 6  | G   | 10 | 1170.6244636 | +0.0271477 |
|                     | 832.27605607 |            | 832.27605607 | 7  | F   | 9  | 1113.6029999 | -0.0009491 |
|                     | 960.33463358 |            | 960.33463358 | 8  | Q   | 8  | 966.53458595 | +0.1482143 |
|                     | 1073.4186976 | -0.0646937 | 1073.4186976 | 9  | I   | 7  | 838.47600844 |            |
|                     | 1130.4401613 |            | 1130.4401613 | 10 | G   | 6  | 725.39194446 | -0.007423  |
|                     | 1245.4671043 | -0.0642723 | 1245.4671043 | 11 | D   | 5  | 668.37048073 | -0.0647556 |
|                     | 1358.5511683 |            | 1358.5511683 | 12 | I   | 4  | 553.3435377  | -0.0527662 |
|                     | 1471.6352323 | -0.1310819 | 1471.6352323 | 13 | I   | 3  | 440.25947372 | -0.0158214 |
|                     | 1528.656696  |            | 1528.656696  | 14 | G   | 2  | 327.17540974 | +0.0405937 |
|                     | 1643.683639  | +0.2438512 | 1643.683639  | 15 | D   | 1  | 270.15394602 | +0.0893401 |
|                     |              |            |              | 16 | K   | 0  | 155.12700298 |            |

Source: 20120530\_VR\_Bsu\_TripleSILAC\_pWTPPrkCPrpC\_F19  
 Scannumber: 12819  
 Protein: BSU30560; pckA; ppc  
 Peptide Score: 95.98  
 Method: ITMS; CID; 3

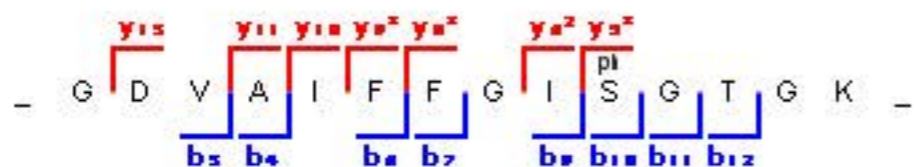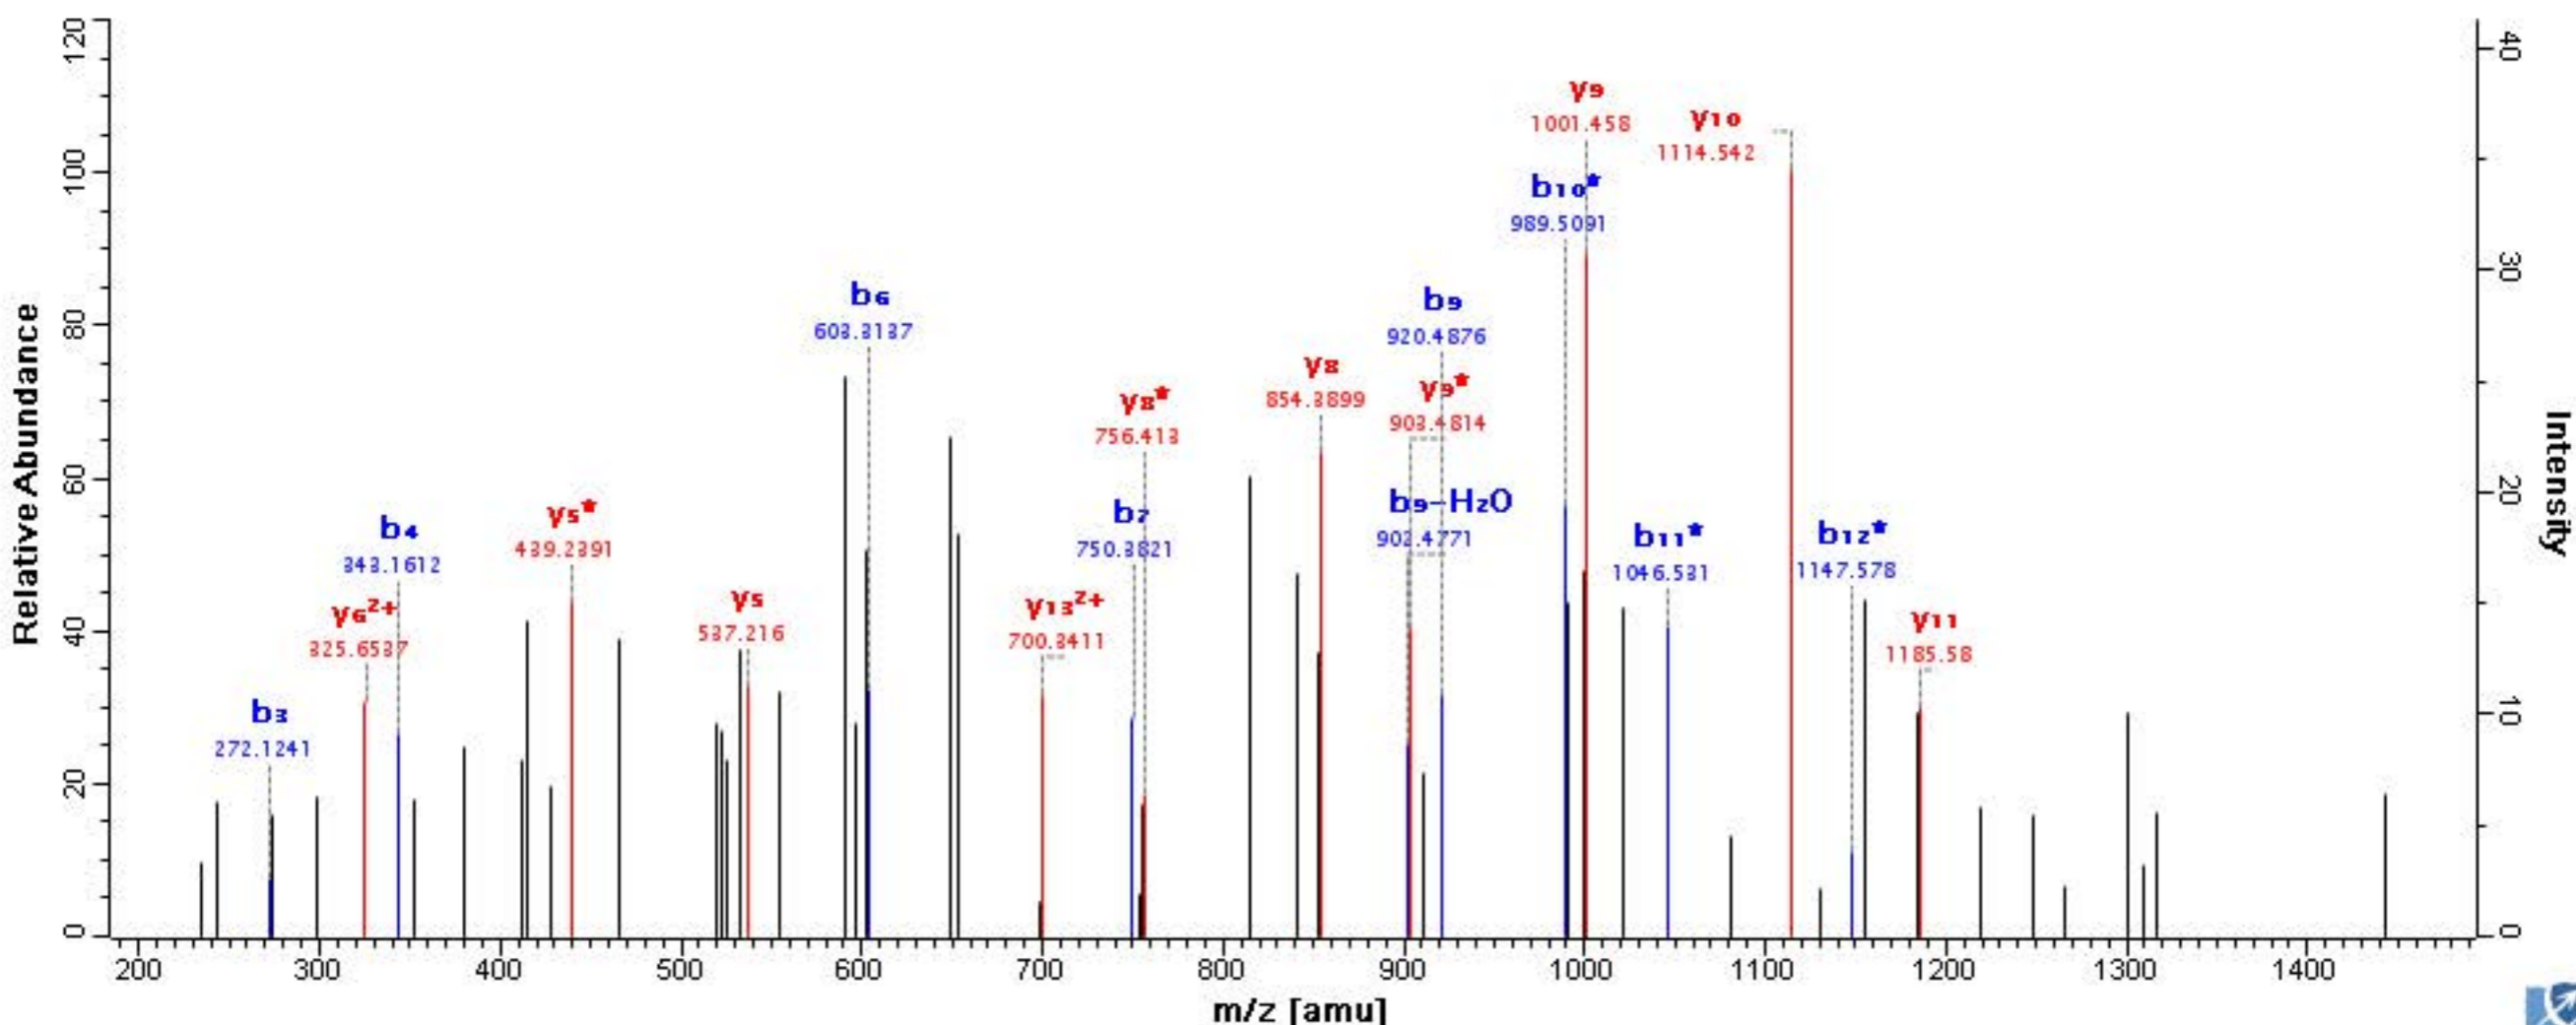

#### precursor information

|                   |                     |
|-------------------|---------------------|
| Mass:             | 1447.67569          |
| m/z:              | System.Collections. |
| Charge:           | System.Collections. |
| Retentiontime:    | System.Collections. |
| Score:            | 95.98126            |
| Mass Error [ppm]: | 0.57773             |
| PEP:              | 6.2944E-05          |
| Precursor Type:   | MULTI               |

#### general information

|                       |             |
|-----------------------|-------------|
| Annotation:           | 10 of 14    |
| AminoAcids Coverage:  | 71 %        |
| Intensity Coverage:   | 36 %        |
| Protein Localisation: | 226 ... 239 |

| b ion      |              |    |     |    | y ion        |            | y <sup>2+</sup> ion |            |
|------------|--------------|----|-----|----|--------------|------------|---------------------|------------|
| Δ dalton   | mass         |    | seq |    | Δ dalton     | mass       | Δ dalton            | mass       |
|            | 58.02874019  | 1  | G   | 13 |              |            |                     |            |
|            | 173.05568322 | 2  | D   | 12 | 1399.674858  |            | 700.34106722        | -0.0430936 |
| +0.1966121 | 272.12409714 | 3  | V   | 11 | 1284.6479149 |            | 1284.6479149        |            |
| +0.0521069 | 343.16121093 | 4  | A   | 10 | 1185.579501  | -0.14371   | 1185.579501         |            |
|            | 456.24527491 | 5  | I   | 9  | 1114.5423872 | +0.1761186 | 1114.5423872        |            |
| +0.0752272 | 603.31368882 | 6  | F   | 8  | 1001.4583233 | +0.0356343 | 1001.4583233        |            |
| -0.297447  | 750.38210274 | 7  | F   | 7  | 854.38990934 | +0.2393021 | 854.38990934        |            |
|            | 807.40356646 | 8  | G   | 6  | 707.32149543 |            | 707.32149543        |            |
| +0.1564125 | 920.48763044 | 9  | I   | 5  | 650.3000317  |            | 325.65365409        | -0.4840374 |
|            | 1087.4859893 | 10 | S   | 4  | 537.21596772 | +0.2167105 | 537.21596772        |            |
|            | 1144.507453  | 11 | G   | 3  | 370.21760891 |            | 370.21760891        |            |
|            | 1245.551315  | 12 | T   | 2  | 313.19614518 |            | 313.19614518        |            |
|            | 1302.5765952 | 13 | G   | 1  | 212.14846671 |            | 212.14846671        |            |
|            |              | 14 | K   | 0  | 155.12700298 |            | 155.12700298        |            |



Source: 201 20530\_VR\_Bsu\_TripleSILAC\_pWTPPrkCPrpC\_F1 9  
 Scannumber: 6930  
 Protein: BSU21490; yolF  
 Peptide Score: 65.35  
 Method: ITMS; CID; 3

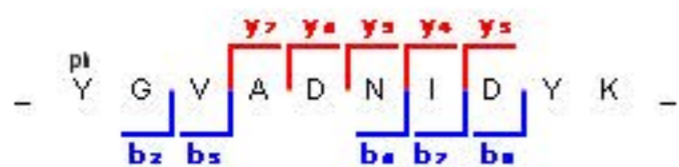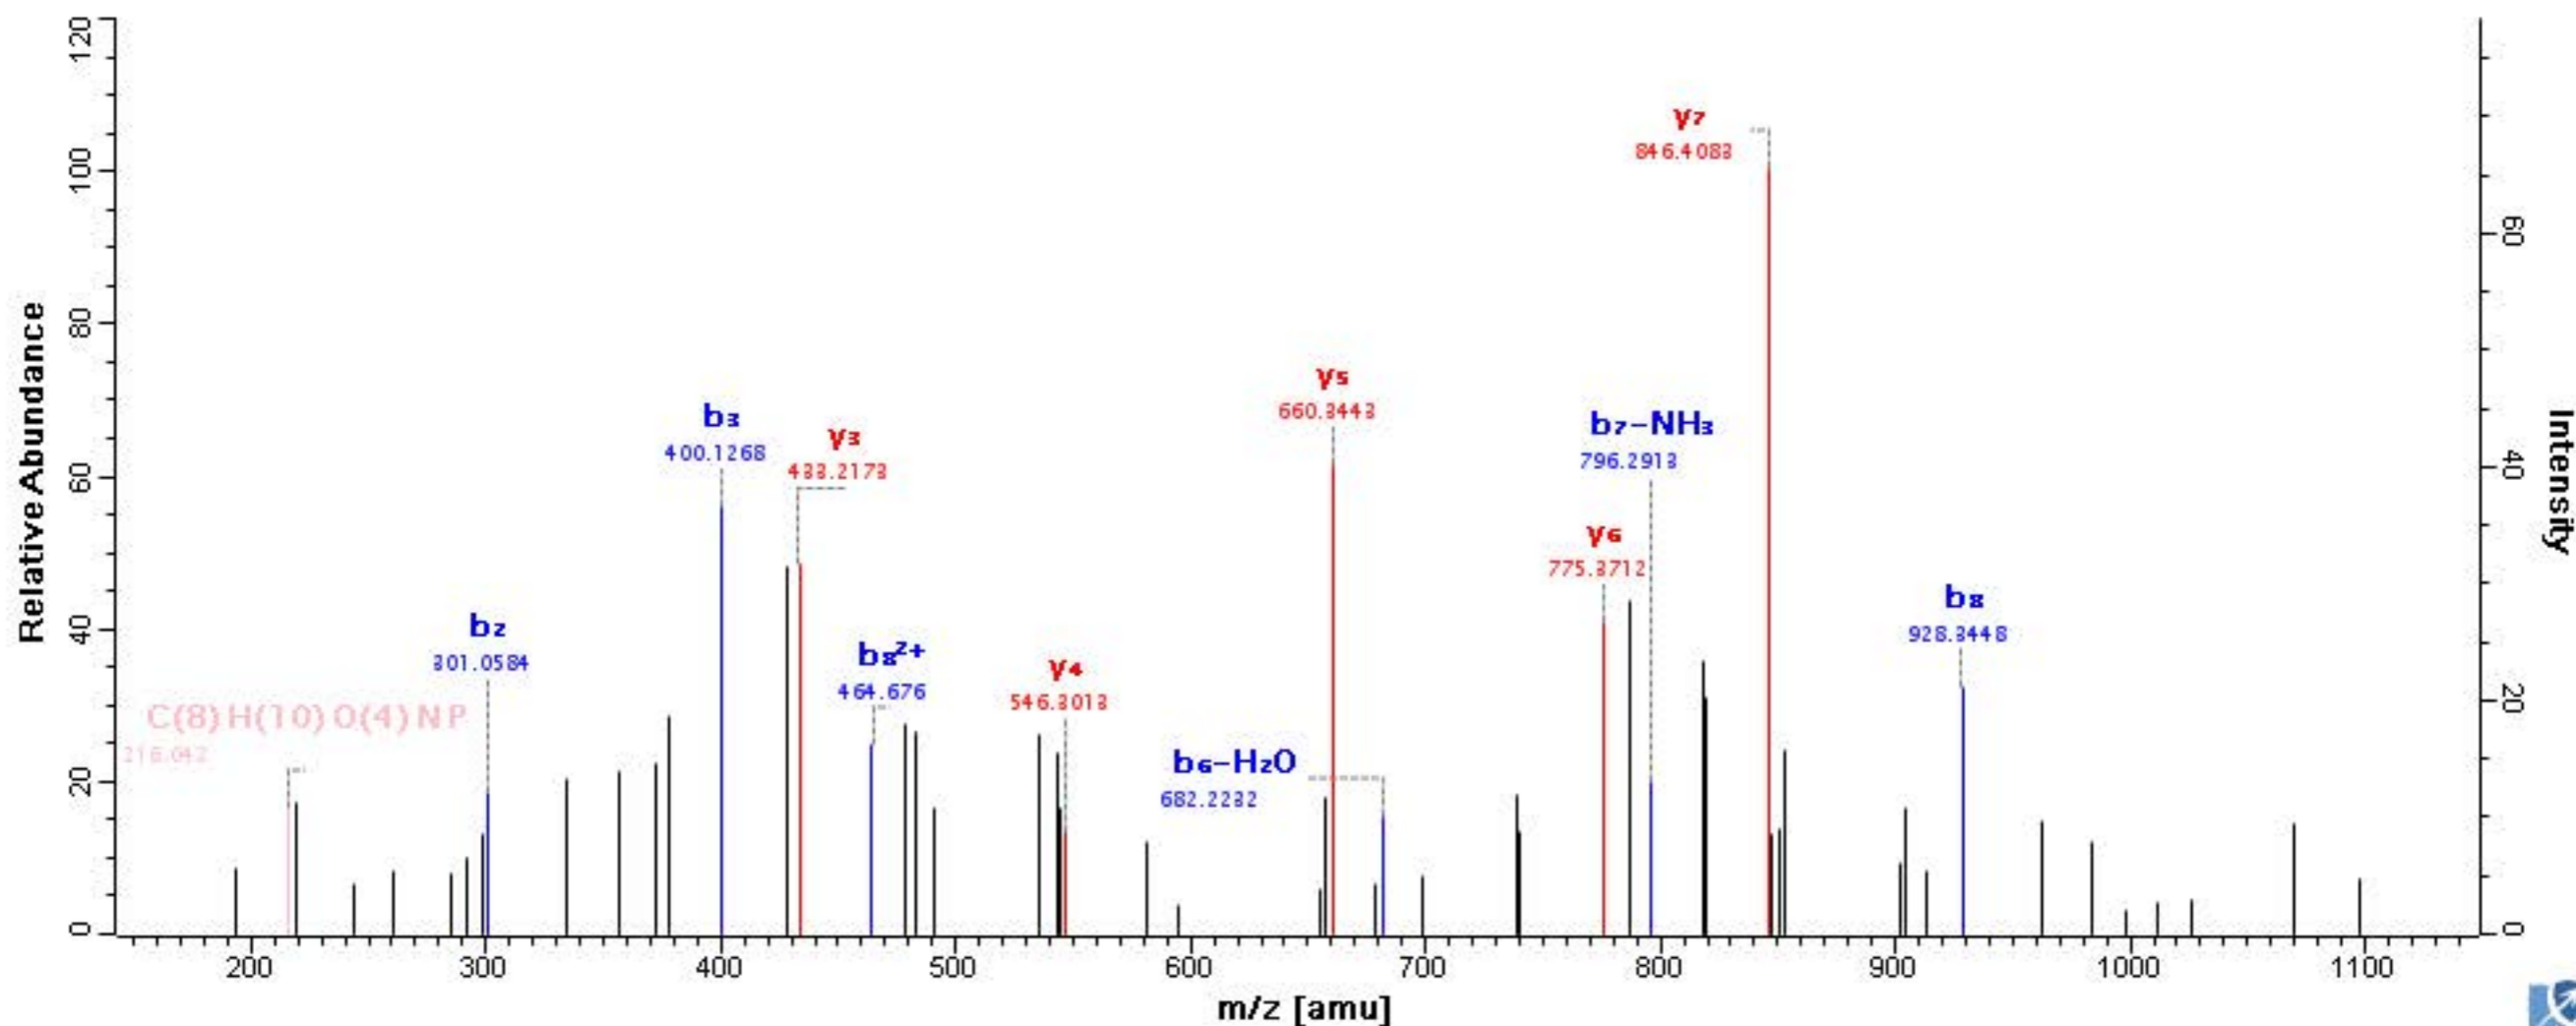

#### precursor information

|                   |                     |
|-------------------|---------------------|
| Mass:             | 1236.50644          |
| m/z:              | System.Collections. |
| Charge:           | System.Collections. |
| Retentiontime:    | System.Collections. |
| Score:            | 65.3469             |
| Mass Error [ppm]: | 0.043189            |
| PEP:              | 0.023346            |
| Precursor Type:   | MULTI               |

#### general information

|                       |           |
|-----------------------|-----------|
| Annotation:           | 8 of 10   |
| AminoAcids Coverage:  | 80 %      |
| Intensity Coverage:   | 39 %      |
| Protein Localisation: | 57 ... 66 |

| b <sup>2+</sup> ion |              | b ion      |              |     | y ion    |      |              |            |
|---------------------|--------------|------------|--------------|-----|----------|------|--------------|------------|
| Δ dalton            | mass         | Δ dalton   | mass         | seq | Δ dalton | mass |              |            |
|                     | 244.03693541 |            | 244.03693541 | 1   |          |      |              |            |
|                     | 301.05839914 | +0.0135308 | 301.05839914 | 2   | G        | 8    | 1002.4982004 |            |
|                     | 400.12681305 | -0.0830508 | 400.12681305 | 3   | V        | 7    | 945.47673672 |            |
|                     | 471.16392684 |            | 471.16392684 | 4   | A        | 6    | 846.4083228  | -0.0855689 |
|                     | 586.19086987 |            | 586.19086987 | 5   | D        | 5    | 775.37120901 | -0.0389947 |
|                     | 700.23379732 |            | 700.23379732 | 6   | N        | 4    | 660.34426598 | +0.1984586 |
|                     | 813.3178613  |            | 813.3178613  | 7   | I        | 3    | 546.30133853 | +0.0751263 |
| -0.4135282          | 464.6760404  | +0.0538773 | 928.34480433 | 8   | D        | 2    | 433.21727455 | +0.2398788 |
|                     | 1091.4081329 |            | 1091.4081329 | 9   | Y        | 1    | 318.19033152 |            |
|                     |              |            |              | 10  | K        | 0    | 155.12700298 |            |

Source: 201 20530\_VR\_Bsu\_TripleSILAC\_pWTPPrkCPrpC\_F1 9  
 Scannumber: 7421  
 Protein: BSU04400; gsiB  
 Peptide Score: 129.85  
 Method: ITMS; CID; 3

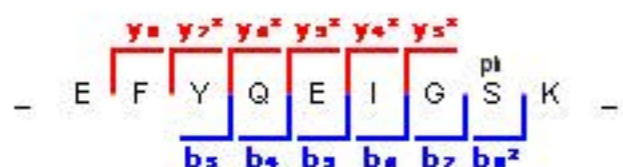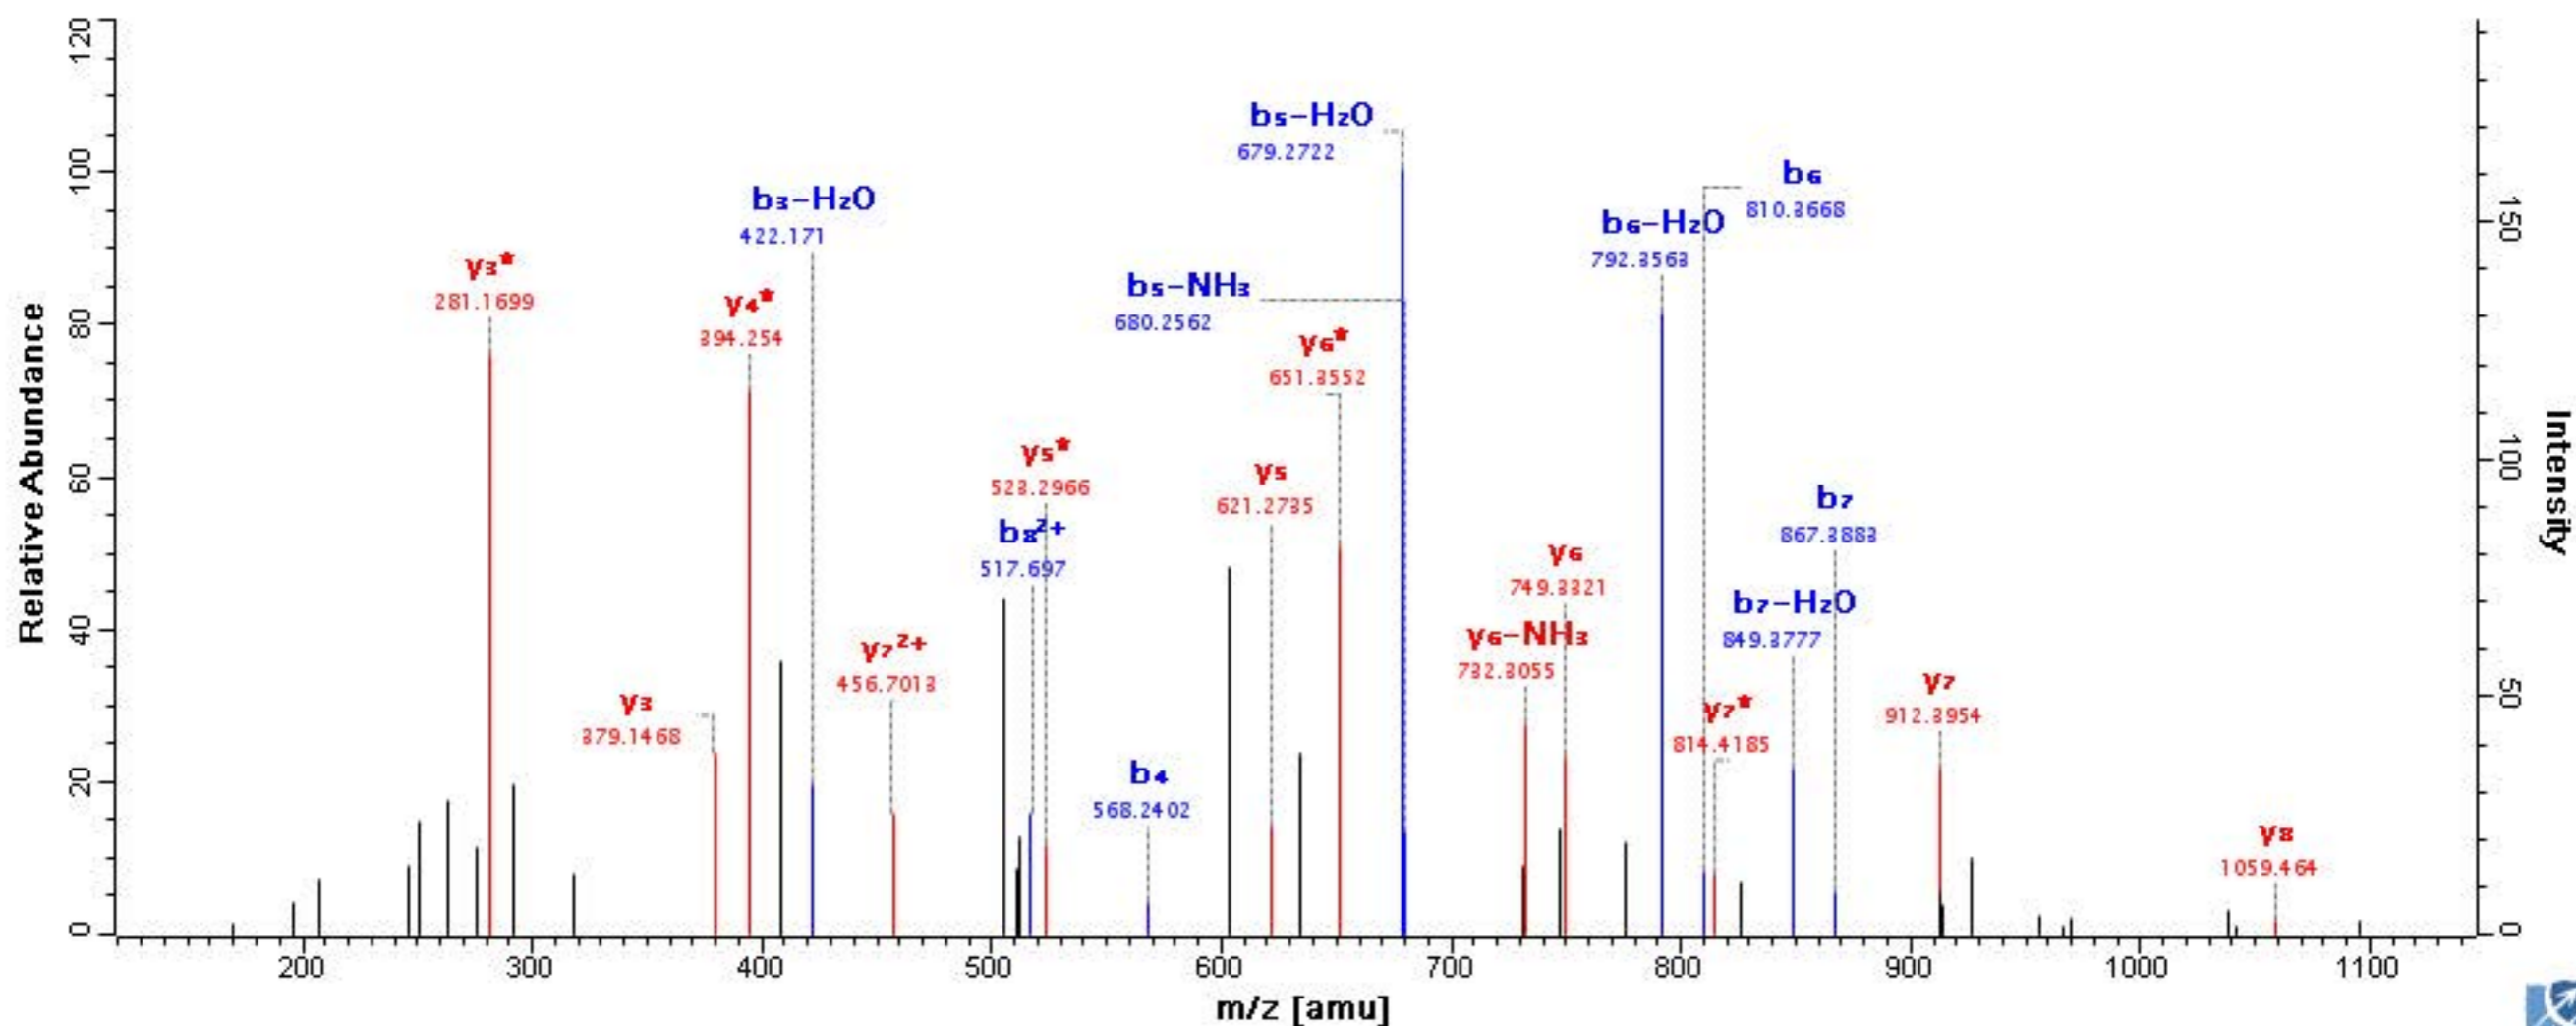

**precursor information**

|                          |                     |
|--------------------------|---------------------|
| Mass:                    | 1179.48459          |
| m/z:                     | System.Collections. |
| Charge:                  | System.Collections. |
| Retentiontime:           | System.Collections. |
| Score:                   | 129.8513            |
| Mass Error [ppm]:        | -0.27535            |
| PEP:                     | 7.5472E-07          |
| <b>g</b> Precursor Type: | MULTI               |
| Annotation:              | 7 of 9              |
| AminoAcids Coverag       | 78 %                |
| Intensity Coverage:      | 64 %                |
| Protein Localisation:    | 107 ... 115         |

| b <sup>2+</sup> ion |          | b ion     |          |     | y ion |          | y <sup>2+</sup> ion |           |          |           |
|---------------------|----------|-----------|----------|-----|-------|----------|---------------------|-----------|----------|-----------|
| Δ dalton            | mass     | Δ dalton  | mass     | seq |       | Δ dalton | mass                | Δ dalton  | mass     |           |
|                     | 130.0499 |           | 130.0499 | 1   | E     | 8        |                     |           |          |           |
|                     | 277.1183 |           | 277.1183 | 2   | F     | 7        | 1059.464            | -0.059017 | 1059.464 |           |
|                     | 440.1816 |           | 440.1816 | 3   | Y     | 6        | 912.3954            | +0.046445 | 456.7013 | +0.185325 |
|                     | 568.2402 | +0.039168 | 568.2402 | 4   | Q     | 5        | 749.3321            | +0.161531 | 749.3321 |           |
|                     | 697.2828 |           | 697.2828 | 5   | E     | 4        | 621.2735            | +0.05214  | 621.2735 |           |
|                     | 810.3668 | -0.06576  | 810.3668 | 6   | I     | 3        | 492.2309            |           | 492.2309 |           |
|                     | 867.3883 | +0.189571 | 867.3883 | 7   | G     | 2        | 379.1468            | +0.240809 | 379.1468 |           |
| -0.387036           | 517.697  |           | 1034.387 | 8   | S     | 1        | 322.1254            |           | 322.1254 |           |
|                     |          |           |          | 9   | K     | 0        | 155.127             |           | 155.127  |           |

Source: 201 20530\_VR\_Bsu\_TripleSILAC\_pWTPPrkCPrpC\_F19  
 Scannumber: 8196  
 Protein: BSU28230; tig: yzzH  
 Peptide Score: 98.68  
 Method: ITMS; CID; 3

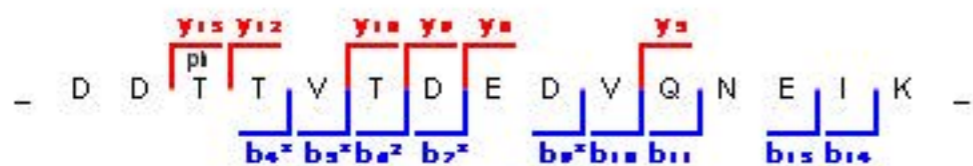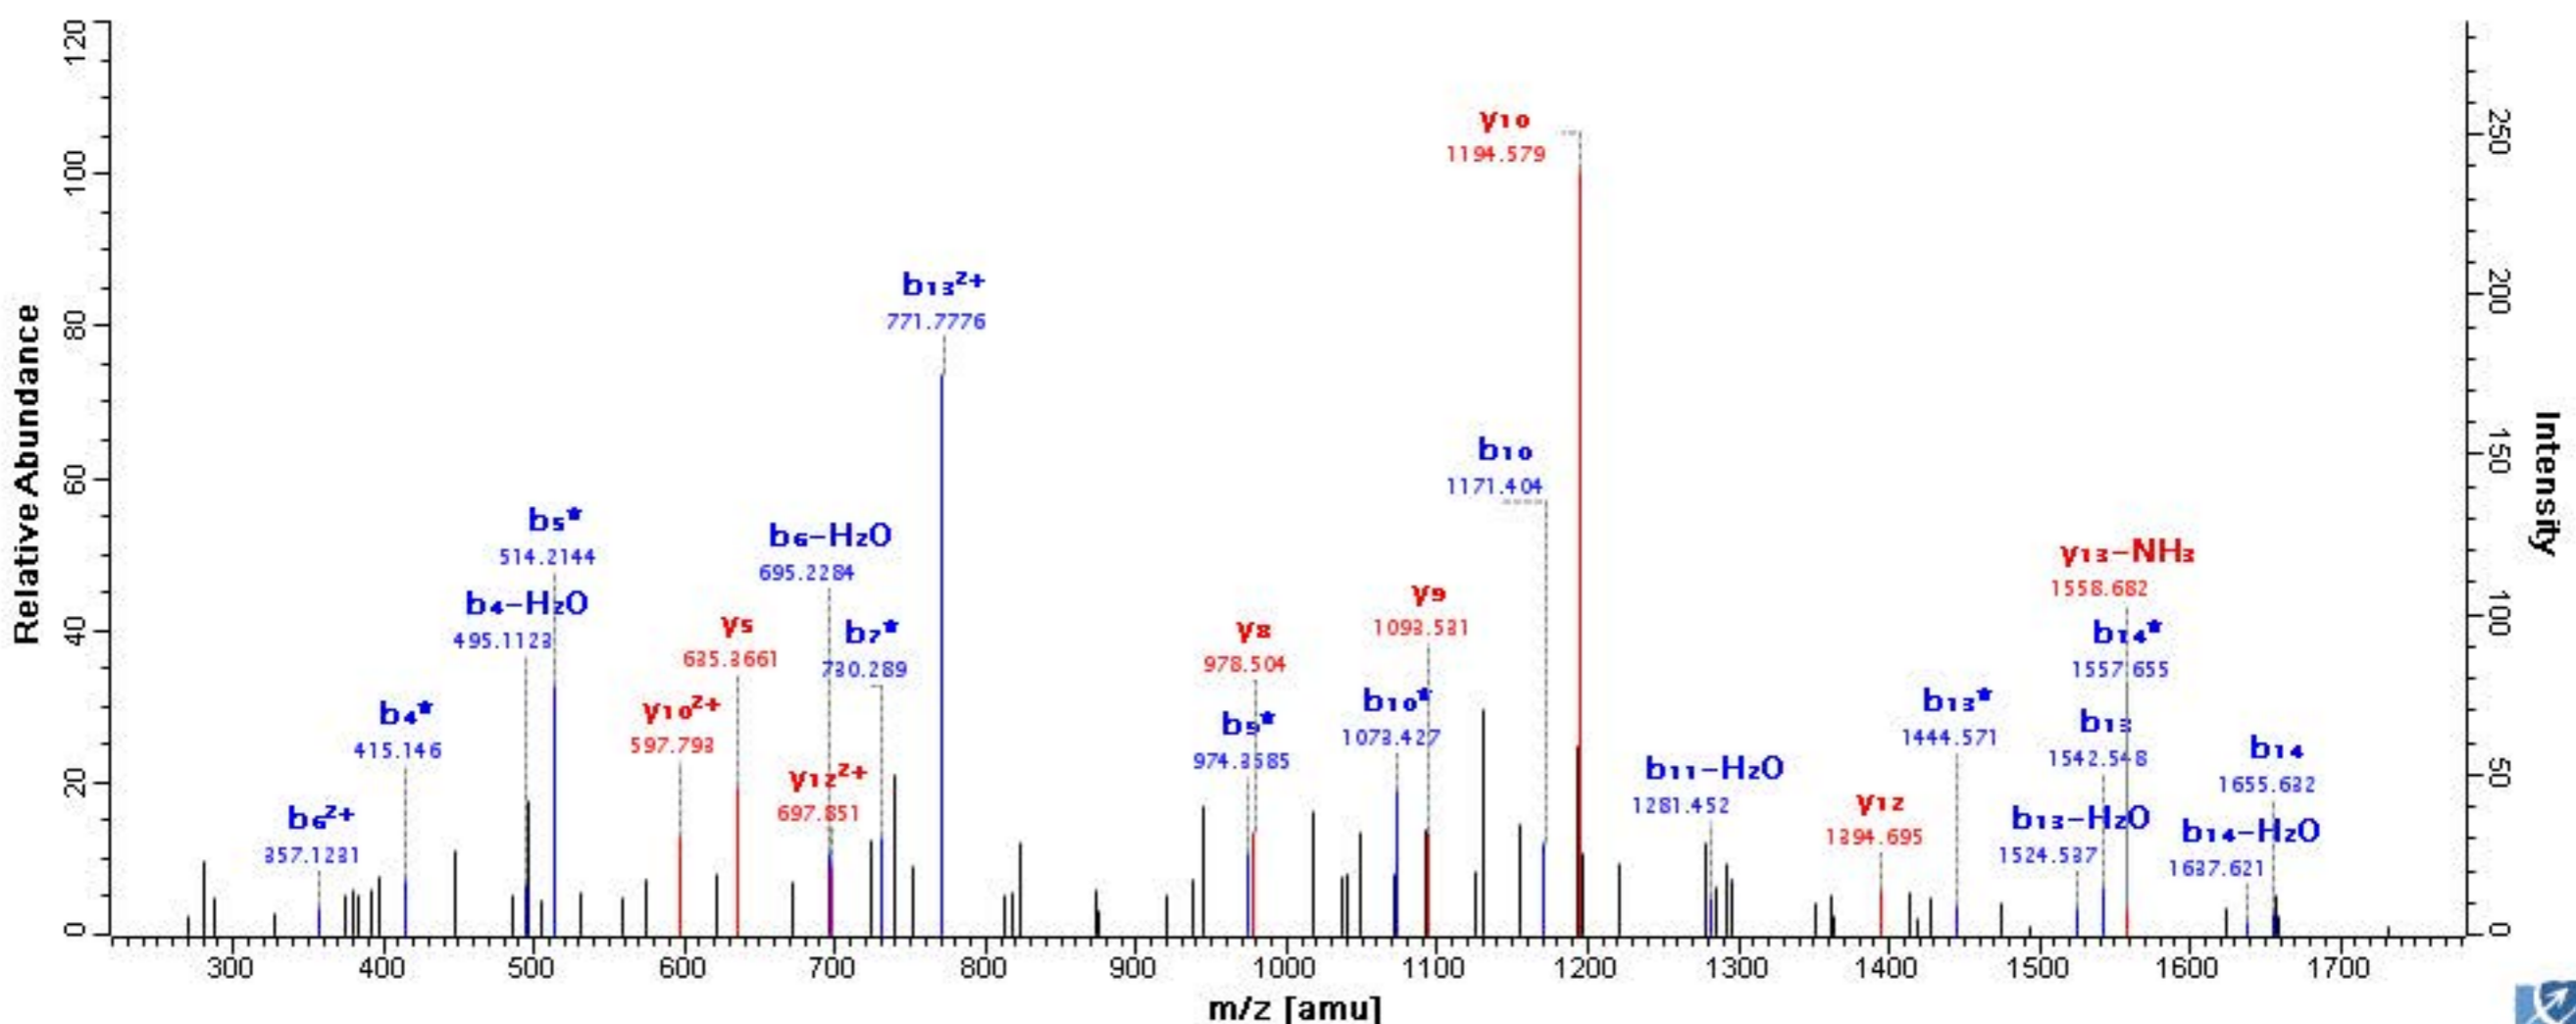

#### precursor information

|                   |                     |
|-------------------|---------------------|
| Mass:             | 1800.73088          |
| m/z:              | System.Collections. |
| Charge:           | System.Collections. |
| Retentiontime:    | System.Collections. |
| Score:            | 98.67624            |
| Mass Error [ppm]: | 0.35205             |
| PEP:              | 2.4459E-06          |
| Precursor Type:   | MULTI               |

#### general information

|                       |             |
|-----------------------|-------------|
| Annotation:           | 11 of 15    |
| AminoAcids Coverag    | 73 %        |
| Intensity Coverage:   | 44 %        |
| Protein Localisation: | 129 ... 143 |

| b <sup>2+</sup> ion |          | b ion     |          |     | y ion |          | y <sup>2+</sup> ion |           |          |           |
|---------------------|----------|-----------|----------|-----|-------|----------|---------------------|-----------|----------|-----------|
| Δ dalton            | mass     | Δ dalton  | mass     | seq |       | Δ dalton | mass                | Δ dalton  | mass     |           |
|                     | 116.0342 |           | 116.0342 | 1   | D     | 14       |                     |           |          |           |
|                     | 231.0612 |           | 231.0612 | 2   | D     | 13       | 1690.736            |           | 1690.736 |           |
|                     | 412.0752 |           | 412.0752 | 3   | T     | 12       | 1575.709            |           | 1575.709 |           |
|                     | 513.1228 |           | 513.1228 | 4   | T     | 11       | 1394.695            | +0.080165 | 697.851  | +0.208808 |
|                     | 612.1913 |           | 612.1913 | 5   | V     | 10       | 1293.647            |           | 1293.647 |           |
| -0.010683           | 357.1231 |           | 713.2389 | 6   | T     | 9        | 1194.579            | -0.029328 | 597.793  | -0.387382 |
|                     | 828.2659 |           | 828.2659 | 7   | D     | 8        | 1093.531            | +0.11796  | 1093.531 |           |
|                     | 957.3085 |           | 957.3085 | 8   | E     | 7        | 978.504             | -0.077815 | 978.504  |           |
|                     | 1072.335 |           | 1072.335 | 9   | D     | 6        | 849.4614            |           | 849.4614 |           |
|                     | 1171.404 | -0.023464 | 1171.404 | 10  | V     | 5        | 734.4345            |           | 734.4345 |           |
|                     | 1299.462 |           | 1299.462 | 11  | Q     | 4        | 635.3661            | +0.13118  | 635.3661 |           |
|                     | 1413.505 |           | 1413.505 | 12  | N     | 3        | 507.3075            |           | 507.3075 |           |
| -0.363176           | 771.7776 | -0.024862 | 1542.548 | 13  | E     | 2        | 393.2646            |           | 393.2646 |           |
|                     | 1655.632 | +0.170127 | 1655.632 | 14  | I     | 1        | 264.222             |           | 264.222  |           |
|                     |          |           |          | 15  | K     | 0        | 151.1379            |           | 151.1379 |           |

Source: 20120530\_VR\_Bsu\_TripleSILAC\_pWTPPrkCPrpC\_F19  
 Scannumber: 8424  
 Protein: BSU37500; speE; ywhF  
 Peptide Score: 135.79  
 Method: ITMS; CID; 3

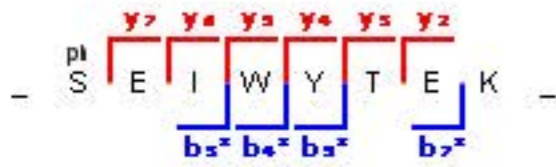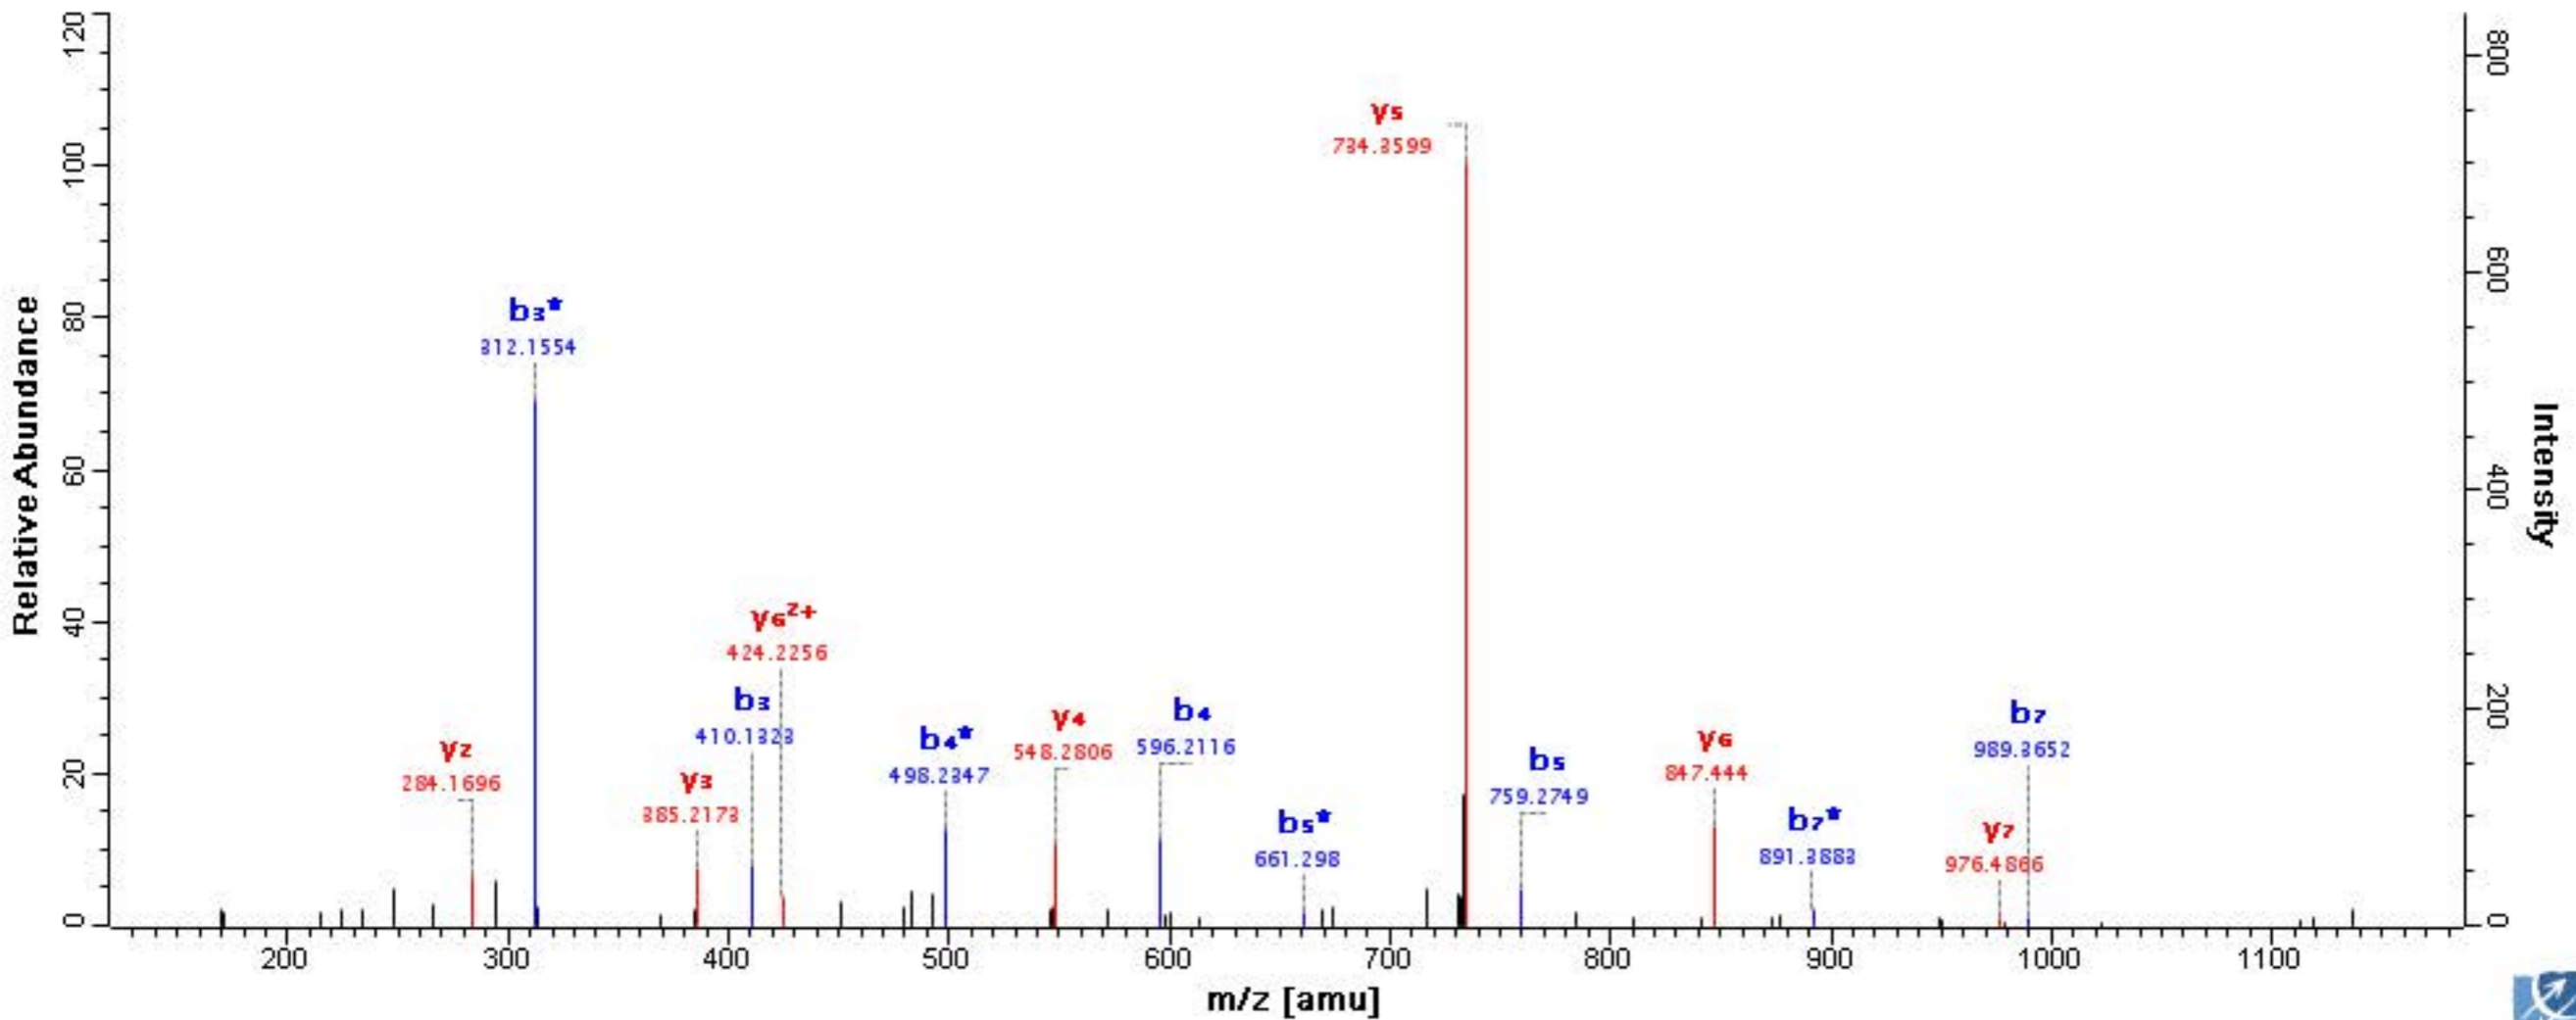

**precursor information**

|                       |                     |
|-----------------------|---------------------|
| Mass:                 | 1134.46277          |
| m/z:                  | System.Collections. |
| Charge:               | System.Collections. |
| Retentiontime:        | System.Collections. |
| Score:                | 135.7909            |
| Mass Error [ppm]:     | -0.59924            |
| g PEP:                | 1.3946E-06          |
| Annotation:           | 6 of 8              |
| AminoAcids Coverage:  | 75 %                |
| Intensity Coverage:   | 72 %                |
| Protein Localisation: | 2 ... 9             |

| b ion           |              |   |     |   | $\gamma$ ion    |            | $\gamma^{2+}$ ion |            |
|-----------------|--------------|---|-----|---|-----------------|------------|-------------------|------------|
| $\Delta$ dalton | mass         |   | seq |   | $\Delta$ dalton | mass       | $\Delta$ dalton   | mass       |
|                 | 168.00563528 | 1 | S   | 7 |                 |            |                   |            |
|                 | 297.04822838 | 2 | E   | 6 | 976.48657312    | +0.0868522 | 976.48657312      |            |
| +0.0173048      | 410.13229236 | 3 | I   | 5 | 847.44398003    | -0.0556133 | 424.22562825      | +0.1477848 |
| -0.0568812      | 596.21160532 | 4 | W   | 4 | 734.35991605    | +0.1133506 | 734.35991605      |            |
| -0.3743601      | 759.27493385 | 5 | Y   | 3 | 548.28060309    | +0.0938476 | 548.28060309      |            |
|                 | 860.32261233 | 6 | T   | 2 | 385.21727455    | -0.011403  | 385.21727455      |            |
| +0.1817306      | 989.36520542 | 7 | E   | 1 | 284.16959608    | -0.3014931 | 284.16959608      |            |
|                 |              | 8 | K   | 0 | 155.12700298    |            | 155.12700298      |            |

Source: 20120530\_VR\_Bsu\_TripleSILAC\_pWTPPrkCPrpC\_F19  
 Scannumber: 9368  
 Protein: BSU13900; ptsH  
 Peptide Score: 194.12  
 Method: ITMS; CID; 3

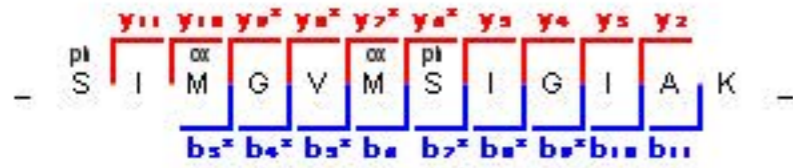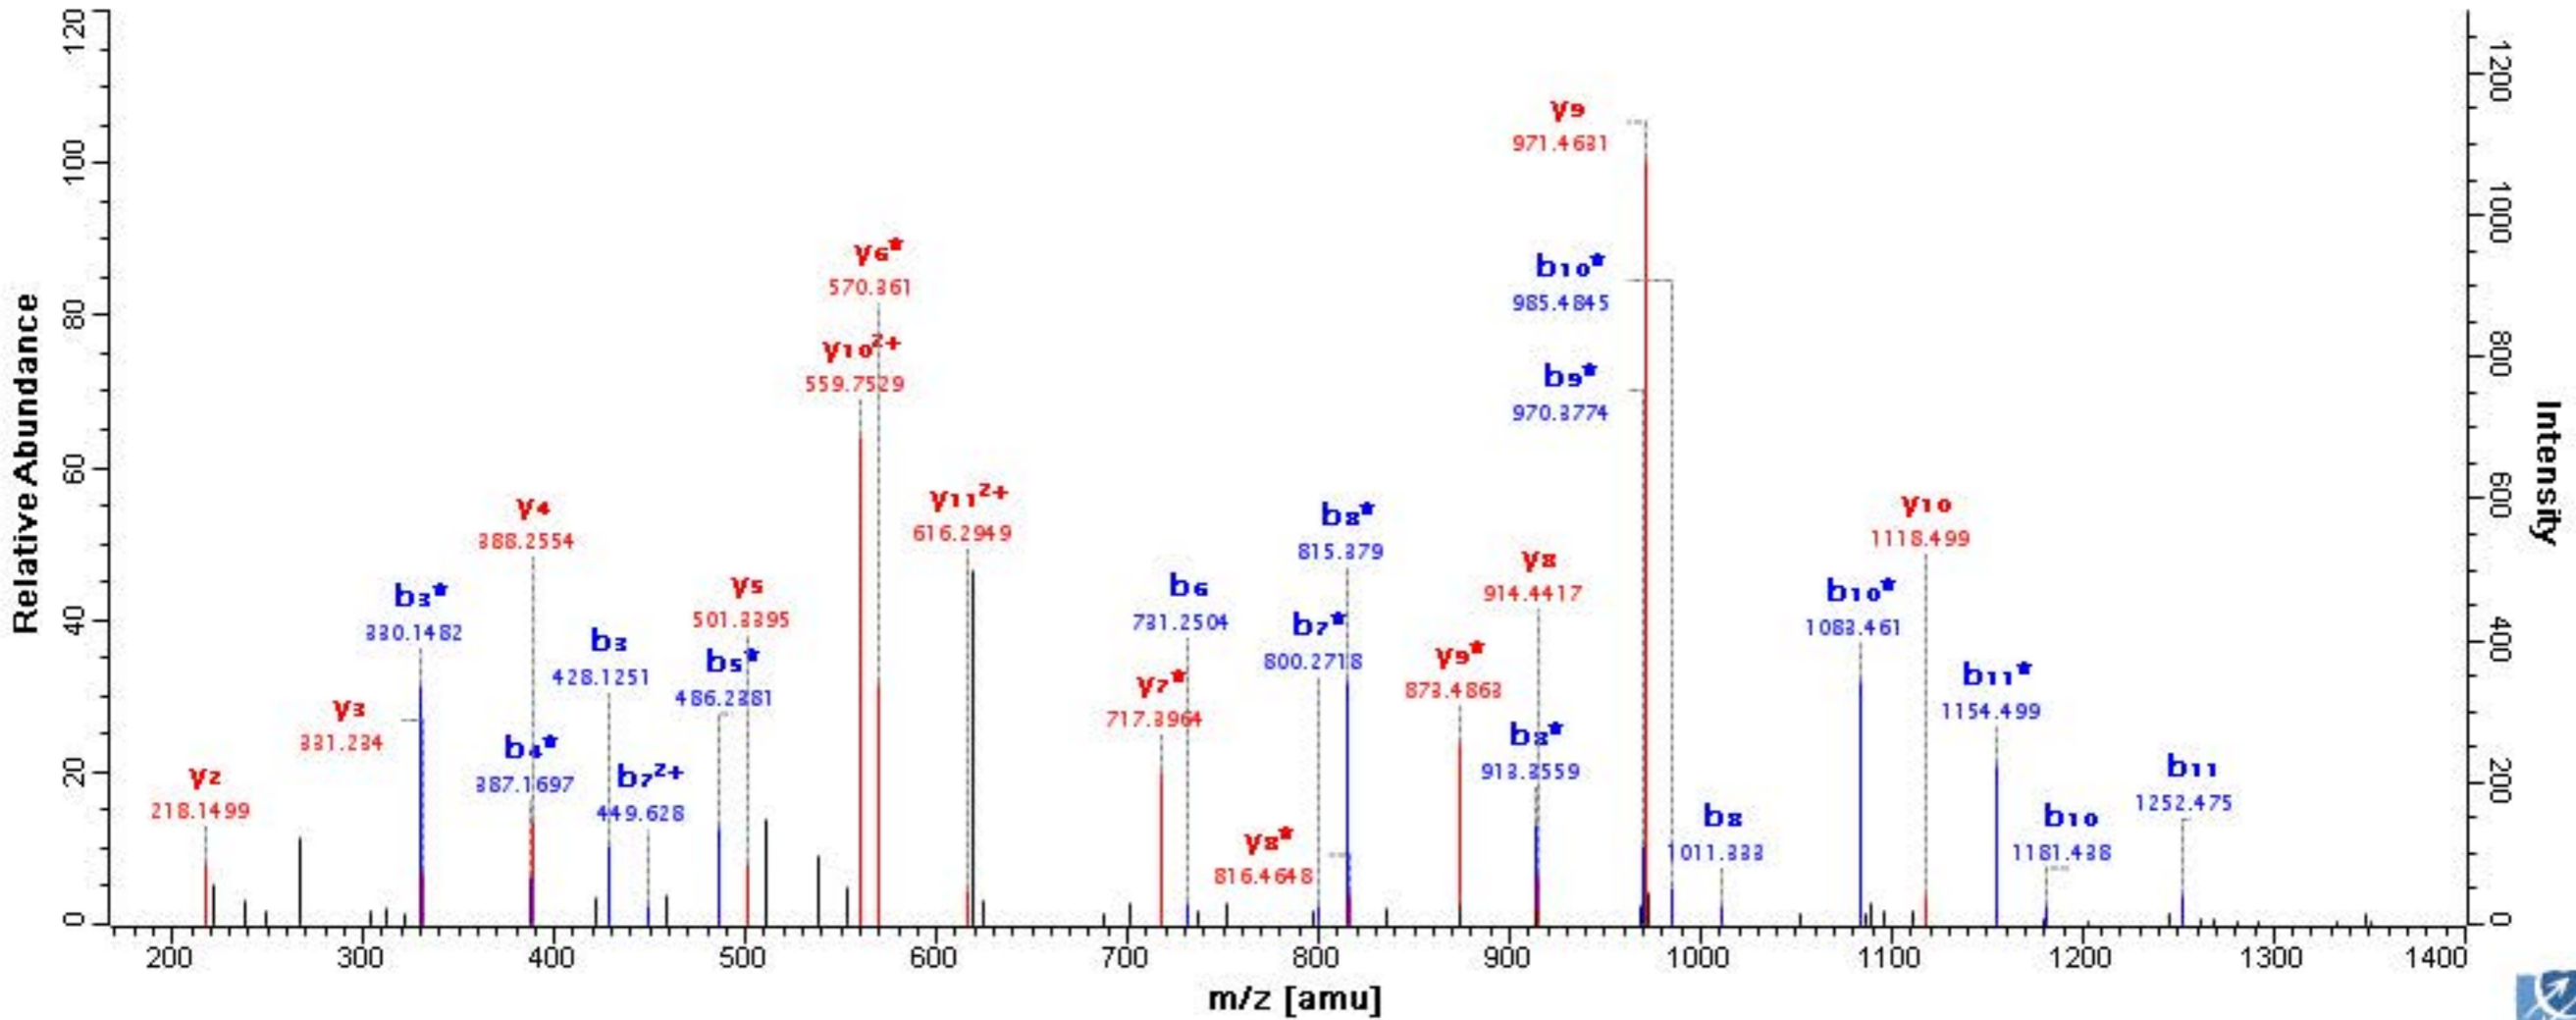

**precursor information**

|                   |                     |
|-------------------|---------------------|
| Mass:             | 1397.57376          |
| m/z:              | System.Collections. |
| Charge:           | System.Collections. |
| Retentiontime:    | System.Collections. |
| Score:            | 194.1242            |
| Mass Error [ppm]: | 0.049499            |
| PEP:              | 9.2336E-43          |
| Precursor Type:   | MULTI               |

**general information**

|                       |           |
|-----------------------|-----------|
| Annotation:           | 10 of 12  |
| AminoAcids Coverag    | 83 %      |
| Intensity Coverage:   | 76 %      |
| Protein Localisation: | 46 ... 57 |

| b <sup>2+</sup> ion |          | b ion     |          |     | γ ion |          | γ <sup>2+</sup> ion |           |           |           |
|---------------------|----------|-----------|----------|-----|-------|----------|---------------------|-----------|-----------|-----------|
| Δ dalton            | mass     | Δ dalton  | mass     | seq |       | Δ dalton | mass                | Δ dalton  | mass      |           |
|                     | 168.0056 |           | 168.0056 | 1   | S     | 11       |                     |           |           |           |
|                     | 281.0897 |           | 281.0897 | 2   | I     | 10       | 1231.583            | 616.2949  | +0.232951 |           |
|                     | 428.1251 | -0.049293 | 428.1251 | 3   | M     | 9        | 1118.499            | +0.078848 | 559.7529  | +0.038532 |
|                     | 485.1466 |           | 485.1466 | 4   | G     | 8        | 971.4631            | +0.013234 | 971.4631  |           |
|                     | 584.215  |           | 584.215  | 5   | V     | 7        | 914.4417            | +0.248199 | 914.4417  |           |
|                     | 731.2504 | -0.045602 | 731.2504 | 6   | M     | 6        | 815.3733            |           | 815.3733  |           |
| -0.336685           | 449.628  |           | 898.2487 | 7   | S     | 5        | 668.3379            |           | 668.3379  |           |
|                     | 1011.333 | -0.030247 | 1011.333 | 8   | I     | 4        | 501.3395            | +0.115996 | 501.3395  |           |
|                     | 1068.354 |           | 1068.354 | 9   | G     | 3        | 388.2554            | +0.027086 | 388.2554  |           |
|                     | 1181.438 | +0.031767 | 1181.438 | 10  | I     | 2        | 331.234             | -0.025181 | 331.234   |           |
|                     | 1252.475 | +0.067895 | 1252.475 | 11  | A     | 1        | 218.1499            | +0.013412 | 218.1499  |           |
|                     |          |           |          | 12  | K     | 0        | 147.1128            |           | 147.1128  |           |

Source: 20120530\_VR\_Bsu\_TripleSILAC\_pWTPPrkCPrpC\_F19  
 Scannumber: 9375  
 Protein: BSU08790; thiA; thiC  
 Peptide Score: 101.89  
 Method: ITMS; CID; 3

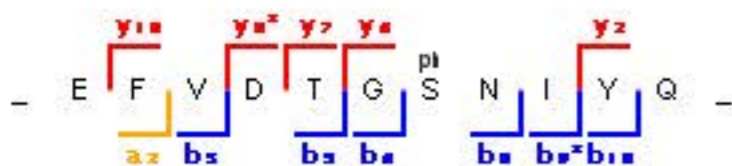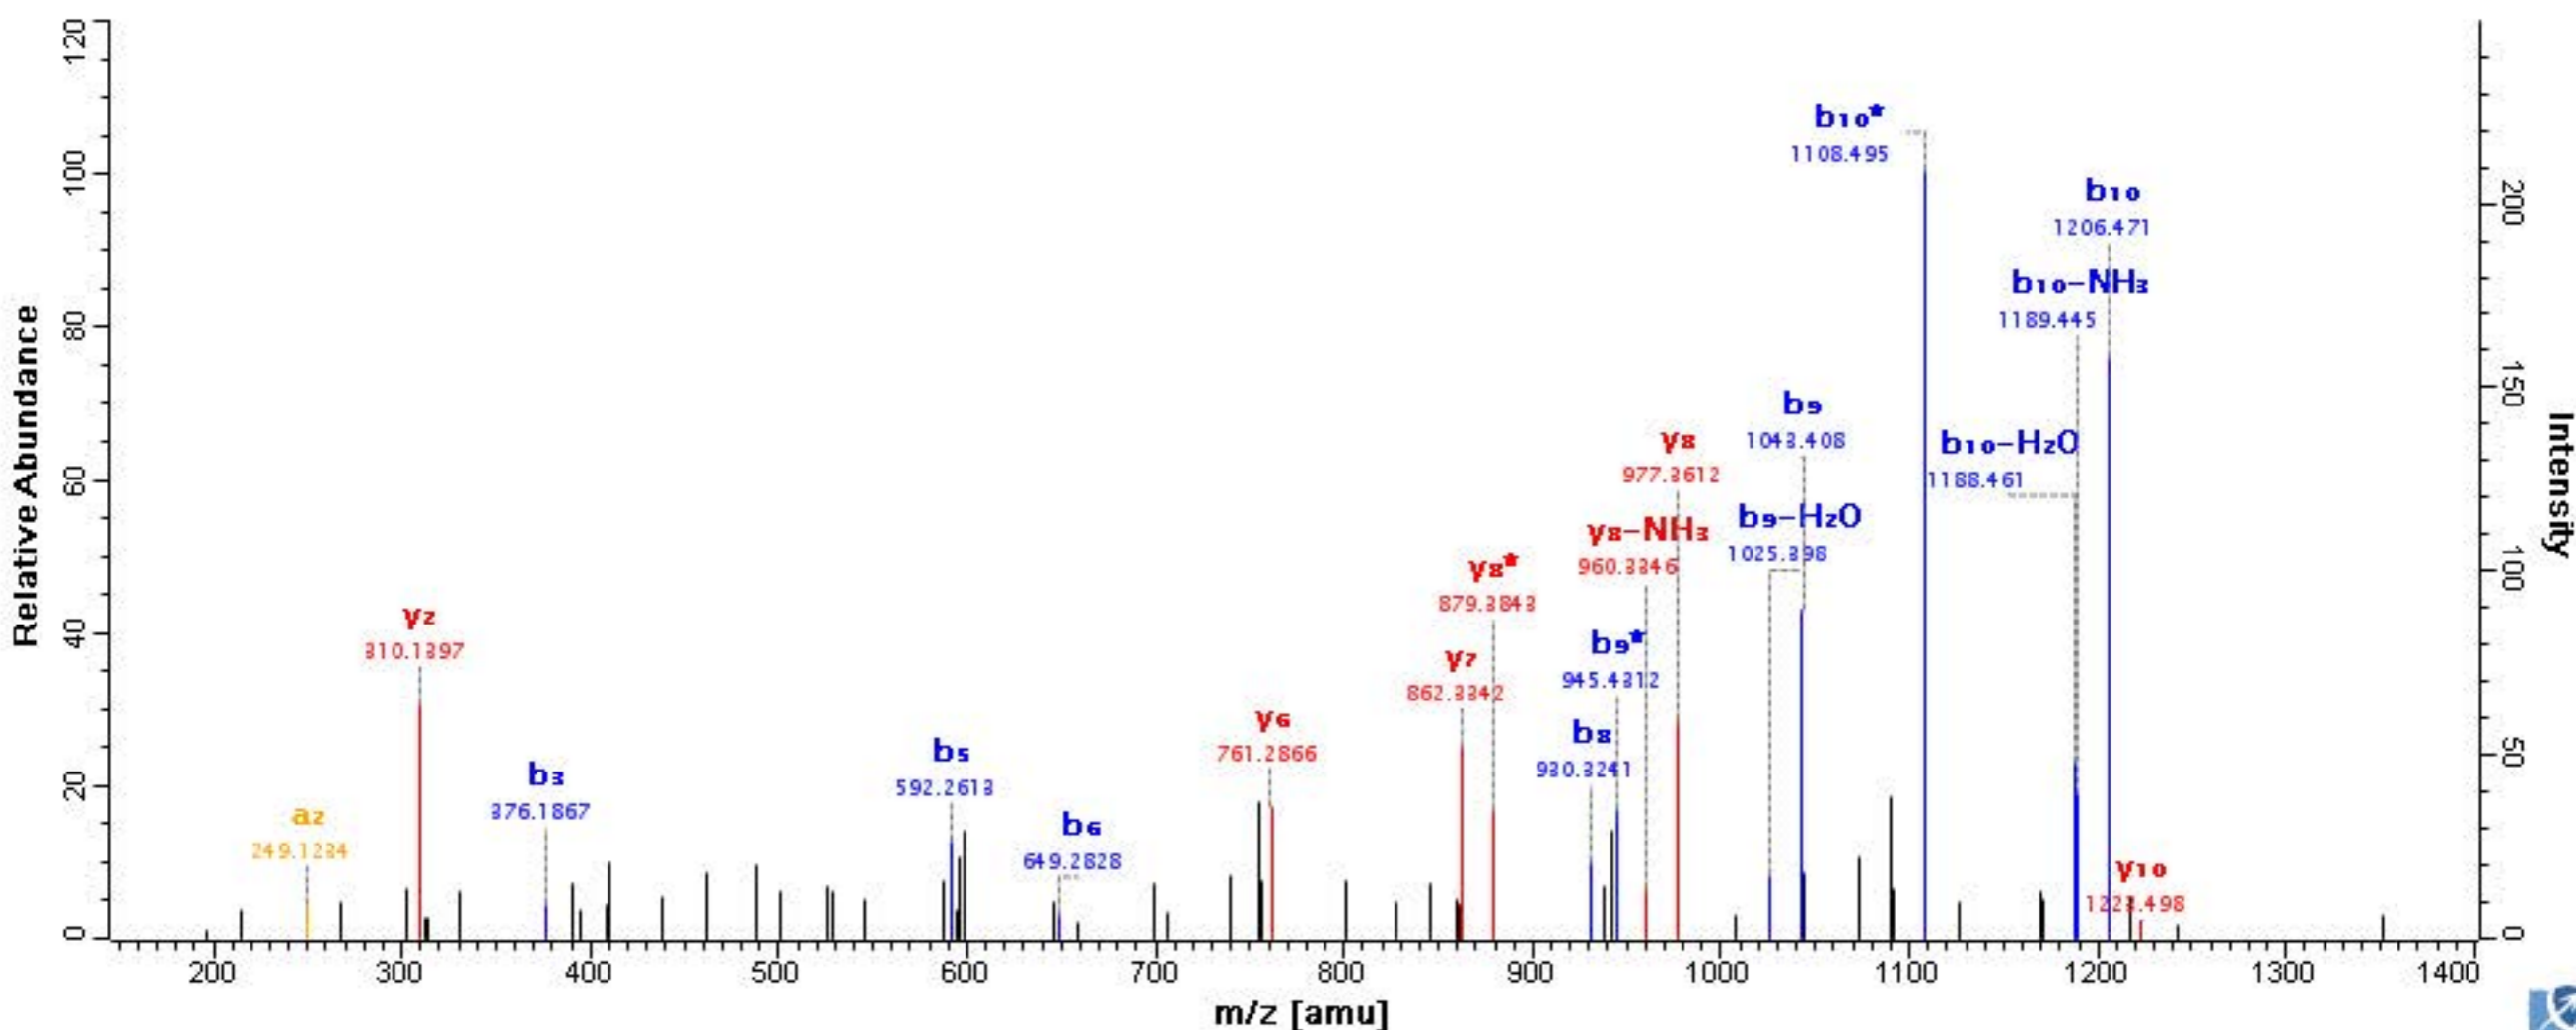

#### precursor information

|                   |                     |
|-------------------|---------------------|
| Mass:             | 1351.53345          |
| m/z:              | System.Collections. |
| Charge:           | System.Collections. |
| Retentiontime:    | System.Collections. |
| Score:            | 101.8882            |
| Mass Error [ppm]: | 0.092978            |
| PEP:              | 0.0094527           |
| Precursor Type:   | ISO                 |

#### general information

|                       |             |
|-----------------------|-------------|
| Annotation:           | 8 of 11     |
| AminoAcids Coverag    | 73 %        |
| Intensity Coverage:   | 58 %        |
| Protein Localisation: | 580 ... 590 |

| a ion           |              | b ion           |              |     | y ion           |      |                         |
|-----------------|--------------|-----------------|--------------|-----|-----------------|------|-------------------------|
| $\Delta$ dalton | mass         | $\Delta$ dalton | mass         | seq | $\Delta$ dalton | mass |                         |
|                 | 102.05495494 |                 | 130.04986956 | 1   | E               | 10   |                         |
| +0.0780777      | 249.12336886 |                 | 277.11828348 | 2   | F               | 9    | 1223.4980105 -0.2806033 |
|                 | 348.19178277 | -0.2008576      | 376.1866974  | 3   | V               | 8    | 1076.4295966            |
|                 | 463.21872581 |                 | 491.21364043 | 4   | D               | 7    | 977.36118268 +0.1300893 |
|                 | 564.26640428 | +0.0511201      | 592.2613189  | 5   | T               | 6    | 862.33423965 -0.0944325 |
|                 | 621.287868   | +0.1188287      | 649.28278262 | 6   | G               | 5    | 761.28656117 +0.0971669 |
|                 | 788.28622682 |                 | 816.28114144 | 7   | S               | 4    | 704.26509745            |
|                 | 902.32915427 | +0.0019199      | 930.32406889 | 8   | N               | 3    | 537.26673863            |
|                 | 1015.4132182 | -0.0831817      | 1043.4081329 | 9   | I               | 2    | 423.22381118            |
|                 | 1178.4765468 | -0.0843764      | 1206.4714614 | 10  | Y               | 1    | 310.1397472 -0.0176159  |
|                 |              |                 |              | 11  | Q               | 0    | 147.07641866            |

Source: 20120530\_VR\_Bsu\_TripleSILAC\_pWTPrkCPrpC\_F19  
 Scannumber: 9734  
 Protein: BSU21770; ilvA  
 Peptide Score: 167.32  
 Method: ITMS; CID; 3

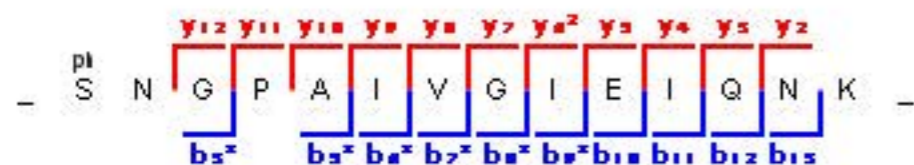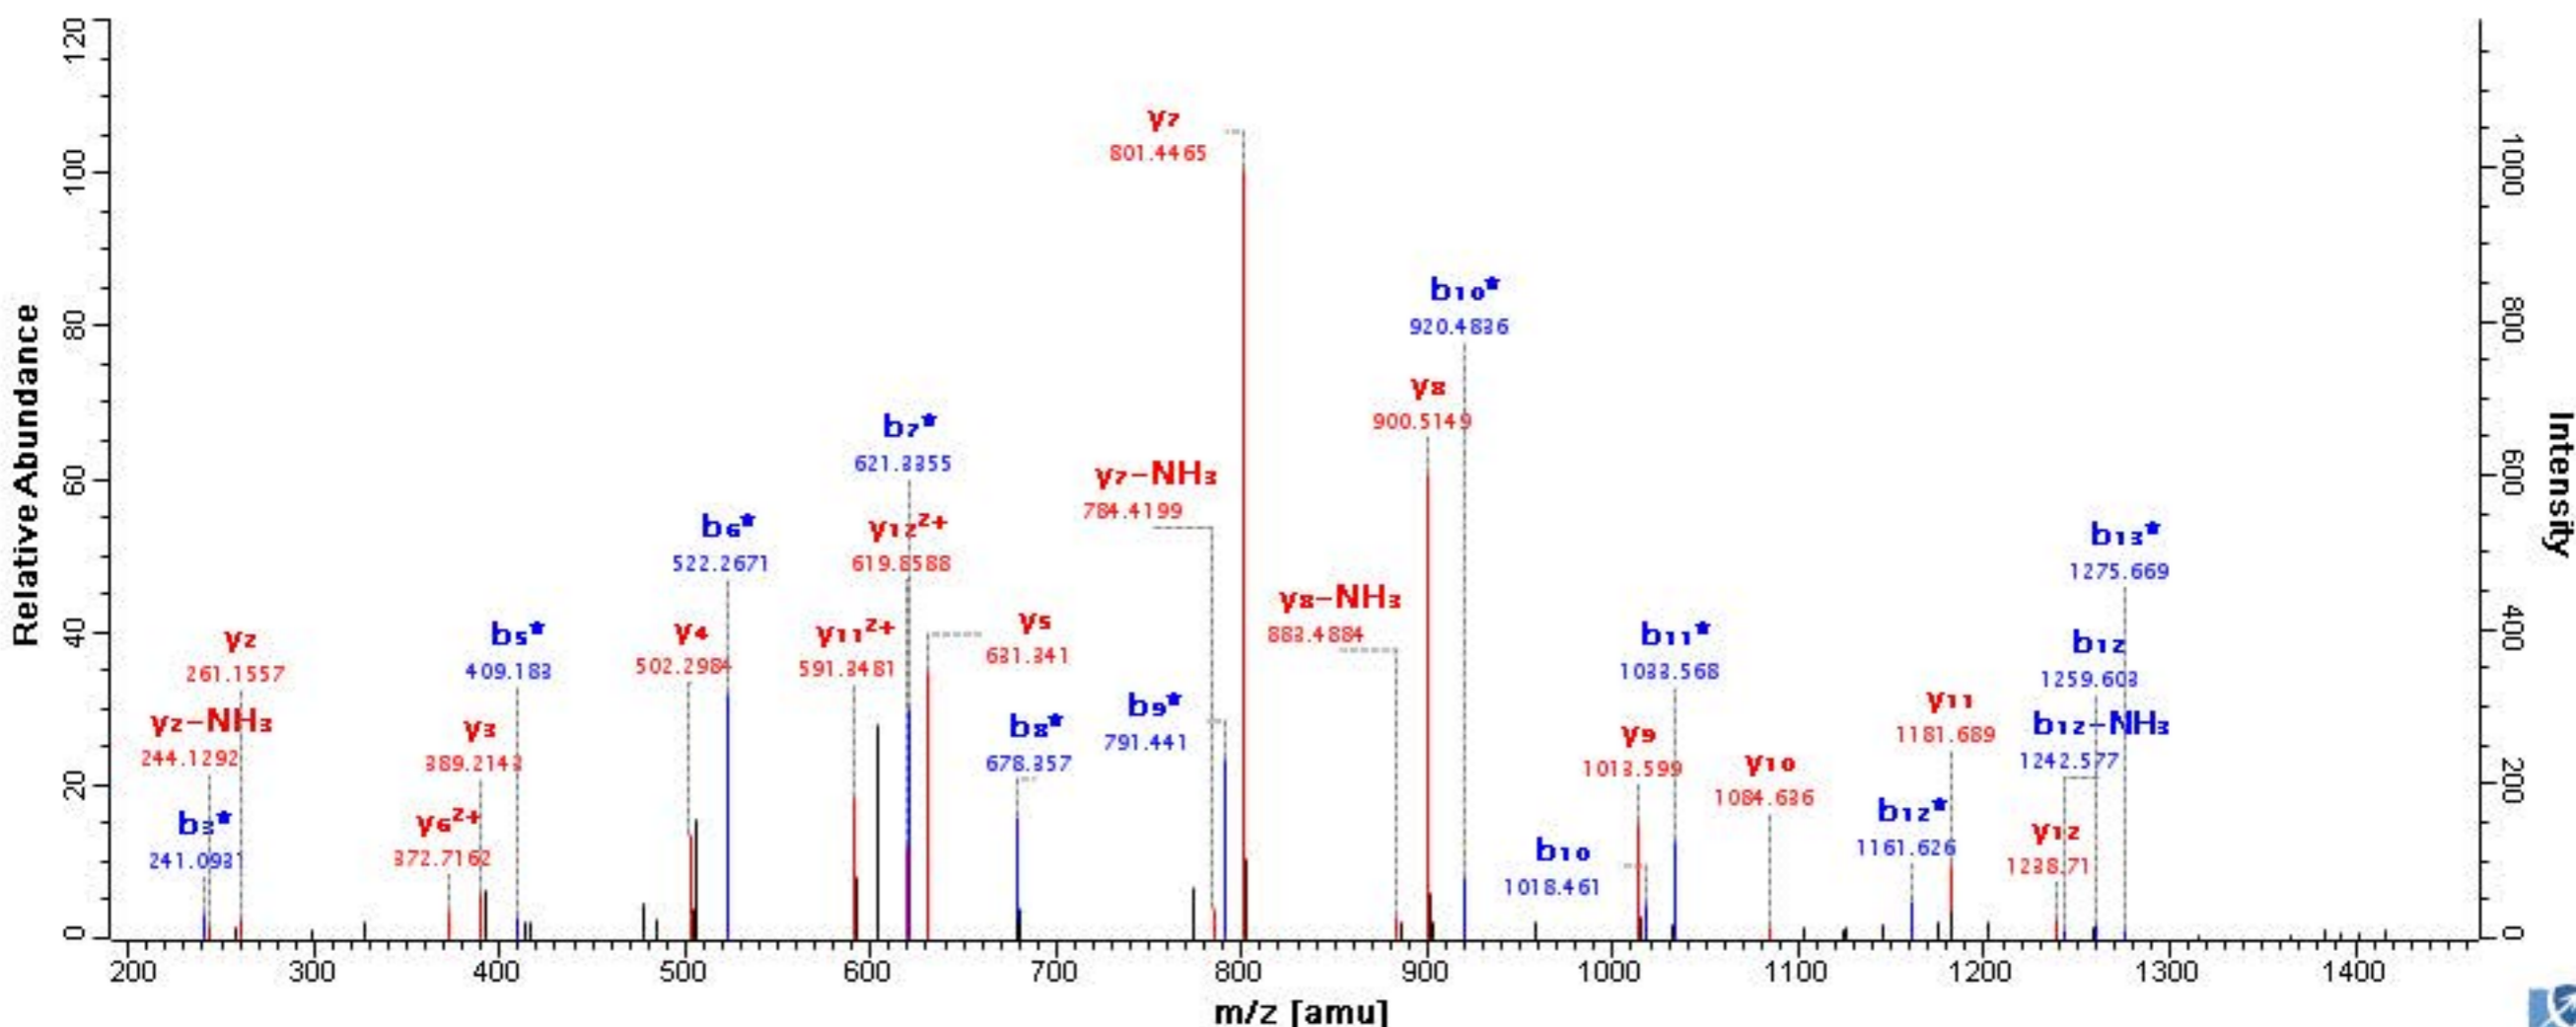

#### precursor information

|                   |                     |
|-------------------|---------------------|
| Mass:             | 1518.74457          |
| m/z:              | System.Collections. |
| Charge:           | System.Collections. |
| Retentiontime:    | System.Collections. |
| Score:            | 167.3248            |
| Mass Error [ppm]: | 0.15996             |
| PEP:              | 2.9713E-30          |
| Precursor Type:   | MULTI               |

#### general information

|                       |             |
|-----------------------|-------------|
| Annotation:           | 11 of 14    |
| AminoAcids Coverage:  | 79 %        |
| Intensity Coverage:   | 75 %        |
| Protein Localisation: | 378 ... 391 |

| b ion           |              |    |     |    | y ion           |            | y <sup>2+</sup> ion |            |
|-----------------|--------------|----|-----|----|-----------------|------------|---------------------|------------|
| $\Delta$ dalton | mass         |    | seq |    | $\Delta$ dalton | mass       | $\Delta$ dalton     | mass       |
|                 | 168.00563528 | 1  | S   | 13 |                 |            |                     |            |
|                 | 282.04856273 | 2  | N   | 12 | 1352.7532406    |            | 1352.7532406        |            |
|                 | 339.07002646 | 3  | G   | 11 | 1238.7103132    | +0.26039   | 619.85879482        | +0.034943  |
|                 | 436.12279031 | 4  | P   | 10 | 1181.6888494    | +0.0548029 | 591.34806296        | -0.0774941 |
|                 | 507.1599041  | 5  | A   | 9  | 1084.6360856    | -0.0982438 | 1084.6360856        |            |
|                 | 620.24396808 | 6  | I   | 8  | 1013.5989718    | -0.000278  | 1013.5989718        |            |
|                 | 719.31238199 | 7  | V   | 7  | 900.51490783    | +0.045578  | 900.51490783        |            |
|                 | 776.33384572 | 8  | G   | 6  | 801.44649391    | +0.0232937 | 801.44649391        |            |
|                 | 889.4179097  | 9  | I   | 5  | 744.42503019    |            | 372.71615333        | -0.3160679 |
| +0.0135573      | 1018.4605028 | 10 | E   | 4  | 631.34096621    | +0.0290289 | 631.34096621        |            |
|                 | 1131.5445668 | 11 | I   | 3  | 502.29837311    | +0.1136142 | 502.29837311        |            |
| +0.3002981      | 1259.6031443 | 12 | Q   | 2  | 389.21430913    | +0.0544897 | 389.21430913        |            |
|                 | 1373.6460717 | 13 | N   | 1  | 261.15573162    | +0.0933529 | 261.15573162        |            |
|                 |              | 14 | K   | 0  | 147.11280417    |            | 147.11280417        |            |

Source: 20120530\_VR\_Bsu\_TripleSILAC\_pWTPPrkCPrpC\_F19  
 Scannumber: 9977  
 Protein: acp5; BSU04620; ydc8  
 Peptide Score: 184.76  
 Method: ITMS; CID; 3

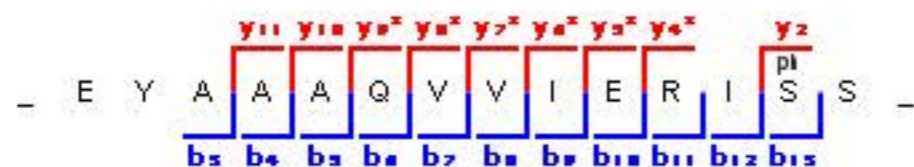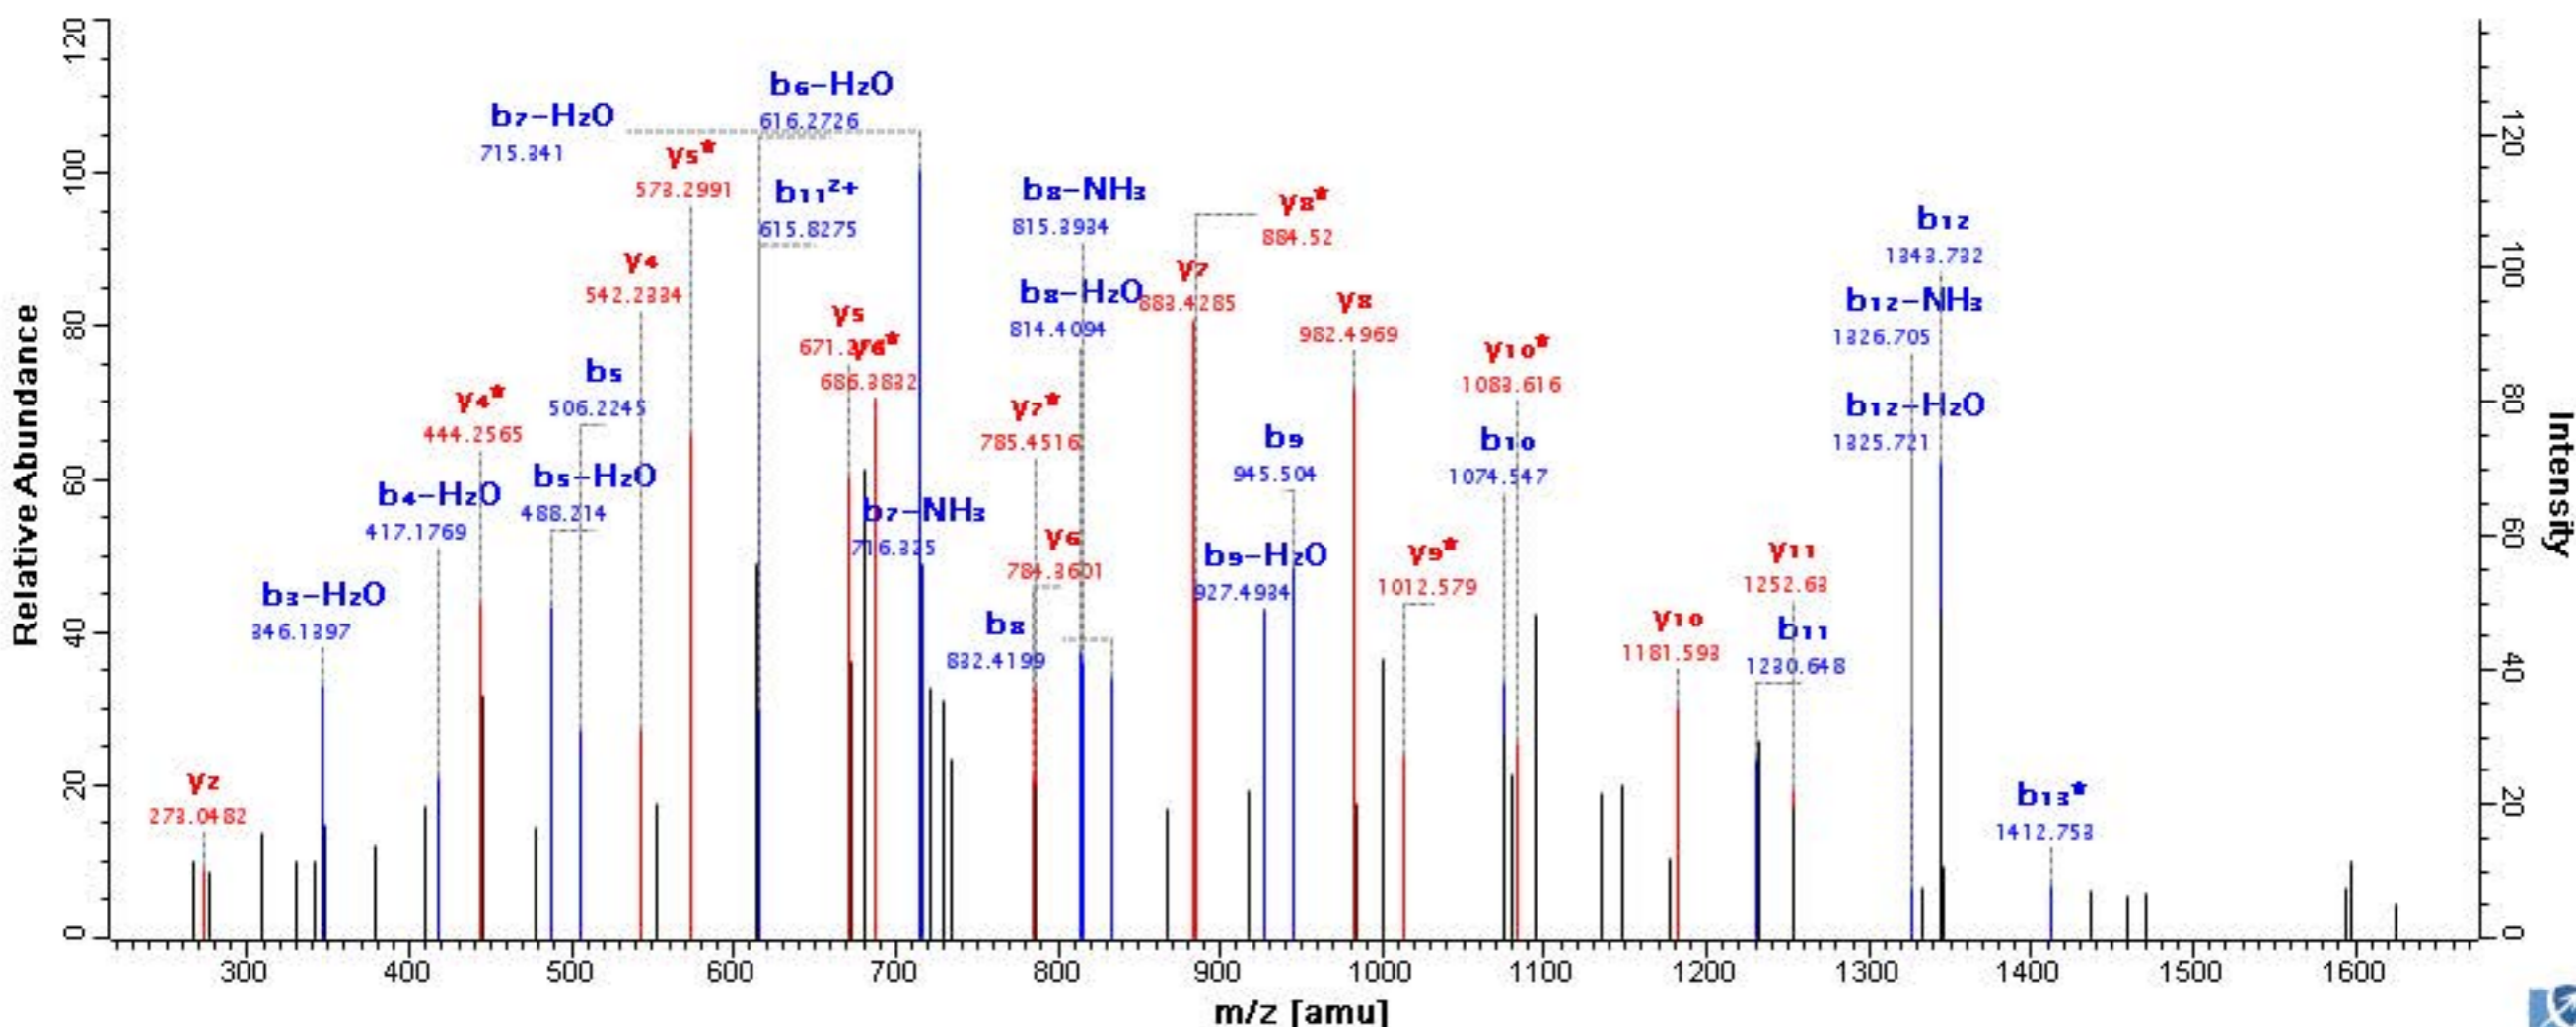

#### precursor information

|                   |                     |
|-------------------|---------------------|
| Mass:             | 1614.76474          |
| m/z:              | System.Collections. |
| Charge:           | System.Collections. |
| Retentiontime:    | System.Collections. |
| Score:            | 184.7638            |
| Mass Error [ppm]: | -0.4396             |
| PEP:              | 1.7362E-63          |
| Precursor Type:   | ISO                 |

#### general information

|                       |             |
|-----------------------|-------------|
| Annotation:           | 11 of 14    |
| AminoAcids Coverage:  | 79 %        |
| Intensity Coverage:   | 64 %        |
| Protein Localisation: | 108 ... 121 |

| b <sup>2+</sup> ion |              | b ion      |              |    |     | y ion        |            |
|---------------------|--------------|------------|--------------|----|-----|--------------|------------|
| Δ dalton            | mass         | Δ dalton   | mass         |    | seq | Δ dalton     | mass       |
|                     | 130.04986956 |            | 130.04986956 | 1  | E   |              |            |
|                     | 293.1131981  |            | 293.1131981  | 2  | Y   | 1486.7301357 |            |
|                     | 364.15031189 |            | 364.15031189 | 3  | A   | 1323.6668072 |            |
|                     | 435.18742568 |            | 435.18742568 | 4  | A   | 1252.6296934 | +0.0930849 |
|                     | 506.22453946 | -0.0527865 | 506.22453946 | 5  | A   | 1181.5925796 | +0.2743638 |
|                     | 634.28311698 |            | 634.28311698 | 6  | Q   | 1110.5554658 |            |
|                     | 733.35153089 |            | 733.35153089 | 7  | V   | 982.4968883  | -0.0281993 |
|                     | 832.41994481 | -0.0460434 | 832.41994481 | 8  | V   | 883.42847438 | +0.0537034 |
|                     | 945.50400879 | +0.0688062 | 945.50400879 | 9  | I   | 784.36006047 | +0.40471   |
|                     | 1074.5466019 | +0.0776657 | 1074.5466019 | 10 | E   | 671.27599649 | -0.0377763 |
| +0.0272416          | 615.82749469 | -0.0094072 | 1230.6477129 | 11 | R   | 542.23340339 | -0.1383106 |
|                     | 1343.7317769 | -0.01144   | 1343.7317769 | 12 | I   | 386.13229236 |            |
|                     | 1510.7301357 |            | 1510.7301357 | 13 | S   | 273.04822838 | -0.0036422 |
|                     |              |            |              | 14 | S   | 106.04986956 |            |



Source: 20120601\_VR\_Bsu\_TripleSILAC\_pWTPPrkCPrpC\_F06  
 Scannumber: 10764  
 Protein: BSU37660; ipa-88d; pta; ywf  
 Peptide Score: 87.88  
 Method: ITMS; CID; 3

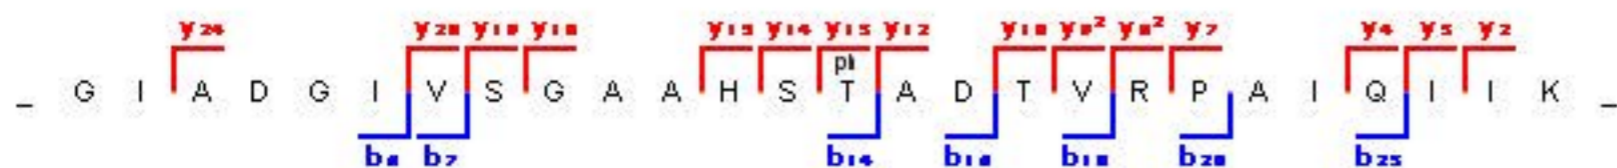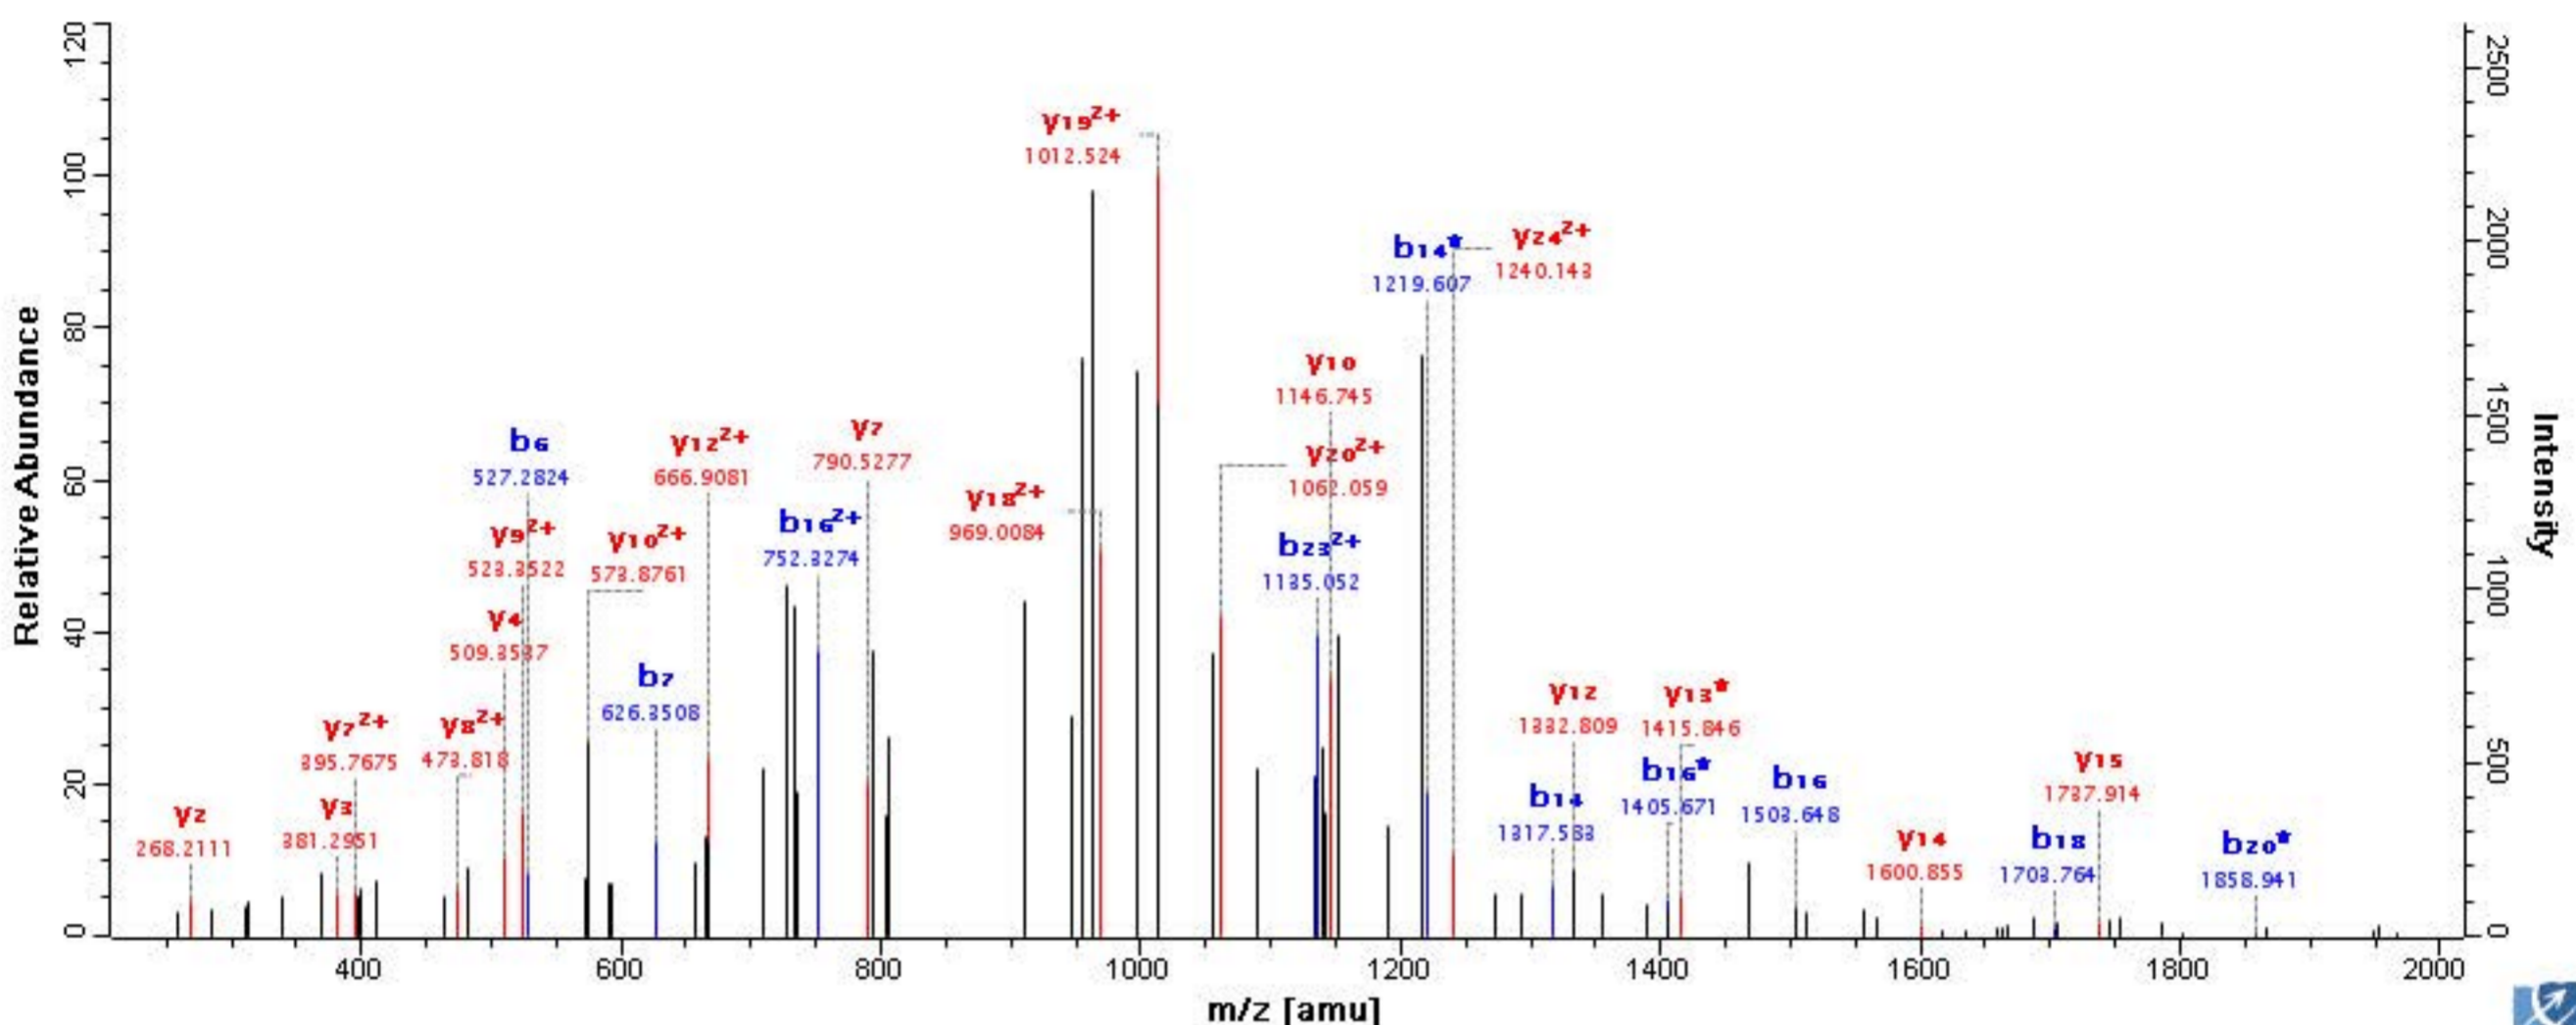

#### precursor information

|                   |                     |
|-------------------|---------------------|
| Mass:             | 2648.37789          |
| m/z:              | System.Collections. |
| Charge:           | System.Collections. |
| Retentiontime:    | System.Collections. |
| Score:            | 87.88075            |
| Mass Error [ppm]: | 0.024362            |
| PEP:              | 6.2465E-13          |
| Precursor Type:   | ISO                 |

| b <sup>2+</sup> ion |          | b ion     |          |    |     |    | y ion    |           | y <sup>2+</sup> ion |           |
|---------------------|----------|-----------|----------|----|-----|----|----------|-----------|---------------------|-----------|
| Δ dalton            | mass     | Δ dalton  | mass     |    | seq |    | Δ dalton | mass      | Δ dalton            | mass      |
|                     | 58.02874 |           | 58.02874 | 1  | G   | 25 |          |           |                     |           |
|                     | 171.1128 |           | 171.1128 | 2  | I   | 24 | 2592.364 |           | 2592.364            |           |
|                     | 242.1499 |           | 242.1499 | 3  | A   | 23 | 2479.28  |           | 1240.143            | +0.239385 |
|                     | 357.1769 |           | 357.1769 | 4  | D   | 22 | 2408.242 |           | 2408.242            |           |
|                     | 414.1983 |           | 414.1983 | 5  | G   | 21 | 2293.216 |           | 2293.216            |           |
|                     | 527.2824 | +0.006124 | 527.2824 | 6  | I   | 20 | 2236.194 |           | 2236.194            |           |
|                     | 626.3508 | +0.035611 | 626.3508 | 7  | V   | 19 | 2123.11  |           | 1062.059            | +0.262654 |
|                     | 713.3828 |           | 713.3828 | 8  | S   | 18 | 2024.042 |           | 1012.524            | +0.36516  |
|                     | 770.4043 |           | 770.4043 | 9  | G   | 17 | 1937.01  |           | 969.0084            | +0.288706 |
|                     | 841.4414 |           | 841.4414 | 10 | A   | 16 | 1879.988 |           | 1879.988            |           |
|                     | 912.4785 |           | 912.4785 | 11 | A   | 15 | 1808.951 |           | 1808.951            |           |
|                     | 1049.537 |           | 1049.537 | 12 | H   | 14 | 1737.914 | +0.104451 | 1737.914            |           |
|                     | 1136.569 |           | 1136.569 | 13 | S   | 13 | 1600.855 | +0.080355 | 1600.855            |           |
|                     | 1317.583 | +0.201563 | 1317.583 | 14 | T   | 12 | 1513.823 |           | 1513.823            |           |
|                     | 1388.621 |           | 1388.621 | 15 | A   | 11 | 1332.809 | +0.079639 | 666.9081            | -0.051587 |
| +0.200369           | 752.3274 | +0.045221 | 1503.648 | 16 | D   | 10 | 1261.772 |           | 1261.772            |           |
|                     | 1604.695 |           | 1604.695 | 17 | T   | 9  | 1146.745 | +0.105977 | 573.8761            | -0.061307 |
|                     | 1703.764 | +0.346487 | 1703.764 | 18 | V   | 8  | 1045.697 |           | 523.3522            | -0.030937 |
|                     | 1859.865 |           | 1859.865 | 19 | R   | 7  | 946.6288 |           | 473.818             | +0.226598 |
|                     | 1956.917 |           | 1956.917 | 20 | P   | 6  | 790.5277 | -0.270509 | 395.7675            | +0.44793  |
|                     | 2027.955 |           | 2027.955 | 21 | A   | 5  | 693.4749 |           | 693.4749            |           |
|                     | 2141.039 |           | 2141.039 | 22 | I   | 4  | 622.4378 |           | 622.4378            |           |
| +0.100813           | 1135.052 |           | 2269.097 | 23 | Q   | 3  | 509.3537 | -0.007883 | 509.3537            |           |
|                     | 2382.181 |           | 2382.181 | 24 | I   | 2  | 381.2951 | -0.117885 | 381.2951            |           |
|                     | 2495.265 |           | 2495.265 | 25 | I   | 1  | 268.2111 | +0.068657 | 268.2111            |           |
|                     |          |           |          | 26 | K   | 0  | 155.127  |           | 155.127             |           |

#### general information

|                       |             |
|-----------------------|-------------|
| Annotation:           | 18 of 26    |
| AminoAcids Coverage:  | 69 %        |
| Intensity Coverage:   | 32 %        |
| Protein Localisation: | 116 ... 141 |

Source: 20120601\_VR\_Bsu\_TripleSILAC\_pWTPPrkCPrpC\_F06  
 Scannumber: 8656  
 Protein: BSU17210; pksN  
 Peptide Score: 69.76  
 Method: ITMS; CID; 3

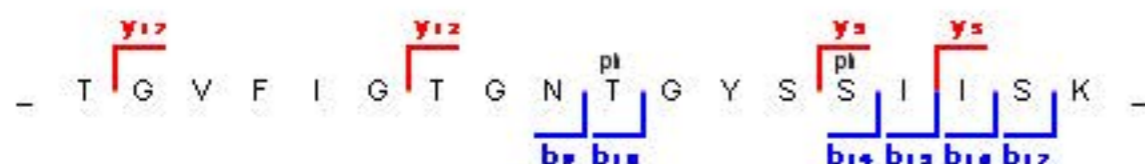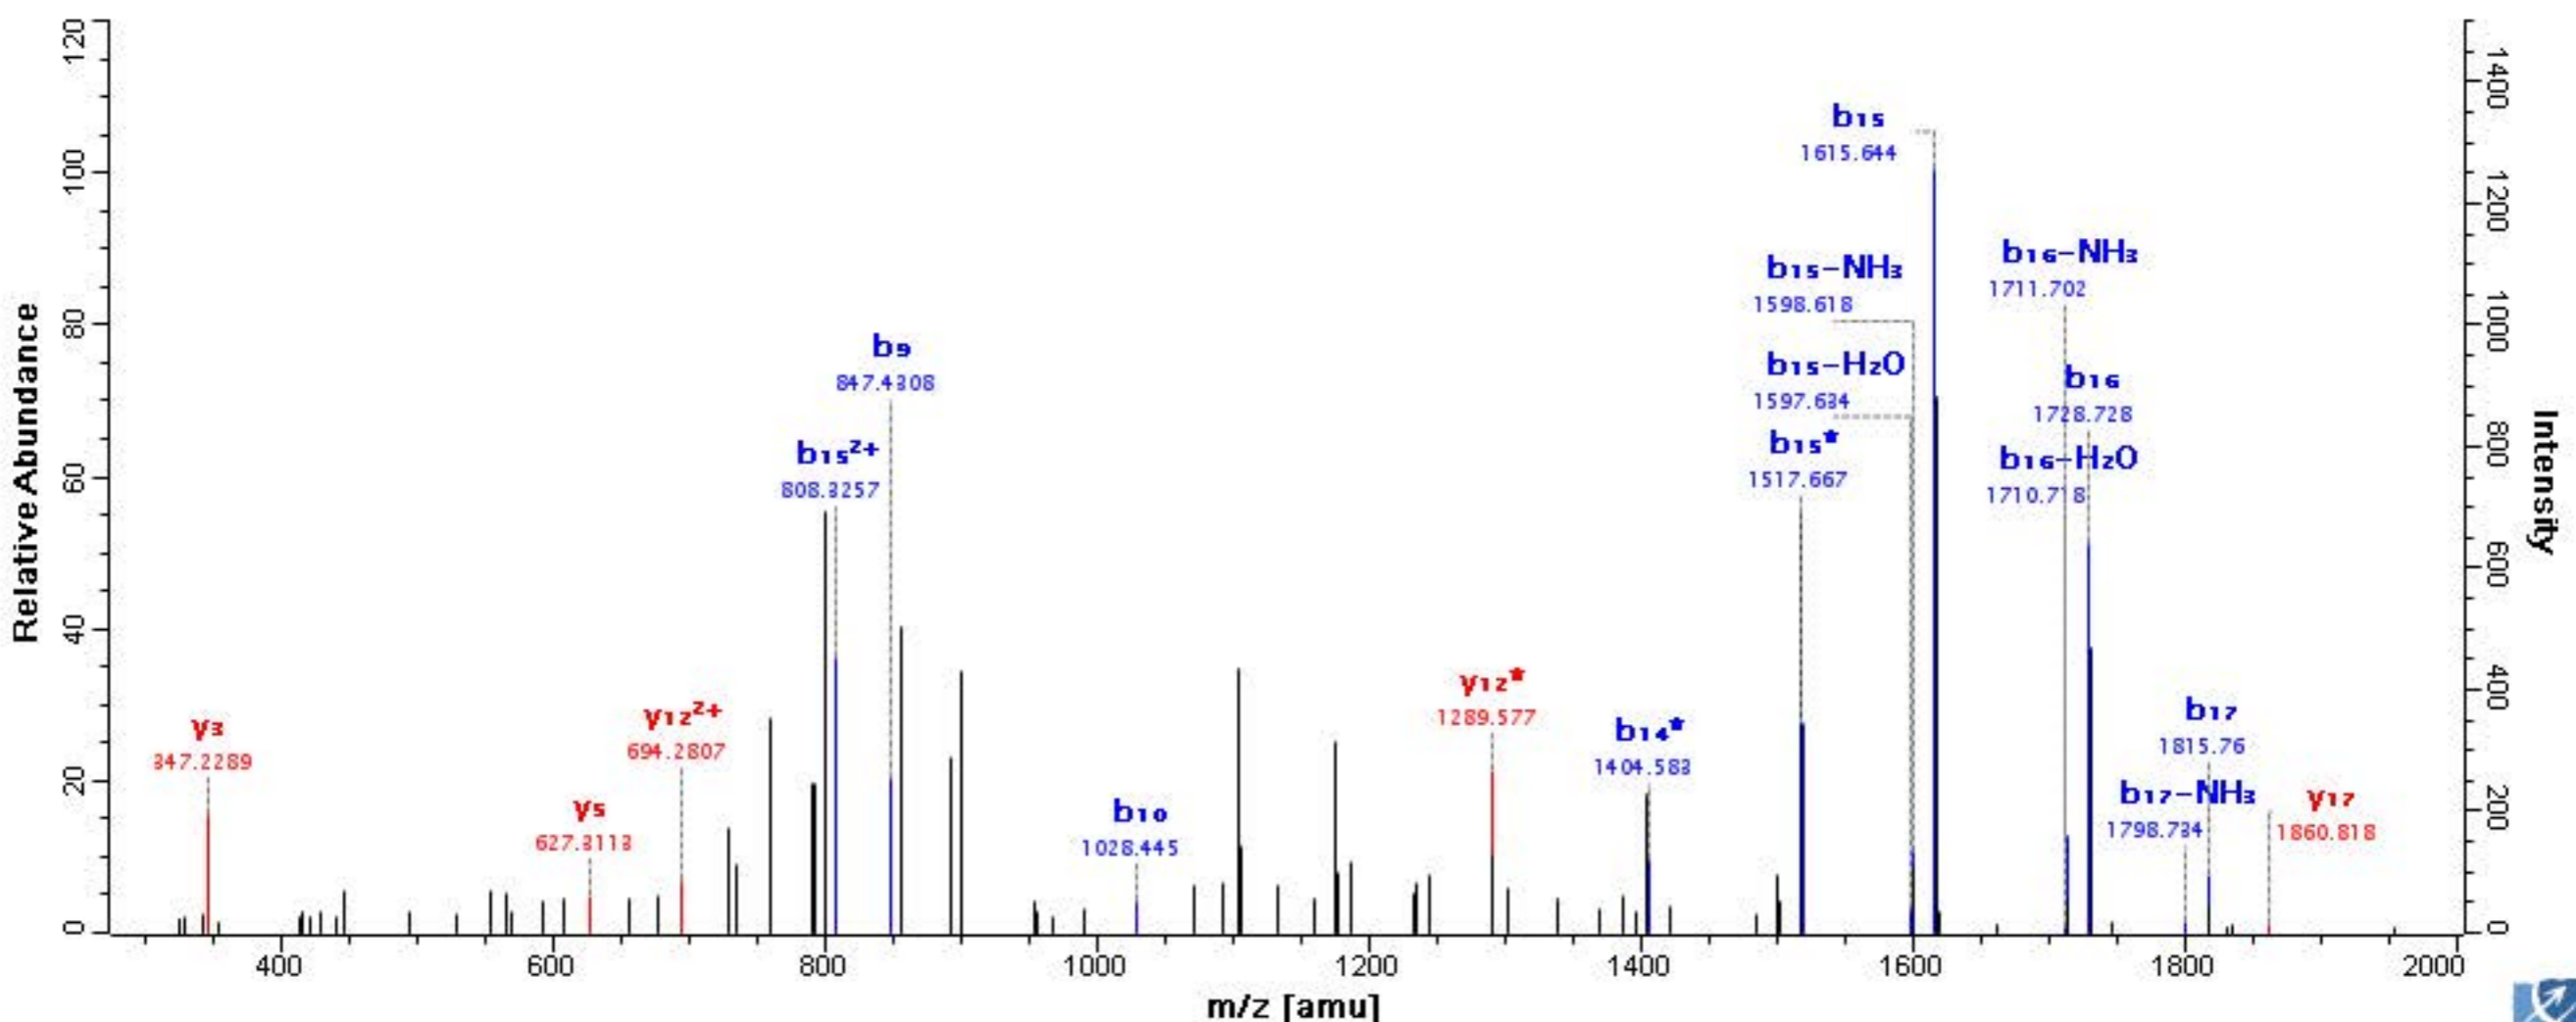

#### precursor information

|                   |                     |
|-------------------|---------------------|
| Mass:             | 1960.85885          |
| m/z:              | System.Collections. |
| Charge:           | System.Collections. |
| Retentiontime:    | System.Collections. |
| Score:            | 69.76321            |
| Mass Error [ppm]: | 0.21141             |
| PEP:              | 0.12437             |
| Precursor Type:   | ISO                 |

| b <sup>2+</sup> ion |          | b ion     |          |    |     |    | γ ion    |           | γ <sup>2+</sup> ion |           |
|---------------------|----------|-----------|----------|----|-----|----|----------|-----------|---------------------|-----------|
| Δ dalton            | mass     | Δ dalton  | mass     |    | seq |    | Δ dalton | mass      | Δ dalton            | mass      |
|                     | 102.055  |           | 102.055  | 1  | T   | 17 |          |           |                     |           |
|                     | 159.0764 |           | 159.0764 | 2  | G   | 16 | 1860.818 | +0.155717 | 1860.818            |           |
|                     | 258.1448 |           | 258.1448 | 3  | V   | 15 | 1803.797 |           | 1803.797            |           |
|                     | 405.2132 |           | 405.2132 | 4  | F   | 14 | 1704.728 |           | 1704.728            |           |
|                     | 518.2973 |           | 518.2973 | 5  | I   | 13 | 1557.66  |           | 1557.66             |           |
|                     | 575.3188 |           | 575.3188 | 6  | G   | 12 | 1444.576 |           | 1444.576            |           |
|                     | 676.3665 |           | 676.3665 | 7  | T   | 11 | 1387.554 |           | 694.2807            | +0.231337 |
|                     | 733.3879 |           | 733.3879 | 8  | G   | 10 | 1286.507 |           | 1286.507            |           |
|                     | 847.4308 | -0.140439 | 847.4308 | 9  | N   | 9  | 1229.485 |           | 1229.485            |           |
|                     | 1028.445 | +0.204805 | 1028.445 | 10 | T   | 8  | 1115.442 |           | 1115.442            |           |
|                     | 1085.466 |           | 1085.466 | 11 | G   | 7  | 934.4281 |           | 934.4281            |           |
|                     | 1248.53  |           | 1248.53  | 12 | Y   | 6  | 877.4067 |           | 877.4067            |           |
|                     | 1335.562 |           | 1335.562 | 13 | S   | 5  | 714.3433 |           | 714.3433            |           |
|                     | 1502.56  |           | 1502.56  | 14 | S   | 4  | 627.3113 | -0.078287 | 627.3113            |           |
| -0.00574            | 808.3257 | +0.079292 | 1615.644 | 15 | I   | 3  | 460.313  |           | 460.313             |           |
|                     | 1728.728 | +0.176259 | 1728.728 | 16 | I   | 2  | 347.2289 | +0.03444  | 347.2289            |           |
|                     | 1815.76  | +0.182927 | 1815.76  | 17 | S   | 1  | 234.1448 |           | 234.1448            |           |
|                     |          |           |          | 18 | K   | 0  | 147.1128 |           | 147.1128            |           |

#### general information

|                       |               |
|-----------------------|---------------|
| Annotation:           | 8 of 18       |
| AminoAcids Coverag    | 44 %          |
| Intensity Coverage:   | 31 %          |
| Protein Localisation: | 2691 ... 2708 |

Source: 20120601\_VR\_Bsu\_TripleSILAC\_pWTPPrkCPrpC\_F08  
 Scannumber: 4622  
 Protein: BSU01120; fus; fusA  
 Peptide Score: 96.33  
 Method: ITMS; CID; 3

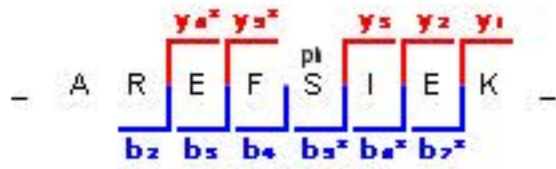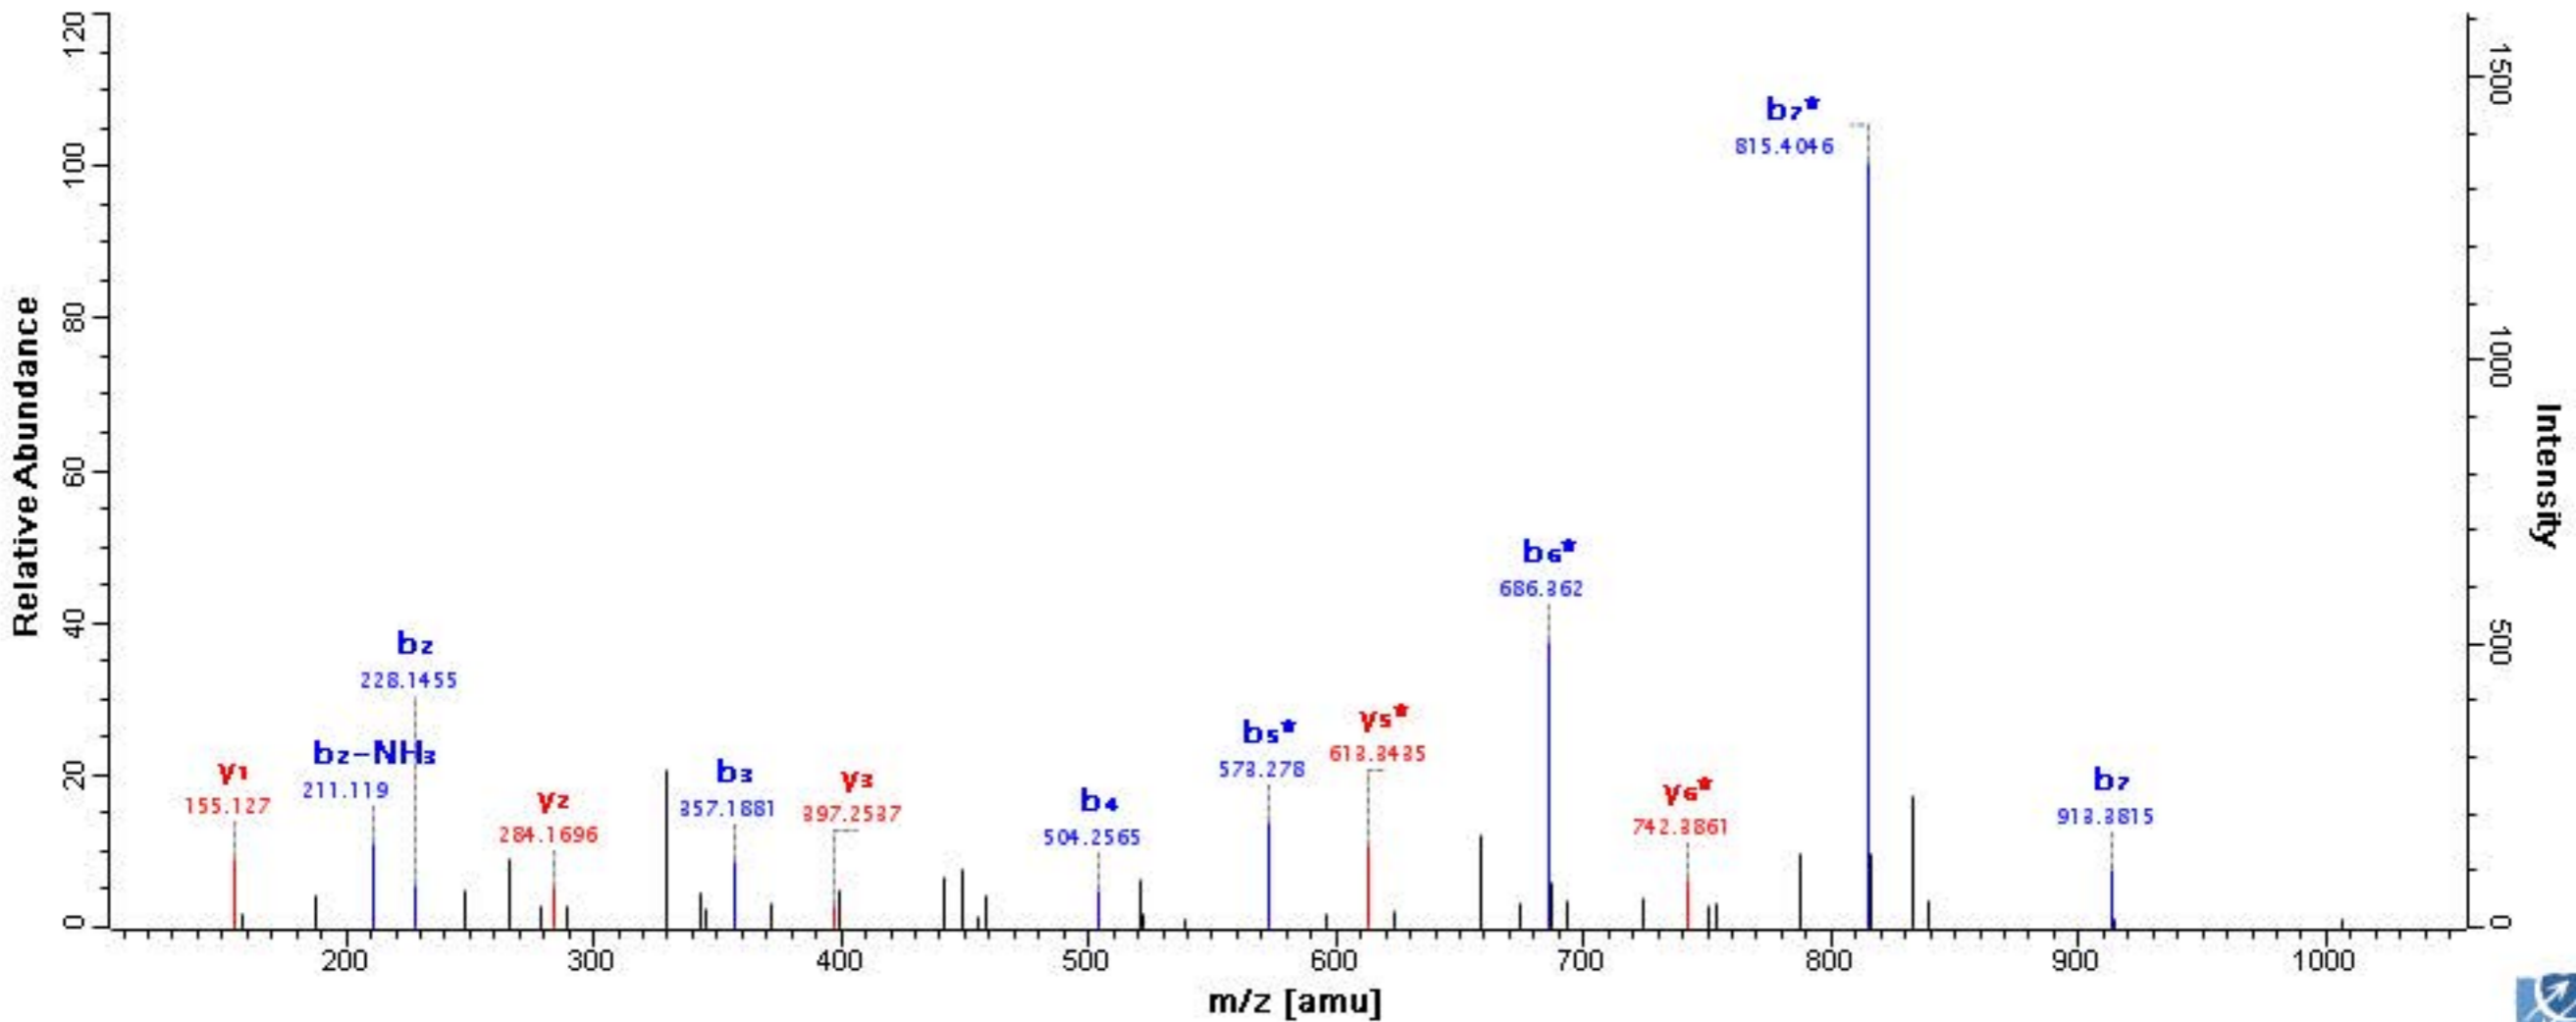

precursor information

|                       |                     |
|-----------------------|---------------------|
| Mass:                 | 1058.4798           |
| m/z:                  | System.Collections. |
| Charge:               | System.Collections. |
| Retentiontime:        | System.Collections. |
| Score:                | 96.33115            |
| Mass Error [ppm]:     | 0.022195            |
| g PEP:                | 0.033034            |
| Annotation:           | 7 of 8              |
| AminoAcids Coverag    | 88 %                |
| Intensity Coverage:   | 57 %                |
| Protein Localisation: | 2 ... 9             |

| b ion      |               |   |     | y ion |               |            |  |
|------------|---------------|---|-----|-------|---------------|------------|--|
| Δ dalton   | mass          |   | seq |       | Δ dalton      | mass       |  |
|            | 72.044390254  | 1 | A   | 7     |               |            |  |
| +0.087714  | 228.145501283 | 2 | R   | 6     | 996.464136919 |            |  |
| +0.1096961 | 357.188094379 | 3 | E   | 5     | 840.363025891 |            |  |
| +0.2238384 | 504.256508295 | 4 | F   | 4     | 711.320432795 |            |  |
|            | 671.254867113 | 5 | S   | 3     | 564.252018879 |            |  |
|            | 784.338931094 | 6 | I   | 2     | 397.25366006  | +0.0824605 |  |
| +0.0083074 | 913.38152419  | 7 | E   | 1     | 284.16959608  | -0.0436806 |  |
|            |               | 8 | K   | 0     | 155.127002984 | +0.0959432 |  |

Source: 20120601\_VR\_Bsu\_TripleSILAC\_pWTPPrkCPrpC\_F08  
 Scannumber: 9474  
 Protein: BSU11840; yjcF  
 Peptide Score: 55.04  
 Method: ITMS; CID; 3

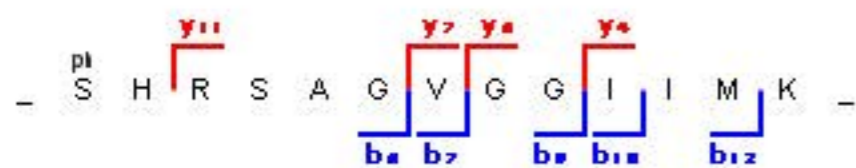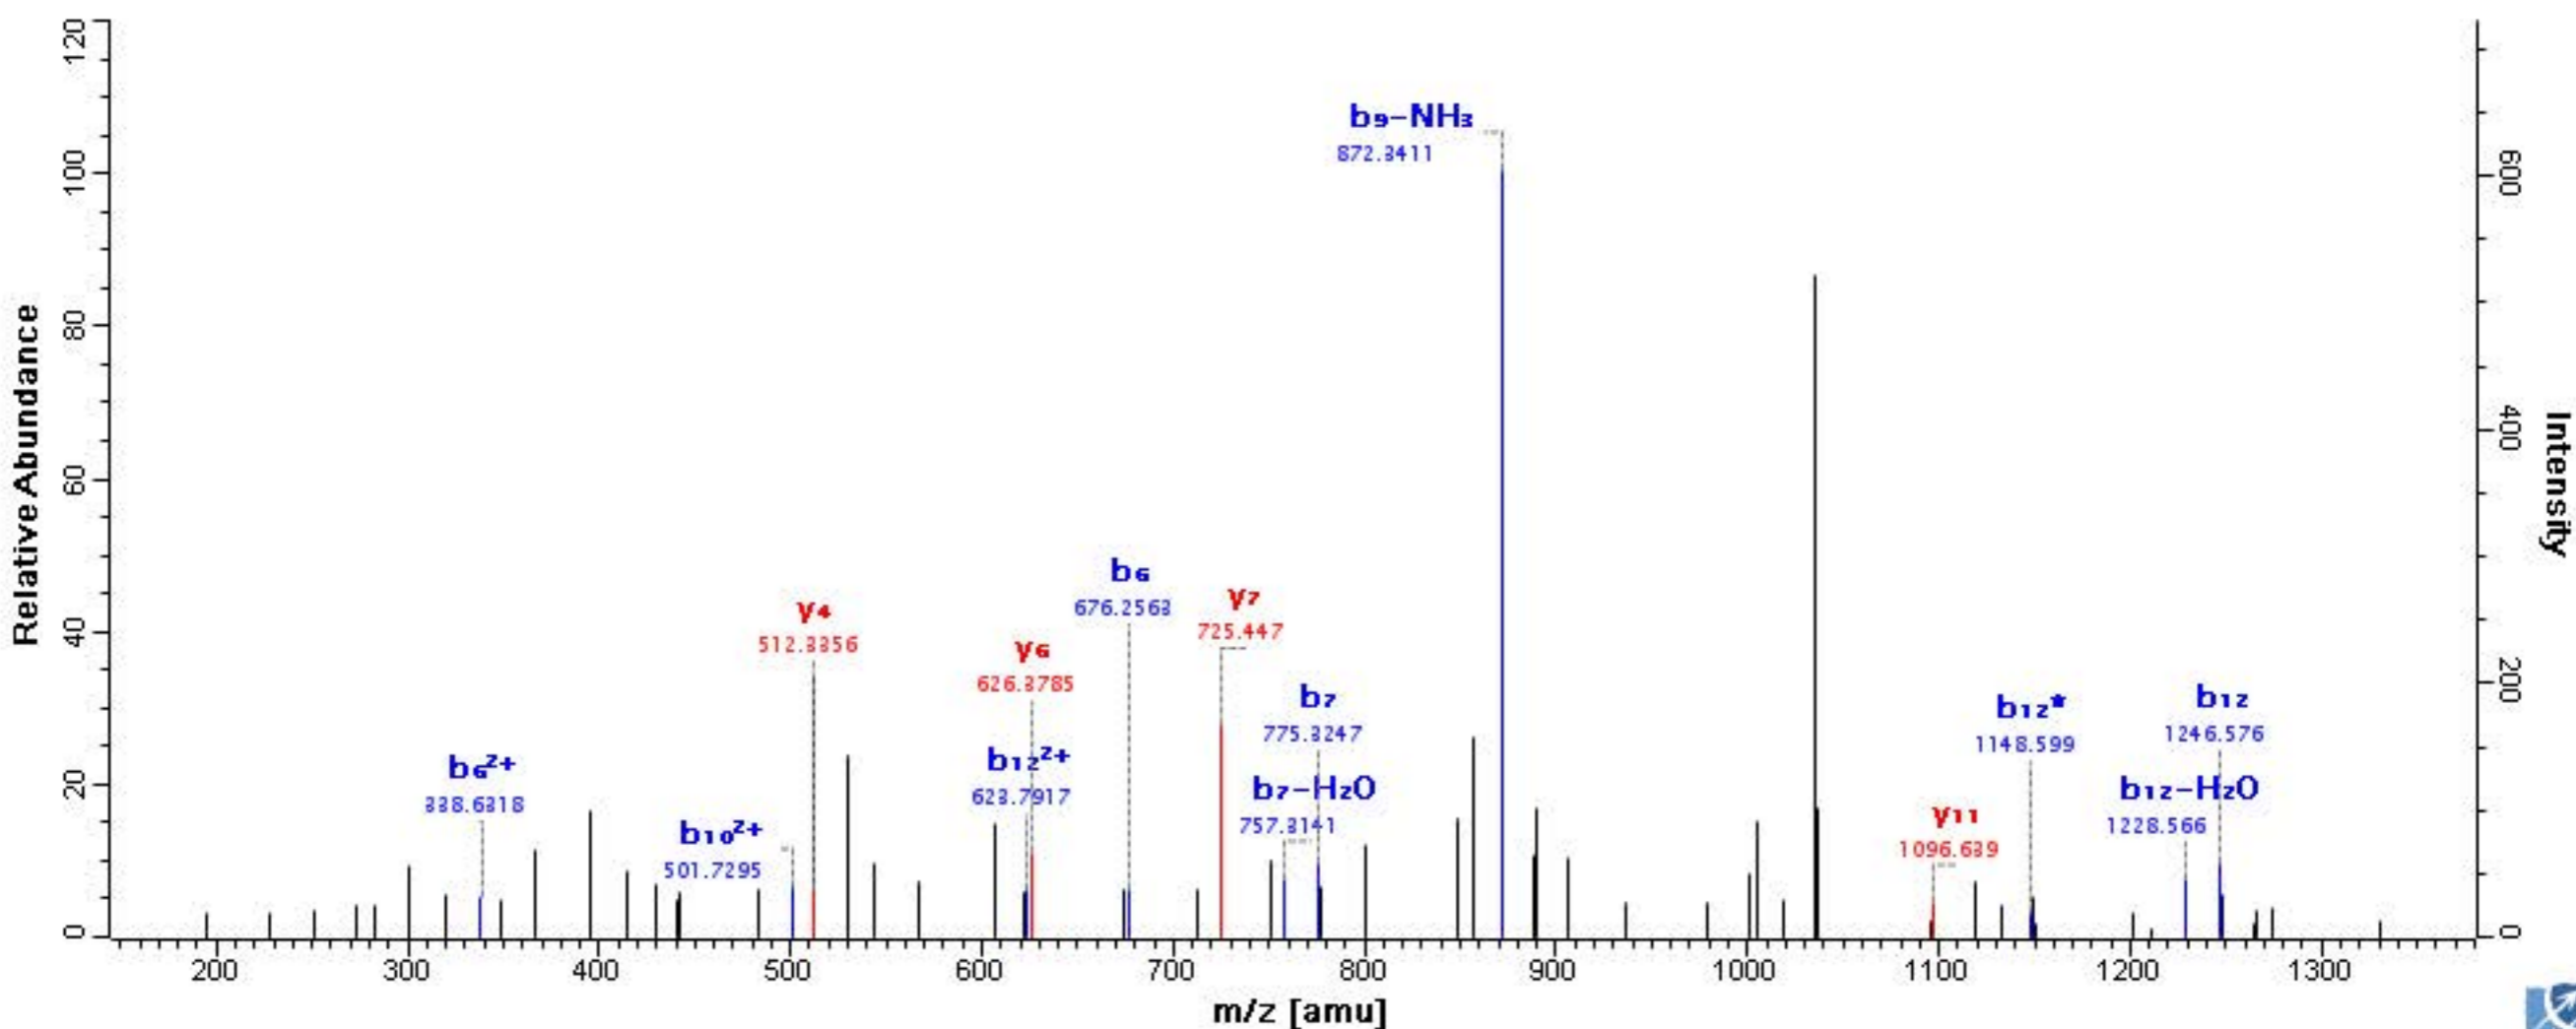

#### precursor information

|                   |                     |
|-------------------|---------------------|
| Mass:             | 1391.67334          |
| m/z:              | System.Collections. |
| Charge:           | System.Collections. |
| Retentiontime:    | System.Collections. |
| Score:            | 55.0402             |
| Mass Error [ppm]: | -0.80357            |
| PEP:              | 0.046952            |
| Precursor Type:   | MULTI               |

#### general information

|                       |           |
|-----------------------|-----------|
| Annotation:           | 7 of 13   |
| AminoAcids Coverag    | 54 %      |
| Intensity Coverage:   | 29 %      |
| Protein Localisation: | 76 ... 88 |

| b <sup>2+</sup> ion |              | b ion      |              |     | y ion |          |              |
|---------------------|--------------|------------|--------------|-----|-------|----------|--------------|
| Δ dalton            | mass         | Δ dalton   | mass         | seq |       | Δ dalton | mass         |
|                     | 168.00563528 |            | 168.00563528 | 1   | S     | 12       |              |
|                     | 305.06454715 |            | 305.06454715 | 2   | H     | 11       | 1233.6975857 |
|                     | 461.16565818 |            | 461.16565818 | 3   | R     | 10       | 1096.6386739 |
|                     | 548.19768659 |            | 548.19768659 | 4   | S     | 9        | 940.53756284 |
|                     | 619.23480037 |            | 619.23480037 | 5   | A     | 8        | 853.50553443 |
| -0.4338333          | 338.63177028 | +0.2130352 | 676.2562641  | 6   | G     | 7        | 782.46842064 |
|                     | 775.32467801 | +0.2134079 | 775.32467801 | 7   | V     | 6        | 725.44695691 |
|                     | 832.34614174 |            | 832.34614174 | 8   | G     | 5        | 626.378543   |
|                     | 889.36760546 |            | 889.36760546 | 9   | G     | 4        | 569.35707927 |
| -0.4300345          | 501.72947295 |            | 1002.4516694 | 10  | I     | 3        | 512.33561555 |
|                     | 1115.5357334 |            | 1115.5357334 | 11  | I     | 2        | 399.25155157 |
| -0.1000358          | 623.79174725 | +0.3227078 | 1246.576218  | 12  | M     | 1        | 286.16748759 |
|                     |              |            |              | 13  | K     | 0        | 155.12700298 |

Source: 20120602\_VR\_Bsu\_TripleSILAC\_pWTPPrkCPrpC\_F10  
 Scannumber: 8230  
 Protein: BSU13010; ykgB  
 Peptide Score: 75.33  
 Method: ITMS; CID; 3

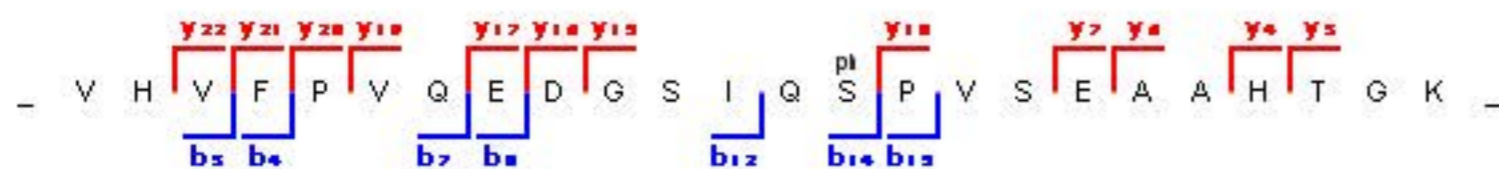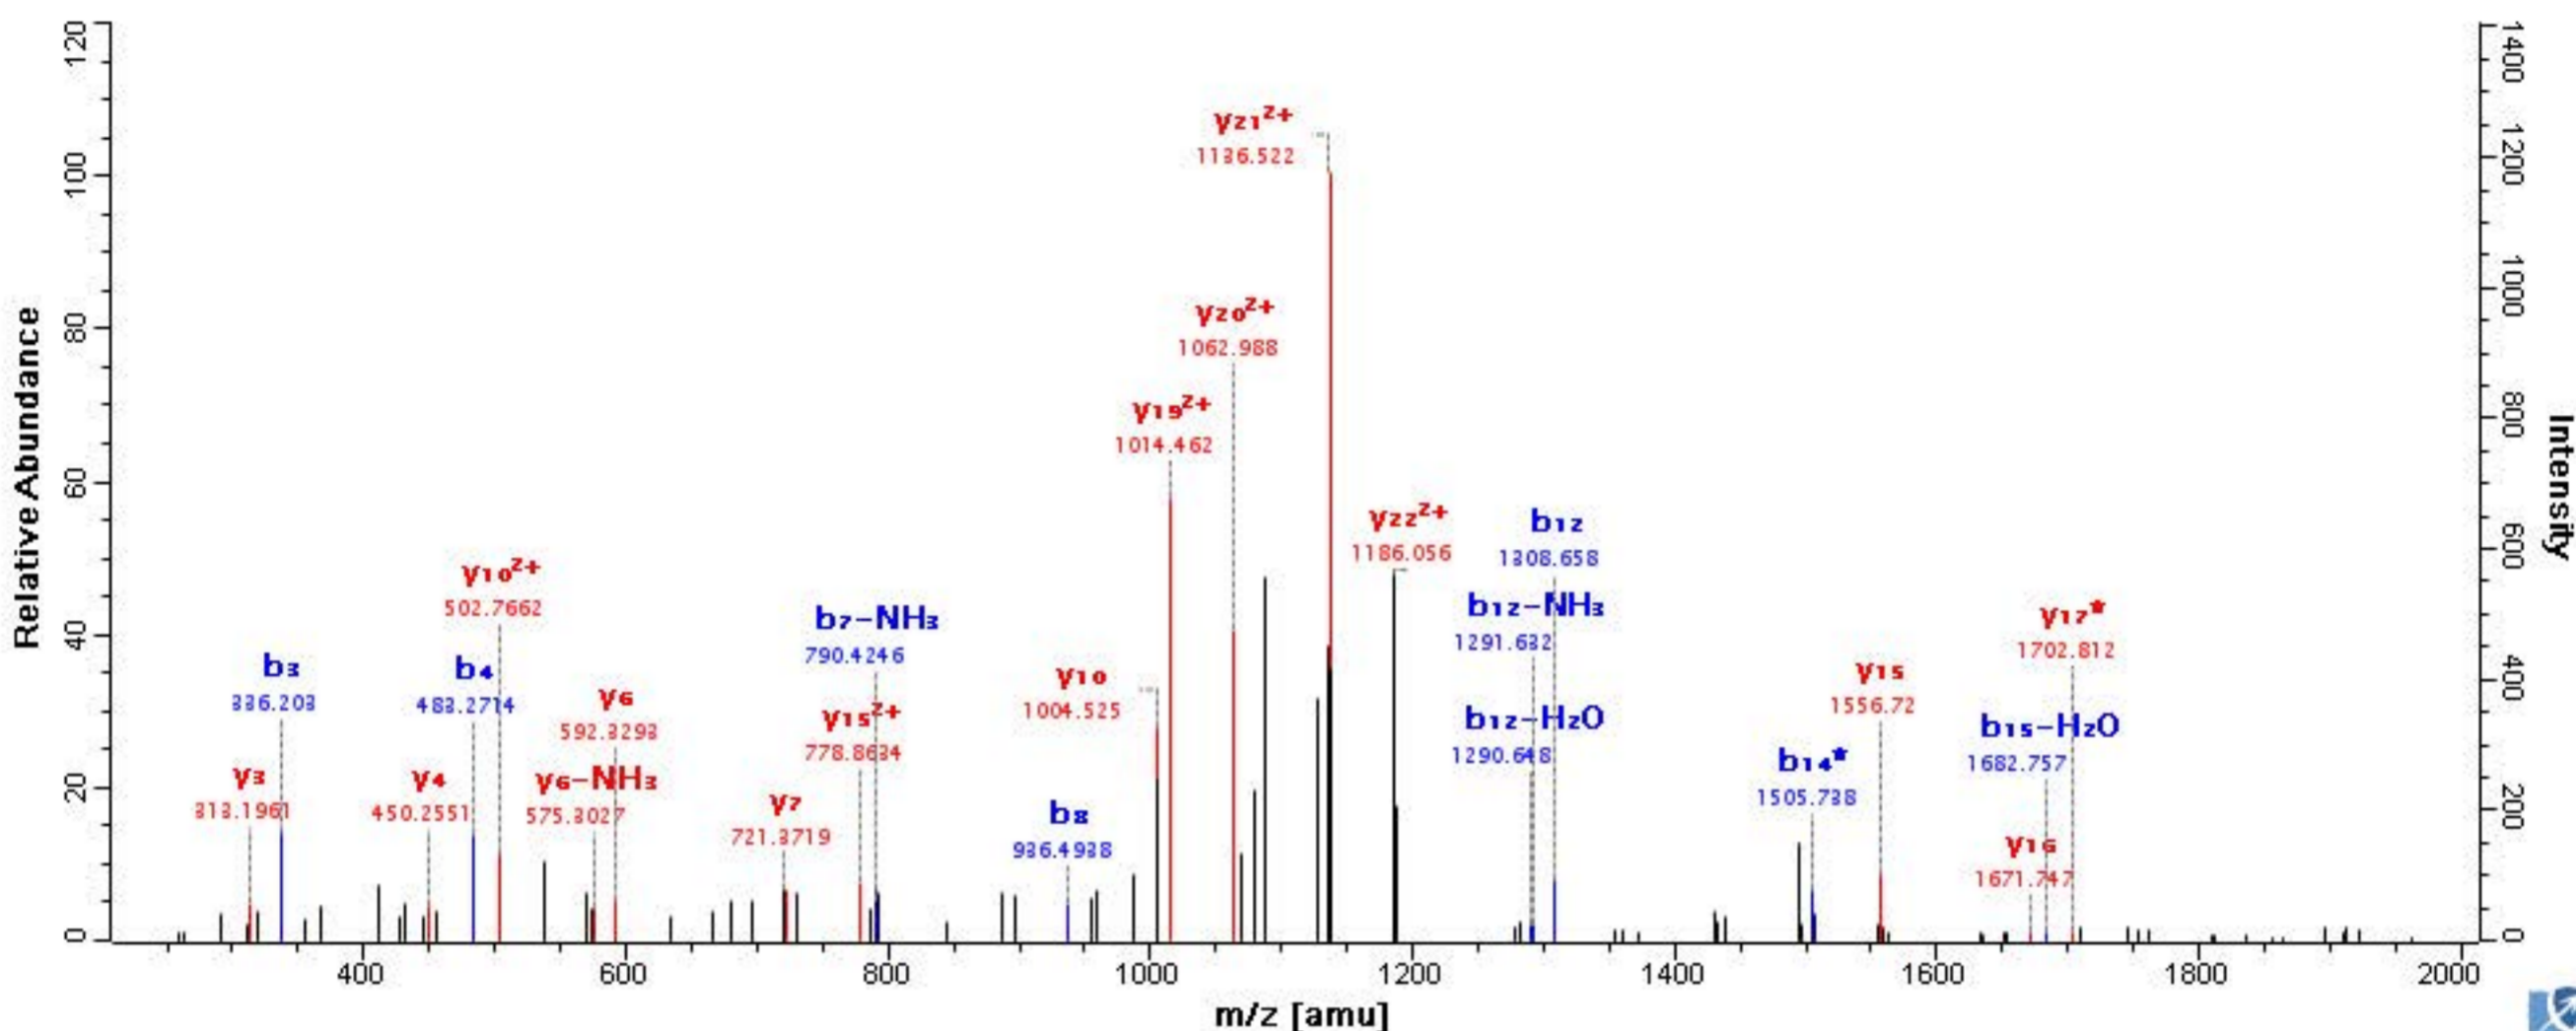

#### precursor information

|                   |                     |
|-------------------|---------------------|
| Mass:             | 2598.21105          |
| m/z:              | System.Collections. |
| Charge:           | System.Collections. |
| Retentiontime:    | System.Collections. |
| Score:            | 75.3343             |
| Mass Error [ppm]: | -0.19085            |
| PEP:              | 4.0076E-05          |
| Precursor Type:   | MULTI               |

| b ion           |              | seq |   |    | y ion           |            | y <sup>2+</sup> ion |            |
|-----------------|--------------|-----|---|----|-----------------|------------|---------------------|------------|
| $\Delta$ dalton | mass         |     |   |    | $\Delta$ dalton | mass       | $\Delta$ dalton     | mass       |
|                 | 100.07569038 | 1   | V | 23 |                 |            |                     |            |
|                 | 237.13460225 | 2   | H | 22 | 2508.1646074    |            | 2508.1646074        |            |
| +0.0940419      | 336.20301616 | 3   | V | 21 | 2371.1056956    |            | 1186.056486         | -0.1222819 |
| +0.060235       | 483.27143008 | 4   | F | 20 | 2272.0372817    |            | 1136.522791         | +0.4340198 |
|                 | 580.32419393 | 5   | P | 19 | 2124.9688677    |            | 1062.9880721        | +0.3119767 |
|                 | 679.39260785 | 6   | V | 18 | 2027.9161039    |            | 1014.4616902        | -0.0992024 |
|                 | 807.45118536 | 7   | Q | 17 | 1928.84769      |            | 1928.84769          |            |
| +0.1326864      | 936.49377845 | 8   | E | 16 | 1800.7891125    |            | 1800.7891125        |            |
|                 | 1051.5207215 | 9   | D | 15 | 1671.7465194    | +0.1453263 | 1671.7465194        |            |
|                 | 1108.5421852 | 10  | G | 14 | 1556.7195763    | -0.0688195 | 778.8634264         | +0.4263075 |
|                 | 1195.5742136 | 11  | S | 13 | 1499.6981126    |            | 1499.6981126        |            |
| +0.0673083      | 1308.6582776 | 12  | I | 12 | 1412.6660842    |            | 1412.6660842        |            |
|                 | 1436.7168551 | 13  | Q | 11 | 1299.5820202    |            | 1299.5820202        |            |
|                 | 1603.7152139 | 14  | S | 10 | 1171.5234427    |            | 1171.5234427        |            |
|                 | 1700.7679778 | 15  | P | 9  | 1004.5250839    | -0.0219711 | 502.76618018        | +0.2630557 |
|                 | 1799.8363917 | 16  | V | 8  | 907.47232004    |            | 907.47232004        |            |
|                 | 1886.8684201 | 17  | S | 7  | 808.40390613    |            | 808.40390613        |            |
|                 | 2015.9110132 | 18  | E | 6  | 721.37187772    | +0.3570652 | 721.37187772        |            |
|                 | 2086.948127  | 19  | A | 5  | 592.32928462    | +0.050232  | 592.32928462        |            |
|                 | 2157.9852408 | 20  | A | 4  | 521.29217083    |            | 521.29217083        |            |
|                 | 2295.0441526 | 21  | H | 3  | 450.25505704    | +0.0357755 | 450.25505704        |            |
|                 | 2396.0918311 | 22  | T | 2  | 313.19614518    | +0.1785496 | 313.19614518        |            |
|                 | 2453.1132948 | 23  | G | 1  | 212.14846671    |            | 212.14846671        |            |
|                 |              | 24  | K | 0  | 155.12700298    |            | 155.12700298        |            |

#### general information

|                       |             |
|-----------------------|-------------|
| Annotation:           | 15 of 24    |
| AminoAcids Coverag    | 62 %        |
| Intensity Coverage:   | 43 %        |
| Protein Localisation: | 114 ... 137 |

Source: 20120602\_VR\_Bsu\_TripleSILAC\_pWTPPrkCPrpC\_F16  
 Scannumber: 2557  
 Protein: BSU25020; sodA; yggD  
 Peptide Score: 165.63  
 Method: ITMS; CID; 3

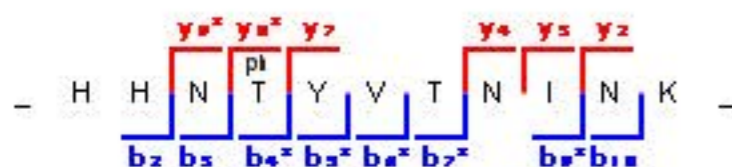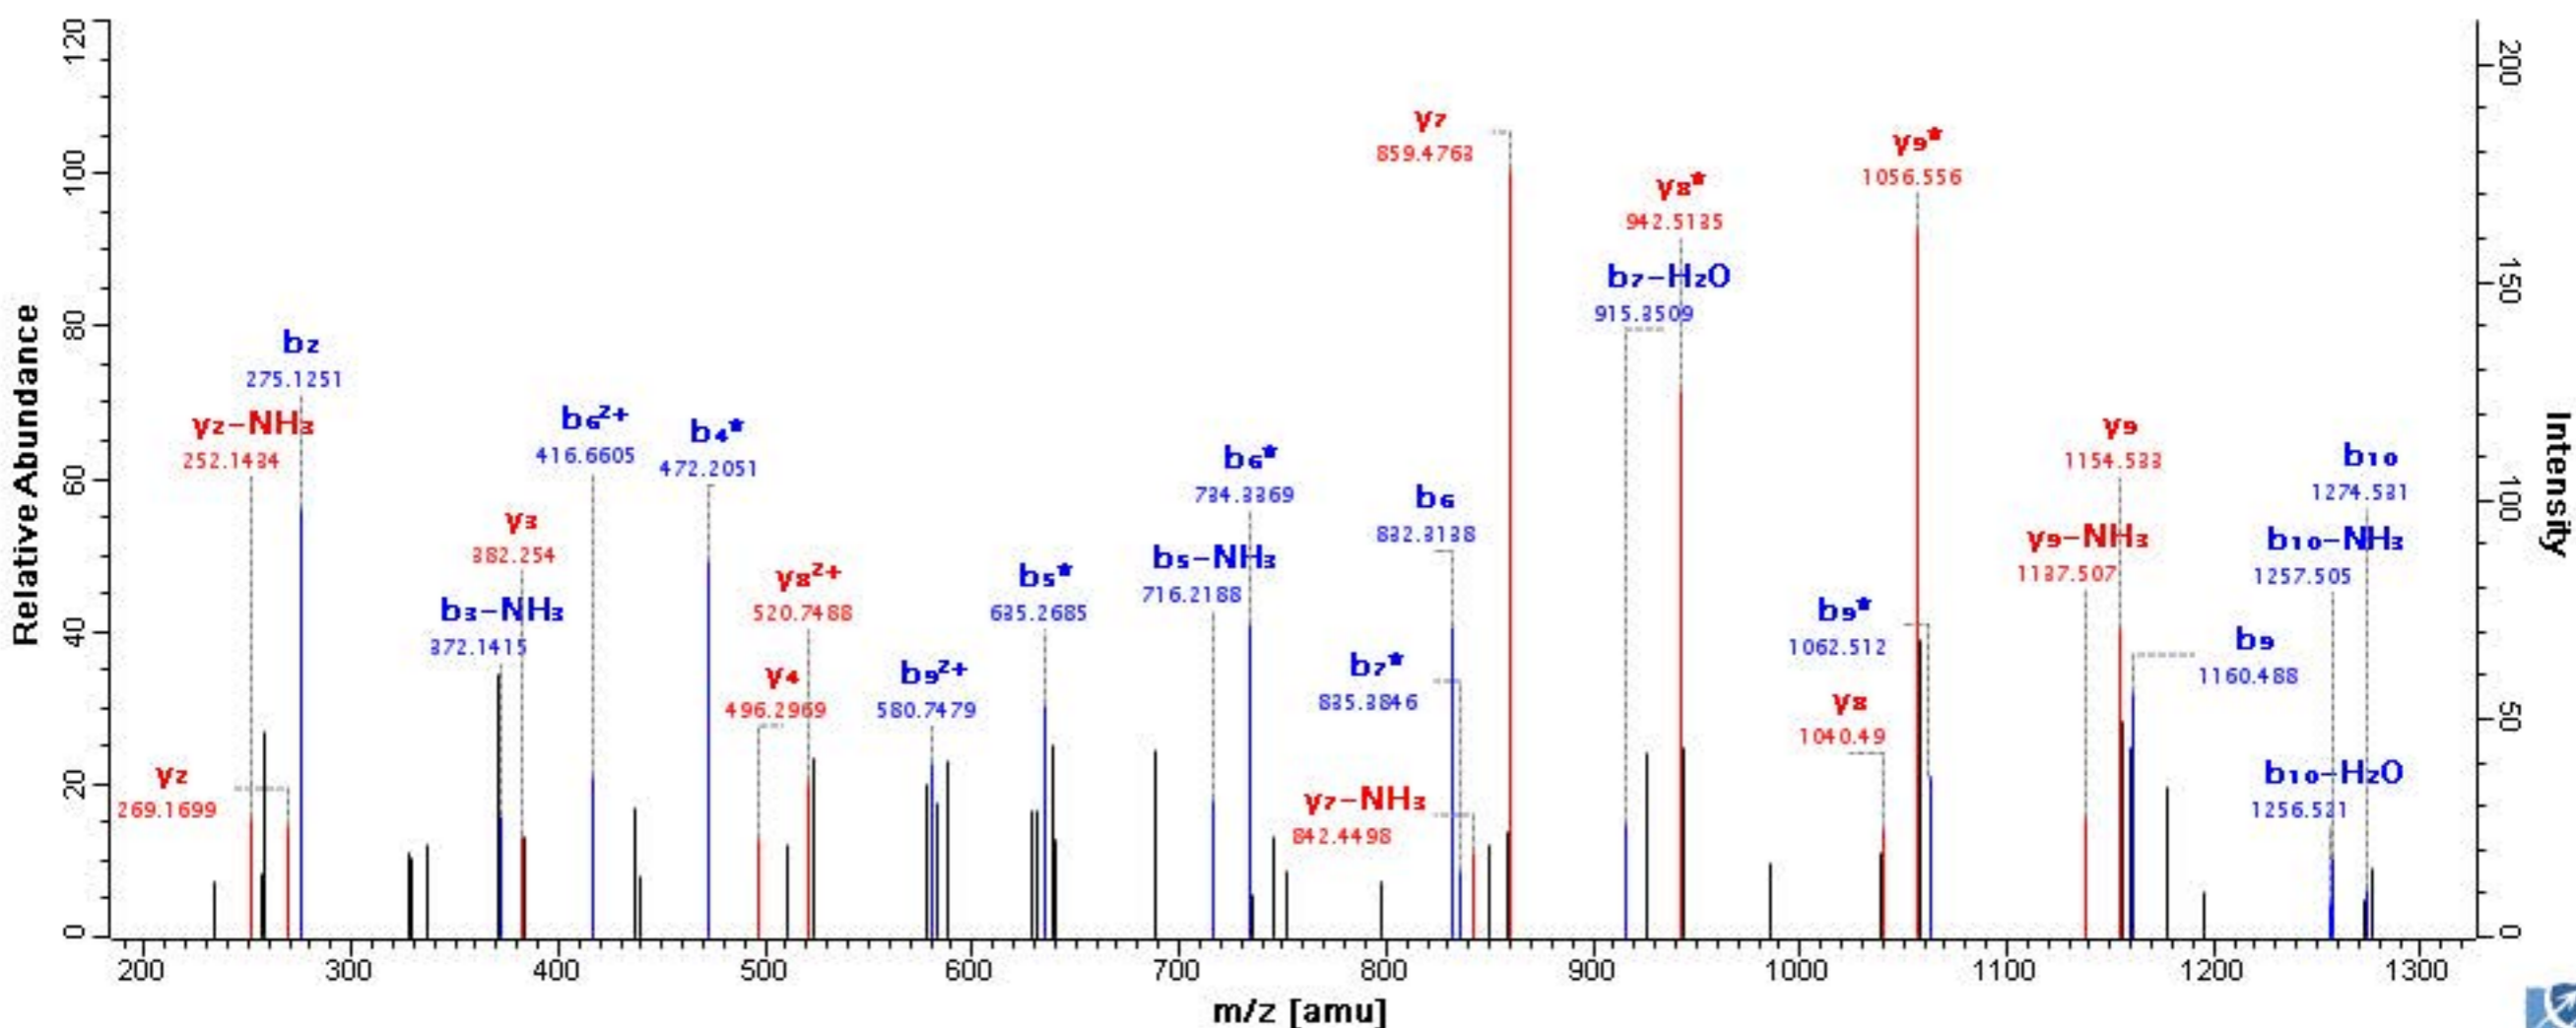

#### precursor information

|                   |                     |
|-------------------|---------------------|
| Mass:             | 1419.62978          |
| m/z:              | System.Collections. |
| Charge:           | System.Collections. |
| Retentiontime:    | System.Collections. |
| Score:            | 165.6312            |
| Mass Error [ppm]: | 0.10778             |
| PEP:              | 2.7828E-22          |
| Precursor Type:   | MULTI               |

#### general information

|                       |           |
|-----------------------|-----------|
| Annotation:           | 9 of 11   |
| AminoAcids Coverag    | 82 %      |
| Intensity Coverage:   | 57 %      |
| Protein Localisation: | 31 ... 41 |

| b <sup>2+</sup> ion |          | b ion     |          |     | y ion |          |          | y <sup>2+</sup> ion |          |           |
|---------------------|----------|-----------|----------|-----|-------|----------|----------|---------------------|----------|-----------|
| Δ dalton            | mass     | Δ dalton  | mass     | seq |       | Δ dalton | mass     | Δ dalton            | mass     |           |
|                     | 138.0662 |           | 138.0662 | 1   | H     | 10       |          |                     |          |           |
|                     | 275.1251 | +0.229667 | 275.1251 | 2   | H     | 9        | 1291.592 |                     | 1291.592 |           |
|                     | 389.168  |           | 389.168  | 3   | N     | 8        | 1154.533 | +0.098191           | 1154.533 |           |
|                     | 570.182  |           | 570.182  | 4   | T     | 7        | 1040.49  | +0.380742           | 520.7488 | -0.333531 |
|                     | 733.2454 |           | 733.2454 | 5   | Y     | 6        | 859.4763 | +0.0203             | 859.4763 |           |
| +0.12945            | 416.6605 | +0.094241 | 832.3138 | 6   | V     | 5        | 696.413  |                     | 696.413  |           |
|                     | 933.3615 |           | 933.3615 | 7   | T     | 4        | 597.3446 |                     | 597.3446 |           |
|                     | 1047.404 |           | 1047.404 | 8   | N     | 3        | 496.2969 | +0.184096           | 496.2969 |           |
| -0.390197           | 580.7479 | +0.339188 | 1160.488 | 9   | I     | 2        | 382.254  | +0.132541           | 382.254  |           |
|                     | 1274.531 | -0.055058 | 1274.531 | 10  | N     | 1        | 269.1699 | +0.146995           | 269.1699 |           |
|                     |          |           |          | 11  | K     | 0        | 155.127  |                     | 155.127  |           |

Source: 201 20602\_VR\_Bsu\_TripleSILAC\_pWTPPrkCPrpC\_F20  
 Scannumber: 11318  
 Protein: ahpC; BSU40090  
 Peptide Score: 80.54  
 Method: ITMS; CID; 3

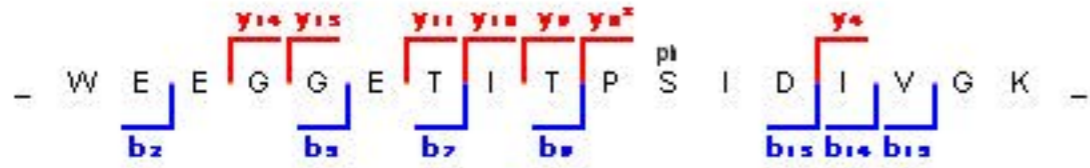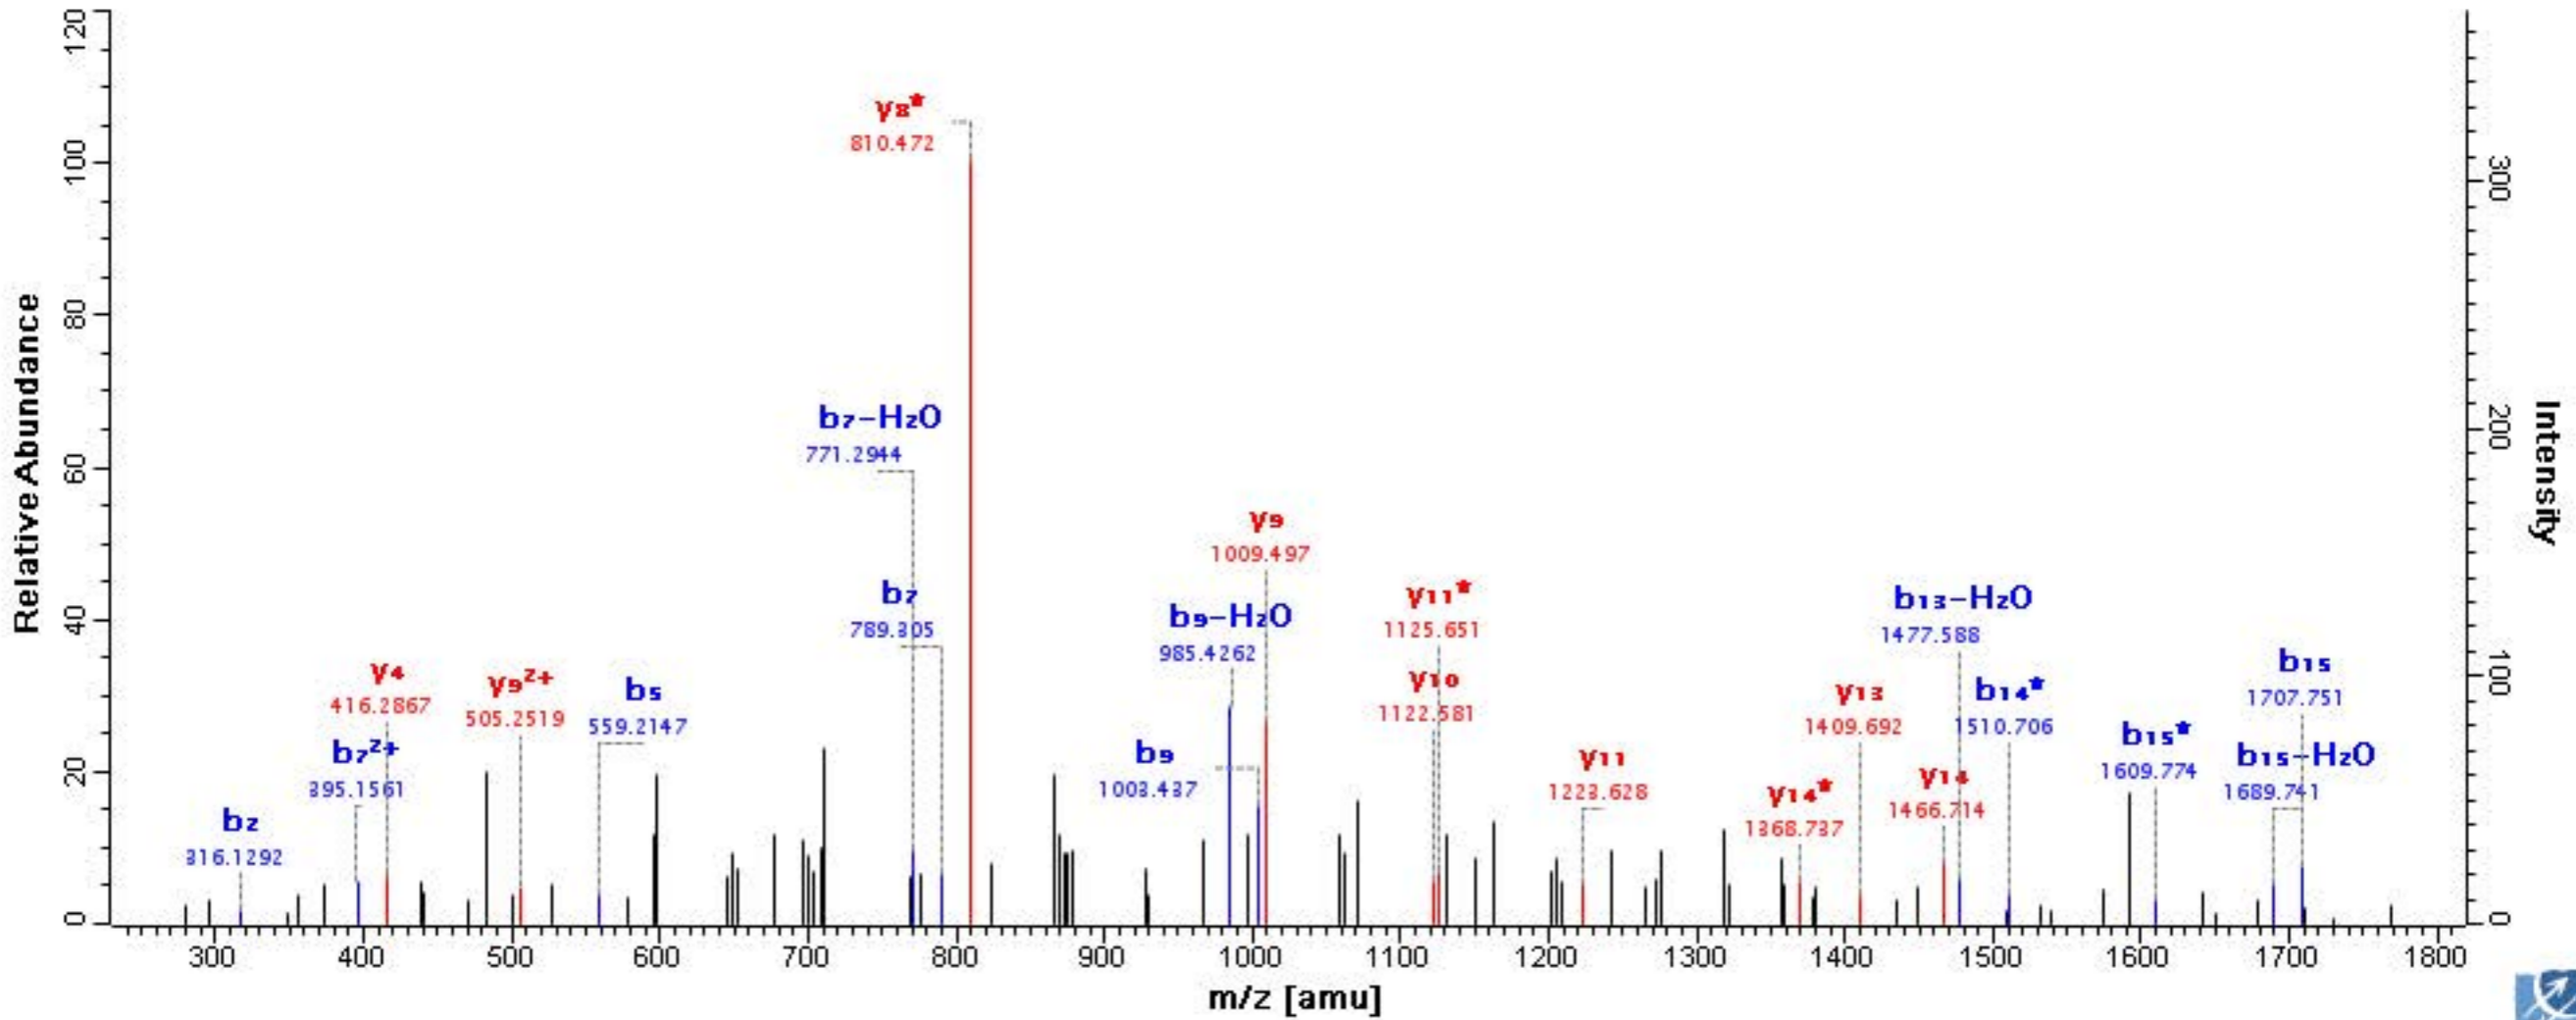

**precursor information**

|                   |                     |
|-------------------|---------------------|
| Mass:             | 1909.87035          |
| m/z:              | System.Collections. |
| Charge:           | System.Collections. |
| Retentiontime:    | System.Collections. |
| Score:            | 80.54491            |
| Mass Error [ppm]: | -0.36322            |
| PEP:              | 6.8224E-05          |
| Precursor Type:   | MULTI               |

| b <sup>2+</sup> ion |          | b ion     |          | seq |   |    | y ion    |           | y <sup>2+</sup> ion |           |
|---------------------|----------|-----------|----------|-----|---|----|----------|-----------|---------------------|-----------|
| Δ dalton            | mass     | Δ dalton  | mass     |     |   |    | Δ dalton | mass      | Δ dalton            | mass      |
|                     | 187.0866 |           | 187.0866 | 1   | W | 16 |          |           |                     |           |
|                     | 316.1292 | +0.178435 | 316.1292 | 2   | E | 15 | 1724.799 |           | 1724.799            |           |
|                     | 445.1718 |           | 445.1718 | 3   | E | 14 | 1595.756 |           | 1595.756            |           |
|                     | 502.1932 |           | 502.1932 | 4   | G | 13 | 1466.714 | +0.171681 | 1466.714            |           |
|                     | 559.2147 | +0.195514 | 559.2147 | 5   | G | 12 | 1409.692 | +0.145415 | 1409.692            |           |
|                     | 688.2573 |           | 688.2573 | 6   | E | 11 | 1352.671 |           | 1352.671            |           |
| +0.346713           | 395.1561 | +0.165301 | 789.305  | 7   | T | 10 | 1223.628 | +0.067871 | 1223.628            |           |
|                     | 902.389  |           | 902.389  | 8   | I | 9  | 1122.581 | +0.223093 | 1122.581            |           |
|                     | 1003.437 | -0.045787 | 1003.437 | 9   | T | 8  | 1009.497 | +0.122098 | 505.2519            | -0.217491 |
|                     | 1100.489 |           | 1100.489 | 10  | P | 7  | 908.4489 |           | 908.4489            |           |
|                     | 1267.488 |           | 1267.488 | 11  | S | 6  | 811.3961 |           | 811.3961            |           |
|                     | 1380.572 |           | 1380.572 | 12  | I | 5  | 644.3978 |           | 644.3978            |           |
|                     | 1495.599 |           | 1495.599 | 13  | D | 4  | 531.3137 |           | 531.3137            |           |
|                     | 1608.683 |           | 1608.683 | 14  | I | 3  | 416.2867 | +0.24072  | 416.2867            |           |
|                     | 1707.751 | +0.384051 | 1707.751 | 15  | V | 2  | 303.2027 |           | 303.2027            |           |
|                     | 1764.773 |           | 1764.773 | 16  | G | 1  | 204.1343 |           | 204.1343            |           |
|                     |          |           |          | 17  | K | 0  | 147.1128 |           | 147.1128            |           |

**general information**

|                       |             |
|-----------------------|-------------|
| Annotation:           | 10 of 17    |
| AminoAcids Coverag    | 59 %        |
| Intensity Coverage:   | 34 %        |
| Protein Localisation: | 170 ... 186 |

Source: 20120602\_VR\_Bsu\_TripleSILAC\_pWTPPrkCPrpC\_F20  
 Scannumber: 11511  
 Protein: ahpF; BSU40100; ndh  
 Peptide Score: 171.29  
 Method: ITMS; CID; 3

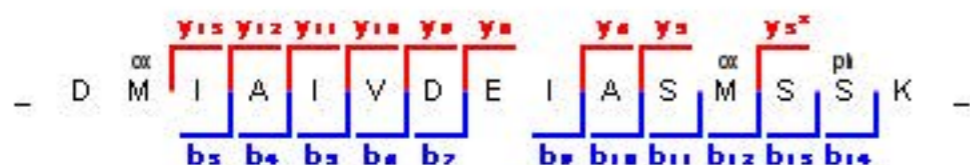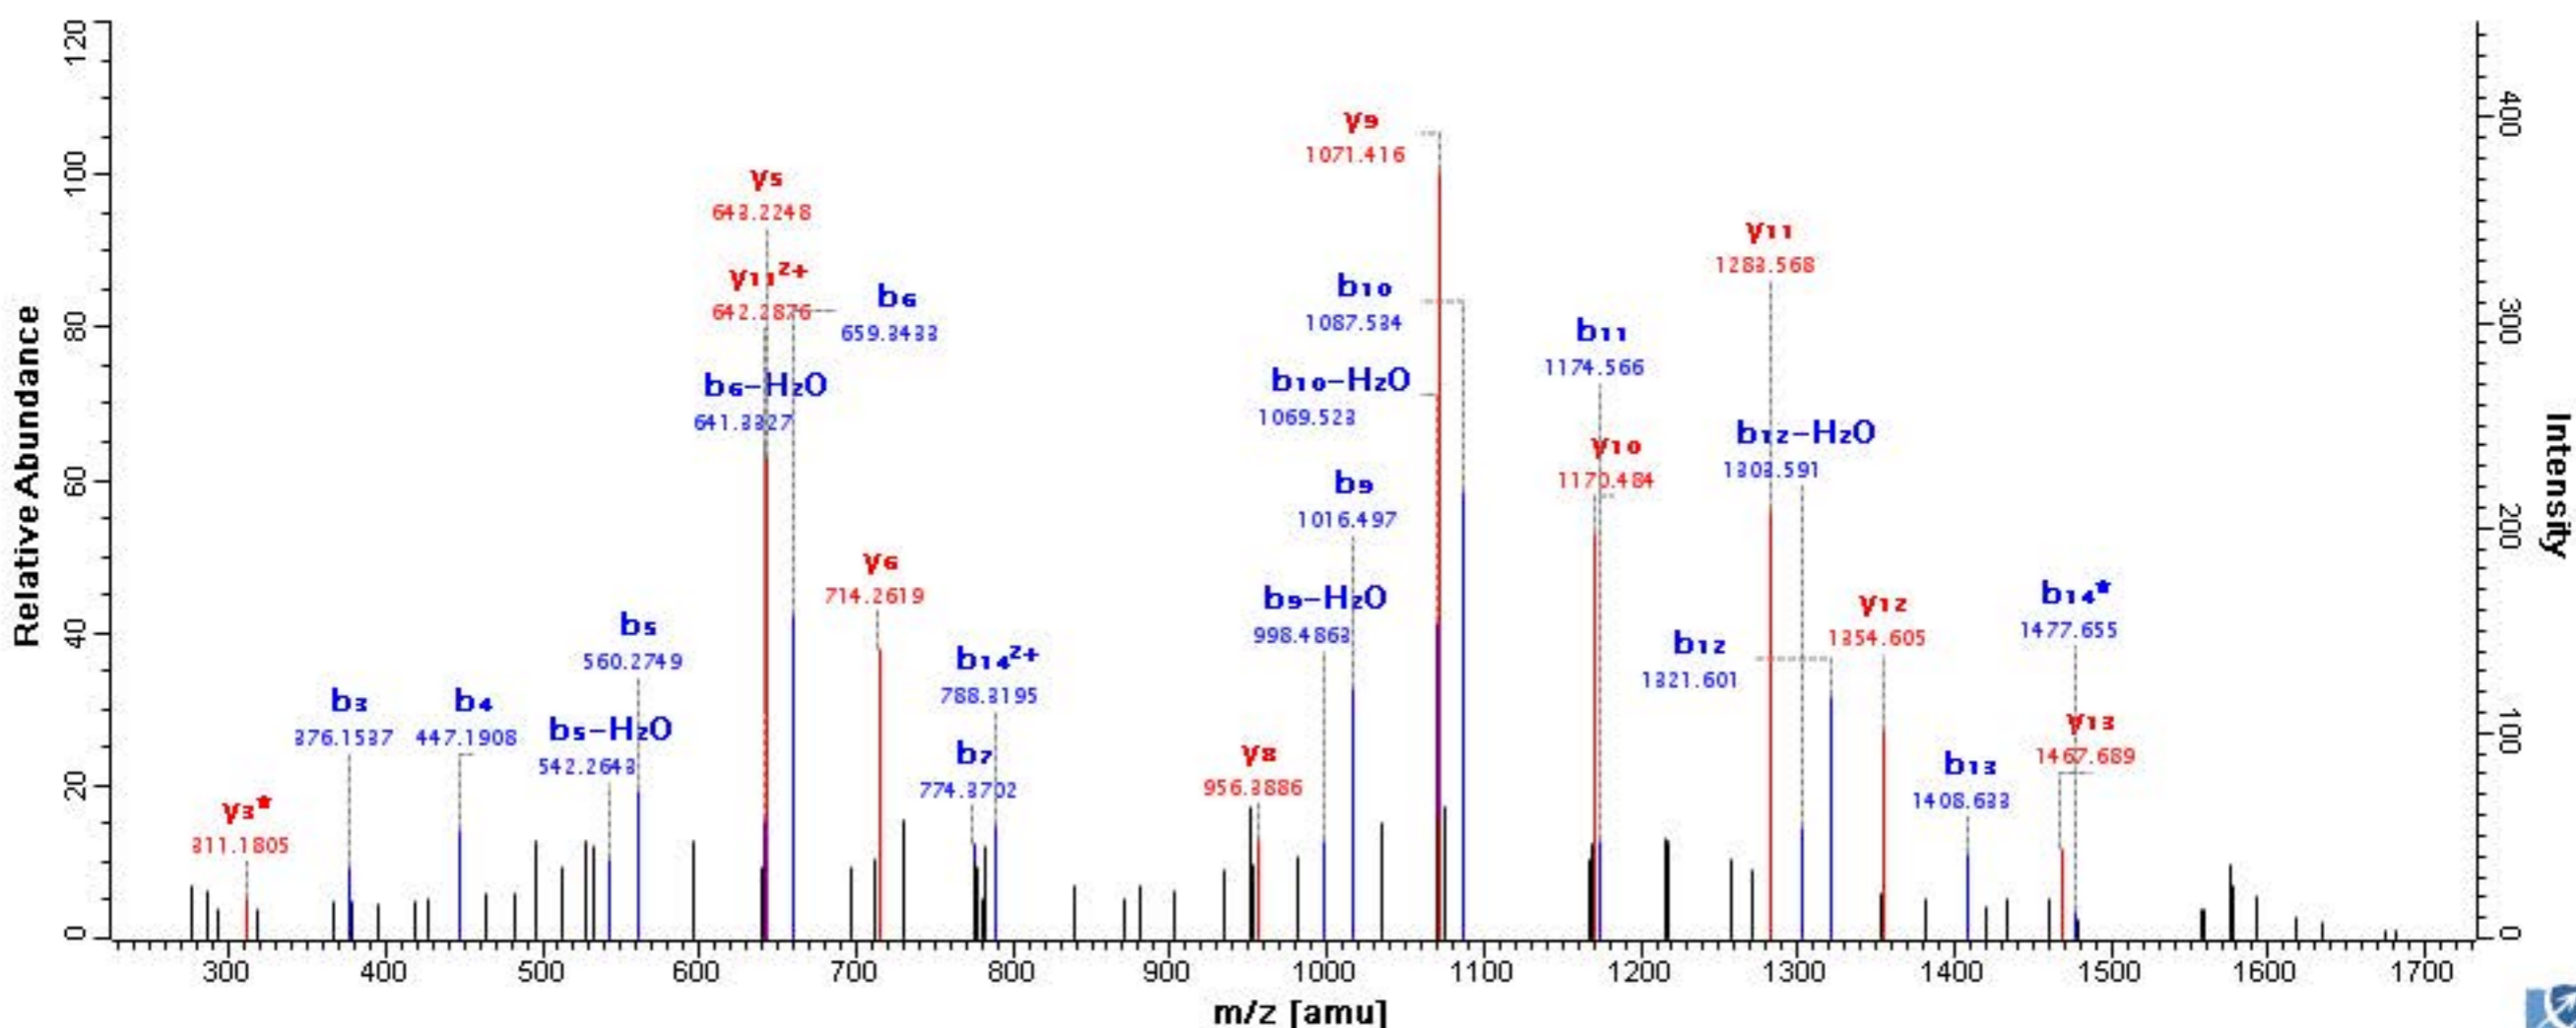

#### precursor information

|                   |                     |
|-------------------|---------------------|
| Mass:             | 1720.73097          |
| m/z:              | System.Collections. |
| Charge:           | System.Collections. |
| Retentiontime:    | System.Collections. |
| Score:            | 171.288             |
| Mass Error [ppm]: | 0.53109             |
| PEP:              | 1.5262E-33          |
| Precursor Type:   | MULTI               |

| b <sup>2+</sup> ion |          | b ion     |          |     | y ion |          | y <sup>2+</sup> ion |           |          |          |
|---------------------|----------|-----------|----------|-----|-------|----------|---------------------|-----------|----------|----------|
| Δ dalton            | mass     | Δ dalton  | mass     | seq |       | Δ dalton | mass                | Δ dalton  | mass     |          |
|                     | 116.0342 |           | 116.0342 | 1   | D     | 14       |                     |           |          |          |
|                     | 263.0696 |           | 263.0696 | 2   | M     | 13       | 1614.725            |           | 1614.725 |          |
|                     | 376.1537 | +0.07169  | 376.1537 | 3   | I     | 12       | 1467.689            | +0.230734 | 1467.689 |          |
|                     | 447.1908 | +0.005432 | 447.1908 | 4   | A     | 11       | 1354.605            | +0.240702 | 1354.605 |          |
|                     | 560.2749 | +0.054058 | 560.2749 | 5   | I     | 10       | 1283.568            | +0.069319 | 642.2876 | +0.27089 |
|                     | 659.3433 | -0.007398 | 659.3433 | 6   | V     | 9        | 1170.484            | +0.135195 | 1170.484 |          |
|                     | 774.3702 | +0.387168 | 774.3702 | 7   | D     | 8        | 1071.416            | -0.022954 | 1071.416 |          |
|                     | 903.4128 |           | 903.4128 | 8   | E     | 7        | 956.3886            | +0.109885 | 956.3886 |          |
|                     | 1016.497 | -0.042712 | 1016.497 | 9   | I     | 6        | 827.346             |           | 827.346  |          |
|                     | 1087.534 | -0.011405 | 1087.534 | 10  | A     | 5        | 714.2619            | +0.229279 | 714.2619 |          |
|                     | 1174.566 | -0.008644 | 1174.566 | 11  | S     | 4        | 643.2248            | +0.120885 | 643.2248 |          |
|                     | 1321.601 | +0.064966 | 1321.601 | 12  | M     | 3        | 556.1928            |           | 556.1928 |          |
|                     | 1408.633 | +0.447    | 1408.633 | 13  | S     | 2        | 409.1574            |           | 409.1574 |          |
| +0.396952           | 788.3195 |           | 1575.632 | 14  | S     | 1        | 322.1254            |           | 322.1254 |          |
|                     |          |           |          | 15  | K     | 0        | 155.127             |           | 155.127  |          |

#### general information

|                       |           |
|-----------------------|-----------|
| Annotation:           | 12 of 15  |
| AminoAcids Coverag    | 80 %      |
| Intensity Coverage:   | 62 %      |
| Protein Localisation: | 36 ... 50 |



Source: 20120602\_VR\_Bsu\_TriplesILAC\_pWTPPrkPrpC\_F20  
 Scannumber: 12189  
 Protein: BSU07710; Ita52; yfE  
 Peptide Score: 77.69  
 Method: ITMS; CID; 3

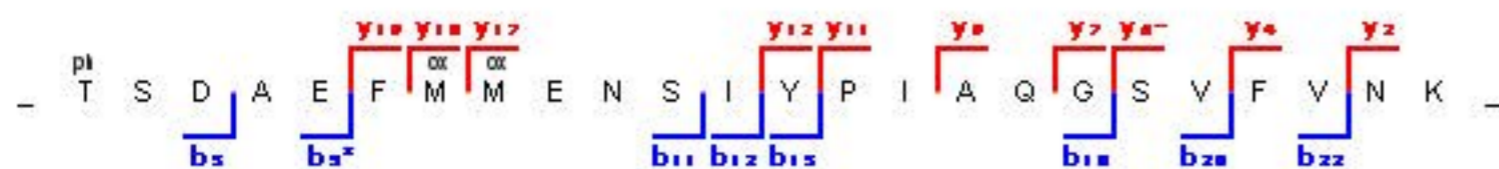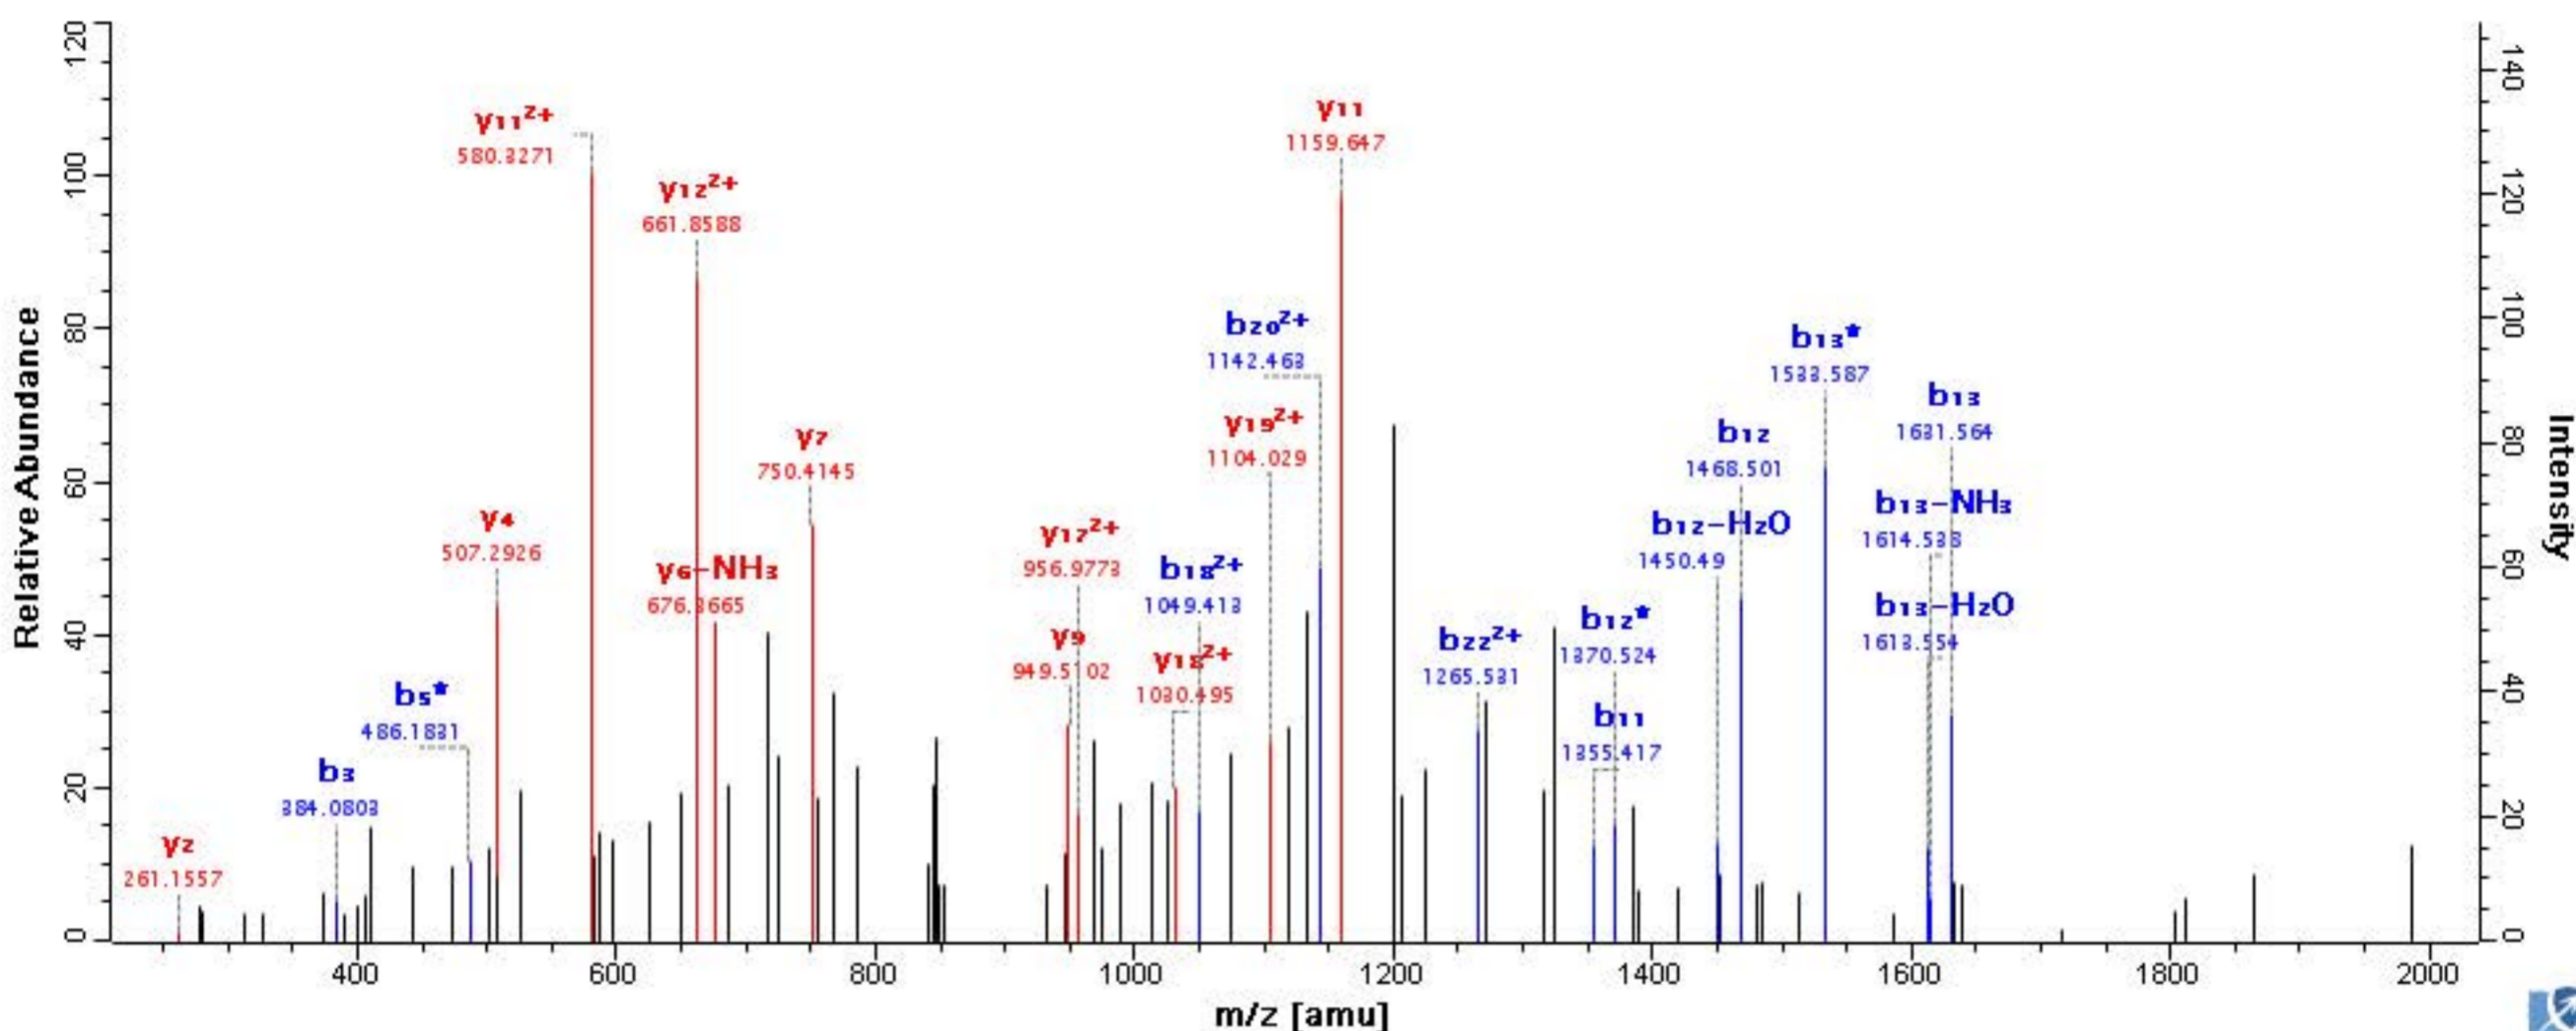

#### precursor information

|                   |                     |
|-------------------|---------------------|
| Mass:             | 2789.19709          |
| m/z:              | System.Collections. |
| Charge:           | System.Collections. |
| Retentiontime:    | System.Collections. |
| Score:            | 77.689              |
| Mass Error [ppm]: | 0.19417             |
| PEP:              | 4.2175E-05          |
| Precursor Type:   | MULTI               |

| b <sup>2+</sup> ion |          | b ion     |          | seq |   |    | y ion    |           | y <sup>2+</sup> ion |           |
|---------------------|----------|-----------|----------|-----|---|----|----------|-----------|---------------------|-----------|
| Δ dalton            | mass     | Δ dalton  | mass     |     |   |    | Δ dalton | mass      | Δ dalton            | mass      |
|                     | 182.0213 |           | 182.0213 | 1   | T | 23 |          |           |                     |           |
|                     | 269.0533 |           | 269.0533 | 2   | S | 22 | 2609.19  |           | 2609.19             |           |
|                     | 384.0803 | +0.094243 | 384.0803 | 3   | D | 21 | 2522.158 |           | 2522.158            |           |
|                     | 455.1174 |           | 455.1174 | 4   | A | 20 | 2407.131 |           | 2407.131            |           |
|                     | 584.16   |           | 584.16   | 5   | E | 19 | 2336.094 |           | 2336.094            |           |
|                     | 731.2284 |           | 731.2284 | 6   | F | 18 | 2207.051 |           | 1104.029            | +0.165861 |
|                     | 878.2638 |           | 878.2638 | 7   | M | 17 | 2059.983 |           | 1030.495            | +0.319453 |
|                     | 1025.299 |           | 1025.299 | 8   | M | 16 | 1912.947 |           | 956.9773            | +0.357965 |
|                     | 1154.342 |           | 1154.342 | 9   | E | 15 | 1765.912 |           | 1765.912            |           |
|                     | 1268.385 |           | 1268.385 | 10  | N | 14 | 1636.869 |           | 1636.869            |           |
|                     | 1355.417 | -0.461403 | 1355.417 | 11  | S | 13 | 1522.826 |           | 1522.826            |           |
|                     | 1468.501 | +0.081486 | 1468.501 | 12  | I | 12 | 1435.794 |           | 1435.794            |           |
|                     | 1631.564 | +0.10788  | 1631.564 | 13  | Y | 11 | 1322.71  |           | 661.8588            | +0.029328 |
|                     | 1728.617 |           | 1728.617 | 14  | P | 10 | 1159.647 | +0.101306 | 580.3271            | +0.273394 |
|                     | 1841.701 |           | 1841.701 | 15  | I | 9  | 1062.594 |           | 1062.594            |           |
|                     | 1912.738 |           | 1912.738 | 16  | A | 8  | 949.5102 | -0.016199 | 949.5102            |           |
|                     | 2040.797 |           | 2040.797 | 17  | Q | 7  | 878.473  |           | 878.473             |           |
| -0.15805            | 1049.413 |           | 2097.818 | 18  | G | 6  | 750.4145 | +0.288537 | 750.4145            |           |
|                     | 2184.85  |           | 2184.85  | 19  | S | 5  | 693.393  |           | 693.393             |           |
| +0.325054           | 1142.463 |           | 2283.919 | 20  | V | 4  | 606.361  |           | 606.361             |           |
|                     | 2430.987 |           | 2430.987 | 21  | F | 3  | 507.2926 | +0.068463 | 507.2926            |           |
| -0.24458            | 1265.531 |           | 2530.055 | 22  | V | 2  | 360.2241 |           | 360.2241            |           |
|                     | 2644.098 |           | 2644.098 | 23  | N | 1  | 261.1557 | +0.051391 | 261.1557            |           |
|                     |          |           |          | 24  | K | 0  | 147.1128 |           | 147.1128            |           |

#### general information

|                       |             |
|-----------------------|-------------|
| Annotation:           | 16 of 24    |
| AminoAcids Coverag    | 67 %        |
| Intensity Coverage:   | 46 %        |
| Protein Localisation: | 297 ... 320 |

Source: 20120602\_VR\_Bsu\_TripleSILAC\_pWTPPrkPrpC\_F20  
 Scannumber: 12834  
 Protein: BSU07260; Ita51; yfml  
 Peptide Score: 108.57  
 Method: ITMS; CID; 3

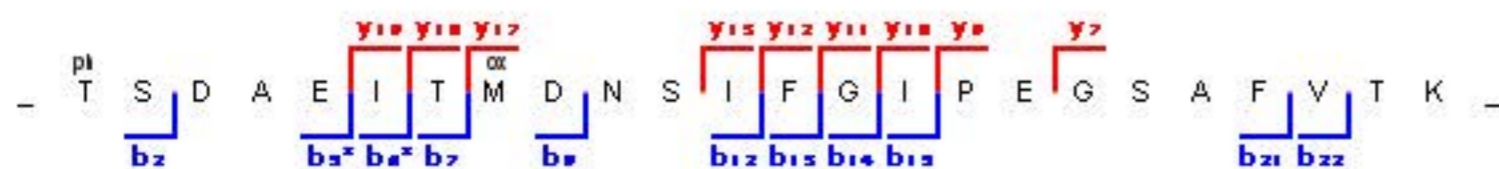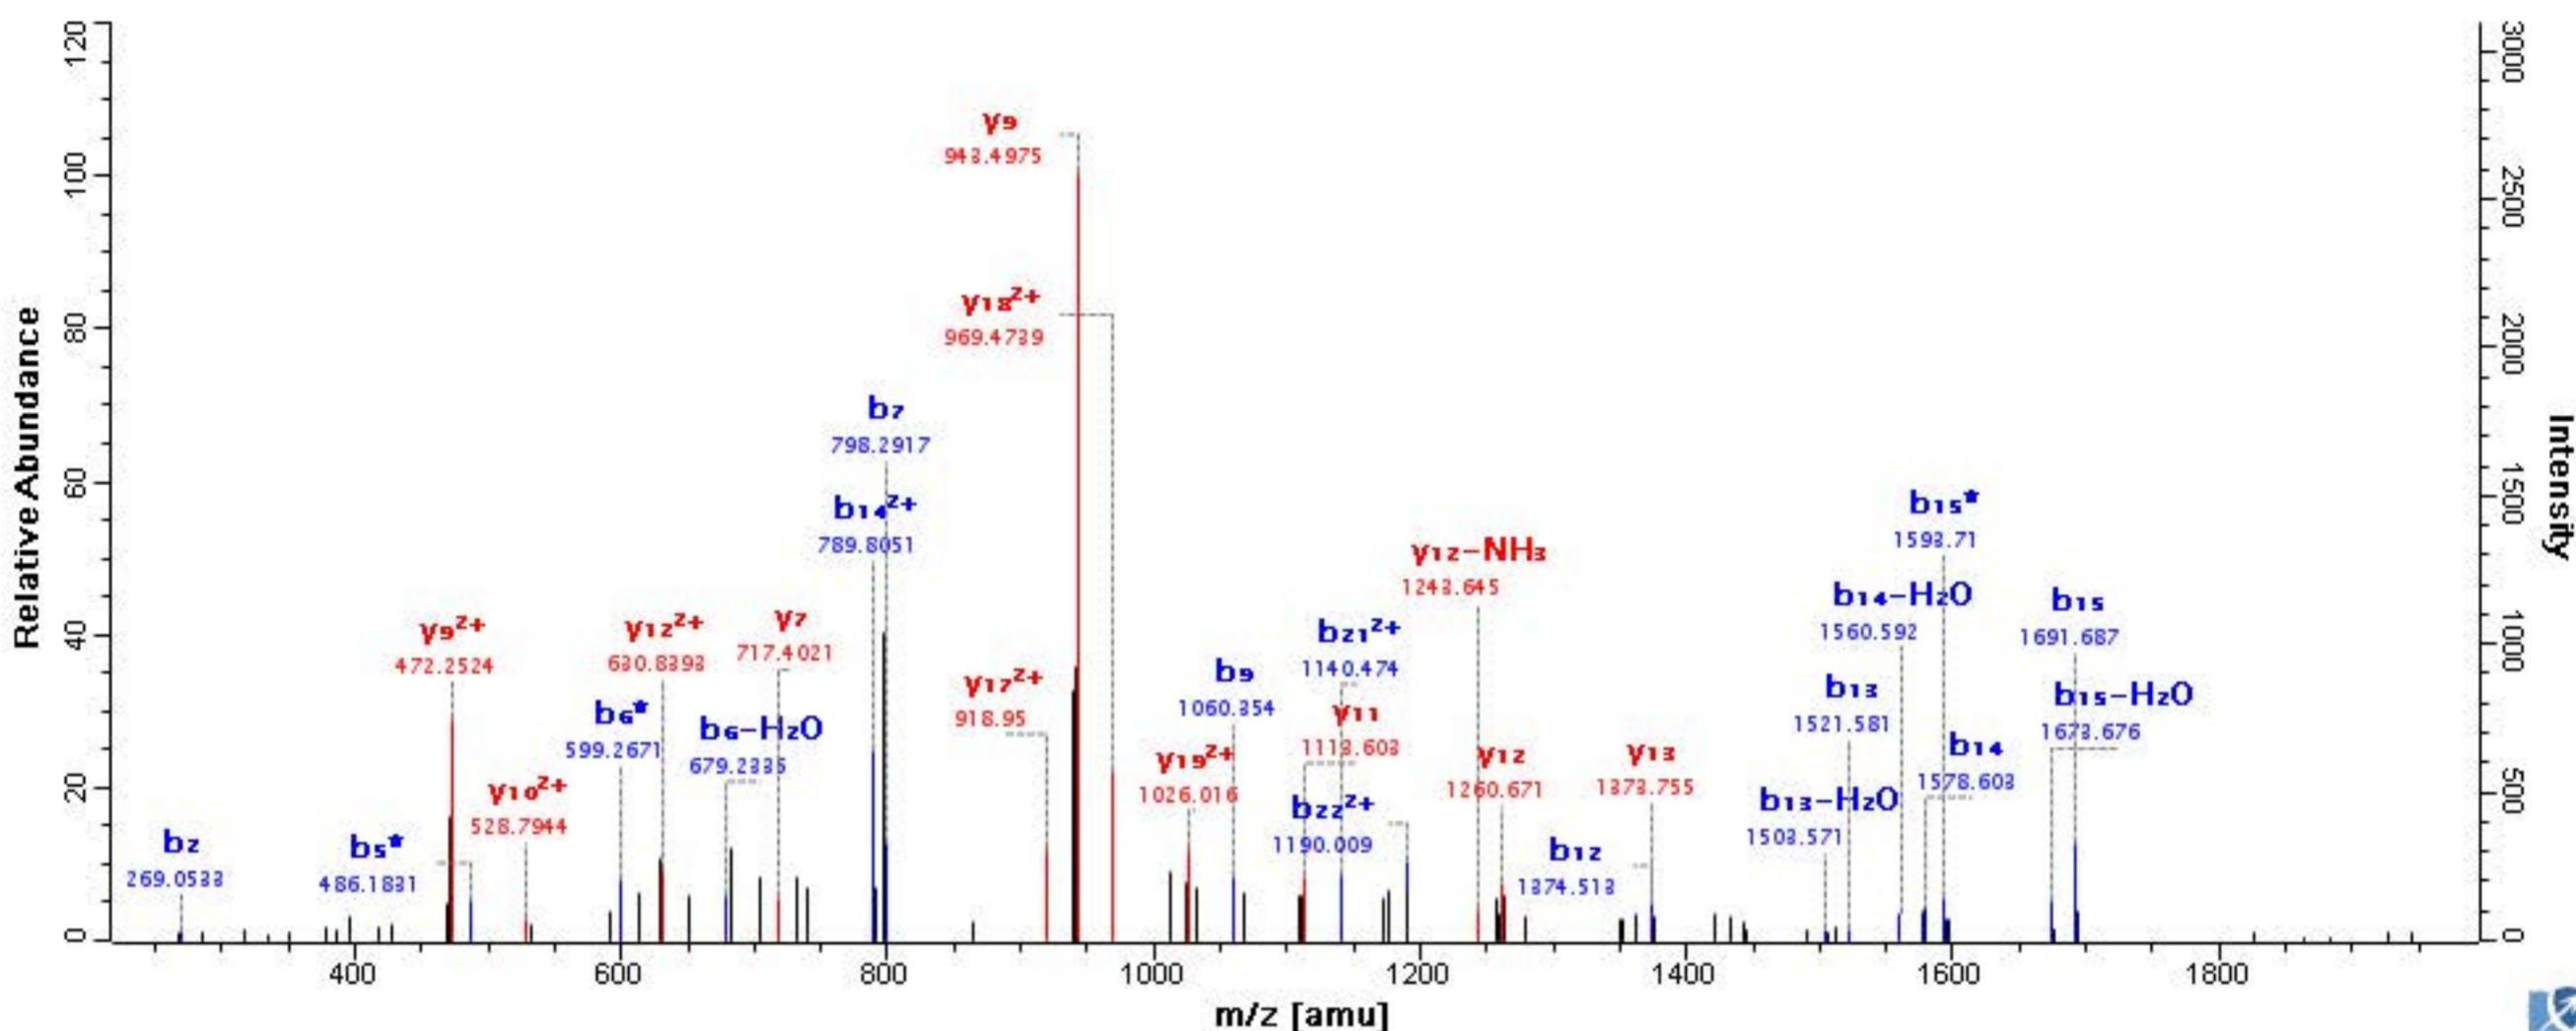

#### precursor information

|                   |                     |
|-------------------|---------------------|
| Mass:             | 2633.16948          |
| m/z:              | System.Collections. |
| Charge:           | System.Collections. |
| Retentiontime:    | System.Collections. |
| Score:            | 108.574             |
| Mass Error [ppm]: | -0.17175            |
| PEP:              | 3.1111E-08          |
| Precursor Type:   | ISO                 |

| b <sup>2+</sup> ion |          | b ion     |          | seq |   |    | y ion    |           | y <sup>2+</sup> ion |           |
|---------------------|----------|-----------|----------|-----|---|----|----------|-----------|---------------------|-----------|
| Δ dalton            | mass     | Δ dalton  | mass     |     |   |    | Δ dalton | mass      | Δ dalton            | mass      |
|                     | 182.0213 |           | 182.0213 | 1   | T | 23 |          |           |                     |           |
|                     | 269.0533 | +0.144593 | 269.0533 | 2   | S | 22 | 2453.163 |           | 2453.163            |           |
|                     | 384.0803 |           | 384.0803 | 3   | D | 21 | 2366.131 |           | 2366.131            |           |
|                     | 455.1174 |           | 455.1174 | 4   | A | 20 | 2251.104 |           | 2251.104            |           |
|                     | 584.16   |           | 584.16   | 5   | E | 19 | 2180.067 |           | 2180.067            |           |
|                     | 697.244  |           | 697.244  | 6   | I | 18 | 2051.025 |           | 1026.016            | +0.311251 |
|                     | 798.2917 | +0.267315 | 798.2917 | 7   | T | 17 | 1937.94  |           | 969.4739            | -0.203358 |
|                     | 945.3271 |           | 945.3271 | 8   | M | 16 | 1836.893 |           | 918.95              | +0.19182  |
|                     | 1060.354 | -0.45146  | 1060.354 | 9   | D | 15 | 1689.857 |           | 1689.857            |           |
|                     | 1174.397 |           | 1174.397 | 10  | N | 14 | 1574.83  |           | 1574.83             |           |
|                     | 1261.429 |           | 1261.429 | 11  | S | 13 | 1460.788 |           | 1460.788            |           |
|                     | 1374.513 | +0.163323 | 1374.513 | 12  | I | 12 | 1373.755 | +0.167252 | 1373.755            |           |
|                     | 1521.581 | +0.331482 | 1521.581 | 13  | F | 11 | 1260.671 | +0.009372 | 630.8393            | +0.02473  |
| +0.043827           | 789.8051 | -0.409831 | 1578.603 | 14  | G | 10 | 1113.603 | +0.03616  | 1113.603            |           |
|                     | 1691.687 | -0.047117 | 1691.687 | 15  | I | 9  | 1056.582 |           | 528.7944            | -0.189487 |
|                     | 1788.74  |           | 1788.74  | 16  | P | 8  | 943.4975 | +0.059657 | 472.2524            | +0.154425 |
|                     | 1917.782 |           | 1917.782 | 17  | E | 7  | 846.4447 |           | 846.4447            |           |
|                     | 1974.804 |           | 1974.804 | 18  | G | 6  | 717.4021 | +0.221664 | 717.4021            |           |
|                     | 2061.836 |           | 2061.836 | 19  | S | 5  | 660.3807 |           | 660.3807            |           |
|                     | 2132.873 |           | 2132.873 | 20  | A | 4  | 573.3486 |           | 573.3486            |           |
| +0.392612           | 1140.474 |           | 2279.941 | 21  | F | 3  | 502.3115 |           | 502.3115            |           |
| -0.106683           | 1190.009 |           | 2379.01  | 22  | V | 2  | 355.2431 |           | 355.2431            |           |
|                     | 2480.057 |           | 2480.057 | 23  | T | 1  | 256.1747 |           | 256.1747            |           |
|                     |          |           |          | 24  | K | 0  | 155.127  |           | 155.127             |           |

#### general information

|                       |             |
|-----------------------|-------------|
| Annotation:           | 15 of 24    |
| AminoAcids Coverage:  | 62 %        |
| Intensity Coverage:   | 45 %        |
| Protein Localisation: | 297 ... 320 |

Source: 201 20602\_VR\_Bsu\_TripleSILAC\_pWTPPrkCPrpC\_F20  
 Scannumber: 13293  
 Protein: BSU33930; pgk  
 Peptide Score: 111.66  
 Method: ITMS; CID; 3

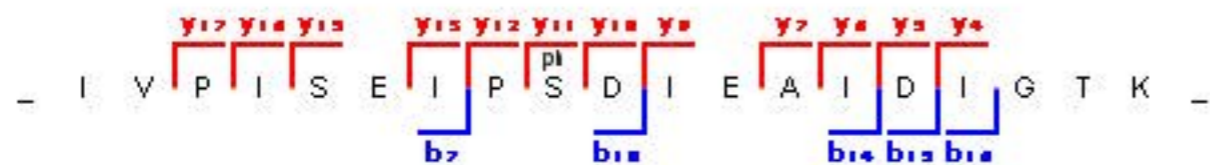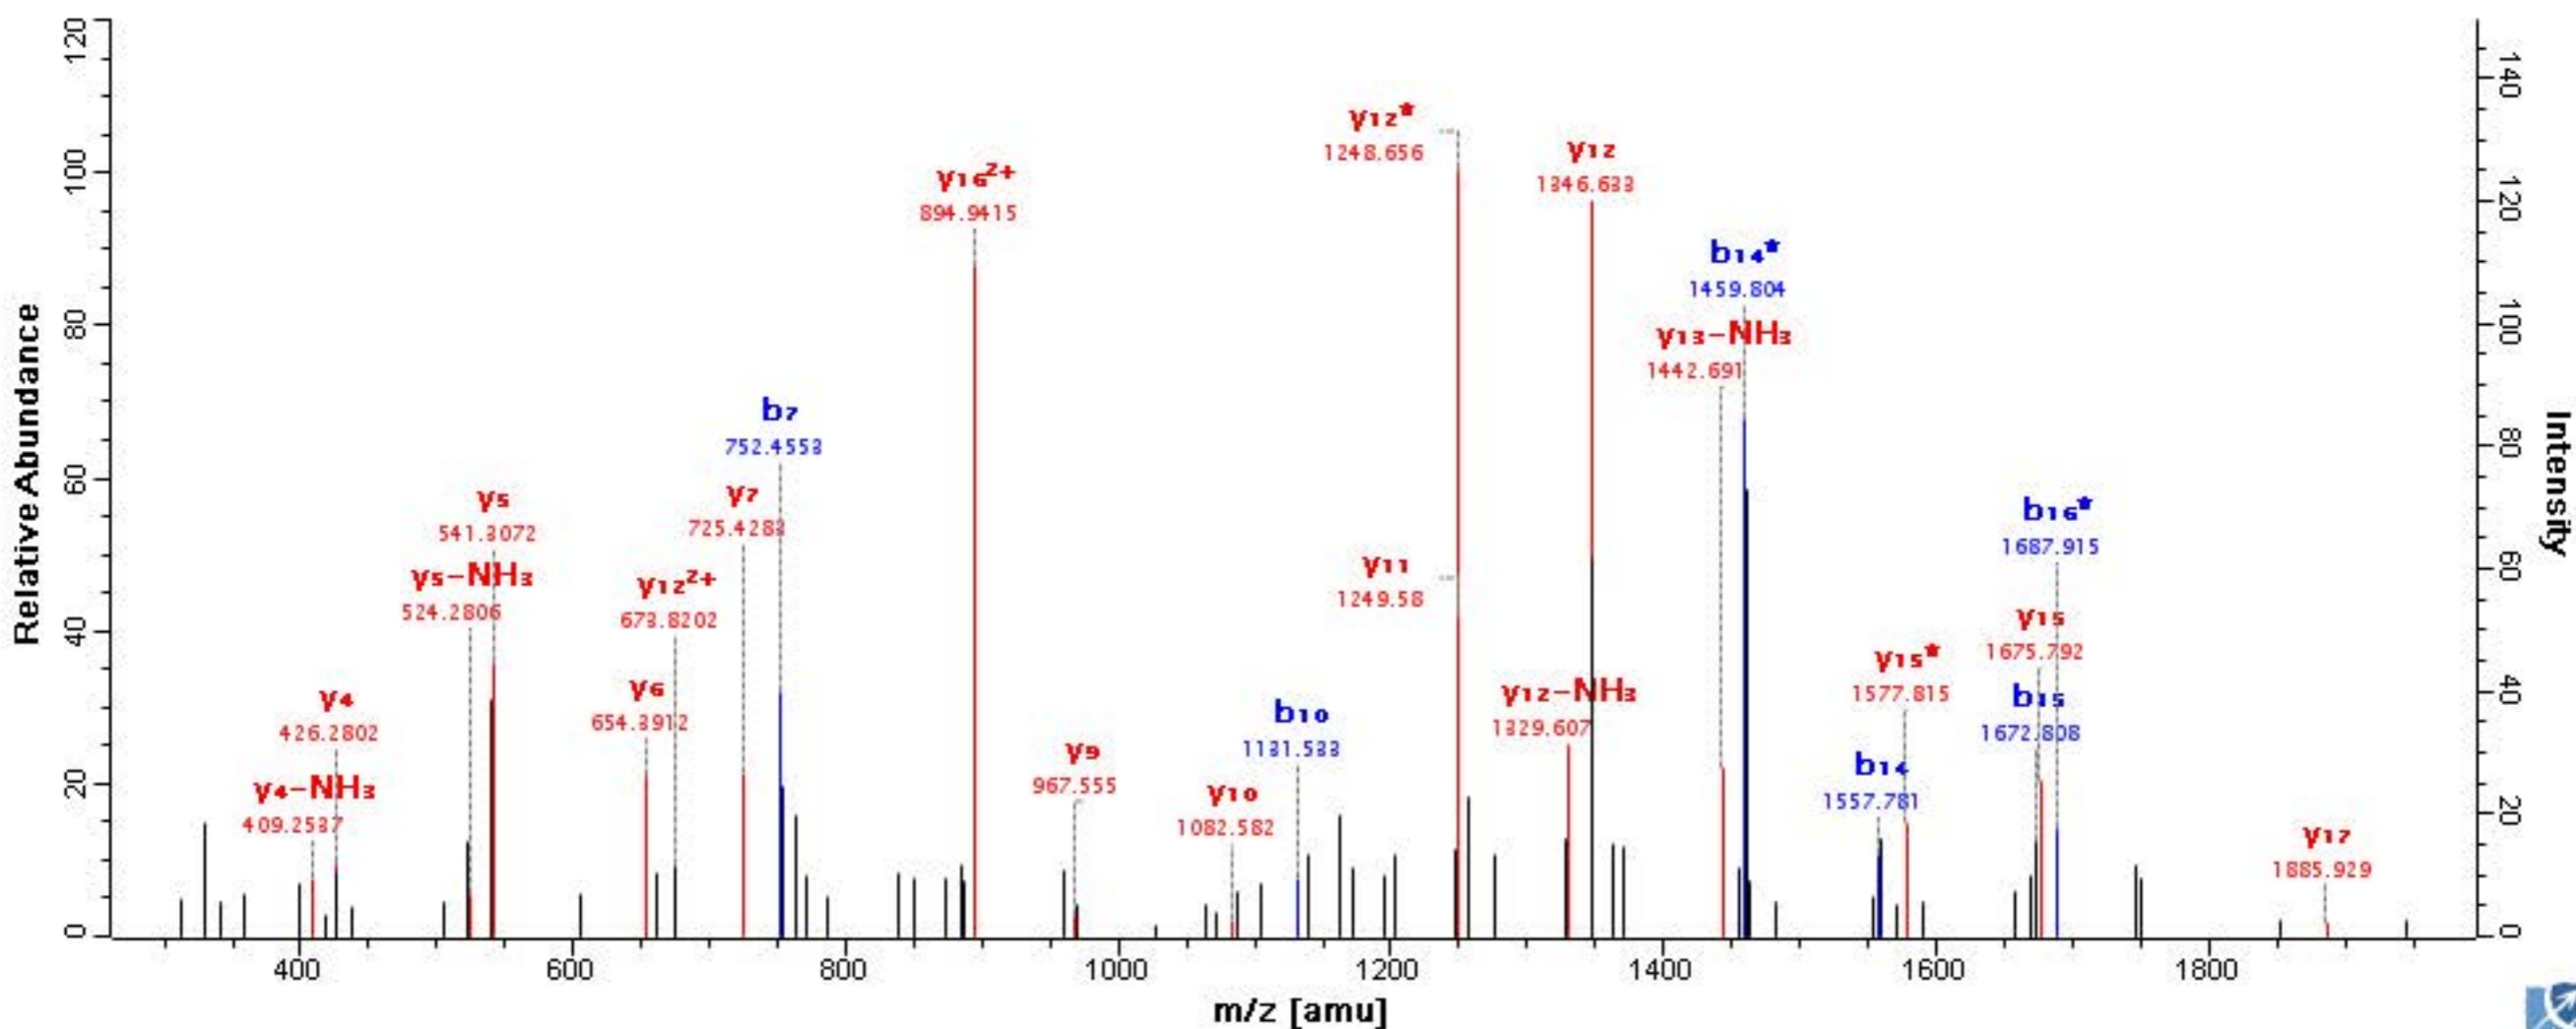

#### precursor information

|                   |                     |
|-------------------|---------------------|
| Mass:             | 2089.05984          |
| m/z:              | System.Collections. |
| Charge:           | System.Collections. |
| Retentiontime:    | System.Collections. |
| Score:            | 111.6588            |
| Mass Error [ppm]: | 0.13155             |
| PEP:              | 2.4638E-12          |
| Precursor Type:   | MULTI               |

| b ion      |              |    |     |    | y ion        |            | y <sup>2+</sup> ion |            |
|------------|--------------|----|-----|----|--------------|------------|---------------------|------------|
| Δ dalton   | mass         |    | seq |    | Δ dalton     | mass       | Δ dalton            | mass       |
|            | 114.09134045 | 1  | I   | 18 |              |            |                     |            |
|            | 213.15975436 | 2  | V   | 17 | 1984.99698   |            | 1984.99698          |            |
|            | 310.21251822 | 3  | P   | 16 | 1885.9285661 | +0.4035873 | 1885.9285661        |            |
|            | 423.2965822  | 4  | I   | 15 | 1788.8758022 |            | 894.94153934        | -0.3513294 |
|            | 510.32861061 | 5  | S   | 14 | 1675.7917382 | +0.3956397 | 1675.7917382        |            |
|            | 639.3712037  | 6  | E   | 13 | 1588.7597098 |            | 1588.7597098        |            |
| -0.0678165 | 752.45526768 | 7  | I   | 12 | 1459.7171167 |            | 1459.7171167        |            |
|            | 849.50803153 | 8  | P   | 11 | 1346.6330527 | +0.0020791 | 673.8201646         | +0.2430678 |
|            | 1016.5063904 | 9  | S   | 10 | 1249.5802889 | +0.2951994 | 1249.5802889        |            |
| +0.0152506 | 1131.5333334 | 10 | D   | 9  | 1082.5819301 | +0.4476109 | 1082.5819301        |            |
|            | 1244.6173974 | 11 | I   | 8  | 967.55498704 | -0.3748113 | 967.55498704        |            |
|            | 1373.6599905 | 12 | E   | 7  | 854.47092306 |            | 854.47092306        |            |
|            | 1444.6971042 | 13 | A   | 6  | 725.42832996 | +0.1164698 | 725.42832996        |            |
| -0.0235999 | 1557.7811682 | 14 | I   | 5  | 654.39121617 | -0.1133841 | 654.39121617        |            |
| +0.0593204 | 1672.8081113 | 15 | D   | 4  | 541.30715219 | +0.1886974 | 541.30715219        |            |
|            | 1785.8921752 | 16 | I   | 3  | 426.28020916 | -0.0387541 | 426.28020916        |            |
|            | 1842.913639  | 17 | G   | 2  | 313.19614518 |            | 313.19614518        |            |
|            | 1943.9613174 | 18 | T   | 1  | 256.17468146 |            | 256.17468146        |            |
|            |              | 19 | K   | 0  | 155.12700298 |            | 155.12700298        |            |

#### general information

|                       |             |
|-----------------------|-------------|
| Annotation:           | 12 of 19    |
| AminoAcids Coverag    | 63 %        |
| Intensity Coverage:   | 53 %        |
| Protein Localisation: | 280 ... 298 |

Source: 201 20602\_VR\_Bsu\_TripleSILAC\_pWTPPrkCPrpC\_F20  
 Scannumber: 13626  
 Protein: BSU04680; rsbS; ycx5  
 Peptide Score: 100.59  
 Method: ITMS; CID; 3

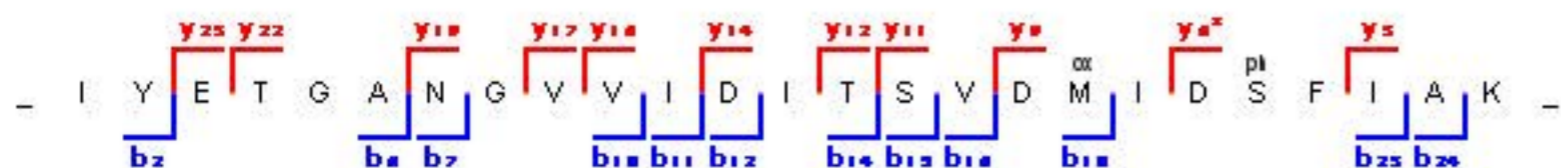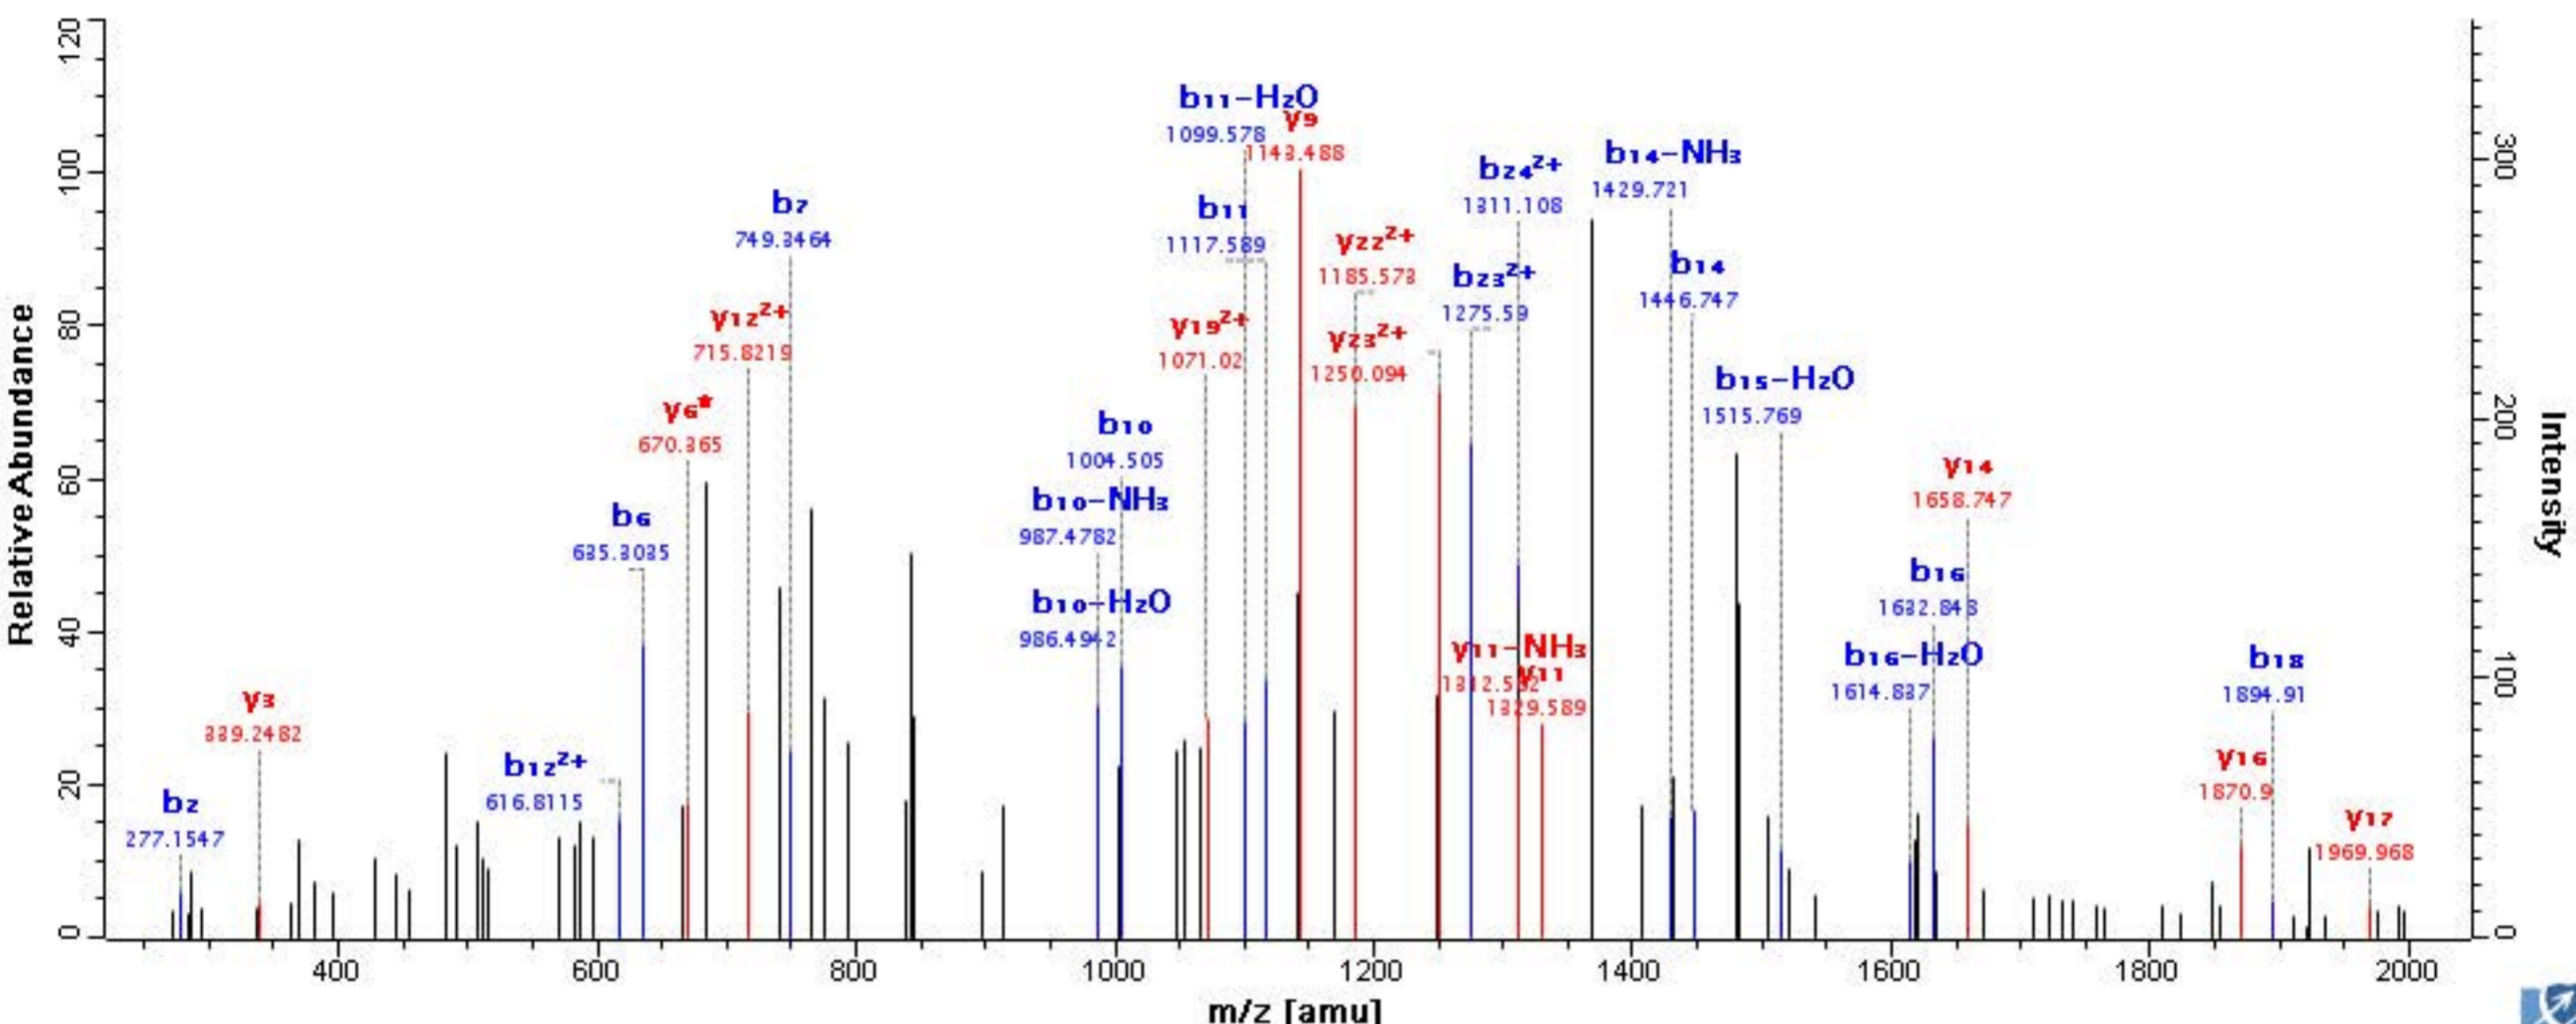

precursor information

|                   |                     |
|-------------------|---------------------|
| Mass:             | 2766.30692          |
| m/z:              | System.Collections. |
| Charge:           | System.Collections. |
| Retentiontime:    | System.Collections. |
| Score:            | 100.5884            |
| Mass Error [ppm]: | -0.20215            |
| PEP:              | 3.0419E-12          |
| Precursor Type:   | MULTI               |

| b <sup>2+</sup> ion |          | b ion     |          |     | y ion |          | y <sup>2+</sup> ion |           |                    |
|---------------------|----------|-----------|----------|-----|-------|----------|---------------------|-----------|--------------------|
| Δ dalton            | mass     | Δ dalton  | mass     | seq |       | Δ dalton | mass                | Δ dalton  | mass               |
|                     | 114.0913 |           | 114.0913 | 1   | I     | 24       |                     |           |                    |
|                     | 277.1547 | -0.03742  | 277.1547 | 2   | Y     | 23       | 2662.245            |           | 2662.245           |
|                     | 406.1973 |           | 406.1973 | 3   | E     | 22       | 2499.182            |           | 1250.094 +0.137148 |
|                     | 507.2449 |           | 507.2449 | 4   | T     | 21       | 2370.139            |           | 1185.573 +0.268064 |
|                     | 564.2664 |           | 564.2664 | 5   | G     | 20       | 2269.091            |           | 2269.091           |
|                     | 635.3035 | -0.140981 | 635.3035 | 6   | A     | 19       | 2212.07             |           | 2212.07            |
|                     | 749.3464 | -0.104685 | 749.3464 | 7   | N     | 18       | 2141.033            |           | 1071.02 +0.078882  |
|                     | 806.3679 |           | 806.3679 | 8   | G     | 17       | 2026.99             |           | 2026.99            |
|                     | 905.4363 |           | 905.4363 | 9   | V     | 16       | 1969.968            | +0.094056 | 1969.968           |
|                     | 1004.505 | +0.172997 | 1004.505 | 10  | V     | 15       | 1870.9              | +0.186761 | 1870.9             |
|                     | 1117.589 | +0.082097 | 1117.589 | 11  | I     | 14       | 1771.831            |           | 1771.831           |
| +0.190748           | 616.8115 |           | 1232.616 | 12  | D     | 13       | 1658.747            | +0.100104 | 1658.747           |
|                     | 1345.7   |           | 1345.7   | 13  | I     | 12       | 1543.72             |           | 1543.72            |
|                     | 1446.747 | +0.132518 | 1446.747 | 14  | T     | 11       | 1430.636            |           | 715.8219 +0.001575 |
|                     | 1533.78  |           | 1533.78  | 15  | S     | 10       | 1329.589            | +0.256836 | 1329.589           |
|                     | 1632.848 | +0.15317  | 1632.848 | 16  | V     | 9        | 1242.557            |           | 1242.557           |
|                     | 1747.875 |           | 1747.875 | 17  | D     | 8        | 1143.488            | +0.171487 | 1143.488           |
|                     | 1894.91  | +0.094368 | 1894.91  | 18  | M     | 7        | 1028.461            |           | 1028.461           |
|                     | 2007.994 |           | 2007.994 | 19  | I     | 6        | 881.426             |           | 881.426            |
|                     | 2123.021 |           | 2123.021 | 20  | D     | 5        | 768.3419            |           | 768.3419           |
|                     | 2290.02  |           | 2290.02  | 21  | S     | 4        | 653.315             |           | 653.315            |
|                     | 2437.088 |           | 2437.088 | 22  | F     | 3        | 486.3166            |           | 486.3166           |
| +0.373073           | 1275.59  |           | 2550.172 | 23  | I     | 2        | 339.2482            | +0.171314 | 339.2482           |
| +0.031274           | 1311.108 |           | 2621.209 | 24  | A     | 1        | 226.1641            |           | 226.1641           |
|                     |          |           |          | 25  | K     | 0        | 155.127             |           | 155.127            |

general information

|                       |           |
|-----------------------|-----------|
| Annotation:           | 18 of 25  |
| AminoAcids Coverage:  | 72 %      |
| Intensity Coverage:   | 39 %      |
| Protein Localisation: | 39 ... 63 |

Source: 201 20602\_VR\_Bsu\_TripleSILAC\_pWTPPrkCPrpC\_F20  
 Scannumber: 13692  
 Protein: BSU27660; yrzD  
 Peptide Score: 90.72  
 Method: ITMS; CID; 3

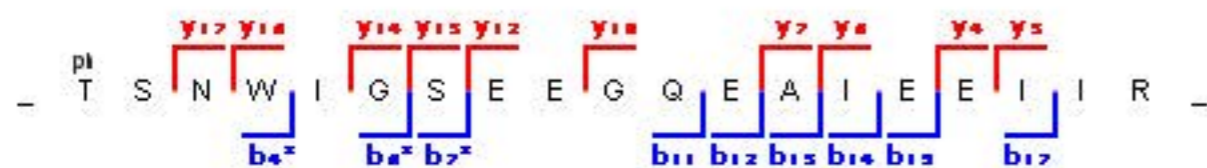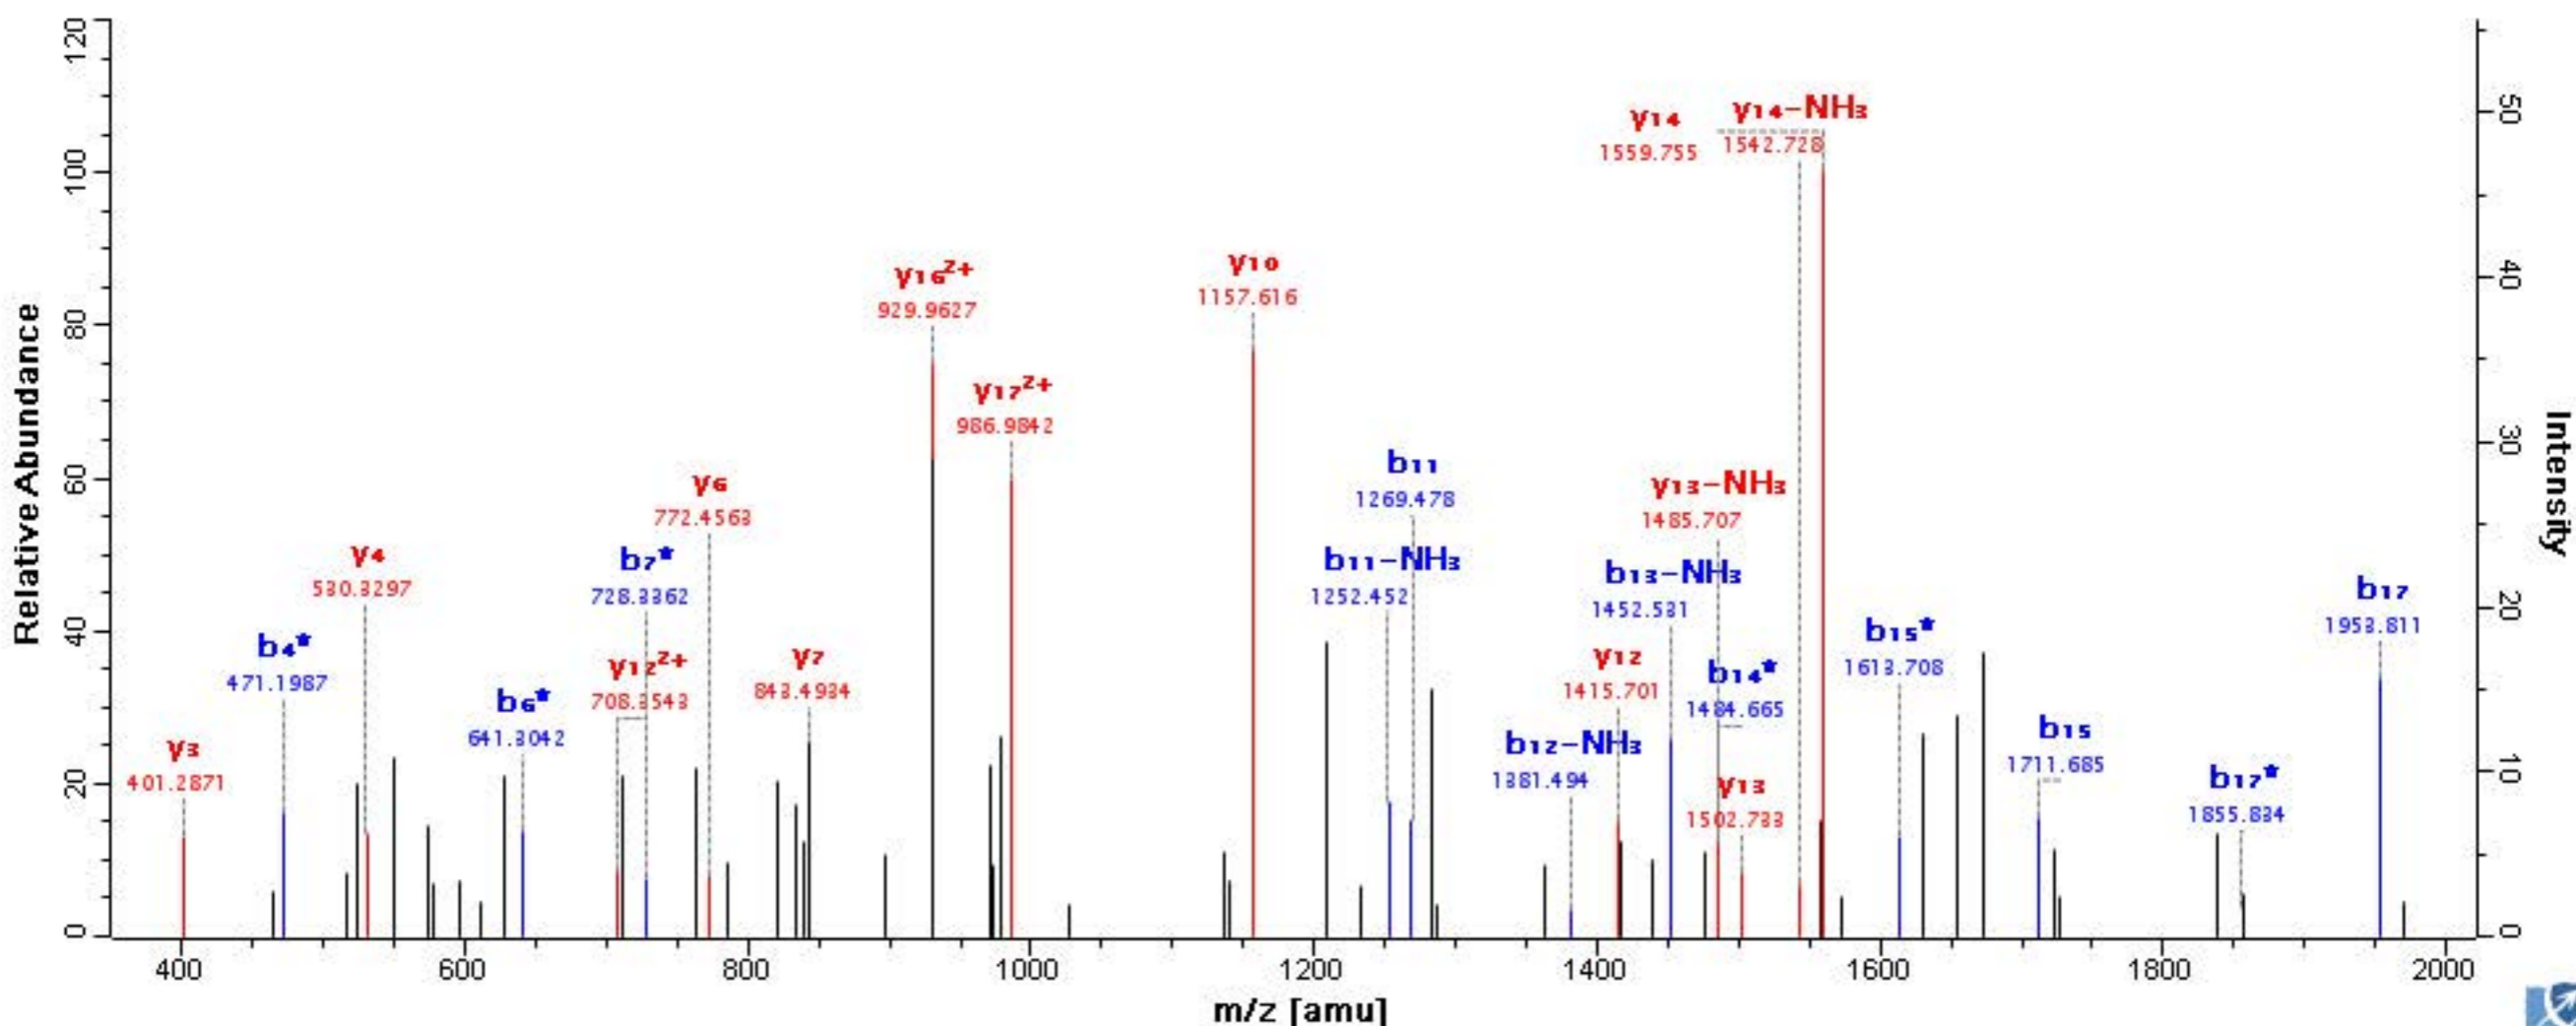

#### precursor information

|                   |                     |
|-------------------|---------------------|
| Mass:             | 2240.00042          |
| m/z:              | System.Collections. |
| Charge:           | System.Collections. |
| Retentiontime:    | System.Collections. |
| Score:            | 90.7179             |
| Mass Error [ppm]: | 0.26549             |
| PEP:              | 0.022506            |
| Precursor Type:   | ISO                 |

#### general information

|                       |           |
|-----------------------|-----------|
| Annotation:           | 14 of 19  |
| AminoAcids Coverag    | 74%       |
| Intensity Coverage:   | 46%       |
| Protein Localisation: | 80 ... 98 |

| b ion      |              |    |     |    | γ ion        |            | γ <sup>2+</sup> ion |            |
|------------|--------------|----|-----|----|--------------|------------|---------------------|------------|
| Δ dalton   | mass         |    | seq |    | Δ dalton     | mass       | Δ dalton            | mass       |
|            | 182.02128535 | 1  | T   | 18 |              |            |                     |            |
|            | 269.05331376 | 2  | S   | 17 | 2059.9930896 |            | 2059.9930896        |            |
|            | 383.09624121 | 3  | N   | 16 | 1972.9610611 |            | 986.9841688         | -0.1335829 |
|            | 569.17555416 | 4  | W   | 15 | 1858.9181337 |            | 929.96270508        | -0.0081152 |
|            | 682.25961814 | 5  | I   | 14 | 1672.8388207 |            | 1672.8388207        |            |
|            | 739.28108186 | 6  | G   | 13 | 1559.7547568 | +0.222294  | 1559.7547568        |            |
|            | 826.31311027 | 7  | S   | 12 | 1502.733293  | +0.0961747 | 1502.733293         |            |
|            | 955.35570337 | 8  | E   | 11 | 1415.7012646 | -0.0461133 | 708.35427055        | -0.4182354 |
|            | 1084.3982965 | 9  | E   | 10 | 1286.6586715 |            | 1286.6586715        |            |
|            | 1141.4197602 | 10 | G   | 9  | 1157.6160784 | +0.0454206 | 1157.6160784        |            |
| -0.3178152 | 1269.4783377 | 11 | Q   | 8  | 1100.5946147 |            | 1100.5946147        |            |
|            | 1398.5209308 | 12 | E   | 7  | 972.5360372  |            | 972.5360372         |            |
|            | 1469.5580446 | 13 | A   | 6  | 843.4934441  | -0.3253533 | 843.4934441         |            |
|            | 1582.6421086 | 14 | I   | 5  | 772.45633031 | -0.2458811 | 772.45633031        |            |
| +0.3349517 | 1711.6847017 | 15 | E   | 4  | 659.37226633 |            | 659.37226633        |            |
|            | 1840.7272948 | 16 | E   | 3  | 530.32967324 | +0.2582174 | 530.32967324        |            |
| +0.1514098 | 1953.8113587 | 17 | I   | 2  | 401.28708014 | +0.037871  | 401.28708014        |            |
|            | 2066.8954227 | 18 | I   | 1  | 288.20301616 |            | 288.20301616        |            |
|            |              | 19 | R   | 0  | 175.11895218 |            | 175.11895218        |            |

Source: 20120602\_VR\_Bsu\_TripleSILAC\_pWTPPrkCPrpC\_F20  
 Scannumber: 6072  
 Protein: BSU13960; ykwC  
 Peptide Score: 139.49  
 Method: ITMS; CID; 3

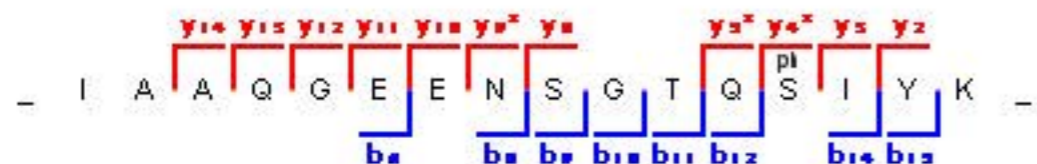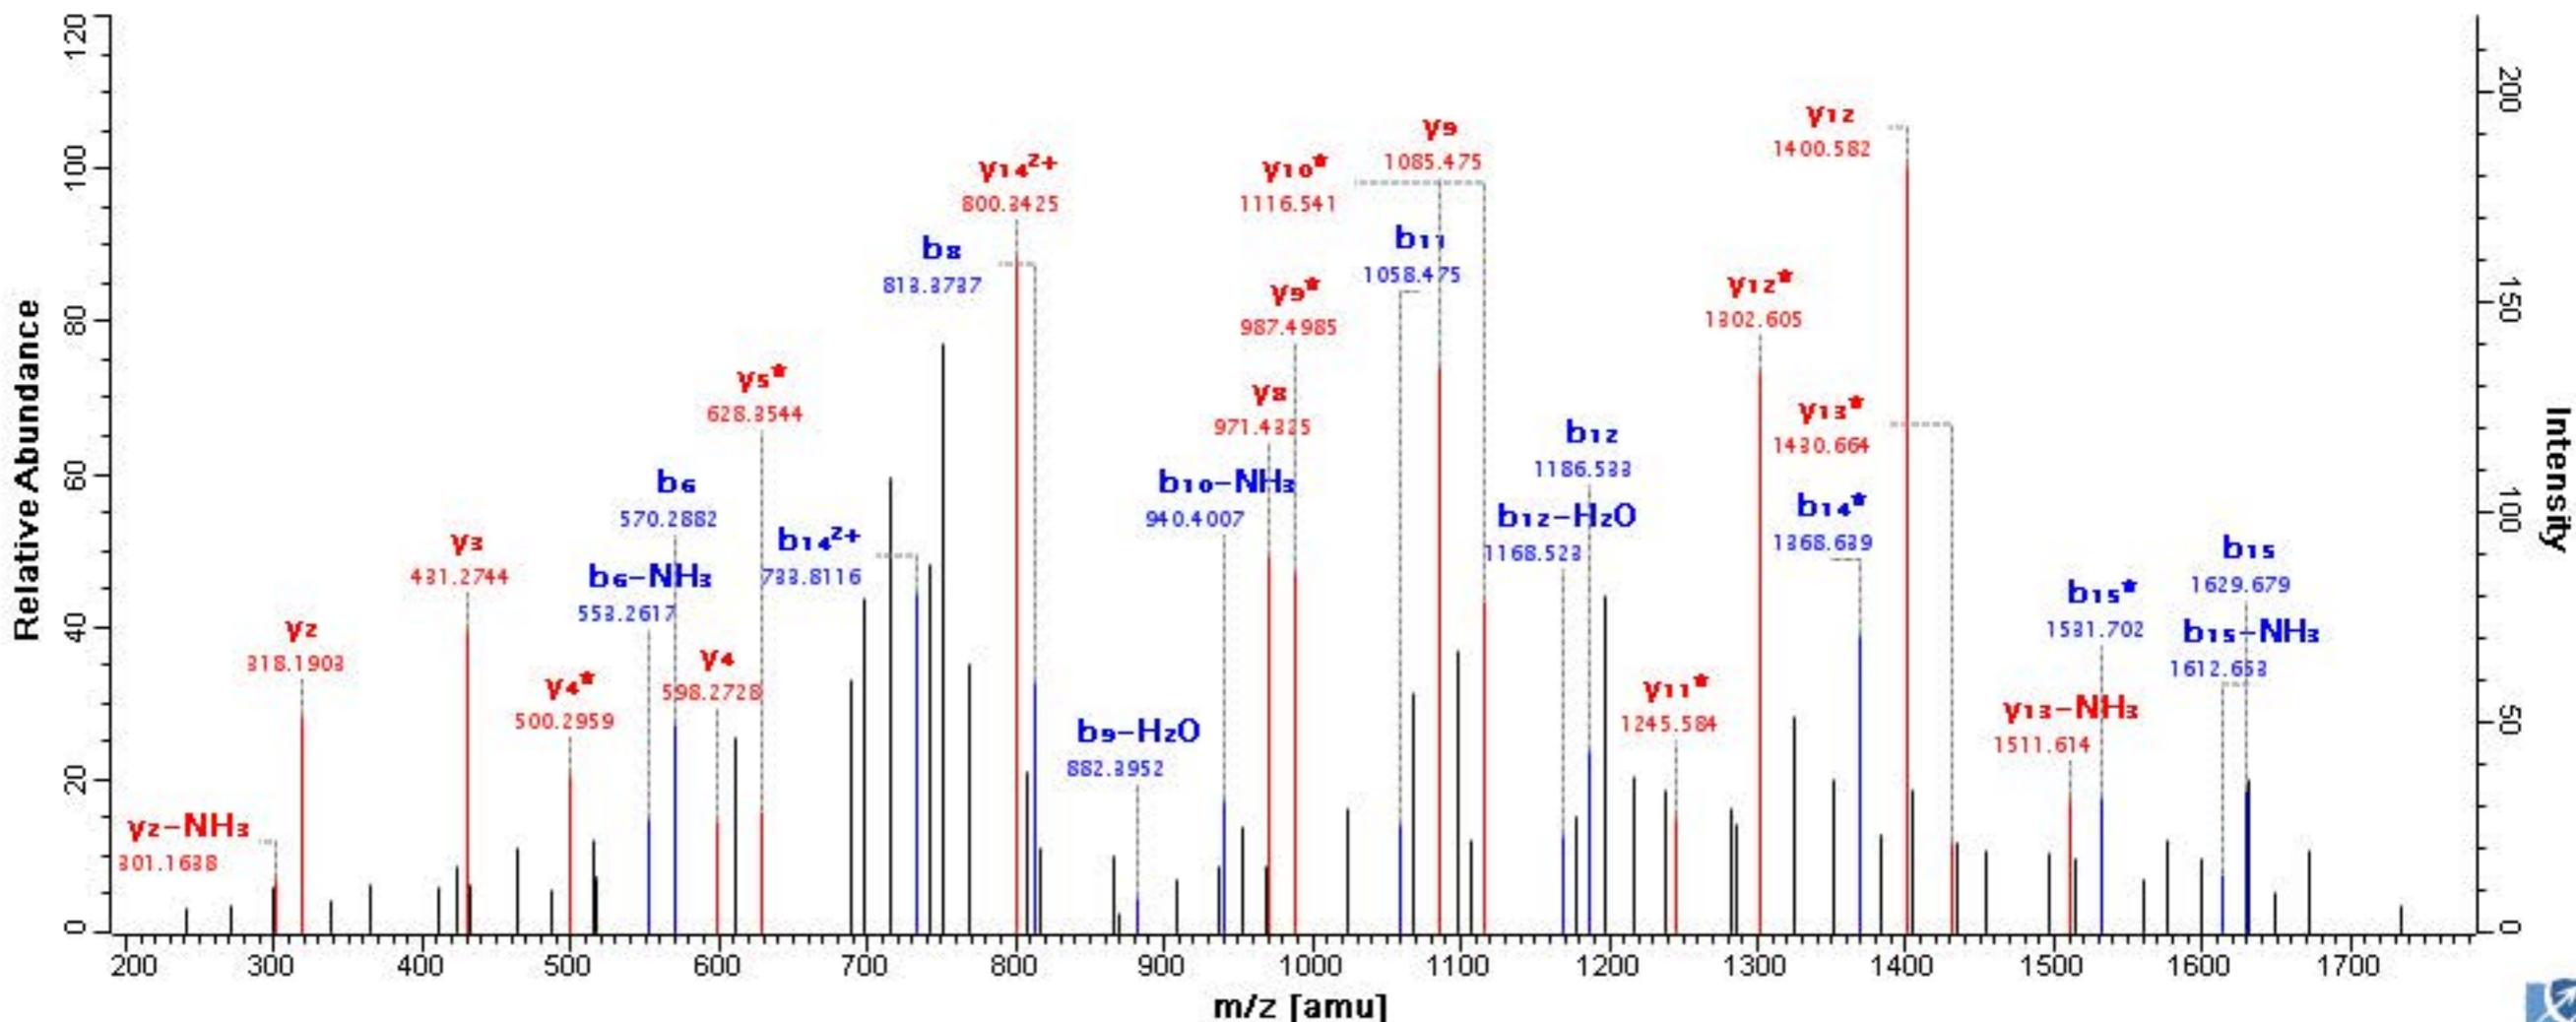

**precursor information**

|                   |                     |
|-------------------|---------------------|
| Mass:             | 1782.79117          |
| m/z:              | System.Collections. |
| Charge:           | System.Collections. |
| Retentiontime:    | System.Collections. |
| Score:            | 139.4914            |
| Mass Error [ppm]: | -0.28247            |
| PEP:              | 7.6866E-23          |
| Precursor Type:   | ISO                 |

| b <sup>2+</sup> ion |          | b ion     |          |     | γ ion |          | γ <sup>2+</sup> ion |          |                    |
|---------------------|----------|-----------|----------|-----|-------|----------|---------------------|----------|--------------------|
| Δ dalton            | mass     | Δ dalton  | mass     | seq |       | Δ dalton | mass                | Δ dalton | mass               |
|                     | 114.0913 |           | 114.0913 | 1   | I     | 15       |                     |          |                    |
|                     | 185.1285 |           | 185.1285 | 2   | A     | 14       | 1670.715            |          | 1670.715           |
|                     | 256.1656 |           | 256.1656 | 3   | A     | 13       | 1599.678            |          | 800.3425 +0.104681 |
|                     | 384.2241 |           | 384.2241 | 4   | Q     | 12       | 1528.641            |          | 1528.641           |
|                     | 441.2456 |           | 441.2456 | 5   | G     | 11       | 1400.582 +0.196607  |          | 1400.582           |
|                     | 570.2882 | +0.045599 | 570.2882 | 6   | E     | 10       | 1343.561            |          | 1343.561           |
|                     | 699.3308 |           | 699.3308 | 7   | E     | 9        | 1214.518            |          | 1214.518           |
|                     | 813.3737 | +0.172237 | 813.3737 | 8   | N     | 8        | 1085.475 +0.065464  |          | 1085.475           |
|                     | 900.4058 |           | 900.4058 | 9   | S     | 7        | 971.4325 +0.056023  |          | 971.4325           |
|                     | 957.4272 |           | 957.4272 | 10  | G     | 6        | 884.4005            |          | 884.4005           |
|                     | 1058.475 | +0.053915 | 1058.475 | 11  | T     | 5        | 827.379             |          | 827.379            |
|                     | 1186.533 | -0.081323 | 1186.533 | 12  | Q     | 4        | 726.3313            |          | 726.3313           |
|                     | 1353.532 |           | 1353.532 | 13  | S     | 3        | 598.2728 +0.12196   |          | 598.2728           |
| -0.106873           | 733.8116 |           | 1466.616 | 14  | I     | 2        | 431.2744 +0.012897  |          | 431.2744           |
|                     | 1629.679 | -0.070091 | 1629.679 | 15  | Y     | 1        | 318.1903 +0.100806  |          | 318.1903           |
|                     |          |           |          | 16  | K     | 0        | 155.127             |          | 155.127            |

**general information**

|                       |             |
|-----------------------|-------------|
| Annotation:           | 13 of 16    |
| AminoAcids Coverag    | 81 %        |
| Intensity Coverage:   | 49 %        |
| Protein Localisation: | 269 ... 284 |

Source: 201 20602\_VR\_Bsu\_TripleSILAC\_pWTPPrkCPrpC\_F20  
 Scannumber: 7500  
 Protein: BSU13620; mtnD; ykrZ  
 Peptide Score: 102.5  
 Method: ITMS; CID; 3

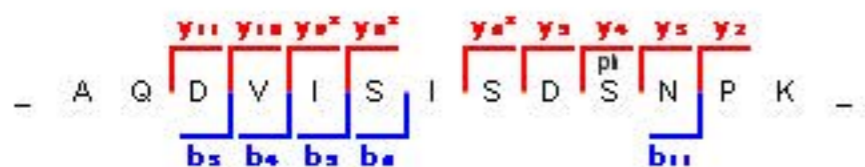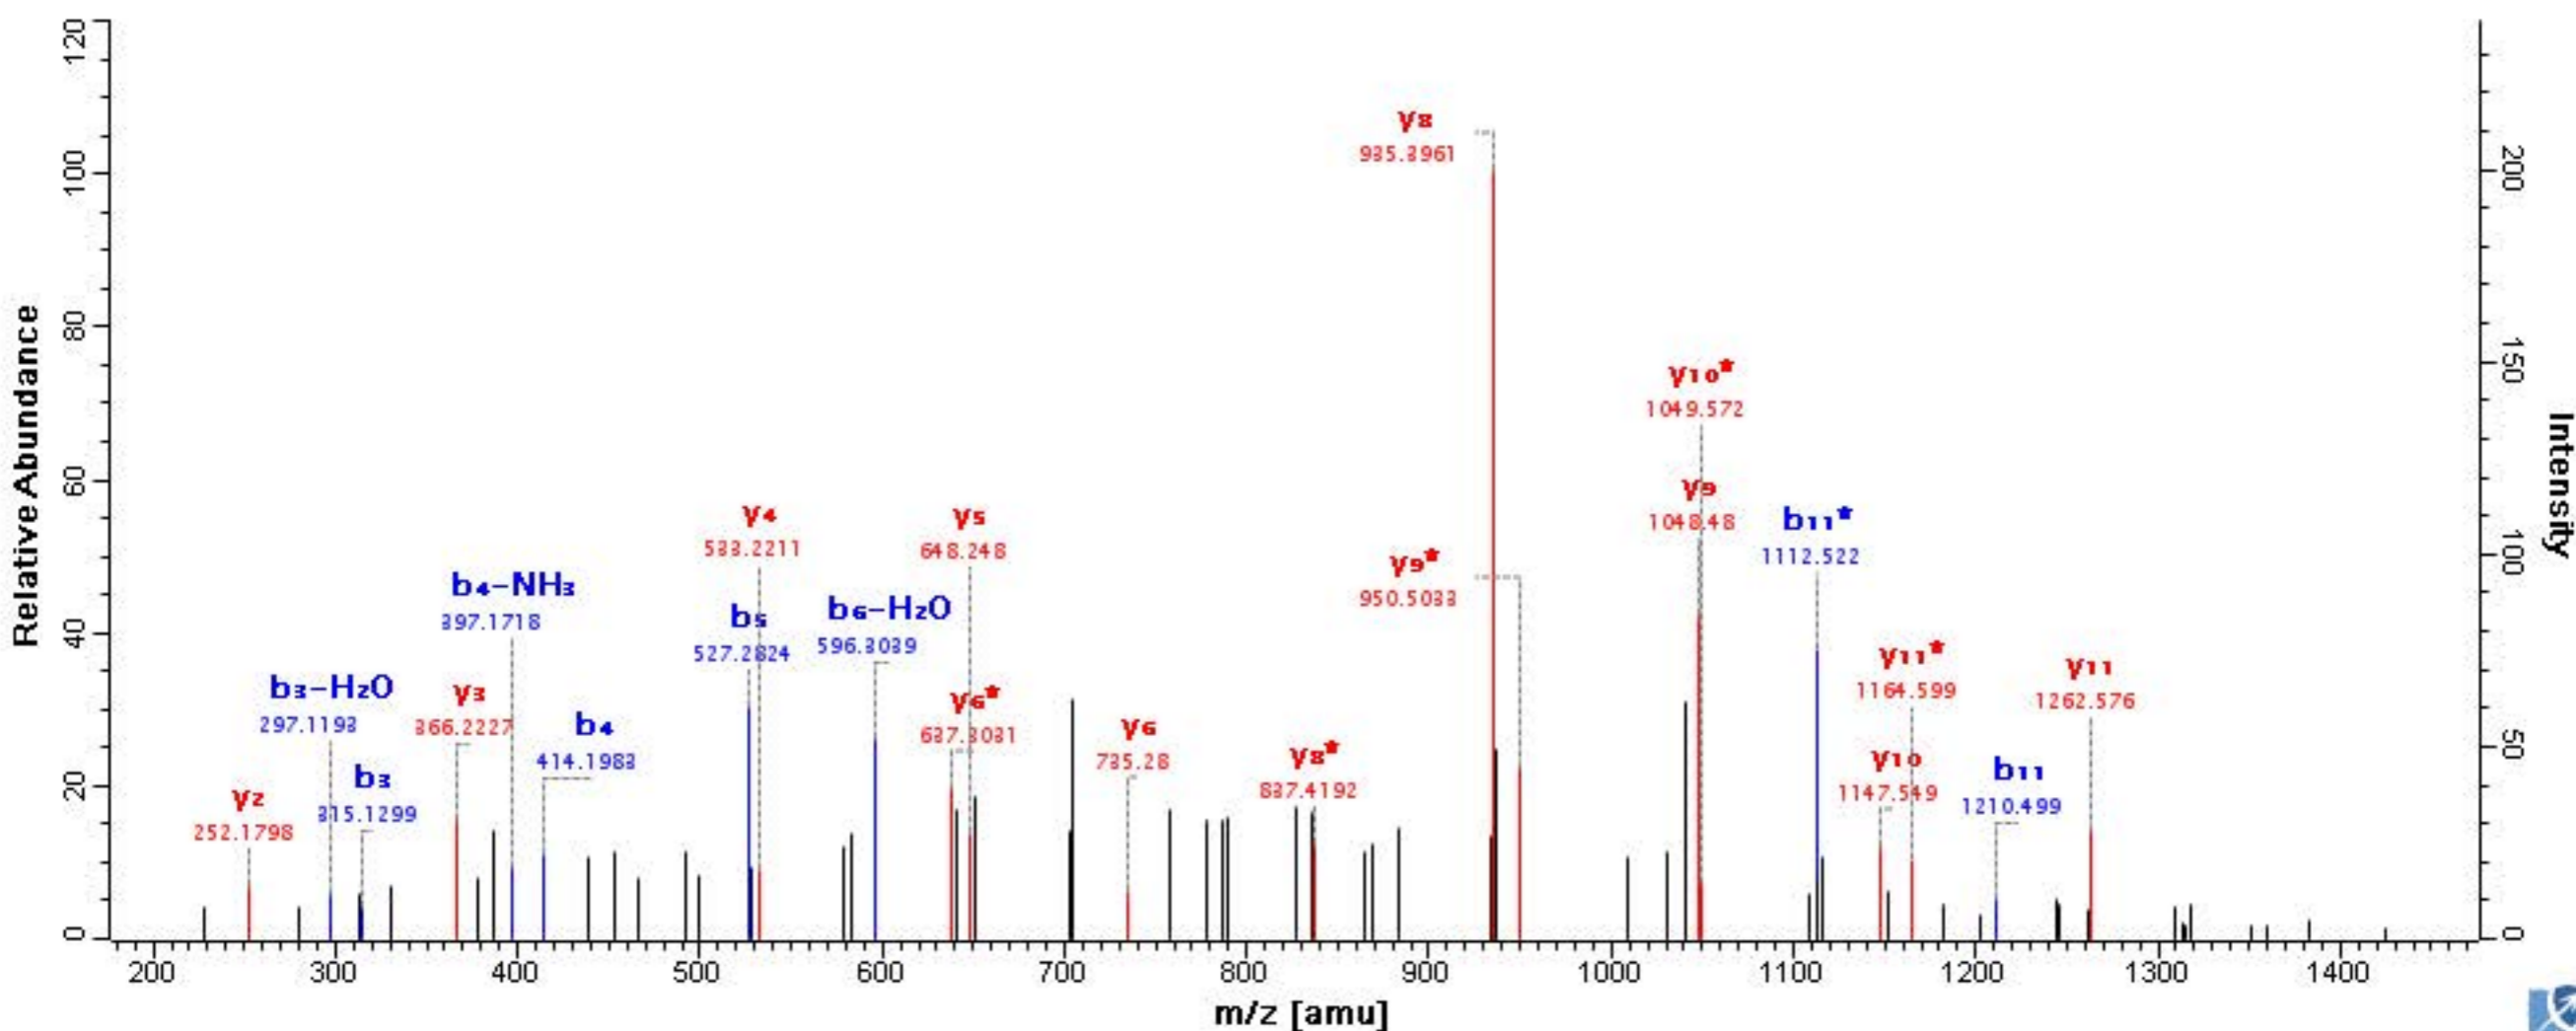

#### precursor information

|                   |                     |
|-------------------|---------------------|
| Mass:             | 1452.6498           |
| m/z:              | System.Collections. |
| Charge:           | System.Collections. |
| Retentiontime:    | System.Collections. |
| Score:            | 102.505             |
| Mass Error [ppm]: | 0.029874            |
| PEP:              | 5.2887E-06          |
| Precursor Type:   | MULTI               |

#### general information

|                       |           |
|-----------------------|-----------|
| Annotation:           | 9 of 13   |
| AminoAcids Coverage:  | 69 %      |
| Intensity Coverage:   | 44 %      |
| Protein Localisation: | 76 ... 88 |

| b ion      |                | γ ion |     |    |                |            |
|------------|----------------|-------|-----|----|----------------|------------|
| Δ dalton   | mass           |       | seq |    | Δ dalton       | mass       |
|            | 72.044390254   | 1     | A   | 12 |                |            |
|            | 200.102967766  | 2     | Q   | 11 | 1390.634115374 |            |
| +0.0538661 | 315.129910798  | 3     | D   | 10 | 1262.575537862 | +0.1875237 |
| -0.0822969 | 414.198324714  | 4     | V   | 9  | 1147.54859483  | +0.2292372 |
| +0.151022  | 527.282388694  | 5     | I   | 8  | 1048.480180914 | +0.0662058 |
|            | 614.314417104  | 6     | S   | 7  | 935.396116933  | +0.1979382 |
|            | 727.398481085  | 7     | I   | 6  | 848.364088524  |            |
|            | 814.430509495  | 8     | S   | 5  | 735.280024543  | +0.085576  |
|            | 929.457452527  | 9     | D   | 4  | 648.247996133  | +0.1436665 |
|            | 1096.455811345 | 10    | S   | 3  | 533.221053101  | +0.0704508 |
| +0.3877358 | 1210.498738792 | 11    | N   | 2  | 366.222694283  | +0.1091539 |
|            | 1307.551502644 | 12    | P   | 1  | 252.179766836  | -0.048999  |
|            |                | 13    | K   | 0  | 155.127002984  |            |

Source: 20120602\_VR\_Bsu\_TripleSILAC\_pWTPPrkCPrpC\_F20  
 Scannumber: 8105  
 Protein: BSU25020; sodA; yggD  
 Peptide Score: 202.34  
 Method: ITMS; CID; 3

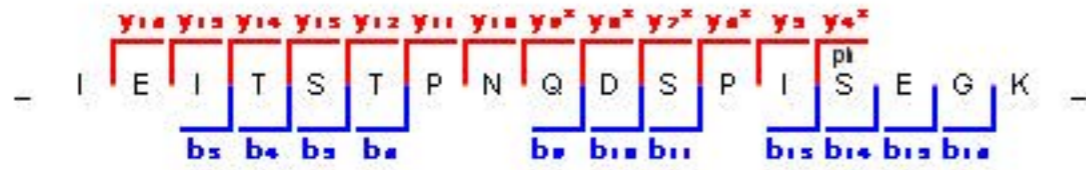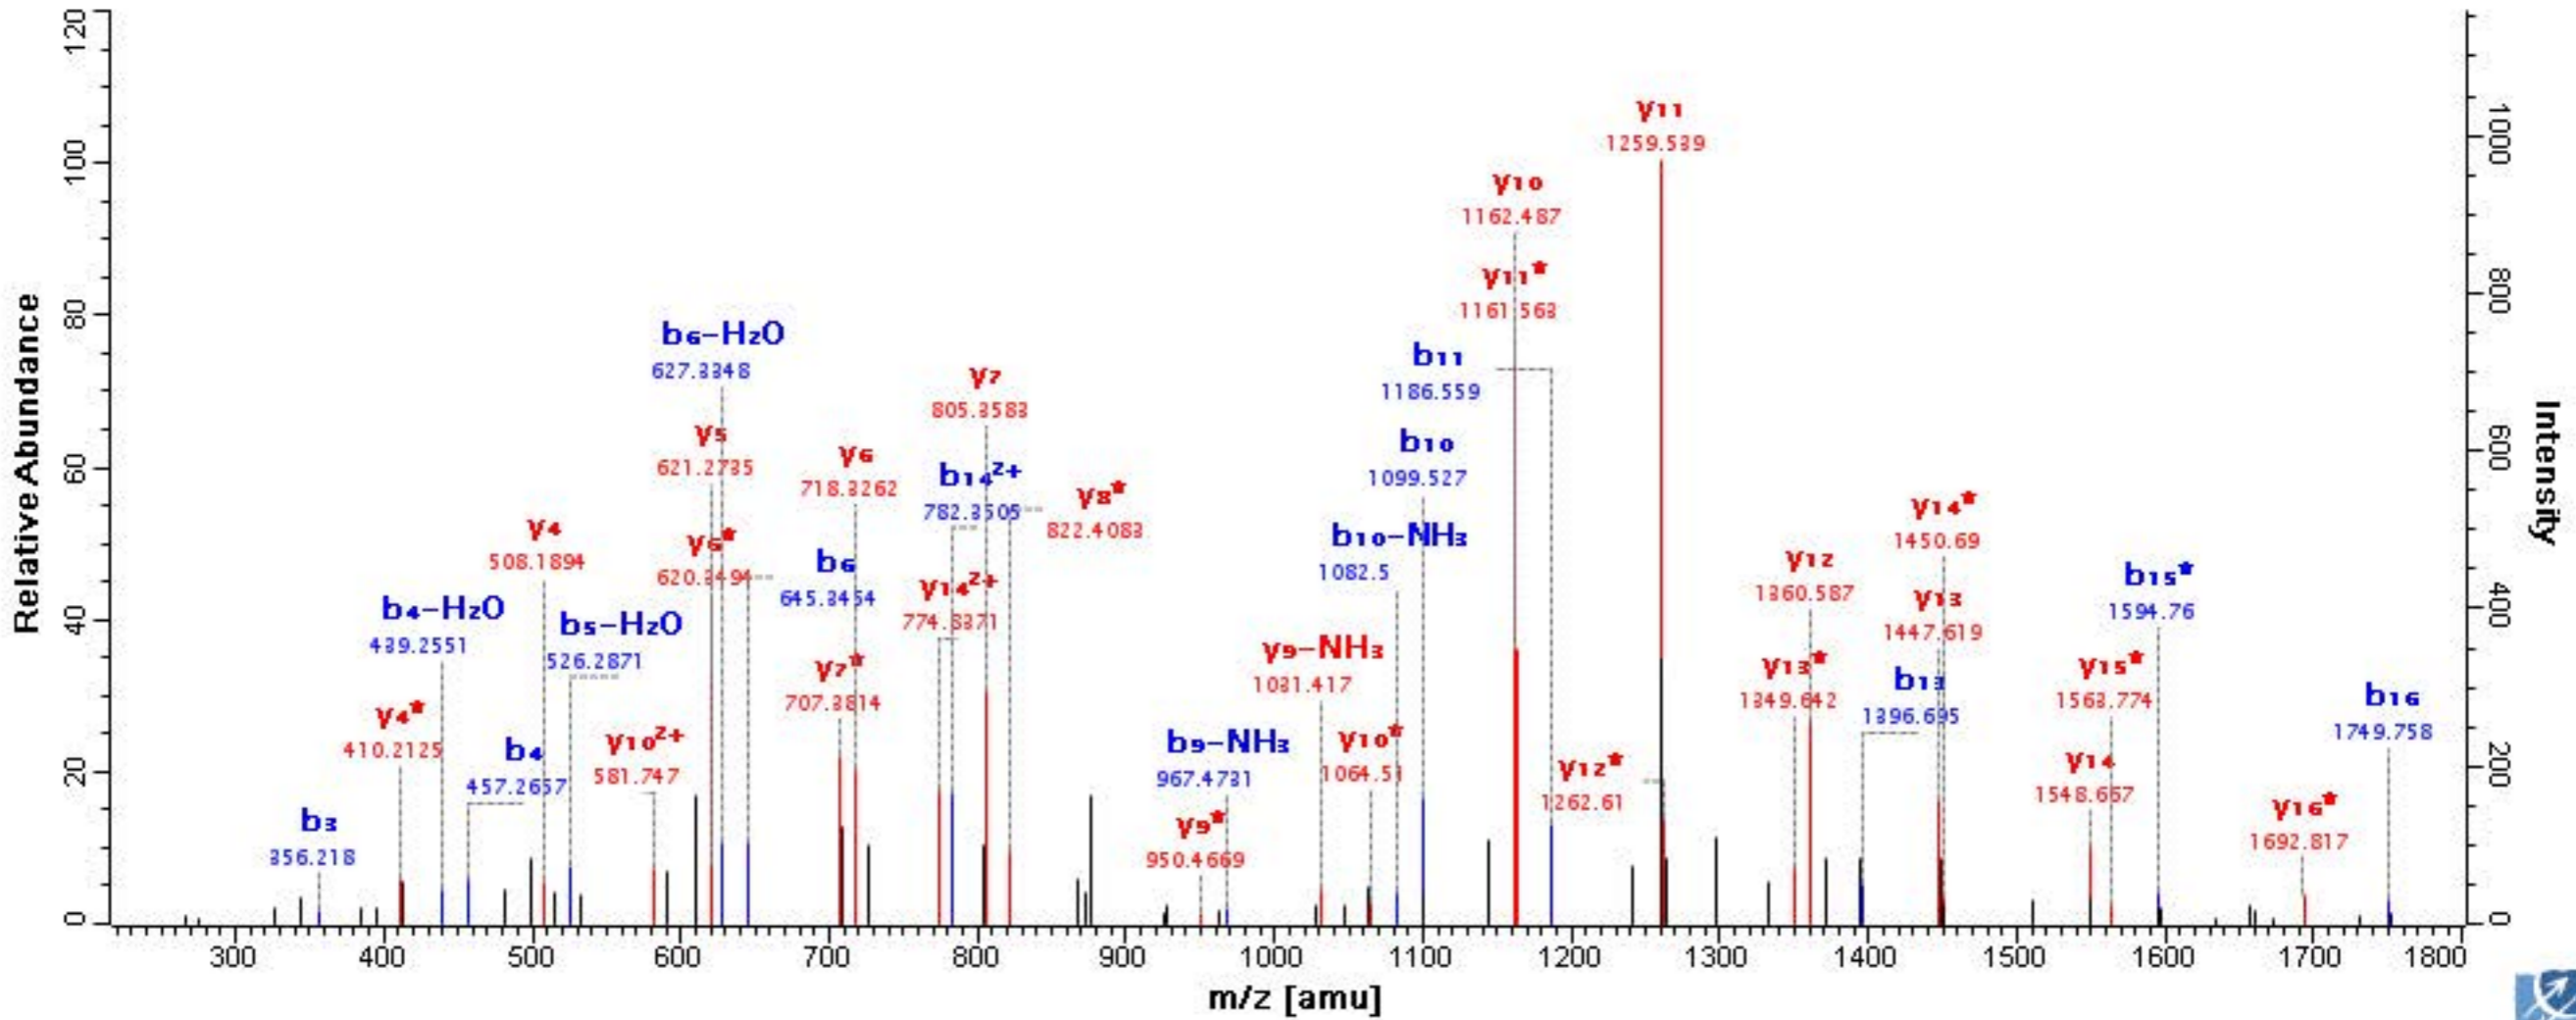

#### precursor information

|                   |                     |
|-------------------|---------------------|
| Mass:             | 1894.85534          |
| m/z:              | System.Collections. |
| Charge:           | System.Collections. |
| Retentiontime:    | System.Collections. |
| Score:            | 202.3416            |
| Mass Error [ppm]: | -0.41016            |
| PEP:              | 3.1651E-59          |
| Precursor Type:   | MULTI               |

| b <sup>2+</sup> ion |          | b ion     |          | seq |   |    | γ ion    |           | γ <sup>2+</sup> ion |           |
|---------------------|----------|-----------|----------|-----|---|----|----------|-----------|---------------------|-----------|
| Δ dalton            | mass     | Δ dalton  | mass     |     |   |    | Δ dalton | mass      | Δ dalton            | mass      |
|                     | 114.0913 |           | 114.0913 | 1   | I | 16 |          |           |                     |           |
|                     | 243.1339 |           | 243.1339 | 2   | E | 15 | 1790.794 |           | 1790.794            |           |
|                     | 356.218  | -0.199473 | 356.218  | 3   | I | 14 | 1661.751 |           | 1661.751            |           |
|                     | 457.2657 | +0.07429  | 457.2657 | 4   | T | 13 | 1548.667 | +0.119139 | 774.8371            | +0.009972 |
|                     | 544.2977 |           | 544.2977 | 5   | S | 12 | 1447.619 | +0.13044  | 1447.619            |           |
|                     | 645.3454 | +0.057388 | 645.3454 | 6   | T | 11 | 1360.587 | +0.059075 | 1360.587            |           |
|                     | 742.3981 |           | 742.3981 | 7   | P | 10 | 1259.539 | +0.071475 | 1259.539            |           |
|                     | 856.4411 |           | 856.4411 | 8   | N | 9  | 1162.487 | +0.150972 | 581.747             | -0.304922 |
|                     | 984.4997 |           | 984.4997 | 9   | Q | 8  | 1048.444 |           | 1048.444            |           |
|                     | 1099.527 | -0.021956 | 1099.527 | 10  | D | 7  | 920.3852 |           | 920.3852            |           |
|                     | 1186.559 | +0.115205 | 1186.559 | 11  | S | 6  | 805.3583 | +0.064394 | 805.3583            |           |
|                     | 1283.611 |           | 1283.611 | 12  | P | 5  | 718.3262 | -0.00984  | 718.3262            |           |
|                     | 1396.695 | +0.005233 | 1396.695 | 13  | I | 4  | 621.2735 | +0.122941 | 621.2735            |           |
| +0.104779           | 782.3505 |           | 1563.694 | 14  | S | 3  | 508.1894 | -0.203823 | 508.1894            |           |
|                     | 1692.736 |           | 1692.736 | 15  | E | 2  | 341.1911 |           | 341.1911            |           |
|                     | 1749.758 | +0.254096 | 1749.758 | 16  | G | 1  | 212.1485 |           | 212.1485            |           |
|                     |          |           |          | 17  | K | 0  | 155.127  |           | 155.127             |           |

#### general information

|                       |             |
|-----------------------|-------------|
| Annotation:           | 15 of 17    |
| AminoAcids Coverag    | 88 %        |
| Intensity Coverage:   | 66 %        |
| Protein Localisation: | 141 ... 157 |



Source: 201 20602\_VR\_Bsu\_TripleSILAC\_pWTPPrkCPrpC\_F20  
 Scannumber: 8730  
 Protein: BSU28090; valS  
 Peptide Score: 157.2  
 Method: ITMS; CID; 3

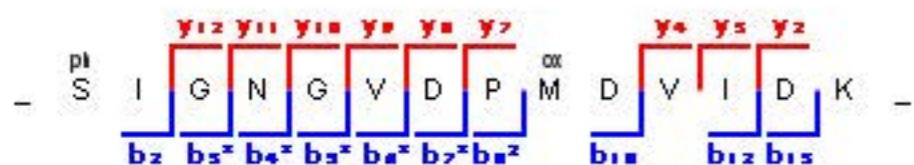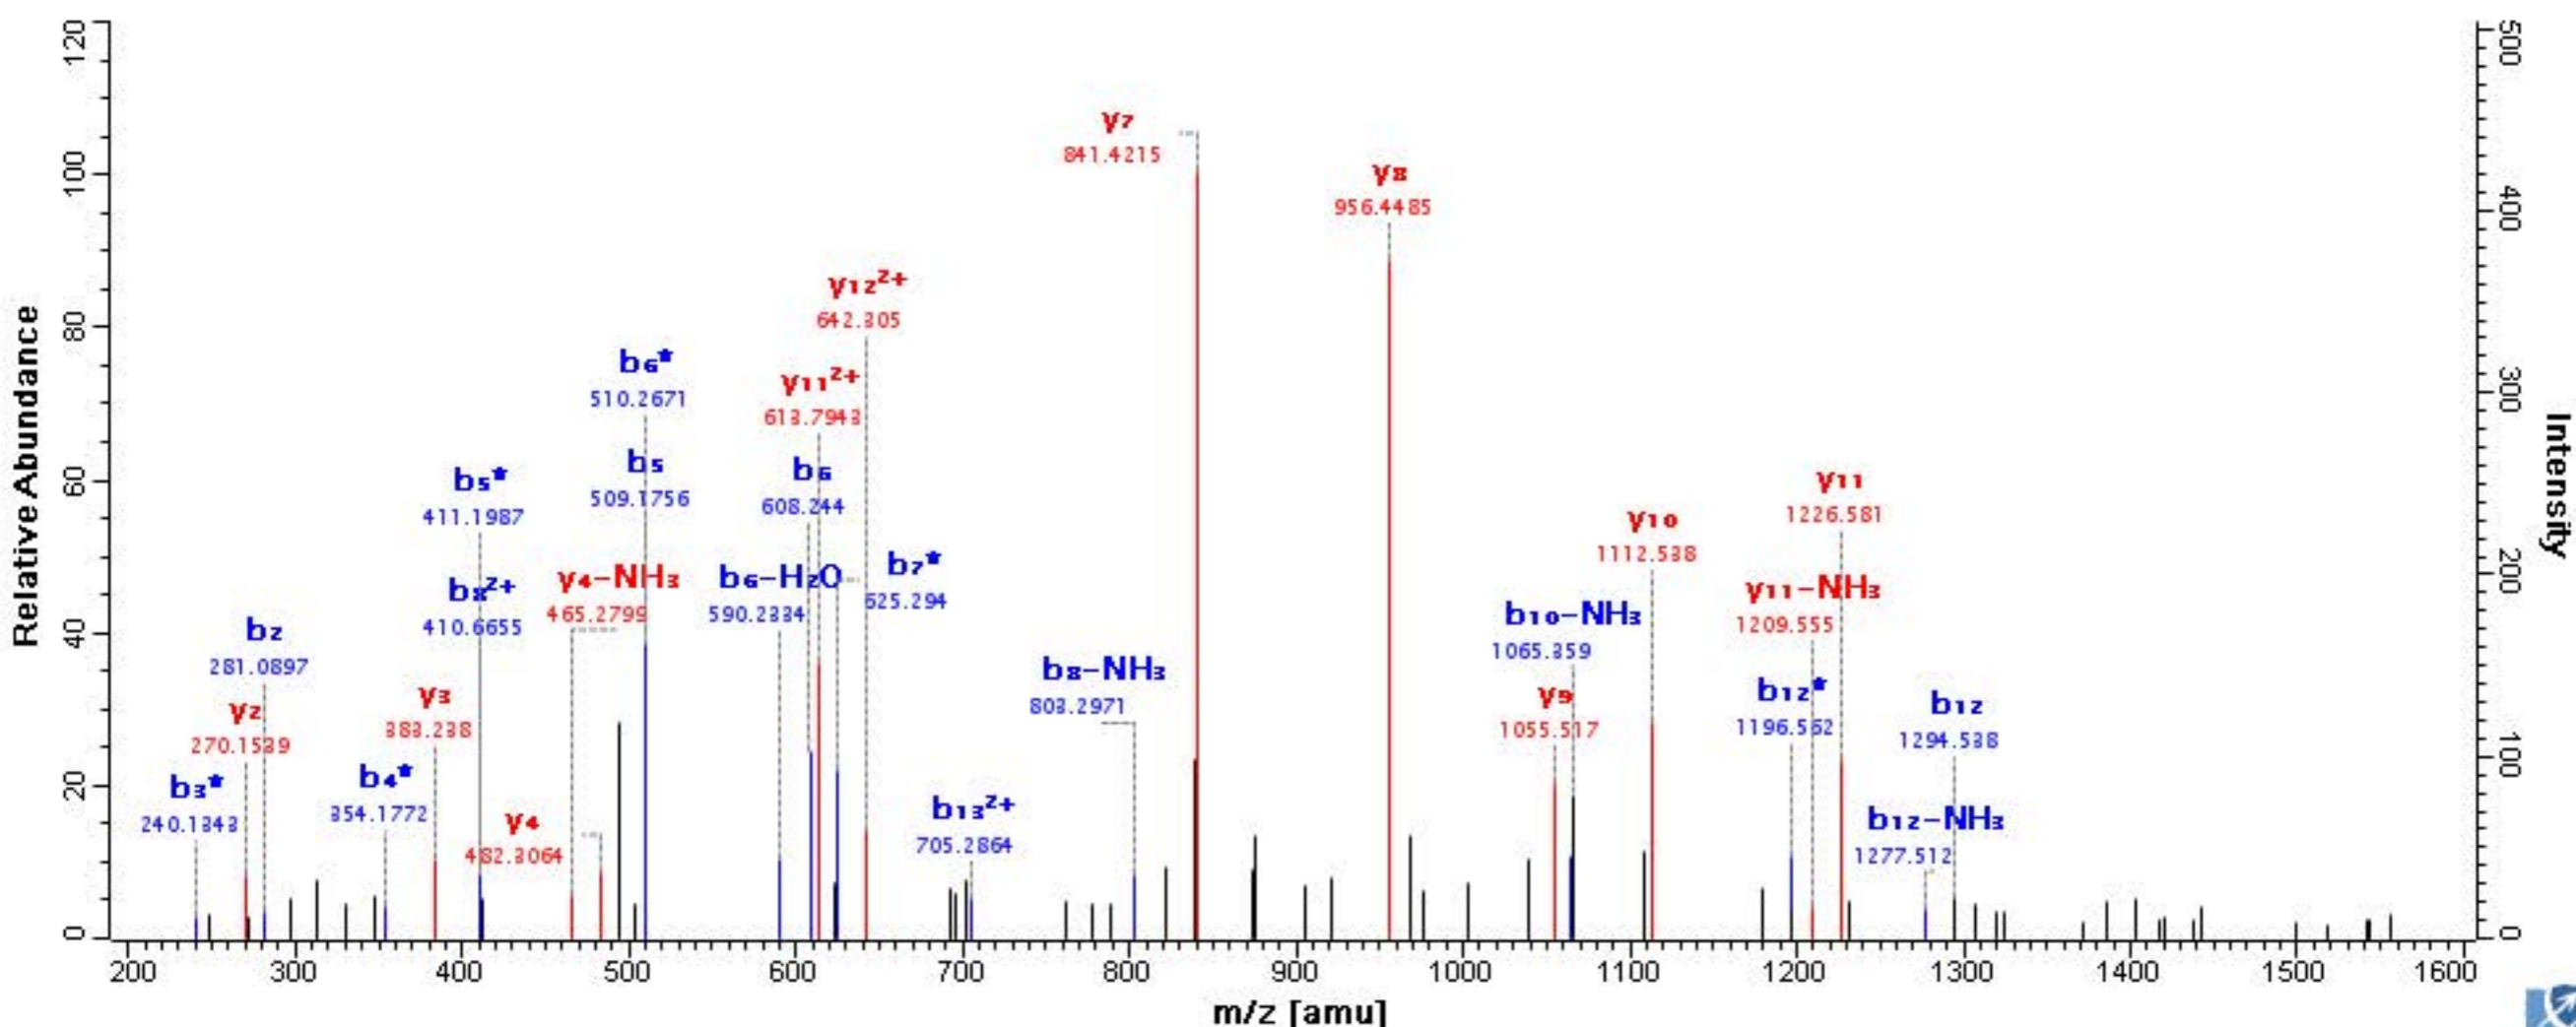

#### precursor information

|                   |                     |
|-------------------|---------------------|
| Mass:             | 1554.66322          |
| m/z:              | System.Collections. |
| Charge:           | System.Collections. |
| Retentiontime:    | System.Collections. |
| Score:            | 157.2003            |
| Mass Error [ppm]: | -0.30131            |
| PEP:              | 3.724E-24           |
| Precursor Type:   | MULTI               |

#### general information

|                       |             |
|-----------------------|-------------|
| Annotation:           | 11 of 14    |
| AminoAcids Coverage:  | 79 %        |
| Intensity Coverage:   | 61 %        |
| Protein Localisation: | 529 ... 542 |

| b <sup>2+</sup> ion |          | b ion     |          | seq |   |    | y ion    |           | y <sup>2+</sup> ion |           |
|---------------------|----------|-----------|----------|-----|---|----|----------|-----------|---------------------|-----------|
| Δ dalton            | mass     | Δ dalton  | mass     |     |   |    | Δ dalton | mass      | Δ dalton            | mass      |
|                     | 168.0056 |           | 168.0056 | 1   | S | 13 |          |           |                     |           |
|                     | 281.0897 | +0.022727 | 281.0897 | 2   | I | 12 | 1396.687 |           | 1396.687            |           |
|                     | 338.1112 |           | 338.1112 | 3   | G | 11 | 1283.603 |           | 642.305             | +0.101912 |
|                     | 452.1541 |           | 452.1541 | 4   | N | 10 | 1226.581 | +0.071554 | 613.7943            | -0.043362 |
|                     | 509.1756 | +0.022505 | 509.1756 | 5   | G | 9  | 1112.538 | -0.041036 | 1112.538            |           |
|                     | 608.244  | +0.113759 | 608.244  | 6   | V | 8  | 1055.517 | +0.080647 | 1055.517            |           |
|                     | 723.2709 |           | 723.2709 | 7   | D | 7  | 956.4485 | -0.045885 | 956.4485            |           |
| -0.431711           | 410.6655 |           | 820.3237 | 8   | P | 6  | 841.4215 | +0.036844 | 841.4215            |           |
|                     | 967.3591 |           | 967.3591 | 9   | M | 5  | 744.3688 |           | 744.3688            |           |
|                     | 1082.386 |           | 1082.386 | 10  | D | 4  | 597.3334 |           | 597.3334            |           |
|                     | 1181.454 |           | 1181.454 | 11  | V | 3  | 482.3064 | +0.08414  | 482.3064            |           |
|                     | 1294.538 | -0.301679 | 1294.538 | 12  | I | 2  | 383.238  | -0.052829 | 383.238             |           |
| +0.147664           | 705.2864 |           | 1409.565 | 13  | D | 1  | 270.1539 | +0.042953 | 270.1539            |           |
|                     |          |           |          | 14  | K | 0  | 155.127  |           | 155.127             |           |

Source: 20120602\_VR\_Bsu\_TripleSILAC\_pWTPrkCPrpC\_F21  
 Scannumber: 14991  
 Protein: BSU04710; rsbY  
 Peptide Score: 235.95  
 Method: ITMS; CID; 3

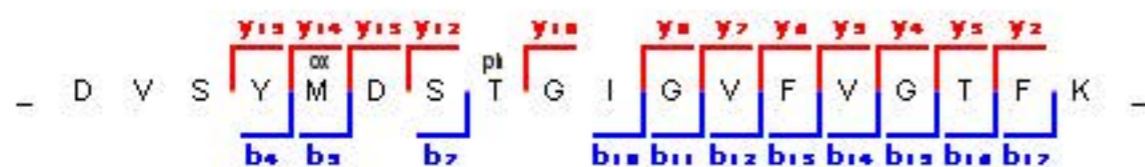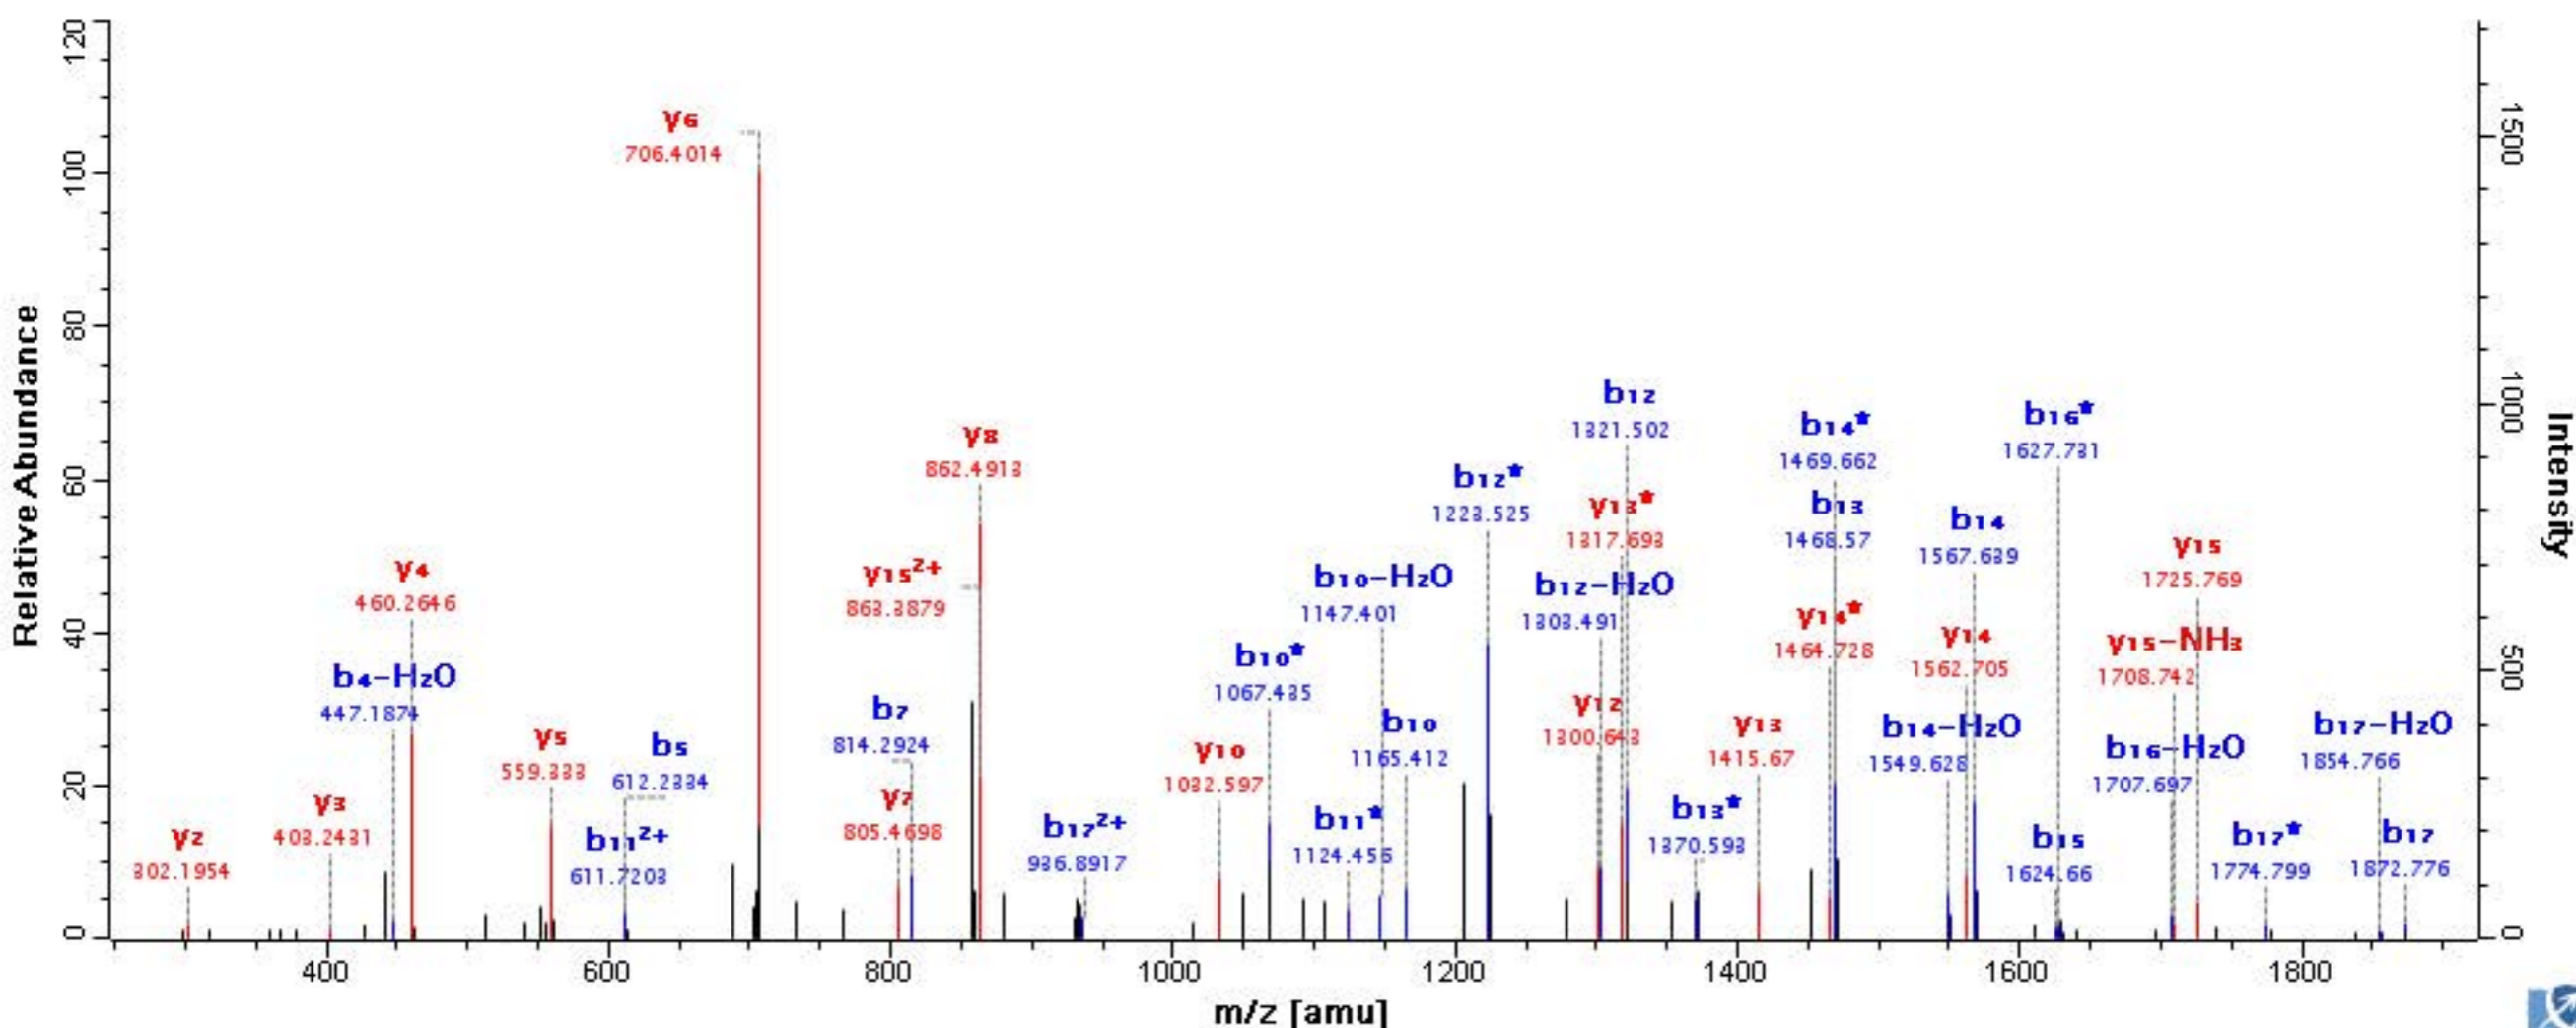

#### precursor information

|                   |                     |
|-------------------|---------------------|
| Mass:             | 2017.87279          |
| m/z:              | System.Collections. |
| Charge:           | System.Collections. |
| Retentiontime:    | System.Collections. |
| Score:            | 235.9495            |
| Mass Error [ppm]: | -0.79917            |
| PEP:              | 3.0587E-106         |
| Precursor Type:   | MULTI               |

#### general information

|                       |           |
|-----------------------|-----------|
| Annotation:           | 14 of 18  |
| AminoAcids Coverage:  | 78 %      |
| Intensity Coverage:   | 63 %      |
| Protein Localisation: | 50 ... 67 |

| b <sup>2+</sup> ion |          | b ion     |          |     | y ion |          | y <sup>2+</sup> ion |           |          |           |
|---------------------|----------|-----------|----------|-----|-------|----------|---------------------|-----------|----------|-----------|
| Δ dalton            | mass     | Δ dalton  | mass     | seq |       | Δ dalton | mass                | Δ dalton  | mass     |           |
|                     | 116.0342 |           | 116.0342 | 1   | D     | 17       |                     |           |          |           |
|                     | 215.1026 |           | 215.1026 | 2   | V     | 16       | 1911.869            |           | 1911.869 |           |
|                     | 302.1347 |           | 302.1347 | 3   | S     | 15       | 1812.801            |           | 1812.801 |           |
|                     | 465.198  |           | 465.198  | 4   | Y     | 14       | 1725.769            | +0.004815 | 863.3879 | +0.099172 |
|                     | 612.2334 | -0.076651 | 612.2334 | 5   | M     | 13       | 1562.705            | -0.00815  | 1562.705 |           |
|                     | 727.2603 |           | 727.2603 | 6   | D     | 12       | 1415.67             | +0.115506 | 1415.67  |           |
|                     | 814.2924 | +0.141477 | 814.2924 | 7   | S     | 11       | 1300.643            | +0.068352 | 1300.643 |           |
|                     | 995.3064 |           | 995.3064 | 8   | T     | 10       | 1213.611            |           | 1213.611 |           |
|                     | 1052.328 |           | 1052.328 | 9   | G     | 9        | 1032.597            | +0.173471 | 1032.597 |           |
|                     | 1165.412 | -0.06827  | 1165.412 | 10  | I     | 8        | 975.5753            |           | 975.5753 |           |
| -0.308576           | 611.7203 |           | 1222.433 | 11  | G     | 7        | 862.4913            | -0.06939  | 862.4913 |           |
|                     | 1321.502 | -0.138616 | 1321.502 | 12  | V     | 6        | 805.4698            | -0.008497 | 805.4698 |           |
|                     | 1468.57  | +0.021974 | 1468.57  | 13  | F     | 5        | 706.4014            | -0.046406 | 706.4014 |           |
|                     | 1567.639 | +0.059517 | 1567.639 | 14  | V     | 4        | 559.333             | +0.033116 | 559.333  |           |
|                     | 1624.66  | +0.117521 | 1624.66  | 15  | G     | 3        | 460.2646            | +0.093626 | 460.2646 |           |
|                     | 1725.708 |           | 1725.708 | 16  | T     | 2        | 403.2431            | +0.262215 | 403.2431 |           |
| -0.371698           | 936.8917 | +0.091761 | 1872.776 | 17  | F     | 1        | 302.1954            | +0.063708 | 302.1954 |           |
|                     |          |           |          | 18  | K     | 0        | 155.127             |           | 155.127  |           |

Source: 20120602\_VR\_Bsu\_TripleSILAC\_pWTPPrkCPrpC\_F21  
 Scannumber: 5774  
 Protein: BSU37120; fba; fba1; fbaA; tsr  
 Peptide Score: 208.68  
 Method: ITMS; CID; 3

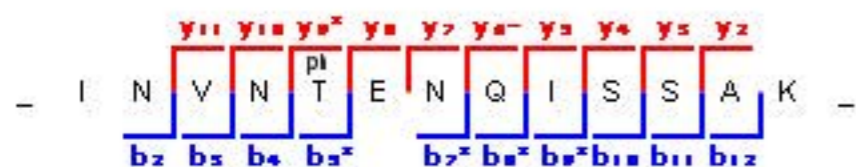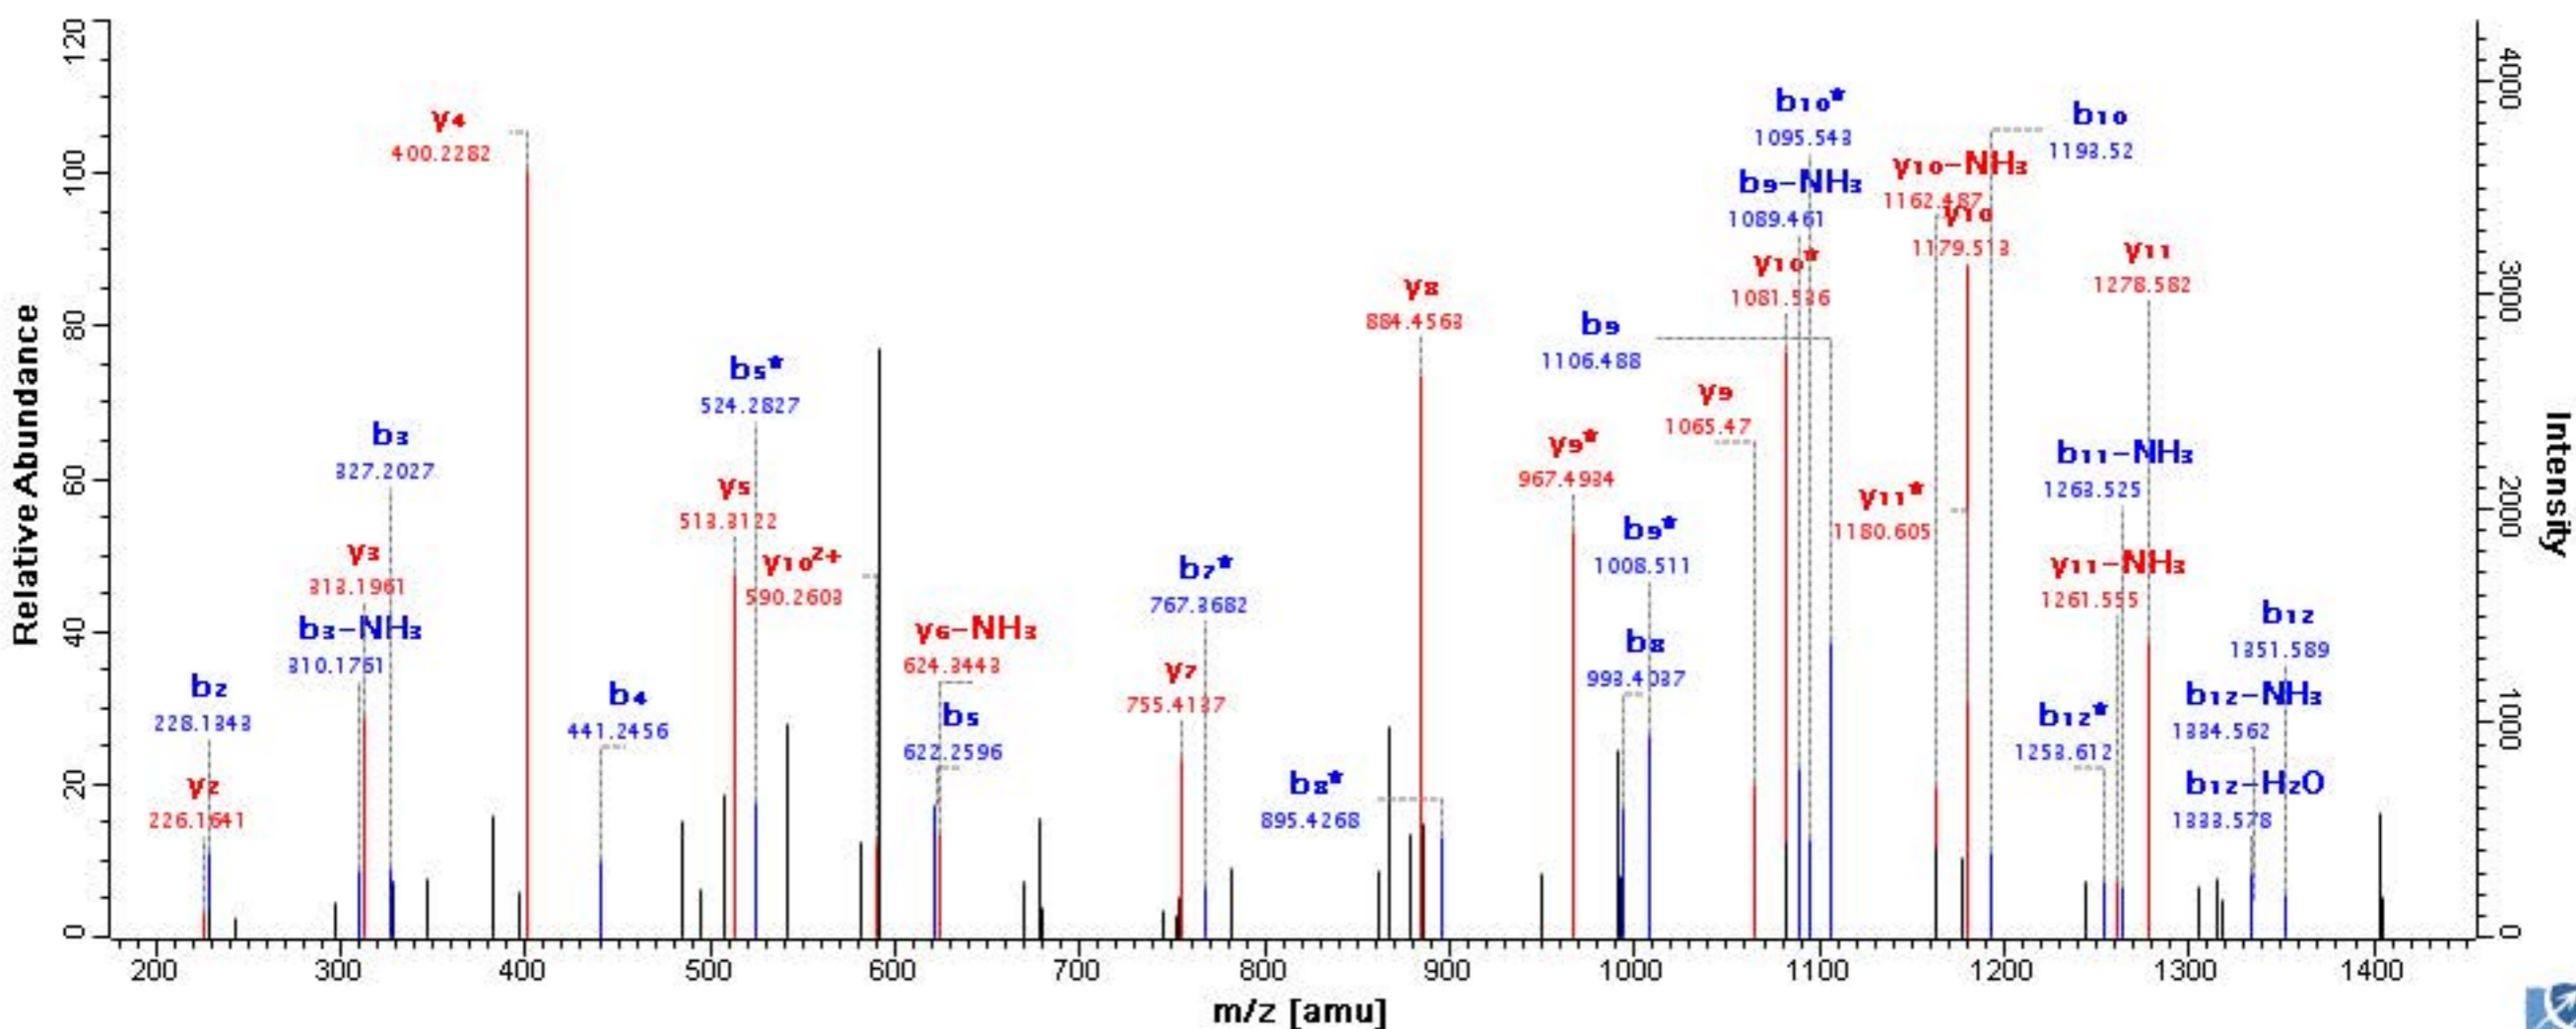

#### precursor information

|                   |                     |
|-------------------|---------------------|
| Mass:             | 1496.68673          |
| m/z:              | System.Collections. |
| Charge:           | System.Collections. |
| Retentiontime:    | System.Collections. |
| Score:            | 208.6752            |
| Mass Error [ppm]: | -0.31069            |
| PEP:              | 1.5416E-58          |
| Precursor Type:   | MULTI               |

#### general information

|                       |             |
|-----------------------|-------------|
| Annotation:           | 11 of 13    |
| AminoAcids Coverag    | 85 %        |
| Intensity Coverage:   | 66 %        |
| Protein Localisation: | 230 ... 242 |

| b ion      |              |    |     |    | γ ion        |            | γ <sup>2+</sup> ion |            |
|------------|--------------|----|-----|----|--------------|------------|---------------------|------------|
| Δ dalton   | mass         |    | seq |    | Δ dalton     | mass       | Δ dalton            | mass       |
|            | 114.09134045 | 1  | I   | 12 |              |            |                     |            |
| +0.0610751 | 228.13426789 | 2  | N   | 11 | 1392.6246133 |            | 1392.6246133        |            |
| -0.0367883 | 327.20268181 | 3  | V   | 10 | 1278.5816859 | +0.1049596 | 1278.5816859        |            |
| +0.0680504 | 441.24560926 | 4  | N   | 9  | 1179.513272  | +0.0126069 | 590.26027421        | -0.0678914 |
| -0.4806264 | 622.25961814 | 5  | T   | 8  | 1065.4703445 | +0.1382981 | 1065.4703445        |            |
|            | 751.30221124 | 6  | E   | 7  | 884.45633563 | +0.1110472 | 884.45633563        |            |
|            | 865.34513868 | 7  | N   | 6  | 755.41374253 | -0.0321507 | 755.41374253        |            |
| +0.0209054 | 993.40371619 | 8  | Q   | 5  | 641.37081508 |            | 641.37081508        |            |
| +0.1008429 | 1106.4877802 | 9  | I   | 4  | 513.31223757 | +0.0769836 | 513.31223757        |            |
| +0.0874912 | 1193.5198086 | 10 | S   | 3  | 400.22817359 | +0.1440798 | 400.22817359        |            |
|            | 1280.551837  | 11 | S   | 2  | 313.19614518 | -0.0690395 | 313.19614518        |            |
| +0.0615619 | 1351.5889508 | 12 | A   | 1  | 226.16411677 | -0.0021295 | 226.16411677        |            |
|            |              | 13 | K   | 0  | 155.12700298 |            | 155.12700298        |            |

Source: 201 20602\_VR\_Bsu\_TripleSILAC\_pWTPPrkCPrpC\_F22  
 Scannumber: 10096  
 Protein: BSU16500; tsf  
 Peptide Score: 105.06  
 Method: ITMS; CID; 3

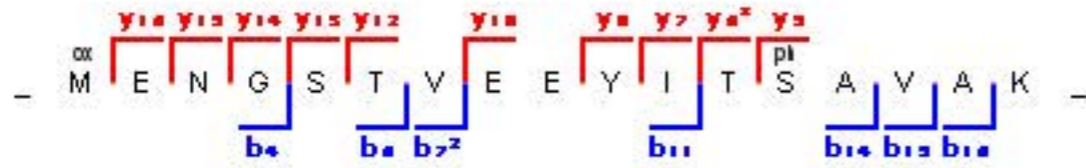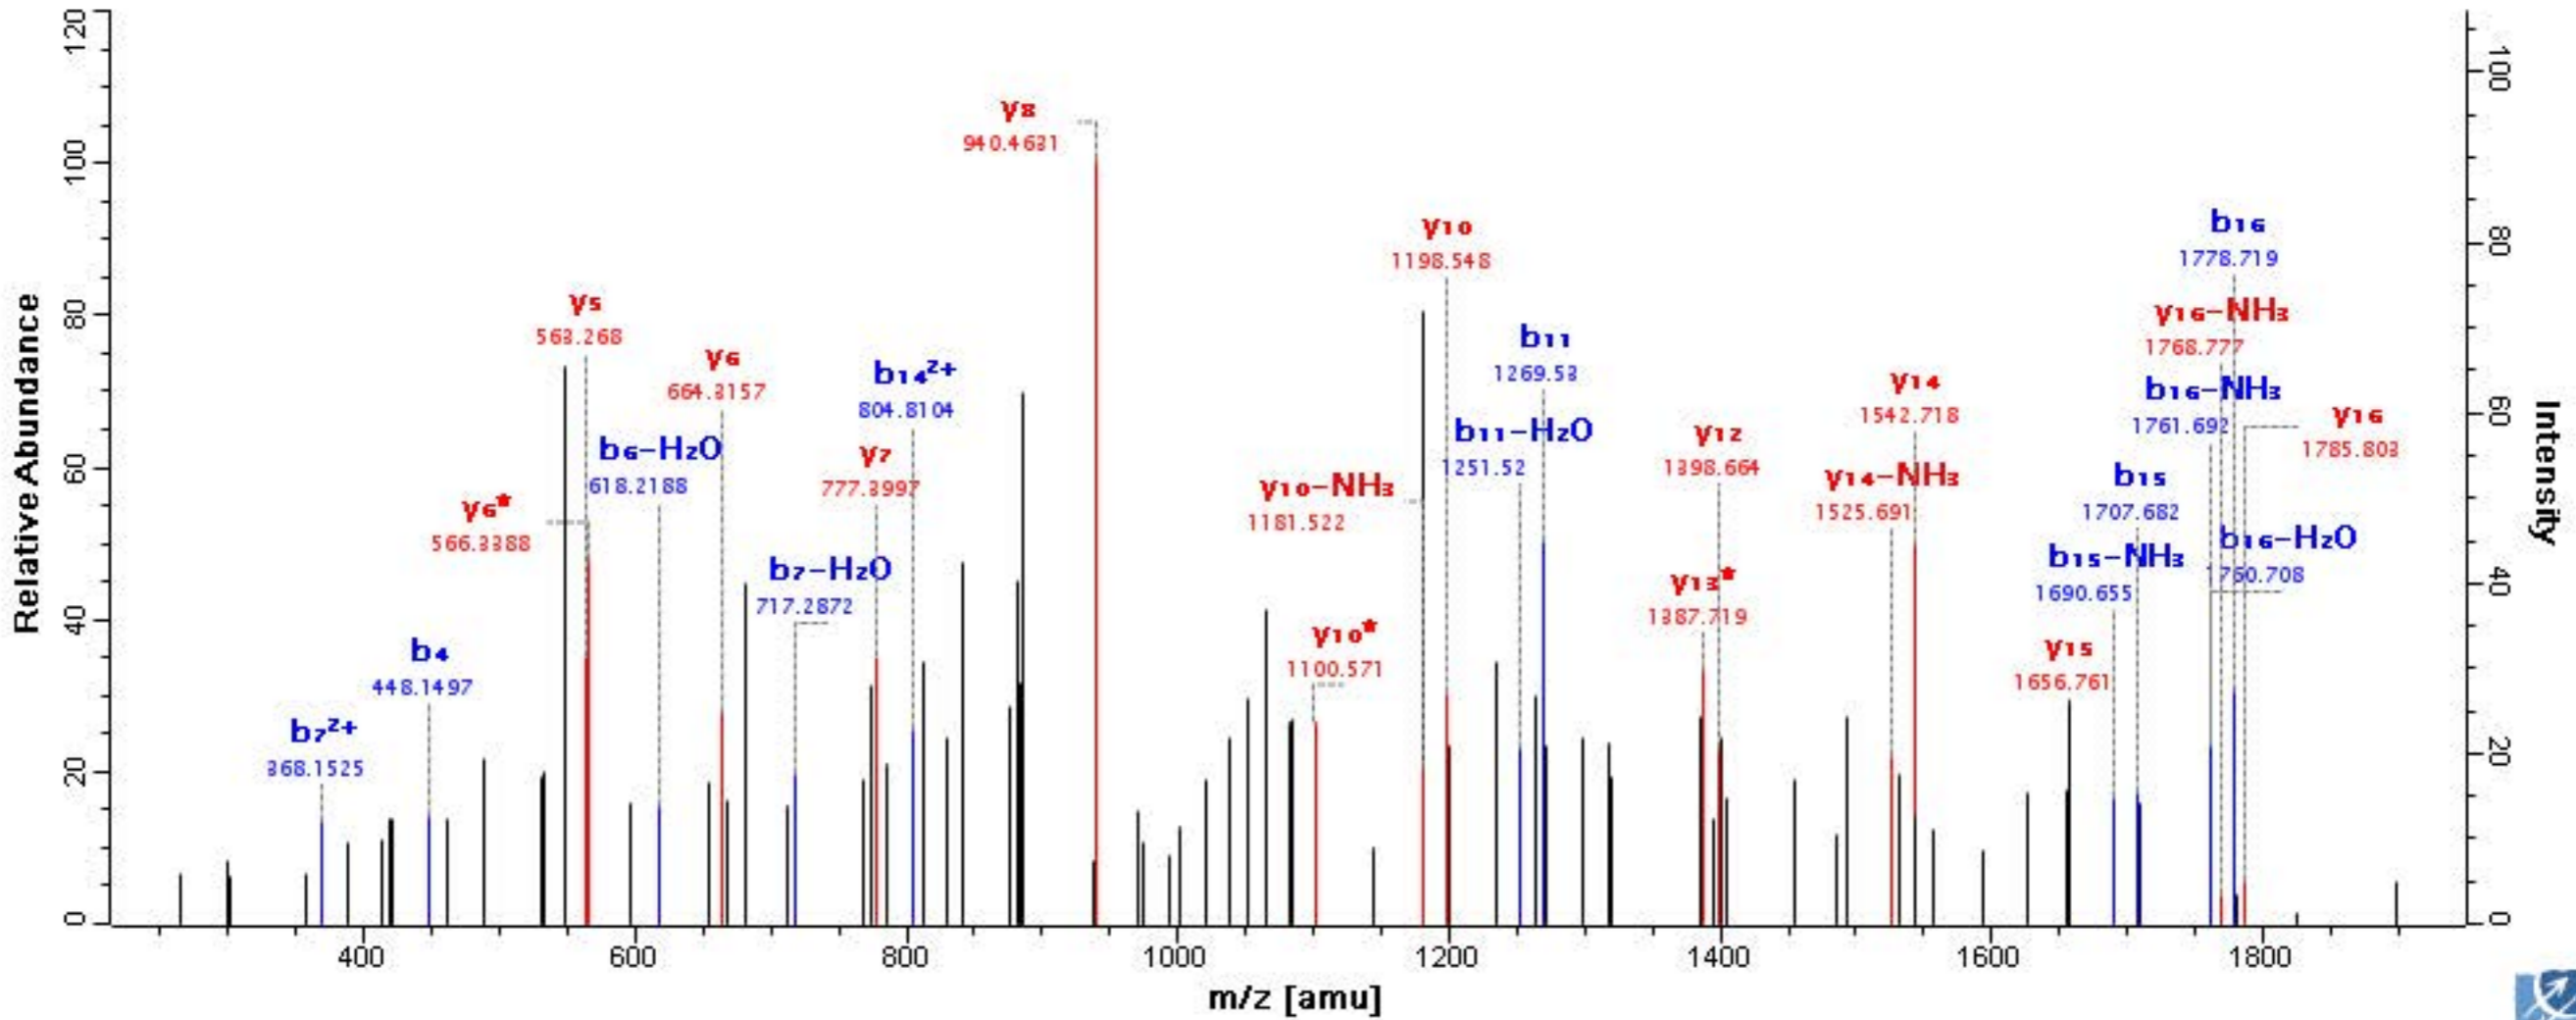

#### precursor information

|                   |                     |
|-------------------|---------------------|
| Mass:             | 1923.81749          |
| m/z:              | System.Collections. |
| Charge:           | System.Collections. |
| Retentiontime:    | System.Collections. |
| Score:            | 105.0601            |
| Mass Error [ppm]: | 0.10277             |
| PEP:              | 7.0915E-08          |
| Precursor Type:   | MULTI               |

| b <sup>2+</sup> ion |              | b ion      |              |    |     |    | y ion        |            |
|---------------------|--------------|------------|--------------|----|-----|----|--------------|------------|
| Δ dalton            | mass         | Δ dalton   | mass         |    | seq |    | Δ dalton     | mass       |
|                     | 148.04267569 |            | 148.04267569 | 1  | M   | 16 |              |            |
|                     | 277.08526879 |            | 277.08526879 | 2  | E   | 15 | 1785.8033655 | +0.1381628 |
|                     | 391.12819624 |            | 391.12819624 | 3  | N   | 14 | 1656.7607725 | -0.3251035 |
|                     | 448.14965996 | +0.1422712 | 448.14965996 | 4  | G   | 13 | 1542.717845  | +0.0872087 |
|                     | 535.18168837 |            | 535.18168837 | 5  | S   | 12 | 1485.6963813 |            |
|                     | 636.22936685 |            | 636.22936685 | 6  | T   | 11 | 1398.6643529 | +0.0534206 |
| -0.0336932          | 368.15252861 |            | 735.29778076 | 7  | V   | 10 | 1297.6166744 |            |
|                     | 864.34037386 |            | 864.34037386 | 8  | E   | 9  | 1198.5482605 | -0.4856384 |
|                     | 993.38296695 |            | 993.38296695 | 9  | E   | 8  | 1069.5056674 |            |
|                     | 1156.4462955 |            | 1156.4462955 | 10 | Y   | 7  | 940.46307429 | -0.0665289 |
|                     | 1269.5303595 | +0.0784052 | 1269.5303595 | 11 | I   | 6  | 777.39974575 | -0.0364035 |
|                     | 1370.5780379 |            | 1370.5780379 | 12 | T   | 5  | 664.31568177 | +0.107475  |
|                     | 1537.5763968 |            | 1537.5763968 | 13 | S   | 4  | 563.26800329 | +0.2327291 |
| +0.4218453          | 804.81039351 |            | 1608.6135106 | 14 | A   | 3  | 396.26964448 |            |
|                     | 1707.6819245 | +0.2032074 | 1707.6819245 | 15 | V   | 2  | 325.23253069 |            |
|                     | 1778.7190383 | +0.1863573 | 1778.7190383 | 16 | A   | 1  | 226.16411677 |            |
|                     |              |            |              | 17 | K   | 0  | 155.12700298 |            |

#### general information

|                       |             |
|-----------------------|-------------|
| Annotation:           | 14 of 17    |
| AminoAcids Coverag    | 82 %        |
| Intensity Coverage:   | 33 %        |
| Protein Localisation: | 115 ... 131 |

Source: 20120602\_VR\_Bsu\_TripleSILAC\_pWTPPrkCPrpC\_F22  
 Scannumber: 7086  
 Protein: argJ; BSU11200  
 Peptide Score: 136.3  
 Method: ITMS; CID; 3

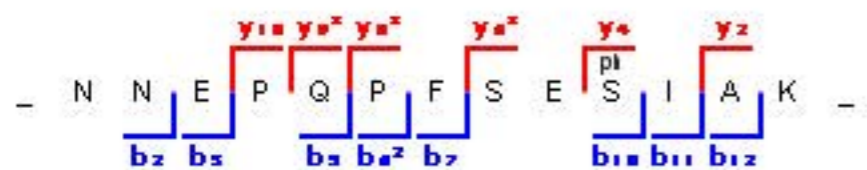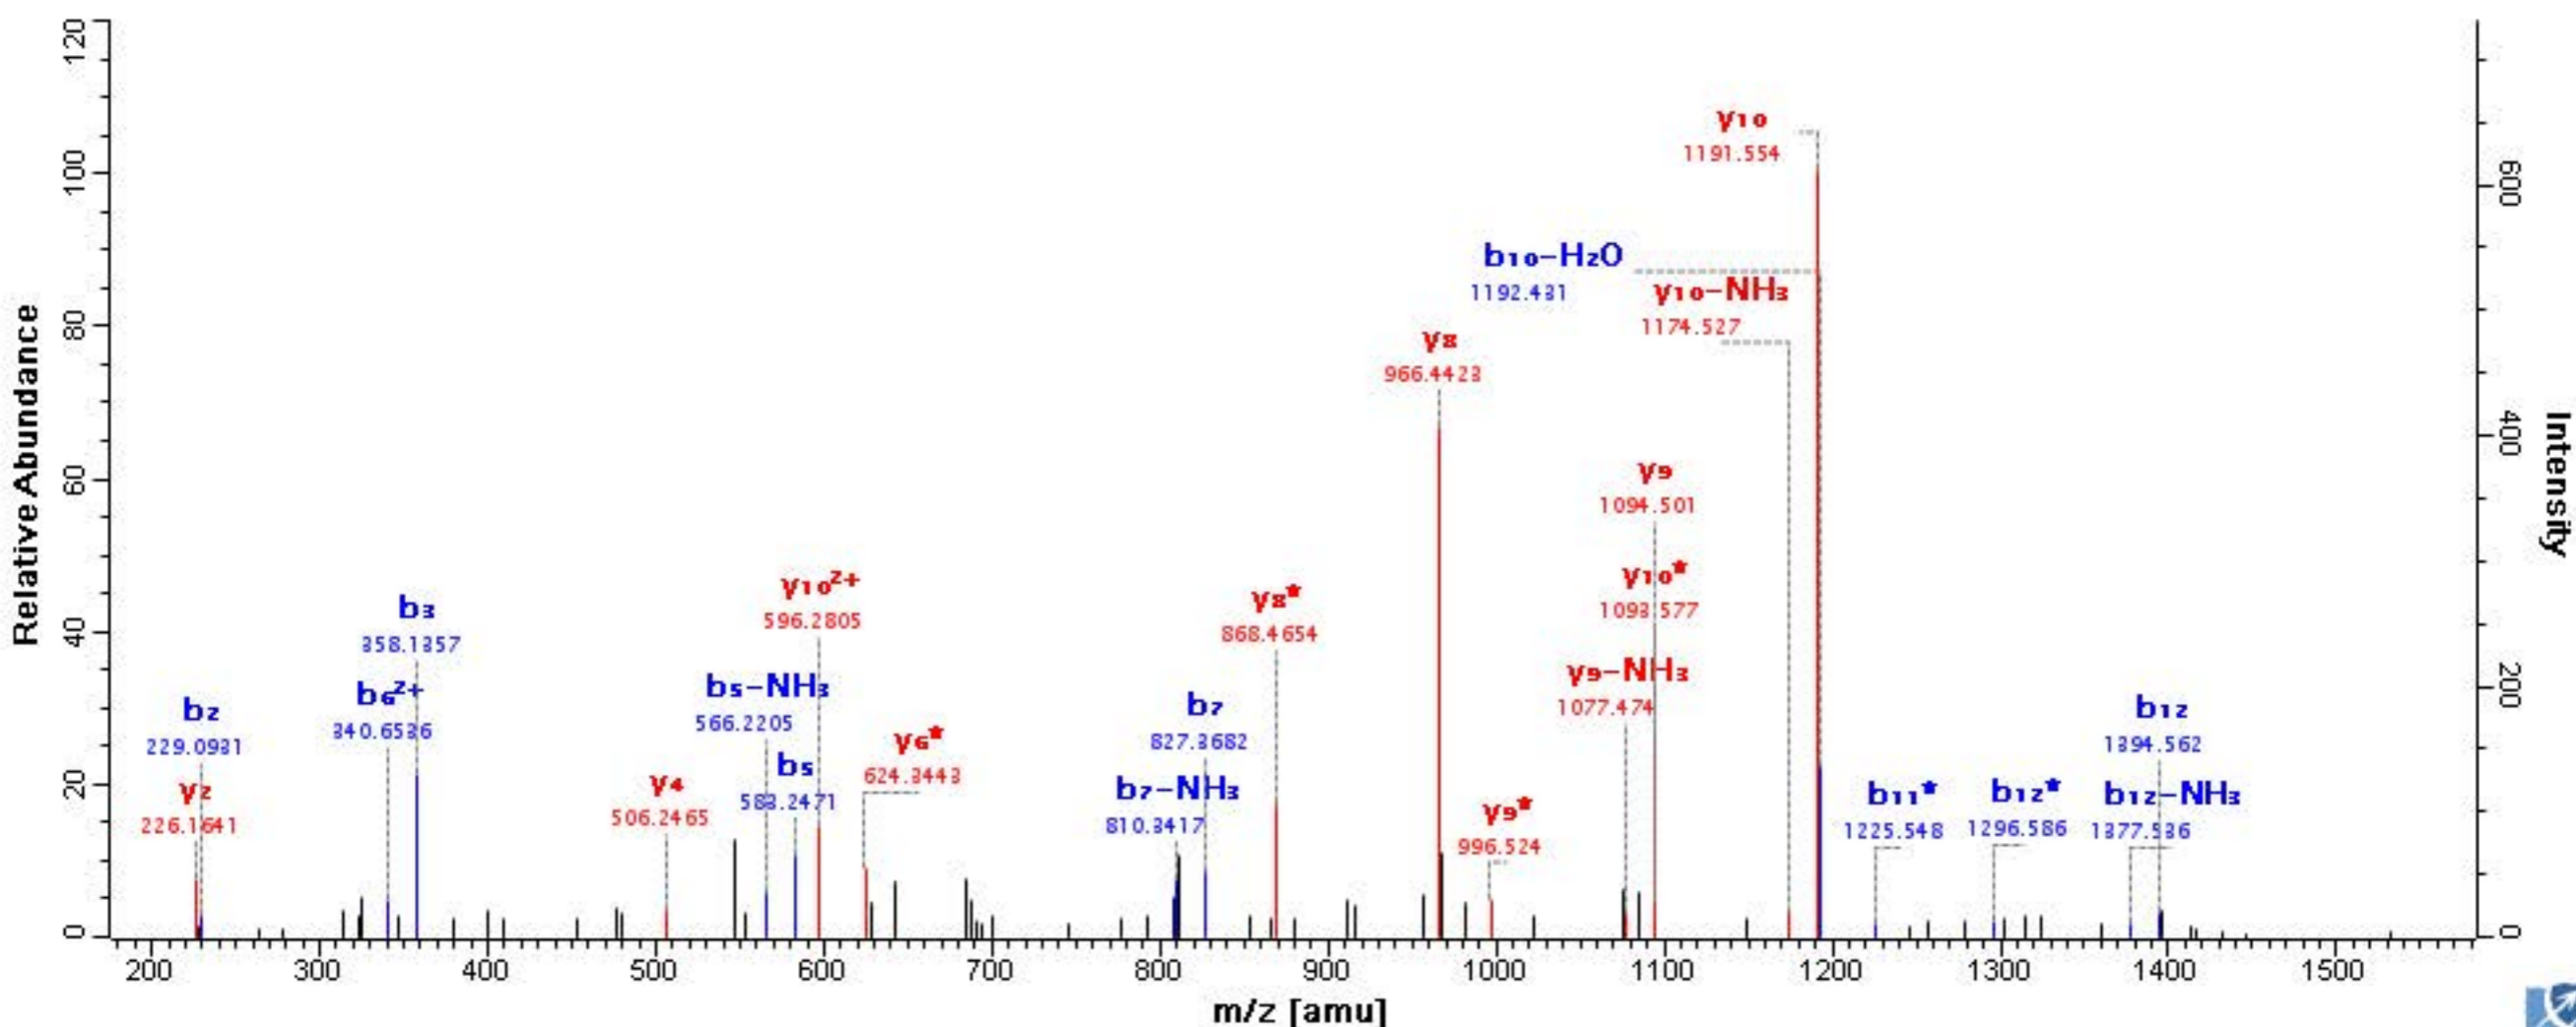

**precursor information**

|                   |                     |
|-------------------|---------------------|
| Mass:             | 1539.6605           |
| m/z:              | System.Collections. |
| Charge:           | System.Collections. |
| Retentiontime:    | System.Collections. |
| Score:            | 136.2988            |
| Mass Error [ppm]: | -0.098316           |
| PEP:              | 6.5382E-14          |
| Precursor Type:   | MULTI               |

**general information**

|                       |             |
|-----------------------|-------------|
| Annotation:           | 10 of 13    |
| AminoAcids Coverag    | 77 %        |
| Intensity Coverage:   | 64 %        |
| Protein Localisation: | 353 ... 365 |

| b <sup>2+</sup> ion |          | b ion     |          |    | seq |    | γ ion    |           | γ <sup>2+</sup> ion |          |
|---------------------|----------|-----------|----------|----|-----|----|----------|-----------|---------------------|----------|
| Δ dalton            | mass     | Δ dalton  | mass     |    |     |    | Δ dalton | mass      | Δ dalton            | mass     |
|                     | 115.0502 |           | 115.0502 | 1  | N   | 12 |          |           |                     |          |
|                     | 229.0931 | +0.046227 | 229.0931 | 2  | N   | 11 | 1434.639 |           | 1434.639            |          |
|                     | 358.1357 | -0.046308 | 358.1357 | 3  | E   | 10 | 1320.596 |           | 1320.596            |          |
|                     | 455.1885 |           | 455.1885 | 4  | P   | 9  | 1191.554 | +0.092194 | 596.2805            | +0.15574 |
|                     | 583.2471 | +0.103093 | 583.2471 | 5  | Q   | 8  | 1094.501 | +0.342345 | 1094.501            |          |
| +0.471996           | 340.6536 |           | 680.2998 | 6  | P   | 7  | 966.4423 | +0.032698 | 966.4423            |          |
|                     | 827.3682 | +0.087811 | 827.3682 | 7  | F   | 6  | 869.3896 |           | 869.3896            |          |
|                     | 914.4003 |           | 914.4003 | 8  | S   | 5  | 722.3212 |           | 722.3212            |          |
|                     | 1043.443 |           | 1043.443 | 9  | E   | 4  | 635.2891 |           | 635.2891            |          |
|                     | 1210.441 |           | 1210.441 | 10 | S   | 3  | 506.2465 | +0.066632 | 506.2465            |          |
|                     | 1323.525 |           | 1323.525 | 11 | I   | 2  | 339.2482 |           | 339.2482            |          |
|                     | 1394.562 | -0.027856 | 1394.562 | 12 | A   | 1  | 226.1641 | +0.168296 | 226.1641            |          |
|                     |          |           |          | 13 | K   | 0  | 155.127  |           | 155.127             |          |

Source: 20120602\_VR\_Bsu\_TripleSILAC\_pWTPPrkCPrpC\_F22  
 Scannumber: 8981  
 Protein: BSU32260; hom; tdm  
 Peptide Score: 194.48  
 Method: ITMS; CID; 3

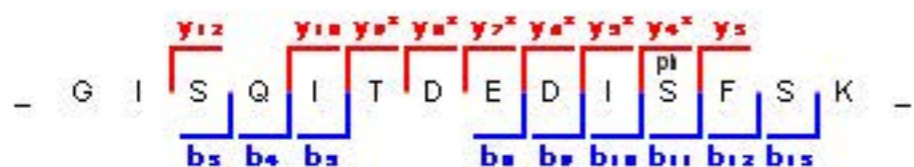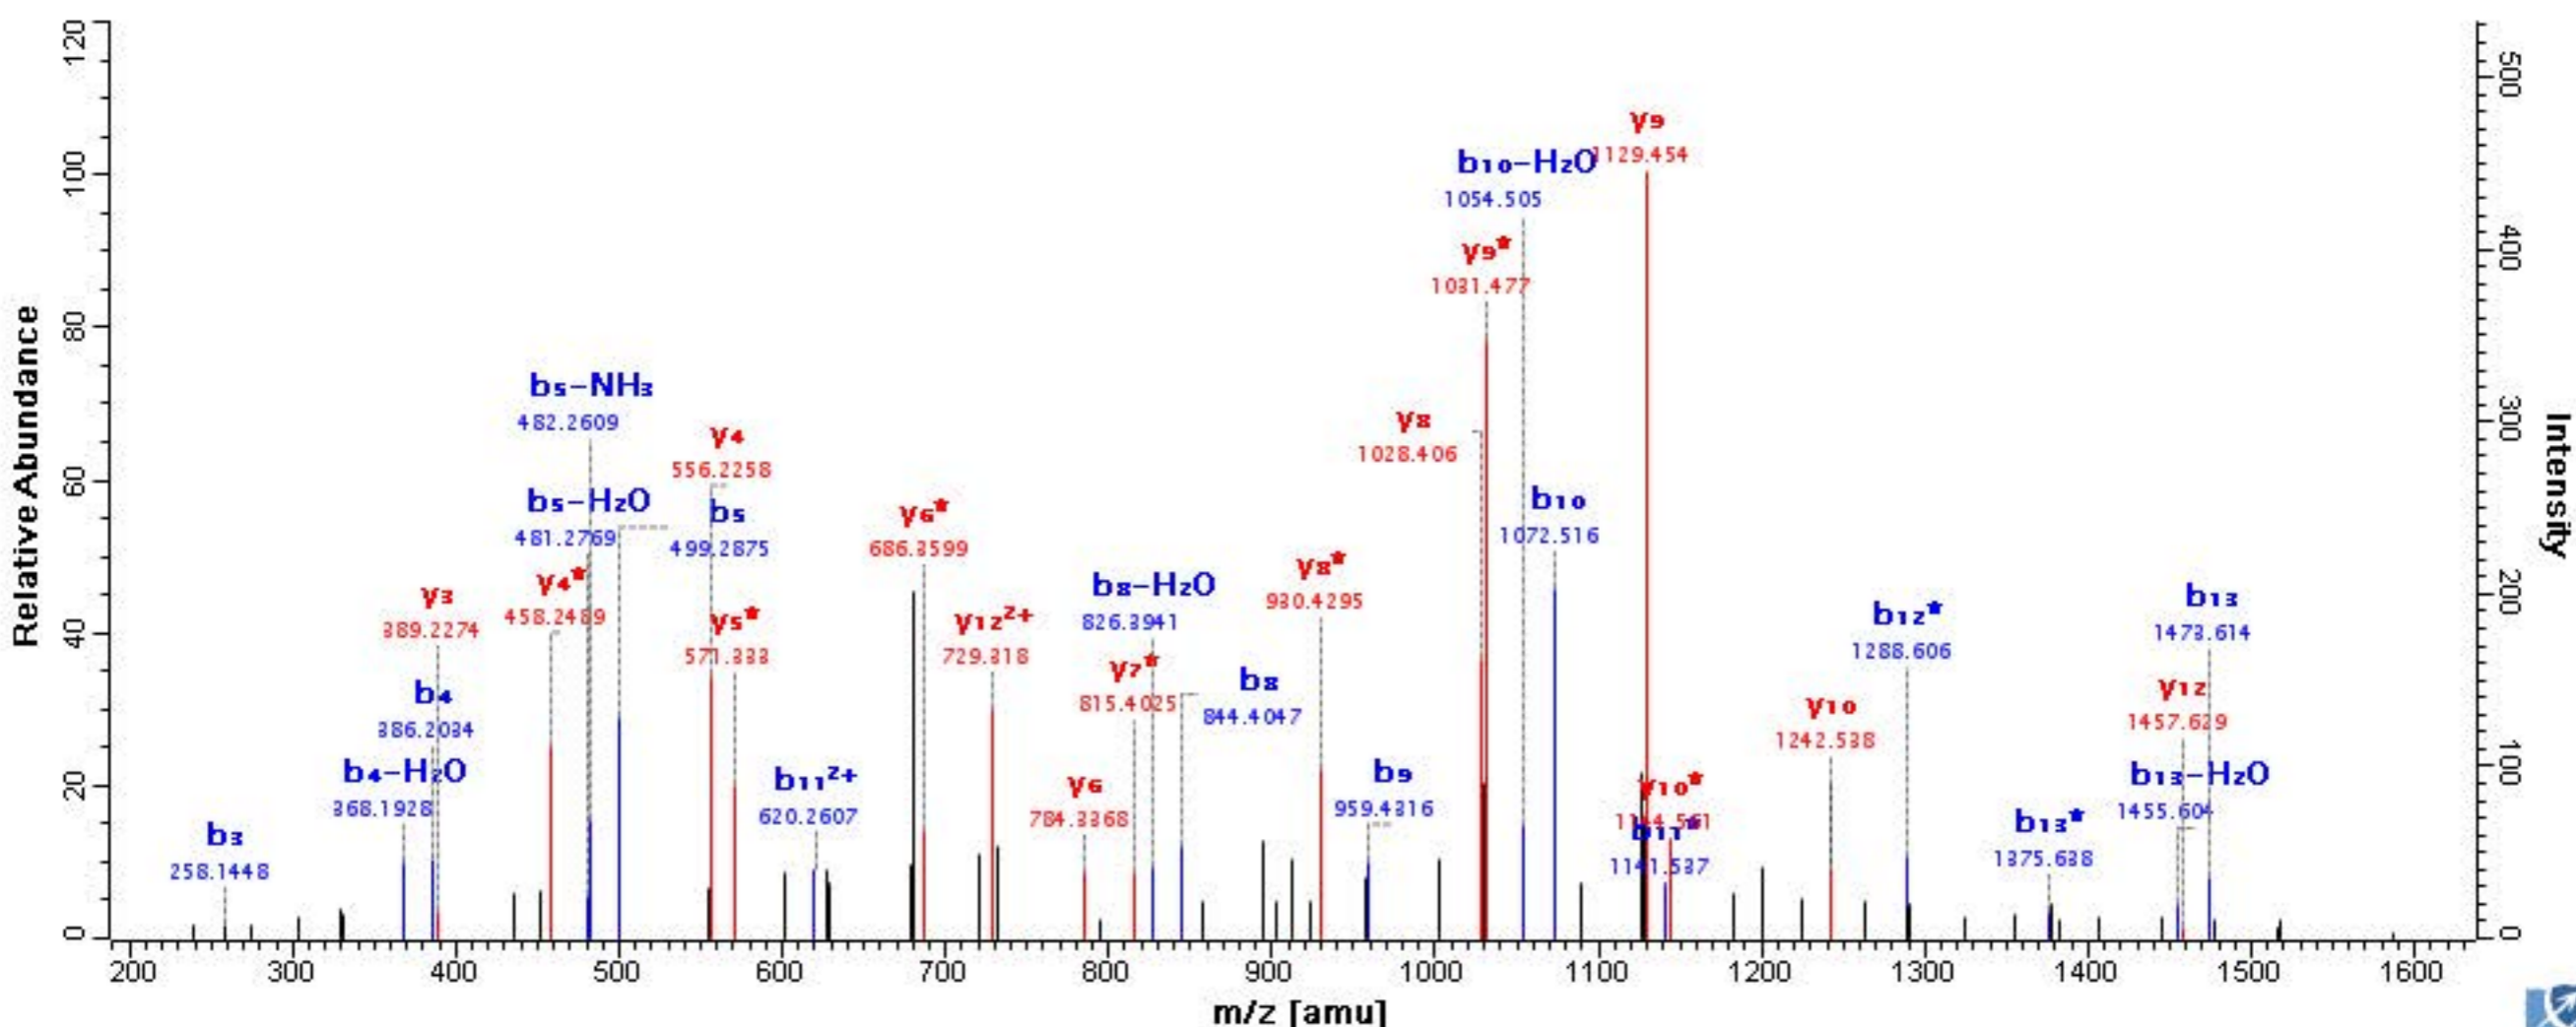

#### precursor information

|                   |                     |
|-------------------|---------------------|
| Mass:             | 1618.71271          |
| m/z:              | System.Collections. |
| Charge:           | System.Collections. |
| Retentiontime:    | System.Collections. |
| Score:            | 194.4753            |
| Mass Error [ppm]: | -0.021827           |
| PEP:              | 1.7443E-49          |
| Precursor Type:   | MULTI               |

#### general information

|                       |             |
|-----------------------|-------------|
| Annotation:           | 11 of 14    |
| AminoAcids Coverage:  | 79 %        |
| Intensity Coverage:   | 63 %        |
| Protein Localisation: | 227 ... 240 |

| b <sup>2+</sup> ion |          | b ion     |          | seq      |      |          | y ion    |           | y <sup>2+</sup> ion |           |
|---------------------|----------|-----------|----------|----------|------|----------|----------|-----------|---------------------|-----------|
| Δ dalton            | mass     | Δ dalton  | mass     | Δ dalton | mass | Δ dalton | mass     | Δ dalton  | mass                |           |
|                     | 58.02874 |           | 58.02874 | 1        | G    | 13       |          |           |                     |           |
|                     | 171.1128 |           | 171.1128 | 2        | I    | 12       | 1570.713 |           | 1570.713            |           |
|                     | 258.1448 | +0.083866 | 258.1448 | 3        | S    | 11       | 1457.629 | -0.145908 | 729.318             | +0.074043 |
|                     | 386.2034 | +0.065023 | 386.2034 | 4        | Q    | 10       | 1370.597 |           | 1370.597            |           |
|                     | 499.2875 | +0.017519 | 499.2875 | 5        | I    | 9        | 1242.538 | +0.288448 | 1242.538            |           |
|                     | 600.3352 |           | 600.3352 | 6        | T    | 8        | 1129.454 | -0.012131 | 1129.454            |           |
|                     | 715.3621 |           | 715.3621 | 7        | D    | 7        | 1028.406 | +0.231836 | 1028.406            |           |
|                     | 844.4047 | -0.101161 | 844.4047 | 8        | E    | 6        | 913.3794 |           | 913.3794            |           |
|                     | 959.4316 | -0.073783 | 959.4316 | 9        | D    | 5        | 784.3368 | -0.013935 | 784.3368            |           |
|                     | 1072.516 | -0.005442 | 1072.516 | 10       | I    | 4        | 669.3099 |           | 669.3099            |           |
| -0.32164            | 620.2607 |           | 1239.514 | 11       | S    | 3        | 556.2258 | +0.193324 | 556.2258            |           |
|                     | 1386.582 |           | 1386.582 | 12       | F    | 2        | 389.2274 | +0.185702 | 389.2274            |           |
|                     | 1473.614 | -0.151972 | 1473.614 | 13       | S    | 1        | 242.159  |           | 242.159             |           |
|                     |          |           |          | 14       | K    | 0        | 155.127  |           | 155.127             |           |

Source: 20120602\_VR\_Bsu\_TripleSILAC\_pWTPPrkCPrpC\_F22  
 Scannumber: 9397  
 Protein: BSU00730; cysK  
 Peptide Score: 74.05  
 Method: ITMS; CID; 3

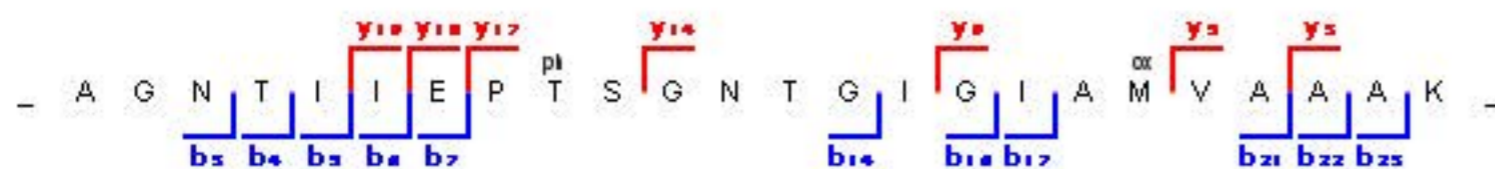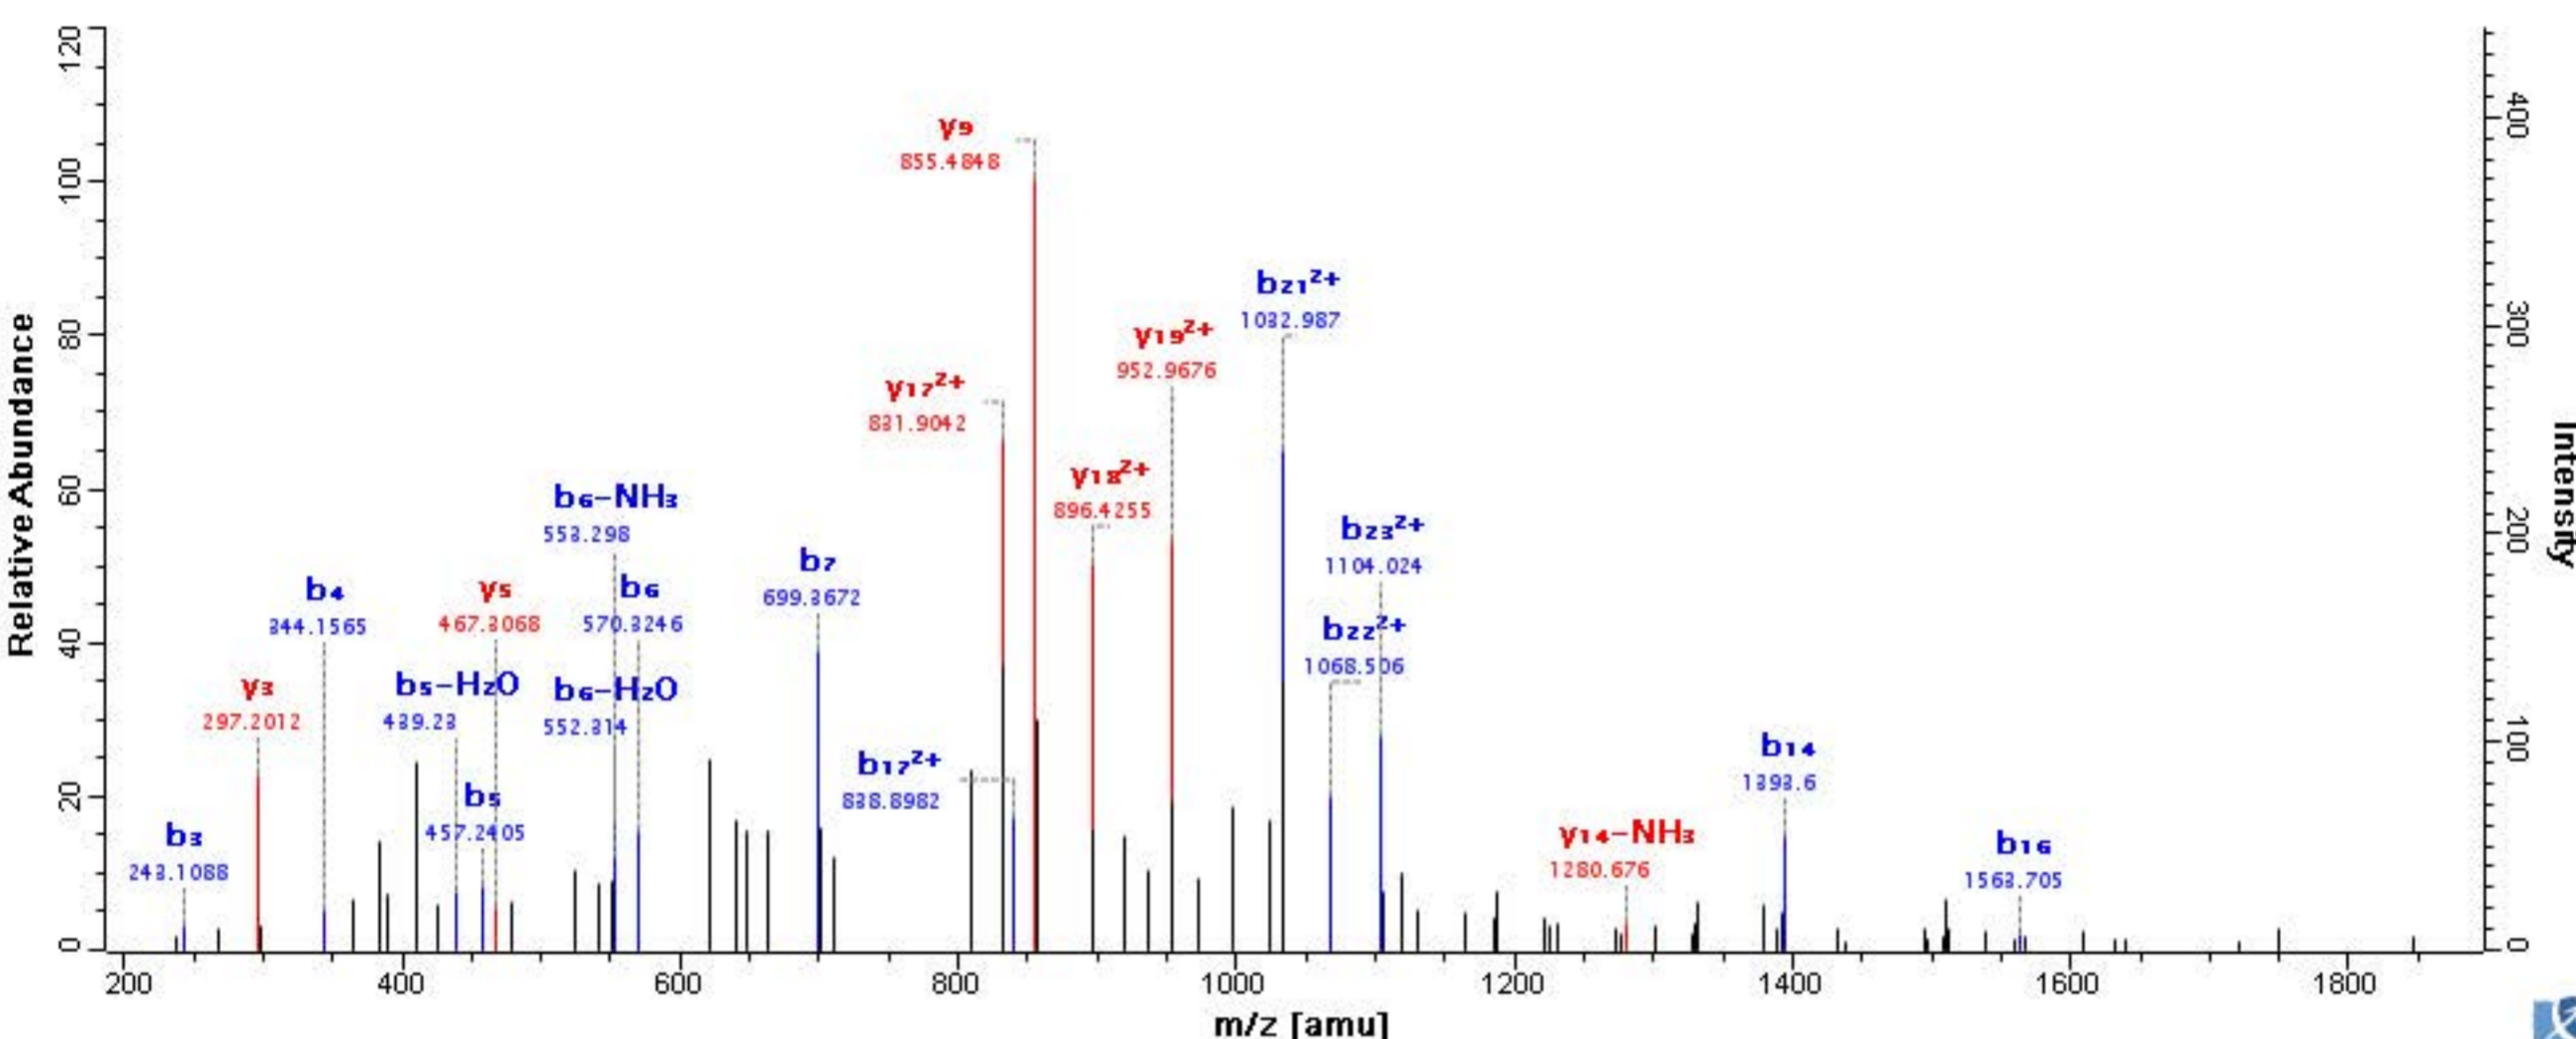

**precursor information**

|                   |                     |
|-------------------|---------------------|
| Mass:             | 2352.13884          |
| m/z:              | System.Collections. |
| Charge:           | System.Collections. |
| Retentiontime:    | System.Collections. |
| Score:            | 74.0475             |
| Mass Error [ppm]: | -0.33302            |
| PEP:              | 0.00012517          |
| Precursor Type:   | MULTI               |

| b <sup>2+</sup> ion |          | b ion     |          | seq |   |    | y ion    |           | y <sup>2+</sup> ion |           |
|---------------------|----------|-----------|----------|-----|---|----|----------|-----------|---------------------|-----------|
| Δ dalton            | mass     | Δ dalton  | mass     |     |   |    | Δ dalton | mass      | Δ dalton            | mass      |
|                     | 72.04439 |           | 72.04439 | 1   | A | 23 |          |           |                     |           |
|                     | 129.0659 |           | 129.0659 | 2   | G | 22 | 2290.124 |           | 2290.124            |           |
|                     | 243.1088 | +0.0605   | 243.1088 | 3   | N | 21 | 2233.103 |           | 2233.103            |           |
|                     | 344.1565 | +0.073643 | 344.1565 | 4   | T | 20 | 2119.06  |           | 2119.06             |           |
|                     | 457.2405 | +0.001725 | 457.2405 | 5   | I | 19 | 2018.012 |           | 2018.012            |           |
|                     | 570.3246 | -0.066348 | 570.3246 | 6   | I | 18 | 1904.928 |           | 952.9676            | -0.046667 |
|                     | 699.3672 | +0.048529 | 699.3672 | 7   | E | 17 | 1791.844 |           | 896.4255            | +0.179996 |
|                     | 796.4199 |           | 796.4199 | 8   | P | 16 | 1662.801 |           | 831.9042            | -0.044069 |
|                     | 977.434  |           | 977.434  | 9   | T | 15 | 1565.748 |           | 1565.748            |           |
|                     | 1064.466 |           | 1064.466 | 10  | S | 14 | 1384.734 |           | 1384.734            |           |
|                     | 1121.487 |           | 1121.487 | 11  | G | 13 | 1297.702 |           | 1297.702            |           |
|                     | 1235.53  |           | 1235.53  | 12  | N | 12 | 1240.681 |           | 1240.681            |           |
|                     | 1336.578 |           | 1336.578 | 13  | T | 11 | 1126.638 |           | 1126.638            |           |
|                     | 1393.6   | +0.102145 | 1393.6   | 14  | G | 10 | 1025.59  |           | 1025.59             |           |
|                     | 1506.684 |           | 1506.684 | 15  | I | 9  | 968.5689 |           | 968.5689            |           |
|                     | 1563.705 | -0.043788 | 1563.705 | 16  | G | 8  | 855.4848 | +0.125125 | 855.4848            |           |
| +0.282045           | 838.8982 |           | 1676.789 | 17  | I | 7  | 798.4633 |           | 798.4633            |           |
|                     | 1747.826 |           | 1747.826 | 18  | A | 6  | 685.3793 |           | 685.3793            |           |
|                     | 1894.862 |           | 1894.862 | 19  | M | 5  | 614.3422 |           | 614.3422            |           |
|                     | 1993.93  |           | 1993.93  | 20  | V | 4  | 467.3068 | +0.060673 | 467.3068            |           |
| +0.366426           | 1032.987 |           | 2064.967 | 21  | A | 3  | 368.2383 |           | 368.2383            |           |
| -0.013826           | 1068.506 |           | 2136.004 | 22  | A | 2  | 297.2012 | +0.021395 | 297.2012            |           |
| +0.402676           | 1104.024 |           | 2207.041 | 23  | A | 1  | 226.1641 |           | 226.1641            |           |
|                     |          |           |          | 24  | K | 0  | 155.127  |           | 155.127             |           |

**general information**

|                       |           |
|-----------------------|-----------|
| Annotation:           | 14 of 24  |
| AminoAcids Coverag    | 58 %      |
| Intensity Coverage:   | 49 %      |
| Protein Localisation: | 64 ... 87 |

Source: 20120602\_VR\_Bsu\_TripleSILAC\_pWTPPrkCPrpC\_F23  
 Scannumber: 10277  
 Protein: BSU33940; gap; gapA  
 Peptide Score: 72.43  
 Method: ITMS; CID; 3

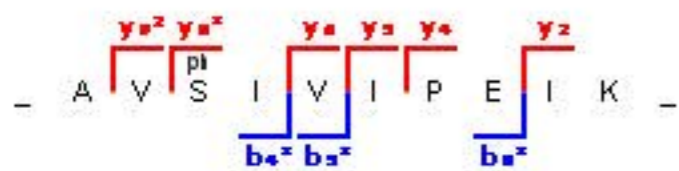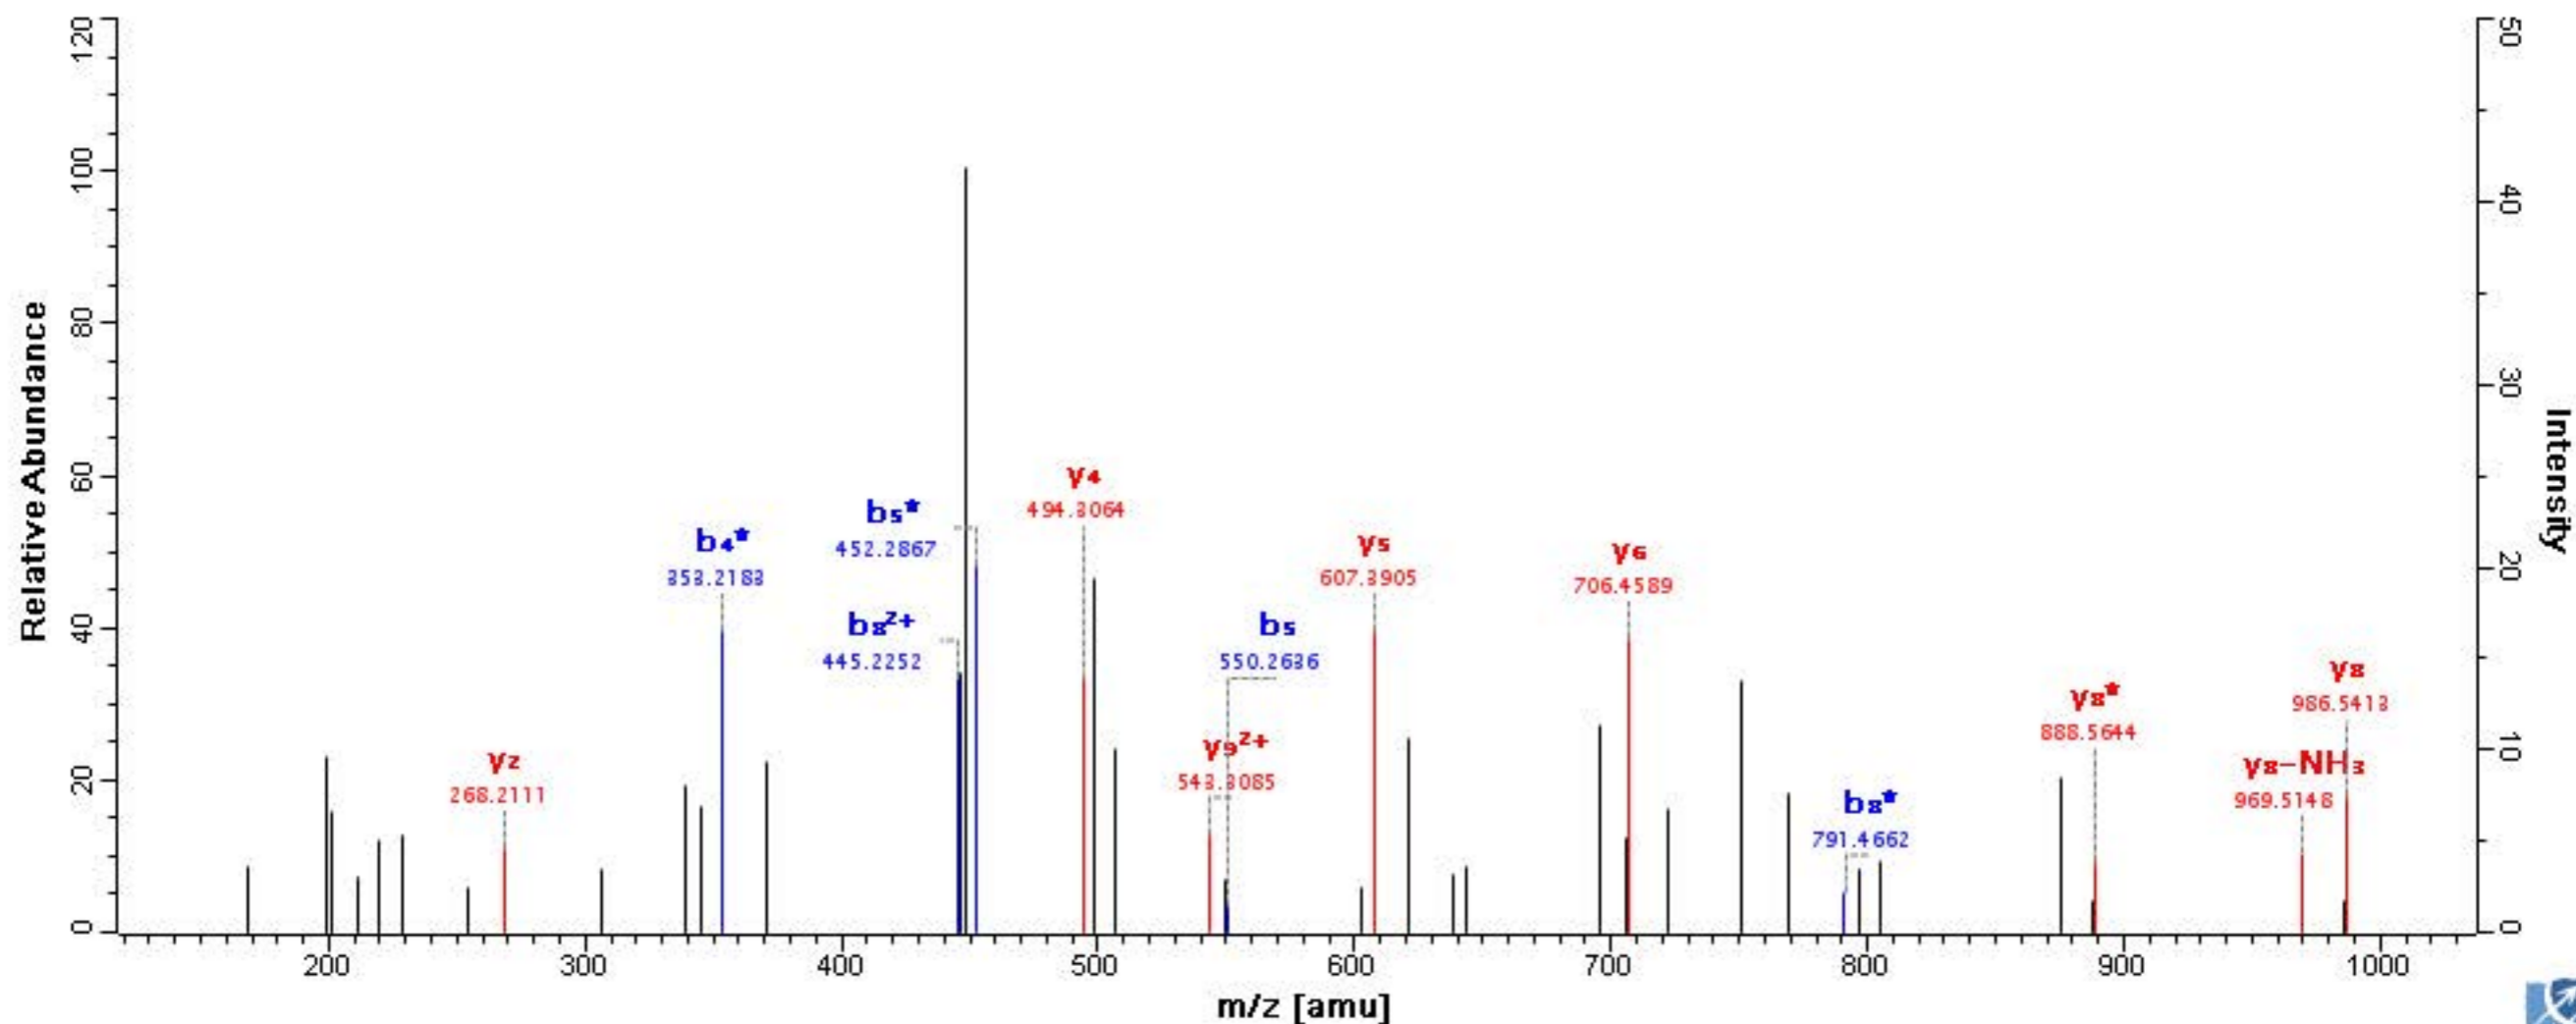

#### precursor information

|                   |                     |
|-------------------|---------------------|
| Mass:             | 1147.62511          |
| m/z:              | System.Collections. |
| Charge:           | System.Collections. |
| Retentiontime:    | System.Collections. |
| Score:            | 72.43395            |
| Mass Error [ppm]: | -0.22882            |
| PEP:              | 0.012379            |
| Precursor Type:   | MULTI               |

#### general information

|                       |             |
|-----------------------|-------------|
| Annotation:           | 8 of 10     |
| AminoAcids Coverage:  | 80 %        |
| Intensity Coverage:   | 35 %        |
| Protein Localisation: | 215 ... 224 |

| b <sup>2+</sup> ion |          | b ion     |          |     | γ ion |          | γ <sup>2+</sup> ion |          |           |
|---------------------|----------|-----------|----------|-----|-------|----------|---------------------|----------|-----------|
| Δ dalton            | mass     | Δ dalton  | mass     | seq |       | Δ dalton | mass                | Δ dalton | mass      |
|                     | 72.04439 |           | 72.04439 | 1   | A     |          |                     |          |           |
|                     | 171.1128 |           | 171.1128 | 2   | V     | 1085.61  |                     | 543.3085 | -0.006994 |
|                     | 338.1112 |           | 338.1112 | 3   | S     | 986.5413 | +0.410336           | 986.5413 |           |
|                     | 451.1952 |           | 451.1952 | 4   | I     | 819.543  |                     | 819.543  |           |
|                     | 550.2636 | +0.026215 | 550.2636 | 5   | V     | 706.4589 | +0.170127           | 706.4589 |           |
|                     | 663.3477 |           | 663.3477 | 6   | I     | 607.3905 | +0.164627           | 607.3905 |           |
|                     | 760.4005 |           | 760.4005 | 7   | P     | 494.3064 | +0.057651           | 494.3064 |           |
| -0.252513           | 445.2252 |           | 889.4431 | 8   | E     | 397.2537 |                     | 397.2537 |           |
|                     | 1002.527 |           | 1002.527 | 9   | I     | 268.2111 | +0.022728           | 268.2111 |           |
|                     |          |           |          | 10  | K     | 155.127  |                     | 155.127  |           |



Source: 20120602\_VR\_Bsu\_TripleSILAC\_pWTPPrkCPrpC\_F23  
 Scannumber: 10606  
 Protein: BSU13140; ohrA; ykIA  
 Peptide Score: 119.32  
 Method: ITMS; CID; 3

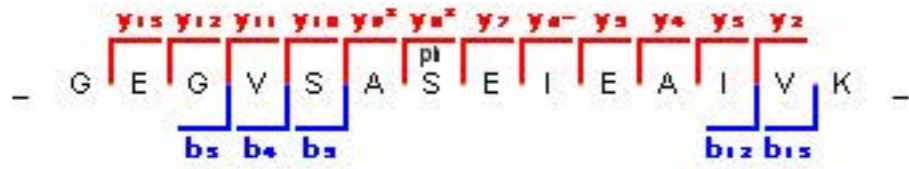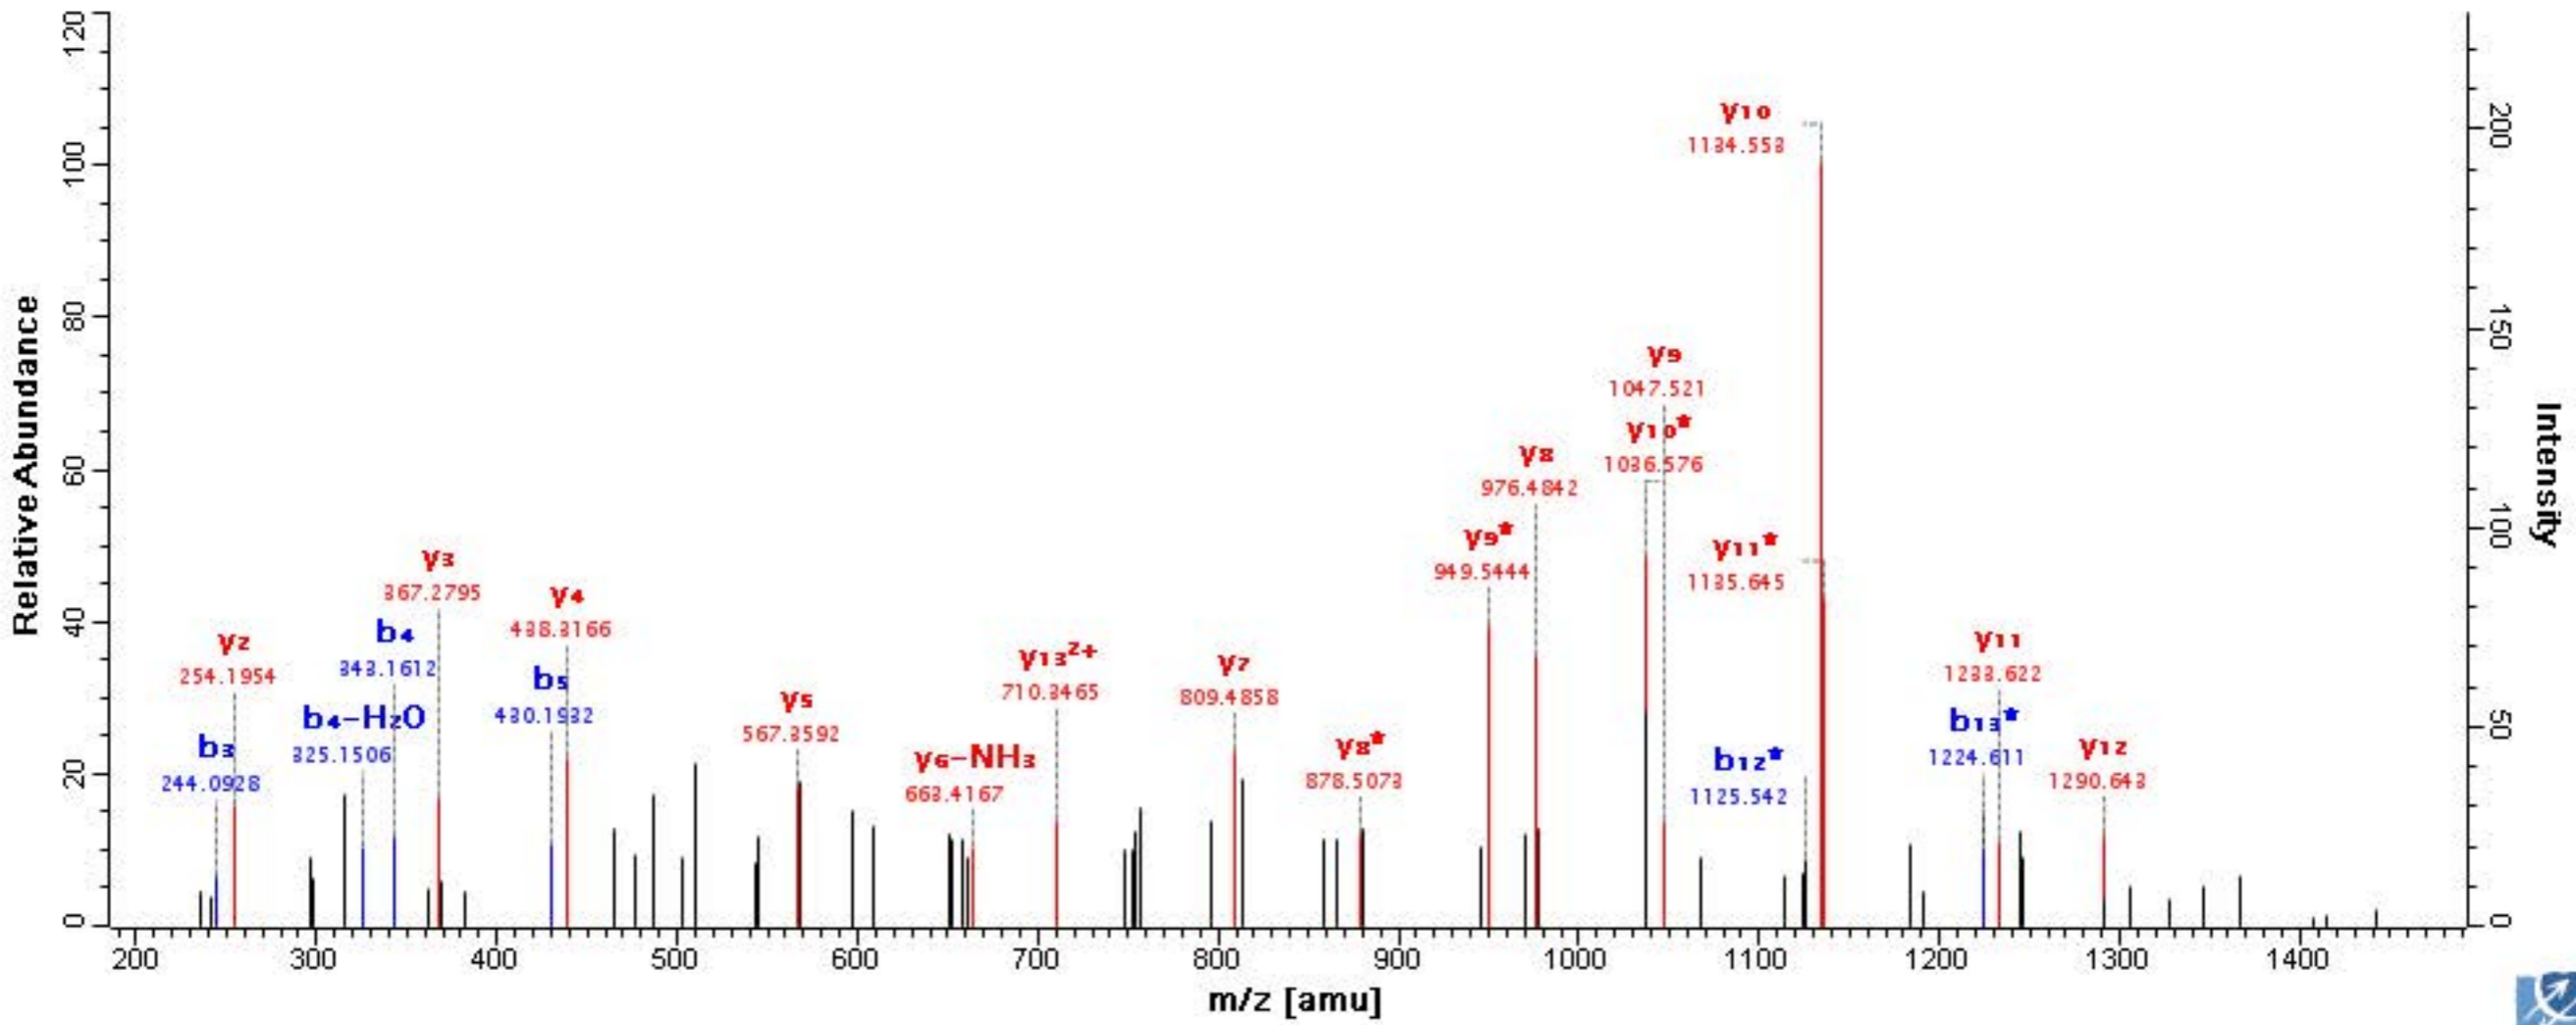

#### precursor information

|                   |                     |
|-------------------|---------------------|
| Mass:             | 1467.686            |
| m/z:              | System.Collections. |
| Charge:           | System.Collections. |
| Retentiontime:    | System.Collections. |
| Score:            | 119.3155            |
| Mass Error [ppm]: | 0.12909             |
| PEP:              | 3.013E-10           |
| Precursor Type:   | MULTI               |

#### general information

|                       |             |
|-----------------------|-------------|
| Annotation:           | 12 of 14    |
| AminoAcids Coverage:  | 86 %        |
| Intensity Coverage:   | 47 %        |
| Protein Localisation: | 104 ... 117 |

| b ion           |              |    |     |    | $\gamma$ ion    |            |                 | $\gamma^{2+}$ ion |  |
|-----------------|--------------|----|-----|----|-----------------|------------|-----------------|-------------------|--|
| $\Delta$ dalton | mass         |    | seq |    | $\Delta$ dalton | mass       | $\Delta$ dalton | mass              |  |
|                 | 58.02874019  | 1  | G   | 13 |                 |            |                 |                   |  |
|                 | 187.07133329 | 2  | E   | 12 | 1419.6858166    |            | 710.34654653    | +0.4435536        |  |
| +0.2120889      | 244.09279701 | 3  | G   | 11 | 1290.6432235    | -0.1521346 | 1290.6432235    |                   |  |
| -0.3954639      | 343.16121093 | 4  | V   | 10 | 1233.6217598    | -0.2815498 | 1233.6217598    |                   |  |
| +0.1052226      | 430.19323934 | 5  | S   | 9  | 1134.5533459    | -0.1083996 | 1134.5533459    |                   |  |
|                 | 501.23035312 | 6  | A   | 8  | 1047.5213174    | -0.0498819 | 1047.5213174    |                   |  |
|                 | 668.22871194 | 7  | S   | 7  | 976.48420366    | -0.0015987 | 976.48420366    |                   |  |
|                 | 797.27130504 | 8  | E   | 6  | 809.48584484    | +0.0479076 | 809.48584484    |                   |  |
|                 | 910.35536902 | 9  | I   | 5  | 680.44325174    |            | 680.44325174    |                   |  |
|                 | 1039.3979621 | 10 | E   | 4  | 567.35918776    | +0.0059245 | 567.35918776    |                   |  |
|                 | 1110.4350759 | 11 | A   | 3  | 438.31659467    | +0.0337471 | 438.31659467    |                   |  |
|                 | 1223.5191399 | 12 | I   | 2  | 367.27948088    | +0.0632315 | 367.27948088    |                   |  |
|                 | 1322.5875538 | 13 | V   | 1  | 254.1954169     | -0.040998  | 254.1954169     |                   |  |
|                 |              | 14 | K   | 0  | 155.12700298    |            | 155.12700298    |                   |  |

Source: 201 20602\_VR\_Bsu\_TripleSILAC\_pWTPPrkCPrpC\_F23  
 Scannumber: 10788  
 Protein: BSU16600; nusA  
 Peptide Score: 62.38  
 Method: ITMS; CID; 3

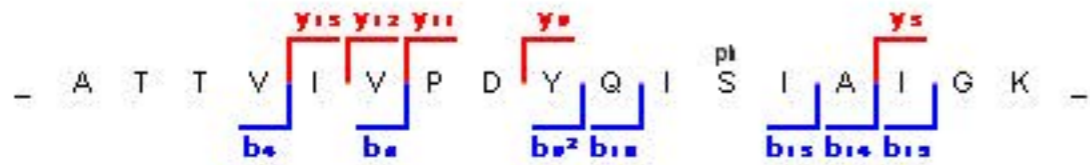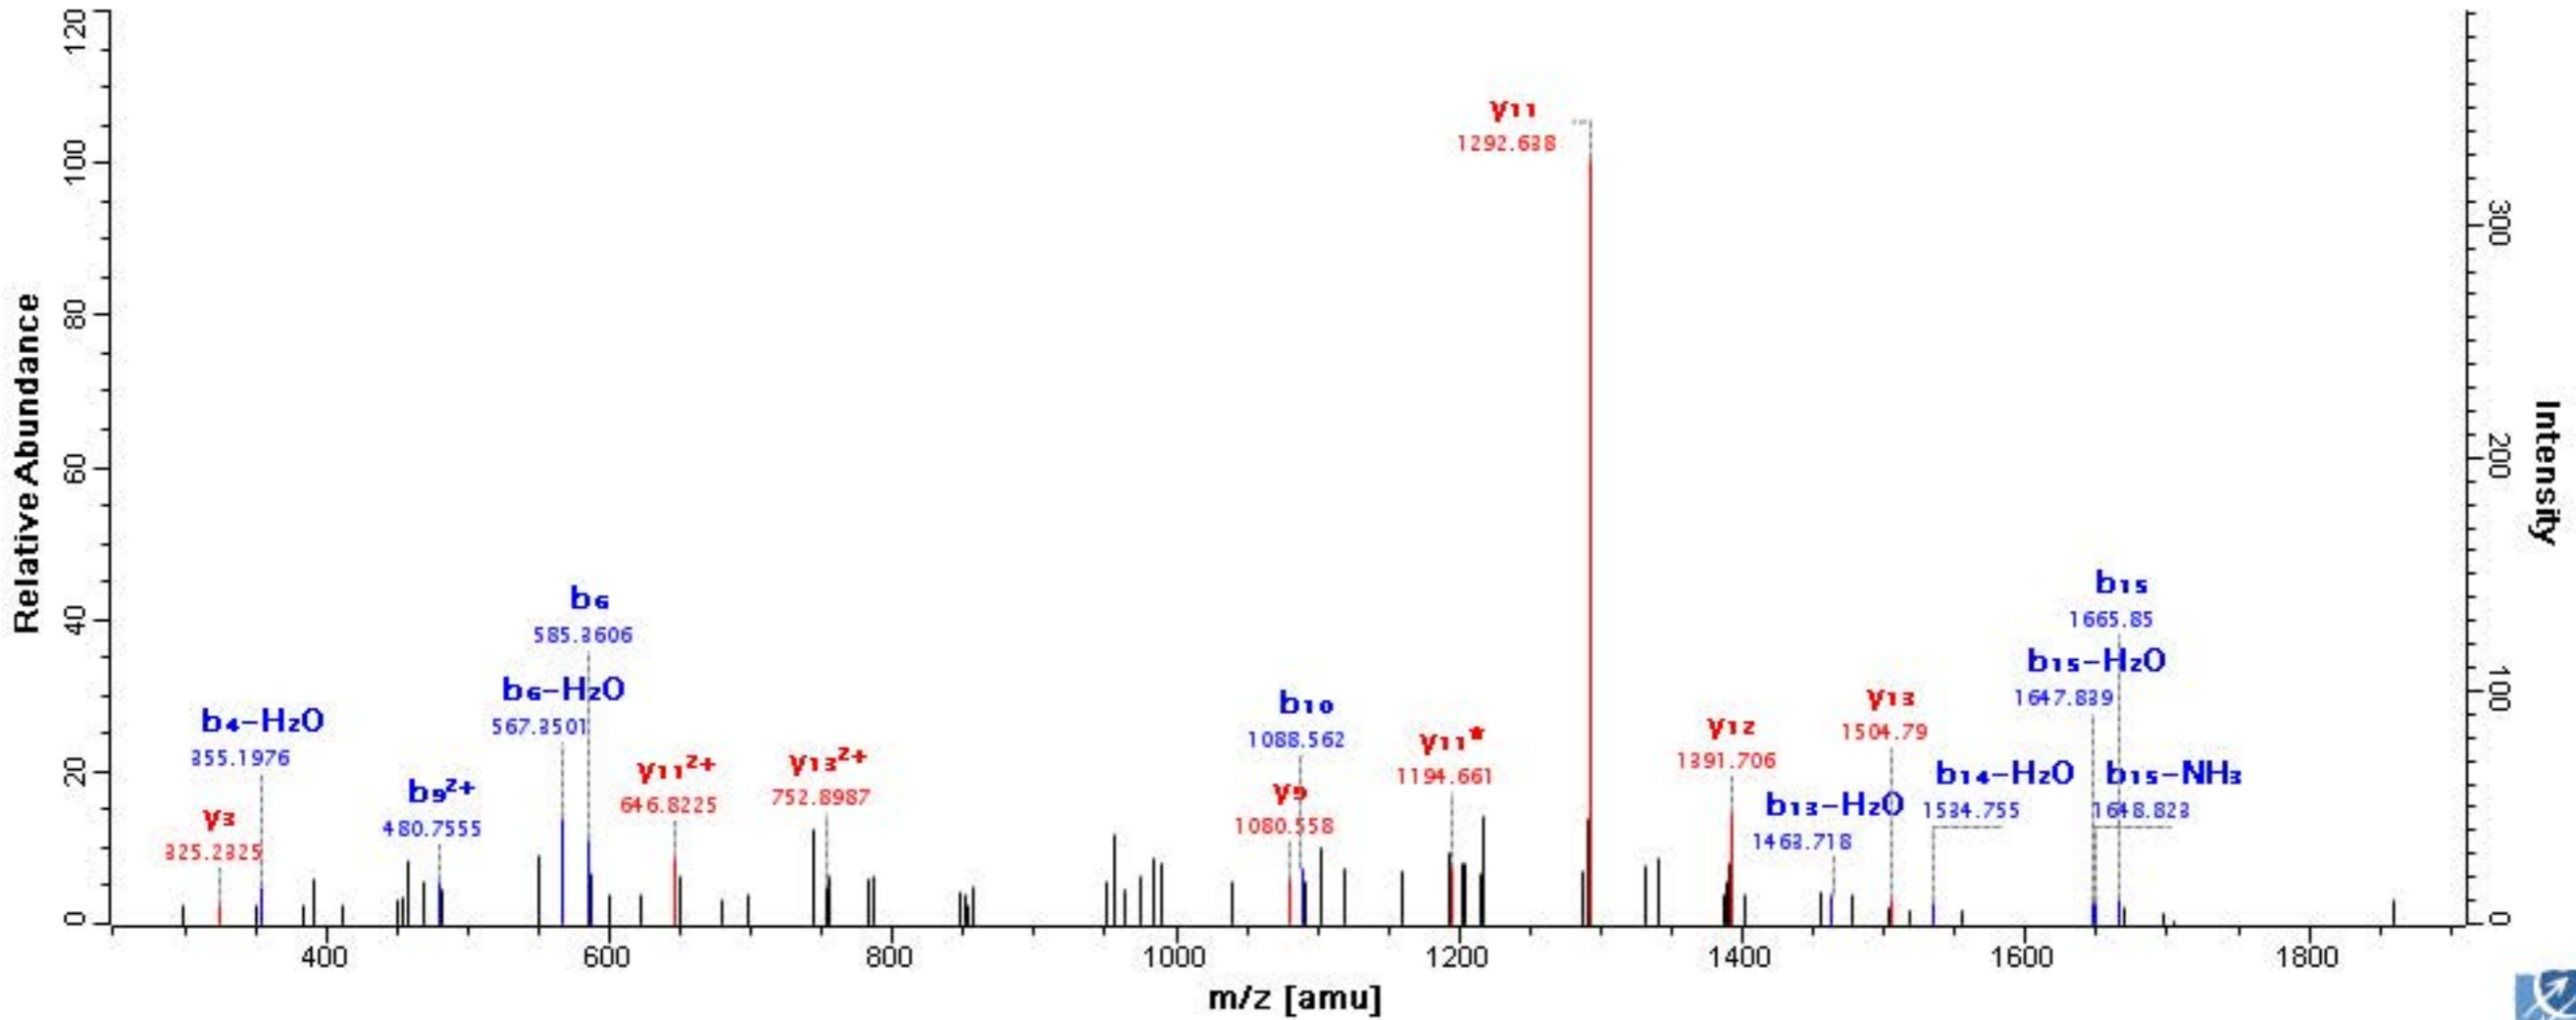

#### precursor information

|                   |                     |
|-------------------|---------------------|
| Mass:             | 1867.96985          |
| m/z:              | System.Collections. |
| Charge:           | System.Collections. |
| Retentiontime:    | System.Collections. |
| Score:            | 62.37828            |
| Mass Error [ppm]: | 0.11591             |
| PEP:              | 0.007918            |
| Precursor Type:   | MULTI               |

| b <sup>2+</sup> ion |          | b ion     |          | seq |   |    | y ion    |           | y <sup>2+</sup> ion |           |
|---------------------|----------|-----------|----------|-----|---|----|----------|-----------|---------------------|-----------|
| Δ dalton            | mass     | Δ dalton  | mass     |     |   |    | Δ dalton | mass      | Δ dalton            | mass      |
|                     | 72.04439 |           | 72.04439 | 1   | A | 16 |          |           |                     |           |
|                     | 173.0921 |           | 173.0921 | 2   | T | 15 | 1805.954 |           | 1805.954            |           |
|                     | 274.1397 |           | 274.1397 | 3   | T | 14 | 1704.906 |           | 1704.906            |           |
|                     | 373.2082 |           | 373.2082 | 4   | V | 13 | 1603.859 |           | 1603.859            |           |
|                     | 486.2922 |           | 486.2922 | 5   | I | 12 | 1504.79  | +0.282776 | 752.8987            | -0.018195 |
|                     | 585.3606 | -0.10777  | 585.3606 | 6   | V | 11 | 1391.706 | +0.191913 | 1391.706            |           |
|                     | 682.4134 |           | 682.4134 | 7   | P | 10 | 1292.638 | +0.013257 | 646.8225            | -0.394288 |
|                     | 797.4403 |           | 797.4403 | 8   | D | 9  | 1195.585 |           | 1195.585            |           |
| -0.02934            | 480.7555 |           | 960.5037 | 9   | Y | 8  | 1080.558 | -0.200005 | 1080.558            |           |
|                     | 1088.562 | +0.295536 | 1088.562 | 10  | Q | 7  | 917.4947 |           | 917.4947            |           |
|                     | 1201.646 |           | 1201.646 | 11  | I | 6  | 789.4361 |           | 789.4361            |           |
|                     | 1368.645 |           | 1368.645 | 12  | S | 5  | 676.3521 |           | 676.3521            |           |
|                     | 1481.729 |           | 1481.729 | 13  | I | 4  | 509.3537 |           | 509.3537            |           |
|                     | 1552.766 |           | 1552.766 | 14  | A | 3  | 396.2696 |           | 396.2696            |           |
|                     | 1665.85  | +0.194761 | 1665.85  | 15  | I | 2  | 325.2325 | -0.080034 | 325.2325            |           |
|                     | 1722.871 |           | 1722.871 | 16  | G | 1  | 212.1485 |           | 212.1485            |           |
|                     |          |           |          | 17  | K | 0  | 155.127  |           | 155.127             |           |

#### general information

|                       |             |
|-----------------------|-------------|
| Annotation:           | 9 of 17     |
| AminoAcids Coverag    | 53 %        |
| Intensity Coverage:   | 36 %        |
| Protein Localisation: | 303 ... 319 |

Source: 20120602\_VR\_Bsu\_TripleSILAC\_pWTPPrkCPrpC\_F23  
 Scannumber: 11885  
 Protein: BSU29130; citC; icd  
 Peptide Score: 168.61  
 Method: ITMS; CID; 3

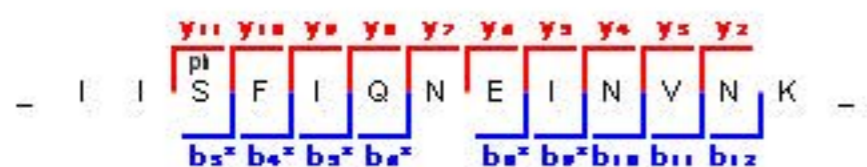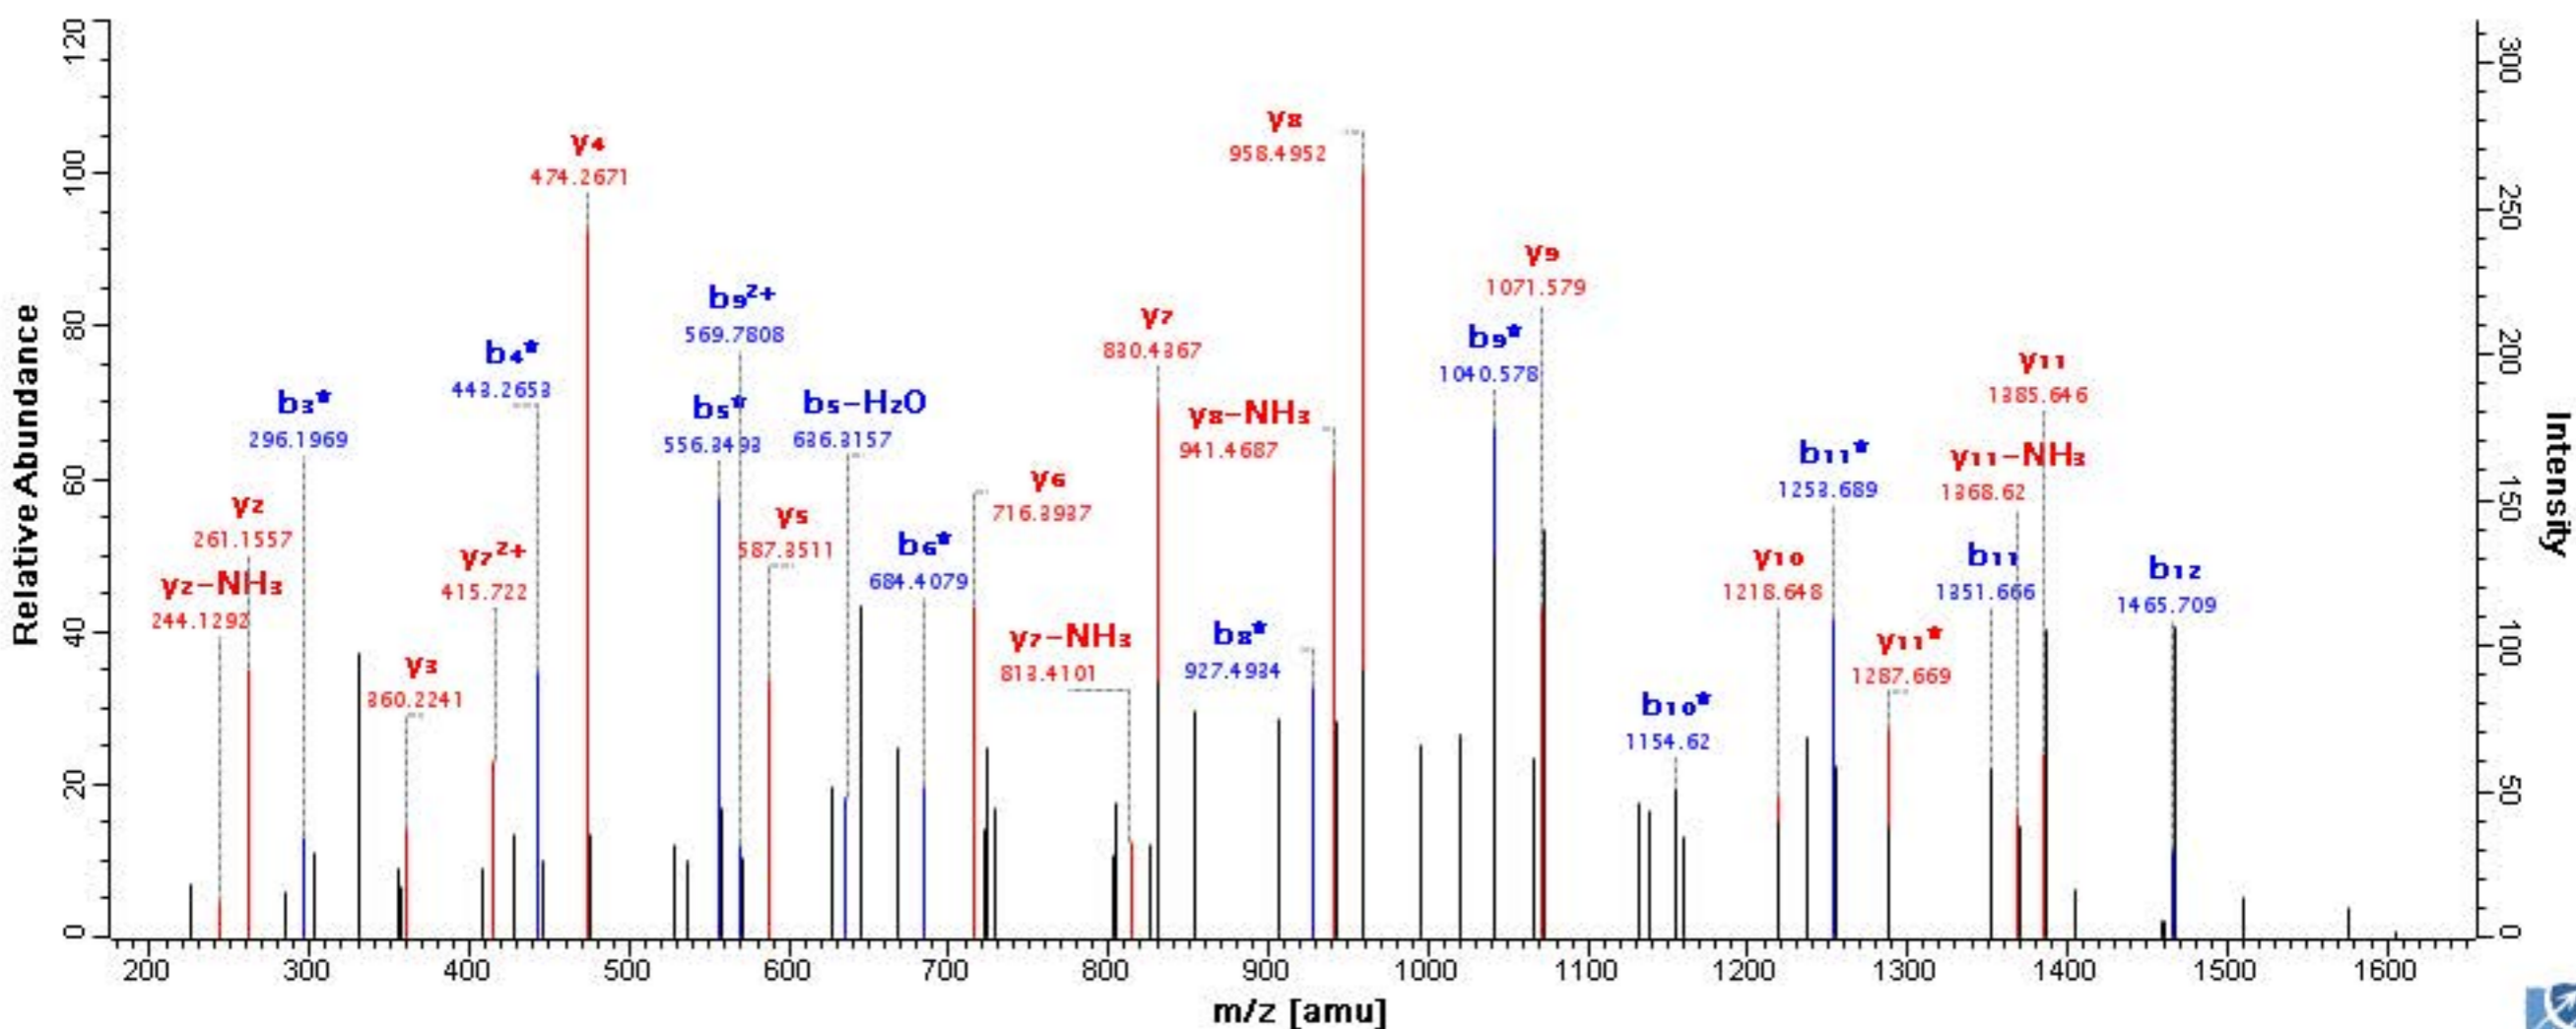

**precursor information**

|                   |                     |
|-------------------|---------------------|
| Mass:             | 1610.80697          |
| m/z:              | System.Collections. |
| Charge:           | System.Collections. |
| Retentiontime:    | System.Collections. |
| Score:            | 168.6075            |
| Mass Error [ppm]: | 0.027936            |
| PEP:              | 7.0909E-27          |
| Precursor Type:   | MULTI               |

**general information**

|                       |             |
|-----------------------|-------------|
| Annotation:           | 10 of 13    |
| AminoAcids Coverag    | 77 %        |
| Intensity Coverage:   | 49 %        |
| Protein Localisation: | 166 ... 178 |

| b <sup>2+</sup> ion |          | b ion     |          |     | γ ion |          | γ <sup>2+</sup> ion |           |          |           |
|---------------------|----------|-----------|----------|-----|-------|----------|---------------------|-----------|----------|-----------|
| Δ dalton            | mass     | Δ dalton  | mass     | seq |       | Δ dalton | mass                | Δ dalton  | mass     |           |
|                     | 114.0913 |           | 114.0913 | 1   | I     | 12       |                     |           |          |           |
|                     | 227.1754 |           | 227.1754 | 2   | I     | 11       | 1498.73             |           | 1498.73  |           |
|                     | 394.1738 |           | 394.1738 | 3   | S     | 10       | 1385.646            | -0.005569 | 1385.646 |           |
|                     | 541.2422 |           | 541.2422 | 4   | F     | 9        | 1218.648            | -0.038948 | 1218.648 |           |
|                     | 654.3262 |           | 654.3262 | 5   | I     | 8        | 1071.579            | +0.051194 | 1071.579 |           |
|                     | 782.3848 |           | 782.3848 | 6   | Q     | 7        | 958.4952            | +0.010441 | 958.4952 |           |
|                     | 896.4277 |           | 896.4277 | 7   | N     | 6        | 830.4367            | -0.011365 | 415.722  | -0.257489 |
|                     | 1025.47  |           | 1025.47  | 8   | E     | 5        | 716.3937            | -0.025383 | 716.3937 |           |
| -0.246172           | 569.7808 |           | 1138.554 | 9   | I     | 4        | 587.3511            | -0.009767 | 587.3511 |           |
|                     | 1252.597 |           | 1252.597 | 10  | N     | 3        | 474.2671            | -0.001631 | 474.2671 |           |
|                     | 1351.666 | -0.024997 | 1351.666 | 11  | V     | 2        | 360.2241            | +0.081885 | 360.2241 |           |
|                     | 1465.709 | +0.063911 | 1465.709 | 12  | N     | 1        | 261.1557            | -0.016114 | 261.1557 |           |
|                     |          |           |          | 13  | K     | 0        | 147.1128            |           | 147.1128 |           |

Source: 20120602\_VR\_Bsu\_TripleSILAC\_pWTPrkCPrpC\_F23  
 Scannumber: 4081  
 Protein: BSU23890; oxaA2  
 Peptide Score: 62.3  
 Method: ITMS; CID; 3

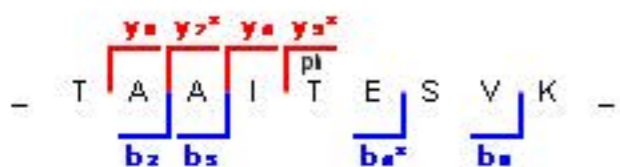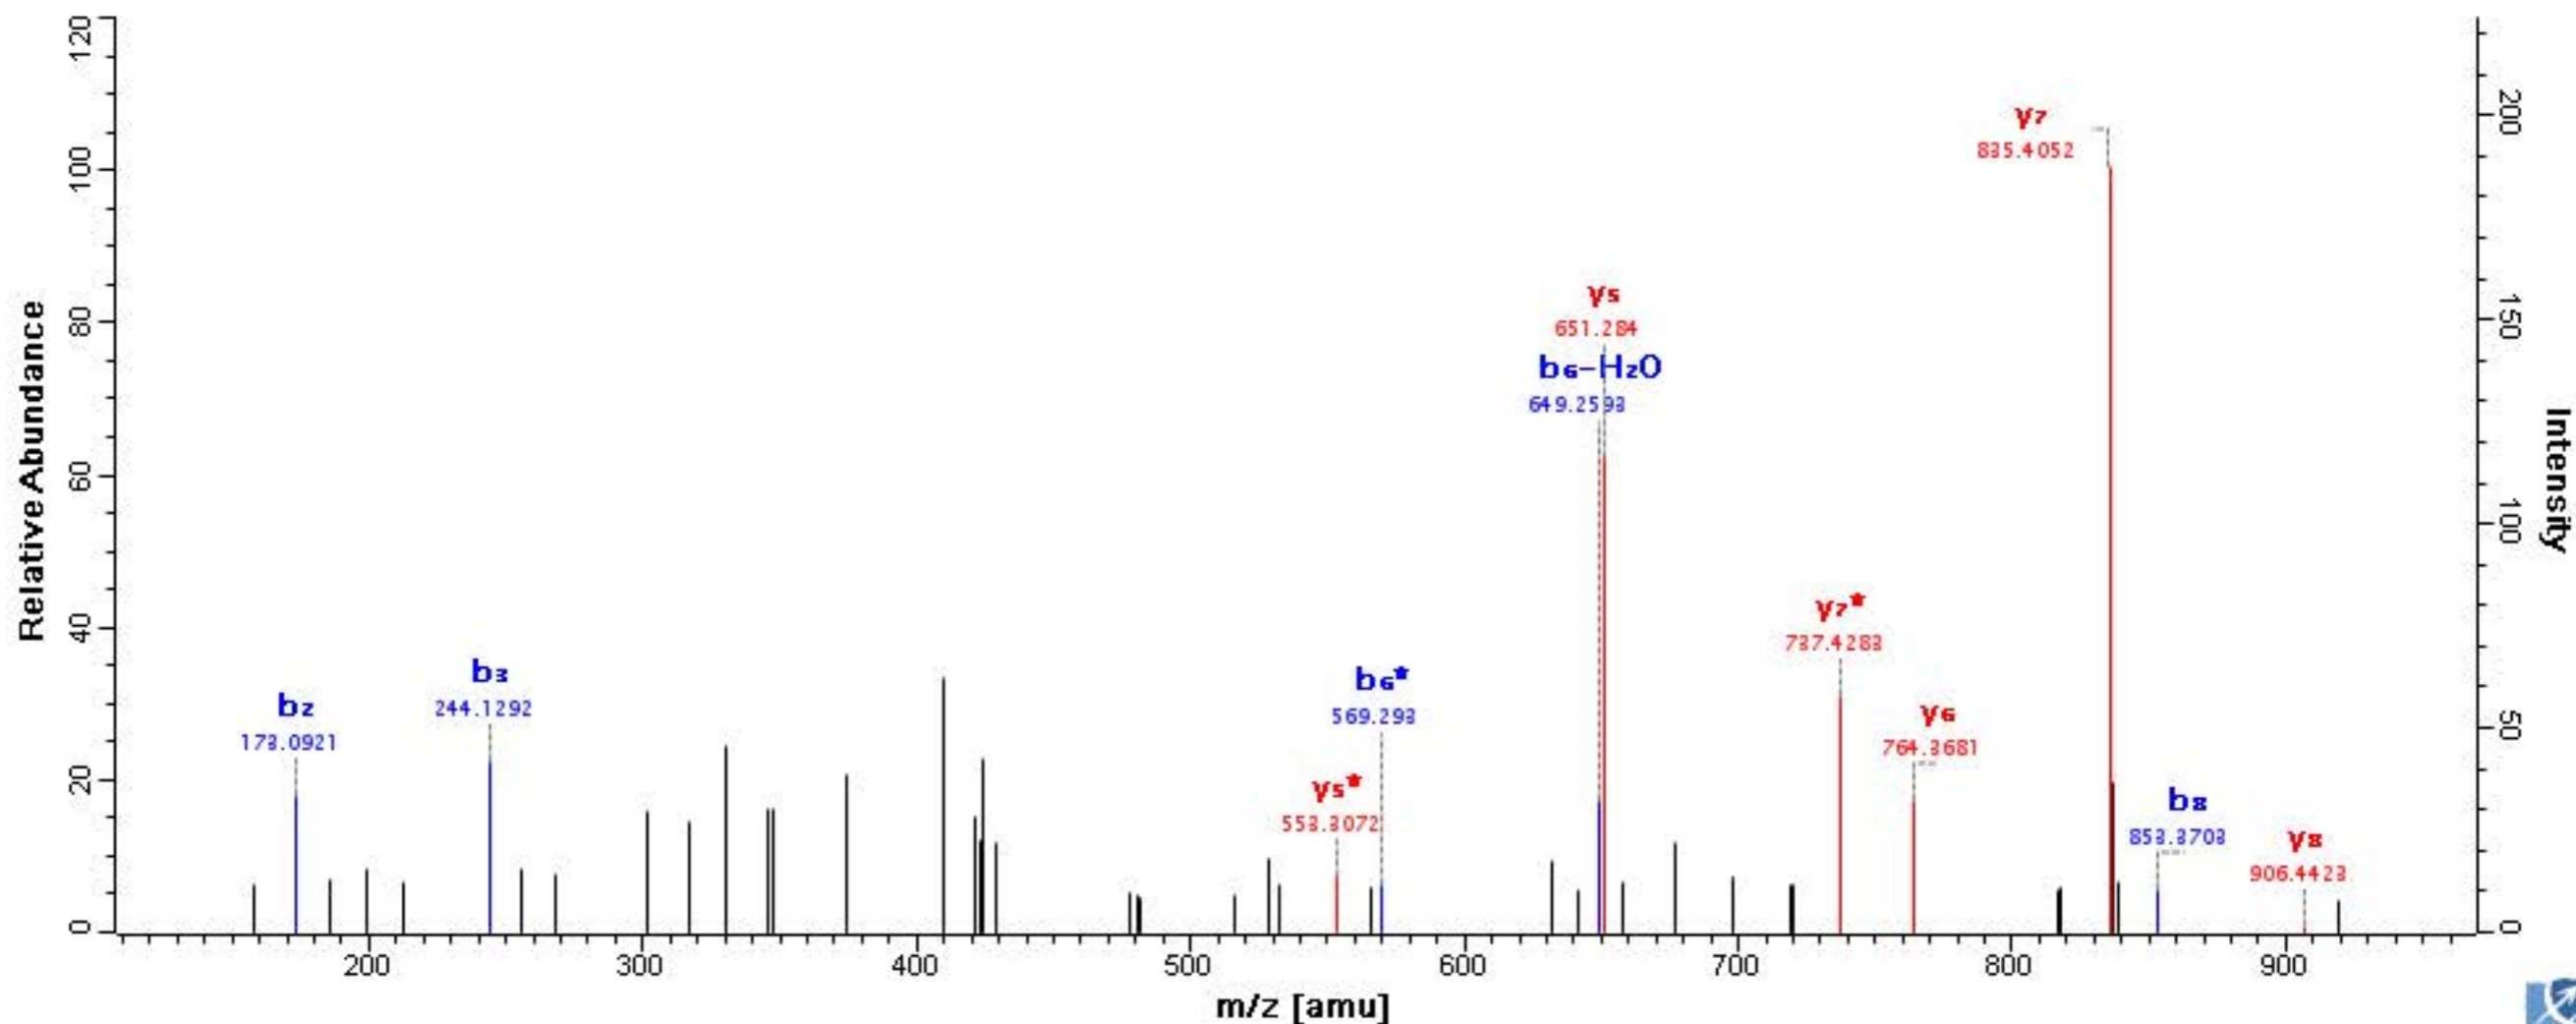

#### precursor information

|                          |                     |
|--------------------------|---------------------|
| Mass:                    | 998.46858           |
| m/z:                     | System.Collections. |
| Charge:                  | System.Collections. |
| Retentiontime:           | System.Collections. |
| Score:                   | 62.30259            |
| Mass Error [ppm]:        | 0.040724            |
| PEP:                     | 0.12106             |
| <b>g</b> Precursor Type: | MULTI               |
| Annotation:              | 6 of 9              |
| AminoAcids Coverag       | 67 %                |
| Intensity Coverage:      | 43 %                |
| Protein Localisation:    | 267 ... 275         |

| b ion           |               |     |   | y ion           |               |  |            |
|-----------------|---------------|-----|---|-----------------|---------------|--|------------|
| $\Delta$ dalton | mass          | seq |   | $\Delta$ dalton | mass          |  |            |
|                 | 102.054954941 | 1   | T | 8               |               |  |            |
| +0.0192899      | 173.092068728 | 2   | A | 7               | 906.442338845 |  | +0.1695386 |
| +0.0485213      | 244.129182516 | 3   | A | 6               | 835.405225057 |  | +0.0941036 |
|                 | 357.213246497 | 4   | I | 5               | 764.368111269 |  | +0.0742105 |
|                 | 538.227255379 | 5   | T | 4               | 651.284047289 |  | +0.0735577 |
|                 | 667.269848475 | 6   | E | 3               | 470.270038406 |  |            |
|                 | 754.301876885 | 7   | S | 2               | 341.22744531  |  |            |
| -0.0349026      | 853.370290802 | 8   | V | 1               | 254.1954169   |  |            |
|                 |               | 9   | K | 0               | 155.127002984 |  |            |

Source: 20120602\_VR\_Bsu\_TripleSILAC\_pWTPPrkCPrpC\_F23  
 Scannumber: 7587  
 Protein: BSU16290; flgE; flgG  
 Peptide Score: 55.72  
 Method: ITMS; CID; 3

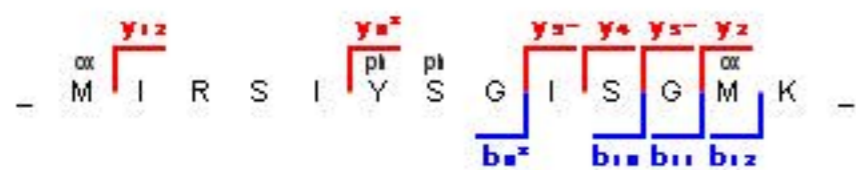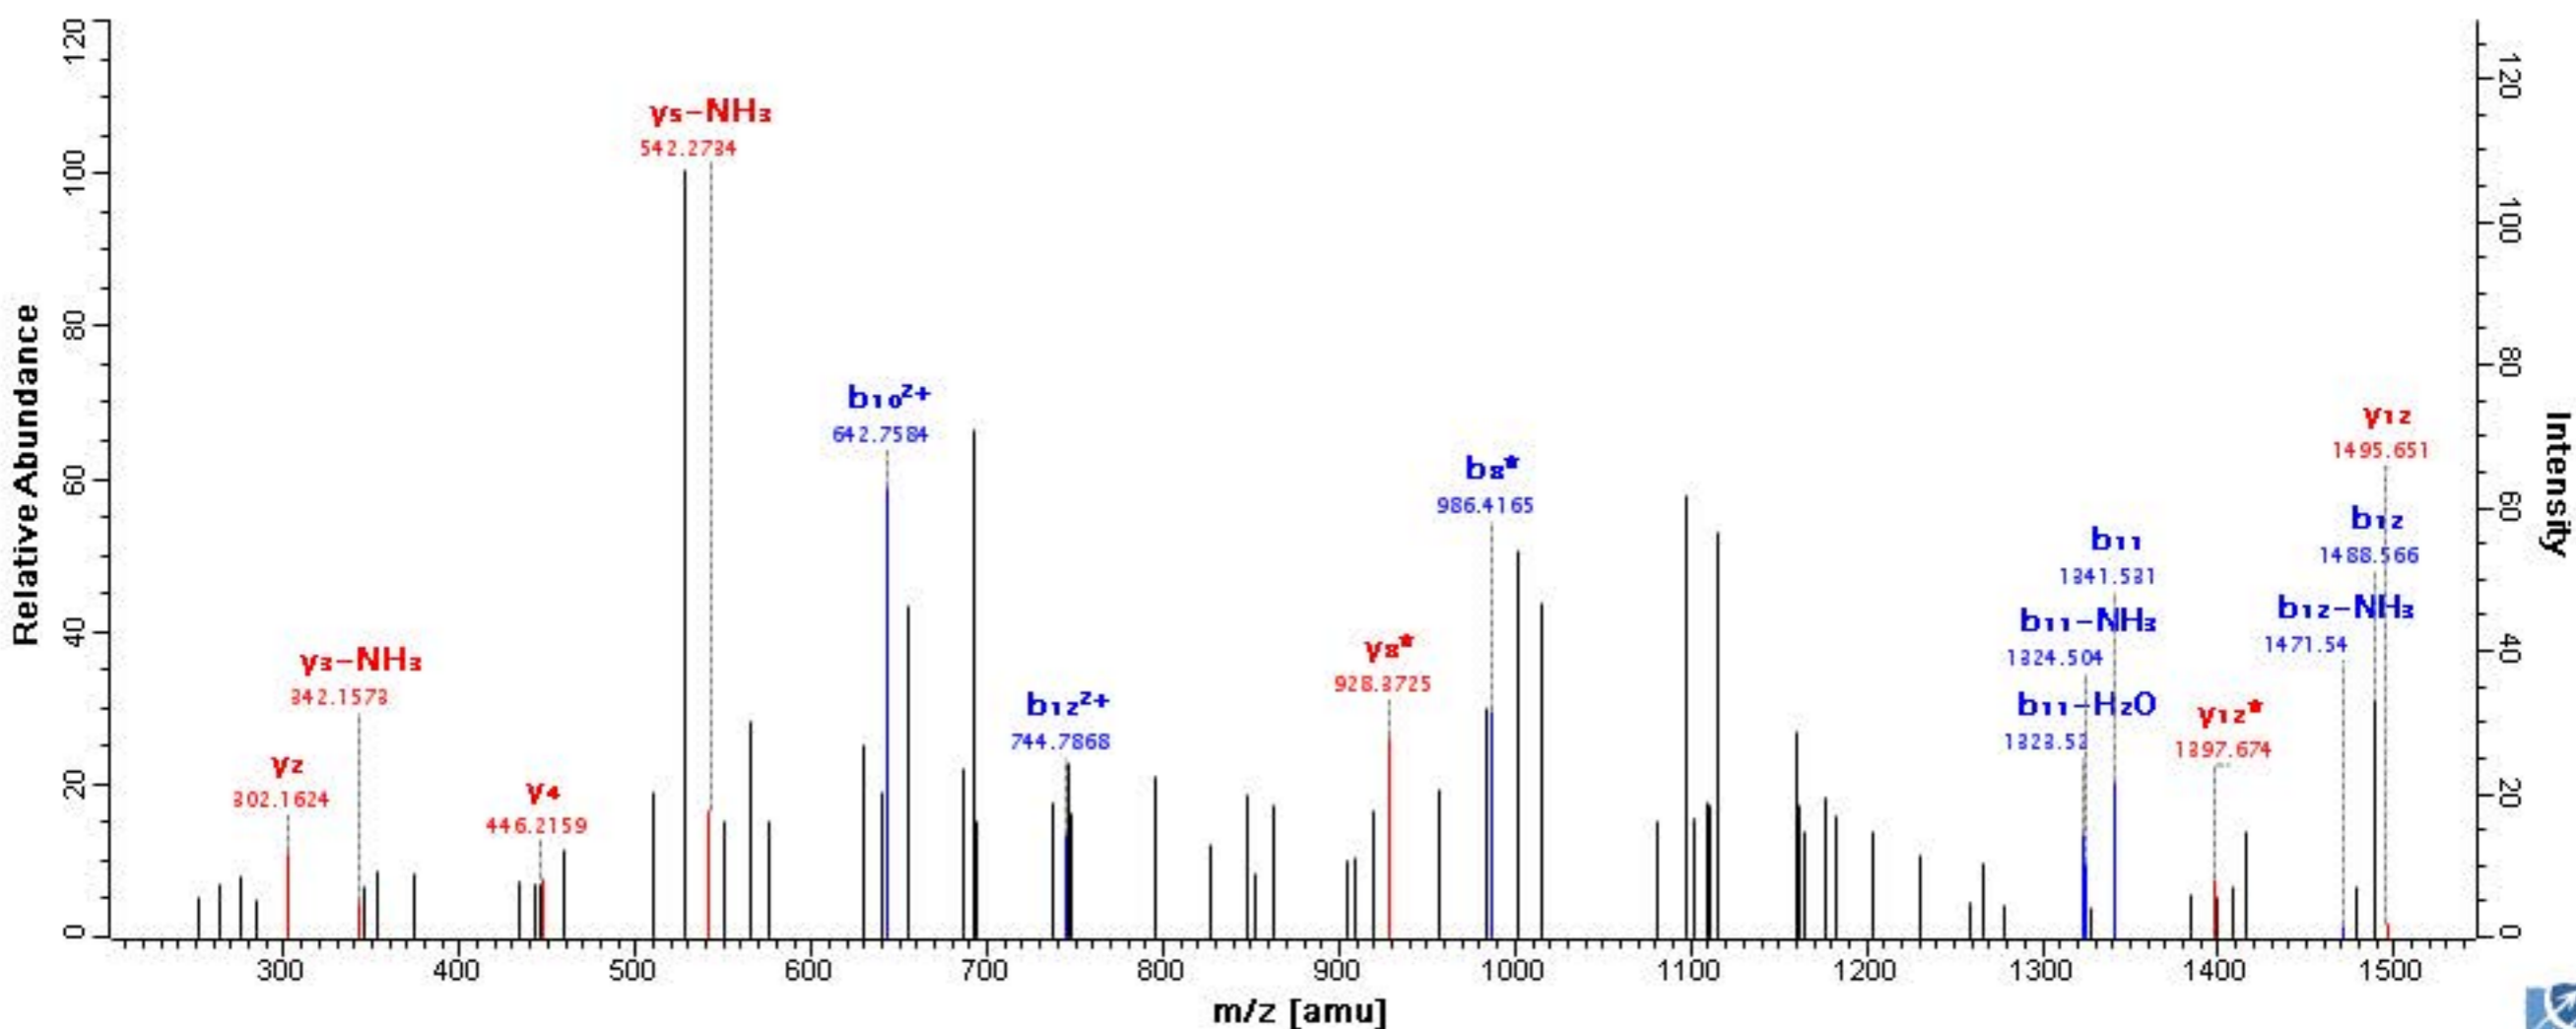

#### precursor information

|                   |                     |
|-------------------|---------------------|
| Mass:             | 1633.66504          |
| m/z:              | System.Collections. |
| Charge:           | System.Collections. |
| Retentiontime:    | System.Collections. |
| Score:            | 55.72391            |
| Mass Error [ppm]: | 0.24692             |
| PEP:              | 0.10591             |
| Precursor Type:   | MULTI               |

#### general information

|                       |          |
|-----------------------|----------|
| Annotation:           | 7 of 13  |
| AminoAcids Coverag    | 54%      |
| Intensity Coverage:   | 17%      |
| Protein Localisation: | 1 ... 13 |

| b <sup>2+</sup> ion |              | b ion           |              |     | y ion           |      |                         |
|---------------------|--------------|-----------------|--------------|-----|-----------------|------|-------------------------|
| $\Delta$ dalton     | mass         | $\Delta$ dalton | mass         | seq | $\Delta$ dalton | mass |                         |
|                     | 148.04267569 |                 | 148.04267569 | 1   | M               | 12   |                         |
|                     | 261.12673968 |                 | 261.12673968 | 2   | I               | 11   | 1495.6507072 +0.1377449 |
|                     | 417.2278507  |                 | 417.2278507  | 3   | R               | 10   | 1382.5666432            |
|                     | 504.25987911 |                 | 504.25987911 | 4   | S               | 9    | 1226.4655322            |
|                     | 617.34394309 |                 | 617.34394309 | 5   | I               | 8    | 1139.4335038            |
|                     | 860.37360204 |                 | 860.37360204 | 6   | Y               | 7    | 1026.3494398            |
|                     | 1027.3719609 |                 | 1027.3719609 | 7   | S               | 6    | 783.31978087            |
|                     | 1084.3934246 |                 | 1084.3934246 | 8   | G               | 5    | 616.32142205            |
|                     | 1197.4774886 |                 | 1197.4774886 | 9   | I               | 4    | 559.29995833            |
| -0.434239           | 642.75839672 |                 | 1284.509517  | 10  | S               | 3    | 446.21589435 +0.341967  |
|                     | 1341.5309807 | -0.1556145      | 1341.5309807 | 11  | G               | 2    | 359.18386594            |
| +0.0185307          | 744.7868282  | -0.1277813      | 1488.5663799 | 12  | M               | 1    | 302.16240221 +0.1847658 |
|                     |              |                 |              | 13  | K               | 0    | 155.12700298            |

Source: 20120602\_VR\_Bsu\_TripleSILAC\_pWTPPrkCPrpC\_F23  
 Scannumber: 8645  
 Protein: bdhA; BSU06240; ydjL  
 Peptide Score: 74.48  
 Method: ITMS; CID; 3

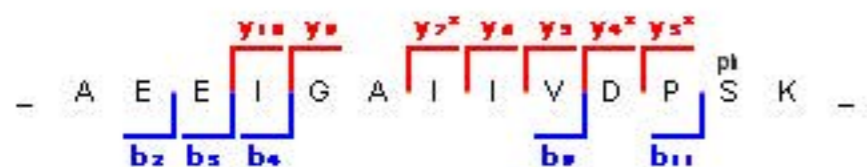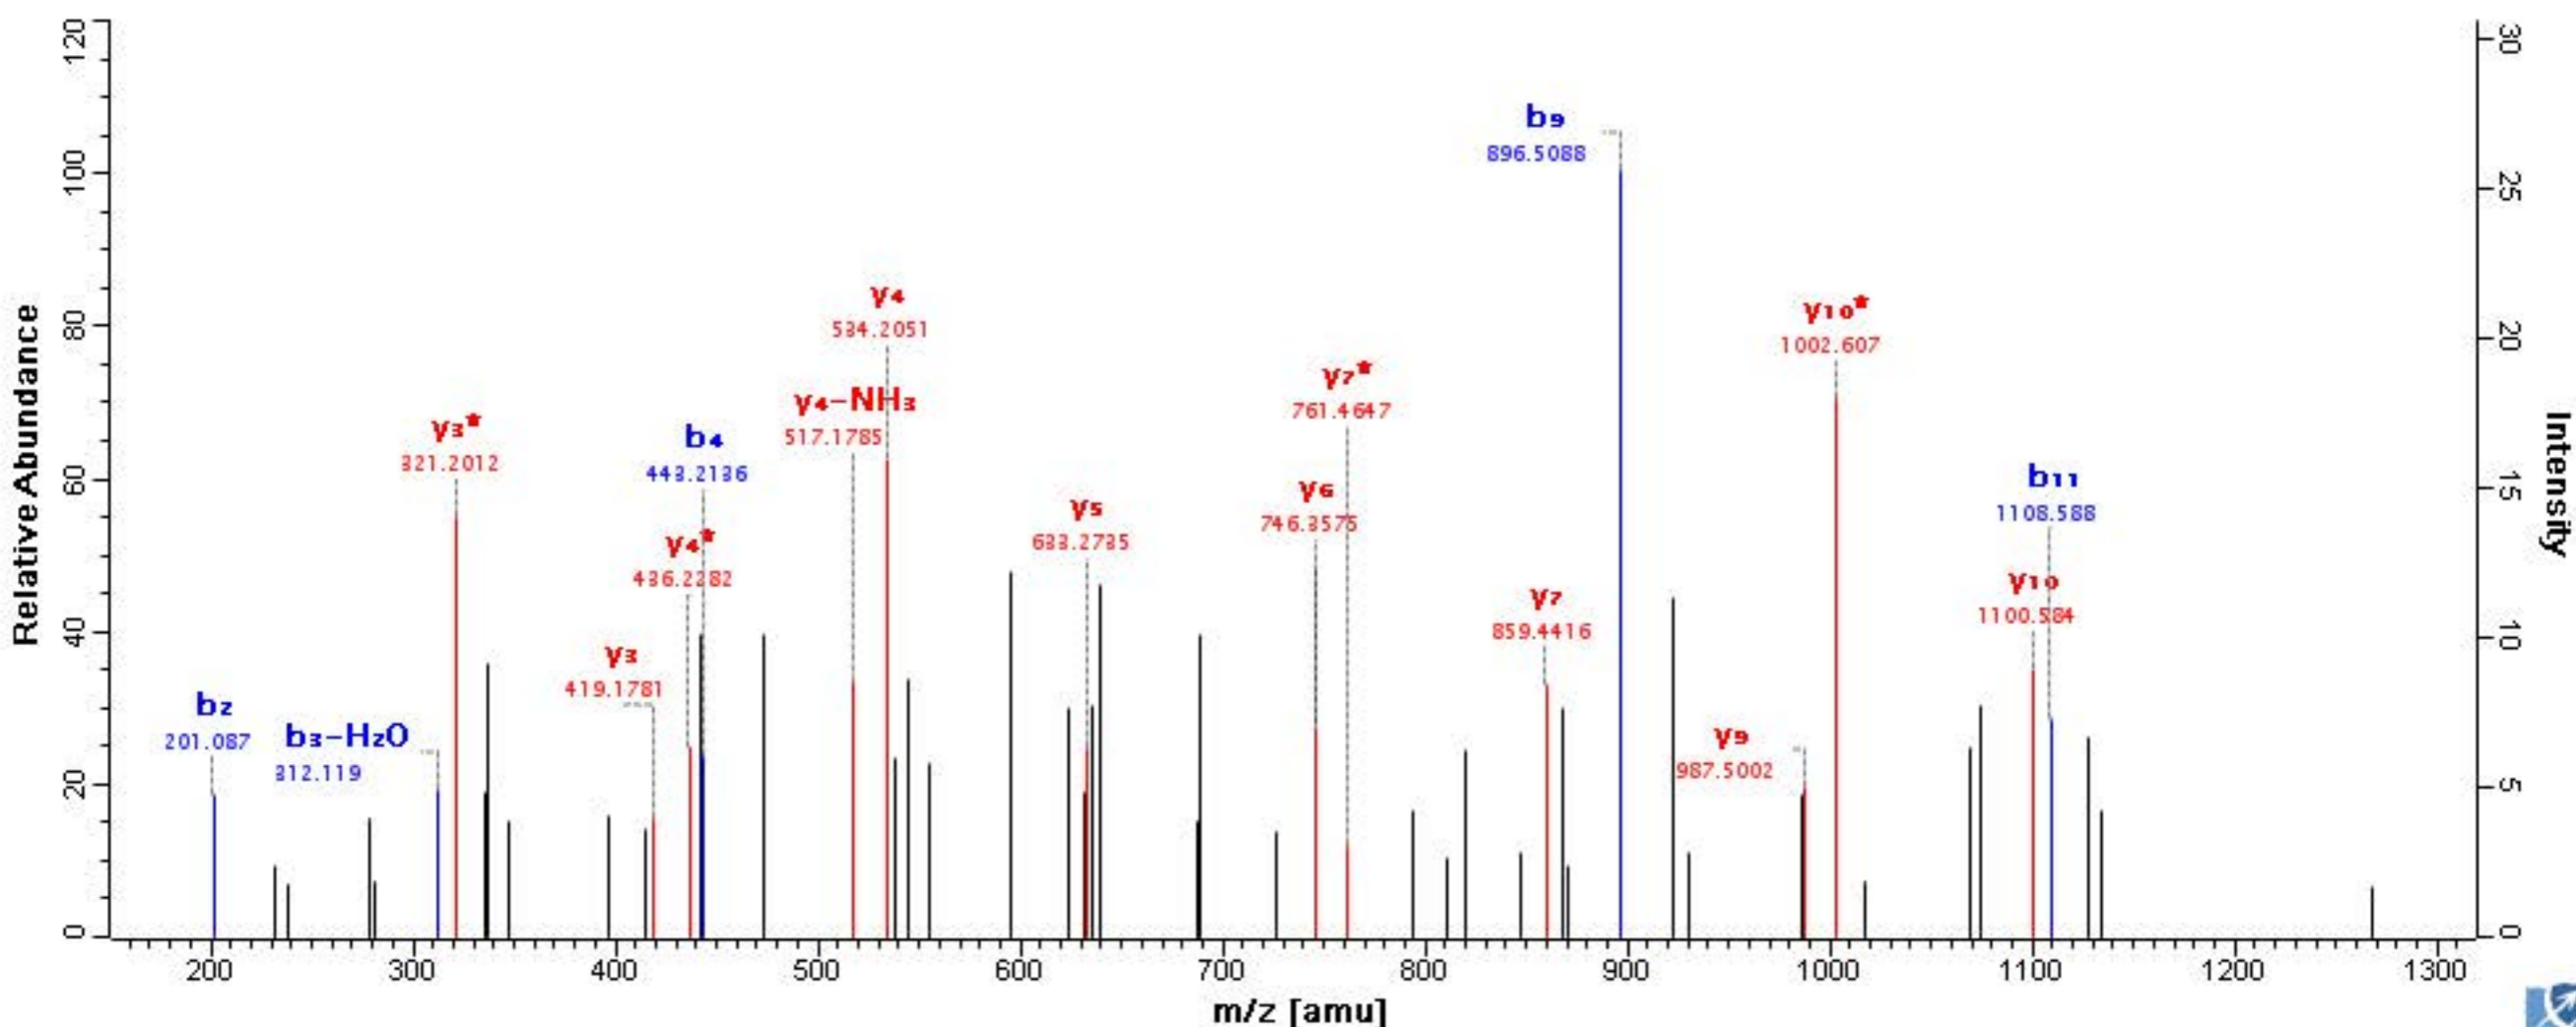

**precursor information**

|                   |                     |
|-------------------|---------------------|
| Mass:             | 1420.68494          |
| m/z:              | System.Collections. |
| Charge:           | System.Collections. |
| Retentiontime:    | System.Collections. |
| Score:            | 74.47521            |
| Mass Error [ppm]: | -0.097729           |
| PEP:              | 0.0079301           |
| Precursor Type:   | MULTI               |

**general information**

|                       |             |
|-----------------------|-------------|
| Annotation:           | 9 of 13     |
| AminoAcids Coverag    | 69 %        |
| Intensity Coverage:   | 41 %        |
| Protein Localisation: | 209 ... 221 |

| b ion      |                |    |     |    |                | y ion      |  |
|------------|----------------|----|-----|----|----------------|------------|--|
| Δ dalton   | mass           |    | seq |    | Δ dalton       | mass       |  |
|            | 72.044390254   | 1  | A   | 12 |                |            |  |
| +0.1455301 | 201.086983351  | 2  | E   | 11 | 1358.669438247 |            |  |
|            | 330.129576447  | 3  | E   | 10 | 1229.626845151 |            |  |
| +0.1786936 | 443.213640427  | 4  | I   | 9  | 1100.584252055 | +0.2586435 |  |
|            | 500.235104151  | 5  | G   | 8  | 987.500188074  | +0.1654003 |  |
|            | 571.272217939  | 6  | A   | 7  | 930.478724351  |            |  |
|            | 684.356281919  | 7  | I   | 6  | 859.441610563  | +0.1786287 |  |
|            | 797.440345899  | 8  | I   | 5  | 746.357546583  | -0.0213649 |  |
| +0.1448046 | 896.508759816  | 9  | V   | 4  | 633.273482602  | +0.1632239 |  |
|            | 1011.535702848 | 10 | D   | 3  | 534.205068686  | +0.1193942 |  |
| +0.351963  | 1108.5884667   | 11 | P   | 2  | 419.178125654  | +0.0040033 |  |
|            | 1275.586825518 | 12 | S   | 1  | 322.125361802  |            |  |
|            |                | 13 | K   | 0  | 155.127002984  |            |  |

Source: 20120602\_VR\_Bsu\_TripleSILAC\_pWTPrkCPrpC\_F23  
 Scannumber: 9610  
 Protein: BSU29490; tpx: ytgI  
 Peptide Score: 135.29  
 Method: ITMS; CID; 3

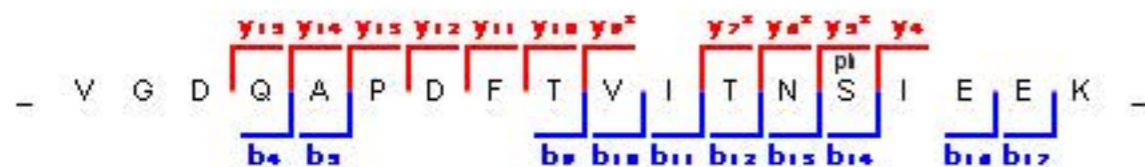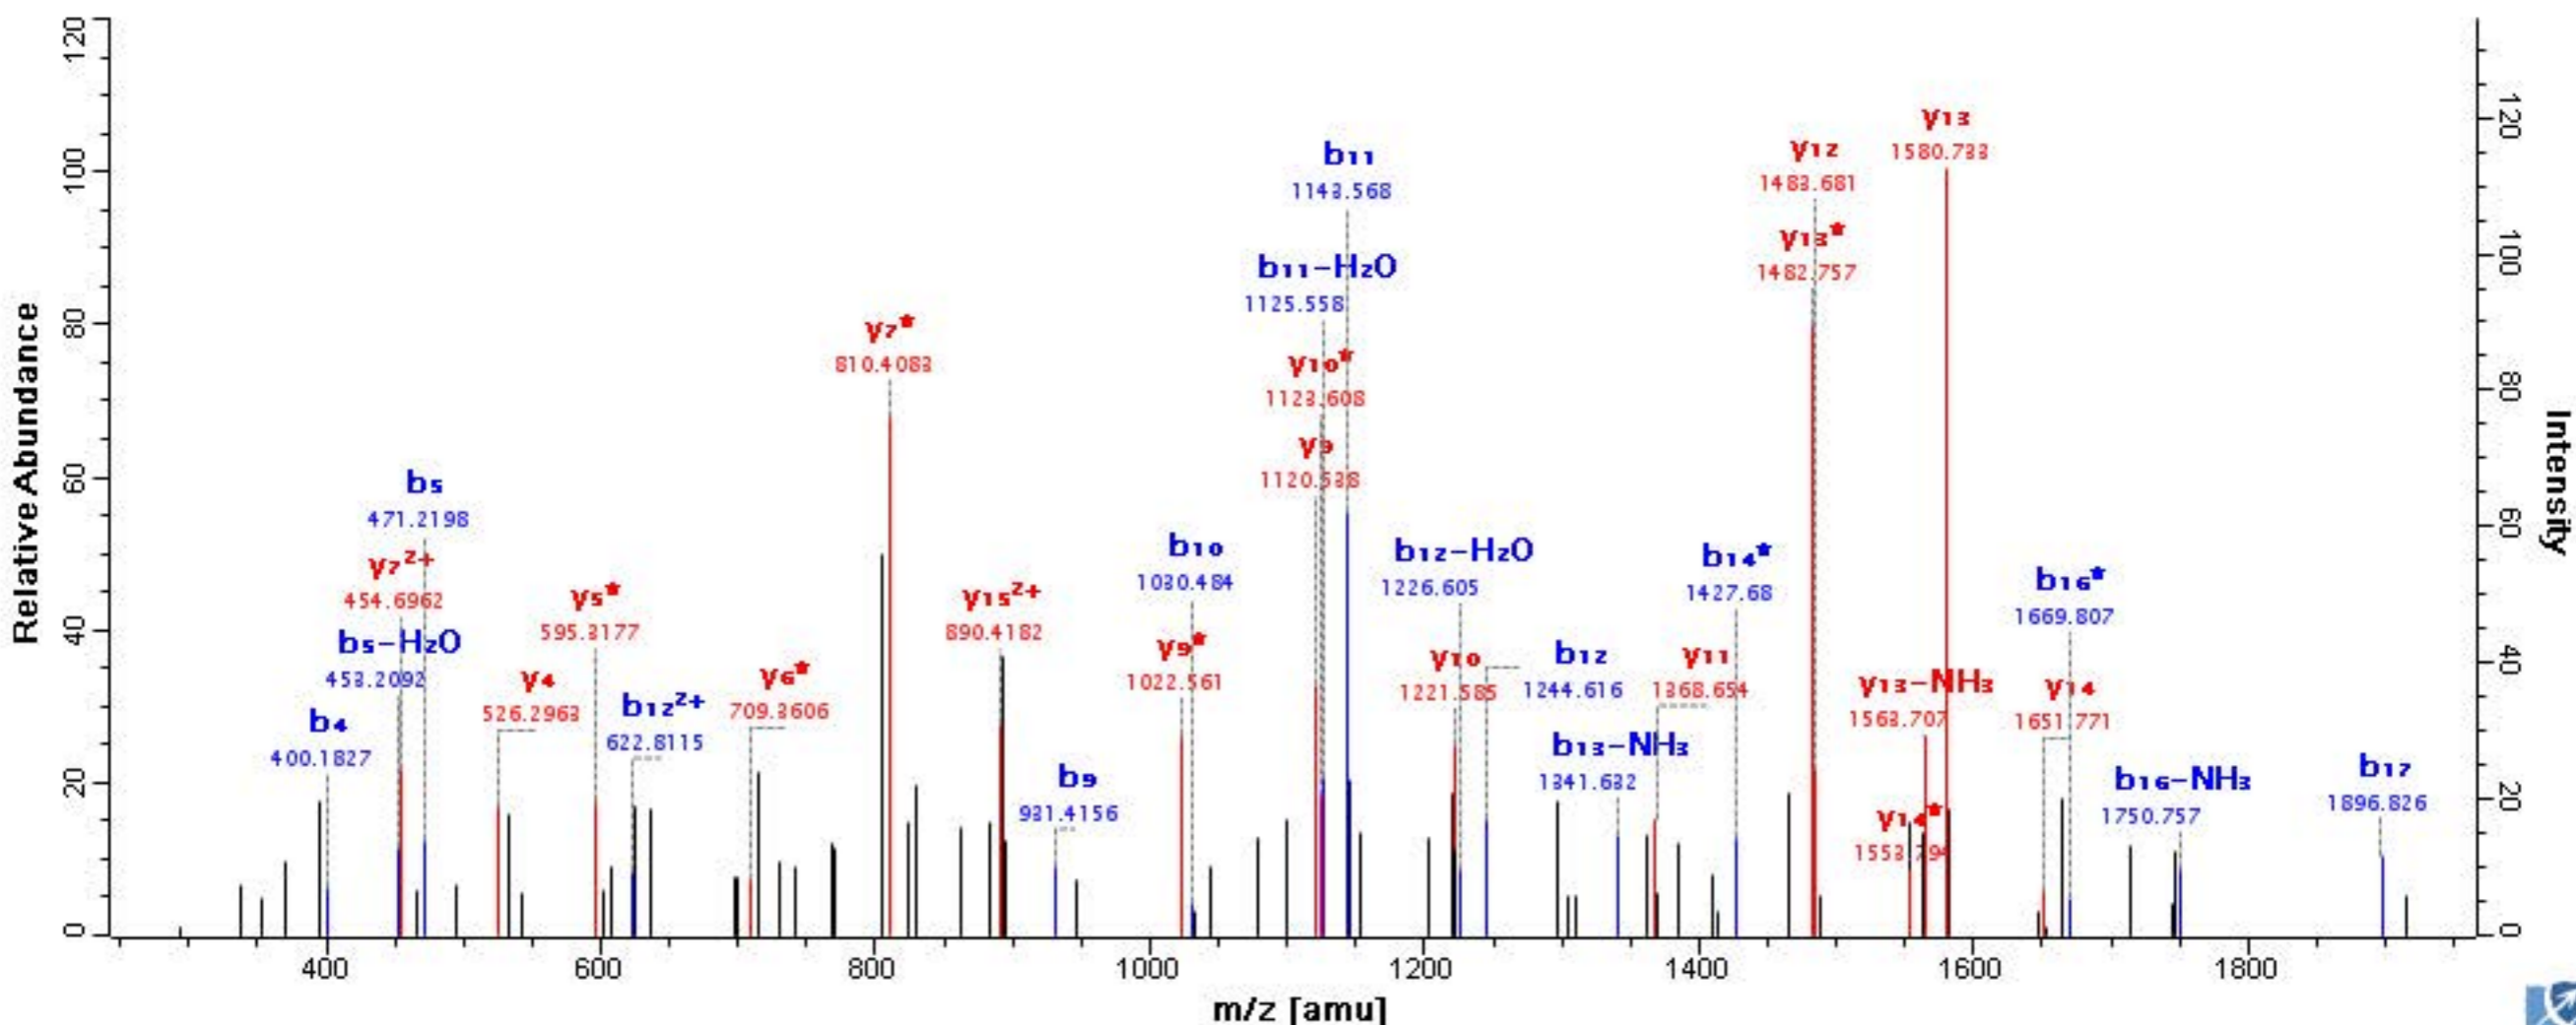

#### precursor information

|                   |                     |
|-------------------|---------------------|
| Mass:             | 2041.92372          |
| m/z:              | System.Collections. |
| Charge:           | System.Collections. |
| Retentiontime:    | System.Collections. |
| Score:            | 135.2923            |
| Mass Error [ppm]: | -0.39608            |
| PEP:              | 4.6547E-20          |
| Precursor Type:   | MULTI               |

#### general information

|                       |           |
|-----------------------|-----------|
| Annotation:           | 14 of 18  |
| AminoAcids Coverage:  | 78 %      |
| Intensity Coverage:   | 51 %      |
| Protein Localisation: | 20 ... 37 |

| b <sup>2+</sup> ion |          | b ion     |          | seq |   |    | γ ion    |           | γ <sup>2+</sup> ion |           |
|---------------------|----------|-----------|----------|-----|---|----|----------|-----------|---------------------|-----------|
| Δ dalton            | mass     | Δ dalton  | mass     |     |   |    | Δ dalton | mass      | Δ dalton            | mass      |
|                     | 100.0757 |           | 100.0757 | 1   | V | 17 |          |           |                     |           |
|                     | 157.0972 |           | 157.0972 | 2   | G | 16 | 1951.878 |           | 1951.878            |           |
|                     | 272.1241 |           | 272.1241 | 3   | D | 15 | 1894.856 |           | 1894.856            |           |
|                     | 400.1827 | -0.028134 | 400.1827 | 4   | Q | 14 | 1779.829 |           | 890.4182            | +0.117779 |
|                     | 471.2198 | -0.085481 | 471.2198 | 5   | A | 13 | 1651.771 | -0.082499 | 1651.771            |           |
|                     | 568.2726 |           | 568.2726 | 6   | P | 12 | 1580.733 | +0.0917   | 1580.733            |           |
|                     | 683.2995 |           | 683.2995 | 7   | D | 11 | 1483.681 | +0.192804 | 1483.681            |           |
|                     | 830.3679 |           | 830.3679 | 8   | F | 10 | 1368.654 | -0.454447 | 1368.654            |           |
|                     | 931.4156 | +0.052674 | 931.4156 | 9   | T | 9  | 1221.585 | +0.136916 | 1221.585            |           |
|                     | 1030.484 | +0.060066 | 1030.484 | 10  | V | 8  | 1120.538 | -0.133155 | 1120.538            |           |
|                     | 1143.568 | +0.134571 | 1143.568 | 11  | I | 7  | 1021.469 |           | 1021.469            |           |
| -0.207201           | 622.8115 | -0.372092 | 1244.616 | 12  | T | 6  | 908.3852 |           | 454.6962            | -0.355305 |
|                     | 1358.659 |           | 1358.659 | 13  | N | 5  | 807.3375 |           | 807.3375            |           |
|                     | 1525.657 |           | 1525.657 | 14  | S | 4  | 693.2946 |           | 693.2946            |           |
|                     | 1638.741 |           | 1638.741 | 15  | I | 3  | 526.2963 | -0.105701 | 526.2963            |           |
|                     | 1767.784 |           | 1767.784 | 16  | E | 2  | 413.2122 |           | 413.2122            |           |
|                     | 1896.826 | +0.377577 | 1896.826 | 17  | E | 1  | 284.1696 |           | 284.1696            |           |
|                     |          |           |          | 18  | K | 0  | 155.127  |           | 155.127             |           |

Source: 20120602\_VR\_Bsu\_TripleSILAC\_pWTPPrkCPrpC\_F23  
 Scannumber: 9311  
 Protein: BSU16510; pyrH; smbA  
 Peptide Score: 88.5  
 Method: ITMS; CID; 3

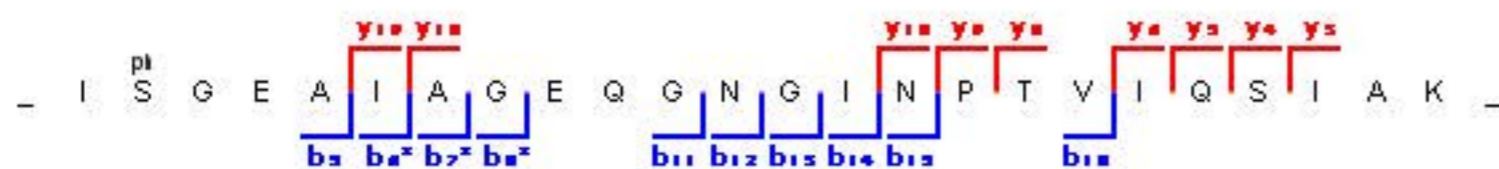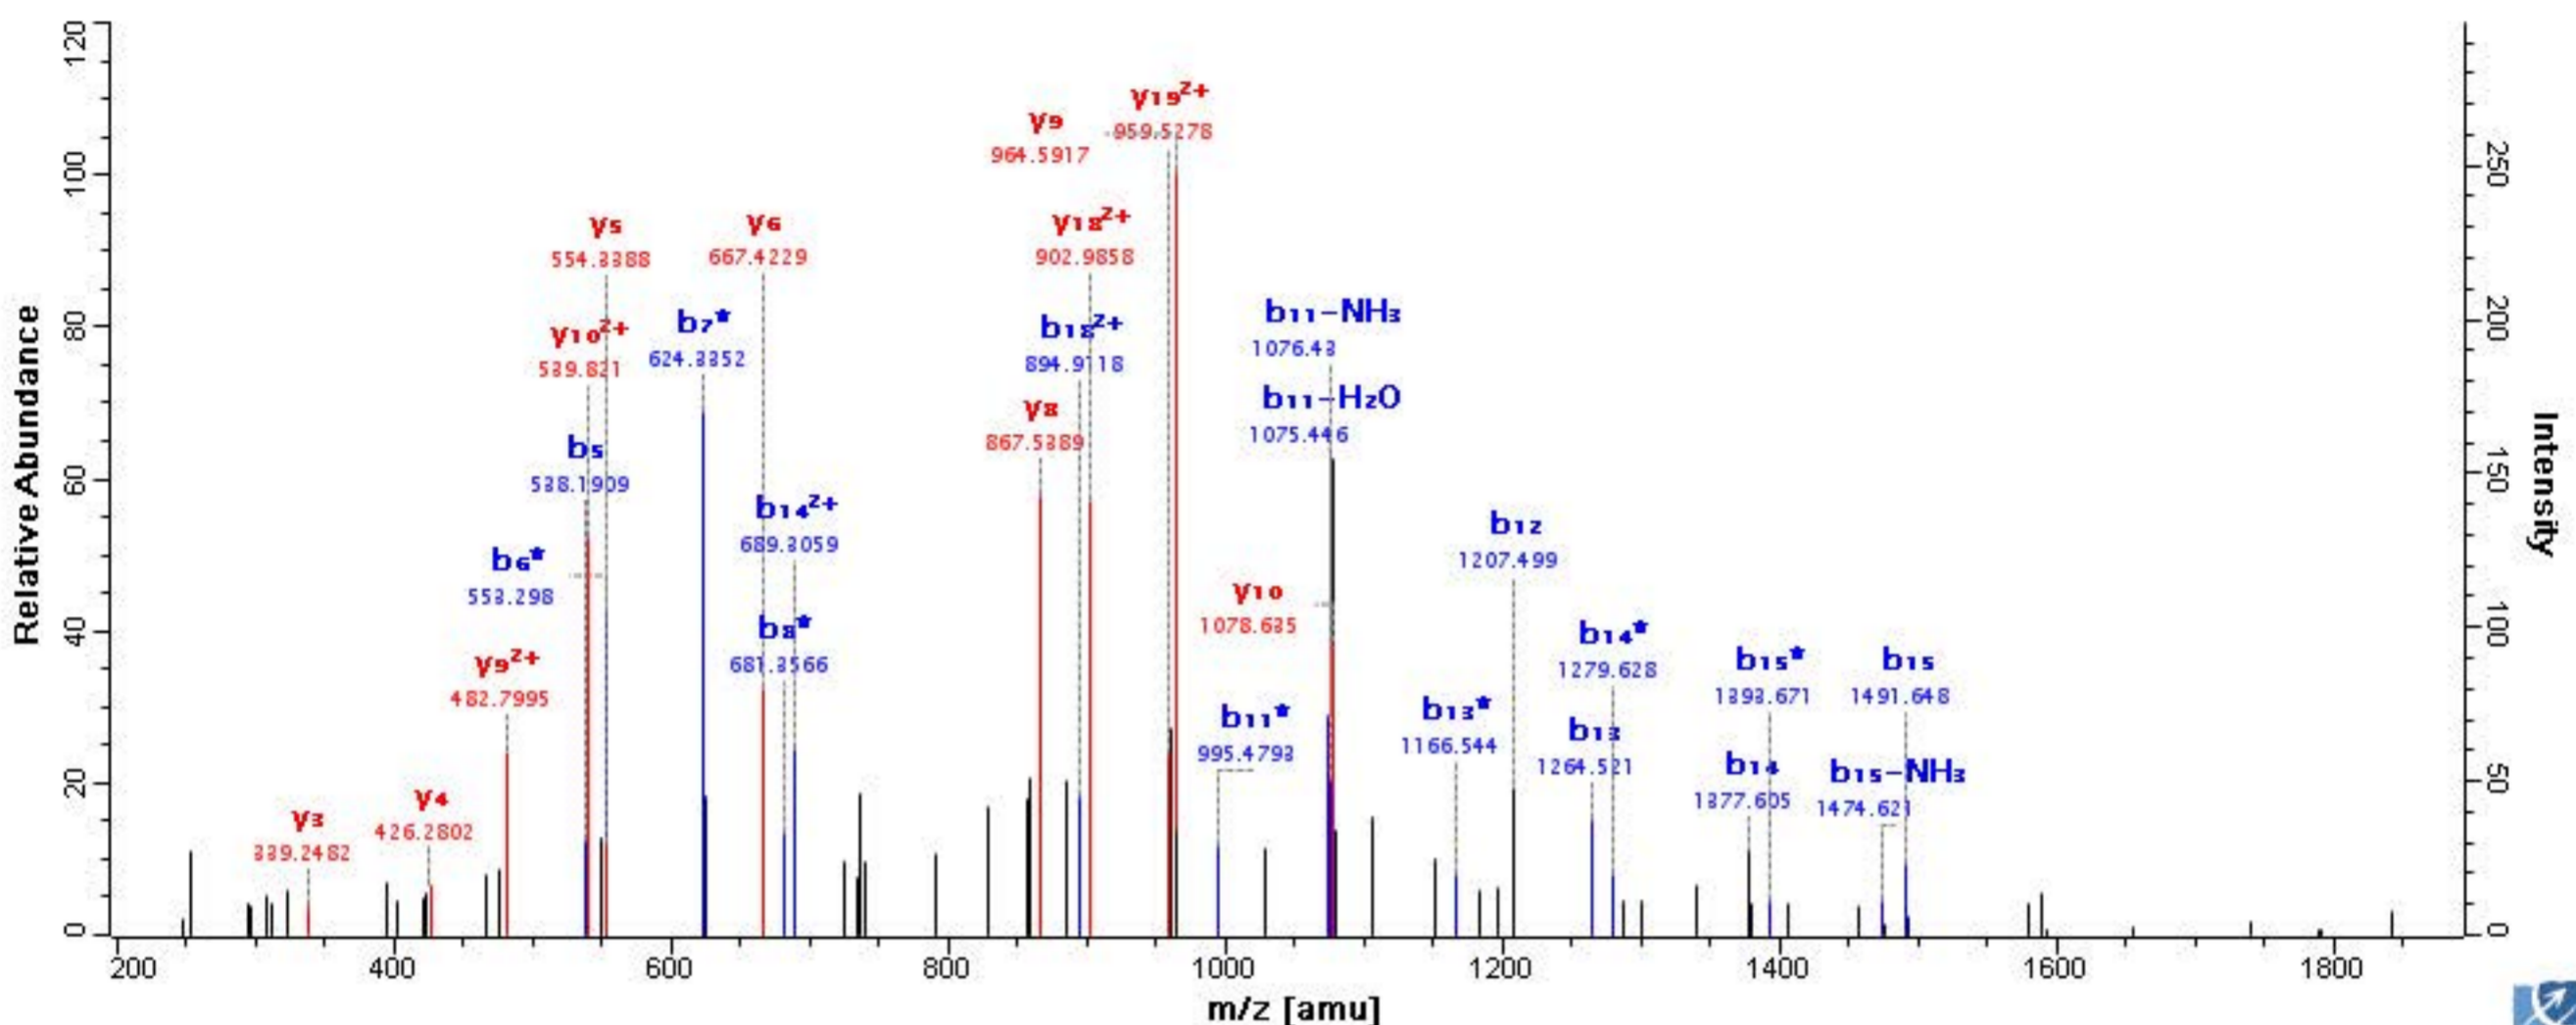

#### precursor information

|                   |                     |
|-------------------|---------------------|
| Mass:             | 2446.20979          |
| m/z:              | System.Collections. |
| Charge:           | System.Collections. |
| Retentiontime:    | System.Collections. |
| Score:            | 88.50416            |
| Mass Error [ppm]: | -0.28186            |
| PEP:              | 4.569E-08           |
| Precursor Type:   | MULTI               |

| b <sup>2+</sup> ion |          | b ion     |          |    |     |    | y ion    |           | y <sup>2+</sup> ion |           |
|---------------------|----------|-----------|----------|----|-----|----|----------|-----------|---------------------|-----------|
| Δ dalton            | mass     | Δ dalton  | mass     |    | seq |    | Δ dalton | mass      | Δ dalton            | mass      |
|                     | 114.0913 |           | 114.0913 | 1  | I   | 23 |          |           |                     |           |
|                     | 281.0897 |           | 281.0897 | 2  | S   | 22 | 2342.148 |           | 2342.148            |           |
|                     | 338.1112 |           | 338.1112 | 3  | G   | 21 | 2175.15  |           | 2175.15             |           |
|                     | 467.1538 |           | 467.1538 | 4  | E   | 20 | 2118.128 |           | 2118.128            |           |
|                     | 538.1909 | -0.00984  | 538.1909 | 5  | A   | 19 | 1989.085 |           | 1989.085            |           |
|                     | 651.2749 |           | 651.2749 | 6  | I   | 18 | 1918.048 |           | 959.5278            | +0.046215 |
|                     | 722.312  |           | 722.312  | 7  | A   | 17 | 1804.964 |           | 902.9858            | +0.193227 |
|                     | 779.3335 |           | 779.3335 | 8  | G   | 16 | 1733.927 |           | 1733.927            |           |
|                     | 908.3761 |           | 908.3761 | 9  | E   | 15 | 1676.906 |           | 1676.906            |           |
|                     | 1036.435 |           | 1036.435 | 10 | Q   | 14 | 1547.863 |           | 1547.863            |           |
|                     | 1093.456 |           | 1093.456 | 11 | G   | 13 | 1419.805 |           | 1419.805            |           |
|                     | 1207.499 | +0.153026 | 1207.499 | 12 | N   | 12 | 1362.783 |           | 1362.783            |           |
|                     | 1264.521 | -0.076567 | 1264.521 | 13 | G   | 11 | 1248.74  |           | 1248.74             |           |
| +0.051971           | 689.3059 | +0.103529 | 1377.605 | 14 | I   | 10 | 1191.719 |           | 1191.719            |           |
|                     | 1491.648 | +0.05169  | 1491.648 | 15 | N   | 9  | 1078.635 | +0.340952 | 539.821             | +0.073515 |
|                     | 1588.7   |           | 1588.7   | 16 | P   | 8  | 964.5917 | +0.00479  | 482.7995            | +0.042671 |
|                     | 1689.748 |           | 1689.748 | 17 | T   | 7  | 867.5389 | +0.027341 | 867.5389            |           |
| -0.428859           | 894.9118 |           | 1788.816 | 18 | V   | 6  | 766.4913 |           | 766.4913            |           |
|                     | 1901.9   |           | 1901.9   | 19 | I   | 5  | 667.4229 | +0.143128 | 667.4229            |           |
|                     | 2029.959 |           | 2029.959 | 20 | Q   | 4  | 554.3388 | +0.080891 | 554.3388            |           |
|                     | 2116.991 |           | 2116.991 | 21 | S   | 3  | 426.2802 | +0.334476 | 426.2802            |           |
|                     | 2230.075 |           | 2230.075 | 22 | I   | 2  | 339.2482 | +0.196582 | 339.2482            |           |
|                     | 2301.112 |           | 2301.112 | 23 | A   | 1  | 226.1641 |           | 226.1641            |           |
|                     |          |           |          | 24 | K   | 0  | 155.127  |           | 155.127             |           |

#### general information

|                       |           |
|-----------------------|-----------|
| Annotation:           | 16 of 24  |
| AminoAcids Coverag    | 67 %      |
| Intensity Coverage:   | 58 %      |
| Protein Localisation: | 13 ... 36 |



Source: 20130121\_VR\_Bsu\_TripleSILAC\_pWTPrkCPrpCReplicate2\_FD3  
 Scannumber: 10898  
 Protein: BSU23860; yqjl  
 Peptide Score: 135.09  
 Method: ITMS; CID; 3

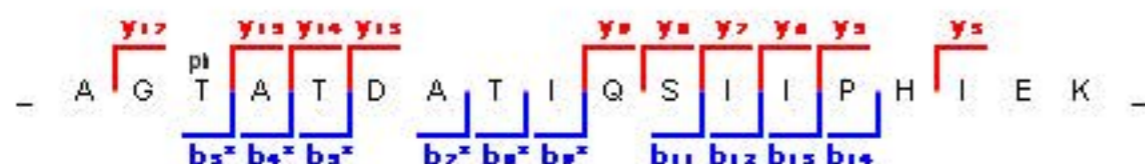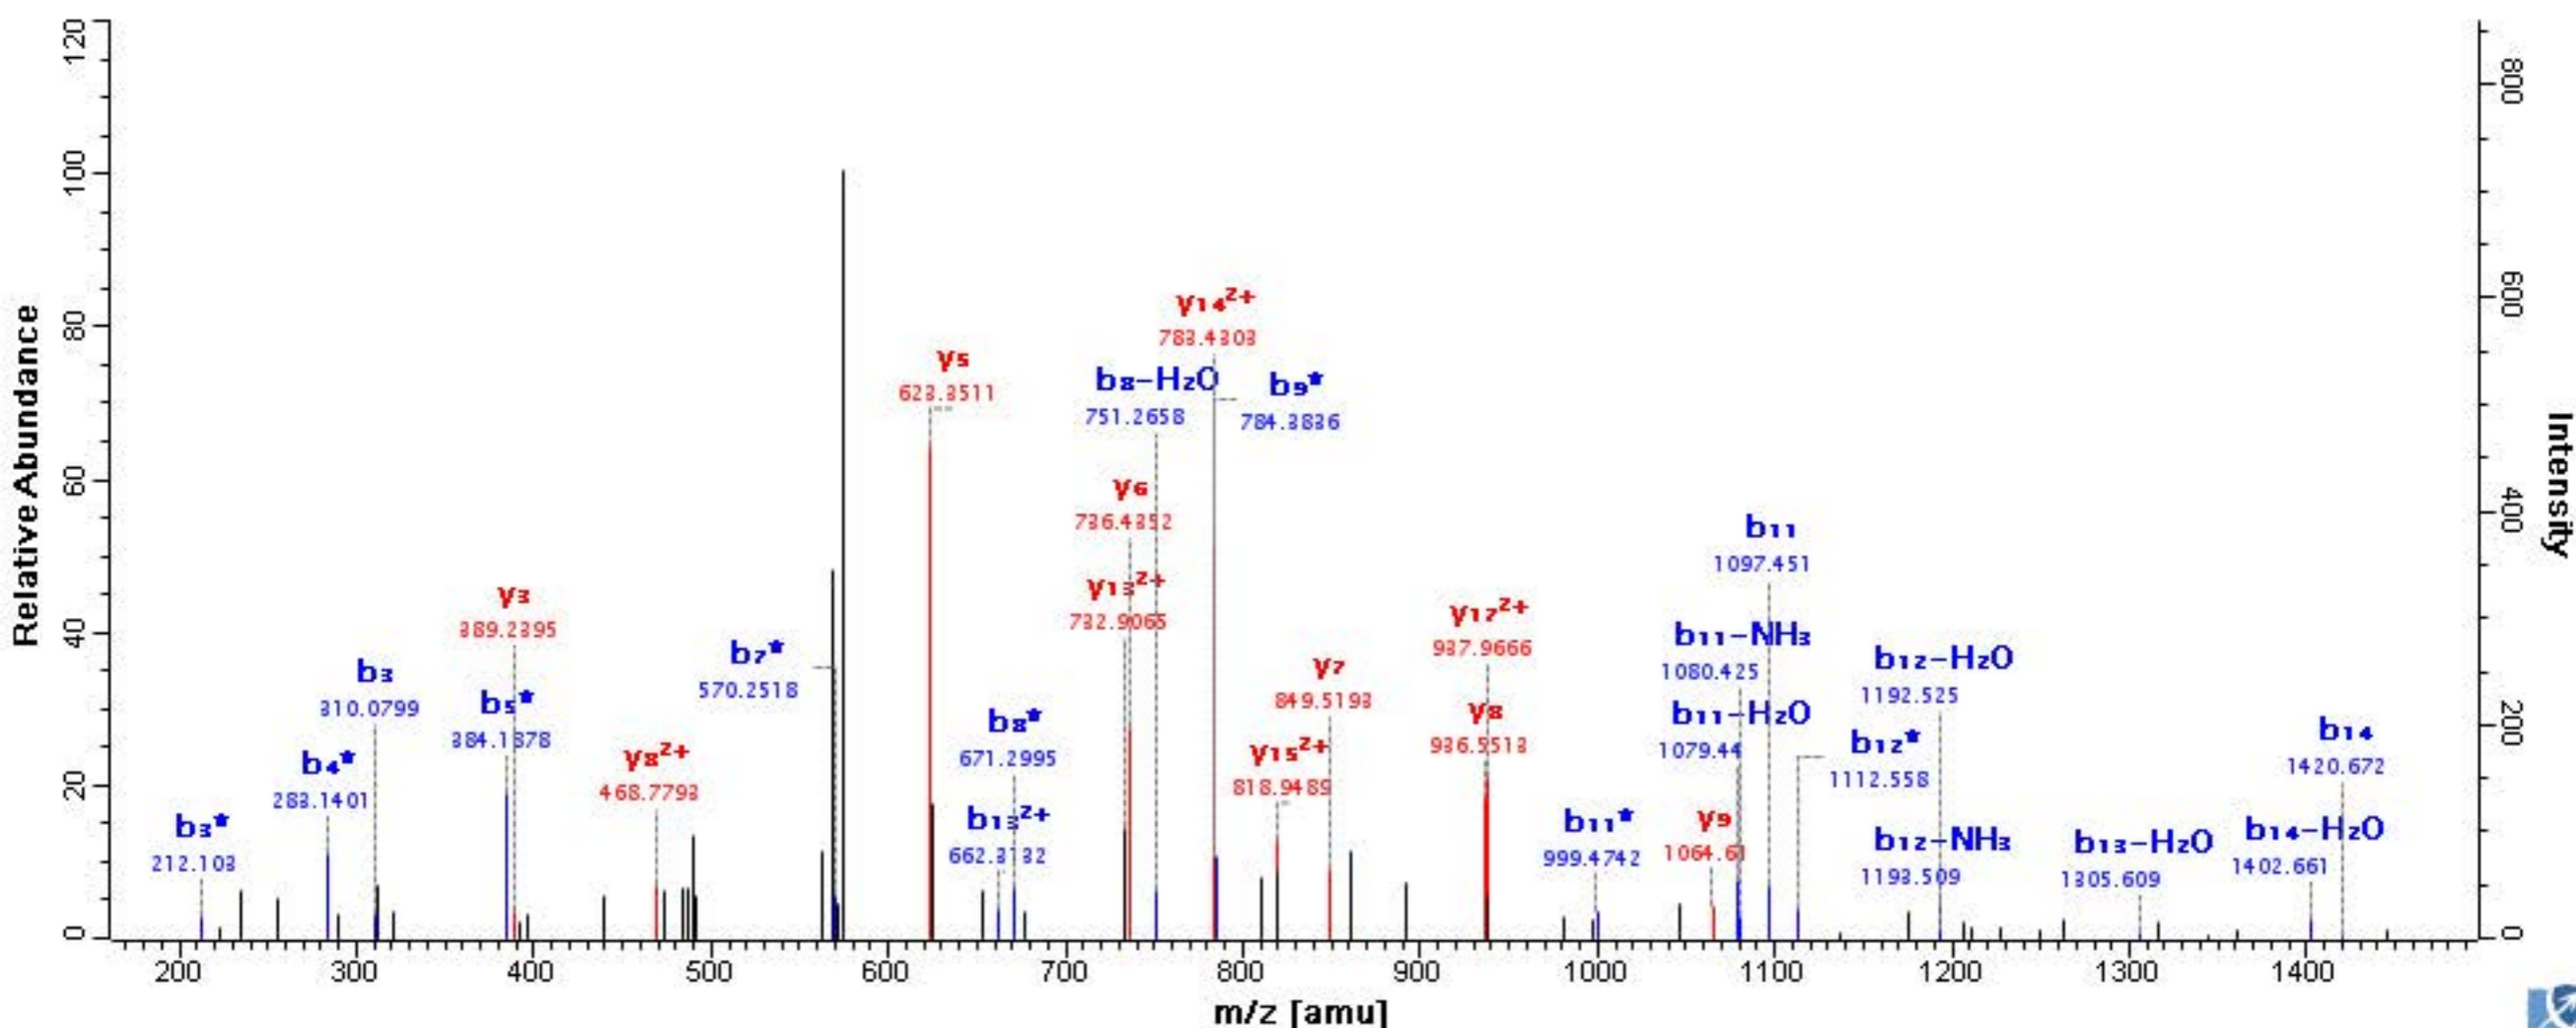

#### precursor information

|                   |                     |
|-------------------|---------------------|
| Mass:             | 1944.95561          |
| m/z:              | System.Collections. |
| Charge:           | System.Collections. |
| Retentiontime:    | System.Collections. |
| Score:            | 135.0898            |
| Mass Error [ppm]: | -0.085325           |
| PEP:              | 4.7903E-20          |
| Precursor Type:   | MULTI               |

| b <sup>2+</sup> ion |          | b ion     |          | seq |   |    | y ion    |           | y <sup>2+</sup> ion |           |
|---------------------|----------|-----------|----------|-----|---|----|----------|-----------|---------------------|-----------|
| Δ dalton            | mass     | Δ dalton  | mass     |     |   |    | Δ dalton | mass      | Δ dalton            | mass      |
|                     | 72.04439 |           | 72.04439 | 1   | A | 17 |          |           |                     |           |
|                     | 129.0659 |           | 129.0659 | 2   | G | 16 | 1874.926 |           | 937.9666            | -0.169487 |
|                     | 310.0799 | +0.014803 | 310.0799 | 3   | T | 15 | 1817.904 |           | 1817.904            |           |
|                     | 381.117  |           | 381.117  | 4   | A | 14 | 1636.89  |           | 818.9489            | +0.221052 |
|                     | 482.1647 |           | 482.1647 | 5   | T | 13 | 1565.853 |           | 783.4303            | +0.298264 |
|                     | 597.1916 |           | 597.1916 | 6   | D | 12 | 1464.806 |           | 732.9065            | +0.043844 |
|                     | 668.2287 |           | 668.2287 | 7   | A | 11 | 1349.779 |           | 1349.779            |           |
|                     | 769.2764 |           | 769.2764 | 8   | T | 10 | 1278.742 |           | 1278.742            |           |
|                     | 882.3605 |           | 882.3605 | 9   | I | 9  | 1177.694 |           | 1177.694            |           |
|                     | 1010.419 |           | 1010.419 | 10  | Q | 8  | 1064.61  | +0.278069 | 1064.61             |           |
|                     | 1097.451 | -0.085094 | 1097.451 | 11  | S | 7  | 936.5513 | -0.010217 | 468.7793            | +0.058606 |
|                     | 1210.535 |           | 1210.535 | 12  | I | 6  | 849.5193 | +0.072044 | 849.5193            |           |
| +0.03186            | 662.3132 |           | 1323.619 | 13  | I | 5  | 736.4352 | +0.137187 | 736.4352            |           |
|                     | 1420.672 | +0.049239 | 1420.672 | 14  | P | 4  | 623.3511 | -0.024904 | 623.3511            |           |
|                     | 1557.731 |           | 1557.731 | 15  | H | 3  | 526.2984 |           | 526.2984            |           |
|                     | 1670.815 |           | 1670.815 | 16  | I | 2  | 389.2395 | +0.042887 | 389.2395            |           |
|                     | 1799.858 |           | 1799.858 | 17  | E | 1  | 276.1554 |           | 276.1554            |           |
|                     |          |           |          | 18  | K | 0  | 147.1128 |           | 147.1128            |           |

#### general information

|                       |           |
|-----------------------|-----------|
| Annotation:           | 14 of 18  |
| AminoAcids Coverag    | 78 %      |
| Intensity Coverage:   | 48 %      |
| Protein Localisation: | 76 ... 93 |

Source: 20130121\_VR\_Bsu\_TripleSILAC\_pWTPPrkCPrpCReplicate2\_F03  
 Scannumber: 6230  
 Protein: BSU35680; ggaB  
 Peptide Score: 54.02  
 Method: ITMS; CID; 3

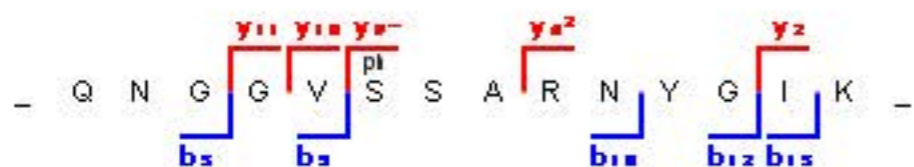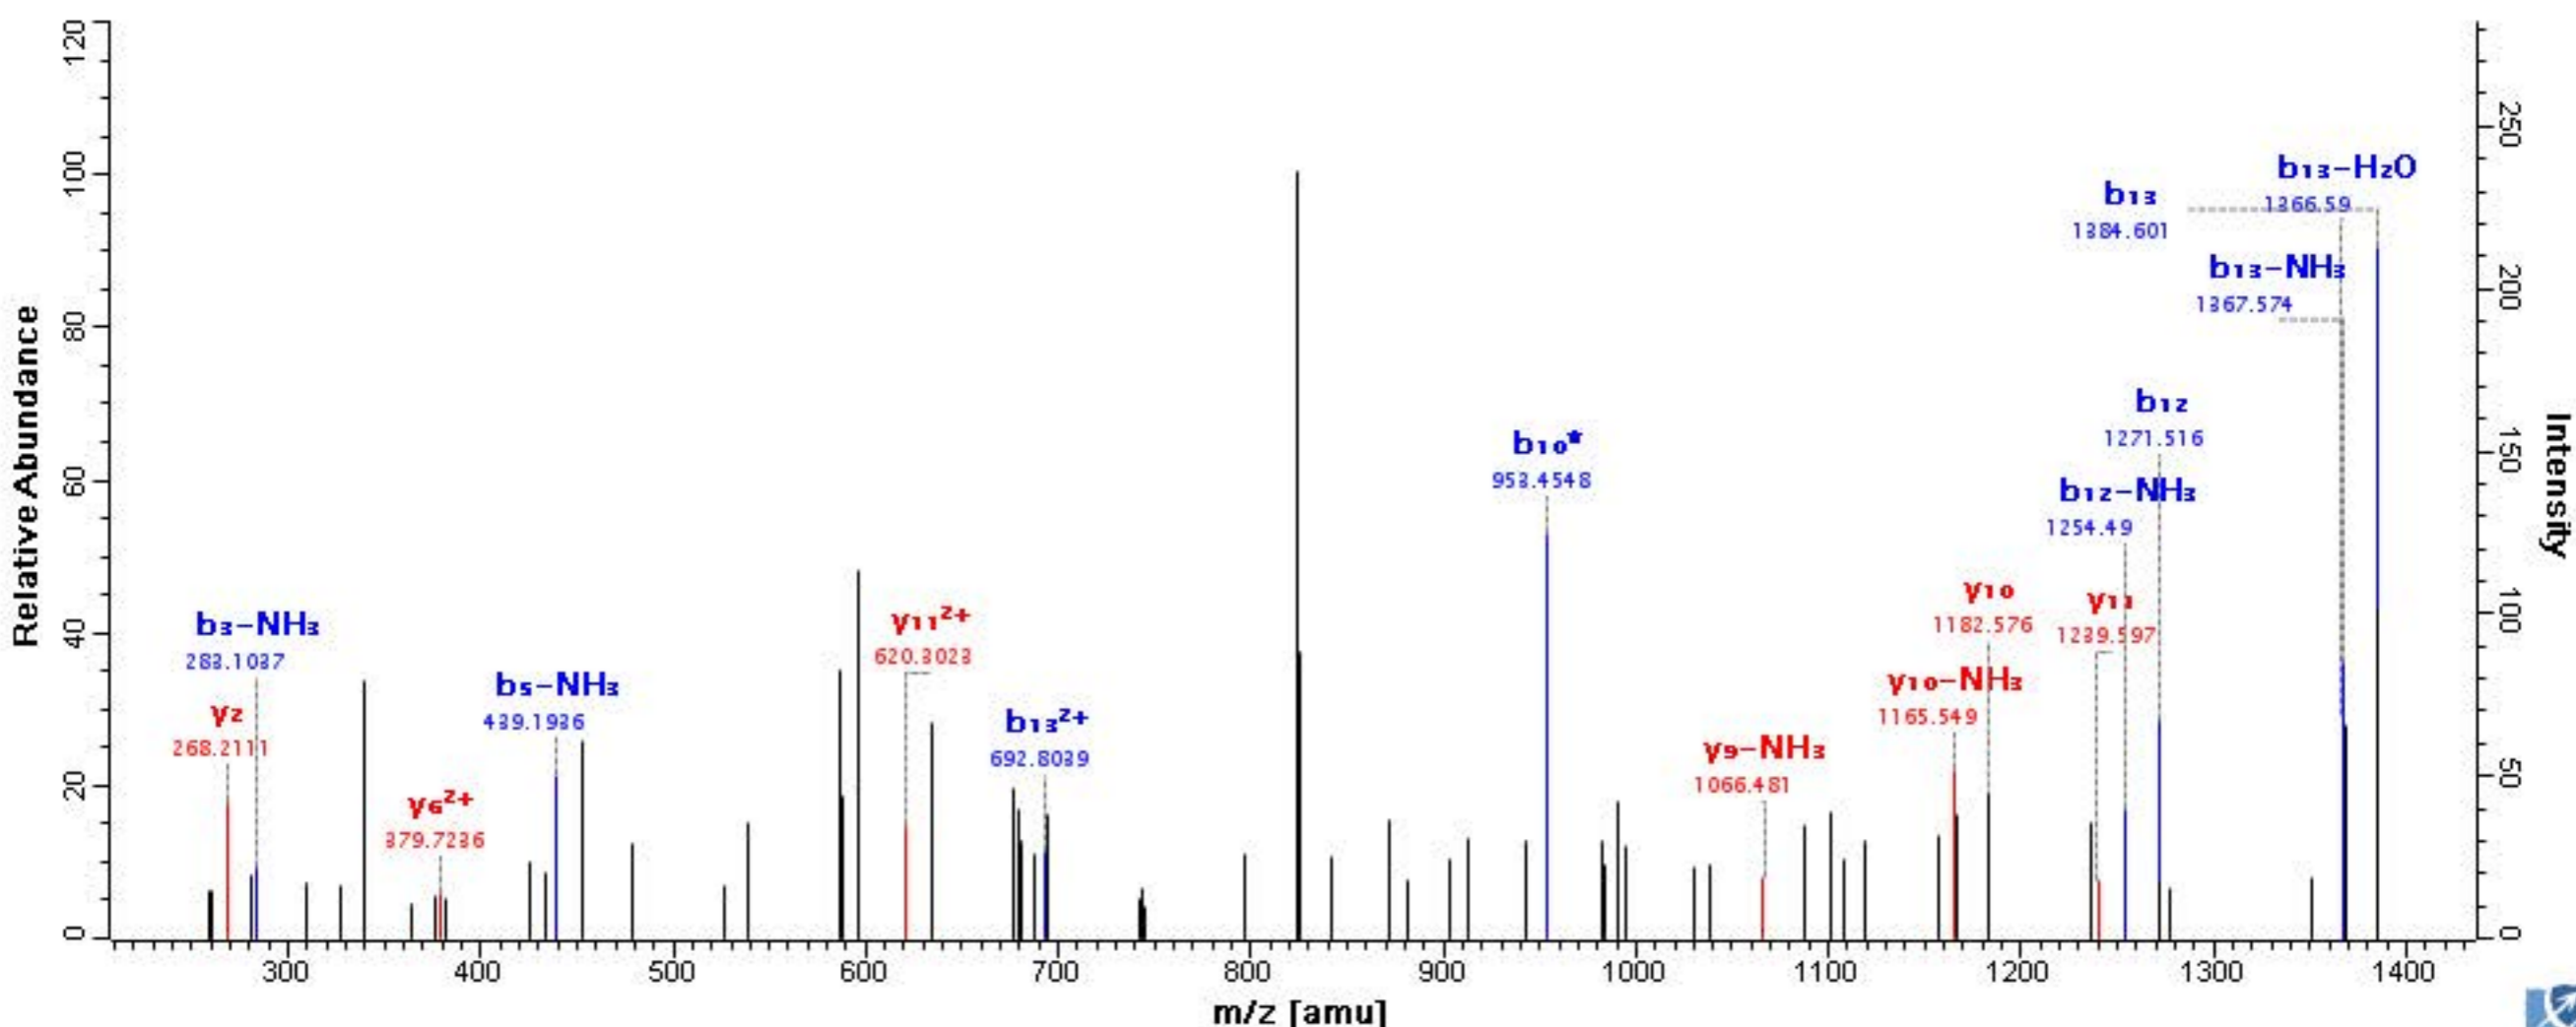

#### precursor information

|                   |                     |
|-------------------|---------------------|
| Mass:             | 1529.70026          |
| m/z:              | System.Collections. |
| Charge:           | System.Collections. |
| Retentiontime:    | System.Collections. |
| Score:            | 54.02306            |
| Mass Error [ppm]: | 0.97119             |
| PEP:              | 0.033448            |
| Precursor Type:   | MULTI               |

#### general information

|                       |           |
|-----------------------|-----------|
| Annotation:           | 9 of 14   |
| AminoAcids Coverag    | 64 %      |
| Intensity Coverage:   | 29 %      |
| Protein Localisation: | 74 ... 87 |

| b <sup>2+</sup> ion |          | b ion     |          | seq |   |    | y ion    |           | y <sup>2+</sup> ion |           |
|---------------------|----------|-----------|----------|-----|---|----|----------|-----------|---------------------|-----------|
| Δ dalton            | mass     | Δ dalton  | mass     |     |   |    | Δ dalton | mass      | Δ dalton            | mass      |
|                     | 129.0659 |           | 129.0659 | 1   | Q | 13 |          |           |                     |           |
|                     | 243.1088 |           | 243.1088 | 2   | N | 12 | 1410.662 |           | 1410.662            |           |
|                     | 300.1302 |           | 300.1302 | 3   | G | 11 | 1296.619 |           | 1296.619            |           |
|                     | 357.1517 |           | 357.1517 | 4   | G | 10 | 1239.597 | +0.418715 | 620.3023            | +0.192902 |
|                     | 456.2201 |           | 456.2201 | 5   | V | 9  | 1182.576 | +0.056145 | 1182.576            |           |
|                     | 623.2185 |           | 623.2185 | 6   | S | 8  | 1083.507 |           | 1083.507            |           |
|                     | 710.2505 |           | 710.2505 | 7   | S | 7  | 916.509  |           | 916.509             |           |
|                     | 781.2876 |           | 781.2876 | 8   | A | 6  | 829.477  |           | 829.477             |           |
|                     | 937.3887 |           | 937.3887 | 9   | R | 5  | 758.4399 |           | 379.7236            | -0.096329 |
|                     | 1051.432 |           | 1051.432 | 10  | N | 4  | 602.3388 |           | 602.3388            |           |
|                     | 1214.495 |           | 1214.495 | 11  | Y | 3  | 488.2959 |           | 488.2959            |           |
|                     | 1271.516 | -0.097998 | 1271.516 | 12  | G | 2  | 325.2325 |           | 325.2325            |           |
| -0.126529           | 692.8039 | -0.01983  | 1384.601 | 13  | I | 1  | 268.2111 | +0.106346 | 268.2111            |           |
|                     |          |           |          | 14  | K | 0  | 155.127  |           | 155.127             |           |

Source: 20130121\_VR\_Bsu\_TripleSILAC\_pWTPPrkCPrpCReplicate2\_FD3  
 Scannumber: 6247  
 Protein: arg5; BSU37330  
 Peptide Score: 91.31  
 Method: ITMS; CID; 3

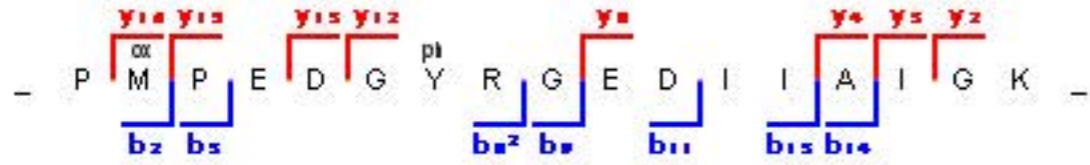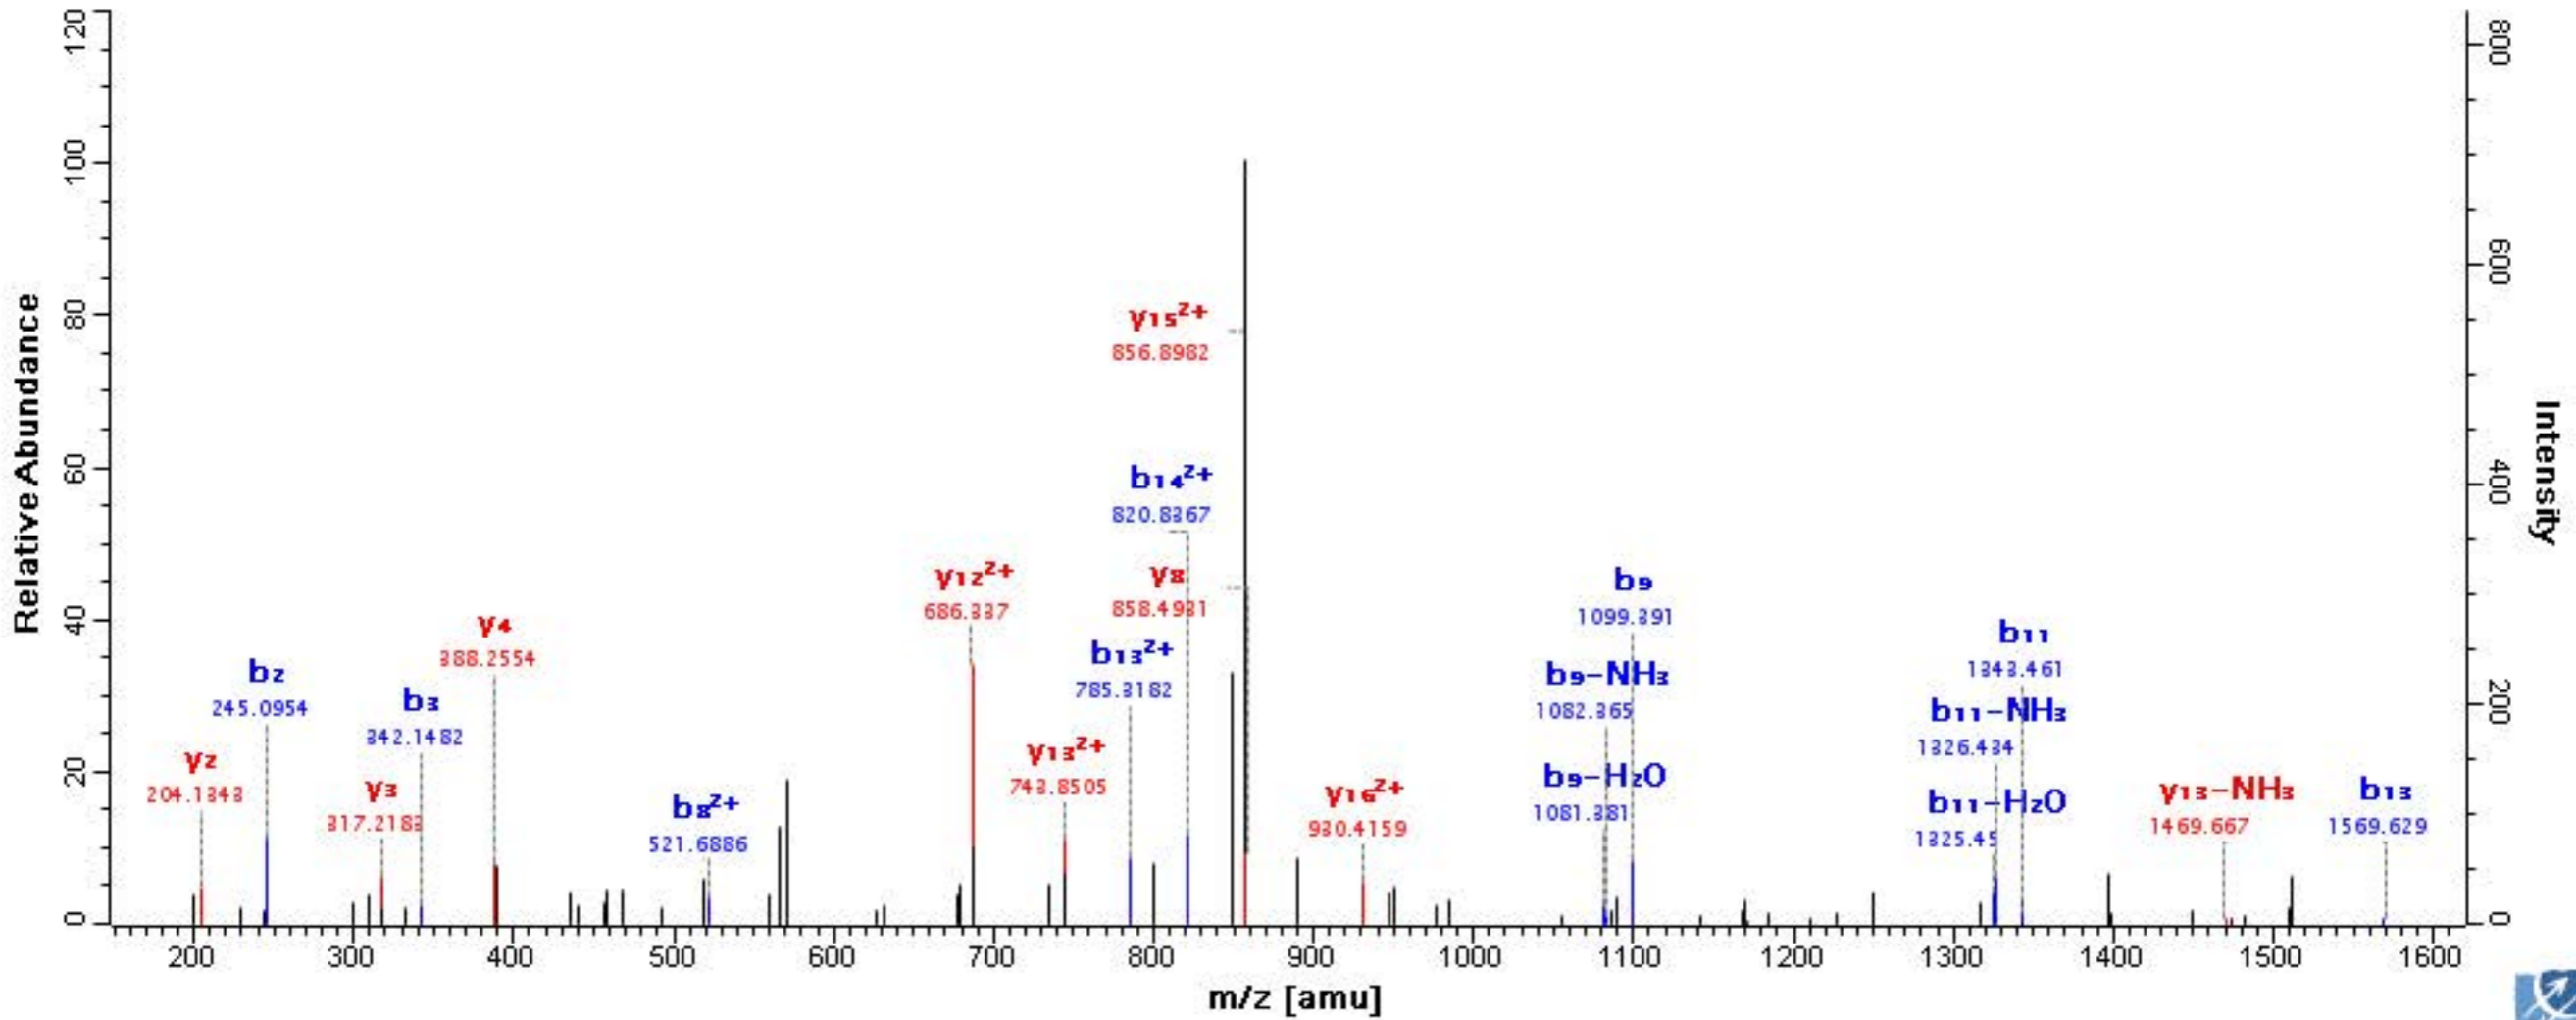

#### precursor information

|                   |                     |
|-------------------|---------------------|
| Mass:             | 1955.86903          |
| m/z:              | System.Collections. |
| Charge:           | System.Collections. |
| Retentiontime:    | System.Collections. |
| Score:            | 91.30651            |
| Mass Error [ppm]: | -0.49271            |
| PEP:              | 8.3642E-06          |
| Precursor Type:   | MULTI               |

| b <sup>2+</sup> ion |          | b ion     |          | seq |   |    | y ion    |           | y <sup>2+</sup> ion |           |
|---------------------|----------|-----------|----------|-----|---|----|----------|-----------|---------------------|-----------|
| Δ dalton            | mass     | Δ dalton  | mass     |     |   |    | Δ dalton | mass      | Δ dalton            | mass      |
|                     | 98.06004 |           | 98.06004 | 1   | P | 16 |          |           |                     |           |
|                     | 245.0954 | +0.142033 | 245.0954 | 2   | M | 15 | 1859.825 |           | 930.4159            | +0.147646 |
|                     | 342.1482 | +0.042959 | 342.1482 | 3   | P | 14 | 1712.789 |           | 856.8982            | -0.004637 |
|                     | 471.1908 |           | 471.1908 | 4   | E | 13 | 1615.736 |           | 1615.736            |           |
|                     | 586.2177 |           | 586.2177 | 5   | D | 12 | 1486.694 |           | 743.8505            | +0.408703 |
|                     | 643.2392 |           | 643.2392 | 6   | G | 11 | 1371.667 |           | 686.337             | +0.16839  |
|                     | 886.2689 |           | 886.2689 | 7   | Y | 10 | 1314.645 |           | 1314.645            |           |
| -0.321743           | 521.6886 |           | 1042.37  | 8   | R | 9  | 1071.616 |           | 1071.616            |           |
|                     | 1099.391 | +0.074505 | 1099.391 | 9   | G | 8  | 915.5146 |           | 915.5146            |           |
|                     | 1228.434 |           | 1228.434 | 10  | E | 7  | 858.4931 | -0.355109 | 858.4931            |           |
|                     | 1343.461 | +0.041102 | 1343.461 | 11  | D | 6  | 729.4505 |           | 729.4505            |           |
|                     | 1456.545 |           | 1456.545 | 12  | I | 5  | 614.4236 |           | 614.4236            |           |
| +0.012927           | 785.3182 | -0.120434 | 1569.629 | 13  | I | 4  | 501.3395 |           | 501.3395            |           |
| +0.288682           | 820.8367 |           | 1640.666 | 14  | A | 3  | 388.2554 | +0.118089 | 388.2554            |           |
|                     | 1753.75  |           | 1753.75  | 15  | I | 2  | 317.2183 | +0.173514 | 317.2183            |           |
|                     | 1810.772 |           | 1810.772 | 16  | G | 1  | 204.1343 | -0.015249 | 204.1343            |           |
|                     |          |           |          | 17  | K | 0  | 147.1128 |           | 147.1128            |           |

#### general information

|                       |             |
|-----------------------|-------------|
| Annotation:           | 12 of 17    |
| AminoAcids Coverag    | 71 %        |
| Intensity Coverage:   | 36 %        |
| Protein Localisation: | 196 ... 212 |

Source: 20130121\_VR\_Bsu\_TripleSILAC\_pWTPPrkCPrpCReplicate2\_FD3  
 Scannumber: 9877  
 Protein: BSU13200; rsbRB; ykoB  
 Peptide Score: 237.4  
 Method: ITMS; CID; 3

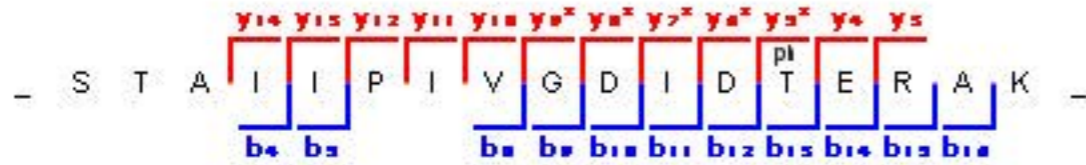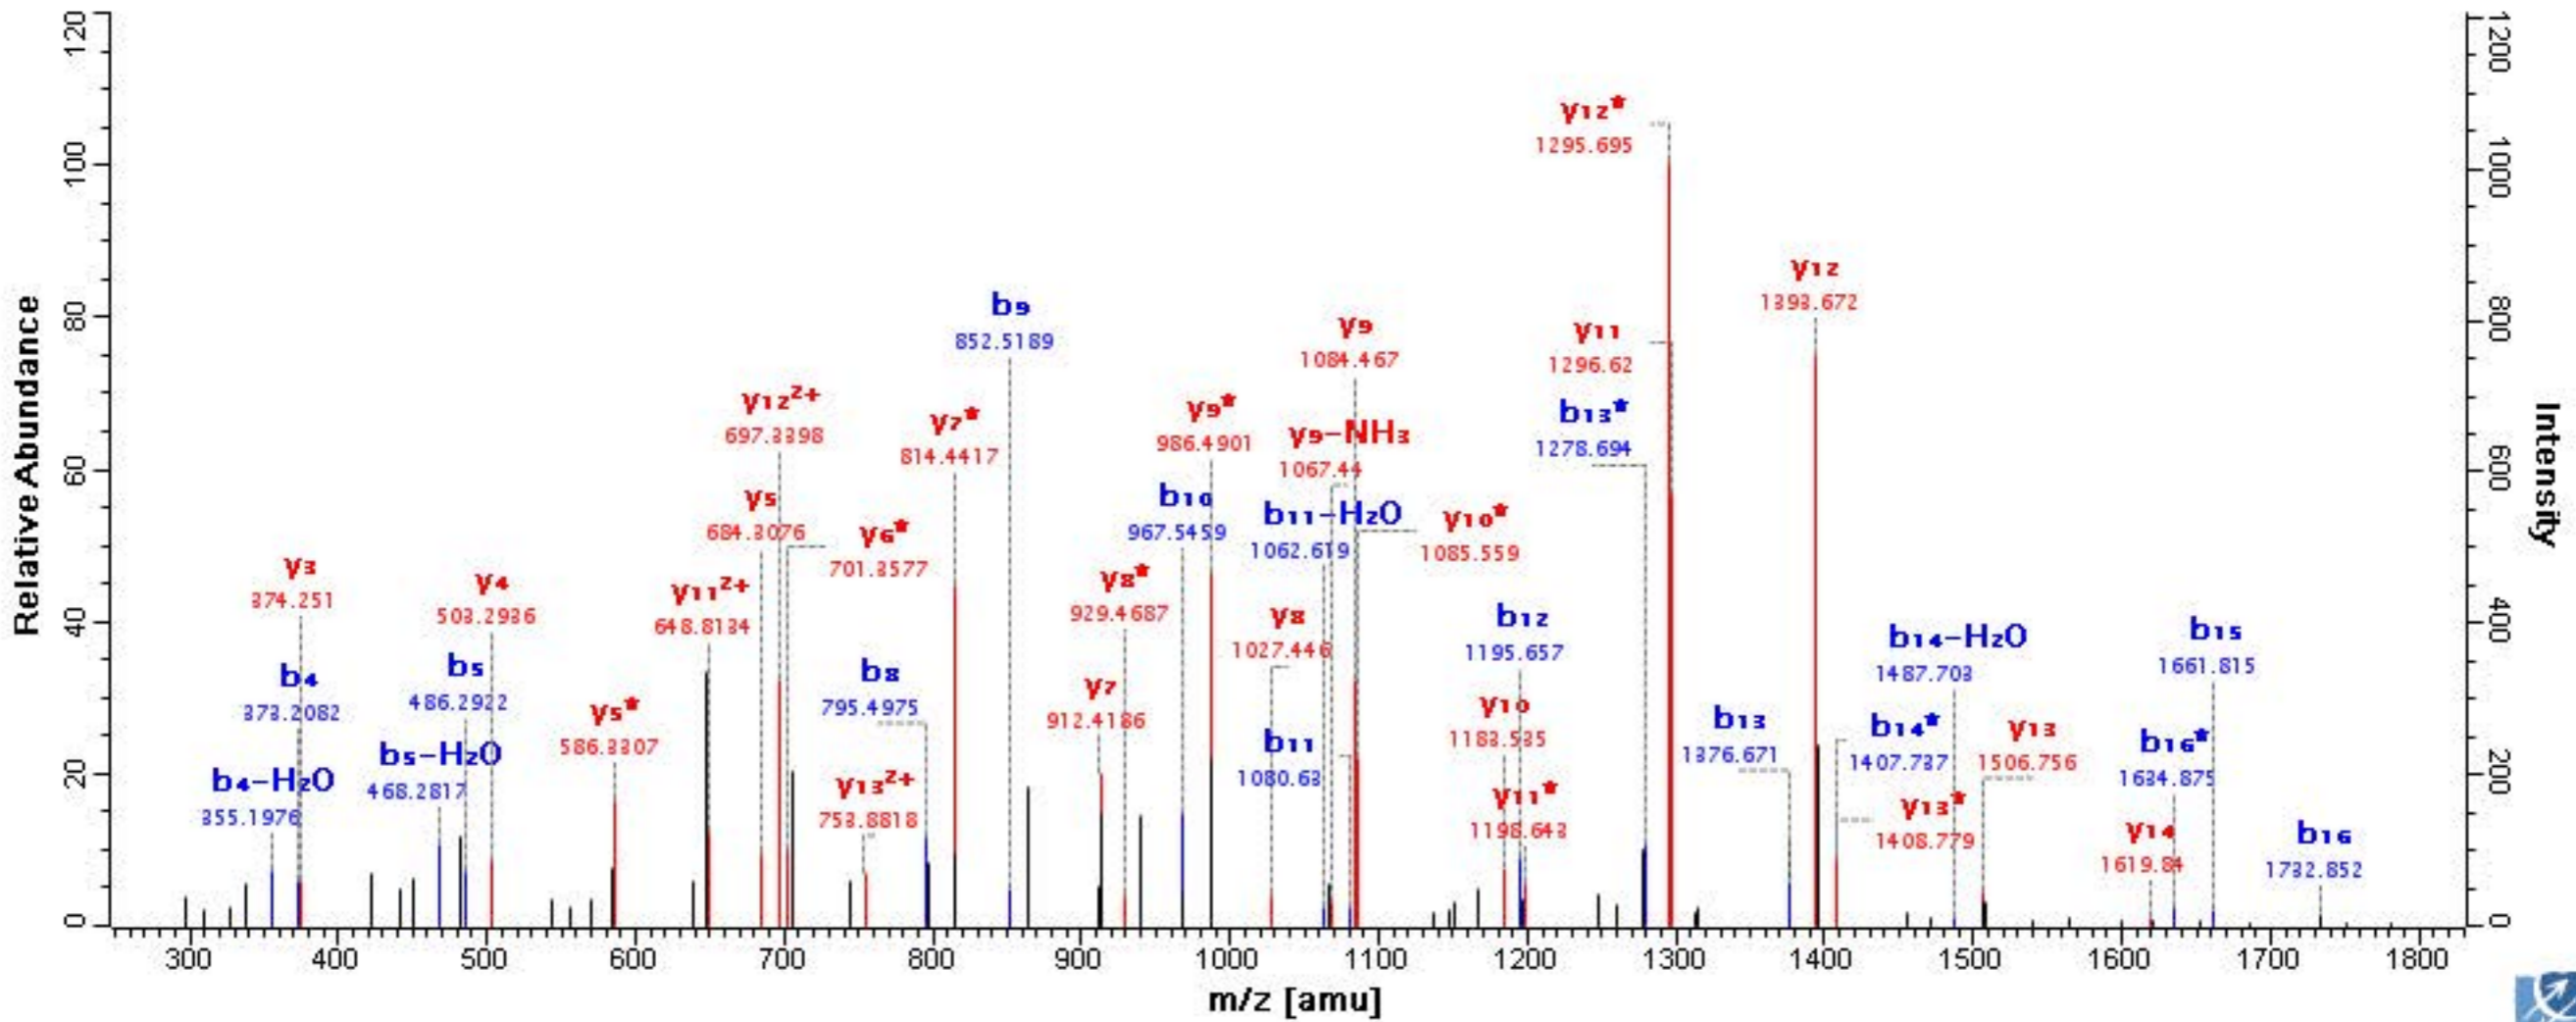

**precursor information**

|                   |                     |
|-------------------|---------------------|
| Mass:             | 1877.94945          |
| m/z:              | System.Collections. |
| Charge:           | System.Collections. |
| Retentiontime:    | System.Collections. |
| Score:            | 237.4024            |
| Mass Error [ppm]: | -0.27071            |
| PEP:              | 9.6593E-103         |
| Precursor Type:   | MULTI               |

| b ion      |              |    |     |    | γ ion        |            | γ <sup>2+</sup> ion |            |
|------------|--------------|----|-----|----|--------------|------------|---------------------|------------|
| Δ dalton   | mass         |    | seq |    | Δ dalton     | mass       | Δ dalton            | mass       |
|            | 88.039304876 | 1  | S   | 16 |              |            |                     |            |
|            | 189.08698335 | 2  | T   | 15 | 1791.9252067 |            | 1791.9252067        |            |
|            | 260.12409714 | 3  | A   | 14 | 1690.8775282 |            | 1690.8775282        |            |
| +0.173156  | 373.20816112 | 4  | I   | 13 | 1619.8404144 | -0.0312103 | 1619.8404144        |            |
| +0.0420034 | 486.2922251  | 5  | I   | 12 | 1506.7563505 | -0.2796659 | 753.88181346        | +0.257835  |
|            | 583.34498895 | 6  | P   | 11 | 1393.6722865 | +0.1057897 | 697.33978147        | +0.1528943 |
|            | 696.42905293 | 7  | I   | 10 | 1296.6195226 | +0.1900477 | 648.81339955        | +0.3740394 |
| +0.069916  | 795.49746685 | 8  | V   | 9  | 1183.5354586 | +0.1156644 | 1183.5354586        |            |
| +0.0491847 | 852.51893057 | 9  | G   | 8  | 1084.4670447 | +0.0657922 | 1084.4670447        |            |
| +0.3138066 | 967.5458736  | 10 | D   | 7  | 1027.445581  | +0.182837  | 1027.445581         |            |
| +0.2509218 | 1080.6299376 | 11 | I   | 6  | 912.41863798 | +0.1927512 | 912.41863798        |            |
| +0.0604045 | 1195.6568806 | 12 | D   | 5  | 799.334574   |            | 799.334574          |            |
| -0.0379549 | 1376.6708895 | 13 | T   | 4  | 684.30763097 | +0.0090805 | 684.30763097        |            |
|            | 1505.7134826 | 14 | E   | 3  | 503.29362208 | +0.0897397 | 503.29362208        |            |
| +0.0987365 | 1661.8145936 | 15 | R   | 2  | 374.25102899 | +0.2017298 | 374.25102899        |            |
| +0.1856461 | 1732.8517074 | 16 | A   | 1  | 218.14991796 |            | 218.14991796        |            |
|            |              | 17 | K   | 0  | 147.11280417 |            | 147.11280417        |            |

**general information**

|                       |             |
|-----------------------|-------------|
| Annotation:           | 13 of 17    |
| AminoAcids Coverag    | 76 %        |
| Intensity Coverage:   | 67 %        |
| Protein Localisation: | 174 ... 190 |

Source: 20130121\_VR\_Bsu\_TripleSILAC\_pWTPPrkCPrpCReplicate2\_F04  
 Scannumber: 3635  
 Protein: BSU35800; gerBA  
 Peptide Score: 66.27  
 Method: ITMS; CID; 3

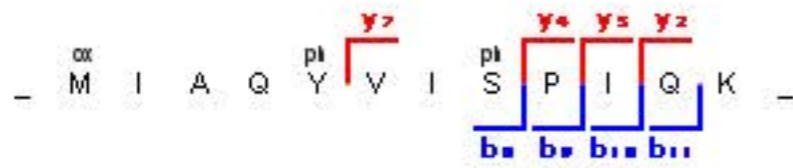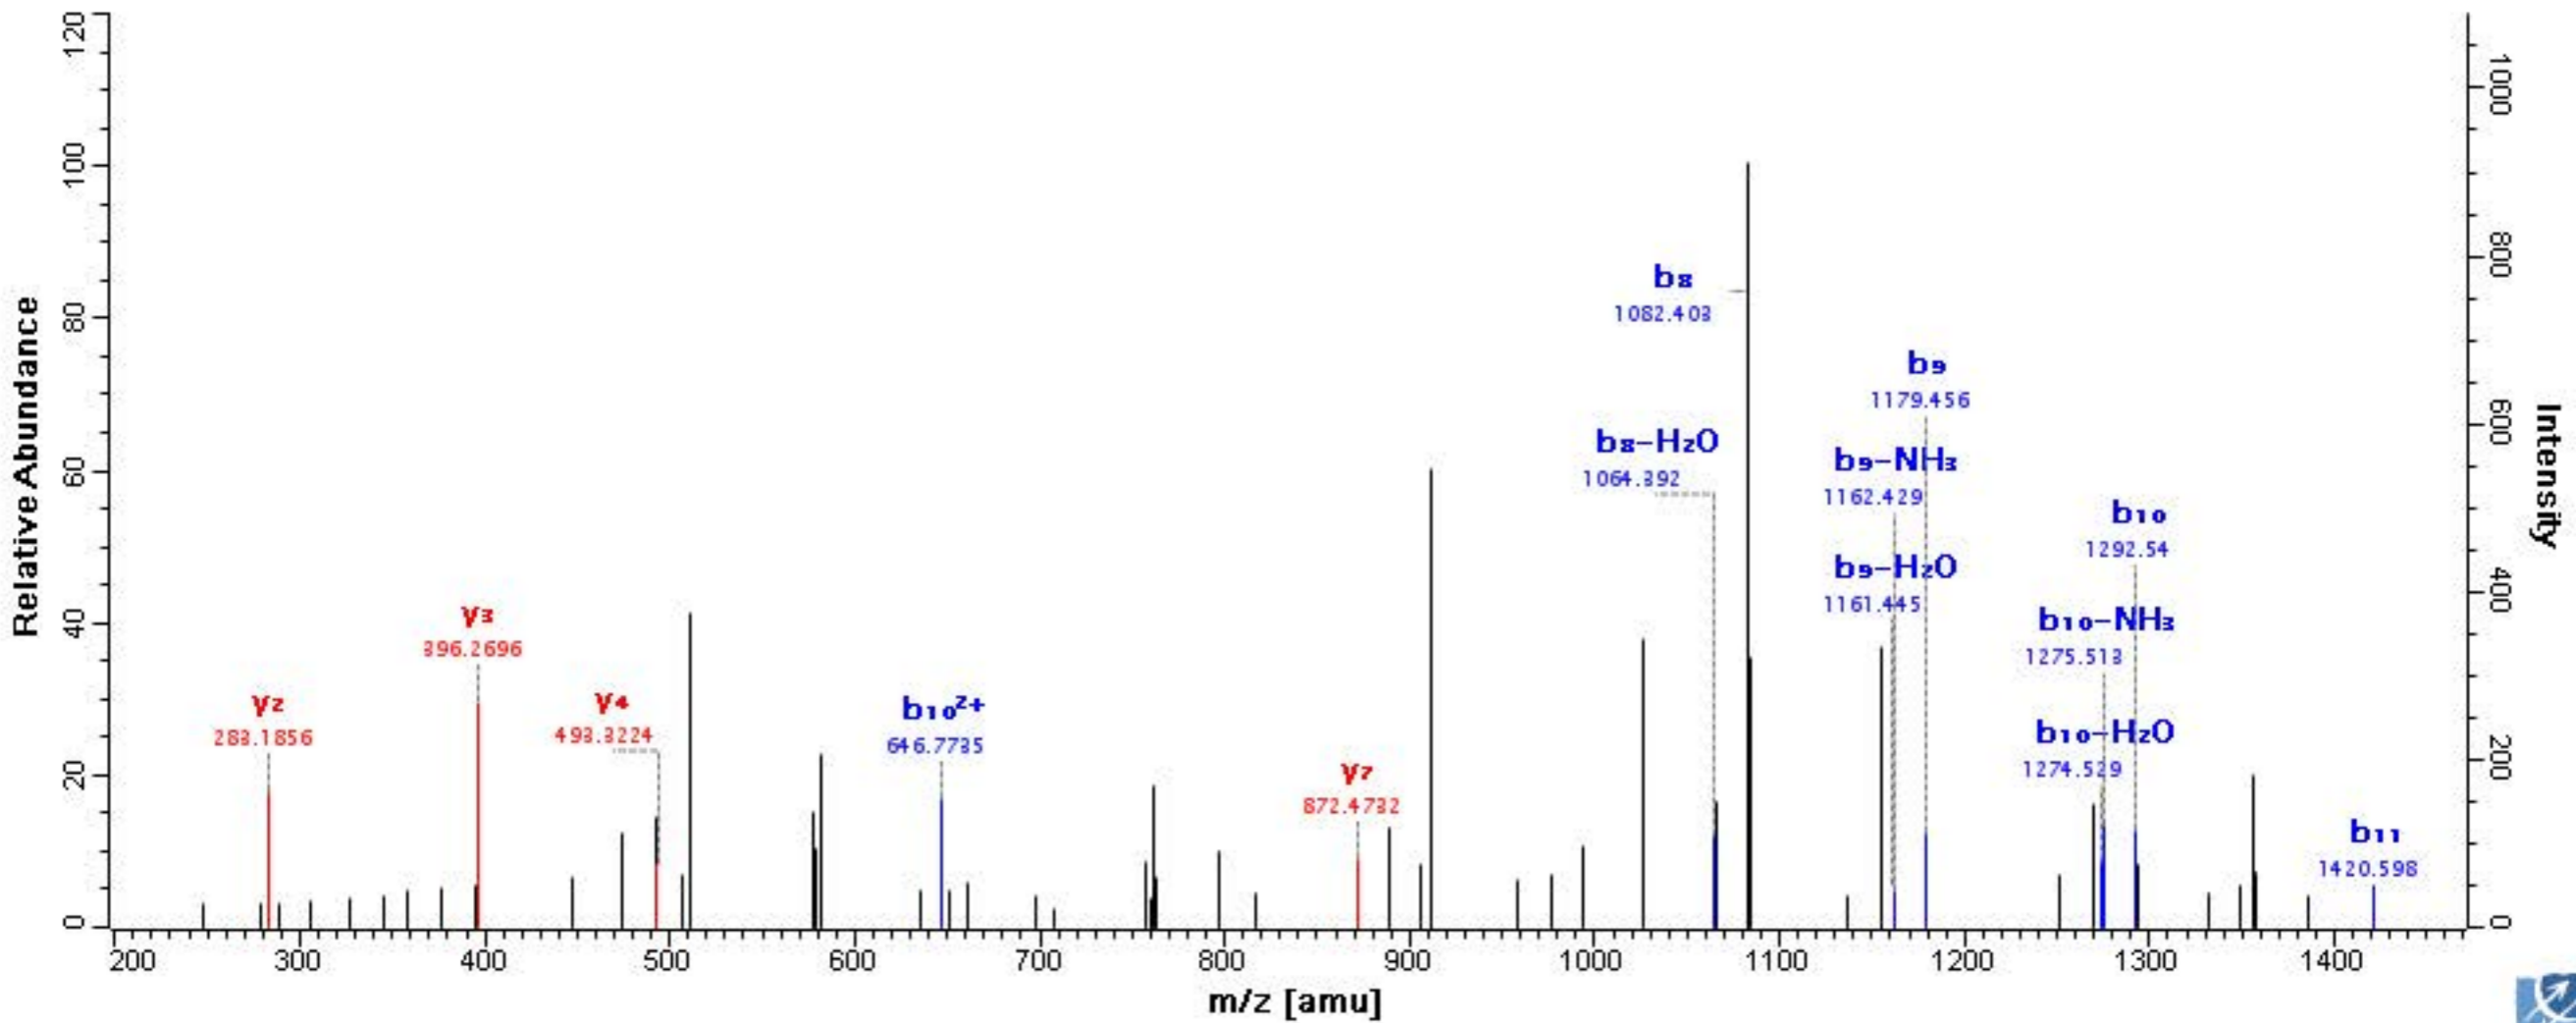

#### precursor information

|                   |                     |
|-------------------|---------------------|
| Mass:             | 1565.69608          |
| m/z:              | System.Collections. |
| Charge:           | System.Collections. |
| Retentiontime:    | System.Collections. |
| Score:            | 66.26665            |
| Mass Error [ppm]: | -0.32142            |
| PEP:              | 0.036805            |
| Precursor Type:   | MULTI               |

#### general information

|                       |           |
|-----------------------|-----------|
| Annotation:           | 5 of 12   |
| AminoAcids Coverag    | 42 %      |
| Intensity Coverage:   | 21 %      |
| Protein Localisation: | 51 ... 62 |

| b <sup>2+</sup> ion |              | b ion           |              |     | y ion |                 |              |            |
|---------------------|--------------|-----------------|--------------|-----|-------|-----------------|--------------|------------|
| $\Delta$ dalton     | mass         | $\Delta$ dalton | mass         | seq |       | $\Delta$ dalton | mass         |            |
|                     | 148.04267569 |                 | 148.04267569 | 1   | M     | 11              |              |            |
|                     | 261.12673968 |                 | 261.12673968 | 2   | I     | 10              | 1427.6826593 |            |
|                     | 332.16385346 |                 | 332.16385346 | 3   | A     | 9               | 1314.5985953 |            |
|                     | 460.22243097 |                 | 460.22243097 | 4   | Q     | 8               | 1243.5614815 |            |
|                     | 703.25208992 |                 | 703.25208992 | 5   | Y     | 7               | 1115.502904  |            |
|                     | 802.32050384 |                 | 802.32050384 | 6   | V     | 6               | 872.47324504 | -0.0483183 |
|                     | 915.40456782 |                 | 915.40456782 | 7   | I     | 5               | 773.40483113 |            |
|                     | 1082.4029266 | +0.4841583      | 1082.4029266 | 8   | S     | 4               | 660.32076715 |            |
|                     | 1179.4556905 | +0.0306376      | 1179.4556905 | 9   | P     | 3               | 493.32240833 | -0.0630089 |
| -0.3319261          | 646.77351547 | +0.1854653      | 1292.5397545 | 10  | I     | 2               | 396.26964448 | +0.1129239 |
|                     | 1420.598332  | +0.1517901      | 1420.598332  | 11  | Q     | 1               | 283.1855805  | +0.0859649 |
|                     |              |                 |              | 12  | K     | 0               | 155.12700298 |            |

Source: 20130121\_VR\_Bsu\_TripleSILAC\_pWTPPrkCPrpCReplicate2\_F04  
 Scannumber: 9018  
 Protein: BSU03480; srfA; srfA1; srfAA  
 Peptide Score: 53.08  
 Method: ITMS; CID; 3

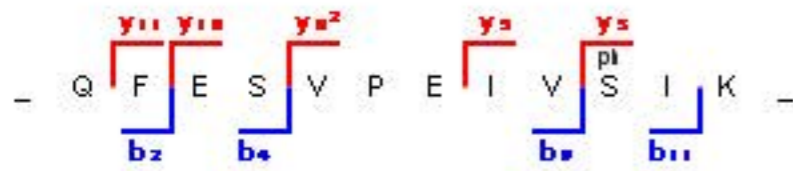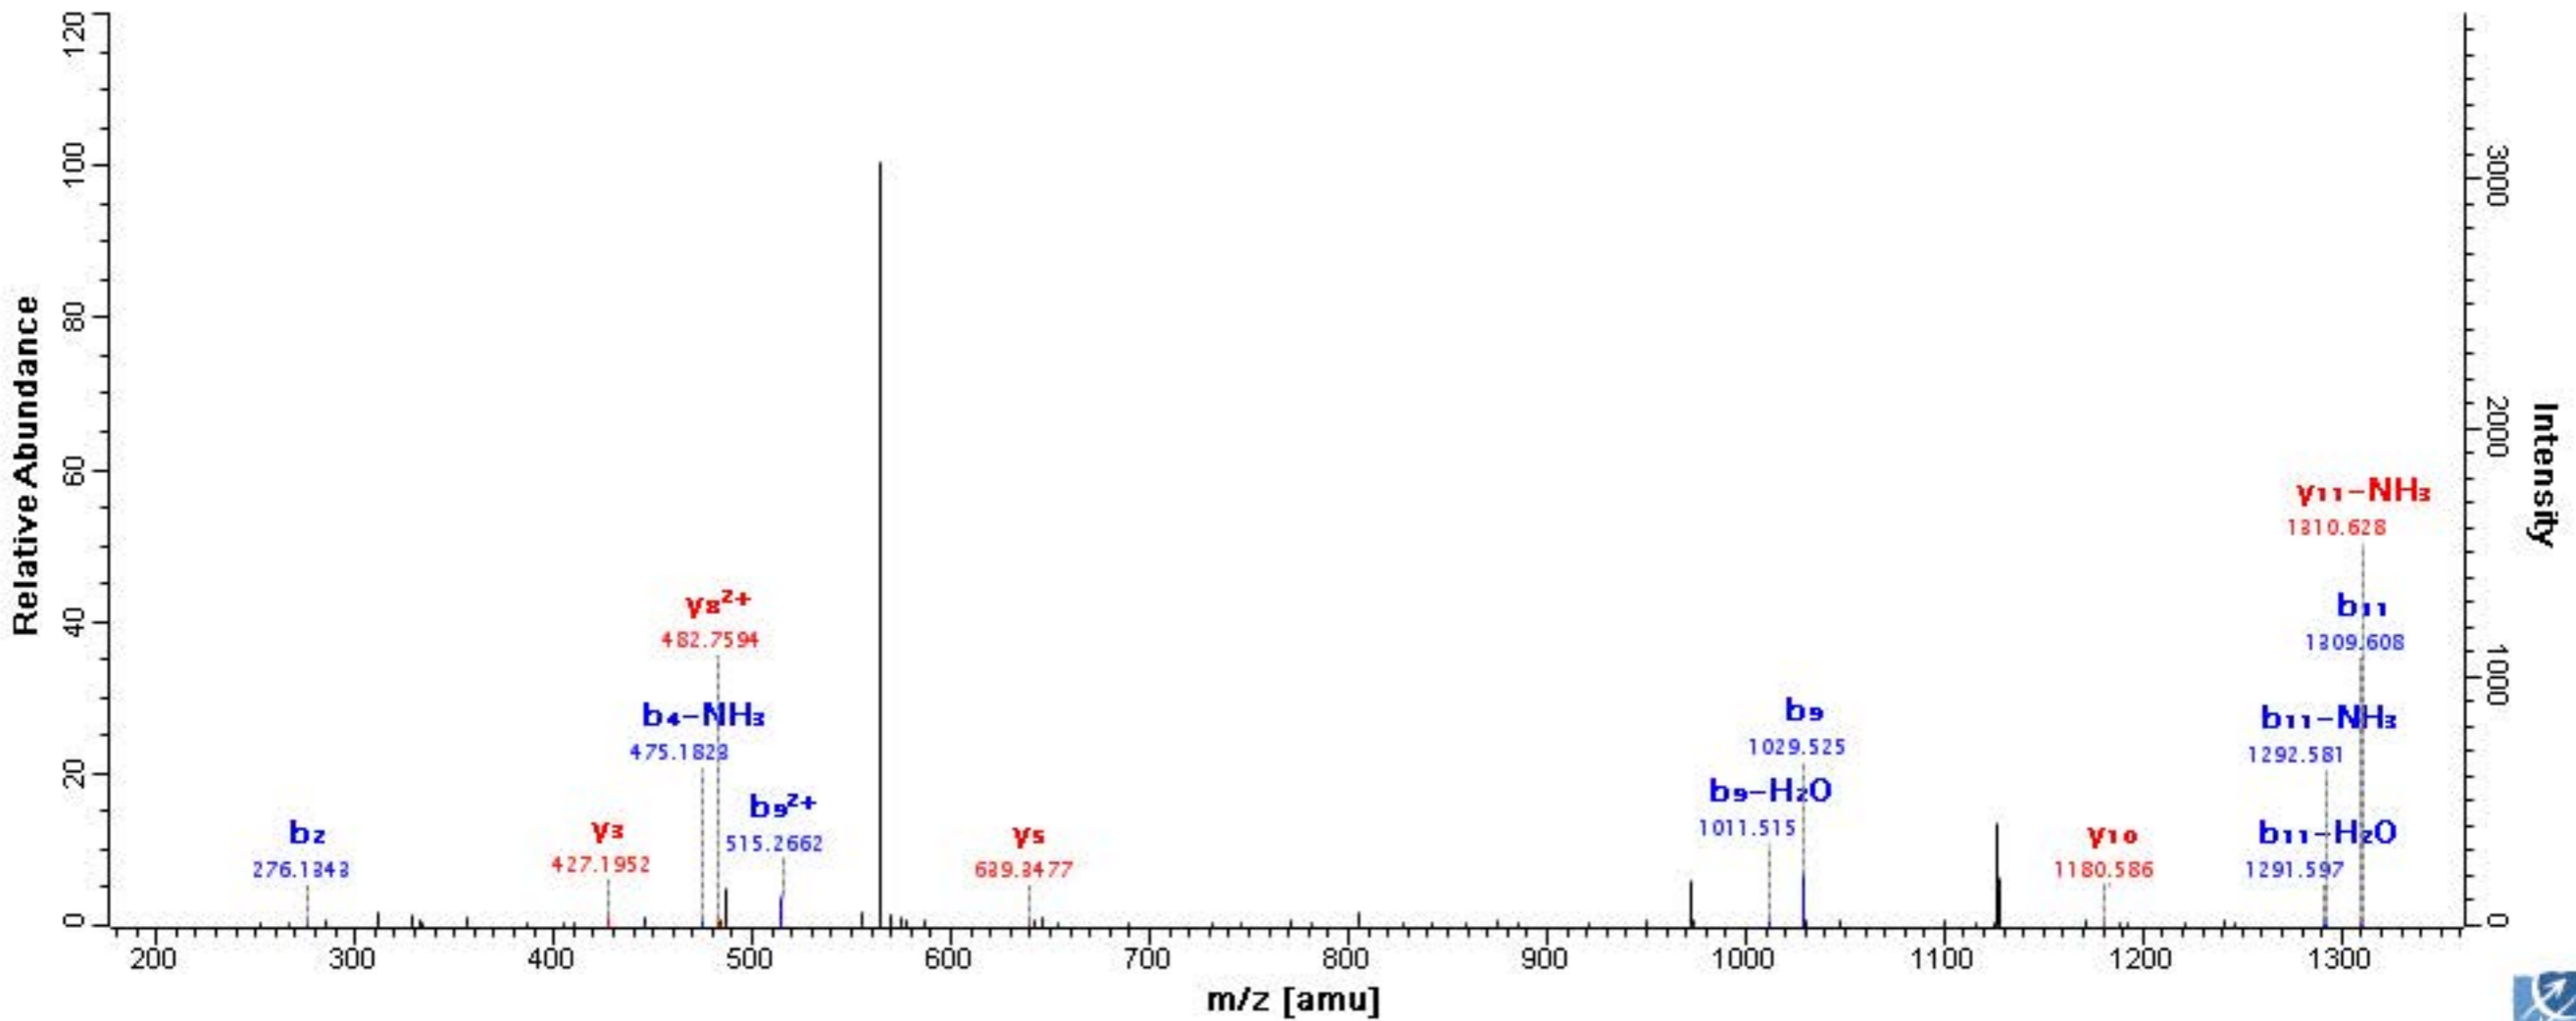

#### precursor information

|                   |                     |
|-------------------|---------------------|
| Mass:             | 1454.70562          |
| m/z:              | System.Collections. |
| Charge:           | System.Collections. |
| Retentiontime:    | System.Collections. |
| Score:            | 53.08014            |
| Mass Error [ppm]: | -0.12942            |
| PEP:              | 0.070012            |
| Precursor Type:   | MULTI               |

#### general information

|                       |             |
|-----------------------|-------------|
| Annotation:           | 8 of 12     |
| AminoAcids Coverag    | 67 %        |
| Intensity Coverage:   | 9 %         |
| Protein Localisation: | 202 ... 213 |

| b <sup>2+</sup> ion |          | b ion     |          |    |     |    | γ ion    |           | γ <sup>2+</sup> ion |           |
|---------------------|----------|-----------|----------|----|-----|----|----------|-----------|---------------------|-----------|
| Δ dalton            | mass     | Δ dalton  | mass     |    | seq |    | Δ dalton | mass      | Δ dalton            | mass      |
|                     | 129.0659 |           | 129.0659 | 1  | Q   | 11 |          |           |                     |           |
|                     | 276.1343 | -0.220816 | 276.1343 | 2  | F   | 10 | 1327.655 |           | 1327.655            |           |
|                     | 405.1769 |           | 405.1769 | 3  | E   | 9  | 1180.586 | -0.106483 | 1180.586            |           |
|                     | 492.2089 |           | 492.2089 | 4  | S   | 8  | 1051.544 |           | 1051.544            |           |
|                     | 591.2773 |           | 591.2773 | 5  | V   | 7  | 964.5115 |           | 482.7594            | -0.310096 |
|                     | 688.3301 |           | 688.3301 | 6  | P   | 6  | 865.4431 |           | 865.4431            |           |
|                     | 817.3727 |           | 817.3727 | 7  | E   | 5  | 768.3903 |           | 768.3903            |           |
|                     | 930.4567 |           | 930.4567 | 8  | I   | 4  | 639.3477 | -0.106982 | 639.3477            |           |
| -0.254794           | 515.2662 | +0.097665 | 1029.525 | 9  | V   | 3  | 526.2636 |           | 526.2636            |           |
|                     | 1196.523 |           | 1196.523 | 10 | S   | 2  | 427.1952 | -0.185767 | 427.1952            |           |
|                     | 1309.608 | +0.116926 | 1309.608 | 11 | I   | 1  | 260.1969 |           | 260.1969            |           |
|                     |          |           |          | 12 | K   | 0  | 147.1128 |           | 147.1128            |           |

Source: 20130121\_VR\_Bsu\_TripleSILAC\_pWTPPrkCPrpCReplicate2\_F05  
 Scannumber: 2540  
 Protein: BSU05740; phoAIII; phoB  
 Peptide Score: 87.15  
 Method: ITMS; CID; 3

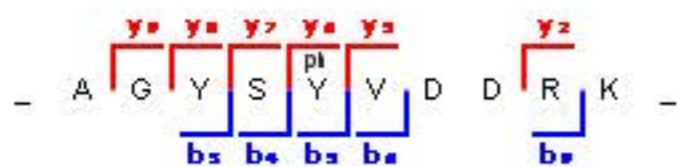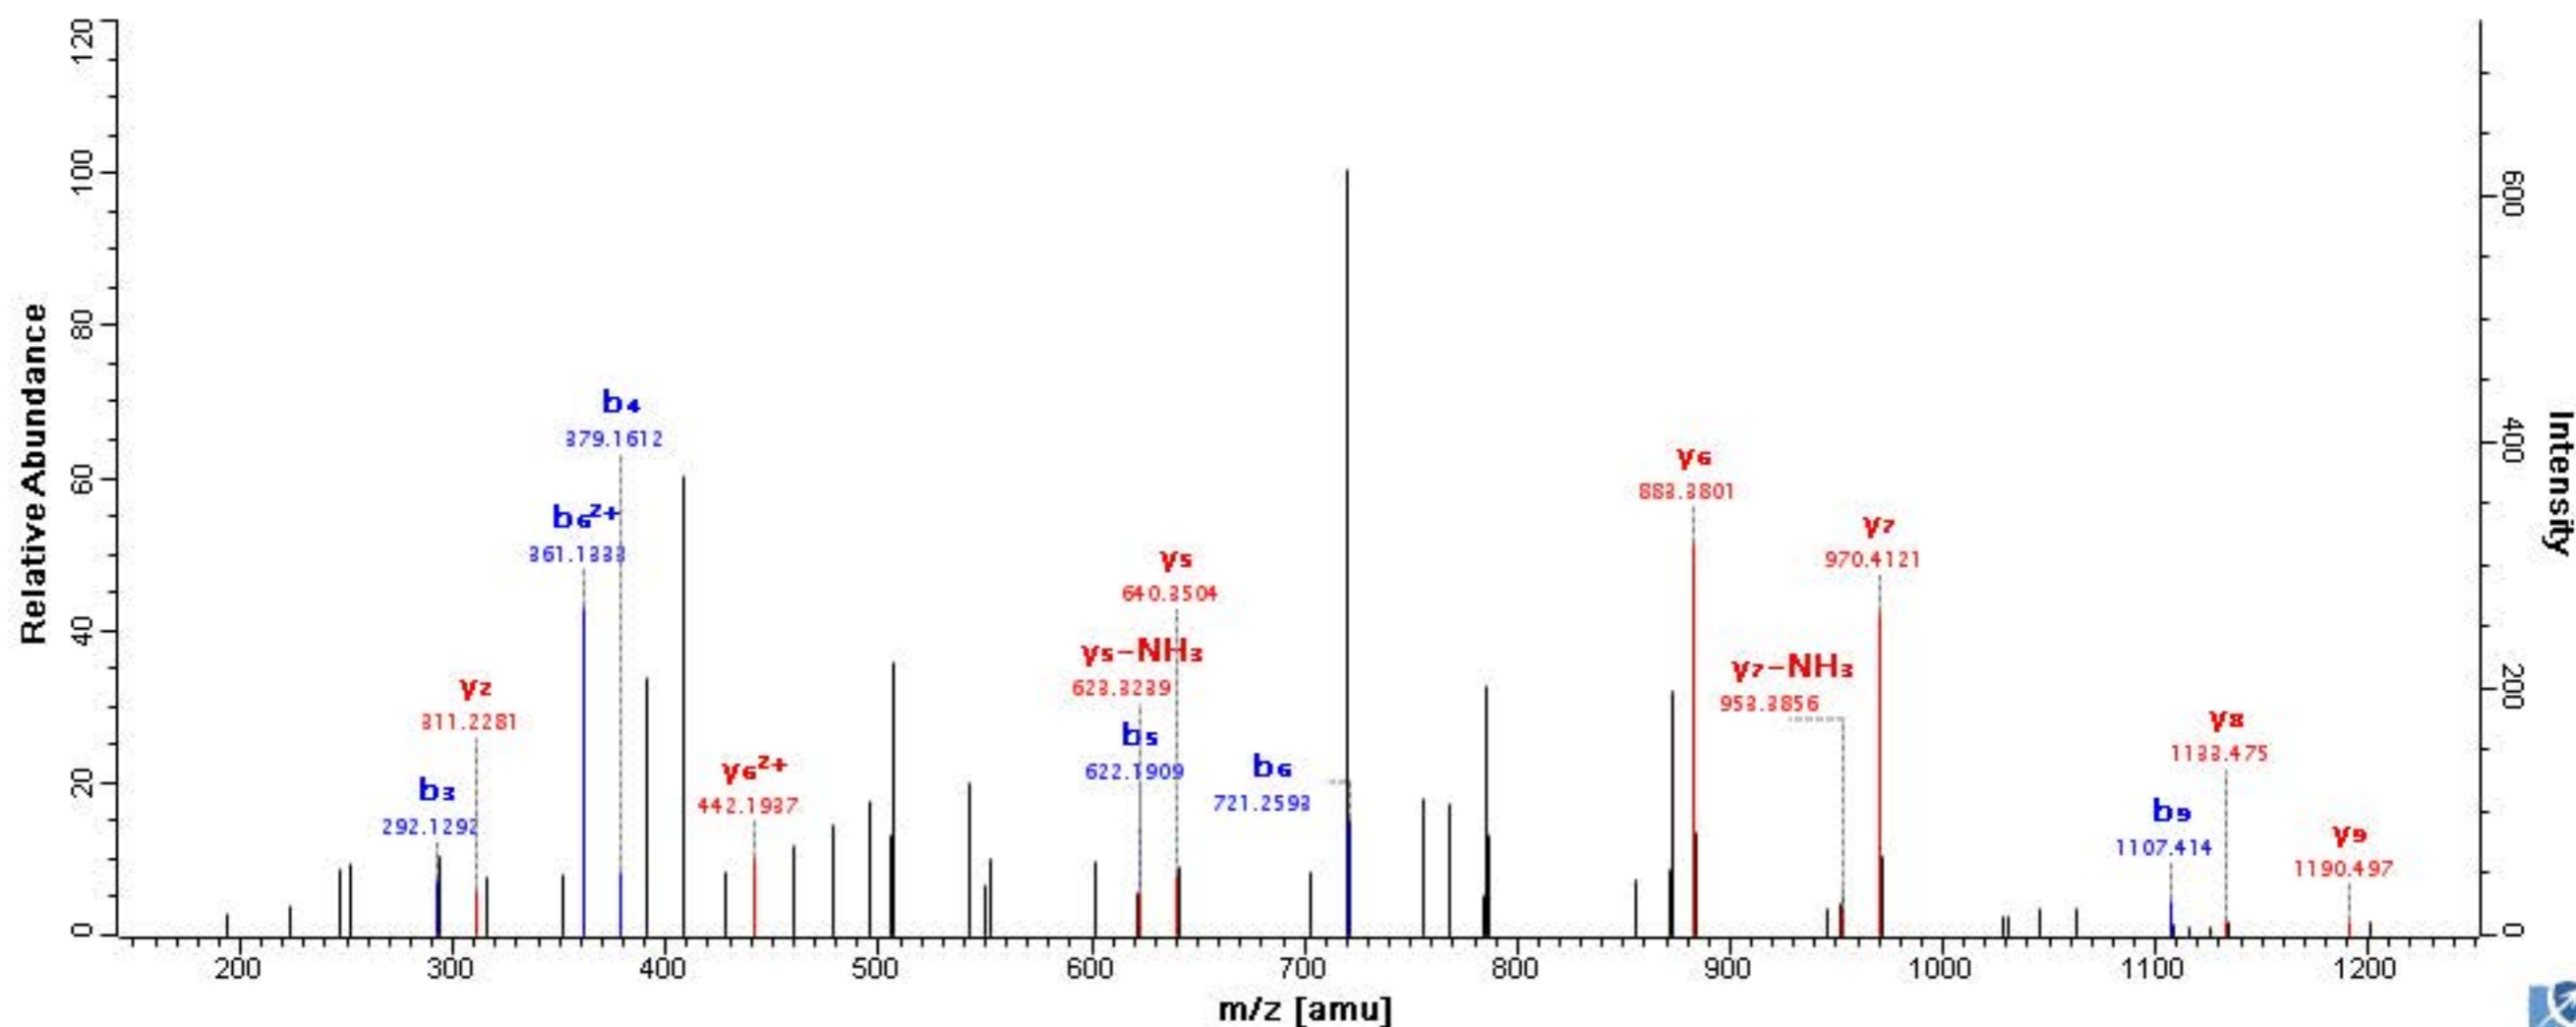

**precursor information**

|                   |                     |
|-------------------|---------------------|
| Mass:             | 1260.527            |
| m/z:              | System.Collections. |
| Charge:           | System.Collections. |
| Retentiontime:    | System.Collections. |
| Score:            | 87.14896            |
| Mass Error [ppm]: | 0.21448             |
| PEP:              | 0.054988            |
| Precursor Type:   | ISO                 |

**general information**

|                       |             |
|-----------------------|-------------|
| Annotation:           | 6 of 10     |
| AminoAcids Coverage:  | 60 %        |
| Intensity Coverage:   | 27 %        |
| Protein Localisation: | 211 ... 220 |

| b <sup>2+</sup> ion |          | b ion     |          |     | γ ion |          | γ <sup>2+</sup> ion |          |           |
|---------------------|----------|-----------|----------|-----|-------|----------|---------------------|----------|-----------|
| Δ dalton            | mass     | Δ dalton  | mass     | seq |       | Δ dalton | mass                | Δ dalton | mass      |
|                     | 72.04439 |           | 72.04439 | 1   | A     |          |                     |          |           |
|                     | 129.0659 |           | 129.0659 | 2   | G     | 1190.497 | +0.027887           | 1190.497 |           |
|                     | 292.1292 | -0.063326 | 292.1292 | 3   | Y     | 1133.475 | +0.072055           | 1133.475 |           |
|                     | 379.1612 | +0.145308 | 379.1612 | 4   | S     | 970.4121 | +0.162117           | 970.4121 |           |
|                     | 622.1909 | +0.312121 | 622.1909 | 5   | Y     | 883.3801 | +0.045769           | 442.1937 | -0.135386 |
| +0.004842           | 361.1333 | +0.298822 | 721.2593 | 6   | V     | 640.3504 | +0.136647           | 640.3504 |           |
|                     | 836.2862 |           | 836.2862 | 7   | D     | 541.282  |                     | 541.282  |           |
|                     | 951.3132 |           | 951.3132 | 8   | D     | 426.2551 |                     | 426.2551 |           |
|                     | 1107.414 | -0.010472 | 1107.414 | 9   | R     | 311.2281 | +0.033361           | 311.2281 |           |
|                     |          |           |          | 10  | K     | 155.127  |                     | 155.127  |           |

Source: 20130121\_VR\_Bsu\_TripleSILAC\_pWTPPrkCPrpCReplicate2\_F05  
 Scannumber: 5937  
 Protein: BSU18000; citB  
 Peptide Score: 148.96  
 Method: ITMS; CID; 3

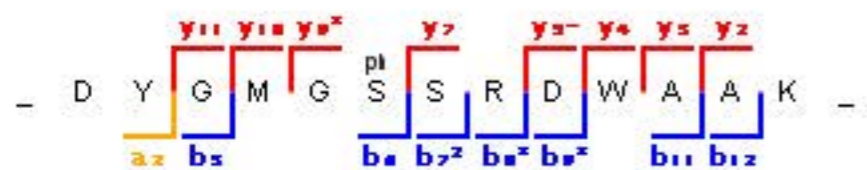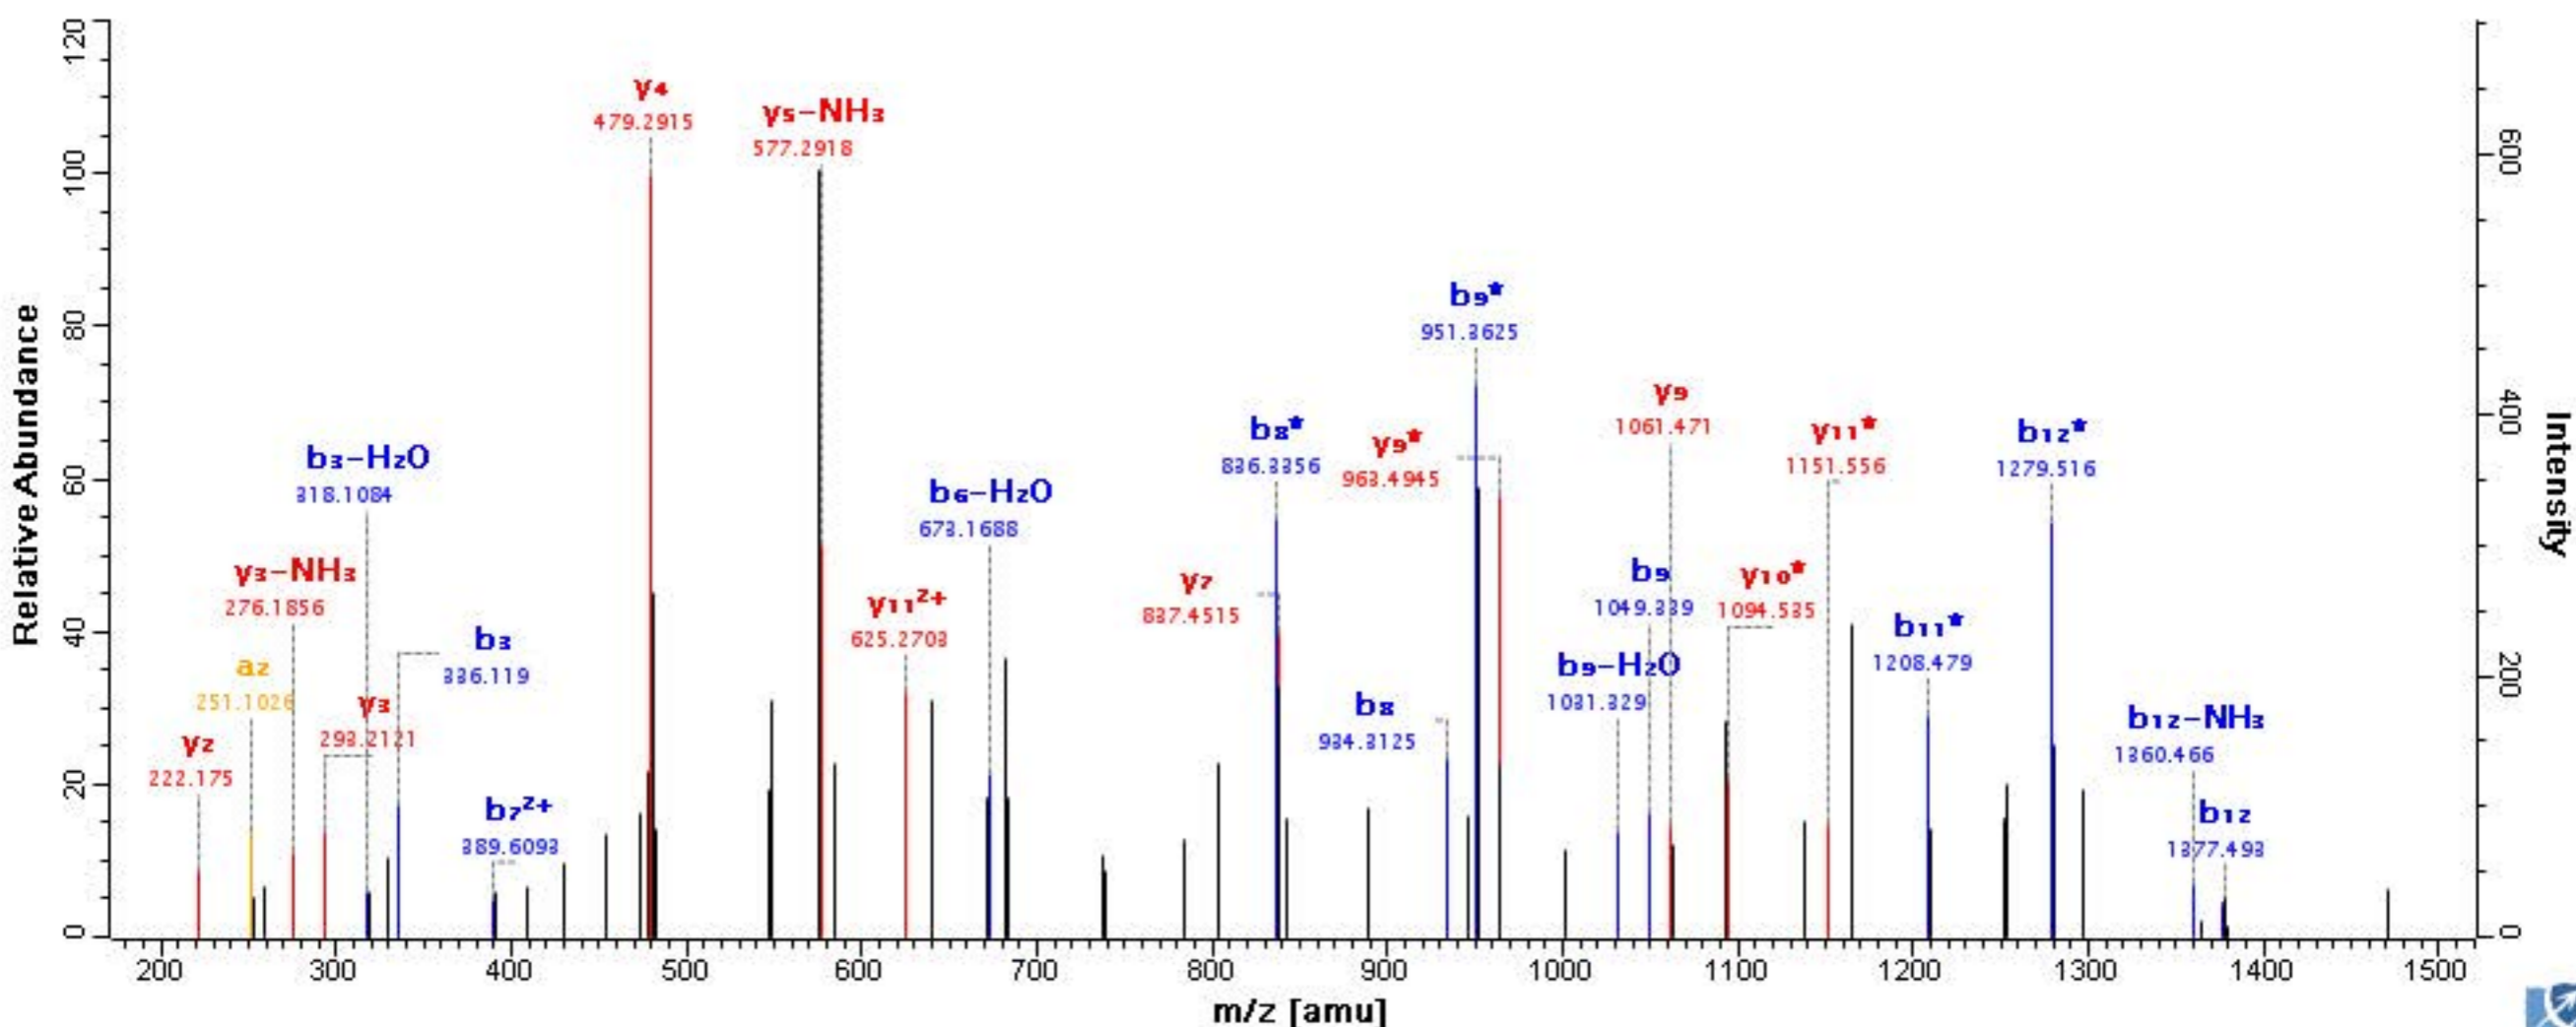

#### precursor information

|                   |                     |
|-------------------|---------------------|
| Mass:             | 1522.59203          |
| m/z:              | System.Collections. |
| Charge:           | System.Collections. |
| Retentiontime:    | System.Collections. |
| Score:            | 148.9585            |
| Mass Error [ppm]: | 0.54787             |
| PEP:              | 2.6382E-19          |
| Precursor Type:   | MULTI               |

#### general information

|                       |             |
|-----------------------|-------------|
| Annotation:           | 11 of 13    |
| AminoAcids Coverage:  | 85 %        |
| Intensity Coverage:   | 44 %        |
| Protein Localisation: | 787 ... 799 |

| a ion    |         | b <sup>2+</sup> ion |         | b ion    |         |     |   | y ion    |          | y <sup>2+</sup> ion |         |
|----------|---------|---------------------|---------|----------|---------|-----|---|----------|----------|---------------------|---------|
| Δ dalton | mass    | Δ dalton            | mass    | Δ dalton | mass    | seq |   | Δ dalton | mass     | Δ dalton            | mass    |
|          | 88.0393 |                     | 116.034 |          | 116.034 | 1   | D |          |          |                     |         |
| -0.13    | 251.103 |                     | 279.098 |          | 279.098 | 2   | Y | 1412.6   |          | 1412.6              |         |
|          | 308.124 |                     | 336.119 | +0.16206 | 336.119 | 3   | G | 1249.53  |          | 625.27              | +0.3171 |
|          | 439.165 |                     | 467.159 |          | 467.159 | 4   | M | 1192.51  |          | 1192.51             |         |
|          | 496.186 |                     | 524.181 |          | 524.181 | 5   | G | 1061.47  | +0.03816 | 1061.47             |         |
|          | 663.184 |                     | 691.179 |          | 691.179 | 6   | S | 1004.45  |          | 1004.45             |         |
|          | 750.216 | -0.2533             | 389.609 |          | 778.211 | 7   | S | 837.452  | -0.0097  | 837.452             |         |
|          | 906.318 |                     | 934.312 | +0.13426 | 934.312 | 8   | R | 750.42   |          | 750.42              |         |
|          | 1021.34 |                     | 1049.34 | +0.15742 | 1049.34 | 9   | D | 594.318  |          | 594.318             |         |
|          | 1207.42 |                     | 1235.42 |          | 1235.42 | 10  | W | 479.291  | +0.06634 | 479.291             |         |
|          | 1278.46 |                     | 1306.46 |          | 1306.46 | 11  | A | 293.212  | +0.10592 | 293.212             |         |
|          | 1349.5  |                     | 1377.49 | -0.2101  | 1377.49 | 12  | A | 222.175  | -0.0942  | 222.175             |         |
|          |         |                     |         |          |         | 13  | K | 151.138  |          | 151.138             |         |



Source: 20130121\_VR\_Bsu\_TripleSILAC\_pWTPPrkCPrpCReplicate2\_F05  
 Scannumber: 6902  
 Protein: aroA; BSU29750  
 Peptide Score: 113.61  
 Method: ITMS; CID; 3

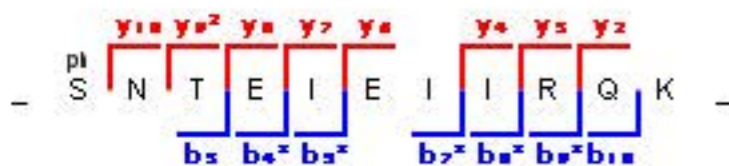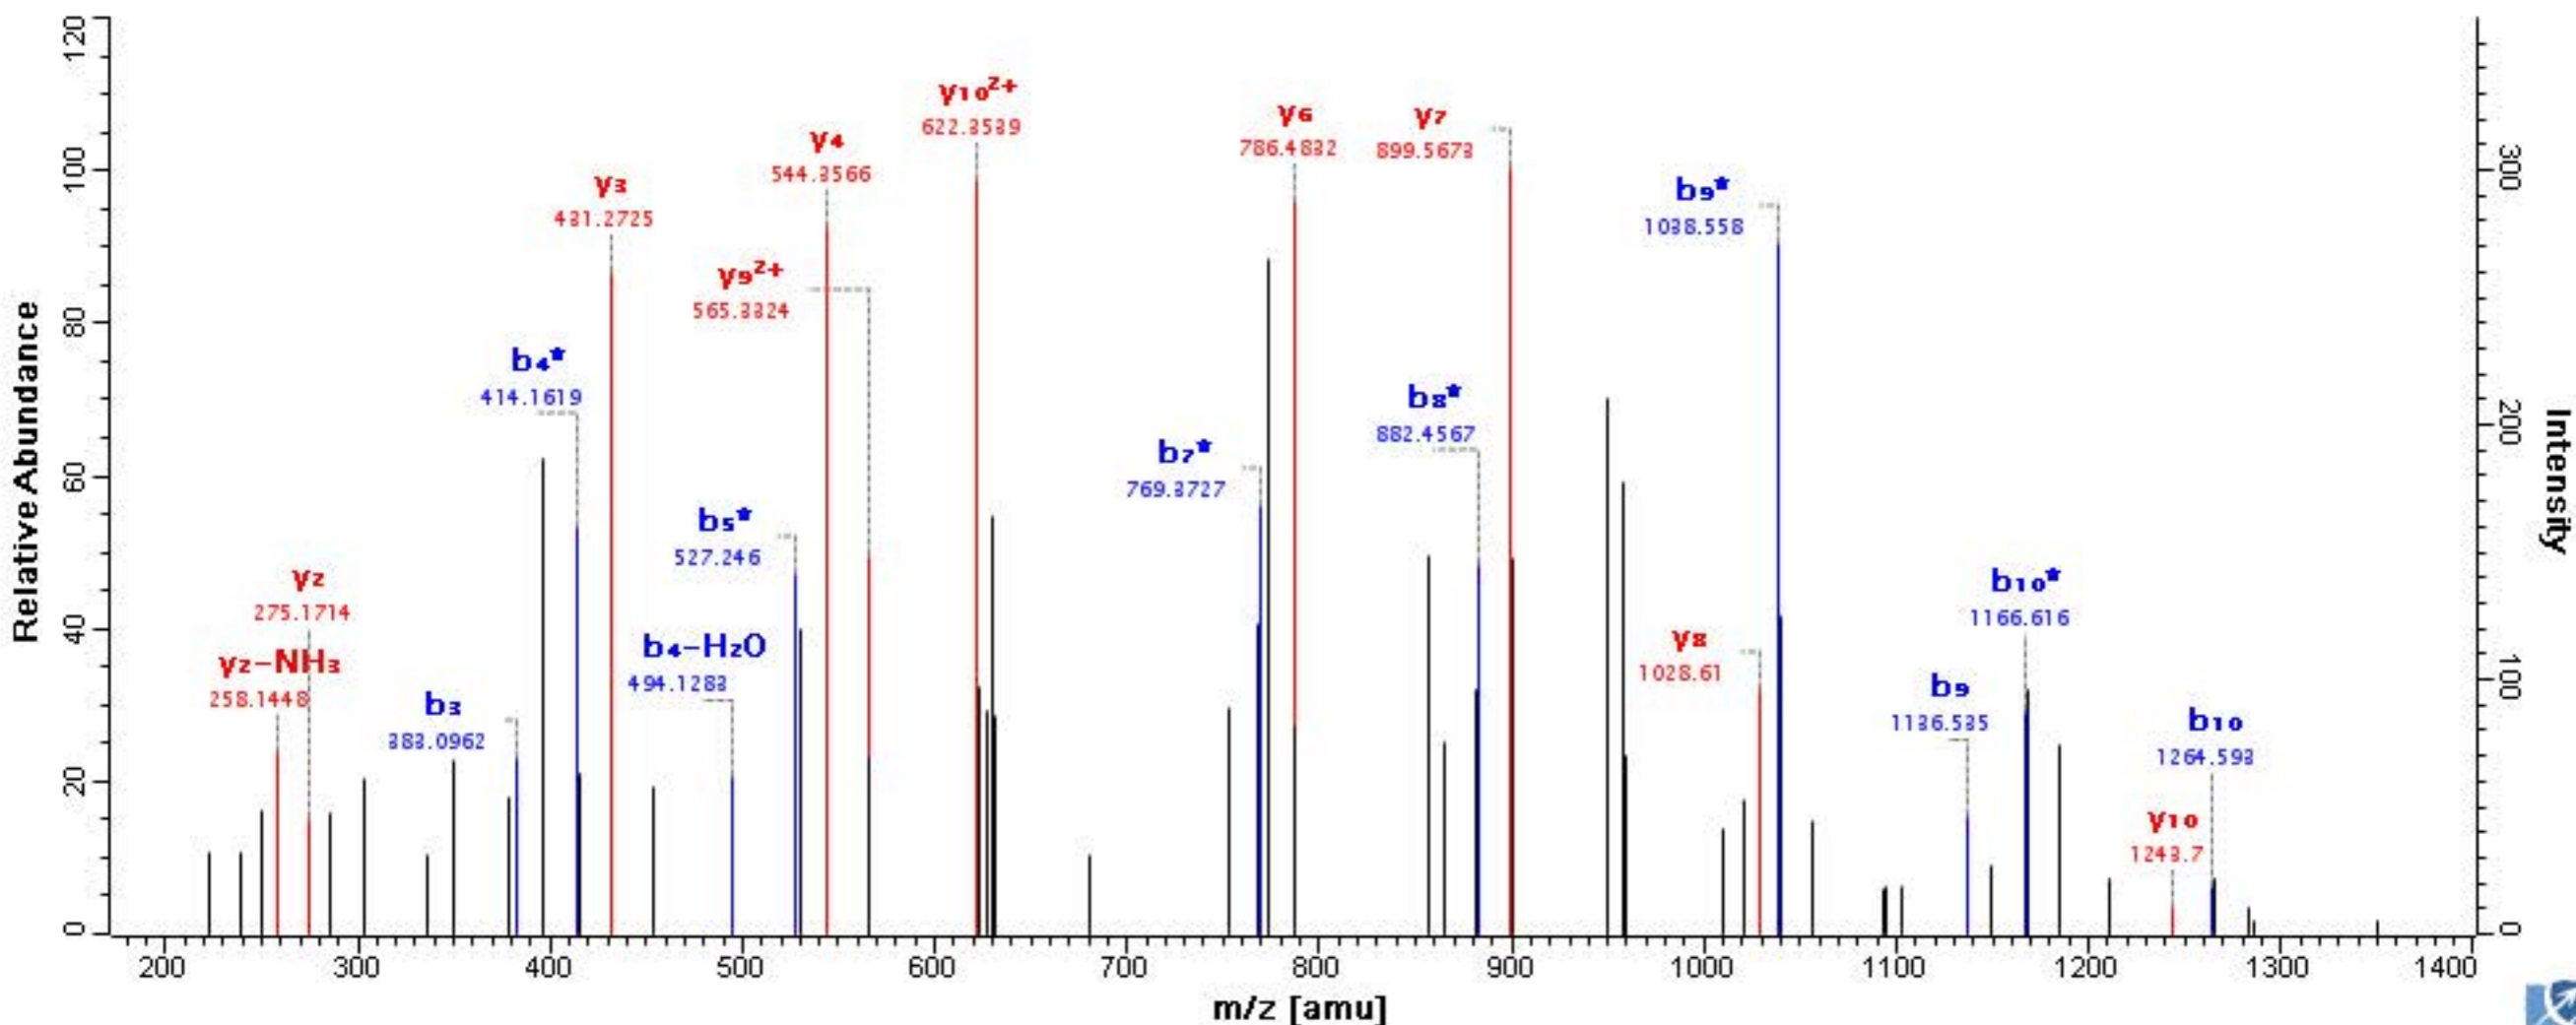

**precursor information**

|                   |                     |
|-------------------|---------------------|
| Mass:             | 1409.69154          |
| m/z:              | System.Collections. |
| Charge:           | System.Collections. |
| Retentiontime:    | System.Collections. |
| Score:            | 113.609             |
| Mass Error [ppm]: | -0.011434           |
| PEP:              | 1.8025E-06          |
| Precursor Type:   | MULTI               |

**general information**

|                       |          |
|-----------------------|----------|
| Annotation:           | 9 of 11  |
| AminoAcids Coverage:  | 82 %     |
| Intensity Coverage:   | 45 %     |
| Protein Localisation: | 2 ... 12 |

| b ion      |              |    |     |    | gamma ion    |            | gamma <sup>2+</sup> ion |            |
|------------|--------------|----|-----|----|--------------|------------|-------------------------|------------|
| Δ dalton   | mass         |    | seq |    | Δ dalton     | mass       | Δ dalton                | mass       |
|            | 168.00563528 | 1  | S   | 10 |              |            |                         |            |
|            | 282.04856273 | 2  | N   | 9  | 1243.7004768 | +0.1934441 | 622.35387662            | -0.0414987 |
| +0.1173818 | 383.09624121 | 3  | T   | 8  | 1129.6575493 |            | 565.33241289            | -0.0137483 |
|            | 512.1388343  | 4  | E   | 7  | 1028.6098708 | +0.1198655 | 1028.6098708            |            |
|            | 625.22289828 | 5  | I   | 6  | 899.56727775 | -0.0524462 | 899.56727775            |            |
|            | 754.26549138 | 6  | E   | 5  | 786.48321377 | +0.0294815 | 786.48321377            |            |
|            | 867.34955536 | 7  | I   | 4  | 657.44062067 |            | 657.44062067            |            |
|            | 980.43361934 | 8  | I   | 3  | 544.35655669 | -0.1630142 | 544.35655669            |            |
| +0.0147081 | 1136.5347304 | 9  | R   | 2  | 431.27249271 | +0.1254565 | 431.27249271            |            |
| +0.0618435 | 1264.5933079 | 10 | Q   | 1  | 275.17138168 | -0.0934398 | 275.17138168            |            |
|            |              | 11 | K   | 0  | 147.11280417 |            | 147.11280417            |            |

Source: 20130121\_VR\_Bsu\_TripleSILAC\_pWTPPrkCPrpCReplicate2\_F05  
 Scannumber: 8397  
 Protein: BSU11690; thiG; yjbT  
 Peptide Score: 79.87  
 Method: ITMS; CID; 3

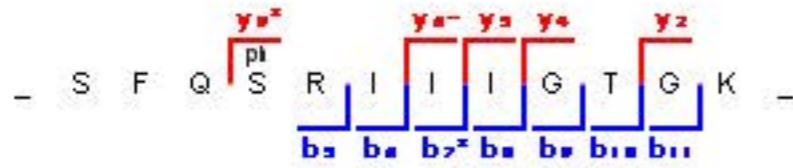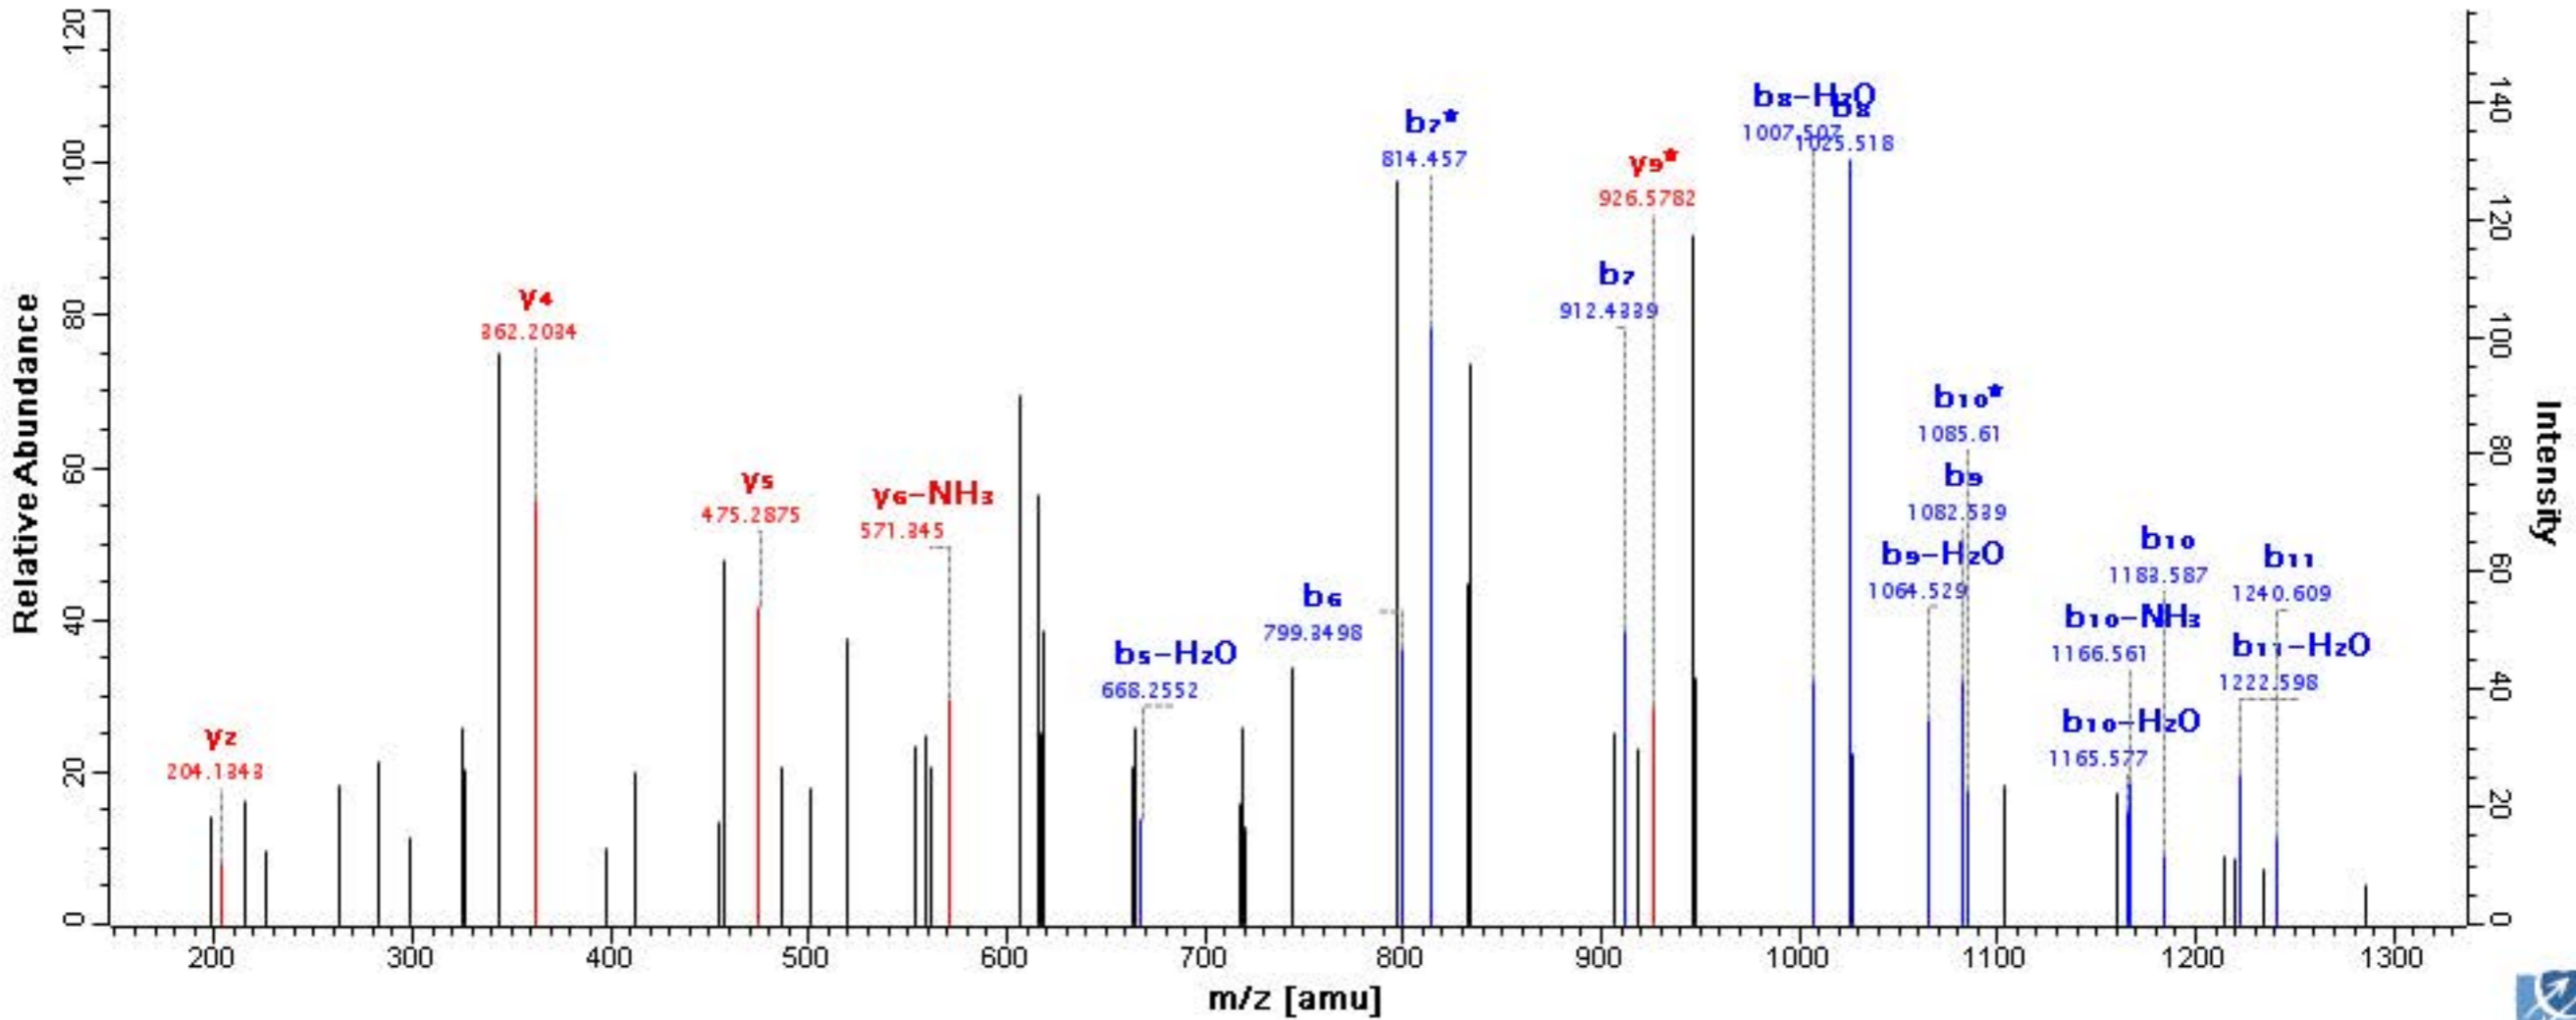

#### precursor information

|                   |                     |
|-------------------|---------------------|
| Mass:             | 1385.70622          |
| m/z:              | System.Collections. |
| Charge:           | System.Collections. |
| Retentiontime:    | System.Collections. |
| Score:            | 79.87488            |
| Mass Error [ppm]: | -0.43088            |
| PEP:              | 0.0053518           |
| Precursor Type:   | MULTI               |

#### general information

|                       |           |
|-----------------------|-----------|
| Annotation:           | 8 of 12   |
| AminoAcids Coverag    | 67 %      |
| Intensity Coverage:   | 32 %      |
| Protein Localisation: | 10 ... 21 |

| b ion           |                |    |     |    | y ion           |            |  |
|-----------------|----------------|----|-----|----|-----------------|------------|--|
| $\Delta$ dalton | mass           |    | seq |    | $\Delta$ dalton | mass       |  |
|                 | 88.039304876   | 1  | S   | 11 |                 |            |  |
|                 | 235.107718793  | 2  | F   | 10 | 1299.682063307  |            |  |
|                 | 363.166296304  | 3  | Q   | 9  | 1152.613649391  |            |  |
|                 | 530.164655122  | 4  | S   | 8  | 1024.55507188   |            |  |
|                 | 686.265766151  | 5  | R   | 7  | 857.556713061   |            |  |
| +0.0068593      | 799.349830131  | 6  | I   | 6  | 701.455602033   |            |  |
| +0.1095629      | 912.433894111  | 7  | I   | 5  | 588.371538053   |            |  |
| +0.1087509      | 1025.517958092 | 8  | I   | 4  | 475.287474072   | -0.1408066 |  |
| +0.2763741      | 1082.539421815 | 9  | G   | 3  | 362.203410092   | +0.0998736 |  |
| +0.189511       | 1183.587100289 | 10 | T   | 2  | 305.181946368   |            |  |
| +0.4176811      | 1240.608564013 | 11 | G   | 1  | 204.134267894   | -0.1459561 |  |
|                 |                | 12 | K   | 0  | 147.112804171   |            |  |

Source: 20130121\_VR\_Bsu\_TripleSILAC\_pWTPPrkCPrpCReplicate2\_F06  
 Scannumber: 1088  
 Protein: BSU06360; guaA  
 Peptide Score: 61.65  
 Method: ITMS; CID; 3

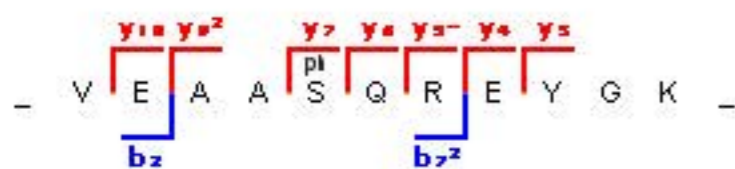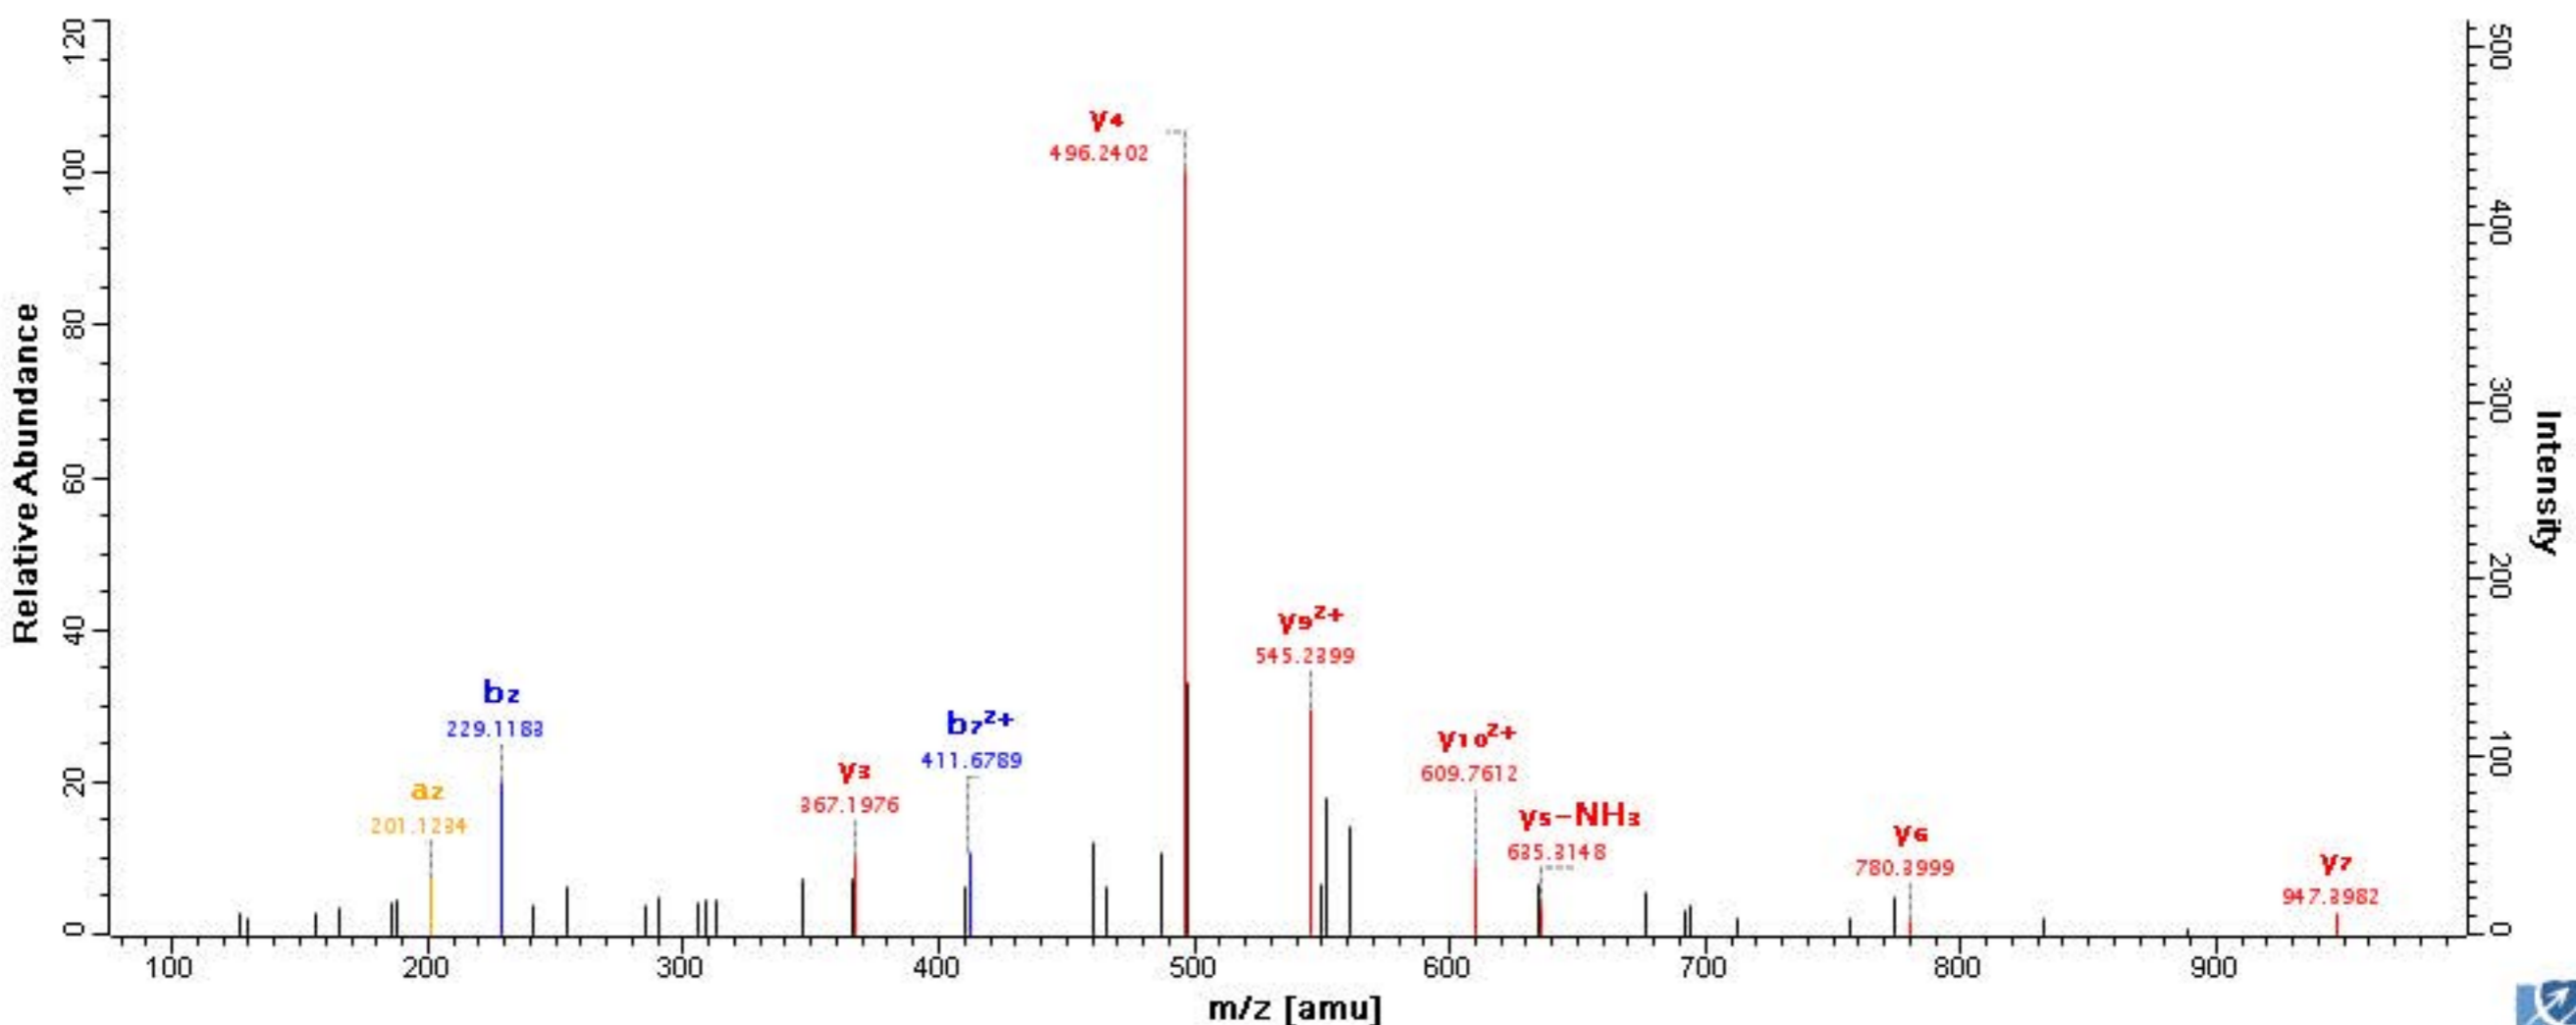

**precursor information**

|                   |                     |
|-------------------|---------------------|
| Mass:             | 1316.57587          |
| m/z:              | System.Collections. |
| Charge:           | System.Collections. |
| Retentiontime:    | System.Collections. |
| Score:            | 61.64989            |
| Mass Error [ppm]: | -0.25015            |
| PEP:              | 0.032963            |
| Precursor Type:   | MULTI               |

**general information**

|                       |            |
|-----------------------|------------|
| Annotation:           | 7 of 11    |
| AminoAcids Coverage:  | 64 %       |
| Intensity Coverage:   | 49 %       |
| Protein Localisation: | 99 ... 109 |

| a ion    |         | b <sup>2+</sup> ion |         | b ion    |         |    |     |    | y ion    |          | y <sup>2+</sup> ion |          |
|----------|---------|---------------------|---------|----------|---------|----|-----|----|----------|----------|---------------------|----------|
| Δ dalton | mass    | Δ dalton            | mass    | Δ dalton | mass    |    | seq |    | Δ dalton | mass     | Δ dalton            | mass     |
|          | 72.0808 |                     | 100.076 |          | 100.076 | 1  | V   | 10 |          |          |                     |          |
| +0.09953 | 201.123 |                     | 229.118 | +0.1282  | 229.118 | 2  | E   | 9  | 1218.52  |          | 609.761             | +0.1452  |
|          | 272.16  |                     | 300.155 |          | 300.155 | 3  | A   | 8  | 1089.47  |          | 545.24              | +0.09466 |
|          | 343.198 |                     | 371.193 |          | 371.193 | 4  | A   | 7  | 1018.44  |          | 1018.44             |          |
|          | 510.196 |                     | 538.191 |          | 538.191 | 5  | S   | 6  | 947.398  | +0.02236 | 947.398             |          |
|          | 638.255 |                     | 666.249 |          | 666.249 | 6  | Q   | 5  | 780.4    | +0.08297 | 780.4               |          |
|          | 794.356 | +0.31123            | 411.679 |          | 822.351 | 7  | R   | 4  | 652.341  |          | 652.341             |          |
|          | 923.398 |                     | 951.393 |          | 951.393 | 8  | E   | 3  | 496.24   | +0.05284 | 496.24              |          |
|          | 1086.46 |                     | 1114.46 |          | 1114.46 | 9  | Y   | 2  | 367.198  | +0.02137 | 367.198             |          |
|          | 1143.48 |                     | 1171.48 |          | 1171.48 | 10 | G   | 1  | 204.134  |          | 204.134             |          |
|          |         |                     |         |          |         | 11 | K   | 0  | 147.113  |          | 147.113             |          |

Source: 20130124\_VR\_Bsu\_TripleSILAC\_pWTPPrkCPrpCReplicate2\_F09

Scannumber: 3017

Protein: BSU14000; patA; uat

Peptide Score: 115.33

Method: ITMS; CID; 3

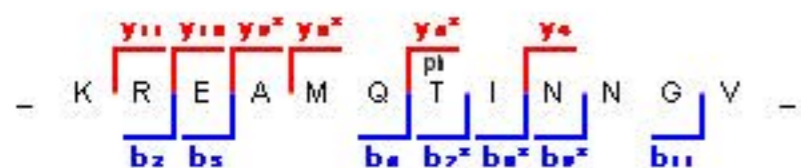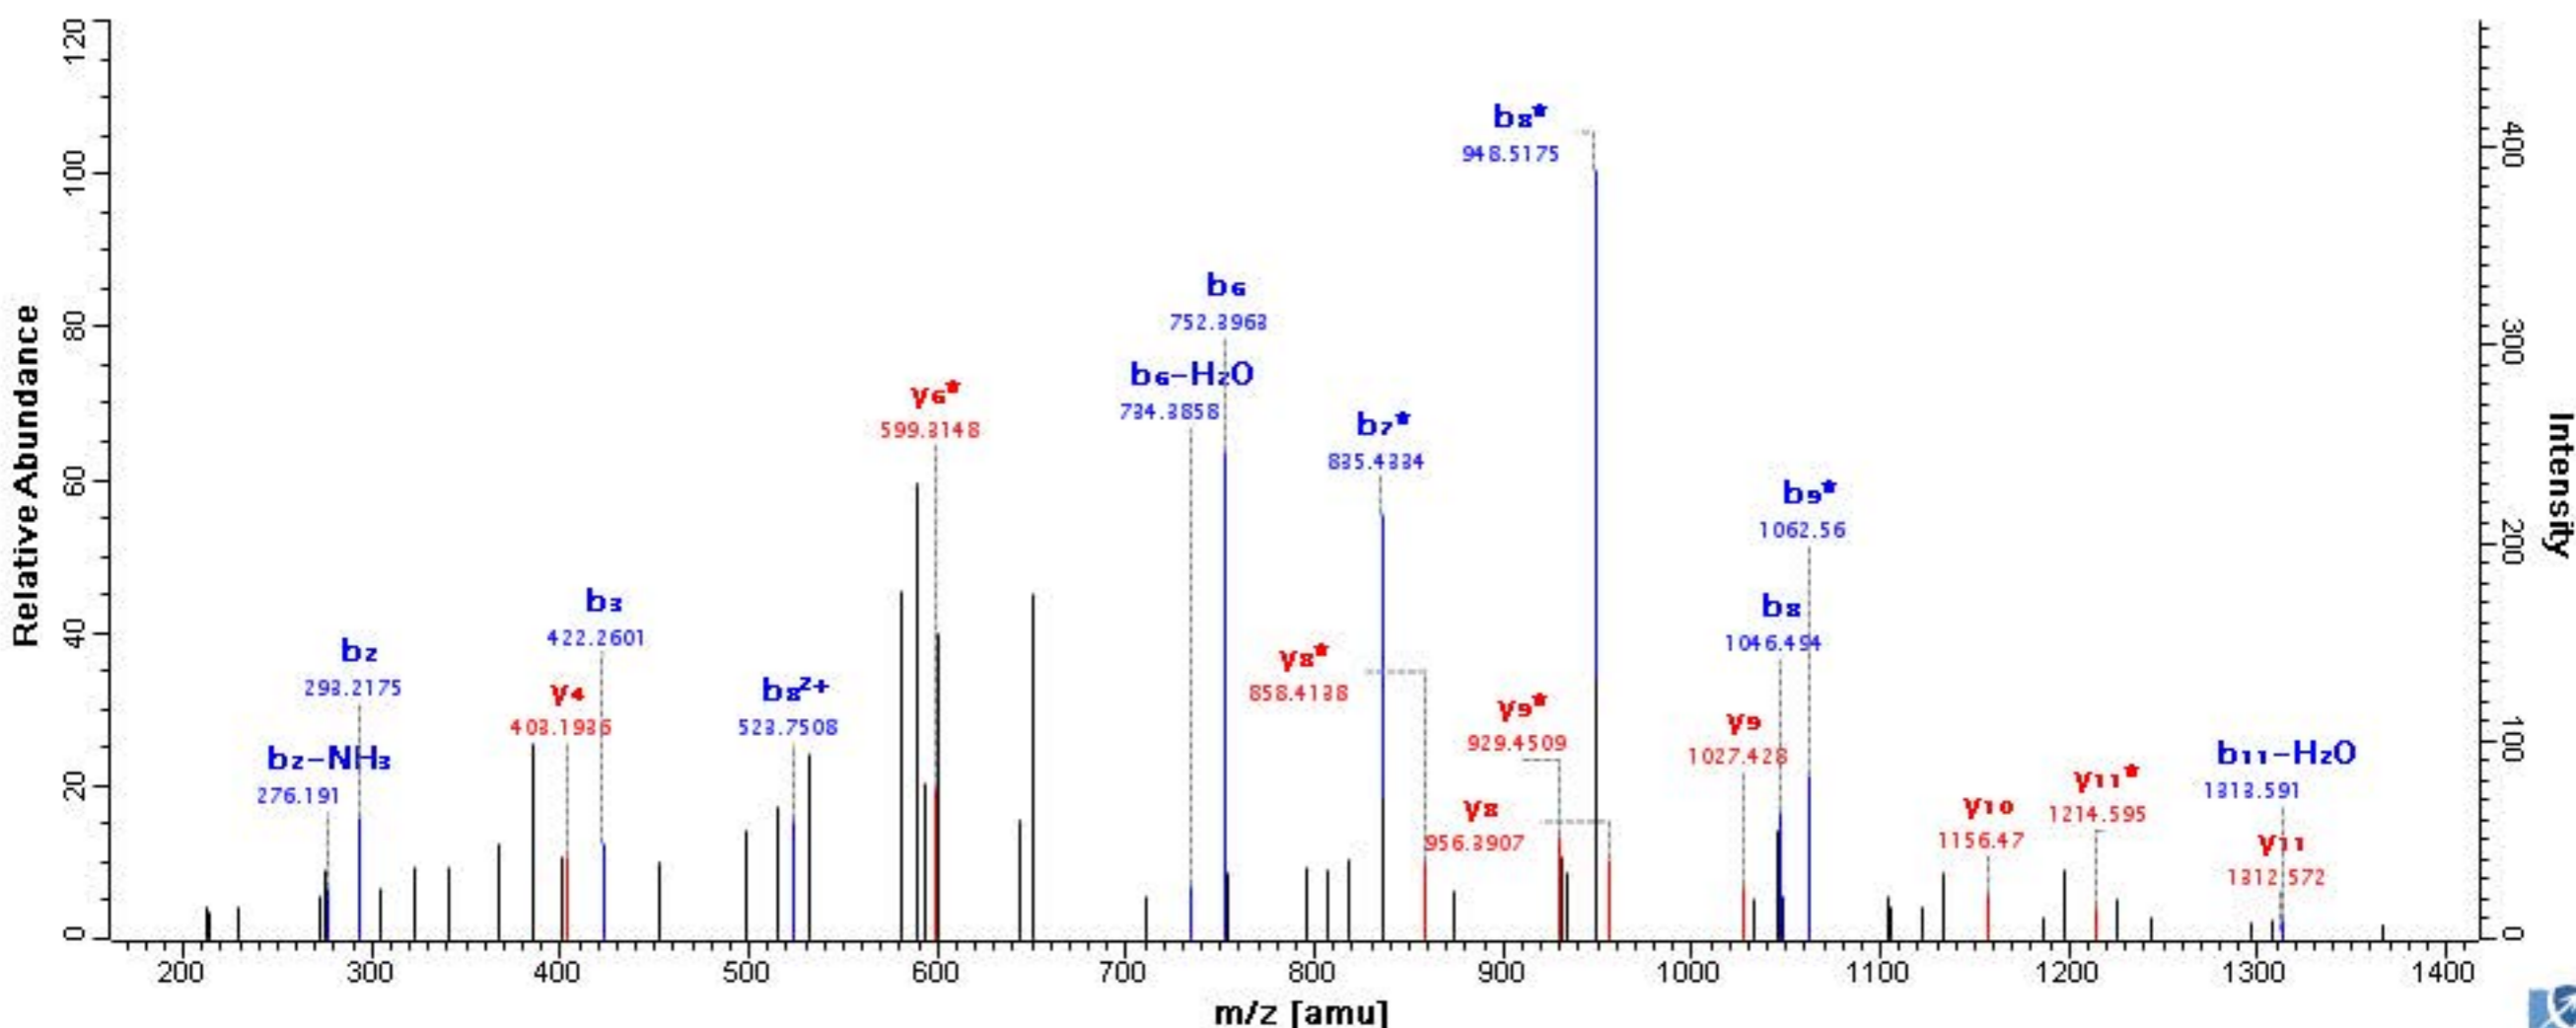

#### precursor information

|                   |                     |
|-------------------|---------------------|
| Mass:             | 1447.6732           |
| m/z:              | System.Collections. |
| Charge:           | System.Collections. |
| Retentiontime:    | System.Collections. |
| Score:            | 115.3266            |
| Mass Error [ppm]: | -0.14651            |
| PEP:              | 5.0267E-05          |
| Precursor Type:   | ISO                 |

#### general information

|                       |             |
|-----------------------|-------------|
| Annotation:           | 9 of 12     |
| AminoAcids Coverag    | 75 %        |
| Intensity Coverage:   | 39 %        |
| Protein Localisation: | 382 ... 393 |

| b <sup>2+</sup> ion |              | b ion      |              |     | y ion |          |                         |
|---------------------|--------------|------------|--------------|-----|-------|----------|-------------------------|
| Δ dalton            | mass         | Δ dalton   | mass         | seq |       | Δ dalton | mass                    |
|                     | 137.1164383  |            | 137.1164383  | 1   | K     | 11       |                         |
|                     | 293.21754933 | -0.0078325 | 293.21754933 | 2   | R     | 10       | 1312.5715266 +0.1416082 |
|                     | 422.26014242 | +0.3356828 | 422.26014242 | 3   | E     | 9        | 1156.4704156 +0.2360053 |
|                     | 493.29725621 |            | 493.29725621 | 4   | A     | 8        | 1027.4278225 -0.0531887 |
|                     | 624.33774082 |            | 624.33774082 | 5   | M     | 7        | 956.39070867 -0.0399396 |
|                     | 752.39631833 | -0.0741137 | 752.39631833 | 6   | Q     | 6        | 825.35022406            |
|                     | 933.41032721 |            | 933.41032721 | 7   | T     | 5        | 697.29164655            |
| -0.1232704          | 523.75083383 | +0.2510922 | 1046.4943912 | 8   | I     | 4        | 516.27763767            |
|                     | 1160.5373186 |            | 1160.5373186 | 9   | N     | 3        | 403.19357369 -0.0084541 |
|                     | 1274.5802461 |            | 1274.5802461 | 10  | N     | 2        | 289.15064624            |
|                     | 1331.6017098 |            | 1331.6017098 | 11  | G     | 1        | 175.10771879            |
|                     |              |            |              | 12  | V     | 0        | 118.08625507            |

Source: 20130124\_VR\_Bsu\_TripleSILAC\_pWTPPrkCPrpCReplicate2\_F09  
 Scannumber: 4726  
 Protein: BSU07140; yetF  
 Peptide Score: 65.72  
 Method: ITMS; CID; 3

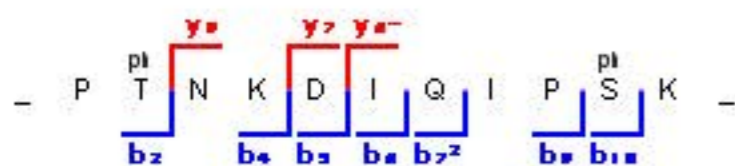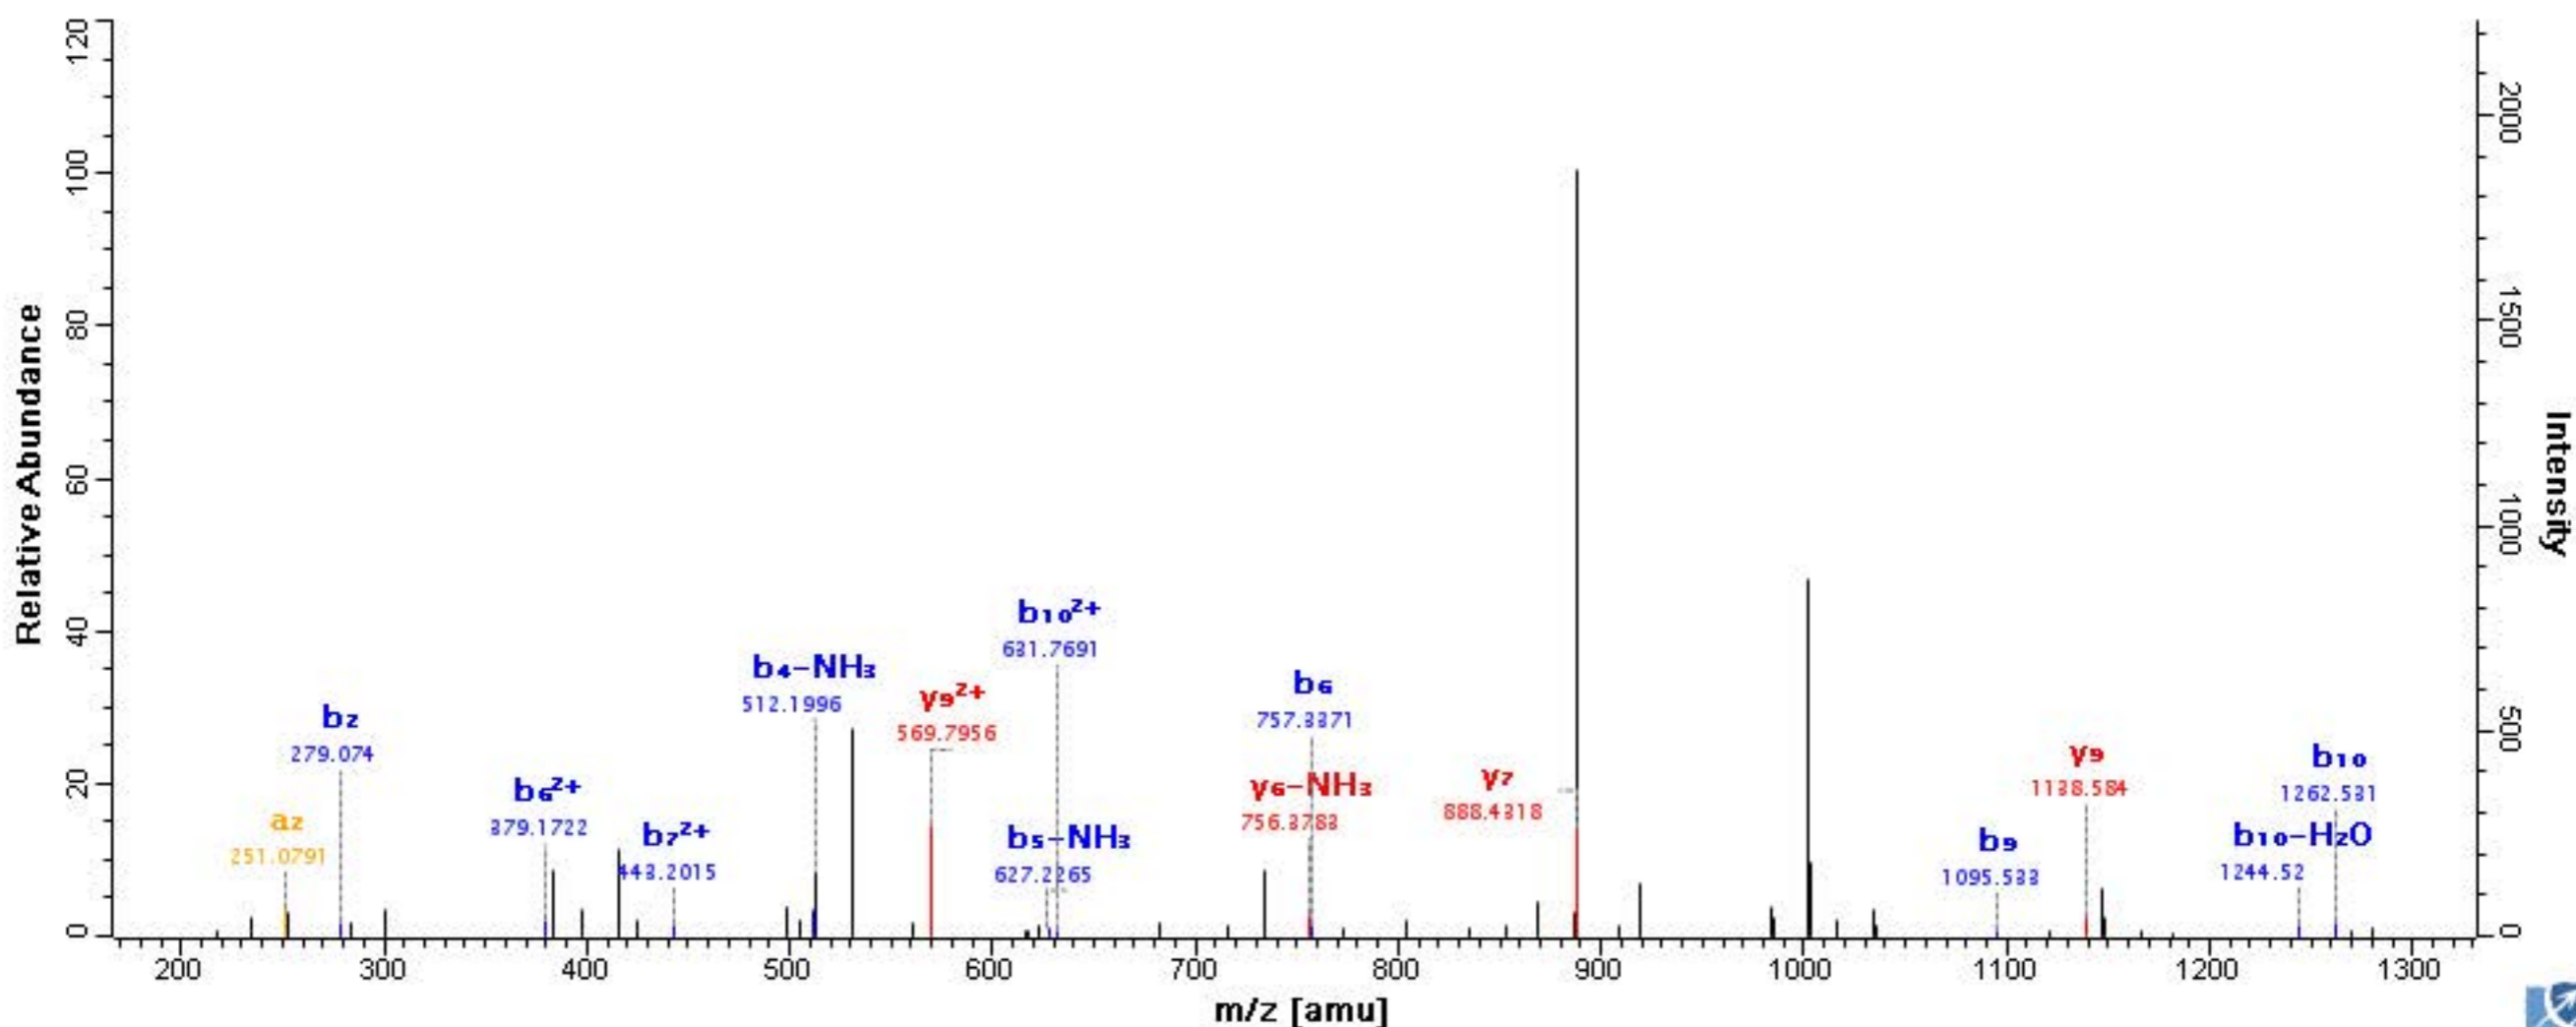

#### precursor information

|                   |                     |
|-------------------|---------------------|
| Mass:             | 1399.61434          |
| m/z:              | System.Collections. |
| Charge:           | System.Collections. |
| Retentiontime:    | System.Collections. |
| Score:            | 65.71947            |
| Mass Error [ppm]: | -0.43629            |
| PEP:              | 0.06265             |
| Precursor Type:   | MULTI               |

#### general information

|                       |             |
|-----------------------|-------------|
| Annotation:           | 8 of 11     |
| AminoAcids Coverage:  | 73 %        |
| Intensity Coverage:   | 15 %        |
| Protein Localisation: | 155 ... 165 |

| a ion    |         | b <sup>2+</sup> ion |         | b ion    |         |    |     |    | y ion    |          | y <sup>2+</sup> ion |          |
|----------|---------|---------------------|---------|----------|---------|----|-----|----|----------|----------|---------------------|----------|
| Δ dalton | mass    | Δ dalton            | mass    | Δ dalton | mass    |    | seq |    | Δ dalton | mass     | Δ dalton            | mass     |
|          | 70.0651 |                     | 98.06   |          | 98.06   | 1  | P   | 10 |          |          |                     |          |
| -0.0413  | 251.079 |                     | 279.074 | -0.0087  | 279.074 | 2  | T   | 9  | 1319.6   |          | 1319.6              |          |
|          | 365.122 |                     | 393.117 |          | 393.117 | 3  | N   | 8  | 1138.58  | +0.07263 | 569.796             | +0.09001 |
|          | 501.231 |                     | 529.226 |          | 529.226 | 4  | K   | 7  | 1024.54  |          | 1024.54             |          |
|          | 616.258 |                     | 644.253 |          | 644.253 | 5  | D   | 6  | 888.432  | +0.07293 | 888.432             |          |
|          | 729.342 | +0.1141             | 379.172 | +0.08552 | 757.337 | 6  | I   | 5  | 773.405  |          | 773.405             |          |
|          | 857.401 | +0.09092            | 443.201 |          | 885.396 | 7  | Q   | 4  | 660.321  |          | 660.321             |          |
|          | 970.485 |                     | 998.48  |          | 998.48  | 8  | I   | 3  | 532.262  |          | 532.262             |          |
|          | 1067.54 |                     | 1095.53 | -0.3989  | 1095.53 | 9  | P   | 2  | 419.178  |          | 419.178             |          |
|          | 1234.54 | -0.1895             | 631.769 | +0.05906 | 1262.53 | 10 | S   | 1  | 322.125  |          | 322.125             |          |
|          |         |                     |         |          |         | 11 | K   | 0  | 155.127  |          | 155.127             |          |

Source: 20130124\_VR\_Bsu\_TripleSILAC\_pWTPPrkCPrpCReplicate2\_F09  
 Scannumber: 6317  
 Protein: BSU12410; yjoA  
 Peptide Score: 71.74  
 Method: ITMS; CID; 3

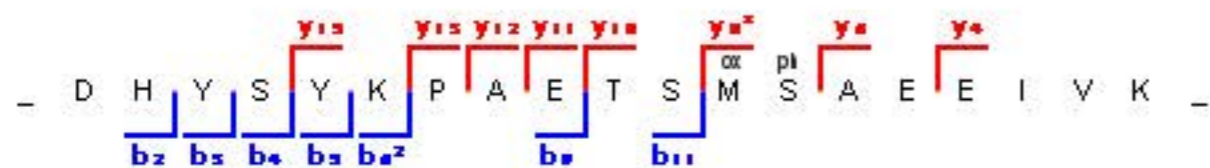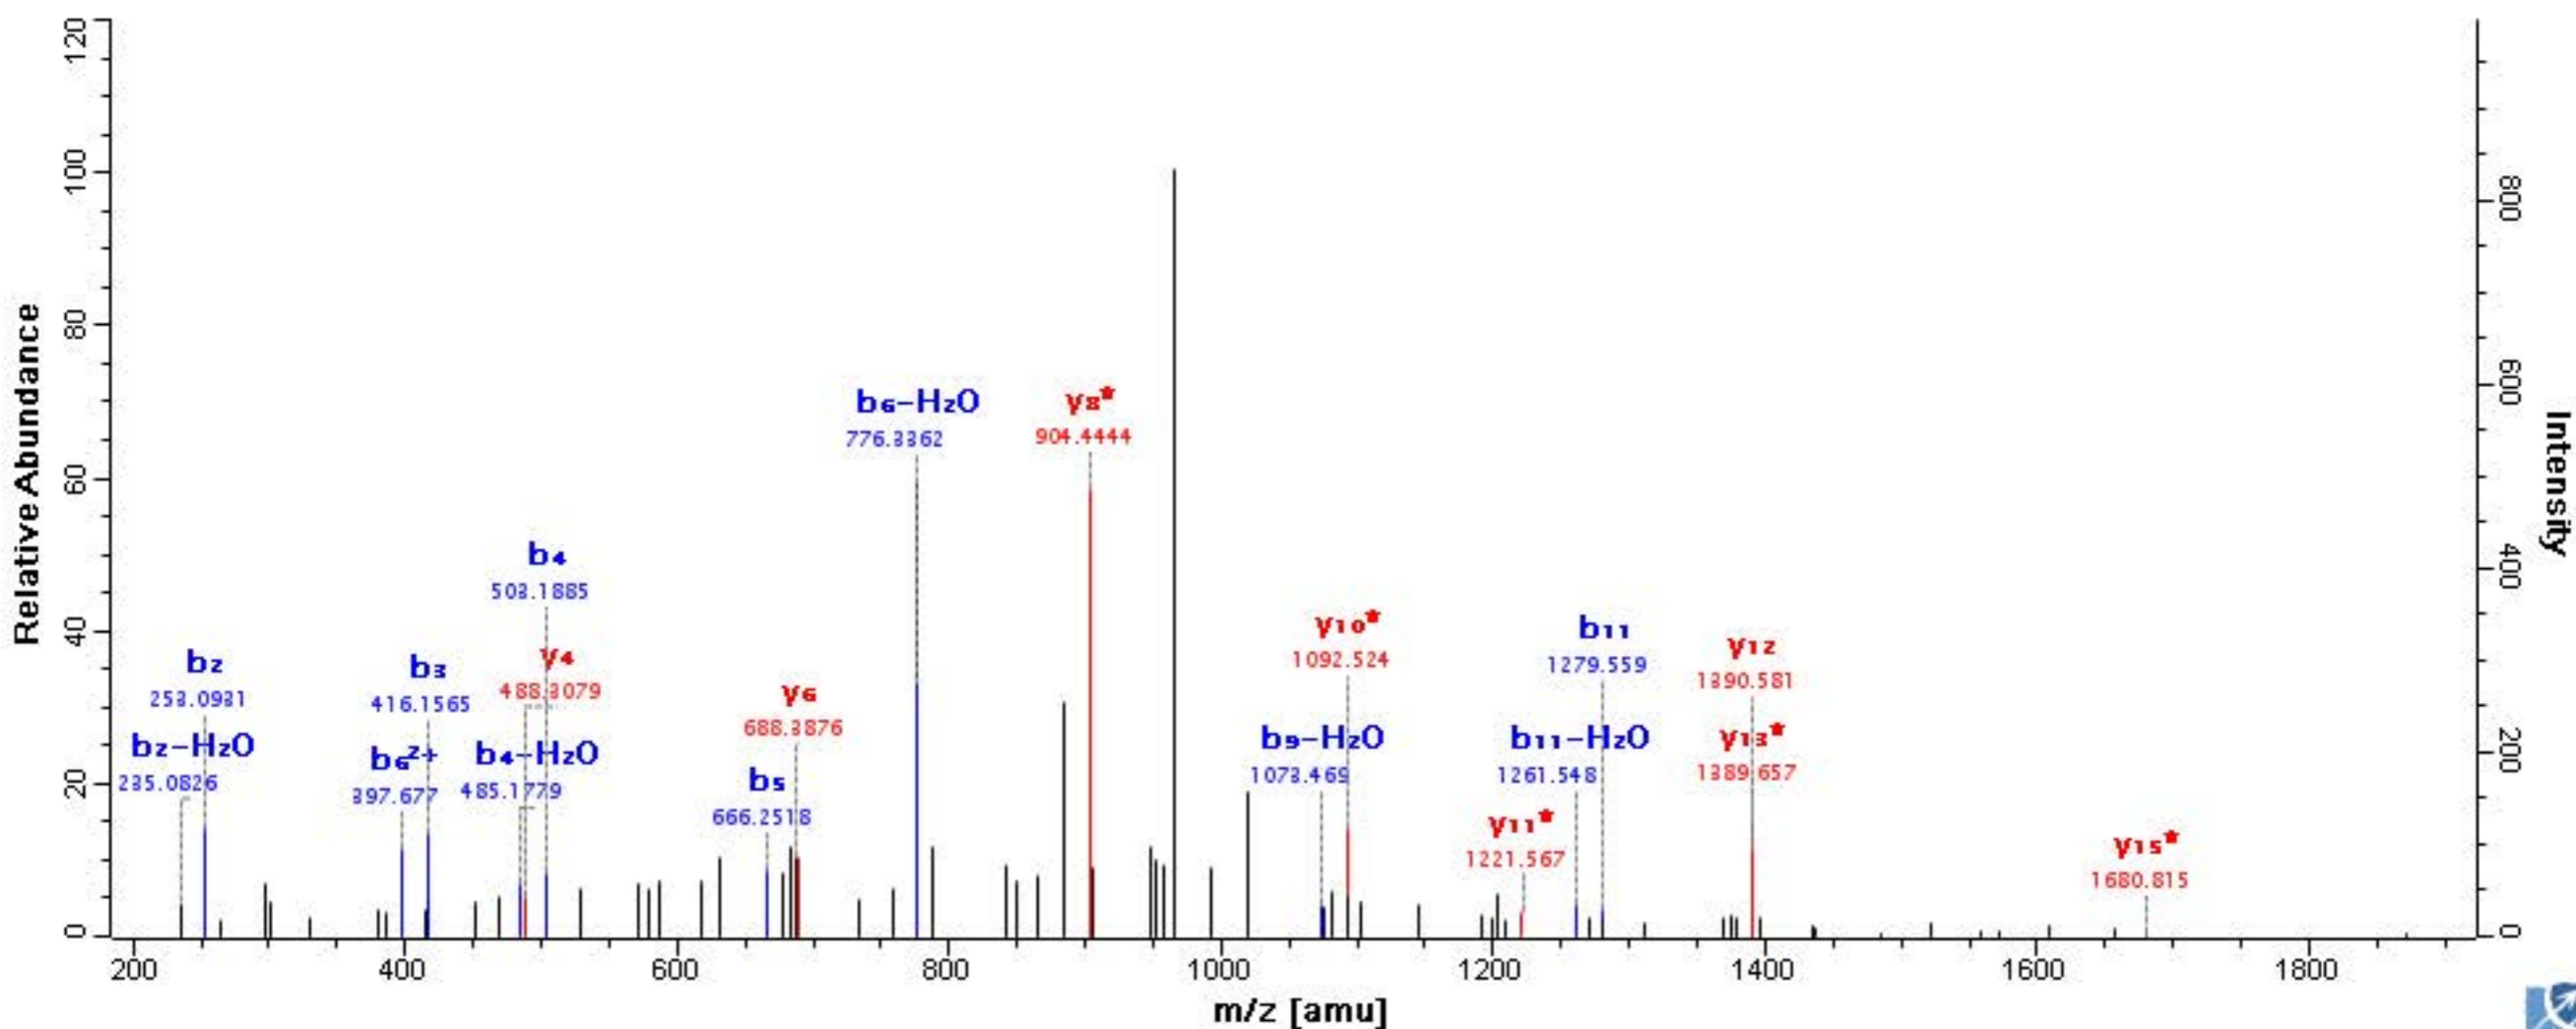

precursor information

|                   |                     |
|-------------------|---------------------|
| Mass:             | 2279.96494          |
| m/z:              | System.Collections. |
| Charge:           | System.Collections. |
| Retentiontime:    | System.Collections. |
| Score:            | 71.74218            |
| Mass Error [ppm]: | -0.35424            |
| PEP:              | 0.0017762           |
| Precursor Type:   | MULTI               |

| b <sup>2+</sup> ion |              | b ion      |              |    |     | y ion |              |            |
|---------------------|--------------|------------|--------------|----|-----|-------|--------------|------------|
| Δ dalton            | mass         | Δ dalton   | mass         |    | seq |       | Δ dalton     | mass       |
|                     | 116.0342195  |            | 116.0342195  | 1  | D   | 18    |              |            |
|                     | 253.09313136 | +0.1003806 | 253.09313136 | 2  | H   | 17    | 2165.9460781 |            |
|                     | 416.1564599  | +0.1004371 | 416.1564599  | 3  | Y   | 16    | 2028.8871662 |            |
|                     | 503.18848831 | +0.1547124 | 503.18848831 | 4  | S   | 15    | 1865.8238377 |            |
|                     | 666.25181685 | +0.1209859 | 666.25181685 | 5  | Y   | 14    | 1778.7918093 |            |
| +0.4560895          | 397.67702817 |            | 794.34677987 | 6  | K   | 13    | 1615.7284807 |            |
|                     | 891.39954372 |            | 891.39954372 | 7  | P   | 12    | 1487.6335177 |            |
|                     | 962.4366575  |            | 962.4366575  | 8  | A   | 11    | 1390.5807539 | +0.2876543 |
|                     | 1091.4792506 |            | 1091.4792506 | 9  | E   | 10    | 1319.5436401 |            |
|                     | 1192.5269291 |            | 1192.5269291 | 10 | T   | 9     | 1190.501047  |            |
|                     | 1279.5589575 | +0.165774  | 1279.5589575 | 11 | S   | 8     | 1089.4533685 |            |
|                     | 1426.5943567 |            | 1426.5943567 | 12 | M   | 7     | 1002.4213401 |            |
|                     | 1593.5927155 |            | 1593.5927155 | 13 | S   | 6     | 855.38594087 |            |
|                     | 1664.6298293 |            | 1664.6298293 | 14 | A   | 5     | 688.38758205 | +0.1082065 |
|                     | 1793.6724224 |            | 1793.6724224 | 15 | E   | 4     | 617.35046826 |            |
|                     | 1922.7150155 |            | 1922.7150155 | 16 | E   | 3     | 488.30787516 | +0.0939193 |
|                     | 2035.7990795 |            | 2035.7990795 | 17 | I   | 2     | 359.26528207 |            |
|                     | 2134.8674934 |            | 2134.8674934 | 18 | V   | 1     | 246.18121809 |            |
|                     |              |            |              | 19 | K   | 0     | 147.11280417 |            |

general information

|                       |           |
|-----------------------|-----------|
| Annotation:           | 13 of 19  |
| AminoAcids Coverag    | 68 %      |
| Intensity Coverage:   | 32 %      |
| Protein Localisation: | 28 ... 46 |

Source: 20130124\_VR\_Bsu\_TripleSILAC\_pWTPPrkCPrpCReplicate2\_F20  
 Scannumber: 1500  
 Protein: BSU25020; sodA; yggD  
 Peptide Score: 140.78  
 Method: ITMS; CID; 3

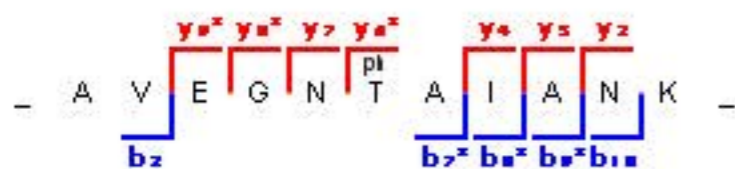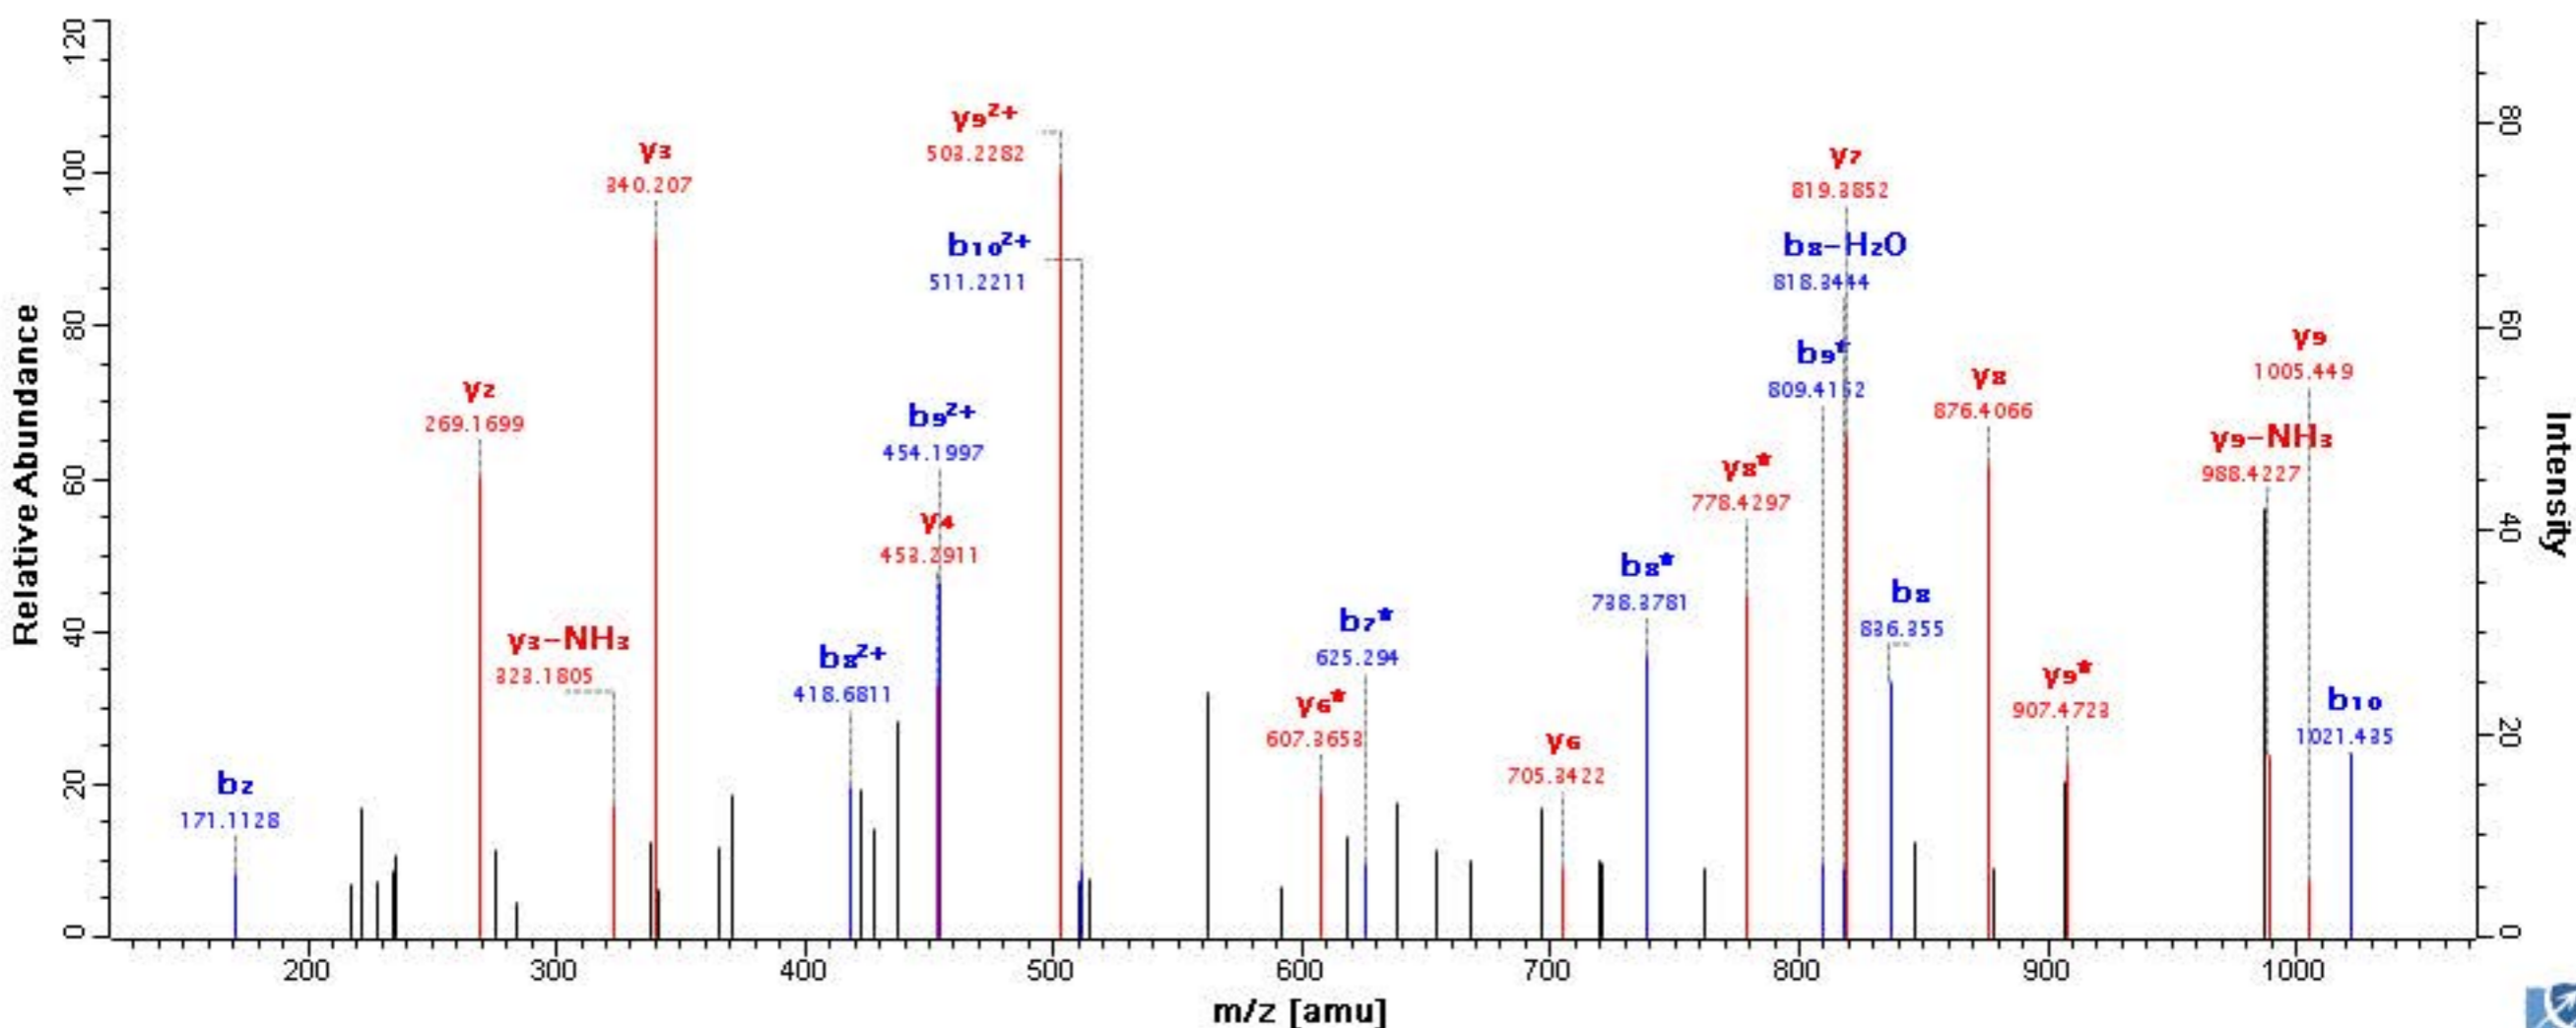

#### precursor information

|                   |                     |
|-------------------|---------------------|
| Mass:             | 1166.5335           |
| m/z:              | System.Collections. |
| Charge:           | System.Collections. |
| Retentiontime:    | System.Collections. |
| Score:            | 140.7803            |
| Mass Error [ppm]: | 0.19973             |
| PEP:              | 2.8126E-11          |
| Precursor Type:   | MULTI               |

#### general information

|                       |           |
|-----------------------|-----------|
| Annotation:           | 9 of 11   |
| AminoAcids Coverage:  | 82 %      |
| Intensity Coverage:   | 64 %      |
| Protein Localisation: | 42 ... 52 |

| $\text{b}^{2+}$ ion |          | b ion           |          | seq |   |    | $\text{y}$ ion  |           | $\text{y}^{2+}$ ion |           |
|---------------------|----------|-----------------|----------|-----|---|----|-----------------|-----------|---------------------|-----------|
| $\Delta$ dalton     | mass     | $\Delta$ dalton | mass     |     |   |    | $\Delta$ dalton | mass      | $\Delta$ dalton     | mass      |
|                     | 72.04439 |                 | 72.04439 | 1   | A | 10 |                 |           |                     |           |
|                     | 171.1128 | +0.077183       | 171.1128 | 2   | V | 9  | 1104.518        |           | 1104.518            |           |
|                     | 300.1554 |                 | 300.1554 | 3   | E | 8  | 1005.449        | +0.064701 | 503.2282            | +0.146327 |
|                     | 357.1769 |                 | 357.1769 | 4   | G | 7  | 876.4066        | -0.105291 | 876.4066            |           |
|                     | 471.2198 |                 | 471.2198 | 5   | N | 6  | 819.3852        | -0.037685 | 819.3852            |           |
|                     | 652.2338 |                 | 652.2338 | 6   | T | 5  | 705.3422        | -0.143378 | 705.3422            |           |
|                     | 723.2709 |                 | 723.2709 | 7   | A | 4  | 524.3282        |           | 524.3282            |           |
| -0.332676           | 418.6811 | +0.315679       | 836.355  | 8   | I | 3  | 453.2911        | +0.001861 | 453.2911            |           |
| +0.236902           | 454.1997 |                 | 907.3921 | 9   | A | 2  | 340.207         | -0.069837 | 340.207             |           |
| -0.307938           | 511.2211 | +0.320111       | 1021.435 | 10  | N | 1  | 269.1699        | -0.05259  | 269.1699            |           |
|                     |          |                 |          | 11  | K | 0  | 155.127         |           | 155.127             |           |

Source: 20130124\_VR\_Bsu\_TripleSILAC\_pWTPPrkCPrpCReplicate2\_F20  
 Scannumber: 3911  
 Protein: BSU15430; ile5  
 Peptide Score: 68.36  
 Method: ITMS; CID; 3

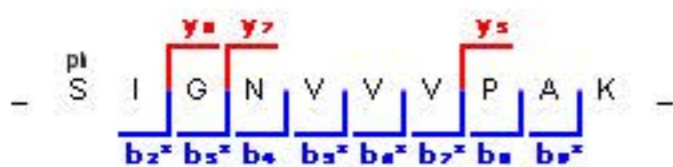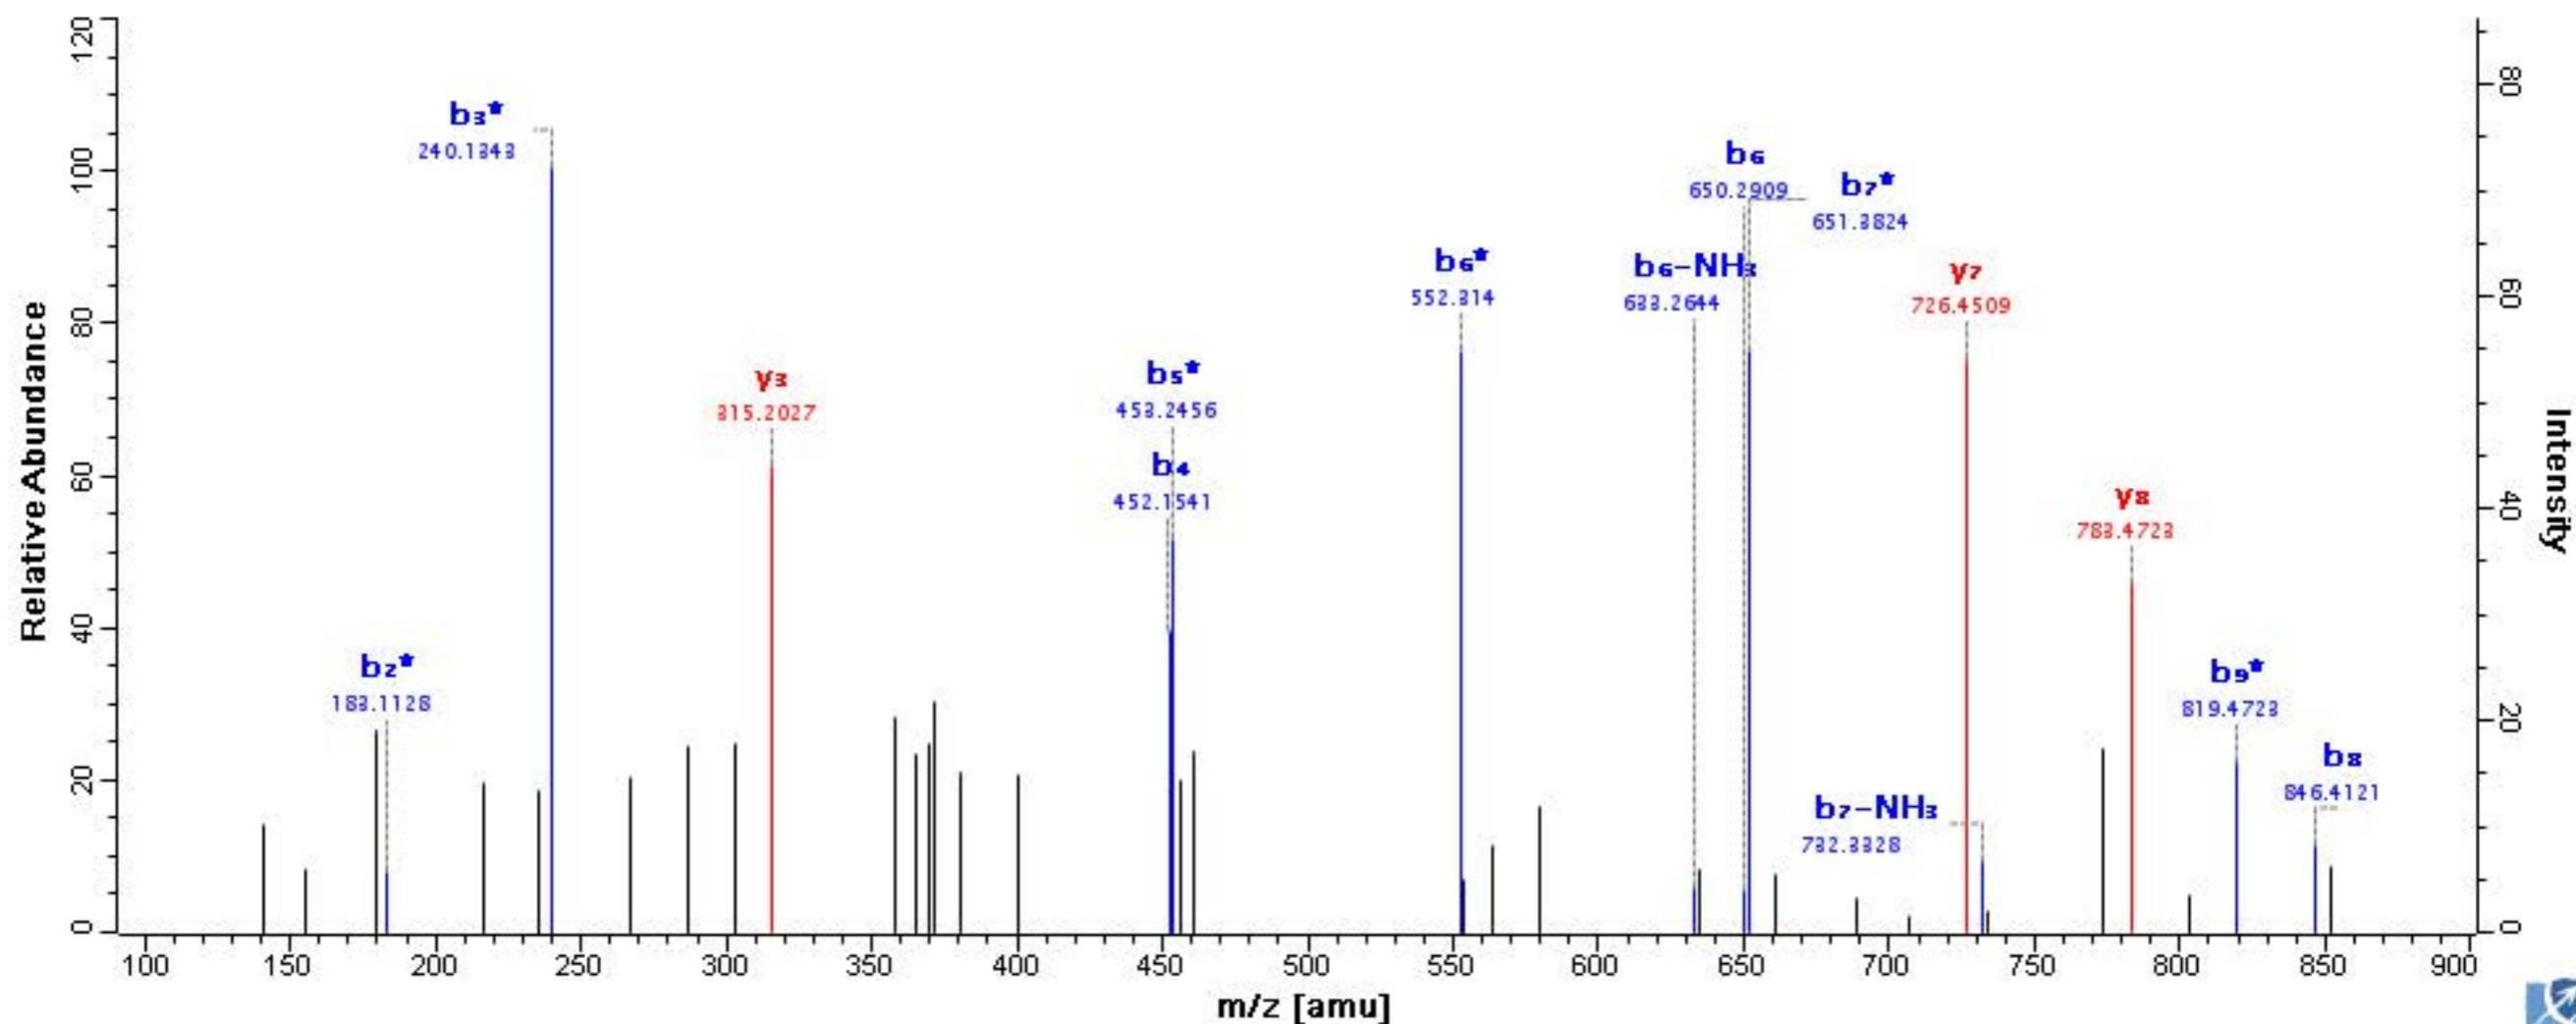

**precursor information**

|                   |                     |
|-------------------|---------------------|
| Mass:             | 1062.54773          |
| m/z:              | System.Collections. |
| Charge:           | System.Collections. |
| Retentiontime:    | System.Collections. |
| Score:            | 68.35548            |
| Mass Error [ppm]: | 0.25291             |
| PEP:              | 0.013223            |
| Precursor Type:   | MULTI               |

**general information**

|                       |             |
|-----------------------|-------------|
| Annotation:           | 8 of 10     |
| AminoAcids Coverage:  | 80 %        |
| Intensity Coverage:   | 56 %        |
| Protein Localisation: | 598 ... 607 |

| b ion      |               |    |     |   | y ion         |      |  |            |  |
|------------|---------------|----|-----|---|---------------|------|--|------------|--|
| Δ dalton   | mass          |    | seq |   | Δ dalton      | mass |  |            |  |
|            | 168.005635285 | 1  | S   | 9 |               |      |  |            |  |
|            | 281.089699265 | 2  | I   | 8 | 896.55637871  |      |  |            |  |
|            | 338.111162989 | 3  | G   | 7 | 783.47231473  |      |  | +0.1295529 |  |
| +0.1607289 | 452.154090436 | 4  | N   | 6 | 726.450851006 |      |  | +0.198441  |  |
|            | 551.222504352 | 5  | V   | 5 | 612.407923559 |      |  |            |  |
| -0.0757693 | 650.290918268 | 6  | V   | 4 | 513.339509643 |      |  |            |  |
|            | 749.359332185 | 7  | V   | 3 | 414.271095727 |      |  |            |  |
| -0.0233631 | 846.412096037 | 8  | P   | 2 | 315.20268181  |      |  | +0.0482948 |  |
|            | 917.449209824 | 9  | A   | 1 | 218.149917958 |      |  |            |  |
|            |               | 10 | K   | 0 | 147.112804171 |      |  |            |  |



Source: 20130124\_VR\_Bsu\_TripleSILAC\_pWTPPrkCPrpCReplicate2\_F20  
 Scannumber: 4682  
 Protein: azoR2; BSU33540; yvaB  
 Peptide Score: 220.46  
 Method: ITMS; CID; 3

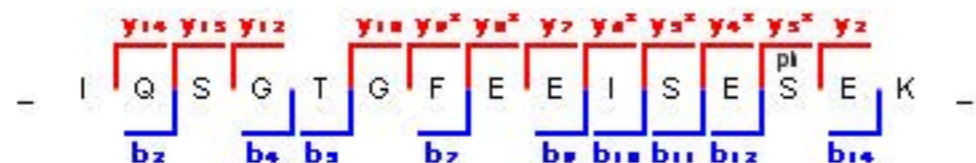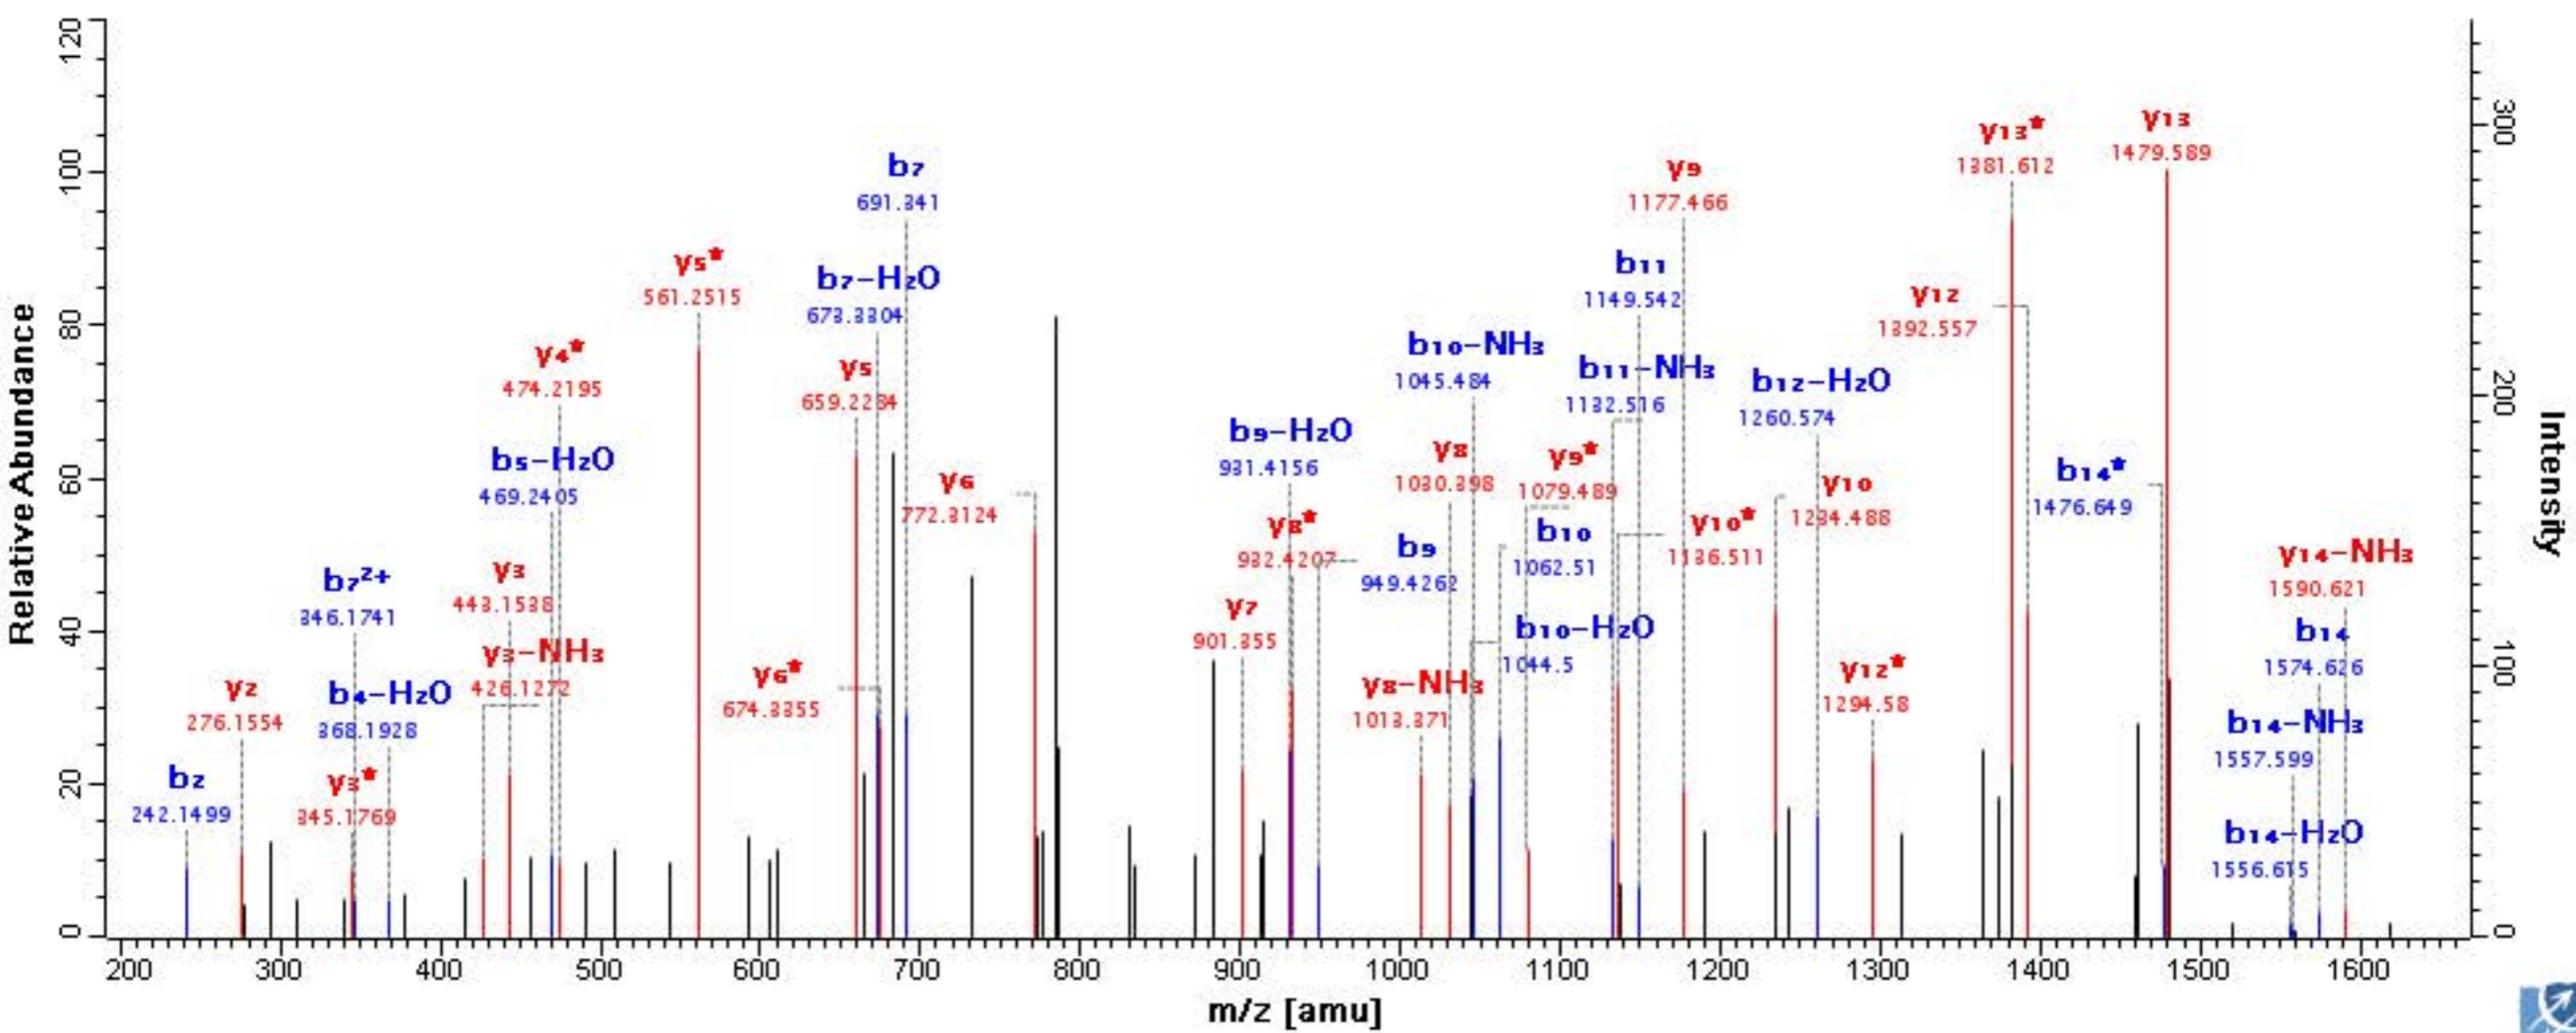

**precursor information**

|                   |                     |
|-------------------|---------------------|
| Mass:             | 1719.72498          |
| m/z:              | System.Collections. |
| Charge:           | System.Collections. |
| Retentiontime:    | System.Collections. |
| Score:            | 220.4599            |
| Mass Error [ppm]: | 0.54634             |
| PEP:              | 2.8756E-80          |
| Precursor Type:   | MULTI               |

**general information**

|                       |           |
|-----------------------|-----------|
| Annotation:           | 13 of 15  |
| AminoAcids Coverag    | 87 %      |
| Intensity Coverage:   | 58 %      |
| Protein Localisation: | 63 ... 77 |

| b <sup>2+</sup> ion |              | b ion      |              |    |     |    | γ ion        |            |
|---------------------|--------------|------------|--------------|----|-----|----|--------------|------------|
| Δ dalton            | mass         | Δ dalton   | mass         |    | seq |    | Δ dalton     | mass       |
|                     | 114.09134045 |            | 114.09134045 | 1  | I   | 14 |              |            |
|                     | 242.14991796 | -0.0176853 | 242.14991796 | 2  | Q   | 13 | 1607.6472535 |            |
|                     | 329.18194637 |            | 329.18194637 | 3  | S   | 12 | 1479.588676  | +0.1406941 |
|                     | 386.20341009 |            | 386.20341009 | 4  | G   | 11 | 1392.5566476 | +0.2752616 |
|                     | 487.25108857 |            | 487.25108857 | 5  | T   | 10 | 1335.5351839 |            |
|                     | 544.27255229 |            | 544.27255229 | 6  | G   | 9  | 1234.4875054 | -0.050982  |
| +0.1547056          | 346.17412134 | +0.1844855 | 691.34096621 | 7  | F   | 8  | 1177.4660417 | +0.0362777 |
|                     | 820.3835593  |            | 820.3835593  | 8  | E   | 7  | 1030.3976278 | -0.0322713 |
|                     | 949.4261524  | +0.2101391 | 949.4261524  | 9  | E   | 6  | 901.35503467 | +0.0909492 |
|                     | 1062.5102164 | -0.0883414 | 1062.5102164 | 10 | I   | 5  | 772.31244157 | +0.0966771 |
|                     | 1149.5422448 | +0.3044349 | 1149.5422448 | 11 | S   | 4  | 659.22837759 | +0.1899574 |
|                     | 1278.5848379 |            | 1278.5848379 | 12 | E   | 3  | 572.19634918 |            |
|                     | 1445.5831967 |            | 1445.5831967 | 13 | S   | 2  | 443.15375609 | +0.0637732 |
|                     | 1574.6257898 | +0.0476721 | 1574.6257898 | 14 | E   | 1  | 276.15539727 | +0.1309492 |
|                     |              |            |              | 15 | K   | 0  | 147.11280417 |            |



Source: 20130124\_VR\_Bsu\_TripleSILAC\_pWTPPrkCPrpCReplicate2\_F21  
 Scannumber: 3588  
 Protein: BSU28290; ilvC  
 Peptide Score: 108.43  
 Method: ITMS; CID; 3

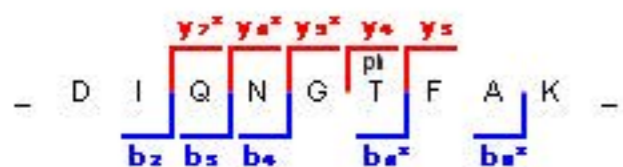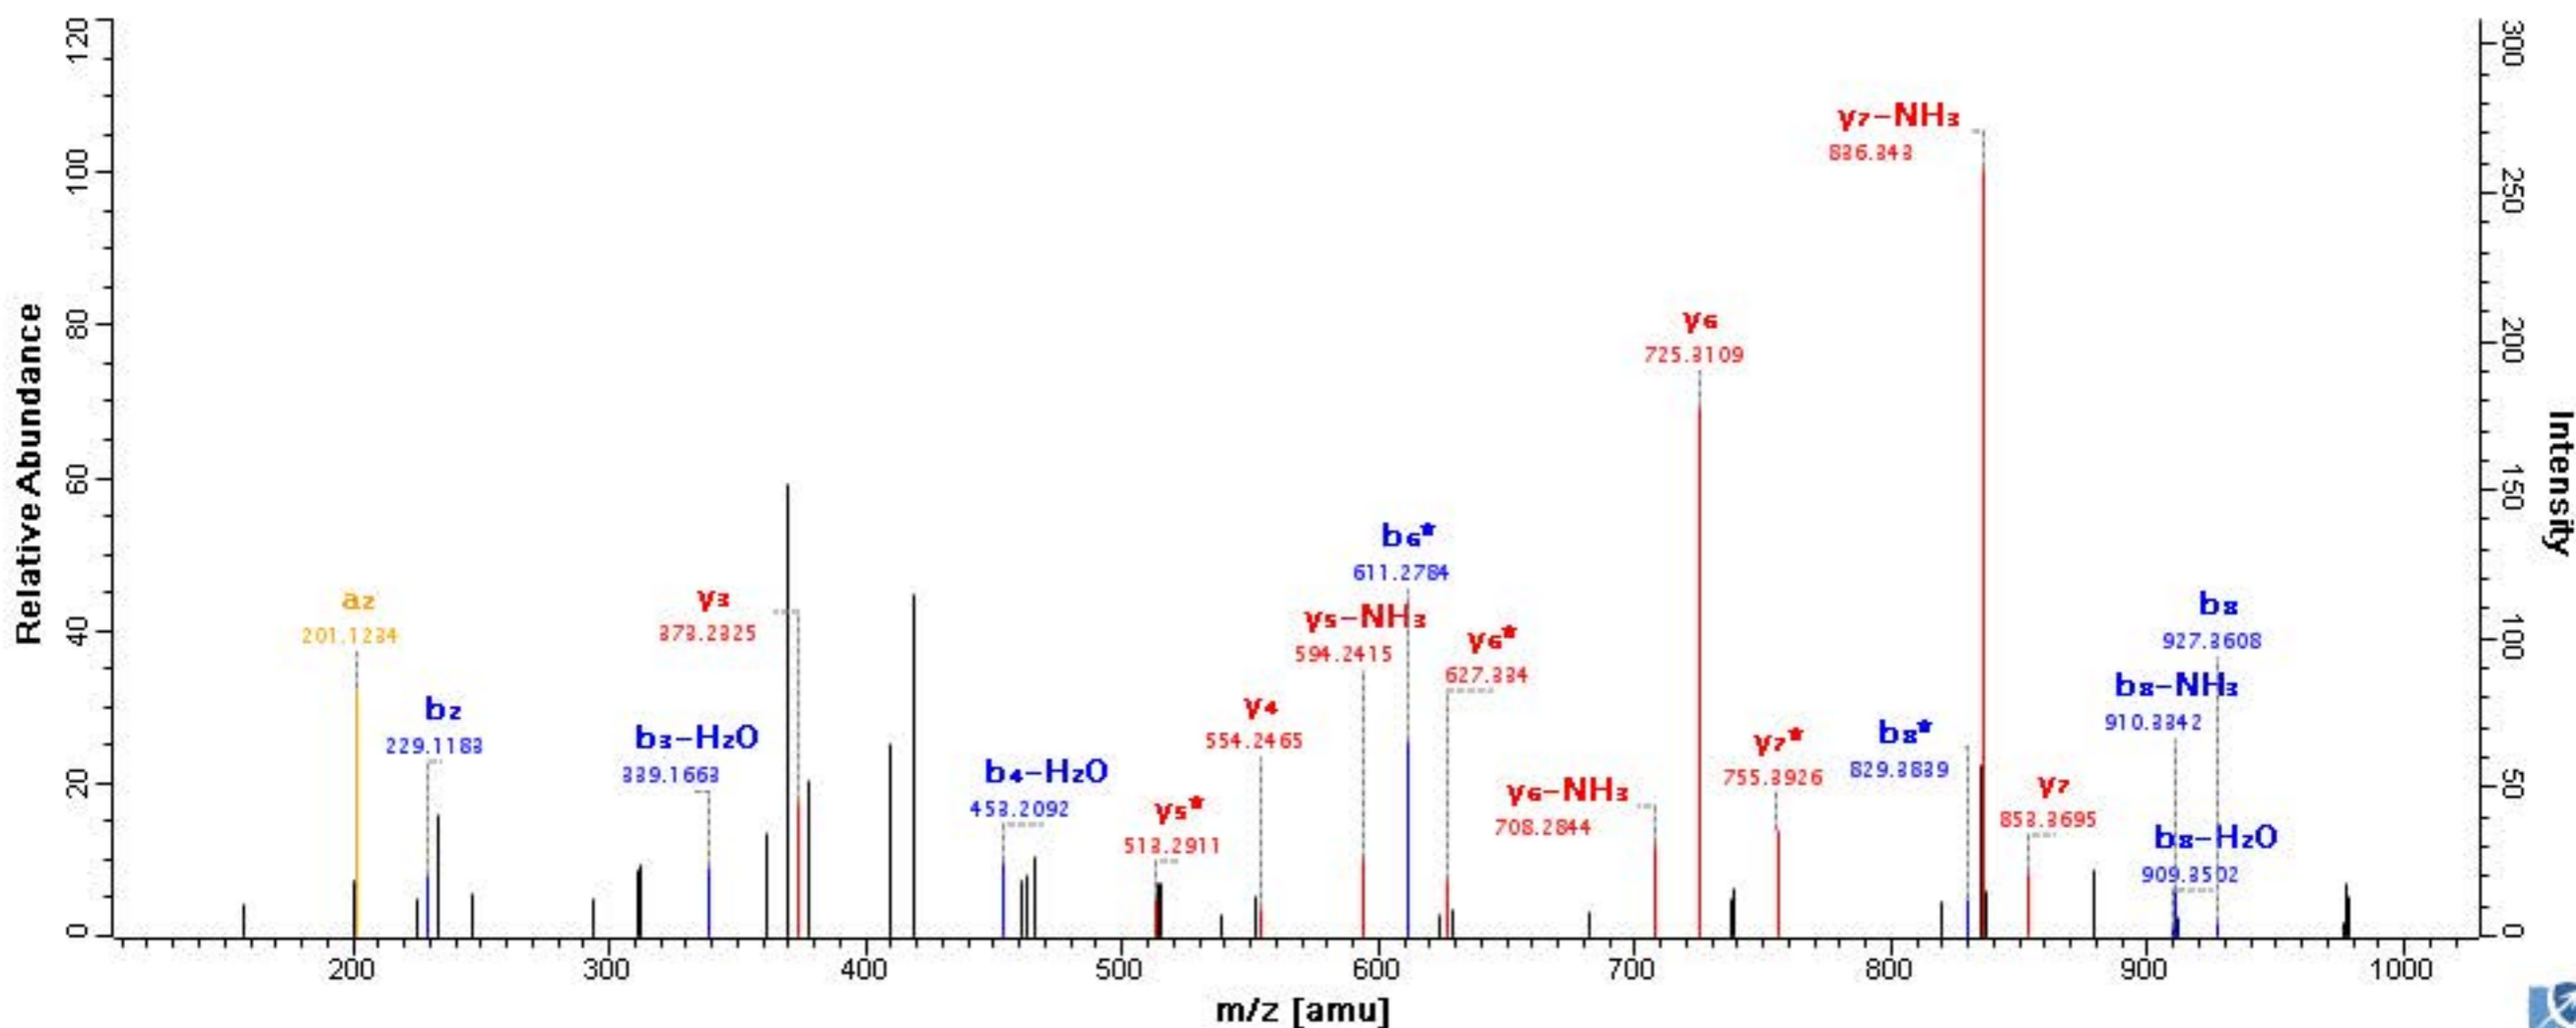

#### precursor information

|                       |                     |
|-----------------------|---------------------|
| Mass:                 | 1072.45946          |
| m/z:                  | System.Collections. |
| Charge:               | System.Collections. |
| Retentiontime:        | System.Collections. |
| Score:                | 108.433             |
| Mass Error [ppm]:     | 0.38701             |
| PEP:                  | 0.0027682           |
| g Precursor Type:     | MULTI               |
| Annotation:           | 7 of 9              |
| AminoAcids Coverag    | 78 %                |
| Intensity Coverage:   | 50 %                |
| Protein Localisation: | 280 ... 288         |

| a ion     |              | b ion      |              |     | y ion |          |                         |
|-----------|--------------|------------|--------------|-----|-------|----------|-------------------------|
| Δ dalton  | mass         | Δ dalton   | mass         | seq |       | Δ dalton | mass                    |
|           | 88.039304876 |            | 116.0342195  | 1   | D     | 8        |                         |
| +0.045134 | 201.12336886 | +0.1409176 | 229.11828348 | 2   | I     | 7        | 966.45357223            |
|           | 329.18194637 |            | 357.17686099 | 3   | Q     | 6        | 853.36950825 +0.1874375 |
|           | 443.22487382 |            | 471.21978844 | 4   | N     | 5        | 725.31093074 +0.1249213 |
|           | 500.24633754 |            | 528.24125216 | 5   | G     | 4        | 611.26800329            |
|           | 681.26034642 |            | 709.25526104 | 6   | T     | 3        | 554.24653957 +0.0868345 |
|           | 828.32876034 |            | 856.32367496 | 7   | F     | 2        | 373.23253069 +0.0929088 |
|           | 899.36587413 | +0.0833641 | 927.36078875 | 8   | A     | 1        | 226.16411677            |
|           |              |            |              | 9   | K     | 0        | 155.12700298            |

Source: 20130124\_VR\_Bsu\_TripleSILAC\_pWTPPrkCPrpCReplicate2\_F21  
 Scannumber: 5074  
 Protein: BSU27320; greA  
 Peptide Score: 142.45  
 Method: ITMS; CID; 3

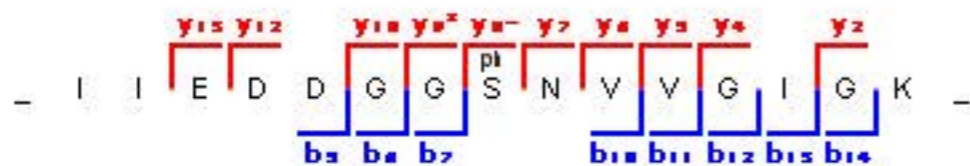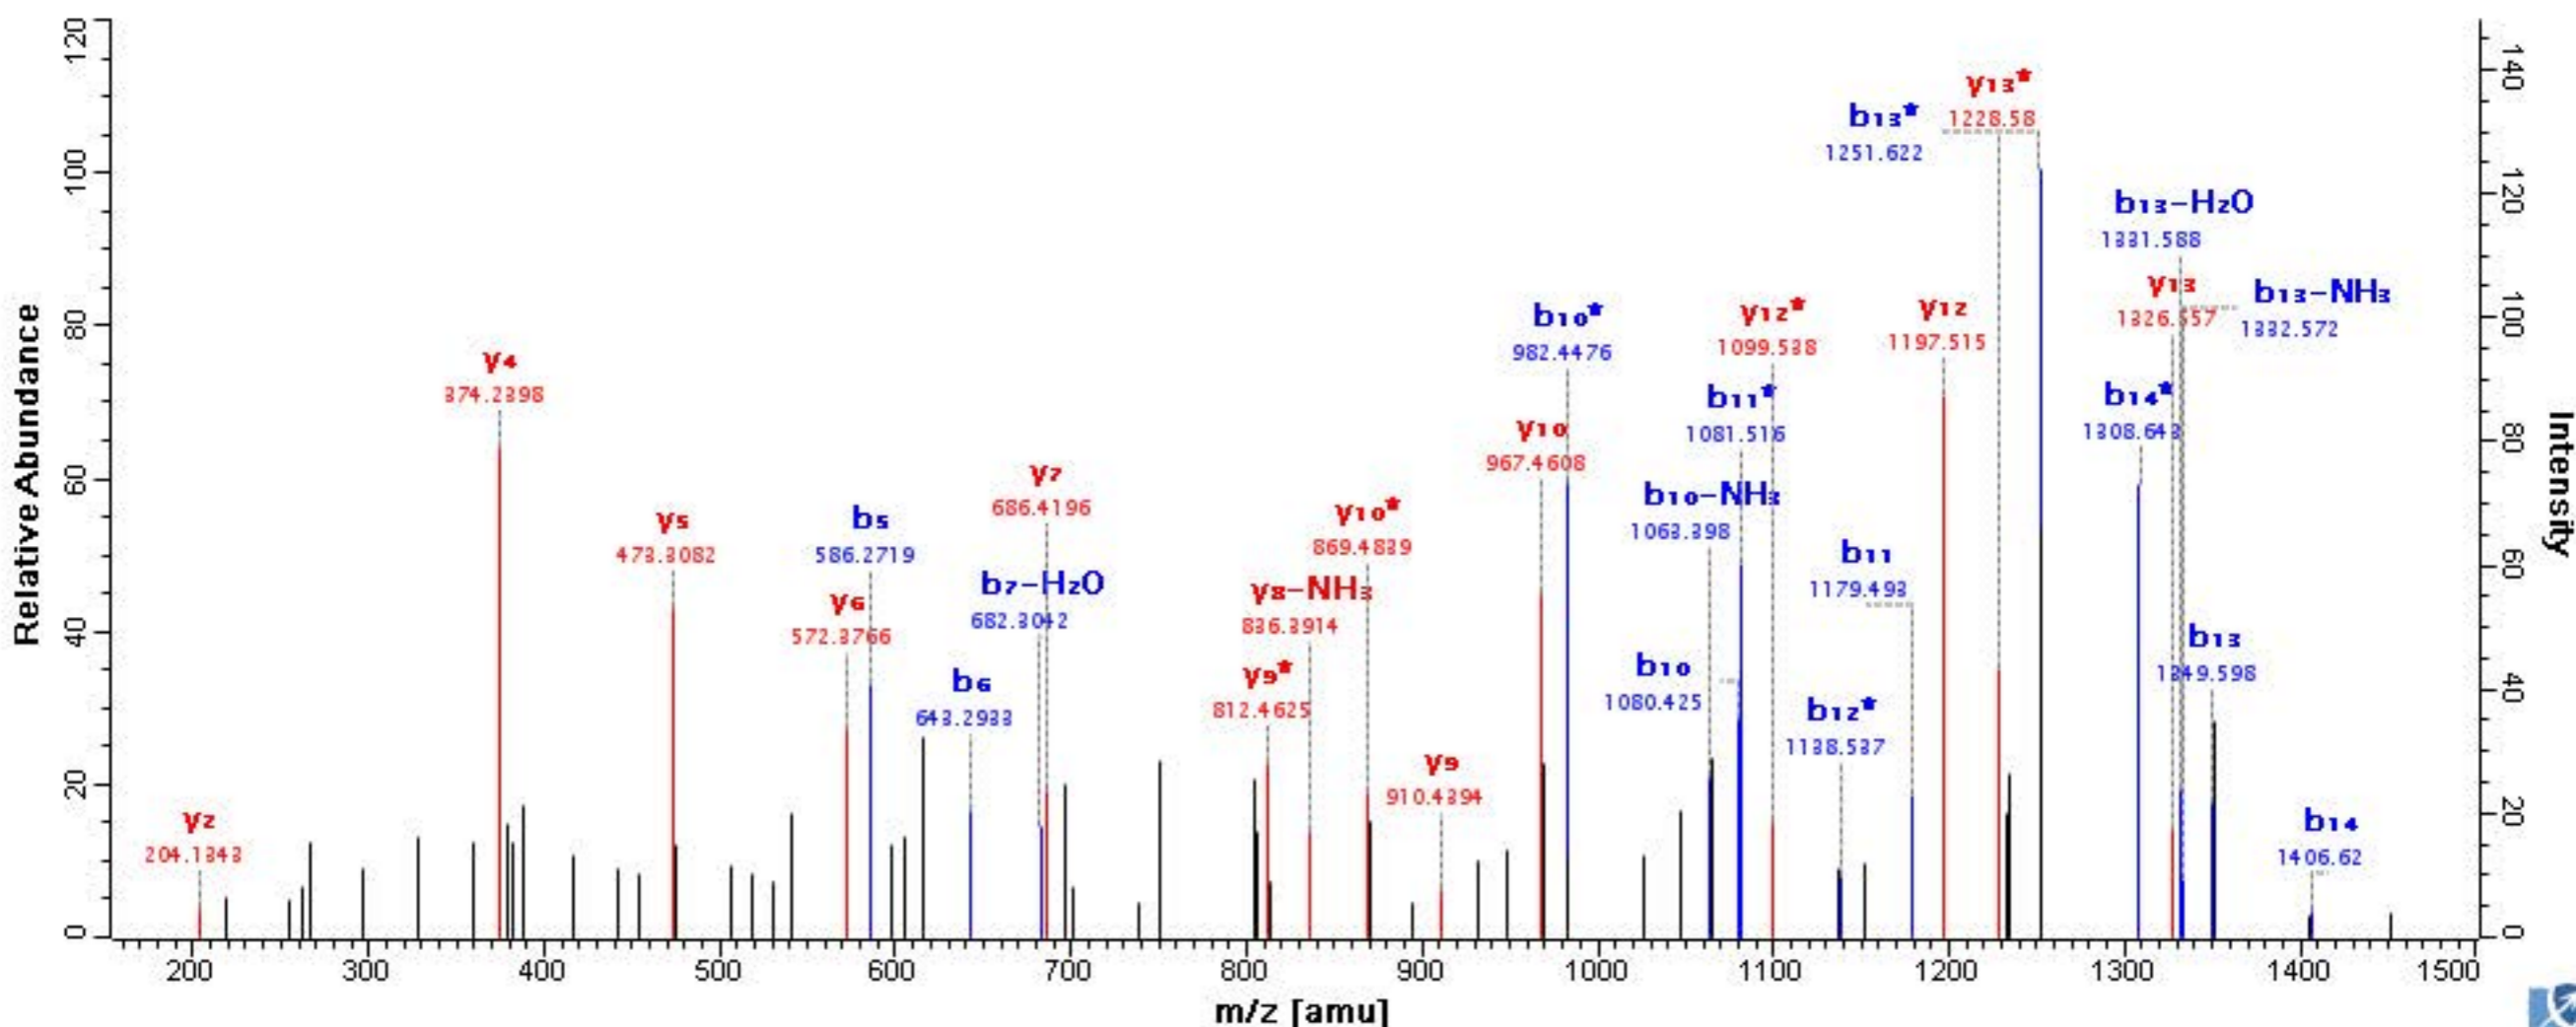

#### precursor information

|                   |                     |
|-------------------|---------------------|
| Mass:             | 1551.71817          |
| m/z:              | System.Collections. |
| Charge:           | System.Collections. |
| Retentiontime:    | System.Collections. |
| Score:            | 142.4528            |
| Mass Error [ppm]: | -0.0011177          |
| PEP:              | 1.8158E-23          |
| Precursor Type:   | MULTI               |

#### general information

|                       |           |
|-----------------------|-----------|
| Annotation:           | 12 of 15  |
| AminoAcids Coverage:  | 80 %      |
| Intensity Coverage:   | 58 %      |
| Protein Localisation: | 77 ... 91 |

| b ion      |                | seq |   |    |                | gamma ion  |      |
|------------|----------------|-----|---|----|----------------|------------|------|
| Δ dalton   | mass           |     |   |    |                | Δ dalton   | mass |
|            | 114.091340447  | 1   | I | 14 |                |            |      |
|            | 227.175404427  | 2   | I | 13 | 1439.641380284 |            |      |
|            | 356.217997524  | 3   | E | 12 | 1326.557316304 | +0.0931964 |      |
|            | 471.244940556  | 4   | D | 11 | 1197.514723207 | +0.1146713 |      |
| +0.0128454 | 586.271883588  | 5   | D | 10 | 1082.487780175 |            |      |
| +0.0289793 | 643.293347311  | 6   | G | 9  | 967.460837143  | +0.0647976 |      |
|            | 700.314811035  | 7   | G | 8  | 910.43937342   | +0.0042301 |      |
|            | 867.313169853  | 8   | S | 7  | 853.417909696  |            |      |
|            | 981.3560973    | 9   | N | 6  | 686.419550878  | -0.0585279 |      |
| -0.1907466 | 1080.424511216 | 10  | V | 5  | 572.376623431  | -0.000952  |      |
| +0.1087594 | 1179.492925133 | 11  | V | 4  | 473.308209514  | +0.0736264 |      |
|            | 1236.514388856 | 12  | G | 3  | 374.239795598  | +0.0941277 |      |
| -0.0609773 | 1349.598452837 | 13  | I | 2  | 317.218331875  |            |      |
| -0.2025582 | 1406.61991656  | 14  | G | 1  | 204.134267894  | +0.2205905 |      |
|            |                | 15  | K | 0  | 147.112804171  |            |      |

Source: 20130210\_VR\_Bsu\_TripleSILAC\_pWTPPrkCPrpCReplicate3\_FD3  
 Scannumber: 8808  
 Protein: BSU37120; fba; fba1; fbaA; tsr  
 Peptide Score: 69.73  
 Method: ITMS; CID; 3

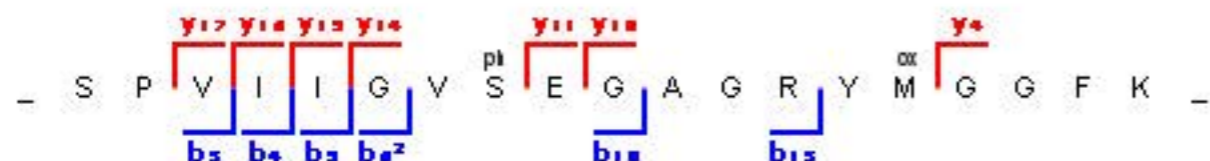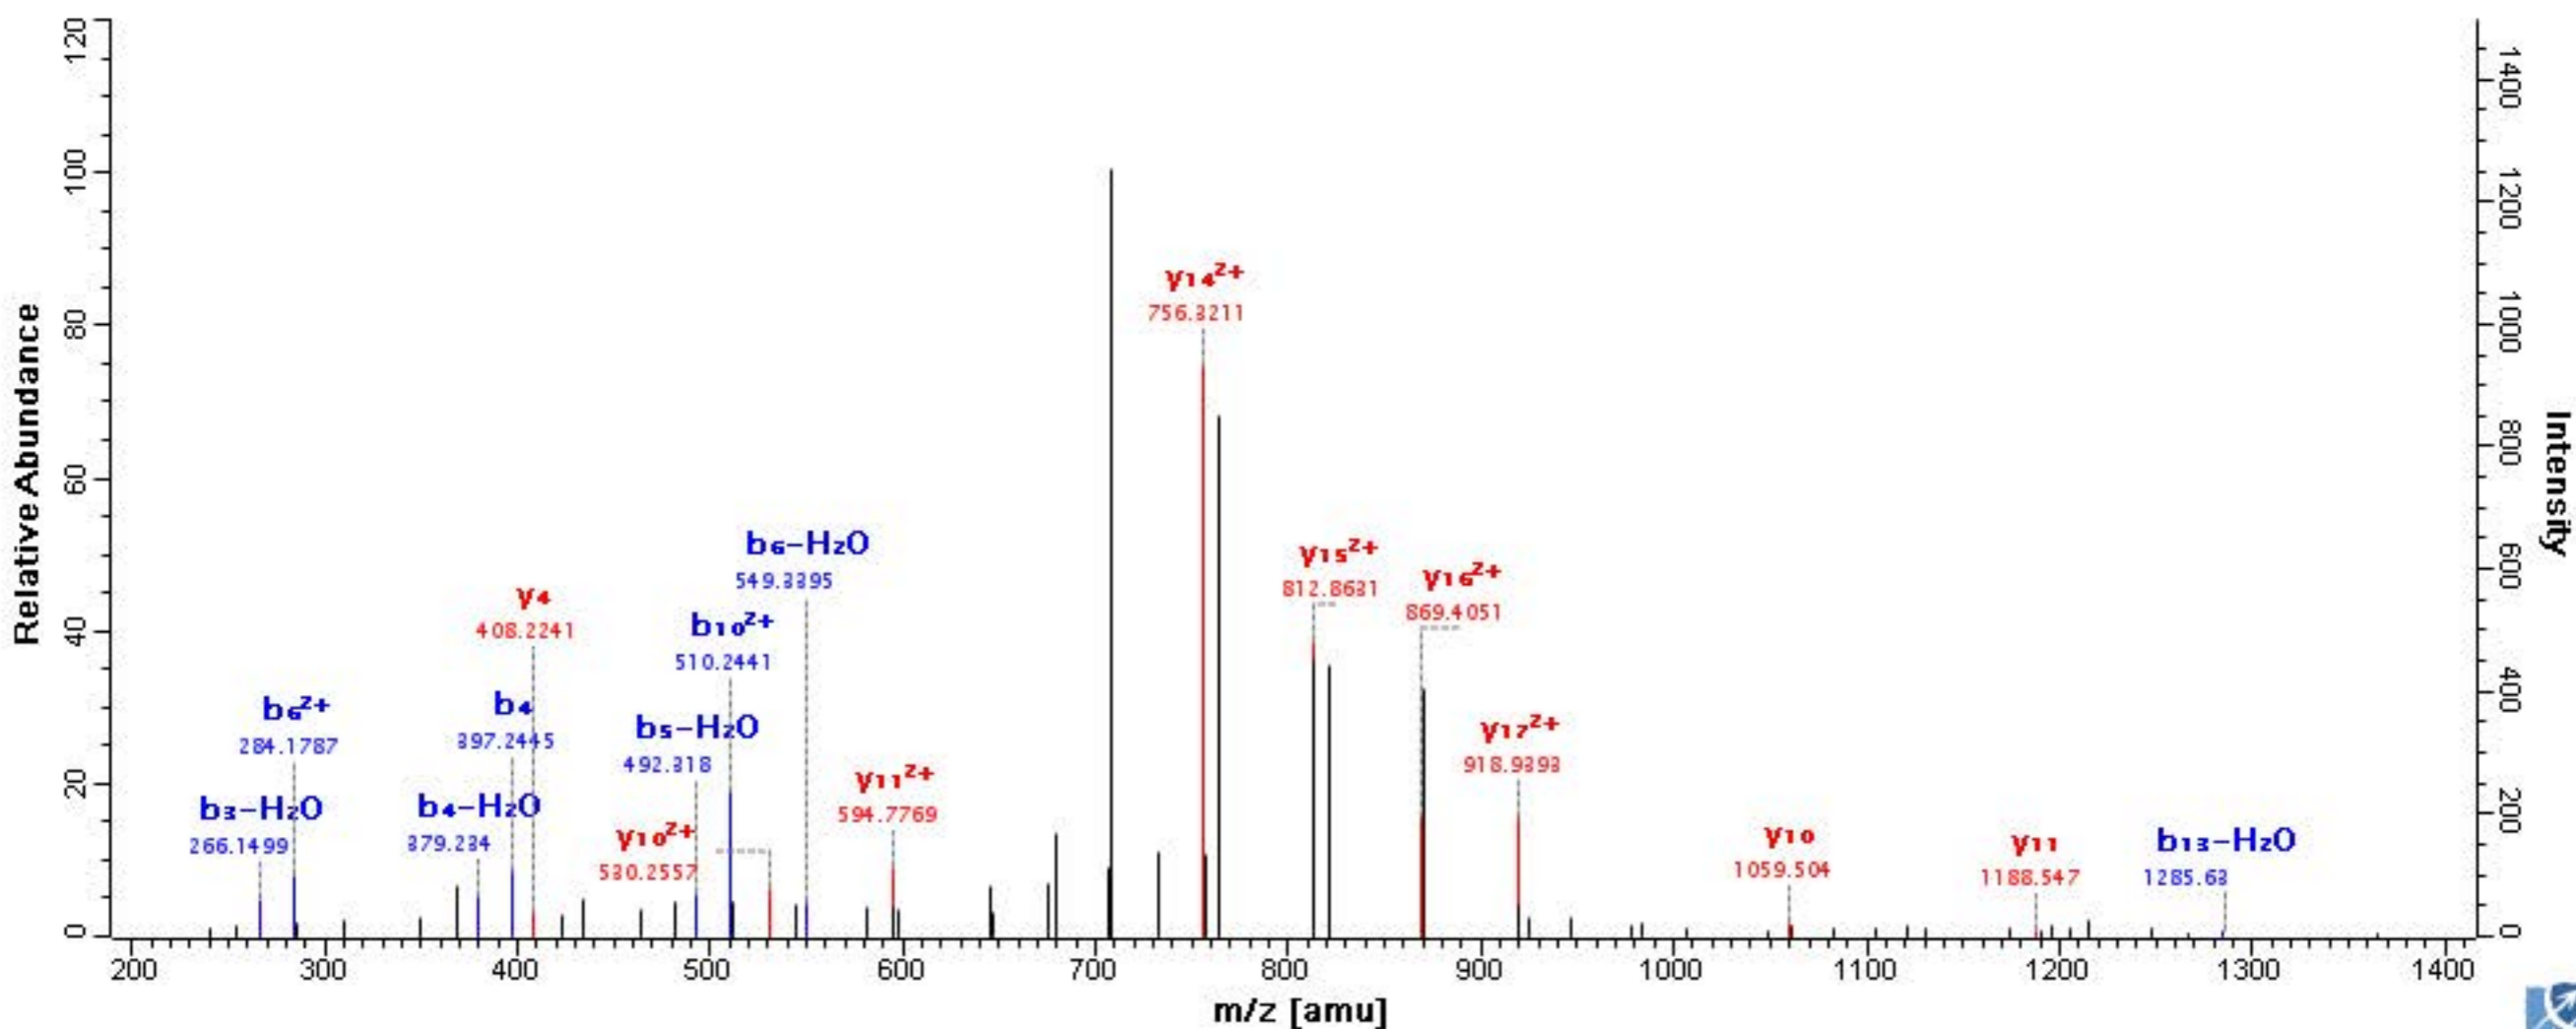

#### precursor information

|                   |                     |
|-------------------|---------------------|
| Mass:             | 2019.94998          |
| m/z:              | System.Collections. |
| Charge:           | System.Collections. |
| Retentiontime:    | System.Collections. |
| Score:            | 69.72889            |
| Mass Error [ppm]: | 0.53029             |
| PEP:              | 0.0014252           |
| Precursor Type:   | MULTI               |

| b <sup>2+</sup> ion |          | b ion    |          | seq |   | y ion    |          | y <sup>2+</sup> ion |          |
|---------------------|----------|----------|----------|-----|---|----------|----------|---------------------|----------|
| Δ dalton            | mass     | Δ dalton | mass     |     |   | Δ dalton | mass     | Δ dalton            | mass     |
|                     | 88.0393  |          | 88.0393  | 1   | S | 18       |          |                     |          |
|                     | 185.0921 |          | 185.0921 | 2   | P | 17       | 1933.924 |                     | 1933.924 |
|                     | 284.1605 |          | 284.1605 | 3   | V | 16       | 1836.871 |                     | 918.9393 |
|                     | 397.2445 | -0.01481 | 397.2445 | 4   | I | 15       | 1737.803 |                     | 869.4051 |
|                     | 510.3286 |          | 510.3286 | 5   | I | 14       | 1624.719 |                     | 812.8631 |
| +0.096776           | 284.1787 |          | 567.3501 | 6   | G | 13       | 1511.635 |                     | 756.3211 |
|                     | 666.4185 |          | 666.4185 | 7   | V | 12       | 1454.613 |                     | 1454.613 |
|                     | 833.4168 |          | 833.4168 | 8   | S | 11       | 1355.545 |                     | 1355.545 |
|                     | 962.4594 |          | 962.4594 | 9   | E | 10       | 1188.547 | -0.376697           | 594.7769 |
| -0.088939           | 510.2441 |          | 1019.481 | 10  | G | 9        | 1059.504 | -0.017942           | 530.2557 |
|                     | 1090.518 |          | 1090.518 | 11  | A | 8        | 1002.483 |                     | 1002.483 |
|                     | 1147.539 |          | 1147.539 | 12  | G | 7        | 931.4454 |                     | 931.4454 |
|                     | 1303.641 |          | 1303.641 | 13  | R | 6        | 874.424  |                     | 874.424  |
|                     | 1466.704 |          | 1466.704 | 14  | Y | 5        | 718.3229 |                     | 718.3229 |
|                     | 1613.739 |          | 1613.739 | 15  | M | 4        | 555.2595 |                     | 555.2595 |
|                     | 1670.761 |          | 1670.761 | 16  | G | 3        | 408.2241 | +0.029578           | 408.2241 |
|                     | 1727.782 |          | 1727.782 | 17  | G | 2        | 351.2027 |                     | 351.2027 |
|                     | 1874.851 |          | 1874.851 | 18  | F | 1        | 294.1812 |                     | 294.1812 |
|                     |          |          |          | 19  | K | 0        | 147.1128 |                     | 147.1128 |

#### general information

|                       |           |
|-----------------------|-----------|
| Annotation:           | 8 of 19   |
| AminoAcids Coverag    | 42 %      |
| Intensity Coverage:   | 33 %      |
| Protein Localisation: | 43 ... 61 |

Source: 20130210\_VR\_Bsu\_TripleSILAC\_pWTPPrkCPrpCReplicate3\_F05  
 Scannumber: 8117  
 Protein: BSU16090; sucC  
 Peptide Score: 145.29  
 Method: ITMS; CID; 3

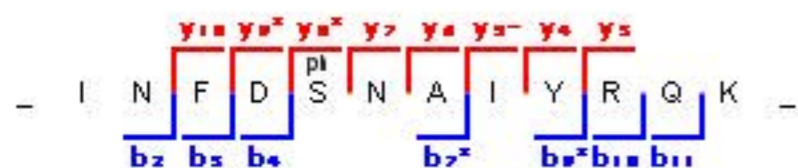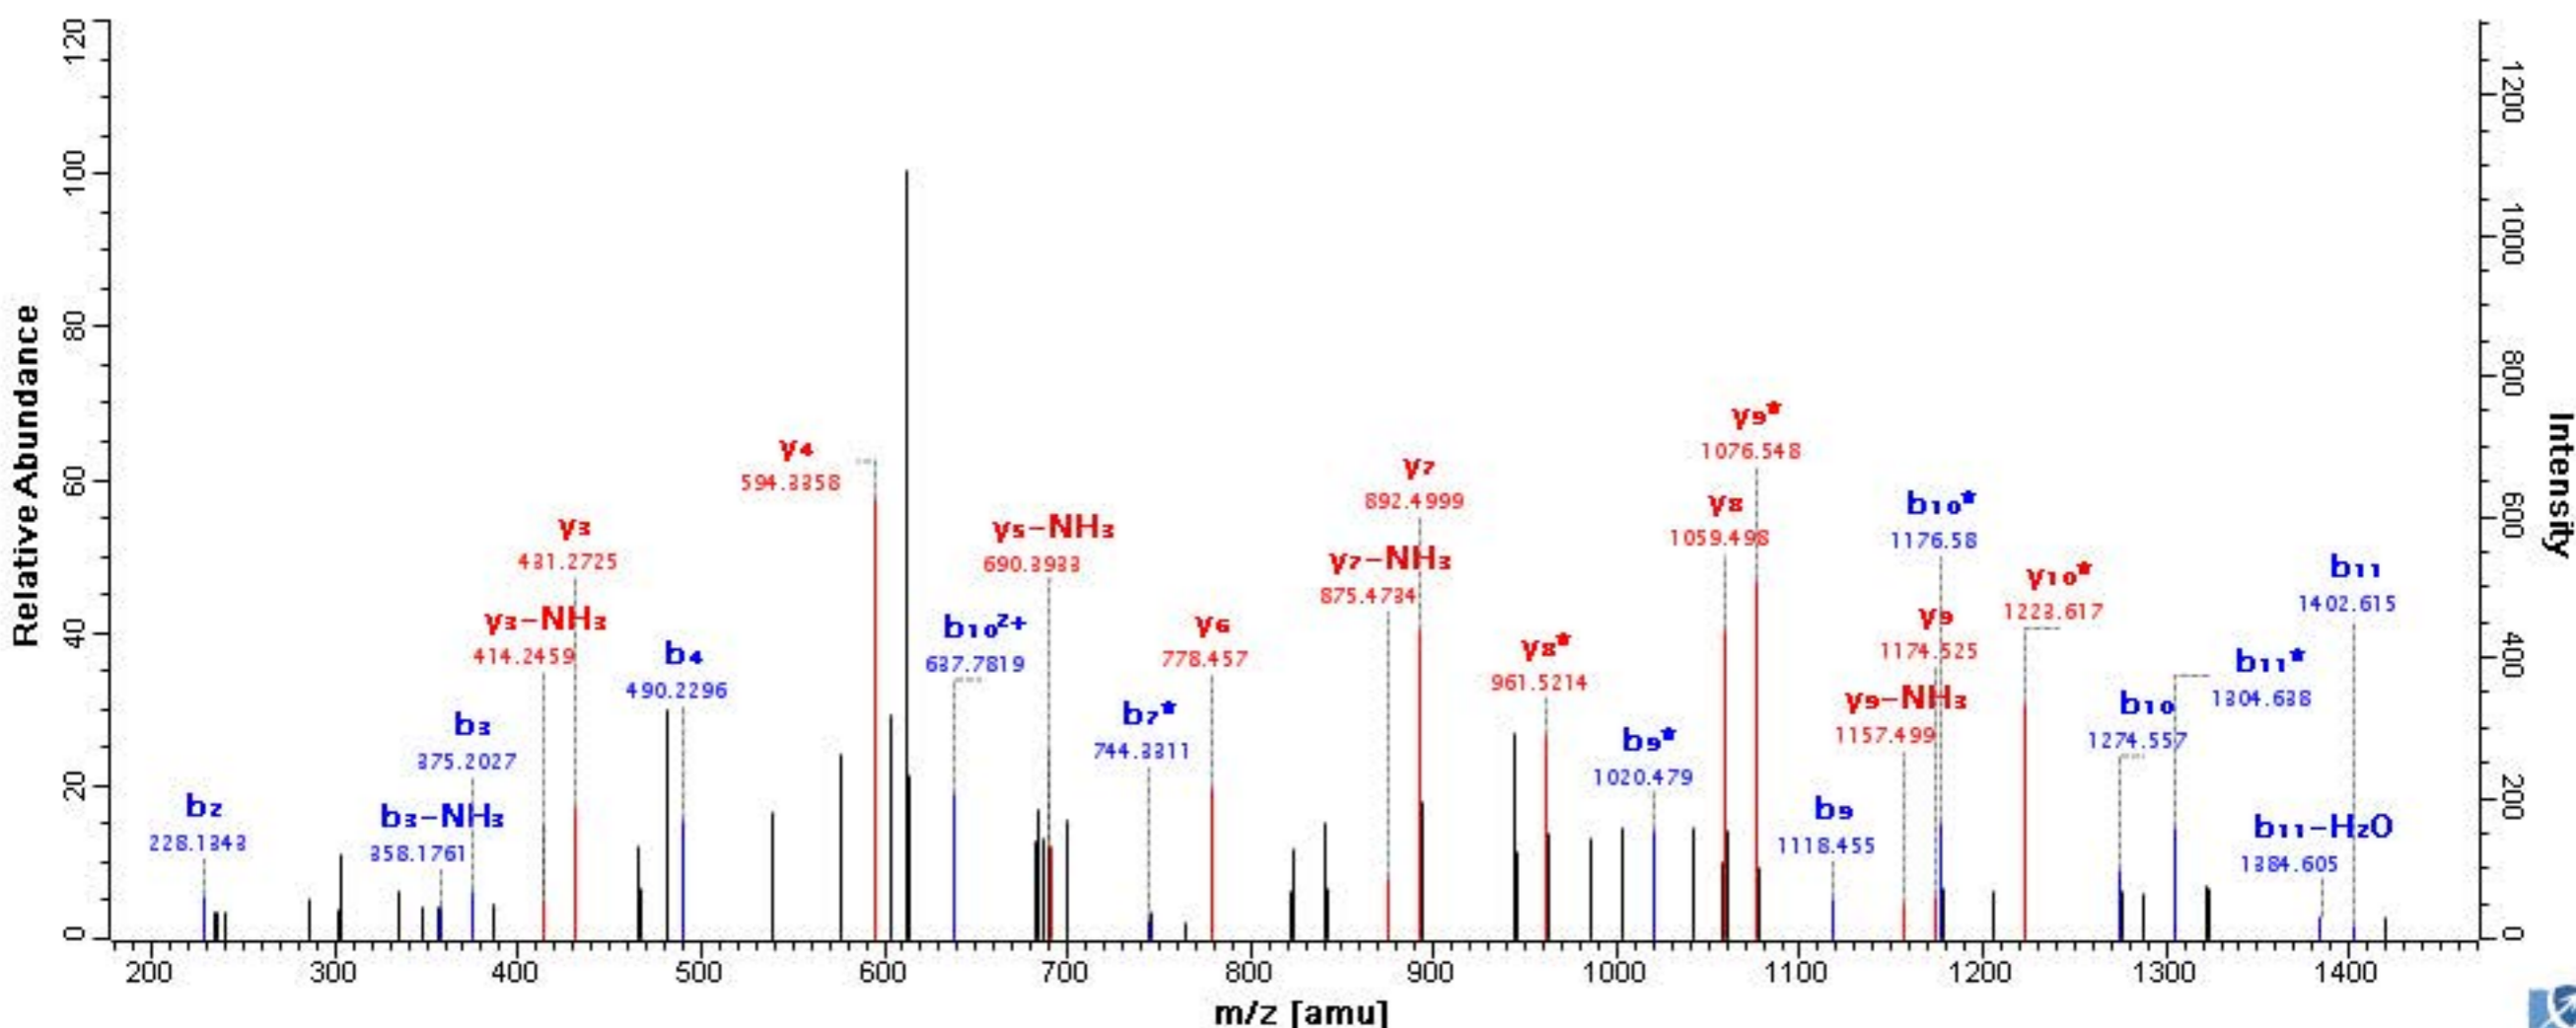

#### precursor information

|                   |                     |
|-------------------|---------------------|
| Mass:             | 1547.71324          |
| m/z:              | System.Collections. |
| Charge:           | System.Collections. |
| Retentiontime:    | System.Collections. |
| Score:            | 145.2936            |
| Mass Error [ppm]: | -0.076532           |
| PEP:              | 3.8379E-17          |
| Precursor Type:   | MULTI               |

#### general information

|                       |             |
|-----------------------|-------------|
| Annotation:           | 10 of 12    |
| AminoAcids Coverag    | 83 %        |
| Intensity Coverage:   | 40 %        |
| Protein Localisation: | 216 ... 227 |

| b <sup>2+</sup> ion |              | b ion      |              |     | y ion |          |              |            |
|---------------------|--------------|------------|--------------|-----|-------|----------|--------------|------------|
| Δ dalton            | mass         | Δ dalton   | mass         | seq |       | Δ dalton | mass         |            |
|                     | 114.09134045 |            | 114.09134045 | 1   | I     | 11       |              |            |
|                     | 228.13426789 | +0.0841464 | 228.13426789 | 2   | N     | 10       | 1435.6365697 |            |
|                     | 375.20268181 | +0.0274818 | 375.20268181 | 3   | F     | 9        | 1321.5936422 |            |
|                     | 490.22962484 | -0.1181136 | 490.22962484 | 4   | D     | 8        | 1174.5252283 | +0.1046545 |
|                     | 657.22798366 |            | 657.22798366 | 5   | S     | 7        | 1059.4982853 | -0.0212345 |
|                     | 771.27091111 |            | 771.27091111 | 6   | N     | 6        | 892.49992646 | -0.1979855 |
|                     | 842.3080249  |            | 842.3080249  | 7   | A     | 5        | 778.45699902 | -0.078459  |
|                     | 955.39208888 |            | 955.39208888 | 8   | I     | 4        | 707.41988523 |            |
|                     | 1118.4554174 | +0.1415064 | 1118.4554174 | 9   | Y     | 3        | 594.33582125 | +0.1071109 |
| +0.1850775          | 637.78190245 | +0.0214745 | 1274.5565284 | 10  | R     | 2        | 431.27249271 | -0.0831006 |
|                     | 1402.615106  | -0.122186  | 1402.615106  | 11  | Q     | 1        | 275.17138168 |            |
|                     |              |            |              | 12  | K     | 0        | 147.11280417 |            |

Source: 20130210\_VR\_Bsu\_TripleSILAC\_pWTPPrkCPrpCReplicate3\_F07  
 Scannumber: 13360  
 Protein: BSU23070; serA  
 Peptide Score: 46.51  
 Method: ITMS; CID; 3

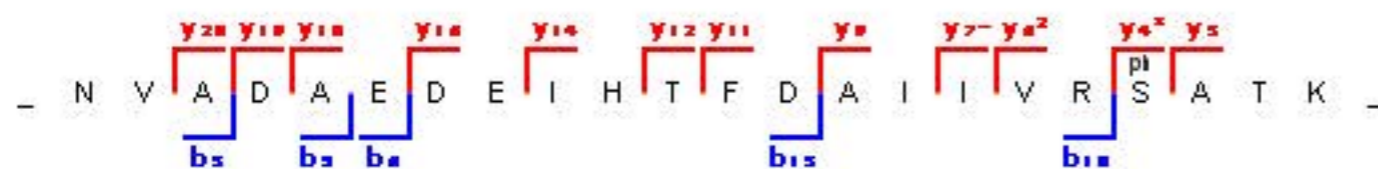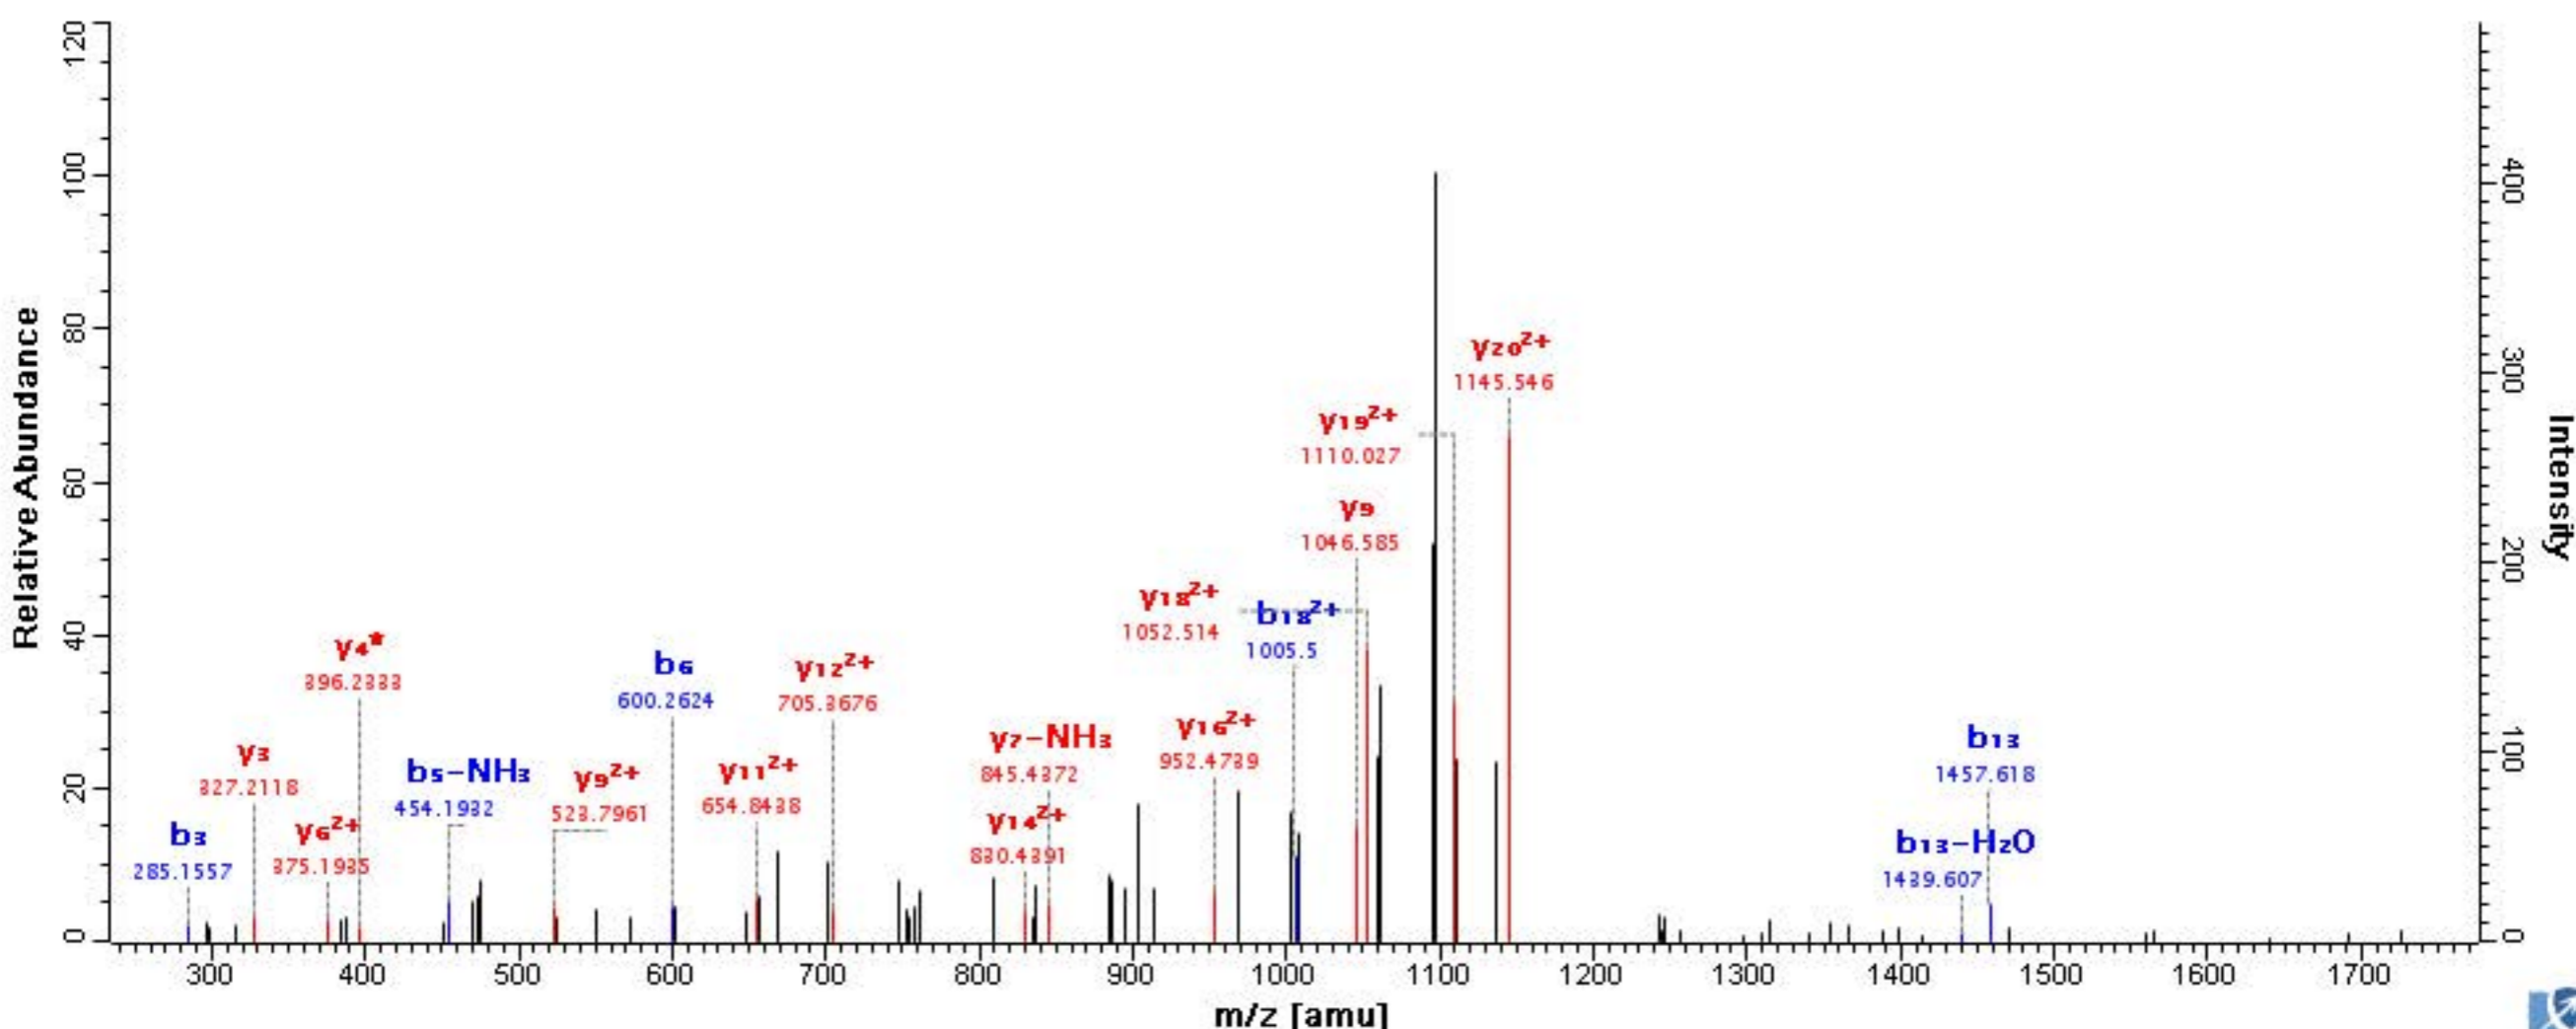

#### precursor information

|                   |                     |
|-------------------|---------------------|
| Mass:             | 2494.17369          |
| m/z:              | System.Collections. |
| Charge:           | System.Collections. |
| Retentiontime:    | System.Collections. |
| Score:            | 46.5141             |
| Mass Error [ppm]: | -0.16248            |
| PEP:              | 0.071551            |
| Precursor Type:   | MULTI               |

| b <sup>2+</sup> ion |          | b ion     |          |     | γ ion |          | γ <sup>2+</sup> ion |           |                    |
|---------------------|----------|-----------|----------|-----|-------|----------|---------------------|-----------|--------------------|
| Δ dalton            | mass     | Δ dalton  | mass     | seq |       | Δ dalton | mass                | Δ dalton  | mass               |
|                     | 115.0502 |           | 115.0502 | 1   | N     | 21       |                     |           |                    |
|                     | 214.1186 |           | 214.1186 | 2   | V     | 20       | 2389.153            |           | 2389.153           |
|                     | 285.1557 | -0.013855 | 285.1557 | 3   | A     | 19       | 2290.084            |           | 1145.546 +0.223411 |
|                     | 400.1827 |           | 400.1827 | 4   | D     | 18       | 2219.047            |           | 1110.027 -0.236914 |
|                     | 471.2198 |           | 471.2198 | 5   | A     | 17       | 2104.02             |           | 1052.514 +0.108955 |
|                     | 600.2624 | +0.071603 | 600.2624 | 6   | E     | 16       | 2032.983            |           | 2032.983           |
|                     | 715.2893 |           | 715.2893 | 7   | D     | 15       | 1903.94             |           | 952.4739 +0.427678 |
|                     | 844.3319 |           | 844.3319 | 8   | E     | 14       | 1788.914            |           | 1788.914           |
|                     | 957.416  |           | 957.416  | 9   | I     | 13       | 1659.871            |           | 830.4391 -0.253008 |
|                     | 1094.475 |           | 1094.475 | 10  | H     | 12       | 1546.787            |           | 1546.787           |
|                     | 1195.523 |           | 1195.523 | 11  | T     | 11       | 1409.728            |           | 705.3676 +0.091063 |
|                     | 1342.591 |           | 1342.591 | 12  | F     | 10       | 1308.68             |           | 654.8438 +0.245639 |
|                     | 1457.618 | +0.386954 | 1457.618 | 13  | D     | 9        | 1161.612            |           | 1161.612           |
|                     | 1528.655 |           | 1528.655 | 14  | A     | 8        | 1046.585            | -0.038046 | 523.7961 -0.013018 |
|                     | 1641.739 |           | 1641.739 | 15  | I     | 7        | 975.5478            |           | 975.5478           |
|                     | 1754.823 |           | 1754.823 | 16  | I     | 6        | 862.4637            |           | 862.4637           |
|                     | 1853.892 |           | 1853.892 | 17  | V     | 5        | 749.3797            |           | 375.1935 -0.097469 |
| +0.271193           | 1005.5   |           | 2009.993 | 18  | R     | 4        | 650.3113            |           | 650.3113           |
|                     | 2176.991 |           | 2176.991 | 19  | S     | 3        | 494.2102            |           | 494.2102           |
|                     | 2248.028 |           | 2248.028 | 20  | A     | 2        | 327.2118            | +0.036587 | 327.2118           |
|                     | 2349.076 |           | 2349.076 | 21  | T     | 1        | 256.1747            |           | 256.1747           |
|                     |          |           |          | 22  | K     | 0        | 155.127             |           | 155.127            |

#### general information

|                       |           |
|-----------------------|-----------|
| Annotation:           | 15 of 22  |
| AminoAcids Coverag    | 68 %      |
| Intensity Coverage:   | 30 %      |
| Protein Localisation: | 30 ... 51 |

Source: 20130210\_VR\_Bsu\_TripleSILAC\_pWTPPrkCPrpCReplicate3\_F07  
 Scannumber: 3197  
 Protein: bioYB; BSU32030; yuiG  
 Peptide Score: 115.57  
 Method: ITMS; CID; 3

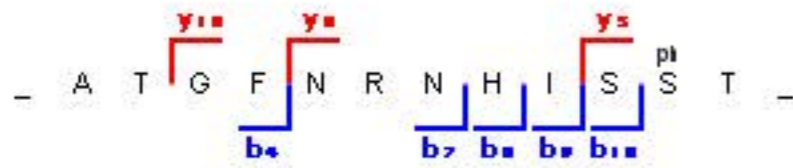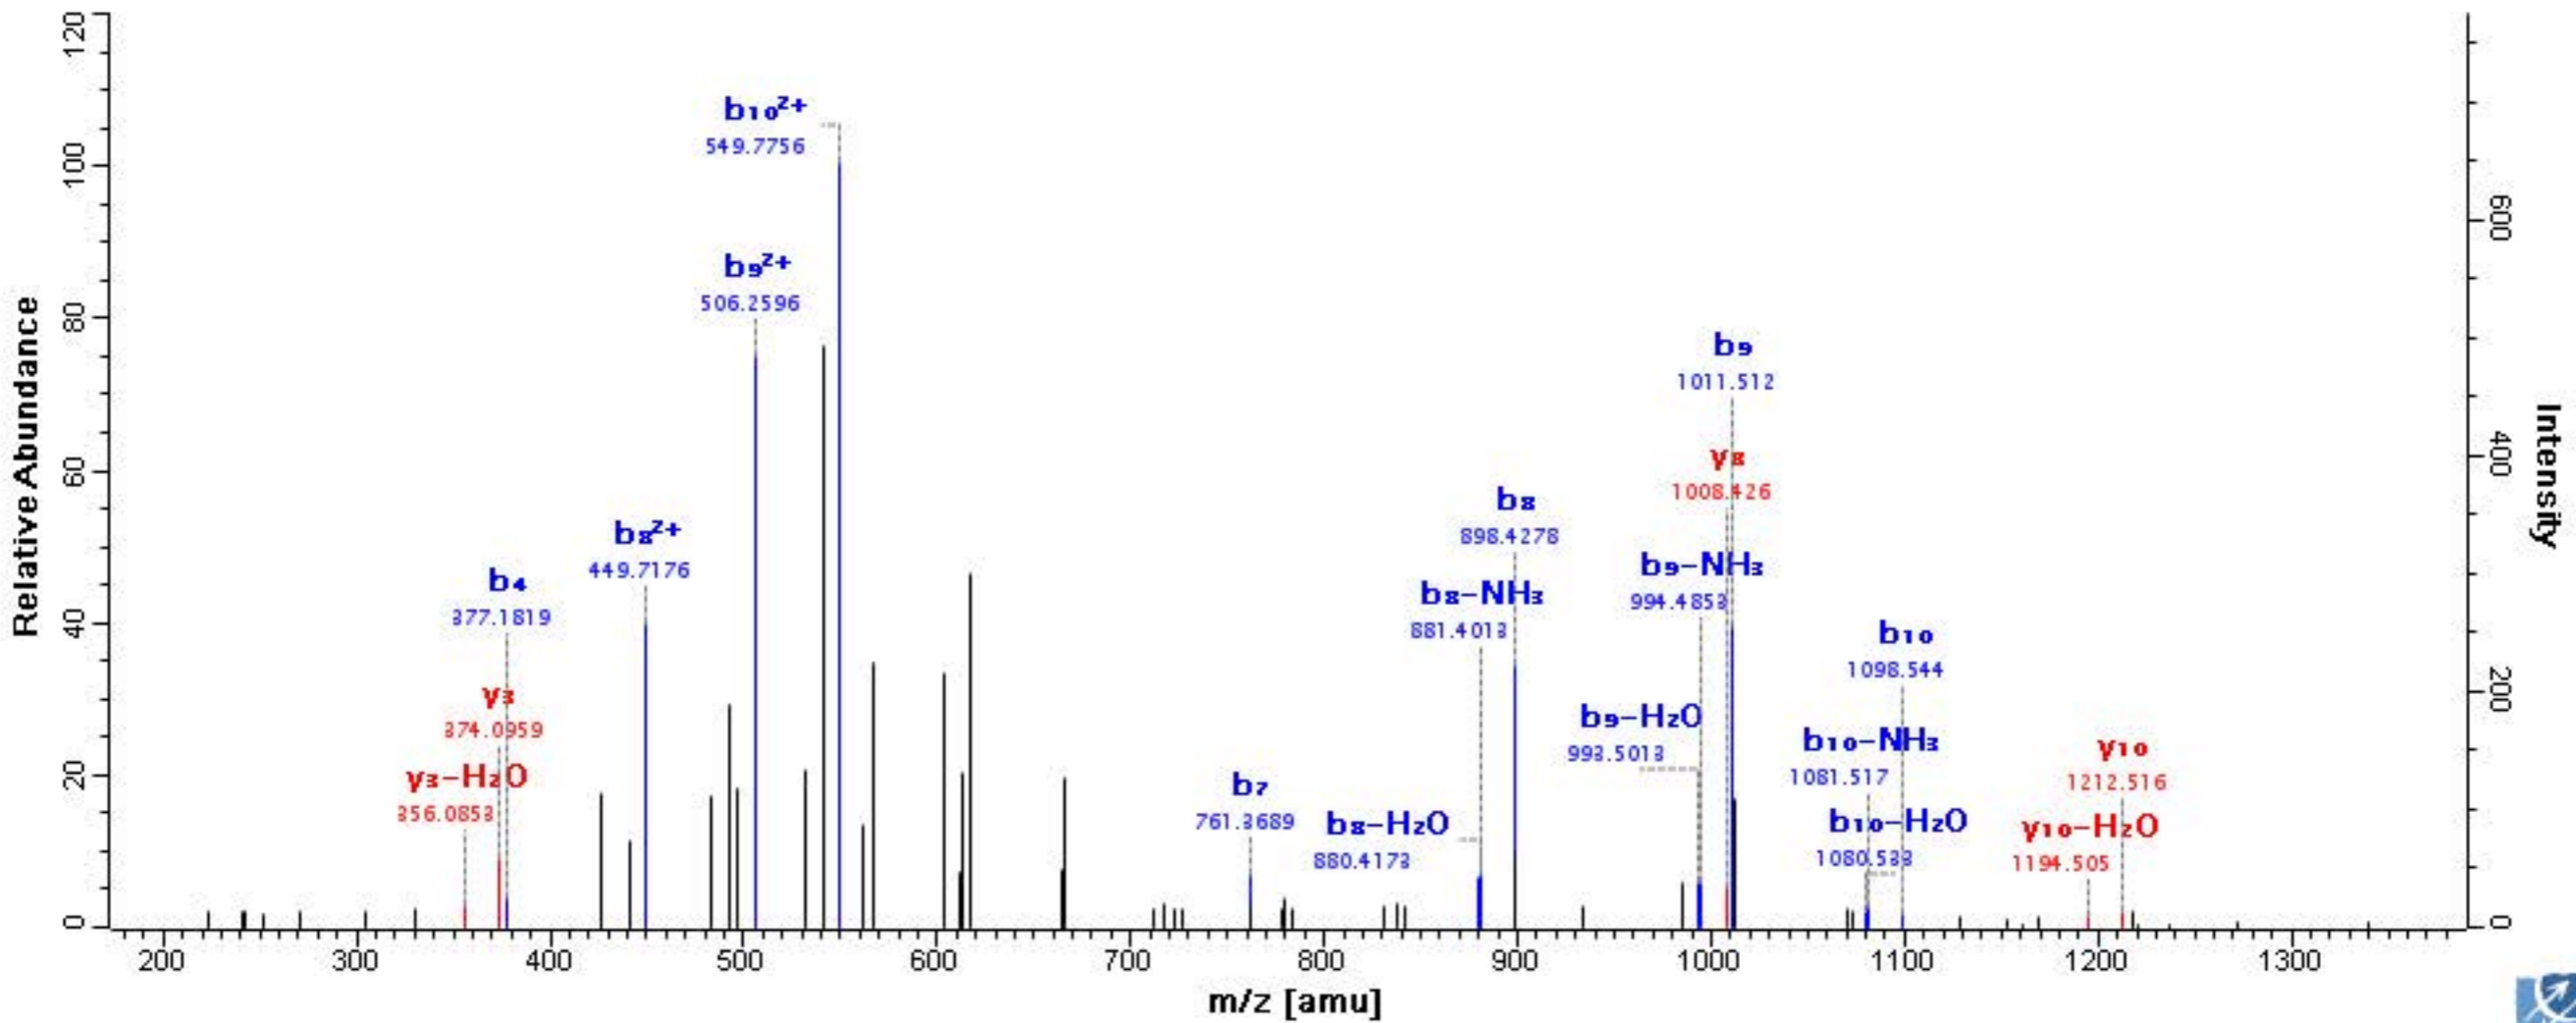

#### precursor information

|                   |                     |
|-------------------|---------------------|
| Mass:             | 1383.59257          |
| m/z:              | System.Collections. |
| Charge:           | System.Collections. |
| Retentiontime:    | System.Collections. |
| Score:            | 115.5738            |
| Mass Error [ppm]: | -0.48497            |
| PEP:              | 1.1879E-05          |
| Precursor Type:   | ISO                 |

#### general information

|                       |             |
|-----------------------|-------------|
| Annotation:           | 7 of 12     |
| AminoAcids Coverage:  | 58 %        |
| Intensity Coverage:   | 42 %        |
| Protein Localisation: | 189 ... 200 |

| b <sup>2+</sup> ion |              | b ion      |              |     | y ion |          |              |            |
|---------------------|--------------|------------|--------------|-----|-------|----------|--------------|------------|
| Δ dalton            | mass         | Δ dalton   | mass         | seq |       | Δ dalton | mass         |            |
|                     | 72.044390254 |            | 72.044390254 | 1   | A     | 11       |              |            |
|                     | 173.09206873 |            | 173.09206873 | 2   | T     | 10       | 1313.5634047 |            |
|                     | 230.11353245 |            | 230.11353245 | 3   | G     | 9        | 1212.5157263 | -0.2436315 |
|                     | 377.18194637 | -0.0978399 | 377.18194637 | 4   | F     | 8        | 1155.4942625 |            |
|                     | 491.22487382 |            | 491.22487382 | 5   | N     | 7        | 1008.4258486 | -0.320624  |
|                     | 647.32598484 |            | 647.32598484 | 6   | R     | 6        | 894.38292117 |            |
|                     | 761.36891229 | +0.0839075 | 761.36891229 | 7   | N     | 5        | 738.28181015 |            |
| +0.0967197          | 449.71755031 | -0.017912  | 898.42782415 | 8   | H     | 4        | 624.2388827  |            |
| +0.1416628          | 506.2595823  | -0.1766831 | 1011.5118881 | 9   | I     | 3        | 487.17997084 |            |
| +0.1380998          | 549.77559651 | -0.3210162 | 1098.5439165 | 10  | S     | 2        | 374.09590686 | +0.0918373 |
|                     | 1265.5422754 |            | 1265.5422754 | 11  | S     | 1        | 287.06387845 |            |
|                     |              |            |              | 12  | T     | 0        | 120.06551963 |            |



Source: 20130210\_VR\_Bsu\_TripleSILAC\_pWTPPrkCPrpCReplicate3\_F07  
 Scannumber: 3720  
 Protein: BSU29140; citA2; citZ  
 Peptide Score: 108.35  
 Method: ITMS; CID; 3

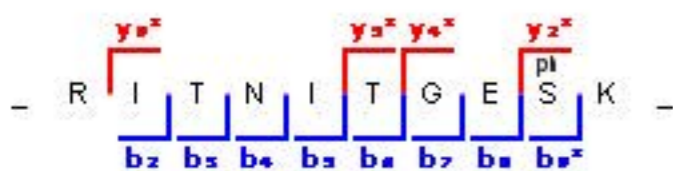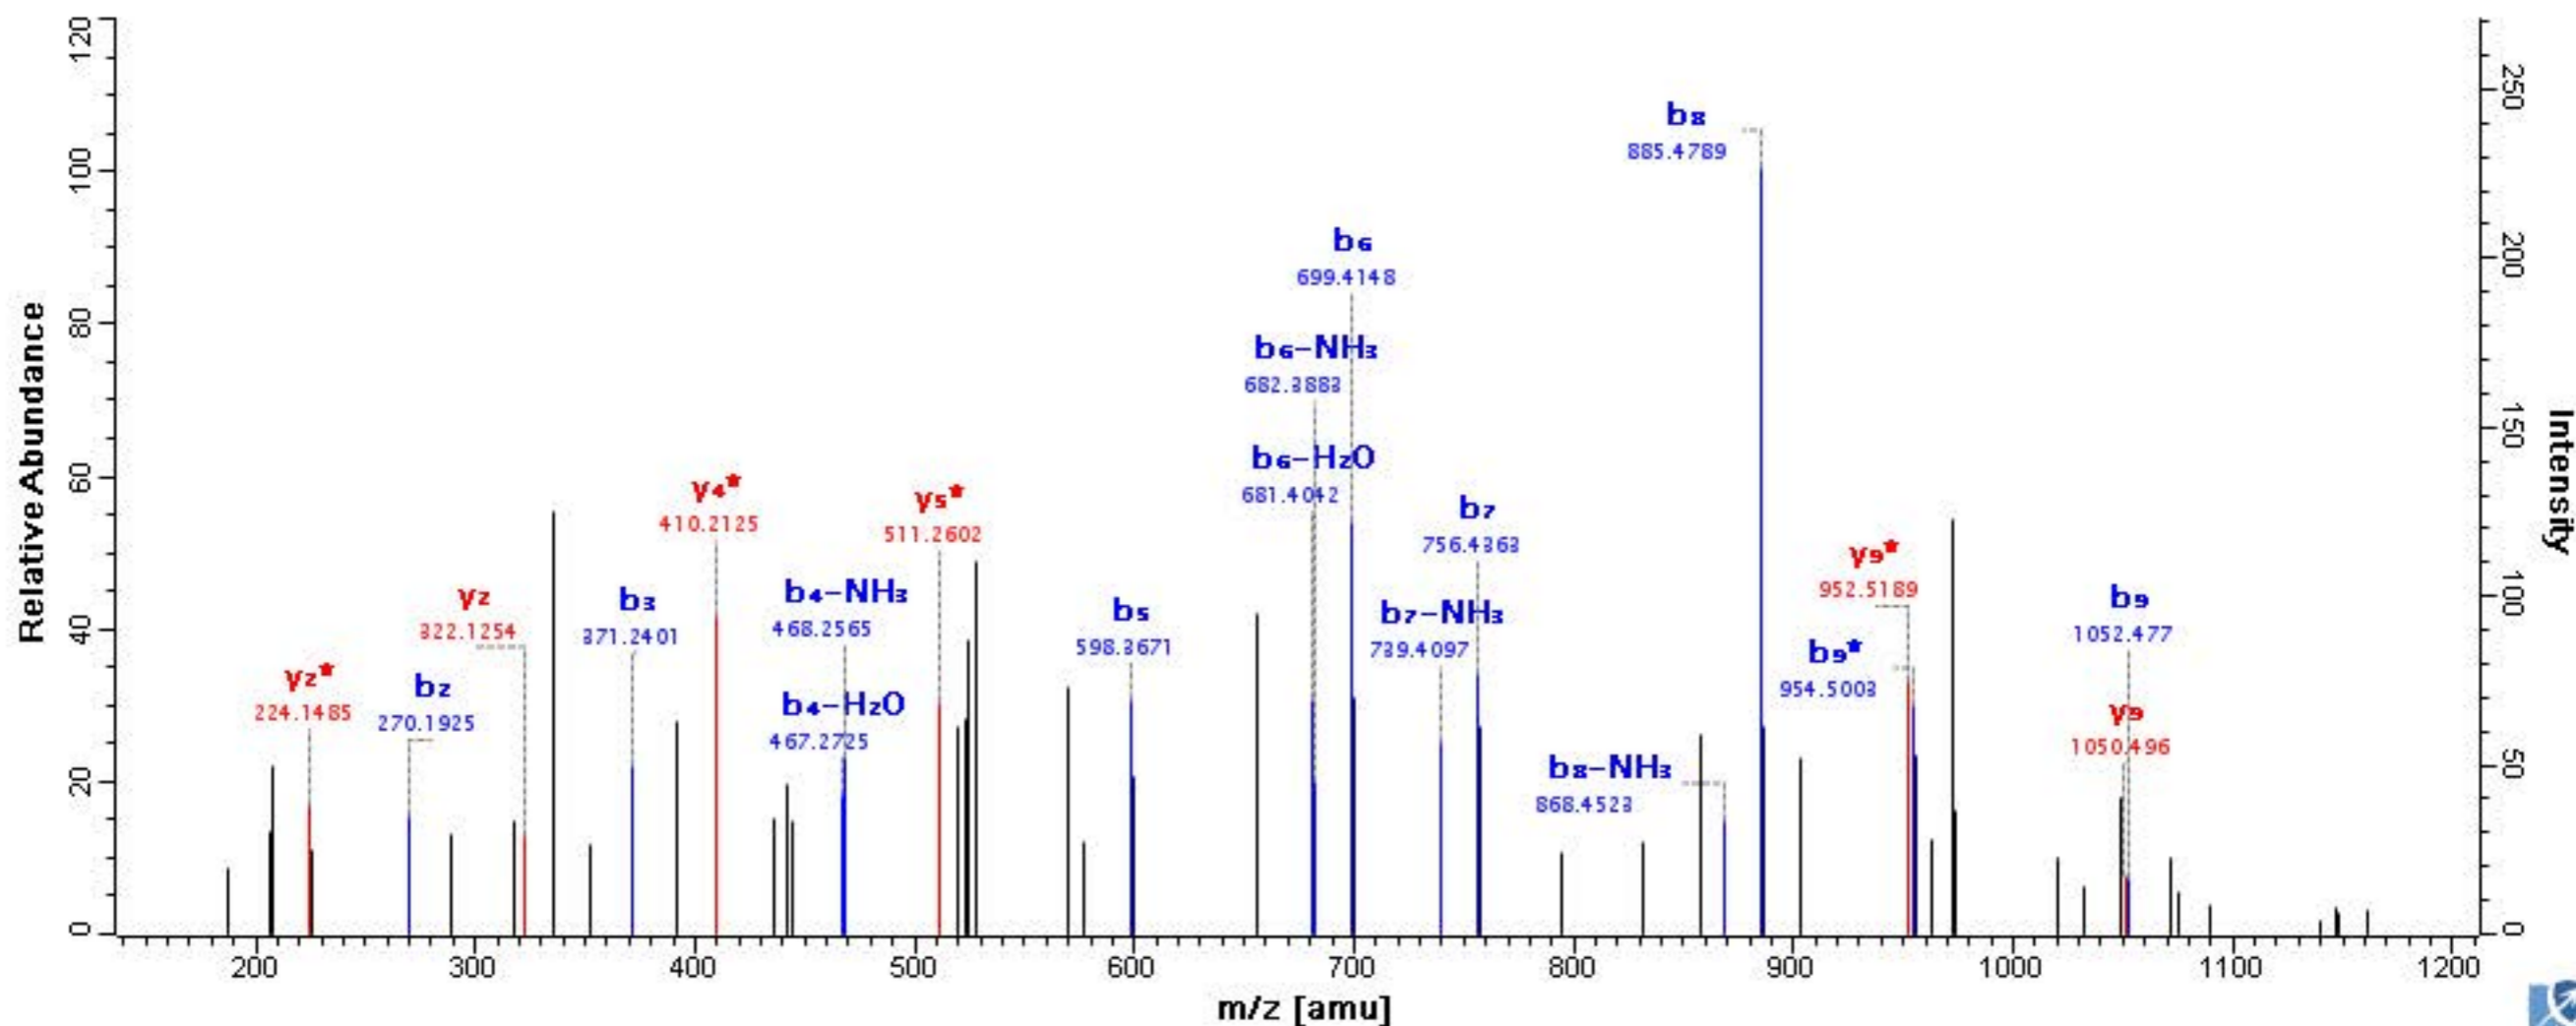

**precursor information**

|                   |                     |
|-------------------|---------------------|
| Mass:             | 1197.57481          |
| m/z:              | System.Collections. |
| Charge:           | System.Collections. |
| Retentiontime:    | System.Collections. |
| Score:            | 108.3483            |
| Mass Error [ppm]: | -0.5428             |
| PEP:              | 0.09038             |
| Precursor Type:   | MULTI               |

**general information**

|                       |             |
|-----------------------|-------------|
| Annotation:           | 8 of 10     |
| AminoAcids Coverage:  | 80 %        |
| Intensity Coverage:   | 41 %        |
| Protein Localisation: | 276 ... 285 |

| b ion           |                |    |     |   | y ion           |            |
|-----------------|----------------|----|-----|---|-----------------|------------|
| $\Delta$ dalton | mass           |    | seq |   | $\Delta$ dalton | mass       |
|                 | 157.108387495  | 1  | R   | 9 |                 |            |
| -0.0594559      | 270.192451475  | 2  | I   | 8 | 1050.495830978  | +0.274921  |
| -0.290545       | 371.240129949  | 3  | T   | 7 | 937.411766998   |            |
|                 | 485.283057396  | 4  | N   | 6 | 836.364088524   |            |
| -0.2197215      | 598.367121377  | 5  | I   | 5 | 722.321161076   |            |
| -0.0555469      | 699.414799851  | 6  | T   | 4 | 609.237097096   |            |
| -0.0218959      | 756.436263575  | 7  | G   | 3 | 508.189418622   |            |
| -0.024572       | 885.478856671  | 8  | E   | 2 | 451.167954898   |            |
| -0.3096129      | 1052.477215489 | 9  | S   | 1 | 322.125361802   | -0.0393022 |
|                 |                | 10 | K   | 0 | 155.127002984   |            |

Source: 20130210\_VR\_Bsu\_TripleSILAC\_pWTPPrkCPrpCReplicate3\_F08  
 Scannumber: 10292  
 Protein: BSU09410; phoA; phoAIV  
 Peptide Score: 43.58  
 Method: ITMS; CID; 3

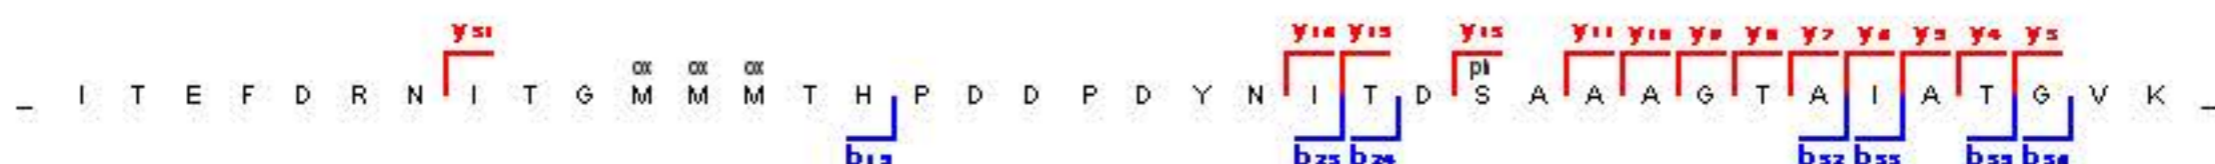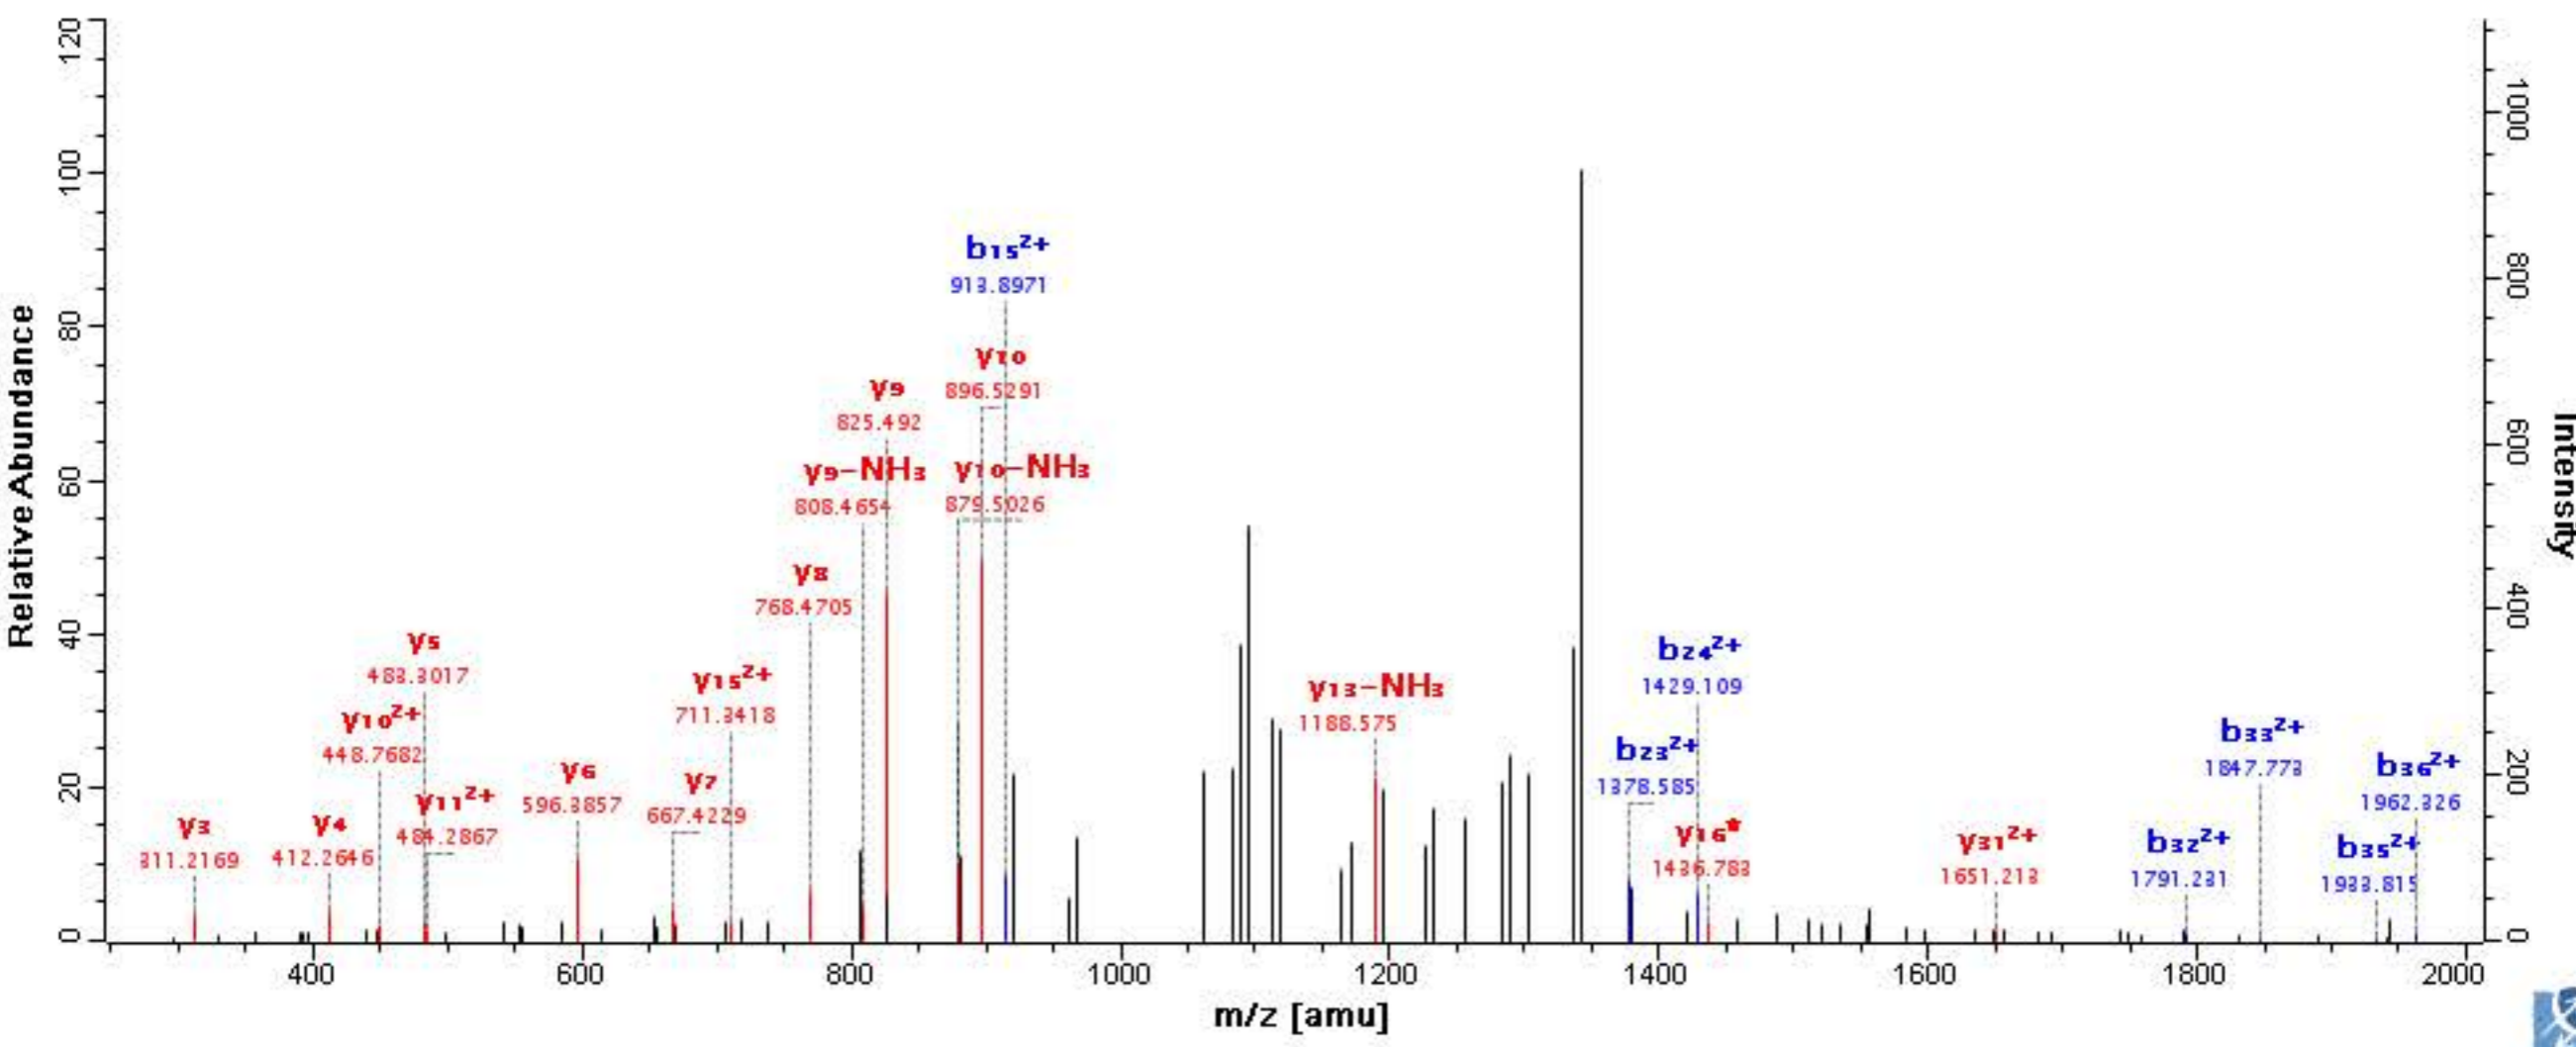

**precursor information**

|                   |                     |
|-------------------|---------------------|
| Mass:             | 4175.82478          |
| m/z:              | System.Collections. |
| Charge:           | System.Collections. |
| Retentiontime:    | System.Collections. |
| Score:            | 43.58282            |
| Mass Error [ppm]: | -0.15815            |
| PEP:              | 0.00024447          |
| Precursor Type:   | ISO                 |

| b <sup>2+</sup> ion |          | b ion    |          |     | γ ion |          | γ <sup>2+</sup> ion |           |                    |
|---------------------|----------|----------|----------|-----|-------|----------|---------------------|-----------|--------------------|
| Δ dalton            | mass     | Δ dalton | mass     | seq |       | Δ dalton | mass                | Δ dalton  | mass               |
|                     | 114.0913 |          | 114.0913 | 1   | I     | 37       |                     |           |                    |
|                     | 215.139  |          | 215.139  | 2   | T     | 36       | 4063.749            |           | 4063.749           |
|                     | 344.1816 |          | 344.1816 | 3   | E     | 35       | 3962.701            |           | 3962.701           |
|                     | 491.25   |          | 491.25   | 4   | F     | 34       | 3833.658            |           | 3833.658           |
|                     | 606.277  |          | 606.277  | 5   | D     | 33       | 3686.59             |           | 3686.59            |
|                     | 762.3781 |          | 762.3781 | 6   | R     | 32       | 3571.563            |           | 3571.563           |
|                     | 876.421  |          | 876.421  | 7   | N     | 31       | 3415.462            |           | 3415.462           |
|                     | 989.5051 |          | 989.5051 | 8   | I     | 30       | 3301.419            |           | 1651.213 +0.398441 |
|                     | 1090.553 |          | 1090.553 | 9   | T     | 29       | 3188.335            |           | 3188.335           |
|                     | 1147.574 |          | 1147.574 | 10  | G     | 28       | 3087.287            |           | 3087.287           |
|                     | 1294.61  |          | 1294.61  | 11  | M     | 27       | 3030.266            |           | 3030.266           |
|                     | 1441.645 |          | 1441.645 | 12  | M     | 26       | 2883.23             |           | 2883.23            |
|                     | 1588.68  |          | 1588.68  | 13  | M     | 25       | 2736.195            |           | 2736.195           |
|                     | 1689.728 |          | 1689.728 | 14  | T     | 24       | 2589.16             |           | 2589.16            |
| +0.342729           | 913.8971 |          | 1826.787 | 15  | H     | 23       | 2488.112            |           | 2488.112           |
|                     | 1923.84  |          | 1923.84  | 16  | P     | 22       | 2351.053            |           | 2351.053           |
|                     | 2038.867 |          | 2038.867 | 17  | D     | 21       | 2254                |           | 2254               |
|                     | 2153.894 |          | 2153.894 | 18  | D     | 20       | 2138.973            |           | 2138.973           |
|                     | 2250.946 |          | 2250.946 | 19  | P     | 19       | 2023.946            |           | 2023.946           |
|                     | 2365.973 |          | 2365.973 | 20  | D     | 18       | 1926.894            |           | 1926.894           |
|                     | 2529.037 |          | 2529.037 | 21  | Y     | 17       | 1811.867            |           | 1811.867           |
|                     | 2643.08  |          | 2643.08  | 22  | N     | 16       | 1648.803            |           | 1648.803           |
| +0.166842           | 1378.585 |          | 2756.164 | 23  | I     | 15       | 1534.76             |           | 1534.76            |
| -0.343936           | 1429.109 |          | 2857.211 | 24  | T     | 14       | 1421.676            |           | 711.3418 -0.036986 |
|                     | 2972.238 |          | 2972.238 | 25  | D     | 13       | 1320.629            |           | 1320.629           |
|                     | 3139.237 |          | 3139.237 | 26  | S     | 12       | 1205.602            |           | 1205.602           |
|                     | 3210.274 |          | 3210.274 | 27  | A     | 11       | 1038.603            |           | 1038.603           |
|                     | 3281.311 |          | 3281.311 | 28  | A     | 10       | 967.5662            |           | 484.2867 +0.040522 |
|                     | 3352.348 |          | 3352.348 | 29  | A     | 9        | 896.5291            | -0.077569 | 448.7682 -0.045474 |
|                     | 3409.369 |          | 3409.369 | 30  | G     | 8        | 825.492             | -0.173878 | 825.492            |
|                     | 3510.417 |          | 3510.417 | 31  | T     | 7        | 768.4705            | +0.102957 | 768.4705           |
| -0.139824           | 1791.231 |          | 3581.454 | 32  | A     | 6        | 667.4229            | -0.020873 | 667.4229           |
| -0.056246           | 1847.773 |          | 3694.538 | 33  | I     | 5        | 596.3857            | +0.068975 | 596.3857           |
|                     | 3765.575 |          | 3765.575 | 34  | A     | 4        | 483.3017            | -0.00373  | 483.3017           |
| -0.321786           | 1933.815 |          | 3866.623 | 35  | T     | 3        | 412.2646            | -0.057589 | 412.2646           |
| -0.417845           | 1962.326 |          | 3923.645 | 36  | G     | 2        | 311.2169            | +0.132179 | 311.2169           |
|                     | 4022.713 |          | 4022.713 | 37  | V     | 1        | 254.1954            |           | 254.1954           |
|                     |          |          |          | 38  | K     | 0        | 155.127             |           | 155.127            |

**general information**

|                       |            |
|-----------------------|------------|
| Annotation:           | 15 of 38   |
| AminoAcids Coverage:  | 39 %       |
| Intensity Coverage:   | 22 %       |
| Protein Localisation: | 83 ... 120 |

Source: 201 30210\_VR\_Bsu\_TripleSILAC\_pWTPPrkCPrpCReplicate3\_FD8  
 Scannumber: 7262  
 Protein: BSU35390; yviE  
 Peptide Score: 53.45  
 Method: ITMS; CID; 3

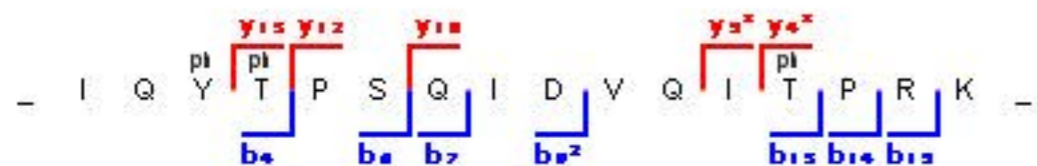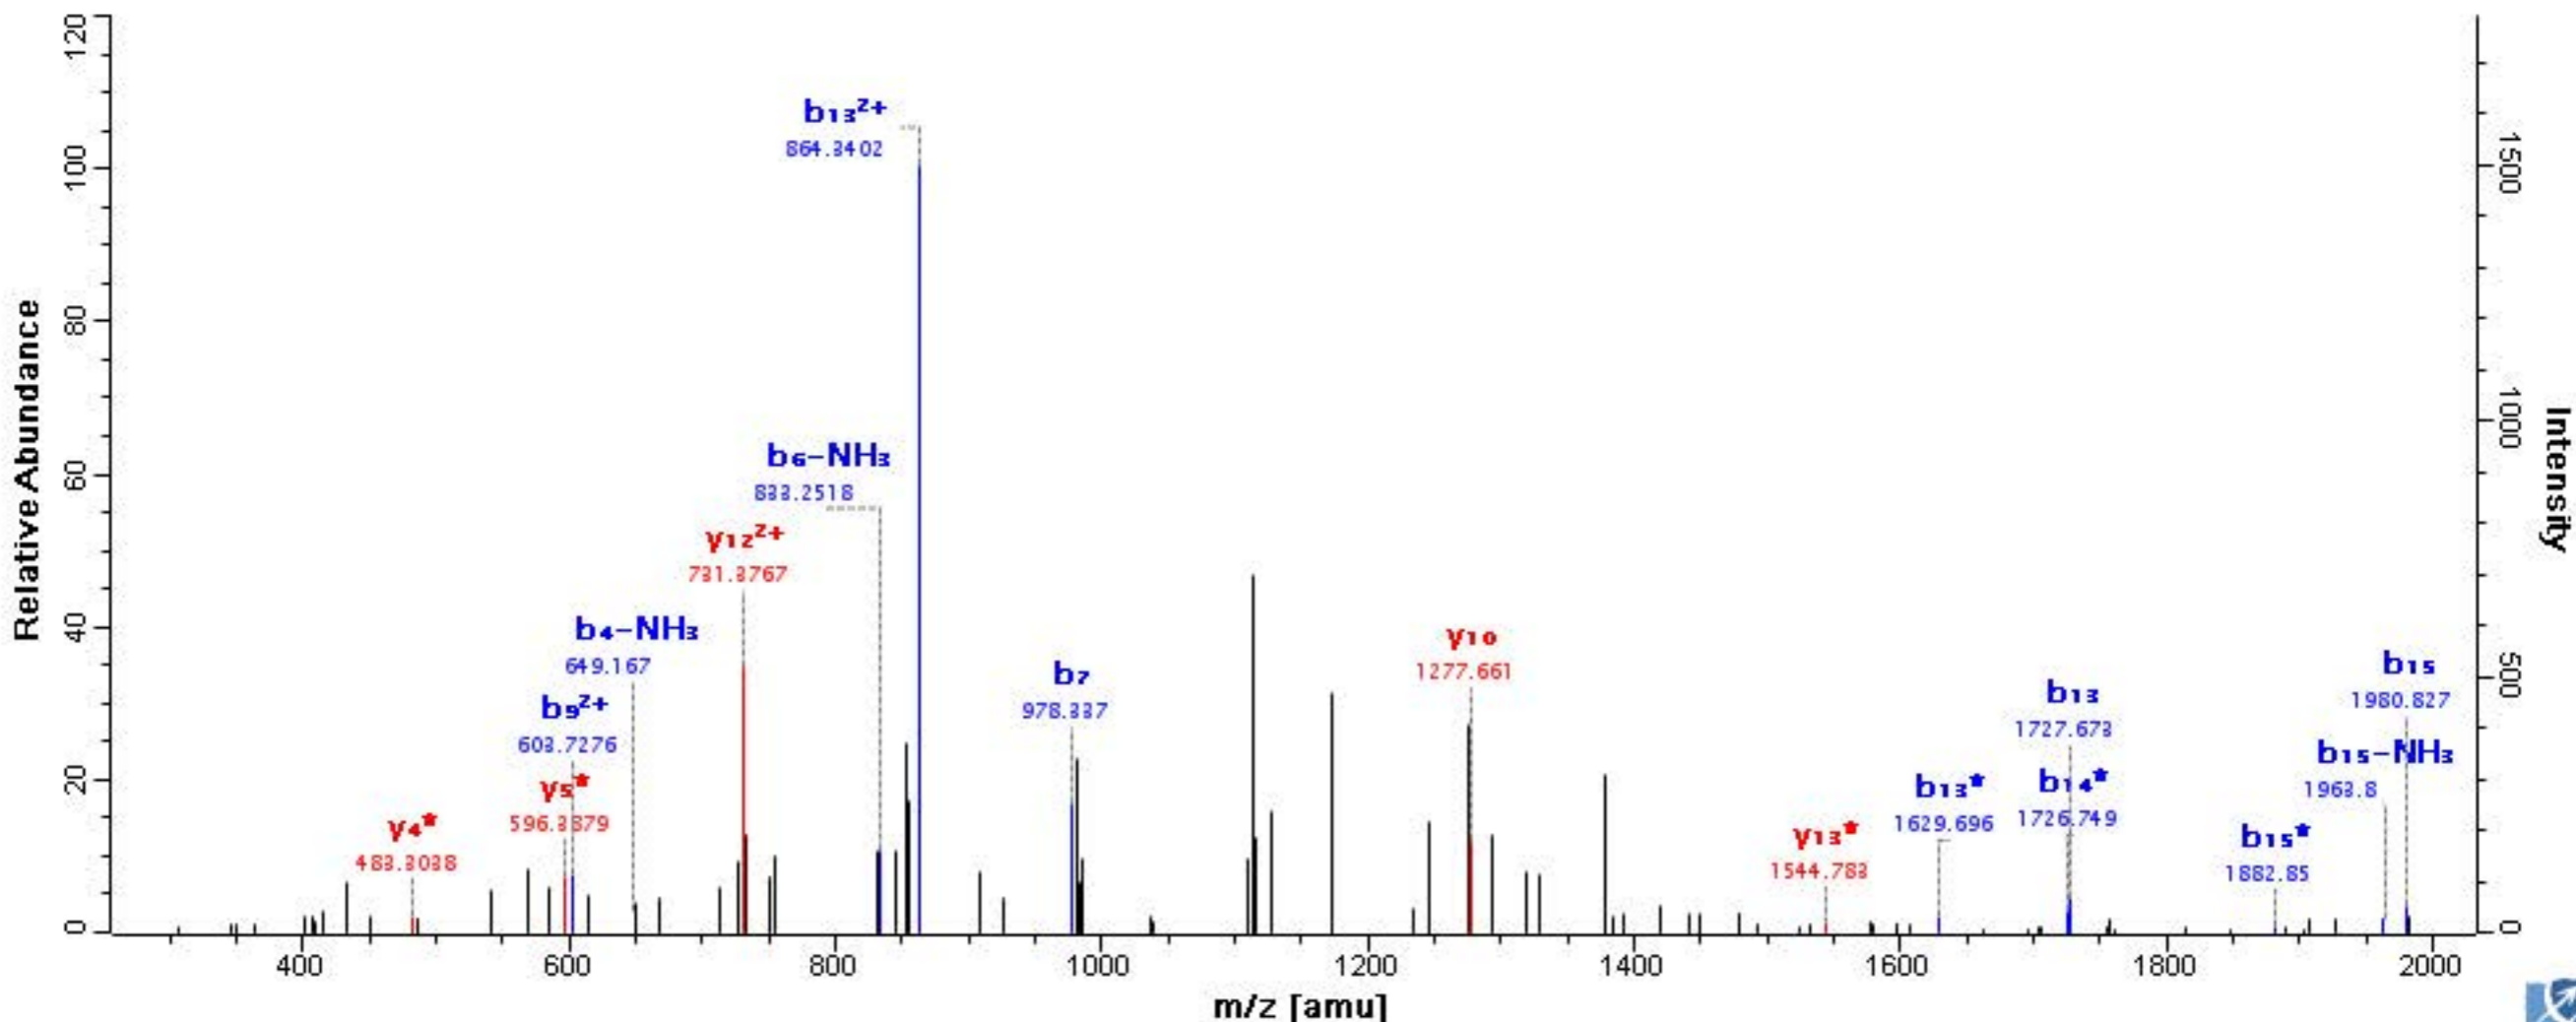

#### precursor information

|                   |                     |
|-------------------|---------------------|
| Mass:             | 2125.92618          |
| m/z:              | System.Collections. |
| Charge:           | System.Collections. |
| Retentiontime:    | System.Collections. |
| Score:            | 53.45319            |
| Mass Error [ppm]: | 0.4818              |
| PEP:              | 0.037286            |
| Precursor Type:   | MULTI               |

#### general information

|                       |             |
|-----------------------|-------------|
| Annotation:           | 9 of 16     |
| AminoAcids Coverag    | 56 %        |
| Intensity Coverage:   | 28 %        |
| Protein Localisation: | 134 ... 149 |

| b <sup>2+</sup> ion |          | b ion     |          |     | y ion |          | y <sup>2+</sup> ion |           |          |
|---------------------|----------|-----------|----------|-----|-------|----------|---------------------|-----------|----------|
| Δ dalton            | mass     | Δ dalton  | mass     | seq |       | Δ dalton | mass                | Δ dalton  | mass     |
|                     | 114.0913 |           | 114.0913 | 1   | I     | 15       |                     |           |          |
|                     | 242.1499 |           | 242.1499 | 2   | Q     | 14       | 2013.848            |           | 2013.848 |
|                     | 485.1796 |           | 485.1796 | 3   | Y     | 13       | 1885.79             |           | 1885.79  |
|                     | 666.1936 |           | 666.1936 | 4   | T     | 12       | 1642.76             |           | 1642.76  |
|                     | 763.2463 |           | 763.2463 | 5   | P     | 11       | 1461.746            |           | 731.3767 |
|                     | 850.2784 |           | 850.2784 | 6   | S     | 10       | 1364.693            |           | 1364.693 |
|                     | 978.337  | +0.113484 | 978.337  | 7   | Q     | 9        | 1277.661            | +0.010791 | 1277.661 |
|                     | 1091.421 |           | 1091.421 | 8   | I     | 8        | 1149.603            |           | 1149.603 |
| -0.470723           | 603.7276 |           | 1206.448 | 9   | D     | 7        | 1036.519            |           | 1036.519 |
|                     | 1305.516 |           | 1305.516 | 10  | V     | 6        | 921.4917            |           | 921.4917 |
|                     | 1433.575 |           | 1433.575 | 11  | Q     | 5        | 822.4233            |           | 822.4233 |
|                     | 1546.659 |           | 1546.659 | 12  | I     | 4        | 694.3648            |           | 694.3648 |
| -0.387149           | 864.3402 | +0.199288 | 1727.673 | 13  | T     | 3        | 581.2807            |           | 581.2807 |
|                     | 1824.726 |           | 1824.726 | 14  | P     | 2        | 400.2667            |           | 400.2667 |
|                     | 1980.827 | +0.288211 | 1980.827 | 15  | R     | 1        | 303.2139            |           | 303.2139 |
|                     |          |           |          | 16  | K     | 0        | 147.1128            |           | 147.1128 |

Source: 20130211\_VR\_Bsu\_TripleSILAC\_pWTPPrkCPrpCReplicate3\_F09  
 Scannumber: 3185  
 Protein: BSU38020; ipa-52r; pdxK; ywdB  
 Peptide Score: 103.34  
 Method: ITMS; CID; 3

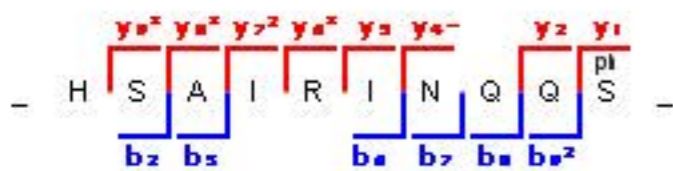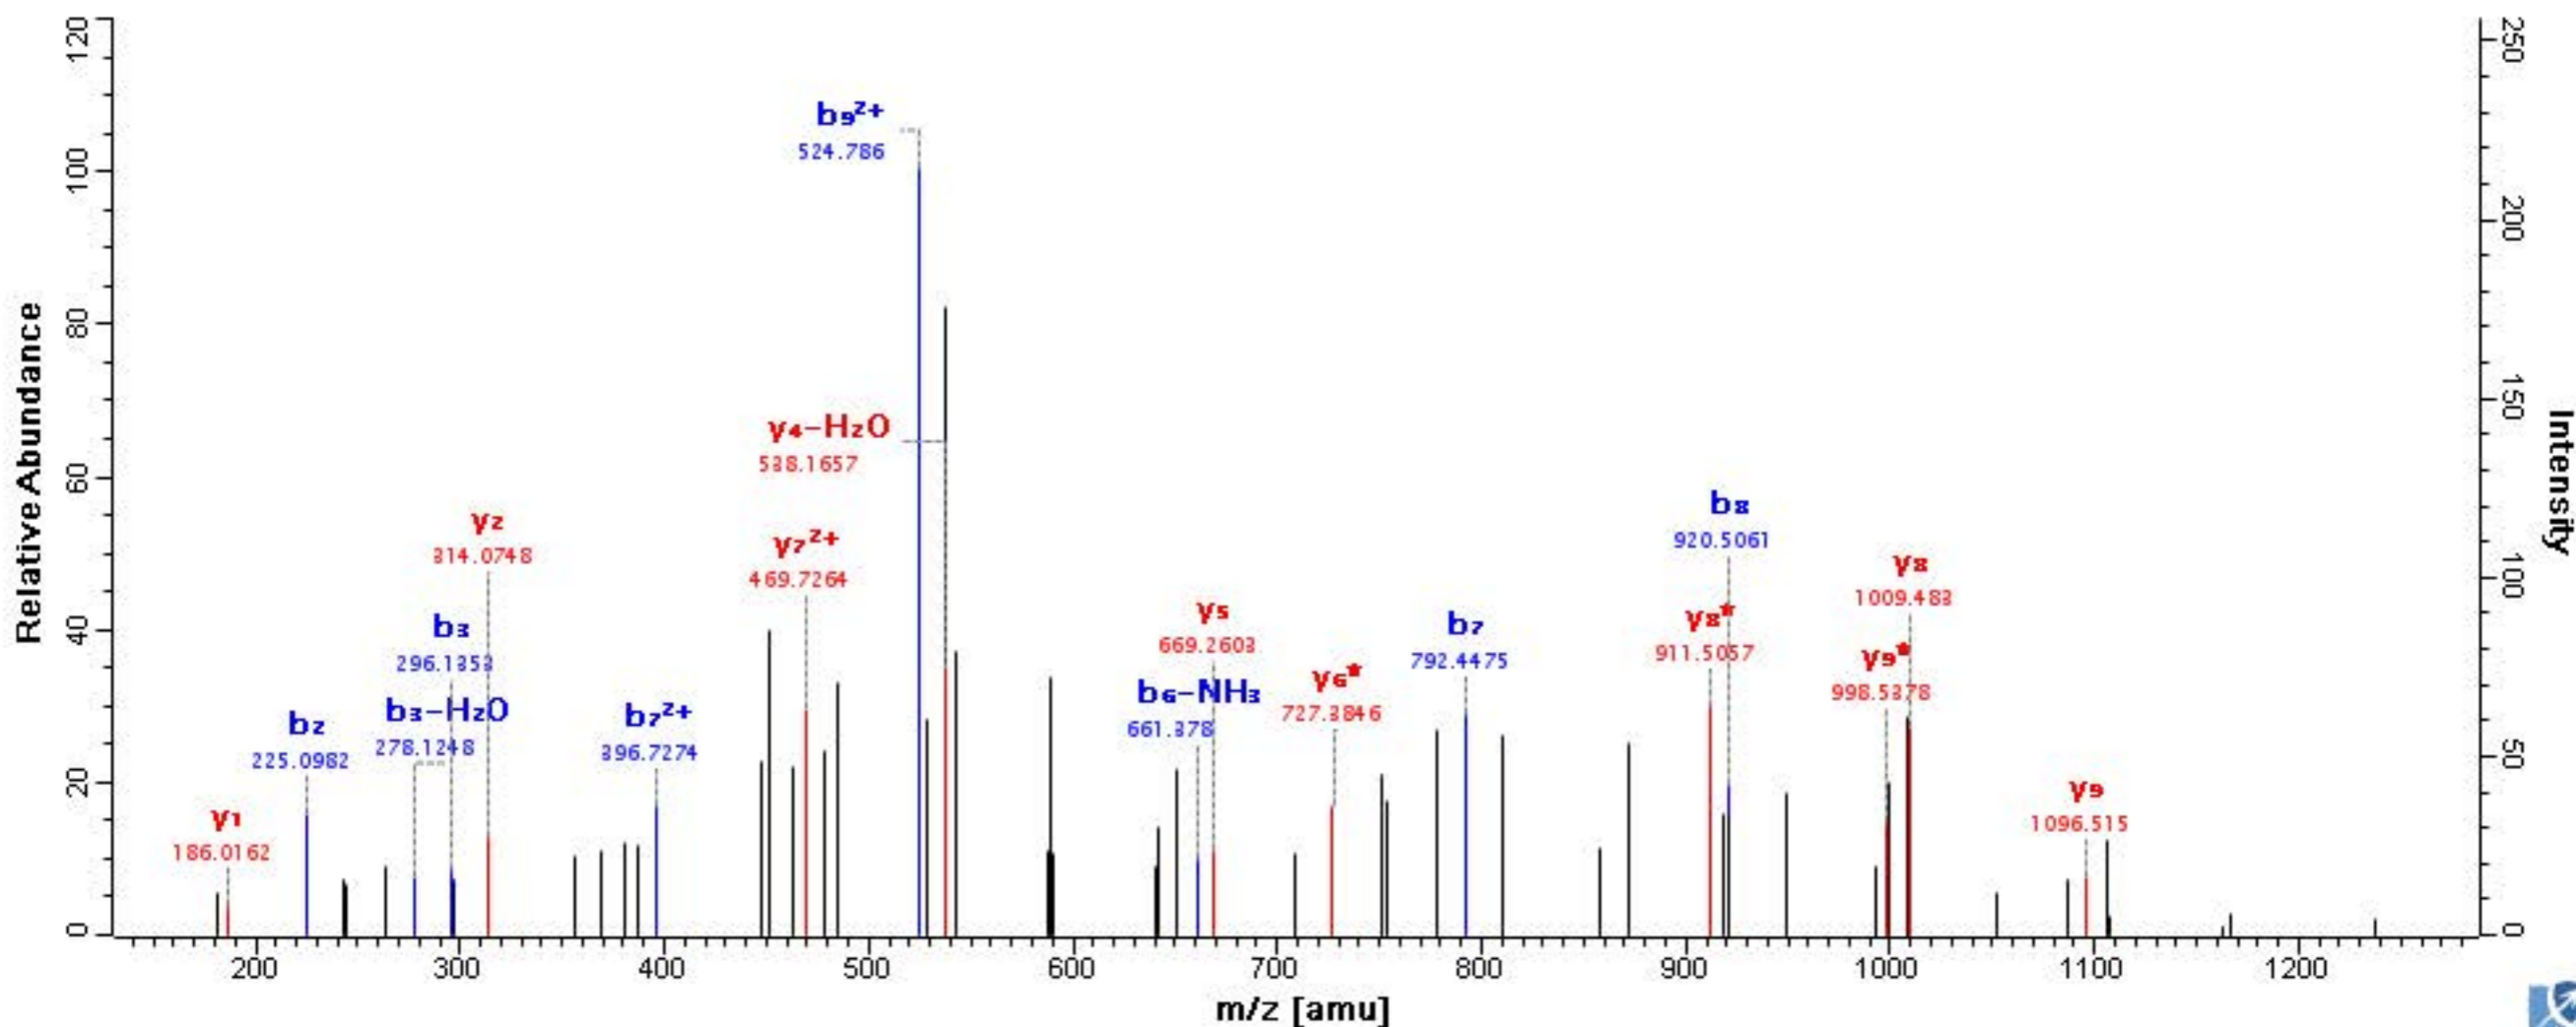

#### precursor information

|                   |                     |
|-------------------|---------------------|
| Mass:             | 1232.56647          |
| m/z:              | System.Collections. |
| Charge:           | System.Collections. |
| Retentiontime:    | System.Collections. |
| Score:            | 103.3417            |
| Mass Error [ppm]: | 0.14093             |
| PEP:              | 0.0089679           |
| Precursor Type:   | ISO                 |

#### general information

|                       |             |
|-----------------------|-------------|
| Annotation:           | 9 of 10     |
| AminoAcids Coverage:  | 90 %        |
| Intensity Coverage:   | 34 %        |
| Protein Localisation: | 262 ... 271 |

| b <sup>2+</sup> ion |          | b ion     |          |     | y ion |          | y <sup>2+</sup> ion |           |          |           |
|---------------------|----------|-----------|----------|-----|-------|----------|---------------------|-----------|----------|-----------|
| Δ dalton            | mass     | Δ dalton  | mass     | seq |       | Δ dalton | mass                | Δ dalton  | mass     |           |
|                     | 138.0662 |           | 138.0662 | 1   | H     | 9        |                     |           |          |           |
|                     | 225.0982 | -0.12585  | 225.0982 | 2   | S     | 8        | 1096.515            | -0.036392 | 1096.515 |           |
|                     | 296.1353 | +0.029831 | 296.1353 | 3   | A     | 7        | 1009.483            | -0.020172 | 1009.483 |           |
|                     | 409.2194 |           | 409.2194 | 4   | I     | 6        | 938.4455            |           | 469.7264 | -0.127888 |
|                     | 565.3205 |           | 565.3205 | 5   | R     | 5        | 825.3615            |           | 825.3615 |           |
|                     | 678.4046 |           | 678.4046 | 6   | I     | 4        | 669.2603            | -0.131013 | 669.2603 |           |
| -0.459015           | 396.7274 | -0.039843 | 792.4475 | 7   | N     | 3        | 556.1763            |           | 556.1763 |           |
|                     | 920.5061 | -0.136873 | 920.5061 | 8   | Q     | 2        | 442.1334            |           | 442.1334 |           |
| +0.125718           | 524.786  |           | 1048.565 | 9   | Q     | 1        | 314.0748            | -0.178293 | 314.0748 |           |
|                     |          |           |          | 10  | S     | 0        | 186.0162            | -0.13679  | 186.0162 |           |

Source: 20130211\_VR\_Bsu\_TripleSILAC\_pWTPKPrpCReplicate3\_F13  
 Scannumber: 8790  
 Protein: BSU13770; ykvO  
 Peptide Score: 39.65  
 Method: ITMS; CID; 3

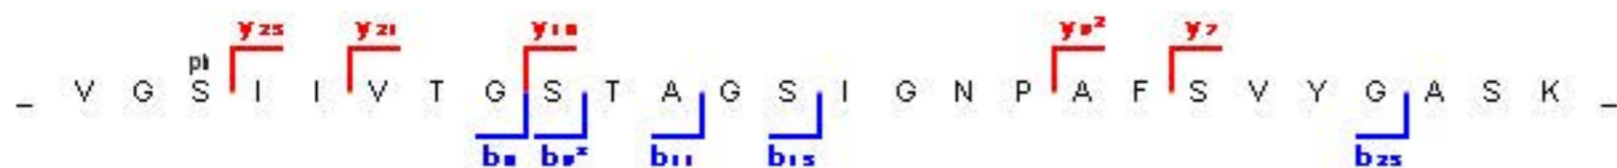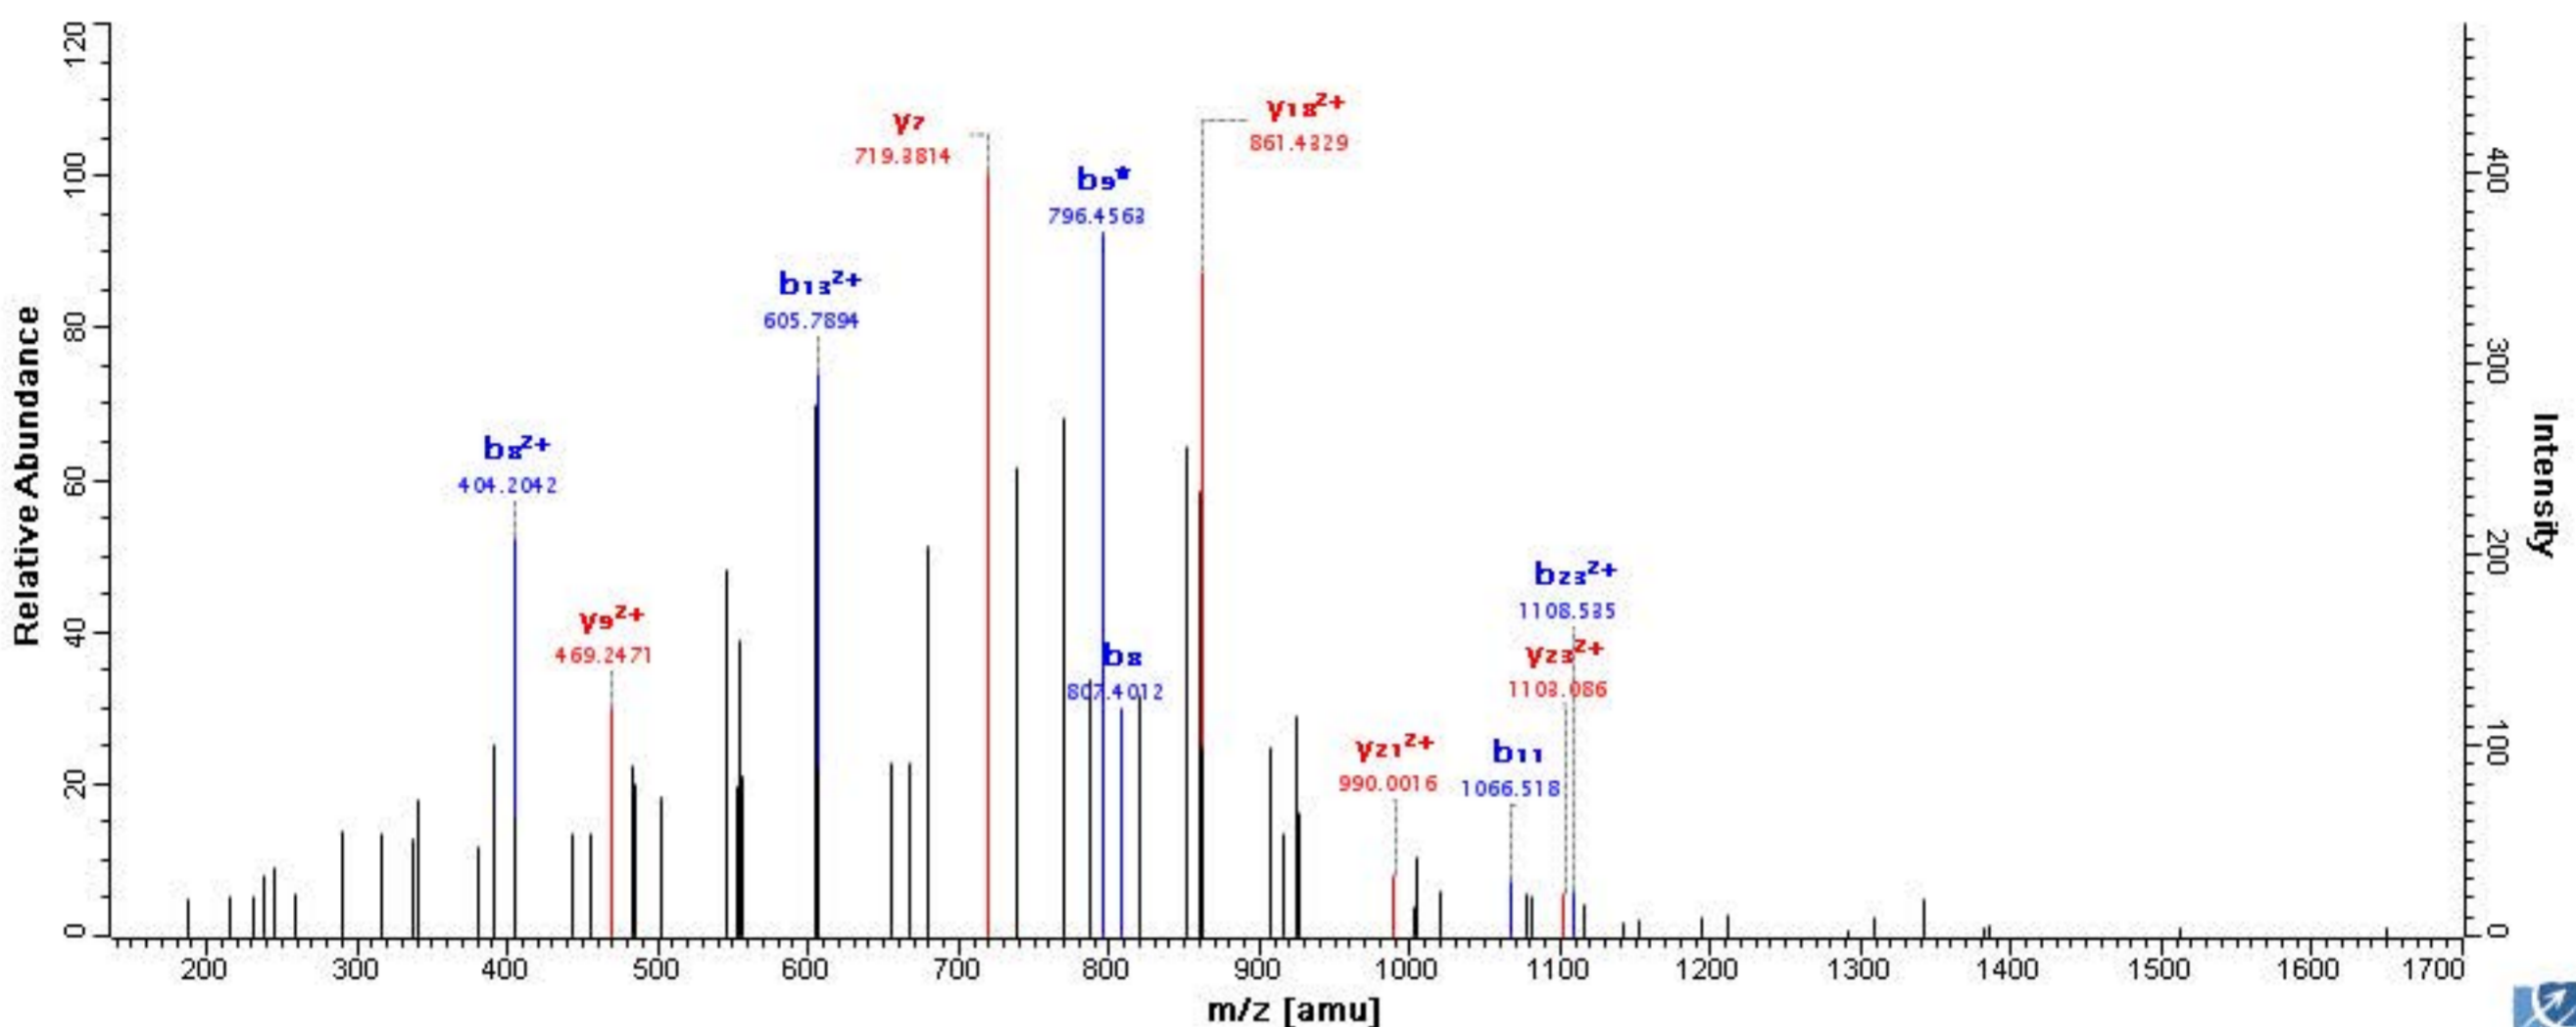

#### precursor information

|                   |                     |
|-------------------|---------------------|
| Mass:             | 2519.22886          |
| m/z:              | System.Collections. |
| Charge:           | System.Collections. |
| Retentiontime:    | System.Collections. |
| Score:            | 39.64721            |
| Mass Error [ppm]: | -0.80238            |
| PEP:              | 0.08806             |
| Precursor Type:   | MULTI               |

| b <sup>2+</sup> ion |          | b ion     |          |    |     |    | y ion    |           | y <sup>2+</sup> ion |           |
|---------------------|----------|-----------|----------|----|-----|----|----------|-----------|---------------------|-----------|
| Δ dalton            | mass     | Δ dalton  | mass     |    | seq |    | Δ dalton | mass      | Δ dalton            | mass      |
|                     | 100.0757 |           | 100.0757 | 1  | V   | 25 |          |           |                     |           |
|                     | 157.0972 |           | 157.0972 | 2  | G   | 24 | 2429.184 |           | 2429.184            |           |
|                     | 324.0955 |           | 324.0955 | 3  | S   | 23 | 2372.162 |           | 2372.162            |           |
|                     | 437.1796 |           | 437.1796 | 4  | I   | 22 | 2205.164 |           | 1103.086            | -0.489753 |
|                     | 550.2636 |           | 550.2636 | 5  | I   | 21 | 2092.08  |           | 2092.08             |           |
|                     | 649.3321 |           | 649.3321 | 6  | V   | 20 | 1978.996 |           | 990.0016            | -0.255725 |
|                     | 750.3797 |           | 750.3797 | 7  | T   | 19 | 1879.928 |           | 1879.928            |           |
| +0.13341            | 404.2042 | -0.002759 | 807.4012 | 8  | G   | 18 | 1778.88  |           | 1778.88             |           |
|                     | 894.4332 |           | 894.4332 | 9  | S   | 17 | 1721.858 |           | 861.4329            | +0.045353 |
|                     | 995.4809 |           | 995.4809 | 10 | T   | 16 | 1634.826 |           | 1634.826            |           |
|                     | 1066.518 | +0.098804 | 1066.518 | 11 | A   | 15 | 1533.779 |           | 1533.779            |           |
|                     | 1123.539 |           | 1123.539 | 12 | G   | 14 | 1462.742 |           | 1462.742            |           |
| +0.075048           | 605.7894 |           | 1210.572 | 13 | S   | 13 | 1405.72  |           | 1405.72             |           |
|                     | 1323.656 |           | 1323.656 | 14 | I   | 12 | 1318.688 |           | 1318.688            |           |
|                     | 1380.677 |           | 1380.677 | 15 | G   | 11 | 1205.604 |           | 1205.604            |           |
|                     | 1494.72  |           | 1494.72  | 16 | N   | 10 | 1148.583 |           | 1148.583            |           |
|                     | 1591.773 |           | 1591.773 | 17 | P   | 9  | 1034.54  |           | 1034.54             |           |
|                     | 1662.81  |           | 1662.81  | 18 | A   | 8  | 937.4869 |           | 469.2471            | -0.435996 |
|                     | 1809.878 |           | 1809.878 | 19 | F   | 7  | 866.4498 |           | 866.4498            |           |
|                     | 1896.91  |           | 1896.91  | 20 | S   | 6  | 719.3814 | -0.371553 | 719.3814            |           |
|                     | 1995.979 |           | 1995.979 | 21 | V   | 5  | 632.3494 |           | 632.3494            |           |
|                     | 2159.042 |           | 2159.042 | 22 | Y   | 4  | 533.2809 |           | 533.2809            |           |
| +0.305192           | 1108.535 |           | 2216.063 | 23 | G   | 3  | 370.2176 |           | 370.2176            |           |
|                     | 2287.101 |           | 2287.101 | 24 | A   | 2  | 313.1961 |           | 313.1961            |           |
|                     | 2374.133 |           | 2374.133 | 25 | S   | 1  | 242.159  |           | 242.159             |           |
|                     |          |           |          | 26 | K   | 0  | 155.127  |           | 155.127             |           |

#### general information

|                       |             |
|-----------------------|-------------|
| Annotation:           | 10 of 26    |
| AminoAcids Coverage:  | 38 %        |
| Intensity Coverage:   | 31 %        |
| Protein Localisation: | 130 ... 155 |

Source: 20130212\_VR\_Bsu\_TripleSILAC\_pWTPPrkCPrpCReplicate3\_F20  
 Scannumber: 5689  
 Protein: BSU32260; hom; tdm  
 Peptide Score: 100.69  
 Method: ITMS; CID; 3

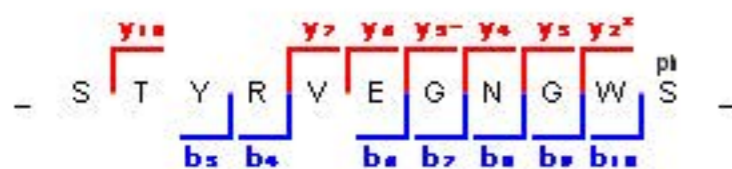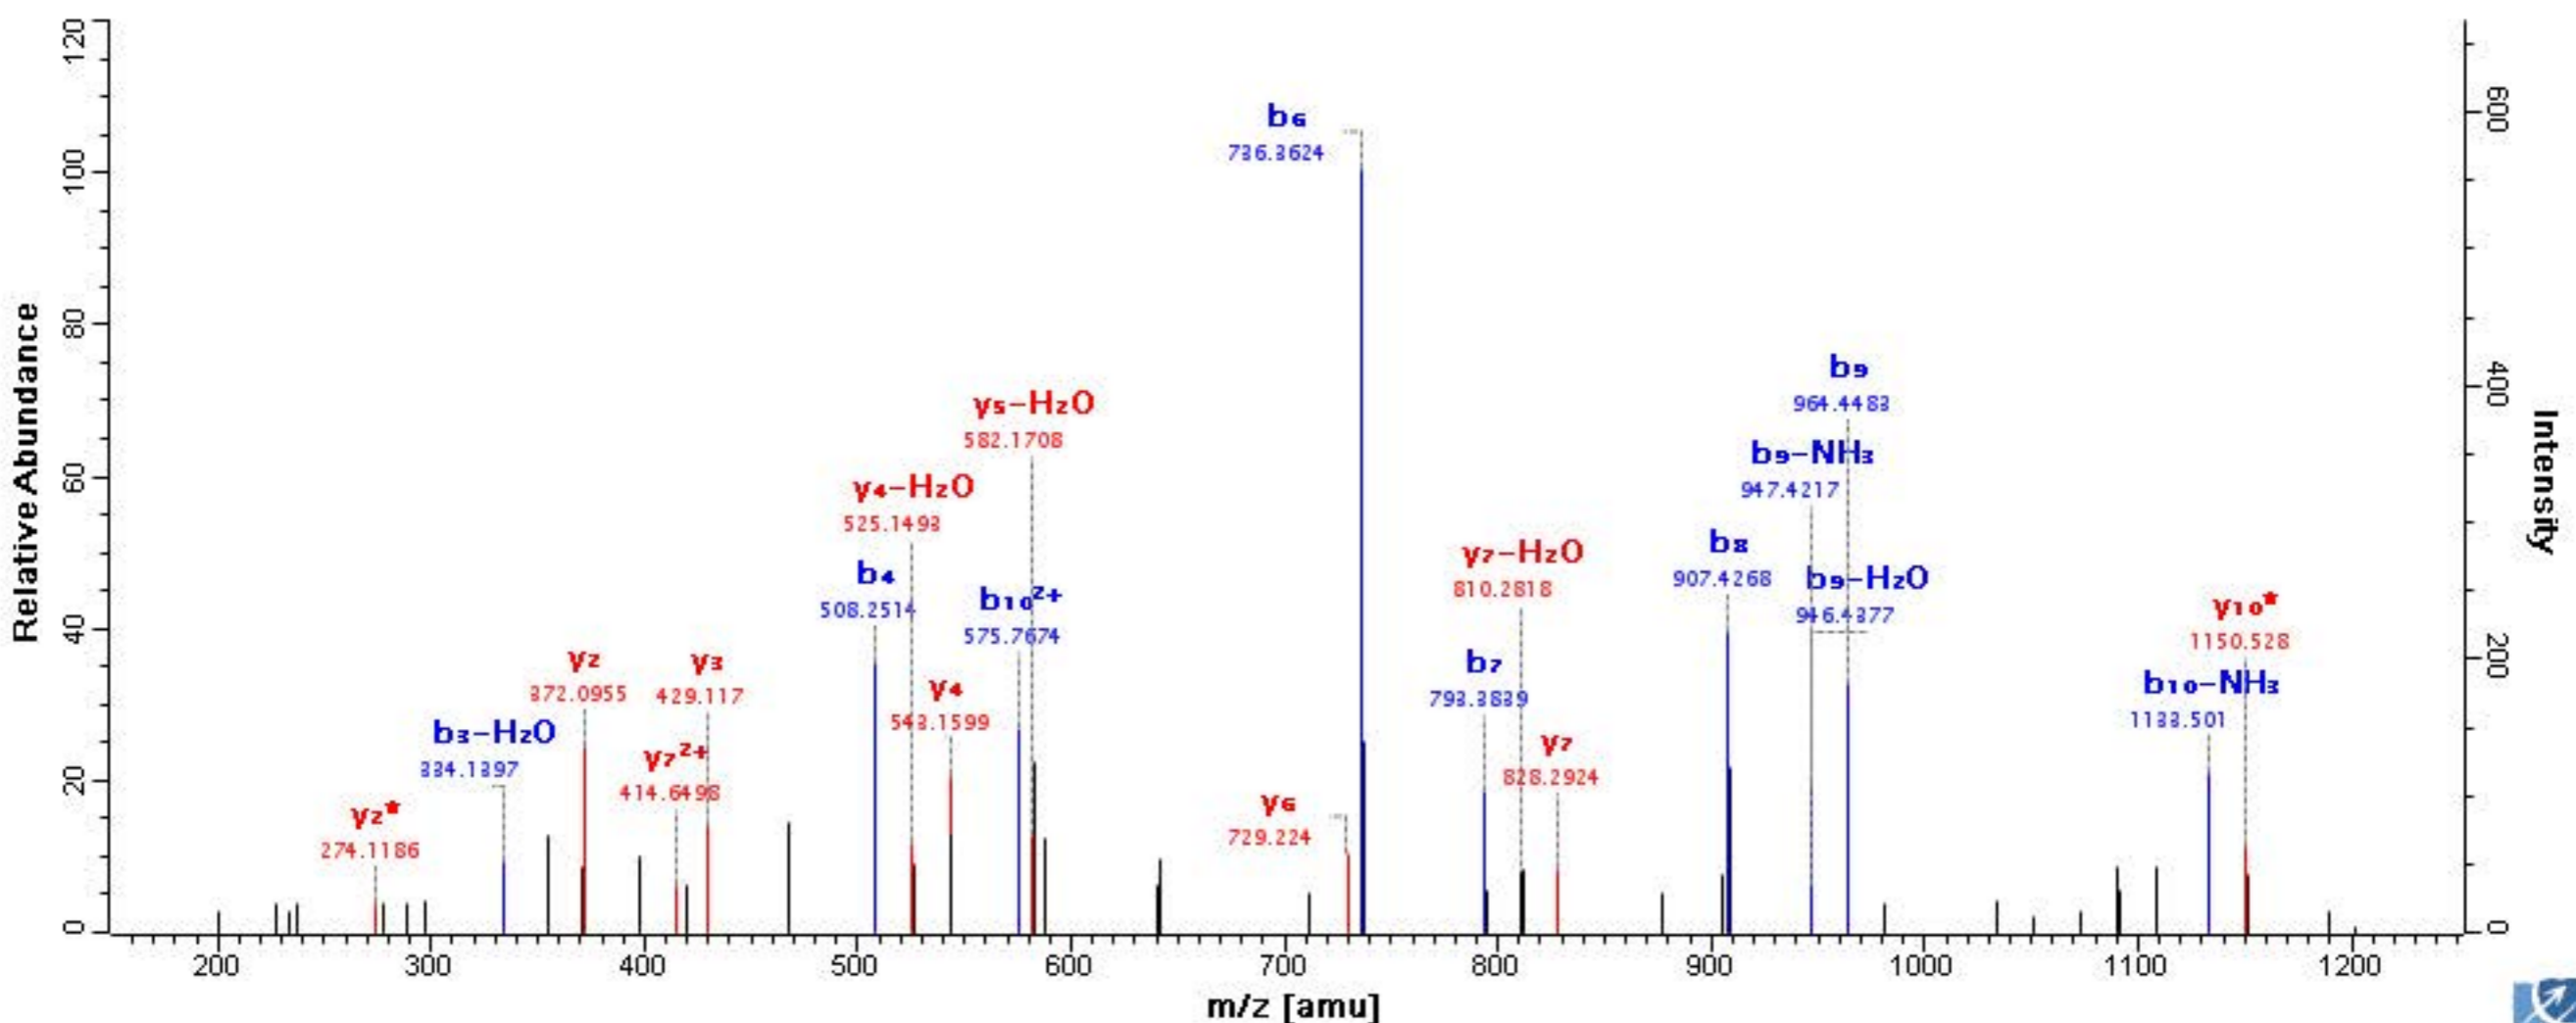

#### precursor information

|                   |                     |
|-------------------|---------------------|
| Mass:             | 1334.52923          |
| m/z:              | System.Collections. |
| Charge:           | System.Collections. |
| Retentiontime:    | System.Collections. |
| Score:            | 100.6867            |
| Mass Error [ppm]: | -0.011995           |
| PEP:              | 0.017012            |
| Precursor Type:   | ISO                 |

#### general information

|                       |             |
|-----------------------|-------------|
| Annotation:           | 9 of 11     |
| AminoAcids Coverag    | 82 %        |
| Intensity Coverage:   | 60 %        |
| Protein Localisation: | 423 ... 433 |

| b <sup>2+</sup> ion |          | b ion     |          |     | y ion |          | y <sup>2+</sup> ion |           |          |           |
|---------------------|----------|-----------|----------|-----|-------|----------|---------------------|-----------|----------|-----------|
| Δ dalton            | mass     | Δ dalton  | mass     | seq |       | Δ dalton | mass                | Δ dalton  | mass     |           |
|                     | 88.0393  |           | 88.0393  | 1   | S     | 10       |                     |           |          |           |
|                     | 189.087  |           | 189.087  | 2   | T     | 9        | 1248.504            |           | 1248.504 |           |
|                     | 352.1503 |           | 352.1503 | 3   | Y     | 8        | 1147.457            |           | 1147.457 |           |
|                     | 508.2514 | +0.01347  | 508.2514 | 4   | R     | 7        | 984.3935            |           | 984.3935 |           |
|                     | 607.3198 |           | 607.3198 | 5   | V     | 6        | 828.2924            | -0.050248 | 414.6498 | +0.210099 |
|                     | 736.3624 | +0.004941 | 736.3624 | 6   | E     | 5        | 729.224             | +0.10685  | 729.224  |           |
|                     | 793.3839 | +0.008501 | 793.3839 | 7   | G     | 4        | 600.1814            |           | 600.1814 |           |
|                     | 907.4268 | -0.185122 | 907.4268 | 8   | N     | 3        | 543.1599            | -0.135917 | 543.1599 |           |
|                     | 964.4483 | -0.037152 | 964.4483 | 9   | G     | 2        | 429.117             | -0.024753 | 429.117  |           |
| +0.068806           | 575.7674 |           | 1150.528 | 10  | W     | 1        | 372.0955            | -0.205437 | 372.0955 |           |
|                     |          |           |          | 11  | S     | 0        | 186.0162            |           | 186.0162 |           |

Source: 20130212\_VR\_Bsu\_TripleSILAC\_pWTPPrkCPrpCReplicate3\_F20  
 Scannumber: 6269  
 Protein: BSU29540; ppnK2; ytdI  
 Peptide Score: 133.55  
 Method: ITMS; CID; 3

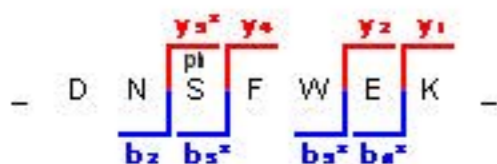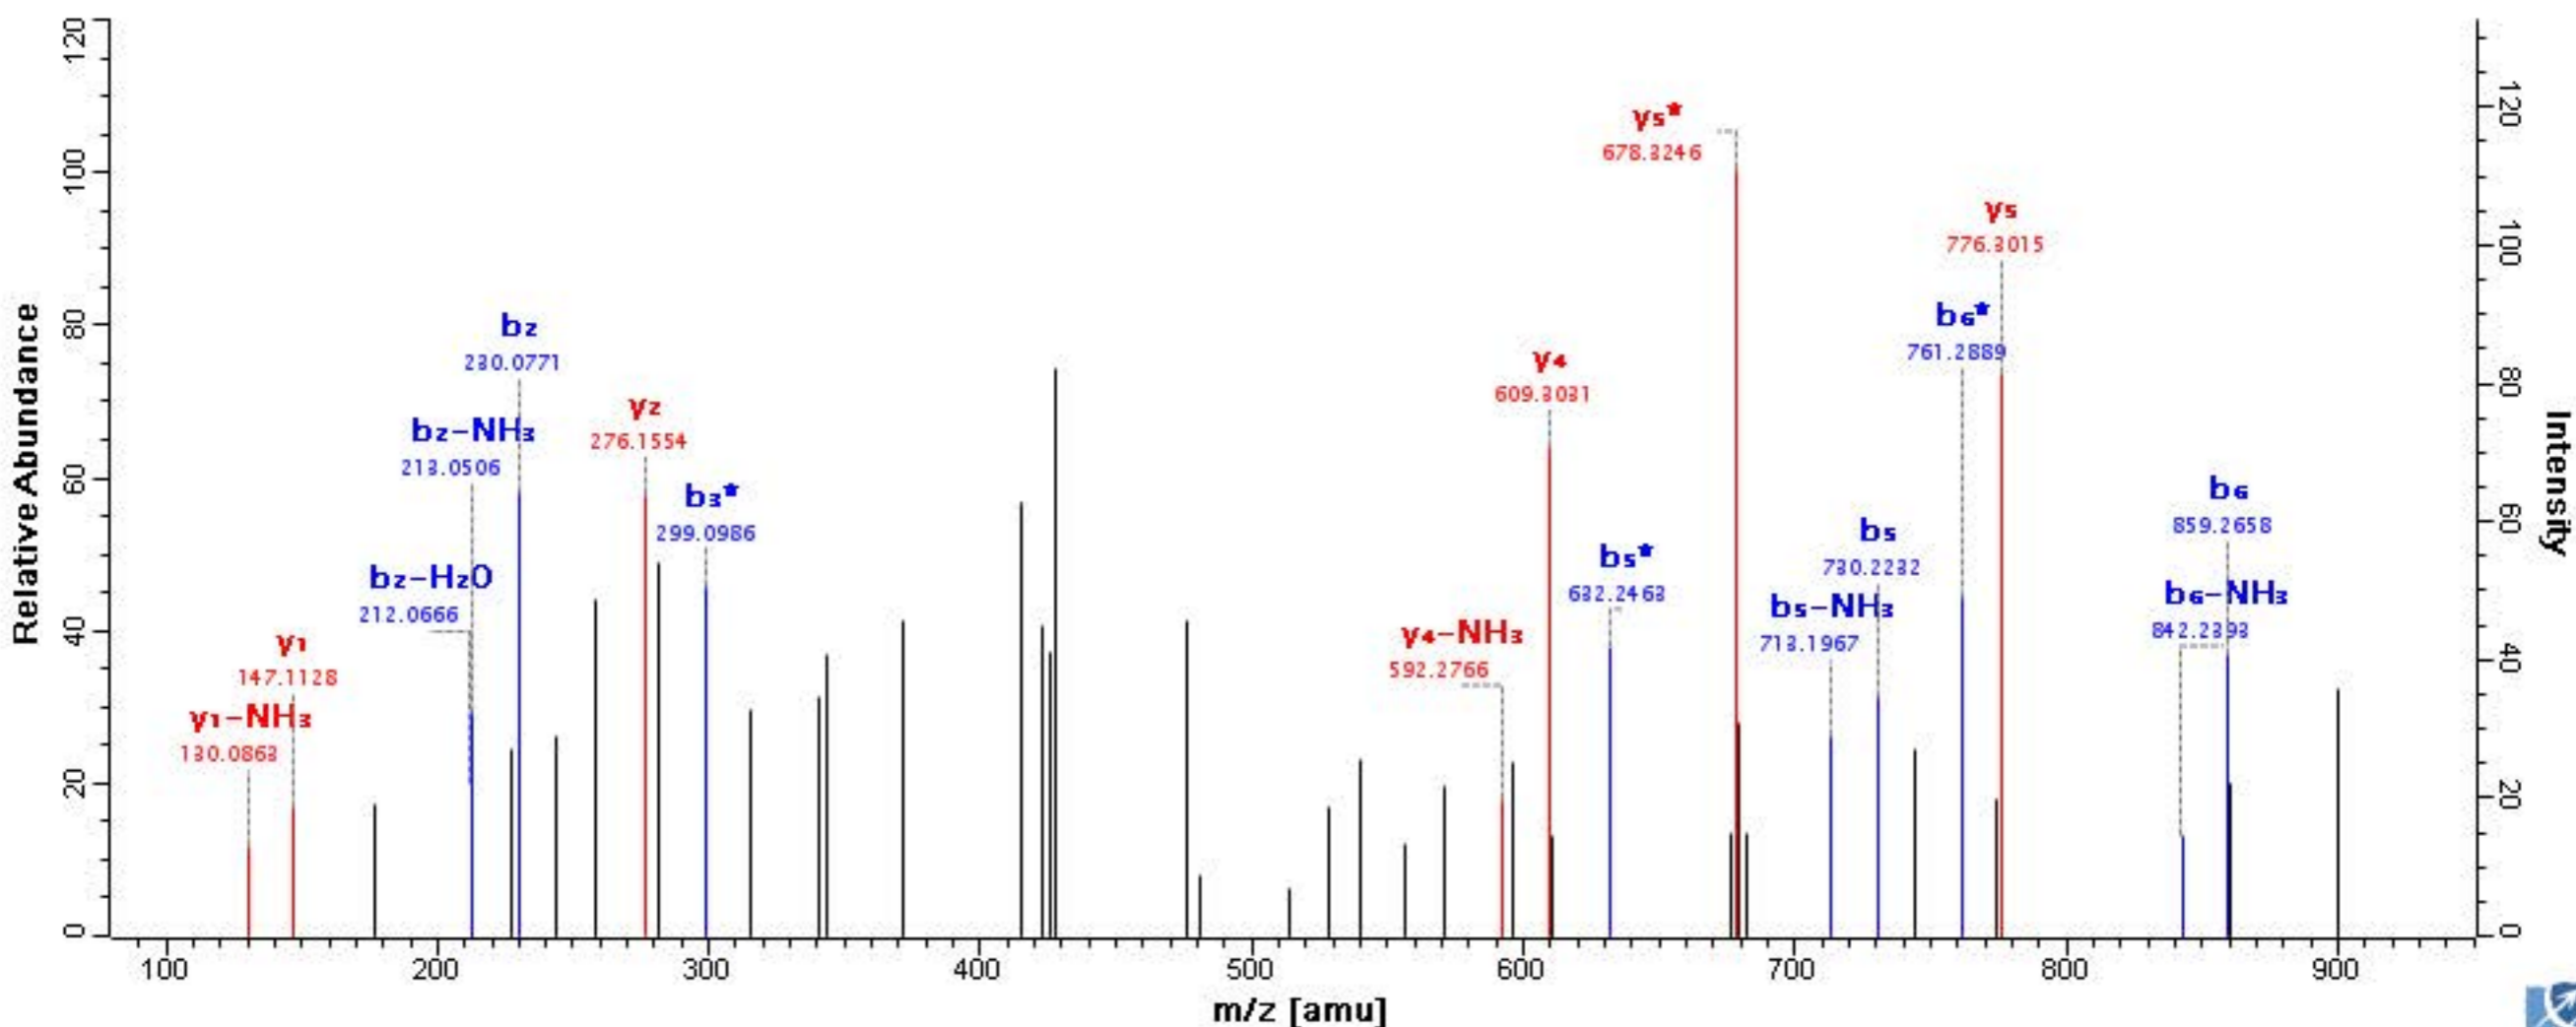

#### precursor information

|                       |                     |
|-----------------------|---------------------|
| Mass:                 | 1004.36411          |
| m/z:                  | System.Collections. |
| Charge:               | System.Collections. |
| Retentiontime:        | System.Collections. |
| Score:                | 133.5481            |
| Mass Error [ppm]:     | 0.029983            |
| g PFP:                | 1.8118E-07          |
| Annotation:           | 6 of 7              |
| AminoAcids Coverage:  | 86 %                |
| Intensity Coverage:   | 45 %                |
| Protein Localisation: | 255 ... 261         |

| b ion      |               |   |     | y ion    |               |            |
|------------|---------------|---|-----|----------|---------------|------------|
| Δ dalton   | mass          |   | seq | Δ dalton | mass          |            |
|            | 116.034219499 | 1 | D   | 6        |               |            |
| +0.0337845 | 230.077146946 | 2 | N   | 5        | 890.344410402 |            |
|            | 397.075505764 | 3 | S   | 4        | 776.301482955 | +0.0131533 |
|            | 544.14391968  | 4 | F   | 3        | 609.303124136 | -0.1260611 |
| -0.1209987 | 730.223232634 | 5 | W   | 2        | 462.23471022  |            |
| -0.1613946 | 859.26582573  | 6 | E   | 1        | 276.155397267 | +0.1271345 |
|            |               | 7 | K   | 0        | 147.112804171 | +0.0224192 |

Source: 20130212\_VR\_Bsu\_TripleSILAC\_pWTPPrkCPrpCReplicate3\_F20  
 Scannumber: 6440  
 Protein: BSU14670; suhB; yktC  
 Peptide Score: 140.82  
 Method: ITMS; CID; 3

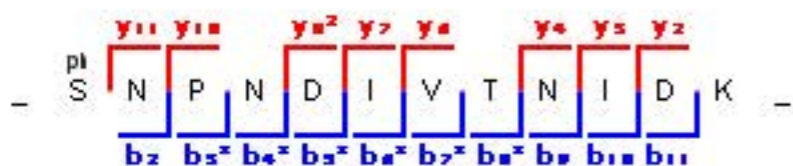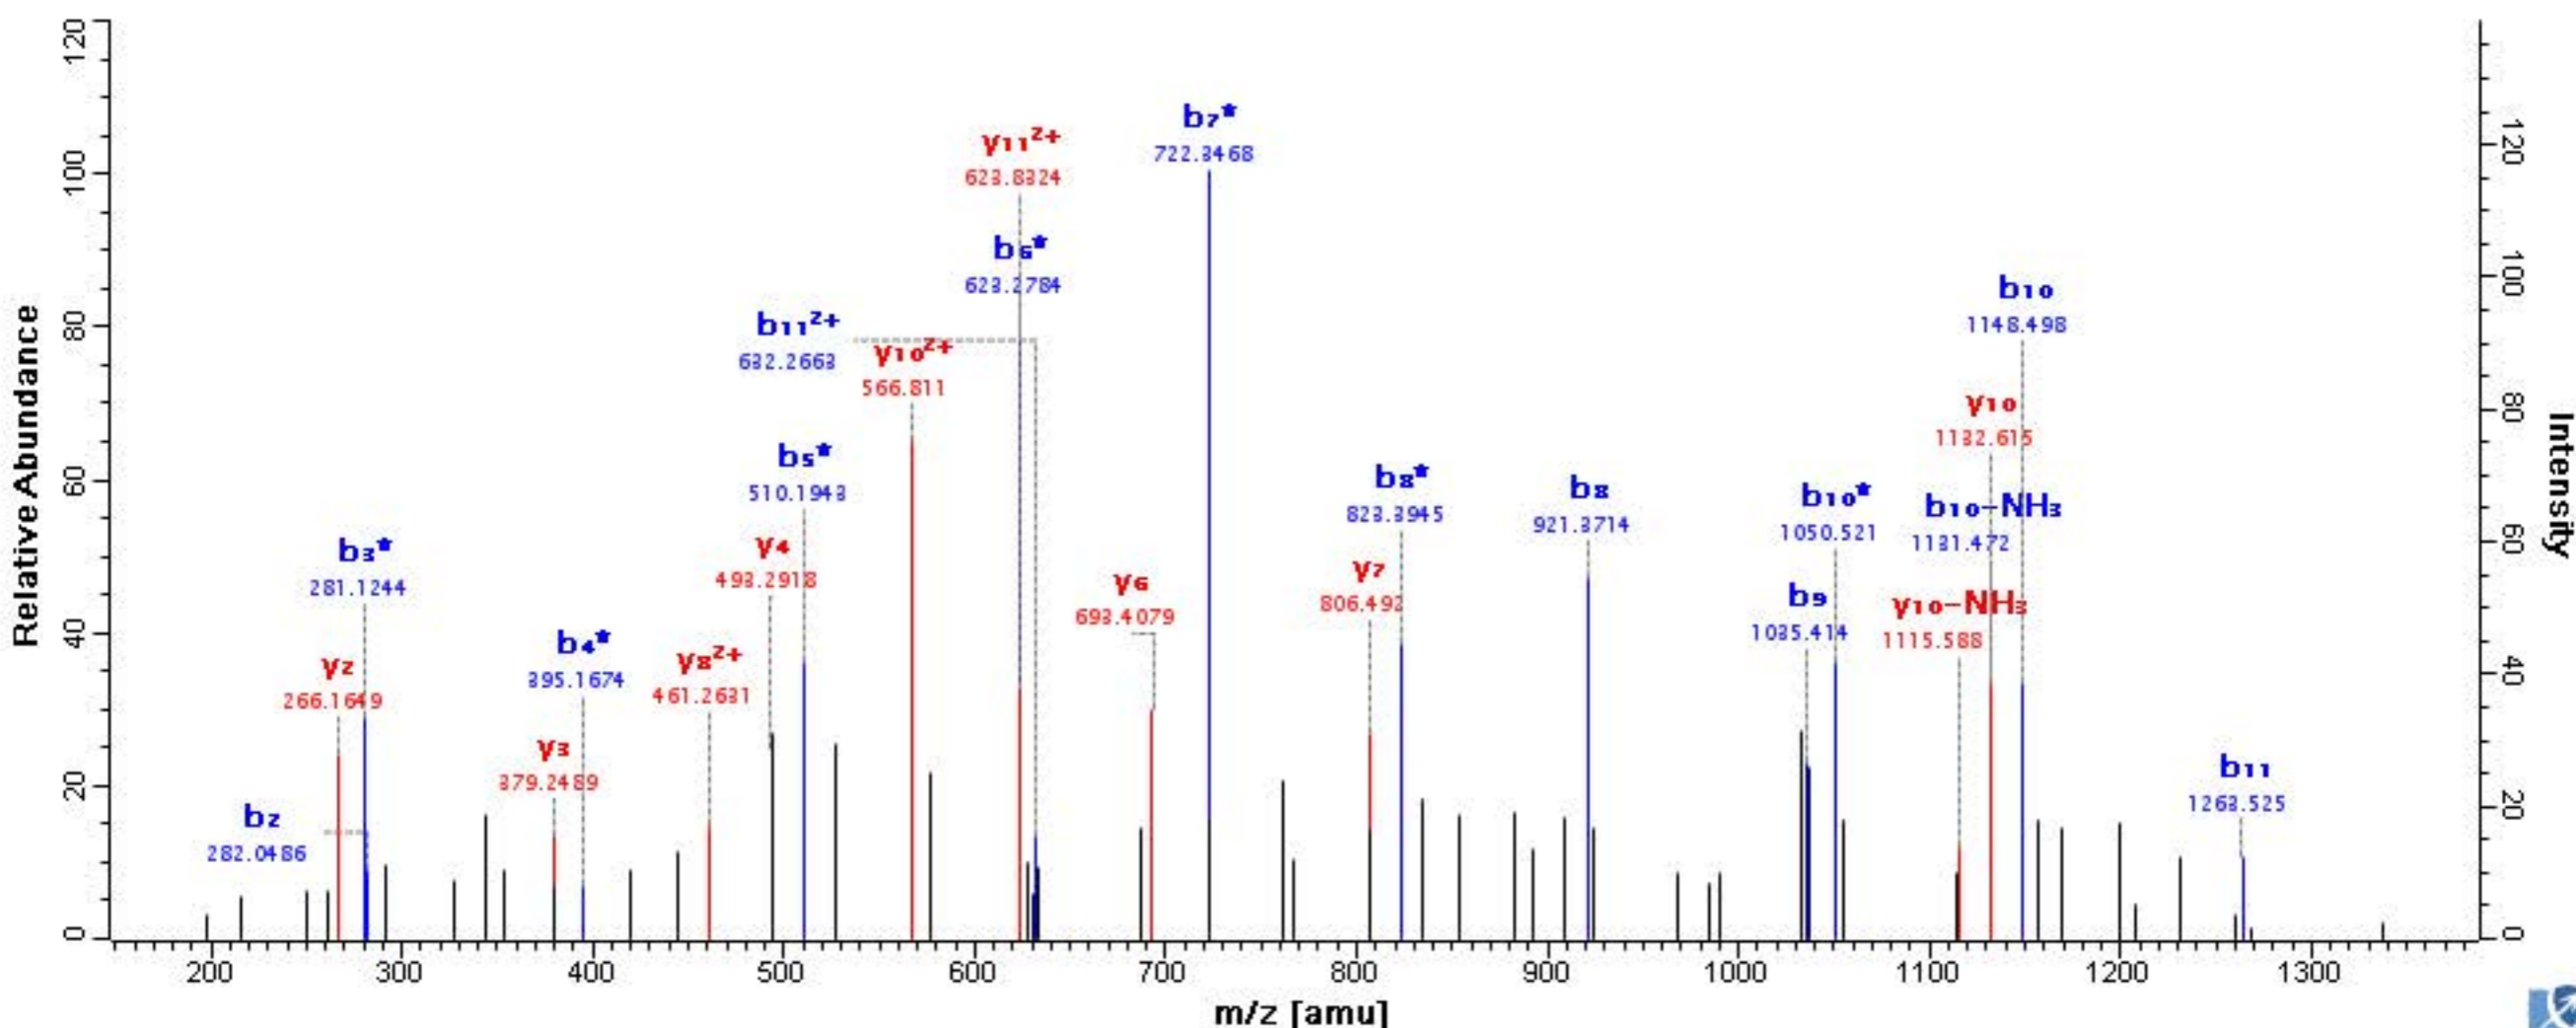

#### precursor information

|                   |                     |
|-------------------|---------------------|
| Mass:             | 1408.62374          |
| m/z:              | System.Collections. |
| Charge:           | System.Collections. |
| Retentiontime:    | System.Collections. |
| Score:            | 140.8238            |
| Mass Error [ppm]: | 0.14278             |
| PEP:              | 1.7693E-12          |
| Precursor Type:   | MULTI               |

#### general information

|                       |           |
|-----------------------|-----------|
| Annotation:           | 10 of 12  |
| AminoAcids Coverag    | 83 %      |
| Intensity Coverage:   | 57 %      |
| Protein Localisation: | 36 ... 47 |

| b <sup>2+</sup> ion |          | b ion     |          |     | γ ion |          | γ <sup>2+</sup> ion |           |          |           |
|---------------------|----------|-----------|----------|-----|-------|----------|---------------------|-----------|----------|-----------|
| Δ dalton            | mass     | Δ dalton  | mass     | seq |       | Δ dalton | mass                | Δ dalton  | mass     |           |
|                     | 168.0056 |           | 168.0056 | 1   | S     | 11       |                     |           |          |           |
|                     | 282.0486 | +0.031576 | 282.0486 | 2   | N     | 10       | 1246.658            |           | 623.8324 | +0.444985 |
|                     | 379.1013 |           | 379.1013 | 3   | P     | 9        | 1132.615            | -0.090833 | 566.811  | -0.151166 |
|                     | 493.1443 |           | 493.1443 | 4   | N     | 8        | 1035.562            |           | 1035.562 |           |
|                     | 608.1712 |           | 608.1712 | 5   | D     | 7        | 921.5189            |           | 461.2631 | +0.100781 |
|                     | 721.2553 |           | 721.2553 | 6   | I     | 6        | 806.492             | -0.162351 | 806.492  |           |
|                     | 820.3237 |           | 820.3237 | 7   | V     | 5        | 693.4079            | -0.261209 | 693.4079 |           |
|                     | 921.3714 | -0.245377 | 921.3714 | 8   | T     | 4        | 594.3395            |           | 594.3395 |           |
|                     | 1035.414 | +0.009059 | 1035.414 | 9   | N     | 3        | 493.2918            | +0.170801 | 493.2918 |           |
|                     | 1148.498 | +0.013618 | 1148.498 | 10  | I     | 2        | 379.2489            | -0.029131 | 379.2489 |           |
| -0.112657           | 632.2663 | +0.156719 | 1263.525 | 11  | D     | 1        | 266.1649            | +0.017397 | 266.1649 |           |
|                     |          |           |          | 12  | K     | 0        | 151.1379            |           | 151.1379 |           |



Source: 20130212\_VR\_Bsu\_TripleSILAC\_pWTPPrkCPrpCReplicate3\_F20  
 Scannumber: 7953  
 Protein: BSU40420; purA  
 Peptide Score: 166.3  
 Method: ITMS; CID; 3

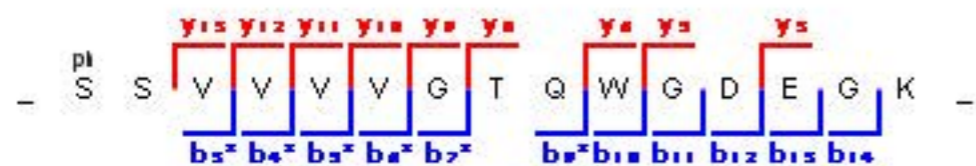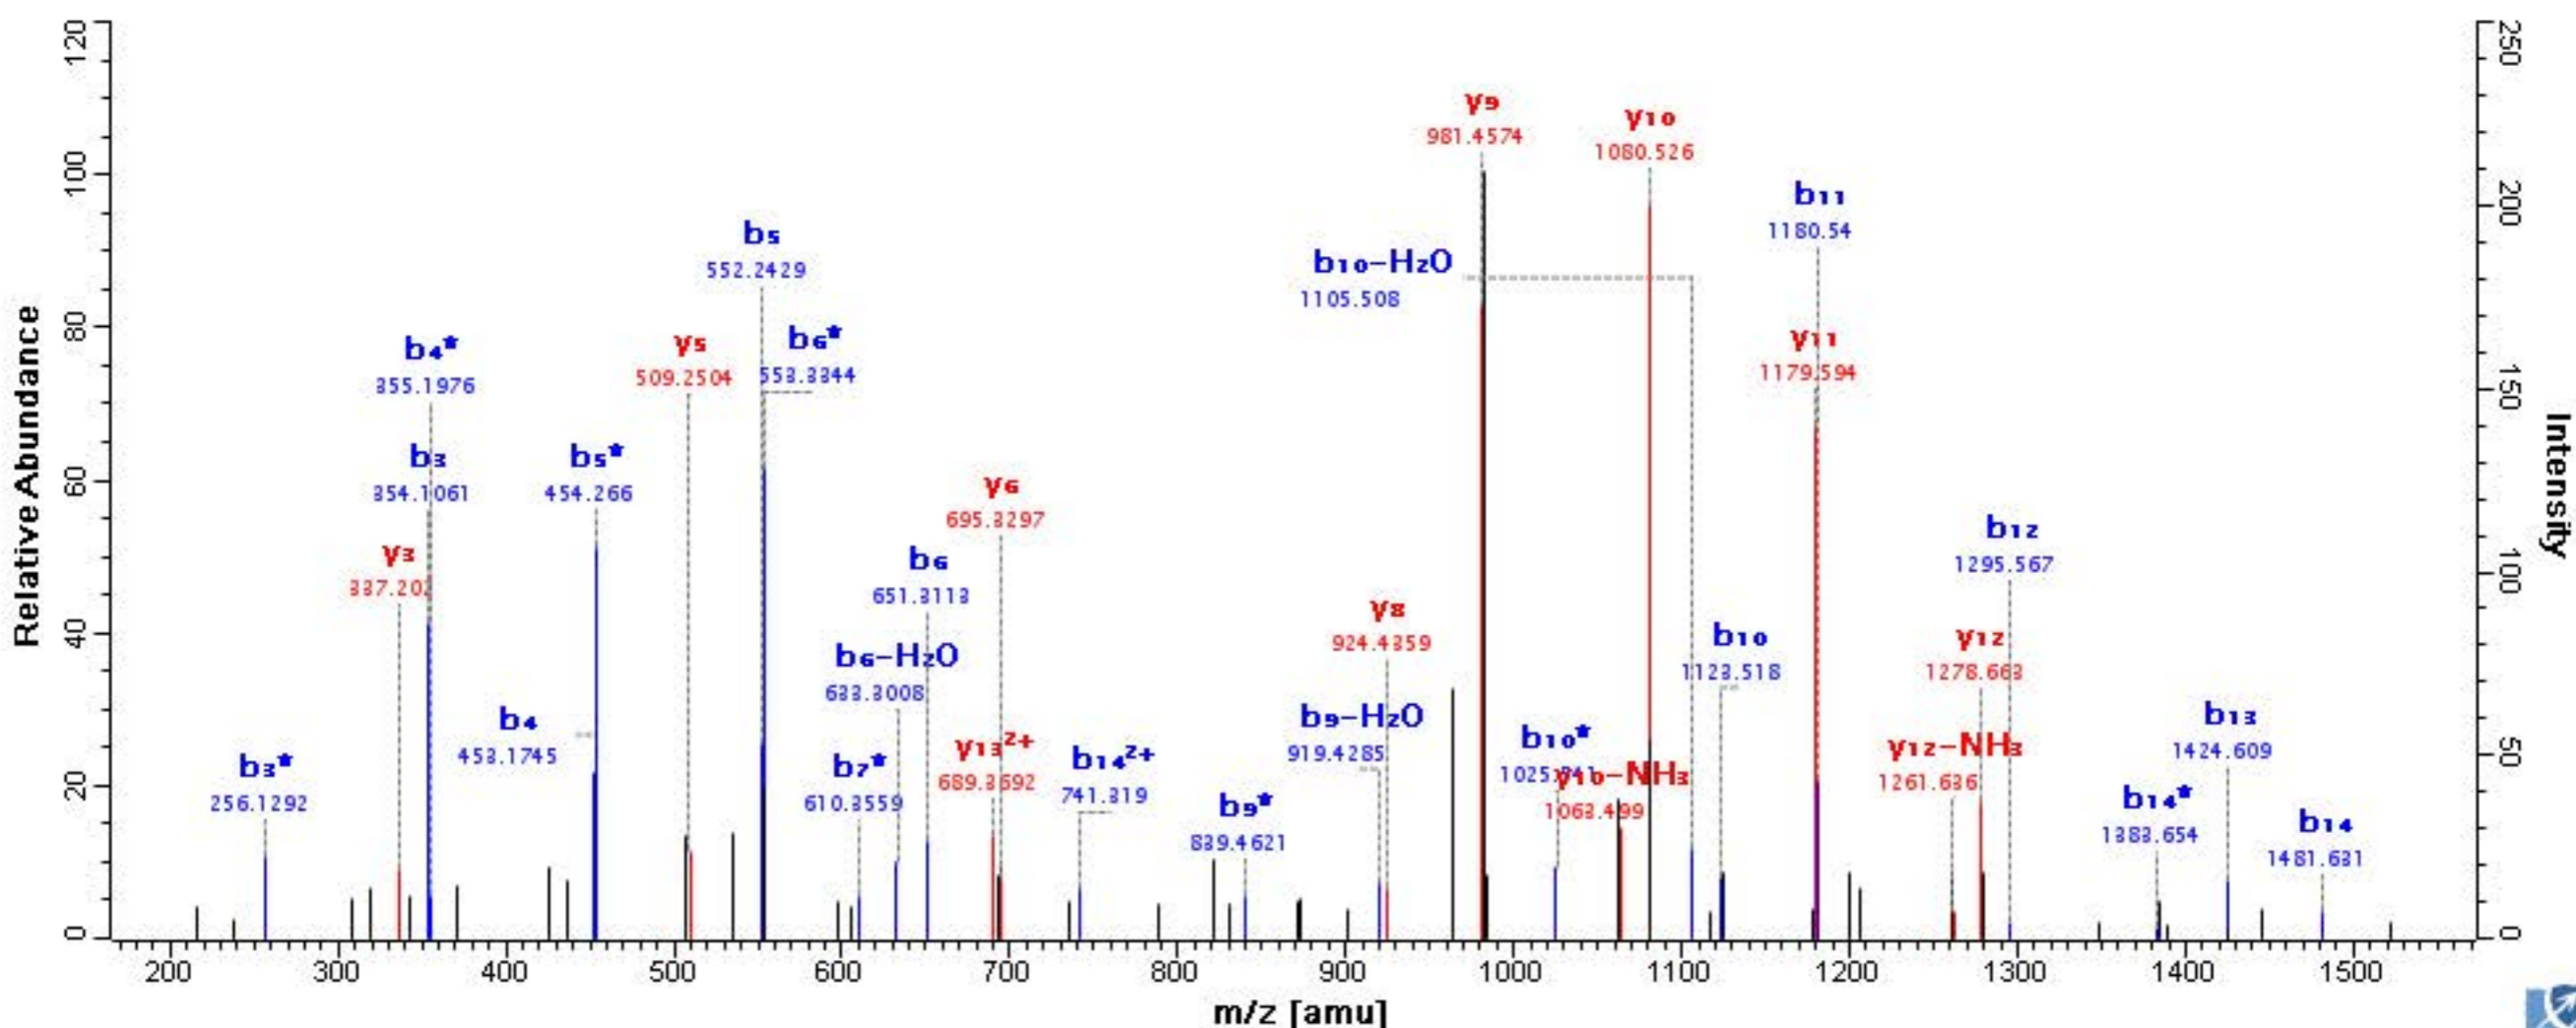

#### precursor information

|                   |                     |
|-------------------|---------------------|
| Mass:             | 1626.72904          |
| m/z:              | System.Collections. |
| Charge:           | System.Collections. |
| Retentiontime:    | System.Collections. |
| Score:            | 166.3011            |
| Mass Error [ppm]: | -0.018796           |
| PEP:              | 5.3803E-33          |
| Precursor Type:   | MULTI               |

#### general information

|                       |          |
|-----------------------|----------|
| Annotation:           | 12 of 15 |
| AminoAcids Coverag    | 80 %     |
| Intensity Coverage:   | 60 %     |
| Protein Localisation: | 2 ... 16 |

| b <sup>2+</sup> ion |          | b ion     |          |     | y ion |          | y <sup>2+</sup> ion |           |                    |
|---------------------|----------|-----------|----------|-----|-------|----------|---------------------|-----------|--------------------|
| Δ dalton            | mass     | Δ dalton  | mass     | seq |       | Δ dalton | mass                | Δ dalton  | mass               |
|                     | 168.0056 |           | 168.0056 | 1   | S     | 14       |                     |           |                    |
|                     | 255.0377 |           | 255.0377 | 2   | S     | 13       | 1464.763            |           | 1464.763           |
|                     | 354.1061 | -0.004088 | 354.1061 | 3   | V     | 12       | 1377.731            |           | 689.3692 +0.048372 |
|                     | 453.1745 | -0.387443 | 453.1745 | 4   | V     | 11       | 1278.663            | +0.034983 | 1278.663           |
|                     | 552.2429 | -0.094163 | 552.2429 | 5   | V     | 10       | 1179.594            | -0.219113 | 1179.594           |
|                     | 651.3113 | -0.029093 | 651.3113 | 6   | V     | 9        | 1080.526            | -0.042179 | 1080.526           |
|                     | 708.3328 |           | 708.3328 | 7   | G     | 8        | 981.4574            | -0.094431 | 981.4574           |
|                     | 809.3805 |           | 809.3805 | 8   | T     | 7        | 924.4359            | -0.130035 | 924.4359           |
|                     | 937.439  |           | 937.439  | 9   | Q     | 6        | 823.3883            |           | 823.3883           |
|                     | 1123.518 | -0.141277 | 1123.518 | 10  | W     | 5        | 695.3297            | -0.020667 | 695.3297           |
|                     | 1180.54  | +0.120585 | 1180.54  | 11  | G     | 4        | 509.2504            | +0.073112 | 509.2504           |
|                     | 1295.567 | -0.017931 | 1295.567 | 12  | D     | 3        | 452.2289            |           | 452.2289           |
|                     | 1424.609 | +0.334496 | 1424.609 | 13  | E     | 2        | 337.202             | -0.159579 | 337.202            |
| +0.160446           | 741.319  | +0.453169 | 1481.631 | 14  | G     | 1        | 208.1594            |           | 208.1594           |
|                     |          |           |          | 15  | K     | 0        | 151.1379            |           | 151.1379           |

Source: 20130212\_VR\_Bsu\_TripleSILAC\_pWTPPrkCPrpCReplicate3\_F20  
 Scannumber: 9378  
 Protein: BSU00650; yab5  
 Peptide Score: 229.02  
 Method: ITMS; CID; 3

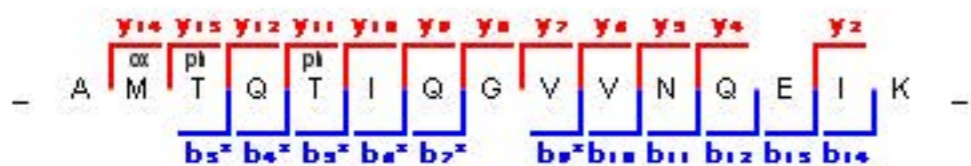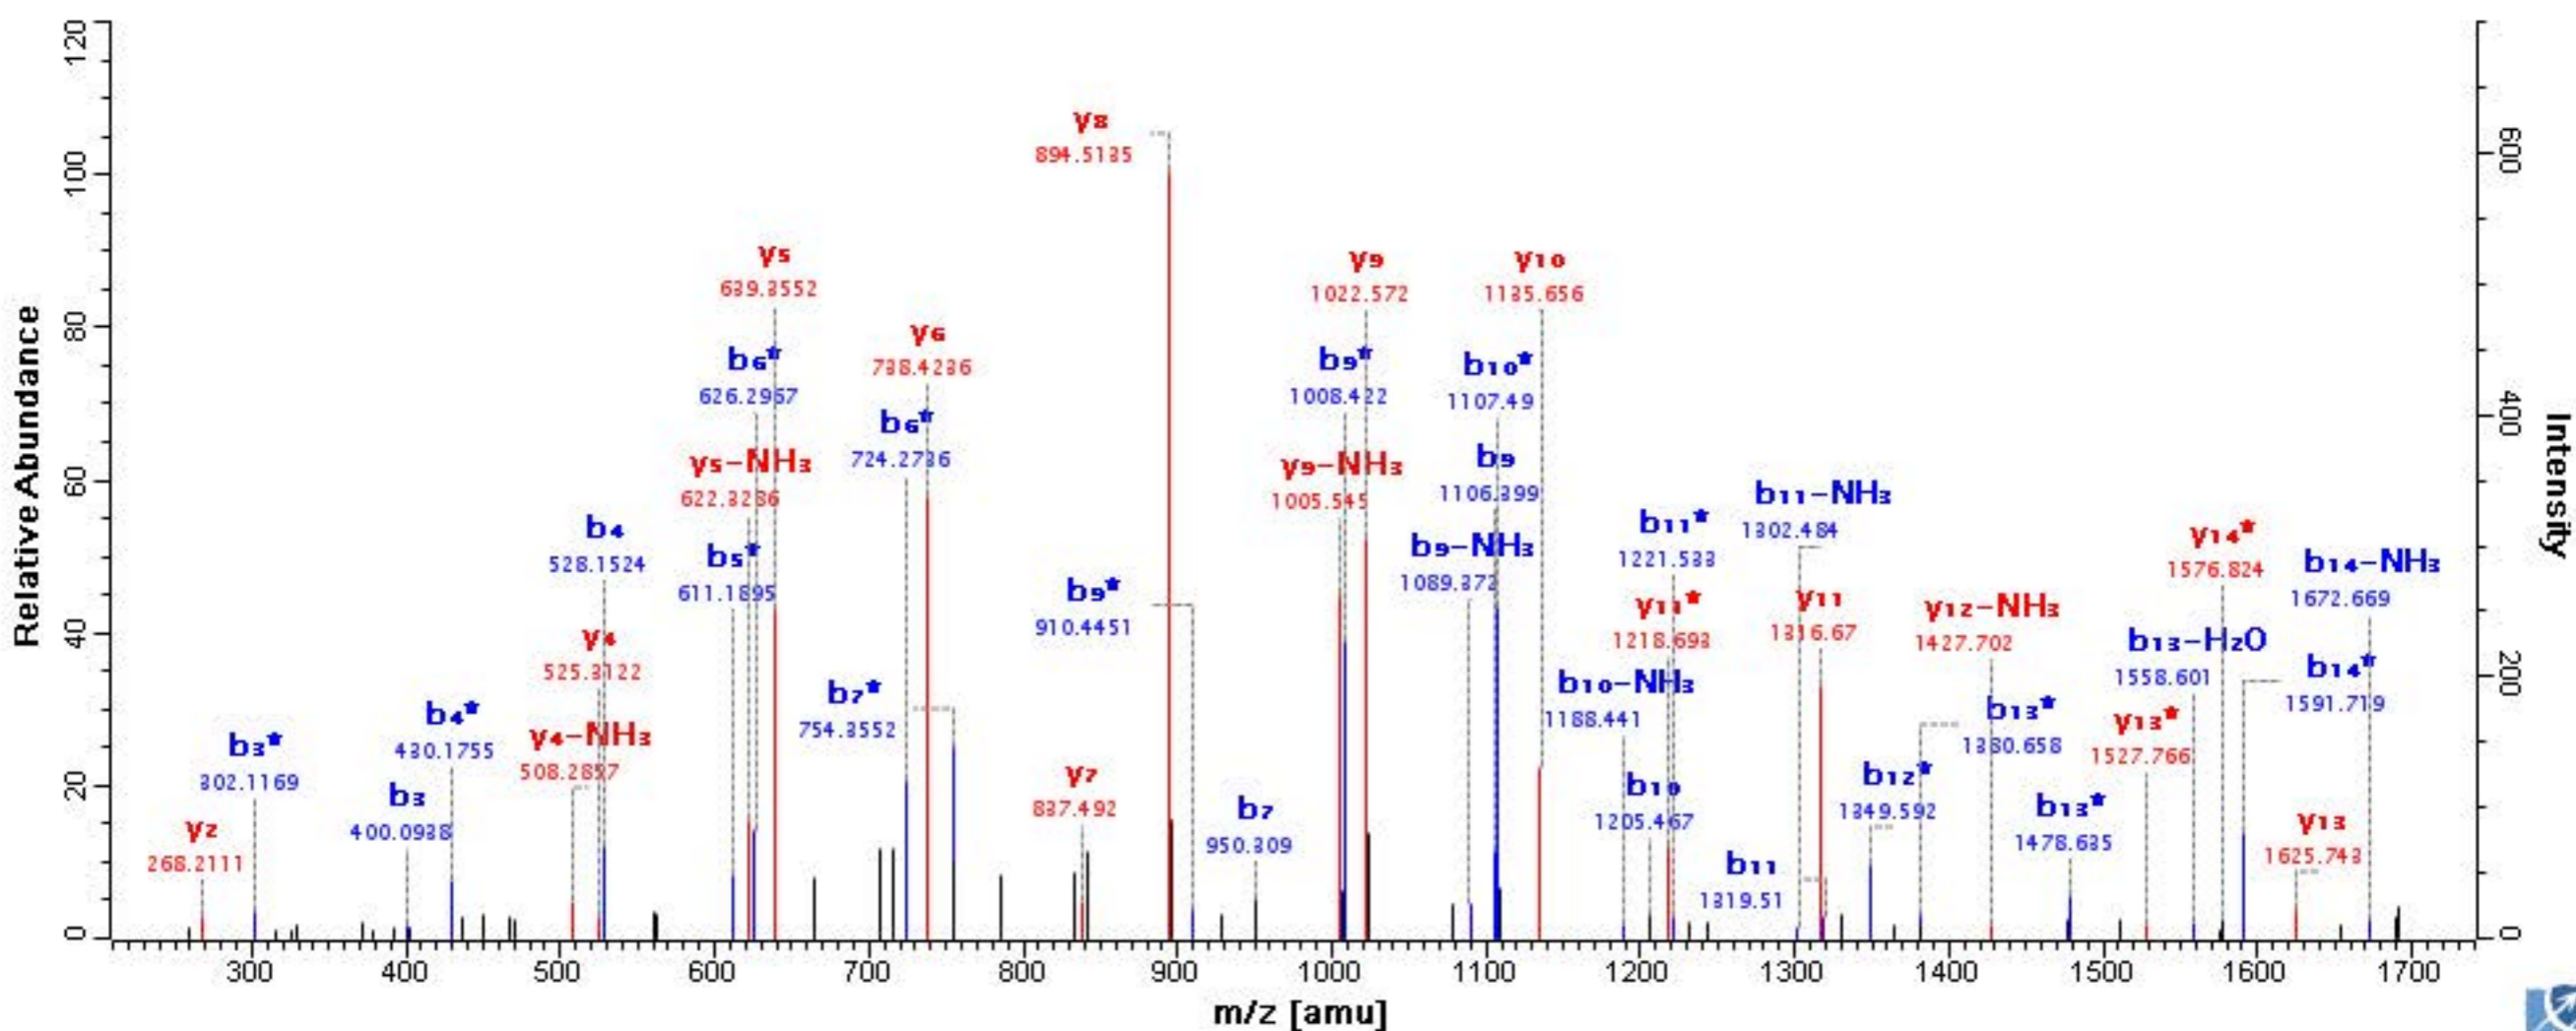

#### precursor information

|                   |                     |
|-------------------|---------------------|
| Mass:             | 1842.80746          |
| m/z:              | System.Collections. |
| Charge:           | System.Collections. |
| Retentiontime:    | System.Collections. |
| Score:            | 229.0172            |
| Mass Error [ppm]: | -0.25328            |
| PEP:              | 8.3537E-192         |
| Precursor Type:   | ISO                 |

#### general information

|                       |            |
|-----------------------|------------|
| Annotation:           | 13 of 15   |
| AminoAcids Coverage:  | 87 %       |
| Intensity Coverage:   | 77 %       |
| Protein Localisation: | 86 ... 100 |

| b ion      |                |    |     |    |                | gamma ion  |  |
|------------|----------------|----|-----|----|----------------|------------|--|
| Δ dalton   | mass           |    | seq |    | Δ dalton       | mass       |  |
|            | 72.044390254   | 1  | A   | 14 |                |            |  |
|            | 219.079789483  | 2  | M   | 13 | 1772.778092572 |            |  |
| -0.1450679 | 400.093798365  | 3  | T   | 12 | 1625.742693343 | -0.1371025 |  |
| +0.0162032 | 528.152375877  | 4  | Q   | 11 | 1444.728684461 |            |  |
|            | 709.166384759  | 5  | T   | 10 | 1316.670106949 | -0.149355  |  |
|            | 822.25044874   | 6  | I   | 9  | 1135.656098067 | -0.2890326 |  |
| -0.1734672 | 950.309026251  | 7  | Q   | 8  | 1022.572034086 | +0.1238277 |  |
|            | 1007.330489975 | 8  | G   | 7  | 894.513456575  | -0.233     |  |
| -0.1132594 | 1106.398903891 | 9  | V   | 6  | 837.491992851  | +0.0894891 |  |
| -0.1286948 | 1205.467317807 | 10 | V   | 5  | 738.423578935  | +0.006841  |  |
| -0.2281408 | 1319.510245254 | 11 | N   | 4  | 639.355165019  | -0.0710464 |  |
|            | 1447.568822766 | 12 | Q   | 3  | 525.312237572  | -0.0544861 |  |
|            | 1576.611415862 | 13 | E   | 2  | 397.25366006   |            |  |
|            | 1689.695479842 | 14 | I   | 1  | 268.211066964  | -0.0849988 |  |
|            |                | 15 | K   | 0  | 155.127002984  |            |  |

Source: 20130212\_VR\_Bsu\_TripleSILAC\_pWTPPrkCPrpCReplicate3\_F21  
 Scannumber: 1623  
 Protein: BSU01230; rplP  
 Peptide Score: 89.27  
 Method: ITMS; CID; 3

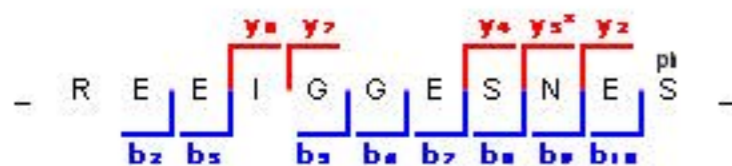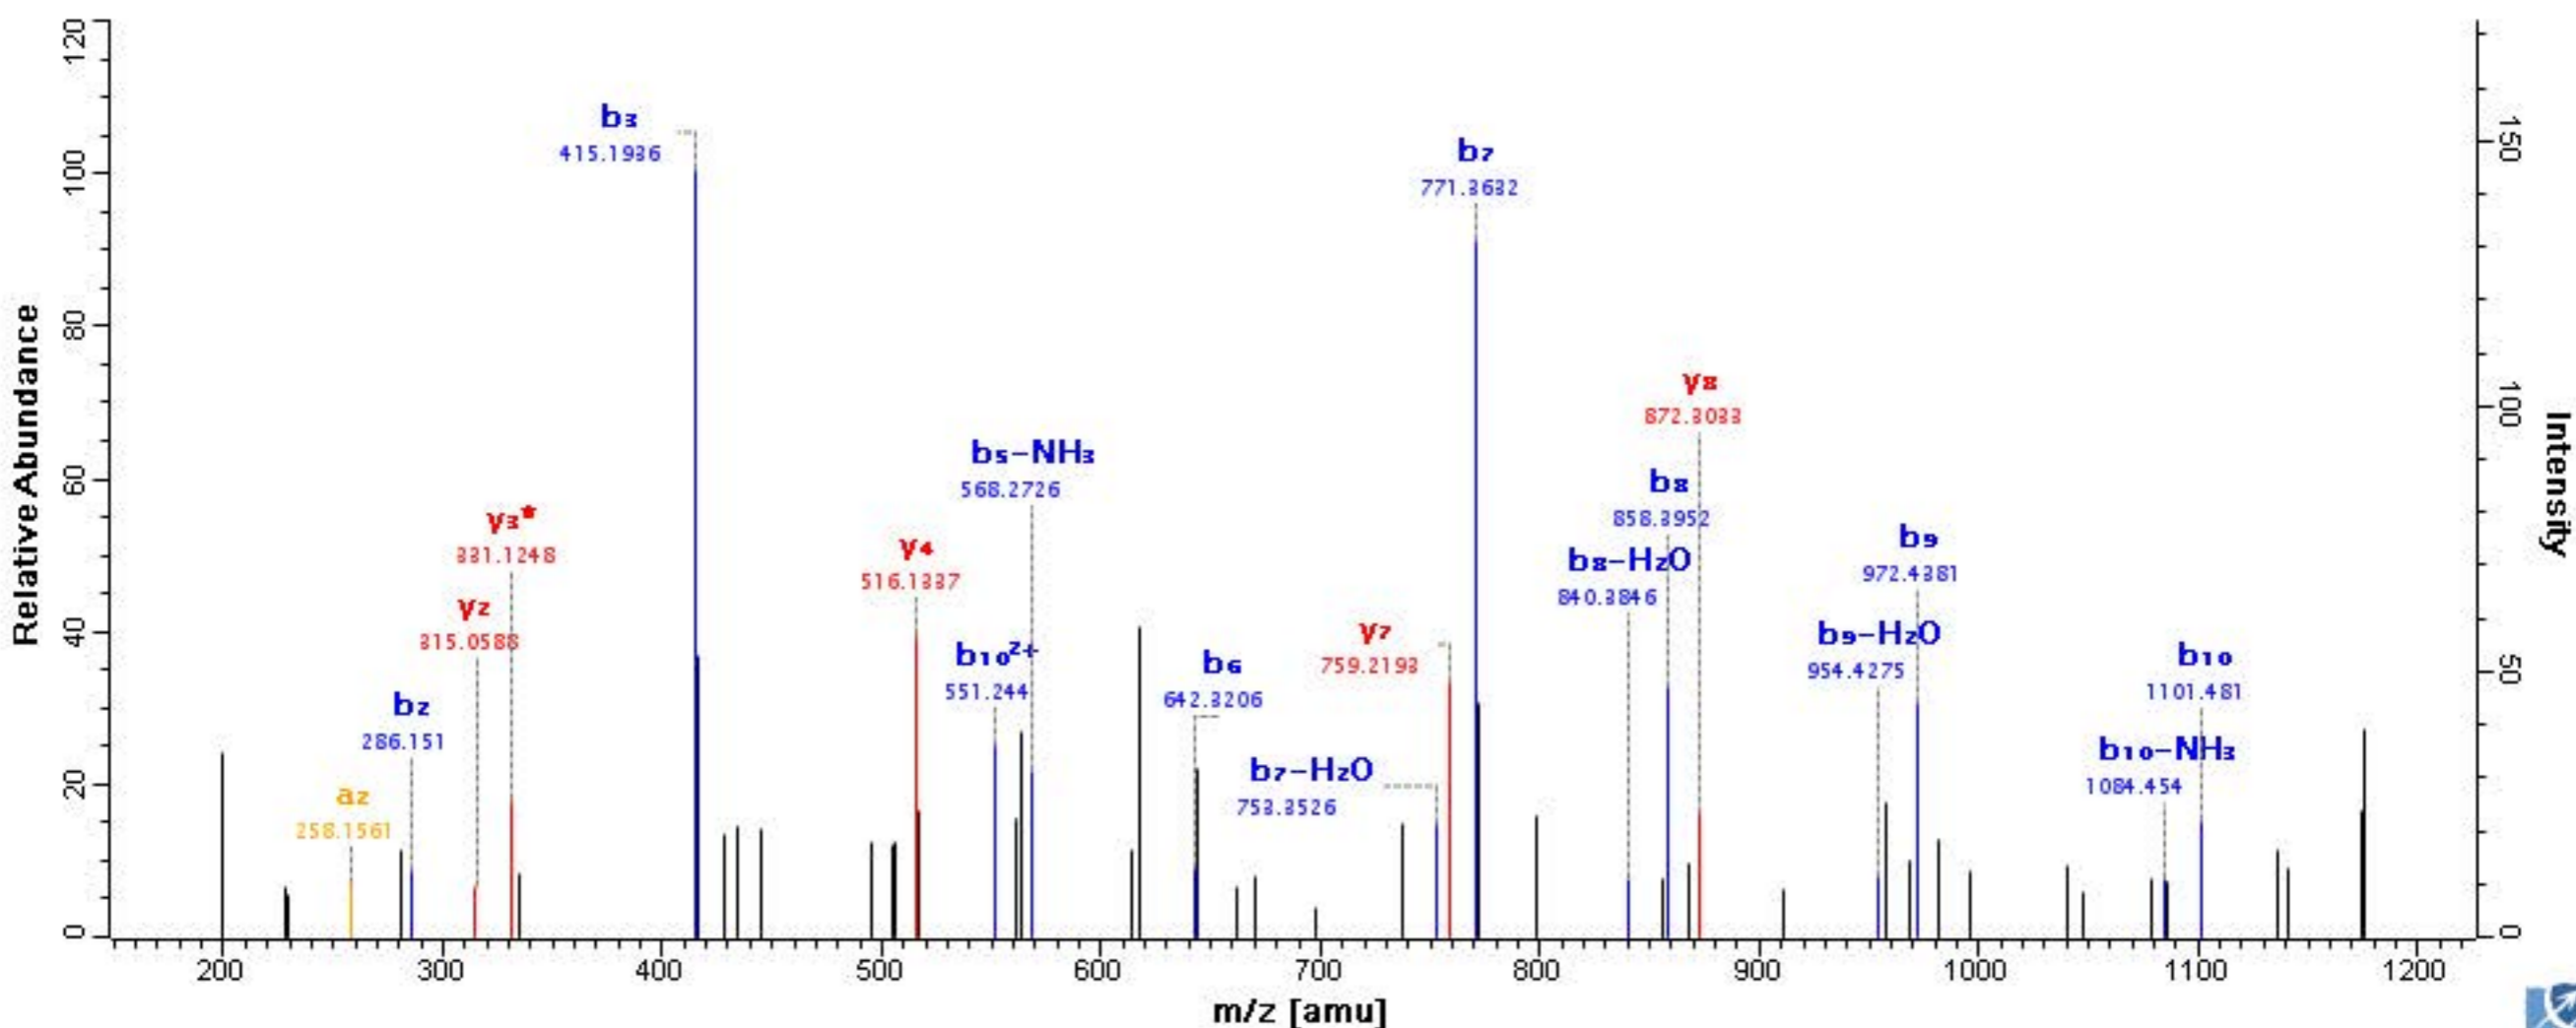

**precursor information**

|                   |                     |
|-------------------|---------------------|
| Mass:             | 1285.48205          |
| m/z:              | System.Collections. |
| Charge:           | System.Collections. |
| Retentiontime:    | System.Collections. |
| Score:            | 89.26604            |
| Mass Error [ppm]: | -0.23737            |
| PEP:              | 0.032461            |
| Precursor Type:   | ISO                 |

**general information**

|                       |             |
|-----------------------|-------------|
| Annotation:           | 9 of 11     |
| AminoAcids Coverag    | 82 %        |
| Intensity Coverage:   | 47 %        |
| Protein Localisation: | 134 ... 144 |

| a ion     |          | b <sup>2+</sup> ion |          | b ion     |          |    |     | y ion    |                    |
|-----------|----------|---------------------|----------|-----------|----------|----|-----|----------|--------------------|
| Δ dalton  | mass     | Δ dalton            | mass     | Δ dalton  | mass     |    | seq | Δ dalton | mass               |
|           | 129.1135 |                     | 157.1084 |           | 157.1084 | 1  | R   | 10       |                    |
| -0.347716 | 258.1561 |                     | 286.151  | -0.041728 | 286.151  | 2  | E   | 9        | 1130.389           |
|           | 387.1987 |                     | 415.1936 | +0.015533 | 415.1936 | 3  | E   | 8        | 1001.346           |
|           | 500.2827 |                     | 528.2776 |           | 528.2776 | 4  | I   | 7        | 872.3033 +0.087841 |
|           | 557.3042 |                     | 585.2991 |           | 585.2991 | 5  | G   | 6        | 759.2193 -0.118012 |
|           | 614.3257 |                     | 642.3206 | +0.086661 | 642.3206 | 6  | G   | 5        | 702.1978           |
|           | 743.3682 |                     | 771.3632 | +0.01764  | 771.3632 | 7  | E   | 4        | 645.1763           |
|           | 830.4003 |                     | 858.3952 | +0.085587 | 858.3952 | 8  | S   | 3        | 516.1337 -0.085348 |
|           | 944.4432 |                     | 972.4381 | -0.138126 | 972.4381 | 9  | N   | 2        | 429.1017           |
|           | 1073.486 | -0.175327           | 551.244  | -0.051142 | 1101.481 | 10 | E   | 1        | 315.0588 -0.185563 |
|           |          |                     |          |           |          | 11 | S   | 0        | 186.0162           |

Source: 20130212\_VR\_Bsu\_TripleSILAC\_pWTPPrkCPrpCReplicate3\_F21  
 Scannumber: 4203  
 Protein: BSU01320; rplR  
 Peptide Score: 130.4  
 Method: ITMS; CID; 3

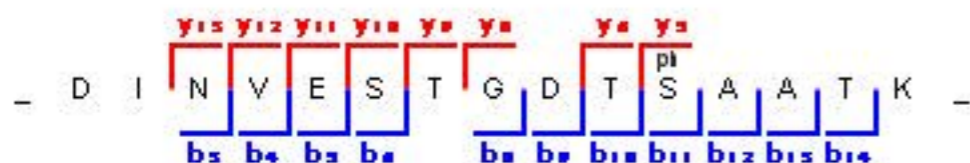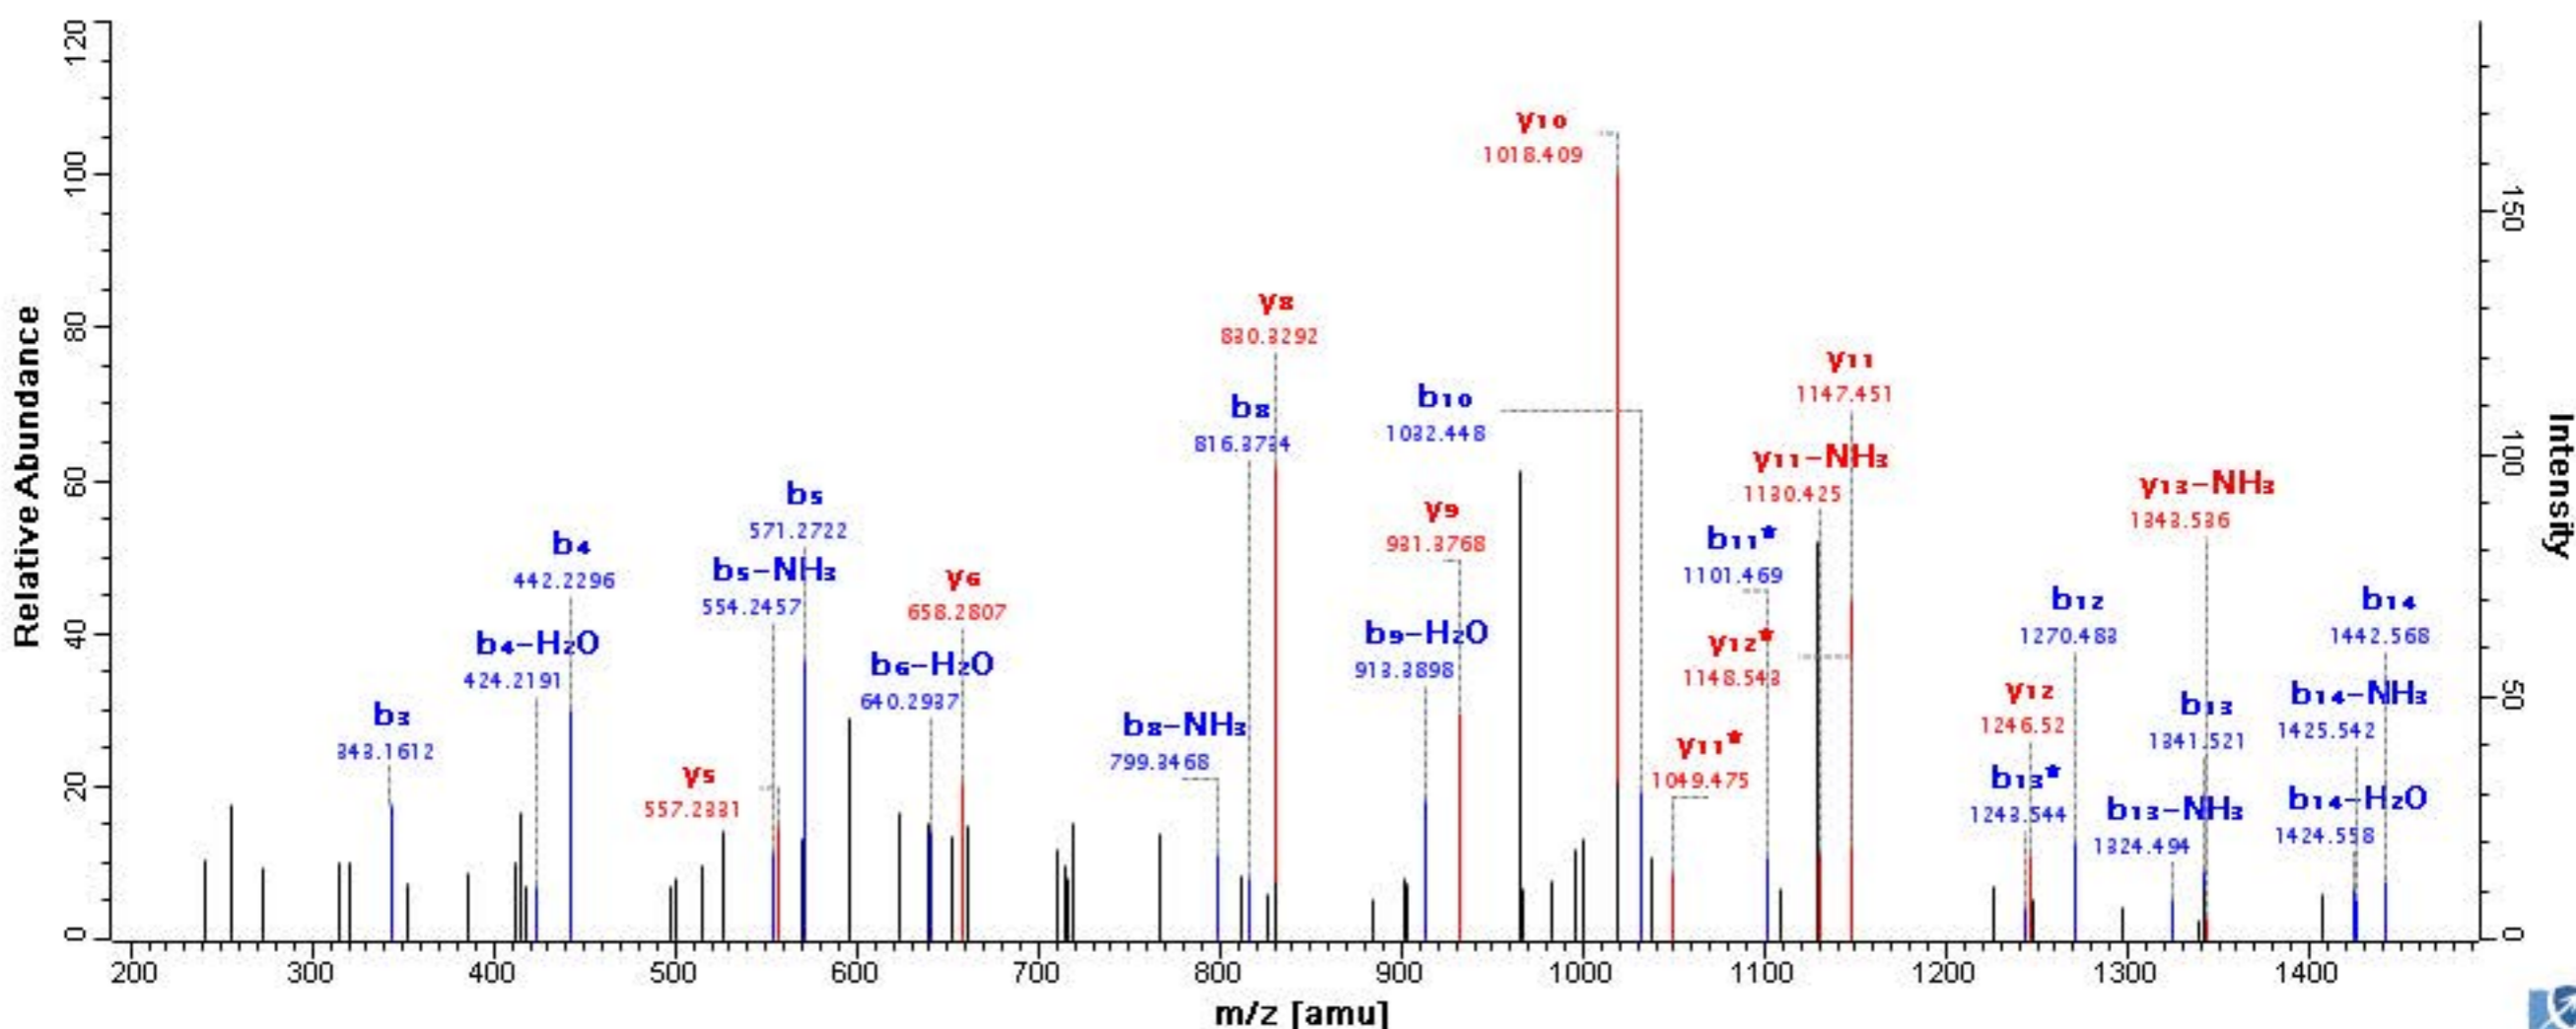

#### precursor information

|                   |                     |
|-------------------|---------------------|
| Mass:             | 1587.66683          |
| m/z:              | System.Collections. |
| Charge:           | System.Collections. |
| Retentiontime:    | System.Collections. |
| Score:            | 130.3962            |
| Mass Error [ppm]: | 0.1901              |
| PEP:              | 4.1804E-16          |
| Precursor Type:   | MULTI               |

#### general information

|                       |           |
|-----------------------|-----------|
| Annotation:           | 12 of 15  |
| AminoAcids Coverag    | 80 %      |
| Intensity Coverage:   | 49 %      |
| Protein Localisation: | 62 ... 76 |

| b ion      |                | seq |   |    |                | y ion      |      |
|------------|----------------|-----|---|----|----------------|------------|------|
| Δ dalton   | mass           |     |   |    |                | Δ dalton   | mass |
|            | 116.034219499  | 1   | D | 14 |                |            |      |
|            | 229.118283479  | 2   | I | 13 | 1473.646859592 |            |      |
| +0.3131543 | 343.161210926  | 3   | N | 12 | 1360.562795612 |            |      |
| -0.0120345 | 442.229624842  | 4   | V | 11 | 1246.519868165 | -0.0824902 |      |
| -0.2042858 | 571.272217939  | 5   | E | 10 | 1147.451454248 | -0.1355363 |      |
|            | 658.304246349  | 6   | S | 9  | 1018.408861152 | -0.0399647 |      |
|            | 759.351924823  | 7   | T | 8  | 931.376832742  | -0.0966203 |      |
| -0.0387938 | 816.373388546  | 8   | G | 7  | 830.329154268  | -0.12902   |      |
|            | 931.400331578  | 9   | D | 6  | 773.307690545  |            |      |
| +0.0297732 | 1032.448010052 | 10  | T | 5  | 658.280747513  | -0.0845805 |      |
|            | 1199.446368871 | 11  | S | 4  | 557.233069039  | -0.1251589 |      |
| -0.1382678 | 1270.483482658 | 12  | A | 3  | 390.23471022   |            |      |
| +0.1859465 | 1341.520596446 | 13  | A | 2  | 319.197596432  |            |      |
| +0.0175405 | 1442.56827492  | 14  | T | 1  | 248.160482645  |            |      |
|            |                | 15  | K | 0  | 147.112804171  |            |      |

Source: 20130212\_VR\_Bsu\_TripleSILAC\_pWTPPrkCPrpCReplicate3\_F21  
 Scannumber: 7039  
 Protein: BSU01770; glmM; ybbT  
 Peptide Score: 116.29  
 Method: ITMS; CID; 3

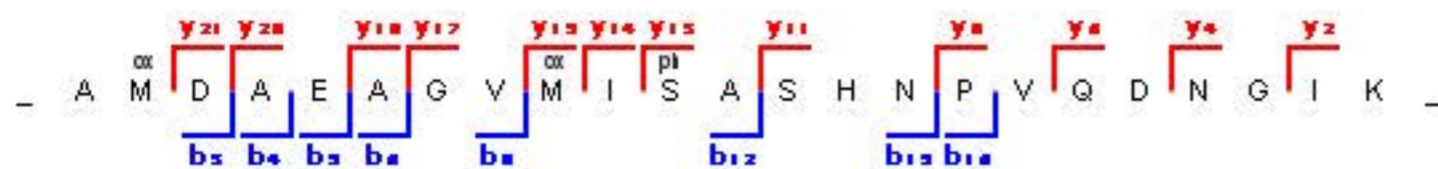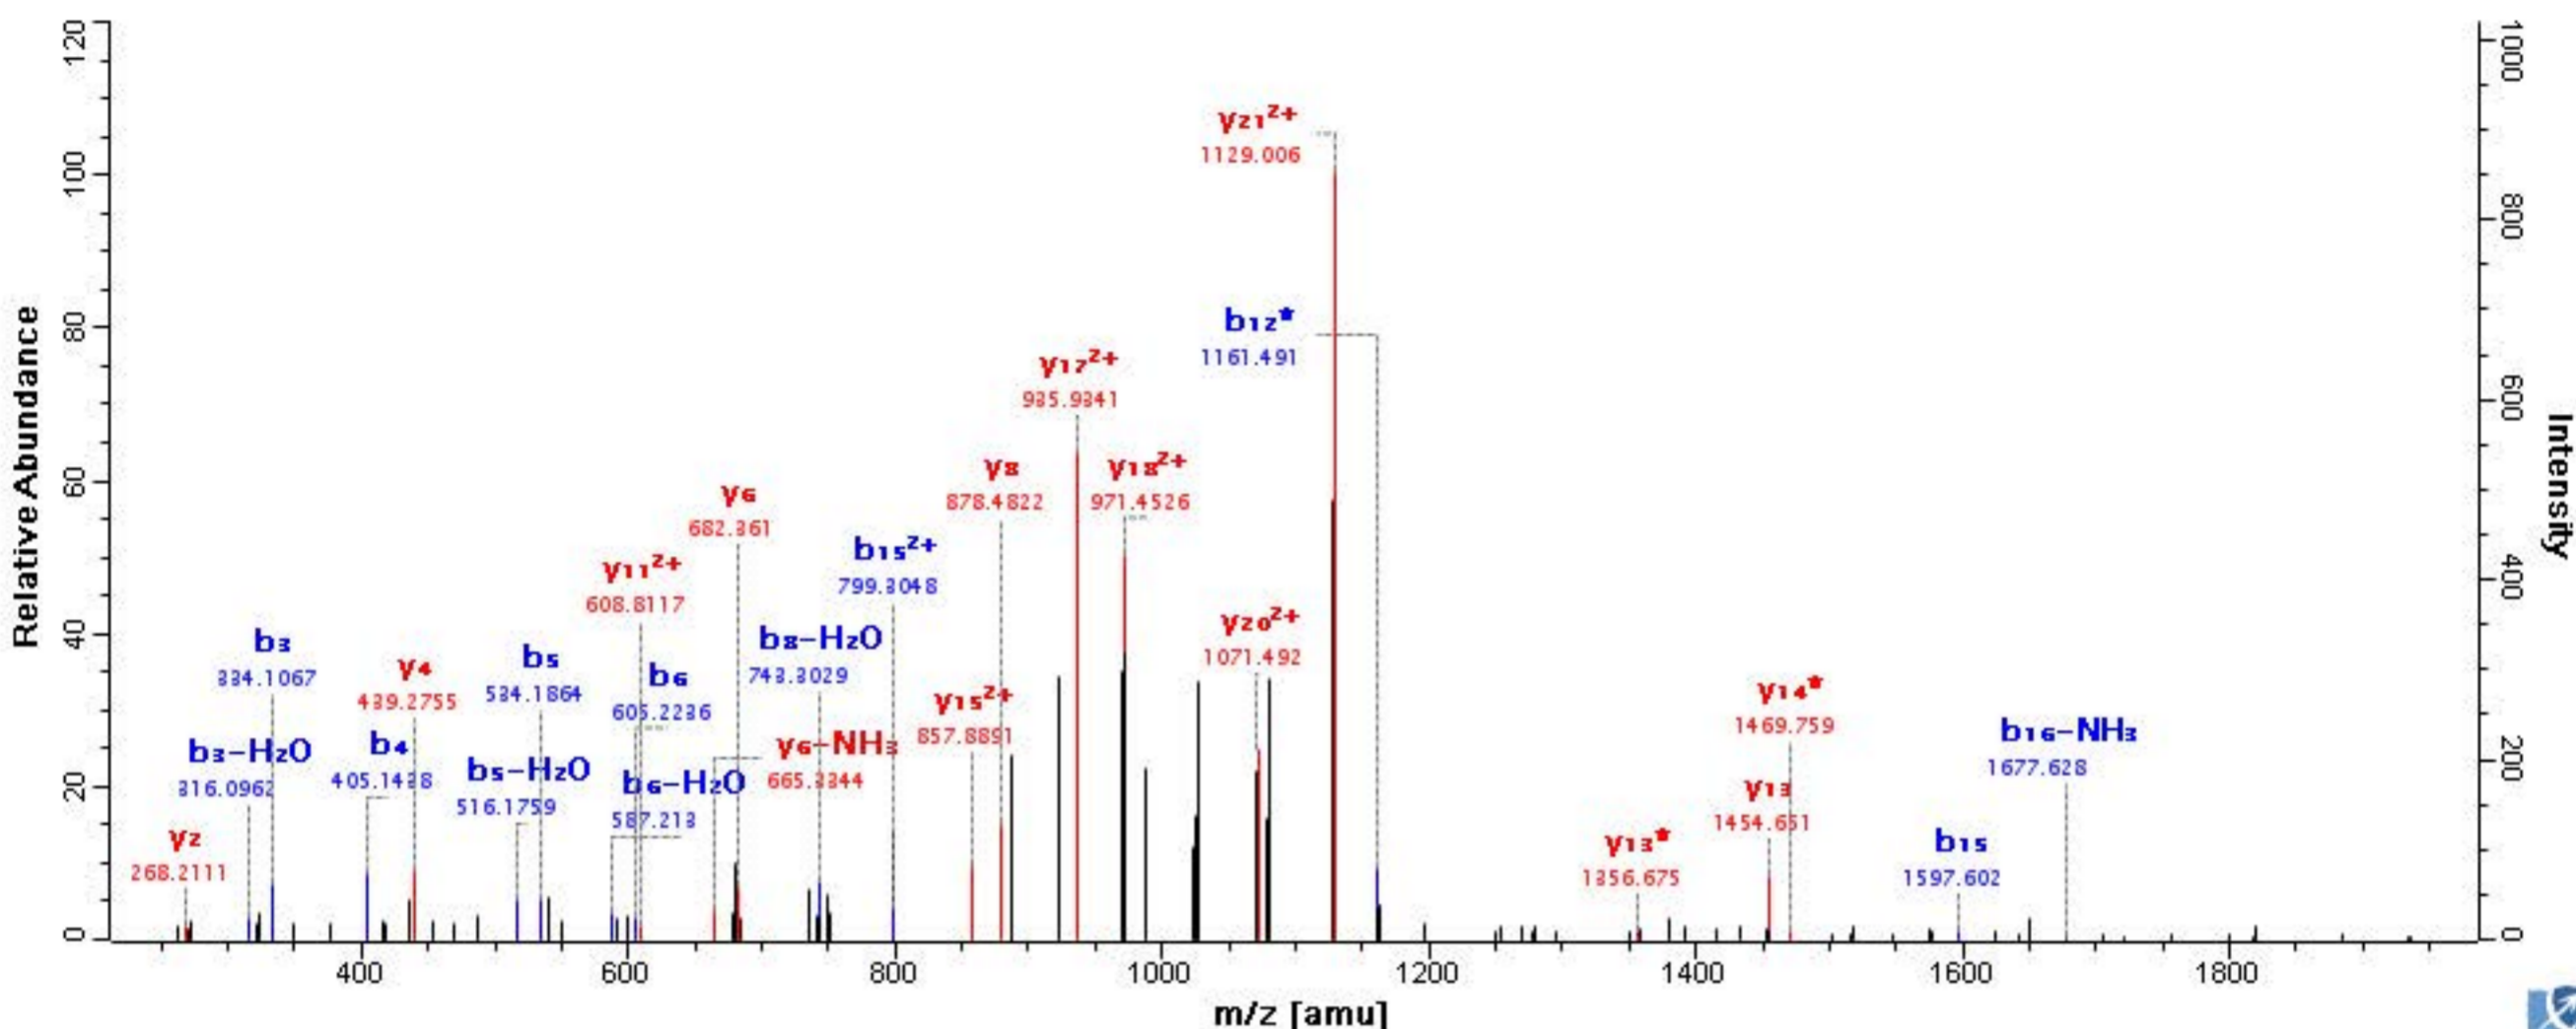

#### precursor information

|                   |                     |
|-------------------|---------------------|
| Mass:             | 2466.05475          |
| m/z:              | System.Collections. |
| Charge:           | System.Collections. |
| Retentiontime:    | System.Collections. |
| Score:            | 116.2923            |
| Mass Error [ppm]: | -0.35912            |
| PEP:              | 3.1534E-17          |
| Precursor Type:   | MULTI               |

| b <sup>2+</sup> ion |          | b ion           |          |    |     |    | y ion           |           | y <sup>2+</sup> ion |           |
|---------------------|----------|-----------------|----------|----|-----|----|-----------------|-----------|---------------------|-----------|
| $\Delta$ dalton     | mass     | $\Delta$ dalton | mass     |    | seq |    | $\Delta$ dalton | mass      | $\Delta$ dalton     | mass      |
|                     | 72.04439 |                 | 72.04439 | 1  | A   | 22 |                 |           |                     |           |
|                     | 219.0798 |                 | 219.0798 | 2  | M   | 21 | 2404.04         |           | 2404.04             |           |
|                     | 334.1067 | -0.177594       | 334.1067 | 3  | D   | 20 | 2257.005        |           | 1129.006            | +0.175213 |
|                     | 405.1438 | -0.081346       | 405.1438 | 4  | A   | 19 | 2141.978        |           | 1071.492            | +0.303675 |
|                     | 534.1864 | -0.054787       | 534.1864 | 5  | E   | 18 | 2070.941        |           | 2070.941            |           |
|                     | 605.2236 | +0.091144       | 605.2236 | 6  | A   | 17 | 1941.898        |           | 971.4526            | -0.083473 |
|                     | 662.245  |                 | 662.245  | 7  | G   | 16 | 1870.861        |           | 935.9341            | -0.044348 |
|                     | 761.3134 |                 | 761.3134 | 8  | V   | 15 | 1813.839        |           | 1813.839            |           |
|                     | 908.3488 |                 | 908.3488 | 9  | M   | 14 | 1714.771        |           | 857.8891            | +0.316631 |
|                     | 1021.433 |                 | 1021.433 | 10 | I   | 13 | 1567.736        |           | 1567.736            |           |
|                     | 1188.431 |                 | 1188.431 | 11 | S   | 12 | 1454.651        | -0.225105 | 1454.651            |           |
|                     | 1259.468 |                 | 1259.468 | 12 | A   | 11 | 1287.653        |           | 1287.653            |           |
|                     | 1346.5   |                 | 1346.5   | 13 | S   | 10 | 1216.616        |           | 608.8117            | -0.43665  |
|                     | 1483.559 |                 | 1483.559 | 14 | H   | 9  | 1129.584        |           | 1129.584            |           |
| -0.212592           | 799.3048 | -0.084046       | 1597.602 | 15 | N   | 8  | 992.5251        |           | 992.5251            |           |
|                     | 1694.655 |                 | 1694.655 | 16 | P   | 7  | 878.4822        | +0.077231 | 878.4822            |           |
|                     | 1793.723 |                 | 1793.723 | 17 | V   | 6  | 781.4294        |           | 781.4294            |           |
|                     | 1921.782 |                 | 1921.782 | 18 | Q   | 5  | 682.361         | +0.454878 | 682.361             |           |
|                     | 2036.809 |                 | 2036.809 | 19 | D   | 4  | 554.3024        |           | 554.3024            |           |
|                     | 2150.852 |                 | 2150.852 | 20 | N   | 3  | 439.2755        | -0.115607 | 439.2755            |           |
|                     | 2207.873 |                 | 2207.873 | 21 | G   | 2  | 325.2325        |           | 325.2325            |           |
|                     | 2320.957 |                 | 2320.957 | 22 | I   | 1  | 268.2111        | -0.264656 | 268.2111            |           |
|                     |          |                 |          | 23 | K   | 0  | 155.127         |           | 155.127             |           |

#### general information

|                       |            |
|-----------------------|------------|
| Annotation:           | 17 of 23   |
| AminoAcids Coverage:  | 74%        |
| Intensity Coverage:   | 41%        |
| Protein Localisation: | 88 ... 110 |

Source: 20130212\_VR\_Bsu\_TripleSILAC\_pWTPrkCPrpCReplicate3\_F22  
 Scannumber: 3905  
 Protein: BSU06030; groEL; groL; mopA  
 Peptide Score: 141.85  
 Method: ITMS; CID; 3

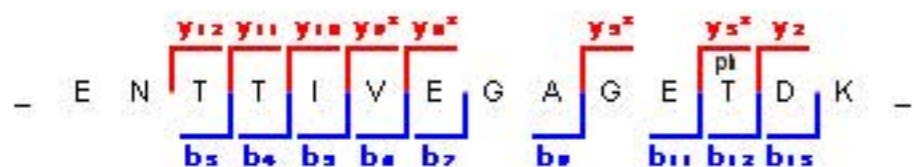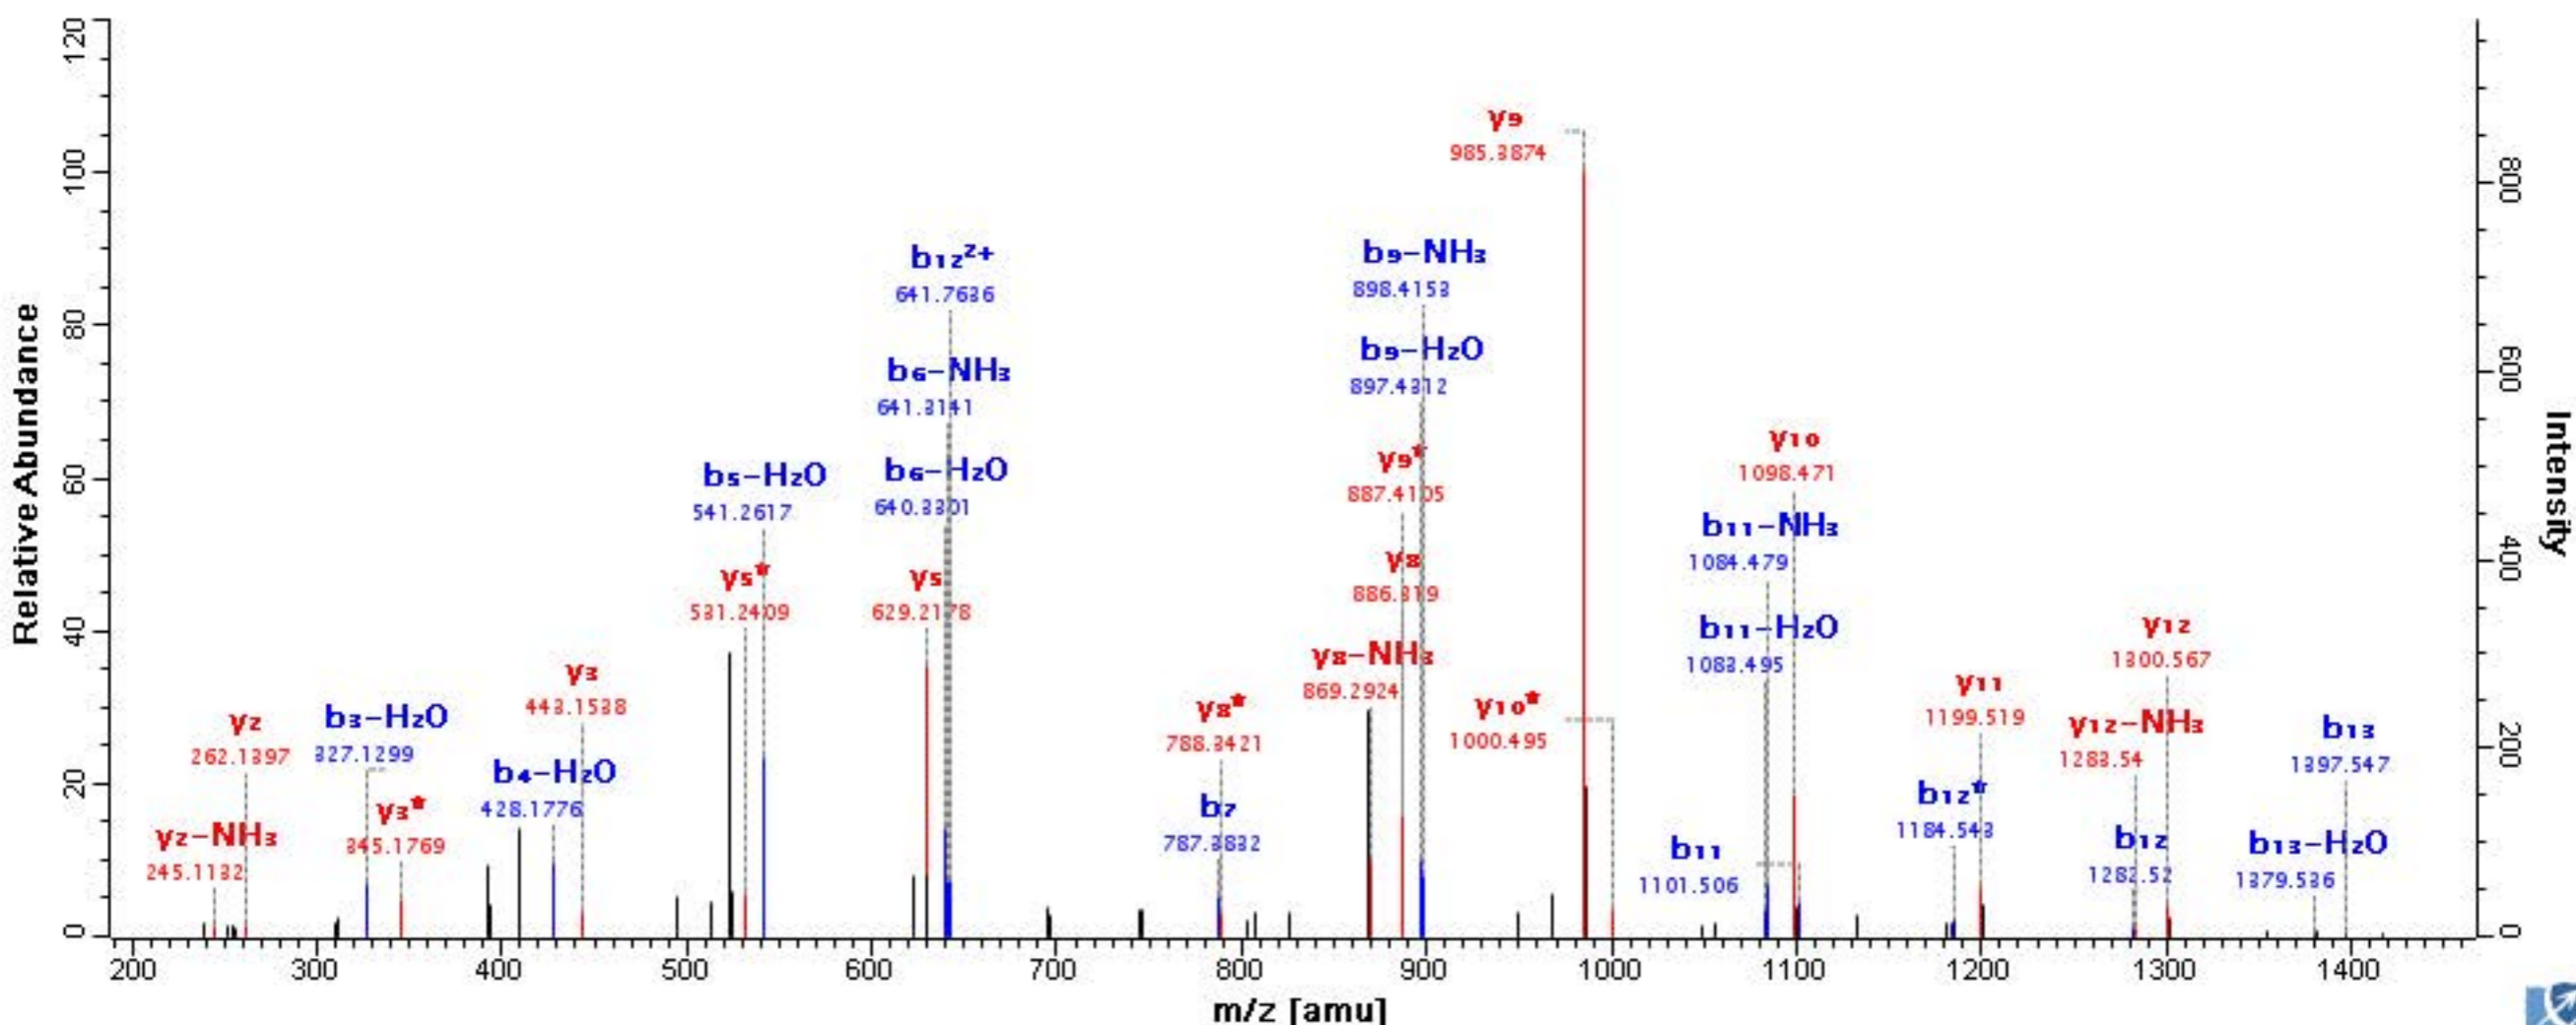

#### precursor information

|                   |                     |
|-------------------|---------------------|
| Mass:             | 1542.64474          |
| m/z:              | System.Collections. |
| Charge:           | System.Collections. |
| Retentiontime:    | System.Collections. |
| Score:            | 141.8514            |
| Mass Error [ppm]: | -0.21061            |
| PEP:              | 4.6994E-17          |
| Precursor Type:   | MULTI               |

#### general information

|                       |             |
|-----------------------|-------------|
| Annotation:           | 11 of 14    |
| AminoAcids Coverage:  | 79 %        |
| Intensity Coverage:   | 62 %        |
| Protein Localisation: | 326 ... 339 |

| b <sup>2+</sup> ion |              | b ion      |              |    |     |    | y ion        |            |
|---------------------|--------------|------------|--------------|----|-----|----|--------------|------------|
| Δ dalton            | mass         | Δ dalton   | mass         |    | seq |    | Δ dalton     | mass       |
|                     | 130.04986956 |            | 130.04986956 | 1  | E   | 13 |              |            |
|                     | 244.09279701 |            | 244.09279701 | 2  | N   | 12 | 1414.6097458 |            |
|                     | 345.14047548 |            | 345.14047548 | 3  | T   | 11 | 1300.5668184 | -0.11821   |
|                     | 446.18815396 |            | 446.18815396 | 4  | T   | 10 | 1199.5191399 | -0.1565911 |
|                     | 559.27221794 |            | 559.27221794 | 5  | I   | 9  | 1098.4714614 | +0.003148  |
|                     | 658.34063185 |            | 658.34063185 | 6  | V   | 8  | 985.38739743 | -0.0507275 |
|                     | 787.38322495 | -0.1762547 | 787.38322495 | 7  | E   | 7  | 886.31898351 | -0.031569  |
|                     | 844.40468867 |            | 844.40468867 | 8  | G   | 6  | 757.27639042 |            |
|                     | 915.44180246 |            | 915.44180246 | 9  | A   | 5  | 700.25492669 |            |
|                     | 972.46326619 |            | 972.46326619 | 10 | G   | 4  | 629.2178129  | -0.0777372 |
|                     | 1101.5058593 | -0.0515136 | 1101.5058593 | 11 | E   | 3  | 572.19634918 |            |
| +0.4116596          | 641.76357232 | -0.0240186 | 1282.5198682 | 12 | T   | 2  | 443.15375609 | -0.0327234 |
|                     | 1397.5468112 | -0.2261325 | 1397.5468112 | 13 | D   | 1  | 262.1397472  | +0.0071339 |
|                     |              |            |              | 14 | K   | 0  | 147.11280417 |            |

Source: 20130212\_VR\_Bsu\_TripleSILAC\_pWTPPrkCPrpCReplicate3\_F22  
 Scannumber: 4468  
 Protein: BSU06200; ydjH  
 Peptide Score: 107.97  
 Method: ITMS; CID; 3

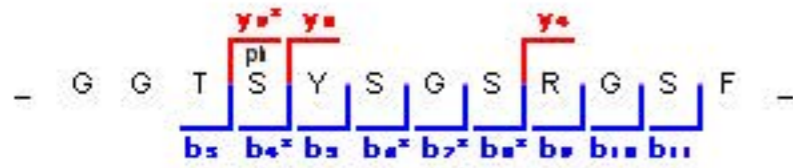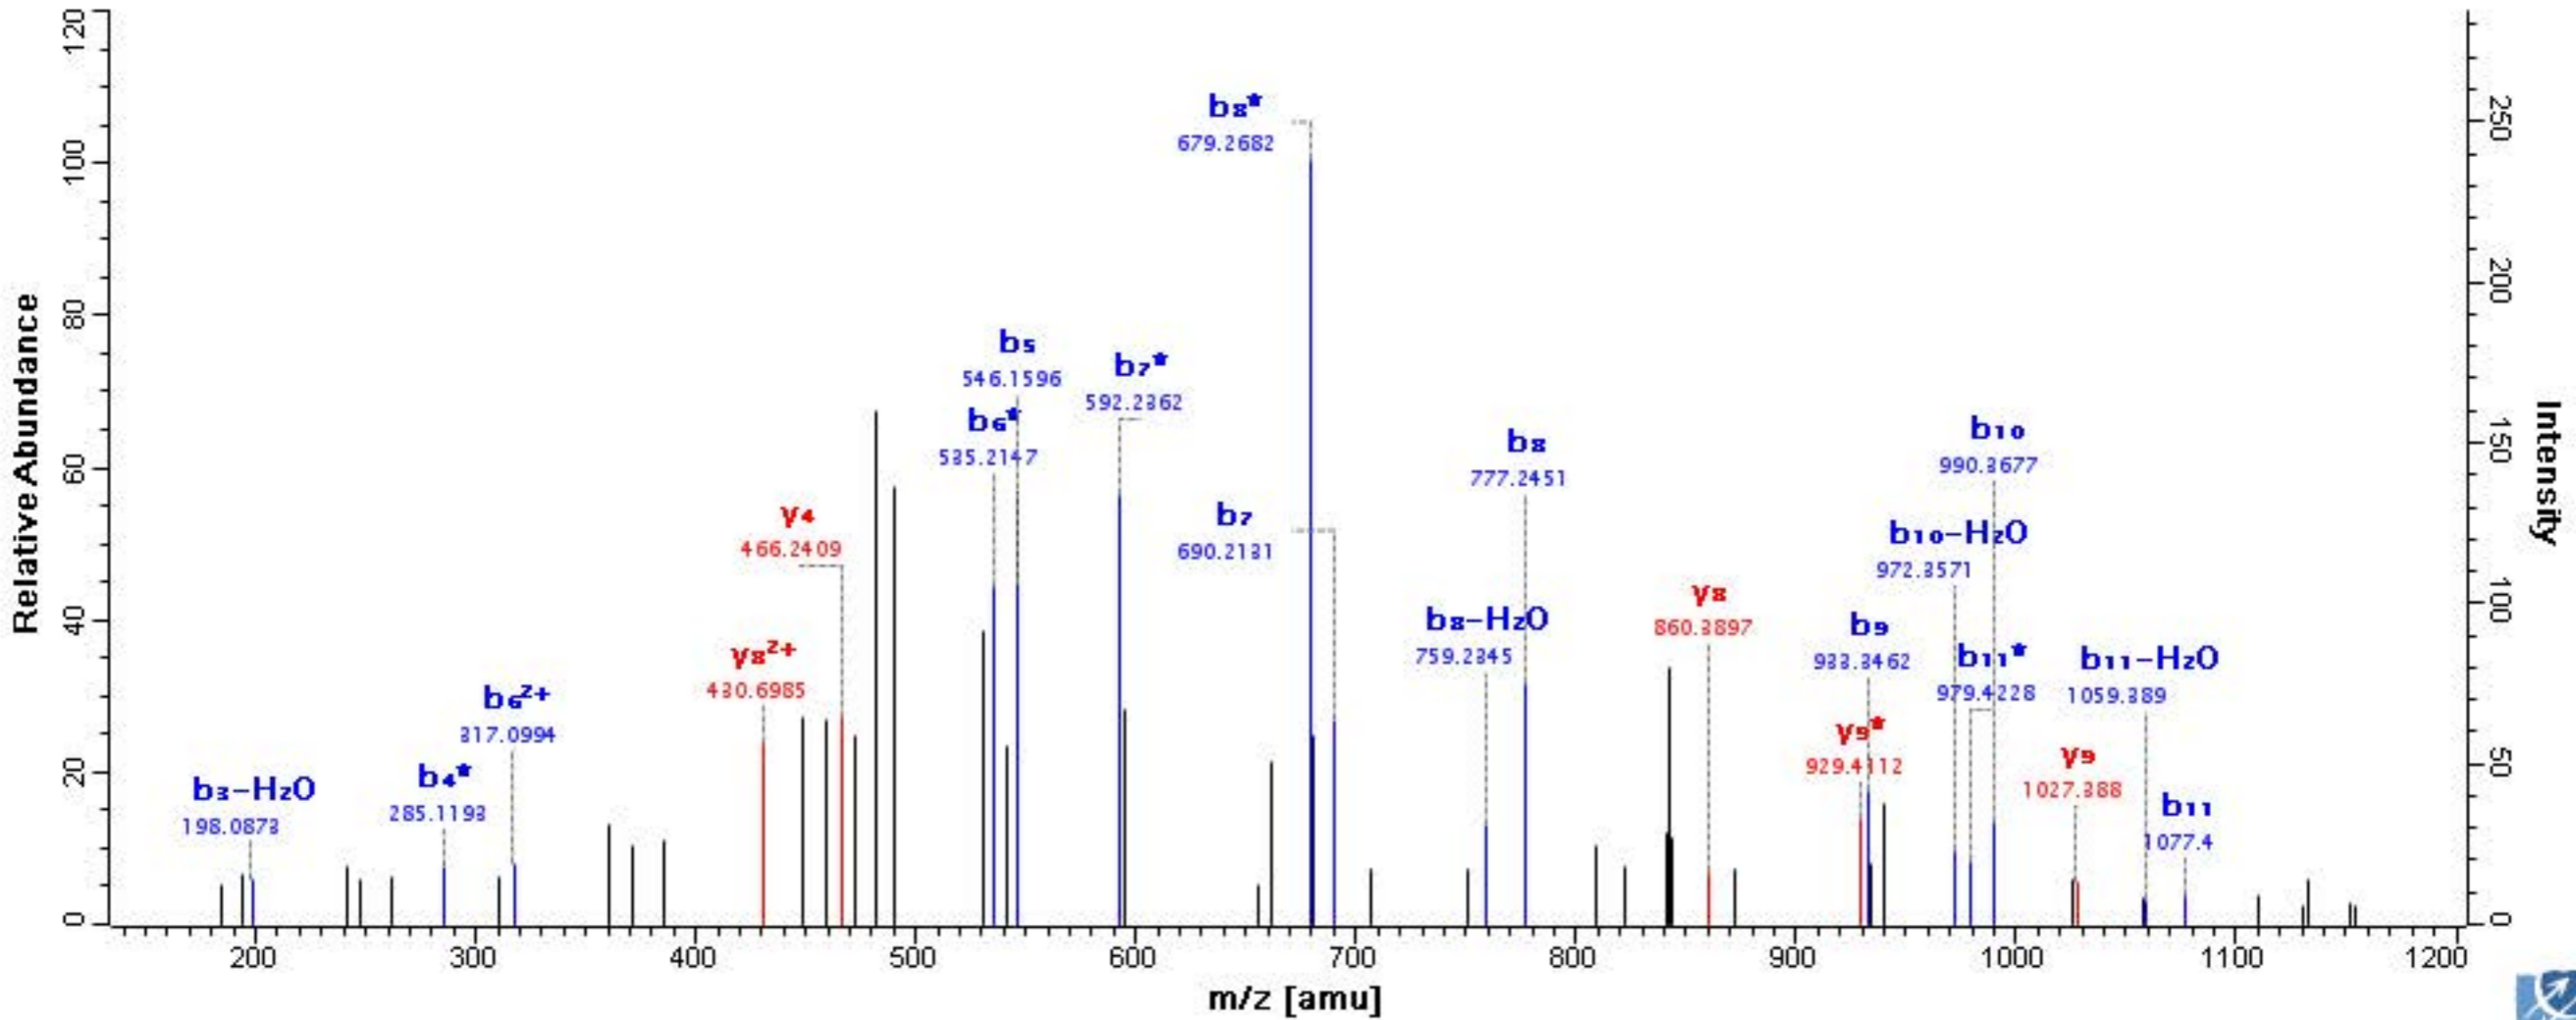

#### precursor information

|                   |                     |
|-------------------|---------------------|
| Mass:             | 1241.47151          |
| m/z:              | System.Collections. |
| Charge:           | System.Collections. |
| Retentiontime:    | System.Collections. |
| Score:            | 107.9664            |
| Mass Error [ppm]: | 0.09264             |
| PEP:              | 0.0030823           |
| Precursor Type:   | ISO                 |

#### general information

|                       |             |
|-----------------------|-------------|
| Annotation:           | 9 of 12     |
| AminoAcids Coverag    | 75 %        |
| Intensity Coverage:   | 42 %        |
| Protein Localisation: | 243 ... 254 |

| b <sup>2+</sup> ion |          | b ion     |          |    | seq |          | γ ion    |           | γ <sup>2+</sup> ion |           |
|---------------------|----------|-----------|----------|----|-----|----------|----------|-----------|---------------------|-----------|
| Δ dalton            | mass     | Δ dalton  | mass     |    |     | Δ dalton | mass     | Δ dalton  | mass                |           |
|                     | 58.02874 |           | 58.02874 | 1  | G   | 11       |          |           |                     |           |
|                     | 115.0502 |           | 115.0502 | 2  | G   | 10       | 1185.457 |           | 1185.457            |           |
|                     | 216.0979 |           | 216.0979 | 3  | T   | 9        | 1128.436 |           | 1128.436            |           |
|                     | 383.0962 |           | 383.0962 | 4  | S   | 8        | 1027.388 | +0.090205 | 1027.388            |           |
|                     | 546.1596 | +0.366981 | 546.1596 | 5  | Y   | 7        | 860.3897 | -0.047361 | 430.6985            | -0.432318 |
| +0.044362           | 317.0994 |           | 633.1916 | 6  | S   | 6        | 697.3264 |           | 697.3264            |           |
|                     | 690.2131 | -0.208118 | 690.2131 | 7  | G   | 5        | 610.2944 |           | 610.2944            |           |
|                     | 777.2451 | -0.026035 | 777.2451 | 8  | S   | 4        | 553.2729 |           | 553.2729            |           |
|                     | 933.3462 | -0.108225 | 933.3462 | 9  | R   | 3        | 466.2409 | -0.168898 | 466.2409            |           |
|                     | 990.3677 | -0.070485 | 990.3677 | 10 | G   | 2        | 310.1397 |           | 310.1397            |           |
|                     | 1077.4   | -0.135289 | 1077.4   | 11 | S   | 1        | 253.1183 |           | 253.1183            |           |
|                     |          |           |          | 12 | F   | 0        | 166.0863 |           | 166.0863            |           |

Source: 20130212\_VR\_Bsu\_TripleSILAC\_pWTPPrkCPrpCReplicate3\_F22  
 Scannumber: 7247  
 Protein: BSU02900; yceD  
 Peptide Score: 104.17  
 Method: ITMS; CID; 3

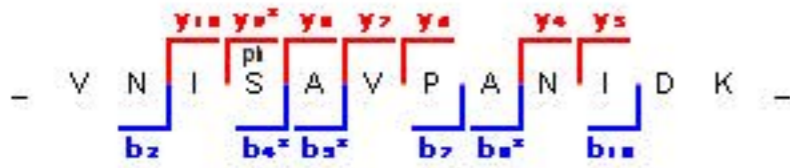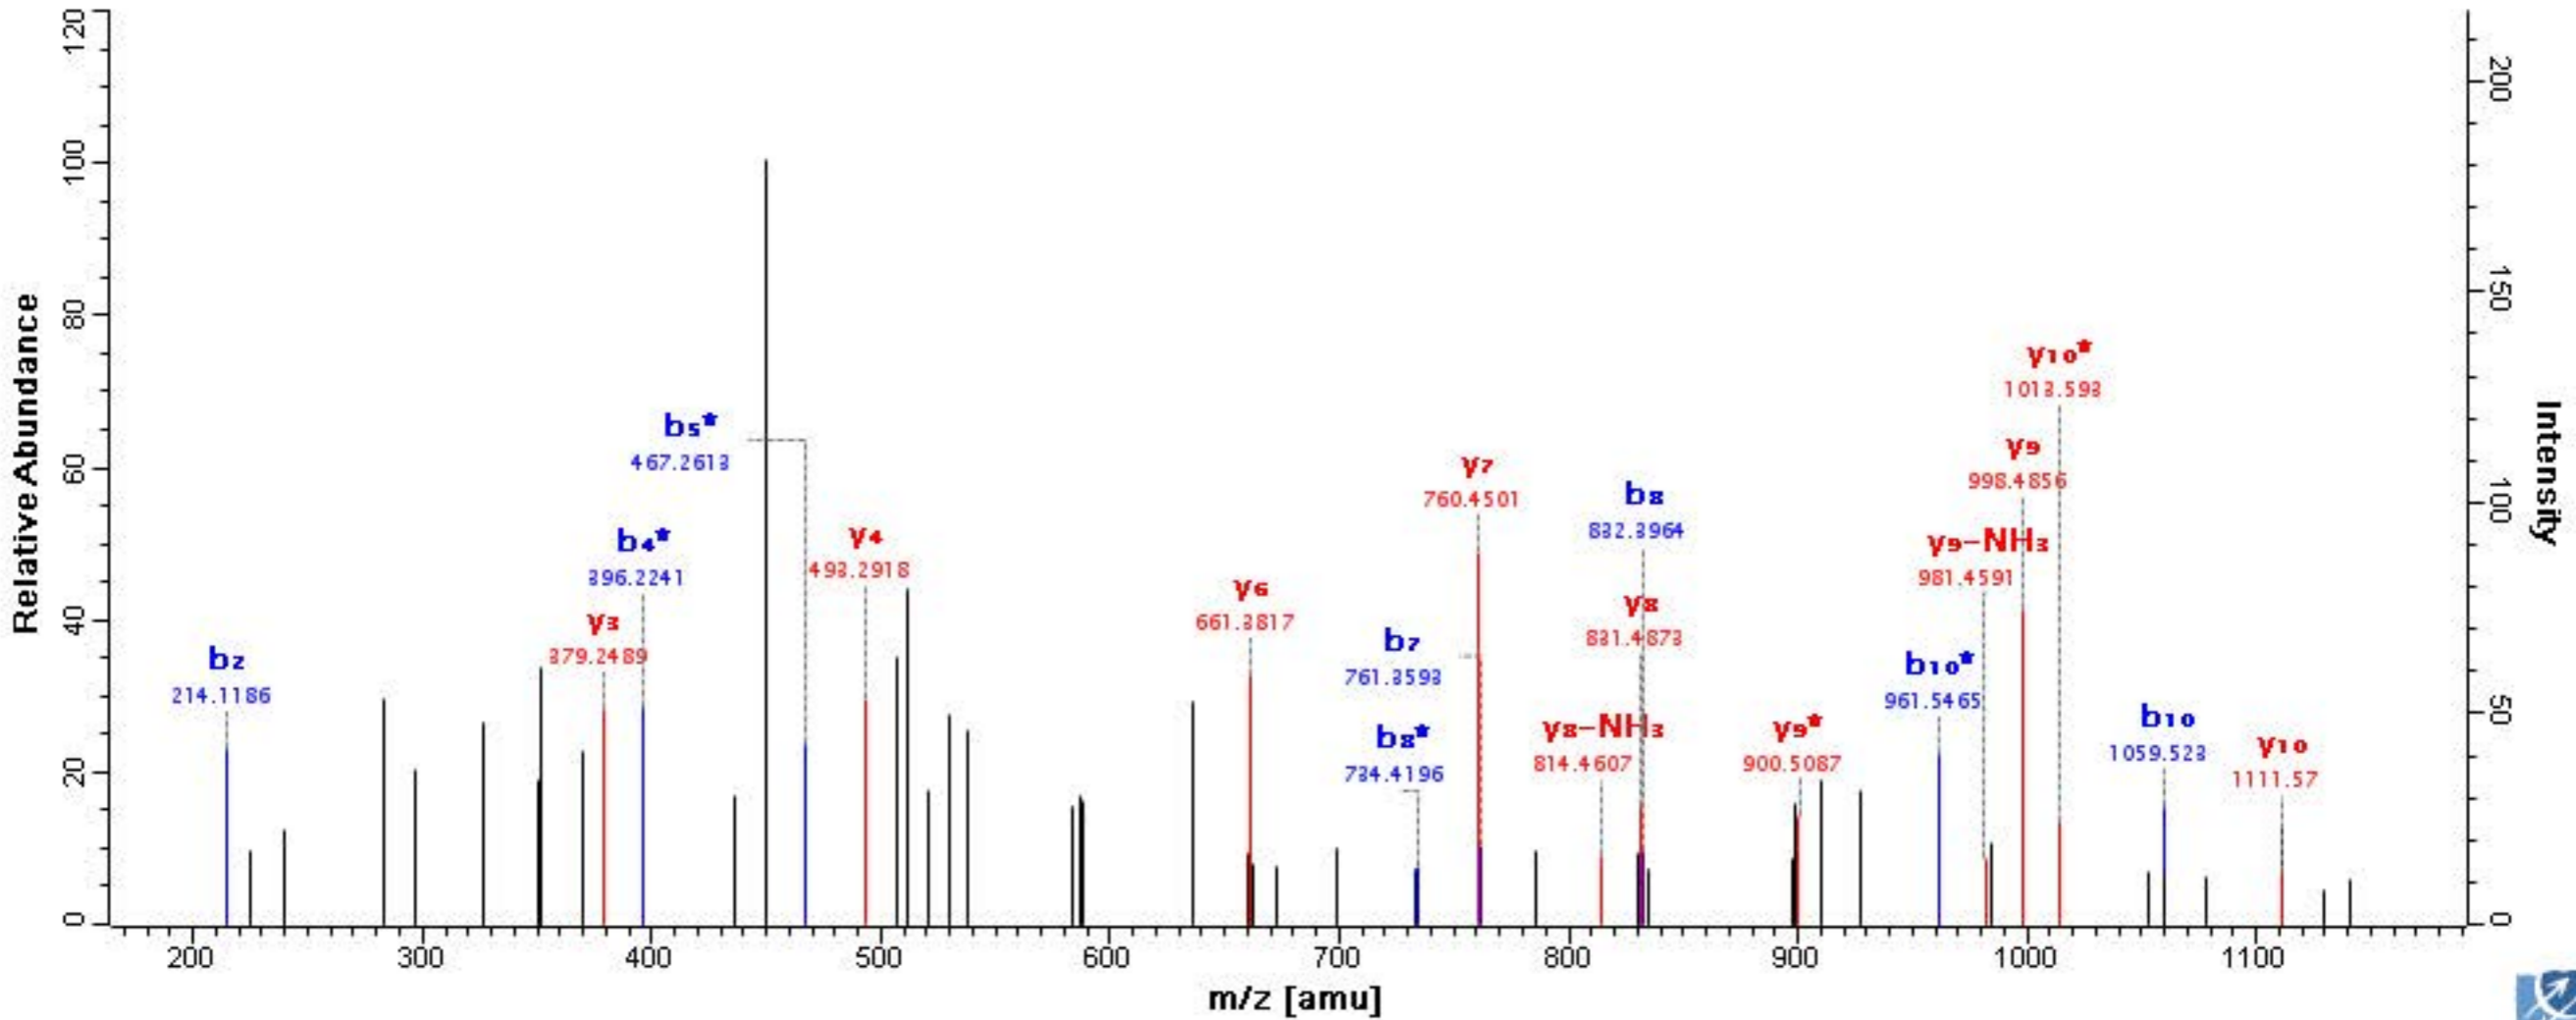

#### precursor information

|                   |                     |
|-------------------|---------------------|
| Mass:             | 1319.64877          |
| m/z:              | System.Collections. |
| Charge:           | System.Collections. |
| Retentiontime:    | System.Collections. |
| Score:            | 104.1745            |
| Mass Error [ppm]: | 0.10229             |
| PEP:              | 2.215E-05           |
| Precursor Type:   | MULTI               |

#### general information

|                       |            |
|-----------------------|------------|
| Annotation:           | 9 of 12    |
| AminoAcids Coverag    | 75 %       |
| Intensity Coverage:   | 36 %       |
| Protein Localisation: | 94 ... 105 |

| b ion      |                |    |     |    | y ion          |            |  |
|------------|----------------|----|-----|----|----------------|------------|--|
| Δ dalton   | mass           |    | seq |    | Δ dalton       | mass       |  |
|            | 100.075690383  | 1  | V   | 11 |                |            |  |
| +0.2449686 | 214.11861783   | 2  | N   | 10 | 1225.612601204 |            |  |
|            | 327.20268181   | 3  | I   | 9  | 1111.569673756 | +0.0216348 |  |
|            | 494.201040629  | 4  | S   | 8  | 998.485609776  | -0.1302021 |  |
|            | 565.238154416  | 5  | A   | 7  | 831.487250958  | -0.2440869 |  |
|            | 664.306568333  | 6  | V   | 6  | 760.45013717   | -0.099124  |  |
| -0.0520812 | 761.359332185  | 7  | P   | 5  | 661.381723254  | +0.0088407 |  |
| +0.1531756 | 832.396445972  | 8  | A   | 4  | 564.328959402  |            |  |
|            | 946.43937342   | 9  | N   | 3  | 493.291845614  | -0.094519  |  |
| +0.1550294 | 1059.5234374   | 10 | I   | 2  | 379.248918167  | +0.0420364 |  |
|            | 1174.550380432 | 11 | D   | 1  | 266.164854186  |            |  |
|            |                | 12 | K   | 0  | 151.137911154  |            |  |



Source: 20130212\_VR\_Bsu\_TripleSILAC\_pWTPPrkCPrpCReplicate3\_F23  
 Scannumber: 10955  
 Protein: BSU02360; gamA; ybfT  
 Peptide Score: 156.11  
 Method: ITMS; CID; 3

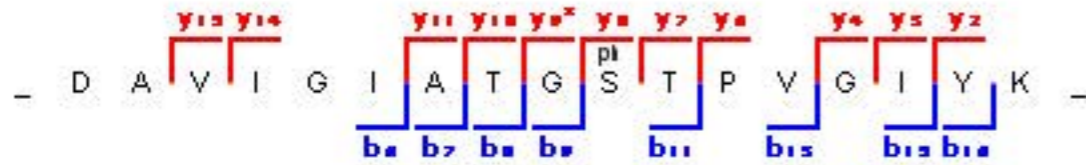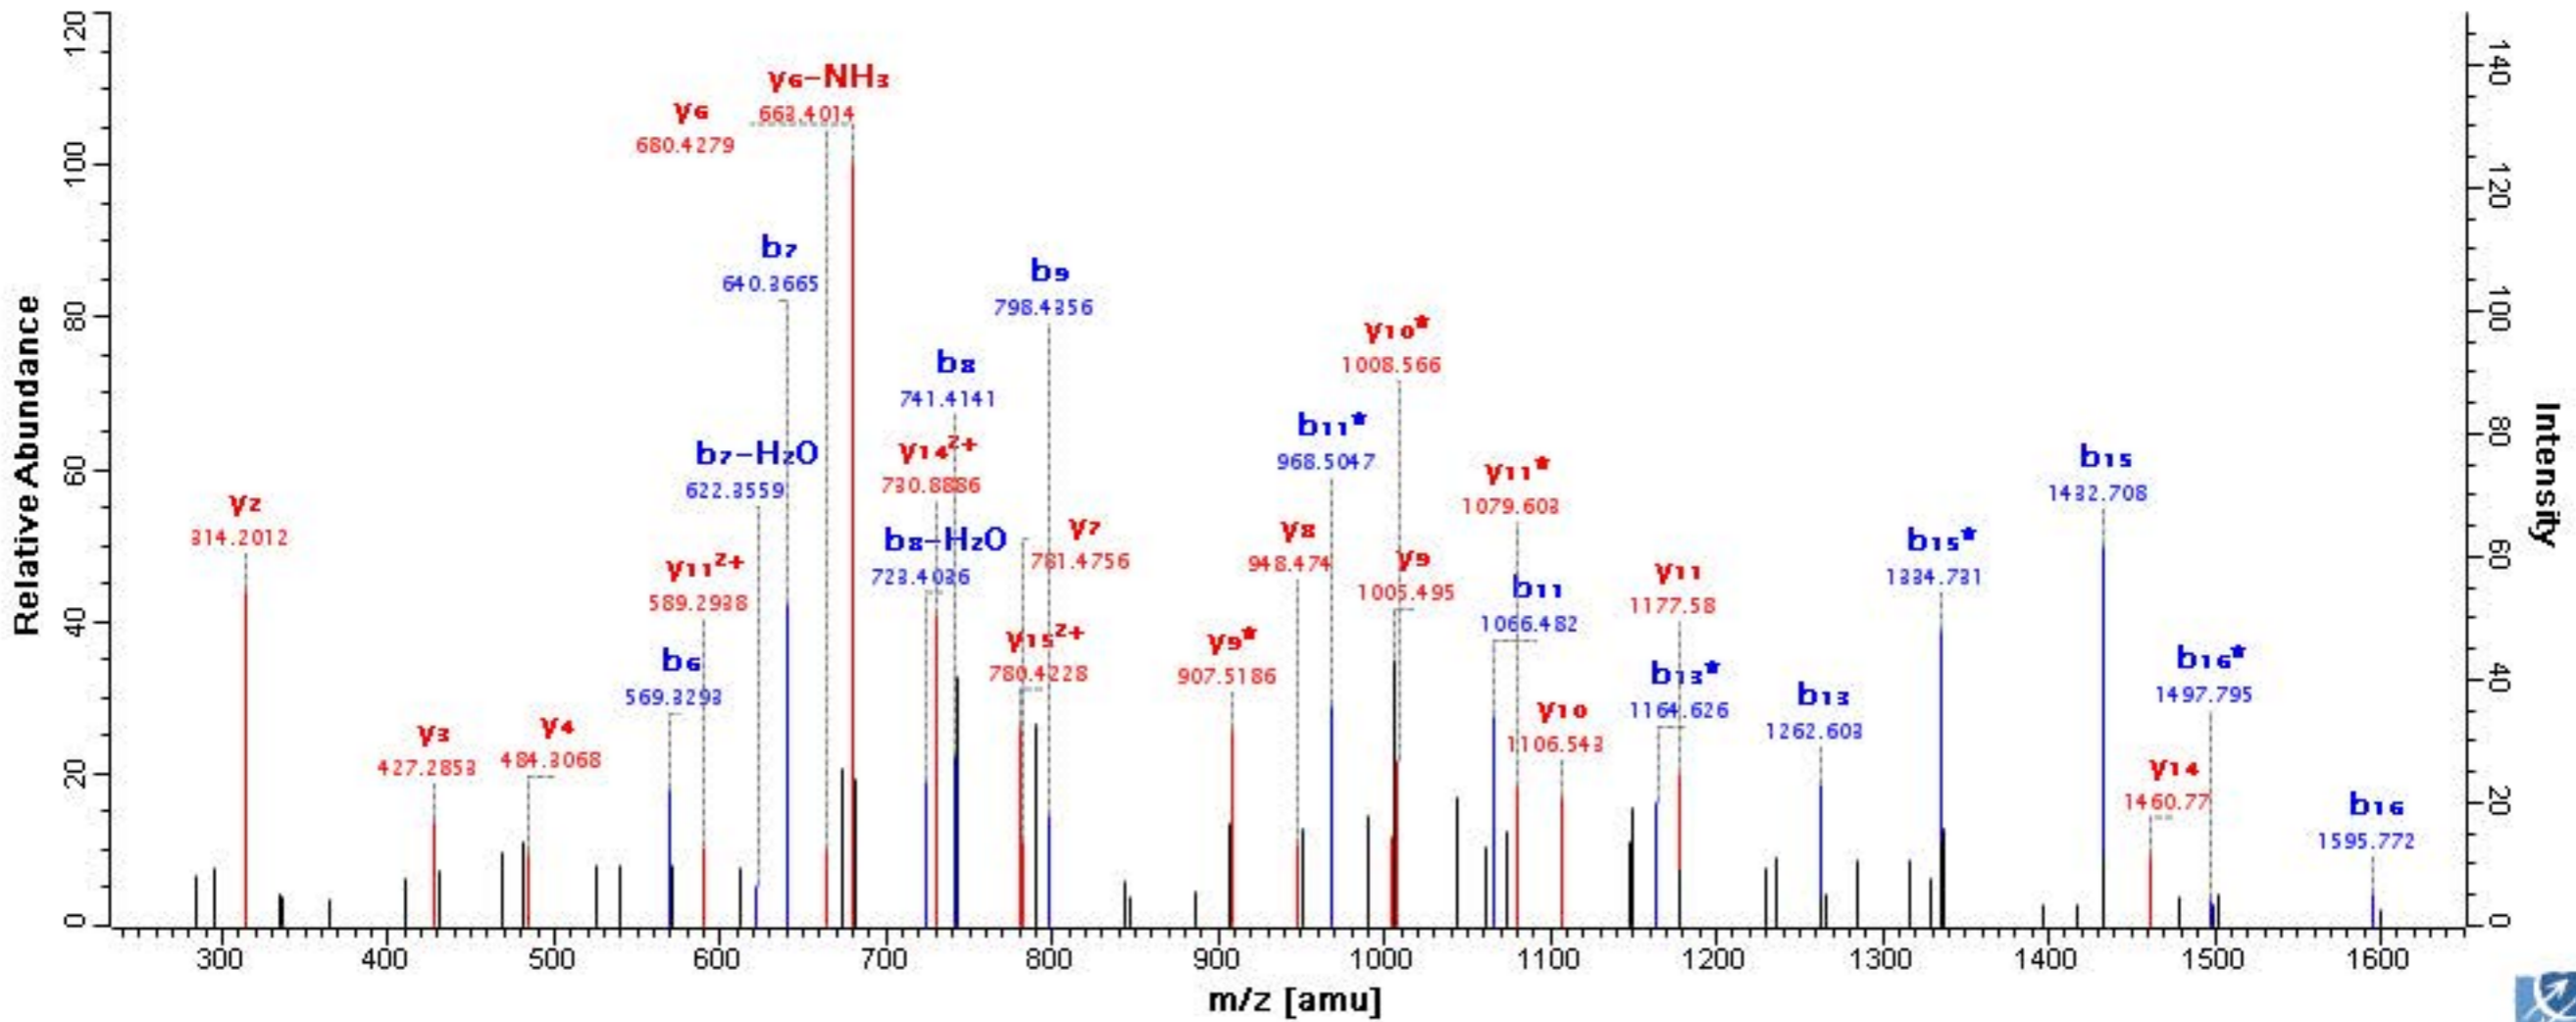

#### precursor information

|                   |                     |
|-------------------|---------------------|
| Mass:             | 1740.86992          |
| m/z:              | System.Collections. |
| Charge:           | System.Collections. |
| Retentiontime:    | System.Collections. |
| Score:            | 156.114             |
| Mass Error [ppm]: | 0.0018236           |
| PEP:              | 8.1091E-26          |
| Precursor Type:   | MULTI               |

| b ion      |              |    |     |    | y ion        |            | y <sup>2+</sup> ion |            |
|------------|--------------|----|-----|----|--------------|------------|---------------------|------------|
| Δ dalton   | mass         |    | seq |    | Δ dalton     | mass       | Δ dalton            | mass       |
|            | 116.0342195  | 1  | D   | 16 |              |            |                     |            |
|            | 187.07133329 | 2  | A   | 15 | 1630.8753578 |            | 1630.8753578        |            |
|            | 286.1397472  | 3  | V   | 14 | 1559.838244  |            | 780.42276025        | -0.196564  |
|            | 399.22381118 | 4  | I   | 13 | 1460.7698301 | +0.3384462 | 730.8885533         | -0.0559117 |
|            | 456.24527491 | 5  | G   | 12 | 1347.6857661 |            | 1347.6857661        |            |
| -0.0002373 | 569.32933889 | 6  | I   | 11 | 1290.6643024 |            | 1290.6643024        |            |
| -0.1884131 | 640.36645267 | 7  | A   | 10 | 1177.5802384 | +0.0413436 | 589.29375745        | +0.2542772 |
| +0.0086594 | 741.41413115 | 8  | T   | 9  | 1106.5431247 | -0.2530856 | 1106.5431247        |            |
| +0.2086312 | 798.43559487 | 9  | G   | 8  | 1005.4954462 | -0.4678583 | 1005.4954462        |            |
|            | 965.43395369 | 10 | S   | 7  | 948.47398246 | -0.1529986 | 948.47398246        |            |
| -0.1525306 | 1066.4816322 | 11 | T   | 6  | 781.47562364 | -0.014381  | 781.47562364        |            |
|            | 1163.534396  | 12 | P   | 5  | 680.42794516 | -0.070096  | 680.42794516        |            |
| -0.2728539 | 1262.6028099 | 13 | V   | 4  | 583.37518131 |            | 583.37518131        |            |
|            | 1319.6242737 | 14 | G   | 3  | 484.3067674  | +0.0950881 | 484.3067674         |            |
| -0.071741  | 1432.7083376 | 15 | I   | 2  | 427.28530367 | -0.1512705 | 427.28530367        |            |
| +0.2785047 | 1595.7716662 | 16 | Y   | 1  | 314.20123969 | -0.0092841 | 314.20123969        |            |
|            |              | 17 | K   | 0  | 151.13791115 |            | 151.13791115        |            |

#### general information

|                       |           |
|-----------------------|-----------|
| Annotation:           | 13 of 17  |
| AminoAcids Coverag    | 76 %      |
| Intensity Coverage:   | 61 %      |
| Protein Localisation: | 29 ... 45 |

Source: 20130212\_VR\_Bsu\_TripleSILAC\_pWTPPrkCPrpCReplicate3\_F23  
 Scannumber: 11484  
 Protein: BSU11720; fabI; yjbW  
 Peptide Score: 66.56  
 Method: ITMS; CID; 3

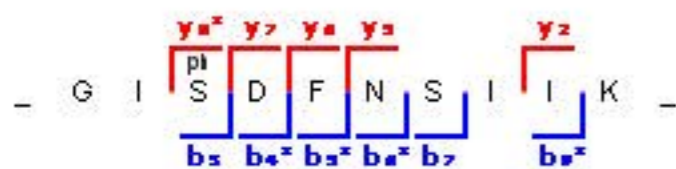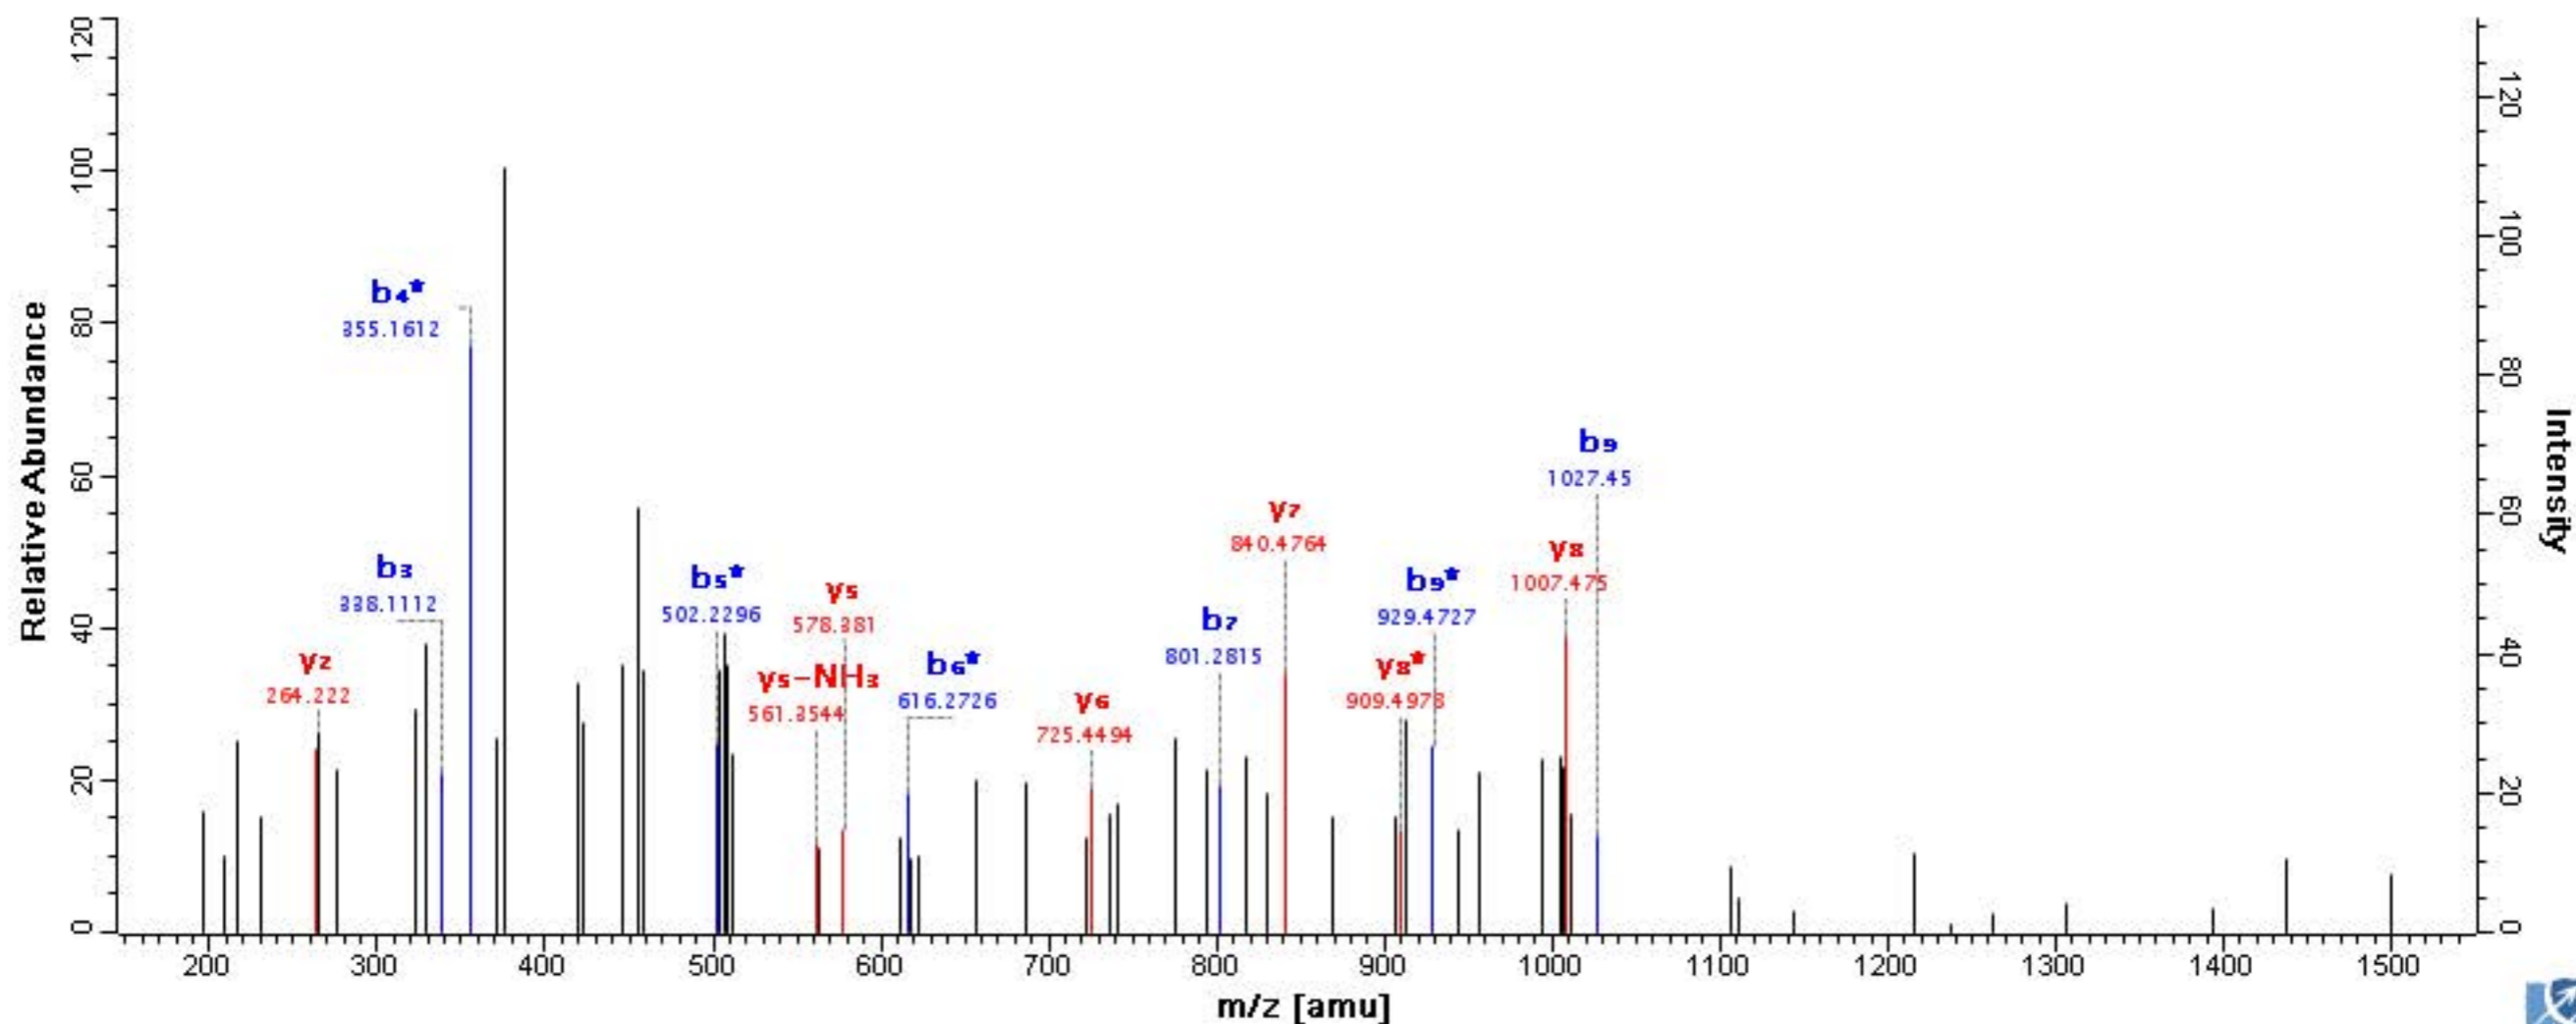

**precursor information**

|                   |                     |
|-------------------|---------------------|
| Mass:             | 1172.54759          |
| m/z:              | System.Collections. |
| Charge:           | System.Collections. |
| Retentiontime:    | System.Collections. |
| Score:            | 66.55987            |
| Mass Error [ppm]: | -0.22144            |
| PEP:              | 0.016053            |
| Precursor Type:   | MULTI               |

**general information**

|                       |             |
|-----------------------|-------------|
| Annotation:           | 6 of 10     |
| AminoAcids Coverage:  | 60 %        |
| Intensity Coverage:   | 25 %        |
| Protein Localisation: | 201 ... 210 |

| b ion           |                |    |     |   | y ion           |            |
|-----------------|----------------|----|-----|---|-----------------|------------|
| $\Delta$ dalton | mass           |    | seq |   | $\Delta$ dalton | mass       |
|                 | 58.02874019    | 1  | G   | 9 |                 |            |
|                 | 171.112804171  | 2  | I   | 8 | 1120.558774719  |            |
| -0.0080746      | 338.111162989  | 3  | S   | 7 | 1007.474710739  | +0.0345056 |
|                 | 453.138106021  | 4  | D   | 6 | 840.47635192    | -0.1316864 |
|                 | 600.206519937  | 5  | F   | 5 | 725.449408888   | -0.2241281 |
|                 | 714.249447384  | 6  | N   | 4 | 578.380994972   | -0.4616834 |
| -4.27E-05       | 801.281475794  | 7  | S   | 3 | 464.338067525   |            |
|                 | 914.365539775  | 8  | I   | 2 | 377.306039115   |            |
| -0.1639592      | 1027.449603755 | 9  | I   | 1 | 264.221975135   | -0.431875  |
|                 |                | 10 | K   | 0 | 151.137911154   |            |

Source: 20130212\_VR\_Bsu\_TripleSILAC\_pWTPPrkCPrpCReplicate3\_F23  
 Scannumber: 12114  
 Protein: BSU05740; phoAIII; phoB  
 Peptide Score: 45.02  
 Method: ITMS; CID; 3

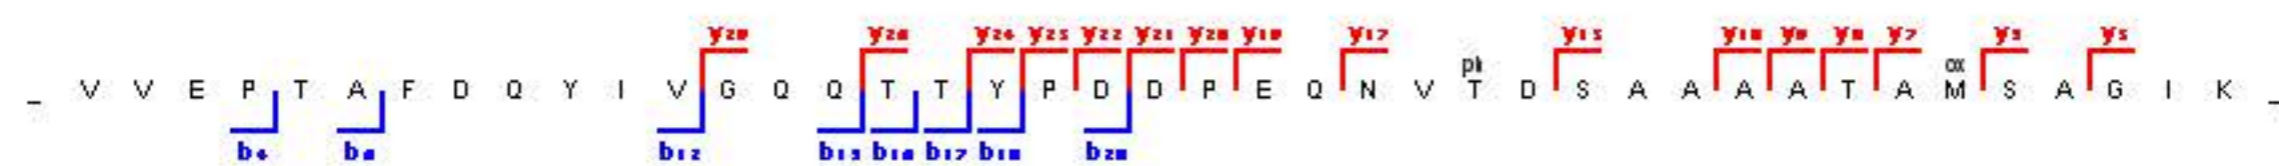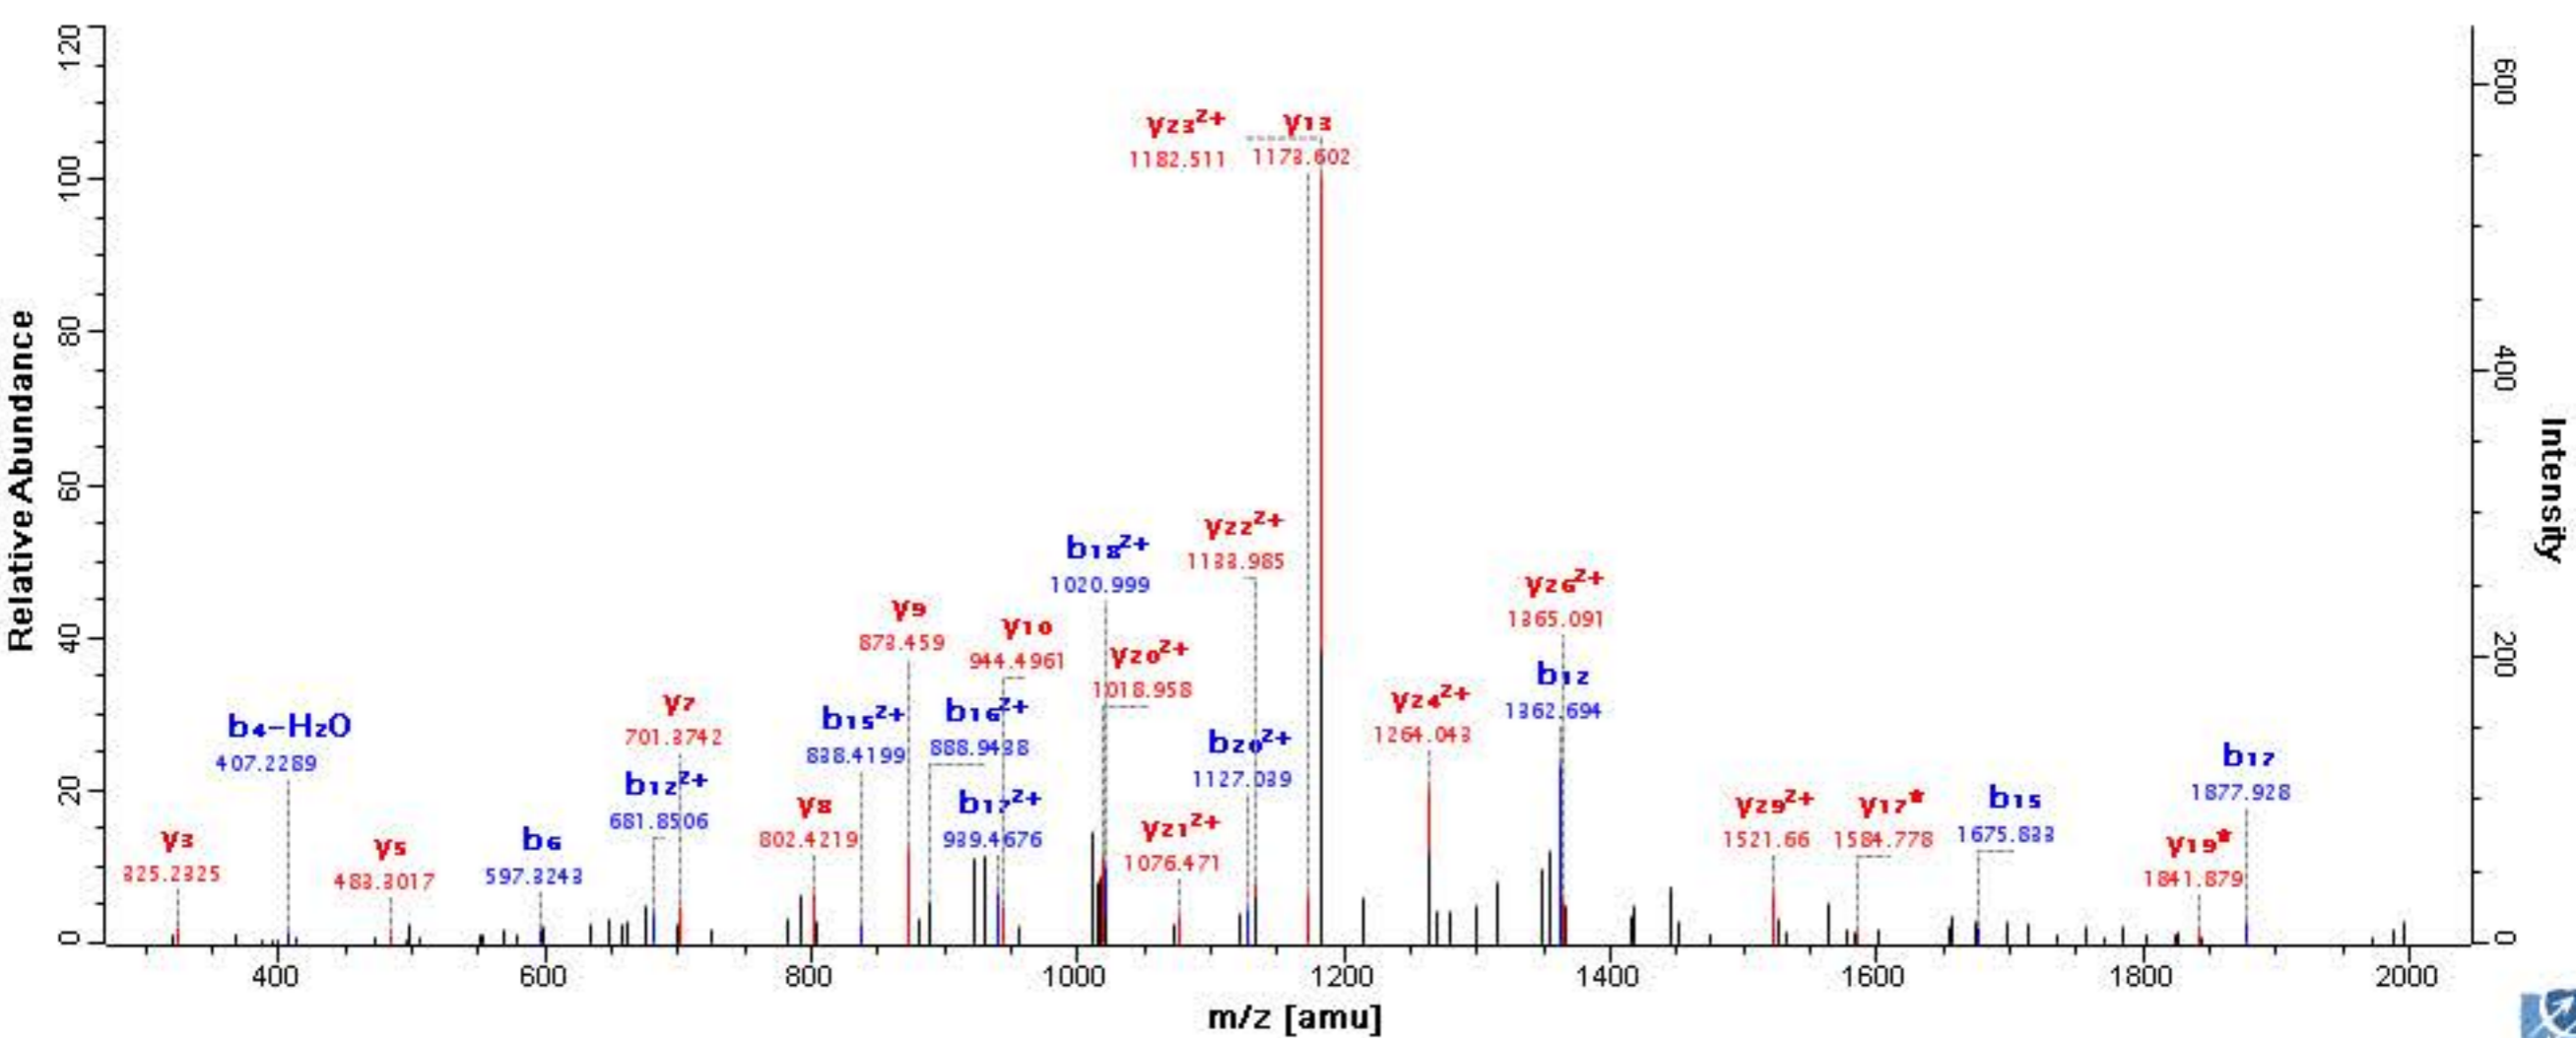

precursor information

|                   |                     |
|-------------------|---------------------|
| Mass:             | 4402.99109          |
| m/z:              | System.Collections. |
| Charge:           | System.Collections. |
| Retentiontime:    | System.Collections. |
| Score:            | 45.02093            |
| Mass Error [ppm]: | -0.2008             |
| PEP:              | 5.0551E-05          |
| Precursor Type:   | ISO                 |

| b <sup>2+</sup> ion |          | b ion     |          | seq |   |    | γ ion    |           | γ <sup>2+</sup> ion |           |
|---------------------|----------|-----------|----------|-----|---|----|----------|-----------|---------------------|-----------|
| Δ dalton            | mass     | Δ dalton  | mass     |     |   |    | Δ dalton | mass      | Δ dalton            | mass      |
|                     | 100.0757 |           | 100.0757 | 1   | V | 40 |          |           |                     |           |
|                     | 199.1441 |           | 199.1441 | 2   | V | 39 | 4304.931 |           | 4304.931            |           |
|                     | 328.1867 |           | 328.1867 | 3   | E | 38 | 4205.862 |           | 4205.862            |           |
|                     | 425.2395 |           | 425.2395 | 4   | P | 37 | 4076.82  |           | 4076.82             |           |
|                     | 526.2871 |           | 526.2871 | 5   | T | 36 | 3979.767 |           | 3979.767            |           |
|                     | 597.3243 | -0.100865 | 597.3243 | 6   | A | 35 | 3878.719 |           | 3878.719            |           |
|                     | 744.3927 |           | 744.3927 | 7   | F | 34 | 3807.682 |           | 3807.682            |           |
|                     | 859.4196 |           | 859.4196 | 8   | D | 33 | 3660.614 |           | 3660.614            |           |
|                     | 987.4782 |           | 987.4782 | 9   | Q | 32 | 3545.587 |           | 3545.587            |           |
|                     | 1150.542 |           | 1150.542 | 10  | Y | 31 | 3417.528 |           | 3417.528            |           |
|                     | 1263.626 |           | 1263.626 | 11  | I | 30 | 3254.465 |           | 3254.465            |           |
| +0.242504           | 681.8506 | -0.002344 | 1362.694 | 12  | V | 29 | 3141.381 |           | 3141.381            |           |
|                     | 1419.715 |           | 1419.715 | 13  | G | 28 | 3042.313 |           | 1521.66             | +0.189706 |
|                     | 1547.774 |           | 1547.774 | 14  | Q | 27 | 2985.291 |           | 2985.291            |           |
| -0.083641           | 838.4199 | +0.057768 | 1675.833 | 15  | Q | 26 | 2857.232 |           | 2857.232            |           |
| -0.110776           | 888.9438 |           | 1776.88  | 16  | T | 25 | 2729.174 |           | 1365.091            | -0.176043 |
| +0.121244           | 939.4676 | -0.20983  | 1877.928 | 17  | T | 24 | 2628.126 |           | 2628.126            |           |
| +0.152202           | 1020.999 |           | 2040.991 | 18  | Y | 23 | 2527.079 |           | 1264.043            | -0.195137 |
|                     | 2138.044 |           | 2138.044 | 19  | P | 22 | 2364.015 |           | 1182.511            | -0.253439 |
| -0.279375           | 1127.039 |           | 2253.071 | 20  | D | 21 | 2266.962 |           | 1133.985            | -0.463141 |
|                     | 2368.098 |           | 2368.098 | 21  | D | 20 | 2151.936 |           | 1076.471            | -0.079918 |
|                     | 2465.151 |           | 2465.151 | 22  | P | 19 | 2036.909 |           | 1018.958            | +0.190389 |
|                     | 2594.193 |           | 2594.193 | 23  | E | 18 | 1939.856 |           | 1939.856            |           |
|                     | 2722.252 |           | 2722.252 | 24  | Q | 17 | 1810.813 |           | 1810.813            |           |
|                     | 2836.295 |           | 2836.295 | 25  | N | 16 | 1682.755 |           | 1682.755            |           |
|                     | 2935.363 |           | 2935.363 | 26  | V | 15 | 1568.712 |           | 1568.712            |           |
|                     | 3116.377 |           | 3116.377 | 27  | T | 14 | 1469.643 |           | 1469.643            |           |
|                     | 3231.404 |           | 3231.404 | 28  | D | 13 | 1288.629 |           | 1288.629            |           |
|                     | 3318.436 |           | 3318.436 | 29  | S | 12 | 1173.602 | +0.0821   | 1173.602            |           |
|                     | 3389.473 |           | 3389.473 | 30  | A | 11 | 1086.57  |           | 1086.57             |           |
|                     | 3460.51  |           | 3460.51  | 31  | A | 10 | 1015.533 |           | 1015.533            |           |
|                     | 3531.548 |           | 3531.548 | 32  | A | 9  | 944.4961 | -0.088743 | 944.4961            |           |
|                     | 3602.585 |           | 3602.585 | 33  | A | 8  | 873.459  | -0.06994  | 873.459             |           |
|                     | 3703.632 |           | 3703.632 | 34  | T | 7  | 802.4219 | -0.096059 | 802.4219            |           |
|                     | 3774.669 |           | 3774.669 | 35  | A | 6  | 701.3742 | -0.18278  | 701.3742            |           |
|                     | 3921.705 |           | 3921.705 | 36  | M | 5  | 630.3371 |           | 630.3371            |           |
|                     | 4008.737 |           | 4008.737 | 37  | S | 4  | 483.3017 | +0.177484 | 483.3017            |           |
|                     | 4079.774 |           | 4079.774 | 38  | A | 3  | 396.2696 |           | 396.2696            |           |
|                     | 4136.795 |           | 4136.795 | 39  | G | 2  | 325.2325 | -0.222582 | 325.2325            |           |
|                     | 4249.88  |           | 4249.88  | 40  | I | 1  | 268.2111 |           | 268.2111            |           |
|                     |          |           |          | 41  | K | 0  | 155.127  |           | 155.127             |           |

general information

|                       |            |
|-----------------------|------------|
| Annotation:           | 23 of 41   |
| AminoAcids Coverage:  | 56 %       |
| Intensity Coverage:   | 46 %       |
| Protein Localisation: | 73 ... 113 |

Source: 20130212\_VR\_Bsu\_TripleSILAC\_pWTPPrkCPrpCReplicate3\_F23  
 Scannumber: 12599  
 Protein: BSU13590; mtnW; ykrW  
 Peptide Score: 118.48  
 Method: ITMS; CID; 3

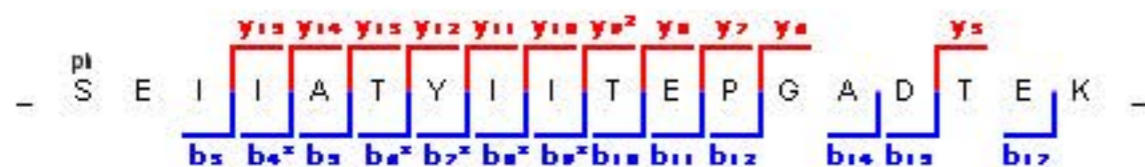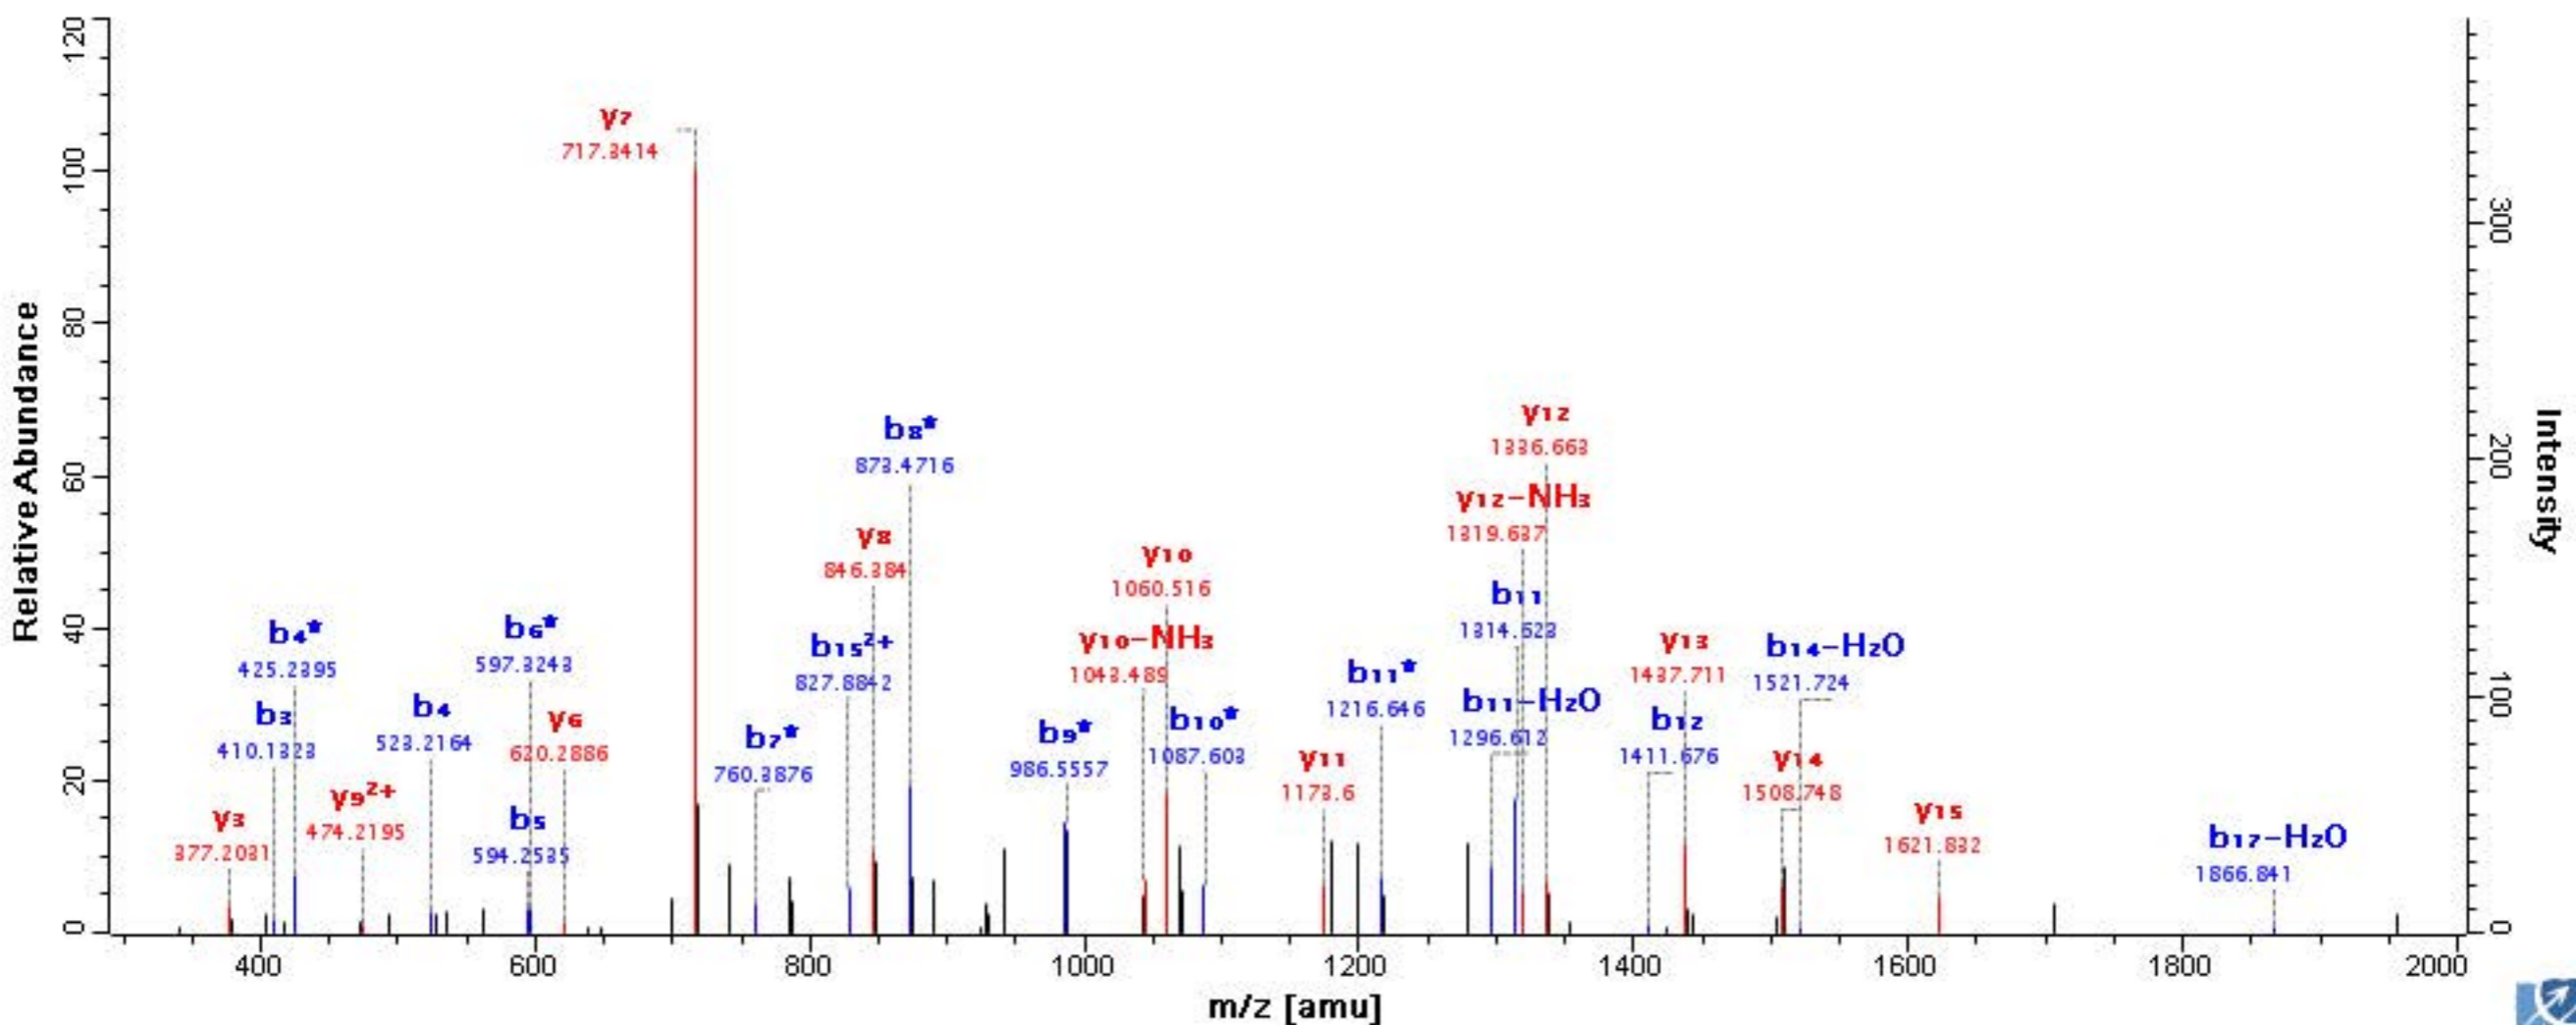

#### precursor information

|                   |                     |
|-------------------|---------------------|
| Mass:             | 2029.94961          |
| m/z:              | System.Collections. |
| Charge:           | System.Collections. |
| Retentiontime:    | System.Collections. |
| Score:            | 118.4799            |
| Mass Error [ppm]: | -0.034226           |
| PEP:              | 1.5772E-14          |
| Precursor Type:   | MULTI               |

#### general information

|                       |          |
|-----------------------|----------|
| Annotation:           | 15 of 18 |
| AminoAcids Coverage:  | 83 %     |
| Intensity Coverage:   | 57 %     |
| Protein Localisation: | 2 ... 19 |

| b <sup>2+</sup> ion |          | b ion     |          | seq |   |    | y ion    |           | y <sup>2+</sup> ion |           |
|---------------------|----------|-----------|----------|-----|---|----|----------|-----------|---------------------|-----------|
| Δ dalton            | mass     | Δ dalton  | mass     |     |   |    | Δ dalton | mass      | Δ dalton            | mass      |
|                     | 168.0056 |           | 168.0056 | 1   | S | 17 |          |           |                     |           |
|                     | 297.0482 |           | 297.0482 | 2   | E | 16 | 1863.959 |           | 1863.959            |           |
|                     | 410.1323 | -0.007445 | 410.1323 | 3   | I | 15 | 1734.916 |           | 1734.916            |           |
|                     | 523.2164 | +0.033094 | 523.2164 | 4   | I | 14 | 1621.832 | -0.203404 | 1621.832            |           |
|                     | 594.2535 | +0.278085 | 594.2535 | 5   | A | 13 | 1508.748 | -0.248979 | 1508.748            |           |
|                     | 695.3011 |           | 695.3011 | 6   | T | 12 | 1437.711 | -0.058301 | 1437.711            |           |
|                     | 858.3645 |           | 858.3645 | 7   | Y | 11 | 1336.663 | -0.13782  | 1336.663            |           |
|                     | 971.4485 |           | 971.4485 | 8   | I | 10 | 1173.6   | -0.13455  | 1173.6              |           |
|                     | 1084.533 |           | 1084.533 | 9   | I | 9  | 1060.516 | -0.240671 | 1060.516            |           |
|                     | 1185.58  |           | 1185.58  | 10  | T | 8  | 947.4316 |           | 474.2195            | -0.055605 |
|                     | 1314.623 | -0.202711 | 1314.623 | 11  | E | 7  | 846.384  | +0.002155 | 846.384             |           |
|                     | 1411.676 | -0.004376 | 1411.676 | 12  | P | 6  | 717.3414 | -0.040457 | 717.3414            |           |
|                     | 1468.697 |           | 1468.697 | 13  | G | 5  | 620.2886 | +0.036782 | 620.2886            |           |
|                     | 1539.734 |           | 1539.734 | 14  | A | 4  | 563.2671 |           | 563.2671            |           |
| +0.369321           | 827.8842 |           | 1654.761 | 15  | D | 3  | 492.23   |           | 492.23              |           |
|                     | 1755.809 |           | 1755.809 | 16  | T | 2  | 377.2031 | +0.035541 | 377.2031            |           |
|                     | 1884.851 |           | 1884.851 | 17  | E | 1  | 276.1554 |           | 276.1554            |           |
|                     |          |           |          | 18  | K | 0  | 147.1128 |           | 147.1128            |           |

Source: 20130212\_VR\_Bsu\_TripleSILAC\_pWTPPrkCPrpCReplicate3\_F23  
 Scannumber: 2845  
 Protein: accD; BSU29210; yttI  
 Peptide Score: 87.3  
 Method: ITMS; CID; 3

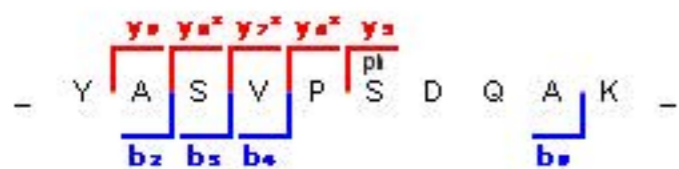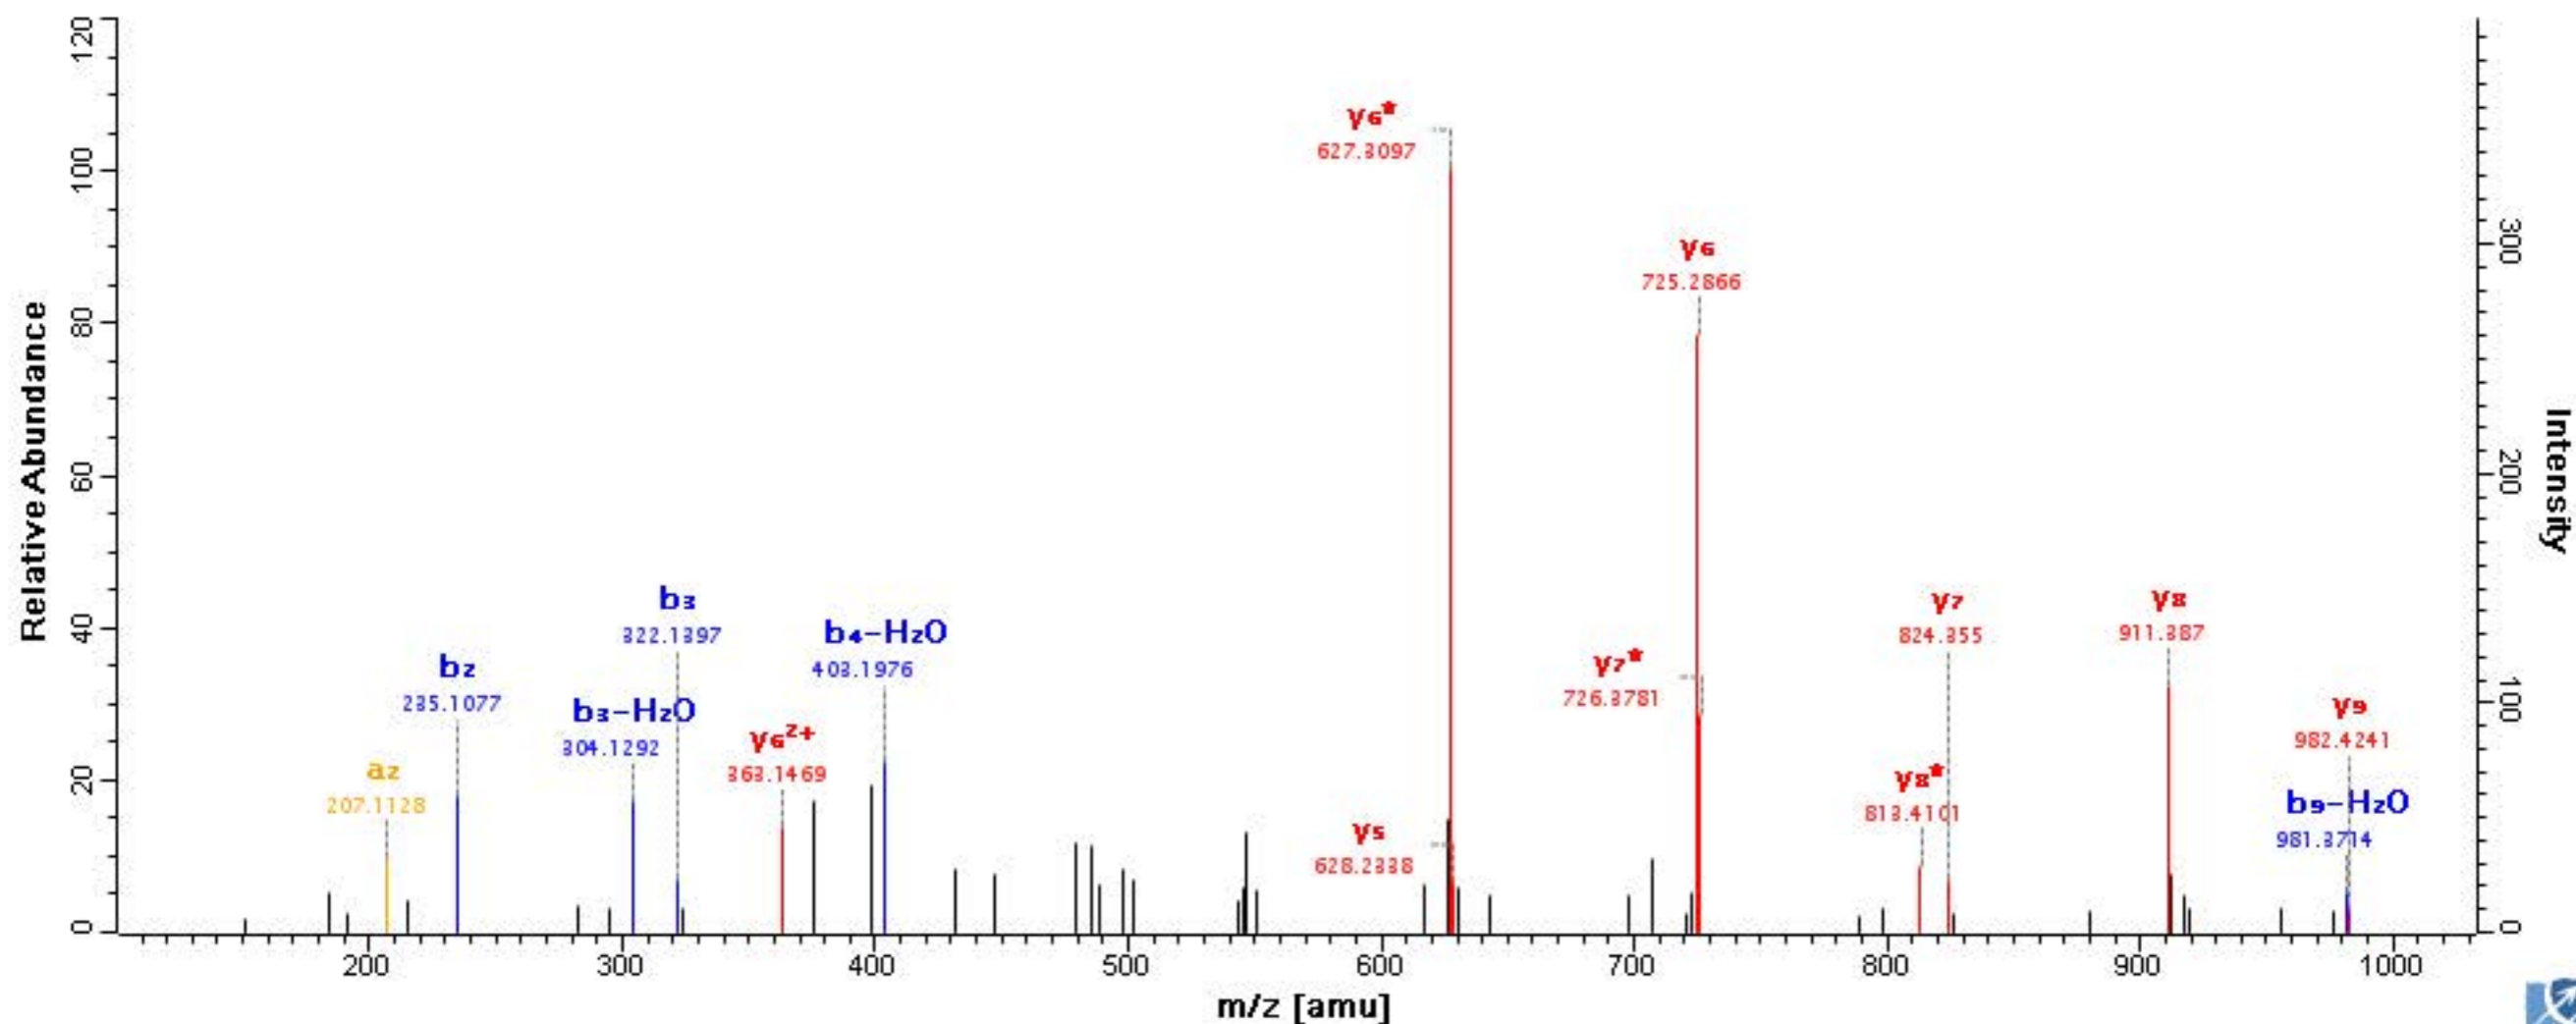

### precursor information

|                   |                     |
|-------------------|---------------------|
| Mass:             | 1144.48058          |
| m/z:              | System.Collections. |
| Charge:           | System.Collections. |
| Retentiontime:    | System.Collections. |
| Score:            | 87.29805            |
| Mass Error [ppm]: | 0.36304             |
| PEP:              | 0.0076599           |
| Precursor Type:   | MULTI               |

### general information

|                       |           |
|-----------------------|-----------|
| Annotation:           | 7 of 10   |
| AminoAcids Coverage:  | 70 %      |
| Intensity Coverage:   | 60 %      |
| Protein Localisation: | 12 ... 21 |

| a ion     |          | b ion     |          |    |     |   | y ion    |           | y <sup>2+</sup> ion |           |
|-----------|----------|-----------|----------|----|-----|---|----------|-----------|---------------------|-----------|
| Δ dalton  | mass     | Δ dalton  | mass     |    | seq |   | Δ dalton | mass      | Δ dalton            | mass      |
|           | 136.0757 |           | 164.0706 | 1  | Y   | 9 |          |           |                     |           |
| +0.102665 | 207.1128 | -0.006172 | 235.1077 | 2  | A   | 8 | 982.4241 | -0.03691  | 982.4241            |           |
|           | 294.1448 | +0.161644 | 322.1397 | 3  | S   | 7 | 911.387  | -0.113383 | 911.387             |           |
|           | 393.2132 |           | 421.2082 | 4  | V   | 6 | 824.355  | -0.17779  | 824.355             |           |
|           | 490.266  |           | 518.2609 | 5  | P   | 5 | 725.2866 | -0.0542   | 363.1469            | +0.091912 |
|           | 657.2644 |           | 685.2593 | 6  | S   | 4 | 628.2338 | +0.209501 | 628.2338            |           |
|           | 772.2913 |           | 800.2862 | 7  | D   | 3 | 461.2354 |           | 461.2354            |           |
|           | 900.3499 |           | 928.3448 | 8  | Q   | 2 | 346.2085 |           | 346.2085            |           |
|           | 971.387  |           | 999.3819 | 9  | A   | 1 | 218.1499 |           | 218.1499            |           |
|           |          |           |          | 10 | K   | 0 | 147.1128 |           | 147.1128            |           |

Source: 20130212\_VR\_Bsu\_TripleSILAC\_pWTPPrkCPrpCReplicate3\_F23  
 Scannumber: 3391  
 Protein: BSU02620; phoD; ycb5  
 Peptide Score: 83.31  
 Method: ITMS; CID; 3

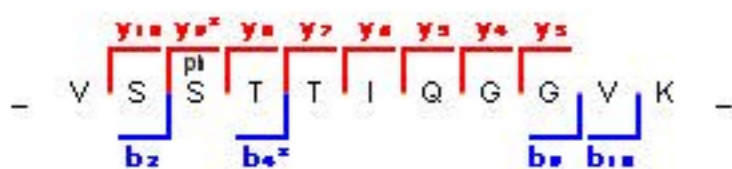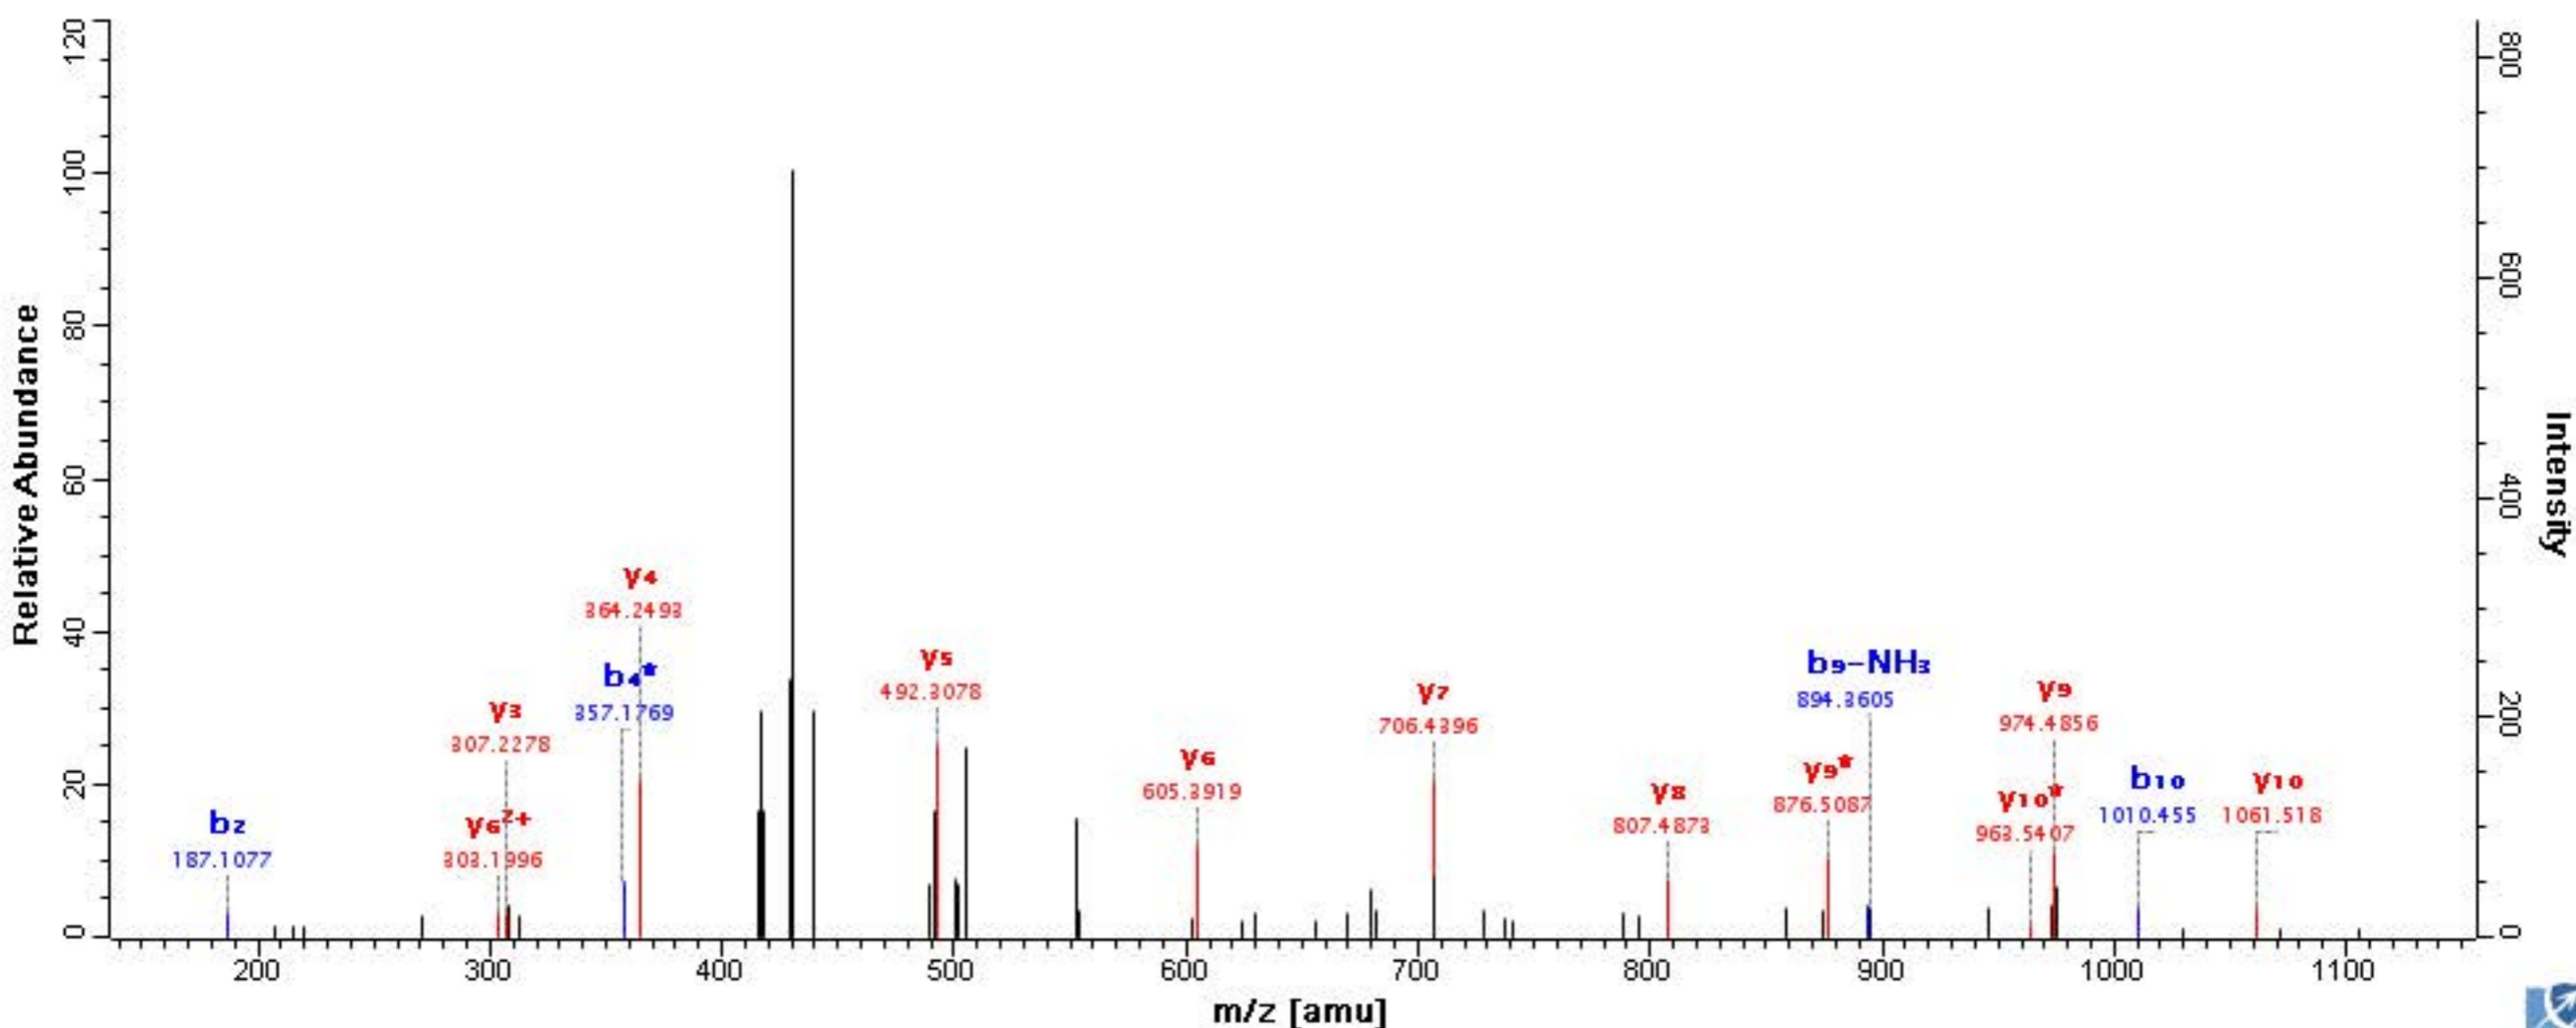

#### precursor information

|                   |                     |
|-------------------|---------------------|
| Mass:             | 1155.55385          |
| m/z:              | System.Collections. |
| Charge:           | System.Collections. |
| Retentiontime:    | System.Collections. |
| Score:            | 83.31412            |
| Mass Error [ppm]: | 0.15272             |
| PEP:              | 0.0019391           |
| Precursor Type:   | MULTI               |

#### general information

|                       |             |
|-----------------------|-------------|
| Annotation:           | 9 of 11     |
| AminoAcids Coverage:  | 82 %        |
| Intensity Coverage:   | 26 %        |
| Protein Localisation: | 543 ... 553 |

| b ion      |              |    |     |    | y ion        |            | y <sup>2+</sup> ion |            |
|------------|--------------|----|-----|----|--------------|------------|---------------------|------------|
| Δ dalton   | mass         |    | seq |    | Δ dalton     | mass       | Δ dalton            | mass       |
|            | 100.07569038 | 1  | V   | 10 |              |            |                     |            |
| -0.0773843 | 187.10771879 | 2  | S   | 9  | 1061.5176382 | -0.0264272 | 1061.5176382        |            |
|            | 354.10607761 | 3  | S   | 8  | 974.48560978 | -0.1833637 | 974.48560978        |            |
|            | 455.15375609 | 4  | T   | 7  | 807.48725096 | +0.06469   | 807.48725096        |            |
|            | 556.20143456 | 5  | T   | 6  | 706.43957248 | -0.1428806 | 706.43957248        |            |
|            | 669.28549854 | 6  | I   | 5  | 605.39189401 | -0.0096919 | 303.19958524        | -0.1599124 |
|            | 797.34407605 | 7  | Q   | 4  | 492.30783003 | -0.05606   | 492.30783003        |            |
|            | 854.36553977 | 8  | G   | 3  | 364.24925252 | +0.0716093 | 364.24925252        |            |
|            | 911.3870035  | 9  | G   | 2  | 307.22778879 | +0.0587102 | 307.22778879        |            |
| +0.1762354 | 1010.4554174 | 10 | V   | 1  | 250.20632507 |            | 250.20632507        |            |
|            |              | 11 | K   | 0  | 151.13791115 |            | 151.13791115        |            |

Source: 20130212\_VR\_Bsu\_TripleSILAC\_pWTPPrkCPrpCReplicate3\_F23  
 Scannumber: 4066  
 Protein: BSU28290; ilvC  
 Peptide Score: 135.43  
 Method: ITMS; CID; 3

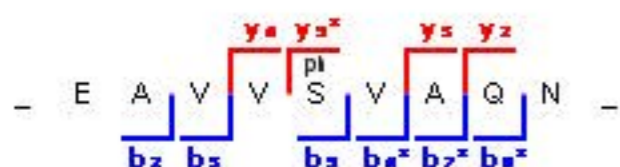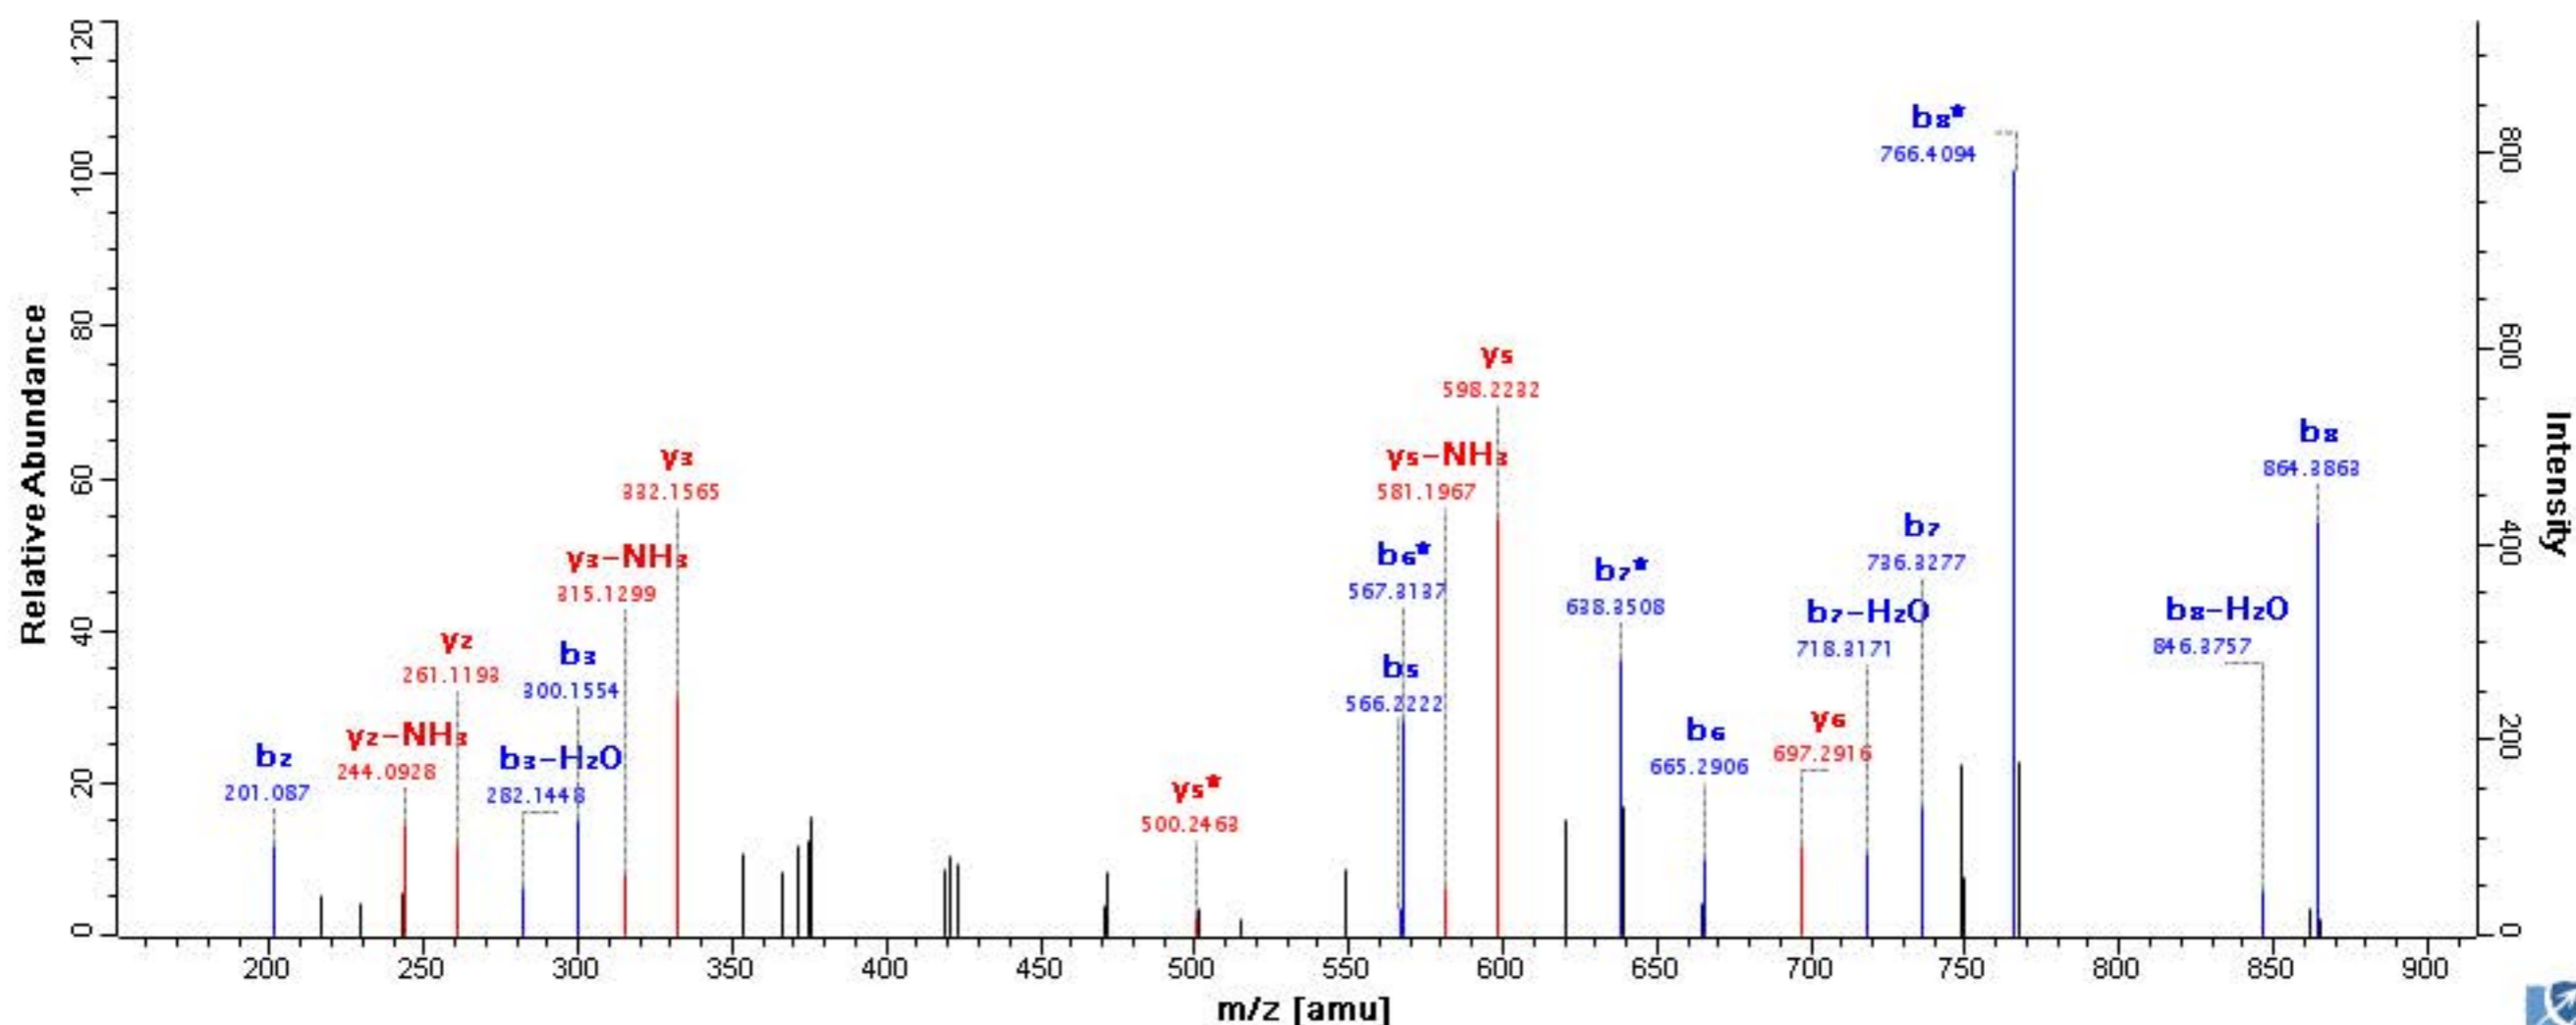

#### precursor information

|                       |                     |
|-----------------------|---------------------|
| Mass:                 | 995.43243           |
| m/z:                  | System.Collections. |
| Charge:               | System.Collections. |
| Retentiontime:        | System.Collections. |
| Score:                | 135.4286            |
| Mass Error [ppm]:     | -0.059392           |
| PEP:                  | 0.03817             |
| g Precursor Type:     | ISO                 |
| Annotation:           | 7 of 9              |
| AminoAcids Coverag    | 78 %                |
| Intensity Coverage:   | 66 %                |
| Protein Localisation: | 334 ... 342         |

| b ion      |               |     |   | y ion    |               |            |
|------------|---------------|-----|---|----------|---------------|------------|
| Δ dalton   | mass          | seq |   | Δ dalton | mass          |            |
|            | 130.049869563 | 1   | E | 8        |               |            |
| +0.060386  | 201.086983351 | 2   | A | 7        | 867.397174254 |            |
| -0.0966814 | 300.155397267 | 3   | V | 6        | 796.360060466 |            |
|            | 399.223811183 | 4   | V | 5        | 697.29164655  | -0.0591636 |
| +0.2094096 | 566.222170001 | 5   | S | 4        | 598.223232634 | -0.0813869 |
| -0.007808  | 665.290583918 | 6   | V | 3        | 431.224873815 |            |
| -0.2945556 | 736.327697705 | 7   | A | 2        | 332.156459899 | -0.1411706 |
| -0.0756673 | 864.386275217 | 8   | Q | 1        | 261.119346111 | +0.0248189 |
|            |               | 9   | N | 0        | 133.0607686   |            |

Source: 20130212\_VR\_Bsu\_TripleSILAC\_pWTPPrkCPrpCReplicate3\_F23  
 Scannumber: 4116  
 Protein: BSU30570; ytmB  
 Peptide Score: 89.7  
 Method: ITMS; CID; 3

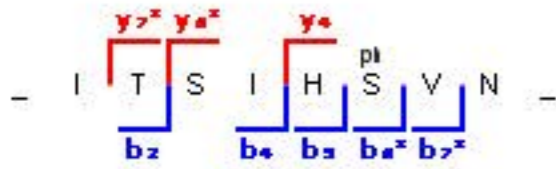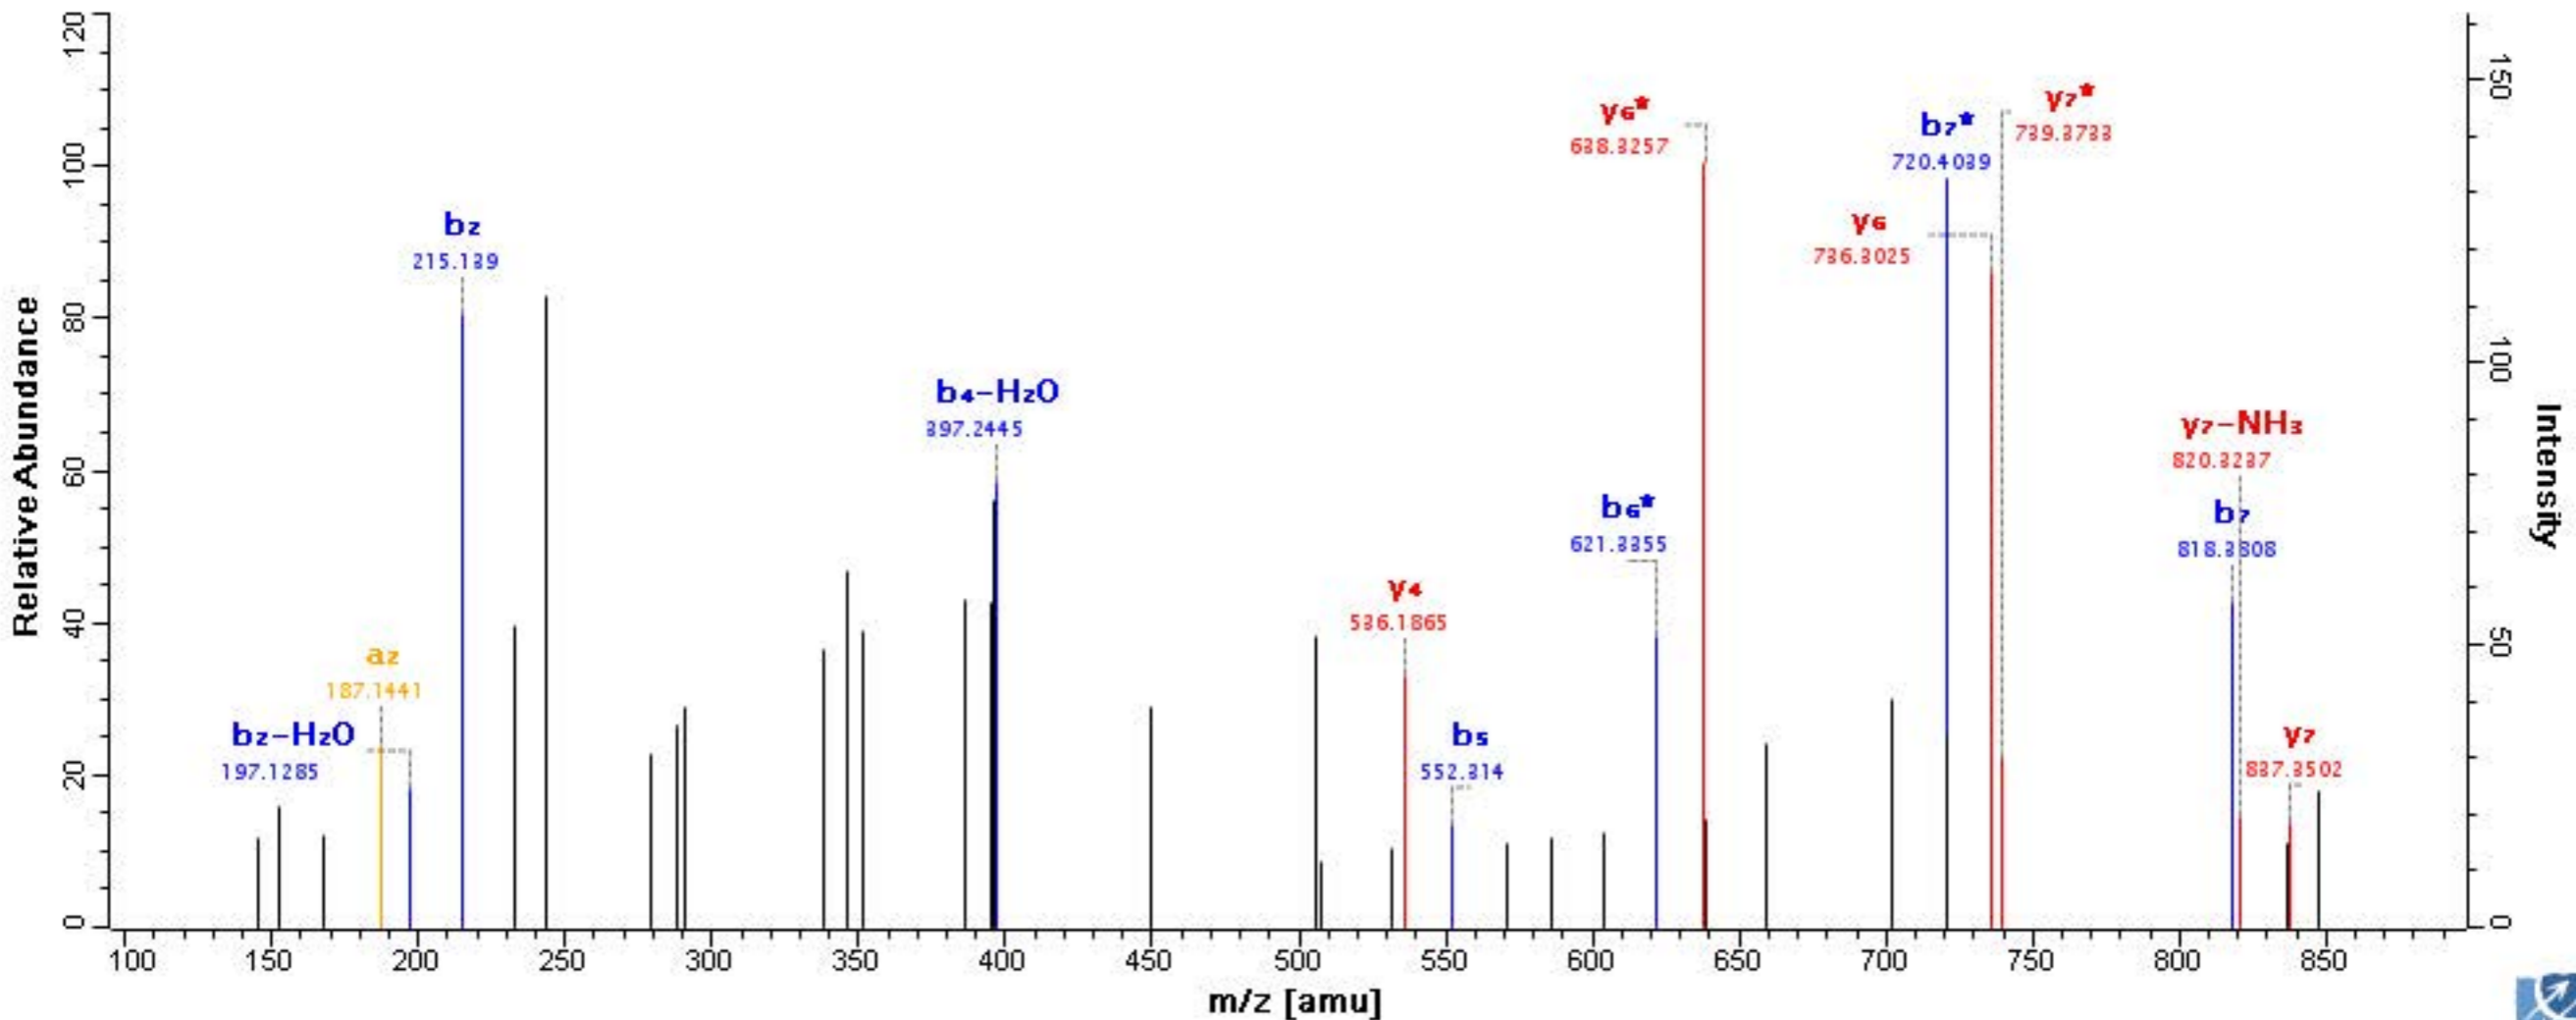

**precursor information**

|                       |                     |
|-----------------------|---------------------|
| Mass:                 | 949.42724           |
| m/z:                  | System.Collections. |
| Charge:               | System.Collections. |
| Retentiontime:        | System.Collections. |
| Score:                | 89.69799            |
| Mass Error [ppm]:     | 0.24321             |
| g PEP:                | 0.0452              |
| Annotation:           | 6 of 8              |
| AminoAcids Coverage:  | 75 %                |
| Intensity Coverage:   | 46 %                |
| Protein Localisation: | 73 ... 80           |

| a ion      |              | b ion      |              |     | y ion |          |                         |
|------------|--------------|------------|--------------|-----|-------|----------|-------------------------|
| Δ dalton   | mass         | Δ dalton   | mass         | seq |       | Δ dalton | mass                    |
|            | 86.096425825 |            | 114.09134045 | 1   | I     | 7        |                         |
| +0.1284177 | 187.1441043  | -0.0014762 | 215.13901892 | 2   | T     | 6        | 837.35022406 +0.1701006 |
|            | 274.17613271 |            | 302.17104733 | 3   | S     | 5        | 736.30254559 -0.1185856 |
|            | 387.26019669 |            | 415.25511131 | 4   | I     | 4        | 649.27051718            |
|            | 524.31910855 | -0.2091037 | 552.31402317 | 5   | H     | 3        | 536.1864532 -0.2978424  |
|            | 691.31746737 |            | 719.31238199 | 6   | S     | 2        | 399.12754133            |
|            | 790.38588129 | -0.094419  | 818.38079591 | 7   | V     | 1        | 232.12918252            |
|            |              |            |              | 8   | N     | 0        | 133.0607686             |



Source: 20130212\_VR\_Bsu\_TripleSILAC\_pWTPPrkCPrpCReplicate3\_F23  
 Scannumber: 4213  
 Protein: BSU36050; cotB  
 Peptide Score: 128.03  
 Method: ITMS; CID; 3

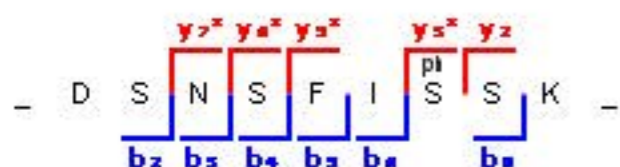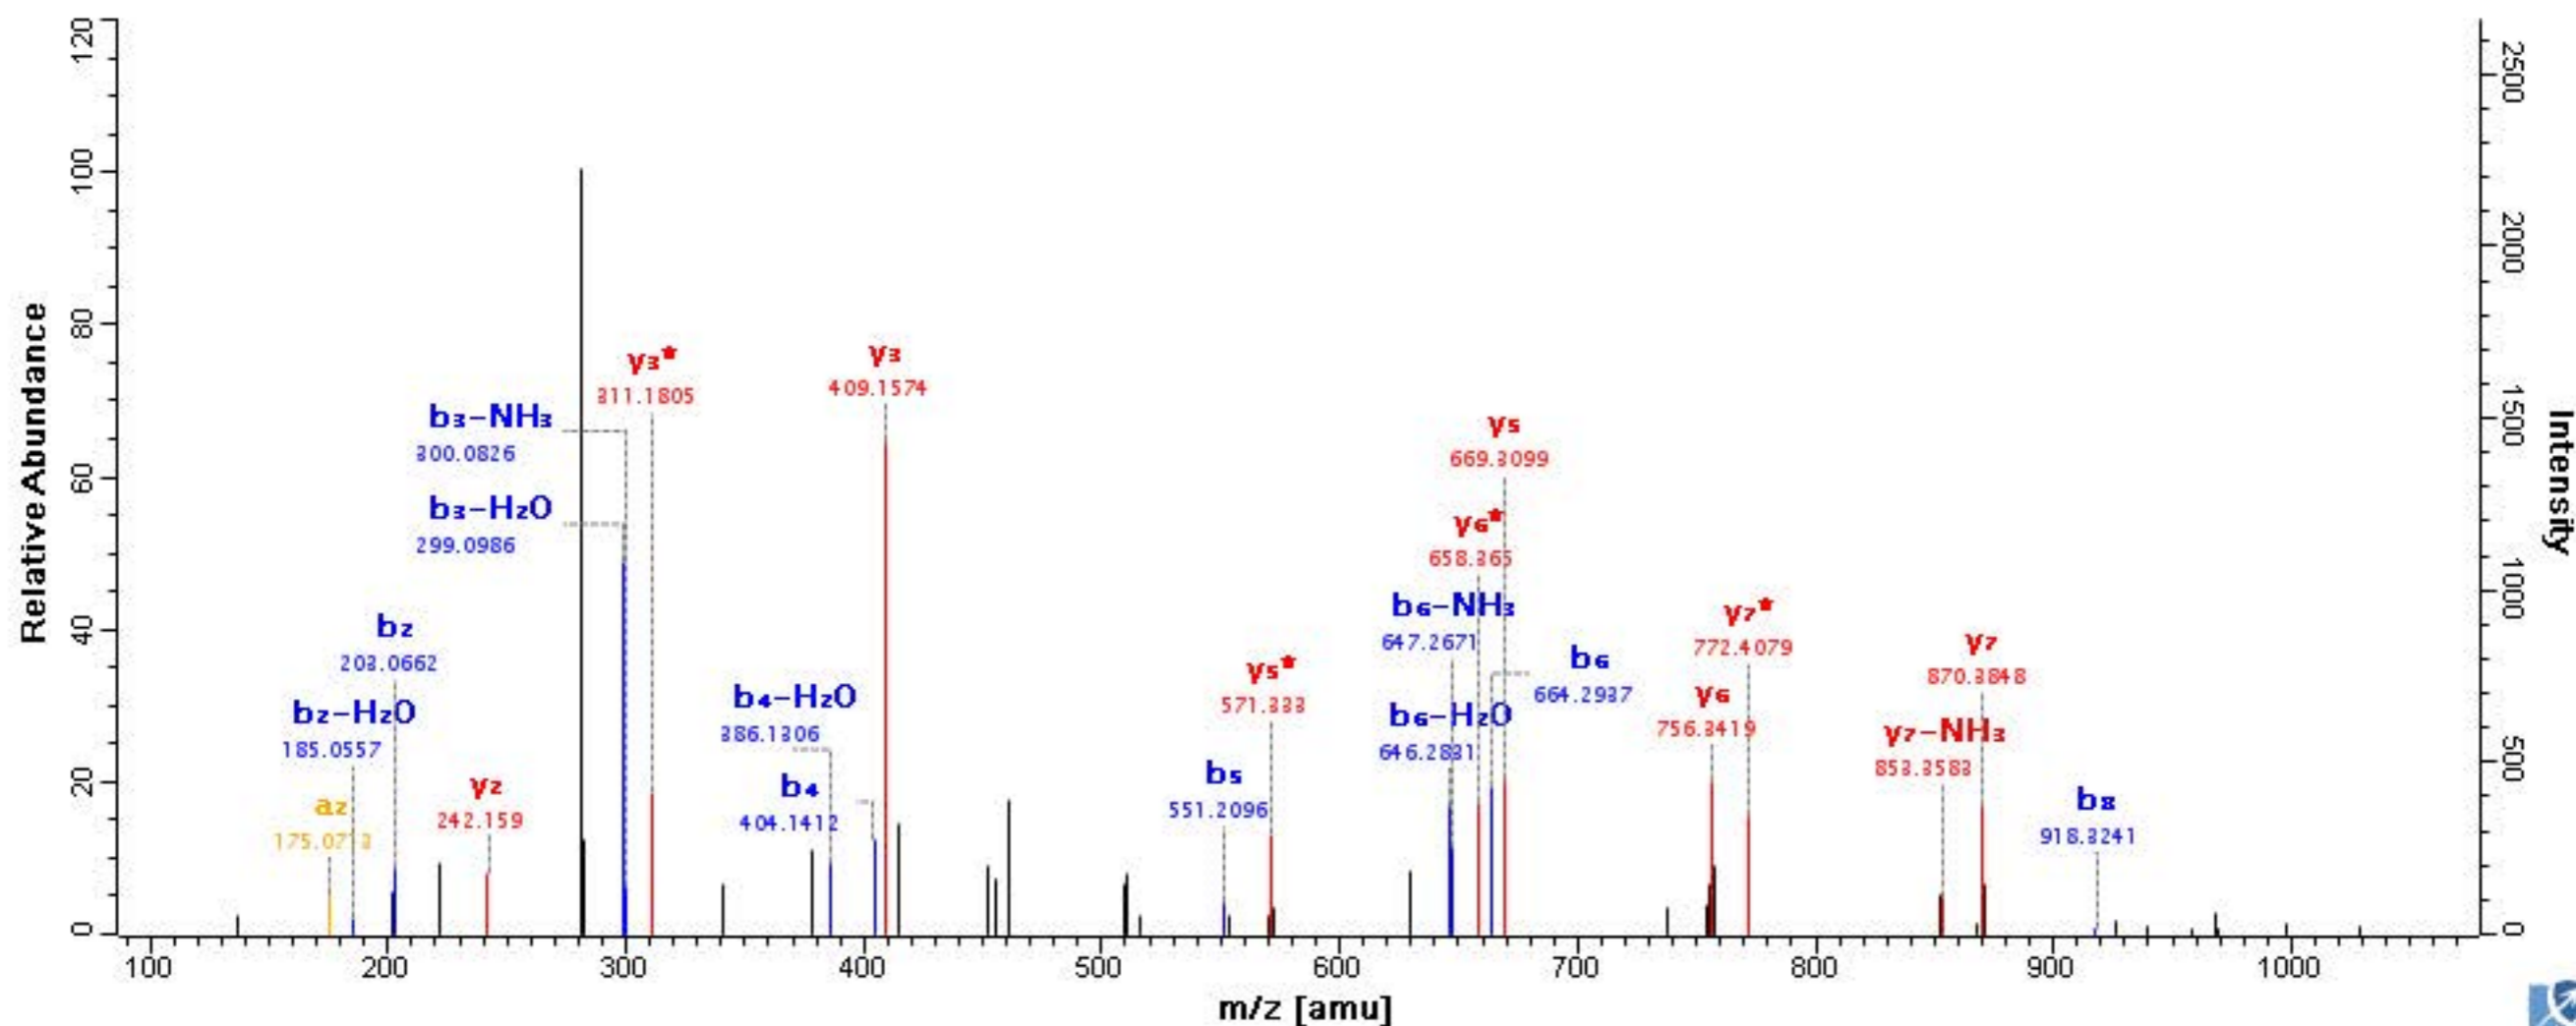

#### precursor information

|                       |                     |
|-----------------------|---------------------|
| Mass:                 | 1063.42208          |
| m/z:                  | System.Collections. |
| Charge:               | System.Collections. |
| Retentiontime:        | System.Collections. |
| Score:                | 128.0347            |
| Mass Error [ppm]:     | -0.22308            |
| PEP:                  | 8.6535E-07          |
| g Precursor Type:     | MULTI               |
| Annotation:           | 7 of 9              |
| AminoAcids Coverag    | 78 %                |
| Intensity Coverage:   | 54 %                |
| Protein Localisation: | 247 ... 255         |

| a ion      |              | b ion      |              |     | y ion |          |                         |
|------------|--------------|------------|--------------|-----|-------|----------|-------------------------|
| Δ dalton   | mass         | Δ dalton   | mass         | seq |       | Δ dalton | mass                    |
|            | 88.039304876 |            | 116.0342195  | 1   | D     | 8        |                         |
| -0.0342087 | 175.07133329 | +0.0761166 | 203.06624791 | 2   | S     | 7        | 957.41685238            |
|            | 289.11426073 |            | 317.10917536 | 3   | N     | 6        | 870.38482397 -0.0686619 |
|            | 376.14628914 | +0.0185863 | 404.14120377 | 4   | S     | 5        | 756.34189652 -0.0915303 |
|            | 523.21470306 | +0.0485    | 551.20961768 | 5   | F     | 4        | 669.30986811 -0.0823901 |
|            | 636.29876704 | -0.1529346 | 664.29368166 | 6   | I     | 3        | 522.24145419            |
|            | 803.29712586 |            | 831.29204048 | 7   | S     | 2        | 409.15739021 -0.1376148 |
|            | 890.32915427 | -0.4330166 | 918.32406889 | 8   | S     | 1        | 242.15903139 -0.2371564 |
|            |              |            |              | 9   | K     | 0        | 155.12700298            |

Source: 20130212\_VR\_Bsu\_TripleSILAC\_pWTPPrkCPrpCReplicate3\_F23  
 Scannumber: 5205  
 Protein: BSU13180; metC; metE  
 Peptide Score: 120.06  
 Method: ITMS; CID; 3

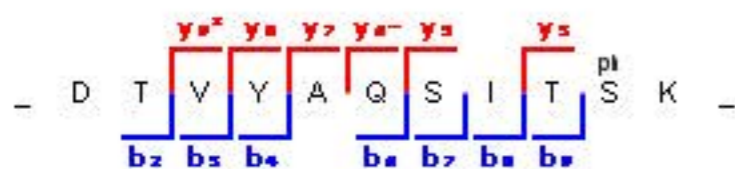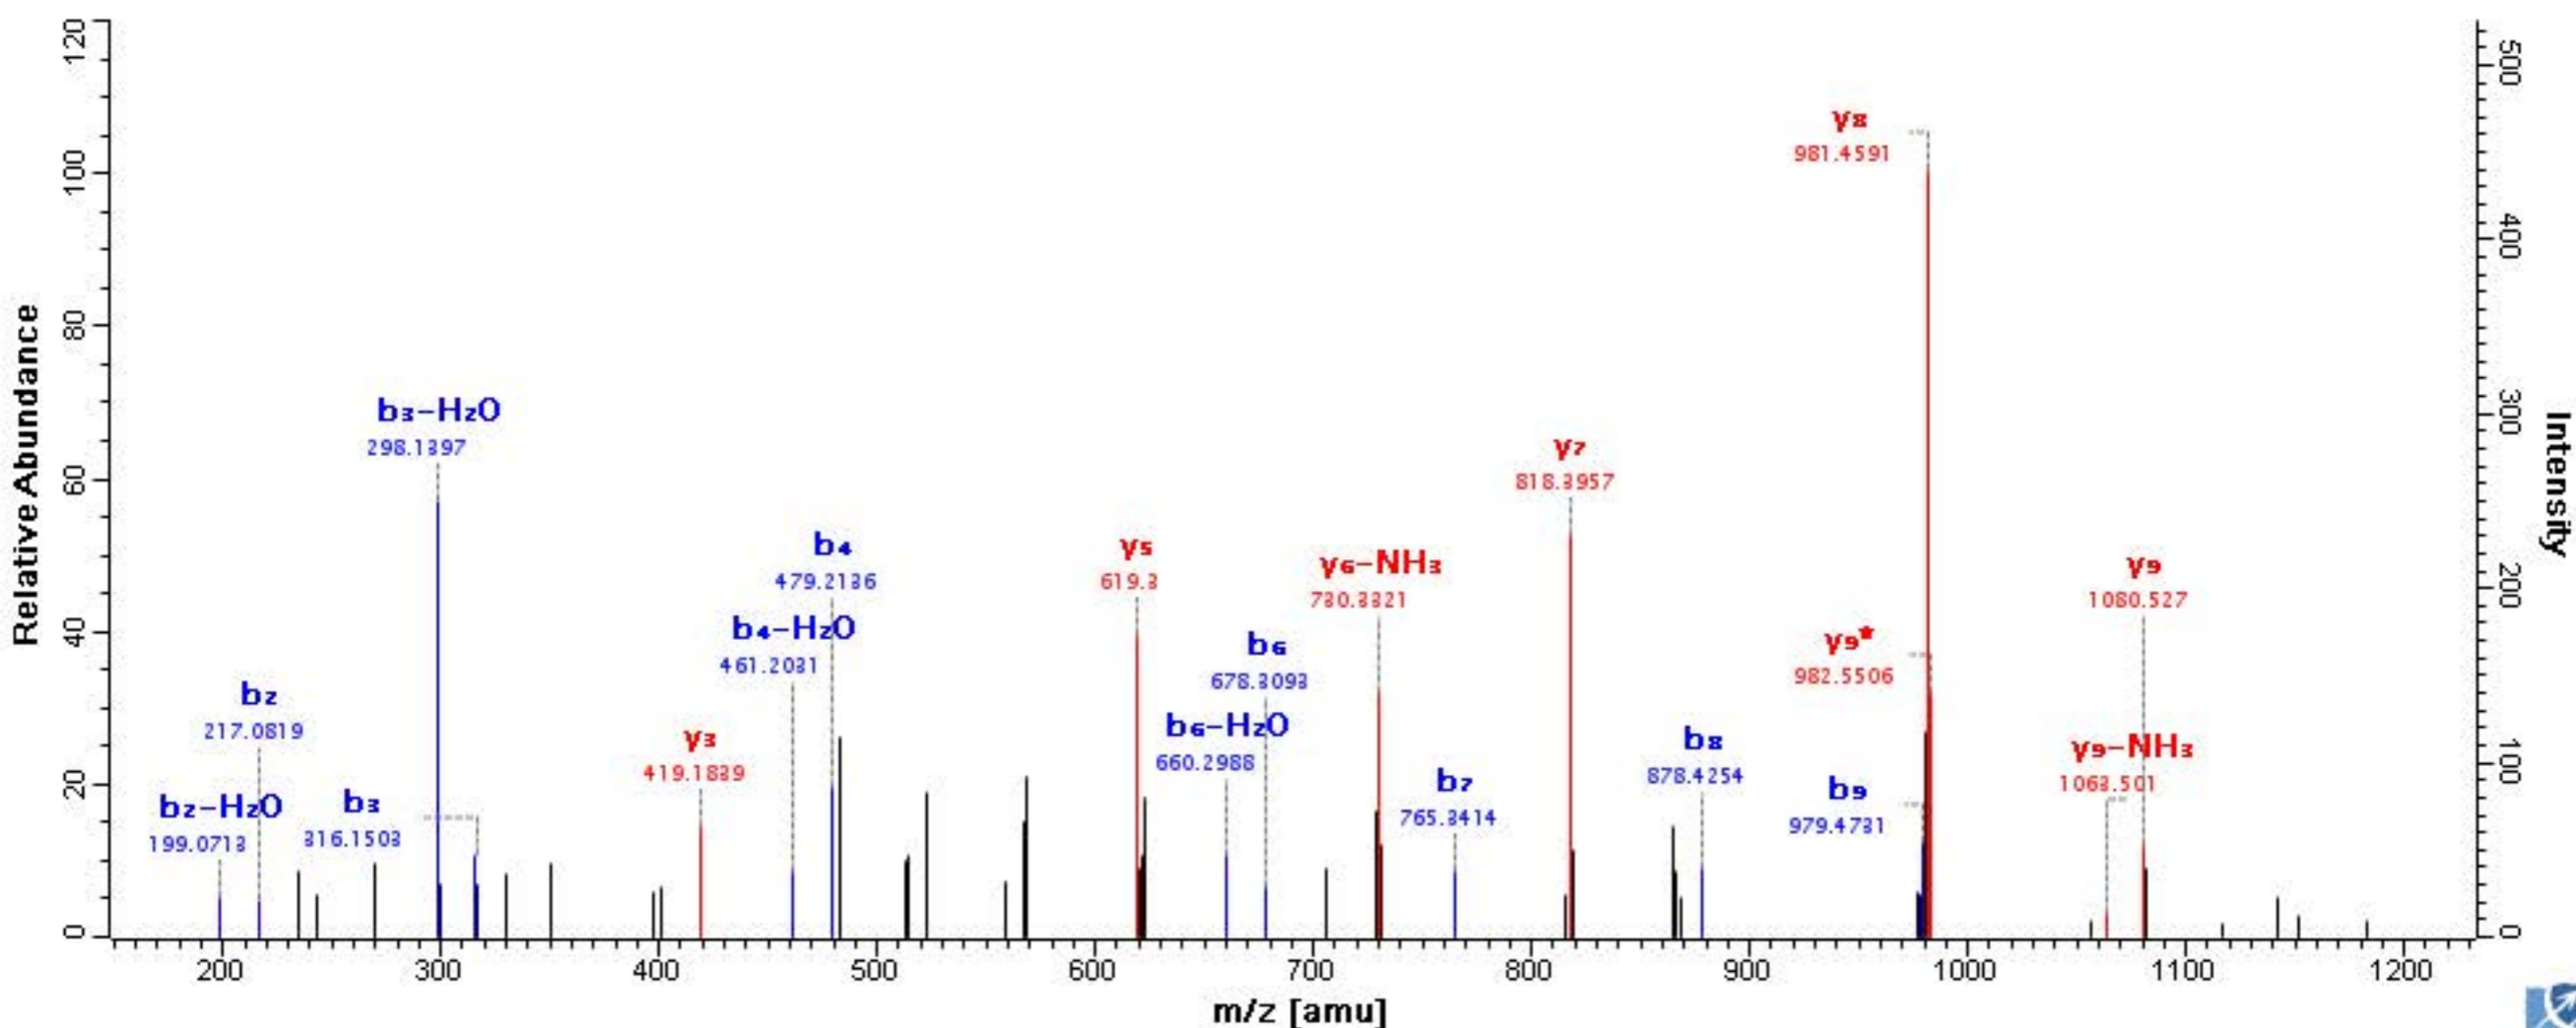

**precursor information**

|                   |                     |
|-------------------|---------------------|
| Mass:             | 1291.56962          |
| m/z:              | System.Collections. |
| Charge:           | System.Collections. |
| Retentiontime:    | System.Collections. |
| Score:            | 120.0616            |
| Mass Error [ppm]: | -0.071657           |
| PEP:              | 9.4626E-07          |
| Precursor Type:   | MULTI               |

**general information**

|                       |             |
|-----------------------|-------------|
| Annotation:           | 8 of 11     |
| AminoAcids Coverage:  | 73 %        |
| Intensity Coverage:   | 54 %        |
| Protein Localisation: | 540 ... 550 |

| b ion      |                |    |     |    |                | y ion      |  |
|------------|----------------|----|-----|----|----------------|------------|--|
| Δ dalton   | mass           |    | seq |    | Δ dalton       | mass       |  |
|            | 116.034219499  | 1  | D   | 10 |                |            |  |
| -0.045109  | 217.081897973  | 2  | T   | 9  | 1181.575153065 |            |  |
| -0.2158636 | 316.150311889  | 3  | V   | 8  | 1080.527474591 | -0.1480801 |  |
| -0.0424978 | 479.213640427  | 4  | Y   | 7  | 981.459060674  | -0.1345978 |  |
|            | 550.250754215  | 5  | A   | 6  | 818.395732136  | -0.051799  |  |
| +0.0420477 | 678.309331726  | 6  | Q   | 5  | 747.358618348  |            |  |
| -0.2581692 | 765.341360136  | 7  | S   | 4  | 619.300040837  | -0.0599896 |  |
| -0.055368  | 878.425424117  | 8  | I   | 3  | 532.268012427  |            |  |
| +0.07304   | 979.473102591  | 9  | T   | 2  | 419.183948447  | -0.0068244 |  |
|            | 1146.471461409 | 10 | S   | 1  | 318.136269973  |            |  |
|            |                | 11 | K   | 0  | 151.137911154  |            |  |

Source: 20130212\_VR\_Bsu\_TripleSILAC\_pWTPPrkCPrpCReplicate3\_F23  
 Scannumber: 6140  
 Protein: BSU22070; xpt  
 Peptide Score: 160.36  
 Method: ITMS; CID; 3

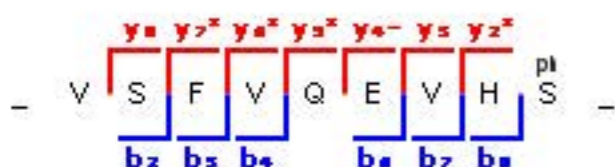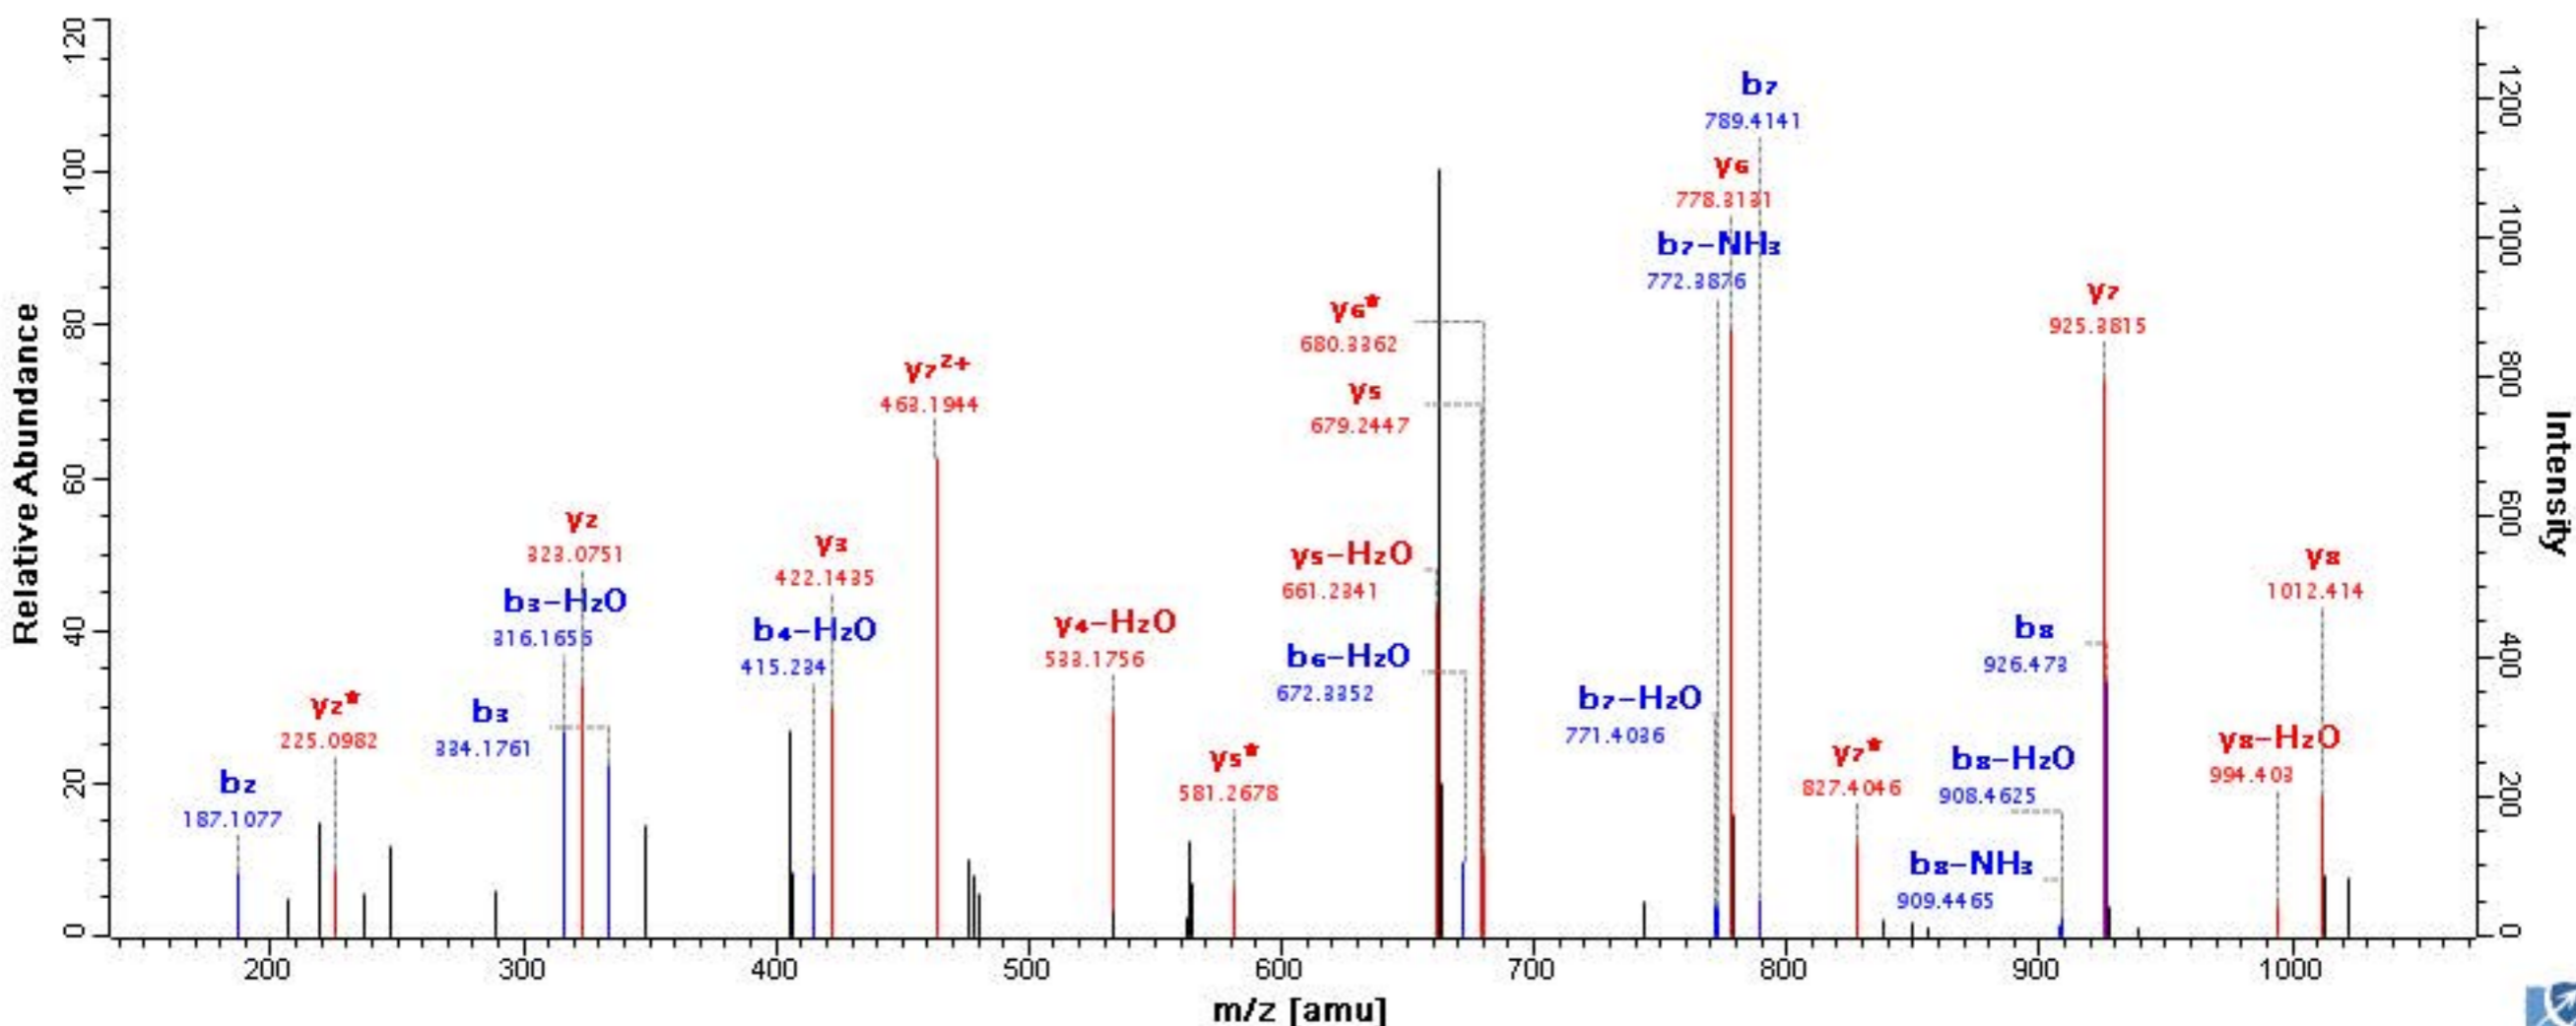

#### precursor information

|                       |                     |
|-----------------------|---------------------|
| Mass:                 | 1110.47471          |
| m/z:                  | System.Collections. |
| Charge:               | System.Collections. |
| Retentiontime:        | System.Collections. |
| Score:                | 160.3616            |
| Mass Error [ppm]:     | 0.021044            |
| PEP:                  | 8.1257E-23          |
| g Precursor Type:     | ISO                 |
| Annotation:           | 7 of 9              |
| AminoAcids Coverag    | 78 %                |
| Intensity Coverage:   | 65 %                |
| Protein Localisation: | 186 ... 194         |

| b ion      |              |   |     |   | γ ion        |            | γ <sup>2+</sup> ion |            |
|------------|--------------|---|-----|---|--------------|------------|---------------------|------------|
| Δ dalton   | mass         |   | seq |   | Δ dalton     | mass       | Δ dalton            | mass       |
|            | 100.07569038 | 1 | V   | 8 |              |            |                     |            |
| +0.007363  | 187.10771879 | 2 | S   | 7 | 1012.4135526 | -0.2012113 | 1012.4135526        |            |
| -0.0922704 | 334.17613271 | 3 | F   | 6 | 925.38152419 | -0.0261165 | 463.19440033        | +0.1560635 |
|            | 433.24454663 | 4 | V   | 5 | 778.31311027 | -0.1014404 | 778.31311027        |            |
|            | 561.30312414 | 5 | Q   | 4 | 679.24469636 | -0.0246646 | 679.24469636        |            |
|            | 690.34571723 | 6 | E   | 3 | 551.18611885 |            | 551.18611885        |            |
| +0.0757981 | 789.41413115 | 7 | V   | 2 | 422.14352575 | -0.0771805 | 422.14352575        |            |
| -0.1103111 | 926.47304301 | 8 | H   | 1 | 323.07511183 | +0.0801006 | 323.07511183        |            |
|            |              | 9 | S   | 0 | 186.01619997 |            | 186.01619997        |            |

Source: 20130212\_VR\_Bsu\_TripleSILAC\_pWTPPrkCPrpCReplicate3\_F23  
 Scannumber: 6326  
 Protein: ath; BSU06500; purM  
 Peptide Score: 210.15  
 Method: ITMS; CID; 3

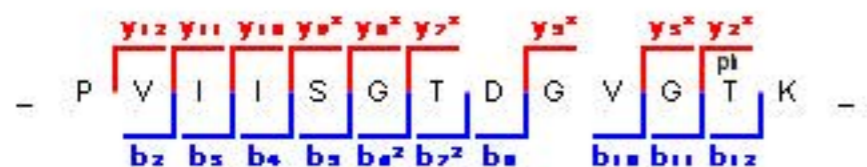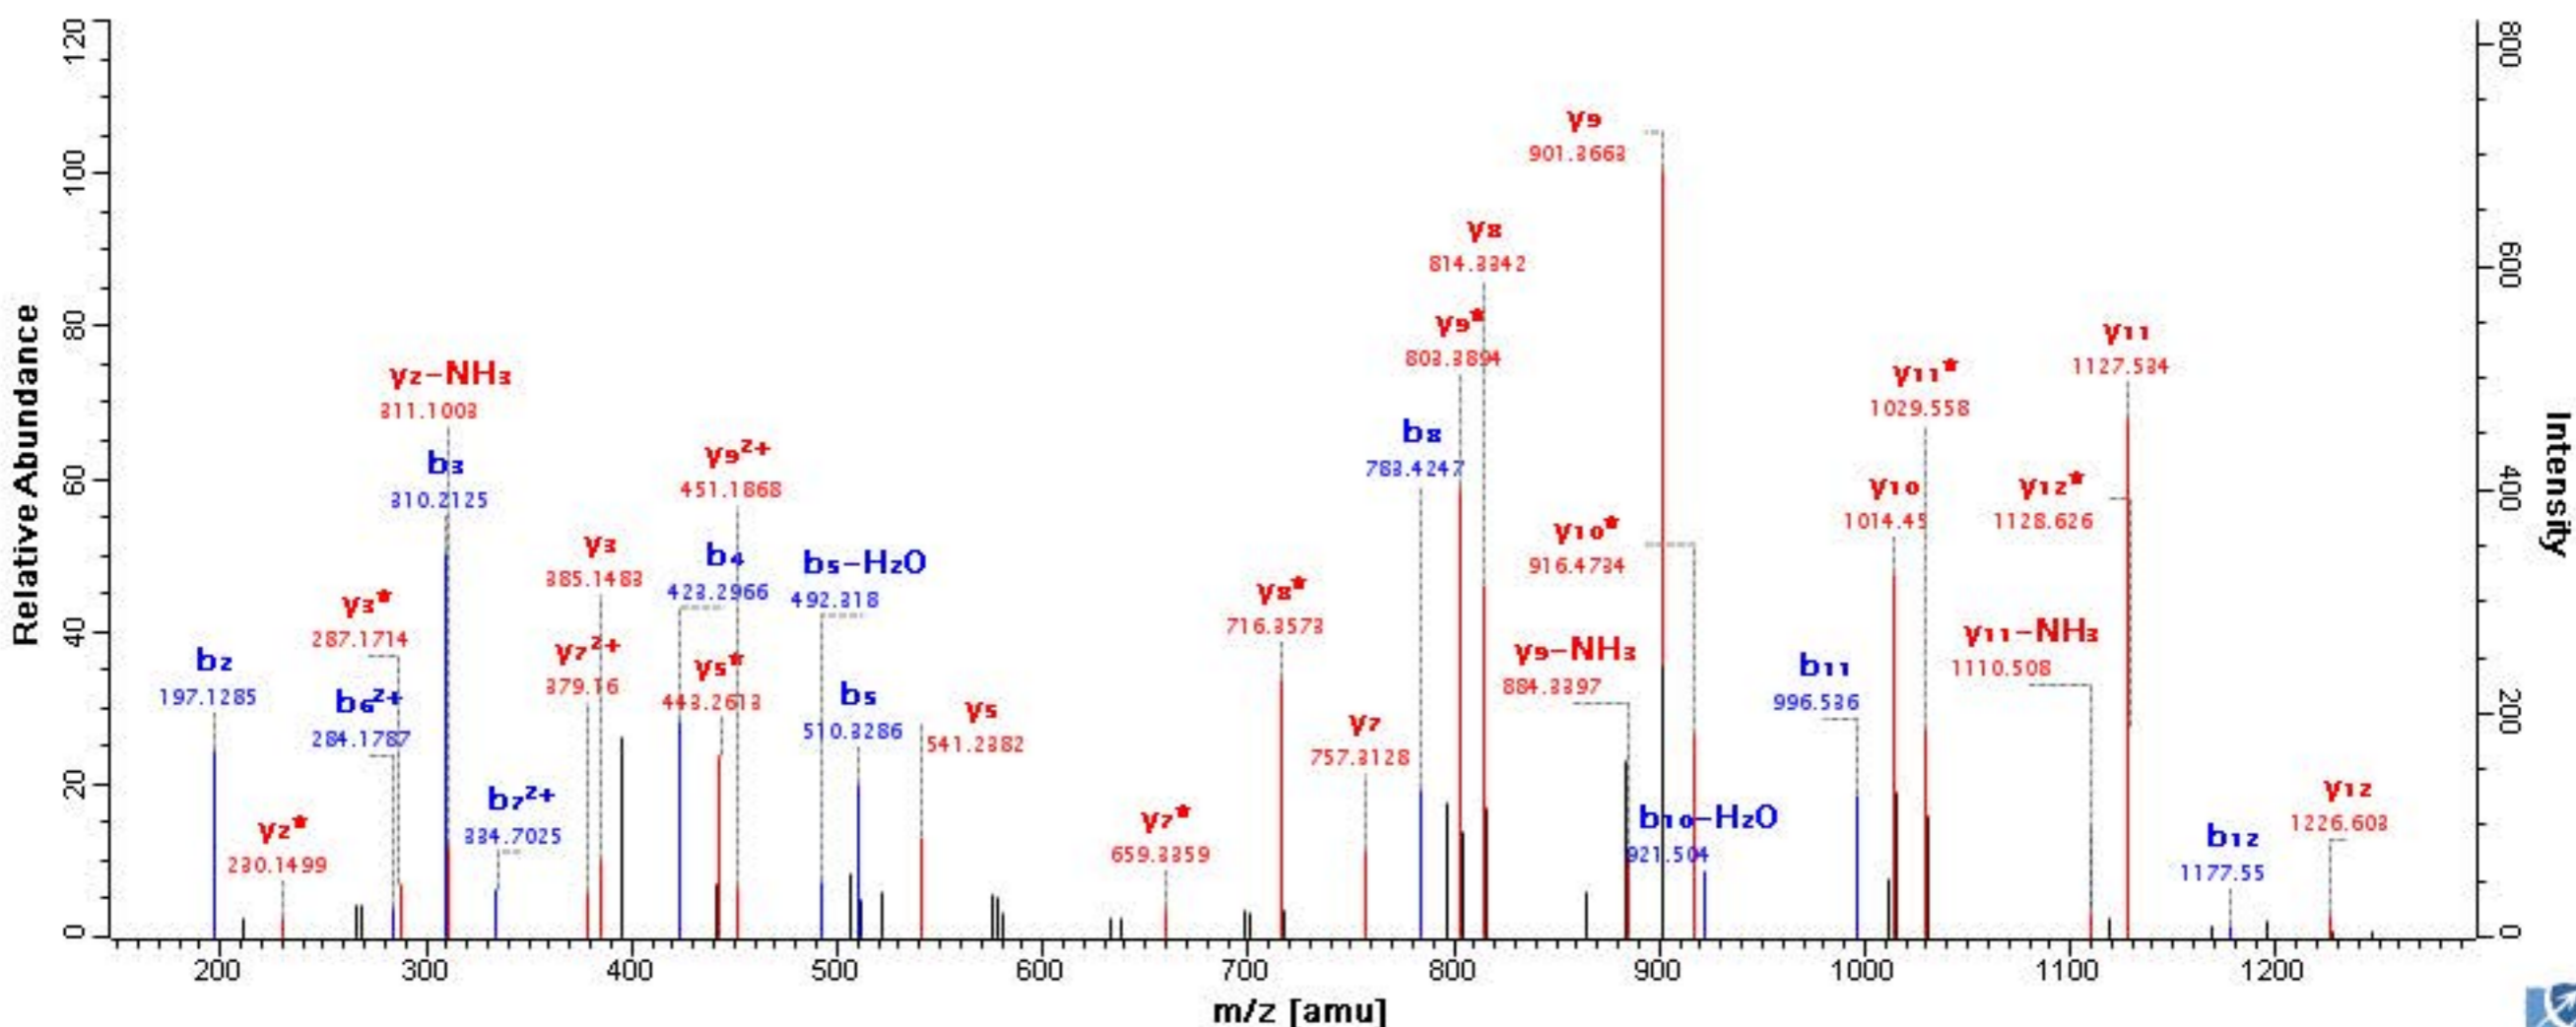

#### precursor information

|                   |                     |
|-------------------|---------------------|
| Mass:             | 1322.64853          |
| m/z:              | System.Collections. |
| Charge:           | System.Collections. |
| Retentiontime:    | System.Collections. |
| Score:            | 210.1489            |
| Mass Error [ppm]: | 0.17564             |
| PEP:              | 1.9371E-121         |
| Precursor Type:   | ISO                 |

#### general information

|                       |           |
|-----------------------|-----------|
| Annotation:           | 11 of 13  |
| AminoAcids Coverag    | 85 %      |
| Intensity Coverage:   | 73 %      |
| Protein Localisation: | 55 ... 67 |

| b <sup>2+</sup> ion |          | b ion     |          |    | seq |          | γ ion    |           | γ <sup>2+</sup> ion |           |
|---------------------|----------|-----------|----------|----|-----|----------|----------|-----------|---------------------|-----------|
| Δ dalton            | mass     | Δ dalton  | mass     |    |     | Δ dalton | mass     | Δ dalton  | mass                |           |
|                     | 98.06004 |           | 98.06004 | 1  | P   | 12       |          |           |                     |           |
|                     | 197.1285 | +0.065882 | 197.1285 | 2  | V   | 11       | 1226.603 | -0.034695 | 1226.603            |           |
|                     | 310.2125 | -0.135858 | 310.2125 | 3  | I   | 10       | 1127.534 | -0.192111 | 1127.534            |           |
|                     | 423.2966 | -0.13313  | 423.2966 | 4  | I   | 9        | 1014.45  | -0.057998 | 1014.45             |           |
|                     | 510.3286 | +0.056277 | 510.3286 | 5  | S   | 8        | 901.3663 | -0.090633 | 451.1868            | -0.248174 |
| +0.022985           | 284.1787 |           | 567.3501 | 6  | G   | 7        | 814.3342 | -0.001415 | 814.3342            |           |
| -0.380859           | 334.7025 |           | 668.3978 | 7  | T   | 6        | 757.3128 | -0.027803 | 379.16              | -0.048698 |
|                     | 783.4247 | +0.056444 | 783.4247 | 8  | D   | 5        | 656.2651 |           | 656.2651            |           |
|                     | 840.4462 |           | 840.4462 | 9  | G   | 4        | 541.2382 | +0.107793 | 541.2382            |           |
|                     | 939.5146 |           | 939.5146 | 10 | V   | 3        | 484.2167 |           | 484.2167            |           |
|                     | 996.536  | -0.088222 | 996.536  | 11 | G   | 2        | 385.1483 | -0.313072 | 385.1483            |           |
|                     | 1177.55  | -0.438108 | 1177.55  | 12 | T   | 1        | 328.1268 |           | 328.1268            |           |
|                     |          |           |          | 13 | K   | 0        | 147.1128 |           | 147.1128            |           |

Source: 20130212\_VR\_Bsu\_TripleSILAC\_pWTPPrkCPrpCReplicate3\_F23  
 Scannumber: 7056  
 Protein: ath; BSU06500; purM  
 Peptide Score: 110.55  
 Method: ITMS; CID; 3

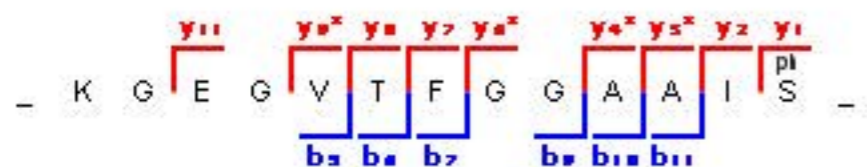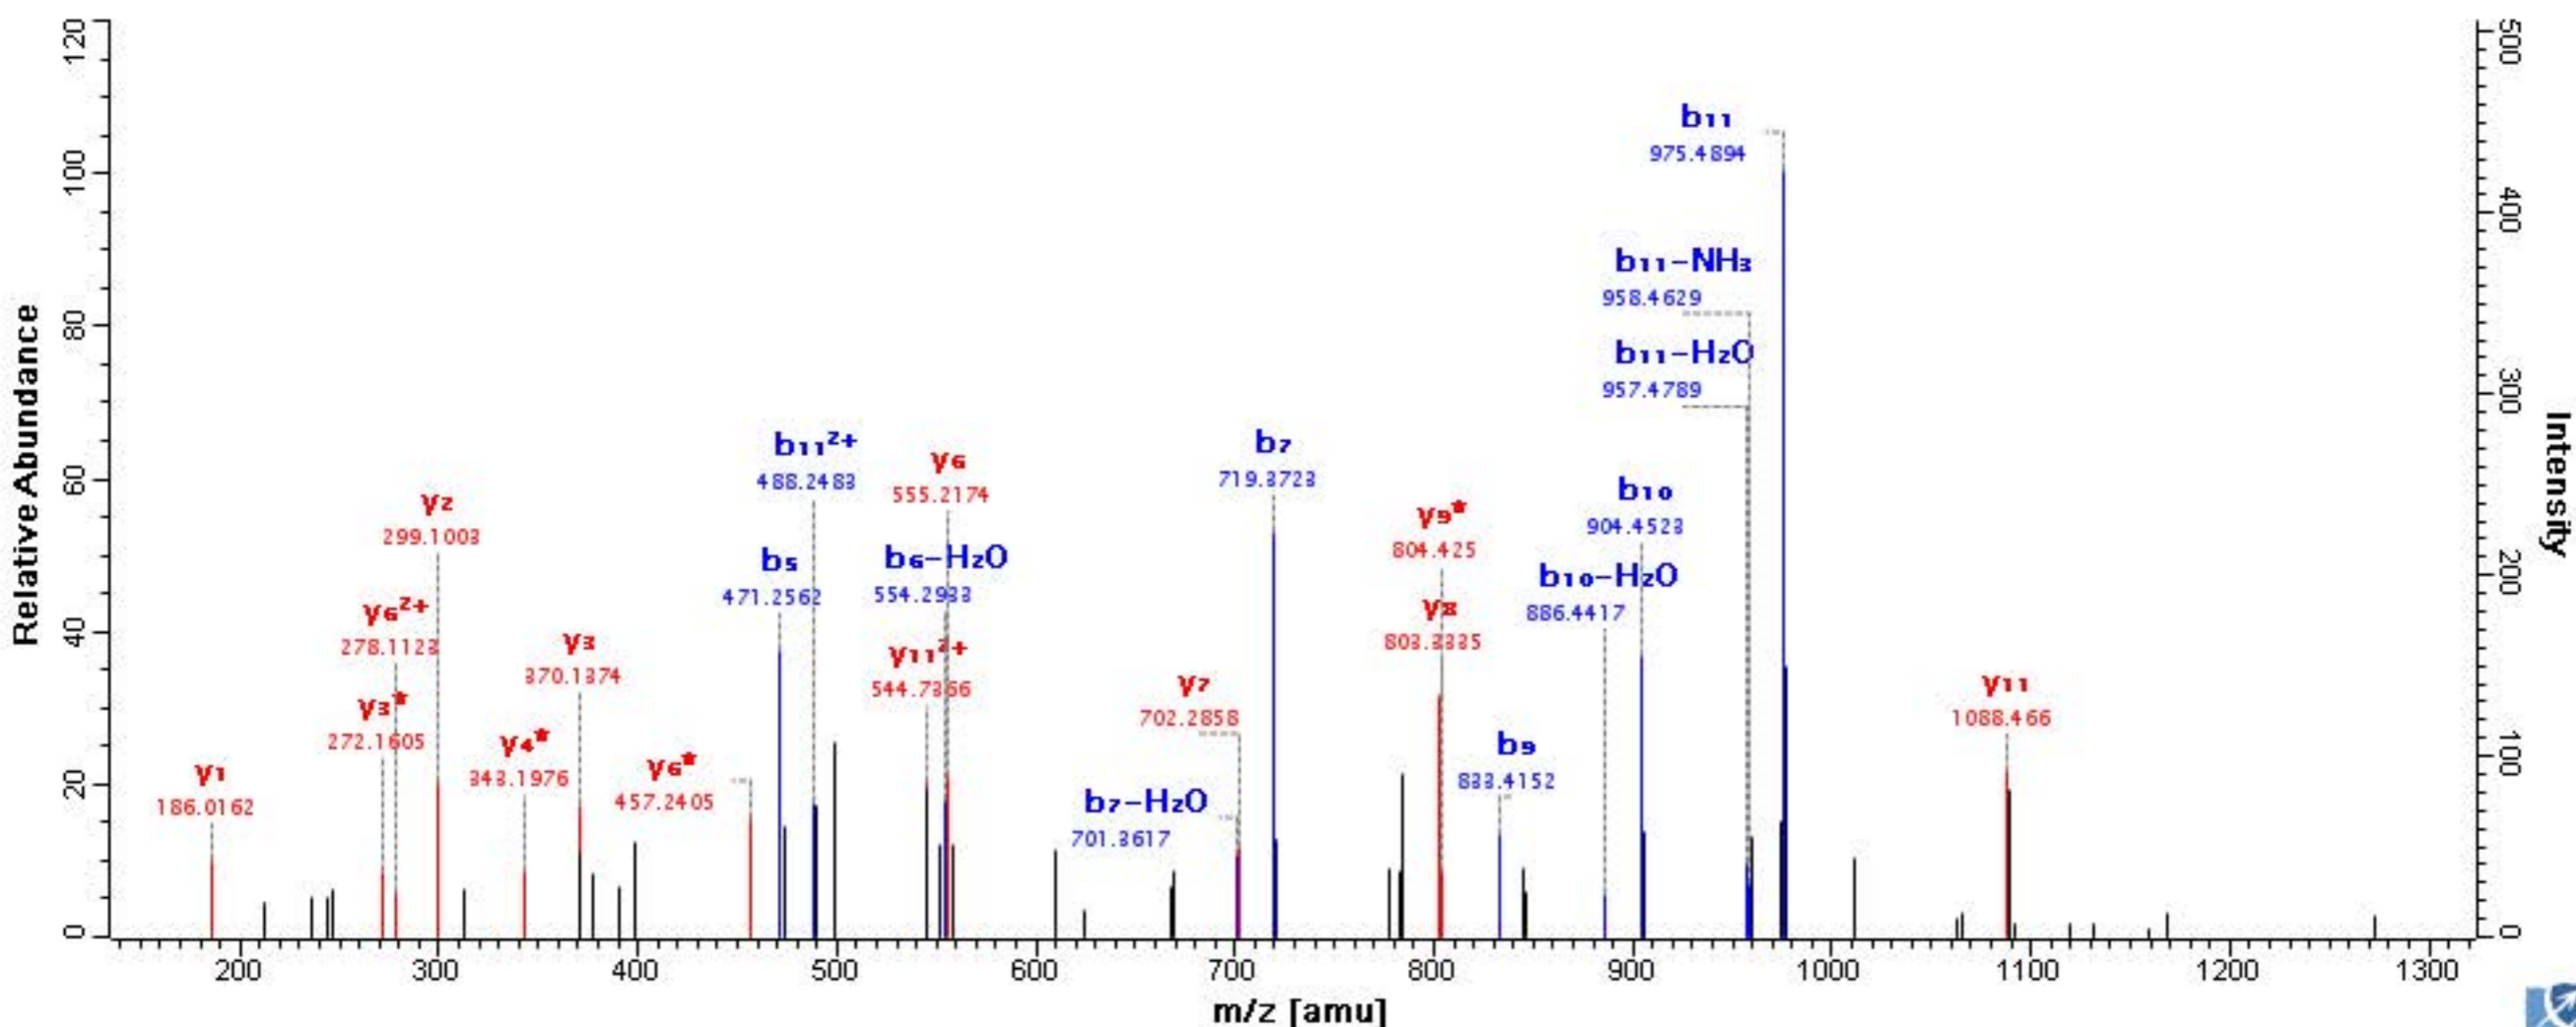

#### precursor information

|                   |                     |
|-------------------|---------------------|
| Mass:             | 1272.57523          |
| m/z:              | System.Collections. |
| Charge:           | System.Collections. |
| Retentiontime:    | System.Collections. |
| Score:            | 110.548             |
| Mass Error [ppm]: | 0.07932             |
| PEP:              | 4.6717E-07          |
| Precursor Type:   | MULTI               |

#### general information

|                       |             |
|-----------------------|-------------|
| Annotation:           | 11 of 13    |
| AminoAcids Coverag    | 85 %        |
| Intensity Coverage:   | 57 %        |
| Protein Localisation: | 334 ... 346 |

| b <sup>2+</sup> ion |          | b ion     |          |     | y ion |          | y <sup>2+</sup> ion |           |          |           |
|---------------------|----------|-----------|----------|-----|-------|----------|---------------------|-----------|----------|-----------|
| Δ dalton            | mass     | Δ dalton  | mass     | seq |       | Δ dalton | mass                | Δ dalton  | mass     |           |
|                     | 129.1022 |           | 129.1022 | 1   | K     | 12       |                     |           |          |           |
|                     | 186.1237 |           | 186.1237 | 2   | G     | 11       | 1145.487            |           | 1145.487 |           |
|                     | 315.1663 |           | 315.1663 | 3   | E     | 10       | 1088.466            | -0.064005 | 544.7366 | -0.101314 |
|                     | 372.1878 |           | 372.1878 | 4   | G     | 9        | 959.4234            |           | 959.4234 |           |
|                     | 471.2562 | -0.084177 | 471.2562 | 5   | V     | 8        | 902.4019            |           | 902.4019 |           |
|                     | 572.3039 |           | 572.3039 | 6   | T     | 7        | 803.3335            | -0.092117 | 803.3335 |           |
|                     | 719.3723 | -0.067518 | 719.3723 | 7   | F     | 6        | 702.2858            | -0.045171 | 702.2858 |           |
|                     | 776.3937 |           | 776.3937 | 8   | G     | 5        | 555.2174            | -0.032543 | 278.1123 | +0.15285  |
|                     | 833.4152 | +0.150297 | 833.4152 | 9   | G     | 4        | 498.196             |           | 498.196  |           |
|                     | 904.4523 | -0.083899 | 904.4523 | 10  | A     | 3        | 441.1745            |           | 441.1745 |           |
| +0.147586           | 488.2483 | -0.002544 | 975.4894 | 11  | A     | 2        | 370.1374            | +0.036695 | 370.1374 |           |
|                     | 1088.573 |           | 1088.573 | 12  | I     | 1        | 299.1003            | -0.023848 | 299.1003 |           |
|                     |          |           |          | 13  | S     | 0        | 186.0162            | -0.352015 | 186.0162 |           |
