# Supplementary material
Source: PubMed Central journal article supplement (PMC4125730)
Supplement: supp_M113.035949_mcp.M113.035949-8.pdf [file supp_M113.035949_mcp.M113.035949-8.pdf]

Source: 20120529\_VR\_Bsu\_TripleSILAC\_pWTPPrkCPrpC\_F15  
 Scannumber: 4810  
 Protein: BSU36600; mta; ywnD  
 Peptide Score: 137.62  
 Method: ITMS; CID; 3

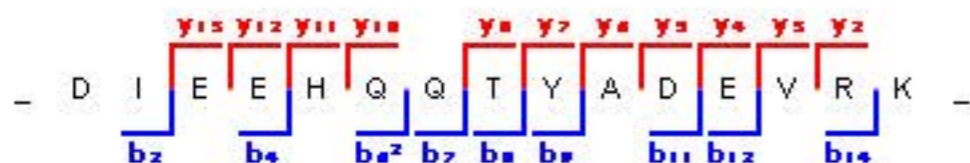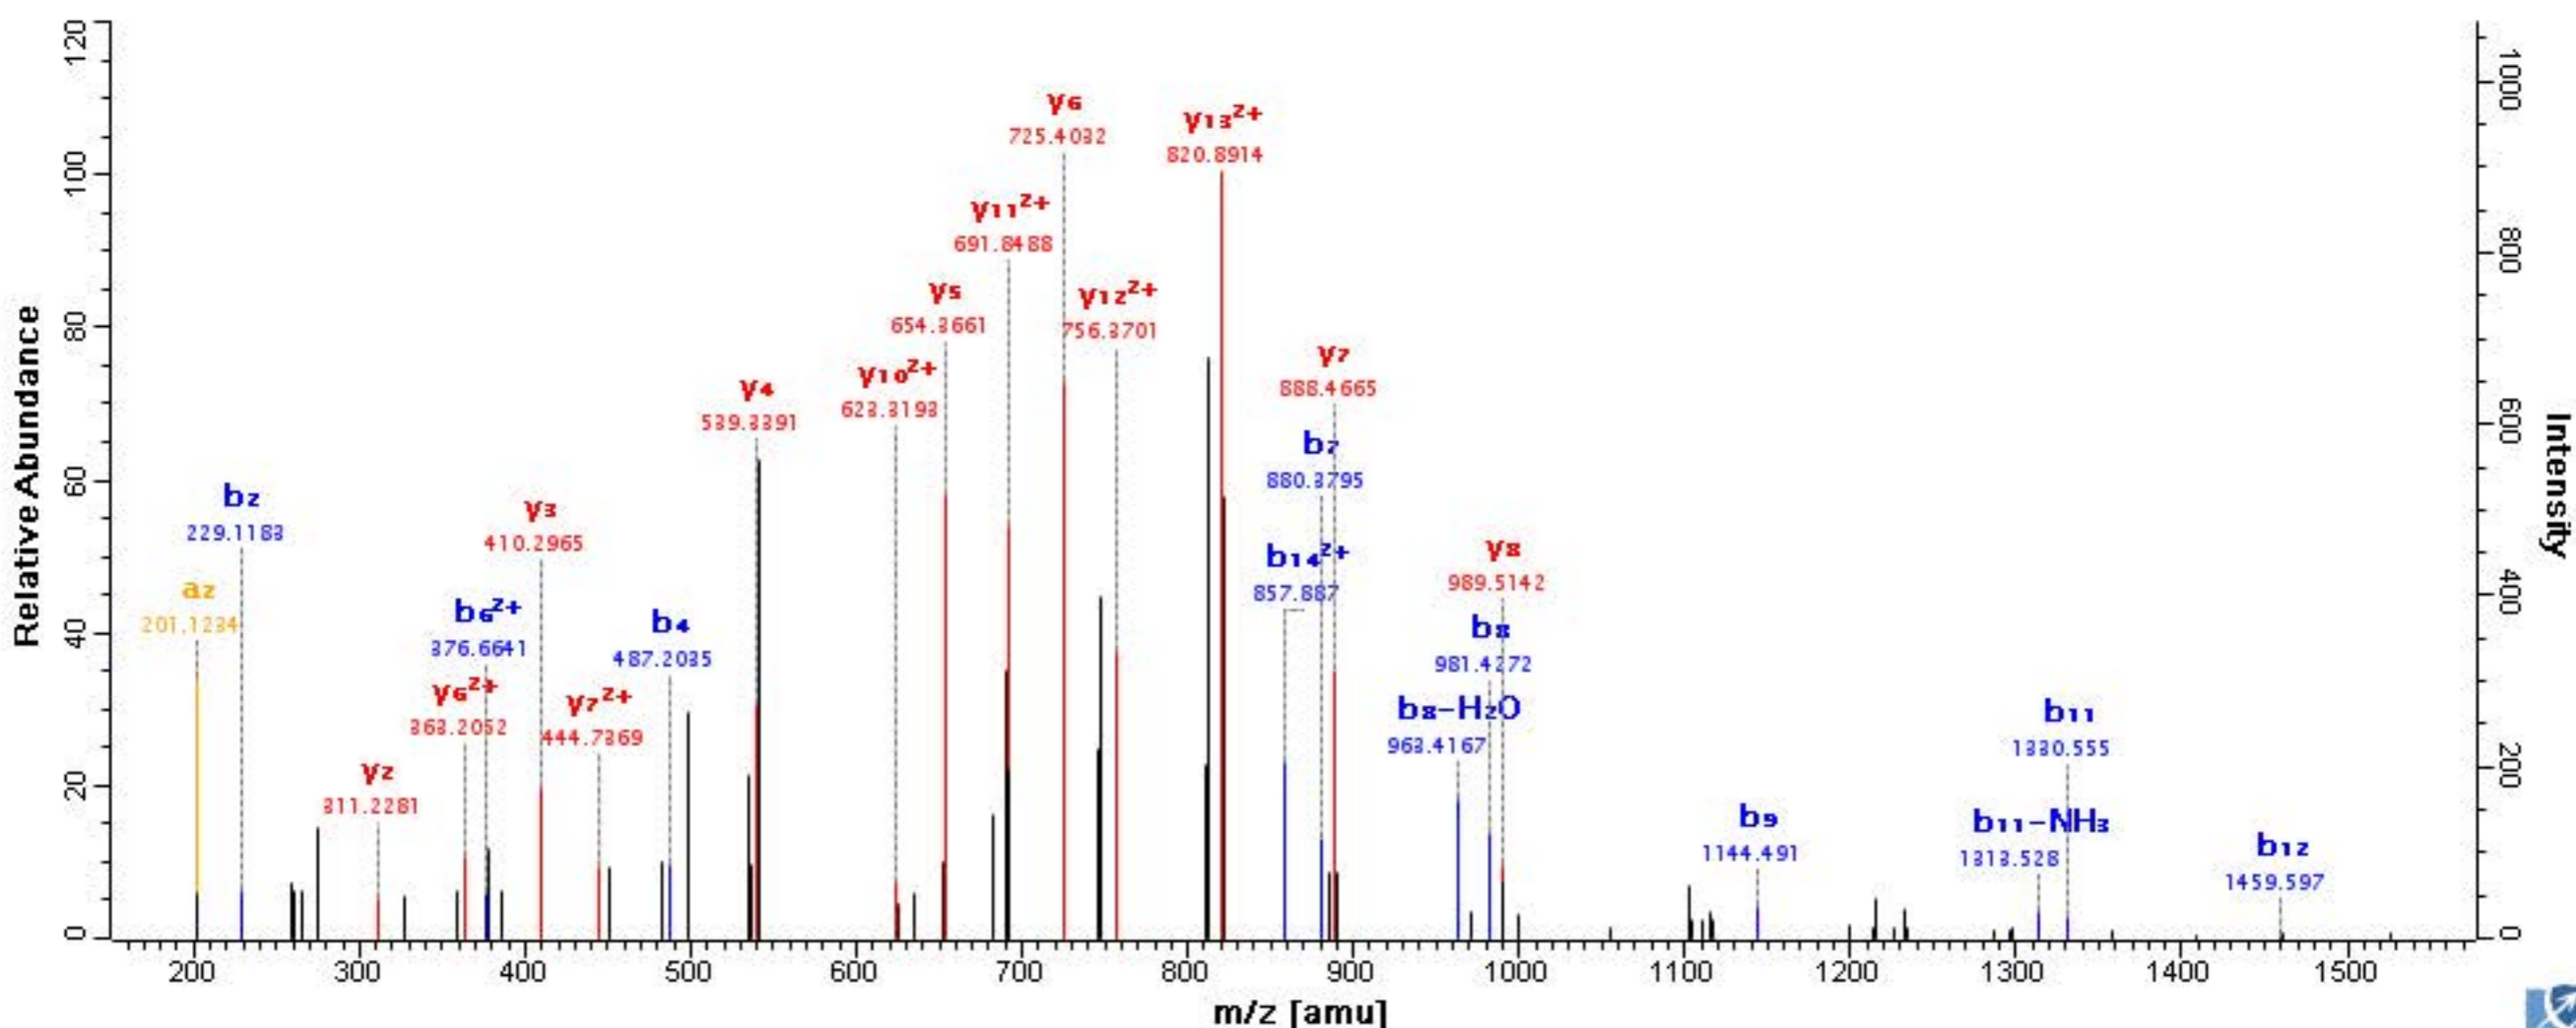

#### precursor information

|                   |                     |
|-------------------|---------------------|
| Mass:             | 1859.86509          |
| m/z:              | System.Collections. |
| Charge:           | System.Collections. |
| Retentiontime:    | System.Collections. |
| Score:            | 137.6248            |
| Mass Error [ppm]: | 0.064723            |
| PEP:              | 6.1707E-17          |
| Precursor Type:   | MULTI               |

| a ion    |         | b <sup>2+</sup> ion |         | b ion    |         |    |     | y ion    |         | y <sup>2+</sup> ion |                 |
|----------|---------|---------------------|---------|----------|---------|----|-----|----------|---------|---------------------|-----------------|
| Δ dalton | mass    | Δ dalton            | mass    | Δ dalton | mass    |    | seq | Δ dalton | mass    | Δ dalton            | mass            |
|          | 88.0393 |                     | 116.034 |          | 116.034 | 1  | D   | 14       |         |                     |                 |
| +0.04297 | 201.123 |                     | 229.118 | -0.0792  | 229.118 | 2  | I   | 13       | 1753.86 |                     | 1753.86         |
|          | 330.166 |                     | 358.161 |          | 358.161 | 3  | E   | 12       | 1640.78 |                     | 820.891 +0.0082 |
|          | 459.209 |                     | 487.203 | +0.0099  | 487.203 | 4  | E   | 11       | 1511.73 |                     | 756.37 +0.1854  |
|          | 596.267 |                     | 624.262 |          | 624.262 | 5  | H   | 10       | 1382.69 |                     | 691.849 +0.1044 |
|          | 724.326 | +0.1874             | 724.326 |          | 752.321 | 6  | Q   | 9        | 1245.63 |                     | 623.319 +0.2977 |
|          | 852.385 |                     | 880.38  | +0.0345  | 880.38  | 7  | Q   | 8        | 1117.57 |                     | 1117.57         |
|          | 953.432 |                     | 981.427 | +0.0010  | 981.427 | 8  | T   | 7        | 989.514 | +0.1455             | 989.514         |
|          | 1116.5  |                     | 1144.49 | +0.0587  | 1144.49 | 9  | Y   | 6        | 888.467 | -0.0214             | 444.737 +0.2668 |
|          | 1187.53 |                     | 1215.53 |          | 1215.53 | 10 | A   | 5        | 725.403 | -0.0165             | 363.205 +0.2179 |
|          | 1302.56 |                     | 1330.55 | +0.0173  | 1330.55 | 11 | D   | 4        | 654.366 | +0.0617             | 654.366         |
|          | 1431.6  |                     | 1459.6  | +0.2482  | 1459.6  | 12 | E   | 3        | 539.339 | +0.0476             | 539.339         |
|          | 1530.67 |                     | 1558.67 |          | 1558.67 | 13 | V   | 2        | 410.297 | +0.0924             | 410.297         |
|          | 1686.77 | +0.2211             | 1686.77 |          | 1714.77 | 14 | R   | 1        | 311.228 | -0.0168             | 311.228         |
|          |         |                     |         |          |         | 15 | K   | 0        | 155.127 |                     | 155.127         |

#### general information

|                       |             |
|-----------------------|-------------|
| Annotation:           | 13 of 15    |
| AminoAcids Coverage:  | 87 %        |
| Intensity Coverage:   | 47 %        |
| Protein Localisation: | 127 ... 141 |

Source: 20120529\_VR\_Bsu\_TripleSILAC\_pWTPPrkCPrpC\_F17  
 Scannumber: 4516  
 Protein: BSU09030; yhcC  
 Peptide Score: 98.59  
 Method: ITMS; CID; 3

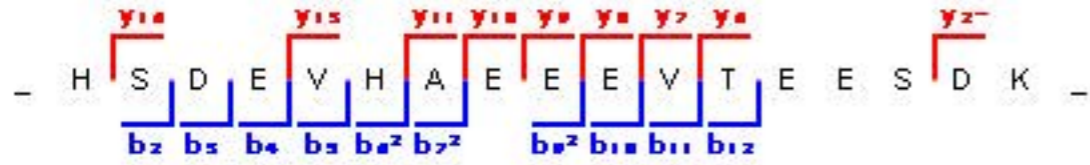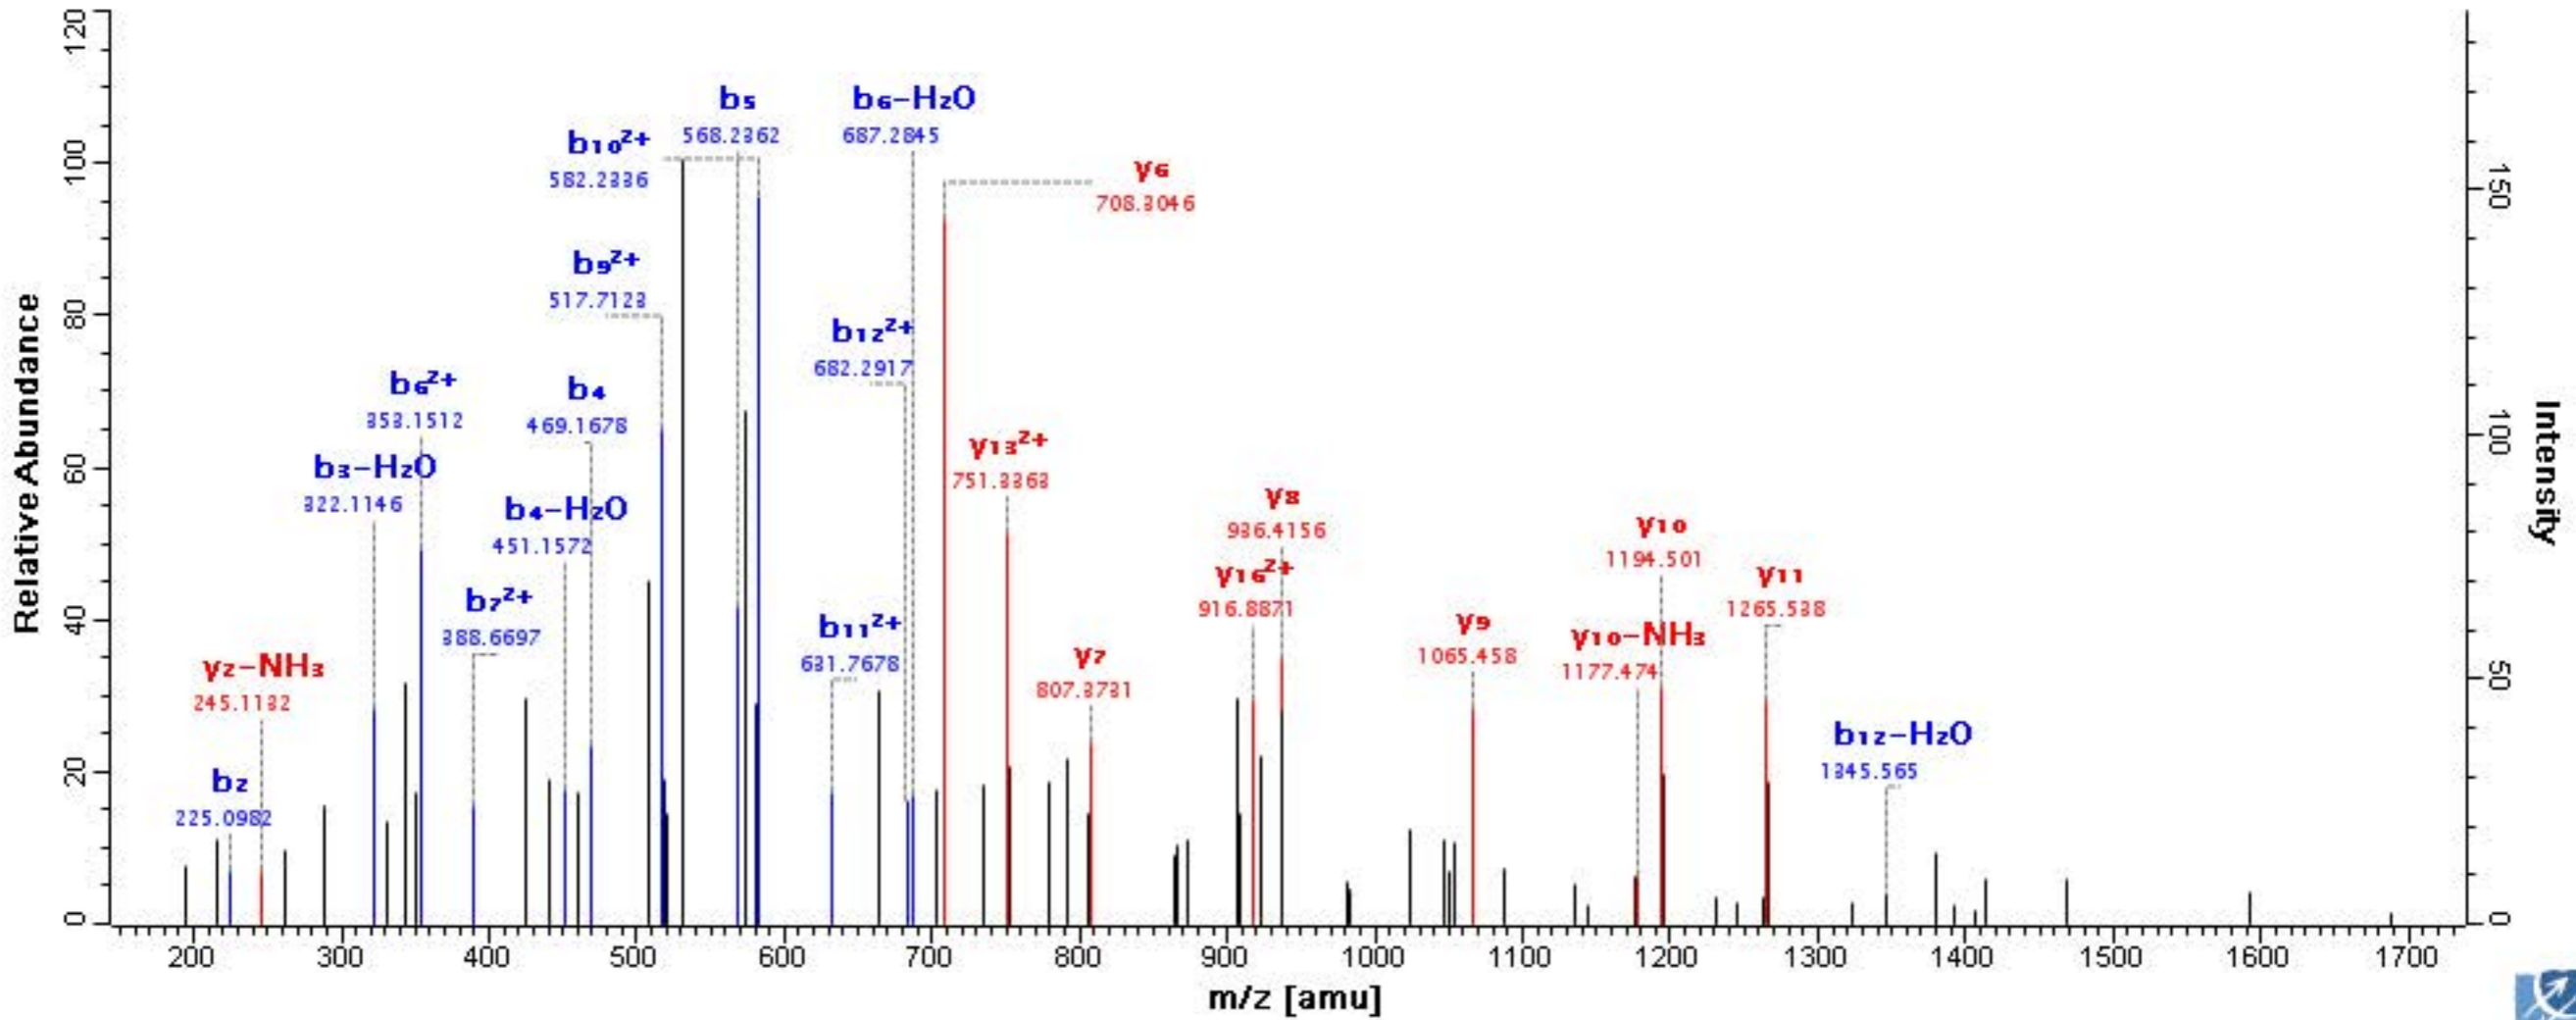

**precursor information**

|                   |                     |
|-------------------|---------------------|
| Mass:             | 1968.81813          |
| m/z:              | System.Collections. |
| Charge:           | System.Collections. |
| Retentiontime:    | System.Collections. |
| Score:            | 98.59244            |
| Mass Error [ppm]: | -0.17213            |
| PEP:              | 1.9605E-08          |
| Precursor Type:   | MULTI               |

| b <sup>2+</sup> ion |          | b ion     |          |     | y ion |          | y <sup>2+</sup> ion |           |          |           |
|---------------------|----------|-----------|----------|-----|-------|----------|---------------------|-----------|----------|-----------|
| Δ dalton            | mass     | Δ dalton  | mass     | seq |       | Δ dalton | mass                | Δ dalton  | mass     |           |
|                     | 138.0662 |           | 138.0662 | 1   | H     | 16       |                     |           |          |           |
|                     | 225.0982 | -0.155361 | 225.0982 | 2   | S     | 15       | 1832.767            |           | 916.8871 | +0.073575 |
|                     | 340.1252 |           | 340.1252 | 3   | D     | 14       | 1745.735            |           | 1745.735 |           |
|                     | 469.1678 | +0.180758 | 469.1678 | 4   | E     | 13       | 1630.708            |           | 1630.708 |           |
|                     | 568.2362 | -0.087058 | 568.2362 | 5   | V     | 12       | 1501.665            |           | 751.3363 | -0.018648 |
| +0.088935           | 353.1512 |           | 705.2951 | 6   | H     | 11       | 1402.597            |           | 1402.597 |           |
| -0.110897           | 388.6697 |           | 776.3322 | 7   | A     | 10       | 1265.538            | -0.065413 | 1265.538 |           |
|                     | 905.3748 |           | 905.3748 | 8   | E     | 9        | 1194.501            | -0.036356 | 1194.501 |           |
| -0.111803           | 517.7123 |           | 1034.417 | 9   | E     | 8        | 1065.458            | +0.172131 | 1065.458 |           |
| +0.167316           | 582.2336 |           | 1163.46  | 10  | E     | 7        | 936.4156            | +0.101015 | 936.4156 |           |
| +0.30596            | 631.7678 |           | 1262.528 | 11  | V     | 6        | 807.3731            | +0.013481 | 807.3731 |           |
| +0.449358           | 682.2917 |           | 1363.576 | 12  | T     | 5        | 708.3046            | +0.012865 | 708.3046 |           |
|                     | 1492.619 |           | 1492.619 | 13  | E     | 4        | 607.257             |           | 607.257  |           |
|                     | 1621.661 |           | 1621.661 | 14  | E     | 3        | 478.2144            |           | 478.2144 |           |
|                     | 1708.693 |           | 1708.693 | 15  | S     | 2        | 349.1718            |           | 349.1718 |           |
|                     | 1823.72  |           | 1823.72  | 16  | D     | 1        | 262.1397            |           | 262.1397 |           |
|                     |          |           |          | 17  | K     | 0        | 147.1128            |           | 147.1128 |           |

**general information**

|                       |            |
|-----------------------|------------|
| Annotation:           | 12 of 17   |
| AminoAcids Coverag    | 71 %       |
| Intensity Coverage:   | 45 %       |
| Protein Localisation: | 90 ... 106 |

Source: 20120530\_VR\_Bsu\_TripleSILAC\_pWTPPrkCPrpC\_F03  
 Scannumber: 4862  
 Protein: BSU18350; dacC; pbp  
 Peptide Score: 100.48  
 Method: ITMS; CID; 3

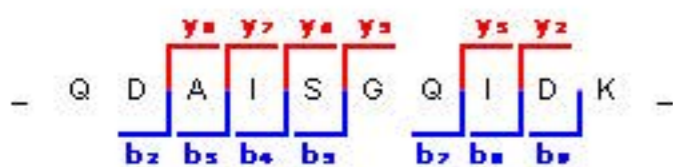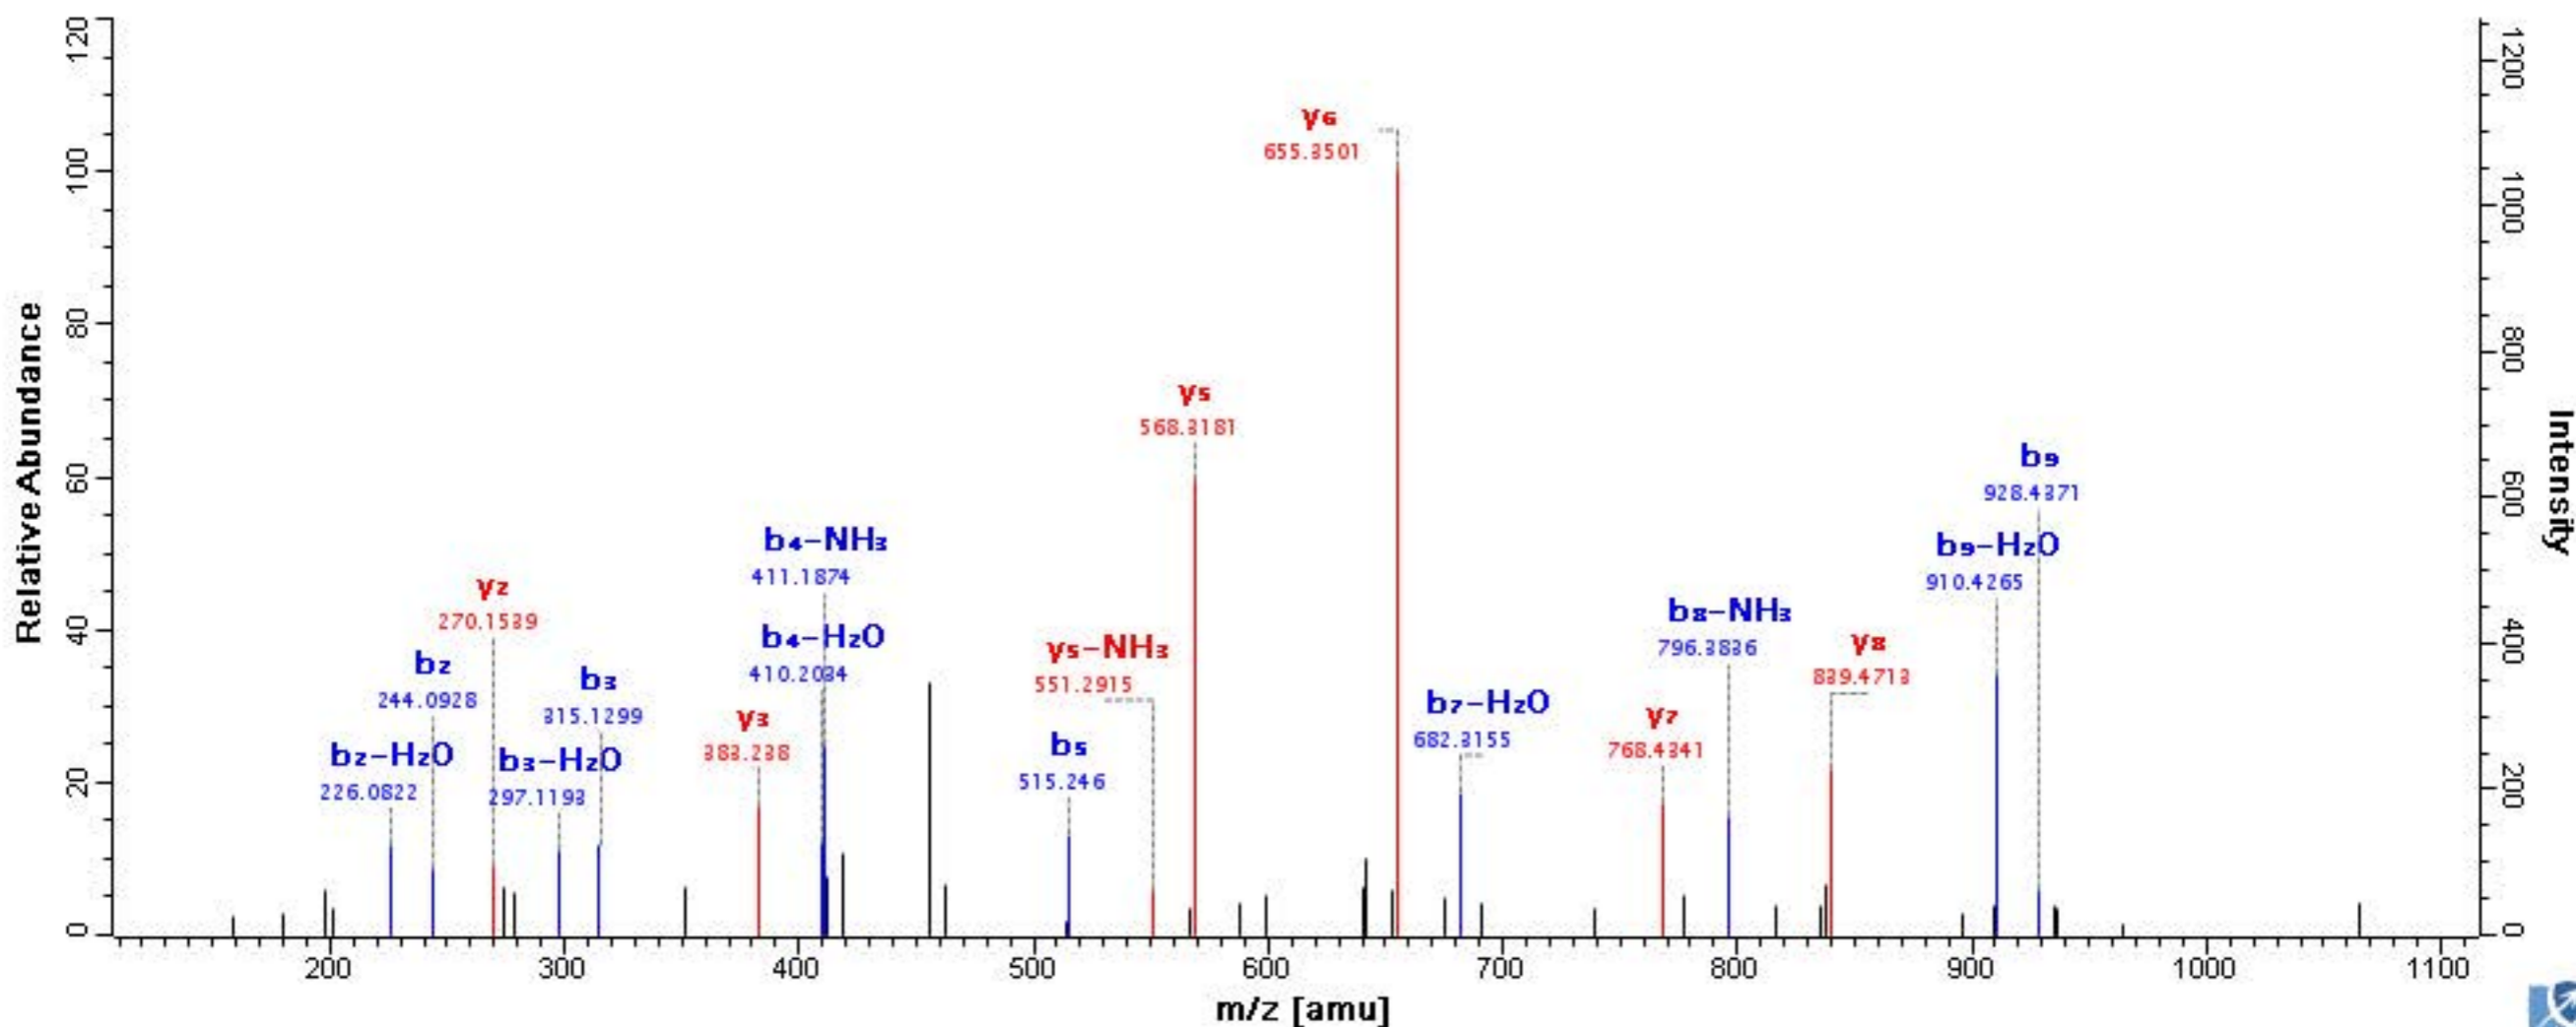

**precursor information**

|                   |                     |
|-------------------|---------------------|
| Mass:             | 1081.54979          |
| m/z:              | System.Collections. |
| Charge:           | System.Collections. |
| Retentiontime:    | System.Collections. |
| Score:            | 100.4767            |
| Mass Error [ppm]: | 0.2713              |
| PEP:              | 0.0011819           |
| Precursor Type:   | ISO                 |

**general information**

|                       |           |
|-----------------------|-----------|
| Annotation:           | 8 of 10   |
| AminoAcids Coverage:  | 80 %      |
| Intensity Coverage:   | 68 %      |
| Protein Localisation: | 33 ... 42 |

| b ion           |               |    |     |   |                 | y ion      |  |
|-----------------|---------------|----|-----|---|-----------------|------------|--|
| $\Delta$ dalton | mass          |    | seq |   | $\Delta$ dalton | mass       |  |
|                 | 129.065853978 | 1  | Q   | 9 |                 |            |  |
| +0.0385812      | 244.09279701  | 2  | D   | 8 | 954.498200441   |            |  |
| -0.1800817      | 315.129910798 | 3  | A   | 7 | 839.471257409   | +0.0626781 |  |
|                 | 428.213974778 | 4  | I   | 6 | 768.434143622   | -0.0800787 |  |
| +0.1116018      | 515.246003188 | 5  | S   | 5 | 655.350079641   | +0.0032529 |  |
|                 | 572.267466912 | 6  | G   | 4 | 568.318051231   | +0.1179839 |  |
|                 | 700.326044423 | 7  | Q   | 3 | 511.296587508   |            |  |
|                 | 813.410108404 | 8  | I   | 2 | 383.238009996   | +0.058865  |  |
| +0.2957977      | 928.437051435 | 9  | D   | 1 | 270.153946016   | -0.0373689 |  |
|                 |               | 10 | K   | 0 | 155.127002984   |            |  |

Source: 20120530\_VR\_Bsu\_TripleSILAC\_pWTPPrkCPrpC\_F07  
 Scannumber: 10865  
 Protein: BSU39200; yxzC  
 Peptide Score: 66.25  
 Method: ITMS; CID; 3

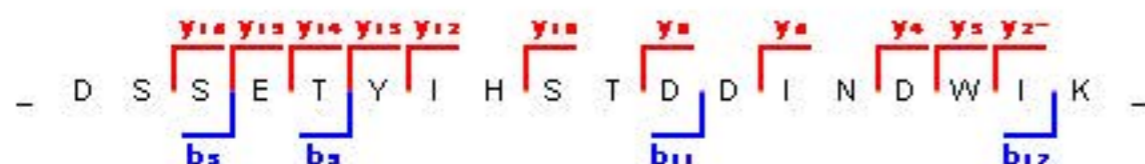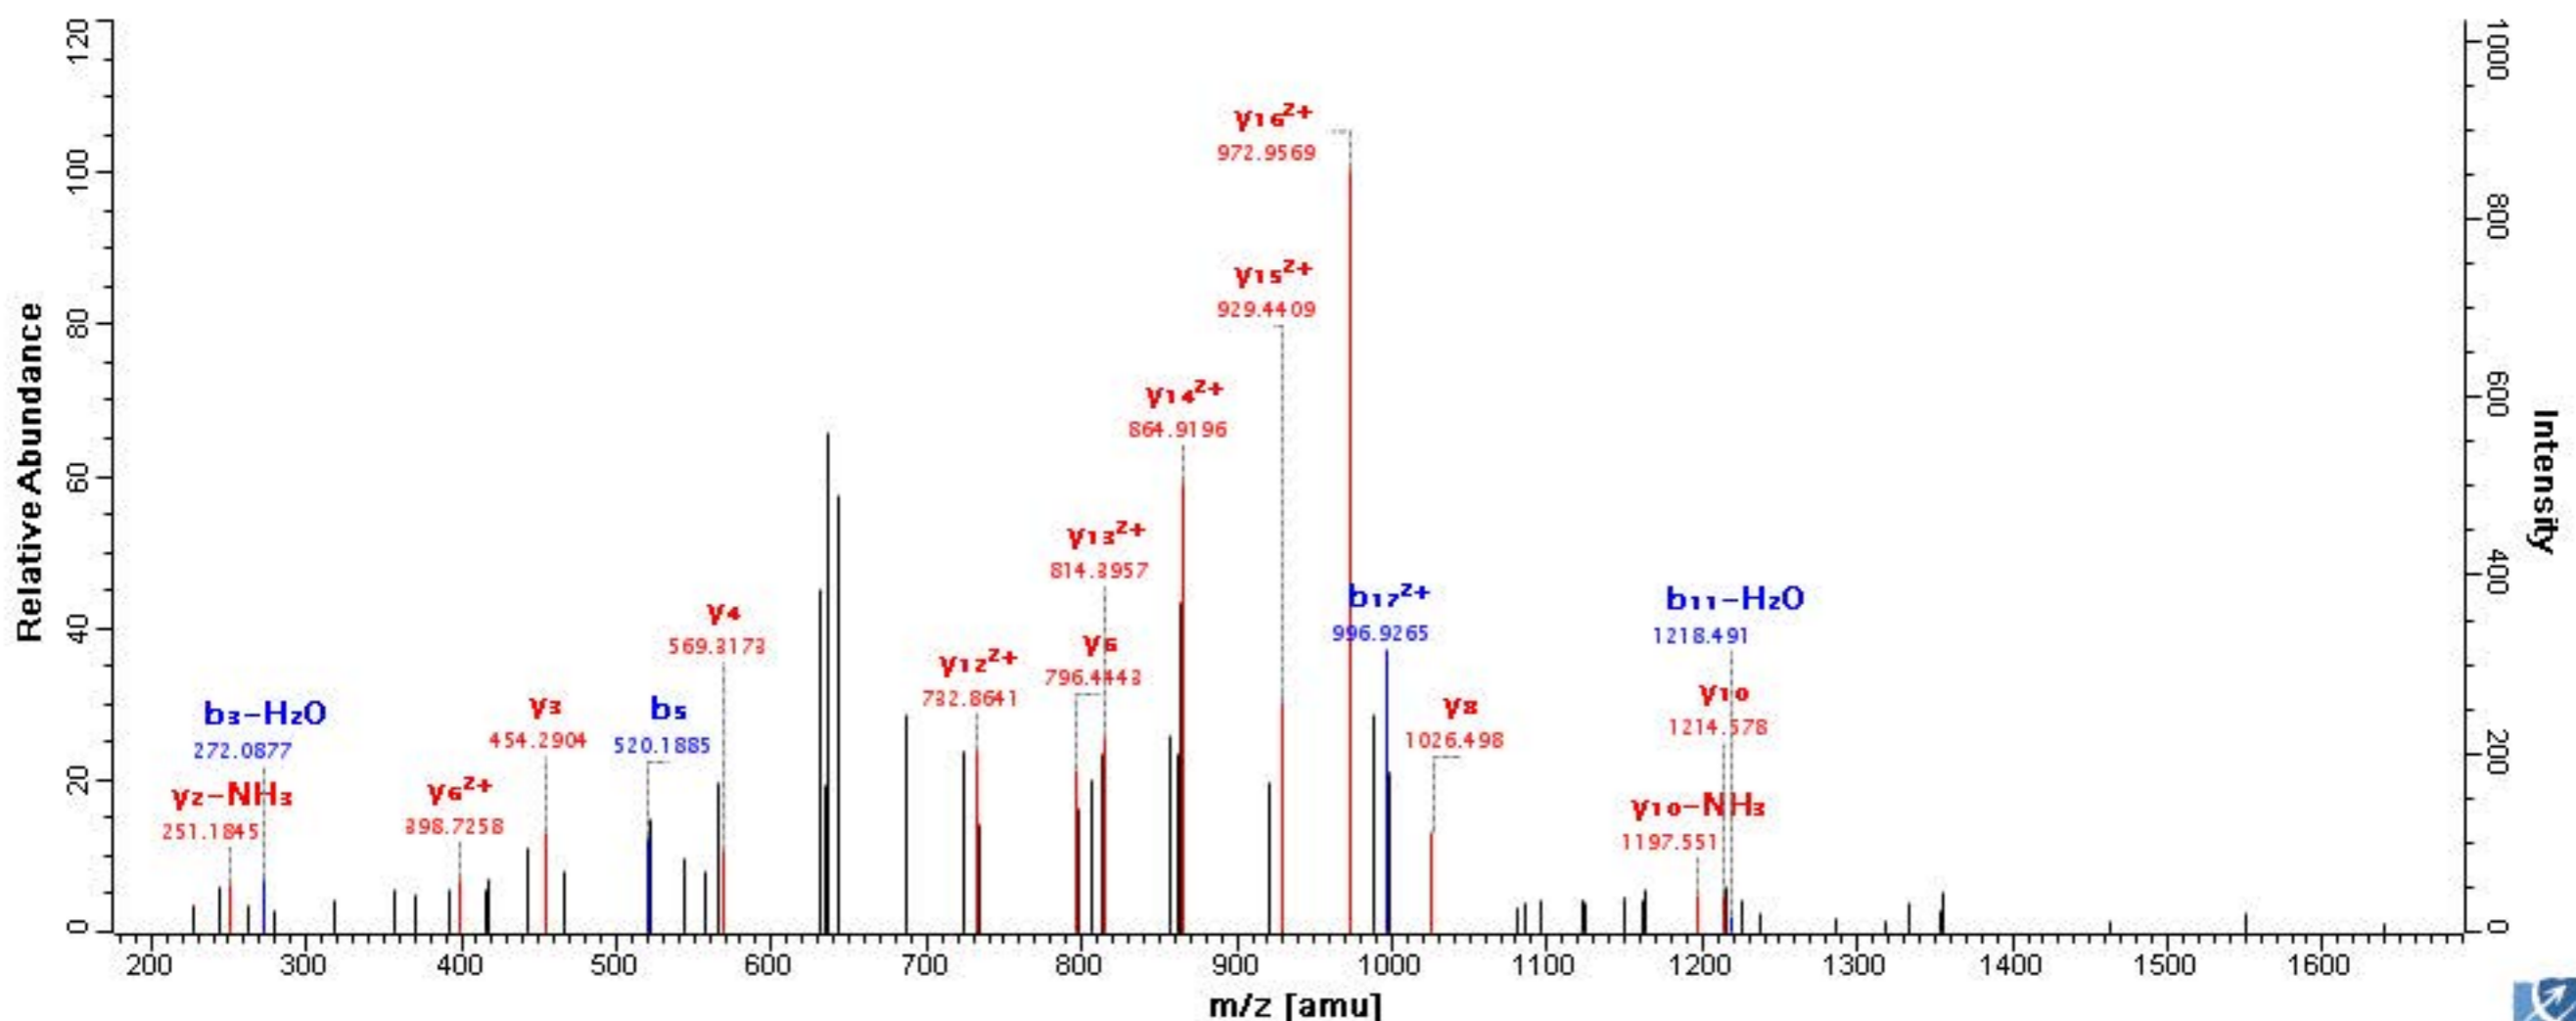

#### precursor information

|                   |                     |
|-------------------|---------------------|
| Mass:             | 2137.94518          |
| m/z:              | System.Collections. |
| Charge:           | System.Collections. |
| Retentiontime:    | System.Collections. |
| Score:            | 66.24619            |
| Mass Error [ppm]: | 0.54465             |
| PEP:              | 0.00063464          |
| Precursor Type:   | MULTI               |

#### general information

|                       |             |
|-----------------------|-------------|
| Annotation:           | 11 of 18    |
| AminoAcids Coverage:  | 61 %        |
| Intensity Coverage:   | 31 %        |
| Protein Localisation: | 101 ... 118 |

| b <sup>2+</sup> ion |           | b ion     |          |    |     |    | y ion    |           | y <sup>2+</sup> ion |           |
|---------------------|-----------|-----------|----------|----|-----|----|----------|-----------|---------------------|-----------|
| Δ dalton            | mass      | Δ dalton  | mass     |    | seq |    | Δ dalton | mass      | Δ dalton            | mass      |
|                     | 116.0342  |           | 116.0342 | 1  | D   | 17 |          |           |                     |           |
|                     | 203.0662  |           | 203.0662 | 2  | S   | 16 | 2031.939 |           | 2031.939            |           |
|                     | 290.0983  |           | 290.0983 | 3  | S   | 15 | 1944.907 |           | 972.9569            | +0.217117 |
|                     | 419.1409  |           | 419.1409 | 4  | E   | 14 | 1857.874 |           | 929.4409            | +0.268166 |
|                     | 520.1885  | -0.039317 | 520.1885 | 5  | T   | 13 | 1728.832 |           | 864.9196            | +0.352695 |
|                     | 683.2519  |           | 683.2519 | 6  | Y   | 12 | 1627.784 |           | 814.3957            | +0.177925 |
|                     | 796.3359  |           | 796.3359 | 7  | I   | 11 | 1464.721 |           | 732.8641            | +0.179072 |
|                     | 933.3949  |           | 933.3949 | 8  | H   | 10 | 1351.637 |           | 1351.637            |           |
|                     | 1020.427  |           | 1020.427 | 9  | S   | 9  | 1214.578 | -0.044826 | 1214.578            |           |
|                     | 1121.475  |           | 1121.475 | 10 | T   | 8  | 1127.546 |           | 1127.546            |           |
|                     | 1236.502  |           | 1236.502 | 11 | D   | 7  | 1026.498 | -0.396394 | 1026.498            |           |
|                     | 1351.528  |           | 1351.528 | 12 | D   | 6  | 911.4713 |           | 911.4713            |           |
|                     | 1464.613  |           | 1464.613 | 13 | I   | 5  | 796.4443 | +0.029074 | 398.7258            | +0.481785 |
|                     | 1578.655  |           | 1578.655 | 14 | N   | 4  | 683.3603 |           | 683.3603            |           |
|                     | 1693.682  |           | 1693.682 | 15 | D   | 3  | 569.3173 | +0.112059 | 569.3173            |           |
|                     | 1879.762  |           | 1879.762 | 16 | W   | 2  | 454.2904 | +0.047877 | 454.2904            |           |
|                     | -0.033694 | 996.9265  | 1992.846 | 17 | I   | 1  | 268.2111 |           | 268.2111            |           |
|                     |           |           |          | 18 | K   | 0  | 155.127  |           | 155.127             |           |

Source: 20120530\_VR\_Bsu\_TripleSILAC\_pWTPPrkCPrpC\_F09  
 Scannumber: 3173  
 Protein: BSU25590; comE1; comEA  
 Peptide Score: 190.24  
 Method: ITMS; CID; 3

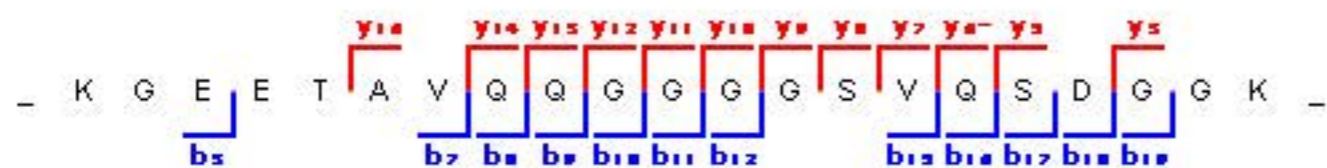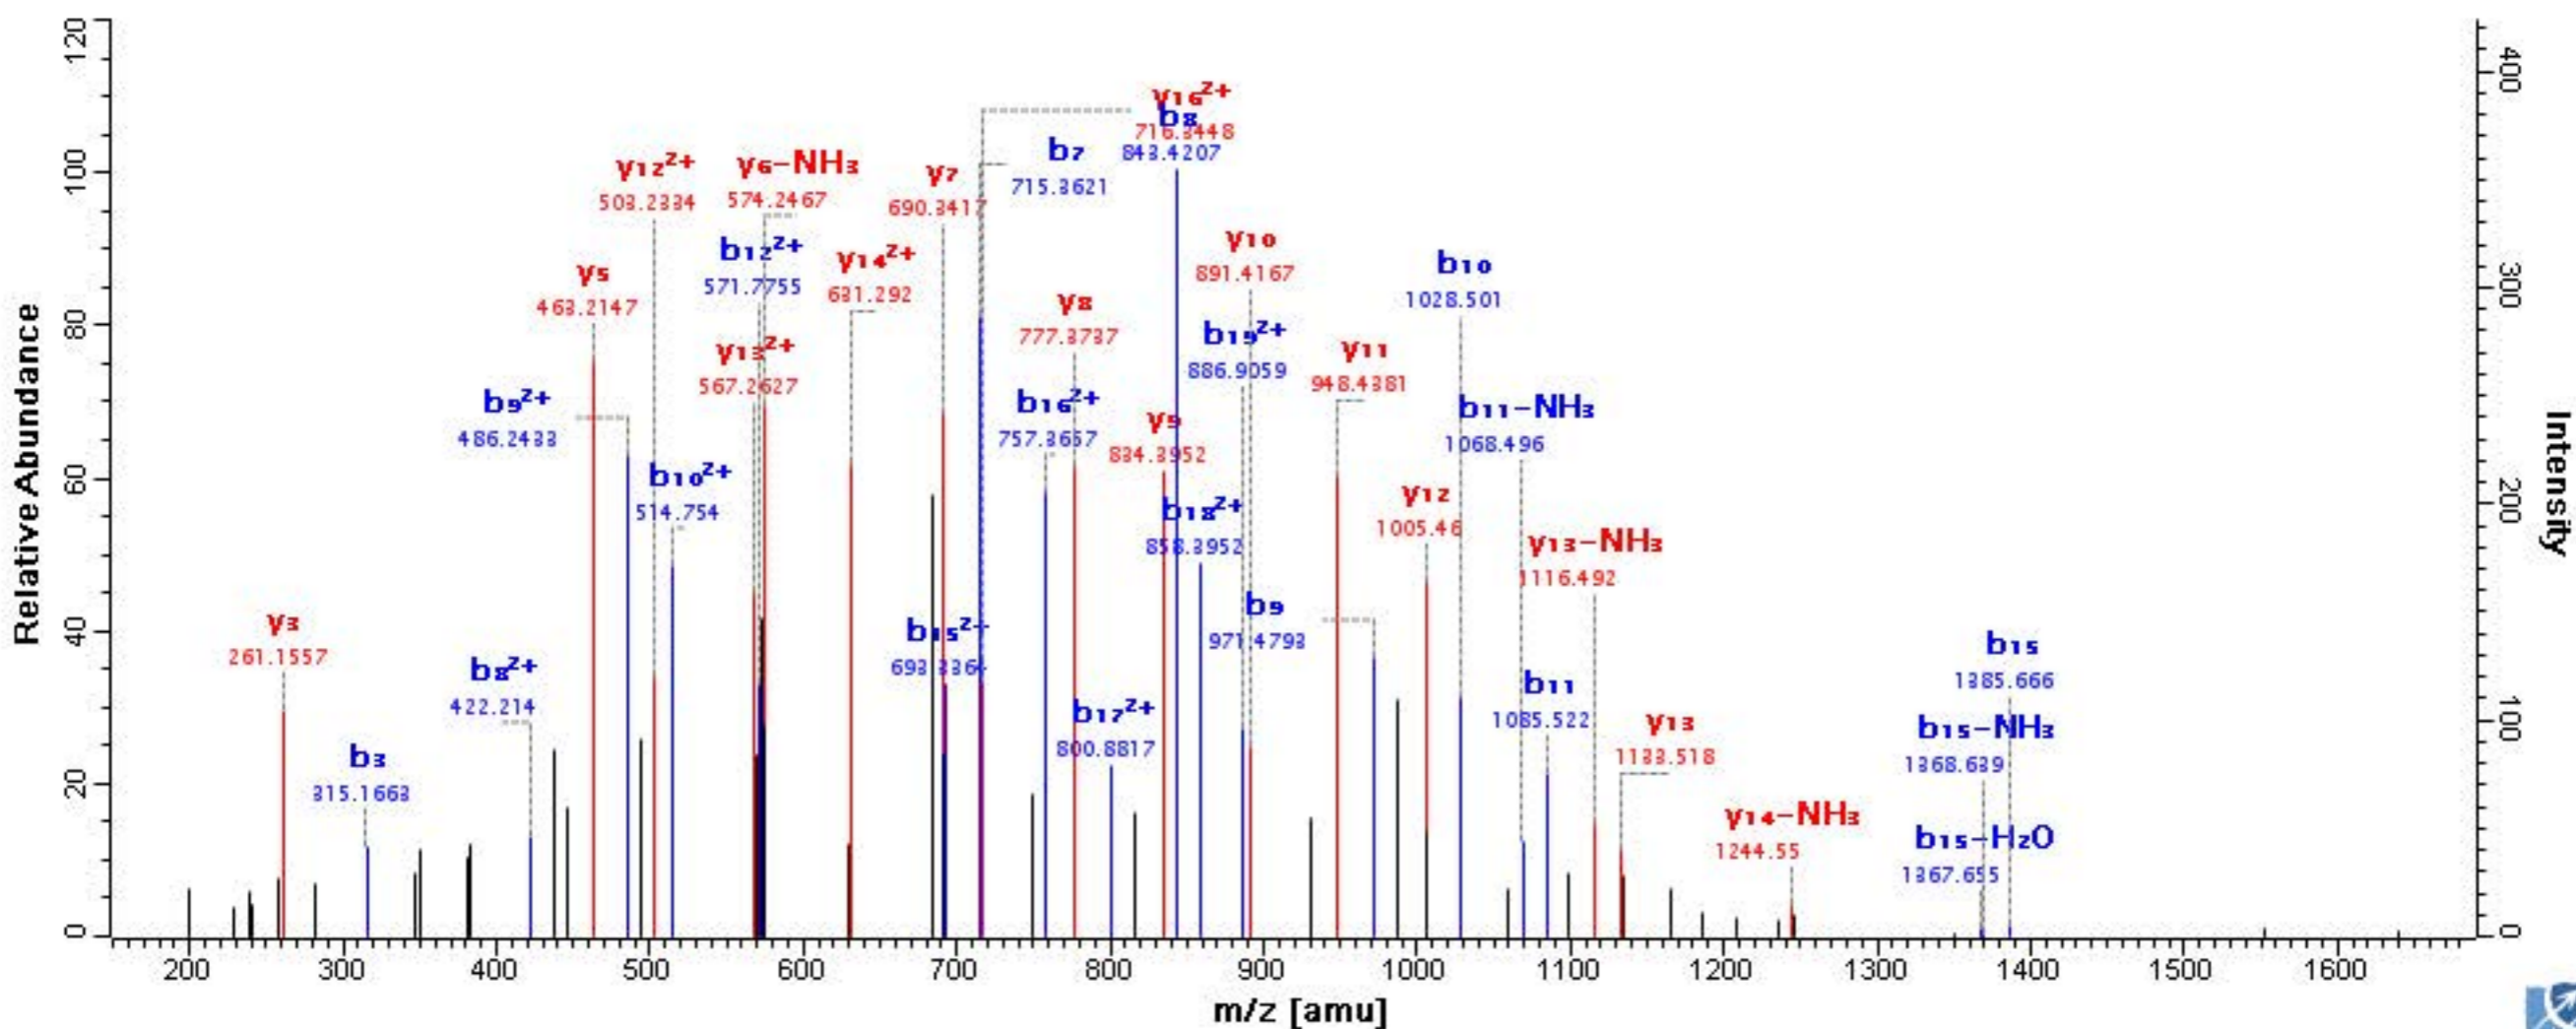

**precursor information**

|                   |                     |
|-------------------|---------------------|
| Mass:             | 1974.92393          |
| m/z:              | System.Collections. |
| Charge:           | System.Collections. |
| Retentiontime:    | System.Collections. |
| Score:            | 190.2405            |
| Mass Error [ppm]: | -0.1769             |
| PEP:              | 6.4704E-65          |
| Precursor Type:   | MULTI               |

| b <sup>2+</sup> ion |          | b ion     |          |    |     |    | γ ion    |           | γ <sup>2+</sup> ion |           |
|---------------------|----------|-----------|----------|----|-----|----|----------|-----------|---------------------|-----------|
| Δ dalton            | mass     | Δ dalton  | mass     |    | seq |    | Δ dalton | mass      | Δ dalton            | mass      |
|                     | 129.1022 |           | 129.1022 | 1  | K   | 20 |          |           |                     |           |
|                     | 186.1237 |           | 186.1237 | 2  | G   | 19 | 1847.837 |           | 1847.837            |           |
|                     | 315.1663 | +0.193689 | 315.1663 | 3  | E   | 18 | 1790.815 |           | 1790.815            |           |
|                     | 444.2089 |           | 444.2089 | 4  | E   | 17 | 1661.773 |           | 1661.773            |           |
|                     | 545.2566 |           | 545.2566 | 5  | T   | 16 | 1532.73  |           | 1532.73             |           |
|                     | 616.2937 |           | 616.2937 | 6  | A   | 15 | 1431.682 |           | 716.3448            | +0.155109 |
|                     | 715.3621 | -0.004491 | 715.3621 | 7  | V   | 14 | 1360.645 |           | 1360.645            |           |
| +0.102248           | 422.214  | -0.04134  | 843.4207 | 8  | Q   | 13 | 1261.577 |           | 631.292             | +0.170581 |
| +0.09835            | 486.2433 | +0.007016 | 971.4793 | 9  | Q   | 12 | 1133.518 | -0.040982 | 567.2627            | +0.076823 |
| +0.193514           | 514.754  | +0.049457 | 1028.501 | 10 | G   | 11 | 1005.46  | +0.191789 | 503.2334            | +0.129793 |
|                     | 1085.522 | +0.044472 | 1085.522 | 11 | G   | 10 | 948.4381 | -0.040958 | 948.4381            |           |
| +0.253227           | 571.7755 |           | 1142.544 | 12 | G   | 9  | 891.4167 | -0.084436 | 891.4167            |           |
|                     | 1199.565 |           | 1199.565 | 13 | G   | 8  | 834.3952 | +0.036759 | 834.3952            |           |
|                     | 1286.597 |           | 1286.597 | 14 | S   | 7  | 777.3737 | +0.146175 | 777.3737            |           |
| +0.106764           | 693.3364 | +0.23289  | 1385.666 | 15 | V   | 6  | 690.3417 | -0.053425 | 690.3417            |           |
| +0.144675           | 757.3657 |           | 1513.724 | 16 | Q   | 5  | 591.2733 |           | 591.2733            |           |
| +0.092345           | 800.8817 |           | 1600.756 | 17 | S   | 4  | 463.2147 | +0.104145 | 463.2147            |           |
| +0.367692           | 858.3952 |           | 1715.783 | 18 | D   | 3  | 376.1827 |           | 376.1827            |           |
| +0.235012           | 886.9059 |           | 1772.805 | 19 | G   | 2  | 261.1557 | +0.014099 | 261.1557            |           |
|                     | 1829.826 |           | 1829.826 | 20 | G   | 1  | 204.1343 |           | 204.1343            |           |
|                     |          |           |          | 21 | K   | 0  | 147.1128 |           | 147.1128            |           |

**general information**

|                       |             |
|-----------------------|-------------|
| Annotation:           | 15 of 21    |
| AminoAcids Coverag    | 71 %        |
| Intensity Coverage:   | 74 %        |
| Protein Localisation: | 120 ... 140 |

Source: 20120601\_VR\_Bsu\_TripleSILAC\_pWTPPrkCPrpC\_F06  
 Scannumber: 11449  
 Protein: BSU23460; spoliAB  
 Peptide Score: 132.51  
 Method: ITMS; CID; 3

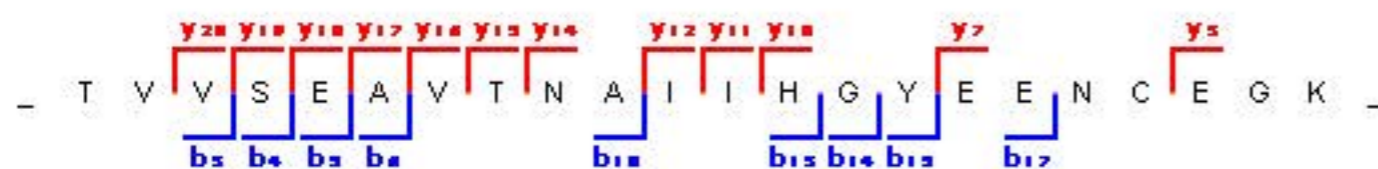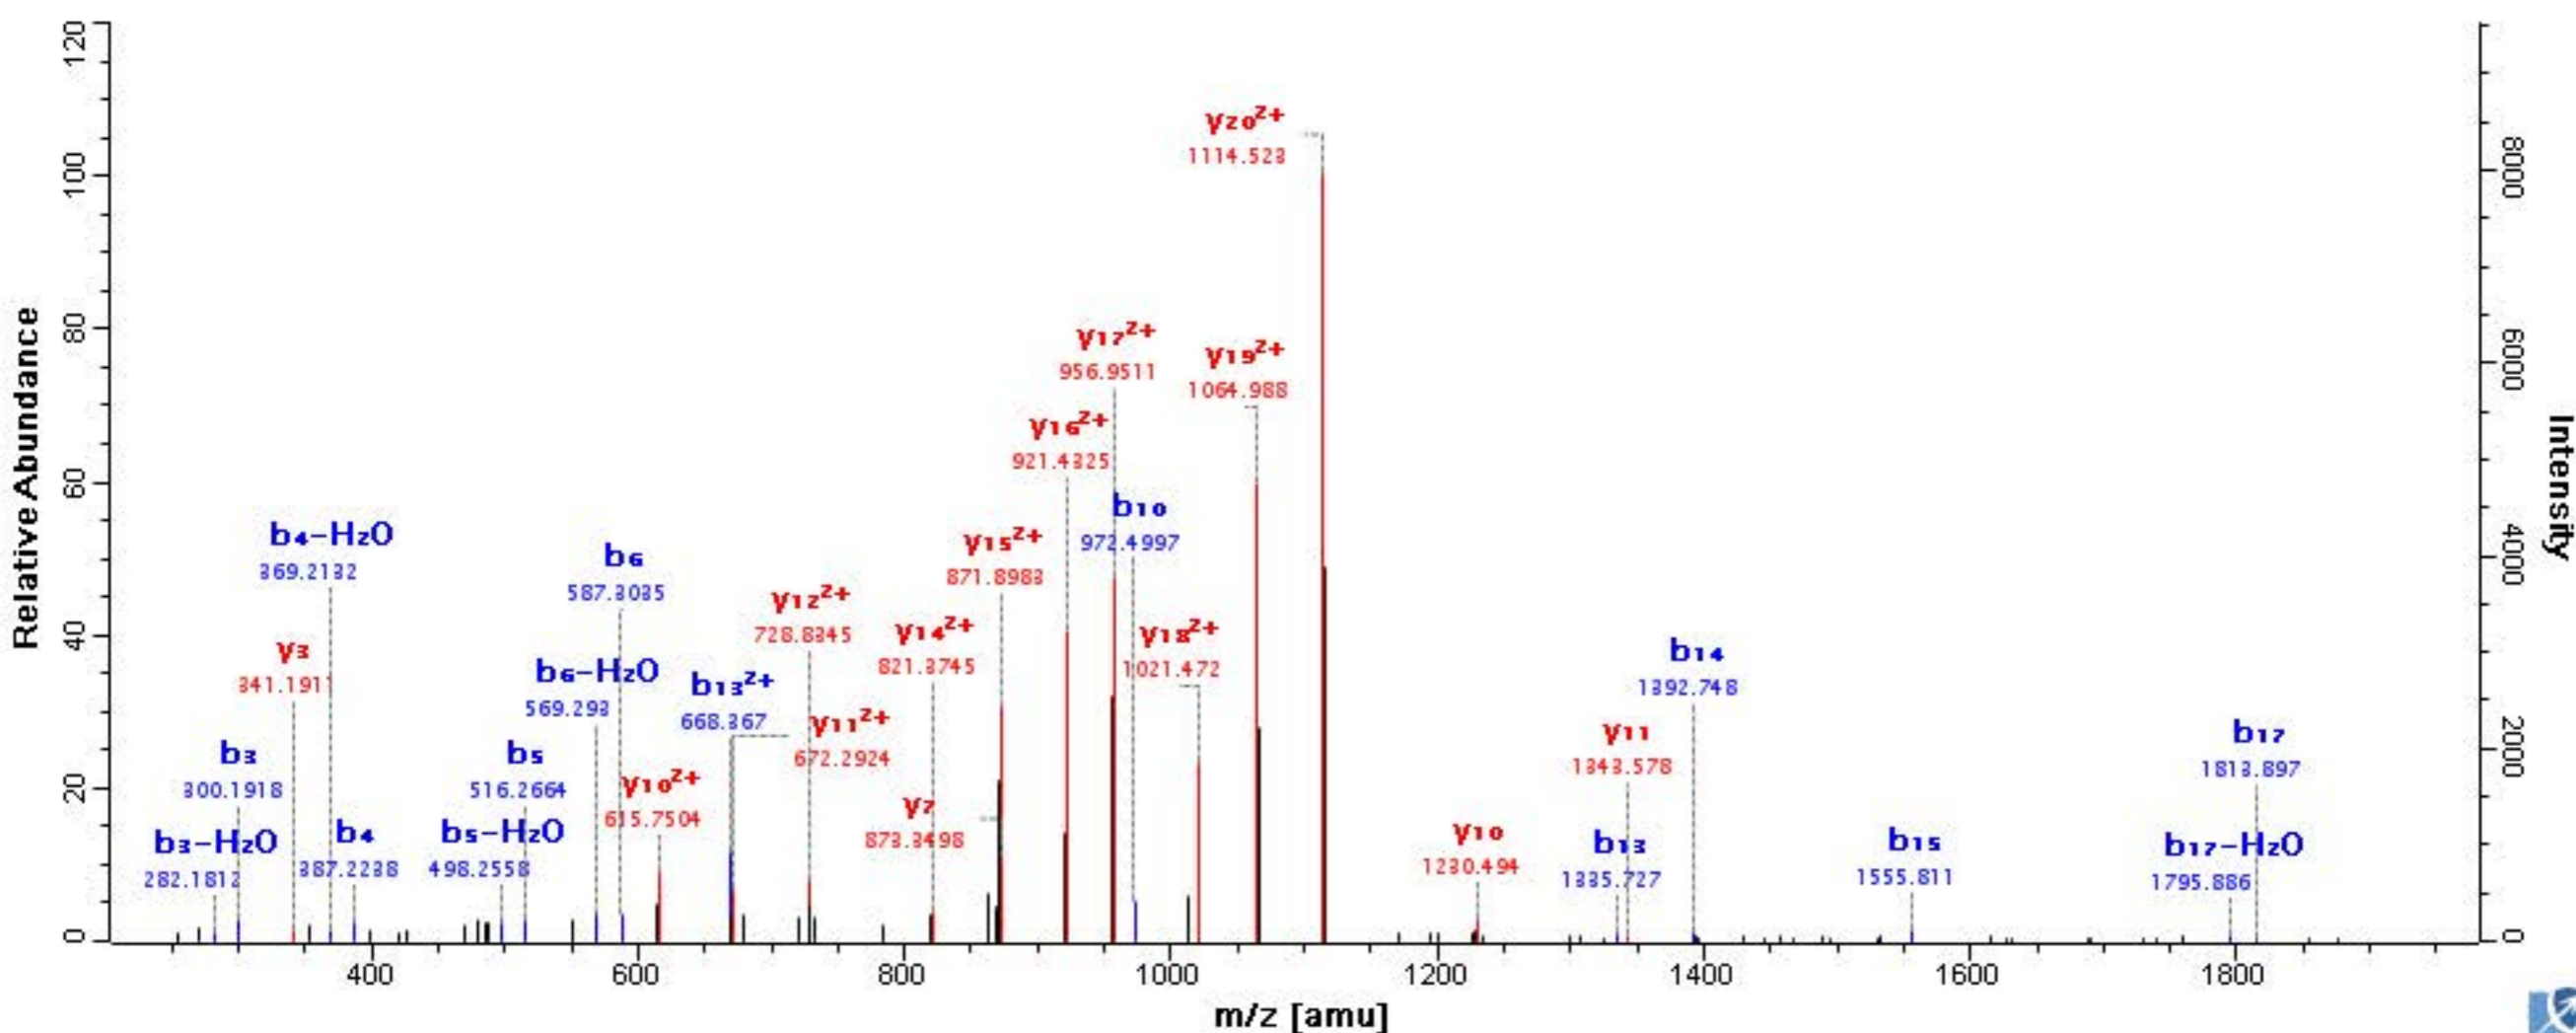

#### precursor information

|                   |                     |
|-------------------|---------------------|
| Mass:             | 2419.13246          |
| m/z:              | System.Collections. |
| Charge:           | System.Collections. |
| Retentiontime:    | System.Collections. |
| Score:            | 132.5055            |
| Mass Error [ppm]: | -0.040367           |
| PEP:              | 6.7431E-25          |
| Precursor Type:   | MULTI               |

| b <sup>2+</sup> ion |          | b ion     |          | seq |   | γ ion    |          | γ <sup>2+</sup> ion |           |
|---------------------|----------|-----------|----------|-----|---|----------|----------|---------------------|-----------|
| Δ dalton            | mass     | Δ dalton  | mass     |     |   | Δ dalton | mass     | Δ dalton            | mass      |
|                     | 102.055  |           | 102.055  | 1   | T | 21       |          |                     |           |
|                     | 201.1234 |           | 201.1234 | 2   | V | 20       | 2327.106 | 2327.106            |           |
|                     | 300.1918 | -0.034739 | 300.1918 | 3   | V | 19       | 2228.038 | 1114.523            | +0.034156 |
|                     | 387.2238 | +0.154729 | 387.2238 | 4   | S | 18       | 2128.97  | 1064.988            | -0.071407 |
|                     | 516.2664 | -0.043565 | 516.2664 | 5   | E | 17       | 2041.937 | 1021.472            | +0.355984 |
|                     | 587.3035 | +0.097056 | 587.3035 | 6   | A | 16       | 1912.895 | 956.9511            | +0.208518 |
|                     | 686.3719 |           | 686.3719 | 7   | V | 15       | 1841.858 | 921.4325            | +0.185205 |
|                     | 787.4196 |           | 787.4196 | 8   | T | 14       | 1742.789 | 871.8983            | -0.05073  |
|                     | 901.4625 |           | 901.4625 | 9   | N | 13       | 1641.742 | 821.3745            | +0.00027  |
|                     | 972.4997 | +0.045575 | 972.4997 | 10  | A | 12       | 1527.699 | 1527.699            |           |
|                     | 1085.584 |           | 1085.584 | 11  | I | 11       | 1456.662 | 728.8345            | +0.052925 |
|                     | 1198.668 |           | 1198.668 | 12  | I | 10       | 1343.578 | 672.2924            | -0.163649 |
| +0.091573           | 668.367  | +0.011101 | 1335.727 | 13  | H | 9        | 1230.494 | 615.7504            | -0.131993 |
|                     | 1392.748 | +0.014662 | 1392.748 | 14  | G | 8        | 1093.435 | 1093.435            |           |
|                     | 1555.811 | +0.478677 | 1555.811 | 15  | Y | 7        | 1036.413 | 1036.413            |           |
|                     | 1684.854 |           | 1684.854 | 16  | E | 6        | 873.3498 | 873.3498            | +0.057893 |
|                     | 1813.897 | +0.057554 | 1813.897 | 17  | E | 5        | 744.3072 | 744.3072            |           |
|                     | 1927.94  |           | 1927.94  | 18  | N | 4        | 615.2646 | 615.2646            |           |
|                     | 2087.97  |           | 2087.97  | 19  | C | 3        | 501.2217 | 501.2217            |           |
|                     | 2217.013 |           | 2217.013 | 20  | E | 2        | 341.1911 | 341.1911            | +0.158183 |
|                     | 2274.034 |           | 2274.034 | 21  | G | 1        | 212.1485 | 212.1485            |           |
|                     |          |           |          | 22  | K | 0        | 155.127  | 155.127             |           |

#### general information

|                       |           |
|-----------------------|-----------|
| Annotation:           | 17 of 22  |
| AminoAcids Coverag    | 77 %      |
| Intensity Coverage:   | 53 %      |
| Protein Localisation: | 42 ... 63 |

Source: 20120601\_VR\_Bsu\_TripleSILAC\_pWTPPrkCPrpC\_F06  
 Scannumber: 5708  
 Protein: BSU27630; yrvD  
 Peptide Score: 140.46  
 Method: ITMS; CID; 3

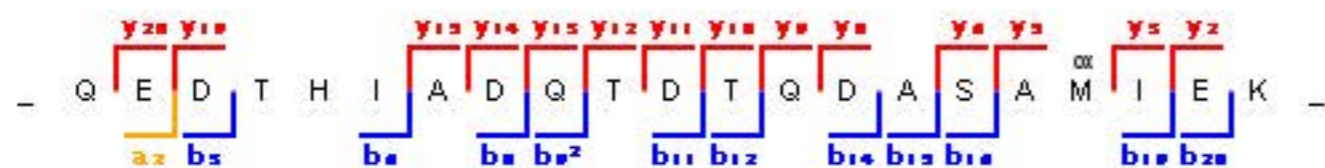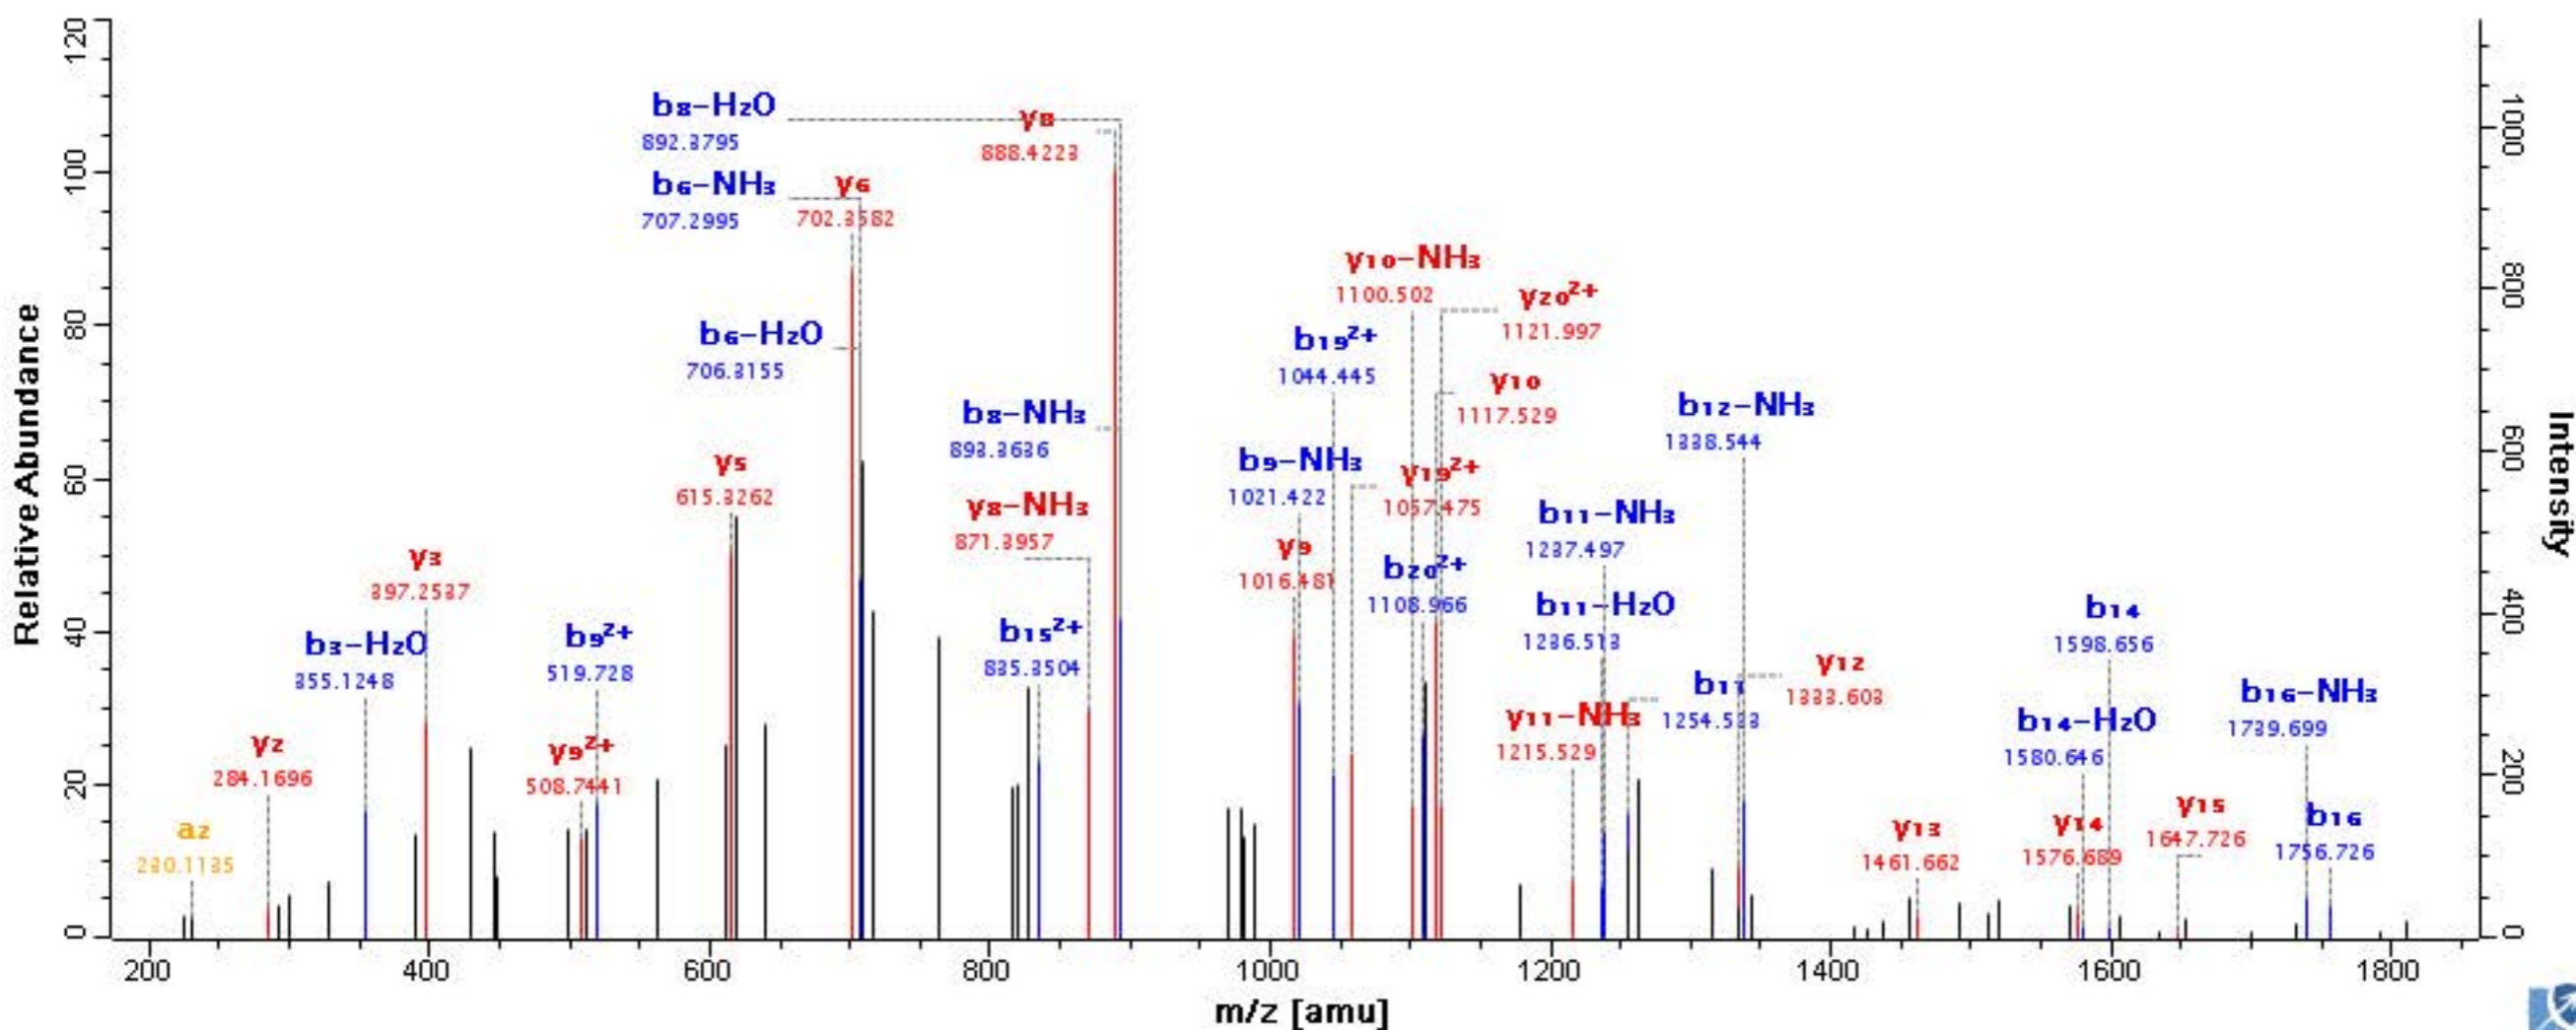

#### precursor information

|                   |                     |
|-------------------|---------------------|
| Mass:             | 2362.02247          |
| m/z:              | System.Collections. |
| Charge:           | System.Collections. |
| Retentiontime:    | System.Collections. |
| Score:            | 140.4611            |
| Mass Error [ppm]: | -0.24978            |
| PEP:              | 5.6133E-25          |
| Precursor Type:   | MULTI               |

| a ion    |         | b <sup>2+</sup> ion |         | b ion    |         | seq |   | γ ion    |         | γ <sup>2+</sup> ion |         |
|----------|---------|---------------------|---------|----------|---------|-----|---|----------|---------|---------------------|---------|
| Δ dalton | mass    | Δ dalton            | mass    | Δ dalton | mass    |     |   | Δ dalton | mass    | Δ dalton            | mass    |
|          | 101.071 |                     | 129.066 |          | 129.066 | 1   | Q | 20       |         |                     |         |
| +0.08529 | 230.114 |                     | 258.108 |          | 258.108 | 2   | E | 19       | 2242.99 |                     | 1122    |
|          | 345.14  |                     | 373.135 |          | 373.135 | 3   | D | 18       | 2113.94 |                     | 1057.48 |
|          | 446.188 |                     | 474.183 |          | 474.183 | 4   | T | 17       | 1998.92 |                     | 1998.92 |
|          | 583.247 |                     | 611.242 |          | 611.242 | 5   | H | 16       | 1897.87 |                     | 1897.87 |
|          | 696.331 |                     | 724.326 |          | 724.326 | 6   | I | 15       | 1760.81 |                     | 1760.81 |
|          | 767.368 |                     | 795.363 |          | 795.363 | 7   | A | 14       | 1647.73 | +0.22894            | 1647.73 |
|          | 882.395 |                     | 910.39  |          | 910.39  | 8   | D | 13       | 1576.69 | +0.29596            | 1576.69 |
|          | 1010.45 | +0.29644            | 519.728 |          | 1038.45 | 9   | Q | 12       | 1461.66 | -0.3156             | 1461.66 |
|          | 1111.5  |                     | 1139.5  |          | 1139.5  | 10  | T | 11       | 1333.6  | -0.0779             | 1333.6  |
|          | 1226.53 |                     | 1254.52 | +0.01295 | 1254.52 | 11  | D | 10       | 1232.56 |                     | 1232.56 |
|          | 1327.58 |                     | 1355.57 |          | 1355.57 | 12  | T | 9        | 1117.53 | +0.12835            | 1117.53 |
|          | 1455.63 |                     | 1483.63 |          | 1483.63 | 13  | Q | 8        | 1016.48 | -0.0063             | 508.744 |
|          | 1570.66 |                     | 1598.66 | +0.10498 | 1598.66 | 14  | D | 7        | 888.422 | +0.05412            | 888.422 |
|          | 1641.7  | +0.12105            | 583.35  |          | 1669.69 | 15  | A | 6        | 773.395 |                     | 773.395 |
|          | 1728.73 |                     | 1756.73 | -0.2673  | 1756.73 | 16  | S | 5        | 702.358 | +0.00612            | 702.358 |
|          | 1799.77 |                     | 1827.76 |          | 1827.76 | 17  | A | 4        | 615.326 | +0.06695            | 615.326 |
|          | 1946.8  |                     | 1974.8  |          | 1974.8  | 18  | M | 3        | 544.289 |                     | 544.289 |
|          | 2059.89 | +0.10017            | 1044.44 |          | 2087.88 | 19  | I | 2        | 397.254 | +0.00202            | 397.254 |
|          | 2188.93 | +0.12136            | 1108.97 |          | 2216.92 | 20  | E | 1        | 284.17  | +0.01745            | 284.17  |
|          |         |                     |         |          |         | 21  | K | 0        | 155.127 |                     | 155.127 |

#### general information

|                       |            |
|-----------------------|------------|
| Annotation:           | 16 of 21   |
| AminoAcids Coverage:  | 76 %       |
| Intensity Coverage:   | 54 %       |
| Protein Localisation: | 85 ... 105 |

Source: 20120601\_VR\_Bsu\_TripleSILAC\_pWTPPrkCPrpC\_F06  
 Scannumber: 5976  
 Protein: BSU11900; yjcL  
 Peptide Score: 105.65  
 Method: ITMS; CID; 3

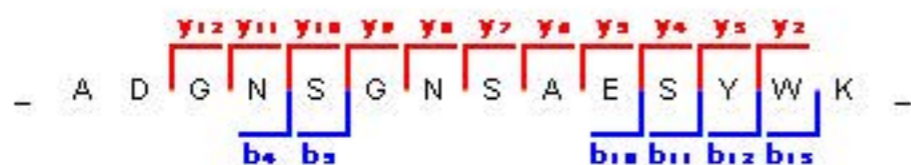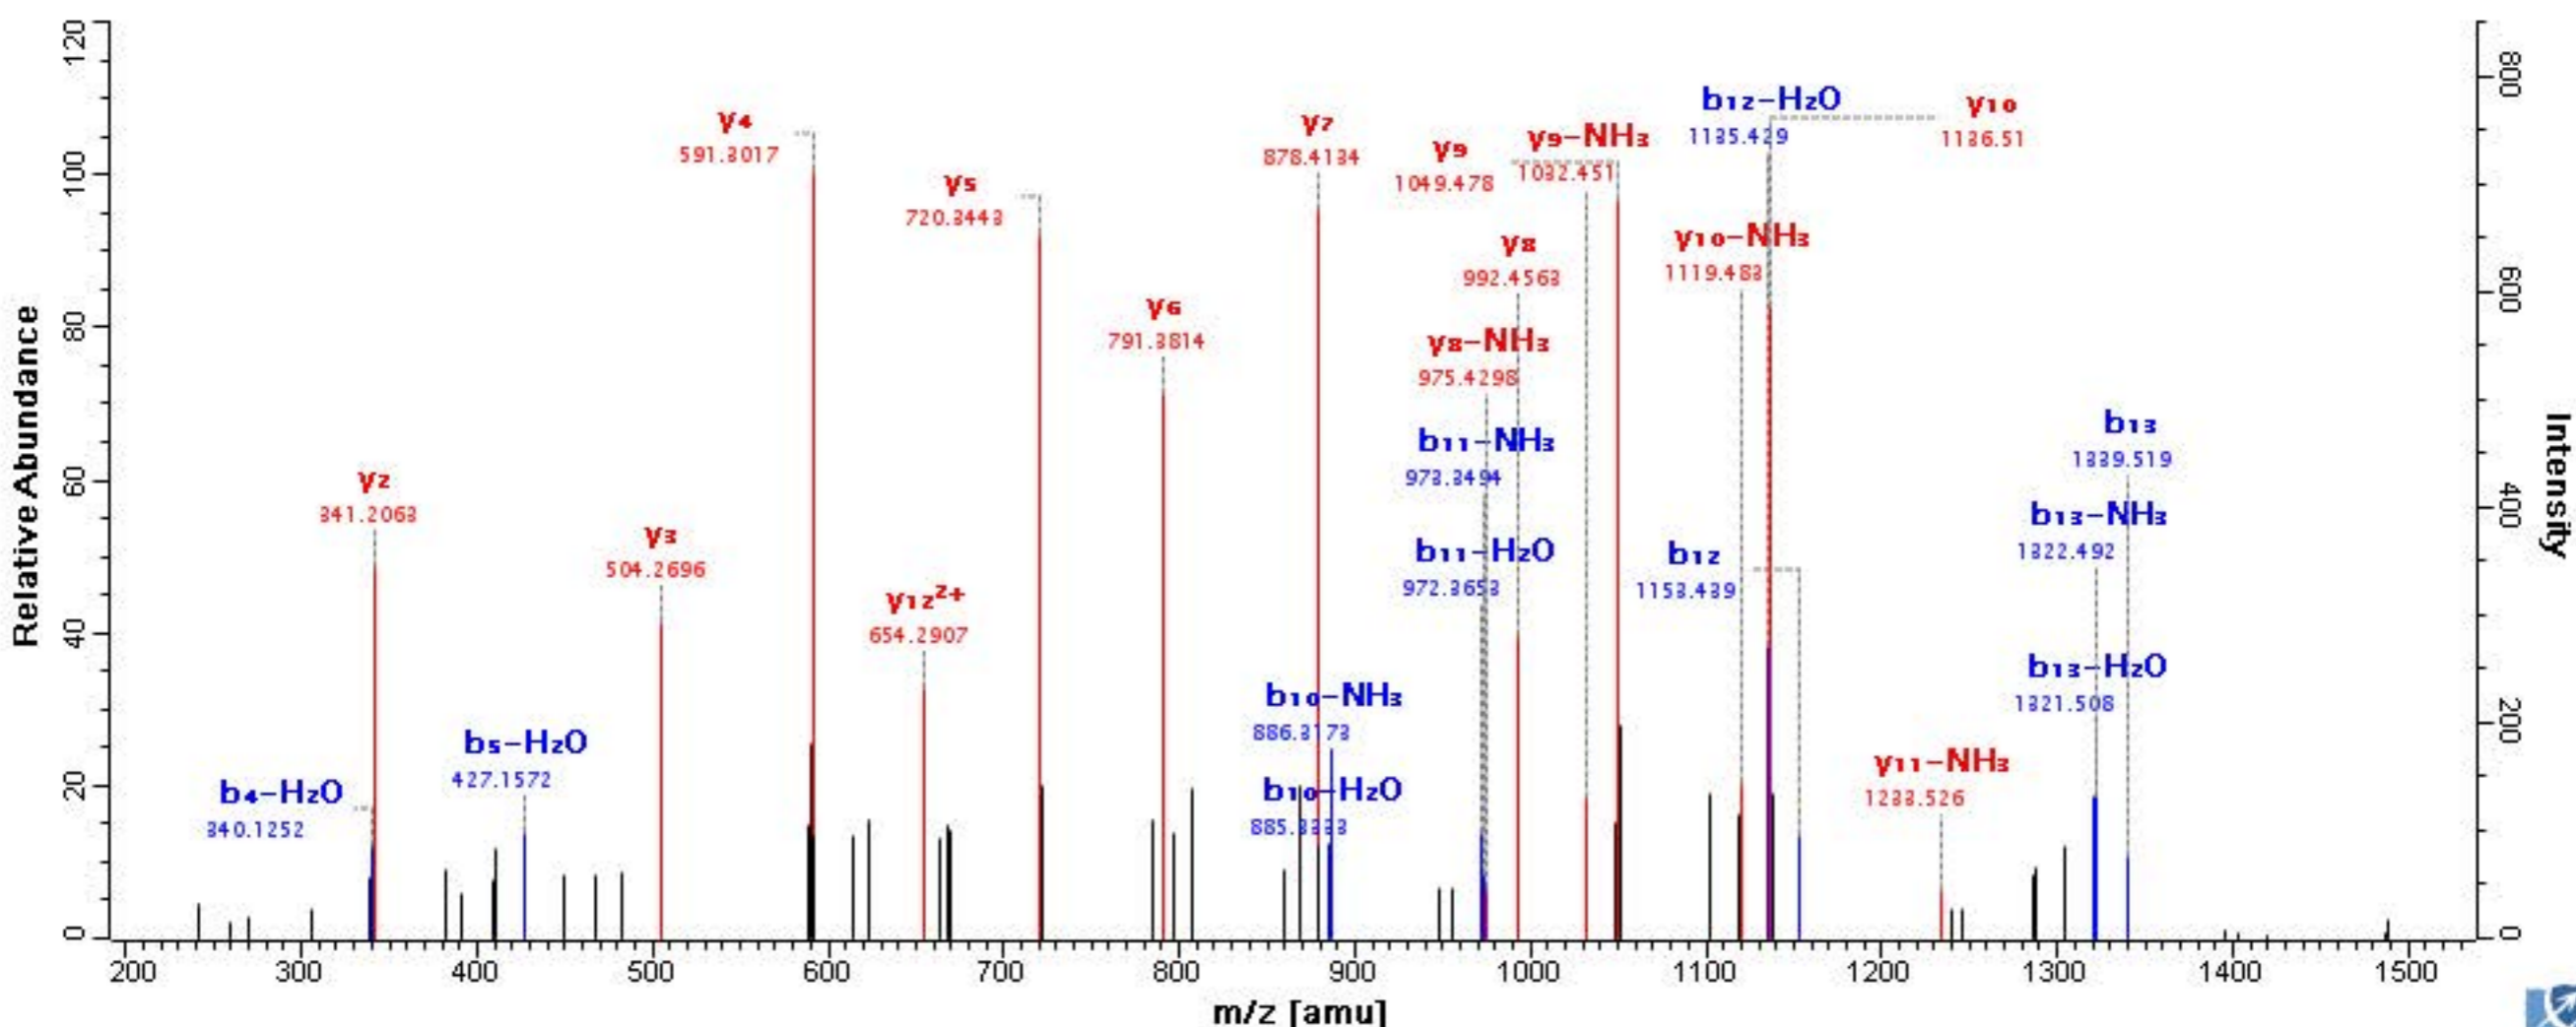

#### precursor information

|                   |                     |
|-------------------|---------------------|
| Mass:             | 1484.61639          |
| m/z:              | System.Collections. |
| Charge:           | System.Collections. |
| Retentiontime:    | System.Collections. |
| Score:            | 105.649             |
| Mass Error [ppm]: | -0.27384            |
| PEP:              | 7.0117E-07          |
| Precursor Type:   | MULTI               |

#### general information

|                       |             |
|-----------------------|-------------|
| Annotation:           | 11 of 14    |
| AminoAcids Coverage:  | 79 %        |
| Intensity Coverage:   | 64 %        |
| Protein Localisation: | 196 ... 209 |

| b ion      |              |    |     |    | gamma ion    |            |              | gamma <sup>2+</sup> ion |  |
|------------|--------------|----|-----|----|--------------|------------|--------------|-------------------------|--|
| Δ dalton   | mass         |    | seq |    | Δ dalton     | mass       | Δ dalton     | mass                    |  |
|            | 72.044390254 | 1  | A   | 13 |              |            |              |                         |  |
|            | 187.07133329 | 2  | D   | 12 | 1422.601162  |            | 1422.601162  |                         |  |
|            | 244.09279701 | 3  | G   | 11 | 1307.5742189 |            | 654.2907477  | +0.2217645              |  |
|            | 358.13572446 | 4  | N   | 10 | 1250.5527552 |            | 1250.5527552 |                         |  |
|            | 445.16775287 | 5  | S   | 9  | 1136.5098278 | +0.0087269 | 1136.5098278 |                         |  |
|            | 502.18921659 | 6  | G   | 8  | 1049.4777994 | +0.050521  | 1049.4777994 |                         |  |
|            | 616.23214404 | 7  | N   | 7  | 992.45633563 | -0.0649782 | 992.45633563 |                         |  |
|            | 703.26417245 | 8  | S   | 6  | 878.41340818 | -1.71E-05  | 878.41340818 |                         |  |
|            | 774.30128624 | 9  | A   | 5  | 791.38137977 | -0.0077836 | 791.38137977 |                         |  |
|            | 903.34387933 | 10 | E   | 4  | 720.34426598 | +0.1133146 | 720.34426598 |                         |  |
|            | 990.37590774 | 11 | S   | 3  | 591.30167289 | +0.061059  | 591.30167289 |                         |  |
| -0.0229765 | 1153.4392363 | 12 | Y   | 2  | 504.26964448 | +0.066171  | 504.26964448 |                         |  |
| +0.2298639 | 1339.5185492 | 13 | W   | 1  | 341.20631594 | +0.0616284 | 341.20631594 |                         |  |
|            |              | 14 | K   | 0  | 155.12700298 |            | 155.12700298 |                         |  |



Source: 201 20601\_VR\_Bsu\_TripleSILAC\_pWTPPrkCPrpC\_F08  
 Scannumber: 3486  
 Protein: BSU18030; tlp; tlpA  
 Peptide Score: 76.85  
 Method: ITMS; CID; 3

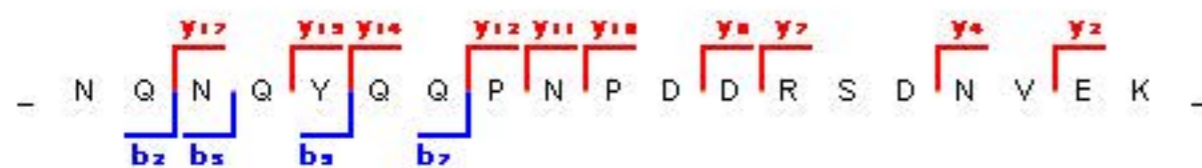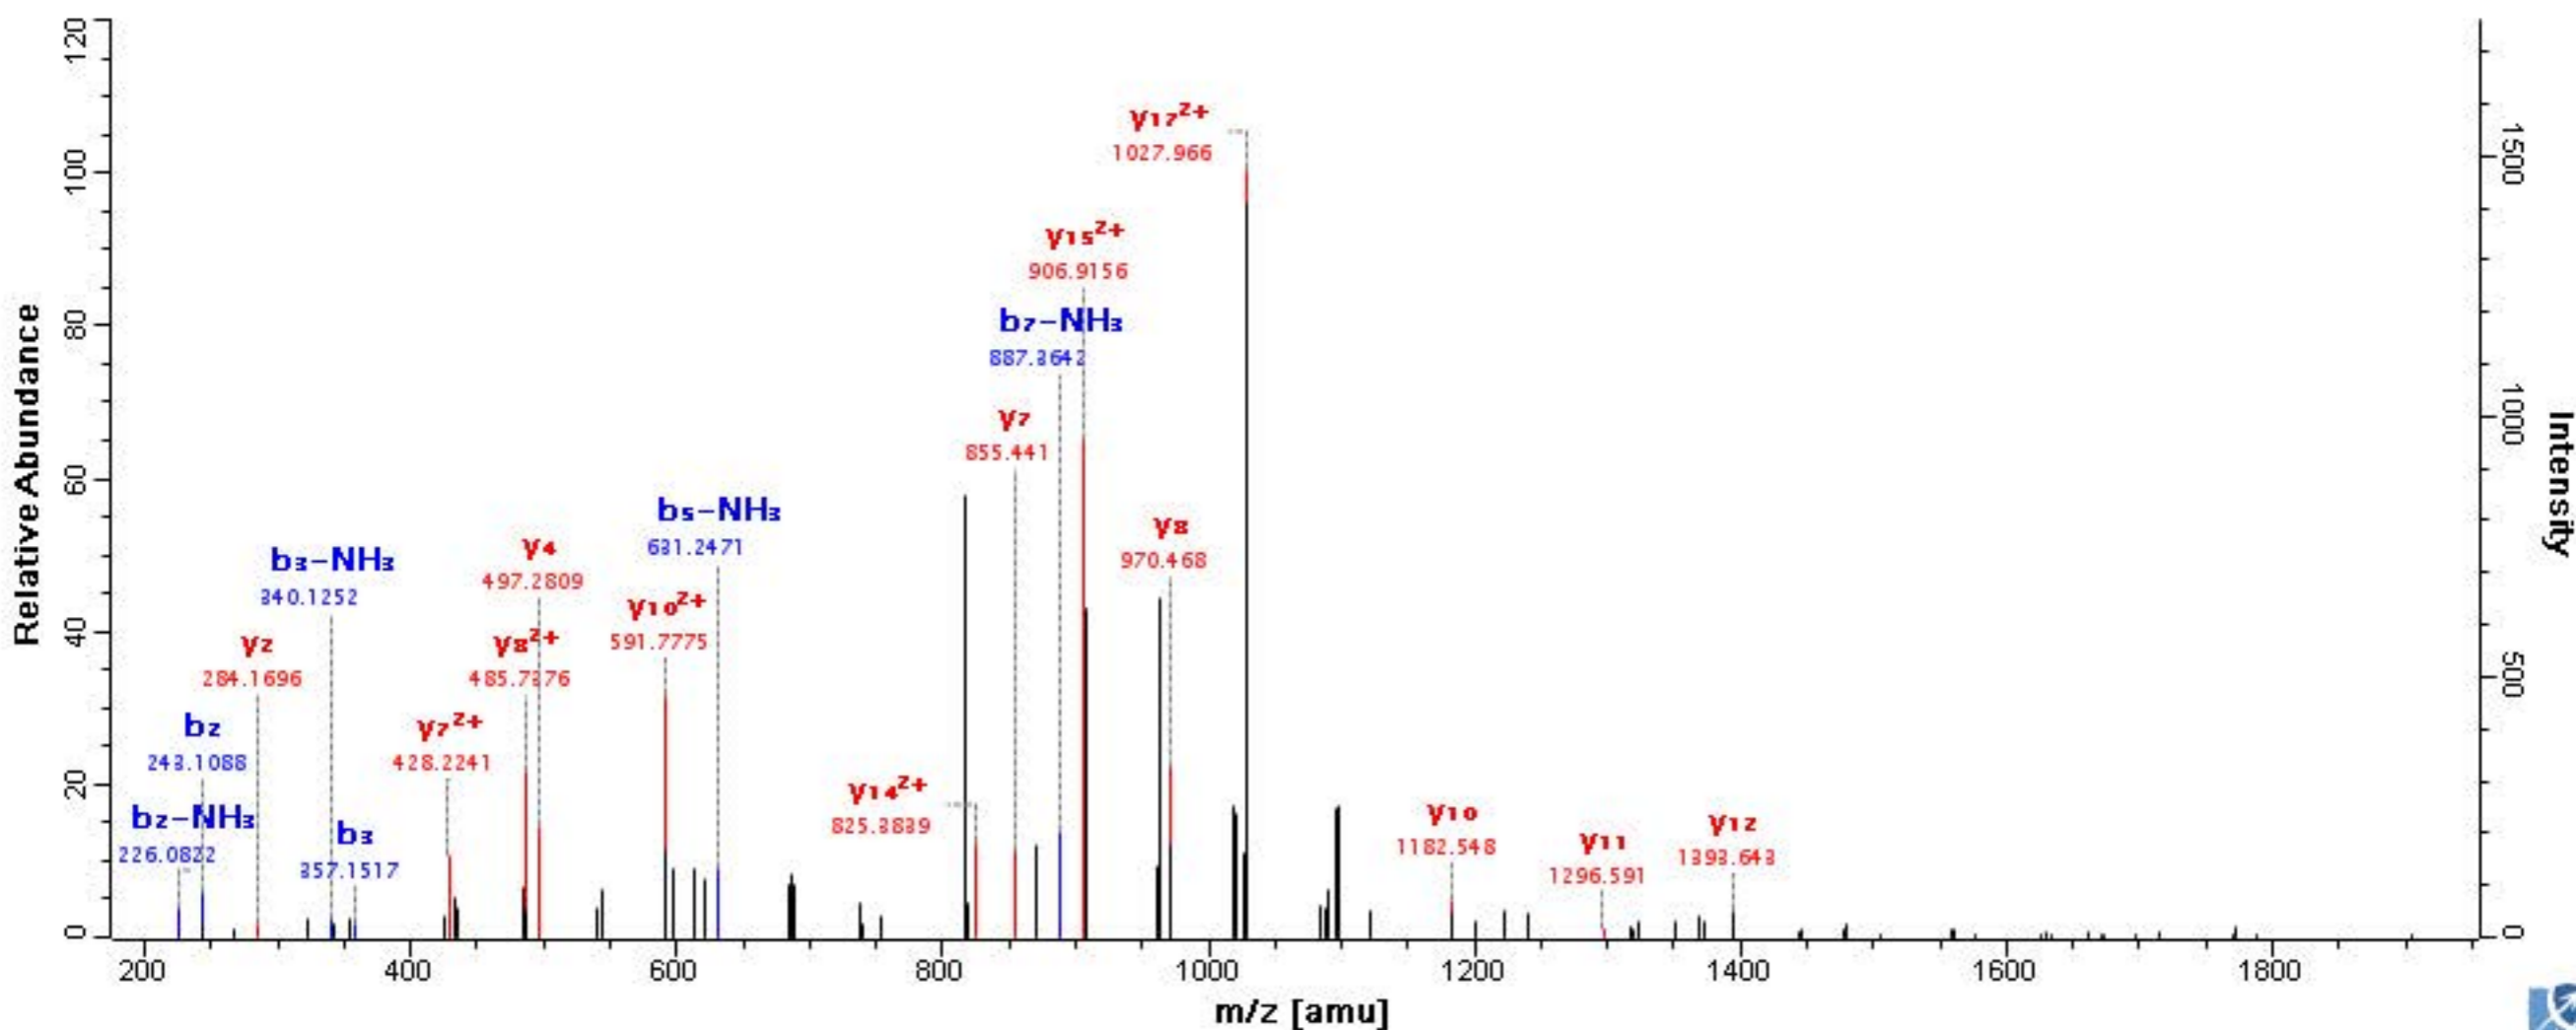

#### precursor information

|                   |                     |
|-------------------|---------------------|
| Mass:             | 2288.00437          |
| m/z:              | System.Collections. |
| Charge:           | System.Collections. |
| Retentiontime:    | System.Collections. |
| Score:            | 76.85023            |
| Mass Error [ppm]: | -0.44142            |
| PEP:              | 8.7053E-05          |
| Precursor Type:   | MULTI               |

| b ion      |              |    |     |    | y ion        |            | y <sup>2+</sup> ion |            |
|------------|--------------|----|-----|----|--------------|------------|---------------------|------------|
| Δ dalton   | mass         |    | seq |    | Δ dalton     | mass       | Δ dalton            | mass       |
|            | 115.05020391 | 1  | N   | 18 |              |            |                     |            |
| +0.1013931 | 243.10878143 | 2  | Q   | 17 | 2182.9839272 |            | 2182.9839272        |            |
| -0.0102904 | 357.15170887 | 3  | N   | 16 | 2054.9253496 |            | 1027.9663131        | -0.0211226 |
|            | 485.21028638 | 4  | Q   | 15 | 1940.8824222 |            | 1940.8824222        |            |
|            | 648.27361492 | 5  | Y   | 14 | 1812.8238447 |            | 906.91556058        | +0.0165073 |
|            | 776.33219243 | 6  | Q   | 13 | 1649.7605162 |            | 825.38389631        | +0.2228542 |
|            | 904.39076994 | 7  | Q   | 12 | 1521.7019386 |            | 1521.7019386        |            |
|            | 1001.4435338 | 8  | P   | 11 | 1393.6433611 | +0.0396223 | 1393.6433611        |            |
|            | 1115.4864612 | 9  | N   | 10 | 1296.5905973 | +0.1834506 | 1296.5905973        |            |
|            | 1212.5392251 | 10 | P   | 9  | 1182.5476698 | +0.1607042 | 591.77747315        | +0.0256885 |
|            | 1327.5661681 | 11 | D   | 8  | 1085.494906  |            | 1085.494906         |            |
|            | 1442.5931112 | 12 | D   | 7  | 970.46796295 | +0.1683286 | 485.73761971        | -0.074961  |
|            | 1598.6942222 | 13 | R   | 6  | 855.44101991 | +0.0649615 | 428.22414819        | +0.1694675 |
|            | 1685.7262506 | 14 | S   | 5  | 699.33990889 |            | 699.33990889        |            |
|            | 1800.7531936 | 15 | D   | 4  | 612.30788048 |            | 612.30788048        |            |
|            | 1914.7961211 | 16 | N   | 3  | 497.28093744 | +0.0662305 | 497.28093744        |            |
|            | 2013.864535  | 17 | V   | 2  | 383.23801    |            | 383.23801           |            |
|            | 2142.9071281 | 18 | E   | 1  | 284.16959608 | -0.1323646 | 284.16959608        |            |
|            |              | 19 | K   | 0  | 155.12700298 |            | 155.12700298        |            |

#### general information

|                       |          |
|-----------------------|----------|
| Annotation:           | 13 of 19 |
| AminoAcids Coverag    | 68 %     |
| Intensity Coverage:   | 37 %     |
| Protein Localisation: | 4 ... 22 |

Source: 20120601\_VR\_Bsu\_TripleSILAC\_WTPPrkCPrpC\_GeLC\_FD1  
 Scannumber: 10599  
 Protein: BSU39960; S14IR; yxal  
 Peptide Score: 111.82  
 Method: ITMS; CID; 3

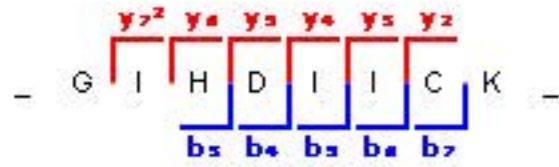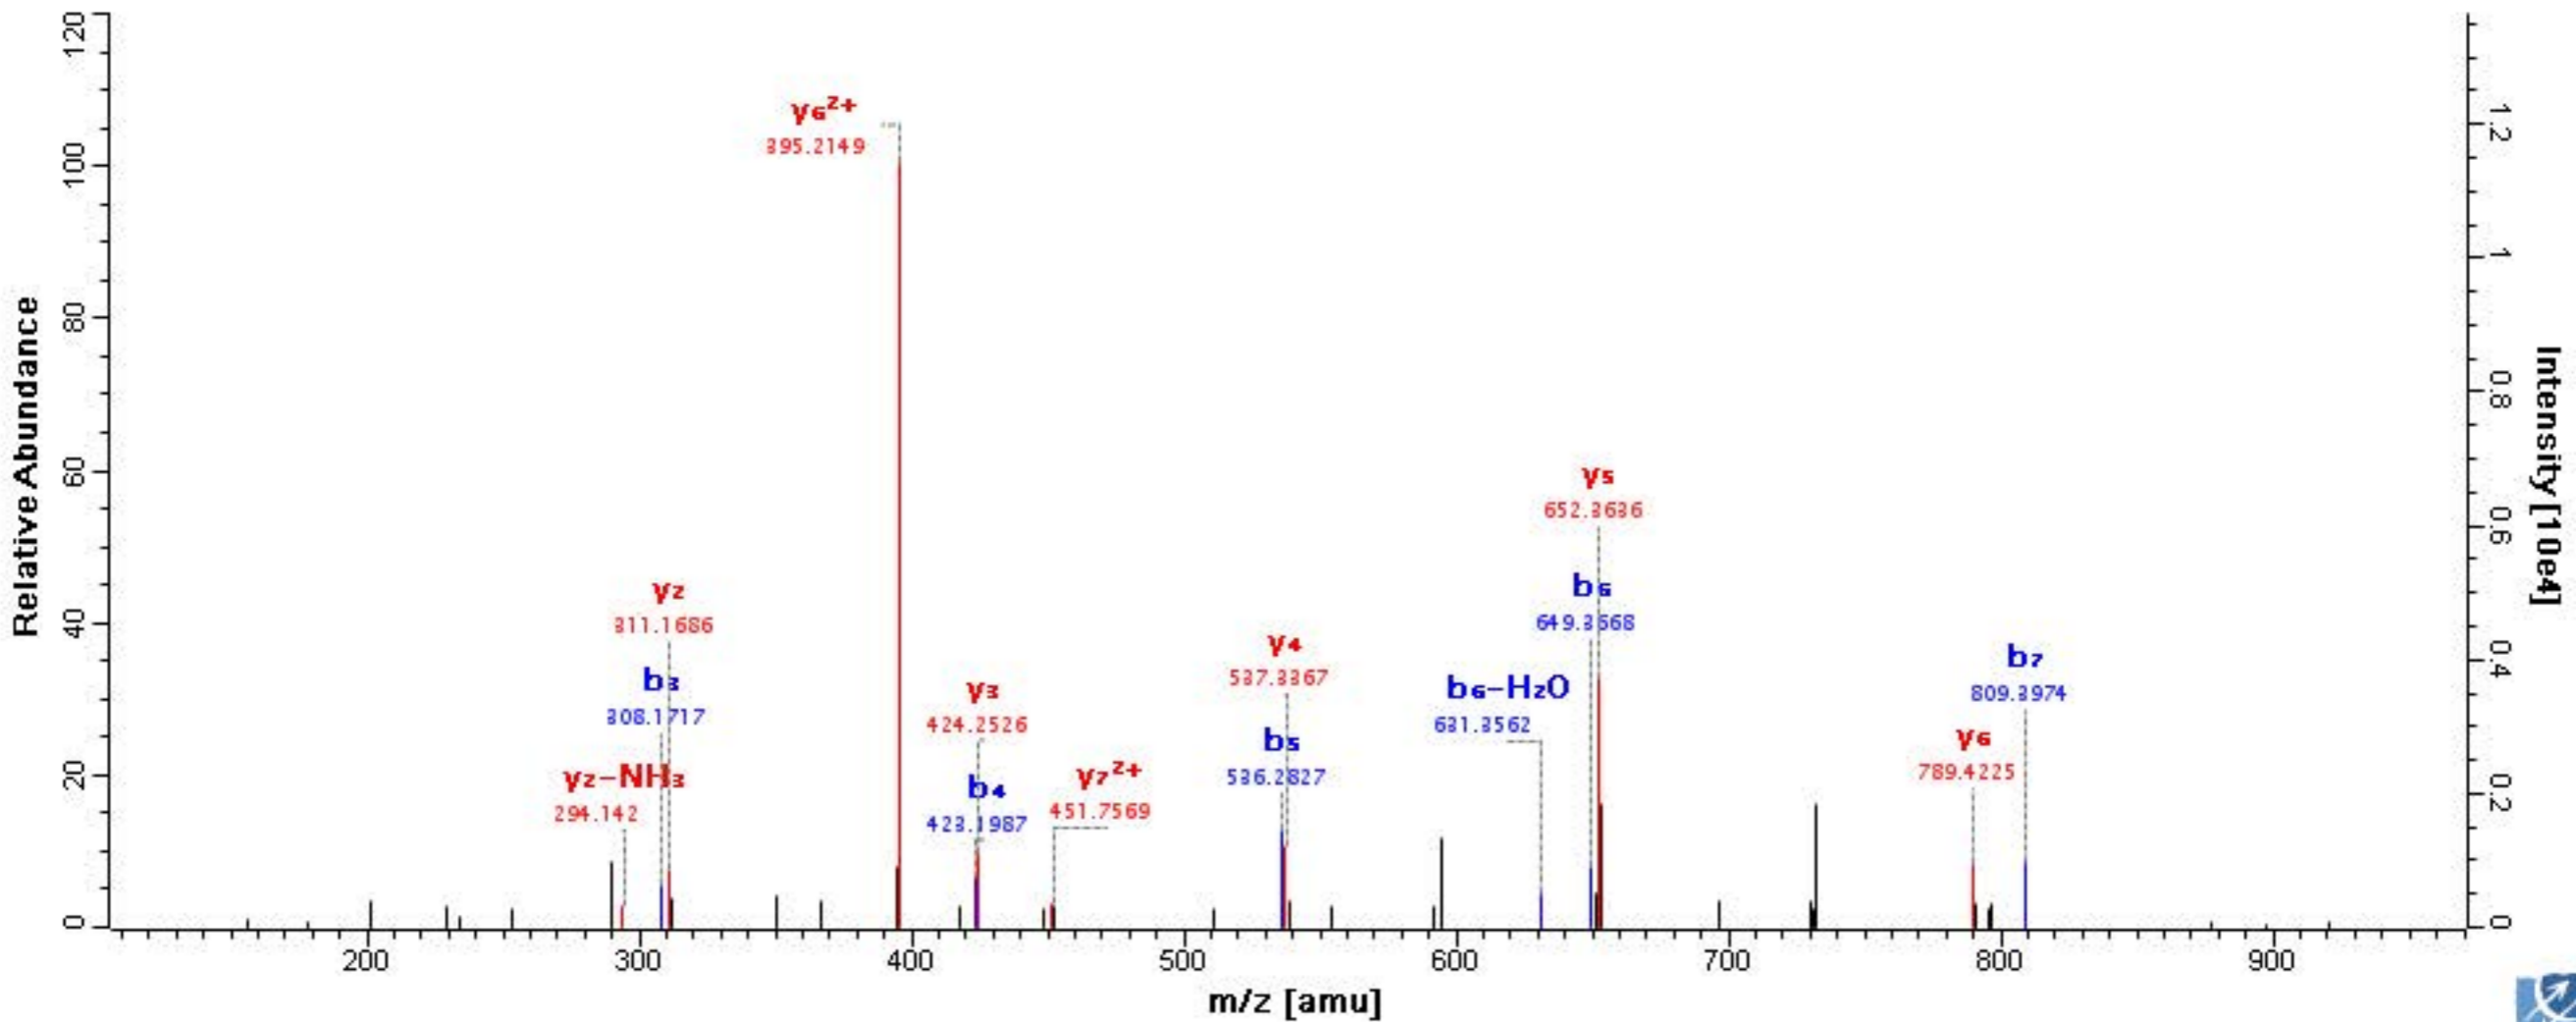

precursor information

|                       |                     |
|-----------------------|---------------------|
| Mass:                 | 954.49569           |
| m/z:                  | System.Collections. |
| Charge:               | System.Collections. |
| Retentiontime:        | System.Collections. |
| Score:                | 111.8157            |
| Mass Error [ppm]:     | 0.0062653           |
| g PEP:                | 0.0039394           |
| Annotation:           | 6 of 8              |
| AminoAcids Coverage:  | 75 %                |
| Intensity Coverage:   | 63 %                |
| Protein Localisation: | 138 ... 145         |

| b ion      |              |   |     |   | y ion        |            | y <sup>2+</sup> ion |            |
|------------|--------------|---|-----|---|--------------|------------|---------------------|------------|
| Δ dalton   | mass         |   | seq |   | Δ dalton     | mass       | Δ dalton            | mass       |
|            | 58.02874019  | 1 | G   | 7 |              |            |                     |            |
|            | 171.11280417 | 2 | I   | 6 | 902.50660619 |            | 451.75694133        | -0.2960649 |
| -0.0876706 | 308.17171603 | 3 | H   | 5 | 789.42254221 | +0.0447429 | 395.21490934        | +0.1750443 |
| -0.0035907 | 423.19865906 | 4 | D   | 4 | 652.36363035 | +0.0367603 | 652.36363035        |            |
| -0.0071493 | 536.28272305 | 5 | I   | 3 | 537.33668732 | -0.0401175 | 537.33668732        |            |
| -0.017788  | 649.36678703 | 6 | I   | 2 | 424.25262334 | -0.0447986 | 424.25262334        |            |
| -0.006383  | 809.39743523 | 7 | C   | 1 | 311.16855936 | +0.078572  | 311.16855936        |            |
|            |              | 8 | K   | 0 | 151.13791115 |            | 151.13791115        |            |

Source: 20120601\_VR\_Bsu\_TripleSILAC\_WTPPrkCPrpC\_GeLC\_F01  
 Scannumber: 11480  
 Protein: BSU02170; ybfB  
 Peptide Score: 95.27  
 Method: ITMS; CID; 3

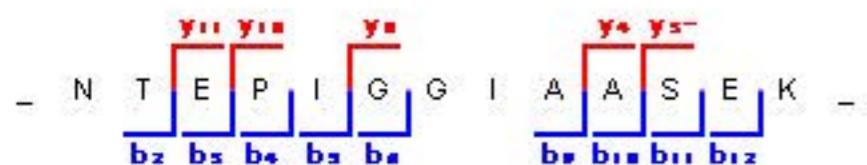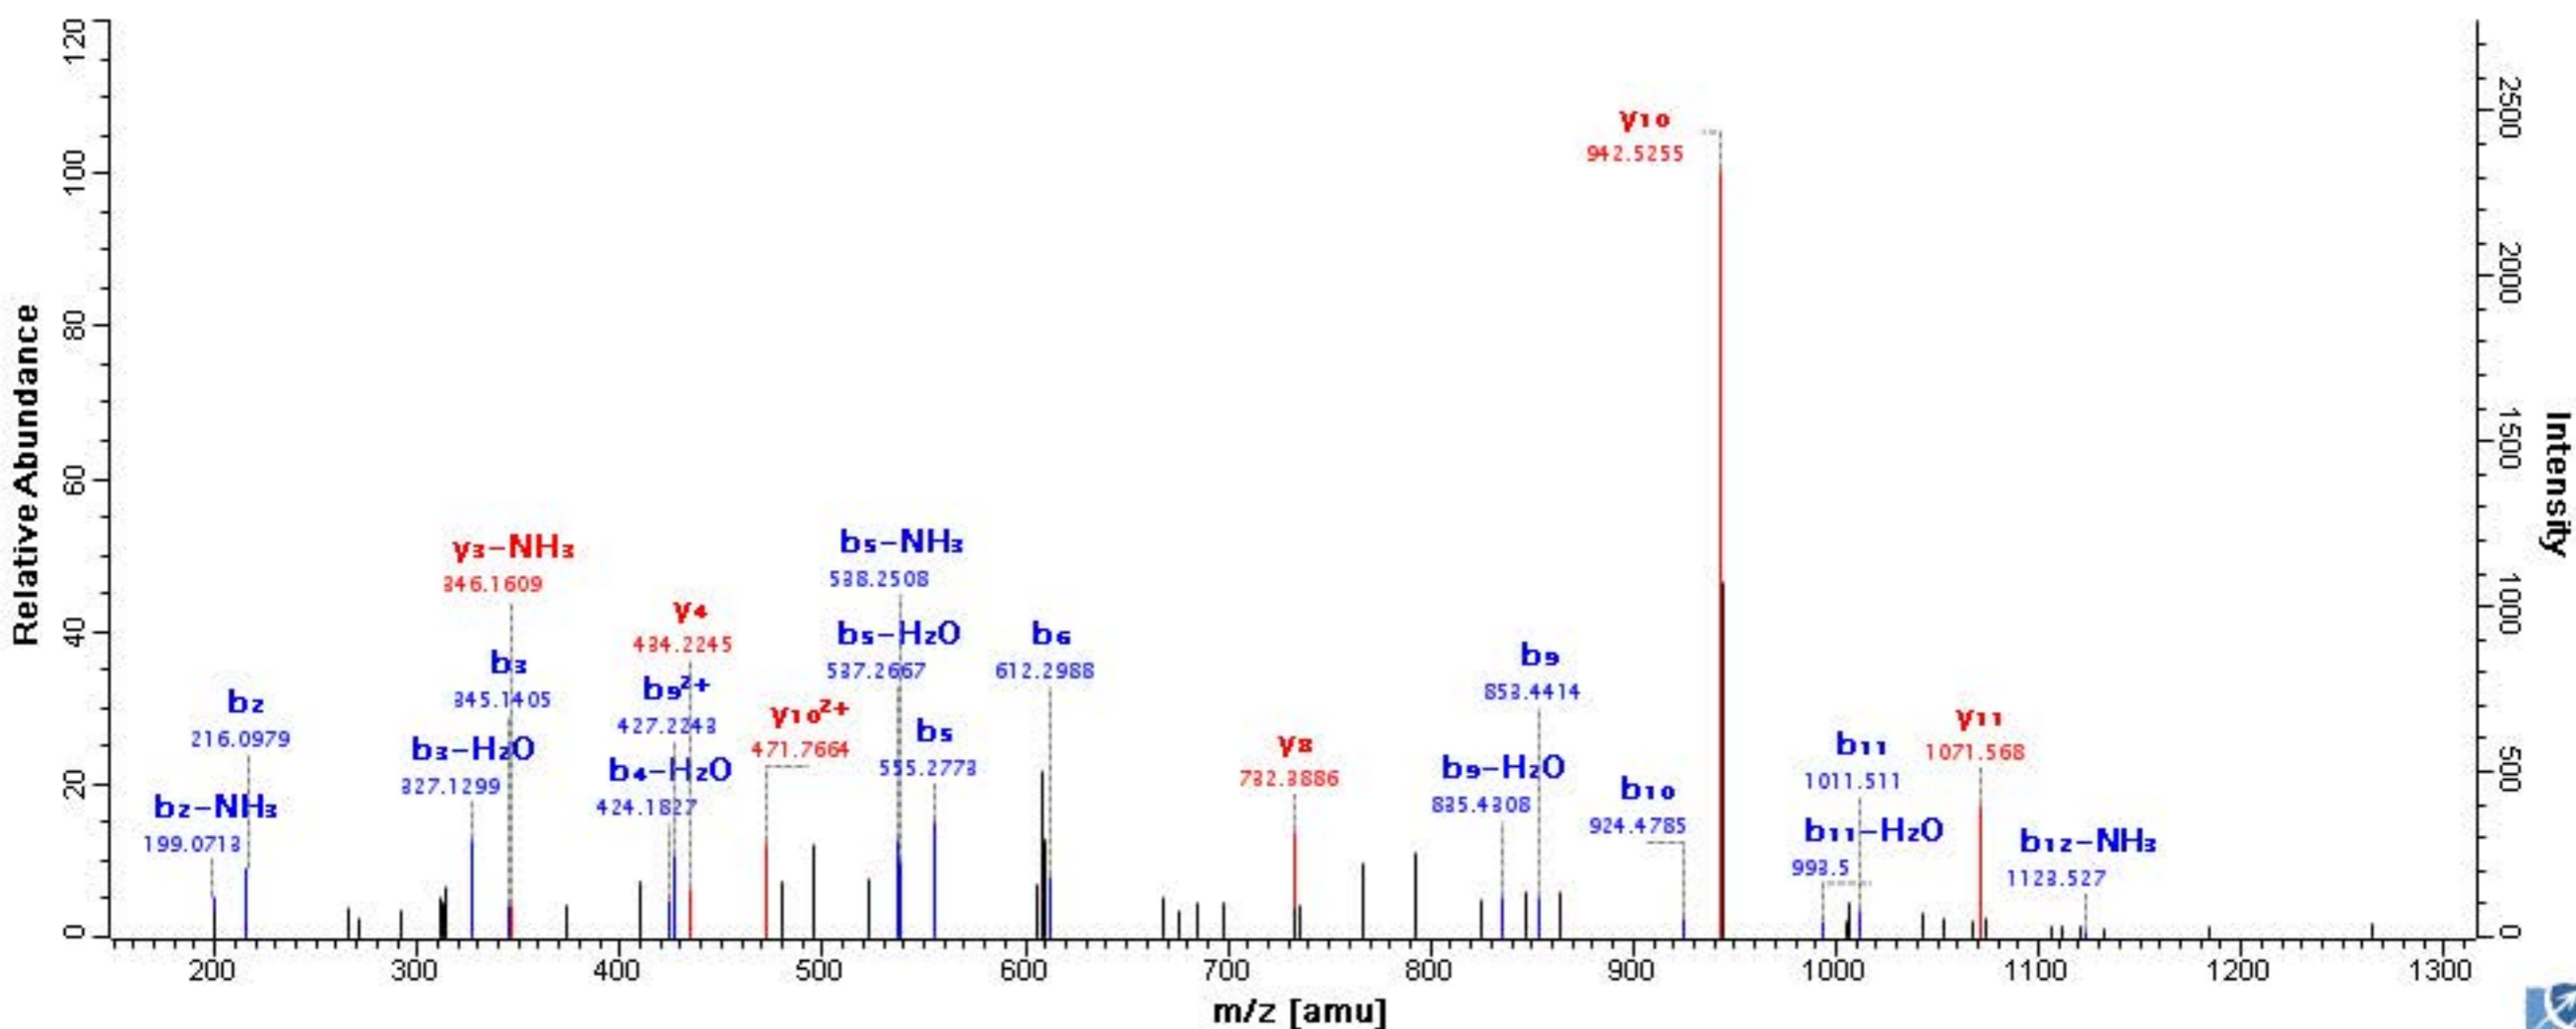

#### precursor information

|                   |                     |
|-------------------|---------------------|
| Mass:             | 1285.65152          |
| m/z:              | System.Collections. |
| Charge:           | System.Collections. |
| Retentiontime:    | System.Collections. |
| Score:            | 95.27338            |
| Mass Error [ppm]: | 0.096467            |
| PEP:              | 0.0003969           |
| Precursor Type:   | MULTI               |

#### general information

|                       |             |
|-----------------------|-------------|
| Annotation:           | 9 of 13     |
| AminoAcids Coverag    | 69 %        |
| Intensity Coverage:   | 51 %        |
| Protein Localisation: | 194 ... 206 |

| b <sup>2+</sup> ion |          | b ion     |          |     | y ion |          | y <sup>2+</sup> ion |           |          |
|---------------------|----------|-----------|----------|-----|-------|----------|---------------------|-----------|----------|
| Δ dalton            | mass     | Δ dalton  | mass     | seq |       | Δ dalton | mass                | Δ dalton  | mass     |
|                     | 115.0502 |           | 115.0502 | 1   | N     | 12       |                     |           |          |
|                     | 216.0979 | -0.108747 | 216.0979 | 2   | T     | 11       | 1172.616            |           | 1172.616 |
|                     | 345.1405 | +0.017422 | 345.1405 | 3   | E     | 10       | 1071.568            | +0.124805 | 1071.568 |
|                     | 442.1932 |           | 442.1932 | 4   | P     | 9        | 942.5255            | +0.08317  | 471.7664 |
|                     | 555.2773 | +0.106669 | 555.2773 | 5   | I     | 8        | 845.4727            |           | 845.4727 |
|                     | 612.2988 | +0.275696 | 612.2988 | 6   | G     | 7        | 732.3886            | +0.058865 | 732.3886 |
|                     | 669.3202 |           | 669.3202 | 7   | G     | 6        | 675.3672            |           | 675.3672 |
|                     | 782.4043 |           | 782.4043 | 8   | I     | 5        | 618.3457            |           | 618.3457 |
| +0.154137           | 427.2243 | +0.158567 | 853.4414 | 9   | A     | 4        | 505.2617            |           | 505.2617 |
|                     | 924.4785 | +0.296929 | 924.4785 | 10  | A     | 3        | 434.2245            | +0.378549 | 434.2245 |
|                     | 1011.511 | +0.259042 | 1011.511 | 11  | S     | 2        | 363.1874            |           | 363.1874 |
|                     | 1140.553 |           | 1140.553 | 12  | E     | 1        | 276.1554            |           | 276.1554 |
|                     |          |           |          | 13  | K     | 0        | 147.1128            |           | 147.1128 |

Source: 20120601\_VR\_Bsu\_TripleSILAC\_WTPPrkCPrpC\_GeLC\_F01  
 Scannumber: 16174  
 Protein: BSU07750; yflA  
 Peptide Score: 93.48  
 Method: ITMS; CID; 3

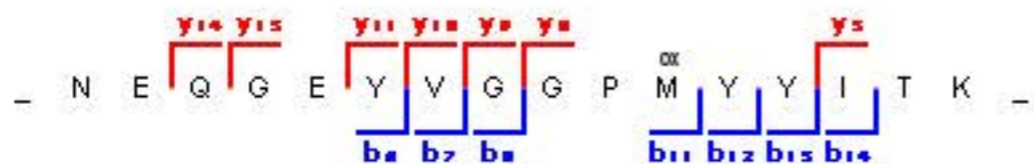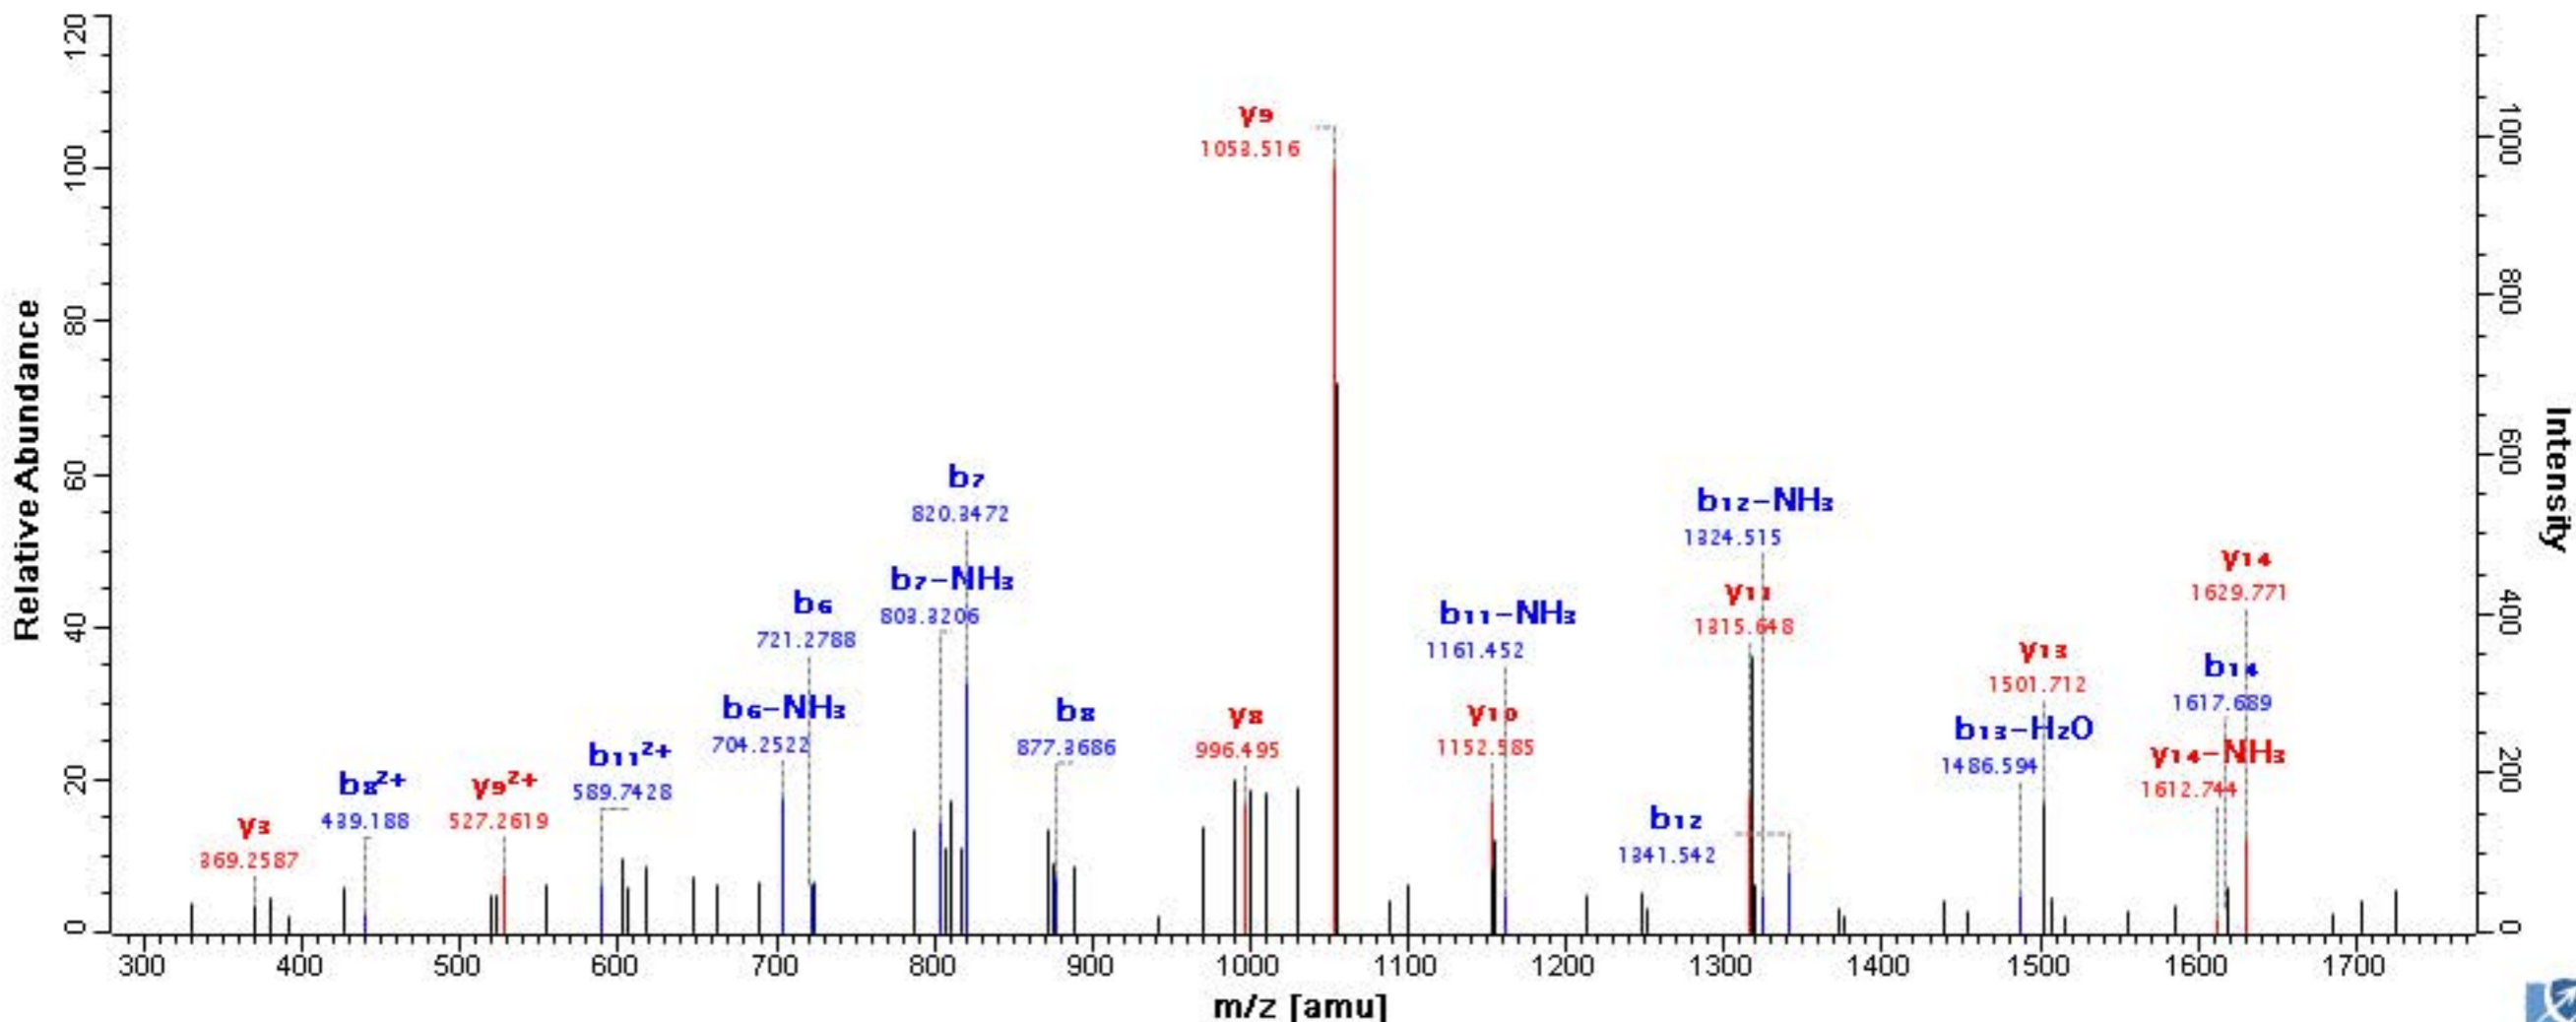

#### precursor information

|                   |                     |
|-------------------|---------------------|
| Mass:             | 1871.85024          |
| m/z:              | System.Collections. |
| Charge:           | System.Collections. |
| Retentiontime:    | System.Collections. |
| Score:            | 93.47838            |
| Mass Error [ppm]: | 0.60346             |
| PEP:              | 0.0024812           |
| Precursor Type:   | ISO                 |

| b <sup>2+</sup> ion |          | b ion     |          |     | y ion |          | y <sup>2+</sup> ion |           |          |         |
|---------------------|----------|-----------|----------|-----|-------|----------|---------------------|-----------|----------|---------|
| Δ dalton            | mass     | Δ dalton  | mass     | seq |       | Δ dalton | mass                | Δ dalton  | mass     |         |
|                     | 115.0502 |           | 115.0502 | 1   | N     | 15       |                     |           |          |         |
|                     | 244.0928 |           | 244.0928 | 2   | E     | 14       | 1758.813            |           | 1758.813 |         |
|                     | 372.1514 |           | 372.1514 | 3   | Q     | 13       | 1629.771            | +0.457524 | 1629.771 |         |
|                     | 429.1728 |           | 429.1728 | 4   | G     | 12       | 1501.712            | +0.206043 | 1501.712 |         |
|                     | 558.2154 |           | 558.2154 | 5   | E     | 11       | 1444.691            |           | 1444.691 |         |
|                     | 721.2788 | +0.358752 | 721.2788 | 6   | Y     | 10       | 1315.648            | +0.236042 | 1315.648 |         |
|                     | 820.3472 | +0.151911 | 820.3472 | 7   | V     | 9        | 1152.585            | -0.126533 | 1152.585 |         |
| +0.20102            | 439.188  | +0.207046 | 877.3686 | 8   | G     | 8        | 1053.516            | +0.028673 | 527.2619 | +0.2903 |
|                     | 934.3901 |           | 934.3901 | 9   | G     | 7        | 996.495             | +0.153469 | 996.495  |         |
|                     | 1031.443 |           | 1031.443 | 10  | P     | 6        | 939.4736            |           | 939.4736 |         |
| -0.470309           | 589.7428 |           | 1178.478 | 11  | M     | 5        | 842.4208            |           | 842.4208 |         |
|                     | 1341.542 | +0.261142 | 1341.542 | 12  | Y     | 4        | 695.3854            |           | 695.3854 |         |
|                     | 1504.605 |           | 1504.605 | 13  | Y     | 3        | 532.3221            |           | 532.3221 |         |
|                     | 1617.689 | +0.220805 | 1617.689 | 14  | I     | 2        | 369.2587            | -0.101488 | 369.2587 |         |
|                     | 1718.737 |           | 1718.737 | 15  | T     | 1        | 256.1747            |           | 256.1747 |         |
|                     |          |           |          | 16  | K     | 0        | 155.127             |           | 155.127  |         |

#### general information

|                       |             |
|-----------------------|-------------|
| Annotation:           | 10 of 16    |
| AminoAcids Coverag    | 62 %        |
| Intensity Coverage:   | 38 %        |
| Protein Localisation: | 126 ... 141 |

Source: 20120601\_VR\_Bsu\_TripleSILAC\_WTPPrkCPrpC\_GeLC\_F01  
 Scannumber: 24206  
 Protein: BSU03220; ycgO  
 Peptide Score: 58.98  
 Method: ITMS; CID; 3

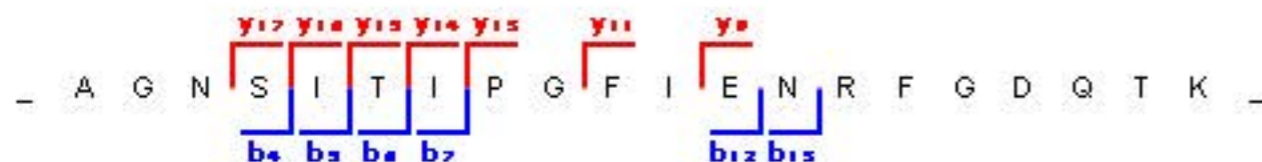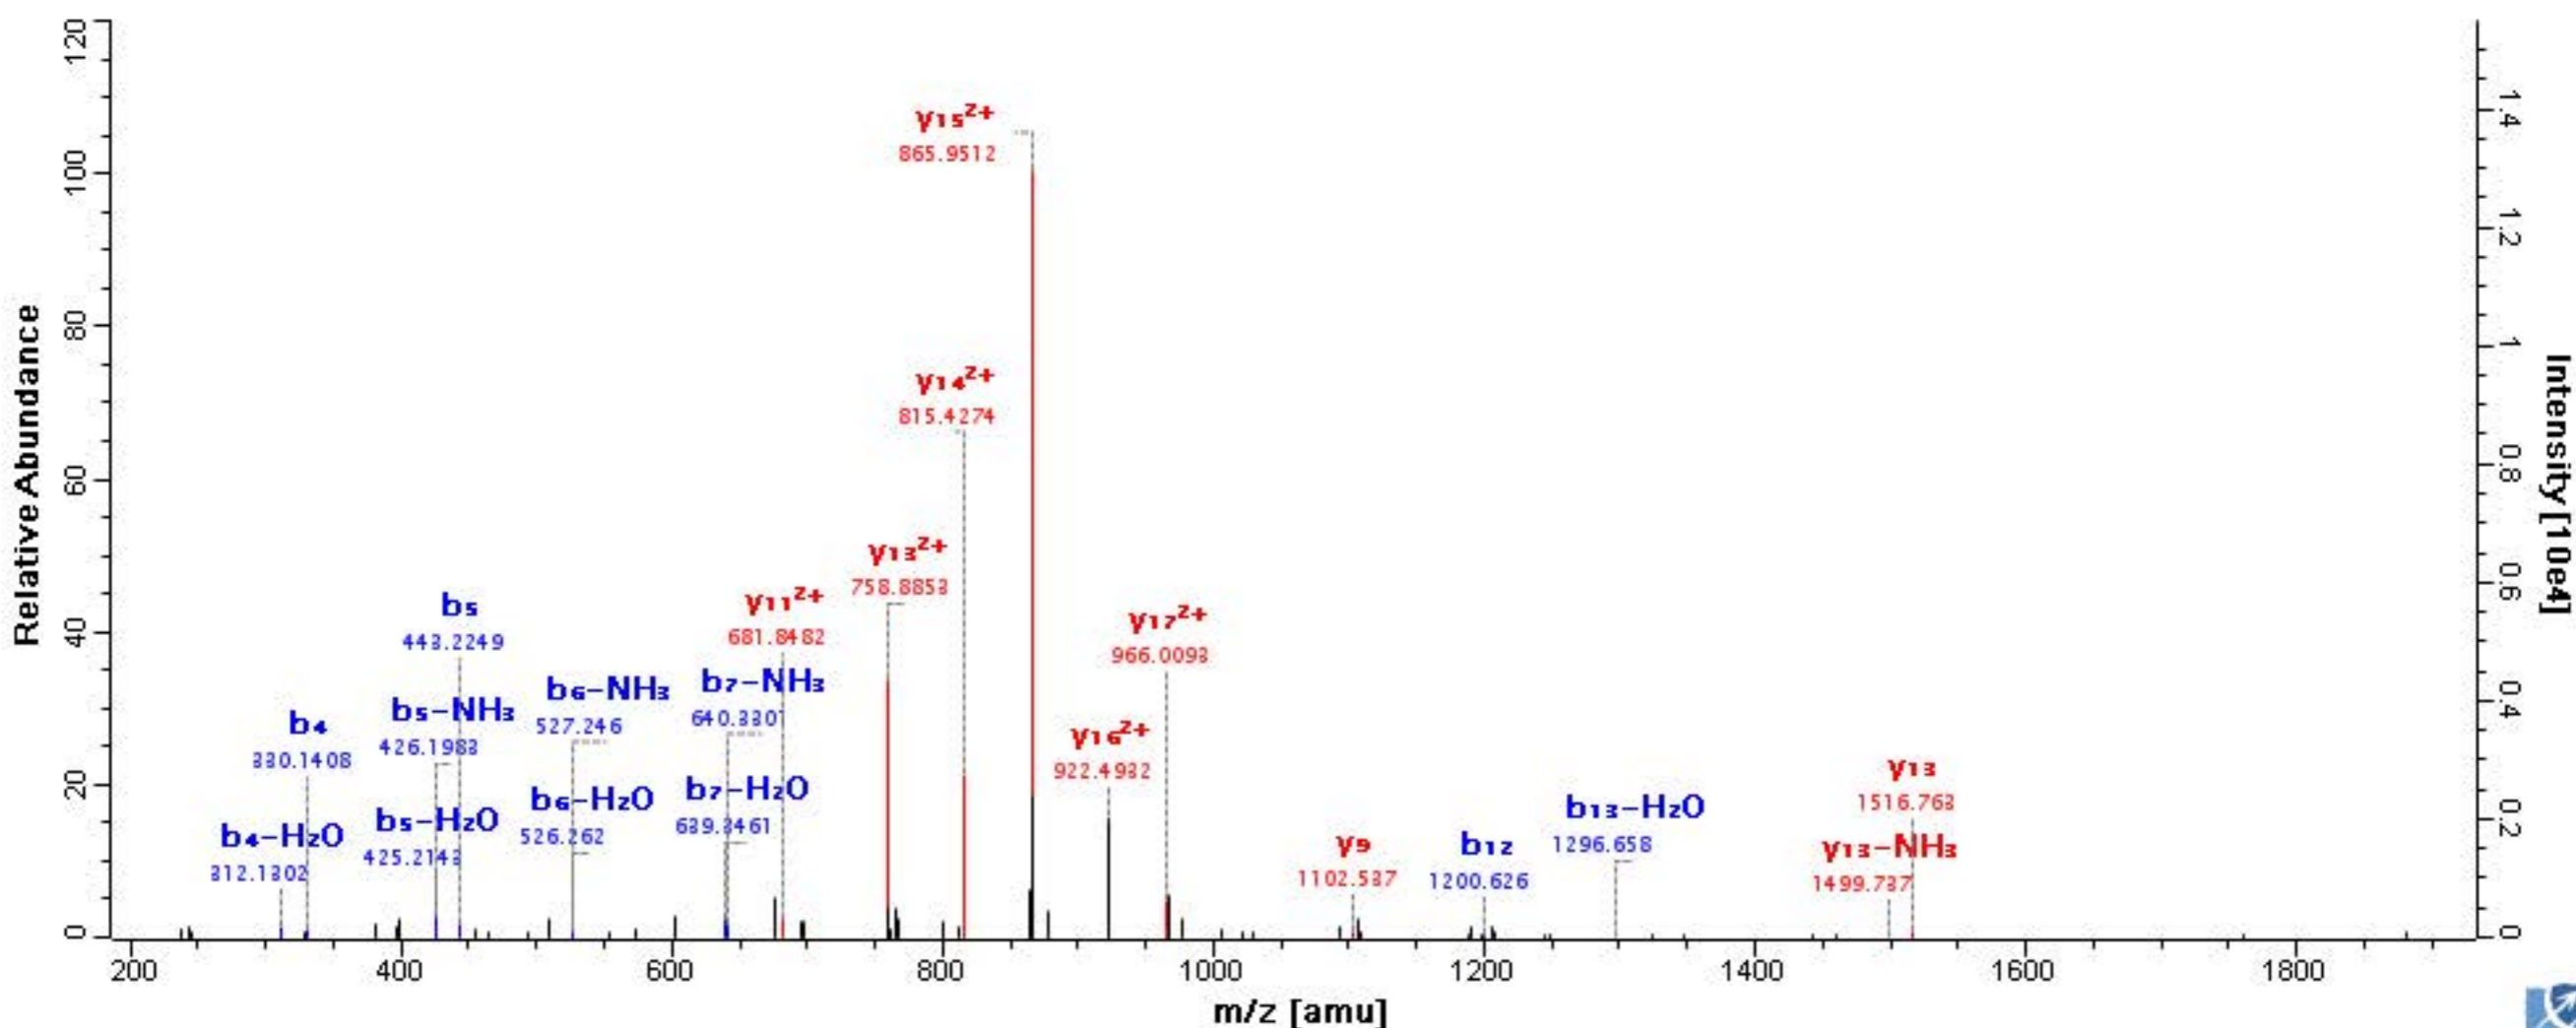

#### precursor information

|                   |                     |
|-------------------|---------------------|
| Mass:             | 2164.0903           |
| m/z:              | System.Collections. |
| Charge:           | System.Collections. |
| Retentiontime:    | System.Collections. |
| Score:            | 58.9802             |
| Mass Error [ppm]: | -0.45254            |
| PEP:              | 0.00073047          |
| Precursor Type:   | MULTI               |

| b ion      |              |    |     |    | y ion        |            | y <sup>2+</sup> ion |            |
|------------|--------------|----|-----|----|--------------|------------|---------------------|------------|
| Δ dalton   | mass         |    | seq |    | Δ dalton     | mass       | Δ dalton            | mass       |
|            | 72.044390254 | 1  | A   | 19 |              |            |                     |            |
|            | 129.06585398 | 2  | G   | 18 | 2102.0756427 |            | 2102.0756427        |            |
|            | 243.10878143 | 3  | N   | 17 | 2045.054179  |            | 2045.054179         |            |
| +0.0632002 | 330.14080984 | 4  | S   | 16 | 1931.0112515 |            | 966.009264          | -0.0703602 |
| -0.0755818 | 443.22487382 | 5  | I   | 15 | 1843.9792231 |            | 922.49324979        | -0.068323  |
|            | 544.27255229 | 6  | T   | 14 | 1730.8951591 |            | 865.9512178         | +0.2757109 |
|            | 657.35661627 | 7  | I   | 13 | 1629.8474807 |            | 815.42737857        | +0.4268084 |
|            | 754.40938012 | 8  | P   | 12 | 1516.7634167 | +0.235973  | 758.88534658        | +0.266631  |
|            | 811.43084385 | 9  | G   | 11 | 1419.7106528 |            | 1419.7106528        |            |
|            | 958.49925776 | 10 | F   | 10 | 1362.6891891 |            | 681.84823279        | -0.234097  |
|            | 1071.5833217 | 11 | I   | 9  | 1215.6207752 |            | 1215.6207752        |            |
| +0.0382697 | 1200.6259148 | 12 | E   | 8  | 1102.5367112 | +0.4026198 | 1102.5367112        |            |
|            | 1314.6688423 | 13 | N   | 7  | 973.49411812 |            | 973.49411812        |            |
|            | 1470.7699533 | 14 | R   | 6  | 859.45119067 |            | 859.45119067        |            |
|            | 1617.8383672 | 15 | F   | 5  | 703.35007964 |            | 703.35007964        |            |
|            | 1674.859831  | 16 | G   | 4  | 556.28166572 |            | 556.28166572        |            |
|            | 1789.886774  | 17 | D   | 3  | 499.260202   |            | 499.260202          |            |
|            | 1917.9453515 | 18 | Q   | 2  | 384.23325897 |            | 384.23325897        |            |
|            | 2018.99303   | 19 | T   | 1  | 256.17468146 |            | 256.17468146        |            |
|            |              | 20 | K   | 0  | 155.12700298 |            | 155.12700298        |            |

#### general information

|                       |            |
|-----------------------|------------|
| Annotation:           | 8 of 20    |
| AminoAcids Coverage:  | 40 %       |
| Intensity Coverage:   | 63 %       |
| Protein Localisation: | 87 ... 106 |

Source: 201 20601\_VR\_Bsu\_TripleSILAC\_WTPPrkCPrpC\_GeLC\_FD1  
 Scannumber: 7906  
 Protein: BSU01680; ybbF  
 Peptide Score: 101.97  
 Method: ITMS; CID; 3

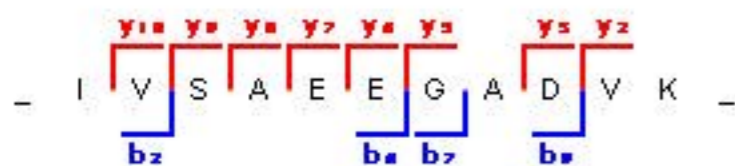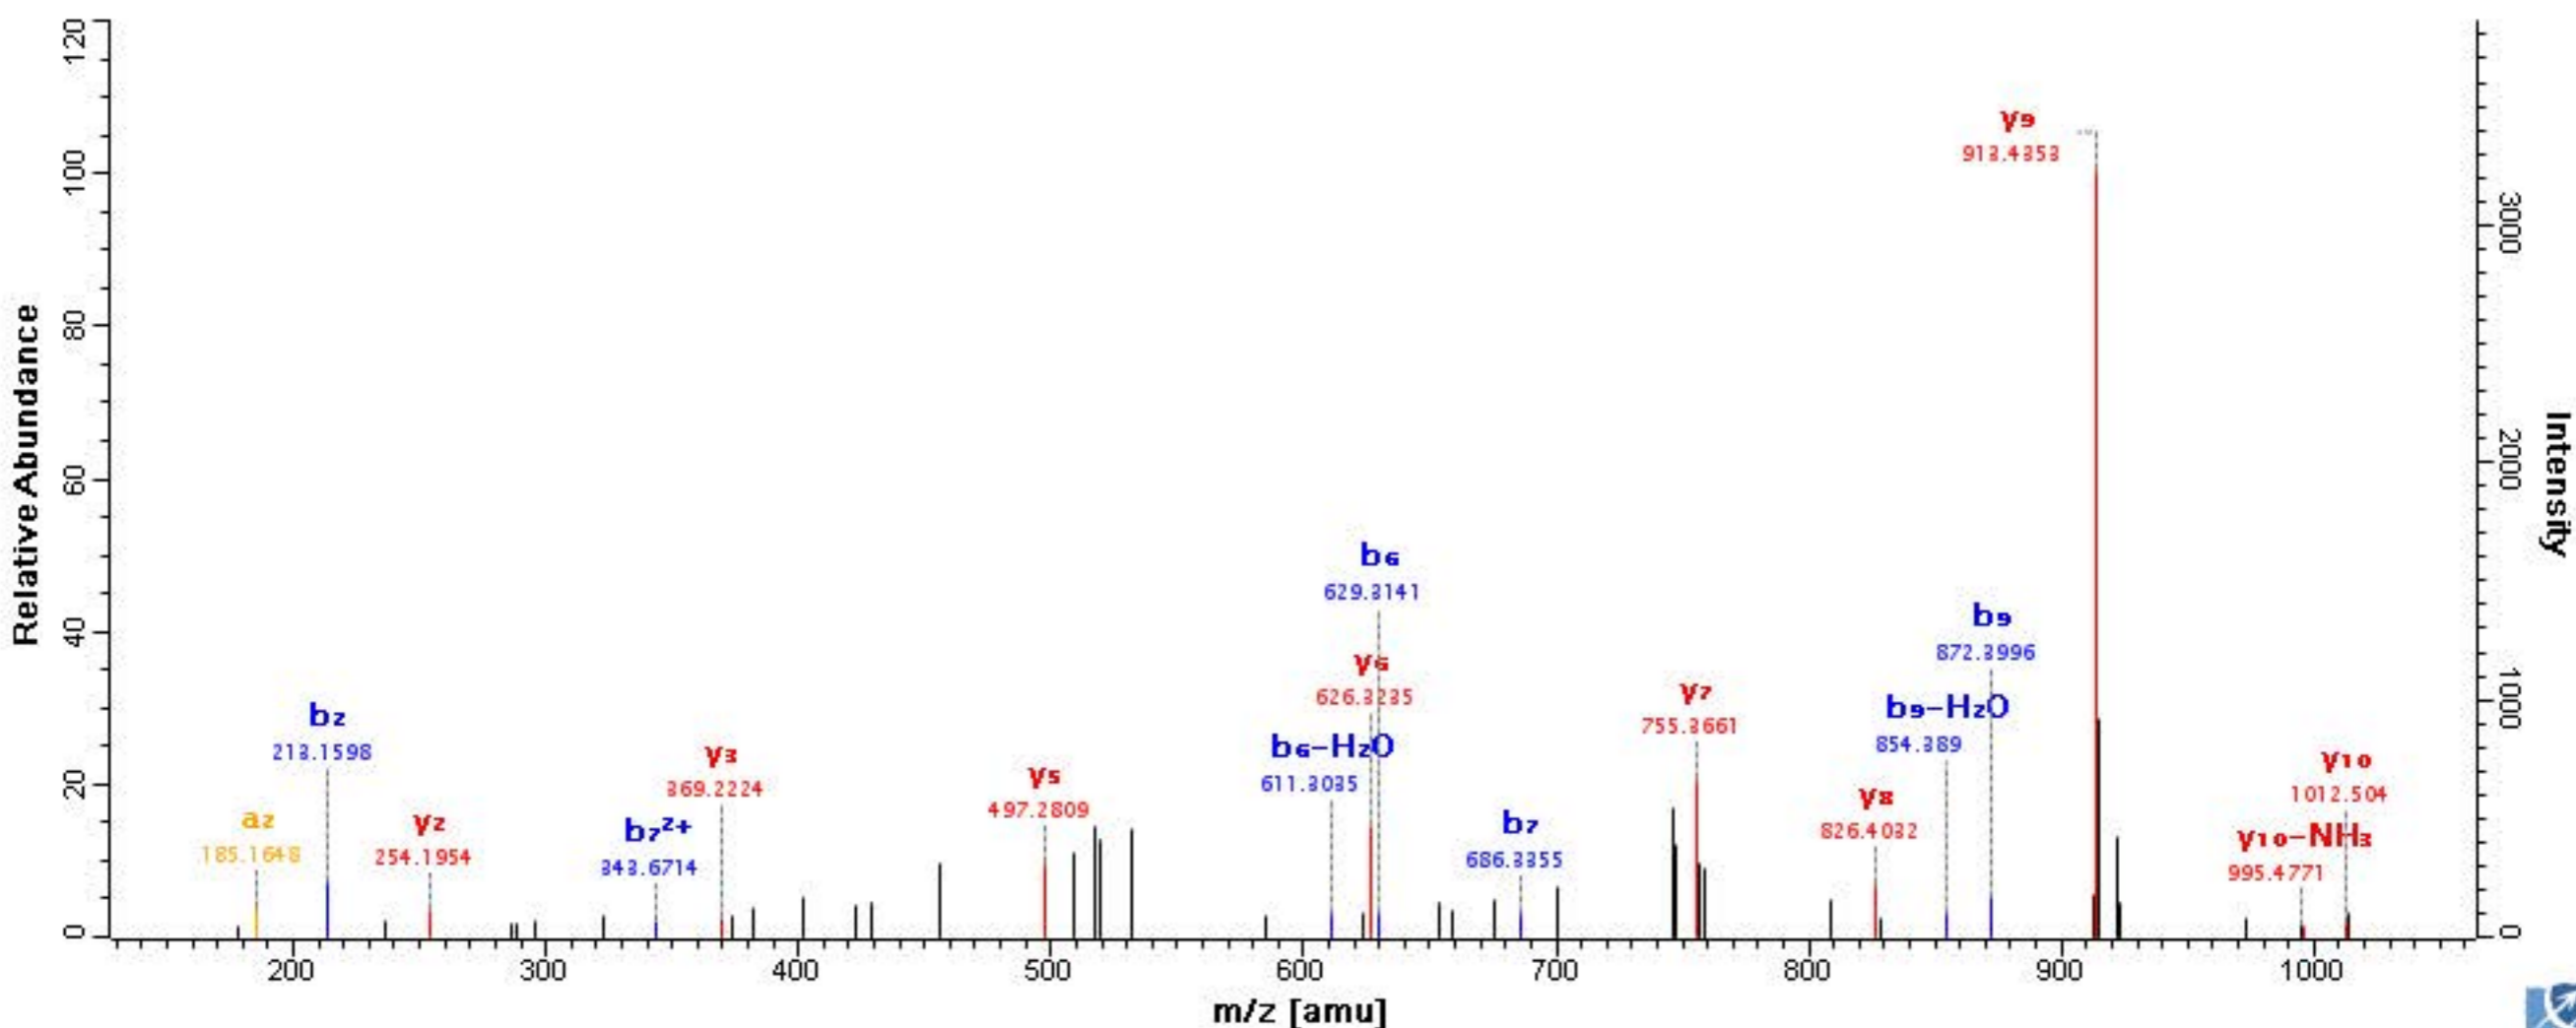

#### precursor information

|                   |                     |
|-------------------|---------------------|
| Mass:             | 1116.56649          |
| m/z:              | System.Collections. |
| Charge:           | System.Collections. |
| Retentiontime:    | System.Collections. |
| Score:            | 101.9741            |
| Mass Error [ppm]: | 0.19375             |
| PEP:              | 0.00041337          |
| Precursor Type:   | MULTI               |

#### general information

|                       |           |
|-----------------------|-----------|
| Annotation:           | 8 of 11   |
| AminoAcids Coverage:  | 73 %      |
| Intensity Coverage:   | 45 %      |
| Protein Localisation: | 83 ... 93 |

| a ion     |          | b <sup>2+</sup> ion |          | b ion     |          |     | y ion    |           |
|-----------|----------|---------------------|----------|-----------|----------|-----|----------|-----------|
| Δ dalton  | mass     | Δ dalton            | mass     | Δ dalton  | mass     | seq | Δ dalton | mass      |
|           | 86.09643 |                     | 114.0913 |           | 114.0913 | 1   |          |           |
| -0.028335 | 185.1648 |                     | 213.1598 | +0.037908 | 213.1598 | 2   | 1012.504 | +0.369489 |
|           | 272.1969 |                     | 300.1918 |           | 300.1918 | 3   | 913.4353 | +0.00669  |
|           | 343.234  |                     | 371.2289 |           | 371.2289 | 4   | 826.4032 | +0.019248 |
|           | 472.2766 |                     | 500.2715 |           | 500.2715 | 5   | 755.3661 | -0.005589 |
|           | 601.3192 |                     | 629.3141 | -0.003719 | 629.3141 | 6   | 626.3235 | -0.020613 |
|           | 658.3406 | -0.428553           | 343.6714 | +0.05514  | 686.3355 | 7   | 497.2809 | +0.468513 |
|           | 729.3777 |                     | 757.3727 |           | 757.3727 | 8   | 440.2595 |           |
|           | 844.4047 |                     | 872.3996 | +0.322992 | 872.3996 | 9   | 369.2224 | +0.051749 |
|           | 943.4731 |                     | 971.468  |           | 971.468  | 10  | 254.1954 | +0.151156 |
|           |          |                     |          |           |          | 11  | 155.127  |           |

Source: 20120601\_VR\_Bsu\_TripleSILAC\_WTPPrkCPrpC\_GeLC\_F01  
 Scannumber: 8668  
 Protein: BSU05680; ydgK  
 Peptide Score: 90.91  
 Method: ITMS; CID; 3

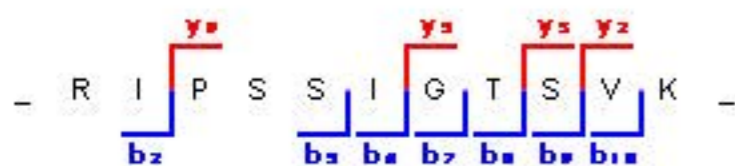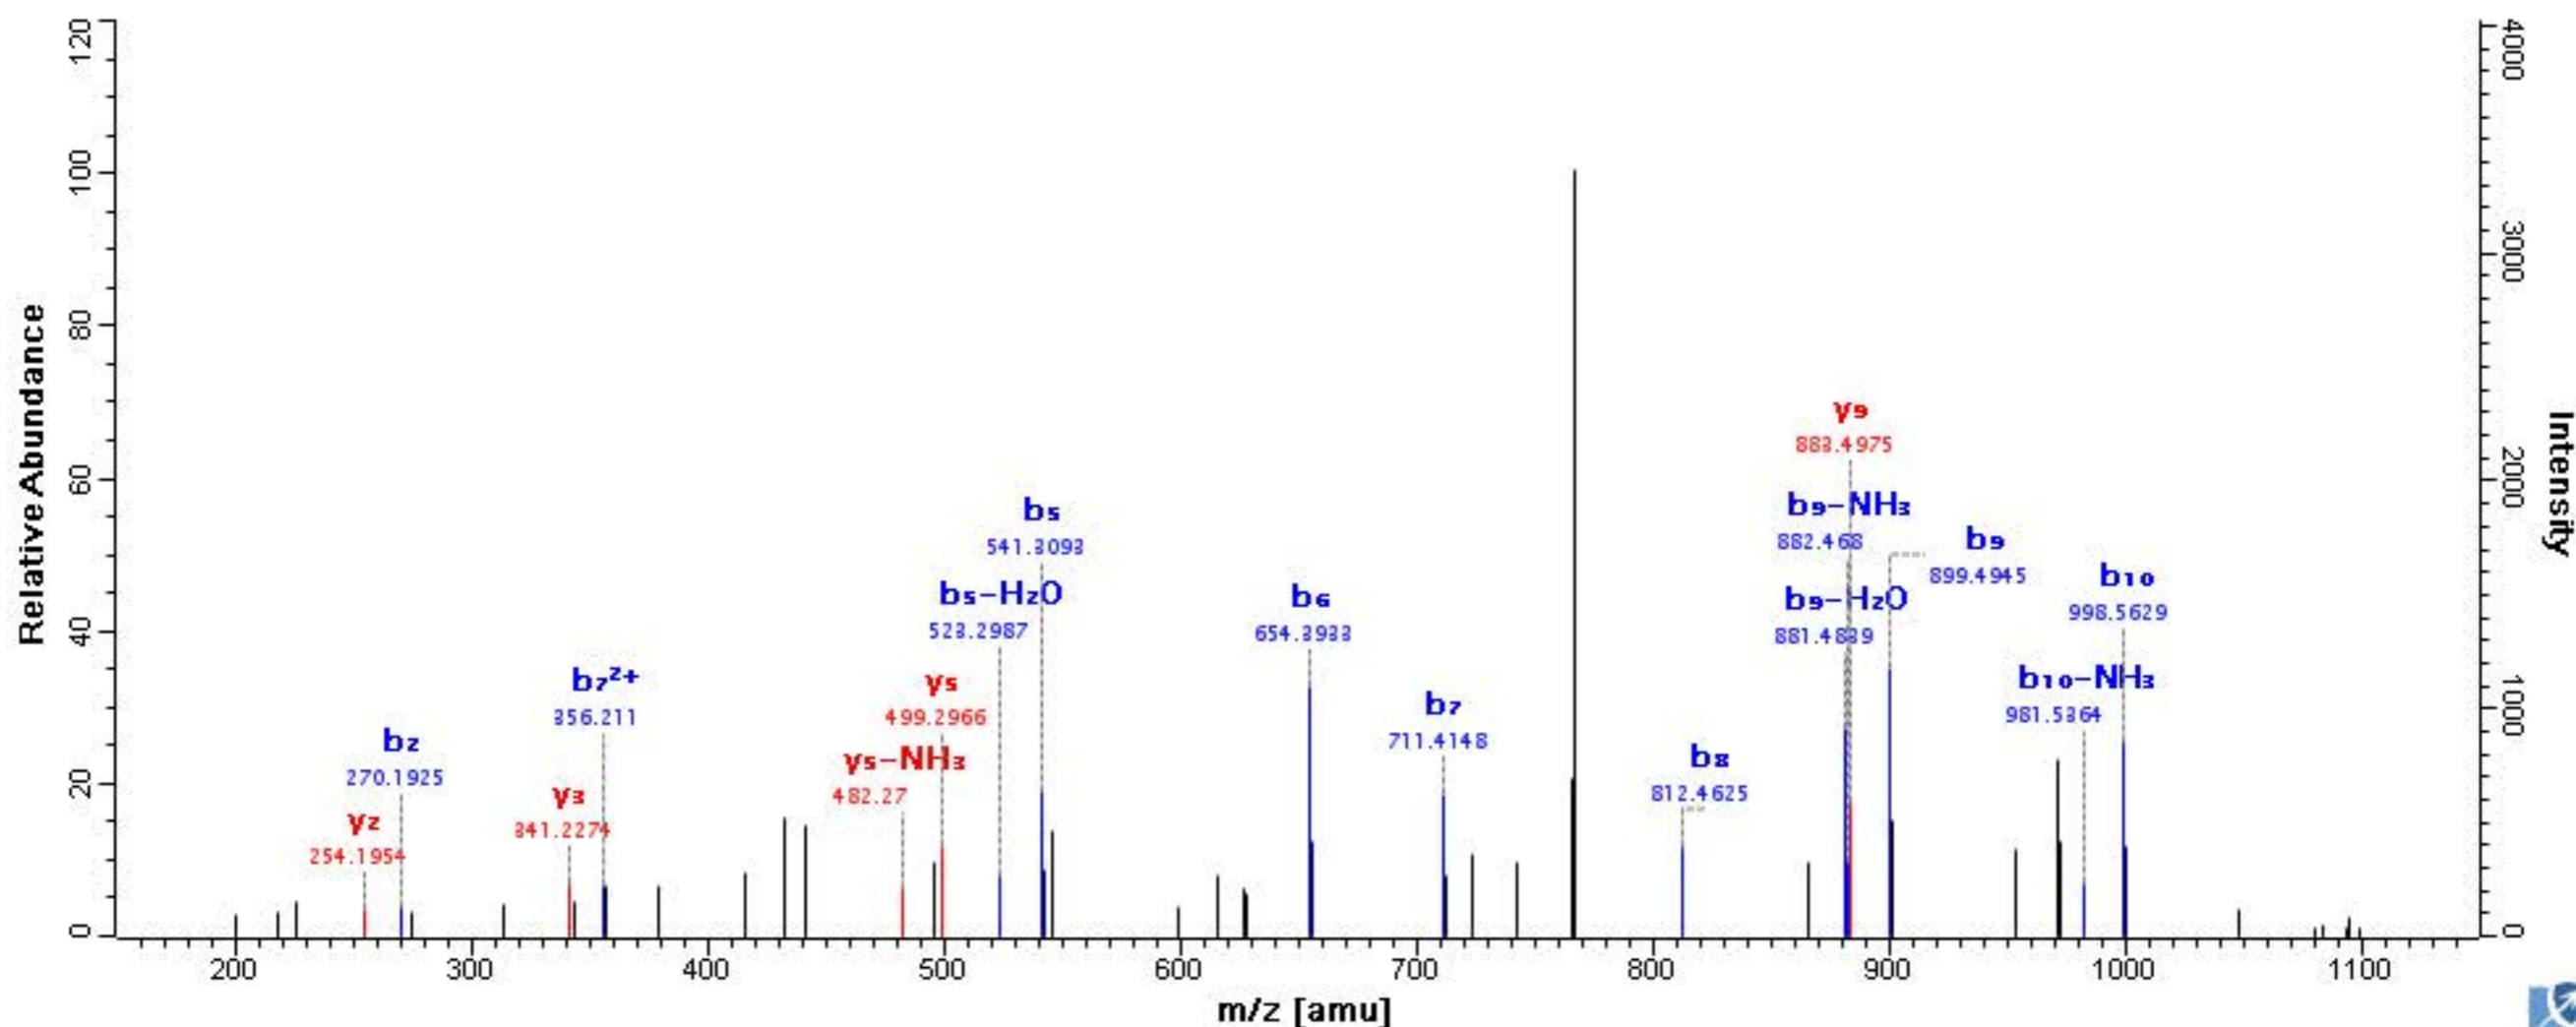

#### precursor information

|                   |                     |
|-------------------|---------------------|
| Mass:             | 1143.66125          |
| m/z:              | System.Collections. |
| Charge:           | System.Collections. |
| Retentiontime:    | System.Collections. |
| Score:            | 90.91307            |
| Mass Error [ppm]: | 0.071516            |
| PEP:              | 0.0016635           |
| Precursor Type:   | MULTI               |

#### general information

|                       |             |
|-----------------------|-------------|
| Annotation:           | 8 of 11     |
| AminoAcids Coverage:  | 73 %        |
| Intensity Coverage:   | 38 %        |
| Protein Localisation: | 198 ... 208 |

| b <sup>2+</sup> ion |              | b ion      |              |     | y ion    |      |              |            |
|---------------------|--------------|------------|--------------|-----|----------|------|--------------|------------|
| Δ dalton            | mass         | Δ dalton   | mass         | seq | Δ dalton | mass |              |            |
|                     | 157.10838749 |            | 157.10838749 | 1   | R        | 10   |              |            |
|                     | 270.19245148 | +0.0606918 | 270.19245148 | 2   | I        | 9    | 996.58153614 |            |
|                     | 367.24521533 |            | 367.24521533 | 3   | P        | 8    | 883.49747216 | +0.0647227 |
|                     | 454.27724374 |            | 454.27724374 | 4   | S        | 7    | 786.44470831 |            |
|                     | 541.30927215 | +0.0076834 | 541.30927215 | 5   | S        | 6    | 699.4126799  |            |
|                     | 654.39333613 | +0.1401722 | 654.39333613 | 6   | I        | 5    | 612.38065149 |            |
| -0.0316558          | 356.21103816 | -0.0025684 | 711.41479985 | 7   | G        | 4    | 499.29658751 | +0.0970893 |
|                     | 812.46247833 | +0.0169528 | 812.46247833 | 8   | T        | 3    | 442.27512378 |            |
|                     | 899.49450673 | -0.0045775 | 899.49450673 | 9   | S        | 2    | 341.22744531 | +0.1413901 |
|                     | 998.56292065 | +0.011054  | 998.56292065 | 10  | V        | 1    | 254.1954169  | +0.0381036 |
|                     |              |            |              | 11  | K        | 0    | 155.12700298 |            |

Source: 20120601\_VR\_Bsu\_TripleSILAC\_WTPPrkCPrpC\_GeLC\_F02  
 Scannumber: 20144  
 Protein: BSU06310; gabP  
 Peptide Score: 99.94  
 Method: ITMS; CID; 3

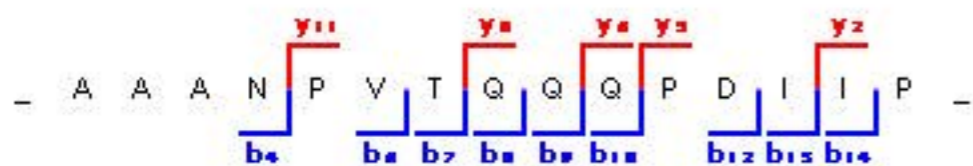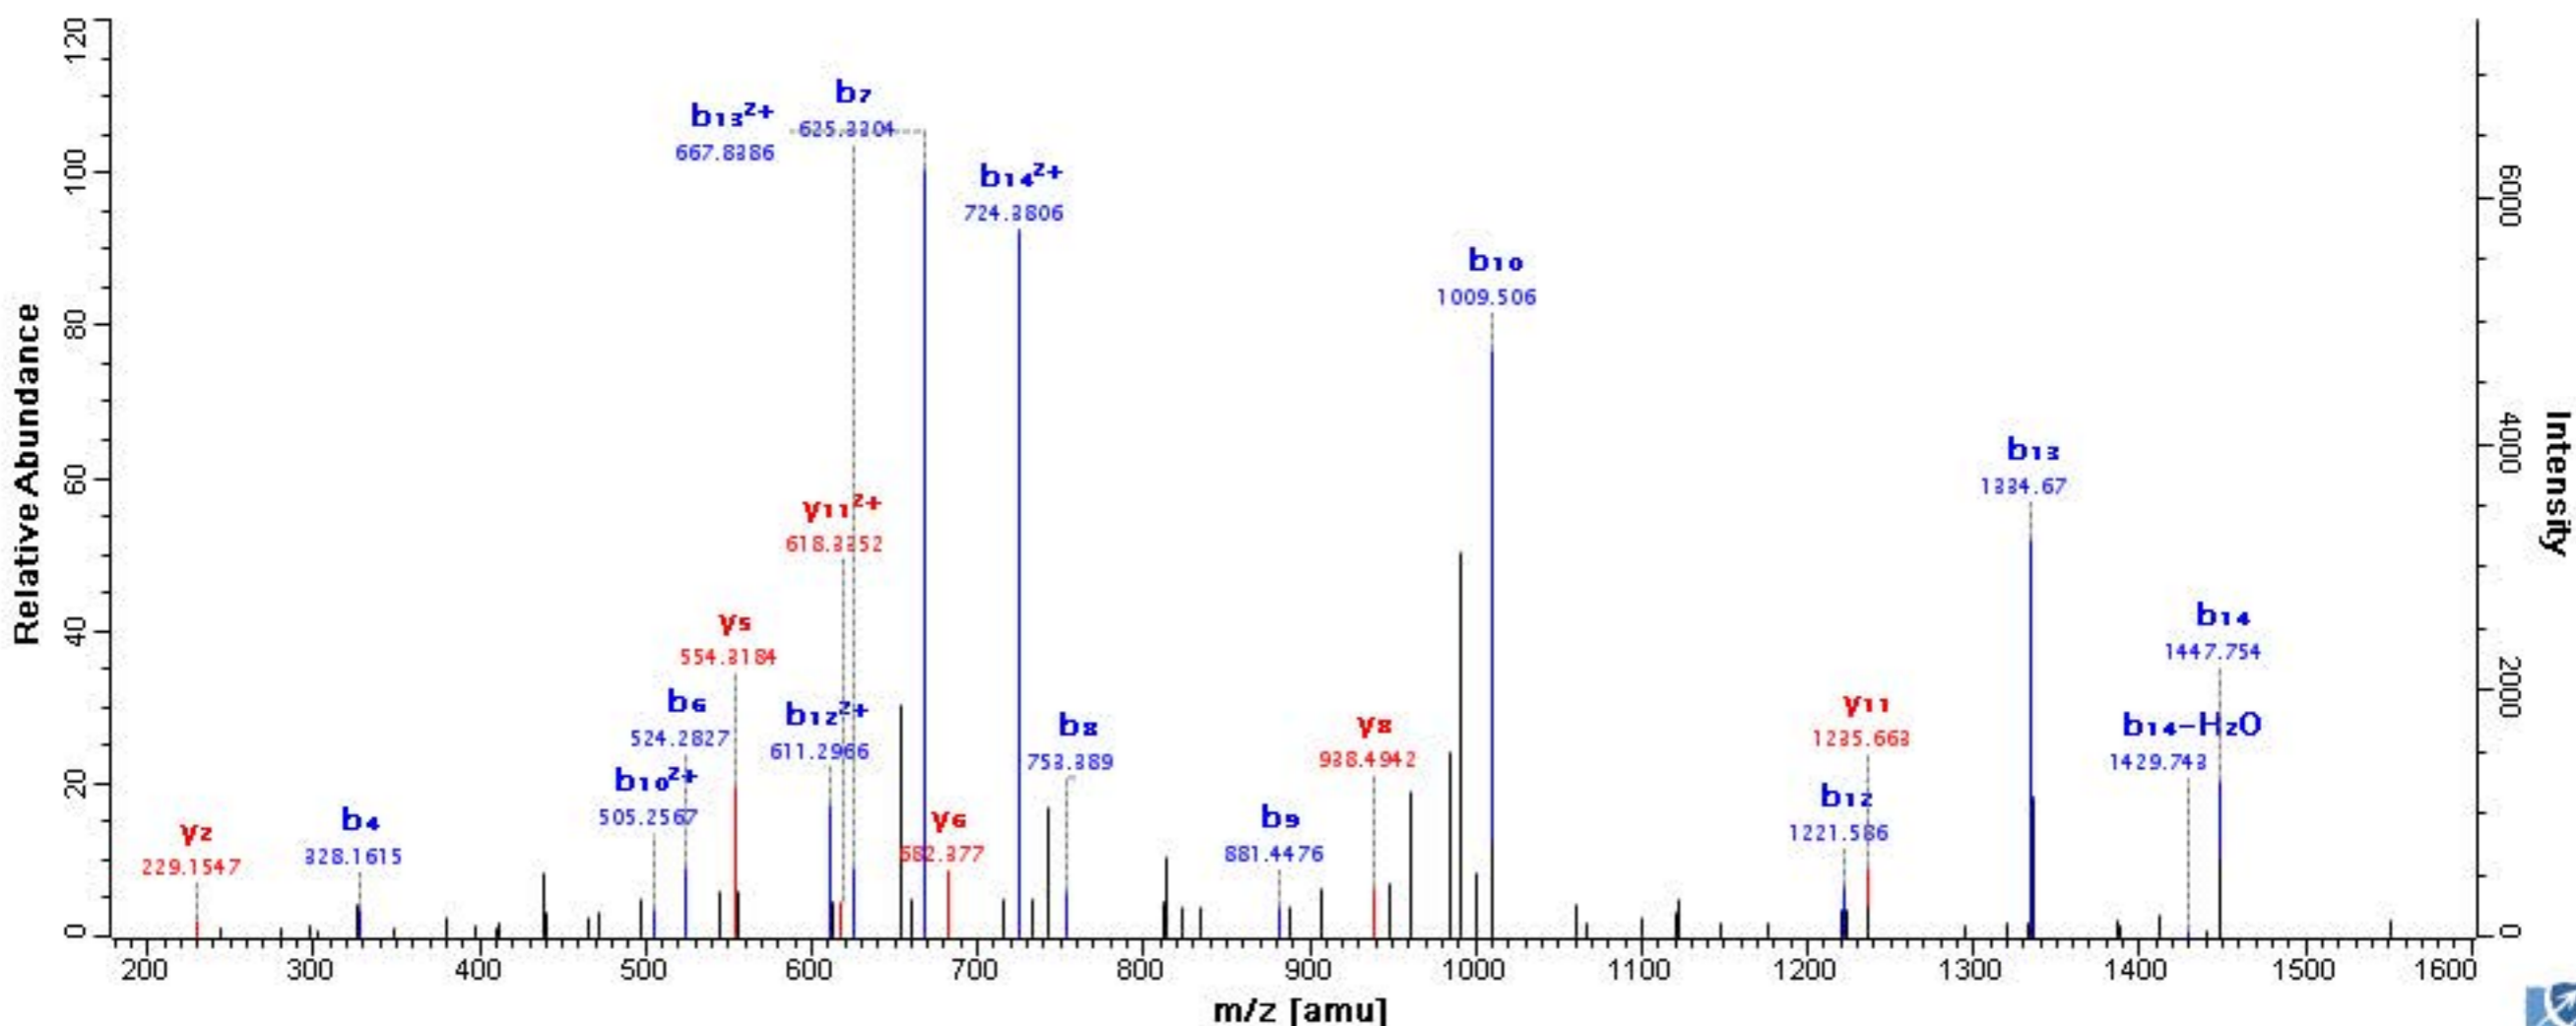

#### precursor information

|                   |                     |
|-------------------|---------------------|
| Mass:             | 1561.81087          |
| m/z:              | System.Collections. |
| Charge:           | System.Collections. |
| Retentiontime:    | System.Collections. |
| Score:            | 99.94125            |
| Mass Error [ppm]: | 0.5412              |
| PEP:              | 0.0041949           |
| Precursor Type:   | ISO                 |

| b <sup>2+</sup> ion |          | b ion     |          | seq |   |    | y ion    |           | y <sup>2+</sup> ion |           |
|---------------------|----------|-----------|----------|-----|---|----|----------|-----------|---------------------|-----------|
| Δ dalton            | mass     | Δ dalton  | mass     |     |   |    | Δ dalton | mass      | Δ dalton            | mass      |
|                     | 72.04439 |           | 72.04439 | 1   | A | 14 |          |           |                     |           |
|                     | 143.0815 |           | 143.0815 | 2   | A | 13 | 1491.78  |           | 1491.78             |           |
|                     | 214.1186 |           | 214.1186 | 3   | A | 12 | 1420.743 |           | 1420.743            |           |
|                     | 328.1615 | +0.124527 | 328.1615 | 4   | N | 11 | 1349.706 |           | 1349.706            |           |
|                     | 425.2143 |           | 425.2143 | 5   | P | 10 | 1235.663 | +0.138119 | 618.3352            | -0.443551 |
|                     | 524.2827 | +0.04705  | 524.2827 | 6   | V | 9  | 1138.61  |           | 1138.61             |           |
|                     | 625.3304 | +0.04588  | 625.3304 | 7   | T | 8  | 1039.542 |           | 1039.542            |           |
|                     | 753.389  | +0.380796 | 753.389  | 8   | Q | 7  | 938.4942 | +0.268767 | 938.4942            |           |
|                     | 881.4476 | +0.337295 | 881.4476 | 9   | Q | 6  | 810.4356 |           | 810.4356            |           |
| -0.366935           | 505.2567 | +0.076263 | 1009.506 | 10  | Q | 5  | 682.377  | +0.144528 | 682.377             |           |
|                     | 1106.559 |           | 1106.559 | 11  | P | 4  | 554.3184 | +0.08604  | 554.3184            |           |
| +0.05299            | 611.2966 | +0.167211 | 1221.586 | 12  | D | 3  | 457.2657 |           | 457.2657            |           |
| +0.06772            | 667.8386 | +0.072283 | 1334.67  | 13  | I | 2  | 342.2387 |           | 342.2387            |           |
| +0.162407           | 724.3806 | +0.137511 | 1447.754 | 14  | I | 1  | 229.1547 | -0.058172 | 229.1547            |           |
|                     |          |           |          | 15  | P | 0  | 116.0706 |           | 116.0706            |           |

#### general information

|                       |             |
|-----------------------|-------------|
| Annotation:           | 11 of 15    |
| AminoAcids Coverage:  | 73 %        |
| Intensity Coverage:   | 56 %        |
| Protein Localisation: | 455 ... 469 |



Source: 20120601\_VR\_Bsu\_TripleSILAC\_WTPPrkCPrpC\_GeLC\_FD2  
 Scannumber: 22256  
 Protein: BSU33330; yvsH  
 Peptide Score: 90.15  
 Method: ITMS; CID; 3

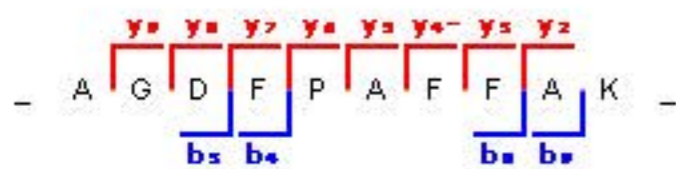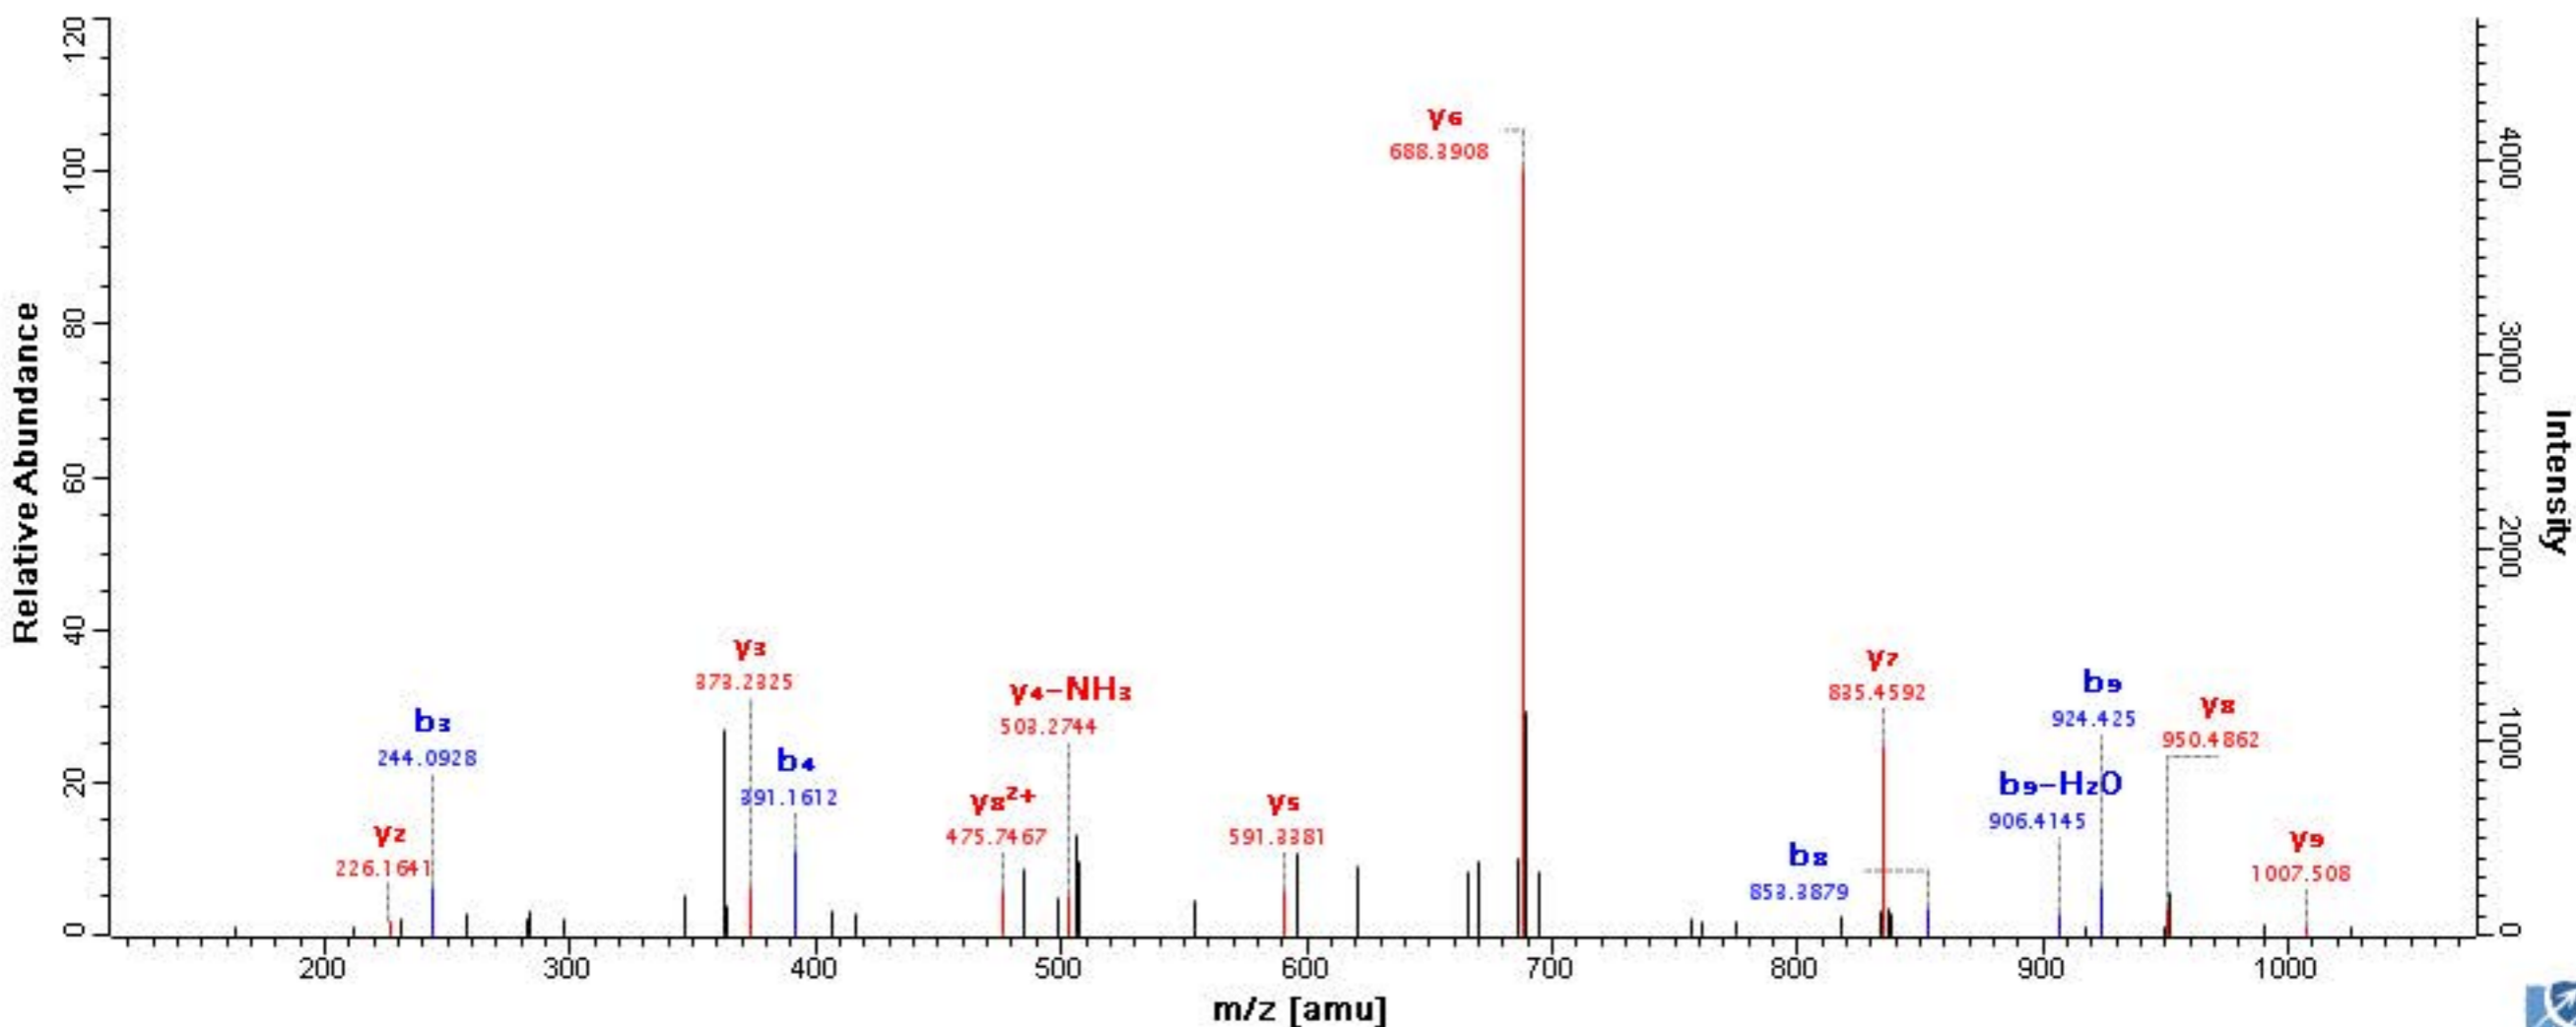

**precursor information**

|                   |                     |
|-------------------|---------------------|
| Mass:             | 1069.5248           |
| m/z:              | System.Collections. |
| Charge:           | System.Collections. |
| Retentiontime:    | System.Collections. |
| Score:            | 90.15039            |
| Mass Error [ppm]: | 1.408               |
| PEP:              | 0.0019868           |
| Precursor Type:   | MULTI               |

**general information**

|                       |             |
|-----------------------|-------------|
| Annotation:           | 8 of 10     |
| AminoAcids Coverage:  | 80 %        |
| Intensity Coverage:   | 47 %        |
| Protein Localisation: | 332 ... 341 |

| b ion      |              |    |     |   | γ ion        |            | γ <sup>2+</sup> ion |            |
|------------|--------------|----|-----|---|--------------|------------|---------------------|------------|
| Δ dalton   | mass         |    | seq |   | Δ dalton     | mass       | Δ dalton            | mass       |
|            | 72.044390254 | 1  | A   | 9 |              |            |                     |            |
|            | 129.06585398 | 2  | G   | 8 | 1007.5076429 | +0.1785753 | 1007.5076429        |            |
| -0.0469443 | 244.09279701 | 3  | D   | 7 | 950.48617919 | +0.0267603 | 475.74672783        | +0.0906135 |
| +0.2452832 | 391.16121093 | 4  | F   | 6 | 835.45923616 | +0.0017013 | 835.45923616        |            |
|            | 488.21397478 | 5  | P   | 5 | 688.39082224 | -0.0406025 | 688.39082224        |            |
|            | 559.25108857 | 6  | A   | 4 | 591.33805839 | -0.012741  | 591.33805839        |            |
|            | 706.31950248 | 7  | F   | 3 | 520.3009446  |            | 520.3009446         |            |
| +0.1364977 | 853.3879164  | 8  | F   | 2 | 373.23253069 | -0.0850087 | 373.23253069        |            |
| -0.0095028 | 924.42503019 | 9  | A   | 1 | 226.16411677 | +0.0478888 | 226.16411677        |            |
|            |              | 10 | K   | 0 | 155.12700298 |            | 155.12700298        |            |

Source: 20120601\_VR\_Bsu\_TripleSILAC\_WTPrkCPrpC\_GeLC\_FD3  
 Scannumber: 12622  
 Protein: BSU03670; yclF  
 Peptide Score: 109.29  
 Method: ITMS; CID; 3

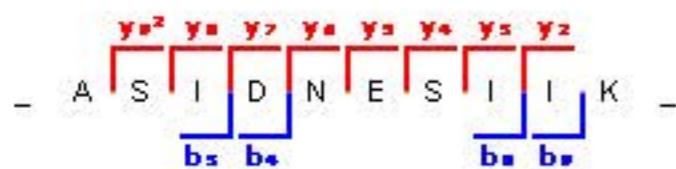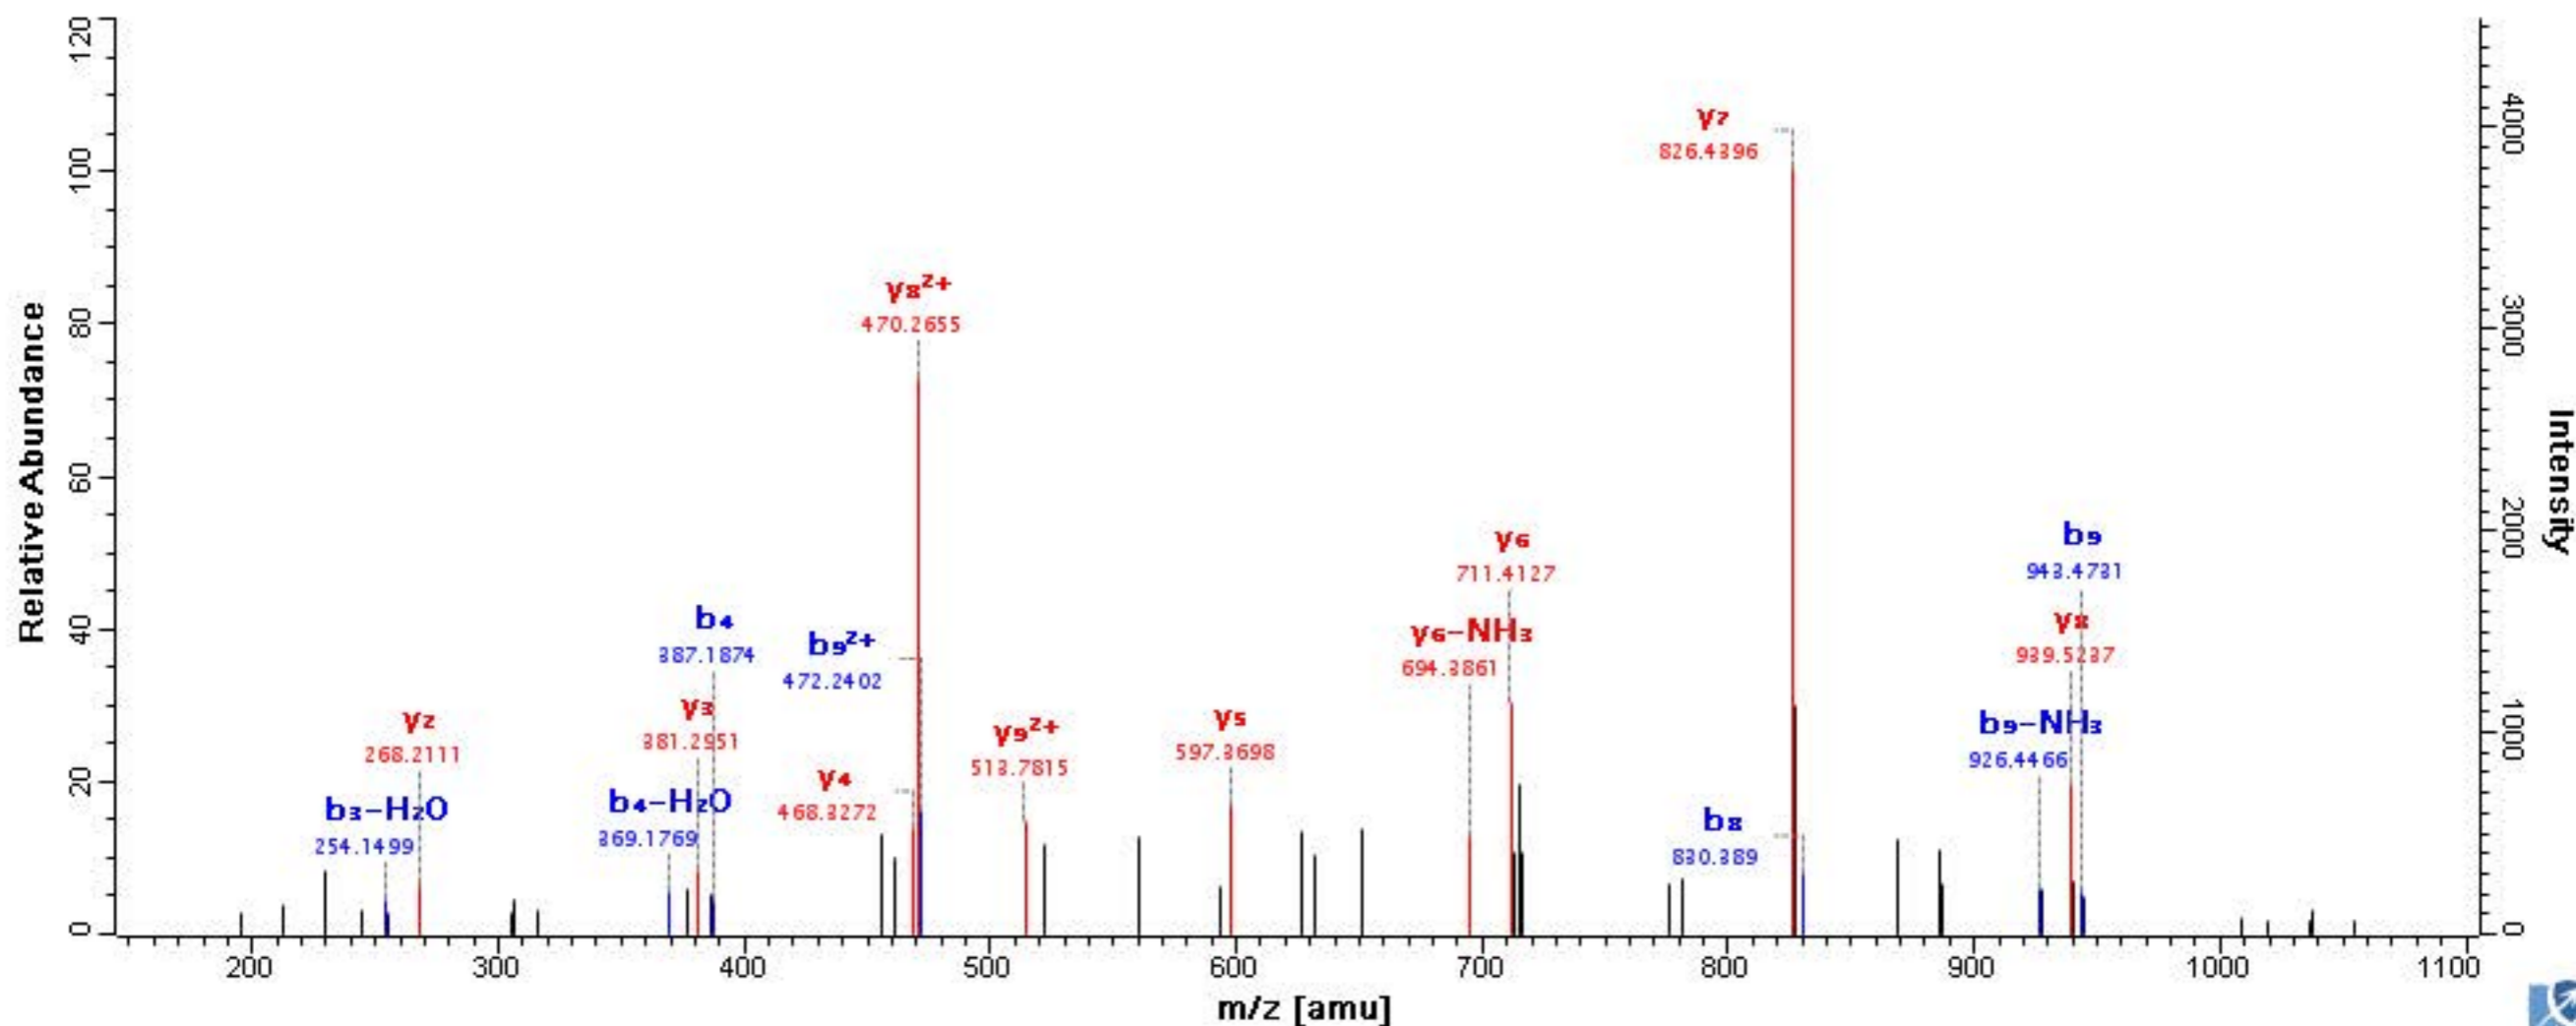

**precursor information**

|                   |                     |
|-------------------|---------------------|
| Mass:             | 1088.5701           |
| m/z:              | System.Collections. |
| Charge:           | System.Collections. |
| Retentiontime:    | System.Collections. |
| Score:            | 109.2901            |
| Mass Error [ppm]: | -1.1439             |
| PEP:              | 1.6686E-05          |
| Precursor Type:   | MULTI               |

**general information**

|                       |          |
|-----------------------|----------|
| Annotation:           | 8 of 10  |
| AminoAcids Coverage:  | 80 %     |
| Intensity Coverage:   | 55 %     |
| Protein Localisation: | 2 ... 11 |

| b <sup>2+</sup> ion |          | b ion     |          |     | γ ion |          | γ <sup>2+</sup> ion |          |           |
|---------------------|----------|-----------|----------|-----|-------|----------|---------------------|----------|-----------|
| Δ dalton            | mass     | Δ dalton  | mass     | seq |       | Δ dalton | mass                | Δ dalton | mass      |
|                     | 72.04439 |           | 72.04439 | 1   | A     |          |                     |          |           |
|                     | 159.0764 |           | 159.0764 | 2   | S     | 1026.556 |                     | 513.7815 | +0.397581 |
|                     | 272.1605 |           | 272.1605 | 3   | I     | 939.5237 | +0.227656           | 470.2655 | +0.165671 |
|                     | 387.1874 | -0.071306 | 387.1874 | 4   | D     | 826.4396 | +0.068983           | 826.4396 |           |
|                     | 501.2304 |           | 501.2304 | 5   | N     | 711.4127 | +0.043863           | 711.4127 |           |
|                     | 630.2729 |           | 630.2729 | 6   | E     | 597.3698 | +0.255614           | 597.3698 |           |
|                     | 717.305  |           | 717.305  | 7   | S     | 468.3272 | +0.208668           | 468.3272 |           |
|                     | 830.389  | +0.398071 | 830.389  | 8   | I     | 381.2951 | +0.002782           | 381.2951 |           |
| -0.497392           | 472.2402 | +0.205181 | 943.4731 | 9   | I     | 268.2111 | +0.06408            | 268.2111 |           |
|                     |          |           |          | 10  | K     | 155.127  |                     | 155.127  |           |

Source: 20120601\_VR\_Bsu\_TripleSILAC\_WTPPrkCPrpC\_GeLC\_FD4  
 Scannumber: 21953  
 Protein: BSU19340; yocR  
 Peptide Score: 160.11  
 Method: ITMS; CID; 3

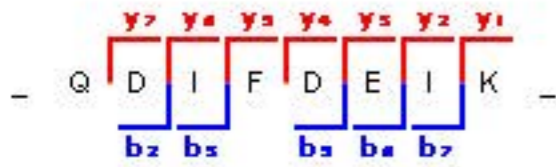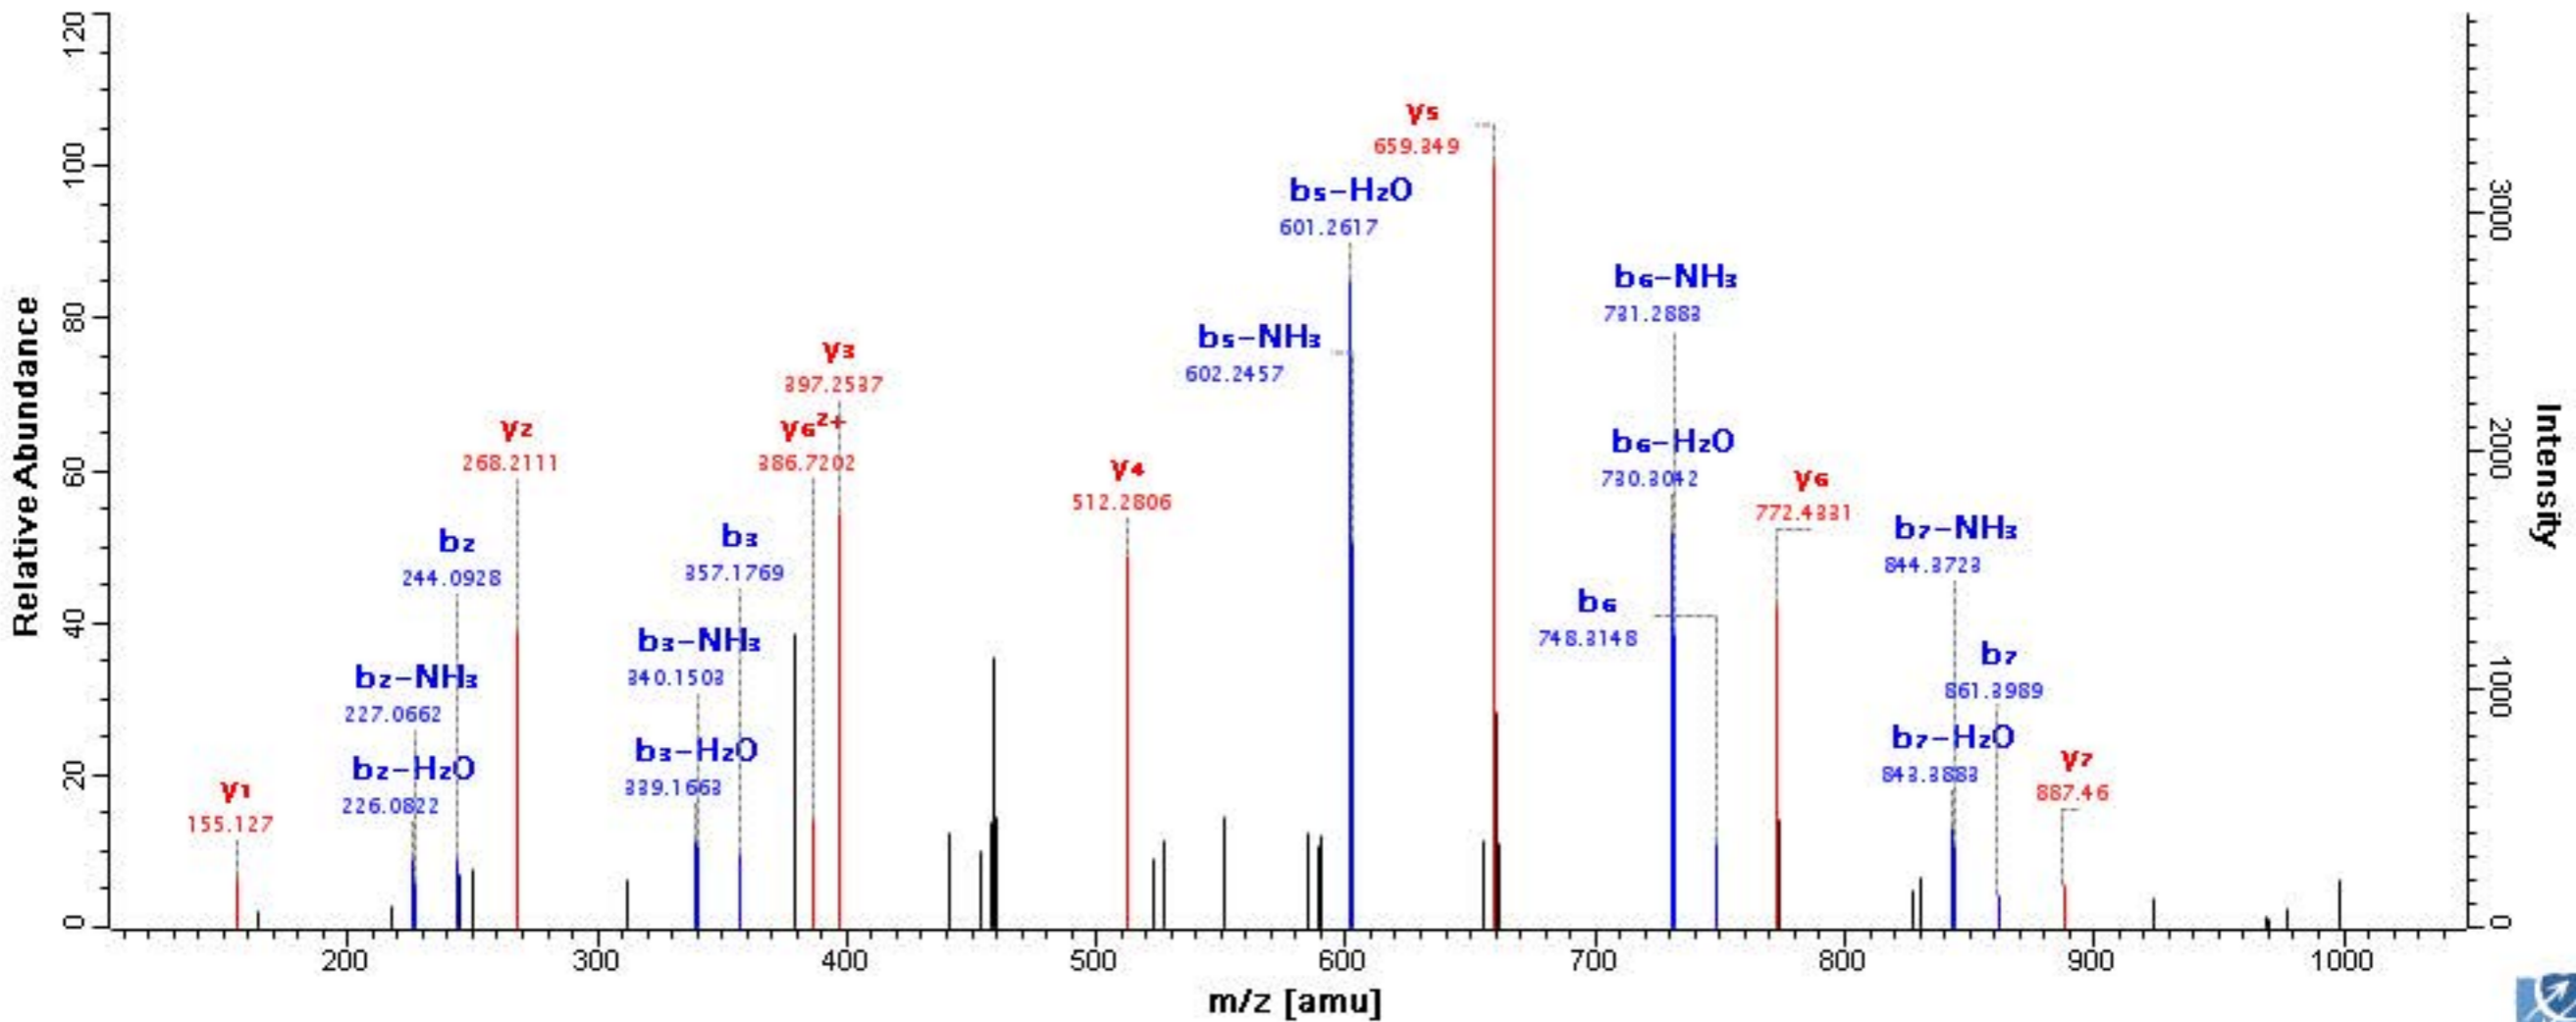

**precursor information**

|                       |                     |
|-----------------------|---------------------|
| Mass:                 | 1014.51089          |
| m/z:                  | System.Collections. |
| Charge:               | System.Collections. |
| Retentiontime:        | System.Collections. |
| Score:                | 160.1061            |
| Mass Error [ppm]:     | -0.42646            |
| g PEP:                | 6.7702E-20          |
| Annotation:           | 7 of 8              |
| AminoAcids Coverage:  | 88 %                |
| Intensity Coverage:   | 67 %                |
| Protein Localisation: | 402 ... 409         |

| b ion      |              |   |     |   | y ion        |            | y <sup>2+</sup> ion |            |
|------------|--------------|---|-----|---|--------------|------------|---------------------|------------|
| Δ dalton   | mass         |   | seq |   | Δ dalton     | mass       | Δ dalton            | mass       |
|            | 129.06585398 | 1 | Q   | 7 |              |            |                     |            |
| +0.1287148 | 244.09279701 | 2 | D   | 6 | 887.46002402 | +0.361204  | 887.46002402        |            |
| +0.1053656 | 357.17686099 | 3 | I   | 5 | 772.43308099 | +0.0243165 | 386.72017873        | -0.0203496 |
|            | 504.24527491 | 4 | F   | 4 | 659.34901701 | +0.0063907 | 659.34901701        |            |
|            | 619.27221794 | 5 | D   | 3 | 512.28060309 | -0.0275513 | 512.28060309        |            |
| +0.1211021 | 748.31481103 | 6 | E   | 2 | 397.25366006 | -0.0252055 | 397.25366006        |            |
| +0.2546284 | 861.39887502 | 7 | I   | 1 | 268.21106696 | +0.0383227 | 268.21106696        |            |
|            |              | 8 | K   | 0 | 155.12700298 | +0.0842244 | 155.12700298        |            |

Source: 201 20601\_VR\_Bsu\_TripleSILAC\_WTPPrkCPrpC\_GeLC\_FD6  
 Scannumber: 14655  
 Protein: BSU24980; yqgH; yzmC  
 Peptide Score: 63.68  
 Method: ITMS; CID; 3

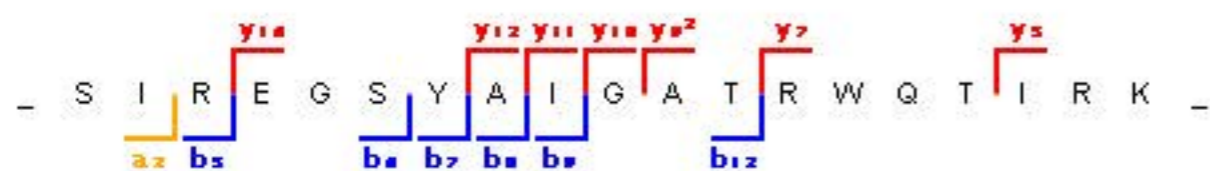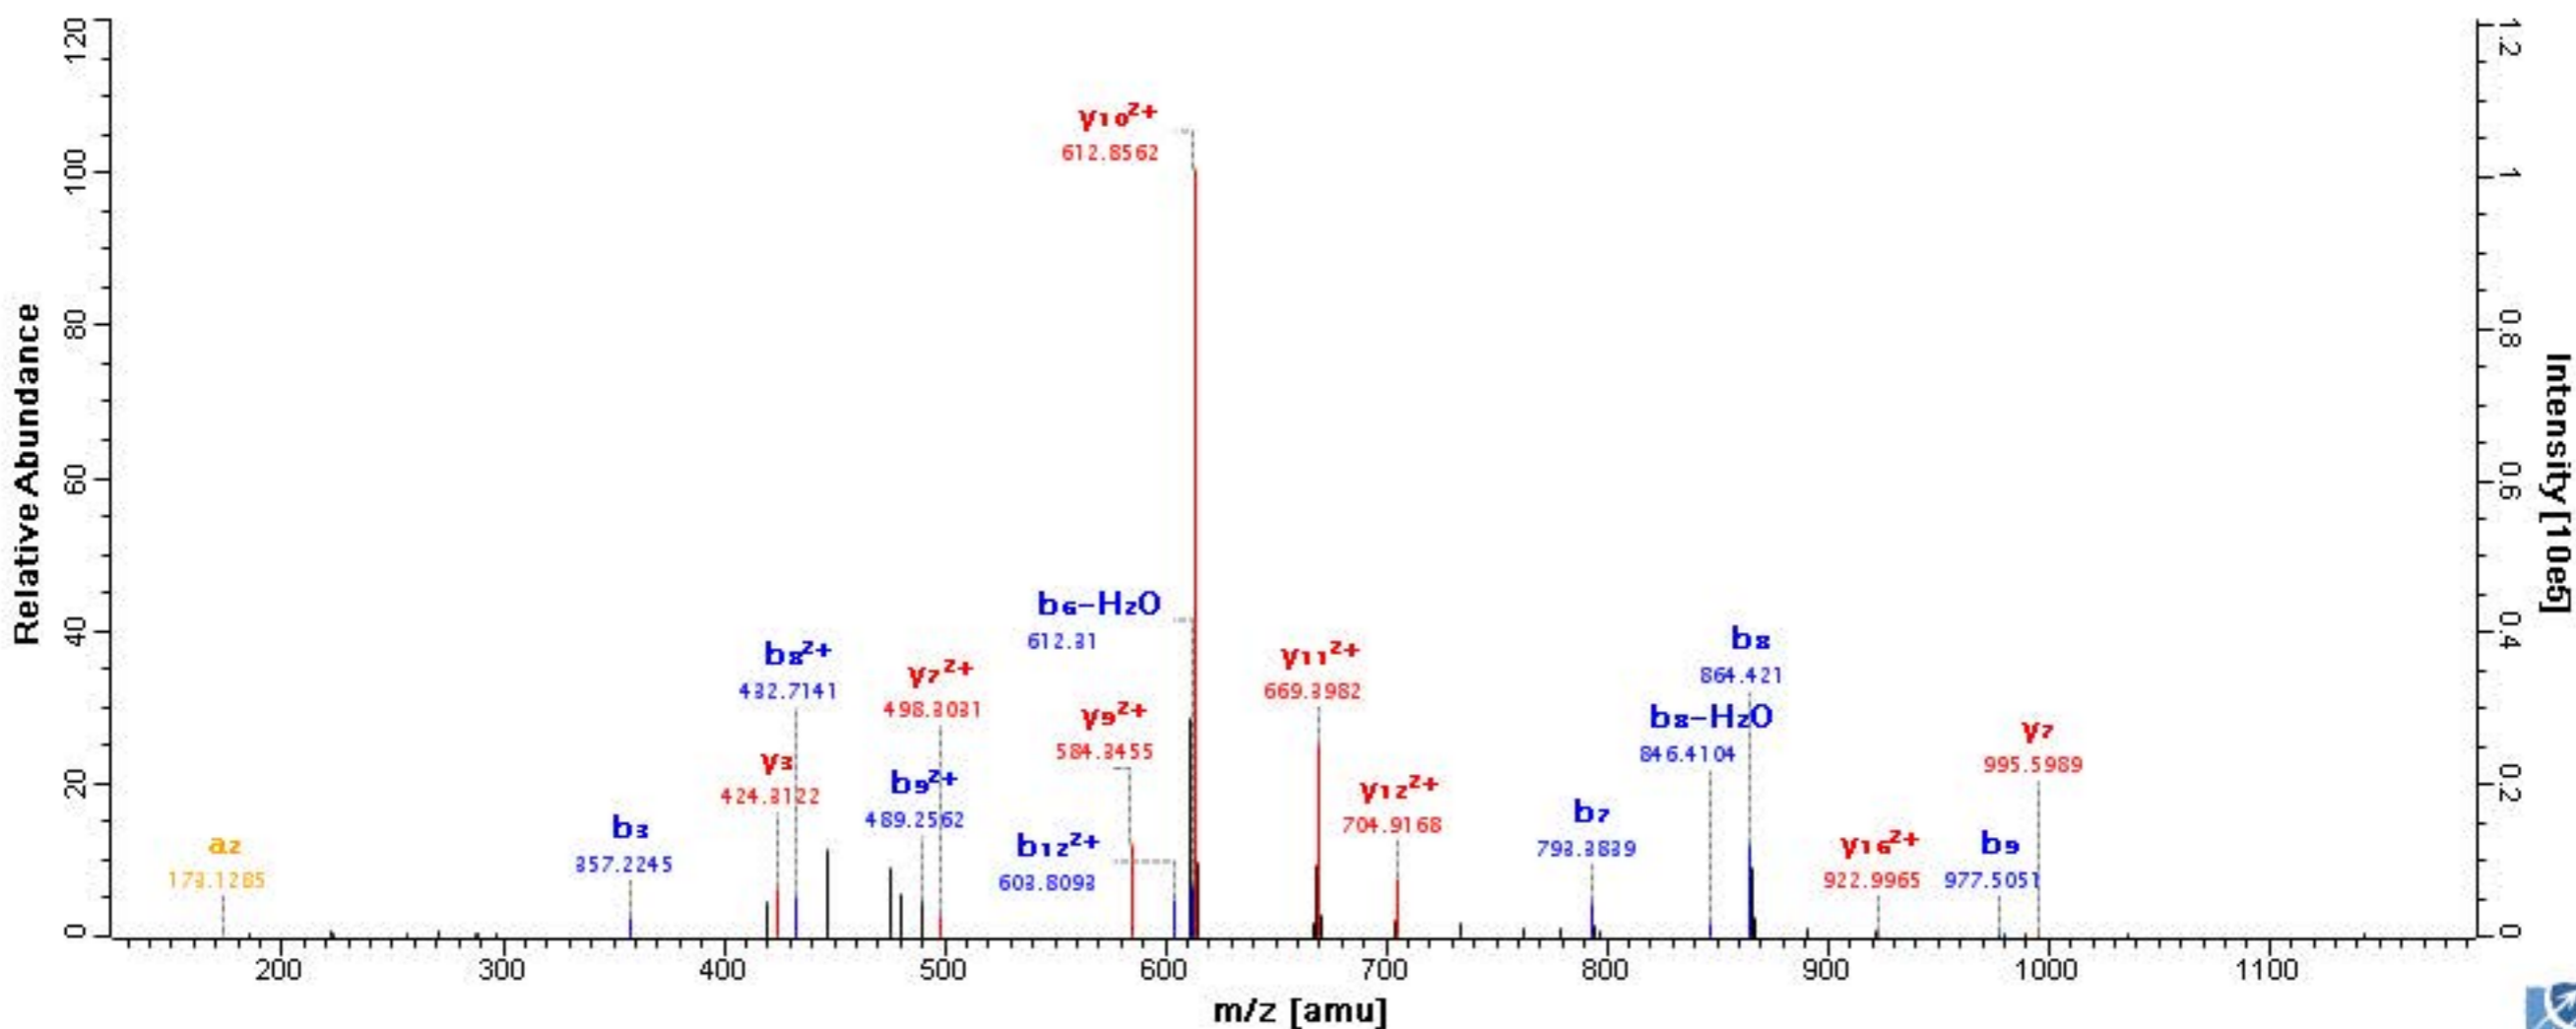

#### precursor information

|                   |                     |
|-------------------|---------------------|
| Mass:             | 2192.18274          |
| m/z:              | System.Collections. |
| Charge:           | System.Collections. |
| Retentiontime:    | System.Collections. |
| Score:            | 63.68069            |
| Mass Error [ppm]: | 0.59222             |
| PEP:              | 0.00045821          |
| Precursor Type:   | MULTI               |

| a ion    |         | b <sup>2+</sup> ion |         | b ion    |         |    |     | y ion |          | y <sup>2+</sup> ion |          |         |
|----------|---------|---------------------|---------|----------|---------|----|-----|-------|----------|---------------------|----------|---------|
| Δ dalton | mass    | Δ dalton            | mass    | Δ dalton | mass    |    | seq |       | Δ dalton | mass                | Δ dalton | mass    |
|          | 60.0444 |                     | 88.0393 |          | 88.0393 | 1  | S   | 18    |          |                     |          |         |
| +0.14788 | 173.128 |                     | 201.123 |          | 201.123 | 2  | I   | 17    | 2114.17  |                     | 2114.17  |         |
|          | 329.23  |                     | 357.224 | +0.05268 | 357.224 | 3  | R   | 16    | 2001.09  |                     | 2001.09  |         |
|          | 458.272 |                     | 486.267 |          | 486.267 | 4  | E   | 15    | 1844.99  |                     | 922.996  | -0.3499 |
|          | 515.294 |                     | 543.289 |          | 543.289 | 5  | G   | 14    | 1715.94  |                     | 1715.94  |         |
|          | 602.326 |                     | 630.321 |          | 630.321 | 6  | S   | 13    | 1658.92  |                     | 1658.92  |         |
|          | 765.389 |                     | 793.384 | +0.1714  | 793.384 | 7  | Y   | 12    | 1571.89  |                     | 1571.89  |         |
|          | 836.426 | +0.13632            | 864.421 | +0.21663 | 864.421 | 8  | A   | 11    | 1408.83  |                     | 704.917  | +0.3130 |
|          | 949.51  | +0.06737            | 977.505 | +0.21203 | 977.505 | 9  | I   | 10    | 1337.79  |                     | 669.398  | +0.3127 |
|          | 1006.53 |                     | 1034.53 |          | 1034.53 | 10 | G   | 9     | 1224.71  |                     | 612.856  | +0.3164 |
|          | 1077.57 |                     | 1105.56 |          | 1105.56 | 11 | A   | 8     | 1167.68  |                     | 584.345  | +0.2550 |
|          | 1178.62 | +0.20925            | 1206.61 |          | 1206.61 | 12 | T   | 7     | 1096.65  |                     | 1096.65  |         |
|          | 1334.72 |                     | 1362.71 |          | 1362.71 | 13 | R   | 6     | 995.599  | +0.1335             | 498.303  | +0.2509 |
|          | 1520.8  |                     | 1548.79 |          | 1548.79 | 14 | W   | 5     | 839.498  |                     | 839.498  |         |
|          | 1648.86 |                     | 1676.85 |          | 1676.85 | 15 | Q   | 4     | 653.418  |                     | 653.418  |         |
|          | 1749.9  |                     | 1777.9  |          | 1777.9  | 16 | T   | 3     | 525.36   |                     | 525.36   |         |
|          | 1862.99 |                     | 1890.98 |          | 1890.98 | 17 | I   | 2     | 424.312  | -0.3879             | 424.312  |         |
|          | 2019.09 |                     | 2047.08 |          | 2047.08 | 18 | R   | 1     | 311.228  |                     | 311.228  |         |
|          |         |                     |         |          |         | 19 | K   | 0     | 155.127  |                     | 155.127  |         |

#### general information

|                       |             |
|-----------------------|-------------|
| Annotation:           | 12 of 19    |
| AminoAcids Coverage:  | 63 %        |
| Intensity Coverage:   | 63 %        |
| Protein Localisation: | 194 ... 212 |

Source: 20120601\_VR\_Bsu\_TripleSILAC\_WTPPrkCPrpC\_GeLC\_F11  
 Scannumber: 10834  
 Protein: BSU17950; ccdC; yneJ; yoxI  
 Peptide Score: 210.79  
 Method: ITMS; CID; 3

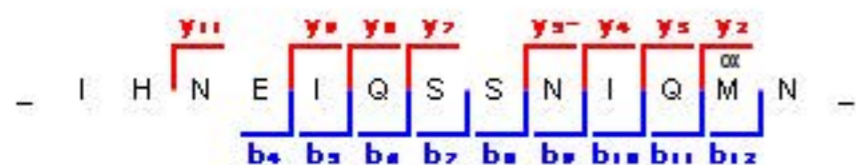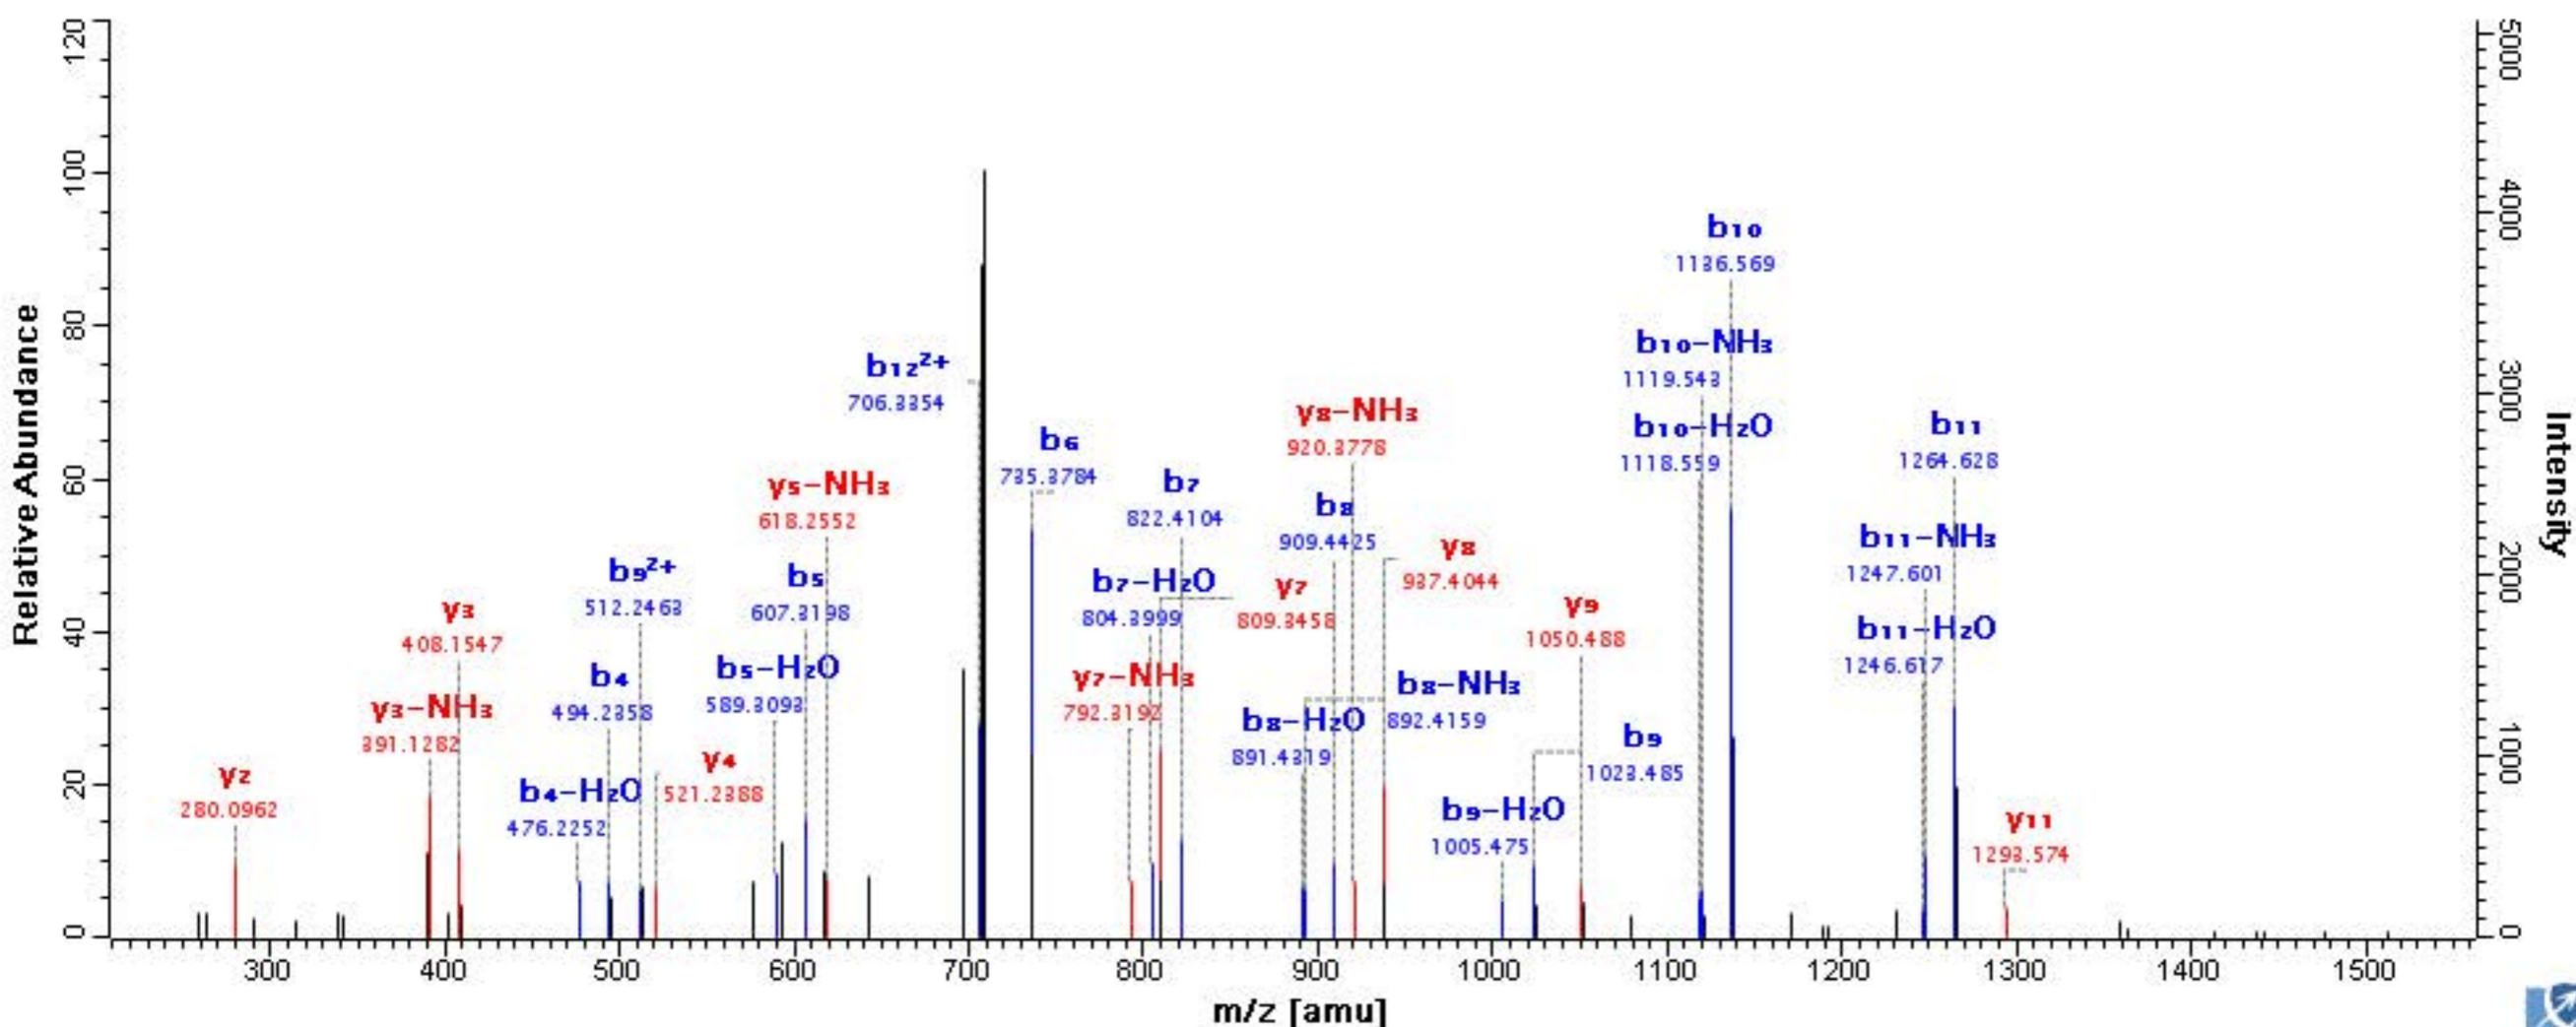

**precursor information**

|                   |                     |
|-------------------|---------------------|
| Mass:             | 1542.70884          |
| m/z:              | System.Collections. |
| Charge:           | System.Collections. |
| Retentiontime:    | System.Collections. |
| Score:            | 210.7892            |
| Mass Error [ppm]: | -0.52736            |
| PEP:              | 3.2071E-151         |
| Precursor Type:   | ISO                 |

**general information**

|                       |             |
|-----------------------|-------------|
| Annotation:           | 10 of 13    |
| AminoAcids Coverag    | 77 %        |
| Intensity Coverage:   | 50 %        |
| Protein Localisation: | 148 ... 160 |

| b <sup>2+</sup> ion |              | b ion      |              |     | y ion    |      |
|---------------------|--------------|------------|--------------|-----|----------|------|
| Δ dalton            | mass         | Δ dalton   | mass         | seq | Δ dalton | mass |
|                     | 114.09134045 |            | 114.09134045 | 1   | I        | 12   |
|                     | 251.15025231 |            | 251.15025231 | 2   | H        | 11   |
|                     | 365.19317976 |            | 365.19317976 | 3   | N        | 10   |
|                     | 494.23577285 | +0.1236021 | 494.23577285 | 4   | E        | 9    |
|                     | 607.31983683 | +0.0541256 | 607.31983683 | 5   | I        | 8    |
|                     | 735.37841434 | +0.0329626 | 735.37841434 | 6   | Q        | 7    |
|                     | 822.41044275 | +0.0074039 | 822.41044275 | 7   | S        | 6    |
|                     | 909.44247116 | +0.0027803 | 909.44247116 | 8   | S        | 5    |
| +0.0977787          | 512.24633754 | +0.1534564 | 1023.4853986 | 9   | N        | 4    |
|                     | 1136.5694626 | +0.1021683 | 1136.5694626 | 10  | I        | 3    |
|                     | 1264.6280401 | +0.2149775 | 1264.6280401 | 11  | Q        | 2    |
| +0.2632139          | 706.3353579  |            | 1411.6634393 | 12  | M        | 1    |
|                     |              |            |              | 13  | N        | 0    |

Source: 20120601\_VR\_Bsu\_TripleSILAC\_WTPkCPrpC\_GeLC\_F14  
 Scannumber: 12061  
 Protein: bdbB; BSU21440; yolk  
 Peptide Score: 148.18  
 Method: ITMS; CID; 3

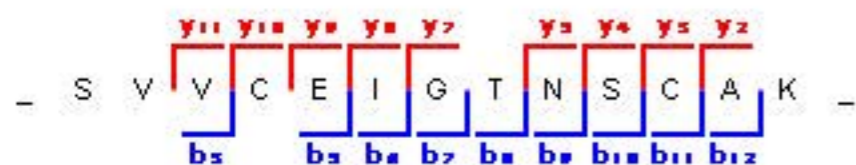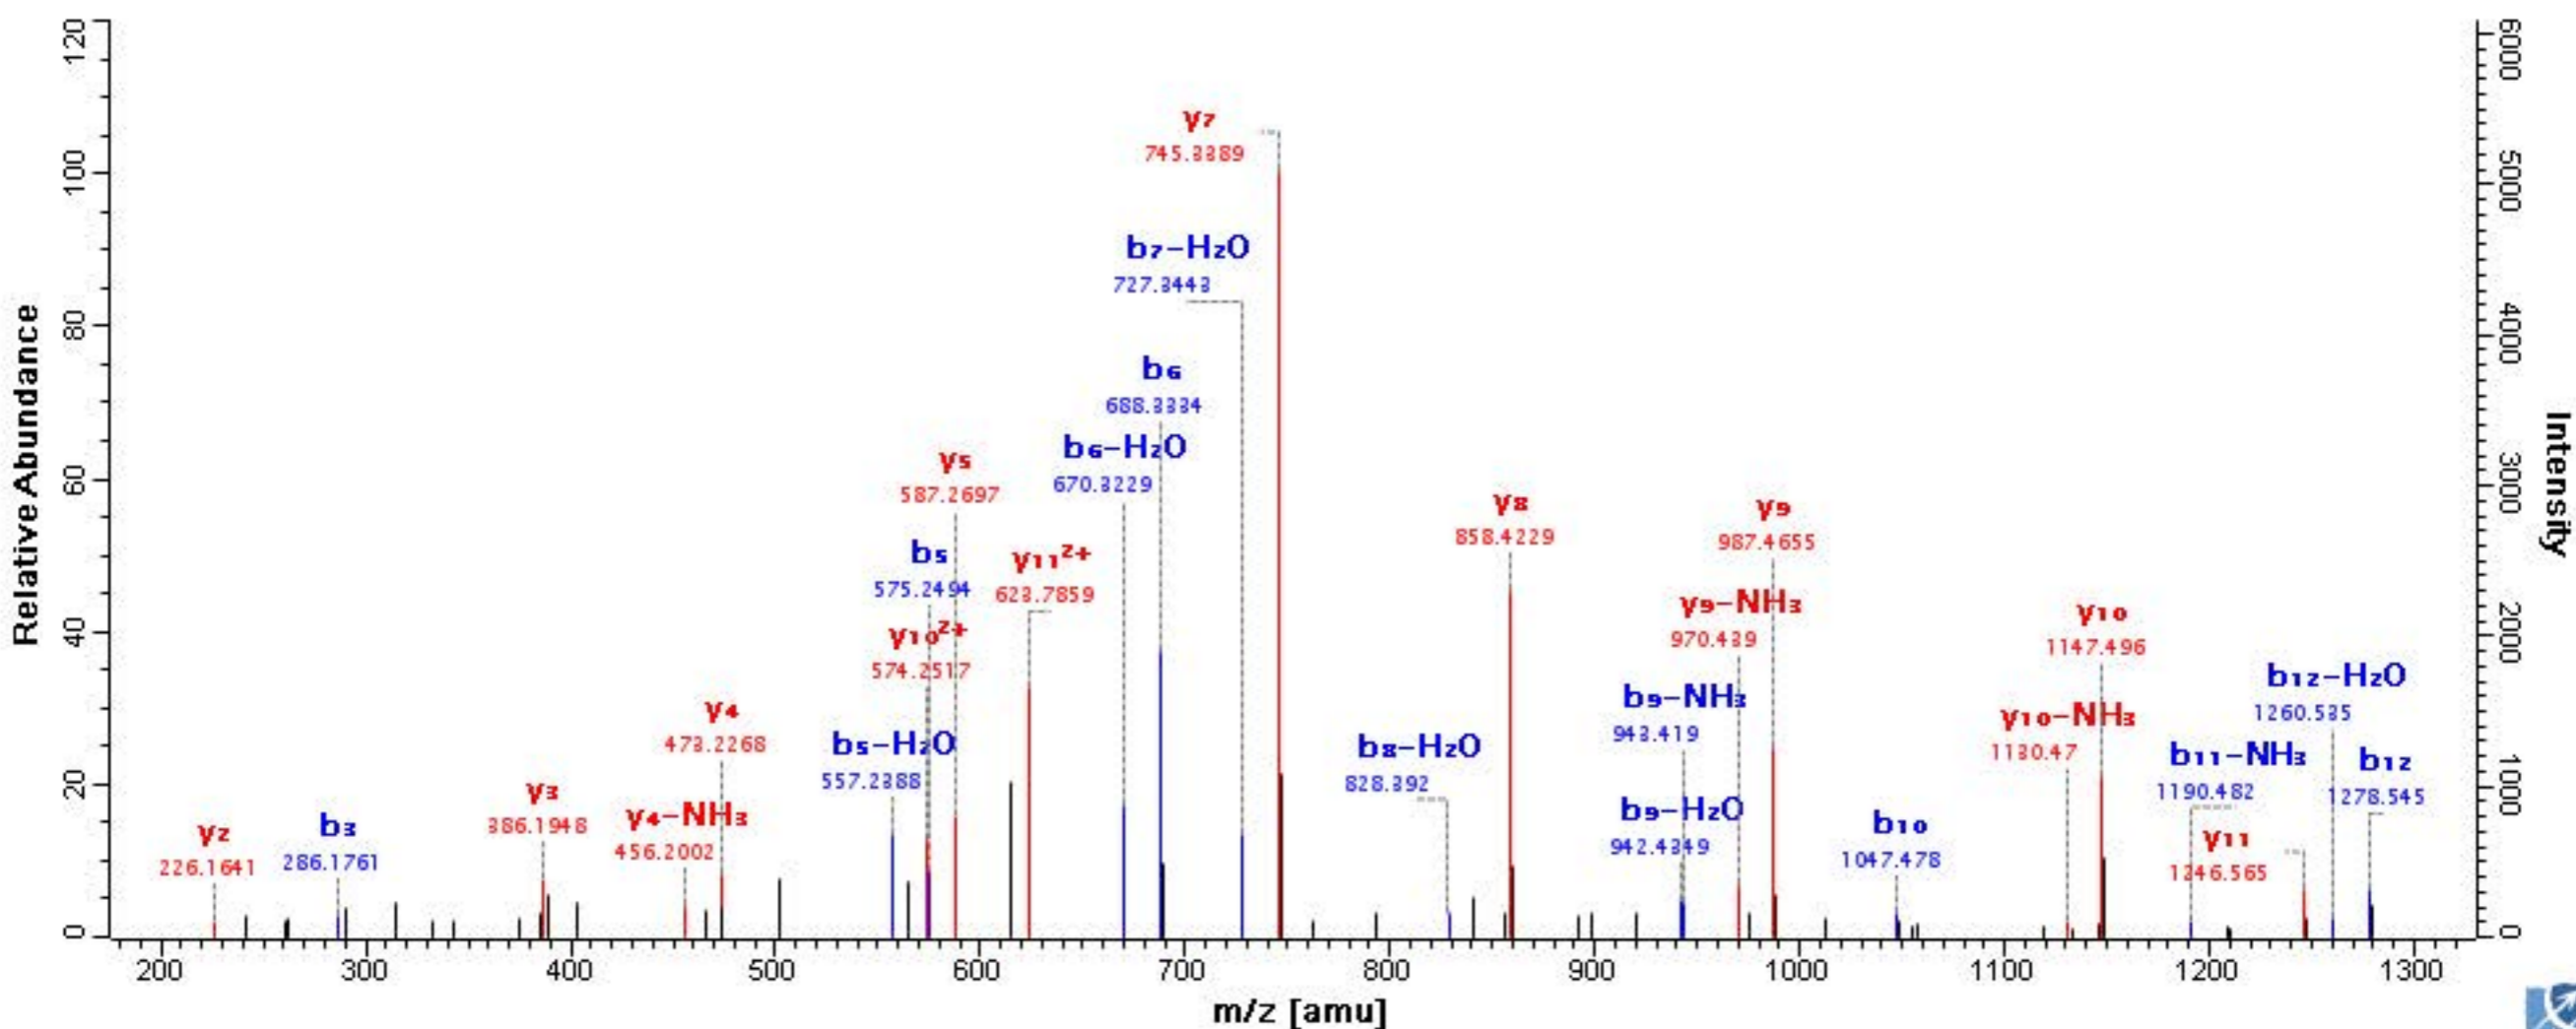

#### precursor information

|                   |                     |
|-------------------|---------------------|
| Mass:             | 1431.65779          |
| m/z:              | System.Collections. |
| Charge:           | System.Collections. |
| Retentiontime:    | System.Collections. |
| Score:            | 148.1832            |
| Mass Error [ppm]: | 0.031506            |
| PEP:              | 4.2653E-26          |
| Precursor Type:   | ISO                 |

#### general information

|                       |            |
|-----------------------|------------|
| Annotation:           | 10 of 13   |
| AminoAcids Coverag    | 77 %       |
| Intensity Coverage:   | 68 %       |
| Protein Localisation: | 92 ... 104 |

| b ion      |              |    |     |    | y ion        |            | y <sup>2+</sup> ion |            |
|------------|--------------|----|-----|----|--------------|------------|---------------------|------------|
| Δ dalton   | mass         |    | seq |    | Δ dalton     | mass       | Δ dalton            | mass       |
|            | 88.039304876 | 1  | S   | 12 |              |            |                     |            |
|            | 187.10771879 | 2  | V   | 11 | 1345.6329961 |            | 1345.6329961        |            |
| +0.141067  | 286.17613271 | 3  | V   | 10 | 1246.5645822 | +0.0342947 | 623.78592934        | -0.0417887 |
|            | 446.20678091 | 4  | C   | 9  | 1147.4961683 | +0.094652  | 574.25172239        | -0.2395154 |
| -0.0501553 | 575.24937401 | 5  | E   | 8  | 987.4655201  | +0.0216625 | 987.4655201         |            |
| +0.1475801 | 688.33343799 | 6  | I   | 7  | 858.42292701 | -0.0813132 | 858.42292701        |            |
|            | 745.35490171 | 7  | G   | 6  | 745.33886303 | -0.0256306 | 745.33886303        |            |
|            | 846.40258018 | 8  | T   | 5  | 688.3173993  |            | 688.3173993         |            |
|            | 960.44550763 | 9  | N   | 4  | 587.26972083 | +0.0501644 | 587.26972083        |            |
| +0.0448028 | 1047.477536  | 10 | S   | 3  | 473.22679338 | +0.117567  | 473.22679338        |            |
|            | 1207.5081842 | 11 | C   | 2  | 386.19476497 | +0.0209333 | 386.19476497        |            |
| -0.1344094 | 1278.545298  | 12 | A   | 1  | 226.16411677 | -0.1666802 | 226.16411677        |            |
|            |              | 13 | K   | 0  | 155.12700298 |            | 155.12700298        |            |

Source: 20120601\_VR\_Bsu\_TripleSILAC\_WTPPrkCPrpC\_GeLC\_F14  
 Scannumber: 23661  
 Protein: atpB; BSU36870  
 Peptide Score: 151.98  
 Method: ITMS; CID; 3

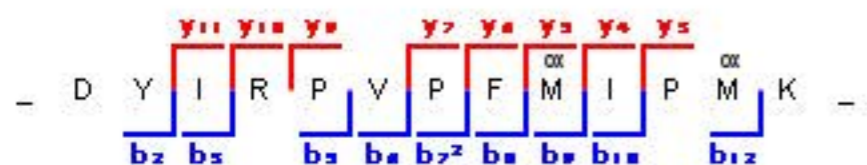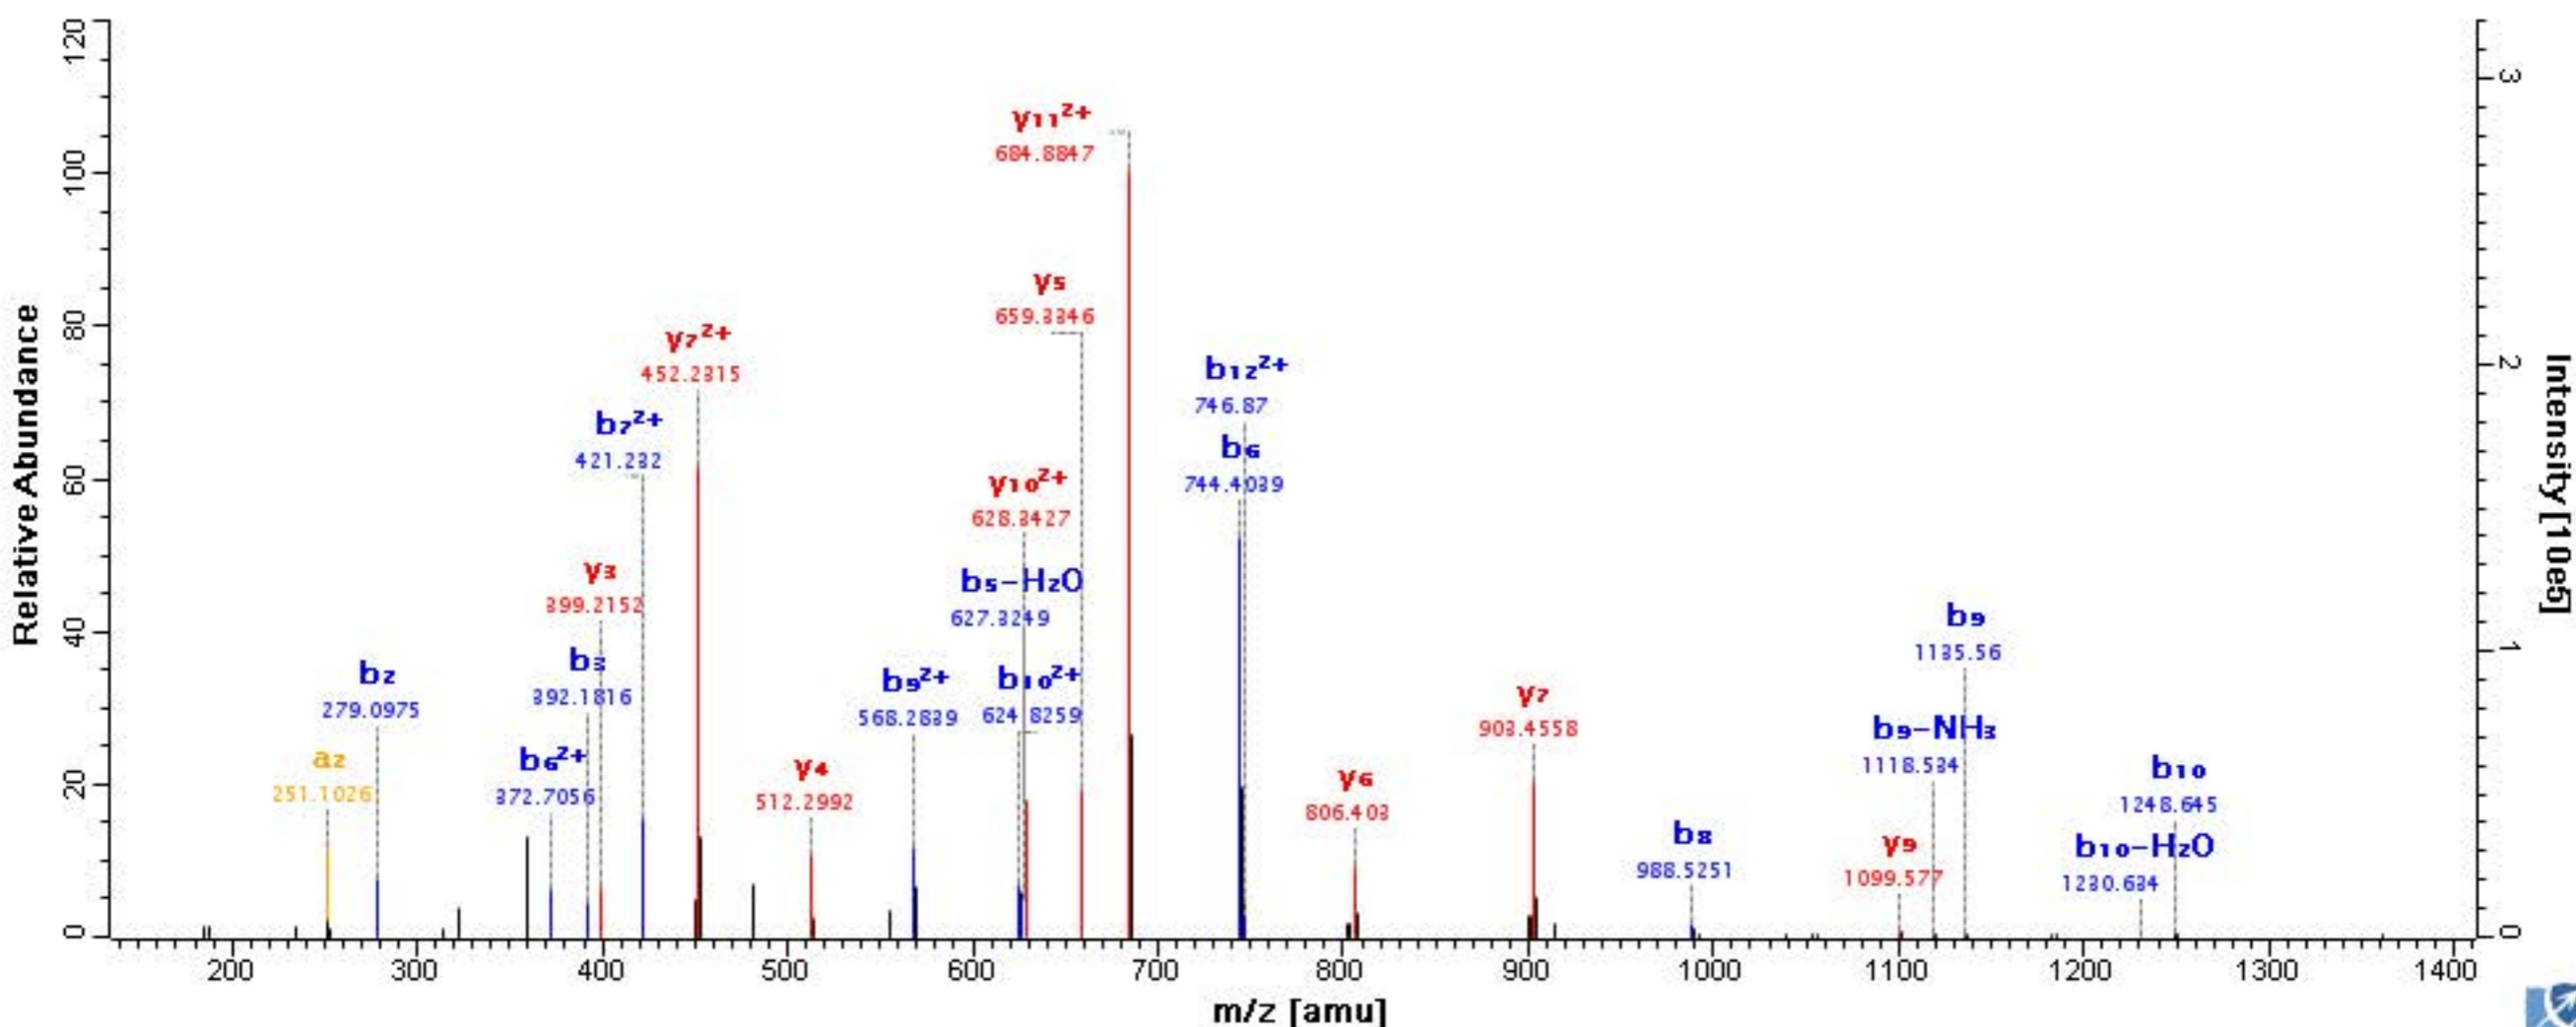

#### precursor information

|                   |                     |
|-------------------|---------------------|
| Mass:             | 0                   |
| m/z:              | System.Collections. |
| Charge:           | System.Collections. |
| Retentiontime:    | System.Collections. |
| Score:            | 151.9761            |
| Mass Error [ppm]: | -0.47648            |
| PEP:              | 6.2859E-55          |
| Precursor Type:   | PEAK                |

#### general information

|                       |             |
|-----------------------|-------------|
| Annotation:           | 11 of 13    |
| AminoAcids Coverage:  | 85 %        |
| Intensity Coverage:   | 64 %        |
| Protein Localisation: | 143 ... 155 |

| a ion    |         | b <sup>2+</sup> ion |         | b ion    |         |    |     | y ion |          | y <sup>2+</sup> ion |          |          |
|----------|---------|---------------------|---------|----------|---------|----|-----|-------|----------|---------------------|----------|----------|
| Δ dalton | mass    | Δ dalton            | mass    | Δ dalton | mass    |    | seq |       | Δ dalton | mass                | Δ dalton | mass     |
|          | 88.0393 |                     | 116.034 |          | 116.034 | 1  | D   | 12    |          |                     |          |          |
| -0.0306  | 251.103 |                     | 279.098 | -0.0072  | 279.098 | 2  | Y   | 11    | 1531.83  |                     | 1531.83  |          |
|          | 364.187 |                     | 392.182 | +0.0367  | 392.182 | 3  | I   | 10    | 1368.76  |                     | 684.885  | +0.0579: |
|          | 520.288 |                     | 548.283 |          | 548.283 | 4  | R   | 9     | 1255.68  |                     | 628.343  | +0.27639 |
|          | 617.341 |                     | 645.335 |          | 645.335 | 5  | P   | 8     | 1099.58  | +0.15812            | 1099.58  |          |
|          | 716.409 | +0.04289            | 72.706  | +0.13156 | 744.404 | 6  | V   | 7     | 1002.52  |                     | 1002.52  |          |
|          | 813.462 | +0.04488            | 421.232 |          | 841.457 | 7  | P   | 6     | 903.456  | +0.10266            | 6452.232 | +0.0714: |
|          | 960.53  |                     | 988.525 | +0.18128 | 988.525 | 8  | F   | 5     | 806.403  | +0.12778            | 806.403  |          |
|          | 1107.57 | +0.03363            | 568.284 | +0.26057 | 1135.56 | 9  | M   | 4     | 659.335  | +0.06662            | 659.335  |          |
|          | 1220.65 | +0.15145            | 624.826 | +0.23095 | 1248.64 | 10 | I   | 3     | 512.299  | +0.09939            | 512.299  |          |
|          | 1317.7  |                     | 1345.7  |          | 1345.7  | 11 | P   | 2     | 399.215  | +0.08739            | 399.215  |          |
|          | 1464.74 | +0.22364            | 746.87  |          | 1492.73 | 12 | M   | 1     | 302.162  |                     | 302.162  |          |
|          |         |                     |         |          |         | 13 | K   | 0     | 155.127  |                     | 155.127  |          |

Source: 201 20601\_VR\_Bsu\_TripleSILAC\_WTPPrkCPrpC\_GeLC\_F1 6  
 Scannumber: 20538  
 Protein: BSU1 2069; yjzH  
 Peptide Score: 135.99  
 Method: ITMS; CID; 3

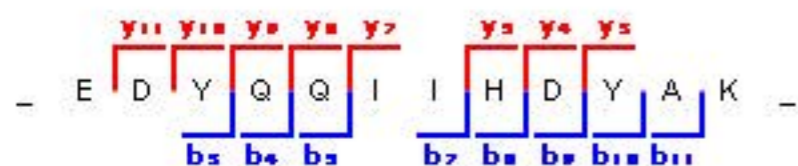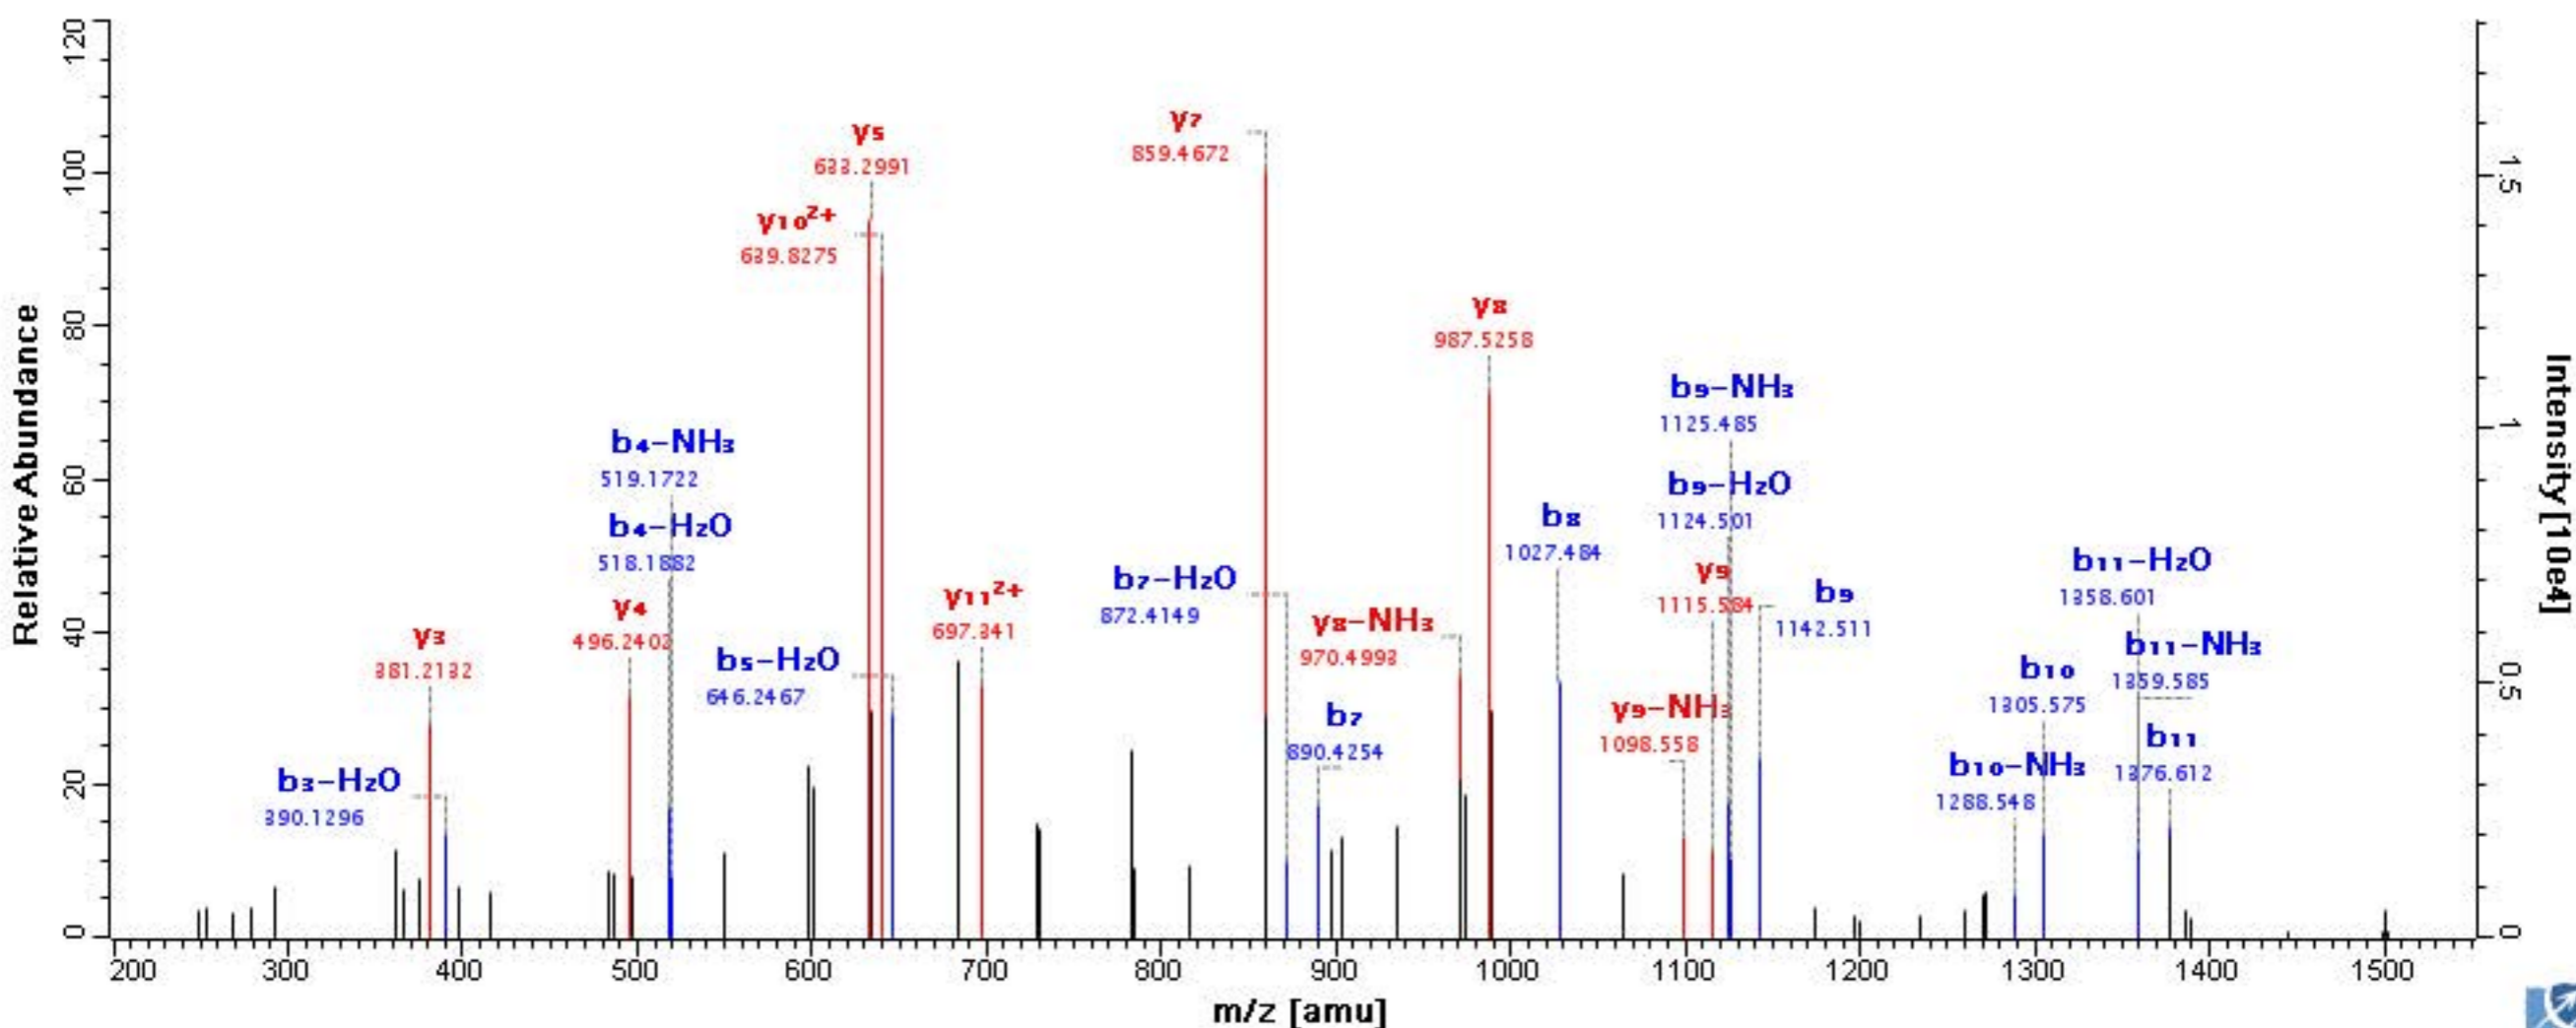

#### precursor information

|                   |                     |
|-------------------|---------------------|
| Mass:             | 1521.7086           |
| m/z:              | System.Collections. |
| Charge:           | System.Collections. |
| Retentiontime:    | System.Collections. |
| Score:            | 135.9866            |
| Mass Error [ppm]: | -0.90106            |
| PEP:              | 1.9687E-16          |
| Precursor Type:   | MULTI               |

#### general information

|                       |           |
|-----------------------|-----------|
| Annotation:           | 10 of 12  |
| AminoAcids Coverage:  | 83 %      |
| Intensity Coverage:   | 60 %      |
| Protein Localisation: | 20 ... 31 |

| b ion      |              |    |     |    | gamma ion    |            | gamma <sup>2+</sup> ion |            |
|------------|--------------|----|-----|----|--------------|------------|-------------------------|------------|
| Δ dalton   | mass         |    | seq |    | Δ dalton     | mass       | Δ dalton                | mass       |
|            | 130.04986956 | 1  | E   | 11 |              |            |                         |            |
|            | 245.07681259 | 2  | D   | 10 | 1393.6746559 |            | 697.34096621            | +0.2408819 |
|            | 408.14014113 | 3  | Y   | 9  | 1278.6477129 |            | 639.82749469            | +0.0582475 |
|            | 536.19871864 | 4  | Q   | 8  | 1115.5843844 | +0.0364652 | 1115.5843844            |            |
|            | 664.25729616 | 5  | Q   | 7  | 987.52580686 | +0.0643421 | 987.52580686            |            |
|            | 777.34136014 | 6  | I   | 6  | 859.46722935 | +0.0498605 | 859.46722935            |            |
| +0.0486359 | 890.42542412 | 7  | I   | 5  | 746.38316537 |            | 746.38316537            |            |
| +0.0342187 | 1027.484336  | 8  | H   | 4  | 633.29910139 | -0.0157762 | 633.29910139            |            |
| +0.1981936 | 1142.511279  | 9  | D   | 3  | 496.24018953 | -0.0195474 | 496.24018953            |            |
| +0.2045673 | 1305.5746075 | 10 | Y   | 2  | 381.2132465  | -0.063039  | 381.2132465             |            |
| +0.1175267 | 1376.6117213 | 11 | A   | 1  | 218.14991796 |            | 218.14991796            |            |
|            |              | 12 | K   | 0  | 147.11280417 |            | 147.11280417            |            |



Source: 20120601\_VR\_Bsu\_TripleSILAC\_WTPPrkCPrpC\_GeLC\_F16  
 Scannumber: 24698  
 Protein: BSU40010; S14D; yxaD  
 Peptide Score: 68  
 Method: ITMS; CID; 3

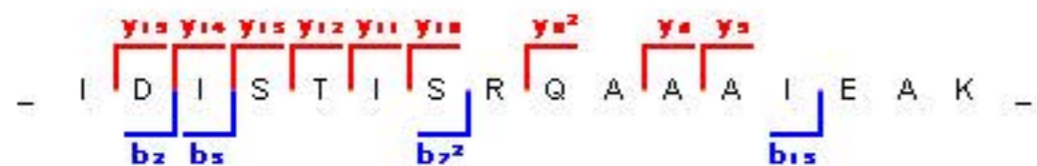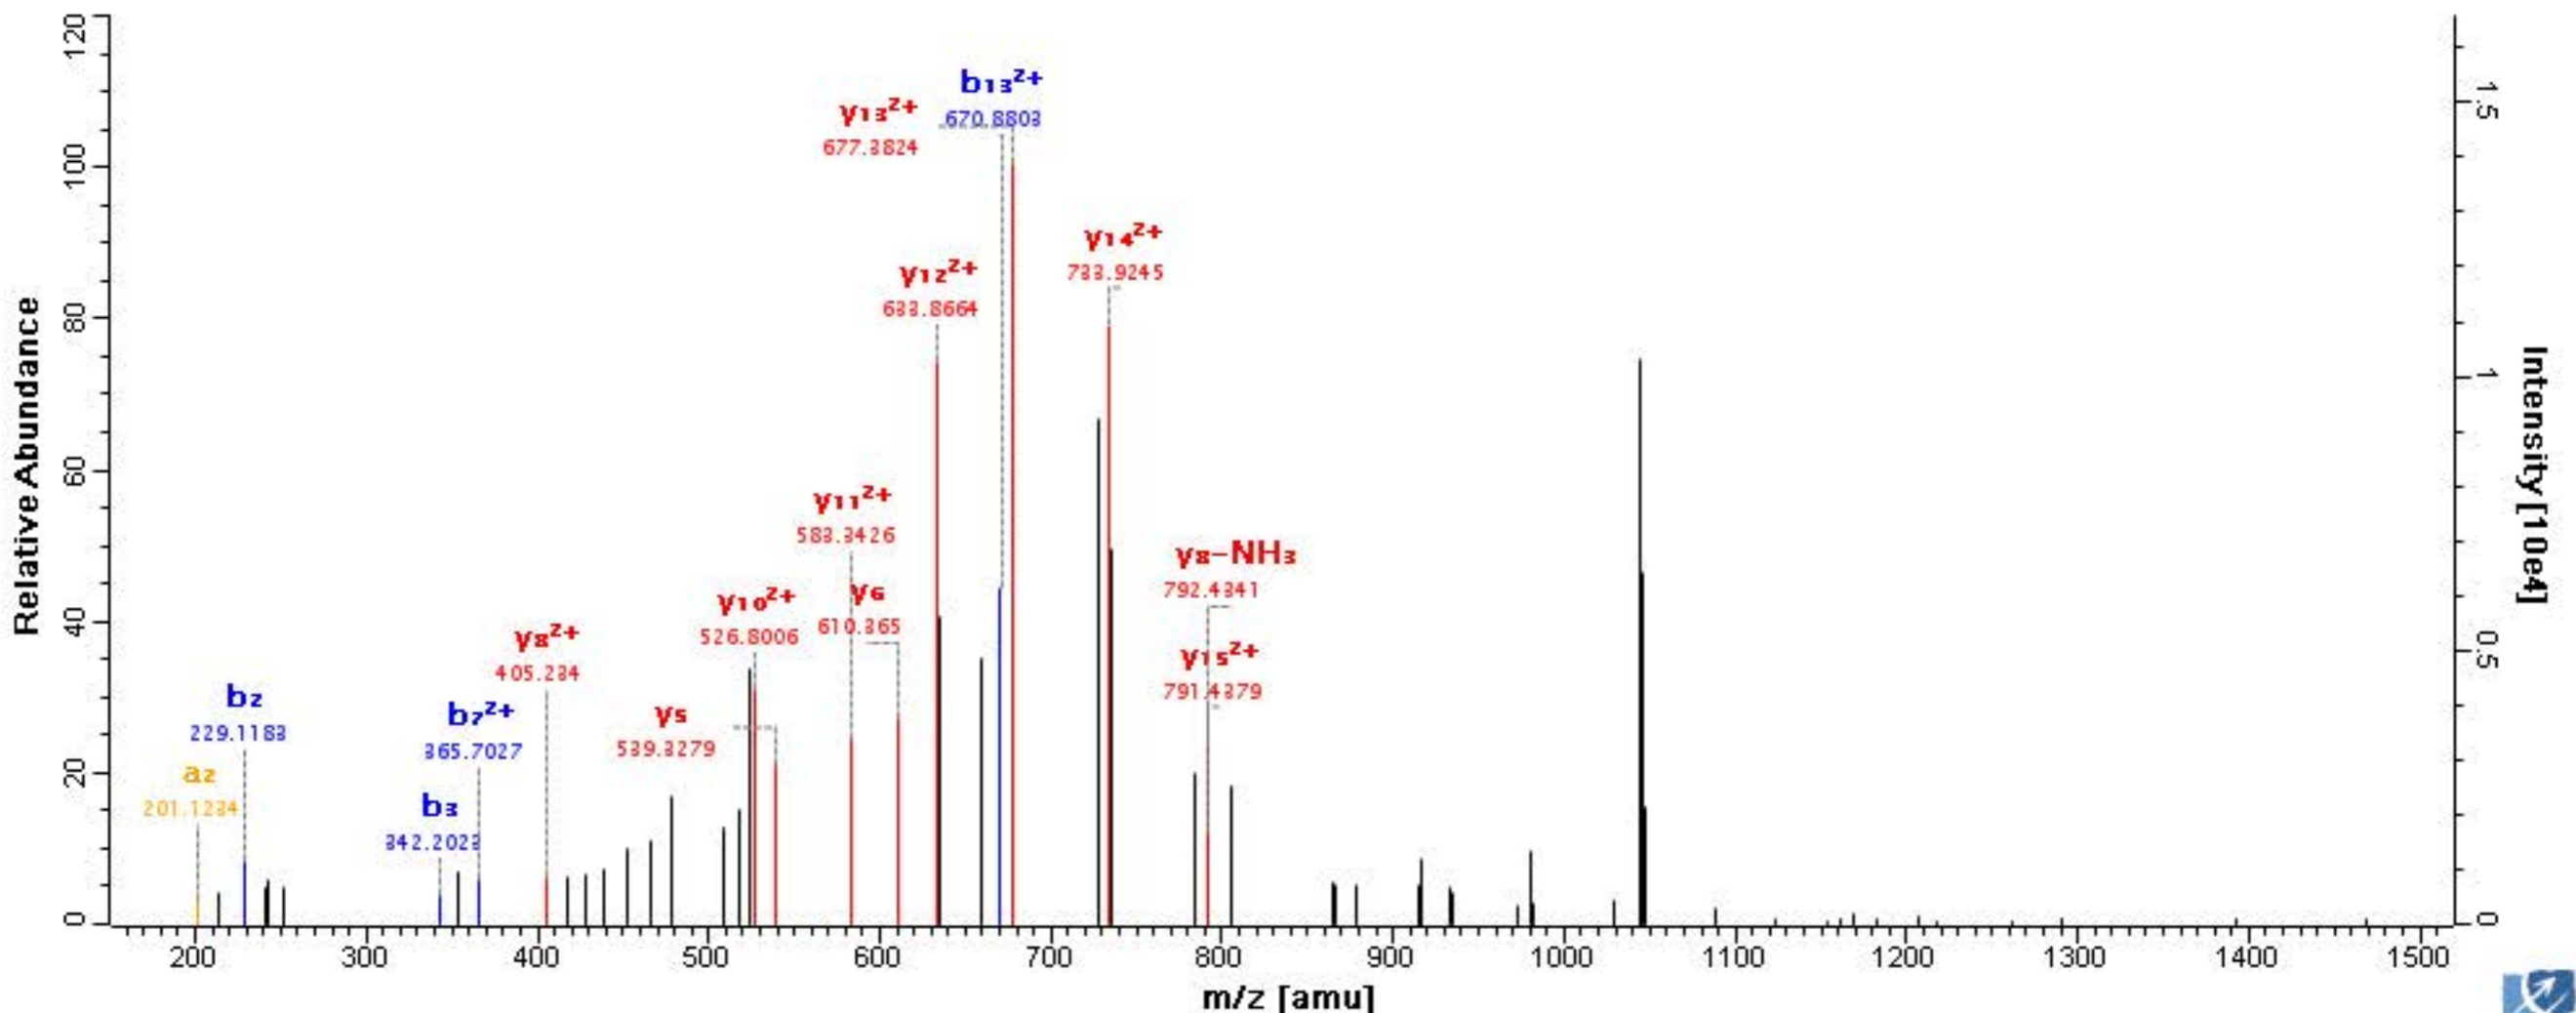

#### precursor information

|                   |                     |
|-------------------|---------------------|
| Mass:             | 1685.92989          |
| m/z:              | System.Collections. |
| Charge:           | System.Collections. |
| Retentiontime:    | System.Collections. |
| Score:            | 67.99693            |
| Mass Error [ppm]: | -0.77245            |
| PEP:              | 0.00038885          |
| Precursor Type:   | MULTI               |

| a ion    |         | b <sup>2+</sup> ion |         | b ion    |         |    |     |    | γ ion    |         | γ <sup>2+</sup> ion |      |
|----------|---------|---------------------|---------|----------|---------|----|-----|----|----------|---------|---------------------|------|
| Δ dalton | mass    | Δ dalton            | mass    | Δ dalton | mass    |    | seq |    | Δ dalton | mass    | Δ dalton            | mass |
|          | 86.0964 |                     | 114.091 |          | 114.091 | 1  | I   | 15 |          |         |                     |      |
| +0.13237 | 201.123 |                     | 229.118 | +0.07253 | 229.118 | 2  | D   | 14 | 1581.87  | 791.438 | +0.1685             |      |
|          | 314.207 |                     | 342.202 | +0.16045 | 342.202 | 3  | I   | 13 | 1466.84  | 733.924 | +0.08706            |      |
|          | 401.239 |                     | 429.234 |          | 429.234 | 4  | S   | 12 | 1353.76  | 677.382 | +0.10501            |      |
|          | 502.287 |                     | 530.282 |          | 530.282 | 5  | T   | 11 | 1266.73  | 633.866 | -0.1194             |      |
|          | 615.371 |                     | 643.366 |          | 643.366 | 6  | I   | 10 | 1165.68  | 583.343 | +0.28492            |      |
|          | 702.403 | -0.202              | 365.703 |          | 730.398 | 7  | S   | 9  | 1052.59  | 526.801 | +0.28569            |      |
|          | 858.504 |                     | 886.499 |          | 886.499 | 8  | R   | 8  | 965.562  | 965.562 |                     |      |
|          | 986.563 |                     | 1014.56 |          | 1014.56 | 9  | Q   | 7  | 809.461  | 405.234 | +0.37783            |      |
|          | 1057.6  |                     | 1085.59 |          | 1085.59 | 10 | A   | 6  | 681.402  | 681.402 |                     |      |
|          | 1128.64 |                     | 1156.63 |          | 1156.63 | 11 | A   | 5  | 610.365  | 610.365 | +0.07311            |      |
|          | 1199.67 |                     | 1227.67 |          | 1227.67 | 12 | A   | 4  | 539.328  | 539.328 | +0.10442            |      |
|          | 1312.76 | -0.19               | 670.88  |          | 1340.75 | 13 | I   | 3  | 468.291  | 468.291 |                     |      |
|          | 1441.8  |                     | 1469.8  |          | 1469.8  | 14 | E   | 2  | 355.207  | 355.207 |                     |      |
|          | 1512.84 |                     | 1540.83 |          | 1540.83 | 15 | A   | 1  | 226.164  | 226.164 |                     |      |
|          |         |                     |         |          |         | 16 | K   | 0  | 155.127  | 155.127 |                     |      |

#### general information

|                       |           |
|-----------------------|-----------|
| Annotation:           | 10 of 16  |
| AminoAcids Coverage:  | 62 %      |
| Intensity Coverage:   | 43 %      |
| Protein Localisation: | 62 ... 77 |

Source: 20120601\_VR\_Bsu\_TripleSILAC\_WTPPrkPrpC\_GeLC\_F16  
 Scannumber: 29503  
 Protein: BSU30460; ytrA  
 Peptide Score: 64.27  
 Method: ITMS; CID; 3

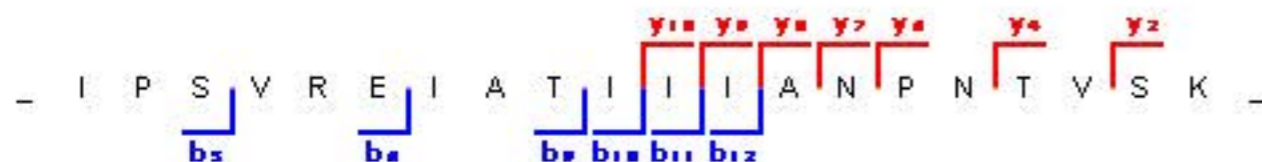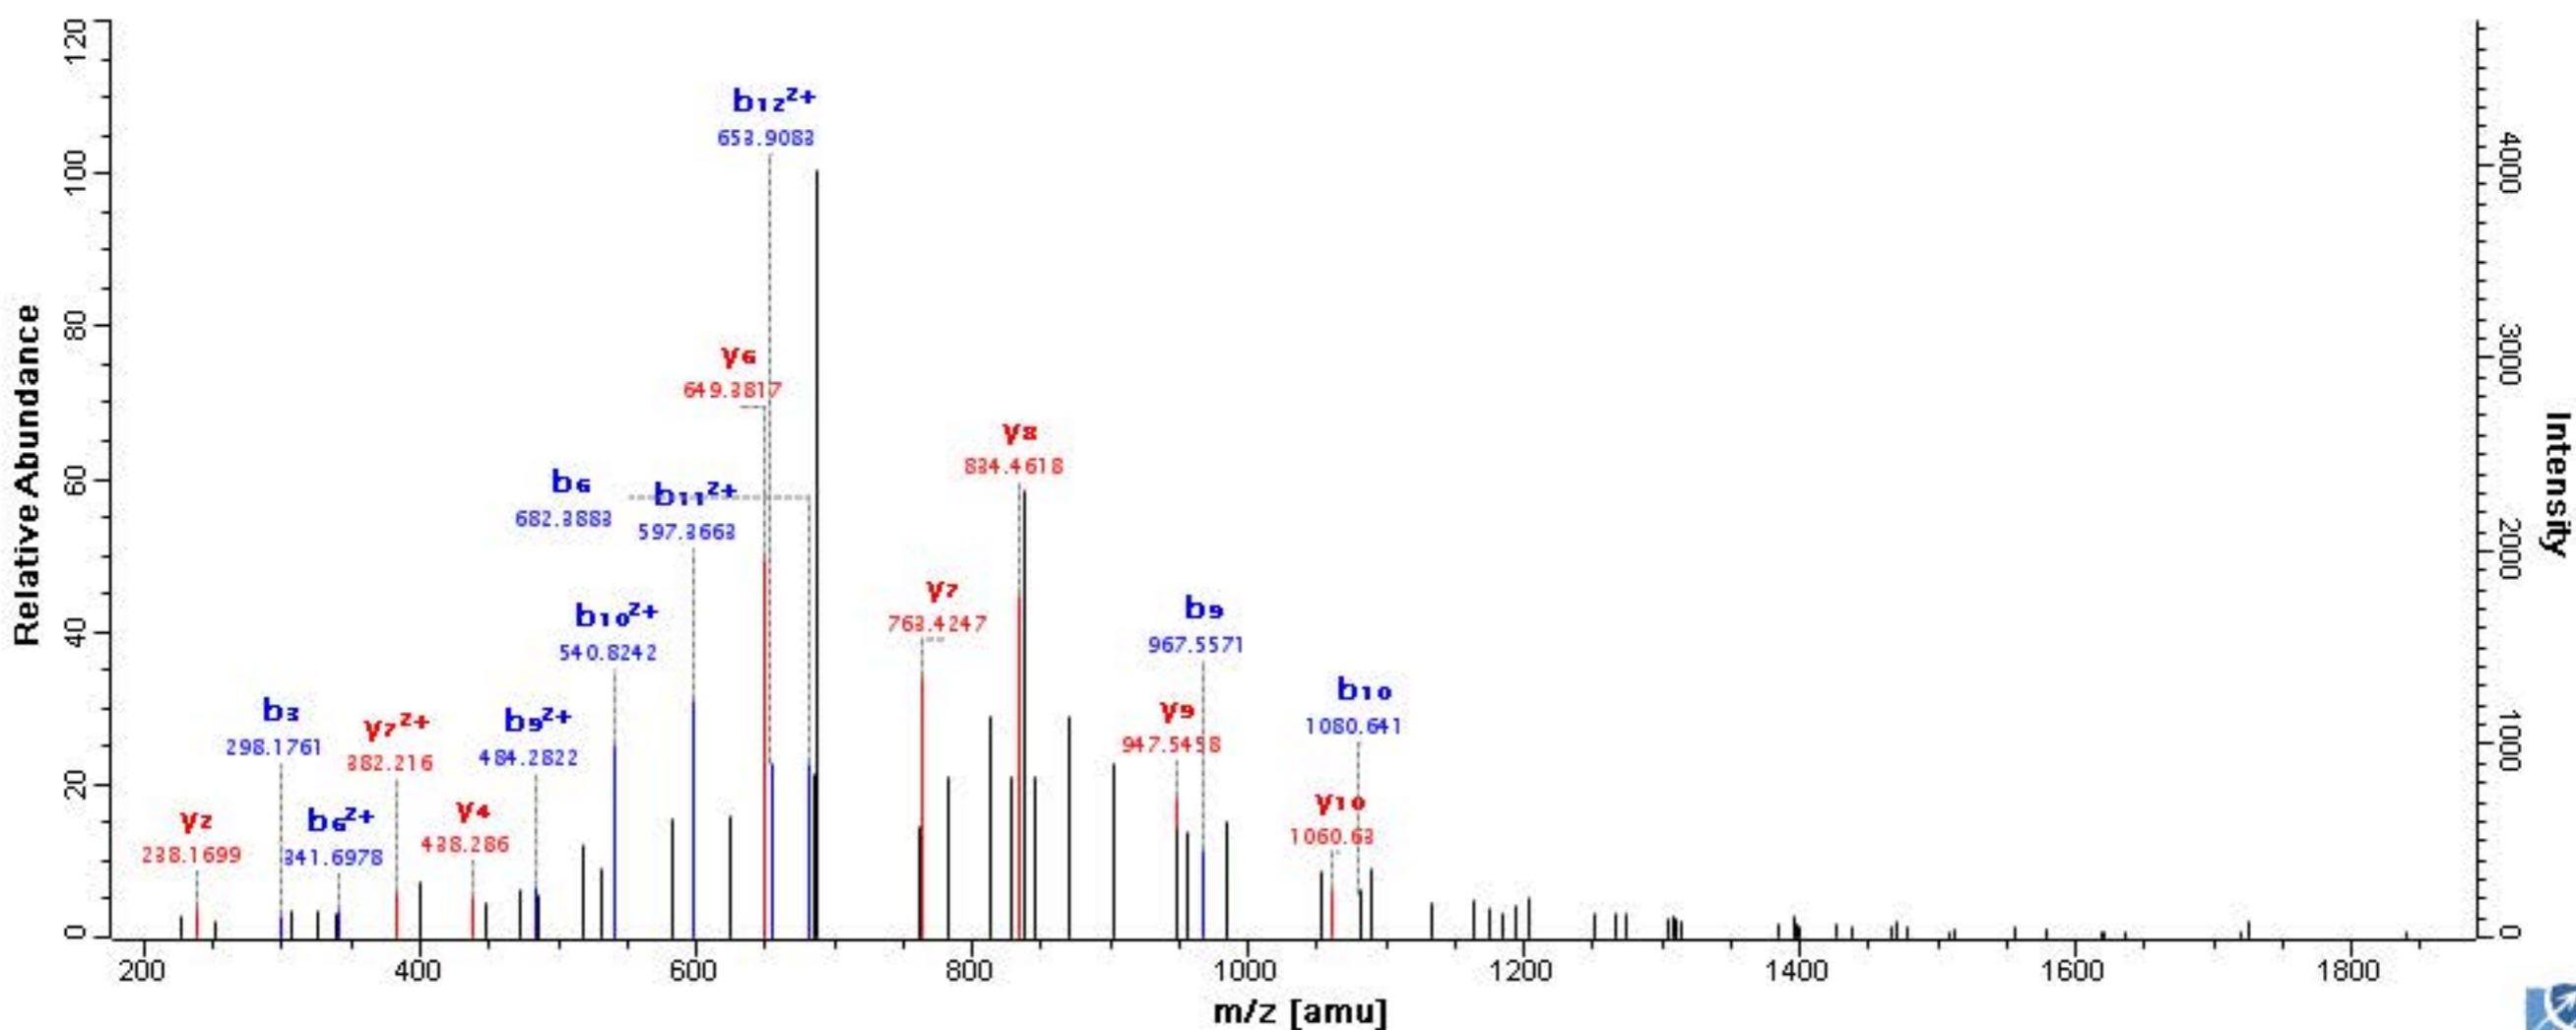

**precursor information**

|                   |                     |
|-------------------|---------------------|
| Mass:             | 2135.23393          |
| m/z:              | System.Collections. |
| Charge:           | System.Collections. |
| Retentiontime:    | System.Collections. |
| Score:            | 64.27496            |
| Mass Error [ppm]: | 1.1825              |
| PEP:              | 0.00030871          |
| Precursor Type:   | MULTI               |

| b <sup>2+</sup> ion |          | b ion     |          |     | γ ion |          | γ <sup>2+</sup> ion |           |          |           |
|---------------------|----------|-----------|----------|-----|-------|----------|---------------------|-----------|----------|-----------|
| Δ dalton            | mass     | Δ dalton  | mass     | seq |       | Δ dalton | mass                | Δ dalton  | mass     |           |
|                     | 114.0913 |           | 114.0913 | 1   | I     | 19       |                     |           |          |           |
|                     | 211.1441 |           | 211.1441 | 2   | P     | 18       | 2027.18             | 2027.18   |          |           |
|                     | 298.1761 | +0.068496 | 298.1761 | 3   | S     | 17       | 1930.127            | 1930.127  |          |           |
|                     | 397.2445 |           | 397.2445 | 4   | V     | 16       | 1843.095            | 1843.095  |          |           |
|                     | 553.3457 |           | 553.3457 | 5   | R     | 15       | 1744.027            | 1744.027  |          |           |
| -0.146006           | 341.6978 | -0.010687 | 682.3883 | 6   | E     | 14       | 1587.925            | 1587.925  |          |           |
|                     | 795.4723 |           | 795.4723 | 7   | I     | 13       | 1458.883            | 1458.883  |          |           |
|                     | 866.5094 |           | 866.5094 | 8   | A     | 12       | 1345.799            | 1345.799  |          |           |
| -0.018032           | 484.2822 | +0.14083  | 967.5571 | 9   | T     | 11       | 1274.762            | 1274.762  |          |           |
| -0.032354           | 540.8242 | +0.136539 | 1080.641 | 10  | I     | 10       | 1173.714            | 1173.714  |          |           |
| +0.044938           | 597.3663 |           | 1193.725 | 11  | I     | 9        | 1060.63             | +0.205801 | 1060.63  |           |
| +0.373695           | 653.9083 |           | 1306.809 | 12  | I     | 8        | 947.5458            | -0.009146 | 947.5458 |           |
|                     | 1377.846 |           | 1377.846 | 13  | A     | 7        | 834.4618            | +0.021085 | 834.4618 |           |
|                     | 1491.889 |           | 1491.889 | 14  | N     | 6        | 763.4247            | +0.024019 | 382.216  | +0.021402 |
|                     | 1588.942 |           | 1588.942 | 15  | P     | 5        | 649.3817            | -0.000315 | 649.3817 |           |
|                     | 1702.985 |           | 1702.985 | 16  | N     | 4        | 552.329             |           | 552.329  |           |
|                     | 1804.033 |           | 1804.033 | 17  | T     | 3        | 438.286             | -0.01943  | 438.286  |           |
|                     | 1903.101 |           | 1903.101 | 18  | V     | 2        | 337.2384            |           | 337.2384 |           |
|                     | 1990.133 |           | 1990.133 | 19  | S     | 1        | 238.1699            | +0.06619  | 238.1699 |           |
|                     |          |           |          | 20  | K     | 0        | 151.1379            |           | 151.1379 |           |

**general information**

|                       |           |
|-----------------------|-----------|
| Annotation:           | 11 of 20  |
| AminoAcids Coverage:  | 55 %      |
| Intensity Coverage:   | 35 %      |
| Protein Localisation: | 35 ... 54 |

Source: 20120601\_VR\_Bsu\_TripleSILAC\_WTPPrkCPrpC\_GeLC\_F16  
 Scannumber: 30996  
 Protein: atpC; BSU36800  
 Peptide Score: 40.41  
 Method: ITMS; CID; 3

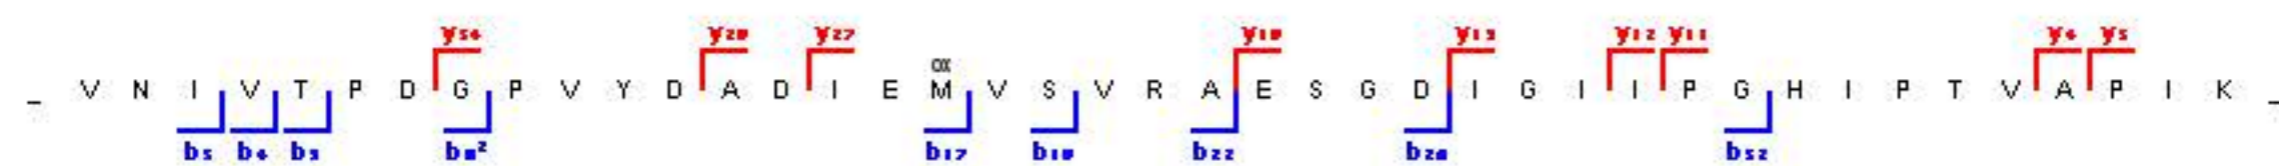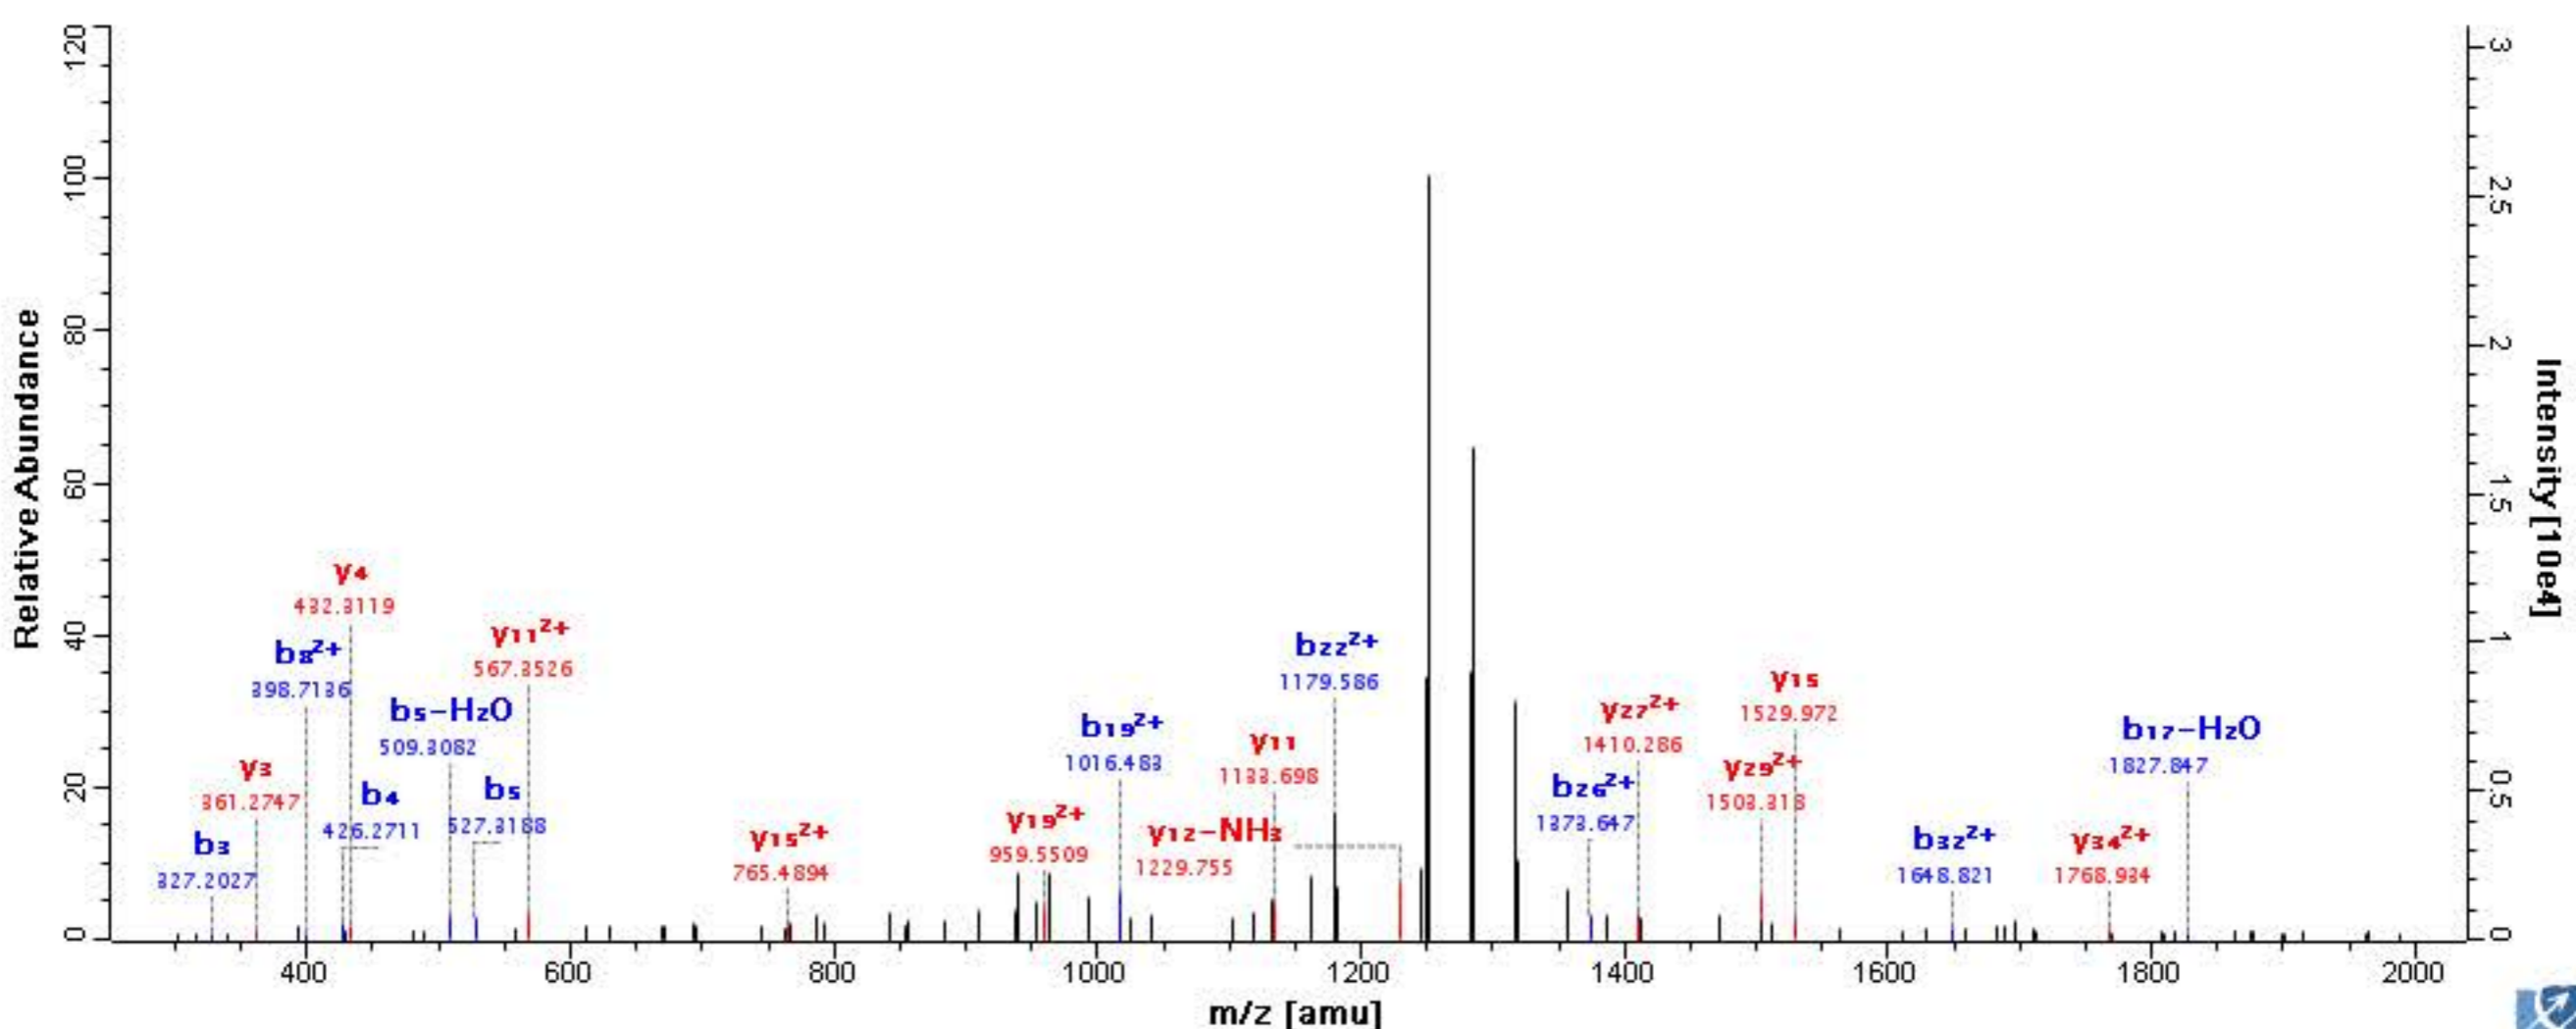

precursor information

|                   |                     |
|-------------------|---------------------|
| Mass:             | 4274.2371           |
| m/z:              | System.Collections. |
| Charge:           | System.Collections. |
| Retentiontime:    | System.Collections. |
| Score:            | 40.40741            |
| Mass Error [ppm]: | -1.7632             |
| PEP:              | 0.0037391           |
| Precursor Type:   | ISO                 |

| b <sup>2+</sup> ion |          | b ion     |          | seq |   |    | γ ion    |           | γ <sup>2+</sup> ion |           |
|---------------------|----------|-----------|----------|-----|---|----|----------|-----------|---------------------|-----------|
| Δ dalton            | mass     | Δ dalton  | mass     |     |   |    | Δ dalton | mass      | Δ dalton            | mass      |
|                     | 100.0757 |           | 100.0757 | 1   | V | 40 |          |           |                     |           |
|                     | 214.1186 |           | 214.1186 | 2   | N | 39 | 4176.183 |           | 4176.183            |           |
|                     | 327.2027 | +0.082078 | 327.2027 | 3   | I | 38 | 4062.141 |           | 4062.141            |           |
|                     | 426.2711 | +0.120262 | 426.2711 | 4   | V | 37 | 3949.057 |           | 3949.057            |           |
|                     | 527.3188 | +0.232984 | 527.3188 | 5   | T | 36 | 3849.988 |           | 3849.988            |           |
|                     | 624.3715 |           | 624.3715 | 6   | P | 35 | 3748.94  |           | 3748.94             |           |
|                     | 739.3985 |           | 739.3985 | 7   | D | 34 | 3651.888 |           | 3651.888            |           |
| -0.277972           | 398.7136 |           | 796.4199 | 8   | G | 33 | 3536.861 |           | 1768.934            | +0.107026 |
|                     | 893.4727 |           | 893.4727 | 9   | P | 32 | 3479.839 |           | 3479.839            |           |
|                     | 992.5411 |           | 992.5411 | 10  | V | 31 | 3382.786 |           | 3382.786            |           |
|                     | 1155.604 |           | 1155.604 | 11  | Y | 30 | 3283.718 |           | 3283.718            |           |
|                     | 1270.631 |           | 1270.631 | 12  | D | 29 | 3120.655 |           | 3120.655            |           |
|                     | 1341.669 |           | 1341.669 | 13  | A | 28 | 3005.628 |           | 1503.318            | +0.009615 |
|                     | 1456.695 |           | 1456.695 | 14  | D | 27 | 2934.591 |           | 2934.591            |           |
|                     | 1569.78  |           | 1569.78  | 15  | I | 26 | 2819.564 |           | 1410.286            | +0.331072 |
|                     | 1698.822 |           | 1698.822 | 16  | E | 25 | 2706.48  |           | 2706.48             |           |
|                     | 1845.858 |           | 1845.858 | 17  | M | 24 | 2577.437 |           | 2577.437            |           |
|                     | 1944.926 |           | 1944.926 | 18  | V | 23 | 2430.402 |           | 2430.402            |           |
| +0.485527           | 1016.483 |           | 2031.958 | 19  | S | 22 | 2331.333 |           | 2331.333            |           |
|                     | 2131.026 |           | 2131.026 | 20  | V | 21 | 2244.301 |           | 2244.301            |           |
|                     | 2287.127 |           | 2287.127 | 21  | R | 20 | 2145.233 |           | 2145.233            |           |
| +0.188604           | 1179.586 |           | 2358.165 | 22  | A | 19 | 1989.132 |           | 1989.132            |           |
|                     | 2487.207 |           | 2487.207 | 23  | E | 18 | 1918.095 |           | 959.5509            | +0.162687 |
|                     | 2574.239 |           | 2574.239 | 24  | S | 17 | 1789.052 |           | 1789.052            |           |
|                     | 2631.261 |           | 2631.261 | 25  | G | 16 | 1702.02  |           | 1702.02             |           |
| +0.219131           | 1373.647 |           | 2746.288 | 26  | D | 15 | 1644.999 |           | 1644.999            |           |
|                     | 2859.372 |           | 2859.372 | 27  | I | 14 | 1529.972 | +0.039174 | 765.4894            | +0.284809 |
|                     | 2916.393 |           | 2916.393 | 28  | G | 13 | 1416.888 |           | 1416.888            |           |
|                     | 3029.477 |           | 3029.477 | 29  | I | 12 | 1359.866 |           | 1359.866            |           |
|                     | 3142.561 |           | 3142.561 | 30  | I | 11 | 1246.782 |           | 1246.782            |           |
|                     | 3239.614 |           | 3239.614 | 31  | P | 10 | 1133.698 | +0.205042 | 567.3526            | +0.498968 |
| +0.105614           | 1648.821 |           | 3296.635 | 32  | G | 9  | 1036.645 |           | 1036.645            |           |
|                     | 3433.694 |           | 3433.694 | 33  | H | 8  | 979.6237 |           | 979.6237            |           |
|                     | 3546.778 |           | 3546.778 | 34  | I | 7  | 842.5648 |           | 842.5648            |           |
|                     | 3643.831 |           | 3643.831 | 35  | P | 6  | 729.4807 |           | 729.4807            |           |
|                     | 3744.879 |           | 3744.879 | 36  | T | 5  | 632.4279 |           | 632.4279            |           |
|                     | 3843.947 |           | 3843.947 | 37  | V | 4  | 531.3803 |           | 531.3803            |           |
|                     | 3914.984 |           | 3914.984 | 38  | A | 3  | 432.3119 | +0.300299 | 432.3119            |           |
|                     | 4012.037 |           | 4012.037 | 39  | P | 2  | 361.2747 | +0.147319 | 361.2747            |           |
|                     | 4125.121 |           | 4125.121 | 40  | I | 1  | 264.222  |           | 264.222             |           |
|                     |          |           |          | 41  | K | 0  | 151.1379 |           | 151.1379            |           |

general information

|                       |          |
|-----------------------|----------|
| Annotation:           | 17 of 41 |
| AminoAcids Coverage:  | 41 %     |
| Intensity Coverage:   | 11 %     |
| Protein Localisation: | 6 ... 46 |

Source: 20120602\_VR\_Bsu\_TripleSILAC\_pWTPPrkCPrpC\_F14  
 Scannumber: 3107  
 Protein: BSU00330; yabA  
 Peptide Score: 96.1  
 Method: ITMS; CID; 3

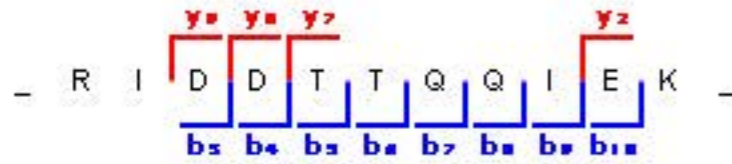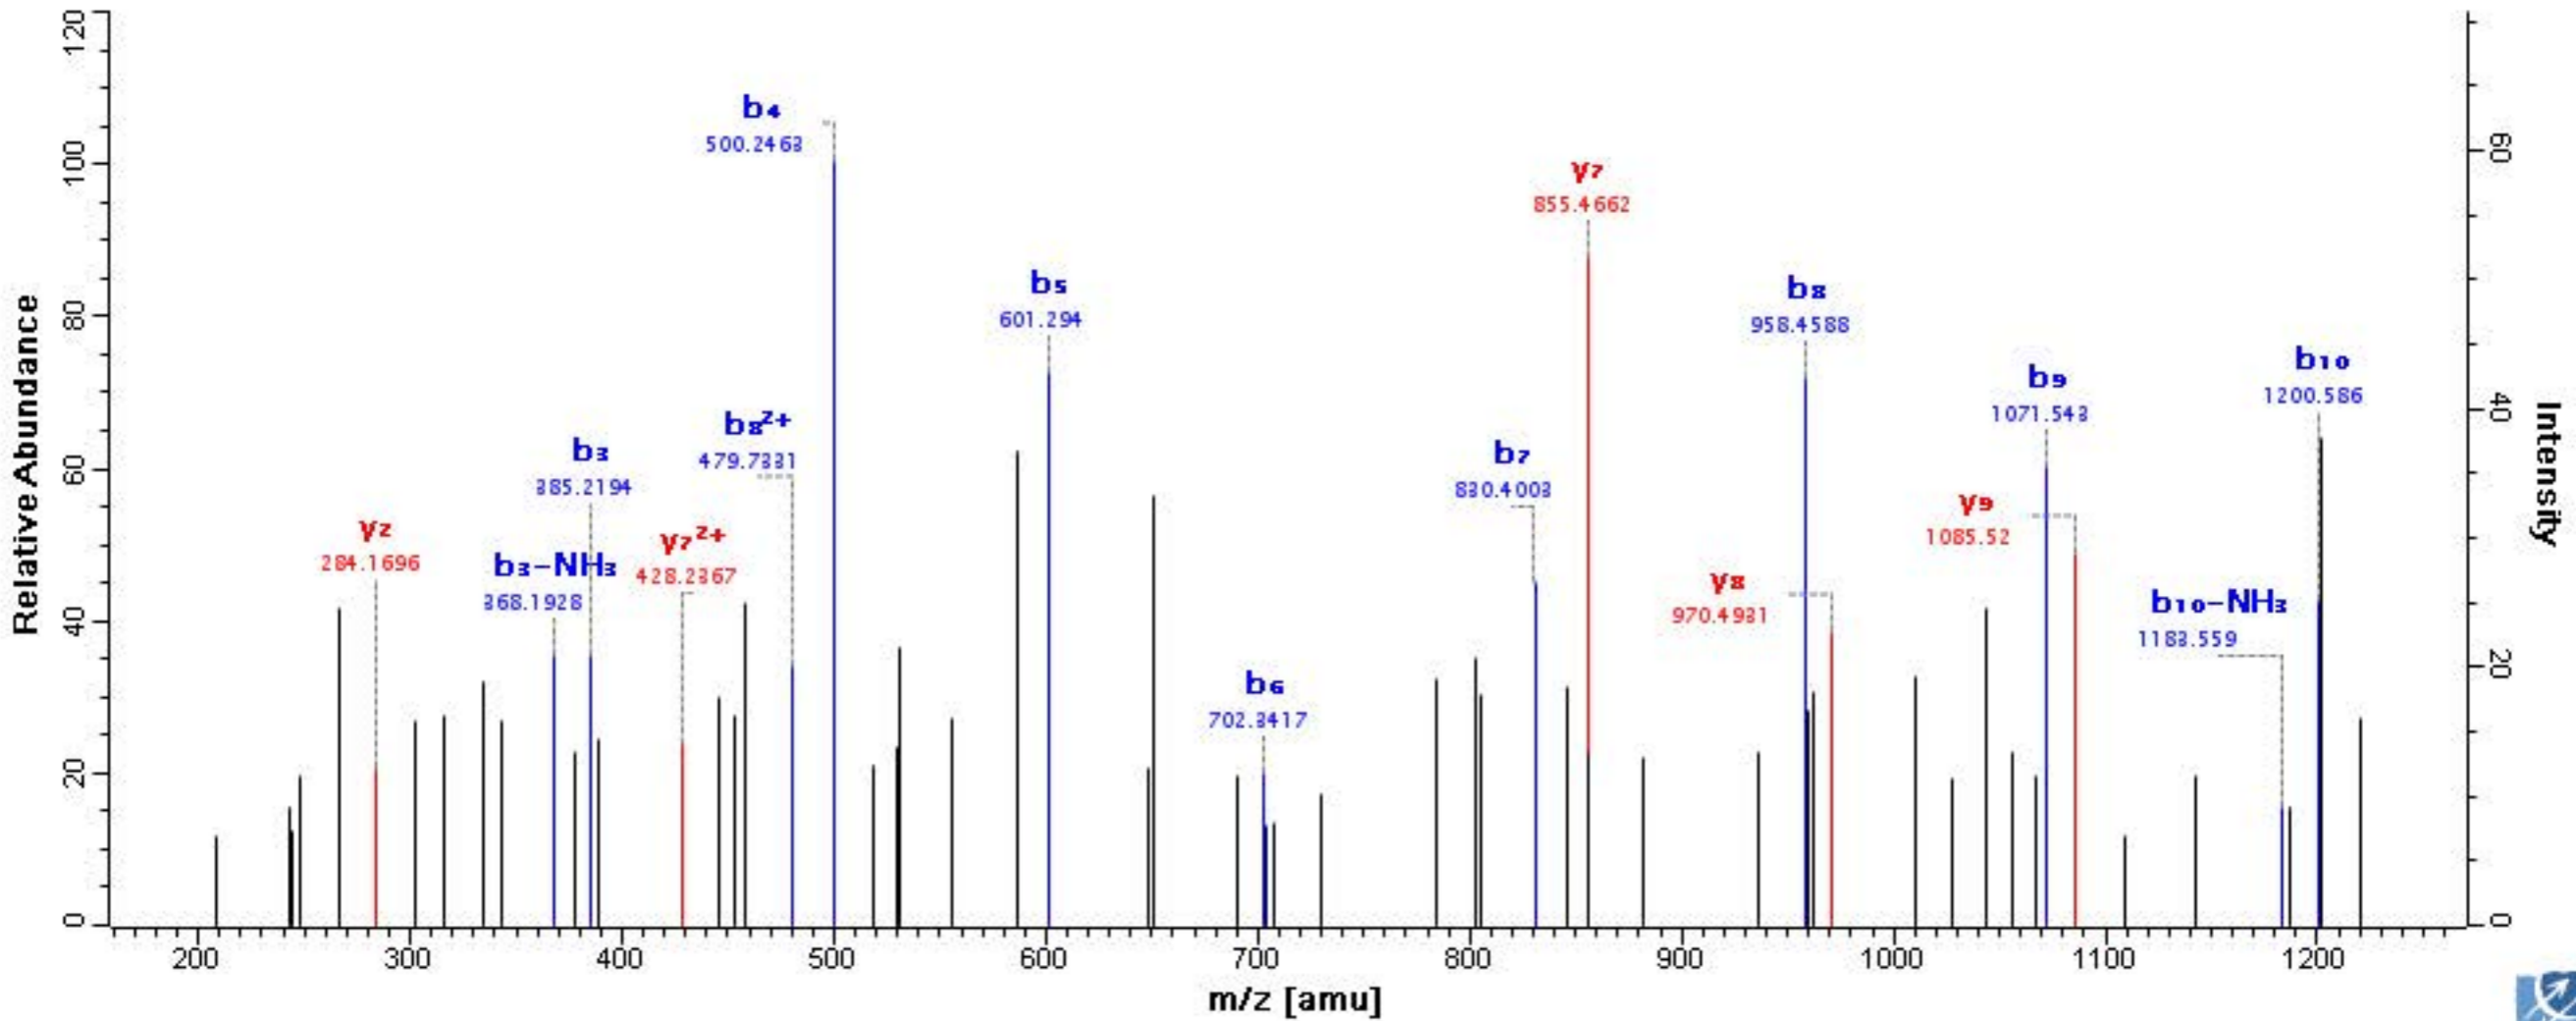

#### precursor information

|                   |                     |
|-------------------|---------------------|
| Mass:             | 1345.68346          |
| m/z:              | System.Collections. |
| Charge:           | System.Collections. |
| Retentiontime:    | System.Collections. |
| Score:            | 96.10284            |
| Mass Error [ppm]: | -0.22107            |
| PEP:              | 0.00017251          |
| Precursor Type:   | MULTI               |

#### general information

|                       |           |
|-----------------------|-----------|
| Annotation:           | 8 of 11   |
| AminoAcids Coverage:  | 73 %      |
| Intensity Coverage:   | 39 %      |
| Protein Localisation: | 51 ... 61 |

| b <sup>2+</sup> ion |          | b ion     |          |     | y ion |          | y <sup>2+</sup> ion |           |          |           |
|---------------------|----------|-----------|----------|-----|-------|----------|---------------------|-----------|----------|-----------|
| Δ dalton            | mass     | Δ dalton  | mass     | seq |       | Δ dalton | mass                | Δ dalton  | mass     |           |
|                     | 157.1084 |           | 157.1084 | 1   | R     | 10       |                     |           |          |           |
|                     | 270.1925 |           | 270.1925 | 2   | I     | 9        | 1198.604            |           | 1198.604 |           |
|                     | 385.2194 | +0.05856  | 385.2194 | 3   | D     | 8        | 1085.52             | +0.101036 | 1085.52  |           |
|                     | 500.2463 | +0.13617  | 500.2463 | 4   | D     | 7        | 970.4931            | +0.078845 | 970.4931 |           |
|                     | 601.294  | -0.060129 | 601.294  | 5   | T     | 6        | 855.4662            | +0.19081  | 428.2367 | -0.028716 |
|                     | 702.3417 | +0.221843 | 702.3417 | 6   | T     | 5        | 754.4185            |           | 754.4185 |           |
|                     | 830.4003 | +0.233639 | 830.4003 | 7   | Q     | 4        | 653.3708            |           | 653.3708 |           |
| +0.03305            | 479.7331 | -0.061816 | 958.4588 | 8   | Q     | 3        | 525.3122            |           | 525.3122 |           |
|                     | 1071.543 | +0.199274 | 1071.543 | 9   | I     | 2        | 397.2537            |           | 397.2537 |           |
|                     | 1200.586 | +0.277408 | 1200.586 | 10  | E     | 1        | 284.1696            | +0.178518 | 284.1696 |           |
|                     |          |           |          | 11  | K     | 0        | 155.127             |           | 155.127  |           |

Source: 20120602\_VR\_Bsu\_TripleSILAC\_WTPPrkCPrpC\_OG\_F02  
 Scannumber: 10741  
 Protein: BSU34710; yvcQ  
 Peptide Score: 169.4  
 Method: ITMS; CID; 3

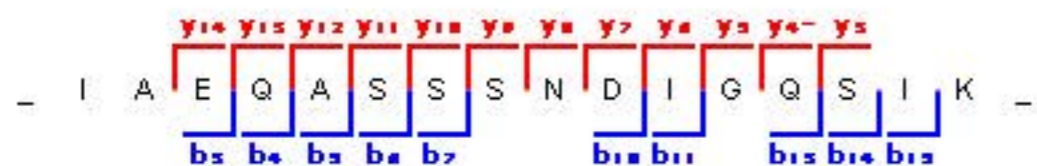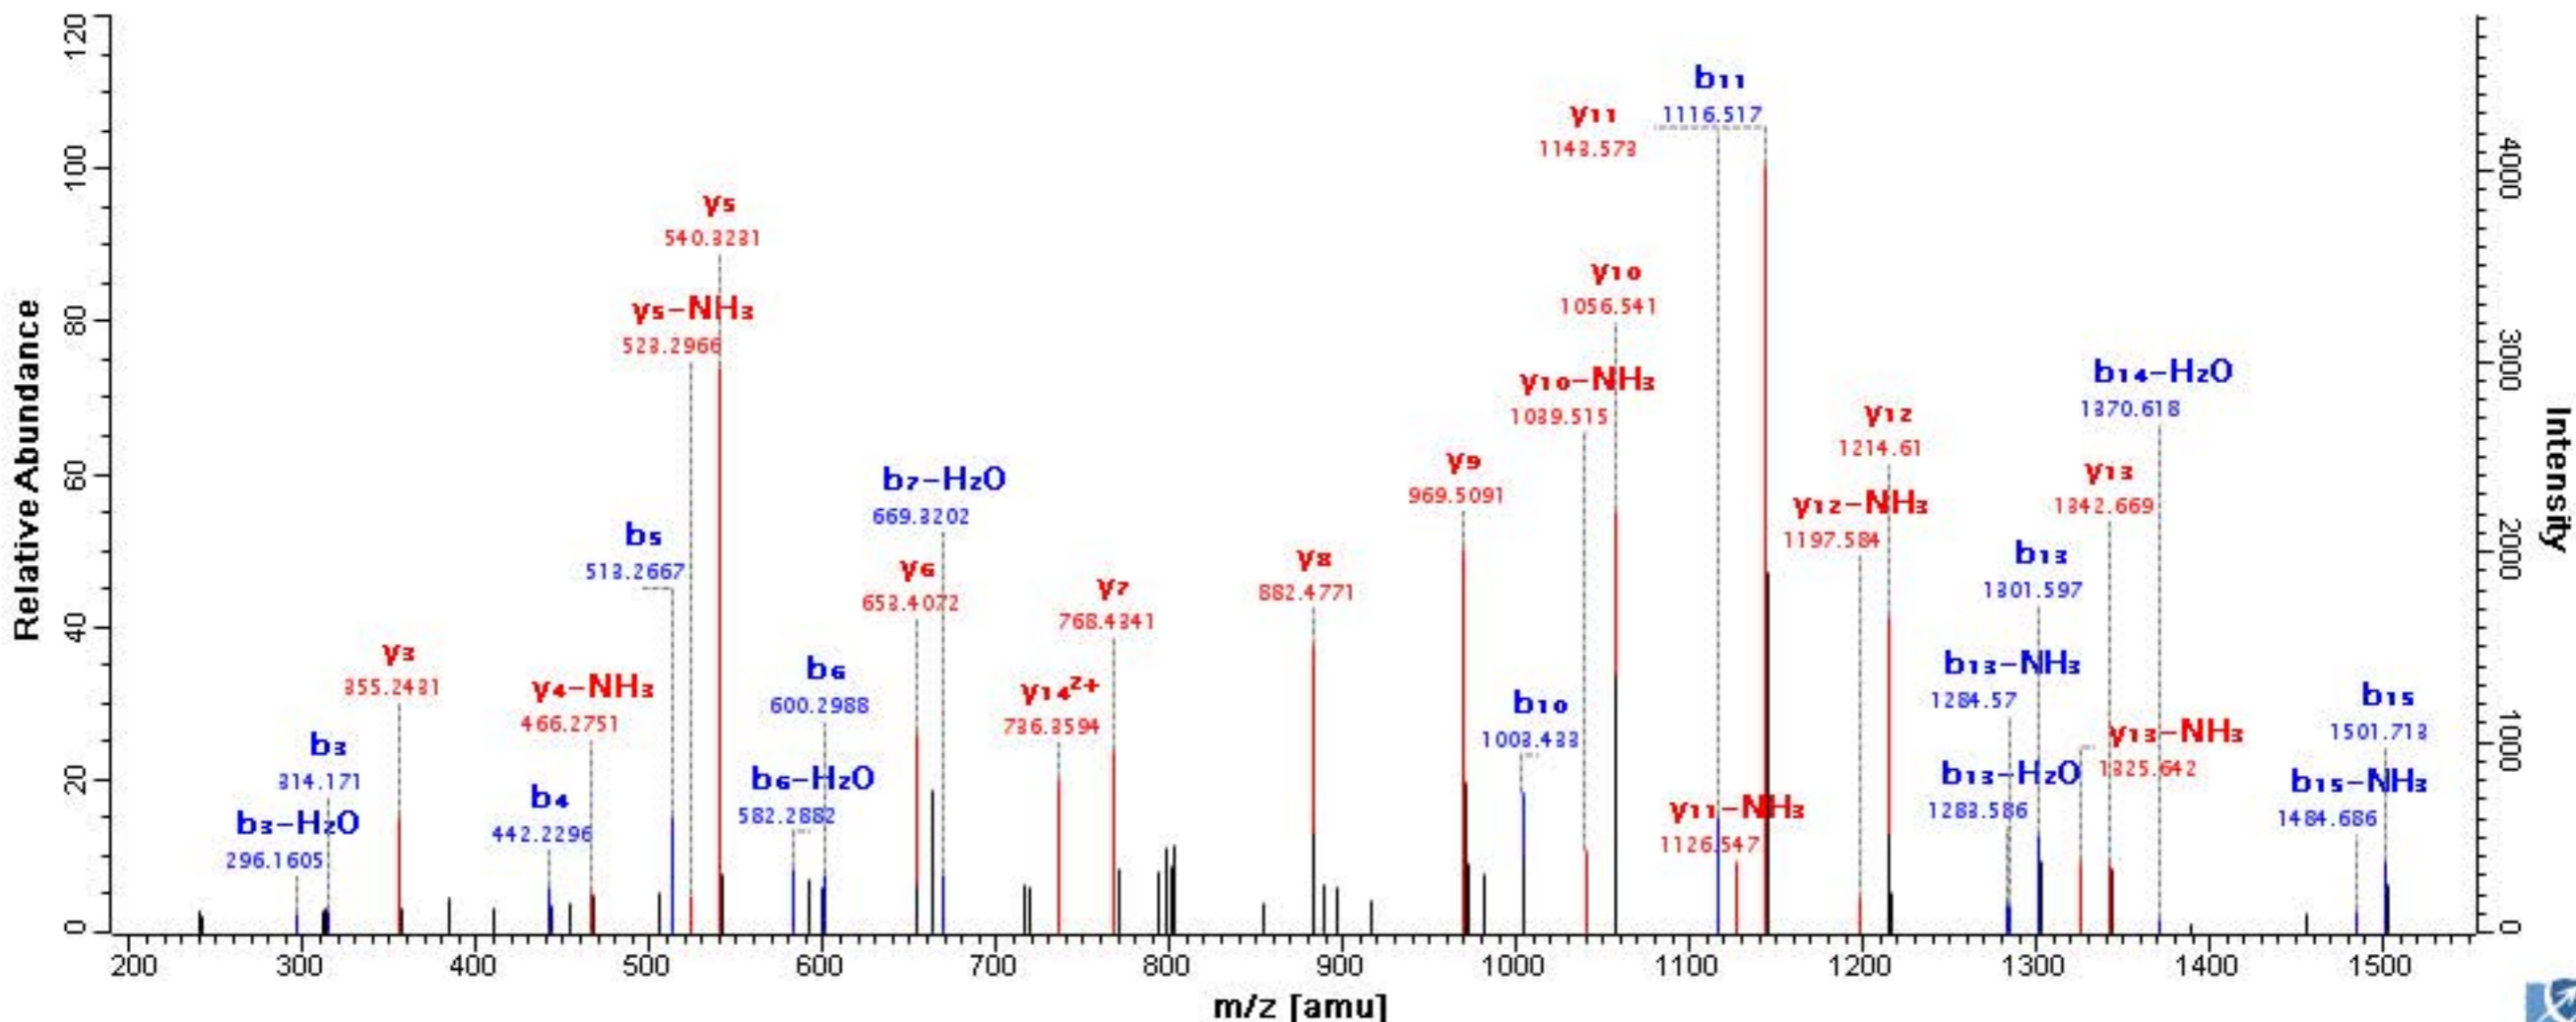

#### precursor information

|                   |                     |
|-------------------|---------------------|
| Mass:             | 1654.82517          |
| m/z:              | System.Collections. |
| Charge:           | System.Collections. |
| Retentiontime:    | System.Collections. |
| Score:            | 169.3951            |
| Mass Error [ppm]: | -0.10603            |
| PEP:              | 3.8022E-65          |
| Precursor Type:   | ISO                 |

| b ion           |              |    |     |    | $\gamma$ ion    |            | $\gamma^{2+}$ ion |            |
|-----------------|--------------|----|-----|----|-----------------|------------|-------------------|------------|
| $\Delta$ dalton | mass         |    | seq |    | $\Delta$ dalton | mass       | $\Delta$ dalton   | mass       |
|                 | 114.09134045 | 1  | I   | 15 |                 |            |                   |            |
|                 | 185.12845423 | 2  | A   | 14 | 1542.7485545    |            | 1542.7485545      |            |
| +0.0346106      | 314.17104733 | 3  | E   | 13 | 1471.7114407    |            | 736.35935858      | +0.1779339 |
| -0.0043441      | 442.22962484 | 4  | Q   | 12 | 1342.6688476    | +0.1645264 | 1342.6688476      |            |
| -0.0196683      | 513.26673863 | 5  | A   | 11 | 1214.6102701    | +0.0736899 | 1214.6102701      |            |
| +0.0184937      | 600.29876704 | 6  | S   | 10 | 1143.5731563    | +0.0658818 | 1143.5731563      |            |
|                 | 687.33079545 | 7  | S   | 9  | 1056.5411279    | -0.0128076 | 1056.5411279      |            |
|                 | 774.36282386 | 8  | S   | 8  | 969.50909948    | +0.0198312 | 969.50909948      |            |
|                 | 888.40575131 | 9  | N   | 7  | 882.47707107    | -0.0418294 | 882.47707107      |            |
| +0.0849448      | 1003.4326943 | 10 | D   | 6  | 768.43414362    | +0.0169062 | 768.43414362      |            |
| +0.0257221      | 1116.5167583 | 11 | I   | 5  | 653.40720059    | +0.0763199 | 653.40720059      |            |
|                 | 1173.538222  | 12 | G   | 4  | 540.32313661    | -0.061662  | 540.32313661      |            |
| +0.0738547      | 1301.5967996 | 13 | Q   | 3  | 483.30167289    |            | 483.30167289      |            |
|                 | 1388.628828  | 14 | S   | 2  | 355.24309537    | -0.0425339 | 355.24309537      |            |
| +0.0830065      | 1501.7128919 | 15 | I   | 1  | 268.21106696    |            | 268.21106696      |            |
|                 |              | 16 | K   | 0  | 155.12700298    |            | 155.12700298      |            |

#### general information

|                       |           |
|-----------------------|-----------|
| Annotation:           | 13 of 16  |
| AminoAcids Coverag    | 81 %      |
| Intensity Coverage:   | 62 %      |
| Protein Localisation: | 75 ... 90 |

Source: 20120602\_VR\_Bsu\_TripleSILAC\_WTPPrkCPrpC\_OG\_F02  
 Scannumber: 12276  
 Protein: BSU06920; yeeN; yesJ; yfxC; yfxD  
 Peptide Score: 159.5  
 Method: ITMS; CID; 3

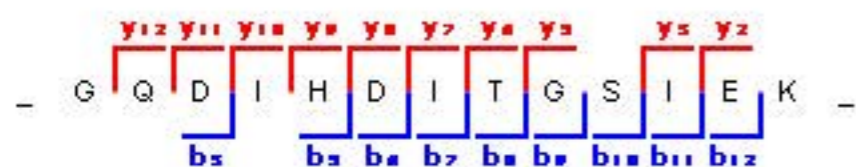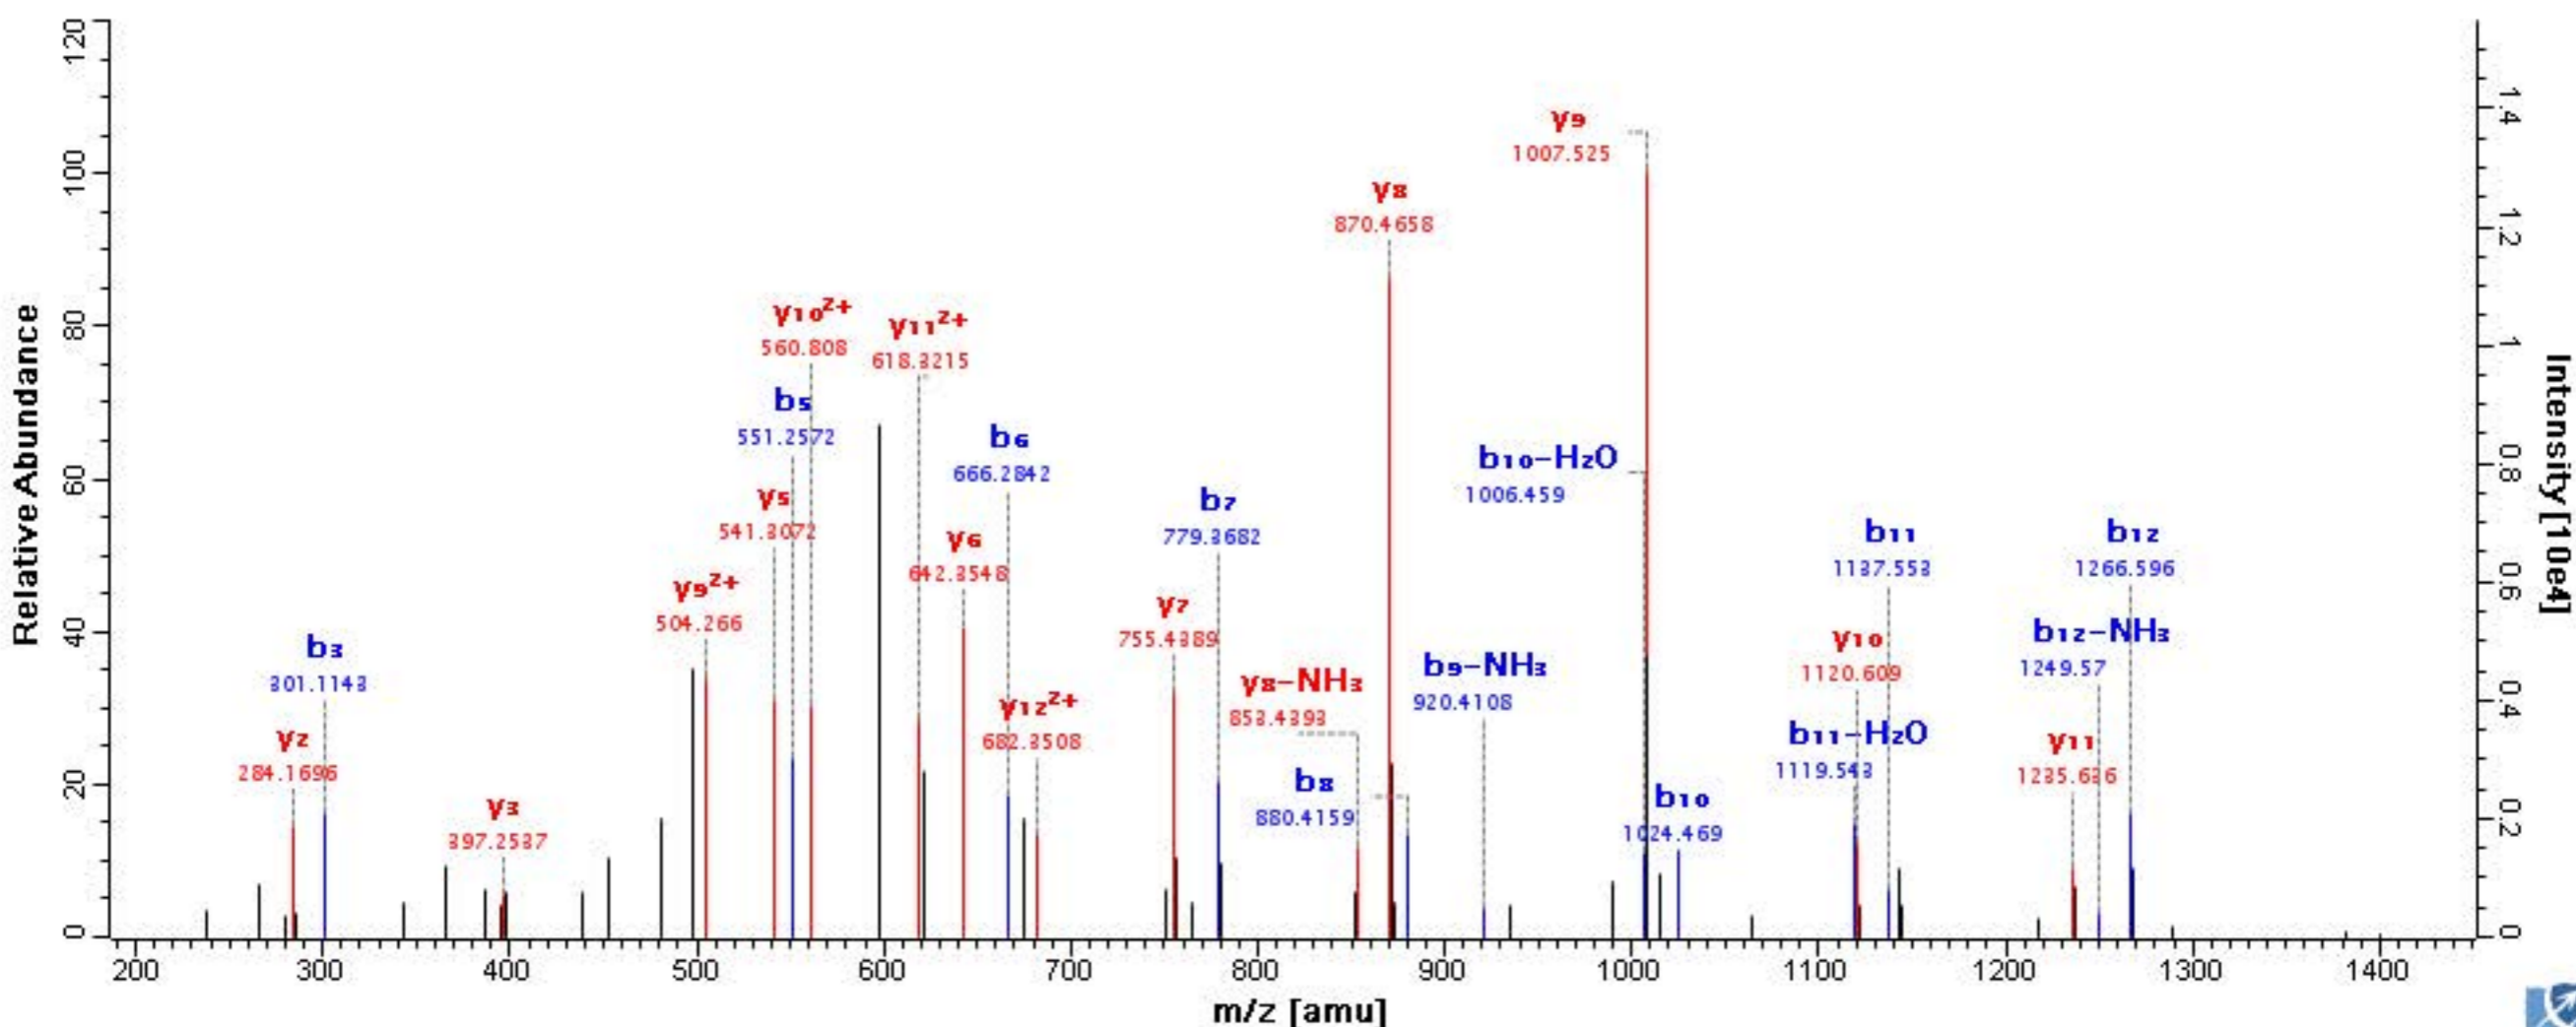

#### precursor information

|                   |                     |
|-------------------|---------------------|
| Mass:             | 1419.70894          |
| m/z:              | System.Collections. |
| Charge:           | System.Collections. |
| Retentiontime:    | System.Collections. |
| Score:            | 159.496             |
| Mass Error [ppm]: | 0.29172             |
| PEP:              | 7.6366E-37          |
| Precursor Type:   | ISO                 |

#### general information

|                       |           |
|-----------------------|-----------|
| Annotation:           | 11 of 13  |
| AminoAcids Coverag    | 85 %      |
| Intensity Coverage:   | 62 %      |
| Protein Localisation: | 53 ... 65 |

| b ion      |              |    |     |    | γ ion        |            | γ <sup>2+</sup> ion |            |
|------------|--------------|----|-----|----|--------------|------------|---------------------|------------|
| Δ dalton   | mass         |    | seq |    | Δ dalton     | mass       | Δ dalton            | mass       |
|            | 58.02874019  | 1  | G   | 12 |              |            |                     |            |
|            | 186.0873177  | 2  | Q   | 11 | 1363.6943341 |            | 682.35080527        | +0.1744023 |
| +0.1513337 | 301.11426073 | 3  | D   | 10 | 1235.6357566 | +0.0617532 | 618.32151651        | +0.2630782 |
|            | 414.19832471 | 4  | I   | 9  | 1120.6088135 | -0.0012696 | 560.80804499        | +0.188537  |
| +0.1330222 | 551.25723658 | 5  | H   | 8  | 1007.5247495 | +0.1166079 | 504.266013          | -0.0011204 |
| +0.0430299 | 666.28417961 | 6  | D   | 7  | 870.46583768 | +0.1023386 | 870.46583768        |            |
| +0.0648619 | 779.36824359 | 7  | I   | 6  | 755.43889465 | +0.0947357 | 755.43889465        |            |
| +0.1130696 | 880.41592206 | 8  | T   | 5  | 642.35483067 | +0.0948153 | 642.35483067        |            |
|            | 937.43738579 | 9  | G   | 4  | 541.30715219 | +0.0146251 | 541.30715219        |            |
| +0.2215038 | 1024.4694142 | 10 | S   | 3  | 484.28568847 |            | 484.28568847        |            |
| +0.0059701 | 1137.5534782 | 11 | I   | 2  | 397.25366006 | -0.0355204 | 397.25366006        |            |
| +0.1763897 | 1266.5960713 | 12 | E   | 1  | 284.16959608 | -0.1344398 | 284.16959608        |            |
|            |              | 13 | K   | 0  | 155.12700298 |            | 155.12700298        |            |

Source: 20120602\_VR\_Bsu\_TripleSILAC\_WTPPrkCPrpC\_OG\_F02  
 Scannumber: 18645  
 Protein: BSU33230; sigO; yvrI  
 Peptide Score: 148.32  
 Method: ITMS; CID; 3

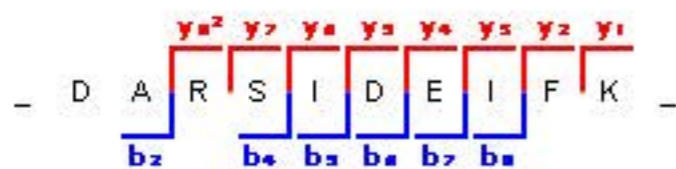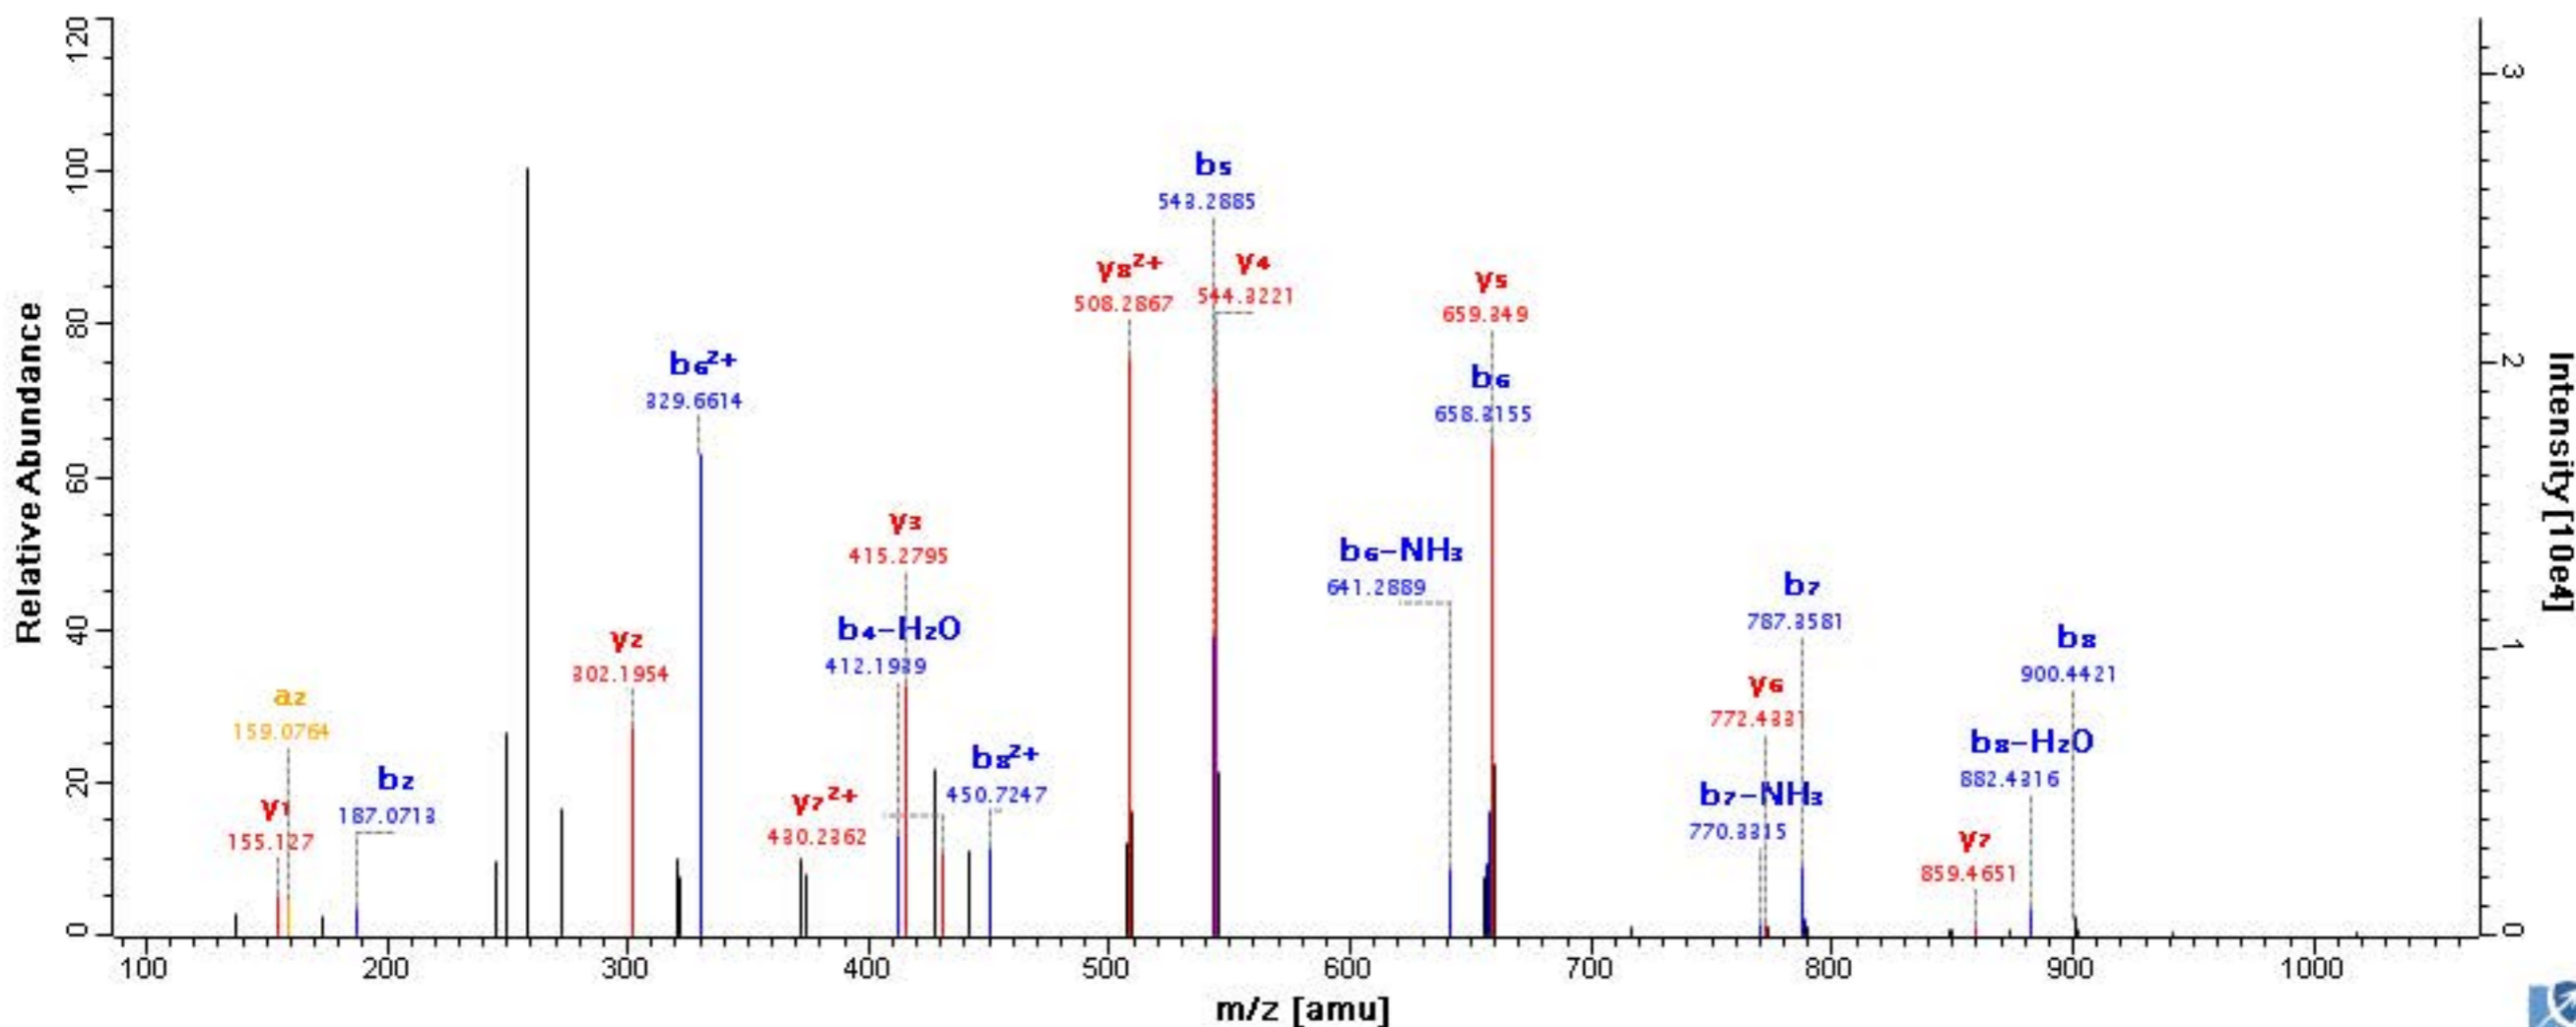

#### precursor information

|                   |                     |
|-------------------|---------------------|
| Mass:             | 1192.60836          |
| m/z:              | System.Collections. |
| Charge:           | System.Collections. |
| Retentiontime:    | System.Collections. |
| Score:            | 148.321             |
| Mass Error [ppm]: | -0.36405            |
| PEP:              | 4.6446E-17          |
| Precursor Type:   | MULTI               |

#### general information

|                       |           |
|-----------------------|-----------|
| Annotation:           | 9 of 10   |
| AminoAcids Coverage:  | 90 %      |
| Intensity Coverage:   | 58 %      |
| Protein Localisation: | 30 ... 39 |

| a ion           |         | $b^{2+}$ ion    |         | b ion           |         |    |     |   | y ion           |          | $y^{2+}$ ion    |         |
|-----------------|---------|-----------------|---------|-----------------|---------|----|-----|---|-----------------|----------|-----------------|---------|
| $\Delta$ dalton | mass    | $\Delta$ dalton | mass    | $\Delta$ dalton | mass    |    | seq |   | $\Delta$ dalton | mass     | $\Delta$ dalton | mass    |
|                 | 88.0393 |                 | 116.034 |                 | 116.034 | 1  | D   | 9 |                 |          |                 |         |
| +0.08038        | 159.076 |                 | 187.071 | +0.0228         | 187.071 | 2  | A   | 8 | 1086.6          |          | 1086.6          |         |
|                 | 315.178 |                 | 343.172 |                 | 343.172 | 3  | R   | 7 | 1015.57         |          | 508.287         | +0.0479 |
|                 | 402.21  |                 | 430.204 |                 | 430.204 | 4  | S   | 6 | 859.465         | +0.2580  | 430.236         | +0.1458 |
|                 | 515.294 |                 | 543.289 | -0.0197         | 543.289 | 5  | I   | 5 | 772.433         | +0.16329 | 772.433         |         |
|                 | 630.321 | +0.23352        | 329.661 | -0.0608         | 658.315 | 6  | D   | 4 | 659.349         | -0.0355  | 659.349         |         |
|                 | 759.363 |                 | 787.358 | -0.0202         | 787.358 | 7  | E   | 3 | 544.322         | -0.0609  | 544.322         |         |
|                 | 872.447 | +0.10958        | 450.725 | +0.07123        | 900.442 | 8  | I   | 2 | 415.279         | -0.0189  | 415.279         |         |
|                 | 1019.52 |                 | 1047.51 |                 | 1047.51 | 9  | F   | 1 | 302.195         | +0.02736 | 302.195         |         |
|                 |         |                 |         |                 |         | 10 | K   | 0 | 155.127         | +0.0768  | 155.127         |         |

Source: 20120602\_VR\_Bsu\_TripleSILAC\_WTPPrkCPrpC\_OG\_FD3  
 Scannumber: 15252  
 Protein: BSU15080; rpmF  
 Peptide Score: 133.48  
 Method: ITMS; CID; 3

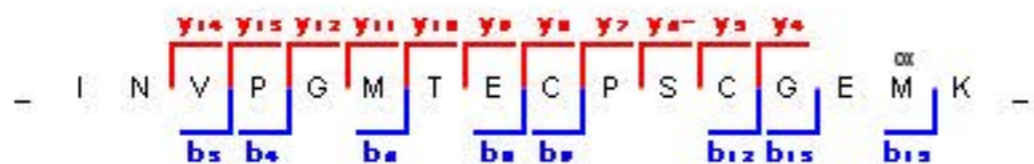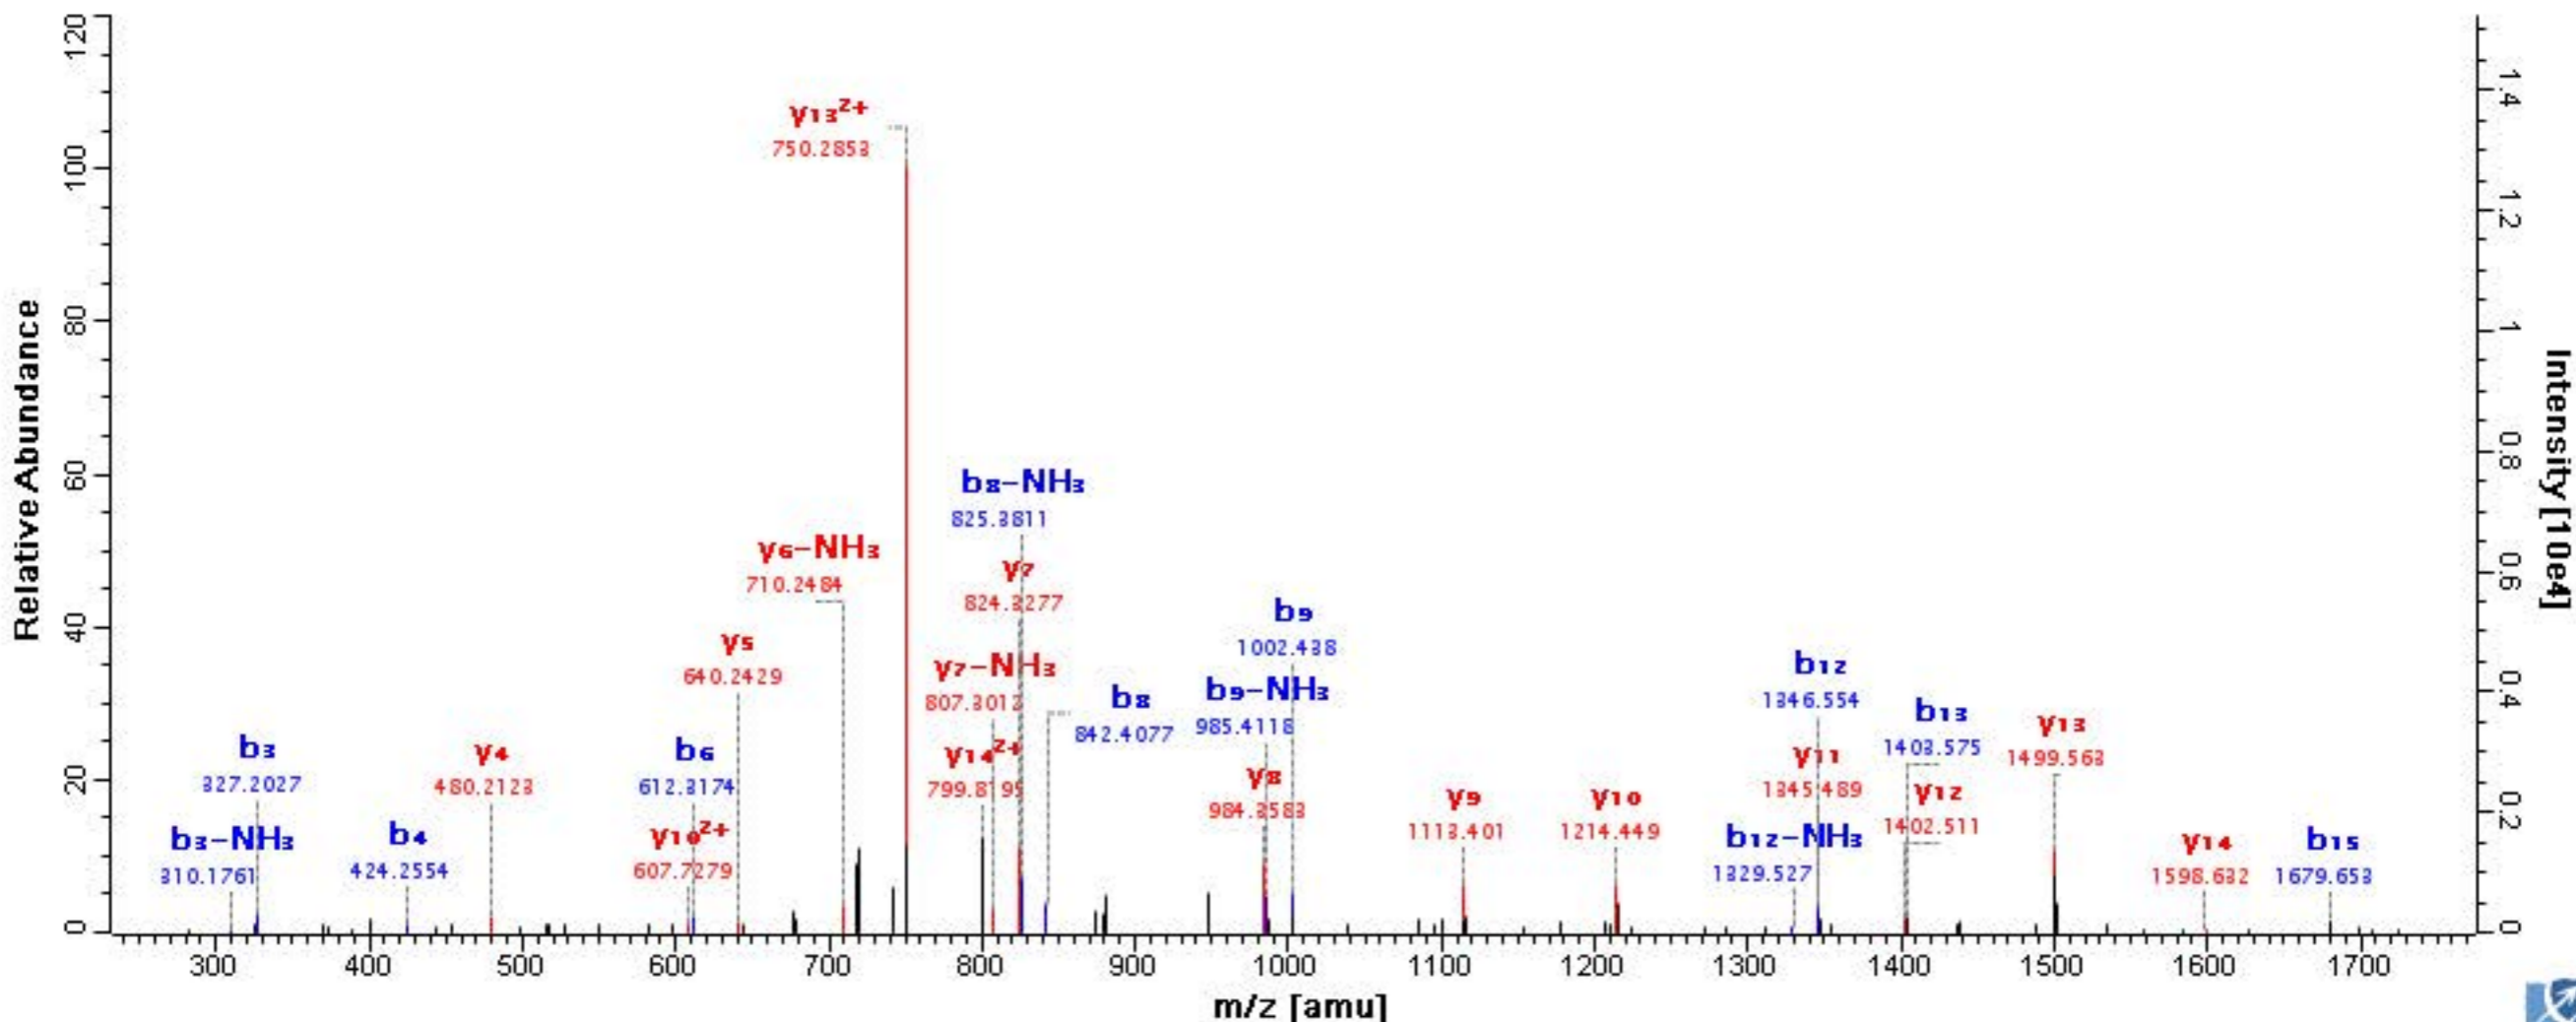

#### precursor information

|                   |                     |
|-------------------|---------------------|
| Mass:             | 1824.75227          |
| m/z:              | System.Collections. |
| Charge:           | System.Collections. |
| Retentiontime:    | System.Collections. |
| Score:            | 133.4825            |
| Mass Error [ppm]: | 0.44316             |
| PEP:              | 1.7878E-24          |
| Precursor Type:   | MULTI               |

| b ion        |              |    |     |    | gamma ion    |            | gamma^2+ ion |            |
|--------------|--------------|----|-----|----|--------------|------------|--------------|------------|
| delta dalton | mass         |    | seq |    | delta dalton | mass       | delta dalton | mass       |
|              | 114.09134045 | 1  | I   | 15 |              |            |              |            |
|              | 228.13426789 | 2  | N   | 14 | 1712.674674  |            | 1712.674674  |            |
| -0.2476647   | 327.20268181 | 3  | V   | 13 | 1598.6317466 | +0.3077066 | 799.81951151 | +0.0742263 |
| +0.0096911   | 424.25544566 | 4  | P   | 12 | 1499.5633326 | +0.0069799 | 750.28530455 | +0.2734113 |
|              | 481.27690939 | 5  | G   | 11 | 1402.5105688 | +0.1761988 | 1402.5105688 |            |
| +0.1111338   | 612.31739399 | 6  | M   | 10 | 1345.4891051 | +0.0591127 | 1345.4891051 |            |
|              | 713.36507247 | 7  | T   | 9  | 1214.4486205 | -0.0035521 | 607.72794846 | +0.3714778 |
| -0.0713619   | 842.40766556 | 8  | E   | 8  | 1113.400942  | +0.0643901 | 1113.400942  |            |
| -0.0032552   | 1002.4383138 | 9  | C   | 7  | 984.35834888 | +0.0835456 | 984.35834888 |            |
|              | 1099.4910776 | 10 | P   | 6  | 824.32770068 | -0.0026274 | 824.32770068 |            |
|              | 1186.523106  | 11 | S   | 5  | 727.27493683 |            | 727.27493683 |            |
| +0.0385309   | 1346.5537542 | 12 | C   | 4  | 640.24290842 | +0.0208855 | 640.24290842 |            |
| +0.127907    | 1403.575218  | 13 | G   | 3  | 480.21226022 | -0.005229  | 480.21226022 |            |
|              | 1532.617811  | 14 | E   | 2  | 423.1907965  |            | 423.1907965  |            |
| -0.0129515   | 1679.6532103 | 15 | M   | 1  | 294.1482034  |            | 294.1482034  |            |
|              |              | 16 | K   | 0  | 147.11280417 |            | 147.11280417 |            |

#### general information

|                       |           |
|-----------------------|-----------|
| Annotation:           | 12 of 16  |
| AminoAcids Coverag    | 75 %      |
| Intensity Coverage:   | 61 %      |
| Protein Localisation: | 22 ... 37 |



Source: 201 20602\_VR\_Bsu\_TripleSILAC\_WTPPrkCPrpC\_OG\_F03  
 Scannumber: 16492  
 Protein: BSU31310; yugP  
 Peptide Score: 55.75  
 Method: ITMS; CID; 3

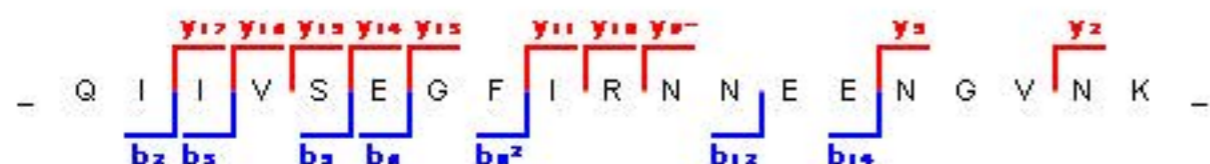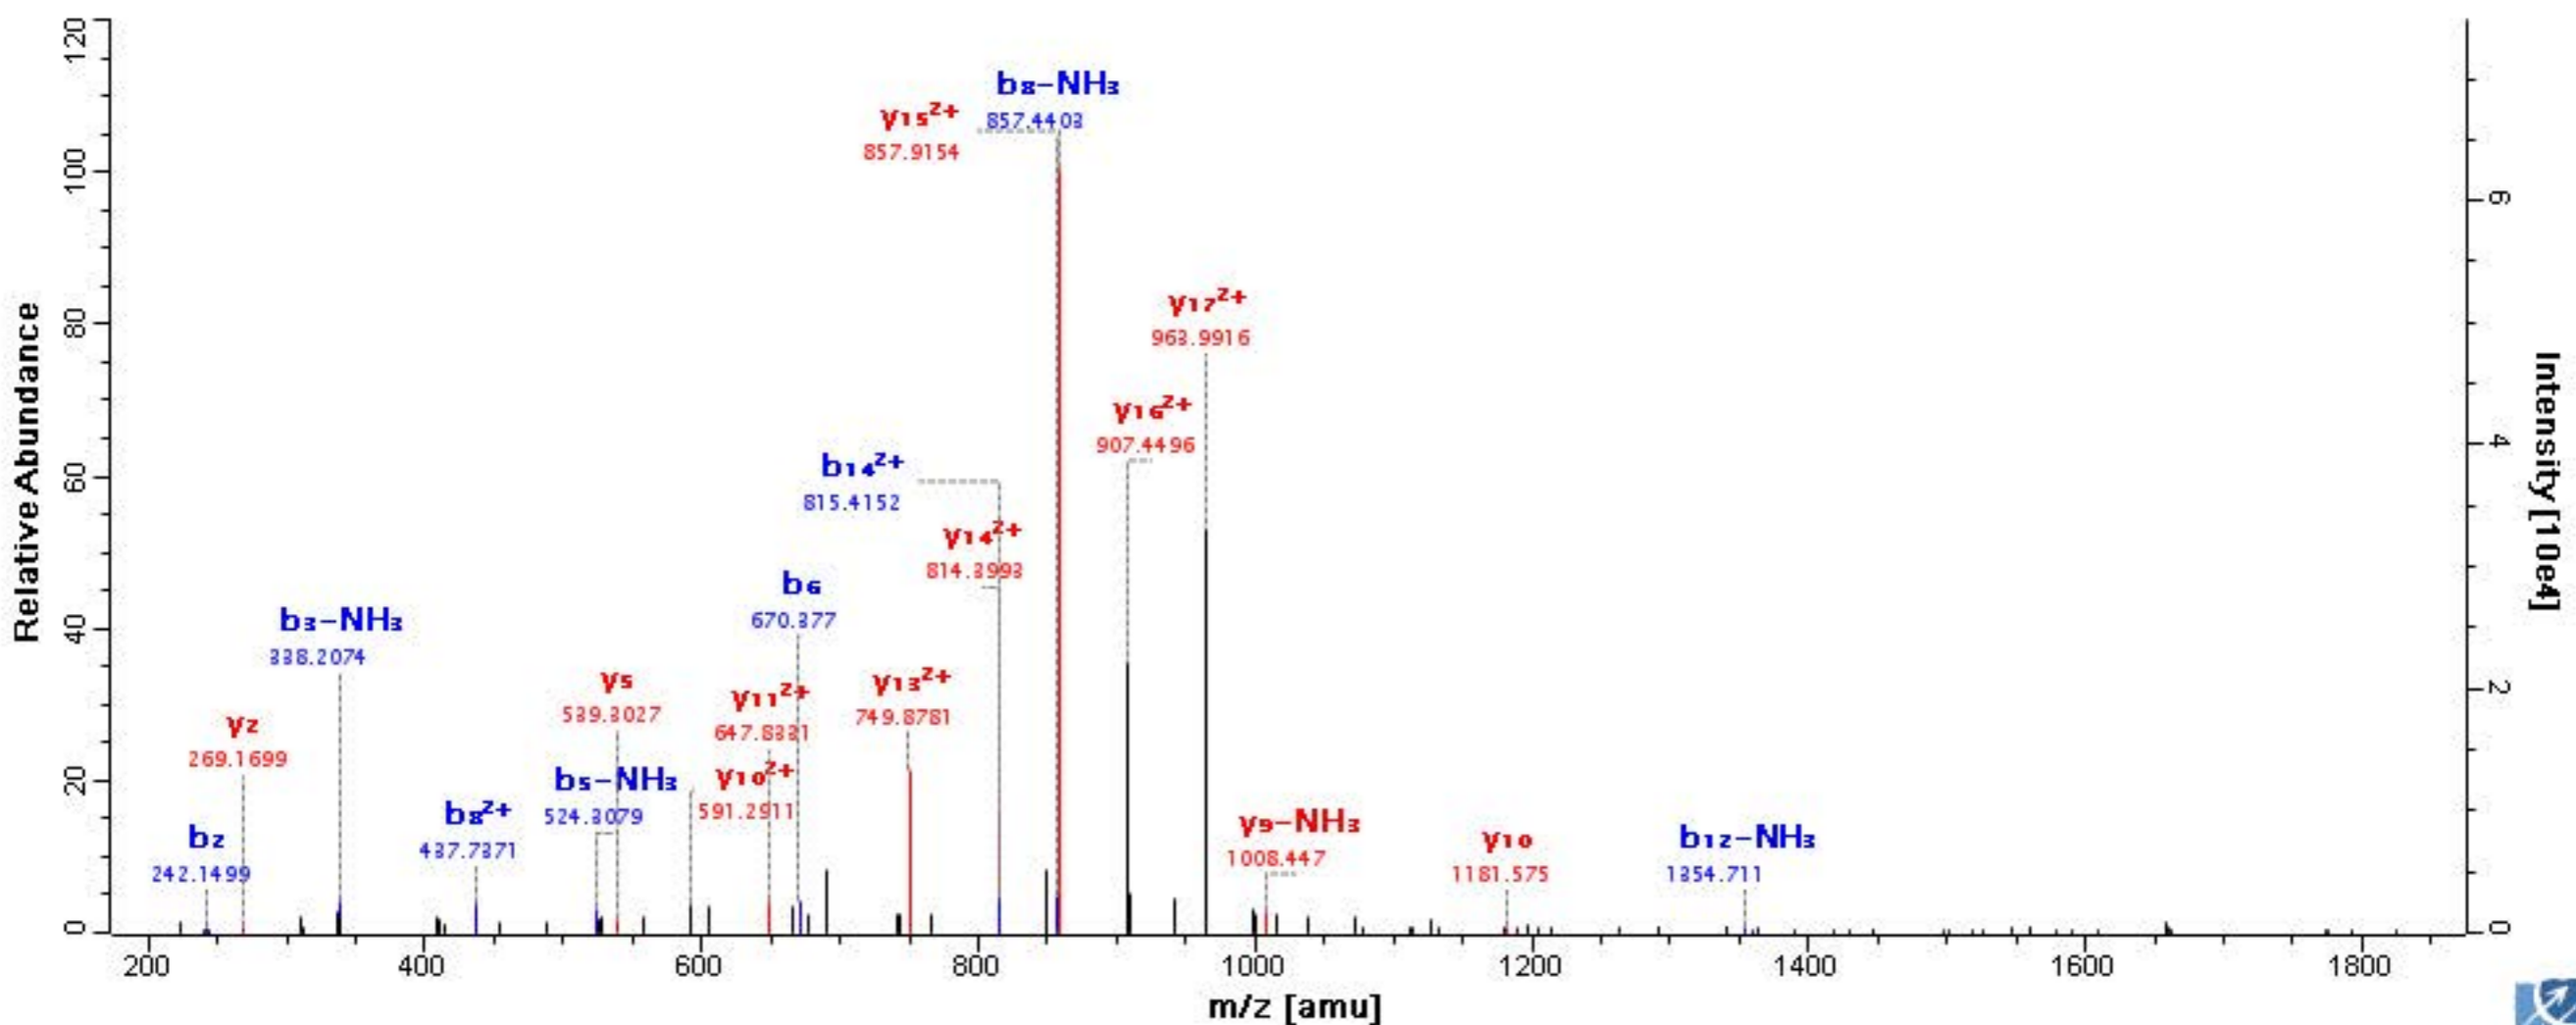

precursor information

|                   |                     |
|-------------------|---------------------|
| Mass:             | 2159.09751          |
| m/z:              | System.Collections. |
| Charge:           | System.Collections. |
| Retentiontime:    | System.Collections. |
| Score:            | 55.75485            |
| Mass Error [ppm]: | 0.19043             |
| PEP:              | 0.0016215           |
| Precursor Type:   | MULTI               |

| b <sup>2+</sup> ion |          | b ion     |          | seq |   | y ion    |          | y <sup>2+</sup> ion |          |
|---------------------|----------|-----------|----------|-----|---|----------|----------|---------------------|----------|
| Δ dalton            | mass     | Δ dalton  | mass     |     |   | Δ dalton | mass     | Δ dalton            | mass     |
|                     | 129.0659 |           | 129.0659 | 1   | Q | 18       |          |                     |          |
|                     | 242.1499 | +0.087036 | 242.1499 | 2   | I | 17       | 2040.06  |                     | 2040.06  |
|                     | 355.234  |           | 355.234  | 3   | I | 16       | 1926.976 |                     | 963.9916 |
|                     | 454.3024 |           | 454.3024 | 4   | V | 15       | 1813.892 |                     | 907.4496 |
|                     | 541.3344 |           | 541.3344 | 5   | S | 14       | 1714.823 |                     | 857.9154 |
|                     | 670.377  | +0.324521 | 670.377  | 6   | E | 13       | 1627.791 |                     | 814.3993 |
|                     | 727.3985 |           | 727.3985 | 7   | G | 12       | 1498.749 |                     | 749.8781 |
| -0.297022           | 437.7371 |           | 874.4669 | 8   | F | 11       | 1441.727 |                     | 1441.727 |
|                     | 987.551  |           | 987.551  | 9   | I | 10       | 1294.659 |                     | 647.8331 |
|                     | 1143.652 |           | 1143.652 | 10  | R | 9        | 1181.575 | +0.400698           | 591.2911 |
|                     | 1257.695 |           | 1257.695 | 11  | N | 8        | 1025.474 |                     | 1025.474 |
|                     | 1371.738 |           | 1371.738 | 12  | N | 7        | 911.4308 |                     | 911.4308 |
|                     | 1500.781 |           | 1500.781 | 13  | E | 6        | 797.3879 |                     | 797.3879 |
| -0.331393           | 815.4152 |           | 1629.823 | 14  | E | 5        | 668.3453 |                     | 668.3453 |
|                     | 1743.866 |           | 1743.866 | 15  | N | 4        | 539.3027 | -0.011354           | 539.3027 |
|                     | 1800.888 |           | 1800.888 | 16  | G | 3        | 425.2598 |                     | 425.2598 |
|                     | 1899.956 |           | 1899.956 | 17  | V | 2        | 368.2383 |                     | 368.2383 |
|                     | 2013.999 |           | 2013.999 | 18  | N | 1        | 269.1699 | -0.018258           | 269.1699 |
|                     |          |           |          | 19  | K | 0        | 155.127  |                     | 155.127  |

general information

|                       |             |
|-----------------------|-------------|
| Annotation:           | 14 of 19    |
| AminoAcids Coverag    | 74%         |
| Intensity Coverage:   | 53%         |
| Protein Localisation: | 173 ... 191 |

Source: 20120602\_VR\_Bsu\_TripleSILAC\_WTPPrkCPrpC\_OG\_F03  
 Scannumber: 25921  
 Protein: BSU19240; yocK  
 Peptide Score: 68.28  
 Method: ITMS; CID; 3

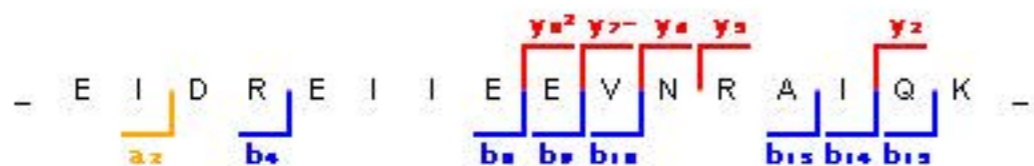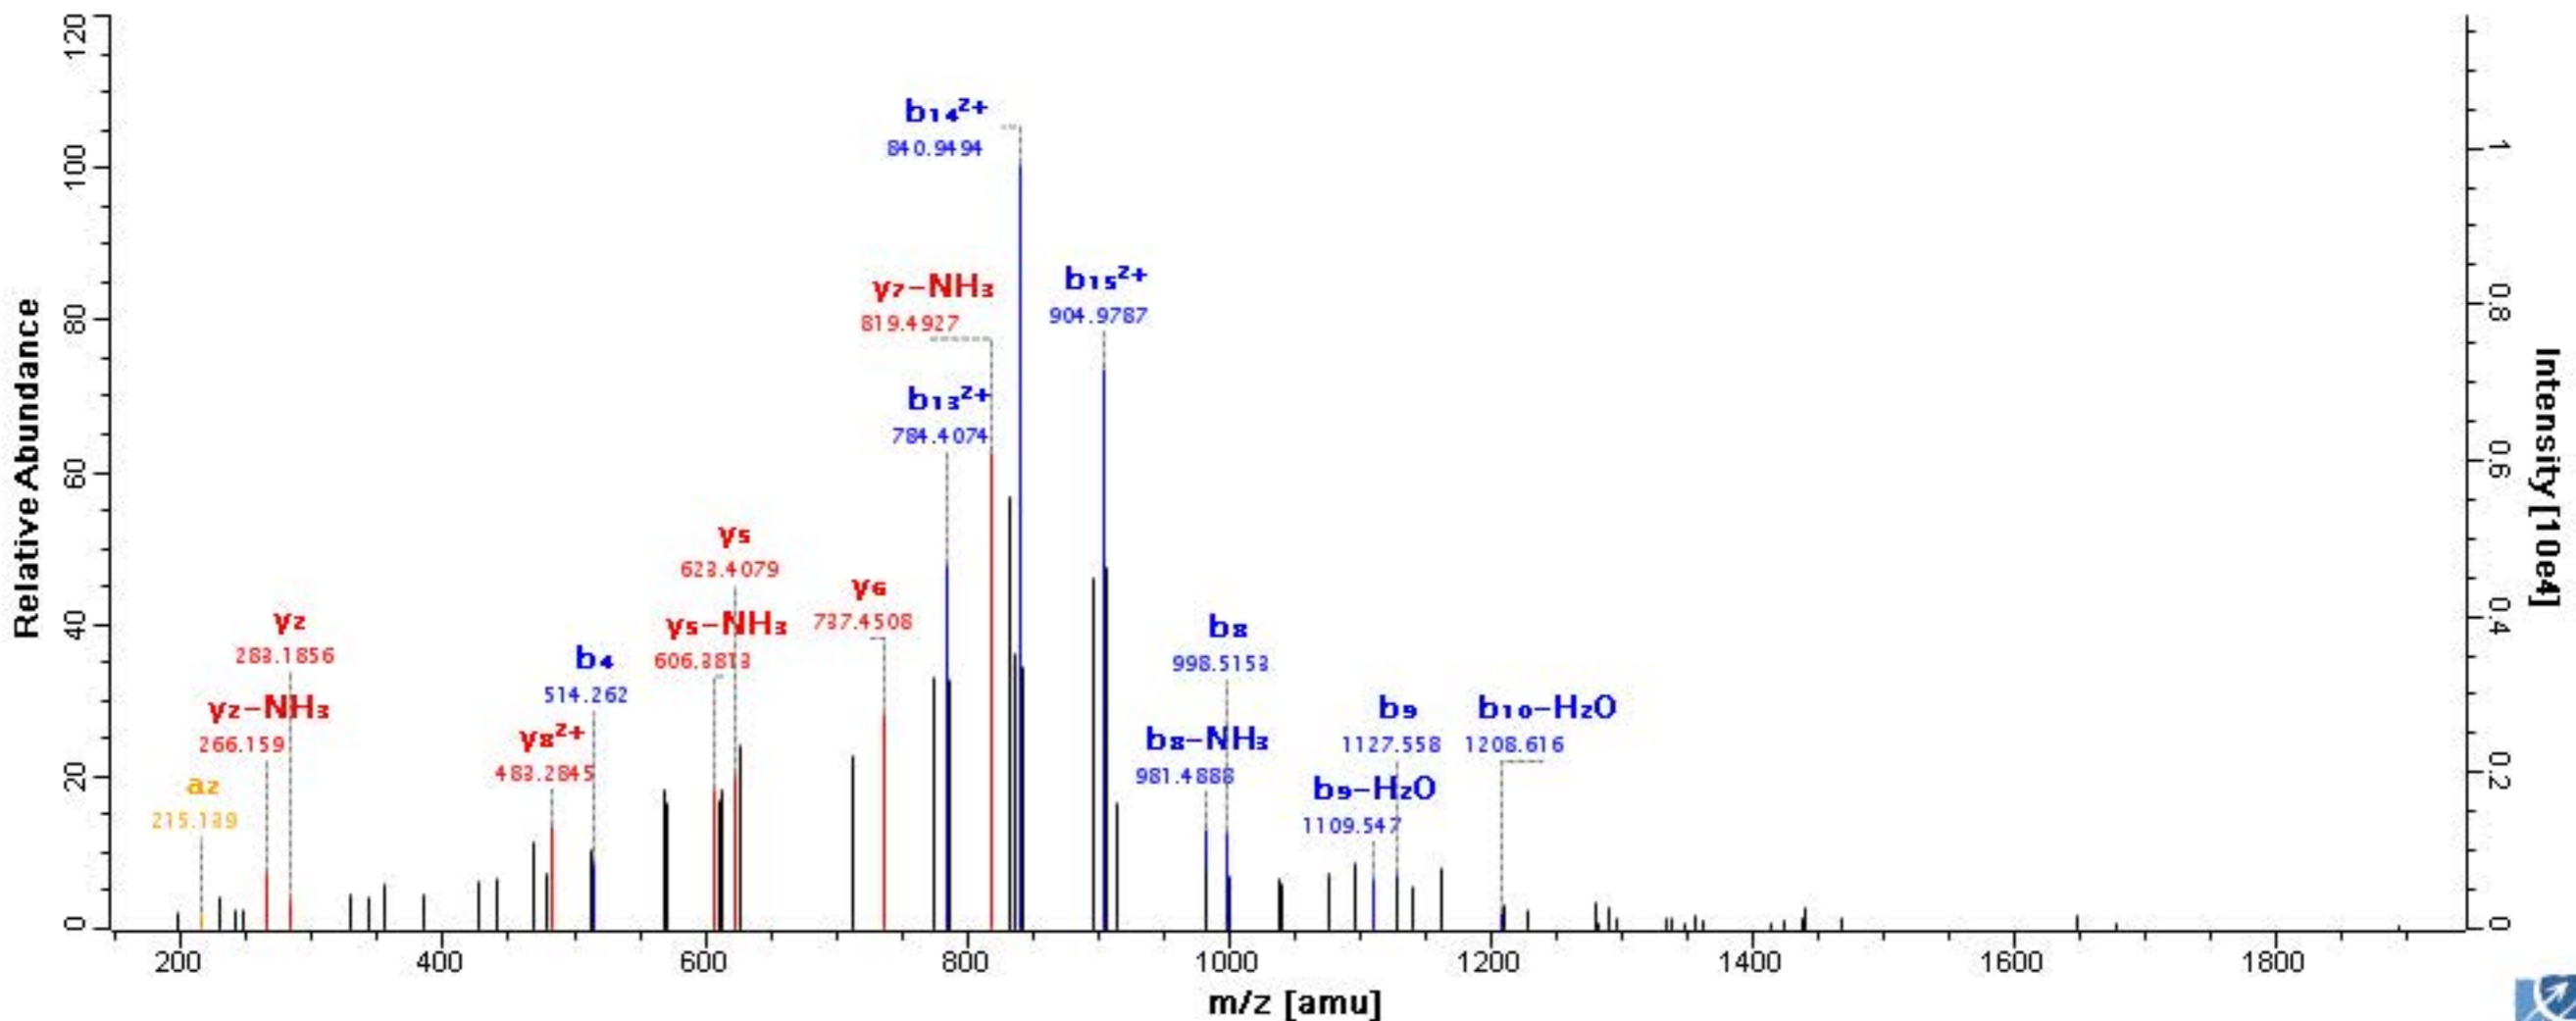

#### precursor information

|                   |                     |
|-------------------|---------------------|
| Mass:             | 1954.04934          |
| m/z:              | System.Collections. |
| Charge:           | System.Collections. |
| Retentiontime:    | System.Collections. |
| Score:            | 68.27738            |
| Mass Error [ppm]: | 0.50432             |
| PEP:              | 0.00037955          |
| Precursor Type:   | MULTI               |

#### general information

|                       |           |
|-----------------------|-----------|
| Annotation:           | 10 of 16  |
| AminoAcids Coverage:  | 62 %      |
| Intensity Coverage:   | 41 %      |
| Protein Localisation: | 65 ... 80 |

| a ion    |         | b <sup>2+</sup> ion |         | b ion    |         |    |     |    | y ion    |          | y <sup>2+</sup> ion |          |
|----------|---------|---------------------|---------|----------|---------|----|-----|----|----------|----------|---------------------|----------|
| Δ dalton | mass    | Δ dalton            | mass    | Δ dalton | mass    |    | seq |    | Δ dalton | mass     | Δ dalton            | mass     |
|          | 102.055 |                     | 130.05  |          | 130.05  | 1  | E   | 15 |          |          |                     |          |
| +0.00132 | 215.139 |                     | 243.134 |          | 243.134 | 2  | I   | 14 | 1834.03  |          | 1834.03             |          |
|          | 330.166 |                     | 358.161 |          | 358.161 | 3  | D   | 13 | 1720.94  |          | 1720.94             |          |
|          | 486.267 |                     | 514.262 | +0.06644 | 514.262 | 4  | R   | 12 | 1605.92  |          | 1605.92             |          |
|          | 615.31  |                     | 643.305 |          | 643.305 | 5  | E   | 11 | 1449.82  |          | 1449.82             |          |
|          | 728.394 |                     | 756.389 |          | 756.389 | 6  | I   | 10 | 1320.77  |          | 1320.77             |          |
|          | 841.478 |                     | 869.473 |          | 869.473 | 7  | I   | 9  | 1207.69  |          | 1207.69             |          |
|          | 970.52  |                     | 998.515 | +0.11208 | 998.515 | 8  | E   | 8  | 1094.6   |          | 1094.6              |          |
|          | 1099.56 |                     | 1127.56 | +0.21579 | 1127.56 | 9  | E   | 7  | 965.562  |          | 483.285             | +0.23676 |
|          | 1198.63 |                     | 1226.63 |          | 1226.63 | 10 | V   | 6  | 836.519  |          | 836.519             |          |
|          | 1312.67 |                     | 1340.67 |          | 1340.67 | 11 | N   | 5  | 737.451  | +0.14393 | 737.451             |          |
|          | 1468.78 |                     | 1496.77 |          | 1496.77 | 12 | R   | 4  | 623.408  | +0.20523 | 623.408             |          |
|          | 1539.81 | +0.30564            | 784.407 |          | 1567.81 | 13 | A   | 3  | 467.307  |          | 467.307             |          |
|          | 1652.9  | +0.41248            | 840.949 |          | 1680.89 | 14 | I   | 2  | 396.27   |          | 396.27              |          |
|          | 1780.96 | +0.141              | 904.979 |          | 1808.95 | 15 | Q   | 1  | 283.186  | +0.07437 | 283.186             |          |
|          |         |                     |         |          |         | 16 | K   | 0  | 155.127  |          | 155.127             |          |

Source: 20120602\_VR\_Bsu\_TripleSILAC\_WTPPrkCPrpC\_OG\_F03  
 Scannumber: 31638  
 Protein: BSU28650; ysgA  
 Peptide Score: 119.96  
 Method: ITMS; CID; 3

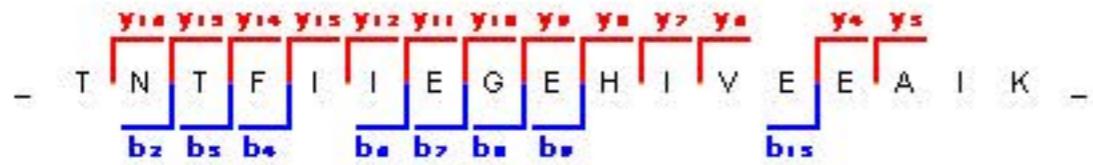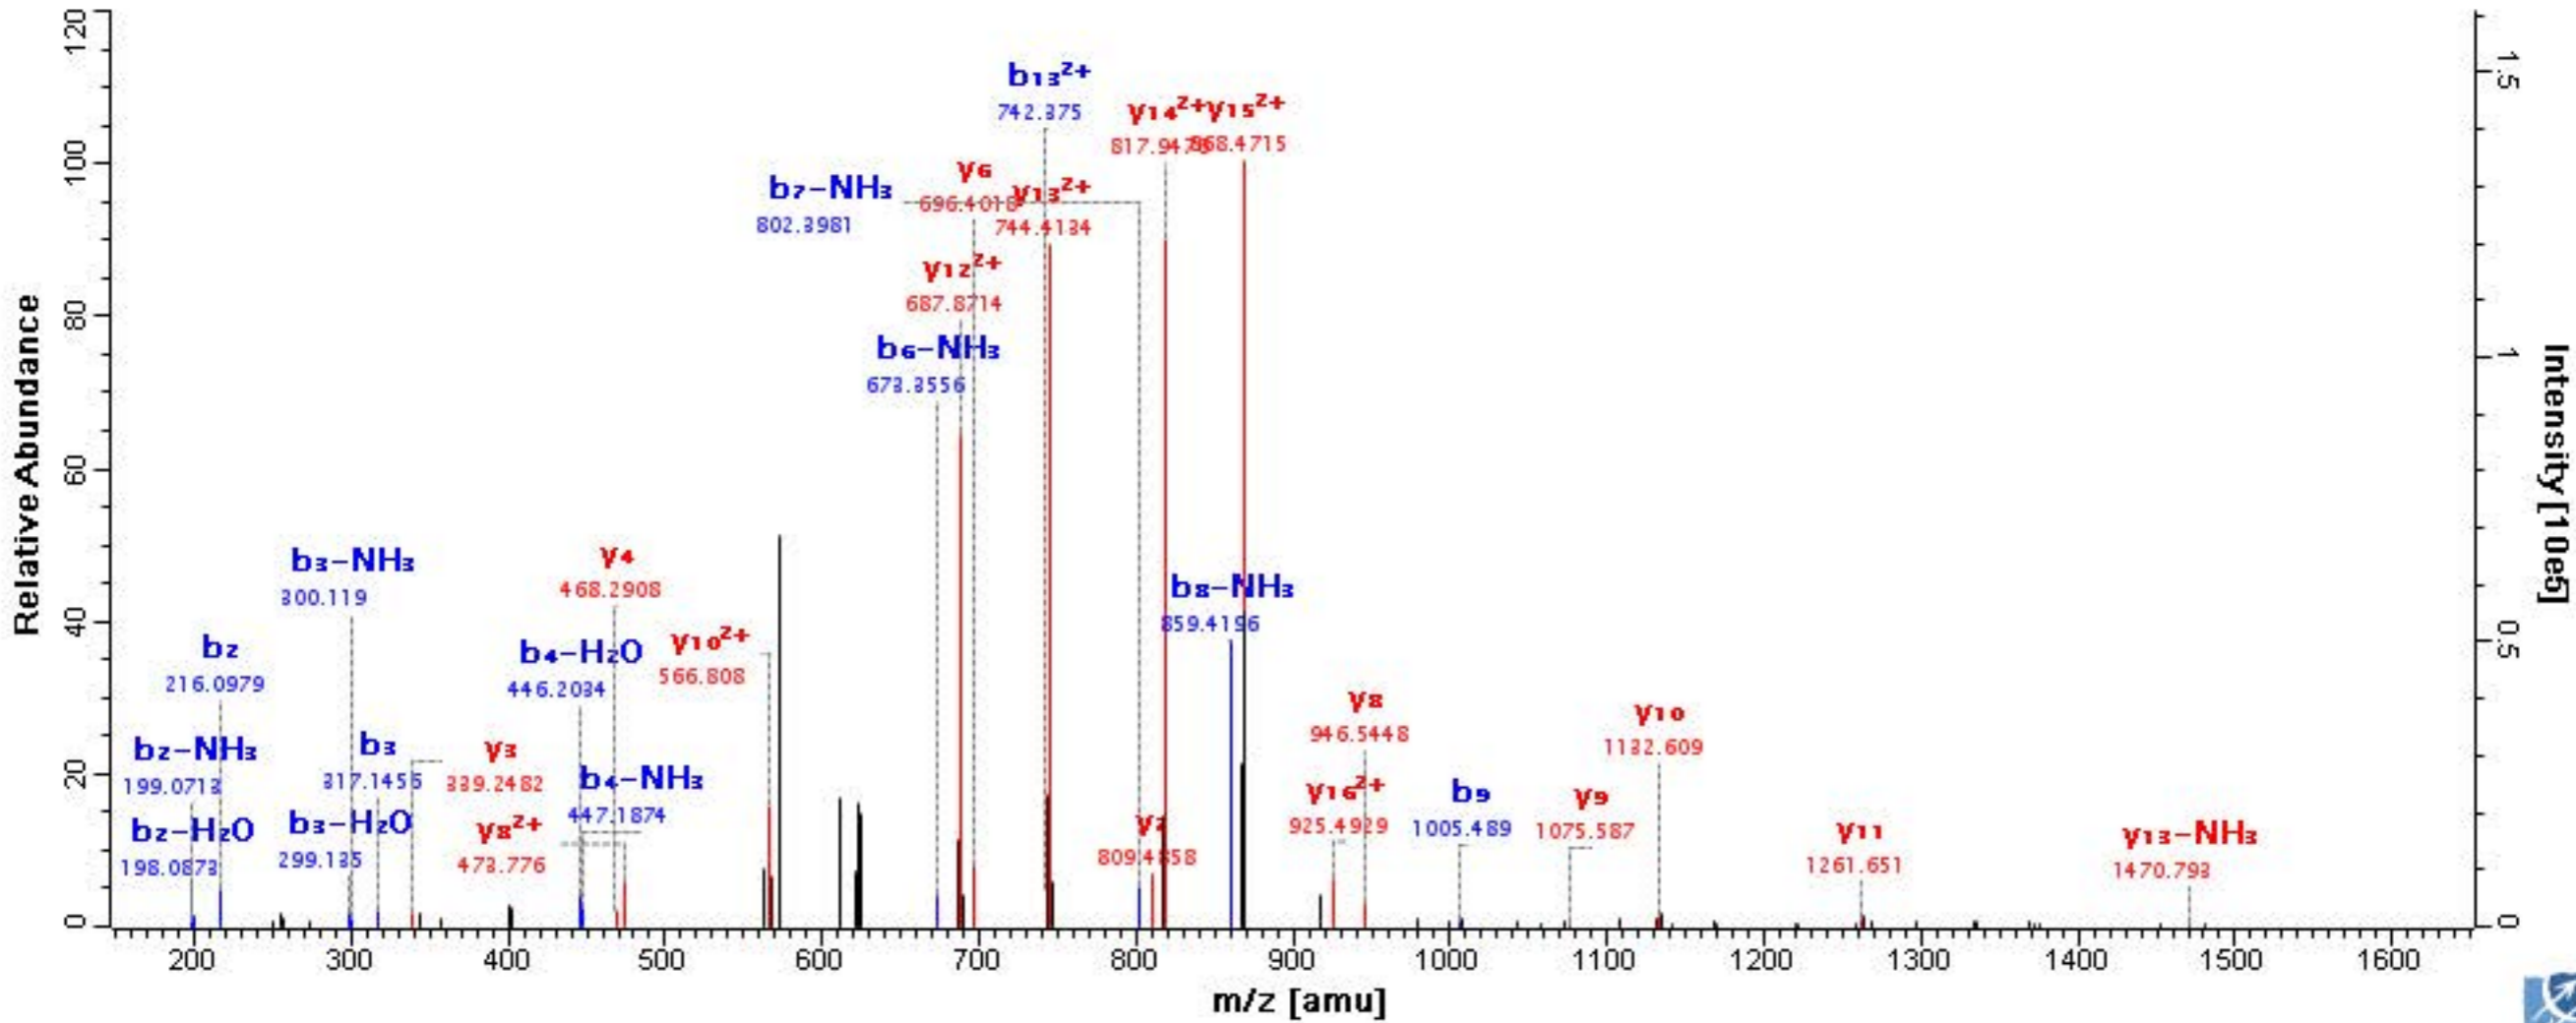

#### precursor information

|                   |                     |
|-------------------|---------------------|
| Mass:             | 1942.00467          |
| m/z:              | System.Collections. |
| Charge:           | System.Collections. |
| Retentiontime:    | System.Collections. |
| Score:            | 119.9631            |
| Mass Error [ppm]: | -0.04474            |
| PEP:              | 2.6342E-15          |
| Precursor Type:   | MULTI               |

| b <sup>2+</sup> ion |          | b ion     |          |     |   |          | y ion    |           | y <sup>2+</sup> ion |           |
|---------------------|----------|-----------|----------|-----|---|----------|----------|-----------|---------------------|-----------|
| Δ dalton            | mass     | Δ dalton  | mass     | seq |   | Δ dalton | mass     | Δ dalton  | mass                |           |
|                     | 102.055  |           | 102.055  | 1   | T | 16       |          |           |                     |           |
|                     | 216.0979 | -0.063306 | 216.0979 | 2   | N | 15       | 1849.979 |           | 925.4929            | +0.340825 |
|                     | 317.1456 | +0.068306 | 317.1456 | 3   | T | 14       | 1735.936 |           | 868.4715            | +0.19963  |
|                     | 464.214  |           | 464.214  | 4   | F | 13       | 1634.888 |           | 817.9476            | +0.38094  |
|                     | 577.298  |           | 577.298  | 5   | I | 12       | 1487.82  |           | 744.4134            | +0.359422 |
|                     | 690.3821 |           | 690.3821 | 6   | I | 11       | 1374.735 |           | 687.8714            | +0.290431 |
|                     | 819.4247 |           | 819.4247 | 7   | E | 10       | 1261.651 | +0.167929 | 1261.651            |           |
|                     | 876.4462 |           | 876.4462 | 8   | G | 9        | 1132.609 | +0.174145 | 566.808             | +0.152038 |
|                     | 1005.489 | +0.310564 | 1005.489 | 9   | E | 8        | 1075.587 | +0.087577 | 1075.587            |           |
|                     | 1142.548 |           | 1142.548 | 10  | H | 7        | 946.5448 | -0.011309 | 473.776             | +0.197677 |
|                     | 1255.632 |           | 1255.632 | 11  | I | 6        | 809.4858 | +0.153743 | 809.4858            |           |
|                     | 1354.7   |           | 1354.7   | 12  | V | 5        | 696.4018 | +0.133436 | 696.4018            |           |
| +0.450372           | 742.375  |           | 1483.743 | 13  | E | 4        | 597.3334 |           | 597.3334            |           |
|                     | 1612.785 |           | 1612.785 | 14  | E | 3        | 468.2908 | +0.091184 | 468.2908            |           |
|                     | 1683.822 |           | 1683.822 | 15  | A | 2        | 339.2482 | -0.012616 | 339.2482            |           |
|                     | 1796.907 |           | 1796.907 | 16  | I | 1        | 268.2111 |           | 268.2111            |           |
|                     |          |           |          | 17  | K | 0        | 155.127  |           | 155.127             |           |

#### general information

|                       |           |
|-----------------------|-----------|
| Annotation:           | 14 of 17  |
| AminoAcids Coverag    | 82 %      |
| Intensity Coverage:   | 62 %      |
| Protein Localisation: | 27 ... 43 |

Source: 201 20602\_VR\_Bsu\_TripleSILAC\_WTPPrkCPrpC\_OG\_F04  
 Scannumber: 11041  
 Protein: BSU02270; pss; pssA  
 Peptide Score: 209.97  
 Method: ITMS; CID; 3

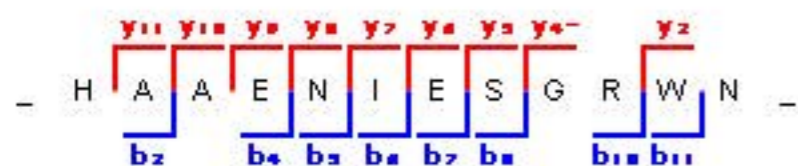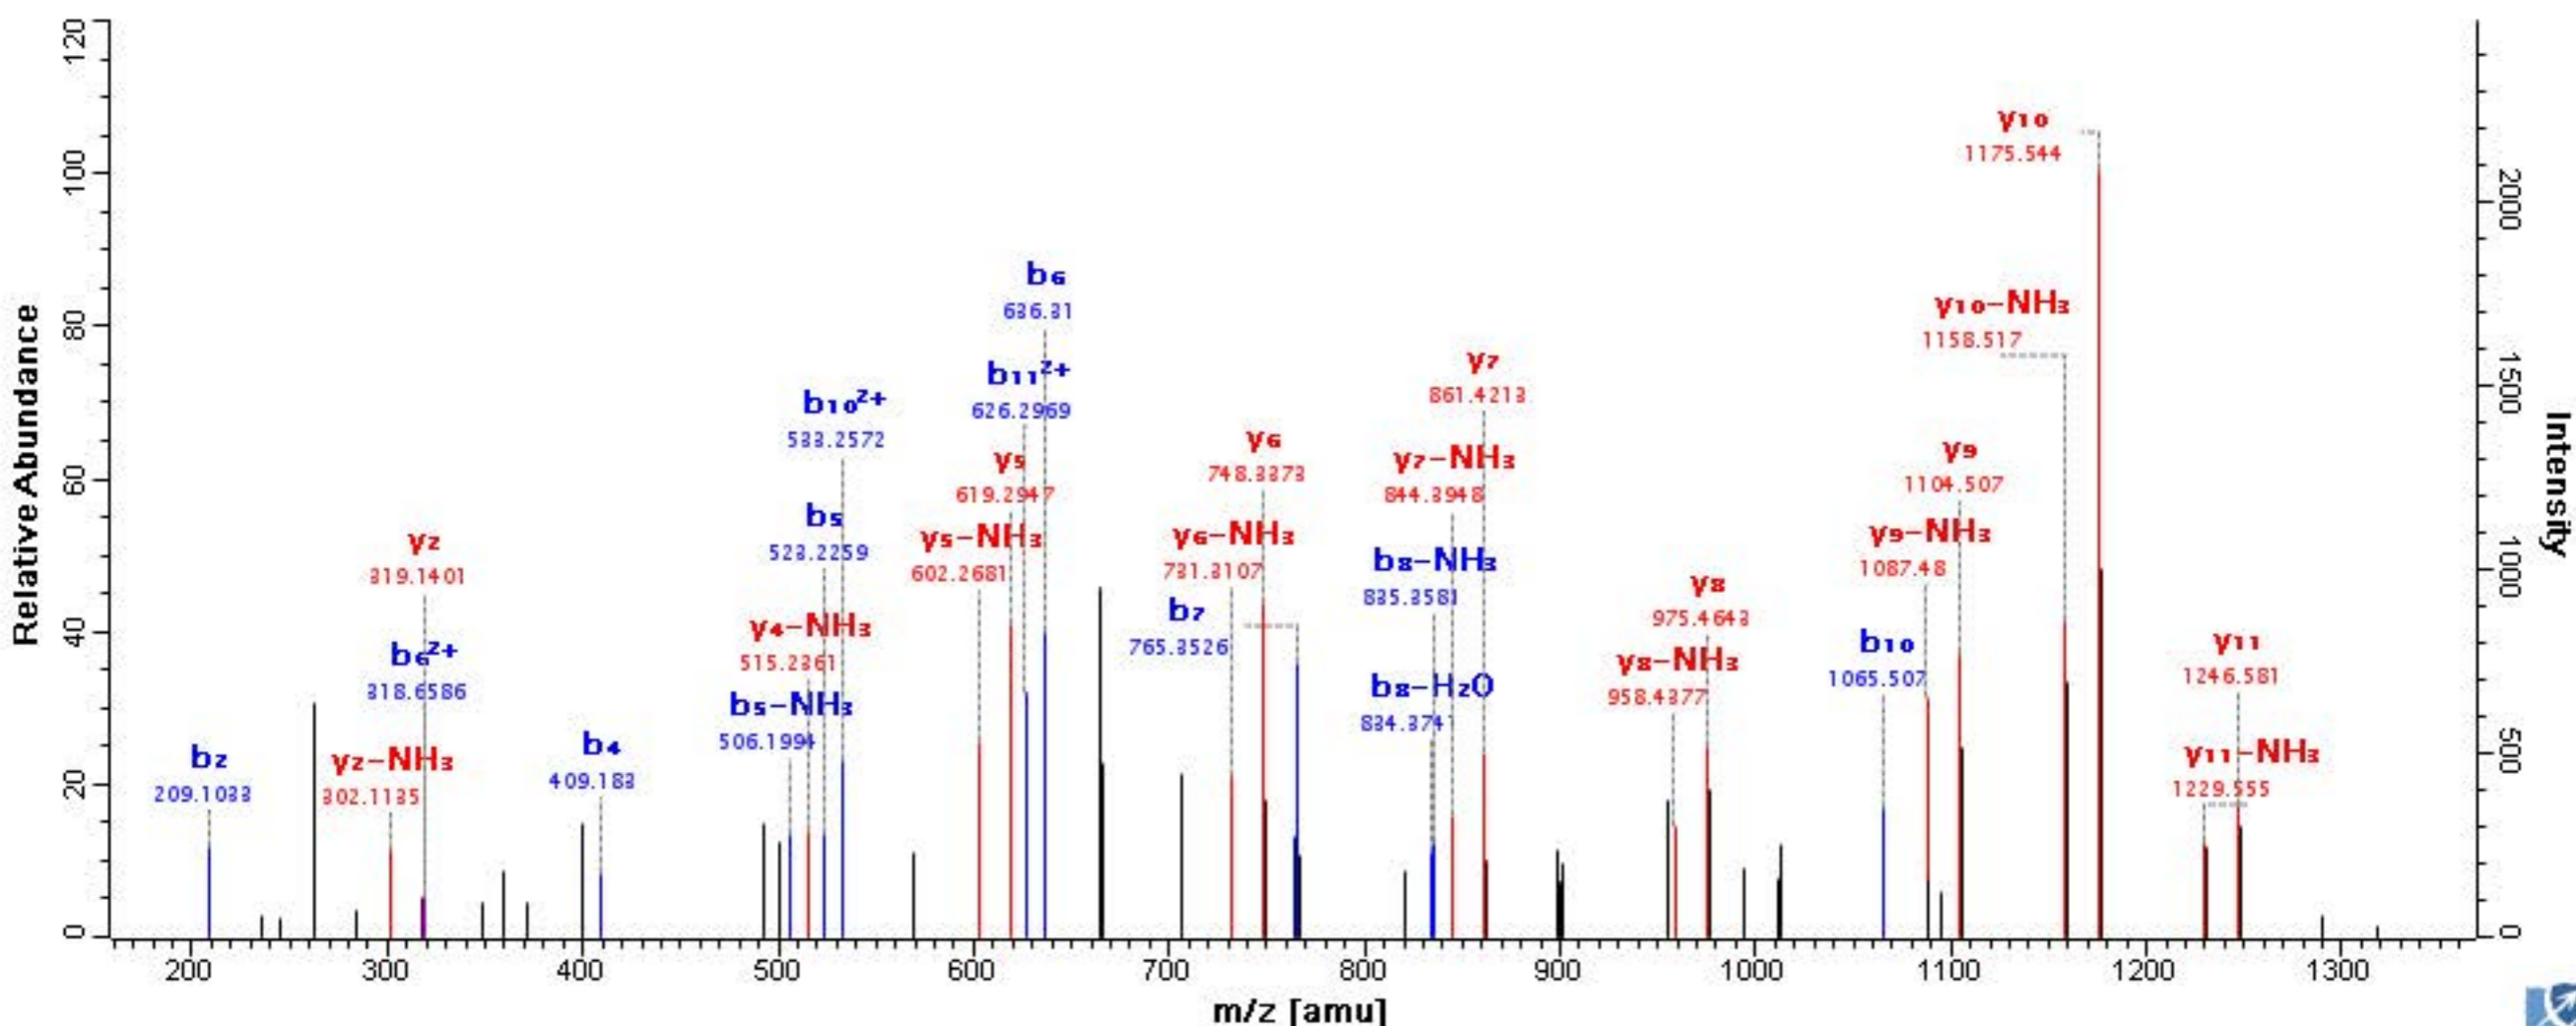

#### precursor information

|                   |                     |
|-------------------|---------------------|
| Mass:             | 1382.63112          |
| m/z:              | System.Collections. |
| Charge:           | System.Collections. |
| Retentiontime:    | System.Collections. |
| Score:            | 209.9664            |
| Mass Error [ppm]: | -1.1589             |
| PEP:              | 5.9292E-126         |
| Precursor Type:   | ISO                 |

#### general information

|                       |             |
|-----------------------|-------------|
| Annotation:           | 10 of 12    |
| AminoAcids Coverag    | 83 %        |
| Intensity Coverage:   | 58 %        |
| Protein Localisation: | 166 ... 177 |

| b <sup>2+</sup> ion |              | b ion      |              |     | y ion |          |                         |
|---------------------|--------------|------------|--------------|-----|-------|----------|-------------------------|
| Δ dalton            | mass         | Δ dalton   | mass         | seq |       | Δ dalton | mass                    |
|                     | 138.06618833 |            | 138.06618833 | 1   | H     | 11       |                         |
|                     | 209.10330212 | -0.0873567 | 209.10330212 | 2   | A     | 10       | 1246.5810899 +0.1211806 |
|                     | 280.1404159  |            | 280.1404159  | 3   | A     | 9        | 1175.5439761 +0.0038754 |
|                     | 409.183009   | -0.0118664 | 409.183009   | 4   | E     | 8        | 1104.5068623 +0.172459  |
|                     | 523.22593645 | +0.167252  | 523.22593645 | 5   | N     | 7        | 975.46426924 +0.1613411 |
| -0.3445515          | 318.65863845 | +0.0567598 | 636.31000043 | 6   | I     | 6        | 861.42134179 +0.0841514 |
|                     | 765.35259352 | +0.1729192 | 765.35259352 | 7   | E     | 5        | 748.33727781 +0.1212183 |
|                     | 852.38462193 |            | 852.38462193 | 8   | S     | 4        | 619.29468472 +0.1500785 |
|                     | 909.40608566 |            | 909.40608566 | 9   | G     | 3        | 532.26265631            |
| +0.1102561          | 533.25723658 | +0.2915094 | 1065.5071967 | 10  | R     | 2        | 475.24119258            |
| +0.0775576          | 626.29689305 |            | 1251.5865096 | 11  | W     | 1        | 319.14008155 +0.2095889 |
|                     |              |            |              | 12  | N     | 0        | 133.0607686             |

Source: 20120602\_VR\_Bsu\_TripleSILAC\_WTPPrkCPrpC\_OG\_F04  
 Scannumber: 26979  
 Protein: BSU31140; cdoA; yubC  
 Peptide Score: 148.07  
 Method: ITMS; CID; 3

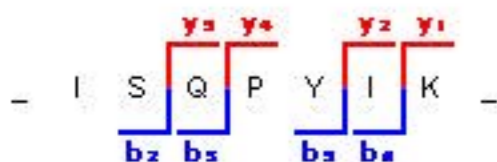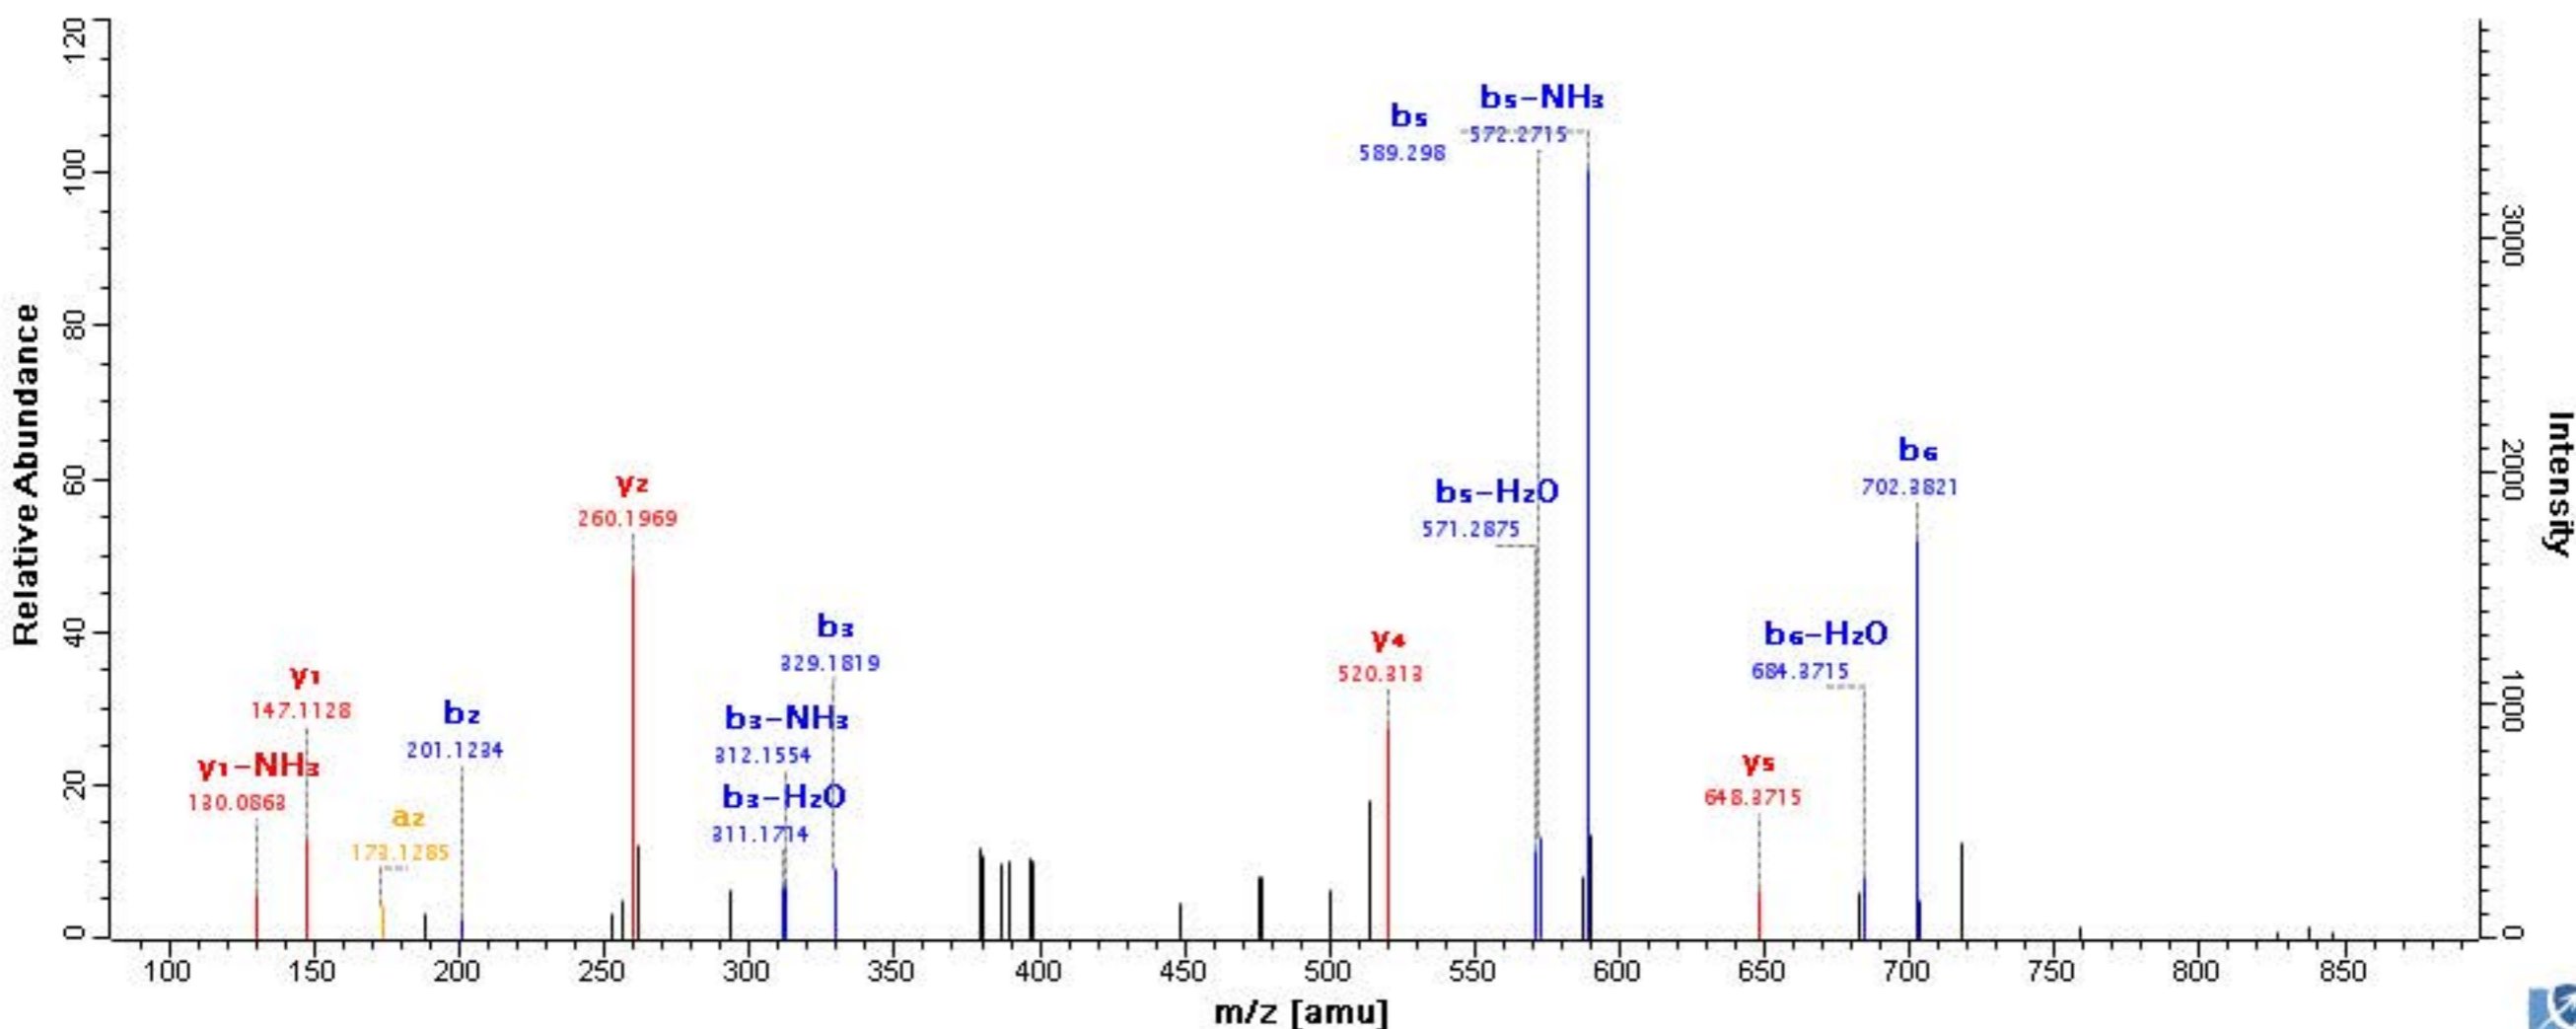

#### precursor information

|                       |                     |
|-----------------------|---------------------|
| Mass:                 | 847.48065           |
| m/z:                  | System.Collections. |
| Charge:               | System.Collections. |
| Retentiontime:        | System.Collections. |
| Score:                | 148.068             |
| Mass Error [ppm]:     | 0.35071             |
| g PFP:                | 1.5327E-14          |
| Annotation:           | 6 of 7              |
| AminoAcids Coverag    | 86 %                |
| Intensity Coverage:   | 63 %                |
| Protein Localisation: | 35 ... 41           |

| a ion      |              | b ion      |              |   |     |   | y ion        |            |
|------------|--------------|------------|--------------|---|-----|---|--------------|------------|
| Δ dalton   | mass         | Δ dalton   | mass         |   | seq |   | Δ dalton     | mass       |
|            | 86.096425825 |            | 114.09134045 | 1 | I   | 6 |              |            |
| +0.2128849 | 173.12845423 | +0.0325149 | 201.12336886 | 2 | S   | 5 | 735.40356646 |            |
|            | 301.18703175 | +0.0186762 | 329.18194637 | 3 | Q   | 4 | 648.37153805 | +0.1174756 |
|            | 398.2397956  |            | 426.23471022 | 4 | P   | 3 | 520.31296054 | +0.0360995 |
|            | 561.30312414 | +0.0958211 | 589.29803876 | 5 | Y   | 2 | 423.26019669 |            |
|            | 674.38718812 | +0.1120379 | 702.38210274 | 6 | I   | 1 | 260.19686815 | -0.0686638 |
|            |              |            |              | 7 | K   | 0 | 147.11280417 | +0.0188334 |

Source: 20120602\_VR\_Bsu\_TripleSILAC\_WTPPrkCPrpC\_OG\_F04  
 Scannumber: 32653  
 Protein: BSU37530; ywhC  
 Peptide Score: 195.27  
 Method: ITMS; CID; 3

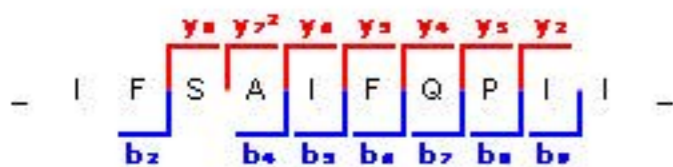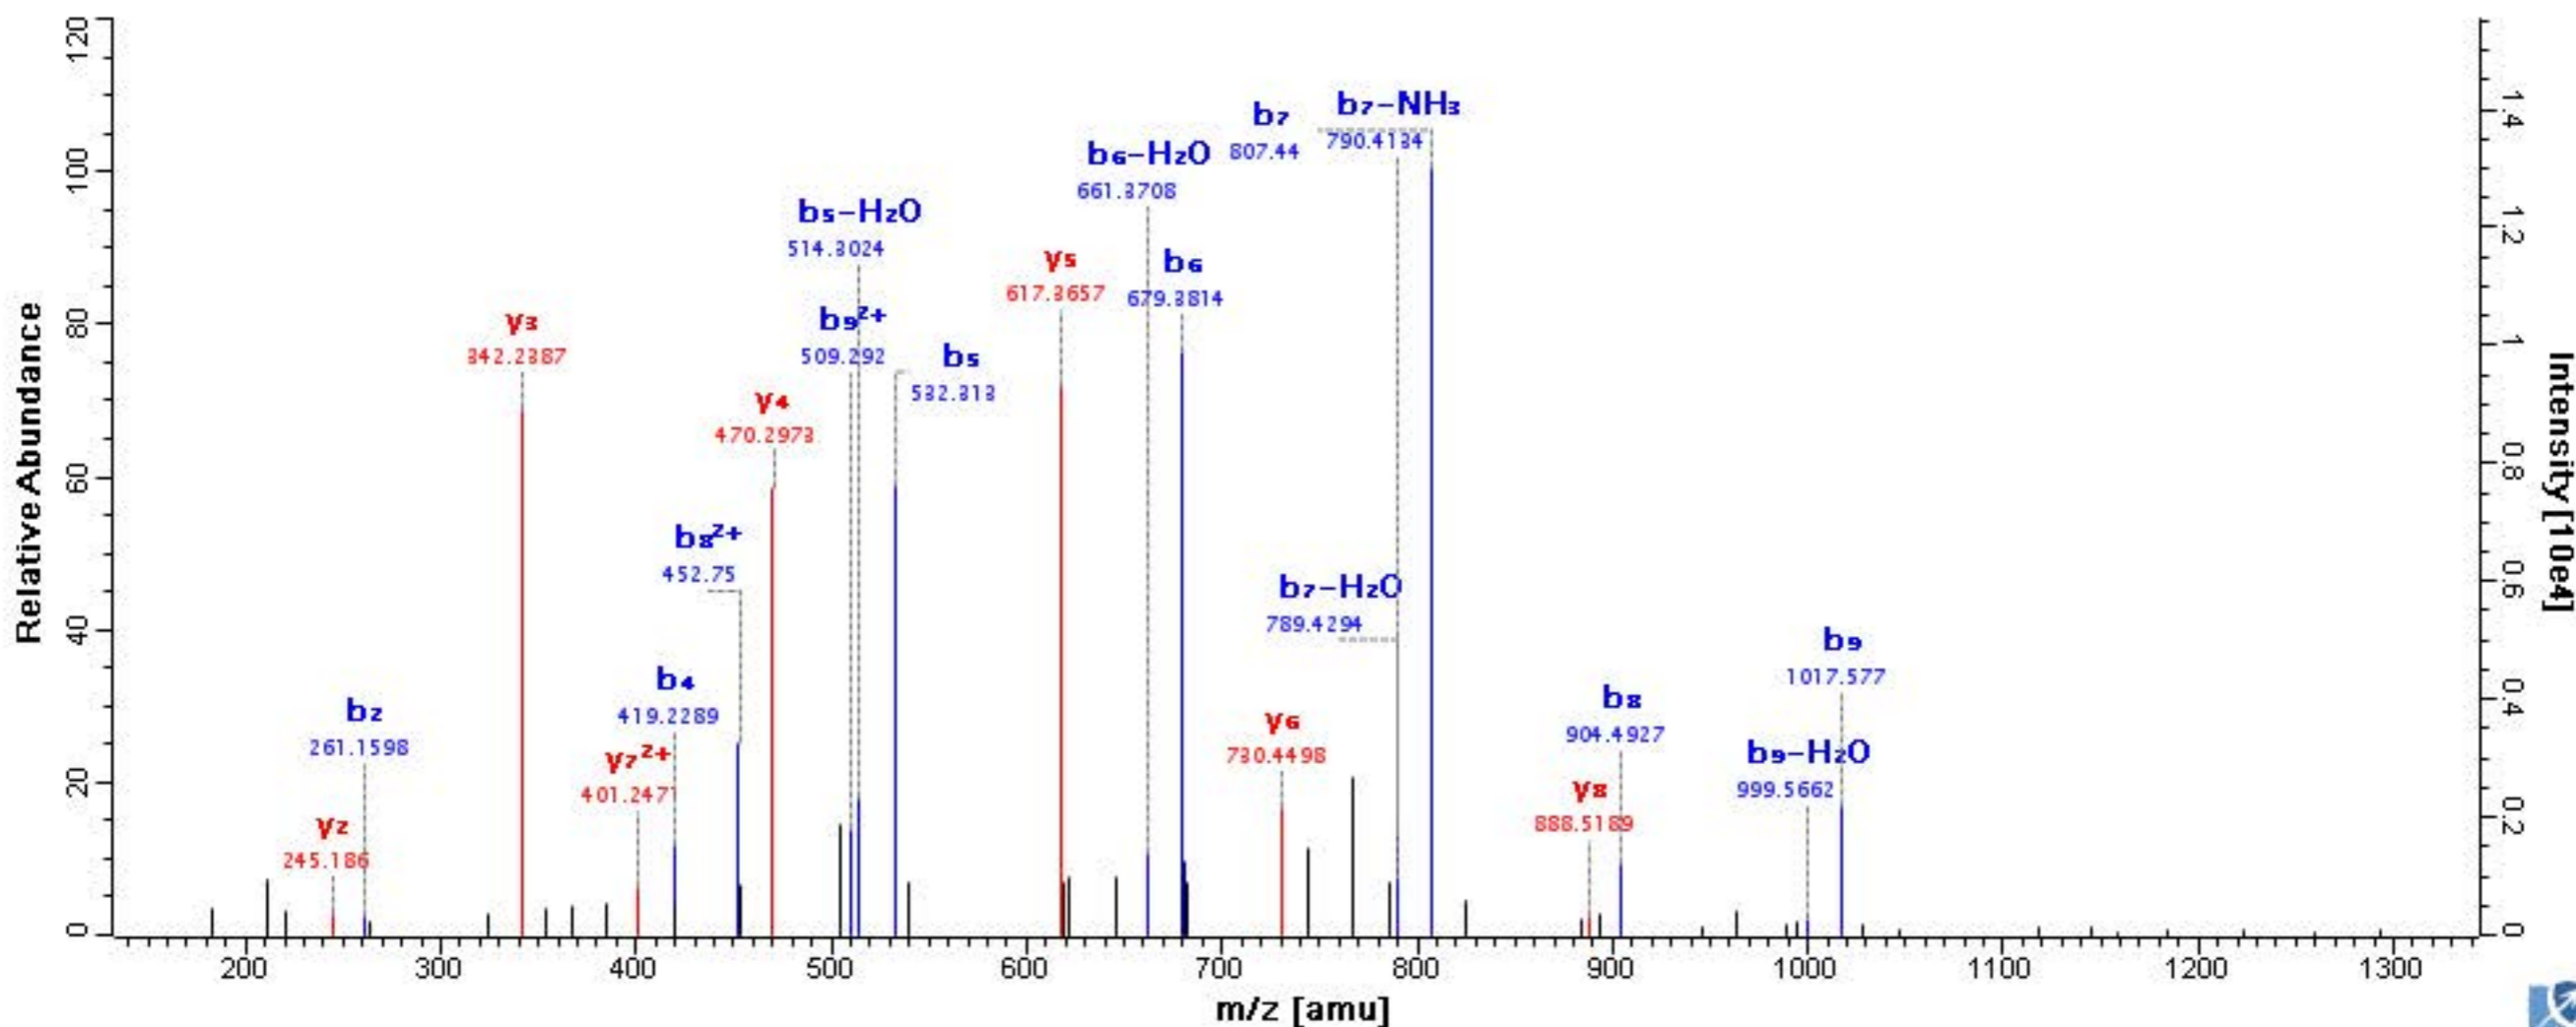

#### precursor information

|                   |                     |
|-------------------|---------------------|
| Mass:             | 1147.66349          |
| m/z:              | System.Collections. |
| Charge:           | System.Collections. |
| Retentiontime:    | System.Collections. |
| Score:            | 195.2698            |
| Mass Error [ppm]: | -0.56135            |
| PEP:              | 4.6121E-82          |
| Precursor Type:   | ISO                 |

#### general information

|                       |             |
|-----------------------|-------------|
| Annotation:           | 8 of 10     |
| AminoAcids Coverage:  | 80 %        |
| Intensity Coverage:   | 78 %        |
| Protein Localisation: | 210 ... 219 |

| b <sup>2+</sup> ion |          | b ion     |          |     | y ion |          | y <sup>2+</sup> ion |           |          |
|---------------------|----------|-----------|----------|-----|-------|----------|---------------------|-----------|----------|
| Δ dalton            | mass     | Δ dalton  | mass     | seq |       | Δ dalton | mass                | Δ dalton  | mass     |
|                     | 114.0913 |           | 114.0913 | 1   | I     |          |                     |           |          |
|                     | 261.1598 | +0.107915 | 261.1598 | 2   | F     | 8        | 1035.587            |           | 1035.587 |
|                     | 348.1918 |           | 348.1918 | 3   | S     | 7        | 888.5189            | +0.147512 | 888.5189 |
|                     | 419.2289 | +0.172654 | 419.2289 | 4   | A     | 6        | 801.4869            |           | 401.2471 |
|                     | 532.313  | -0.014682 | 532.313  | 5   | I     | 5        | 730.4498            | +0.074504 | 730.4498 |
|                     | 679.3814 | +0.032322 | 679.3814 | 6   | F     | 4        | 617.3657            | -0.002748 | 617.3657 |
|                     | 807.44   | +0.026662 | 807.44   | 7   | Q     | 3        | 470.2973            | -0.070931 | 470.2973 |
| -0.239742           | 452.75   | +0.042196 | 904.4927 | 8   | P     | 2        | 342.2387            | -0.050623 | 342.2387 |
| +0.041956           | 509.292  | -0.057371 | 1017.577 | 9   | I     | 1        | 245.186             | -0.128321 | 245.186  |
|                     |          |           |          | 10  | I     | 0        | 132.1019            |           | 132.1019 |

Source: 20120602\_VR\_Bsu\_TripleSILAC\_WTPrkCPrpC\_OG\_F05  
 Scannumber: 16718  
 Protein: BSU18190; yngC  
 Peptide Score: 195.51  
 Method: ITMS; CID; 3

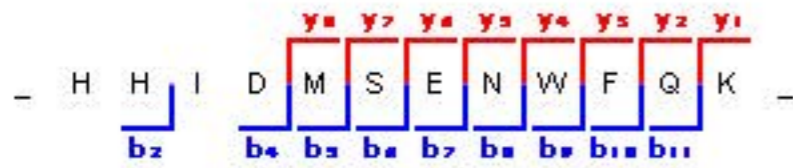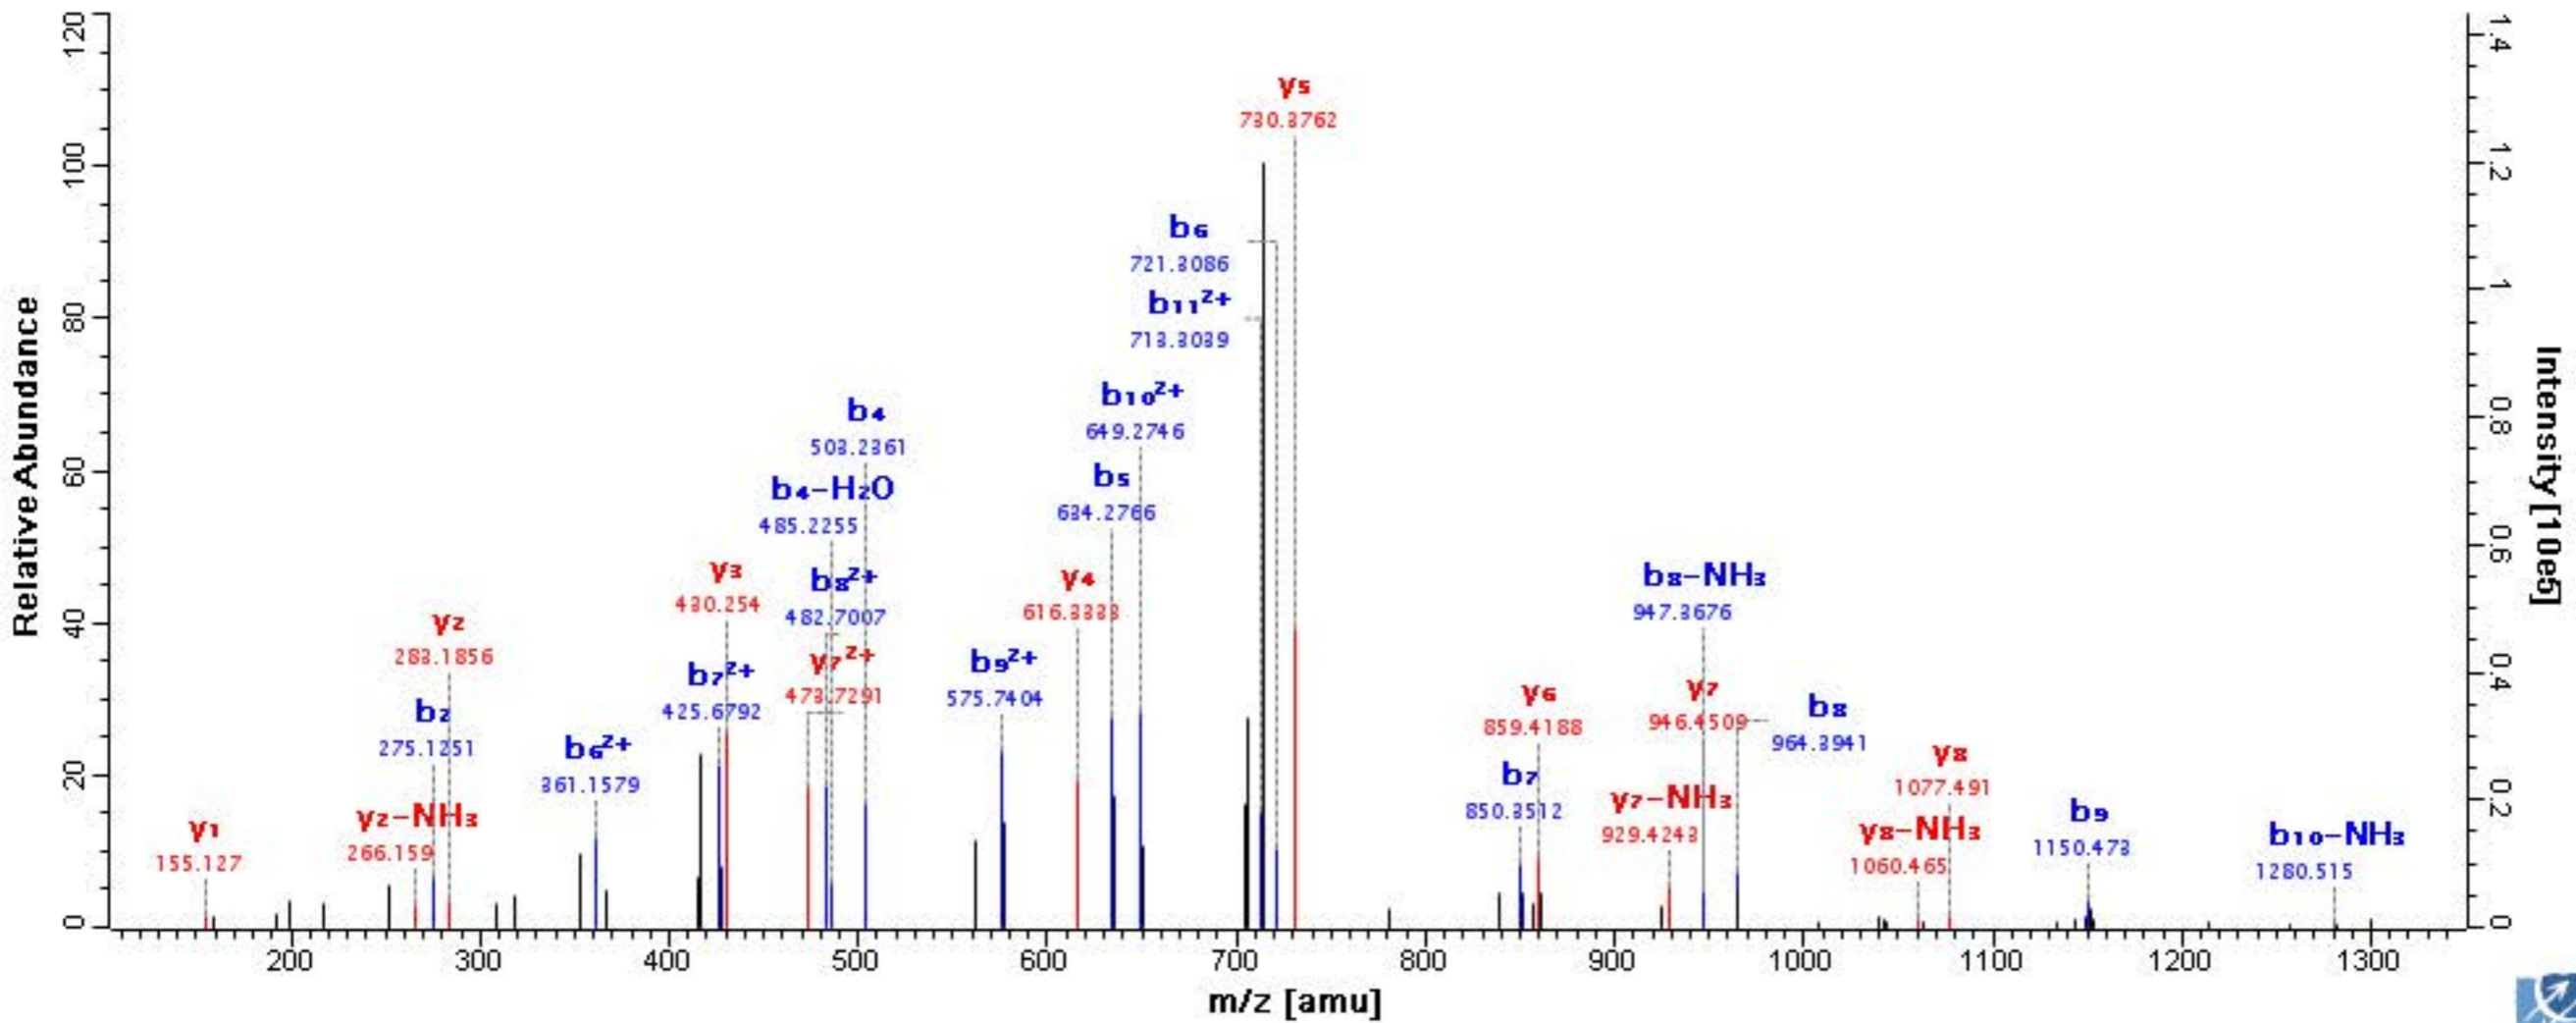

#### precursor information

|                   |                     |
|-------------------|---------------------|
| Mass:             | 1570.69748          |
| m/z:              | System.Collections. |
| Charge:           | System.Collections. |
| Retentiontime:    | System.Collections. |
| Score:            | 195.5109            |
| Mass Error [ppm]: | -0.76862            |
| PEP:              | 3.6315E-80          |
| Precursor Type:   | MULTI               |

#### general information

|                       |            |
|-----------------------|------------|
| Annotation:           | 10 of 12   |
| AminoAcids Coverage:  | 83 %       |
| Intensity Coverage:   | 52 %       |
| Protein Localisation: | 91 ... 102 |

| b <sup>2+</sup> ion |          | b ion     |          |    | seq |    | γ ion    |           | γ <sup>2+</sup> ion |           |
|---------------------|----------|-----------|----------|----|-----|----|----------|-----------|---------------------|-----------|
| Δ dalton            | mass     | Δ dalton  | mass     |    |     |    | Δ dalton | mass      | Δ dalton            | mass      |
|                     | 138.0662 |           | 138.0662 | 1  | H   | 11 |          |           |                     |           |
|                     | 275.1251 | -0.120095 | 275.1251 | 2  | H   | 10 | 1442.661 |           | 1442.661            |           |
|                     | 388.2092 |           | 388.2092 | 3  | I   | 9  | 1305.602 |           | 1305.602            |           |
|                     | 503.2361 | +0.149635 | 503.2361 | 4  | D   | 8  | 1192.518 |           | 1192.518            |           |
|                     | 634.2766 | -0.041179 | 634.2766 | 5  | M   | 7  | 1077.491 | +0.211296 | 1077.491            |           |
| +0.13148            | 361.1579 | +0.038609 | 721.3086 | 6  | S   | 6  | 946.4509 | +0.041392 | 473.7291            | +0.211974 |
| +0.384476           | 425.6792 | +0.082441 | 850.3512 | 7  | E   | 5  | 859.4188 | +0.042293 | 859.4188            |           |
| +0.30863            | 482.7007 | +0.191308 | 964.3941 | 8  | N   | 4  | 730.3762 | +0.055528 | 730.3762            |           |
| +0.03704            | 575.7404 | +0.073665 | 1150.473 | 9  | W   | 3  | 616.3333 | +0.005804 | 616.3333            |           |
| +0.315211           | 649.2746 |           | 1297.542 | 10 | F   | 2  | 430.254  | +0.188633 | 430.254             |           |
| -0.168851           | 713.3039 |           | 1425.6   | 11 | Q   | 1  | 283.1856 | +0.065152 | 283.1856            |           |
|                     |          |           |          | 12 | K   | 0  | 155.127  | -0.043598 | 155.127             |           |

Source: 20120602\_VR\_Bsu\_TripleSILAC\_WTPPrkCPrpC\_OG\_F05  
 Scannumber: 26746  
 Protein: BSU26300; yqa1  
 Peptide Score: 71.24  
 Method: ITMS; CID; 3

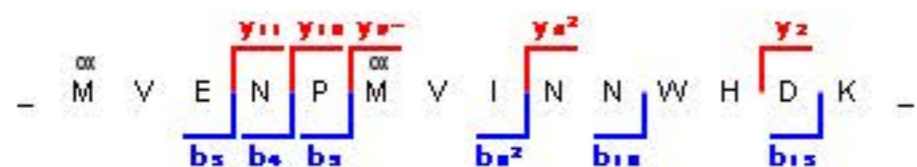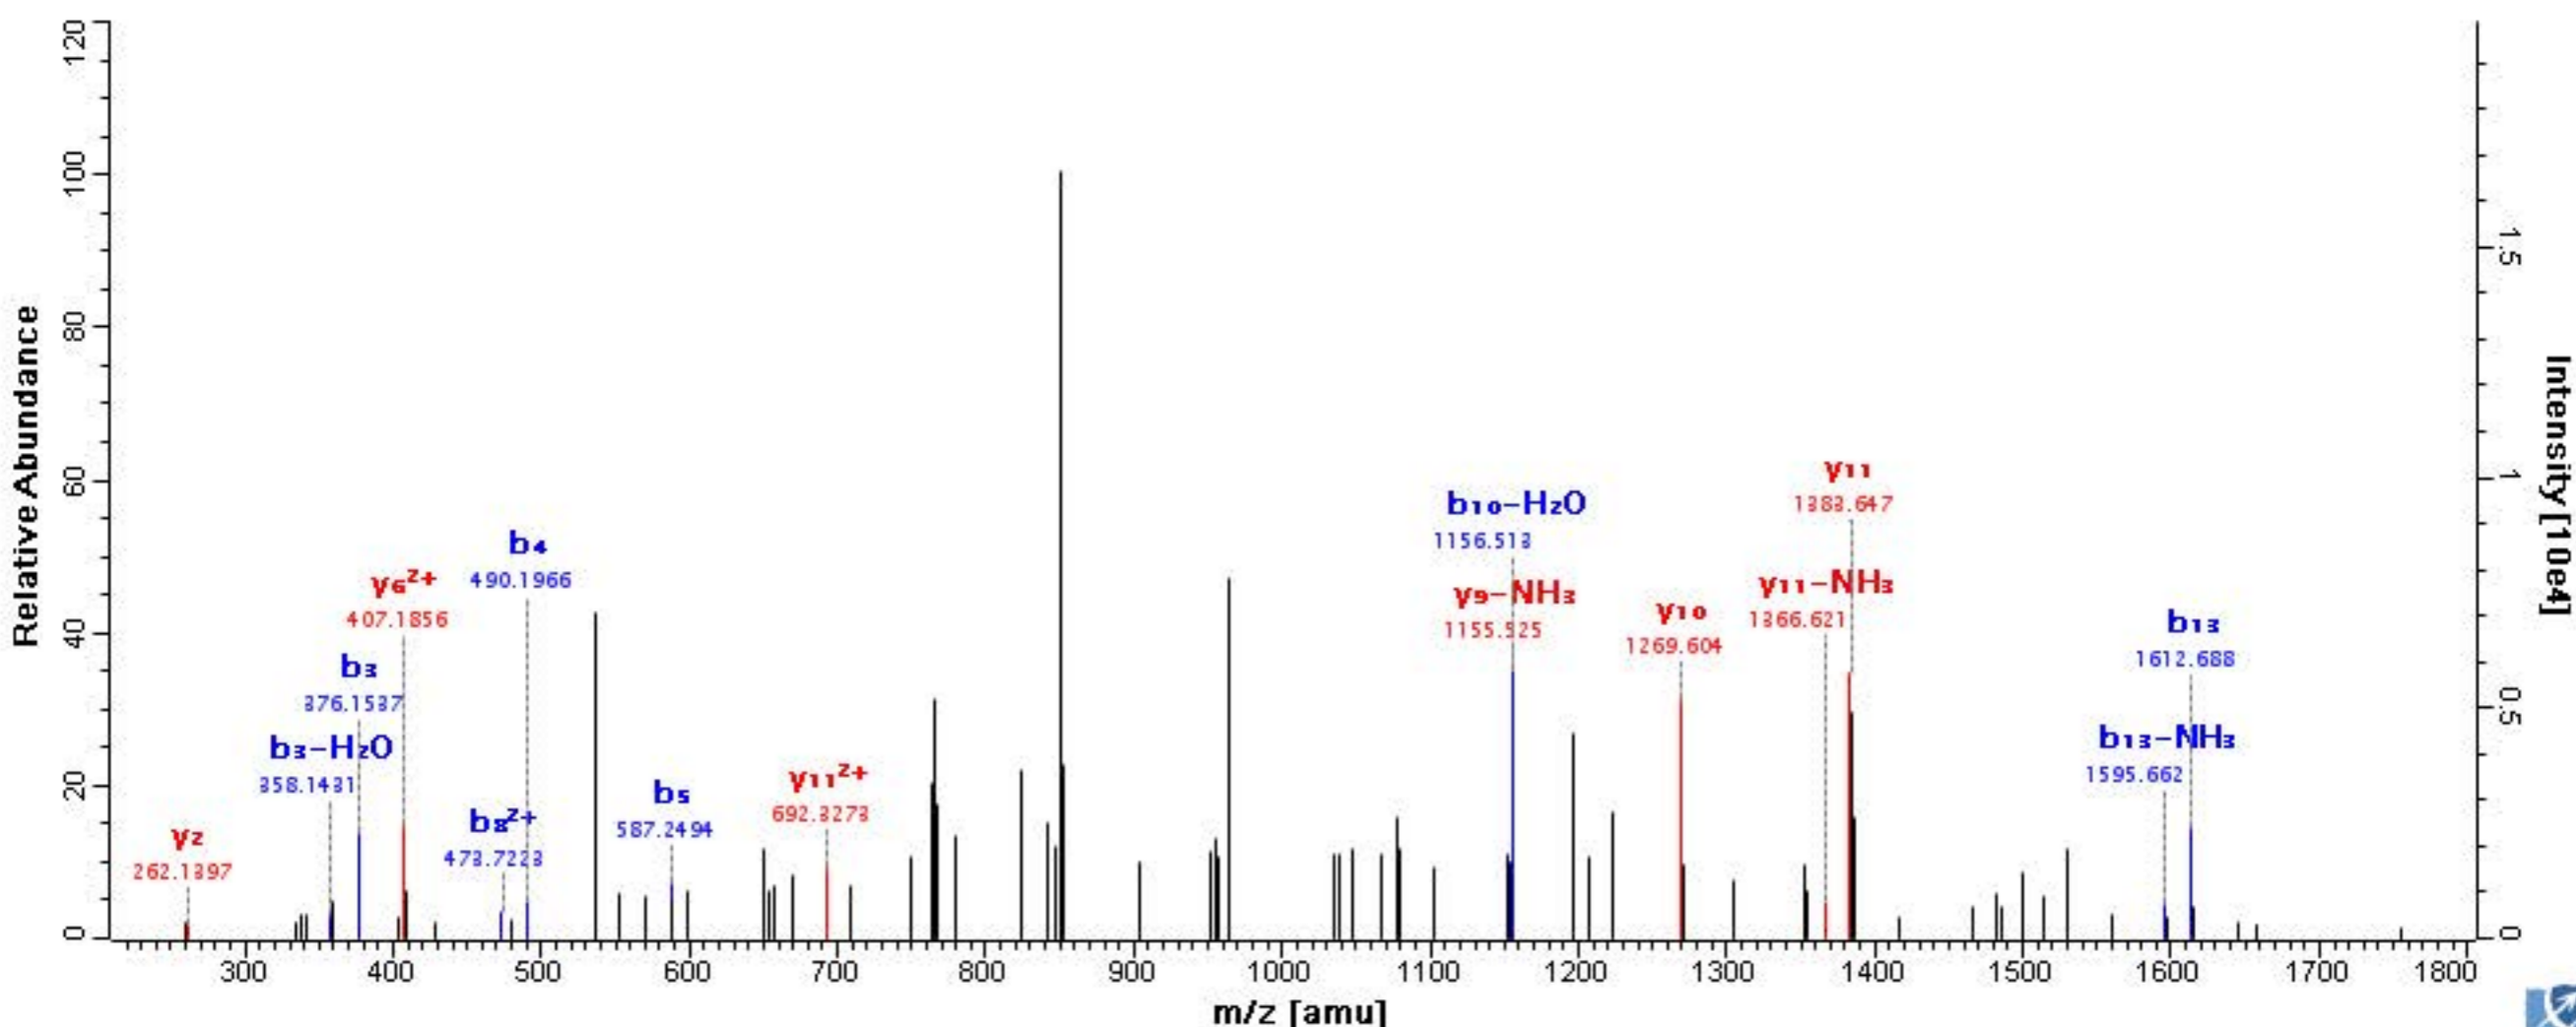

#### precursor information

|                   |                     |
|-------------------|---------------------|
| Mass:             | 1757.78786          |
| m/z:              | System.Collections. |
| Charge:           | System.Collections. |
| Retentiontime:    | System.Collections. |
| Score:            | 71.24082            |
| Mass Error [ppm]: | 0.75685             |
| PEP:              | 0.0012877           |
| Precursor Type:   | MULTI               |

#### general information

|                       |          |
|-----------------------|----------|
| Annotation:           | 8 of 14  |
| AminoAcids Coverage:  | 57 %     |
| Intensity Coverage:   | 19 %     |
| Protein Localisation: | 1 ... 14 |

| b <sup>2+</sup> ion |          | b ion     |          | seq |   |    | y ion    |           | y <sup>2+</sup> ion |           |
|---------------------|----------|-----------|----------|-----|---|----|----------|-----------|---------------------|-----------|
| Δ dalton            | mass     | Δ dalton  | mass     |     |   |    | Δ dalton | mass      | Δ dalton            | mass      |
|                     | 148.0427 |           | 148.0427 | 1   | M | 13 |          |           |                     |           |
|                     | 247.1111 |           | 247.1111 | 2   | V | 12 | 1611.758 |           | 1611.758            |           |
|                     | 376.1537 | -0.042294 | 376.1537 | 3   | E | 11 | 1512.69  |           | 1512.69             |           |
|                     | 490.1966 | +0.131088 | 490.1966 | 4   | N | 10 | 1383.647 | -0.067561 | 692.3273            | +0.152767 |
|                     | 587.2494 | +0.106827 | 587.2494 | 5   | P | 9  | 1269.604 | +0.084863 | 1269.604            |           |
|                     | 734.2848 |           | 734.2848 | 6   | M | 8  | 1172.552 |           | 1172.552            |           |
|                     | 833.3532 |           | 833.3532 | 7   | V | 7  | 1025.516 |           | 1025.516            |           |
| -0.412541           | 473.7223 |           | 946.4373 | 8   | I | 6  | 926.4479 |           | 926.4479            |           |
|                     | 1060.48  |           | 1060.48  | 9   | N | 5  | 813.3638 |           | 407.1856            | +0.026362 |
|                     | 1174.523 |           | 1174.523 | 10  | N | 4  | 699.3209 |           | 699.3209            |           |
|                     | 1360.602 |           | 1360.602 | 11  | W | 3  | 585.278  |           | 585.278             |           |
|                     | 1497.661 |           | 1497.661 | 12  | H | 2  | 399.1987 |           | 399.1987            |           |
|                     | 1612.688 | -0.020793 | 1612.688 | 13  | D | 1  | 262.1397 | +0.103966 | 262.1397            |           |
|                     |          |           |          | 14  | K | 0  | 147.1128 |           | 147.1128            |           |



Source: 20120602\_VR\_Bsu\_TripleSILAC\_WTPPrkCPrpC\_OG\_F05  
 Scannumber: 32342  
 Protein: BSU23830; yqjL  
 Peptide Score: 79.69  
 Method: ITMS; CID; 3

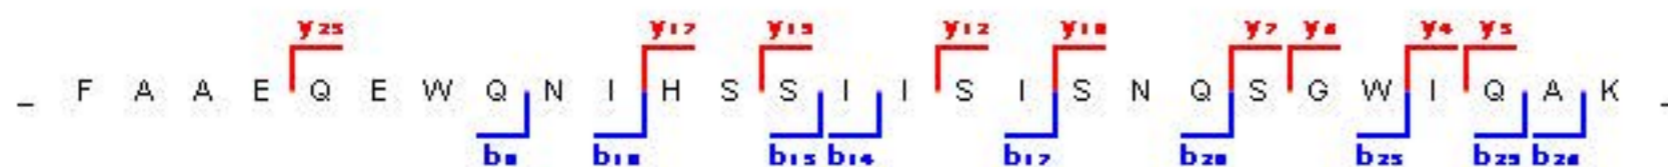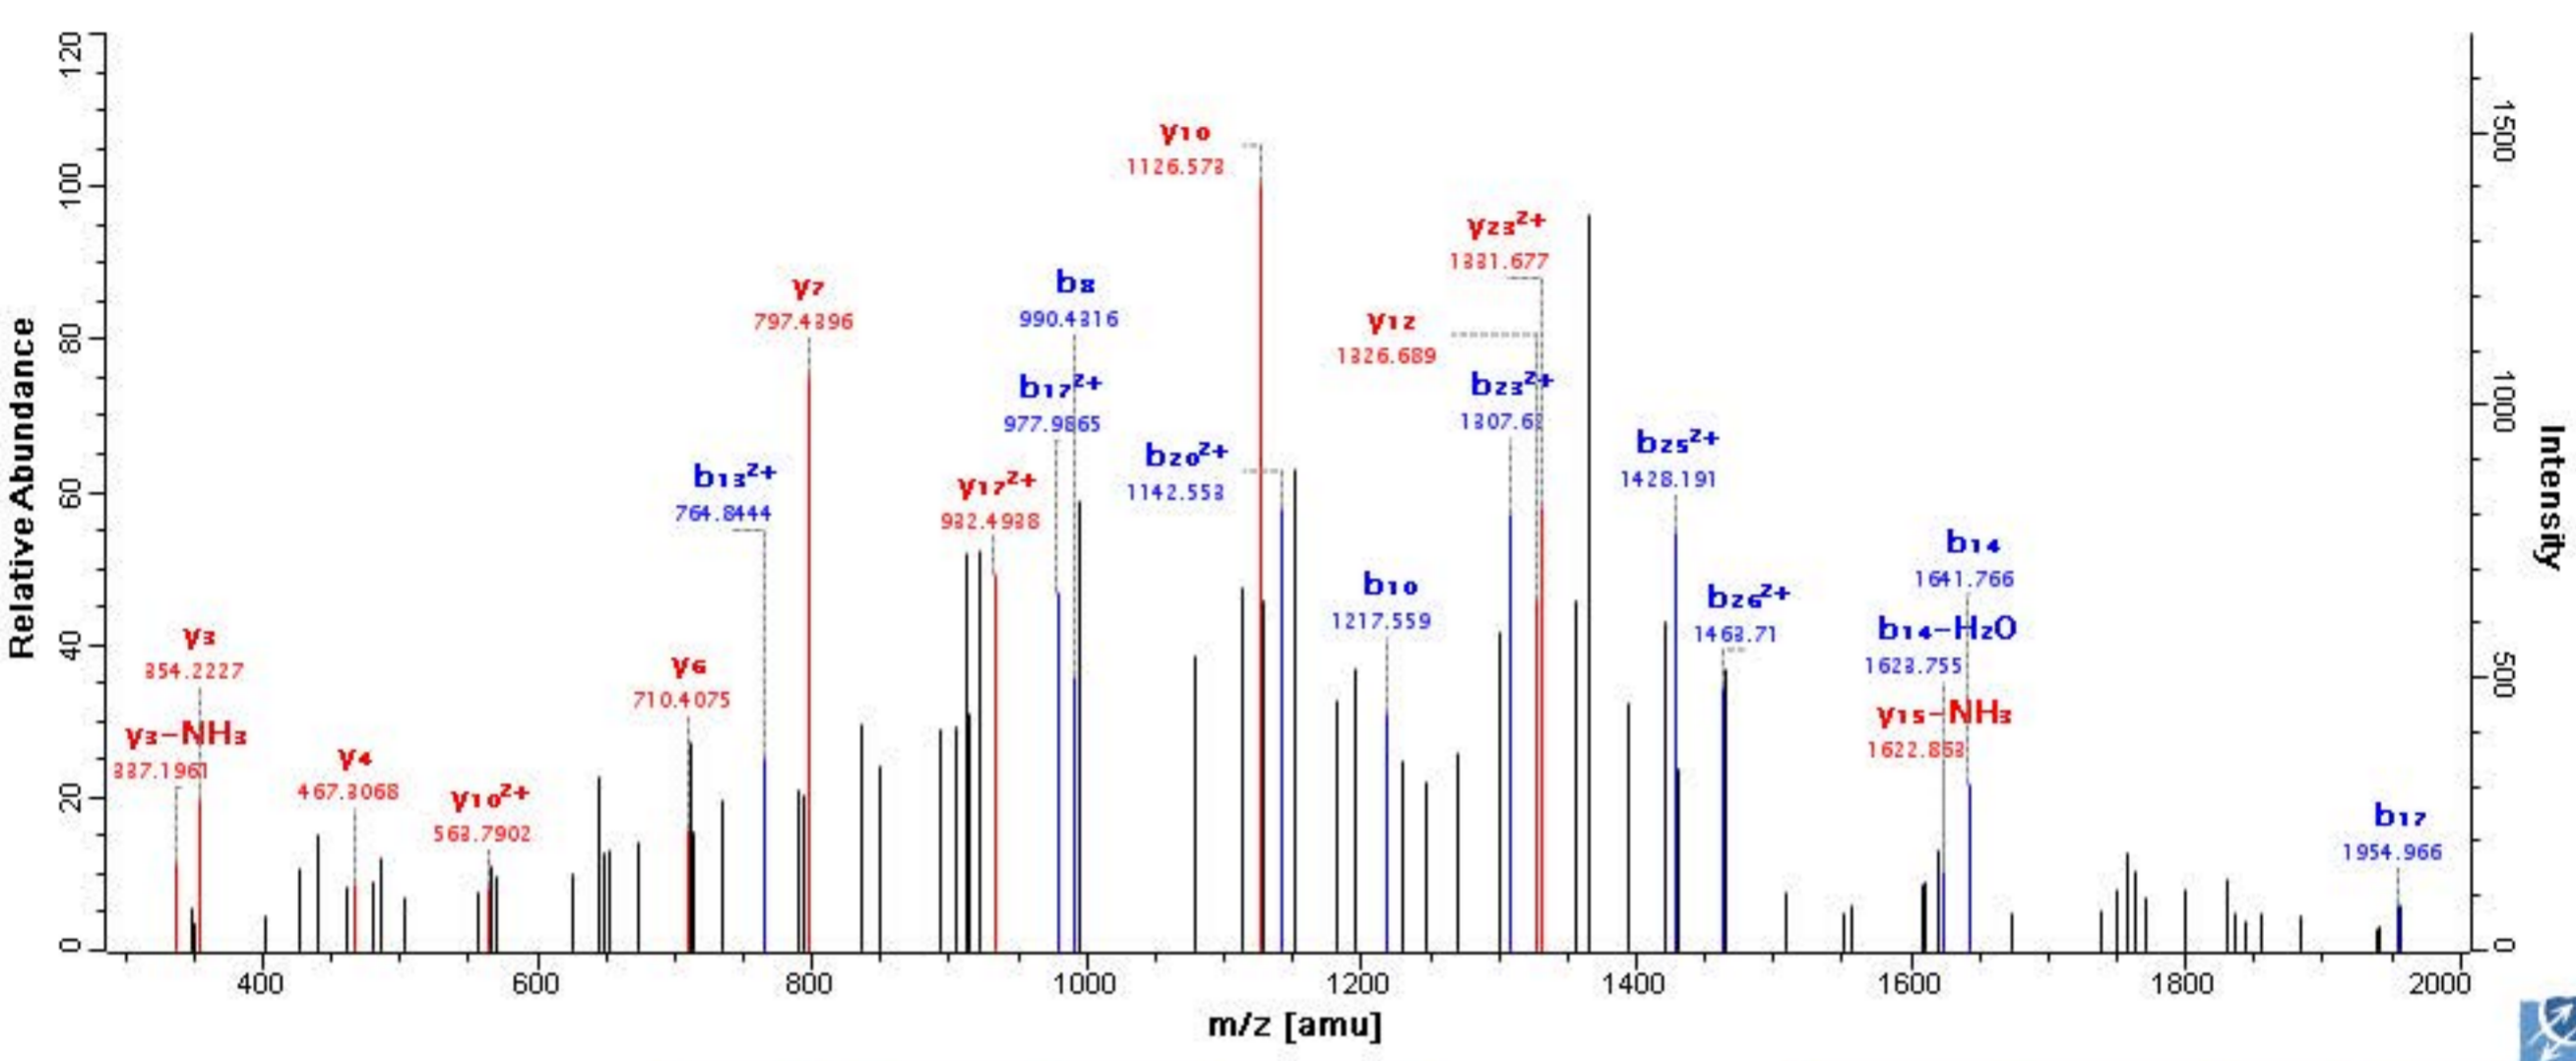

precursor information

|                   |                     |
|-------------------|---------------------|
| Mass:             | 3079.52613          |
| m/z:              | System.Collections. |
| Charge:           | System.Collections. |
| Retentiontime:    | System.Collections. |
| Score:            | 79.6897             |
| Mass Error [ppm]: | 0.59394             |
| PEP:              | 5.8448E-08          |
| Precursor Type:   | ISO                 |

| b <sup>2+</sup> ion |          | b ion     |          | seq |   |    | y ion    |           | y <sup>2+</sup> ion |           |
|---------------------|----------|-----------|----------|-----|---|----|----------|-----------|---------------------|-----------|
| Δ dalton            | mass     | Δ dalton  | mass     |     |   |    | Δ dalton | mass      | Δ dalton            | mass      |
|                     | 148.0757 |           | 148.0757 | 1   | F | 26 |          |           |                     |           |
|                     | 219.1128 |           | 219.1128 | 2   | A | 25 | 2933.463 |           | 2933.463            |           |
|                     | 290.1499 |           | 290.1499 | 3   | A | 24 | 2862.426 |           | 2862.426            |           |
|                     | 419.1925 |           | 419.1925 | 4   | E | 23 | 2791.389 |           | 2791.389            |           |
|                     | 547.2511 |           | 547.2511 | 5   | Q | 22 | 2662.346 |           | 1331.677            | +0.472363 |
|                     | 676.2937 |           | 676.2937 | 6   | E | 21 | 2534.288 |           | 2534.288            |           |
|                     | 862.373  |           | 862.373  | 7   | W | 20 | 2405.245 |           | 2405.245            |           |
|                     | 990.4316 | +0.229317 | 990.4316 | 8   | Q | 19 | 2219.166 |           | 2219.166            |           |
|                     | 1104.474 |           | 1104.474 | 9   | N | 18 | 2091.107 |           | 2091.107            |           |
|                     | 1217.559 | +0.199981 | 1217.559 | 10  | I | 17 | 1977.064 |           | 1977.064            |           |
|                     | 1354.617 |           | 1354.617 | 11  | H | 16 | 1863.98  |           | 932.4938            | +0.188958 |
|                     | 1441.65  |           | 1441.65  | 12  | S | 15 | 1726.921 |           | 1726.921            |           |
| +0.415483           | 764.8444 |           | 1528.682 | 13  | S | 14 | 1639.889 |           | 1639.889            |           |
|                     | 1641.766 | +0.343168 | 1641.766 | 14  | I | 13 | 1552.857 |           | 1552.857            |           |
|                     | 1754.85  |           | 1754.85  | 15  | I | 12 | 1439.773 |           | 1439.773            |           |
|                     | 1841.882 |           | 1841.882 | 16  | S | 11 | 1326.689 | +0.086812 | 1326.689            |           |
| +0.495419           | 977.9865 | +0.076606 | 1954.966 | 17  | I | 10 | 1239.657 |           | 1239.657            |           |
|                     | 2041.998 |           | 2041.998 | 18  | S | 9  | 1126.573 | +0.098778 | 563.7902            | +0.254735 |
|                     | 2156.041 |           | 2156.041 | 19  | N | 8  | 1039.541 |           | 1039.541            |           |
| +0.308779           | 1142.553 |           | 2284.099 | 20  | Q | 7  | 925.4981 |           | 925.4981            |           |
|                     | 2371.131 |           | 2371.131 | 21  | S | 6  | 797.4396 | +0.107922 | 797.4396            |           |
|                     | 2428.153 |           | 2428.153 | 22  | G | 5  | 710.4075 | +0.06384  | 710.4075            |           |
| +0.383246           | 1307.62  |           | 2614.232 | 23  | W | 4  | 653.3861 |           | 653.3861            |           |
|                     | 2727.316 |           | 2727.316 | 24  | I | 3  | 467.3068 | +0.105931 | 467.3068            |           |
| -0.010707           | 1428.191 |           | 2855.375 | 25  | Q | 2  | 354.2227 | -0.007179 | 354.2227            |           |
| +0.097323           | 1463.71  |           | 2926.412 | 26  | A | 1  | 226.1641 |           | 226.1641            |           |
|                     |          |           |          | 27  | K | 0  | 155.127  |           | 155.127             |           |

general information

|                       |             |
|-----------------------|-------------|
| Annotation:           | 16 of 27    |
| AminoAcids Coverag    | 59 %        |
| Intensity Coverage:   | 34 %        |
| Protein Localisation: | 190 ... 216 |

Source: 201 20602\_VR\_Bsu\_TripleSILAC\_WTPPrkCPrpC\_OG\_F06  
 Scannumber: 18078  
 Protein: BSU04080; kipl; ycsj  
 Peptide Score: 90.79  
 Method: ITMS; CID; 3

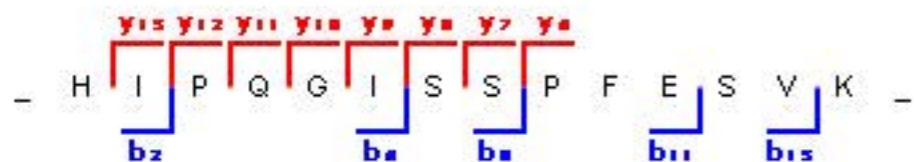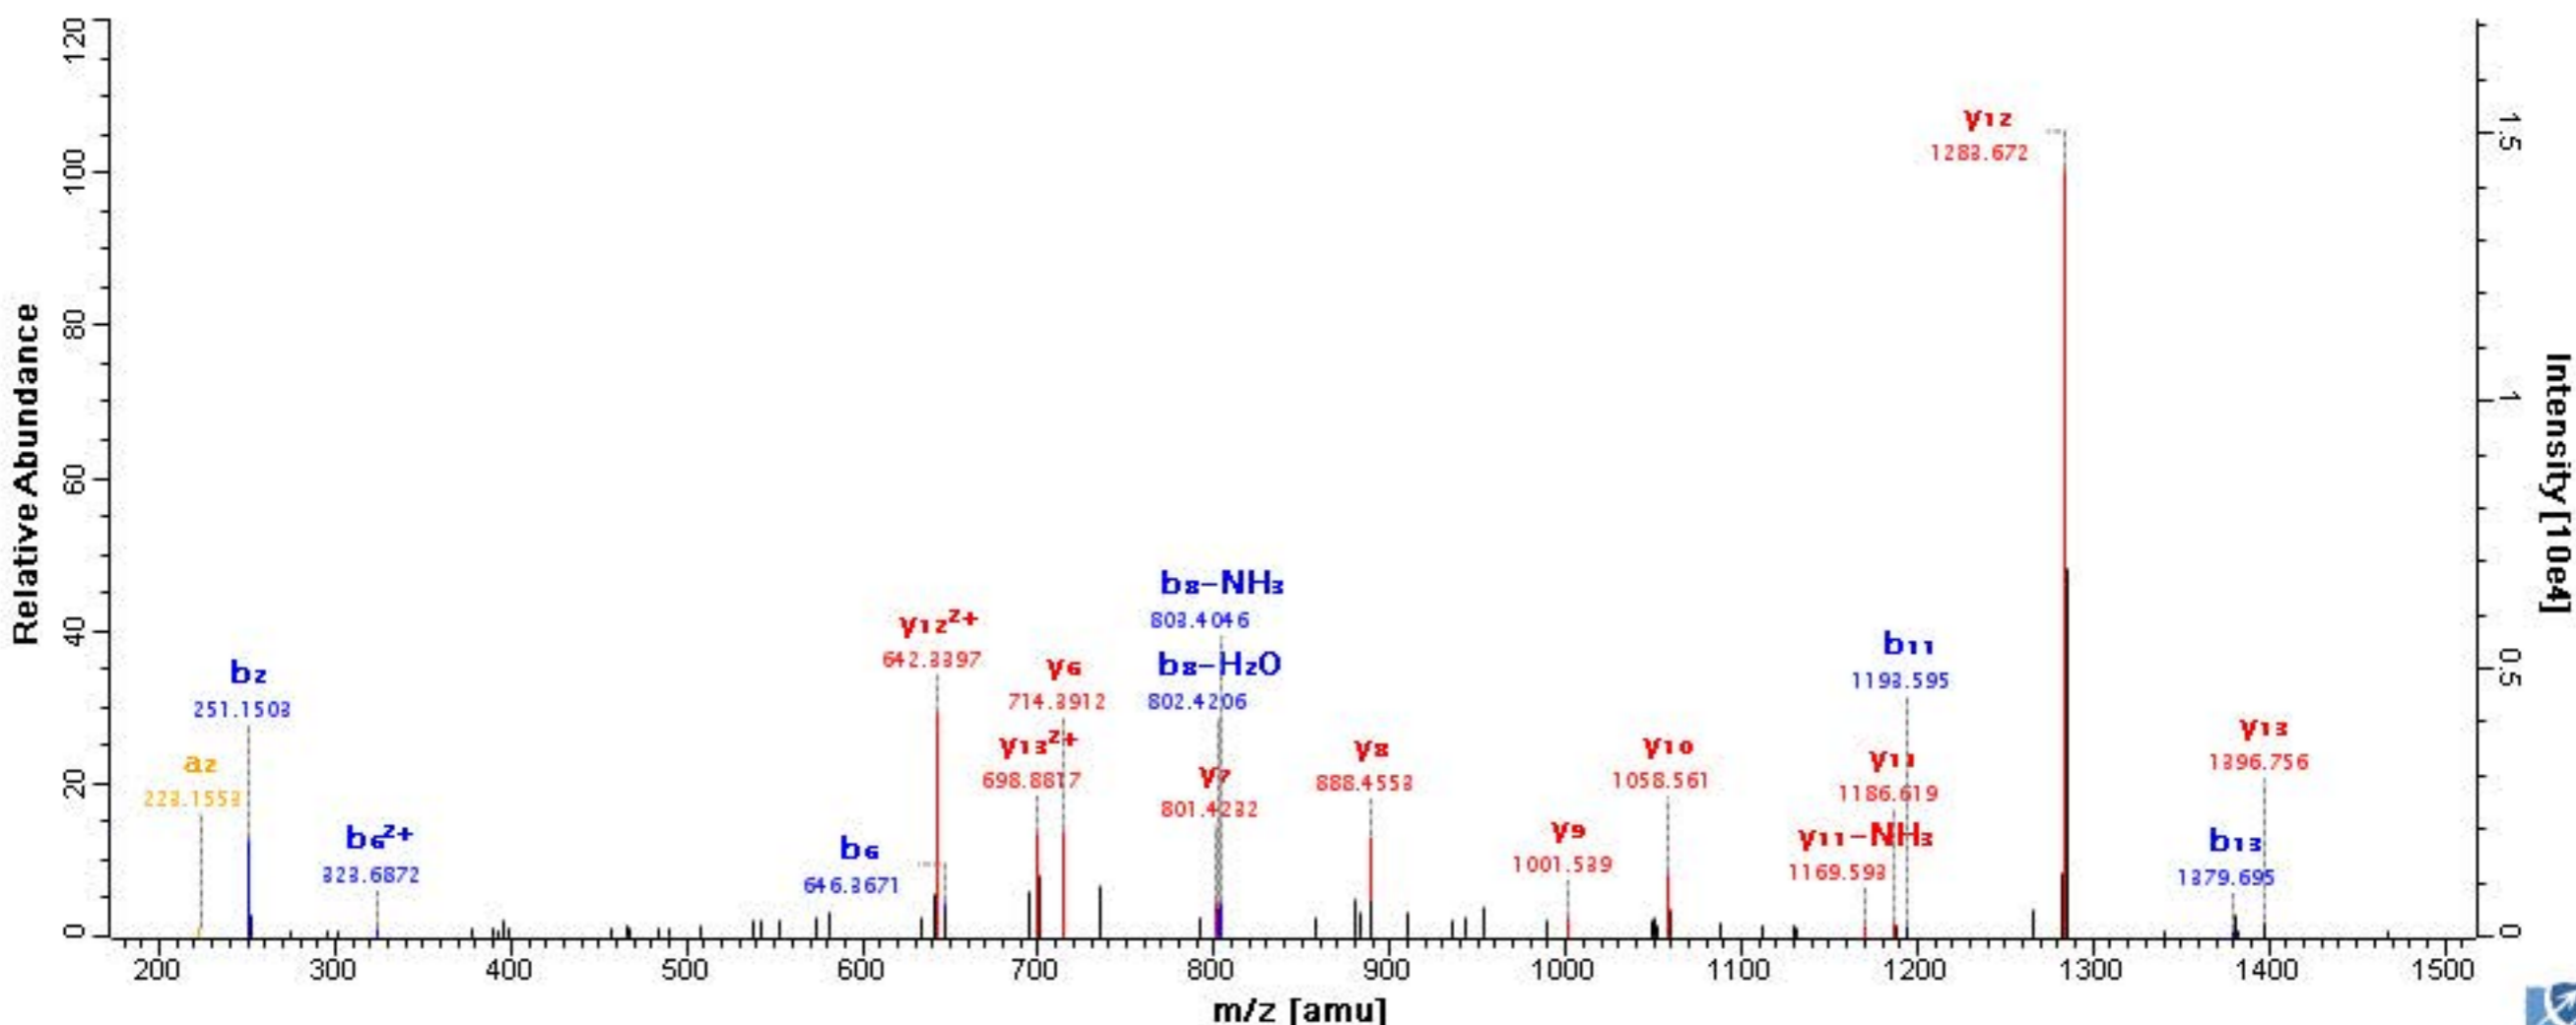

#### precursor information

|                   |                     |
|-------------------|---------------------|
| Mass:             | 1532.80681          |
| m/z:              | System.Collections. |
| Charge:           | System.Collections. |
| Retentiontime:    | System.Collections. |
| Score:            | 90.79278            |
| Mass Error [ppm]: | -0.67392            |
| PEP:              | 0.0034969           |
| Precursor Type:   | ISO                 |

#### general information

|                       |           |
|-----------------------|-----------|
| Annotation:           | 10 of 14  |
| AminoAcids Coverage:  | 71 %      |
| Intensity Coverage:   | 54%       |
| Protein Localisation: | 68 ... 81 |

| a ion    |         | b <sup>2+</sup> ion |         | b ion    |         |    |     |    | γ ion    |          | γ <sup>2+</sup> ion |         |
|----------|---------|---------------------|---------|----------|---------|----|-----|----|----------|----------|---------------------|---------|
| Δ dalton | mass    | Δ dalton            | mass    | Δ dalton | mass    |    | seq |    | Δ dalton | mass     | Δ dalton            | mass    |
|          | 110.071 |                     | 138.066 |          | 138.066 | 1  | H   | 13 |          |          |                     |         |
| -0.1665  | 223.155 |                     | 251.15  | -0.1453  | 251.15  | 2  | I   | 12 | 1396.76  | +0.01088 | 698.882             | -0.0381 |
|          | 320.208 |                     | 348.203 |          | 348.203 | 3  | P   | 11 | 1283.67  | +0.02378 | 642.34              | +0.0727 |
|          | 448.267 |                     | 476.262 |          | 476.262 | 4  | Q   | 10 | 1186.62  | +0.14771 | 1186.62             |         |
|          | 505.288 |                     | 533.283 |          | 533.283 | 5  | G   | 9  | 1058.56  | +0.02807 | 1058.56             |         |
|          | 618.372 | -0.0609             | 323.687 | -0.0651  | 646.367 | 6  | I   | 8  | 1001.54  | +0.1293  | 1001.54             |         |
|          | 705.404 |                     | 733.399 |          | 733.399 | 7  | S   | 7  | 888.455  | -0.0535  | 888.455             |         |
|          | 792.436 |                     | 820.431 |          | 820.431 | 8  | S   | 6  | 801.423  | -0.0257  | 801.423             |         |
|          | 889.489 |                     | 917.484 |          | 917.484 | 9  | P   | 5  | 714.391  | -0.3107  | 714.391             |         |
|          | 1036.56 |                     | 1064.55 |          | 1064.55 | 10 | F   | 4  | 617.338  |          | 617.338             |         |
|          | 1165.6  |                     | 1193.59 | +0.26809 | 1193.59 | 11 | E   | 3  | 470.27   |          | 470.27              |         |
|          | 1252.63 |                     | 1280.63 |          | 1280.63 | 12 | S   | 2  | 341.227  |          | 341.227             |         |
|          | 1351.7  |                     | 1379.7  | +0.23564 | 1379.7  | 13 | V   | 1  | 254.195  |          | 254.195             |         |
|          |         |                     |         |          |         | 14 | K   | 0  | 155.127  |          | 155.127             |         |

Source: 20120602\_VR\_Bsu\_TripleSILAC\_WTPPrkCPrpC\_OG\_F06  
 Scannumber: 21247  
 Protein: BSU08870; ygaN  
 Peptide Score: 103.88  
 Method: ITMS; CID; 3

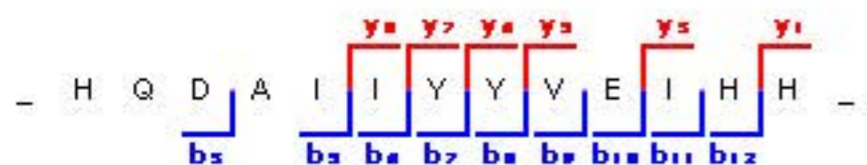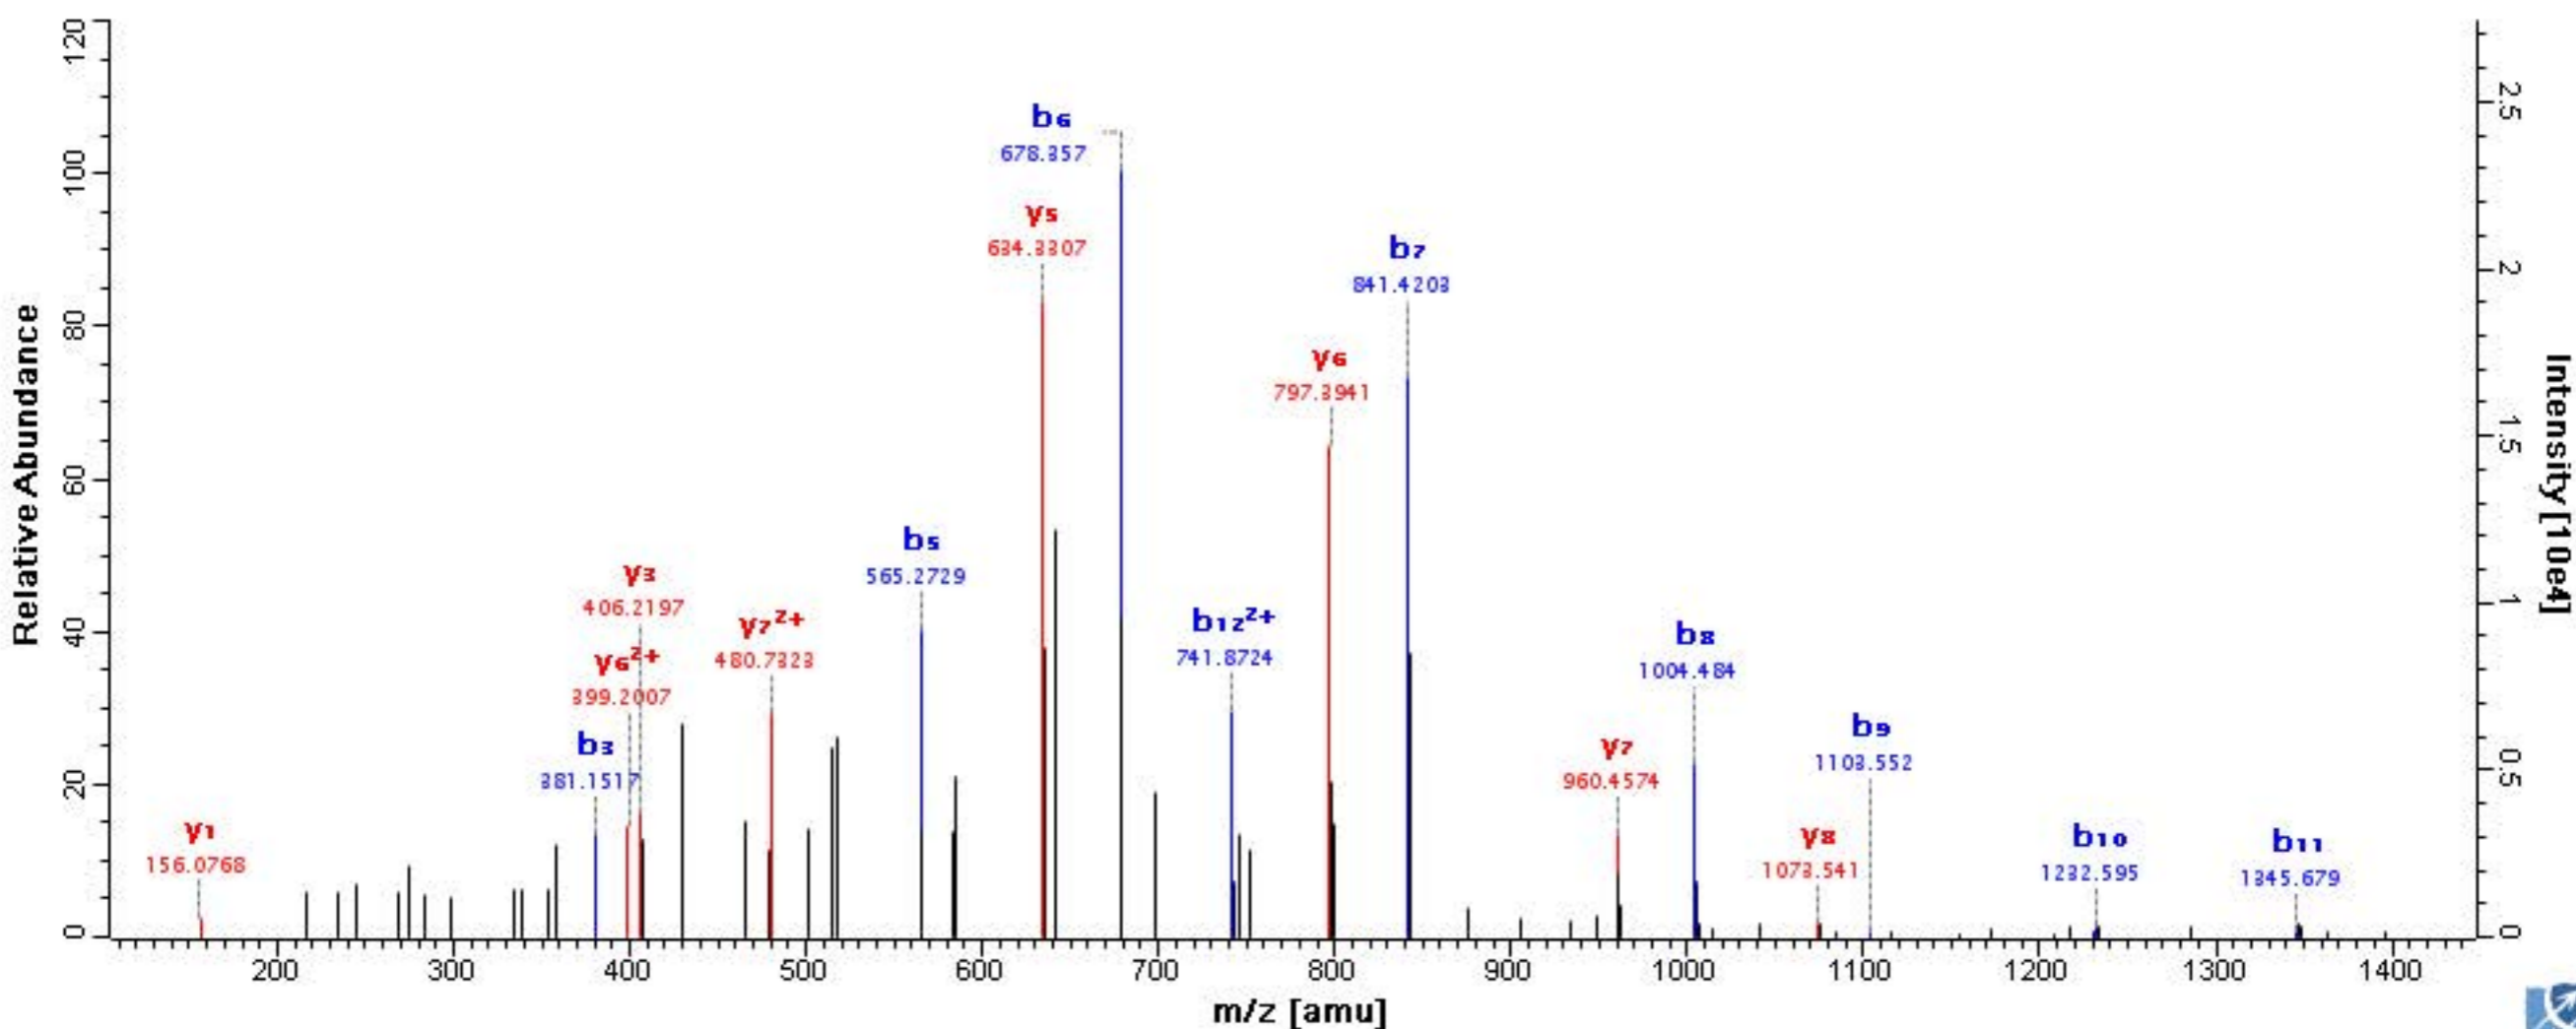

**precursor information**

|                   |                     |
|-------------------|---------------------|
| Mass:             | 1636.80069          |
| m/z:              | System.Collections. |
| Charge:           | System.Collections. |
| Retentiontime:    | System.Collections. |
| Score:            | 103.8804            |
| Mass Error [ppm]: | 0.54908             |
| PEP:              | 0.0024185           |
| Precursor Type:   | ISO                 |

**general information**

|                       |             |
|-----------------------|-------------|
| Annotation:           | 10 of 13    |
| AminoAcids Coverag    | 77 %        |
| Intensity Coverage:   | 45 %        |
| Protein Localisation: | 166 ... 178 |

| b <sup>2+</sup> ion |          | b ion     |          |    | seq |          | γ ion    |           | γ <sup>2+</sup> ion |           |
|---------------------|----------|-----------|----------|----|-----|----------|----------|-----------|---------------------|-----------|
| Δ dalton            | mass     | Δ dalton  | mass     |    |     | Δ dalton | mass     | Δ dalton  | mass                |           |
|                     | 138.0662 |           | 138.0662 | 1  | H   | 12       |          |           |                     |           |
|                     | 266.1248 |           | 266.1248 | 2  | Q   | 11       | 1500.748 |           | 1500.748            |           |
|                     | 381.1517 | -0.014136 | 381.1517 | 3  | D   | 10       | 1372.69  |           | 1372.69             |           |
|                     | 452.1888 |           | 452.1888 | 4  | A   | 9        | 1257.663 |           | 1257.663            |           |
|                     | 565.2729 | -0.026915 | 565.2729 | 5  | I   | 8        | 1186.626 |           | 1186.626            |           |
|                     | 678.357  | +0.00334  | 678.357  | 6  | I   | 7        | 1073.541 | +0.070359 | 1073.541            |           |
|                     | 841.4203 | -0.010794 | 841.4203 | 7  | Y   | 6        | 960.4574 | +0.209477 | 480.7323            | +0.103542 |
|                     | 1004.484 | +0.020176 | 1004.484 | 8  | Y   | 5        | 797.3941 | -0.047751 | 399.2007            | -0.029528 |
|                     | 1103.552 | +0.140361 | 1103.552 | 9  | V   | 4        | 634.3307 | -0.030382 | 634.3307            |           |
|                     | 1232.595 | +0.028798 | 1232.595 | 10 | E   | 3        | 535.2623 |           | 535.2623            |           |
|                     | 1345.679 | +0.144075 | 1345.679 | 11 | I   | 2        | 406.2197 | -0.054812 | 406.2197            |           |
| +0.059146           | 741.8724 |           | 1482.738 | 12 | H   | 1        | 293.1357 |           | 293.1357            |           |
|                     |          |           |          | 13 | H   | 0        | 156.0768 | +0.055785 | 156.0768            |           |

Source: 20120602\_VR\_Bsu\_TripleSILAC\_WTPPrkCPrpC\_OG\_F06  
 Scannumber: 28794  
 Protein: BSU14270; moeB  
 Peptide Score: 185.08  
 Method: ITMS; CID; 3

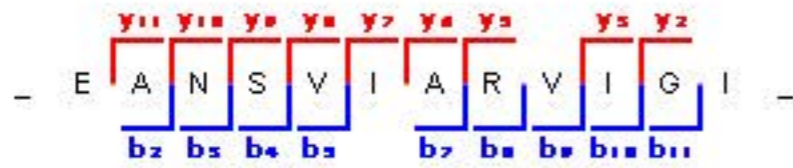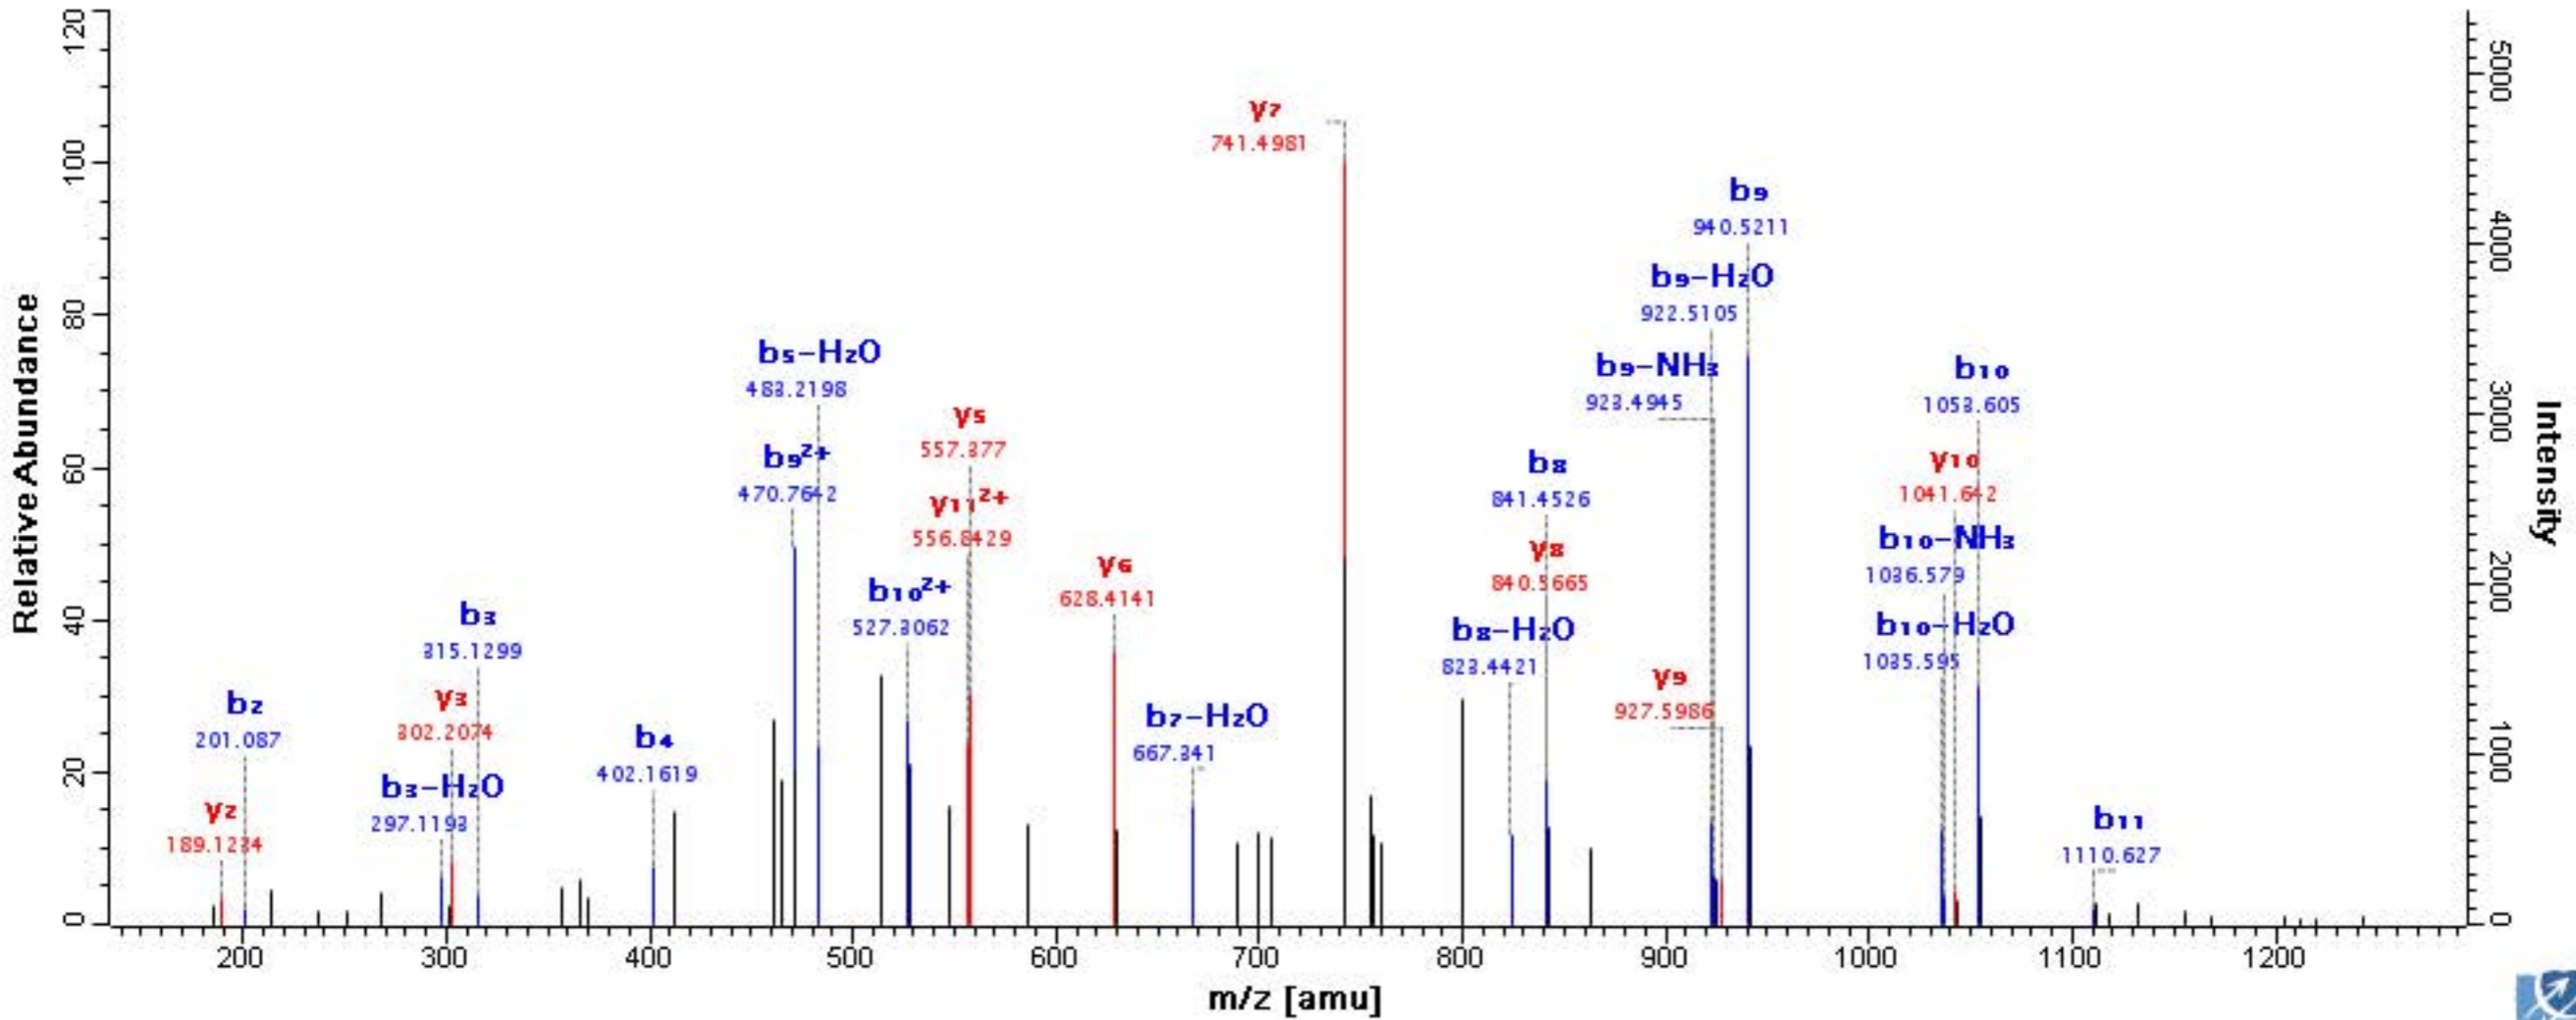

**precursor information**

|                   |                     |
|-------------------|---------------------|
| Mass:             | 1240.71419          |
| m/z:              | System.Collections. |
| Charge:           | System.Collections. |
| Retentiontime:    | System.Collections. |
| Score:            | 185.0814            |
| Mass Error [ppm]: | 0.20174             |
| PEP:              | 8.3122E-74          |
| Precursor Type:   | ISO                 |

**general information**

|                       |             |
|-----------------------|-------------|
| Annotation:           | 10 of 12    |
| AminoAcids Coverag    | 83 %        |
| Intensity Coverage:   | 55 %        |
| Protein Localisation: | 328 ... 339 |

| b <sup>2+</sup> ion |          | b ion     |          |    |     |    | γ ion    |           | γ <sup>2+</sup> ion |           |
|---------------------|----------|-----------|----------|----|-----|----|----------|-----------|---------------------|-----------|
| Δ dalton            | mass     | Δ dalton  | mass     |    | seq |    | Δ dalton | mass      | Δ dalton            | mass      |
|                     | 130.0499 |           | 130.0499 | 1  | E   | 11 |          |           |                     |           |
|                     | 201.087  | +0.007102 | 201.087  | 2  | A   | 10 | 1112.679 |           | 556.8429            | -0.451285 |
|                     | 315.1299 | +0.112643 | 315.1299 | 3  | N   | 9  | 1041.642 | +0.175755 | 1041.642            |           |
|                     | 402.1619 | +0.05443  | 402.1619 | 4  | S   | 8  | 927.5986 | +0.150079 | 927.5986            |           |
|                     | 501.2304 |           | 501.2304 | 5  | V   | 7  | 840.5665 | +0.15275  | 840.5665            |           |
|                     | 614.3144 |           | 614.3144 | 6  | I   | 6  | 741.4981 | +0.082187 | 741.4981            |           |
|                     | 685.3515 |           | 685.3515 | 7  | A   | 5  | 628.4141 | +0.14324  | 628.4141            |           |
|                     | 841.4526 | +0.138178 | 841.4526 | 8  | R   | 4  | 557.377  | +0.06689  | 557.377             |           |
| +0.052362           | 470.7642 | +0.119325 | 940.5211 | 9  | V   | 3  | 401.2758 |           | 401.2758            |           |
| +0.049881           | 527.3062 | +0.067121 | 1053.605 | 10 | I   | 2  | 302.2074 | -0.020299 | 302.2074            |           |
|                     | 1110.627 | +0.268558 | 1110.627 | 11 | G   | 1  | 189.1234 | -0.050905 | 189.1234            |           |
|                     |          |           |          | 12 | I   | 0  | 132.1019 |           | 132.1019            |           |

Source: 20120602\_VR\_Bsu\_TripleSILAC\_WTPPrkCPrpC\_OG\_F06  
 Scannumber: 29405  
 Protein: BSU13670; mhqR; ykwE  
 Peptide Score: 159.34  
 Method: ITMS; CID; 3

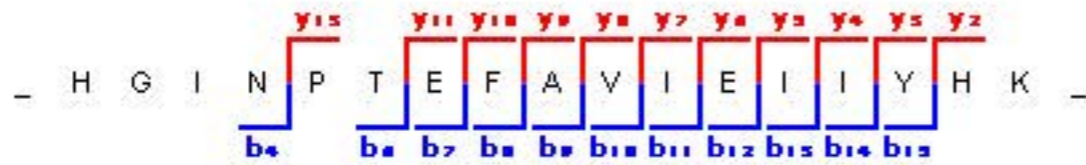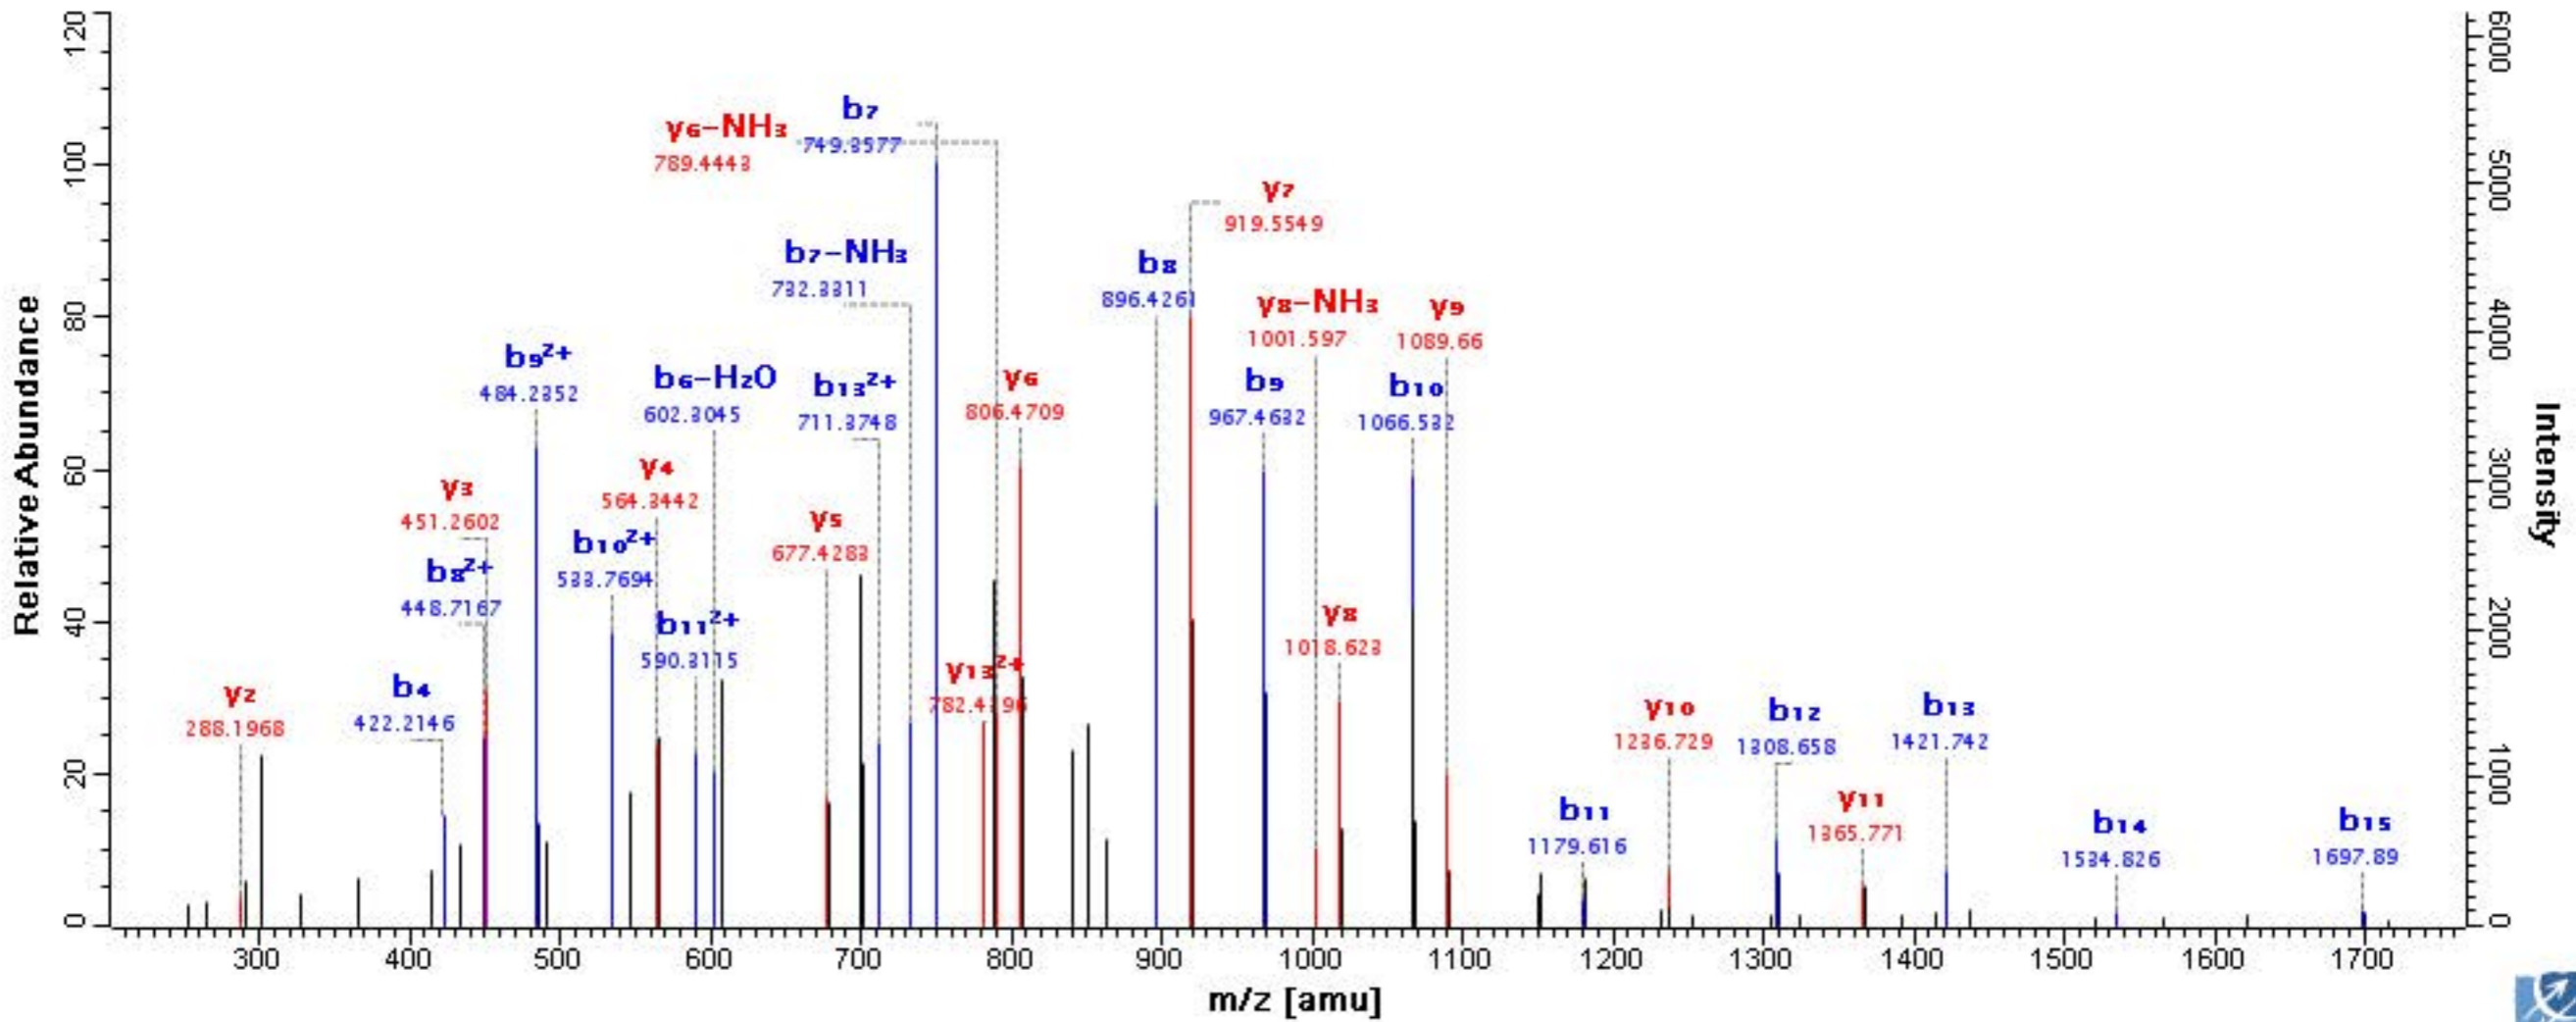

precursor information

|                   |                     |
|-------------------|---------------------|
| Mass:             | 1980.04964          |
| m/z:              | System.Collections. |
| Charge:           | System.Collections. |
| Retentiontime:    | System.Collections. |
| Score:            | 159.3446            |
| Mass Error [ppm]: | 1.382               |
| PEP:              | 3.8993E-48          |
| Precursor Type:   | MULTI               |

| b <sup>2+</sup> ion |          | b ion     |          | seq |   |    | y ion    |           | y <sup>2+</sup> ion |          |
|---------------------|----------|-----------|----------|-----|---|----|----------|-----------|---------------------|----------|
| Δ dalton            | mass     | Δ dalton  | mass     |     |   |    | Δ dalton | mass      | Δ dalton            | mass     |
|                     | 138.0662 |           | 138.0662 | 1   | H | 16 |          |           |                     |          |
|                     | 195.0877 |           | 195.0877 | 2   | G | 15 | 1848.02  |           | 1848.02             |          |
|                     | 308.1717 |           | 308.1717 | 3   | I | 14 | 1790.999 |           | 1790.999            |          |
|                     | 422.2146 | +0.039507 | 422.2146 | 4   | N | 13 | 1677.915 |           | 1677.915            |          |
|                     | 519.2674 |           | 519.2674 | 5   | P | 12 | 1563.872 |           | 782.4396            | -0.14095 |
|                     | 620.3151 |           | 620.3151 | 6   | T | 11 | 1466.819 |           | 1466.819            |          |
|                     | 749.3577 | -0.021741 | 749.3577 | 7   | E | 10 | 1365.771 | +0.005995 | 1365.771            |          |
| +0.125051           | 448.7167 | -0.1258   | 896.4261 | 8   | F | 9  | 1236.729 | +0.067875 | 1236.729            |          |
| +0.035571           | 484.2352 | +0.03362  | 967.4632 | 9   | A | 8  | 1089.66  | +0.025449 | 1089.66             |          |
| +0.357993           | 533.7694 | +0.001827 | 1066.532 | 10  | V | 7  | 1018.623 | +0.051759 | 1018.623            |          |
| +0.111493           | 590.3115 | +0.278114 | 1179.616 | 11  | I | 6  | 919.5549 | +0.084712 | 919.5549            |          |
|                     | 1308.658 | +0.080126 | 1308.658 | 12  | E | 5  | 806.4709 | -0.018053 | 806.4709            |          |
| +0.401436           | 711.3748 | +0.14279  | 1421.742 | 13  | I | 4  | 677.4283 | +0.039311 | 677.4283            |          |
|                     | 1534.826 | +0.442637 | 1534.826 | 14  | I | 3  | 564.3442 | -0.085121 | 564.3442            |          |
|                     | 1697.89  | +0.147864 | 1697.89  | 15  | Y | 2  | 451.2602 | -0.045247 | 451.2602            |          |
|                     | 1834.949 |           | 1834.949 | 16  | H | 1  | 288.1968 | +0.027878 | 288.1968            |          |
|                     |          |           |          | 17  | K | 0  | 151.1379 |           | 151.1379            |          |

general information

|                       |           |
|-----------------------|-----------|
| Annotation:           | 14 of 17  |
| AminoAcids Coverag    | 82 %      |
| Intensity Coverage:   | 59 %      |
| Protein Localisation: | 30 ... 46 |

Source: 20120602\_VR\_Bsu\_TripleSILAC\_WTPkCPrpC\_OG\_F06  
 Scannumber: 30799  
 Protein: BSU40140; yydj  
 Peptide Score: 196.24  
 Method: ITMS; CID; 3

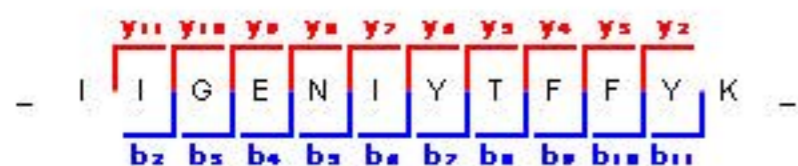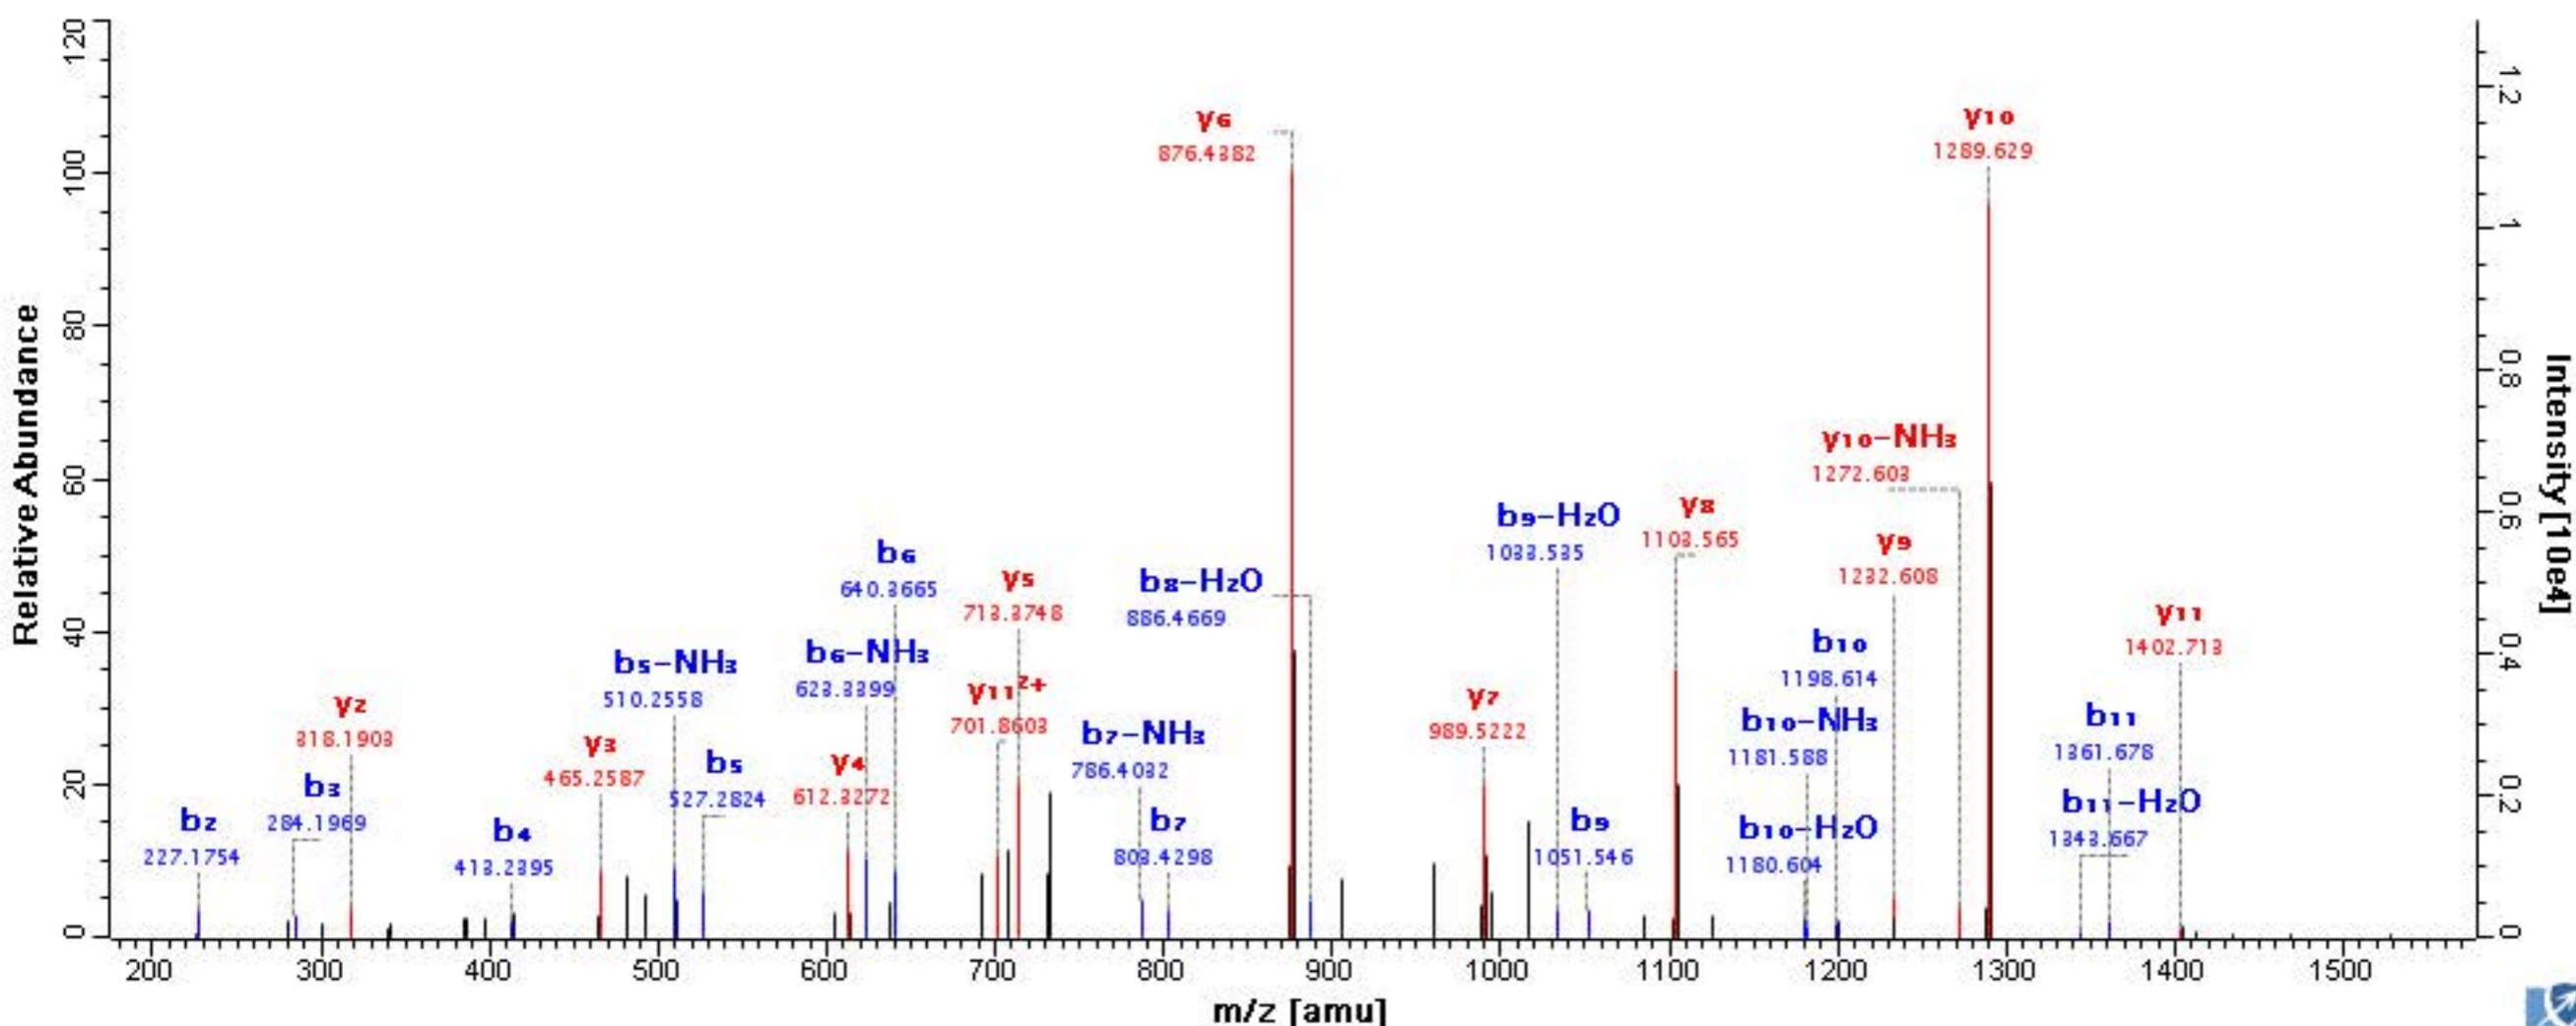

#### precursor information

|                   |                     |
|-------------------|---------------------|
| Mass:             | 1514.79071          |
| m/z:              | System.Collections. |
| Charge:           | System.Collections. |
| Retentiontime:    | System.Collections. |
| Score:            | 196.239             |
| Mass Error [ppm]: | 0.42302             |
| PEP:              | 4.8069E-90          |
| Precursor Type:   | ISO                 |

#### general information

|                       |           |
|-----------------------|-----------|
| Annotation:           | 10 of 12  |
| AminoAcids Coverag    | 83 %      |
| Intensity Coverage:   | 55 %      |
| Protein Localisation: | 84 ... 95 |

| b ion      |              |    |     |    | gamma ion    |            | gamma <sup>2+</sup> ion |            |
|------------|--------------|----|-----|----|--------------|------------|-------------------------|------------|
| Δ dalton   | mass         |    | seq |    | Δ dalton     | mass       | Δ dalton                | mass       |
|            | 114.09134045 | 1  | I   | 11 |              |            |                         |            |
| -0.2707719 | 227.17540443 | 2  | I   | 10 | 1402.7132786 | +0.1568386 | 701.86027753            | -0.0256828 |
| +0.1197212 | 284.19686815 | 3  | G   | 9  | 1289.6292146 | +0.0573088 | 1289.6292146            |            |
| -0.0034383 | 413.23946125 | 4  | E   | 8  | 1232.6077509 | +0.0586309 | 1232.6077509            |            |
| +0.0257168 | 527.28238869 | 5  | N   | 7  | 1103.5651578 | +0.0134555 | 1103.5651578            |            |
| -0.0099463 | 640.36645267 | 6  | I   | 6  | 989.52223035 | +0.0271471 | 989.52223035            |            |
| -0.0834067 | 803.42978121 | 7  | Y   | 5  | 876.43816637 | +0.0084889 | 876.43816637            |            |
|            | 904.47745969 | 8  | T   | 4  | 713.37483783 | +0.0821934 | 713.37483783            |            |
| +0.1814213 | 1051.5458736 | 9  | F   | 3  | 612.32715935 | +0.0222669 | 612.32715935            |            |
| +0.301484  | 1198.6142875 | 10 | F   | 2  | 465.25874544 | -0.0536673 | 465.25874544            |            |
| +0.0191613 | 1361.6776161 | 11 | Y   | 1  | 318.19033152 | +0.1568059 | 318.19033152            |            |
|            |              | 12 | K   | 0  | 155.12700298 |            | 155.12700298            |            |

Source: 20120602\_VR\_Bsu\_TripleSILAC\_WTPPrkCPrpC\_OG\_F07  
 Scannumber: 24443  
 Protein: bfcB; BSU22550; qcrB  
 Peptide Score: 194.77  
 Method: ITMS; CID; 3

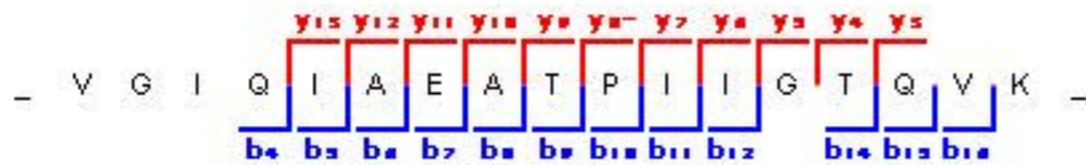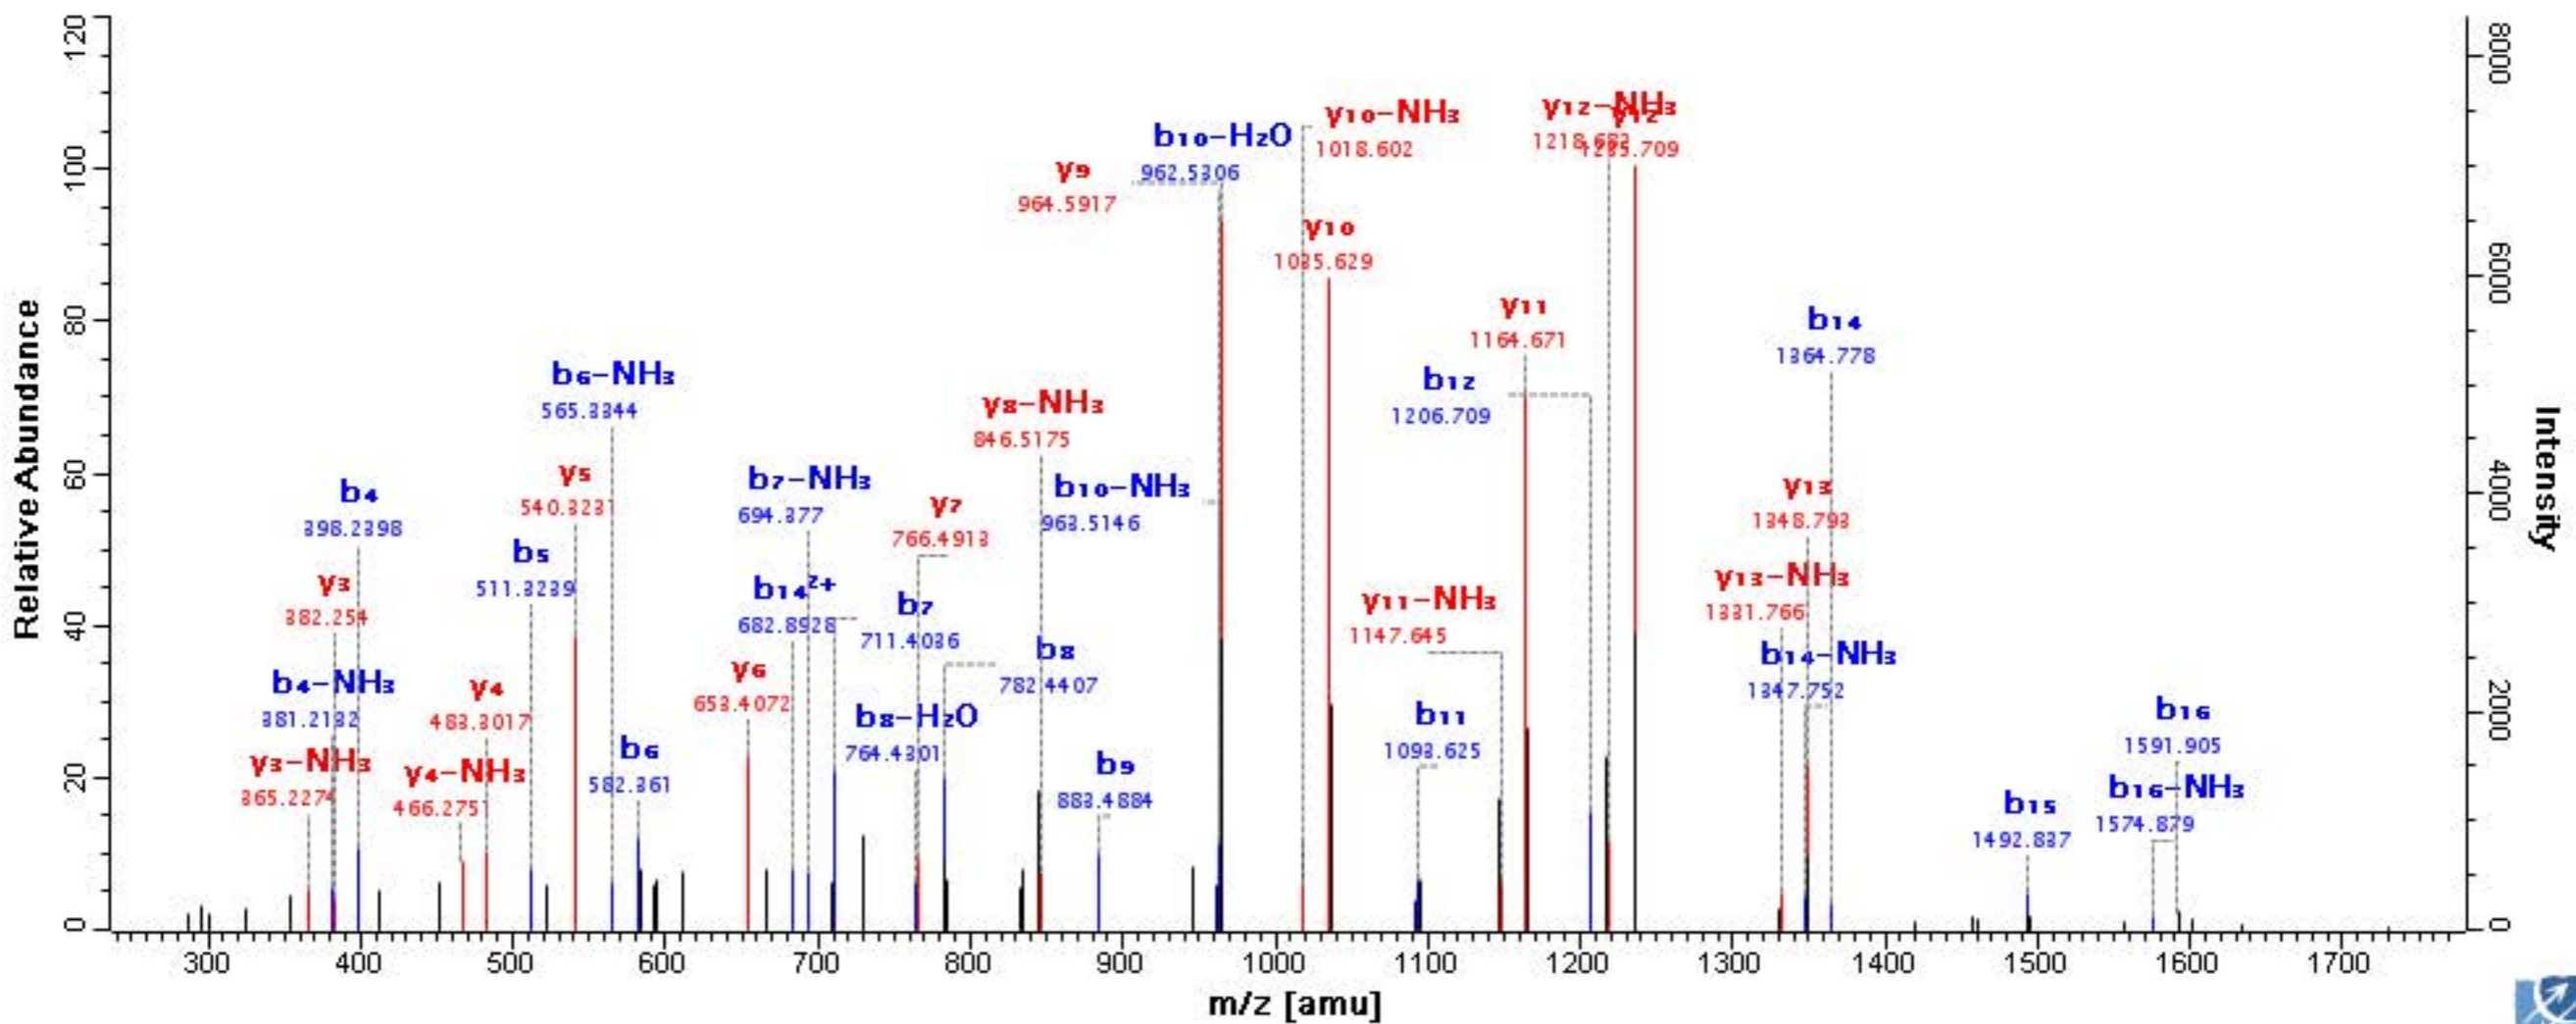

precursor information

|                   |                     |
|-------------------|---------------------|
| Mass:             | 1737.00359          |
| m/z:              | System.Collections. |
| Charge:           | System.Collections. |
| Retentiontime:    | System.Collections. |
| Score:            | 194.773             |
| Mass Error [ppm]: | -0.028233           |
| PEP:              | 2.9127E-89          |
| Precursor Type:   | MULTI               |

| b <sup>2+</sup> ion |              | b ion      |              |    |     |    | γ ion        |            |
|---------------------|--------------|------------|--------------|----|-----|----|--------------|------------|
| Δ dalton            | mass         | Δ dalton   | mass         |    | seq |    | Δ dalton     | mass       |
|                     | 100.07569038 |            | 100.07569038 | 1  | V   | 16 |              |            |
|                     | 157.09715411 |            | 157.09715411 | 2  | G   | 15 | 1646.9566968 |            |
|                     | 270.18121809 |            | 270.18121809 | 3  | I   | 14 | 1589.935233  |            |
|                     | 398.2397956  | -0.098194  | 398.2397956  | 4  | Q   | 13 | 1476.8511691 |            |
|                     | 511.32385958 | -0.0717233 | 511.32385958 | 5  | I   | 12 | 1348.7925915 | -0.0013318 |
|                     | 582.36097337 | -0.0816155 | 582.36097337 | 6  | A   | 11 | 1235.7085276 | +0.0061941 |
|                     | 711.40356646 | -0.0125142 | 711.40356646 | 7  | E   | 10 | 1164.6714138 | +0.0005833 |
|                     | 782.44068025 | -0.0274722 | 782.44068025 | 8  | A   | 9  | 1035.6288207 | +0.0041139 |
|                     | 883.48835872 | +0.051009  | 883.48835872 | 9  | T   | 8  | 964.5917069  | -0.0151078 |
|                     | 980.54112258 |            | 980.54112258 | 10 | P   | 7  | 863.54402842 |            |
|                     | 1093.6251866 | -0.0592686 | 1093.6251866 | 11 | I   | 6  | 766.49126457 | -0.1429369 |
|                     | 1206.7092505 | +0.0135278 | 1206.7092505 | 12 | I   | 5  | 653.40720059 | -0.0322616 |
|                     | 1263.7307143 |            | 1263.7307143 | 13 | G   | 4  | 540.32313661 | -0.1046918 |
| +0.4871092          | 682.8928346  | +0.0642586 | 1364.7783927 | 14 | T   | 3  | 483.30167289 | -0.0749883 |
|                     | 1492.8369702 | +0.1470385 | 1492.8369702 | 15 | Q   | 2  | 382.25399441 | +0.0868259 |
|                     | 1591.9053842 | +0.101818  | 1591.9053842 | 16 | V   | 1  | 254.1954169  |            |
|                     |              |            |              | 17 | K   | 0  | 155.12700298 |            |

general information

|                       |             |
|-----------------------|-------------|
| Annotation:           | 13 of 17    |
| AminoAcids Coverag    | 76 %        |
| Intensity Coverage:   | 64 %        |
| Protein Localisation: | 158 ... 174 |

Source: 20120602\_VR\_Bsu\_TripleSILAC\_WTPPrkCPrpC\_OG\_F07  
 Scannumber: 24907  
 Protein: BSU32060; yuiD  
 Peptide Score: 118.87  
 Method: ITMS; CID; 3

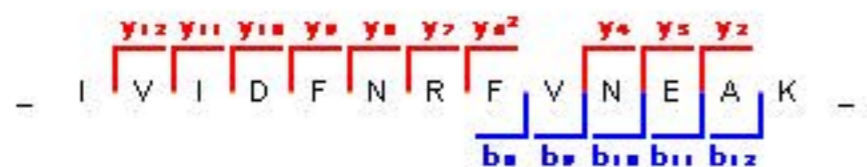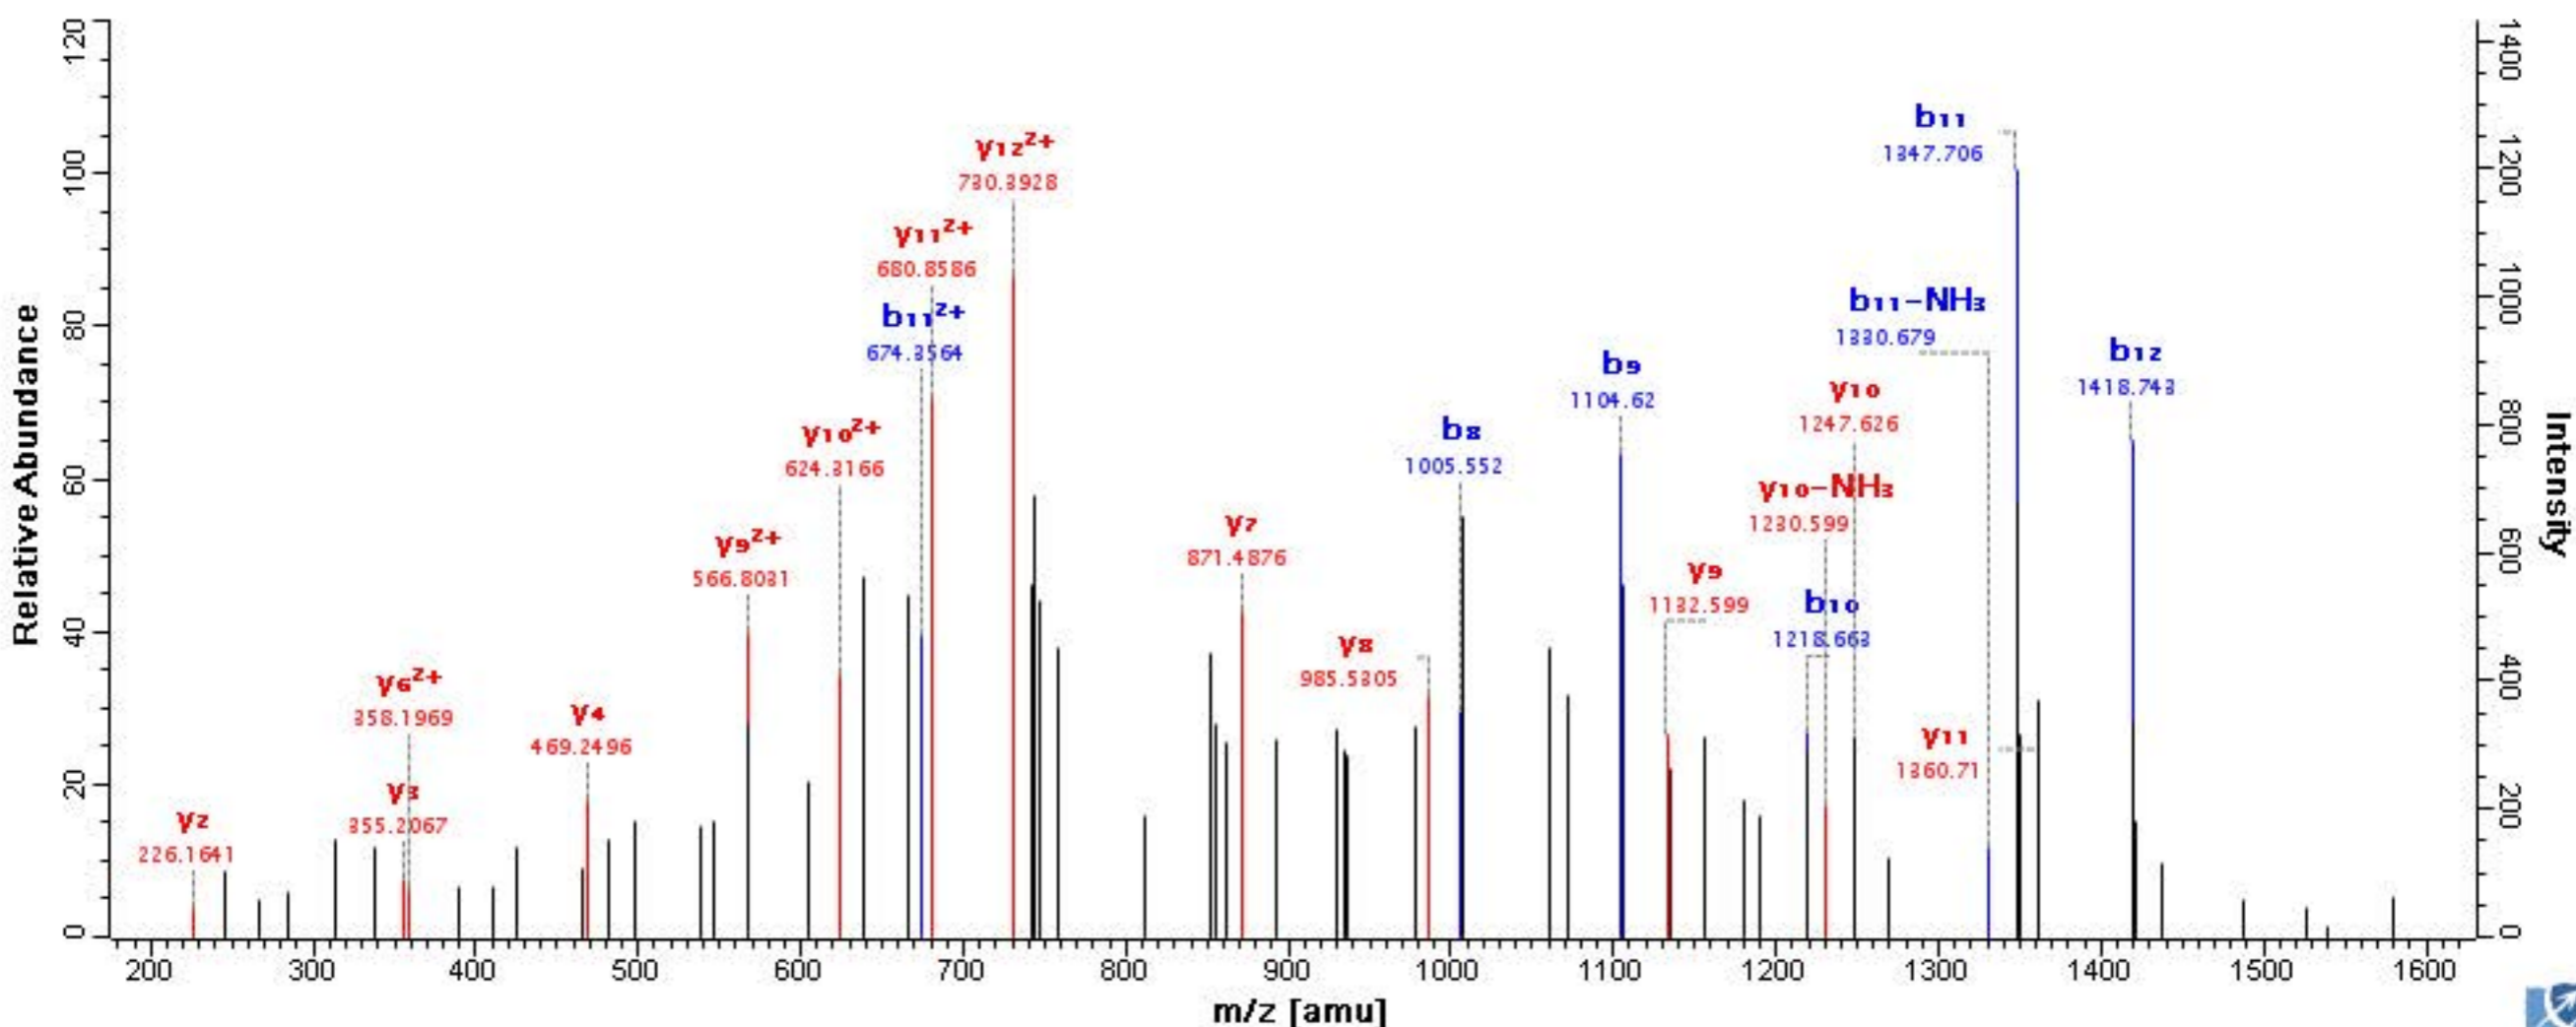

**precursor information**

|                   |                     |
|-------------------|---------------------|
| Mass:             | 1571.8548           |
| m/z:              | System.Collections. |
| Charge:           | System.Collections. |
| Retentiontime:    | System.Collections. |
| Score:            | 118.8658            |
| Mass Error [ppm]: | -0.20998            |
| PEP:              | 6.5467E-09          |
| Precursor Type:   | ISO                 |

**general information**

|                       |             |
|-----------------------|-------------|
| Annotation:           | 11 of 13    |
| AminoAcids Coverag    | 85 %        |
| Intensity Coverage:   | 38 %        |
| Protein Localisation: | 102 ... 114 |

| b <sup>2+</sup> ion |          | b ion     |          |     | γ ion |          | γ <sup>2+</sup> ion |           |           |           |
|---------------------|----------|-----------|----------|-----|-------|----------|---------------------|-----------|-----------|-----------|
| Δ dalton            | mass     | Δ dalton  | mass     | seq |       | Δ dalton | mass                | Δ dalton  | mass      |           |
|                     | 114.0913 |           | 114.0913 | 1   | I     | 12       |                     |           |           |           |
|                     | 213.1598 |           | 213.1598 | 2   | V     | 11       | 1459.778            | 730.3928  | +0.379409 |           |
|                     | 326.2438 |           | 326.2438 | 3   | I     | 10       | 1360.71             | +0.178625 | 680.8586  | -0.076069 |
|                     | 441.2708 |           | 441.2708 | 4   | D     | 9        | 1247.626            | +0.100824 | 624.3166  | +0.250448 |
|                     | 588.3392 |           | 588.3392 | 5   | F     | 8        | 1132.599            | +0.192098 | 566.8031  | +0.025211 |
|                     | 702.3821 |           | 702.3821 | 6   | N     | 7        | 985.5305            | +0.223891 | 985.5305  |           |
|                     | 858.4832 |           | 858.4832 | 7   | R     | 6        | 871.4876            | +0.275607 | 871.4876  |           |
|                     | 1005.552 | +0.065987 | 1005.552 | 8   | F     | 5        | 715.3865            |           | 358.1969  | +0.104277 |
|                     | 1104.62  | +0.167922 | 1104.62  | 9   | V     | 4        | 568.3181            |           | 568.3181  |           |
|                     | 1218.663 | +0.130244 | 1218.663 | 10  | N     | 3        | 469.2496            | +0.140072 | 469.2496  |           |
| +0.428127           | 674.3564 | +0.097905 | 1347.706 | 11  | E     | 2        | 355.2067            | -0.031905 | 355.2067  |           |
|                     | 1418.743 | +0.158569 | 1418.743 | 12  | A     | 1        | 226.1641            | -0.037972 | 226.1641  |           |
|                     |          |           |          | 13  | K     | 0        | 155.127             |           | 155.127   |           |



Source: 20120602\_VR\_Bsu\_TripleSILAC\_WTPPrkCPrpC\_OG\_F07  
 Scannumber: 27173  
 Protein: BSU05440; nap  
 Peptide Score: 54.28  
 Method: ITMS; CID; 3

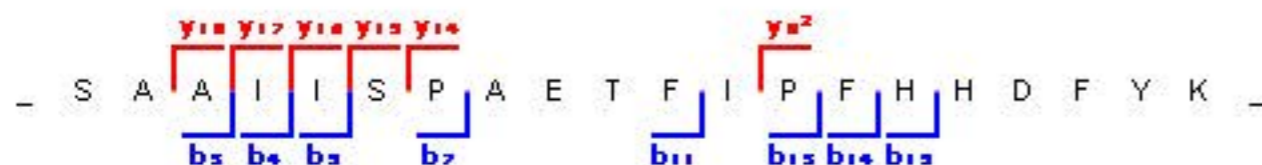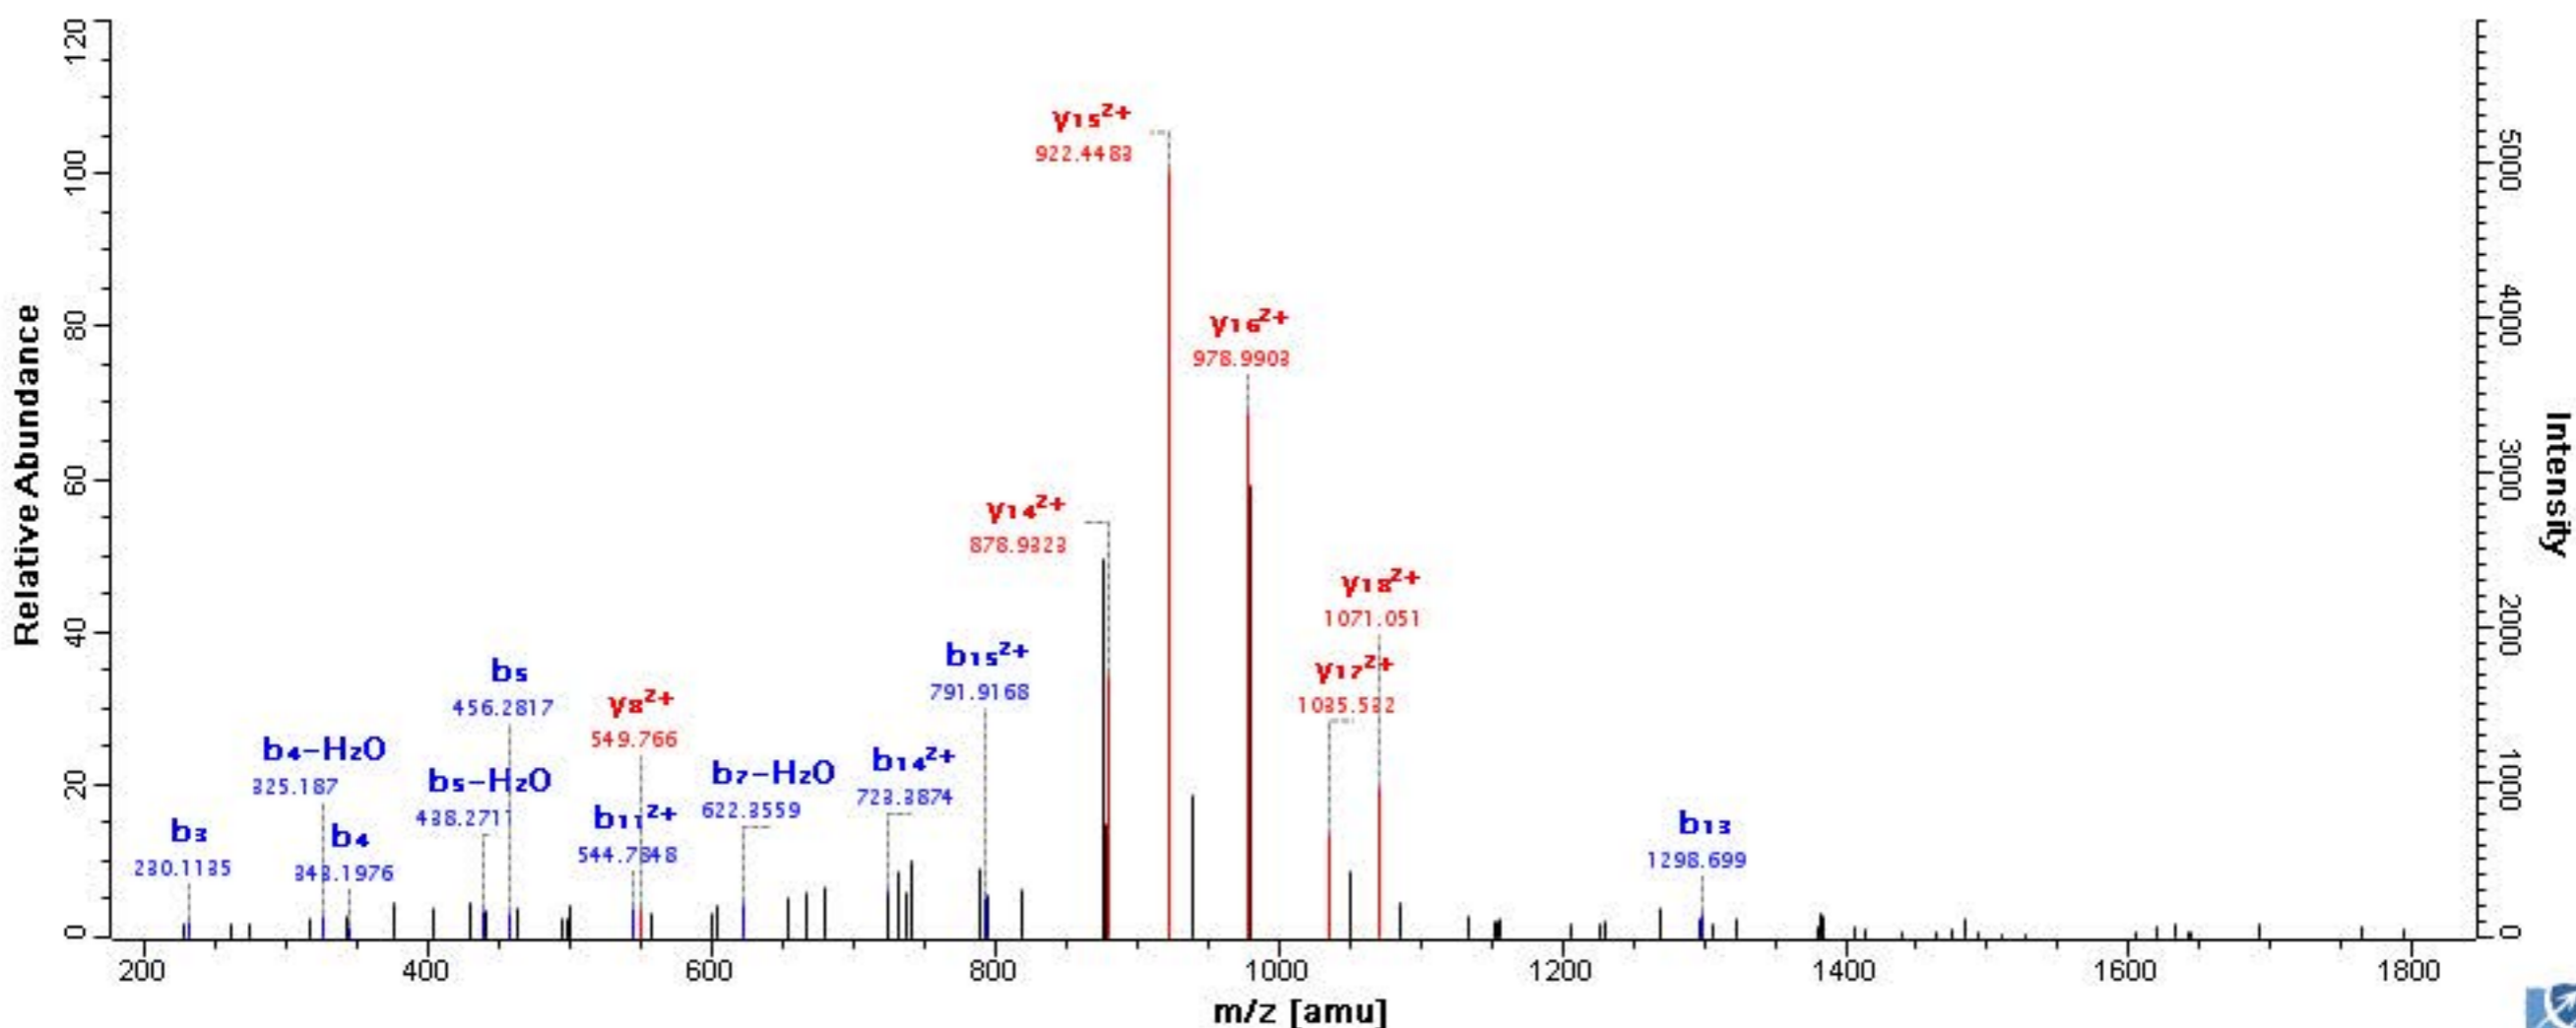

#### precursor information

|                   |                     |
|-------------------|---------------------|
| Mass:             | 0                   |
| m/z:              | System.Collections. |
| Charge:           | System.Collections. |
| Retentiontime:    | System.Collections. |
| Score:            | 54.2806             |
| Mass Error [ppm]: | -0.37093            |
| PEP:              | 0.25022             |
| Precursor Type:   | PEAK                |

| b <sup>2+</sup> ion |          | b ion     |          |    |     |    | γ ion    |      | γ <sup>2+</sup> ion |           |
|---------------------|----------|-----------|----------|----|-----|----|----------|------|---------------------|-----------|
| Δ dalton            | mass     | Δ dalton  | mass     |    | seq |    | Δ dalton | mass | Δ dalton            | mass      |
|                     | 88.0393  |           | 88.0393  | 1  | S   | 19 |          |      |                     |           |
|                     | 159.0764 |           | 159.0764 | 2  | A   | 18 | 2212.132 |      | 2212.132            |           |
|                     | 230.1135 | -0.027412 | 230.1135 | 3  | A   | 17 | 2141.095 |      | 1071.051            | +0.332003 |
|                     | 343.1976 | +0.015538 | 343.1976 | 4  | I   | 16 | 2070.057 |      | 1035.532            | +0.456761 |
|                     | 456.2817 | +0.125261 | 456.2817 | 5  | I   | 15 | 1956.973 |      | 978.9903            | -0.0067   |
|                     | 543.3137 |           | 543.3137 | 6  | S   | 14 | 1843.889 |      | 922.4483            | +0.269218 |
|                     | 640.3665 |           | 640.3665 | 7  | P   | 13 | 1756.857 |      | 878.9323            | +0.444046 |
|                     | 711.4036 |           | 711.4036 | 8  | A   | 12 | 1659.805 |      | 1659.805            |           |
|                     | 840.4462 |           | 840.4462 | 9  | E   | 11 | 1588.767 |      | 1588.767            |           |
|                     | 941.4938 |           | 941.4938 | 10 | T   | 10 | 1459.725 |      | 1459.725            |           |
| -0.446629           | 544.7848 |           | 1088.562 | 11 | F   | 9  | 1358.677 |      | 1358.677            |           |
|                     | 1201.646 |           | 1201.646 | 12 | I   | 8  | 1211.609 |      | 1211.609            |           |
|                     | 1298.699 | +0.000993 | 1298.699 | 13 | P   | 7  | 1098.525 |      | 549.766             | -0.001396 |
| +0.161626           | 723.3874 |           | 1445.767 | 14 | F   | 6  | 1001.472 |      | 1001.472            |           |
| +0.303557           | 791.9168 |           | 1582.826 | 15 | H   | 5  | 854.4035 |      | 854.4035            |           |
|                     | 1719.885 |           | 1719.885 | 16 | H   | 4  | 717.3446 |      | 717.3446            |           |
|                     | 1834.912 |           | 1834.912 | 17 | D   | 3  | 580.2857 |      | 580.2857            |           |
|                     | 1981.981 |           | 1981.981 | 18 | F   | 2  | 465.2587 |      | 465.2587            |           |
|                     | 2145.044 |           | 2145.044 | 19 | Y   | 1  | 318.1903 |      | 318.1903            |           |
|                     |          |           |          | 20 | K   | 0  | 155.127  |      | 155.127             |           |

#### general information

|                       |             |
|-----------------------|-------------|
| Annotation:           | 9 of 20     |
| AminoAcids Coverage:  | 45 %        |
| Intensity Coverage:   | 39 %        |
| Protein Localisation: | 149 ... 168 |

Source: 20120602\_VR\_Bsu\_TripleSILAC\_WTPPrkCPrpC\_OG\_F08  
 Scannumber: 16578  
 Protein: BSU14250; cse15; yknT  
 Peptide Score: 118.5  
 Method: ITMS; CID; 3

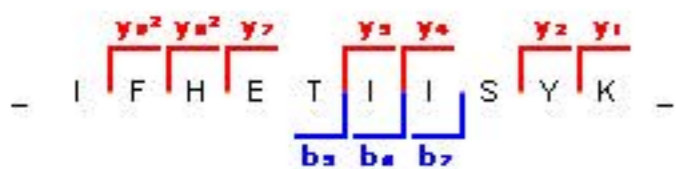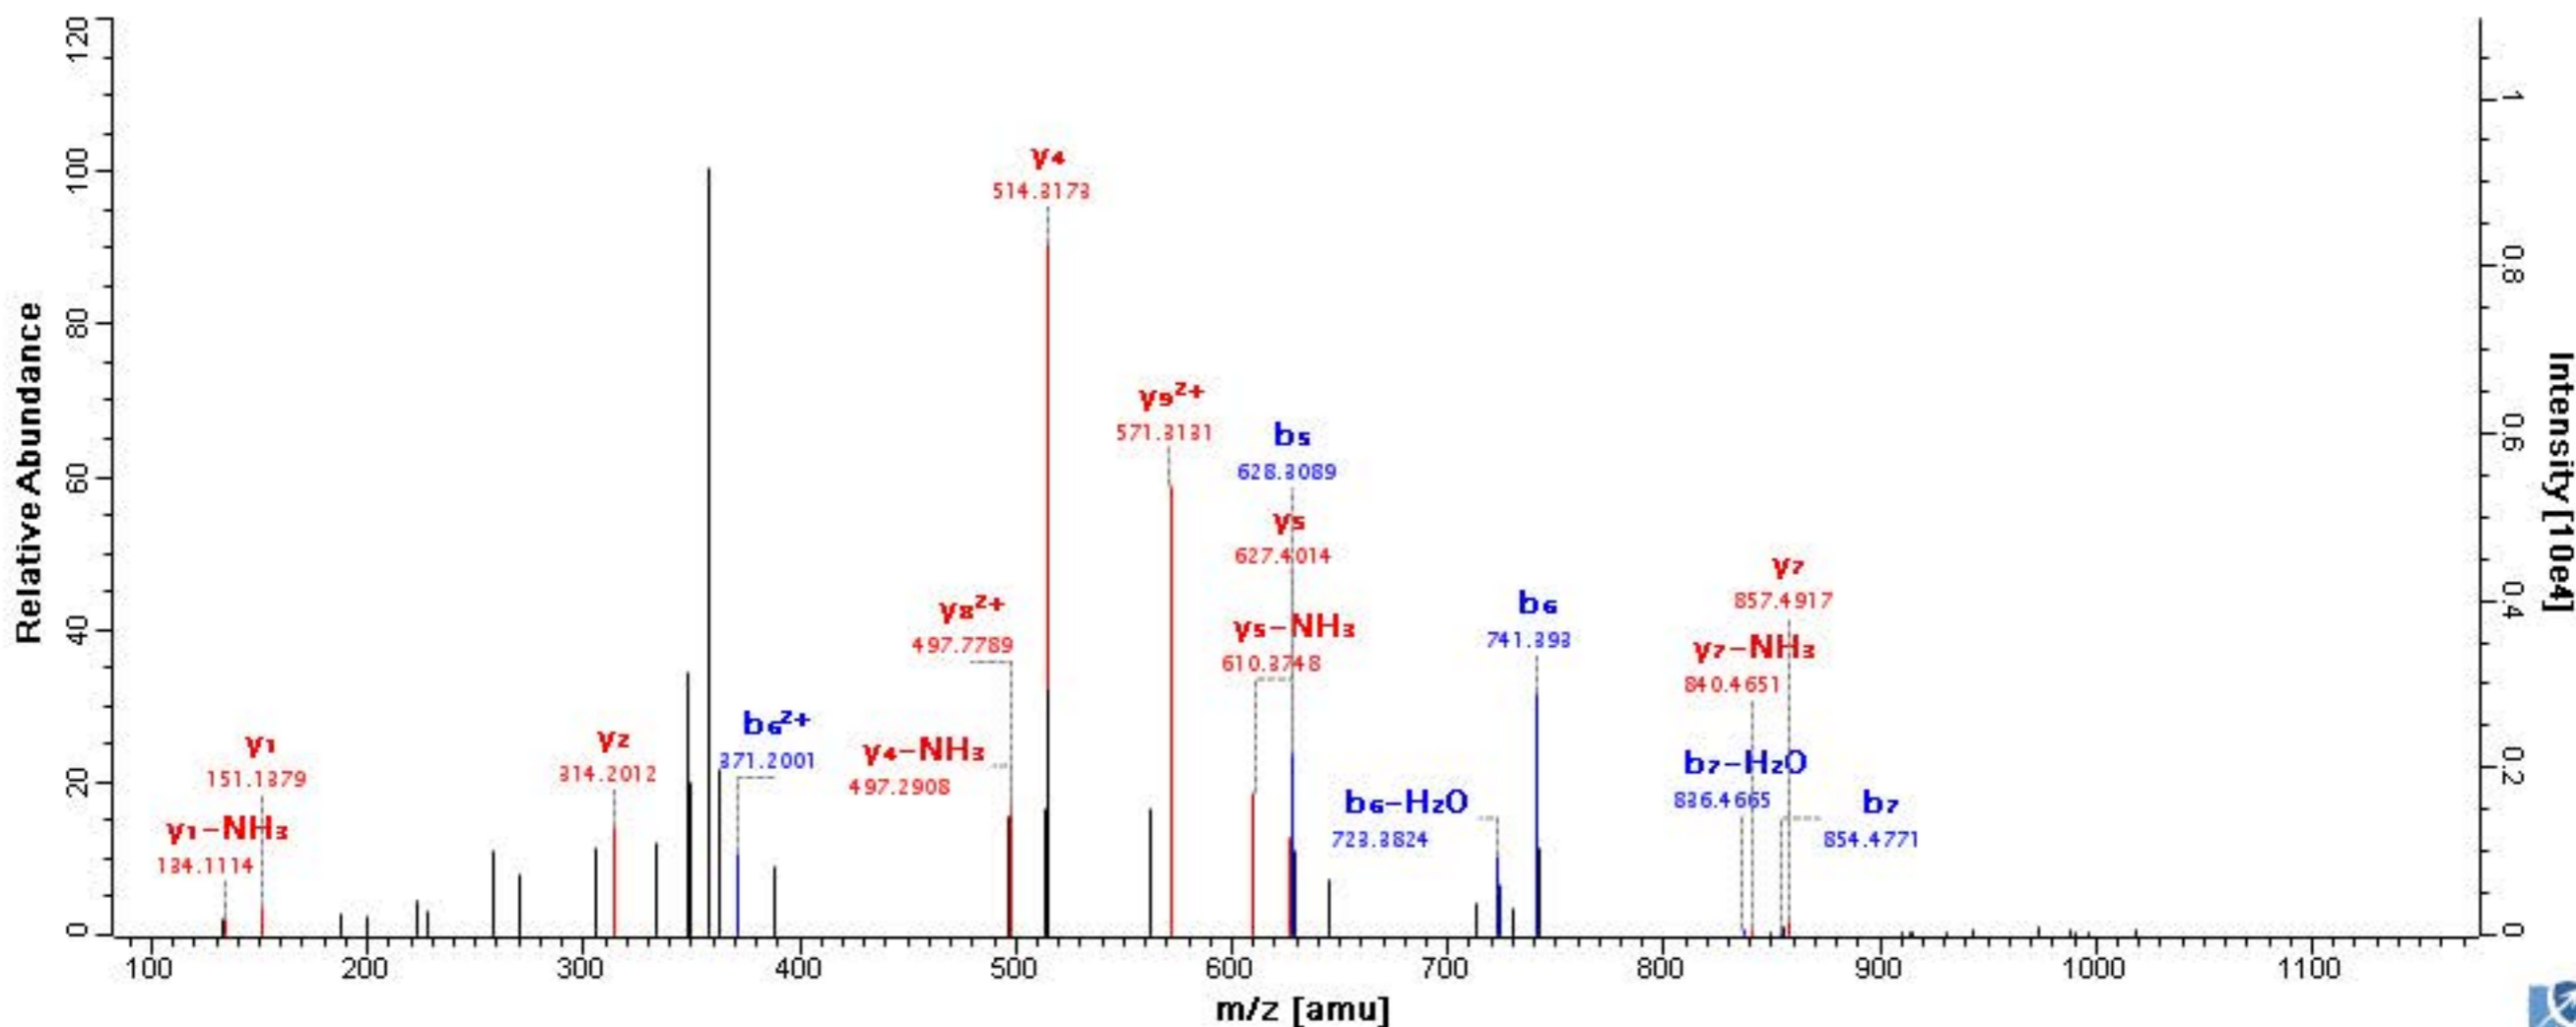

#### precursor information

|                   |                     |
|-------------------|---------------------|
| Mass:             | 1253.69593          |
| m/z:              | System.Collections. |
| Charge:           | System.Collections. |
| Retentiontime:    | System.Collections. |
| Score:            | 118.4951            |
| Mass Error [ppm]: | 0.12088             |
| PEP:              | 0.00040182          |
| Precursor Type:   | ISO                 |

#### general information

|                       |             |
|-----------------------|-------------|
| Annotation:           | 8 of 10     |
| AminoAcids Coverage:  | 80 %        |
| Intensity Coverage:   | 46 %        |
| Protein Localisation: | 205 ... 214 |

| b <sup>2+</sup> ion |          | b ion     |          |     | γ ion |          | γ <sup>2+</sup> ion |           |          |
|---------------------|----------|-----------|----------|-----|-------|----------|---------------------|-----------|----------|
| Δ dalton            | mass     | Δ dalton  | mass     | seq |       | Δ dalton | mass                | Δ dalton  | mass     |
|                     | 114.0913 |           | 114.0913 | 1   | I     | 9        |                     |           |          |
|                     | 261.1598 |           | 261.1598 | 2   | F     | 8        | 1141.619            |           | 571.3131 |
|                     | 398.2187 |           | 398.2187 | 3   | H     | 7        | 994.5506            |           | 497.7789 |
|                     | 527.2613 |           | 527.2613 | 4   | E     | 6        | 857.4917            | +0.277436 | 857.4917 |
|                     | 628.3089 | +0.115073 | 628.3089 | 5   | T     | 5        | 728.4491            |           | 728.4491 |
| +0.114985           | 371.2001 | +0.143436 | 741.393  | 6   | I     | 4        | 627.4014            | -0.022917 | 627.4014 |
|                     | 854.4771 | +0.085678 | 854.4771 | 7   | I     | 3        | 514.3173            | +0.097036 | 514.3173 |
|                     | 941.5091 |           | 941.5091 | 8   | S     | 2        | 401.2333            |           | 401.2333 |
|                     | 1104.572 |           | 1104.572 | 9   | Y     | 1        | 314.2012            | +0.286431 | 314.2012 |
|                     |          |           |          | 10  | K     | 0        | 151.1379            | +0.10977  | 151.1379 |

Source: 201 20602\_VR\_Bsu\_TripleSILAC\_WTPPrkCPrpC\_OG\_F08  
 Scannumber: 16777  
 Protein: BSU35710; tagG  
 Peptide Score: 126.83  
 Method: ITMS; CID; 3

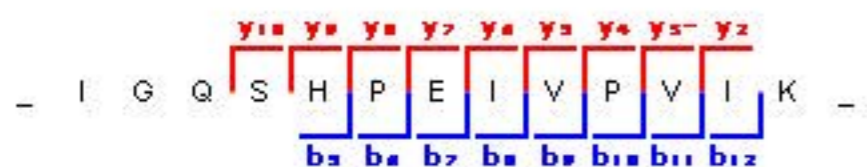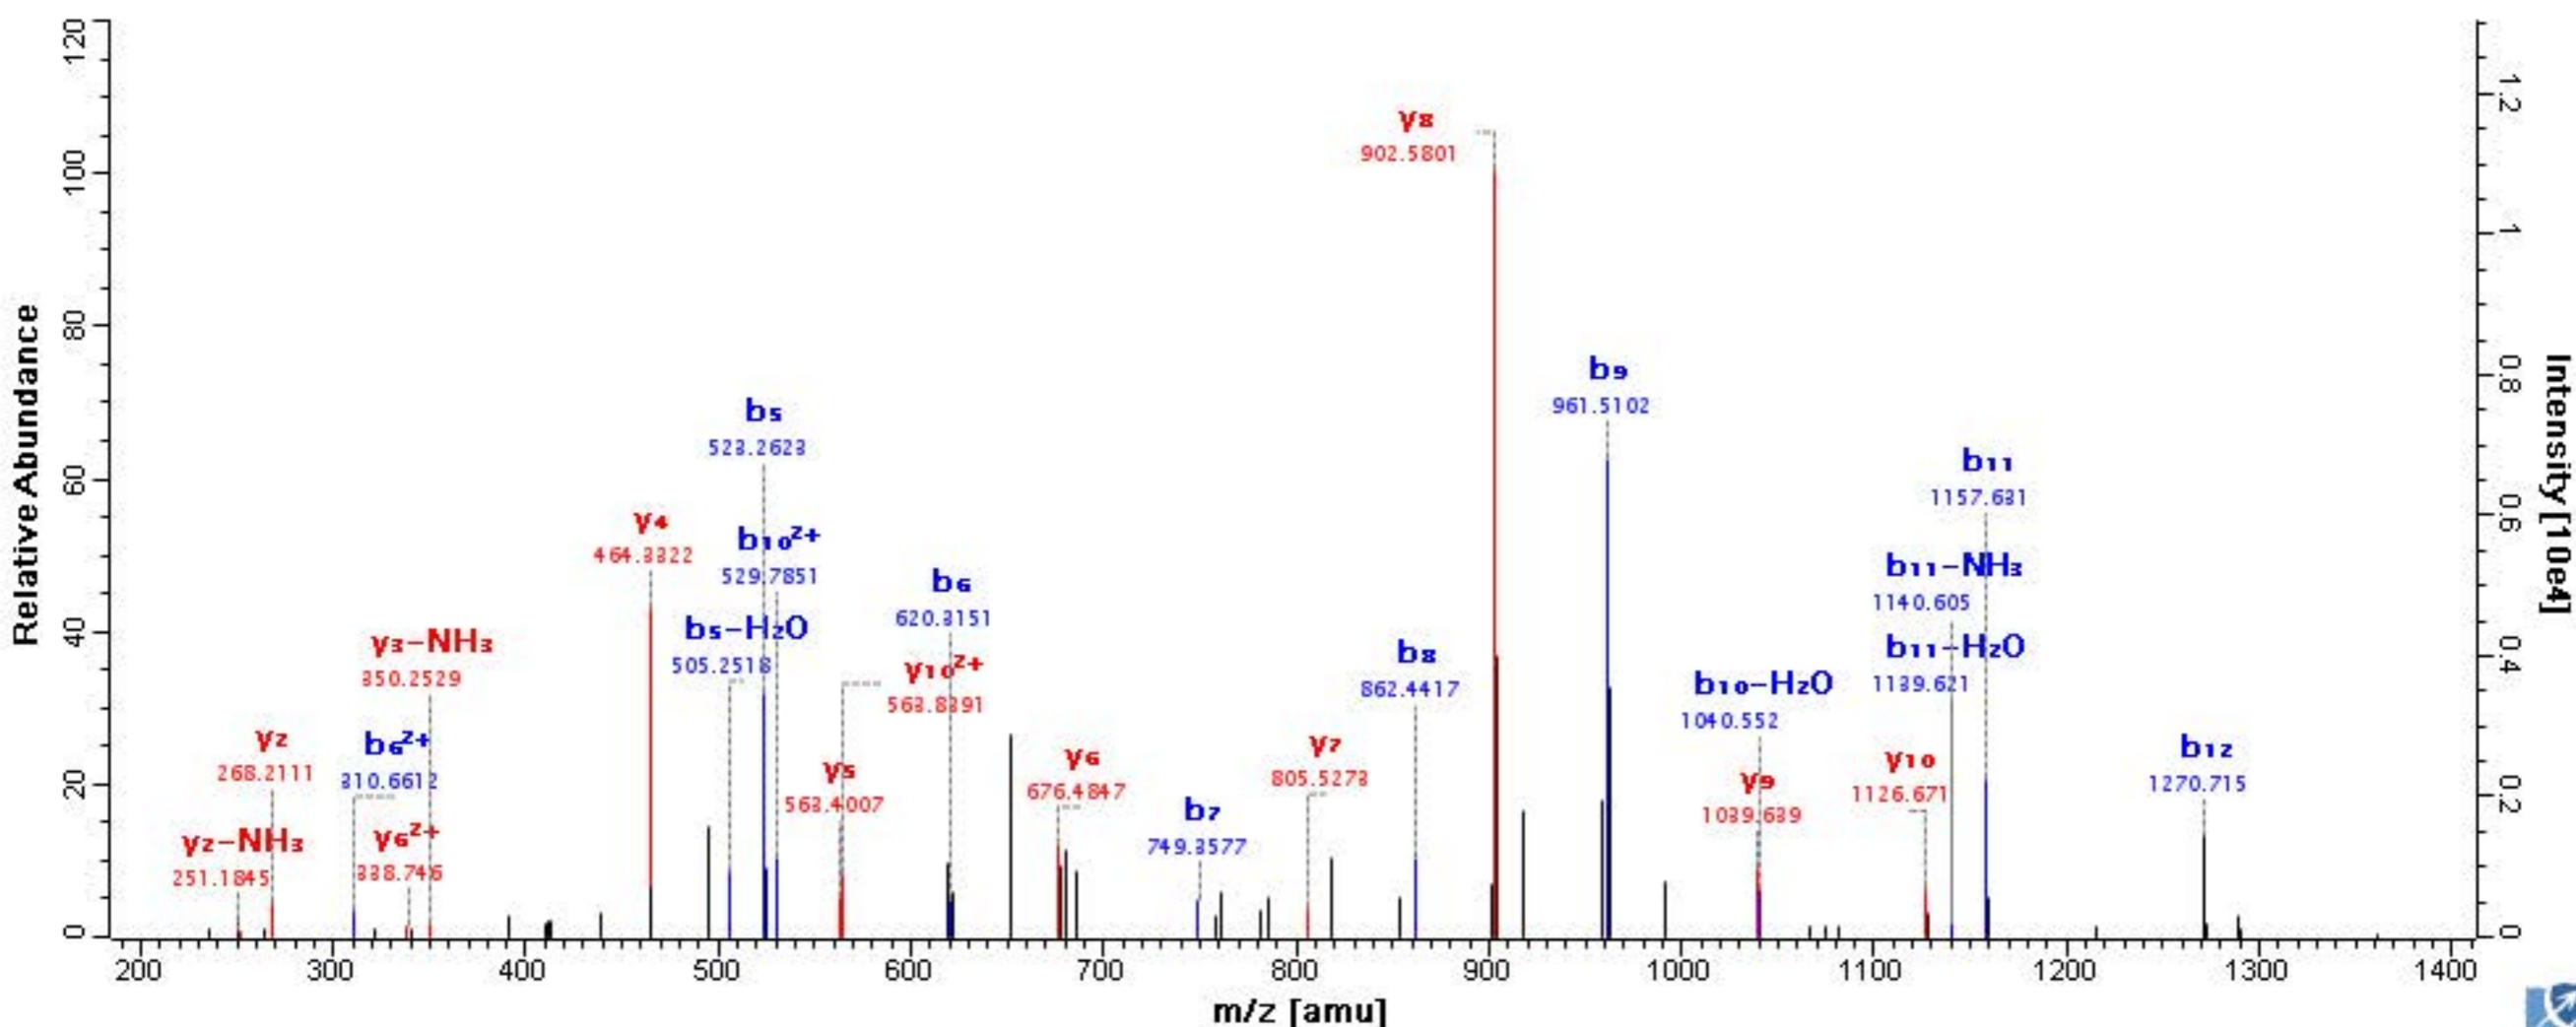

**precursor information**

|                   |                     |
|-------------------|---------------------|
| Mass:             | 1415.81365          |
| m/z:              | System.Collections. |
| Charge:           | System.Collections. |
| Retentiontime:    | System.Collections. |
| Score:            | 126.8319            |
| Mass Error [ppm]: | 0.0014104           |
| PEP:              | 2.5817E-13          |
| Precursor Type:   | MULTI               |

**general information**

|                       |             |
|-----------------------|-------------|
| Annotation:           | 9 of 13     |
| AminoAcids Coverag    | 69 %        |
| Intensity Coverage:   | 56 %        |
| Protein Localisation: | 206 ... 218 |

| b <sup>2+</sup> ion |          | b ion     |          |    | seq |    | γ ion    |           | γ <sup>2+</sup> ion |           |
|---------------------|----------|-----------|----------|----|-----|----|----------|-----------|---------------------|-----------|
| Δ dalton            | mass     | Δ dalton  | mass     |    |     |    | Δ dalton | mass      | Δ dalton            | mass      |
|                     | 114.0913 |           | 114.0913 | 1  | I   | 12 |          |           |                     |           |
|                     | 171.1128 |           | 171.1128 | 2  | G   | 11 | 1311.751 |           | 1311.751            |           |
|                     | 299.1714 |           | 299.1714 | 3  | Q   | 10 | 1254.73  |           | 1254.73             |           |
|                     | 386.2034 |           | 386.2034 | 4  | S   | 9  | 1126.671 | +0.129151 | 563.8391            | -0.059058 |
|                     | 523.2623 | -0.018425 | 523.2623 | 5  | H   | 8  | 1039.639 | +0.025437 | 1039.639            |           |
| -0.400225           | 310.6612 | -0.080284 | 620.3151 | 6  | P   | 7  | 902.5801 | +0.035216 | 902.5801            |           |
|                     | 749.3577 | -0.041273 | 749.3577 | 7  | E   | 6  | 805.5273 | -0.00632  | 805.5273            |           |
|                     | 862.4417 | -0.028352 | 862.4417 | 8  | I   | 5  | 676.4847 | +0.005023 | 338.746             | -0.406217 |
|                     | 961.5102 | +0.040441 | 961.5102 | 9  | V   | 4  | 563.4007 | -0.263696 | 563.4007            |           |
| +0.095944           | 529.7851 |           | 1058.563 | 10 | P   | 3  | 464.3322 | -0.036102 | 464.3322            |           |
|                     | 1157.631 | +0.023206 | 1157.631 | 11 | V   | 2  | 367.2795 |           | 367.2795            |           |
|                     | 1270.715 | -0.011541 | 1270.715 | 12 | I   | 1  | 268.2111 | -0.091743 | 268.2111            |           |
|                     |          |           |          | 13 | K   | 0  | 155.127  |           | 155.127             |           |

Source: 20120602\_VR\_Bsu\_TripleSILAC\_WTPrkCPrpC\_OG\_F08  
 Scannumber: 19218  
 Protein: BSU20010; yojV; yosT  
 Peptide Score: 96.71  
 Method: ITMS; CID; 3

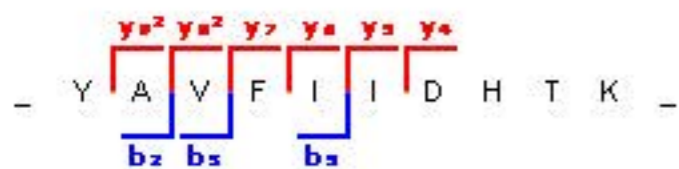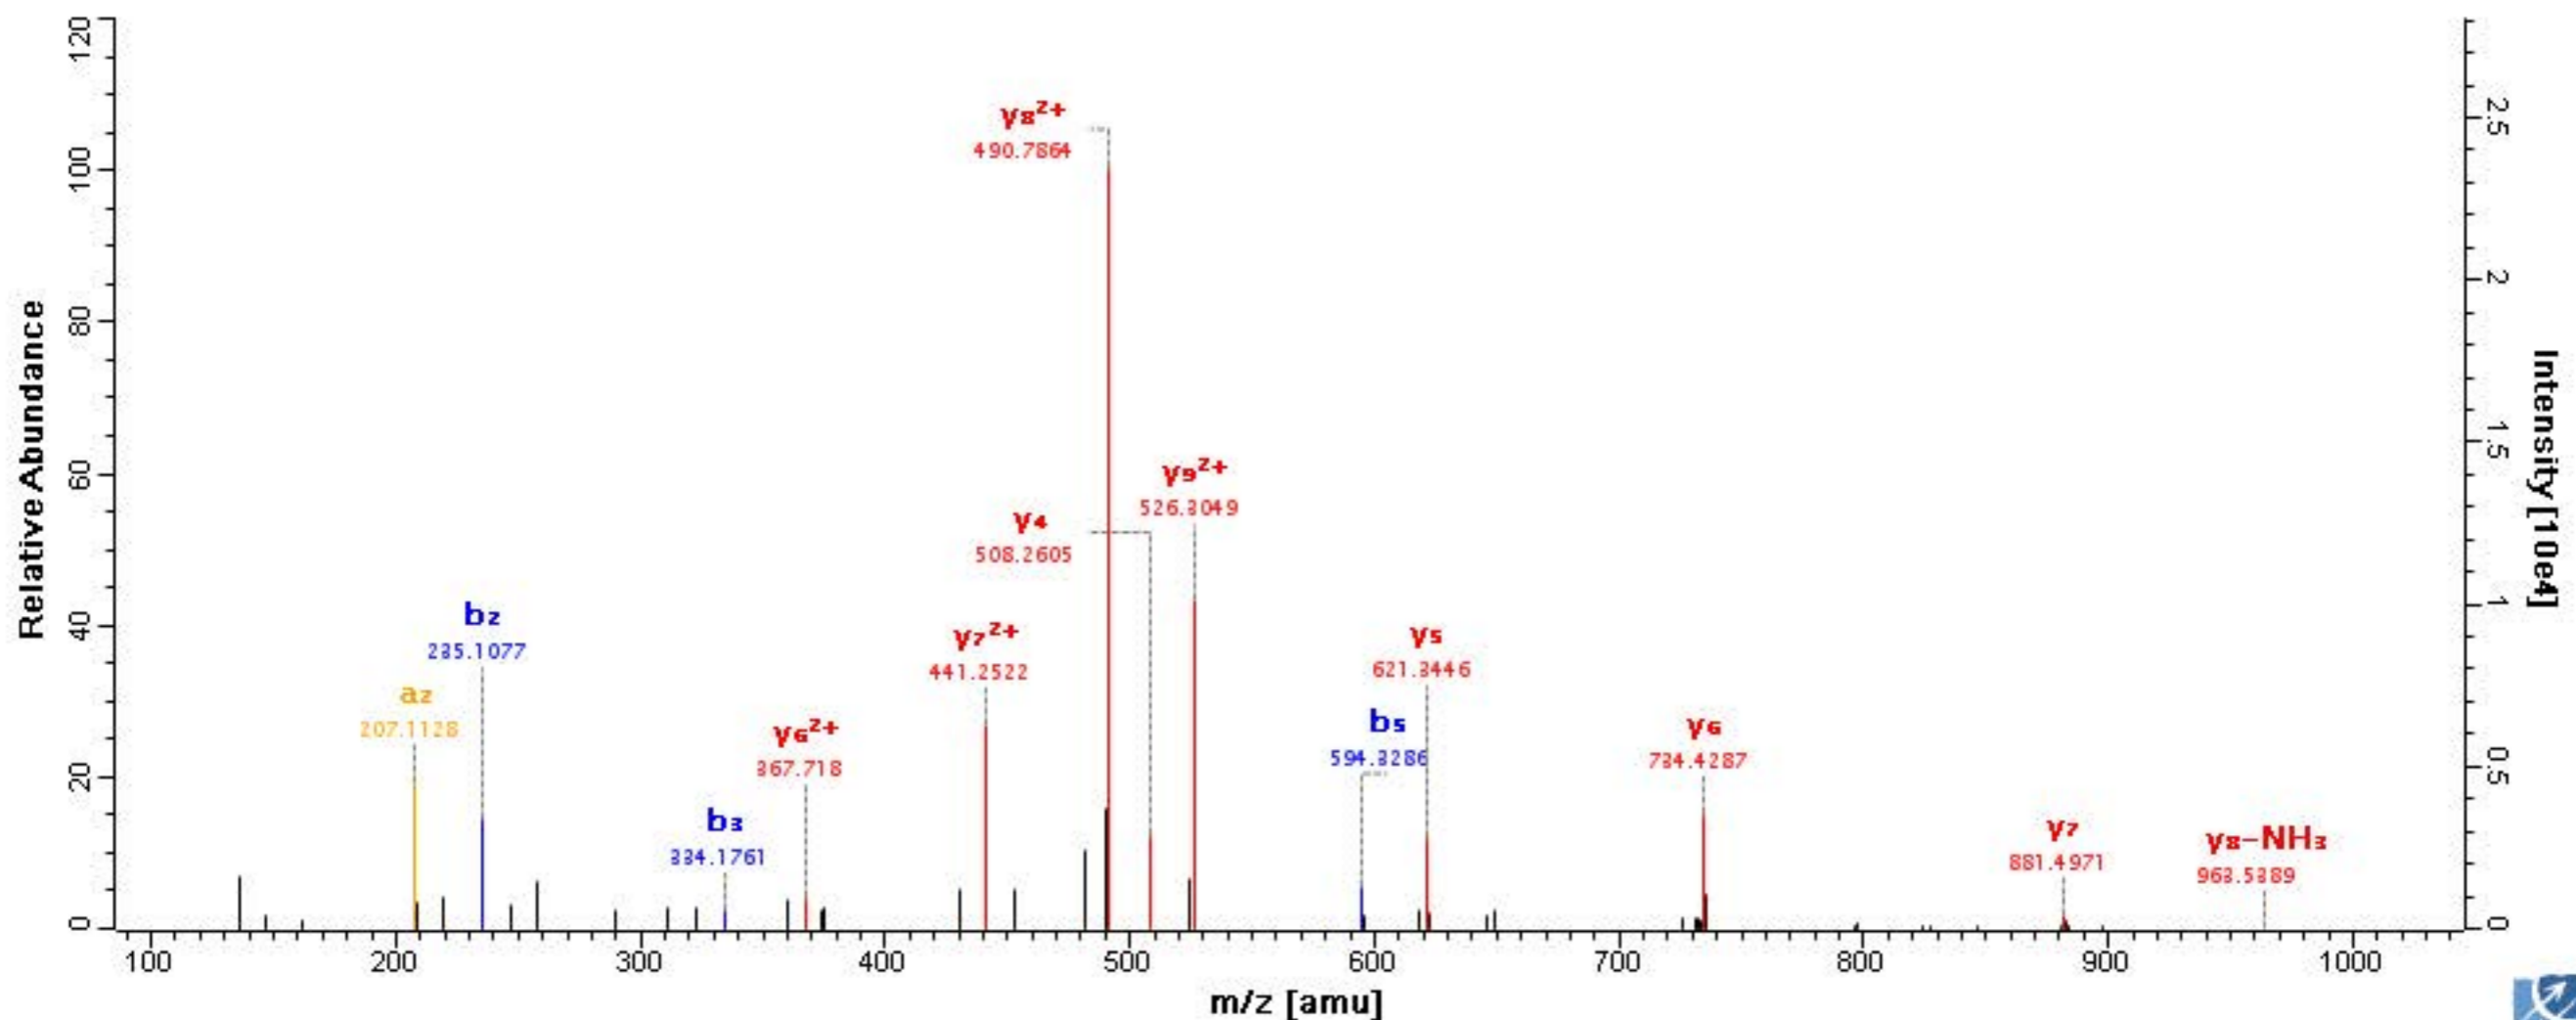

#### precursor information

|                   |                     |
|-------------------|---------------------|
| Mass:             | 1205.64496          |
| m/z:              | System.Collections. |
| Charge:           | System.Collections. |
| Retentiontime:    | System.Collections. |
| Score:            | 96.71067            |
| Mass Error [ppm]: | 0.4167              |
| PEP:              | 0.00072653          |
| Precursor Type:   | MULTI               |

#### general information

|                       |            |
|-----------------------|------------|
| Annotation:           | 6 of 10    |
| AminoAcids Coverage:  | 60 %       |
| Intensity Coverage:   | 70 %       |
| Protein Localisation: | 93 ... 102 |

| a ion     |          | b ion     |          |    |     |   | γ ion    |           | γ <sup>2+</sup> ion |           |
|-----------|----------|-----------|----------|----|-----|---|----------|-----------|---------------------|-----------|
| Δ dalton  | mass     | Δ dalton  | mass     |    | seq |   | Δ dalton | mass      | Δ dalton            | mass      |
|           | 136.0757 |           | 164.0706 | 1  | Y   | 9 |          |           |                     |           |
| -0.039837 | 207.1128 | -0.054801 | 235.1077 | 2  | A   | 8 | 1051.603 |           | 526.3049            | +0.2022   |
|           | 306.1812 | +0.015213 | 334.1761 | 3  | V   | 7 | 980.5655 |           | 490.7864            | +0.13134  |
|           | 453.2496 |           | 481.2445 | 4  | F   | 6 | 881.4971 | +0.220939 | 441.2522            | +0.154561 |
|           | 566.3337 | +0.043948 | 594.3286 | 5  | I   | 5 | 734.4287 | +0.046739 | 367.718             | +0.289537 |
|           | 679.4178 |           | 707.4127 | 6  | I   | 4 | 621.3446 | +0.23499  | 621.3446            |           |
|           | 794.4447 |           | 822.4396 | 7  | D   | 3 | 508.2605 | -0.010536 | 508.2605            |           |
|           | 931.5036 |           | 959.4985 | 8  | H   | 2 | 393.2336 |           | 393.2336            |           |
|           | 1032.551 |           | 1060.546 | 9  | T   | 1 | 256.1747 |           | 256.1747            |           |
|           |          |           |          | 10 | K   | 0 | 155.127  |           | 155.127             |           |

Source: 20120602\_VR\_Bsu\_TripleSILAC\_WTPrkCPrpC\_OG\_F08  
 Scannumber: 21775  
 Protein: BSU04740; rsbX  
 Peptide Score: 58.89  
 Method: ITMS; CID; 3

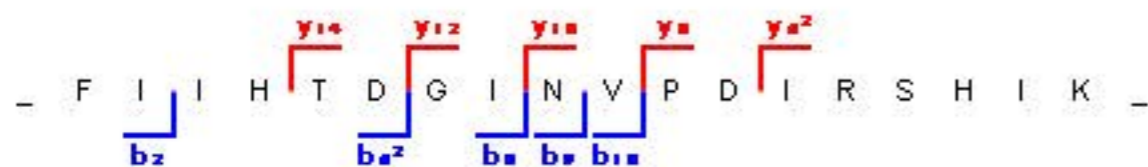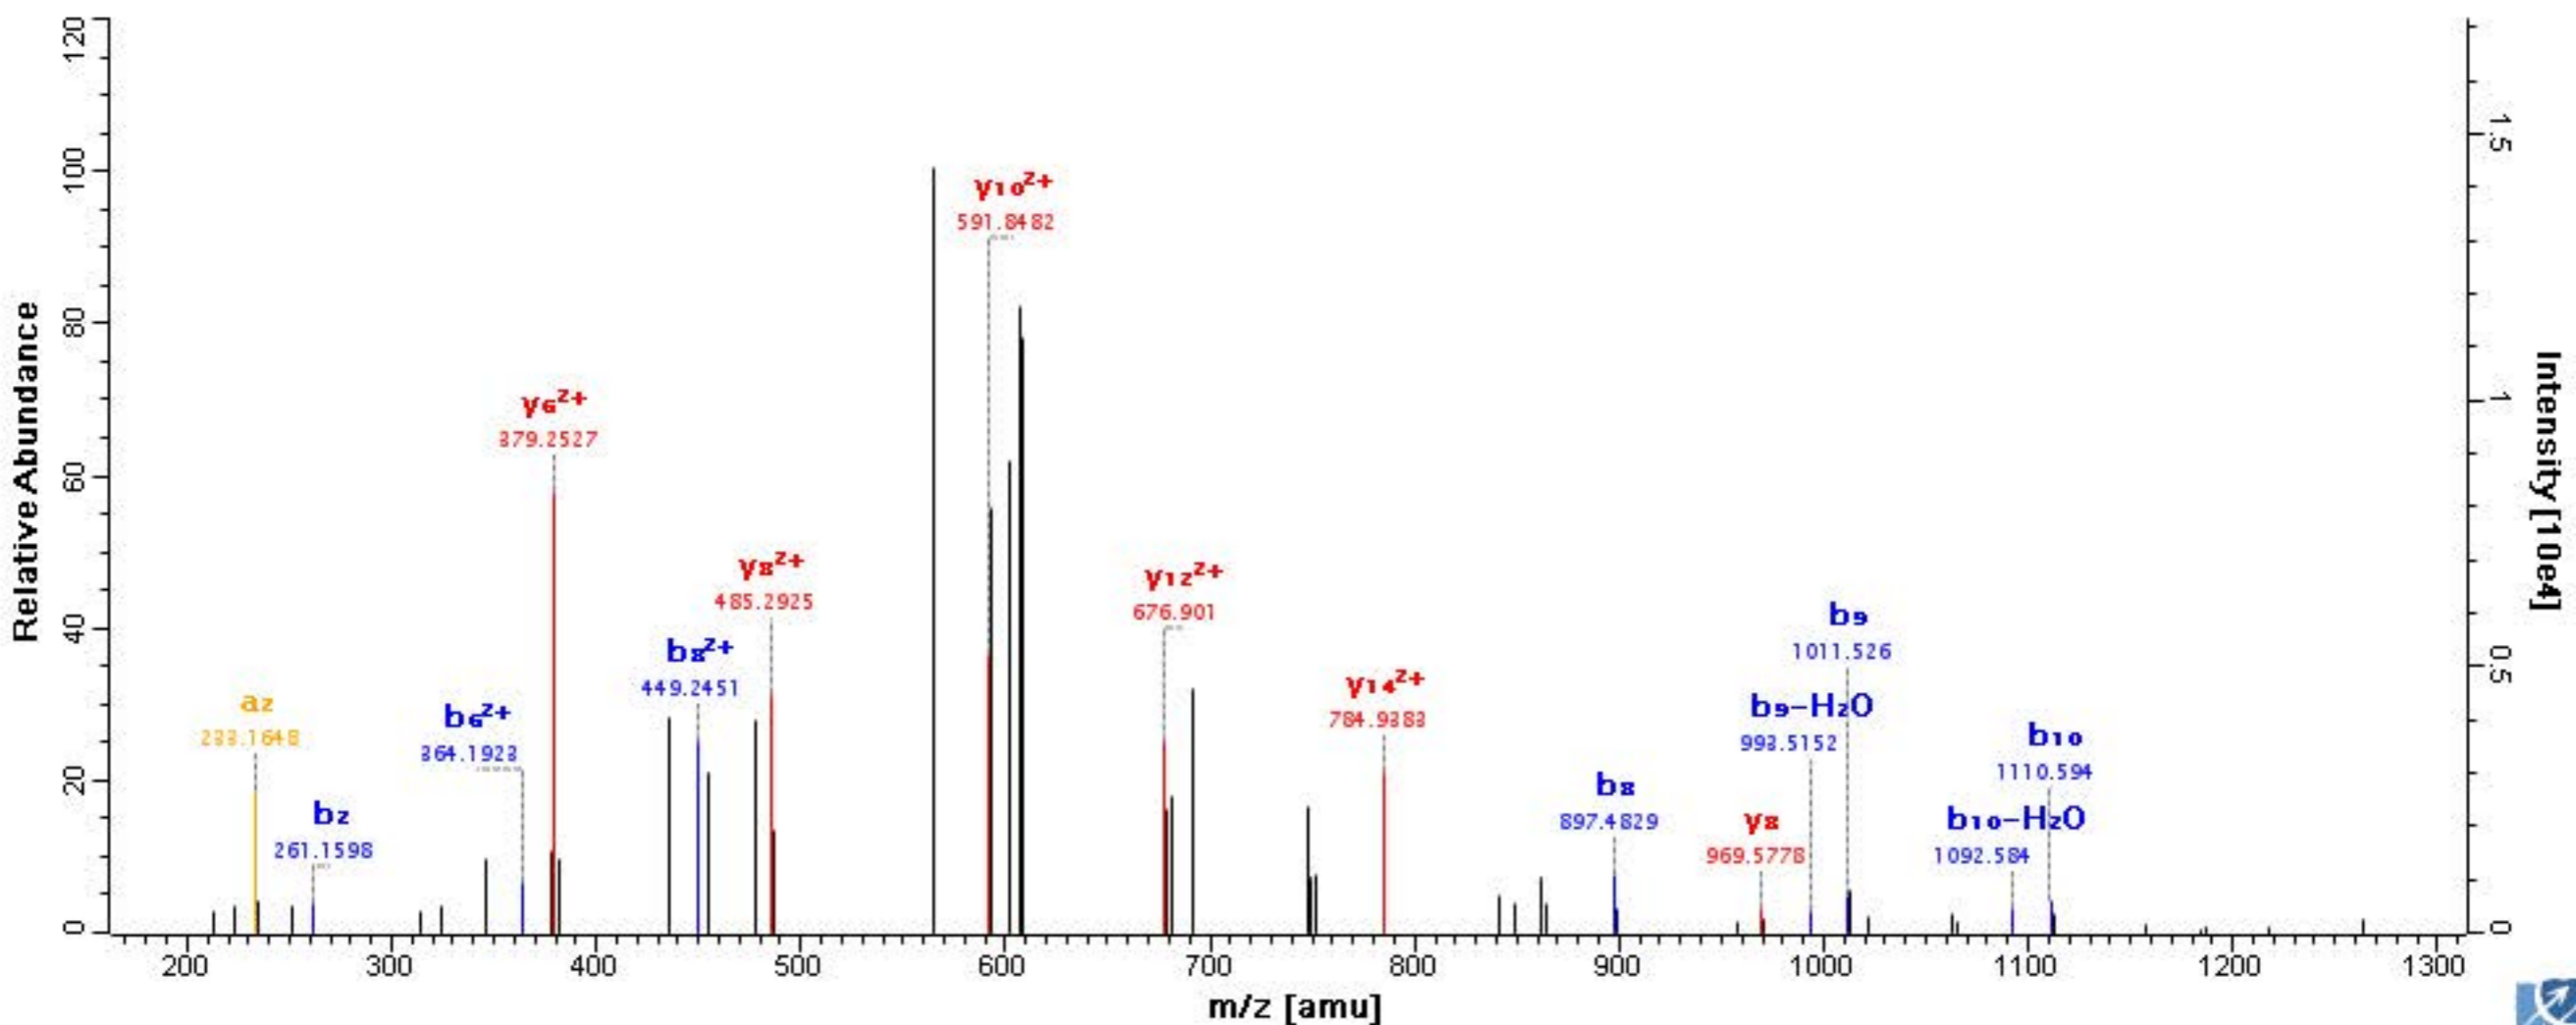

#### precursor information

|                   |                     |
|-------------------|---------------------|
| Mass:             | 2074.13255          |
| m/z:              | System.Collections. |
| Charge:           | System.Collections. |
| Retentiontime:    | System.Collections. |
| Score:            | 58.88521            |
| Mass Error [ppm]: | 0.092511            |
| PEP:              | 0.001564            |
| Precursor Type:   | MULTI               |

#### general information

|                       |             |
|-----------------------|-------------|
| Annotation:           | 9 of 18     |
| AminoAcids Coverage:  | 50 %        |
| Intensity Coverage:   | 27 %        |
| Protein Localisation: | 151 ... 168 |

| a ion    |         | b <sup>2+</sup> ion |         | b ion    |         |    |     |    | y ion    |         | y <sup>2+</sup> ion |         |
|----------|---------|---------------------|---------|----------|---------|----|-----|----|----------|---------|---------------------|---------|
| Δ dalton | mass    | Δ dalton            | mass    | Δ dalton | mass    |    | seq |    | Δ dalton | mass    | Δ dalton            | mass    |
|          | 120.081 |                     | 148.076 |          | 148.076 | 1  | F   | 17 |          |         |                     |         |
| -0.0156  | 233.165 |                     | 261.16  | +0.1416  | 261.16  | 2  | I   | 16 | 1932.1   |         | 1932.1              |         |
|          | 346.249 |                     | 374.244 |          | 374.244 | 3  | I   | 15 | 1819.01  |         | 1819.01             |         |
|          | 483.308 |                     | 511.303 |          | 511.303 | 4  | H   | 14 | 1705.93  |         | 1705.93             |         |
|          | 584.355 |                     | 612.35  |          | 612.35  | 5  | T   | 13 | 1568.87  |         | 784.938             | +0.0083 |
|          | 699.382 | +0.0241             | 664.192 |          | 727.377 | 6  | D   | 12 | 1467.82  |         | 1467.82             |         |
|          | 756.404 |                     | 784.399 |          | 784.399 | 7  | G   | 11 | 1352.79  |         | 676.901             | +0.4538 |
|          | 869.488 | +0.1120             | 449.245 | +0.2601  | 897.483 | 8  | I   | 10 | 1295.77  |         | 1295.77             |         |
|          | 983.531 |                     | 1011.53 | +0.3299  | 1011.53 | 9  | N   | 9  | 1182.69  |         | 591.848             | -0.0542 |
|          | 1082.6  |                     | 1110.59 | +0.3346  | 1110.59 | 10 | V   | 8  | 1068.65  |         | 1068.65             |         |
|          | 1179.65 |                     | 1207.65 |          | 1207.65 | 11 | P   | 7  | 969.578  | +0.1588 | 485.293             | +0.0911 |
|          | 1294.68 |                     | 1322.67 |          | 1322.67 | 12 | D   | 6  | 872.525  |         | 872.525             |         |
|          | 1407.76 |                     | 1435.76 |          | 1435.76 | 13 | I   | 5  | 757.498  |         | 379.253             | +0.4060 |
|          | 1563.86 |                     | 1591.86 |          | 1591.86 | 14 | R   | 4  | 644.414  |         | 644.414             |         |
|          | 1650.9  |                     | 1678.89 |          | 1678.89 | 15 | S   | 3  | 488.313  |         | 488.313             |         |
|          | 1787.96 |                     | 1815.95 |          | 1815.95 | 16 | H   | 2  | 401.281  |         | 401.281             |         |
|          | 1901.04 |                     | 1929.03 |          | 1929.03 | 17 | I   | 1  | 264.222  |         | 264.222             |         |
|          |         |                     |         |          |         | 18 | K   | 0  | 151.138  |         | 151.138             |         |

Source: 20120602\_VR\_Bsu\_TripleSILAC\_WTPPrkCPrpC\_OG\_F11  
 Scannumber: 20210  
 Protein: BSU18849; yozV  
 Peptide Score: 177.78  
 Method: ITMS; CID; 3

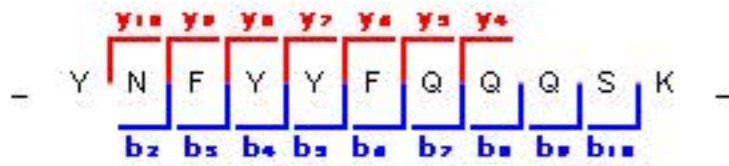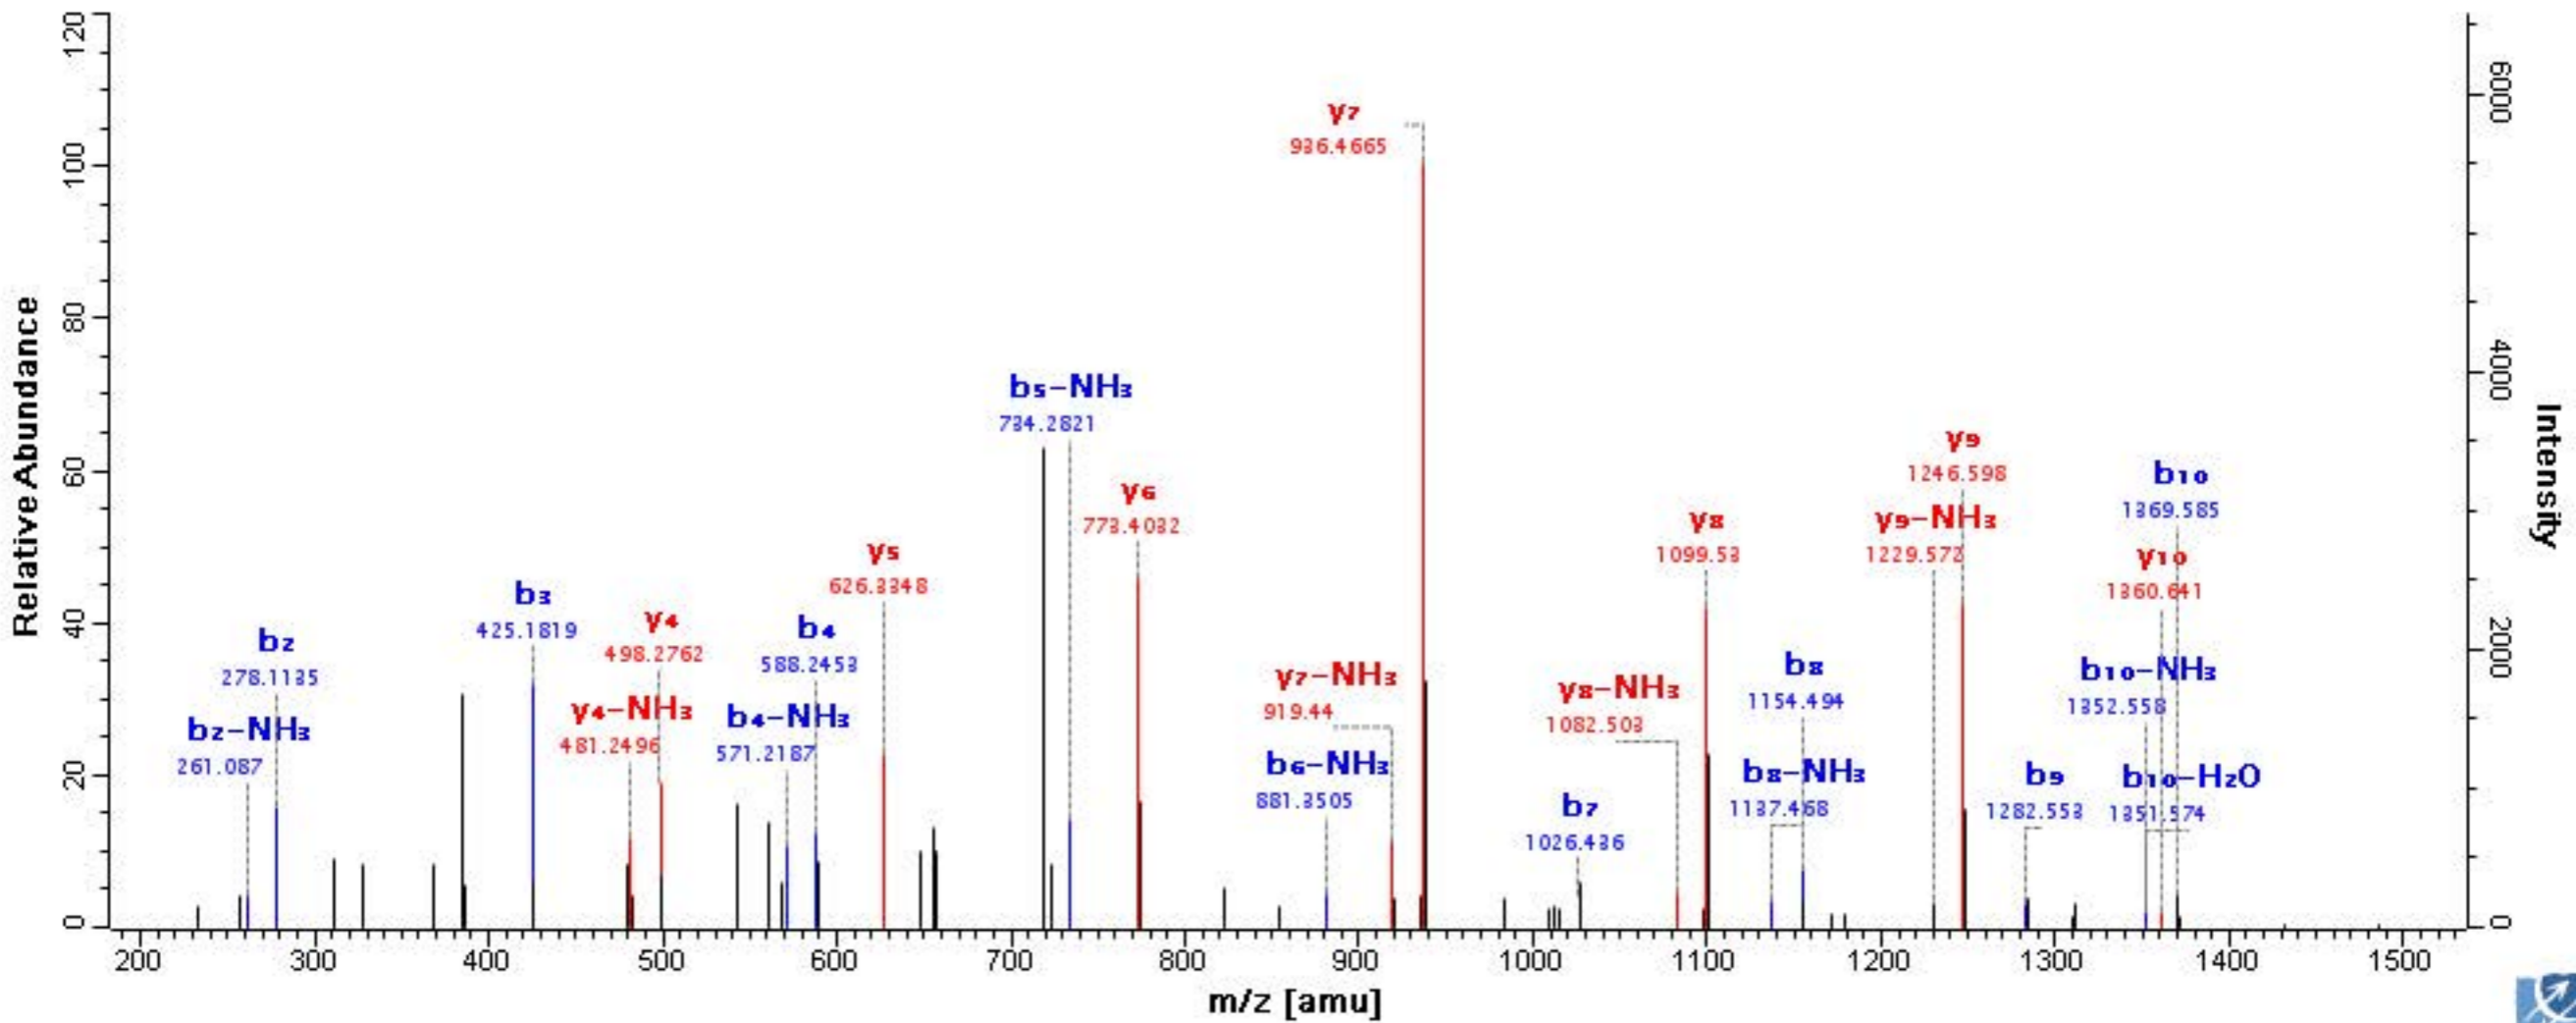

**precursor information**

|                   |                     |
|-------------------|---------------------|
| Mass:             | 1514.68369          |
| m/z:              | System.Collections. |
| Charge:           | System.Collections. |
| Retentiontime:    | System.Collections. |
| Score:            | 177.7784            |
| Mass Error [ppm]: | 0.43305             |
| PEP:              | 5.8564E-49          |
| Precursor Type:   | MULTI               |

**general information**

|                       |           |
|-----------------------|-----------|
| Annotation:           | 9 of 11   |
| AminoAcids Coverage:  | 82 %      |
| Intensity Coverage:   | 48 %      |
| Protein Localisation: | 68 ... 78 |

| b ion      |                |    |     |    |                | γ ion      |  |
|------------|----------------|----|-----|----|----------------|------------|--|
| Δ dalton   | mass           |    | seq |    | Δ dalton       | mass       |  |
|            | 164.070605005  | 1  | Y   | 10 |                |            |  |
| -0.0086435 | 278.113532452  | 2  | N   | 9  | 1360.641176284 | +0.3340434 |  |
| +0.029571  | 425.181946368  | 3  | F   | 8  | 1246.598248837 | +0.2170588 |  |
| +0.134791  | 588.245274907  | 4  | Y   | 7  | 1099.529834921 | +0.105419  |  |
|            | 751.308603445  | 5  | Y   | 6  | 936.466506382  | +0.0036474 |  |
|            | 898.377017361  | 6  | F   | 5  | 773.403177844  | +0.0337118 |  |
| +0.2201668 | 1026.435594872 | 7  | Q   | 4  | 626.334763928  | +0.2680193 |  |
| +0.3558032 | 1154.494172384 | 8  | Q   | 3  | 498.276186416  | +0.1336036 |  |
| +0.3514249 | 1282.552749895 | 9  | Q   | 2  | 370.217608905  |            |  |
| +0.2617793 | 1369.584778305 | 10 | S   | 1  | 242.159031394  |            |  |
|            |                | 11 | K   | 0  | 155.127002984  |            |  |

Source: 201 20602\_VR\_Bsu\_TripleSILAC\_WTPPrkCPrpC\_OG\_F1 2  
 Scannumber: 21791  
 Protein: BSU04320; ydaO  
 Peptide Score: 121.18  
 Method: ITMS; CID; 3

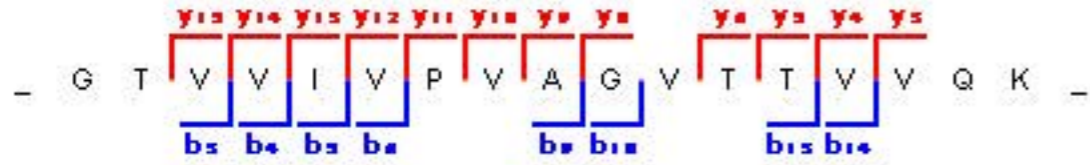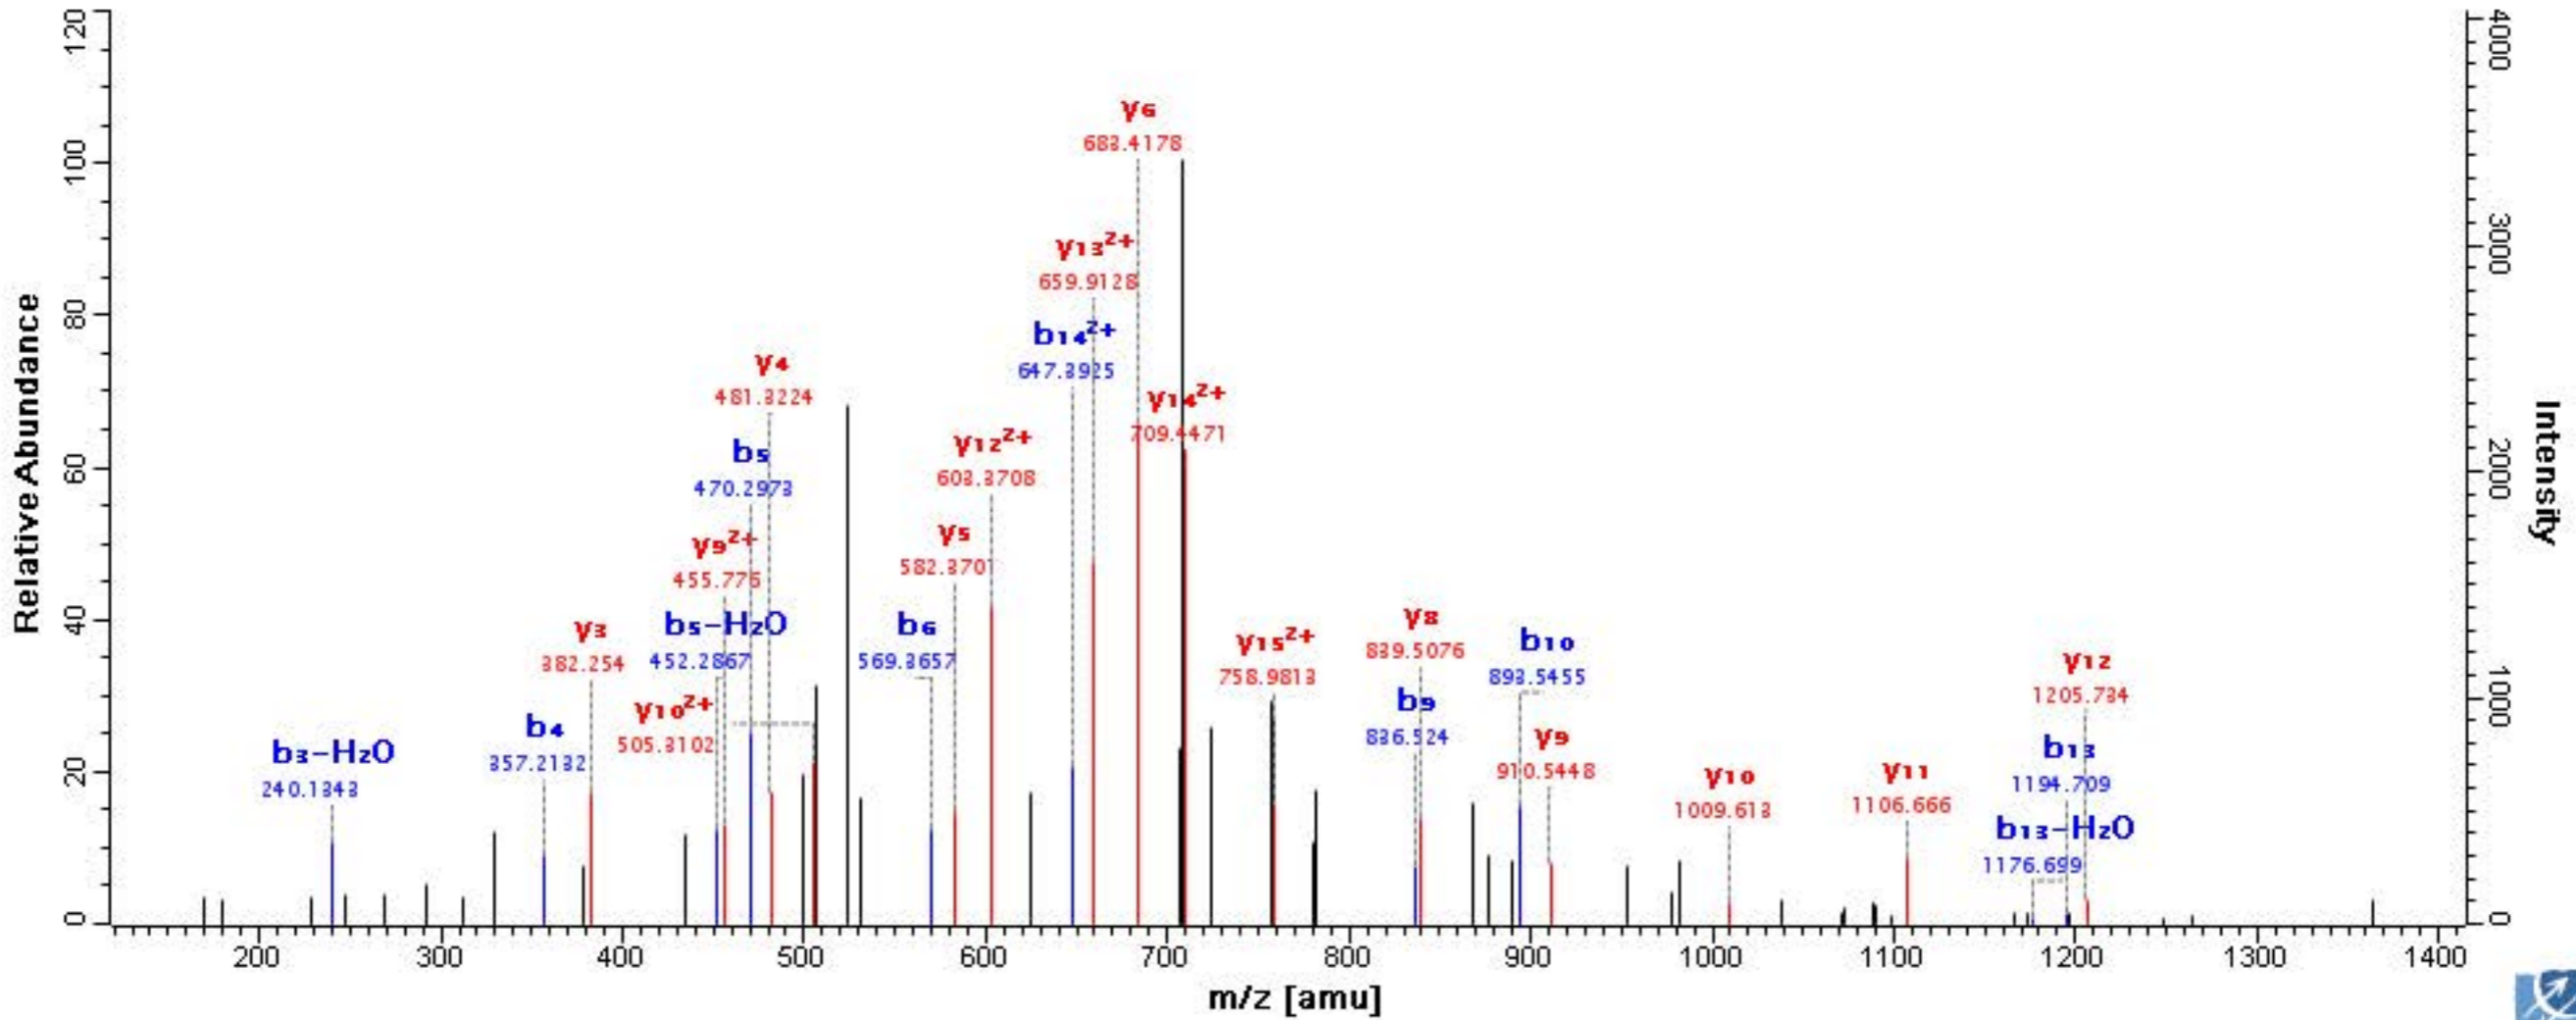

**precursor information**

|                   |                     |
|-------------------|---------------------|
| Mass:             | 1666.00307          |
| m/z:              | System.Collections. |
| Charge:           | System.Collections. |
| Retentiontime:    | System.Collections. |
| Score:            | 121.1825            |
| Mass Error [ppm]: | 0.0984              |
| PEP:              | 4.8181E-20          |
| Precursor Type:   | MULTI               |

| b <sup>2+</sup> ion |          | b ion     |          | seq |   |    | y ion    |           | y <sup>2+</sup> ion |           |
|---------------------|----------|-----------|----------|-----|---|----|----------|-----------|---------------------|-----------|
| Δ dalton            | mass     | Δ dalton  | mass     |     |   |    | Δ dalton | mass      | Δ dalton            | mass      |
|                     | 58.02874 |           | 58.02874 | 1   | G | 16 |          |           |                     |           |
|                     | 159.0764 |           | 159.0764 | 2   | T | 15 | 1618.003 |           | 1618.003            |           |
|                     | 258.1448 |           | 258.1448 | 3   | V | 14 | 1516.955 |           | 758.9813            | +0.335148 |
|                     | 357.2132 | -0.039907 | 357.2132 | 4   | V | 13 | 1417.887 |           | 709.4471            | -0.058807 |
|                     | 470.2973 | +0.032829 | 470.2973 | 5   | I | 12 | 1318.818 |           | 659.9128            | +0.078916 |
|                     | 569.3657 | +0.051146 | 569.3657 | 6   | V | 11 | 1205.734 | +0.236721 | 603.3708            | +0.354163 |
|                     | 666.4185 |           | 666.4185 | 7   | P | 10 | 1106.666 | +0.227864 | 1106.666            |           |
|                     | 765.4869 |           | 765.4869 | 8   | V | 9  | 1009.613 | +0.329029 | 505.3102            | -0.056317 |
|                     | 836.524  | +0.250215 | 836.524  | 9   | A | 8  | 910.5448 | +0.144147 | 455.776             | +0.124374 |
|                     | 893.5455 | +0.241325 | 893.5455 | 10  | G | 7  | 839.5076 | +0.240648 | 839.5076            |           |
|                     | 992.6139 |           | 992.6139 | 11  | V | 6  | 782.4862 |           | 782.4862            |           |
|                     | 1093.662 |           | 1093.662 | 12  | T | 5  | 683.4178 | +0.027608 | 683.4178            |           |
|                     | 1194.709 | +0.320657 | 1194.709 | 13  | T | 4  | 582.3701 | -0.016693 | 582.3701            |           |
| +0.177293           | 647.3925 |           | 1293.778 | 14  | V | 3  | 481.3224 | +0.161845 | 481.3224            |           |
|                     | 1392.846 |           | 1392.846 | 15  | V | 2  | 382.254  | +0.210056 | 382.254             |           |
|                     | 1520.905 |           | 1520.905 | 16  | Q | 1  | 283.1856 |           | 283.1856            |           |
|                     |          |           |          | 17  | K | 0  | 155.127  |           | 155.127             |           |

**general information**

|                       |             |
|-----------------------|-------------|
| Annotation:           | 12 of 17    |
| AminoAcids Coverag    | 71 %        |
| Intensity Coverage:   | 47 %        |
| Protein Localisation: | 473 ... 489 |

Source: 20120602\_VR\_Bsu\_TripleSILAC\_WTPrkCPrpC\_OG\_F12  
 Scannumber: 27269  
 Protein: BSU02460; ycbC  
 Peptide Score: 78.29  
 Method: ITMS; CID; 3

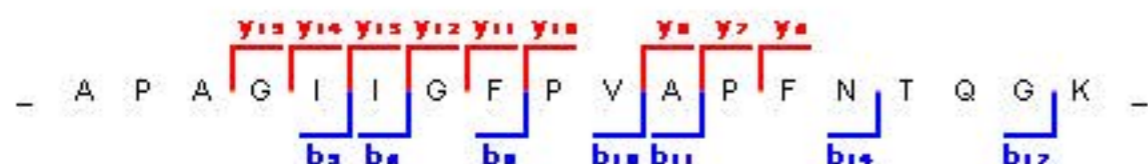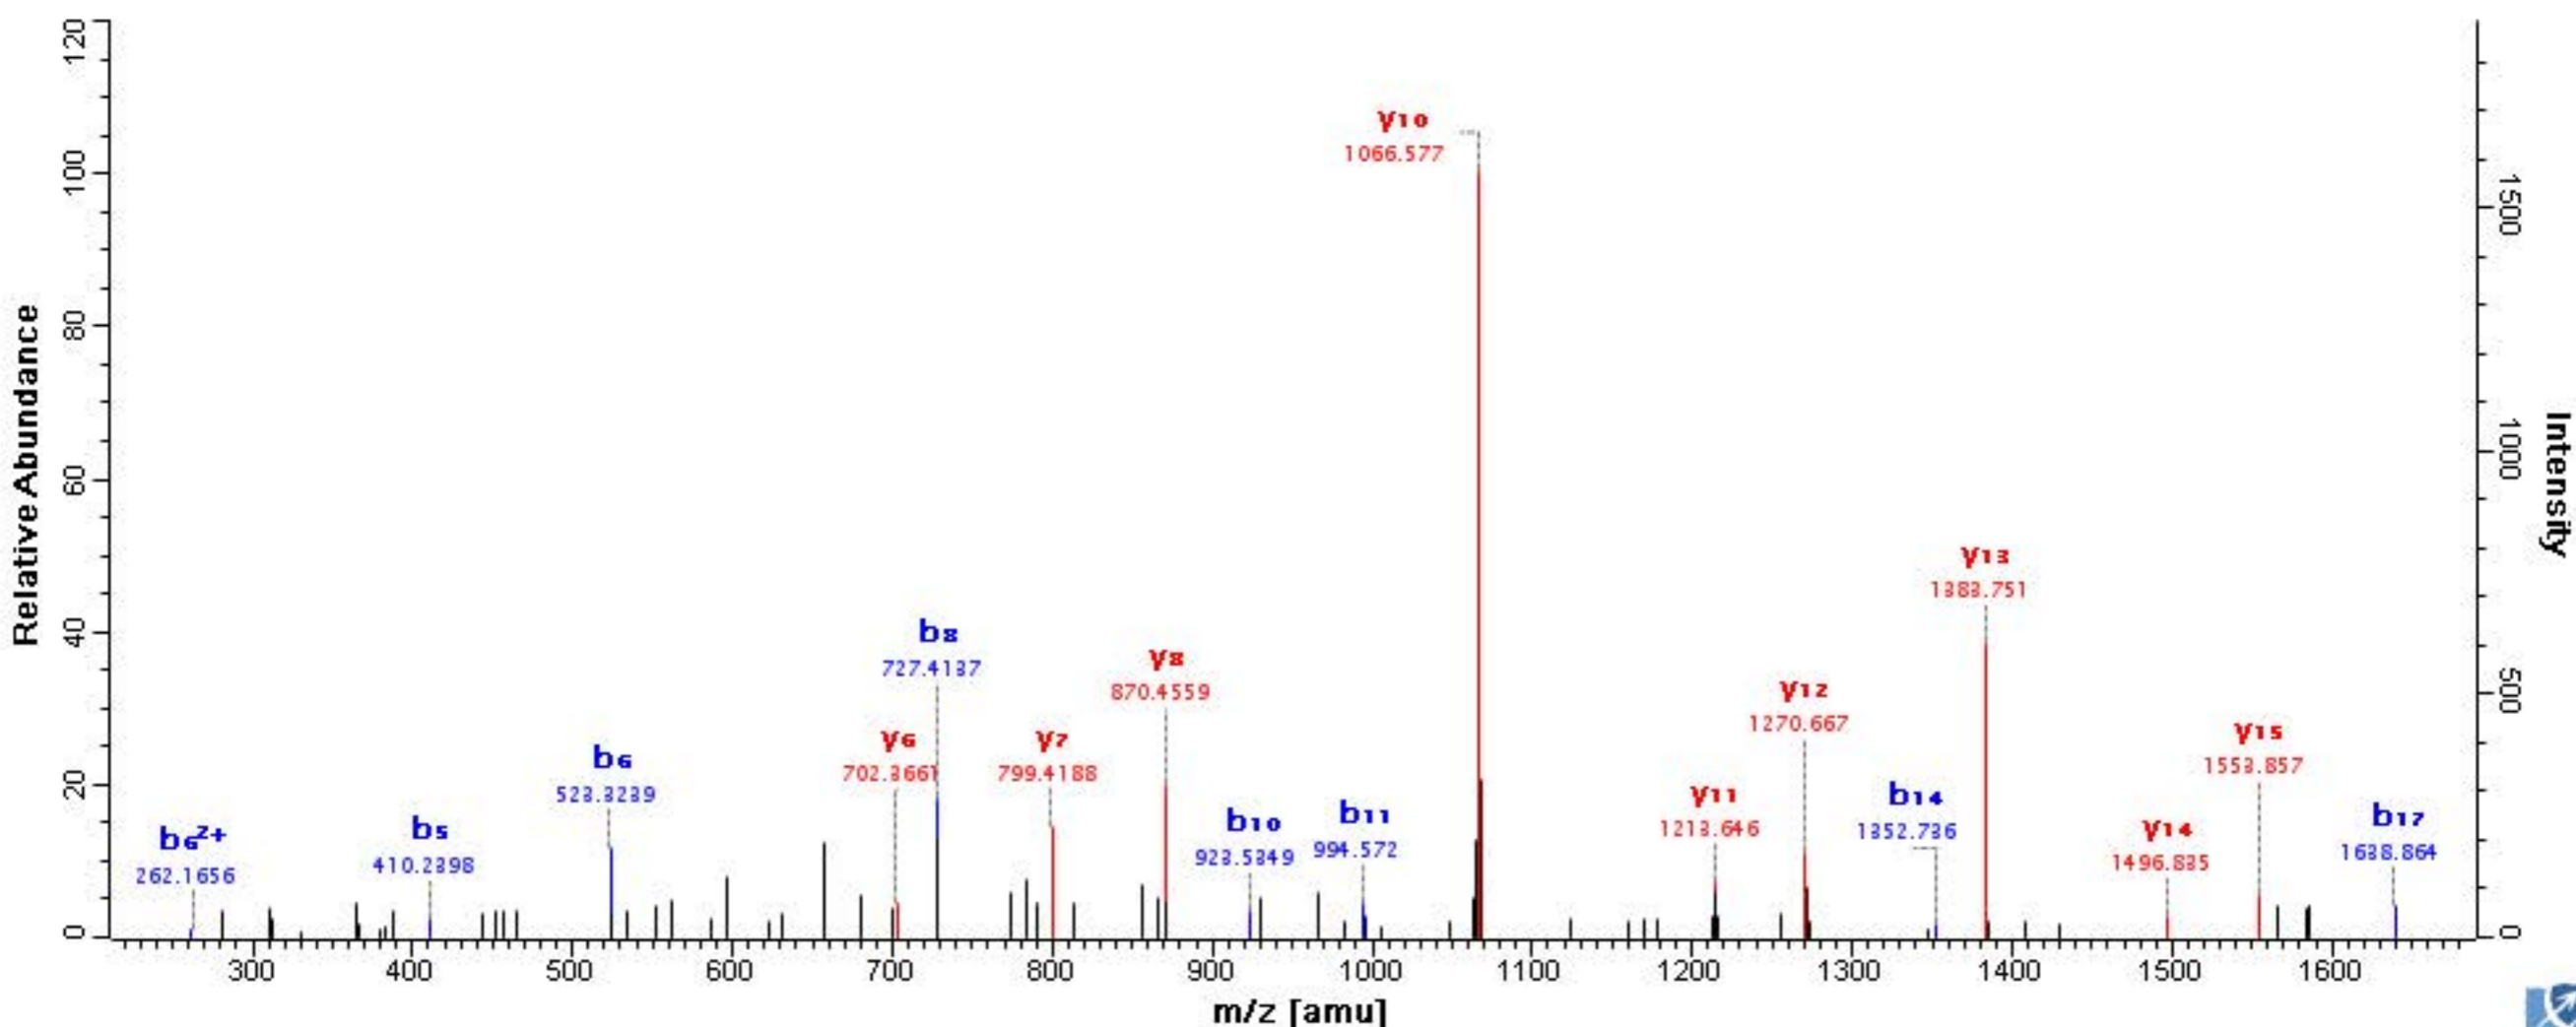

#### precursor information

|                   |                     |
|-------------------|---------------------|
| Mass:             | 1783.96144          |
| m/z:              | System.Collections. |
| Charge:           | System.Collections. |
| Retentiontime:    | System.Collections. |
| Score:            | 78.2854             |
| Mass Error [ppm]: | -0.37319            |
| PEP:              | 3.2514E-07          |
| Precursor Type:   | MULTI               |

| b <sup>2+</sup> ion |              | b ion      |              |    |     |    | y ion        |            |
|---------------------|--------------|------------|--------------|----|-----|----|--------------|------------|
| Δ dalton            | mass         | Δ dalton   | mass         |    | seq |    | Δ dalton     | mass       |
|                     | 72.044390254 |            | 72.044390254 | 1  | A   | 17 |              |            |
|                     | 169.09715411 |            | 169.09715411 | 2  | P   | 16 | 1721.9464664 |            |
|                     | 240.13426789 |            | 240.13426789 | 3  | A   | 15 | 1624.8937026 |            |
|                     | 297.15573162 |            | 297.15573162 | 4  | G   | 14 | 1553.8565888 | +0.2162872 |
|                     | 410.2397956  | +0.0243951 | 410.2397956  | 5  | I   | 13 | 1496.8351251 | +0.0741767 |
| -0.1256815          | 262.16556802 | +0.1610037 | 523.32385958 | 6  | I   | 12 | 1383.7510611 | +0.2331918 |
|                     | 580.3453233  |            | 580.3453233  | 7  | G   | 11 | 1270.6669971 | +0.1774853 |
|                     | 727.41373722 | +0.0356036 | 727.41373722 | 8  | F   | 10 | 1213.6455334 | +0.1941883 |
|                     | 824.46650107 |            | 824.46650107 | 9  | P   | 9  | 1066.5771195 | +0.0762008 |
|                     | 923.53491499 | +0.0814791 | 923.53491499 | 10 | V   | 8  | 969.52435561 |            |
|                     | 994.57202877 | +0.1502002 | 994.57202877 | 11 | A   | 7  | 870.4559417  | +0.0455231 |
|                     | 1091.6247926 |            | 1091.6247926 | 12 | P   | 6  | 799.41882791 | +0.1505691 |
|                     | 1238.6932065 |            | 1238.6932065 | 13 | F   | 5  | 702.36606406 | +0.3373661 |
|                     | 1352.736134  | +0.2027088 | 1352.736134  | 14 | N   | 4  | 555.29765014 |            |
|                     | 1453.7838125 |            | 1453.7838125 | 15 | T   | 3  | 441.25472269 |            |
|                     | 1581.84239   |            | 1581.84239   | 16 | Q   | 2  | 340.20704422 |            |
|                     | 1638.8638537 | +0.422035  | 1638.8638537 | 17 | G   | 1  | 212.14846671 |            |
|                     |              |            |              | 18 | K   | 0  | 155.12700298 |            |

#### general information

|                       |          |
|-----------------------|----------|
| Annotation:           | 13 of 18 |
| AminoAcids Coverag    | 72 %     |
| Intensity Coverage:   | 49 %     |
| Protein Localisation: | 7 ... 24 |



Source: 201 301 24\_VR\_Bsu\_TripleSILAC\_WTPPrkCPrpCReplicate2\_OG\_FD2  
 Scannumber: 19169  
 Protein: BSU20270; yorS  
 Peptide Score: 62.36  
 Method: ITMS; CID; 3

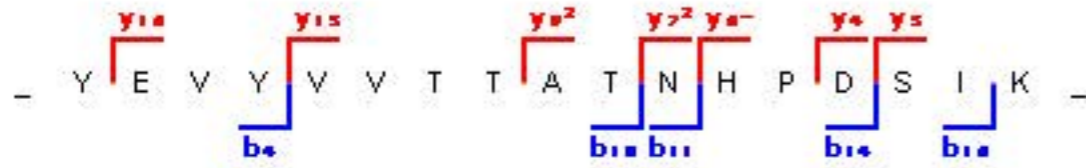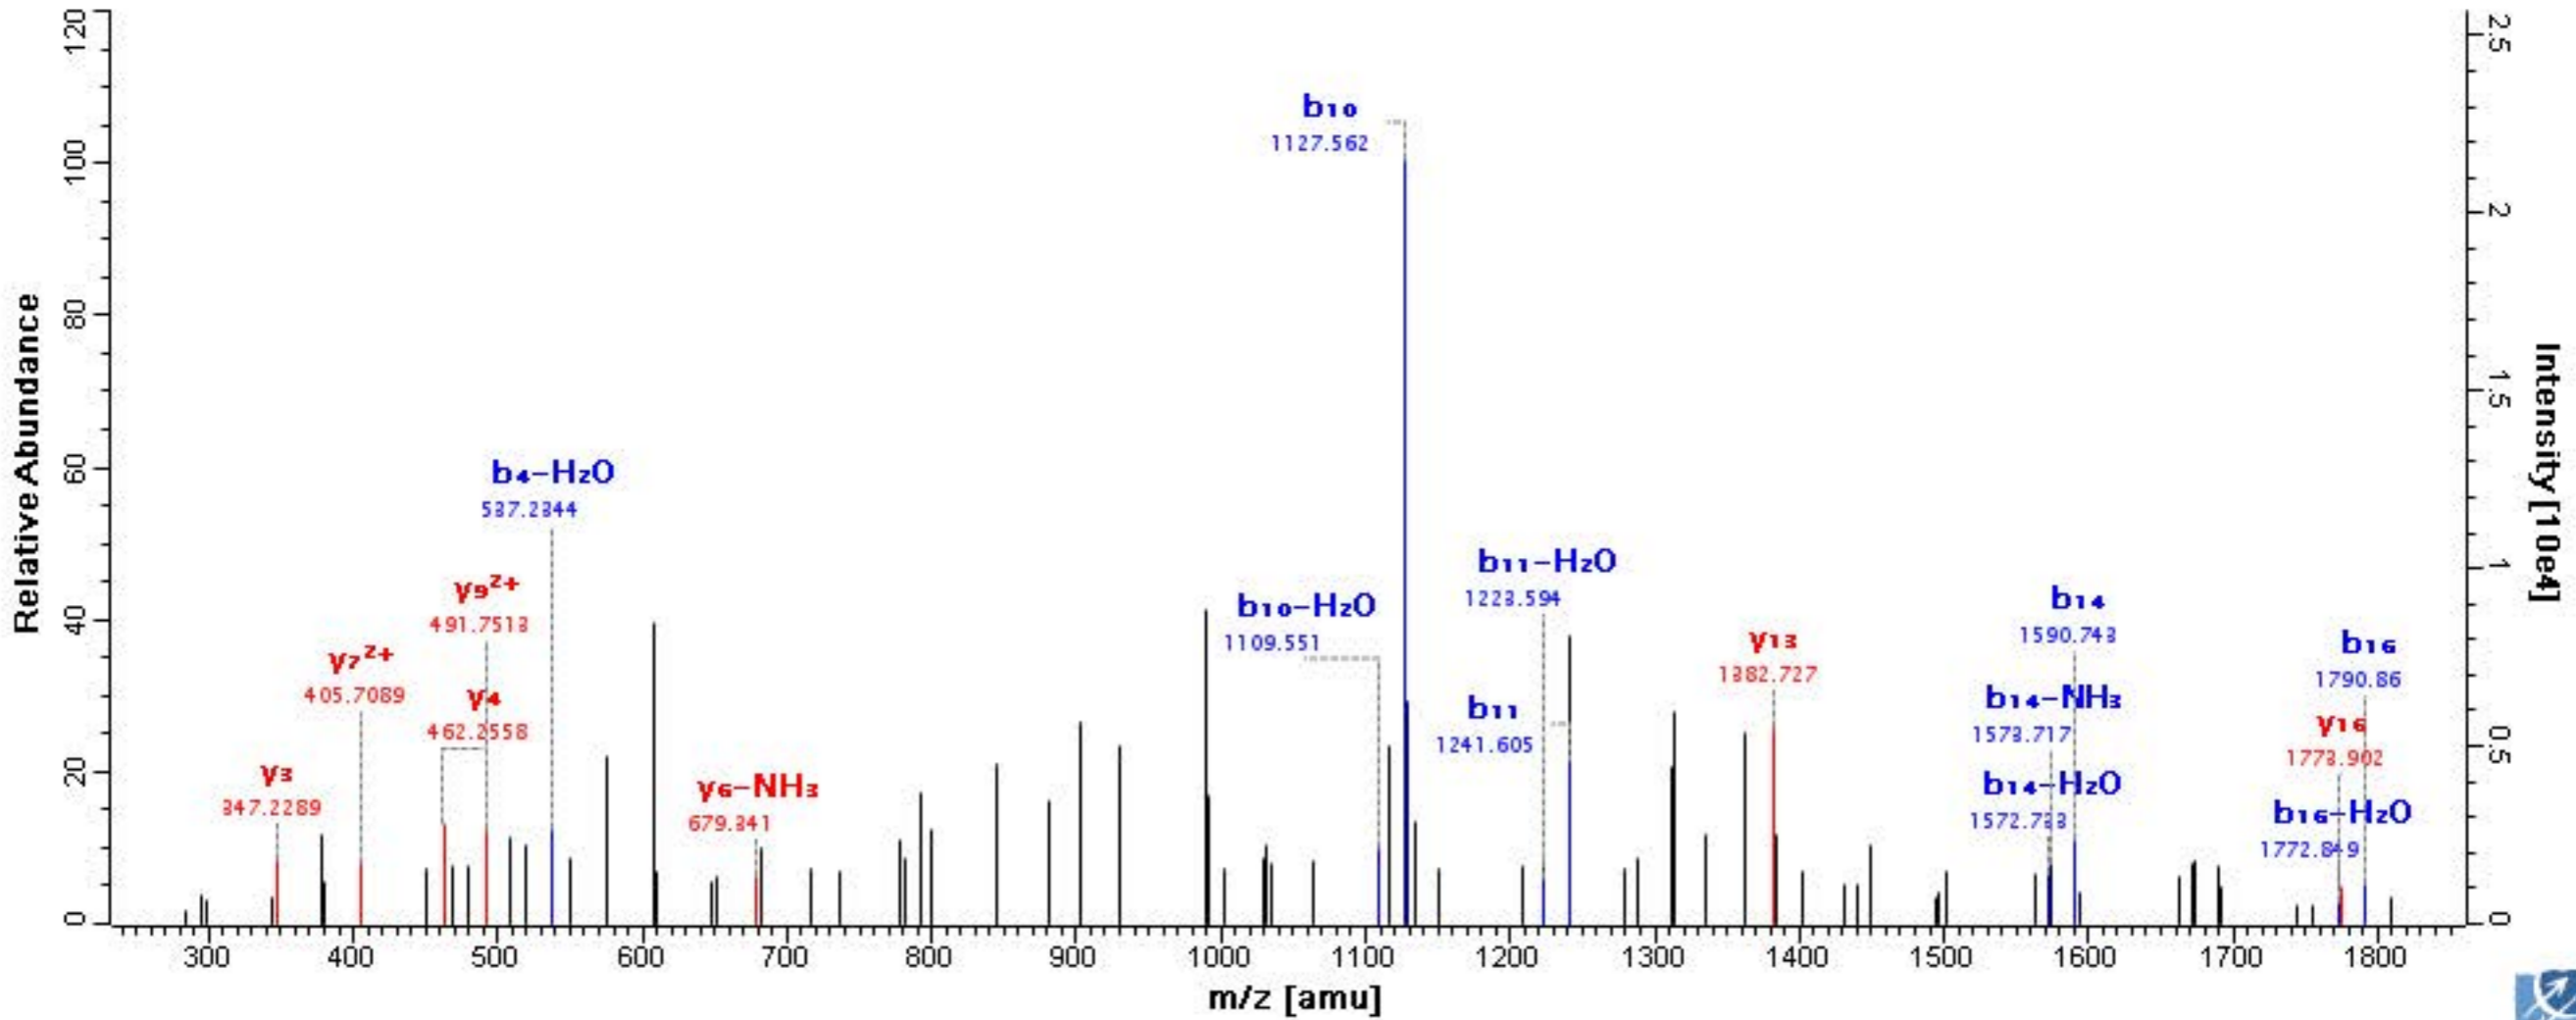

precursor information

|                   |                     |
|-------------------|---------------------|
| Mass:             | 1935.95558          |
| m/z:              | System.Collections. |
| Charge:           | System.Collections. |
| Retentiontime:    | System.Collections. |
| Score:            | 62.35712            |
| Mass Error [ppm]: | -1.1505             |
| PEP:              | 0.0010923           |
| Precursor Type:   | MULTI               |

| b ion      |              |    |     |    | y ion        |            | y <sup>2+</sup> ion |            |
|------------|--------------|----|-----|----|--------------|------------|---------------------|------------|
| Δ dalton   | mass         |    | seq |    | Δ dalton     | mass       | Δ dalton            | mass       |
|            | 164.070605   | 1  | Y   | 16 |              |            |                     |            |
|            | 293.1131981  | 2  | E   | 15 | 1773.9017553 | +0.1251001 | 1773.9017553        |            |
|            | 392.18161202 | 3  | V   | 14 | 1644.8591623 |            | 1644.8591623        |            |
|            | 555.24494056 | 4  | Y   | 13 | 1545.7907483 |            | 1545.7907483        |            |
|            | 654.31335447 | 5  | V   | 12 | 1382.7274198 | +0.100339  | 1382.7274198        |            |
|            | 753.38176839 | 6  | V   | 11 | 1283.6590059 |            | 1283.6590059        |            |
|            | 854.42944686 | 7  | T   | 10 | 1184.590592  |            | 1184.590592         |            |
|            | 955.47712534 | 8  | T   | 9  | 1083.5429135 |            | 1083.5429135        |            |
|            | 1026.5142391 | 9  | A   | 8  | 982.49523502 |            | 491.75125574        | -0.4125717 |
| -0.0425084 | 1127.5619176 | 10 | T   | 7  | 911.45812123 |            | 911.45812123        |            |
| -0.1183948 | 1241.604845  | 11 | N   | 6  | 810.41044275 |            | 405.70885961        | +0.3287686 |
|            | 1378.6637569 | 12 | H   | 5  | 696.36751531 |            | 696.36751531        |            |
|            | 1475.7165208 | 13 | P   | 4  | 559.30860344 |            | 559.30860344        |            |
| +0.4413507 | 1590.7434638 | 14 | D   | 3  | 462.25583959 | +0.0790298 | 462.25583959        |            |
|            | 1677.7754922 | 15 | S   | 2  | 347.22889656 | -0.003158  | 347.22889656        |            |
| -0.1296978 | 1790.8595562 | 16 | I   | 1  | 260.19686815 |            | 260.19686815        |            |
|            |              | 17 | K   | 0  | 147.11280417 |            | 147.11280417        |            |

general information

|                       |           |
|-----------------------|-----------|
| Annotation:           | 10 of 17  |
| AminoAcids Coverag    | 59 %      |
| Intensity Coverage:   | 25 %      |
| Protein Localisation: | 81 ... 97 |

Source: 20130124\_VR\_Bsu\_TripleSILAC\_WTPPrkCPrpCReplicate2\_OG\_F05  
 Scannumber: 20168  
 Protein: BSU06370; pbuG; yebB  
 Peptide Score: 89.25  
 Method: ITMS; CID; 3

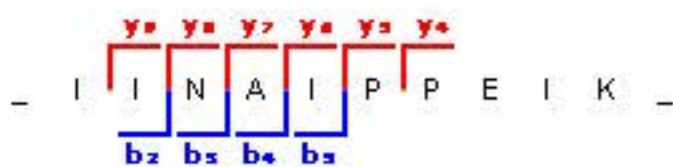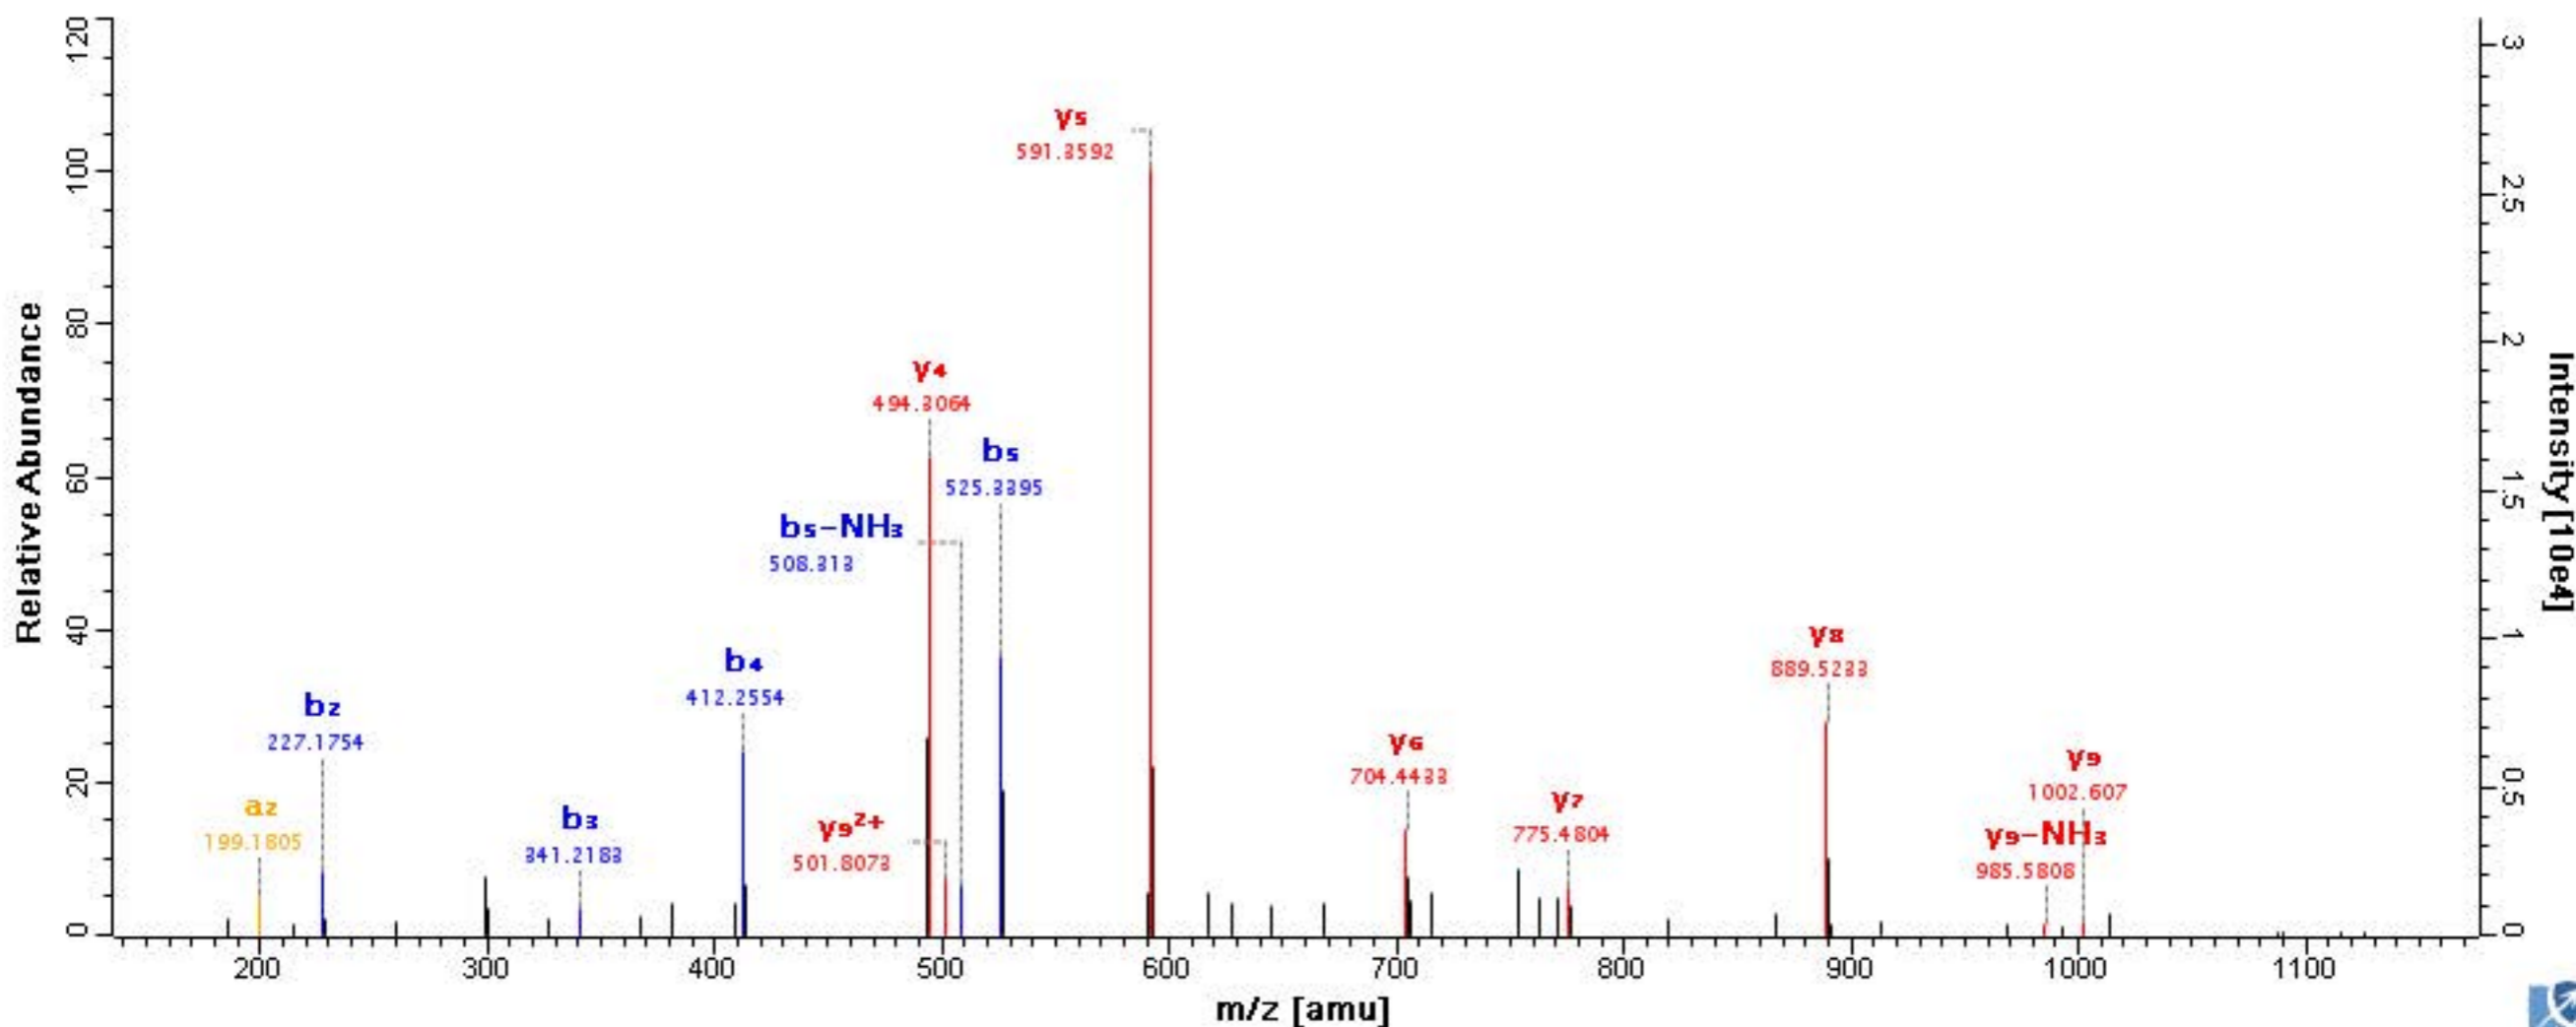

**precursor information**

|                   |                     |
|-------------------|---------------------|
| Mass:             | 1106.67016          |
| m/z:              | System.Collections. |
| Charge:           | System.Collections. |
| Retentiontime:    | System.Collections. |
| Score:            | 89.24719            |
| Mass Error [ppm]: | 0.19507             |
| PEP:              | 0.0021603           |
| Precursor Type:   | MULTI               |

**general information**

|                       |             |
|-----------------------|-------------|
| Annotation:           | 6 of 10     |
| AminoAcids Coverage:  | 60 %        |
| Intensity Coverage:   | 61 %        |
| Protein Localisation: | 131 ... 140 |

| a ion     |          | b ion     |          |     | y ion |          | y <sup>2+</sup> ion |           |          |           |
|-----------|----------|-----------|----------|-----|-------|----------|---------------------|-----------|----------|-----------|
| Δ dalton  | mass     | Δ dalton  | mass     | seq |       | Δ dalton | mass                | Δ dalton  | mass     |           |
|           | 86.09643 |           | 114.0913 | 1   | I     | 9        |                     |           |          |           |
| +0.003394 | 199.1805 | -0.130284 | 227.1754 | 2   | I     | 8        | 1002.607            | +0.006291 | 501.8073 | +0.022578 |
|           | 313.2234 | -0.05134  | 341.2183 | 3   | N     | 7        | 889.5233            | -0.11332  | 889.5233 |           |
|           | 384.2605 | -0.048475 | 412.2554 | 4   | A     | 6        | 775.4804            | -0.039081 | 775.4804 |           |
|           | 497.3446 | -0.077181 | 525.3395 | 5   | I     | 5        | 704.4433            | -0.075515 | 704.4433 |           |
|           | 594.3974 |           | 622.3923 | 6   | P     | 4        | 591.3592            | -0.053585 | 591.3592 |           |
|           | 691.4501 |           | 719.445  | 7   | P     | 3        | 494.3064            | +0.355502 | 494.3064 |           |
|           | 820.4927 |           | 848.4876 | 8   | E     | 2        | 397.2537            |           | 397.2537 |           |
|           | 933.5768 |           | 961.5717 | 9   | I     | 1        | 268.2111            |           | 268.2111 |           |
|           |          |           |          | 10  | K     | 0        | 155.127             |           | 155.127  |           |

Source: 20130127\_VR\_Bsu\_TripleSILAC\_WTPPrkCPrpCReplicate2\_GeLC\_F01  
 Scannumber: 19806  
 Protein: BSU09460; yhdG  
 Peptide Score: 220.31  
 Method: ITMS; CID; 3

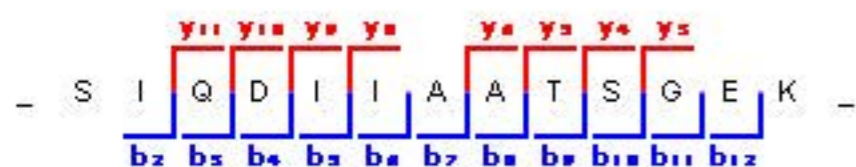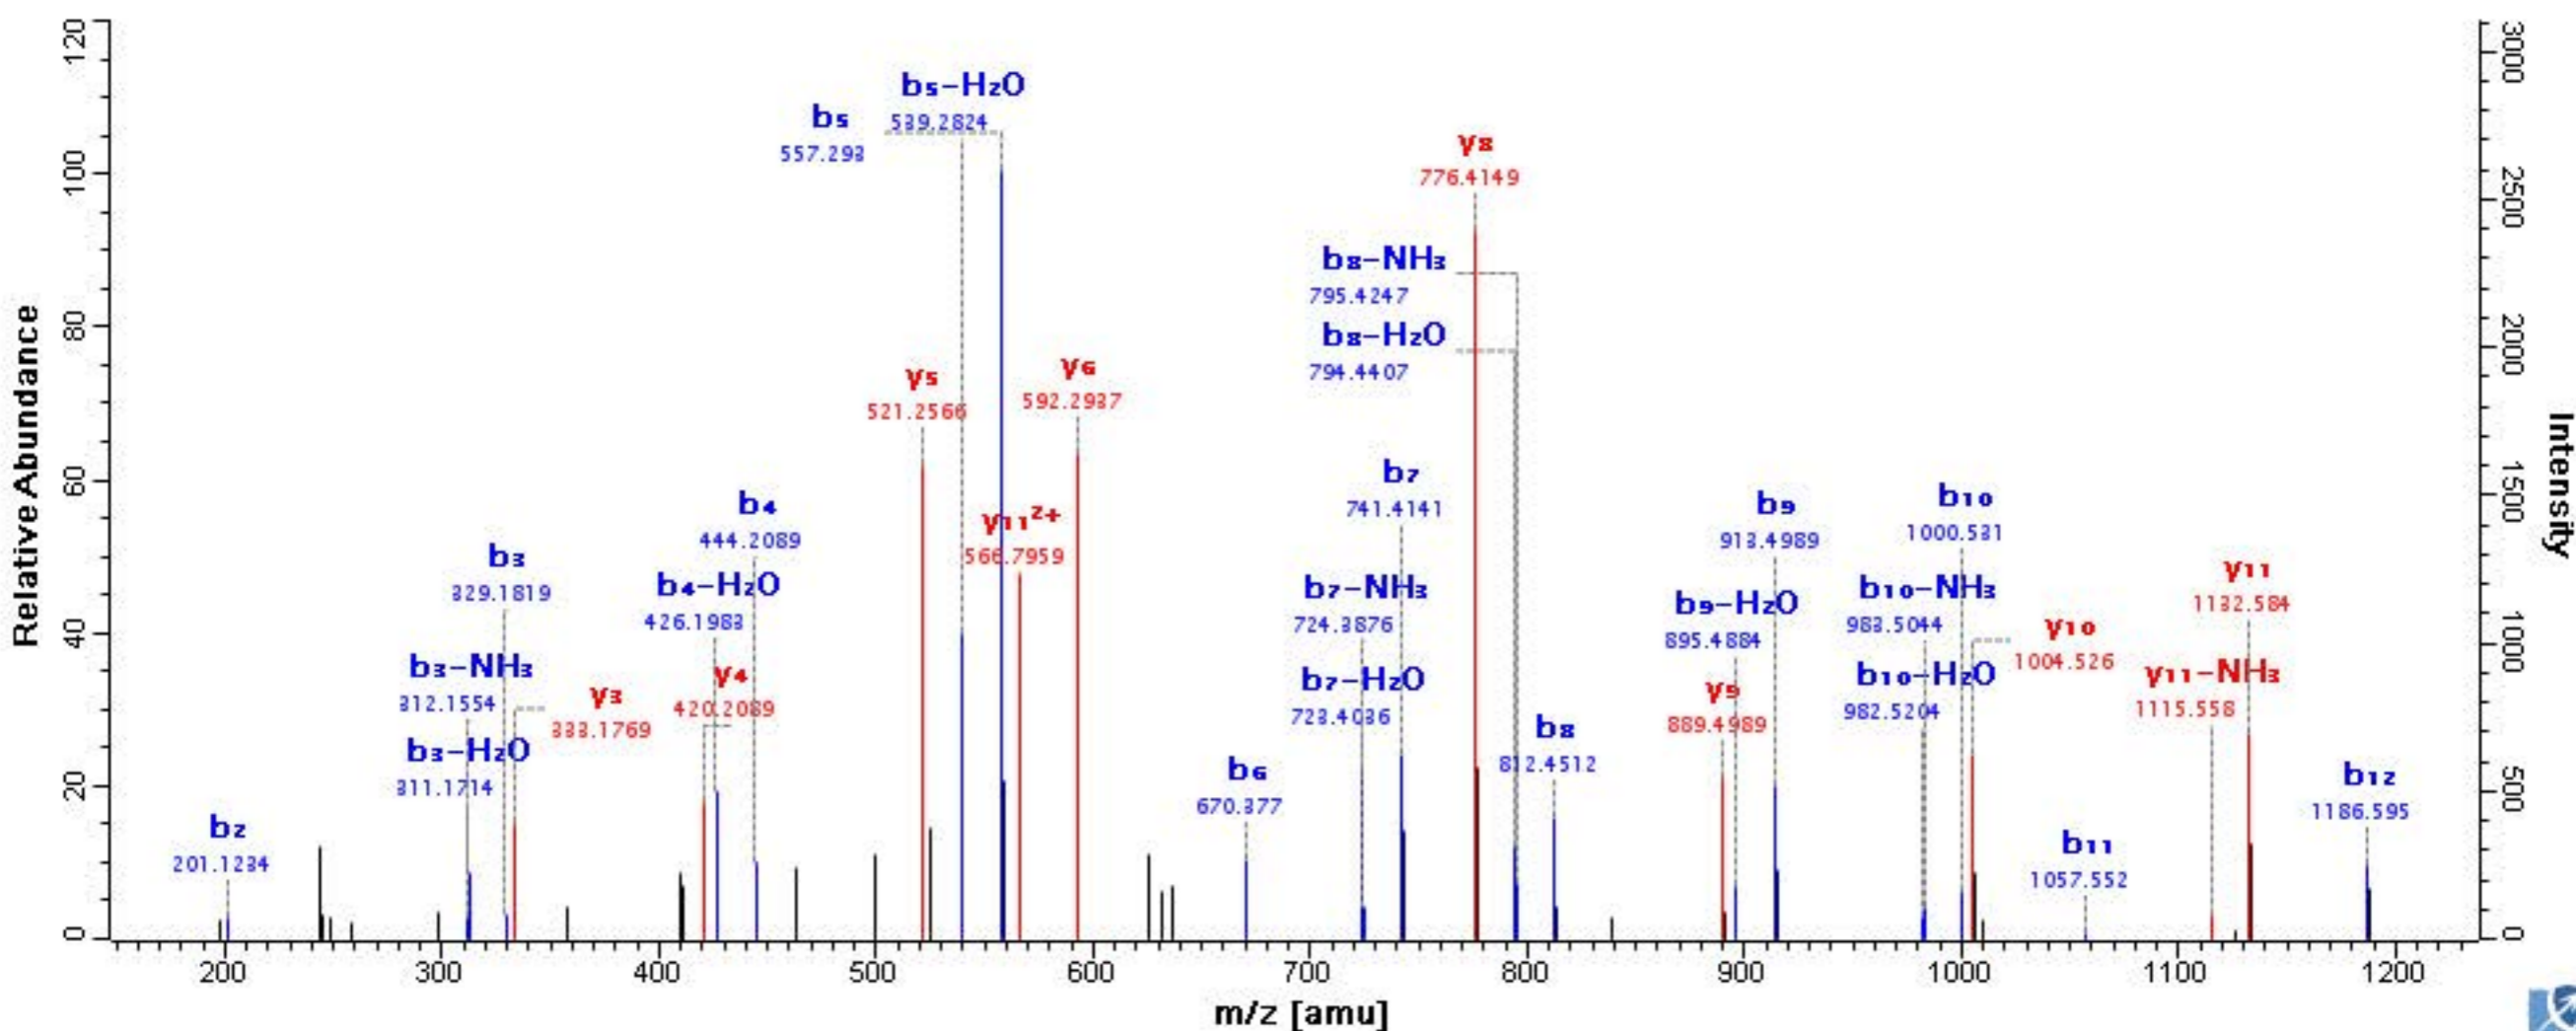

#### precursor information

|                   |                     |
|-------------------|---------------------|
| Mass:             | 1331.69375          |
| m/z:              | System.Collections. |
| Charge:           | System.Collections. |
| Retentiontime:    | System.Collections. |
| Score:            | 220.3108            |
| Mass Error [ppm]: | 0.36613             |
| PEP:              | 7.9222E-120         |
| Precursor Type:   | MULTI               |

#### general information

|                       |           |
|-----------------------|-----------|
| Annotation:           | 11 of 13  |
| AminoAcids Coverag    | 85 %      |
| Intensity Coverage:   | 77 %      |
| Protein Localisation: | 10 ... 22 |

| b ion      |              |    |     |    | γ ion        |            | γ <sup>2+</sup> ion |            |
|------------|--------------|----|-----|----|--------------|------------|---------------------|------------|
| Δ dalton   | mass         |    | seq |    | Δ dalton     | mass       | Δ dalton            | mass       |
|            | 88.039304876 | 1  | S   | 12 |              |            |                     |            |
| +0.0027756 | 201.12336886 | 2  | I   | 11 | 1245.6685079 |            | 1245.6685079        |            |
| +0.2147516 | 329.18194637 | 3  | Q   | 10 | 1132.584444  | +0.0621625 | 566.79586021        | -0.0204086 |
| +0.2821995 | 444.2088894  | 4  | D   | 9  | 1004.5258664 | +0.2089968 | 1004.5258664        |            |
| +0.3298494 | 557.29295338 | 5  | I   | 8  | 889.49892341 | +0.2629784 | 889.49892341        |            |
| +0.0687224 | 670.37701736 | 6  | I   | 7  | 776.41485943 | +0.0231899 | 776.41485943        |            |
| +0.0379563 | 741.41413115 | 7  | A   | 6  | 663.33079545 |            | 663.33079545        |            |
| +0.1940187 | 812.45124494 | 8  | A   | 5  | 592.29368166 | +0.0213818 | 592.29368166        |            |
| +0.2369164 | 913.49892341 | 9  | T   | 4  | 521.25656787 | +0.0225459 | 521.25656787        |            |
| -0.0008005 | 1000.5309518 | 10 | S   | 3  | 420.2088894  | +0.1756321 | 420.2088894         |            |
| +0.1417983 | 1057.5524155 | 11 | G   | 2  | 333.17686099 | +0.147846  | 333.17686099        |            |
| +0.1620714 | 1186.5950086 | 12 | E   | 1  | 276.15539727 |            | 276.15539727        |            |
|            |              | 13 | K   | 0  | 147.11280417 |            | 147.11280417        |            |

Source: 20130127\_VR\_Bsu\_TripleSILAC\_WTPPrkCPrpCReplicate2\_GeLC\_F14  
 Scannumber: 27794  
 Protein: BSU37640; ipa-90d; ywfl  
 Peptide Score: 88.08  
 Method: ITMS; CID; 3

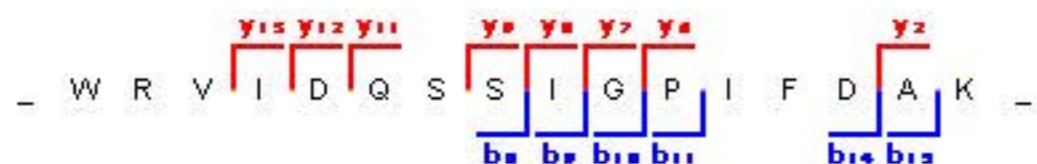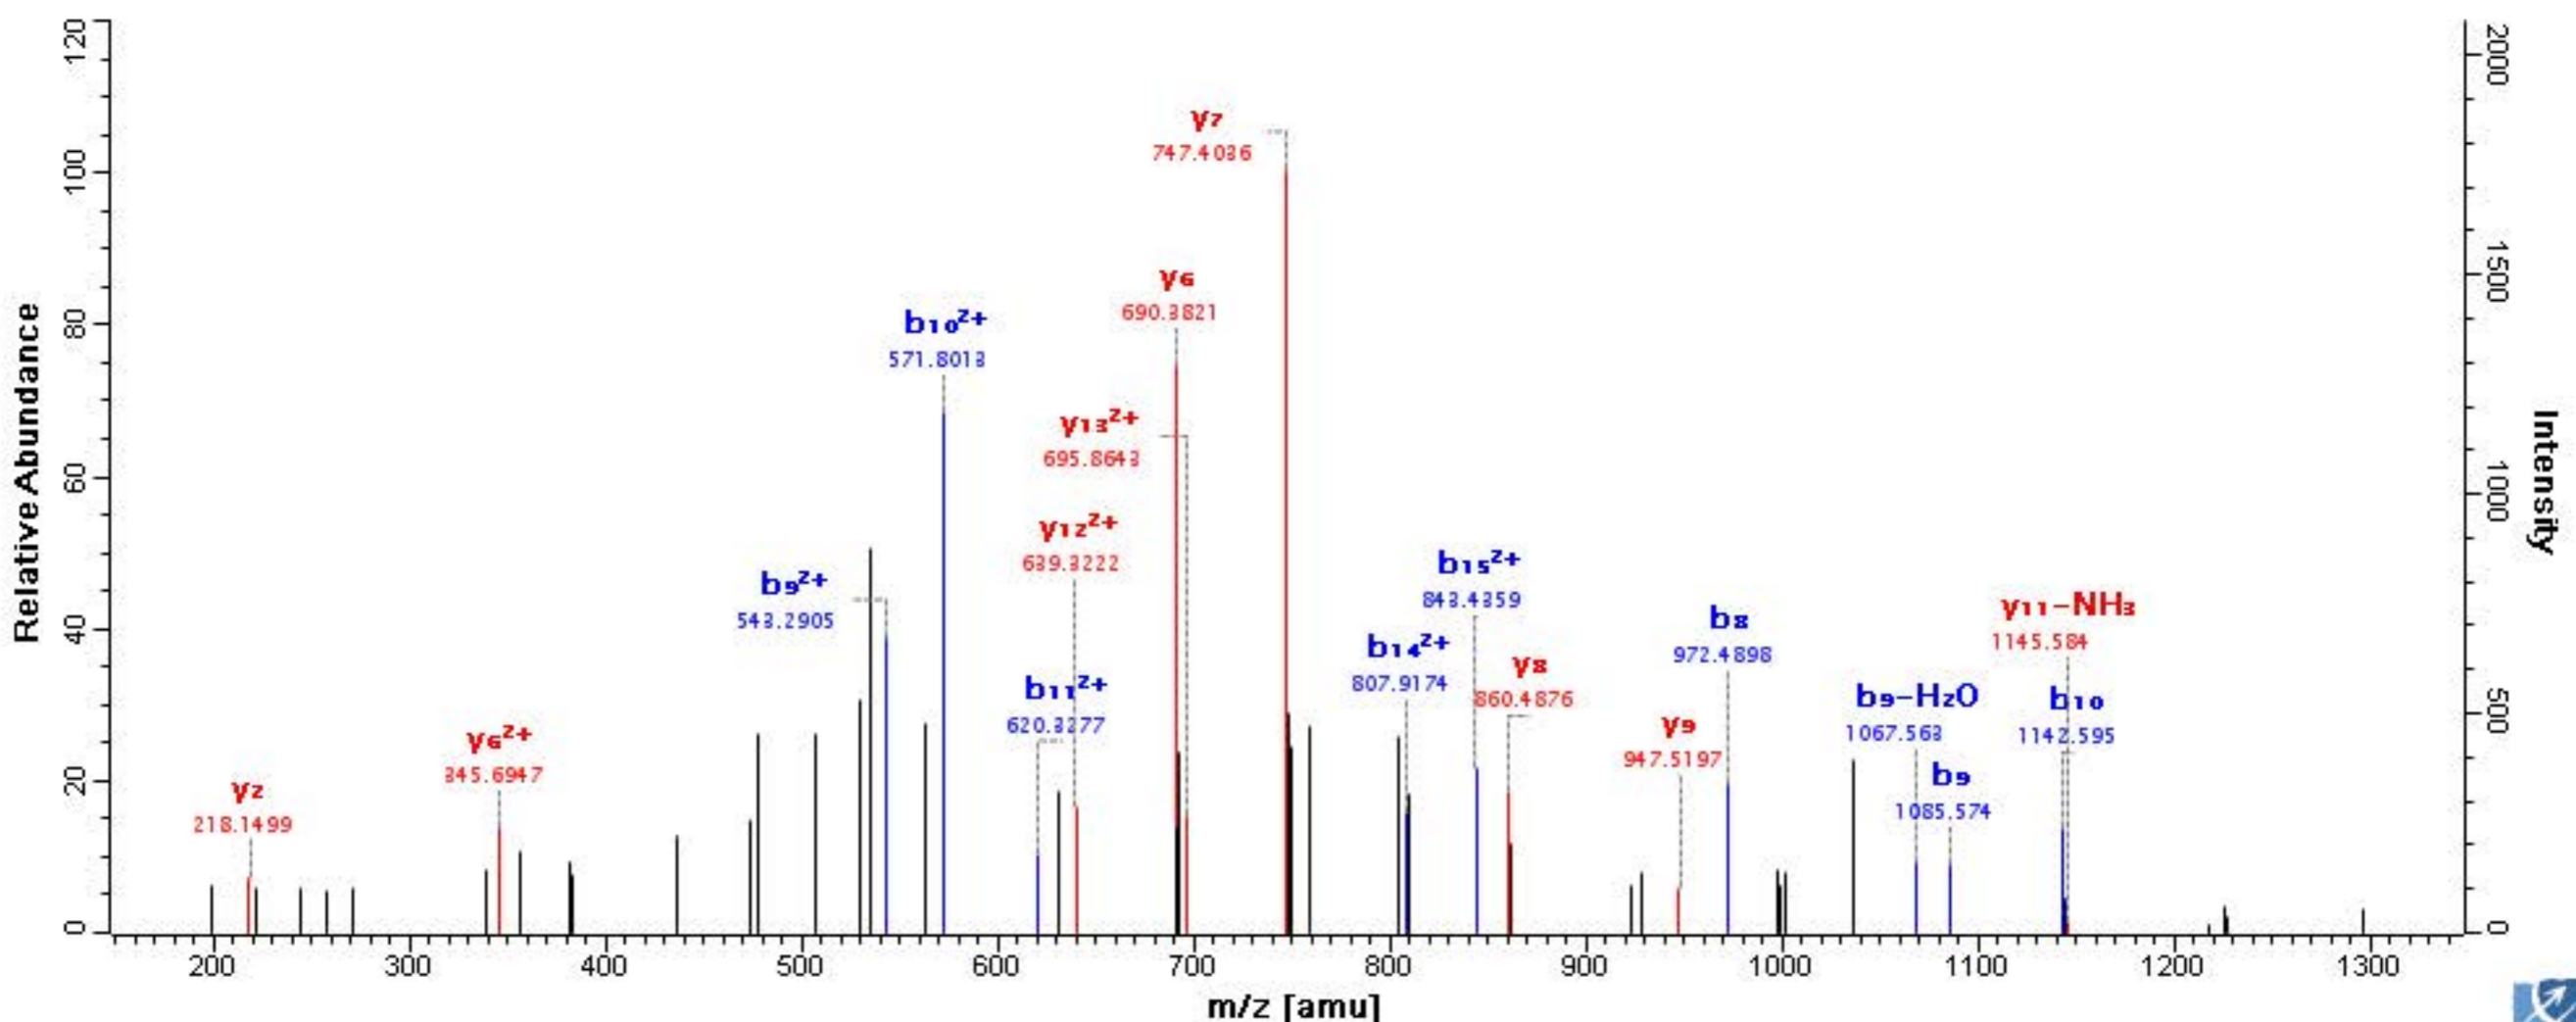

#### precursor information

|                   |                     |
|-------------------|---------------------|
| Mass:             | 1830.96248          |
| m/z:              | System.Collections. |
| Charge:           | System.Collections. |
| Retentiontime:    | System.Collections. |
| Score:            | 88.07503            |
| Mass Error [ppm]: | -0.19399            |
| PEP:              | 0.0011347           |
| Precursor Type:   | ISO                 |

| b <sup>2+</sup> ion |          | b ion           |          |     | y ion |                 | y <sup>2+</sup> ion |                 |          |           |
|---------------------|----------|-----------------|----------|-----|-------|-----------------|---------------------|-----------------|----------|-----------|
| $\Delta$ dalton     | mass     | $\Delta$ dalton | mass     | seq |       | $\Delta$ dalton | mass                | $\Delta$ dalton | mass     |           |
|                     | 187.0866 |                 | 187.0866 | 1   | W     | 15              |                     |                 |          |           |
|                     | 343.1877 |                 | 343.1877 | 2   | R     | 14              | 1645.891            |                 | 1645.891 |           |
|                     | 442.2561 |                 | 442.2561 | 3   | V     | 13              | 1489.79             |                 | 1489.79  |           |
|                     | 555.3402 |                 | 555.3402 | 4   | I     | 12              | 1390.721            |                 | 695.8643 | -0.276384 |
|                     | 670.3671 |                 | 670.3671 | 5   | D     | 11              | 1277.637            |                 | 639.3222 | +0.339745 |
|                     | 798.4257 |                 | 798.4257 | 6   | Q     | 10              | 1162.61             |                 | 1162.61  |           |
|                     | 885.4577 |                 | 885.4577 | 7   | S     | 9               | 1034.552            |                 | 1034.552 |           |
|                     | 972.4898 | +0.191824       | 972.4898 | 8   | S     | 8               | 947.5197            | -0.205694       | 947.5197 |           |
| -0.00173            | 543.2905 | +0.054354       | 1085.574 | 9   | I     | 7               | 860.4876            | -0.01534        | 860.4876 |           |
| +0.340322           | 571.8013 | +0.122734       | 1142.595 | 10  | G     | 6               | 747.4036            | -0.076662       | 747.4036 |           |
| +0.155553           | 620.3277 |                 | 1239.648 | 11  | P     | 5               | 690.3821            | -0.080772       | 345.6947 | -0.082751 |
|                     | 1352.732 |                 | 1352.732 | 12  | I     | 4               | 593.3293            |                 | 593.3293 |           |
|                     | 1499.801 |                 | 1499.801 | 13  | F     | 3               | 480.2453            |                 | 480.2453 |           |
| -0.013381           | 807.9174 |                 | 1614.827 | 14  | D     | 2               | 333.1769            |                 | 333.1769 |           |
| +0.301314           | 843.4359 |                 | 1685.865 | 15  | A     | 1               | 218.1499            | -0.009461       | 218.1499 |           |
|                     |          |                 |          | 16  | K     | 0               | 147.1128            |                 | 147.1128 |           |

#### general information

|                       |           |
|-----------------------|-----------|
| Annotation:           | 9 of 16   |
| AminoAcids Coverag    | 56 %      |
| Intensity Coverage:   | 46 %      |
| Protein Localisation: | 14 ... 29 |

Source: 20130127\_VR\_Bsu\_TripleSILAC\_WTPPrkCPrpCReplicate2\_GeLC\_F15  
 Scannumber: 11770  
 Protein: BSU31110; yubF  
 Peptide Score: 122.33  
 Method: ITMS; CID; 3

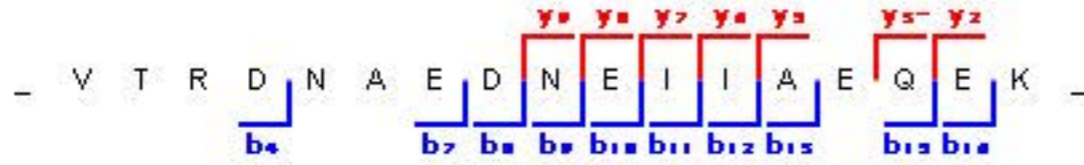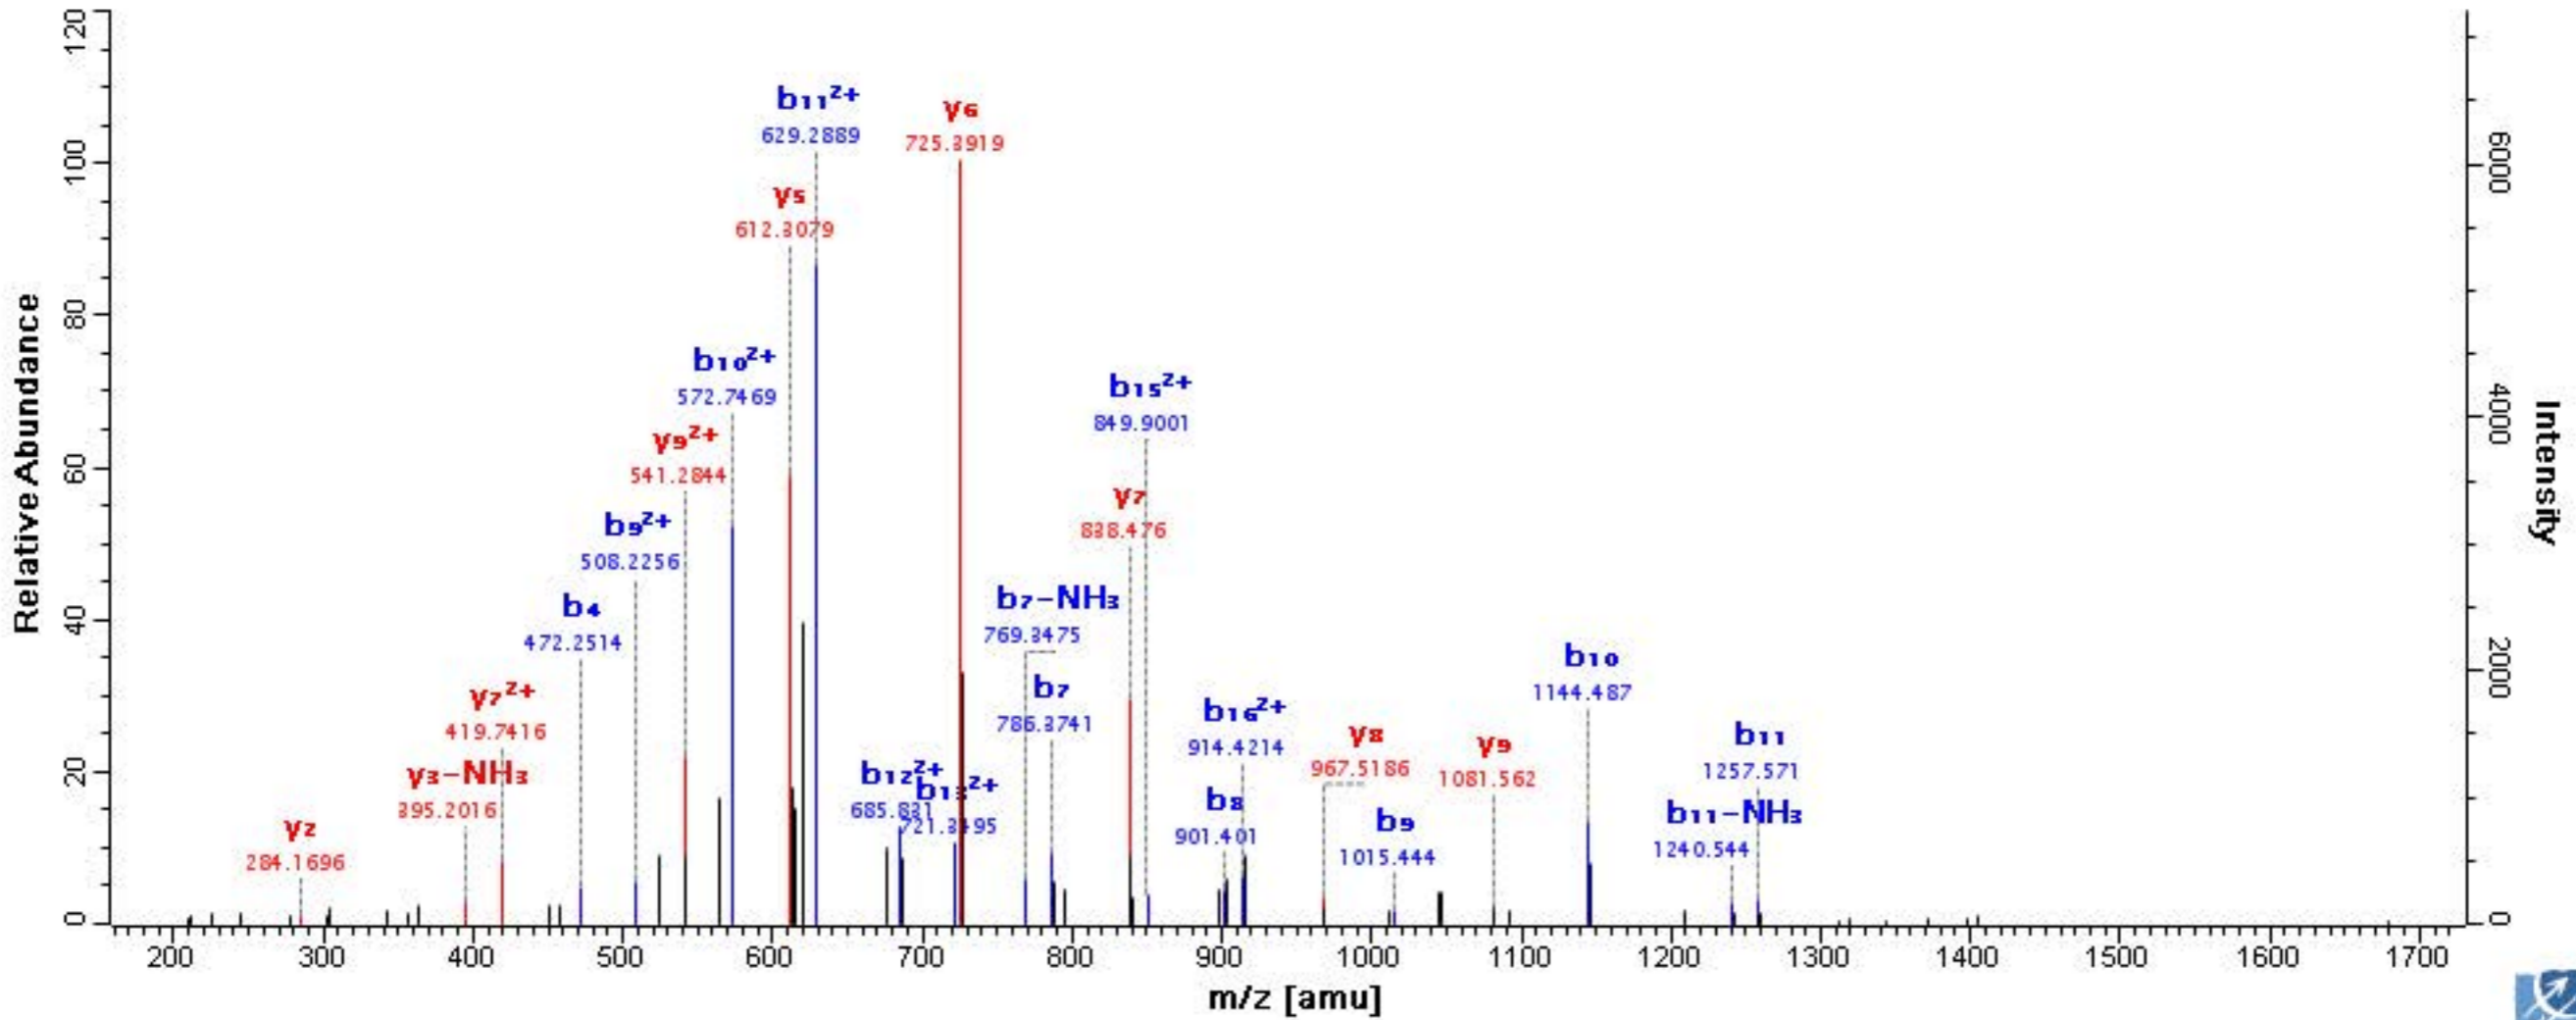

#### precursor information

|                   |                     |
|-------------------|---------------------|
| Mass:             | 1972.93351          |
| m/z:              | System.Collections. |
| Charge:           | System.Collections. |
| Retentiontime:    | System.Collections. |
| Score:            | 122.327             |
| Mass Error [ppm]: | -0.13313            |
| PEP:              | 4.2807E-20          |
| Precursor Type:   | MULTI               |

| b <sup>2+</sup> ion |          | b ion     |          | seq |   |    | y ion    |           | y <sup>2+</sup> ion |           |
|---------------------|----------|-----------|----------|-----|---|----|----------|-----------|---------------------|-----------|
| Δ dalton            | mass     | Δ dalton  | mass     |     |   |    | Δ dalton | mass      | Δ dalton            | mass      |
|                     | 100.0757 |           | 100.0757 | 1   | V | 16 |          |           |                     |           |
|                     | 201.1234 |           | 201.1234 | 2   | T | 15 | 1882.887 |           | 1882.887            |           |
|                     | 357.2245 |           | 357.2245 | 3   | R | 14 | 1781.839 |           | 1781.839            |           |
|                     | 472.2514 | -0.070087 | 472.2514 | 4   | D | 13 | 1625.738 |           | 1625.738            |           |
|                     | 586.2944 |           | 586.2944 | 5   | N | 12 | 1510.711 |           | 1510.711            |           |
|                     | 657.3315 |           | 657.3315 | 6   | A | 11 | 1396.668 |           | 1396.668            |           |
|                     | 786.3741 | +0.094021 | 786.3741 | 7   | E | 10 | 1325.631 |           | 1325.631            |           |
|                     | 901.401  | +0.084901 | 901.401  | 8   | D | 9  | 1196.588 |           | 1196.588            |           |
| -0.002946           | 508.2256 | +0.031902 | 1015.444 | 9   | N | 8  | 1081.562 | +0.016108 | 541.2844            | +0.012289 |
| +0.321766           | 572.7469 | +0.047903 | 1144.487 | 10  | E | 7  | 967.5186 | +0.052443 | 967.5186            |           |
| +0.43104            | 629.2889 | +0.06235  | 1257.571 | 11  | I | 6  | 838.476  | +0.069707 | 419.7416            | -0.037999 |
| -0.016387           | 685.831  |           | 1370.655 | 12  | I | 5  | 725.3919 | +0.062035 | 725.3919            |           |
| +0.11801            | 721.3495 |           | 1441.692 | 13  | A | 4  | 612.3079 | +0.047649 | 612.3079            |           |
|                     | 1570.734 |           | 1570.734 | 14  | E | 3  | 541.2708 |           | 541.2708            |           |
| +0.427227           | 849.9001 |           | 1698.793 | 15  | Q | 2  | 412.2282 |           | 412.2282            |           |
| -0.051284           | 914.4214 |           | 1827.836 | 16  | E | 1  | 284.1696 | +0.292013 | 284.1696            |           |
|                     |          |           |          | 17  | K | 0  | 155.127  |           | 155.127             |           |

#### general information

|                       |           |
|-----------------------|-----------|
| Annotation:           | 11 of 17  |
| AminoAcids Coverag    | 65 %      |
| Intensity Coverage:   | 63 %      |
| Protein Localisation: | 62 ... 78 |

Source: 20130127\_VR\_Bsu\_TripleSILAC\_WTPPrkCPrpCReplicate2\_GeLC\_F15  
 Scannumber: 17312  
 Protein: BSU05070; yddQ  
 Peptide Score: 70.44  
 Method: ITMS; CID; 3

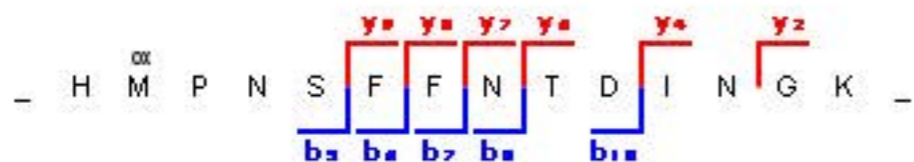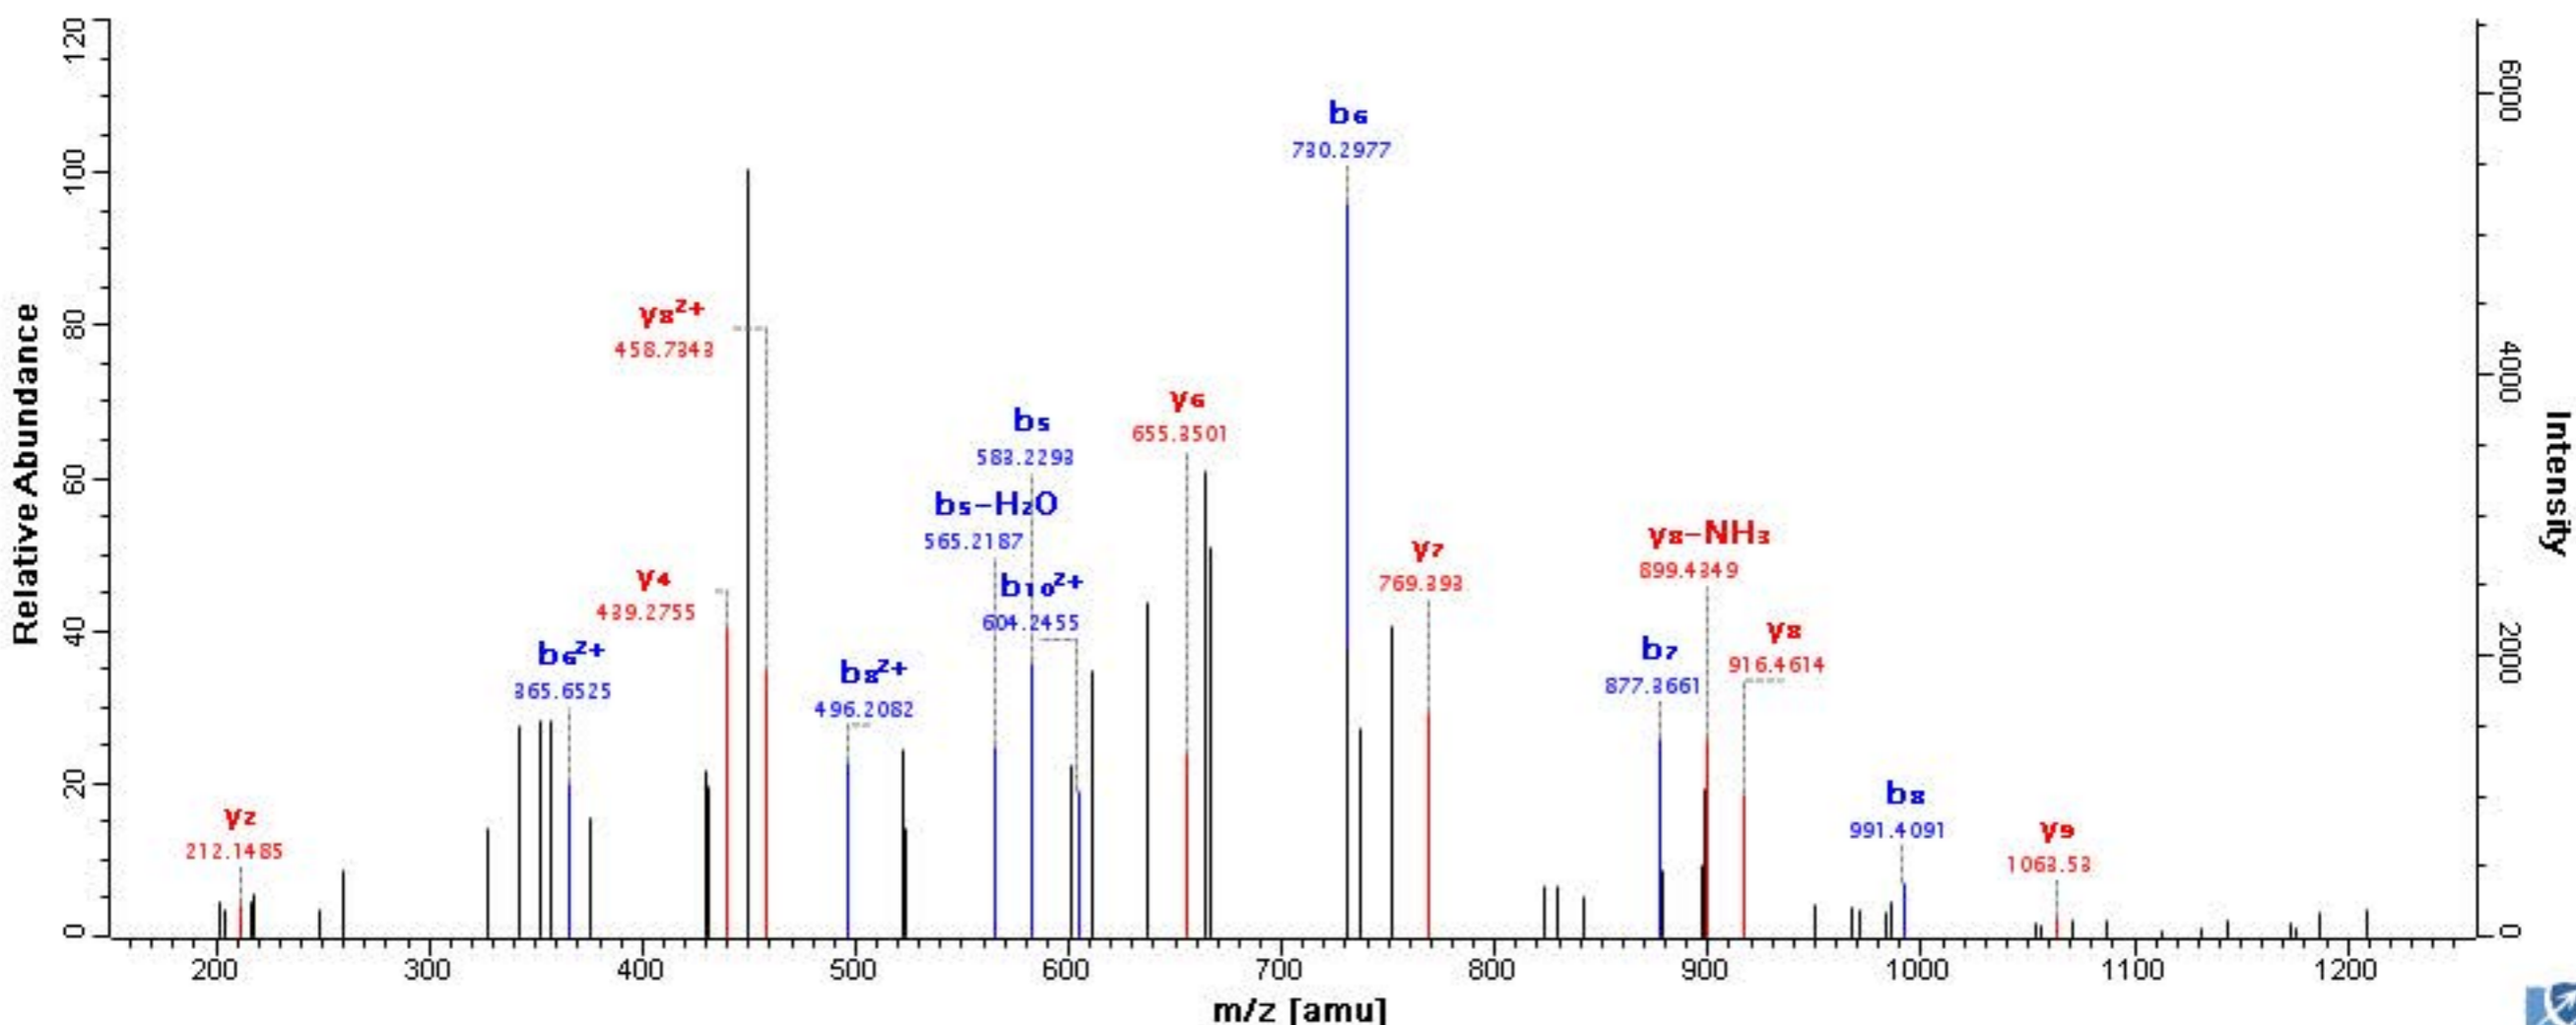

#### precursor information

|                   |                     |
|-------------------|---------------------|
| Mass:             | 1636.73003          |
| m/z:              | System.Collections. |
| Charge:           | System.Collections. |
| Retentiontime:    | System.Collections. |
| Score:            | 70.43787            |
| Mass Error [ppm]: | -0.21884            |
| PEP:              | 0.00139             |
| Precursor Type:   | MULTI               |

| b <sup>2+</sup> ion |          | b ion     |          |    |     |    | y ion    |           | y <sup>2+</sup> ion |           |
|---------------------|----------|-----------|----------|----|-----|----|----------|-----------|---------------------|-----------|
| Δ dalton            | mass     | Δ dalton  | mass     |    | seq |    | Δ dalton | mass      | Δ dalton            | mass      |
|                     | 138.0662 |           | 138.0662 | 1  | H   | 13 |          |           |                     |           |
|                     | 285.1016 |           | 285.1016 | 2  | M   | 12 | 1508.693 |           | 1508.693            |           |
|                     | 382.1544 |           | 382.1544 | 3  | P   | 11 | 1361.658 |           | 1361.658            |           |
|                     | 496.1973 |           | 496.1973 | 4  | N   | 10 | 1264.605 |           | 1264.605            |           |
|                     | 583.2293 | -0.025084 | 583.2293 | 5  | S   | 9  | 1150.562 |           | 1150.562            |           |
| -0.021884           | 365.6525 | -0.043876 | 730.2977 | 6  | F   | 8  | 1063.53  | +0.07539  | 1063.53             |           |
|                     | 877.3661 | +0.05812  | 877.3661 | 7  | F   | 7  | 916.4614 | +0.17603  | 458.7343            | -0.110814 |
| +0.404684           | 496.2082 | +0.183589 | 991.4091 | 8  | N   | 6  | 769.393  | +0.003416 | 769.393             |           |
|                     | 1092.457 |           | 1092.457 | 9  | T   | 5  | 655.3501 | +0.006244 | 655.3501            |           |
| +0.034305           | 604.2455 |           | 1207.484 | 10 | D   | 4  | 554.3024 |           | 554.3024            |           |
|                     | 1320.568 |           | 1320.568 | 11 | I   | 3  | 439.2755 | +0.083856 | 439.2755            |           |
|                     | 1434.611 |           | 1434.611 | 12 | N   | 2  | 326.1914 |           | 326.1914            |           |
|                     | 1491.632 |           | 1491.632 | 13 | G   | 1  | 212.1485 | +0.024904 | 212.1485            |           |
|                     |          |           |          | 14 | K   | 0  | 155.127  |           | 155.127             |           |

#### general information

|                       |           |
|-----------------------|-----------|
| Annotation:           | 9 of 14   |
| AminoAcids Coverag    | 64%       |
| Intensity Coverage:   | 37%       |
| Protein Localisation: | 86 ... 99 |

Source: 20130127\_VR\_Bsu\_TripleSILAC\_WTPkCPrpCReplicate2\_GeLC\_F15  
 Scannumber: 25850  
 Protein: BSU33630; secG; yvaL  
 Peptide Score: 176.33  
 Method: ITMS; CID; 3

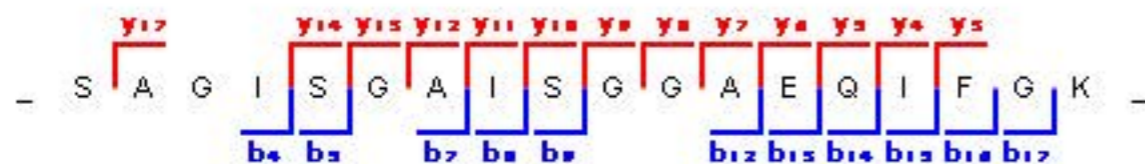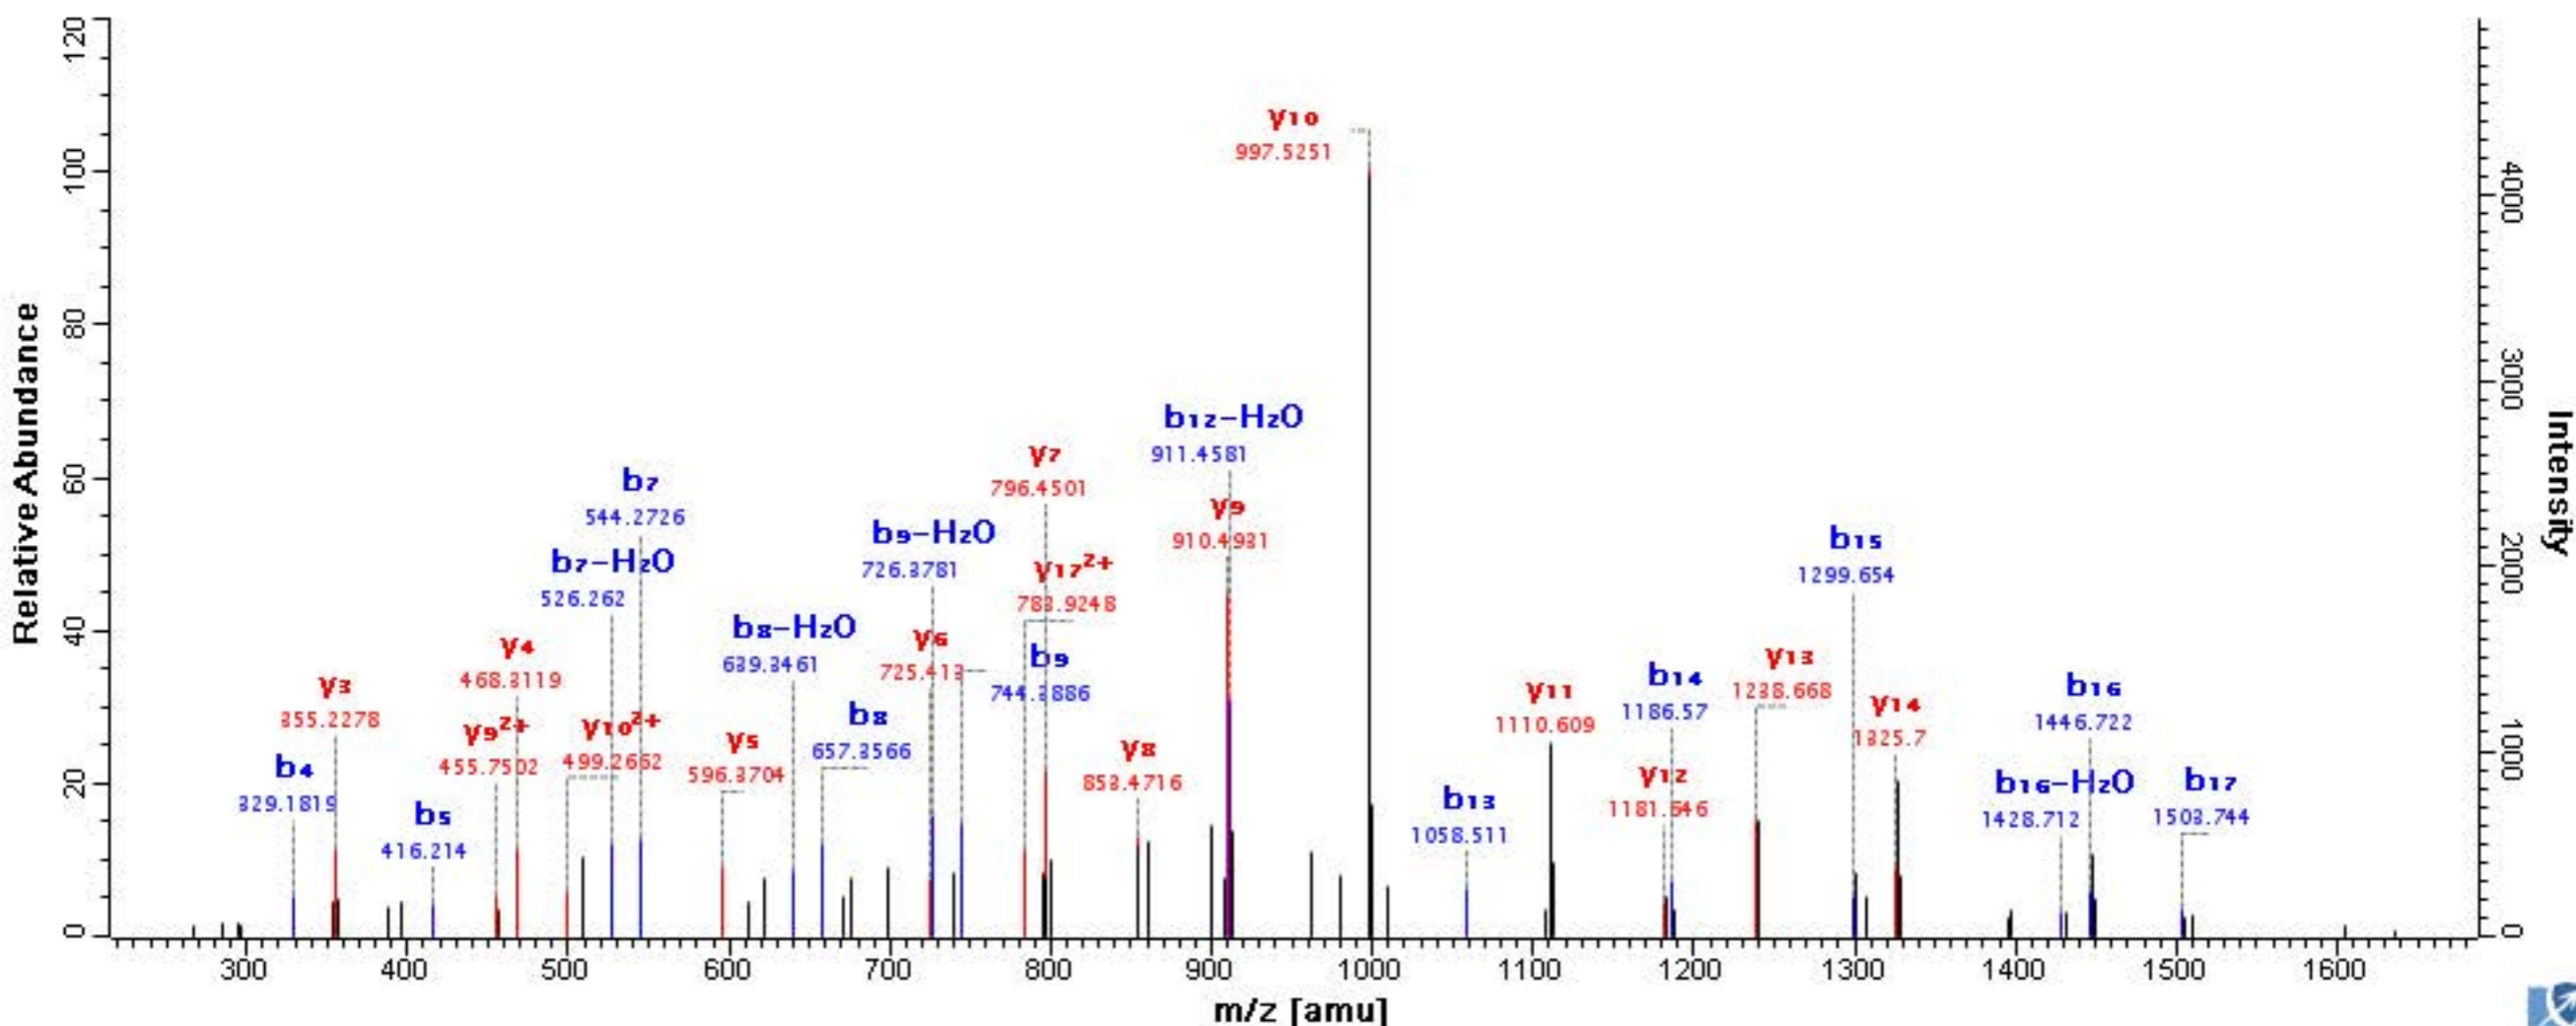

#### precursor information

|                   |                     |
|-------------------|---------------------|
| Mass:             | 1648.84234          |
| m/z:              | System.Collections. |
| Charge:           | System.Collections. |
| Retentiontime:    | System.Collections. |
| Score:            | 176.3325            |
| Mass Error [ppm]: | 0.17283             |
| PEP:              | 1.4924E-79          |
| Precursor Type:   | MULTI               |

#### general information

|                       |           |
|-----------------------|-----------|
| Annotation:           | 15 of 18  |
| AminoAcids Coverag    | 83 %      |
| Intensity Coverage:   | 49 %      |
| Protein Localisation: | 27 ... 44 |

| b ion      |              | seq |   |    | gamma ion    |            | gamma <sup>2+</sup> ion |            |
|------------|--------------|-----|---|----|--------------|------------|-------------------------|------------|
| Δ dalton   | mass         |     |   |    | Δ dalton     | mass       | Δ dalton                | mass       |
|            | 88.039304876 | 1   | S | 17 |              |            |                         |            |
|            | 159.07641866 | 2   | A | 16 | 1566.8424044 |            | 783.92484044            | -0.1951652 |
|            | 216.09788239 | 3   | G | 15 | 1495.8052906 |            | 1495.8052906            |            |
| -0.0191961 | 329.18194637 | 4   | I | 14 | 1438.7838269 |            | 1438.7838269            |            |
| +0.0840904 | 416.21397478 | 5   | S | 13 | 1325.6997629 | +0.0980886 | 1325.6997629            |            |
|            | 473.2354385  | 6   | G | 12 | 1238.6677345 | -0.0044044 | 1238.6677345            |            |
| -0.0444639 | 544.27255229 | 7   | A | 11 | 1181.6462708 | -0.0169983 | 1181.6462708            |            |
| +0.0841186 | 657.35661627 | 8   | I | 10 | 1110.609157  | +0.0166975 | 1110.609157             |            |
| -0.0339084 | 744.38864468 | 9   | S | 9  | 997.52509303 | -0.0357131 | 499.26618475            | +0.1436663 |
|            | 801.4101084  | 10  | G | 8  | 910.49306462 | +0.0170062 | 455.75017054            | -0.4064816 |
|            | 858.43157213 | 11  | G | 7  | 853.47160089 | +0.0098444 | 853.47160089            |            |
|            | 929.46868591 | 12  | A | 6  | 796.45013717 | -0.014041  | 796.45013717            |            |
| -0.0814694 | 1058.511279  | 13  | E | 5  | 725.41302338 | +0.1115738 | 725.41302338            |            |
| -0.0278643 | 1186.5698565 | 14  | Q | 4  | 596.37043029 | +0.0557782 | 596.37043029            |            |
| -0.0397848 | 1299.6539205 | 15  | I | 3  | 468.31185277 | -0.015344  | 468.31185277            |            |
| -0.0325151 | 1446.7223344 | 16  | F | 2  | 355.22778879 | +0.028864  | 355.22778879            |            |
| +0.0230476 | 1503.7437981 | 17  | G | 1  | 208.15937488 |            | 208.15937488            |            |
|            |              | 18  | K | 0  | 151.13791115 |            | 151.13791115            |            |

Source: 20130127\_VR\_Bsu\_TripleSILAC\_WTPrkCPrpCReplicate2\_GeLC\_F16  
 Scannumber: 22657  
 Protein: BSU27380; yrzB  
 Peptide Score: 182.71  
 Method: ITMS; CID; 3

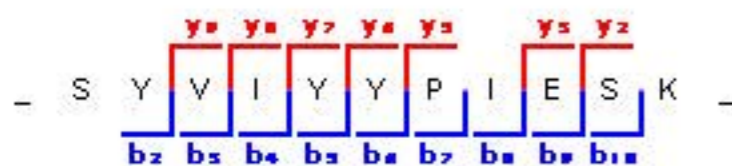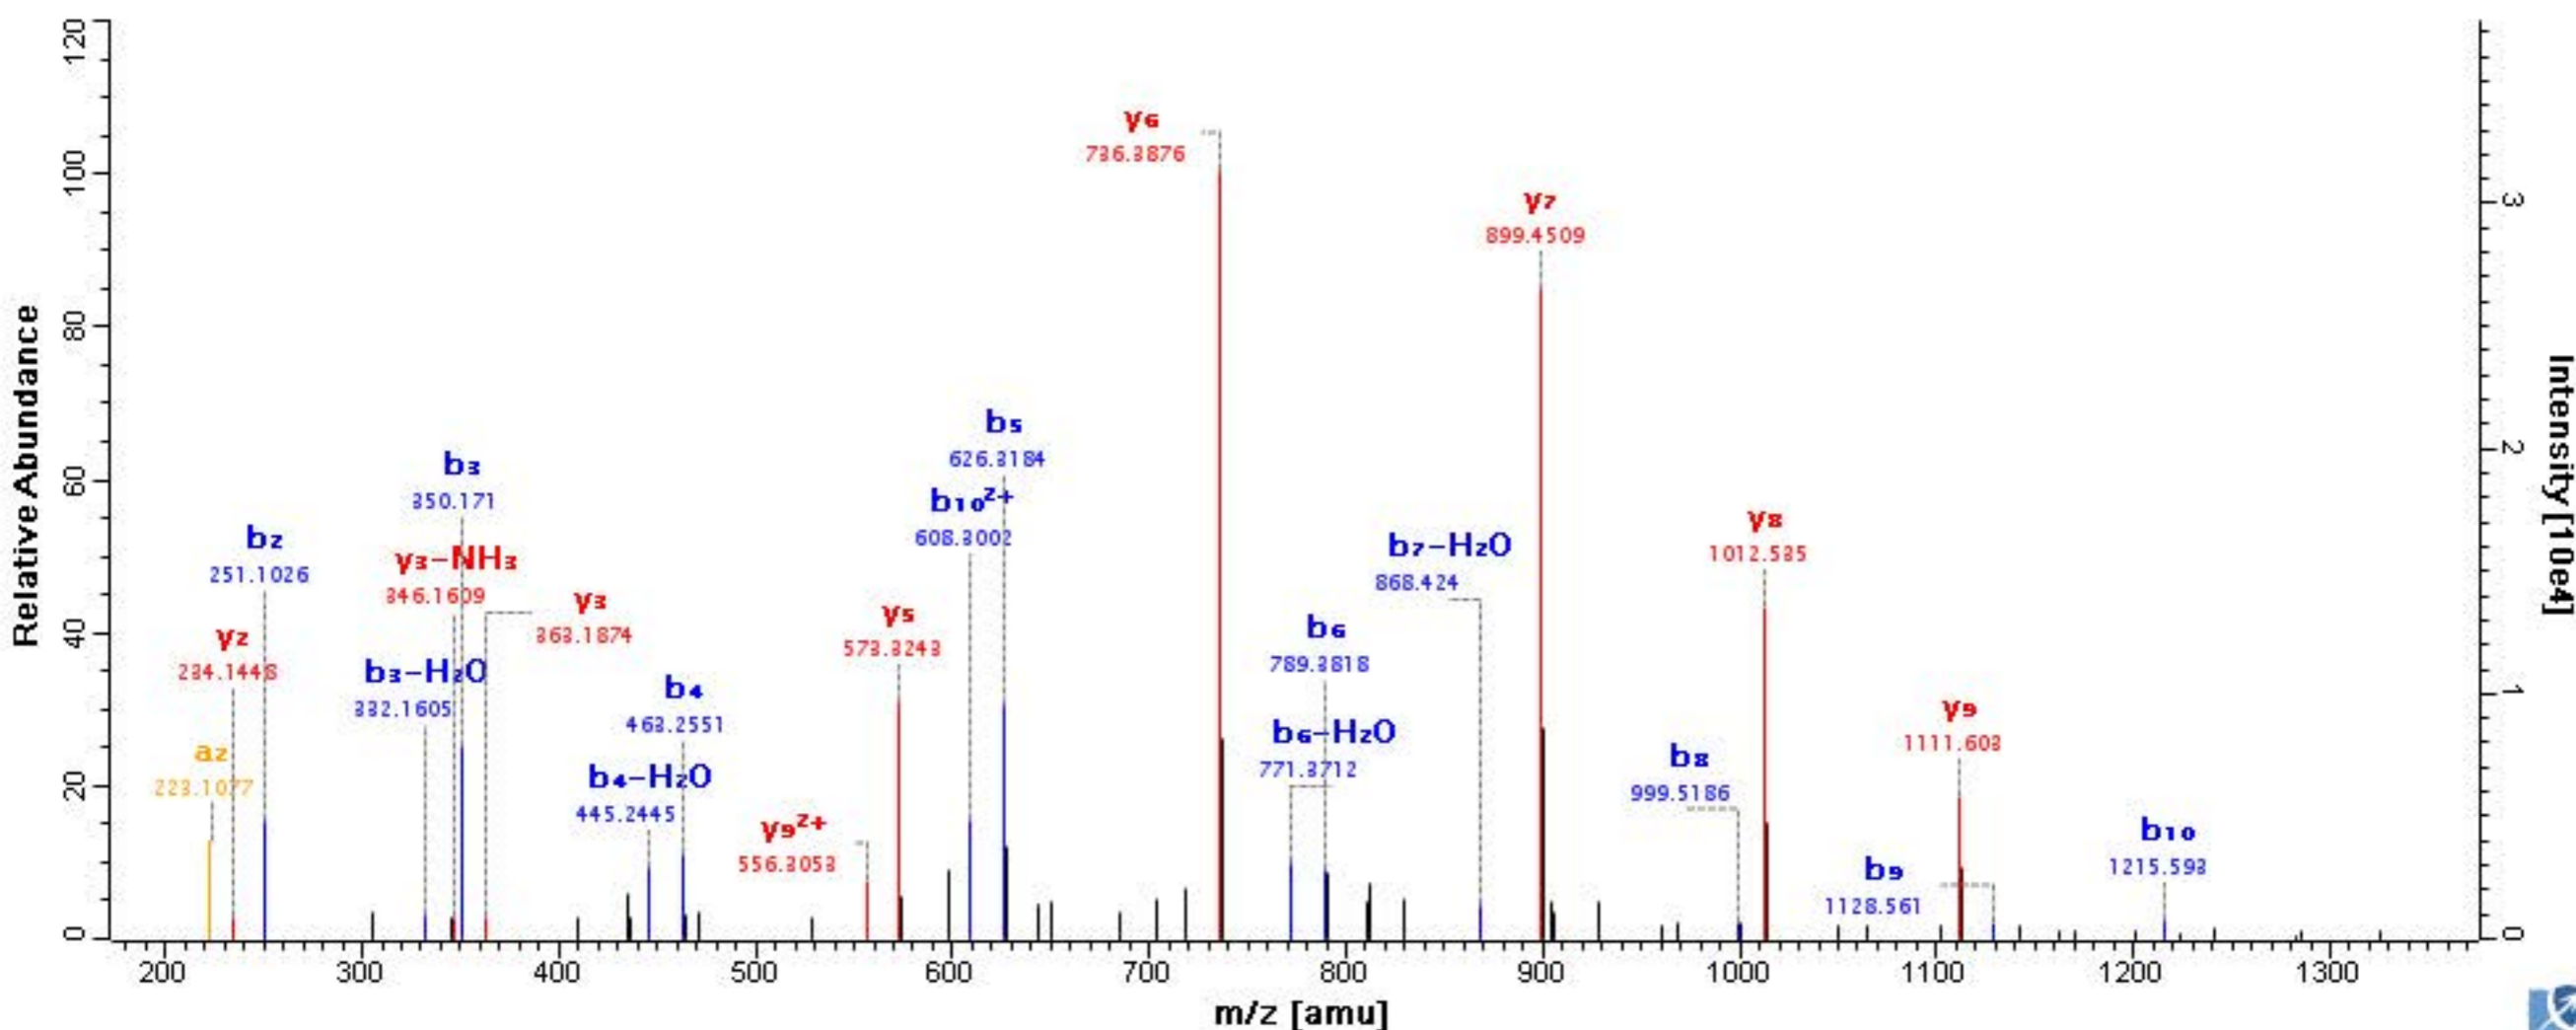

#### precursor information

|                   |                     |
|-------------------|---------------------|
| Mass:             | 1360.69176          |
| m/z:              | System.Collections. |
| Charge:           | System.Collections. |
| Retentiontime:    | System.Collections. |
| Score:            | 182.71              |
| Mass Error [ppm]: | 0.21242             |
| PEP:              | 1.6216E-49          |
| Precursor Type:   | MULTI               |

#### general information

|                       |           |
|-----------------------|-----------|
| Annotation:           | 9 of 11   |
| AminoAcids Coverage:  | 82 %      |
| Intensity Coverage:   | 67 %      |
| Protein Localisation: | 34 ... 44 |

| a ion    |         | b <sup>2+</sup> ion |         | b ion    |         |    |     |    | γ ion    |          | γ <sup>2+</sup> ion |         |
|----------|---------|---------------------|---------|----------|---------|----|-----|----|----------|----------|---------------------|---------|
| Δ dalton | mass    | Δ dalton            | mass    | Δ dalton | mass    |    | seq |    | Δ dalton | mass     | Δ dalton            | mass    |
|          | 60.0444 |                     | 88.0393 |          | 88.0393 | 1  | S   | 10 |          |          |                     |         |
| -0.1798  | 223.108 |                     | 251.103 | -0.0425  | 251.103 | 2  | Y   | 9  | 1274.67  |          |                     | 1274.67 |
|          | 322.176 |                     | 350.171 | -0.0224  | 350.171 | 3  | V   | 8  | 1111.6   | +0.00745 | 556.305             | -0.0255 |
|          | 435.26  |                     | 463.255 | -0.0369  | 463.255 | 4  | I   | 7  | 1012.53  | +0.01623 | 1012.53             |         |
|          | 598.324 |                     | 626.318 | +0.04496 | 626.318 | 5  | Y   | 6  | 899.451  | +0.01845 | 899.451             |         |
|          | 761.387 |                     | 789.382 | -0.1081  | 789.382 | 6  | Y   | 5  | 736.388  | -0.0535  | 736.388             |         |
|          | 858.44  |                     | 886.435 |          | 886.435 | 7  | P   | 4  | 573.324  | -0.0103  | 573.324             |         |
|          | 971.524 |                     | 999.519 | +0.01687 | 999.519 | 8  | I   | 3  | 476.271  |          | 476.271             |         |
|          | 1100.57 |                     | 1128.56 | +0.07638 | 1128.56 | 9  | E   | 2  | 363.187  | -0.1428  | 363.187             |         |
|          | 1187.6  | +0.0255             | 608.3   | +0.04704 | 1215.59 | 10 | S   | 1  | 234.145  | -0.0479  | 234.145             |         |
|          |         |                     |         |          |         | 11 | K   | 0  | 147.113  |          | 147.113             |         |



Source: 20130209\_VR\_Bsu\_TripleSILAC\_WTPPrkCPrpCReplicate3\_OG\_F02  
 Scannumber: 12517  
 Protein: BSU18260; yngJ  
 Peptide Score: 109.22  
 Method: ITMS; CID; 3

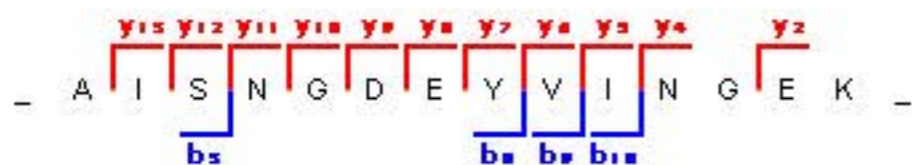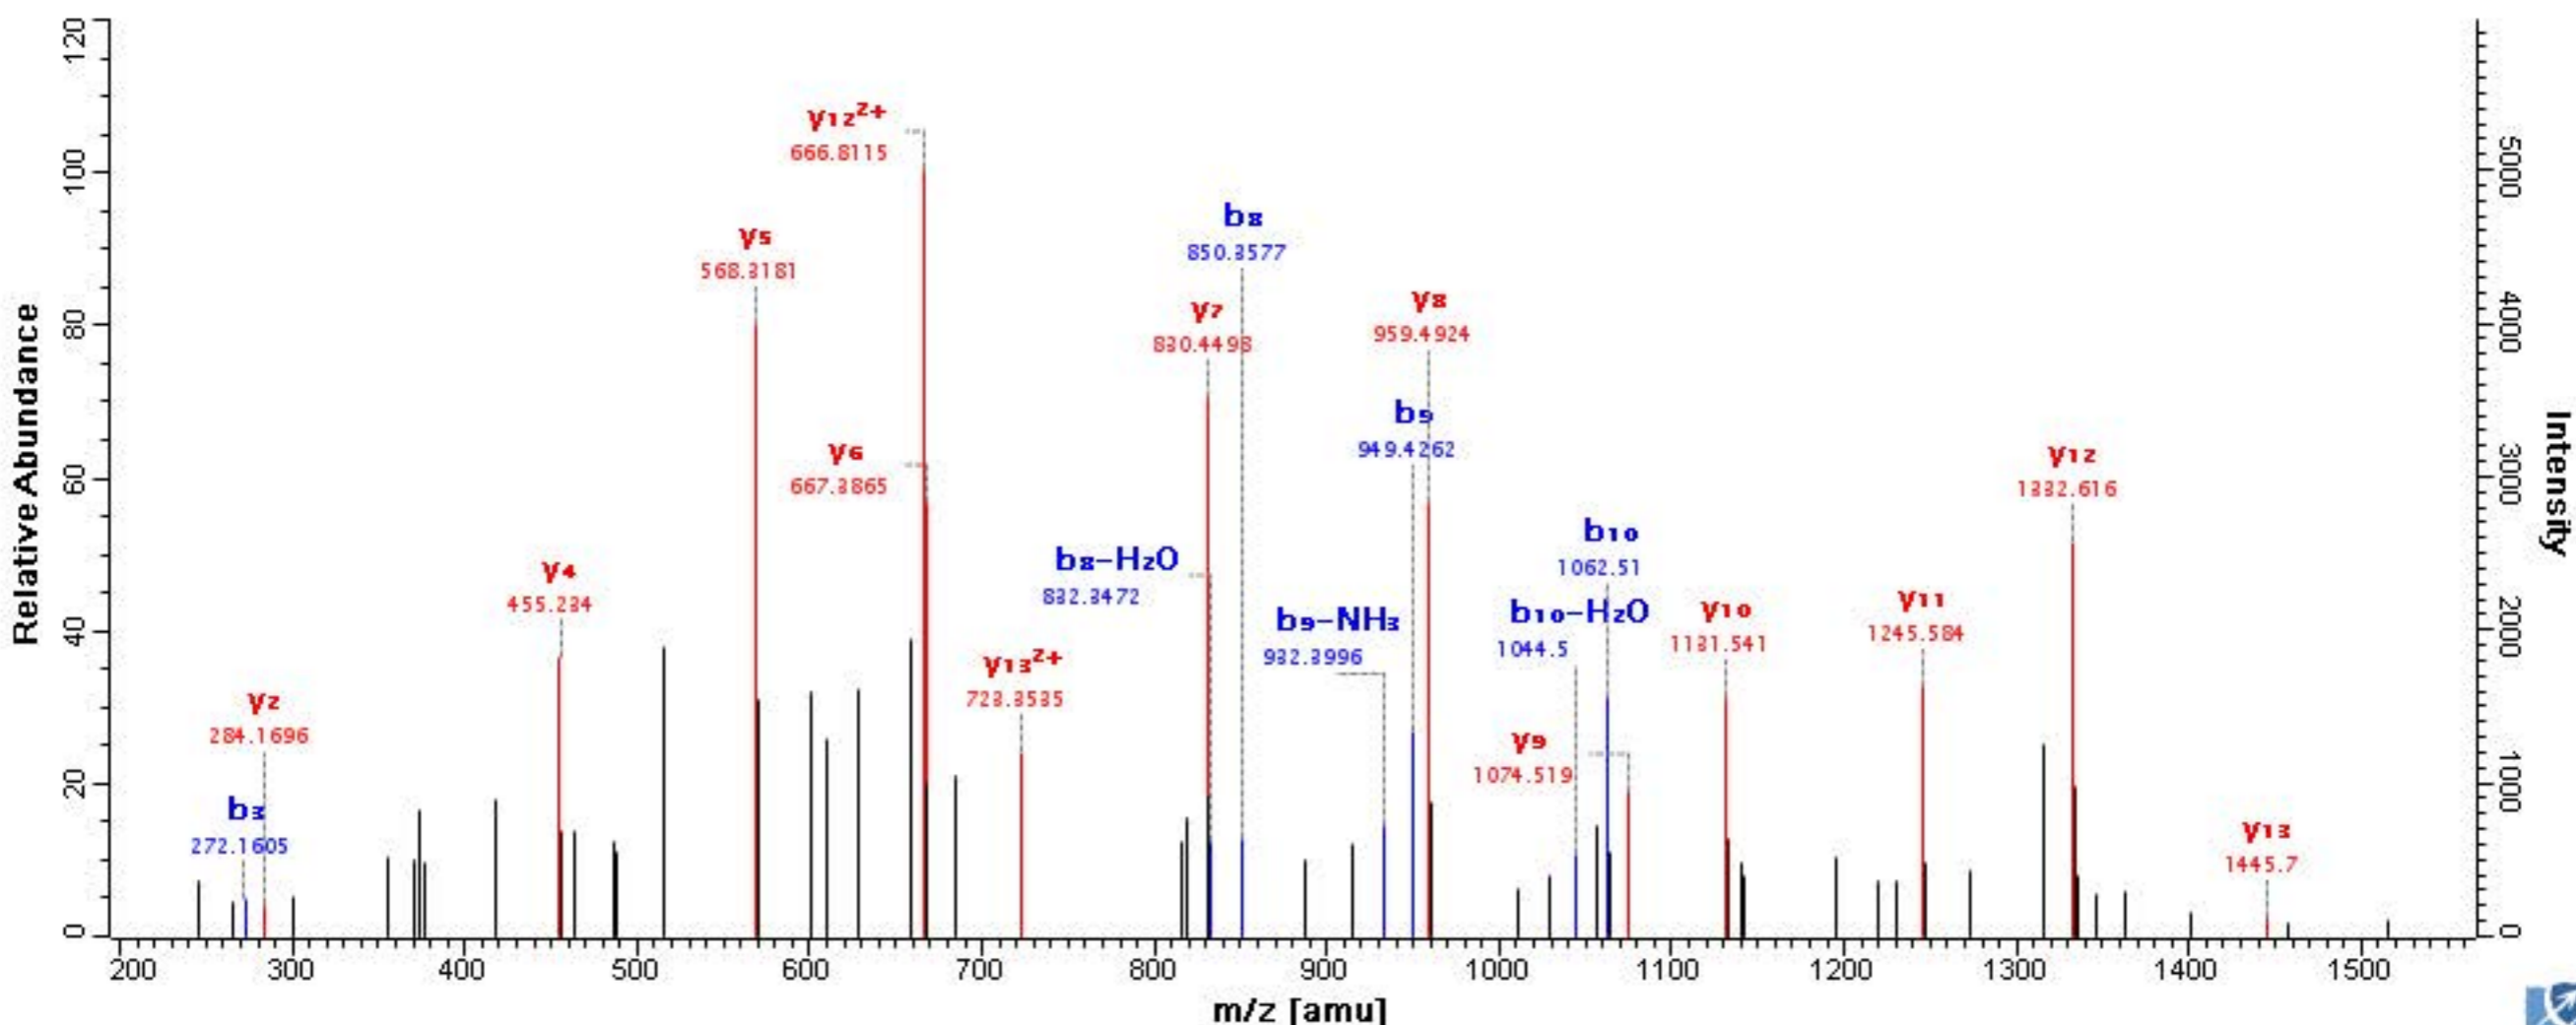

#### precursor information

|                   |                     |
|-------------------|---------------------|
| Mass:             | 1515.72797          |
| m/z:              | System.Collections. |
| Charge:           | System.Collections. |
| Retentiontime:    | System.Collections. |
| Score:            | 109.2207            |
| Mass Error [ppm]: | -1.1109             |
| PEP:              | 4.6271E-05          |
| Precursor Type:   | ISO                 |

#### general information

|                       |             |
|-----------------------|-------------|
| Annotation:           | 11 of 14    |
| AminoAcids Coverage:  | 79 %        |
| Intensity Coverage:   | 51 %        |
| Protein Localisation: | 141 ... 154 |

| b ion      |              |    |     |    | y ion        |            | y <sup>2+</sup> ion |            |
|------------|--------------|----|-----|----|--------------|------------|---------------------|------------|
| Δ dalton   | mass         |    | seq |    | Δ dalton     | mass       | Δ dalton            | mass       |
|            | 72.044390254 | 1  | A   | 13 |              |            |                     |            |
|            | 185.12845423 | 2  | I   | 12 | 1445.6998134 | +0.2844396 | 723.35354492        | +0.0640576 |
| +0.1847322 | 272.16048264 | 3  | S   | 11 | 1332.6157494 | +0.1386451 | 666.81151293        | +0.0048323 |
|            | 386.20341009 | 4  | N   | 10 | 1245.583721  | +0.0257761 | 1245.583721         |            |
|            | 443.22487382 | 5  | G   | 9  | 1131.5407935 | +0.0615014 | 1131.5407935        |            |
|            | 558.25181685 | 6  | D   | 8  | 1074.5193298 | +0.1288635 | 1074.5193298        |            |
|            | 687.29440994 | 7  | E   | 7  | 959.49238678 | +0.0599814 | 959.49238678        |            |
| +0.1260872 | 850.35773848 | 8  | Y   | 6  | 830.44979369 | +0.2501575 | 830.44979369        |            |
| +0.2067211 | 949.4261524  | 9  | V   | 5  | 667.38646515 | +0.0705661 | 667.38646515        |            |
| +0.1482309 | 1062.5102164 | 10 | I   | 4  | 568.31805123 | +0.006961  | 568.31805123        |            |
|            | 1176.5531438 | 11 | N   | 3  | 455.23398725 | -0.0681547 | 455.23398725        |            |
|            | 1233.5746075 | 12 | G   | 2  | 341.1910598  |            | 341.1910598         |            |
|            | 1362.6172006 | 13 | E   | 1  | 284.16959608 | +0.0285851 | 284.16959608        |            |
|            |              | 14 | K   | 0  | 155.12700298 |            | 155.12700298        |            |

Source: 20130209\_VR\_Bsu\_TripleSILAC\_WTPPrkCPrpCReplicate3\_OG\_F02  
 Scannumber: 18740  
 Protein: BSU14360; yknY  
 Peptide Score: 92.19  
 Method: ITMS; CID; 3

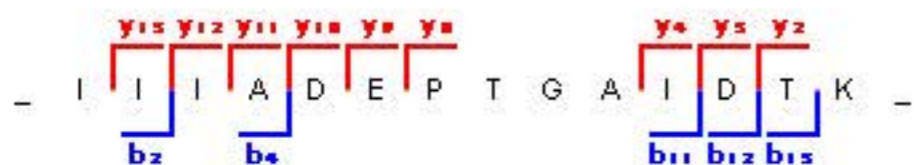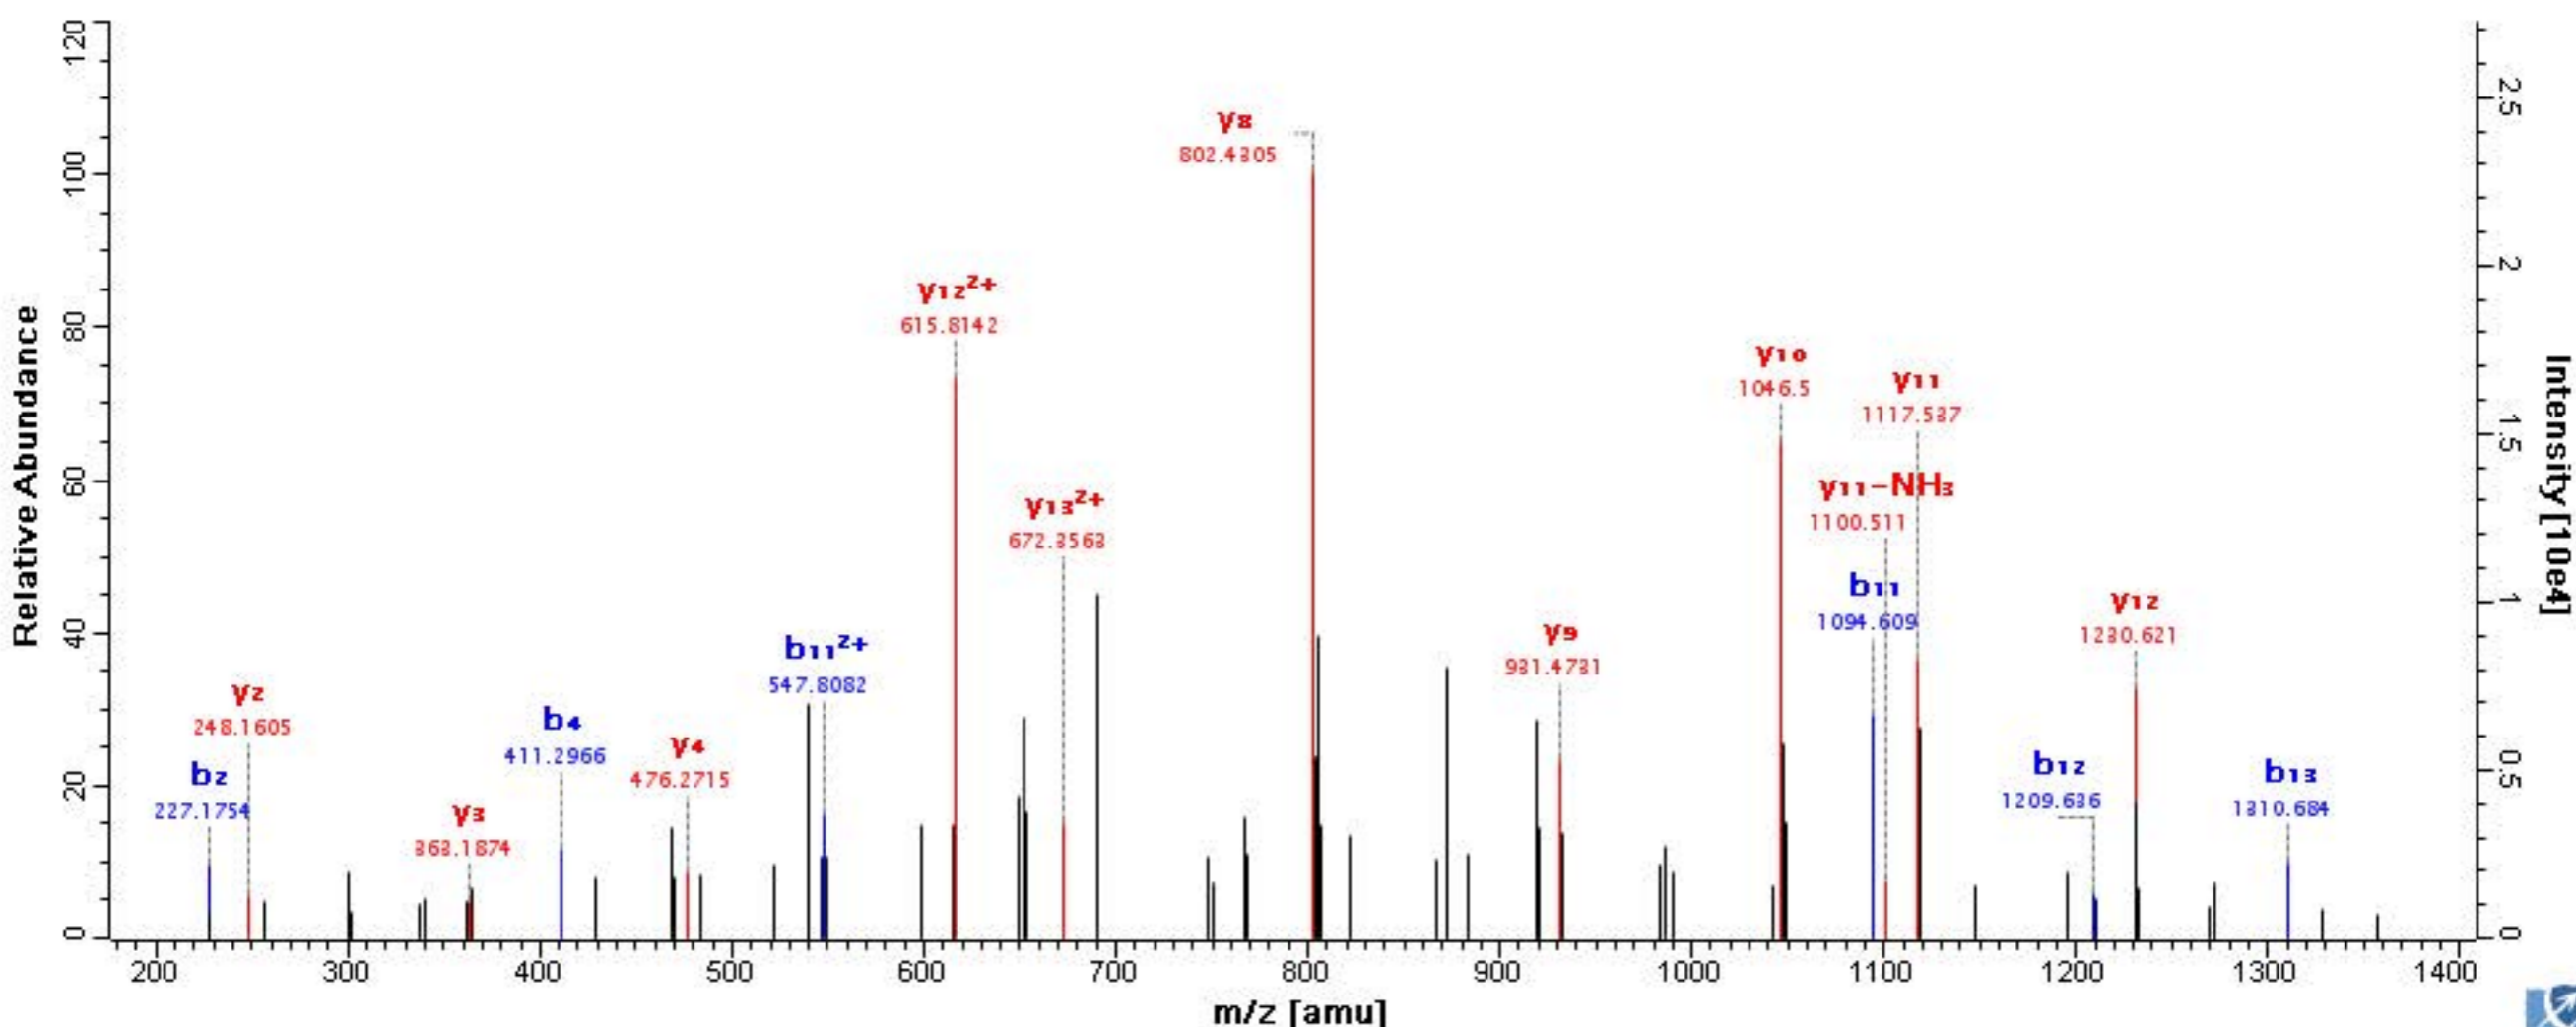

#### precursor information

|                   |                     |
|-------------------|---------------------|
| Mass:             | 1455.78219          |
| m/z:              | System.Collections. |
| Charge:           | System.Collections. |
| Retentiontime:    | System.Collections. |
| Score:            | 92.18982            |
| Mass Error [ppm]: | 0.075686            |
| PEP:              | 0.0003863           |
| Precursor Type:   | MULTI               |

#### general information

|                       |             |
|-----------------------|-------------|
| Annotation:           | 10 of 14    |
| AminoAcids Coverage:  | 71 %        |
| Intensity Coverage:   | 39 %        |
| Protein Localisation: | 162 ... 175 |

| $b^{2+}$ ion    |          | b ion           |          | seq             |      |                 | $\gamma$ ion       |                 | $\gamma^{2+}$ ion  |  |
|-----------------|----------|-----------------|----------|-----------------|------|-----------------|--------------------|-----------------|--------------------|--|
| $\Delta$ dalton | mass     | $\Delta$ dalton | mass     | $\Delta$ dalton | mass | $\Delta$ dalton | mass               | $\Delta$ dalton | mass               |  |
|                 | 114.0913 |                 | 114.0913 | 1               | I    | 13              |                    |                 |                    |  |
|                 | 227.1754 | -0.087895       | 227.1754 | 2               | I    | 12              | 1343.705           |                 | 672.3563 +0.089031 |  |
|                 | 340.2595 |                 | 340.2595 | 3               | I    | 11              | 1230.621 +0.05407  |                 | 615.8142 +0.28127  |  |
|                 | 411.2966 | +0.161975       | 411.2966 | 4               | A    | 10              | 1117.537 +0.057323 |                 | 1117.537           |  |
|                 | 526.3235 |                 | 526.3235 | 5               | D    | 9               | 1046.5 +0.06221    |                 | 1046.5             |  |
|                 | 655.3661 |                 | 655.3661 | 6               | E    | 8               | 931.4731 +0.055218 |                 | 931.4731           |  |
|                 | 752.4189 |                 | 752.4189 | 7               | P    | 7               | 802.4305 +0.057528 |                 | 802.4305           |  |
|                 | 853.4666 |                 | 853.4666 | 8               | T    | 6               | 705.3777           |                 | 705.3777           |  |
|                 | 910.488  |                 | 910.488  | 9               | G    | 5               | 604.3301           |                 | 604.3301           |  |
|                 | 981.5251 |                 | 981.5251 | 10              | A    | 4               | 547.3086           |                 | 547.3086           |  |
| -0.184582       | 547.8082 | -0.001536       | 1094.609 | 11              | I    | 3               | 476.2715 +0.075007 |                 | 476.2715           |  |
|                 | 1209.636 | -0.001013       | 1209.636 | 12              | D    | 2               | 363.1874 +0.090742 |                 | 363.1874           |  |
|                 | 1310.684 | +0.109878       | 1310.684 | 13              | T    | 1               | 248.1605 +0.008081 |                 | 248.1605           |  |
|                 |          |                 |          | 14              | K    | 0               | 147.1128           |                 | 147.1128           |  |

Source: 20130209\_VR\_Bsu\_TripleSILAC\_WTPPrkCPrpCReplicate3\_OG\_F02  
 Scannumber: 20293  
 Protein: BSU20820; yopO  
 Peptide Score: 88.02  
 Method: ITMS; CID; 3

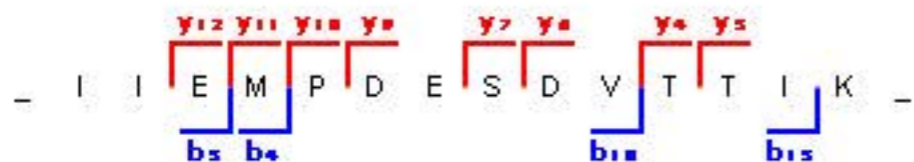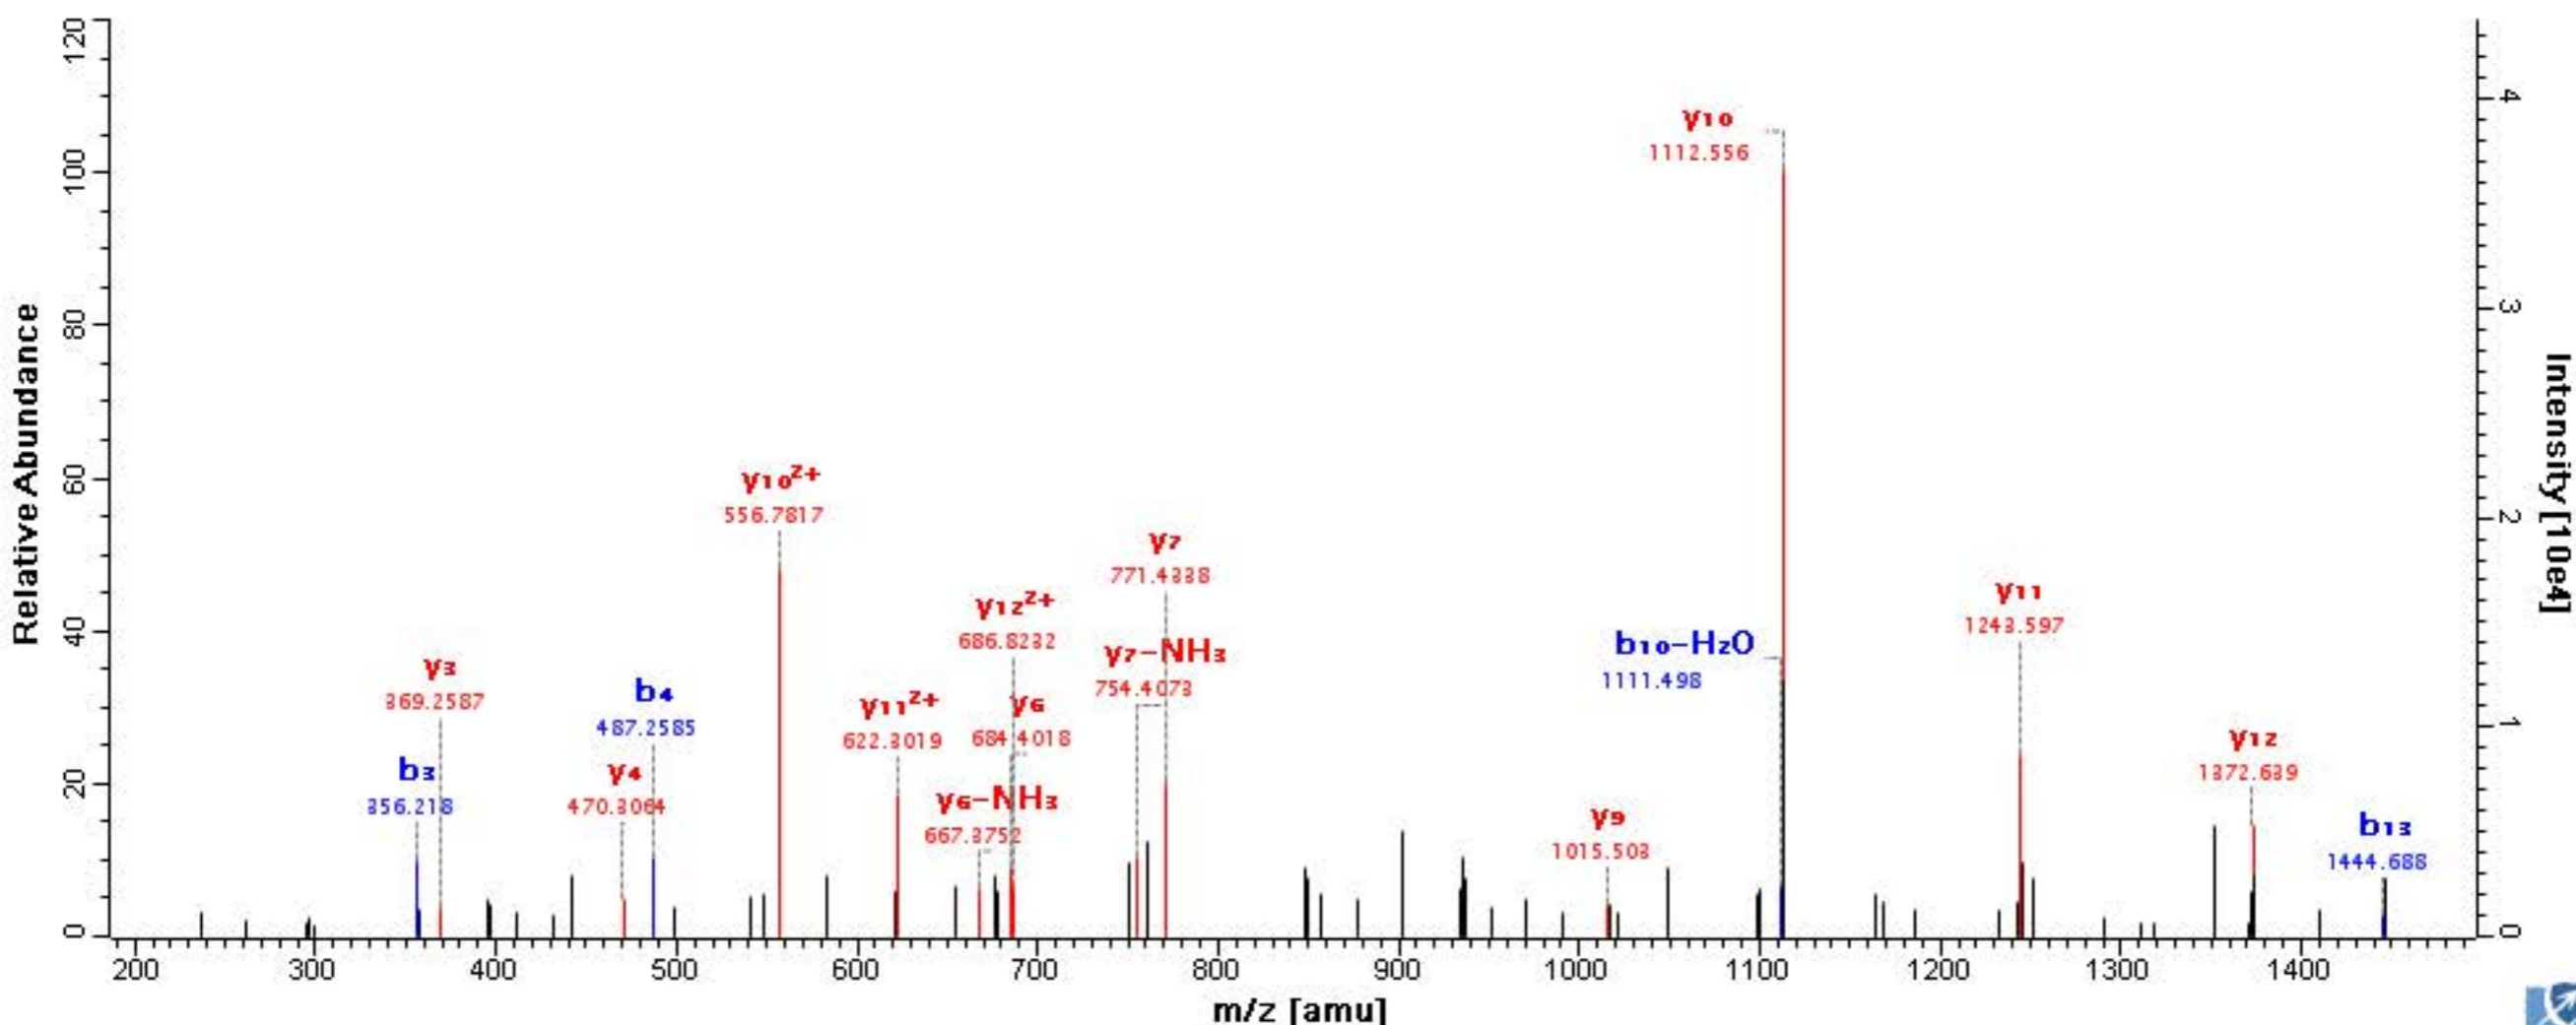

#### precursor information

|                   |                     |
|-------------------|---------------------|
| Mass:             | 1589.78582          |
| m/z:              | System.Collections. |
| Charge:           | System.Collections. |
| Retentiontime:    | System.Collections. |
| Score:            | 88.02058            |
| Mass Error [ppm]: | -0.0098175          |
| PEP:              | 0.00060395          |
| Precursor Type:   | MULTI               |

#### general information

|                       |           |
|-----------------------|-----------|
| Annotation:           | 10 of 14  |
| AminoAcids Coverage:  | 71 %      |
| Intensity Coverage:   | 47 %      |
| Protein Localisation: | 33 ... 46 |

| b ion      |              |    |     |    | y ion        |            | y <sup>2+</sup> ion |            |
|------------|--------------|----|-----|----|--------------|------------|---------------------|------------|
| Δ dalton   | mass         |    | seq |    | Δ dalton     | mass       | Δ dalton            | mass       |
|            | 114.09134045 | 1  | I   | 13 |              |            |                     |            |
|            | 227.17540443 | 2  | I   | 12 | 1485.7232509 |            | 1485.7232509        |            |
| +0.0421648 | 356.21799752 | 3  | E   | 11 | 1372.639187  | +0.3532447 | 686.82323171        | +0.1410017 |
| +0.3053606 | 487.25848213 | 4  | M   | 10 | 1243.5965939 | +0.071497  | 622.30193516        | +0.3361264 |
|            | 584.31124598 | 5  | P   | 9  | 1112.5561093 | +0.1499454 | 556.78169286        | +0.3307339 |
|            | 699.33818901 | 6  | D   | 8  | 1015.5033454 | +0.1799432 | 1015.5033454        |            |
|            | 828.38078211 | 7  | E   | 7  | 900.47640237 |            | 900.47640237        |            |
|            | 915.41281052 | 8  | S   | 6  | 771.43380927 | +0.1067791 | 771.43380927        |            |
|            | 1030.4397536 | 9  | D   | 5  | 684.40178086 | +0.2578871 | 684.40178086        |            |
|            | 1129.5081675 | 10 | V   | 4  | 569.37483783 |            | 569.37483783        |            |
|            | 1230.5558459 | 11 | T   | 3  | 470.30642391 | +0.2041352 | 470.30642391        |            |
|            | 1331.6035244 | 12 | T   | 2  | 369.25874544 | +0.215101  | 369.25874544        |            |
| +0.0832856 | 1444.6875884 | 13 | I   | 1  | 268.21106696 |            | 268.21106696        |            |
|            |              | 14 | K   | 0  | 155.12700298 |            | 155.12700298        |            |

Source: 20130209\_VR\_Bsu\_TripleSILAC\_WTPPrkCPrpCReplicate3\_OG\_F03  
 Scannumber: 30230  
 Protein: BSU22500; jojD; ypjD  
 Peptide Score: 108.56  
 Method: ITMS; CID; 3

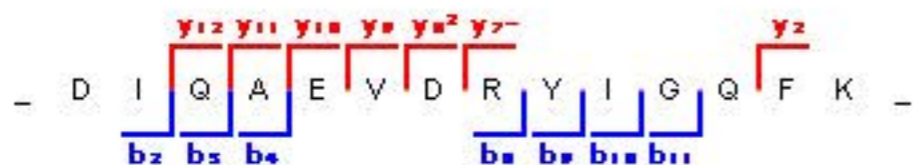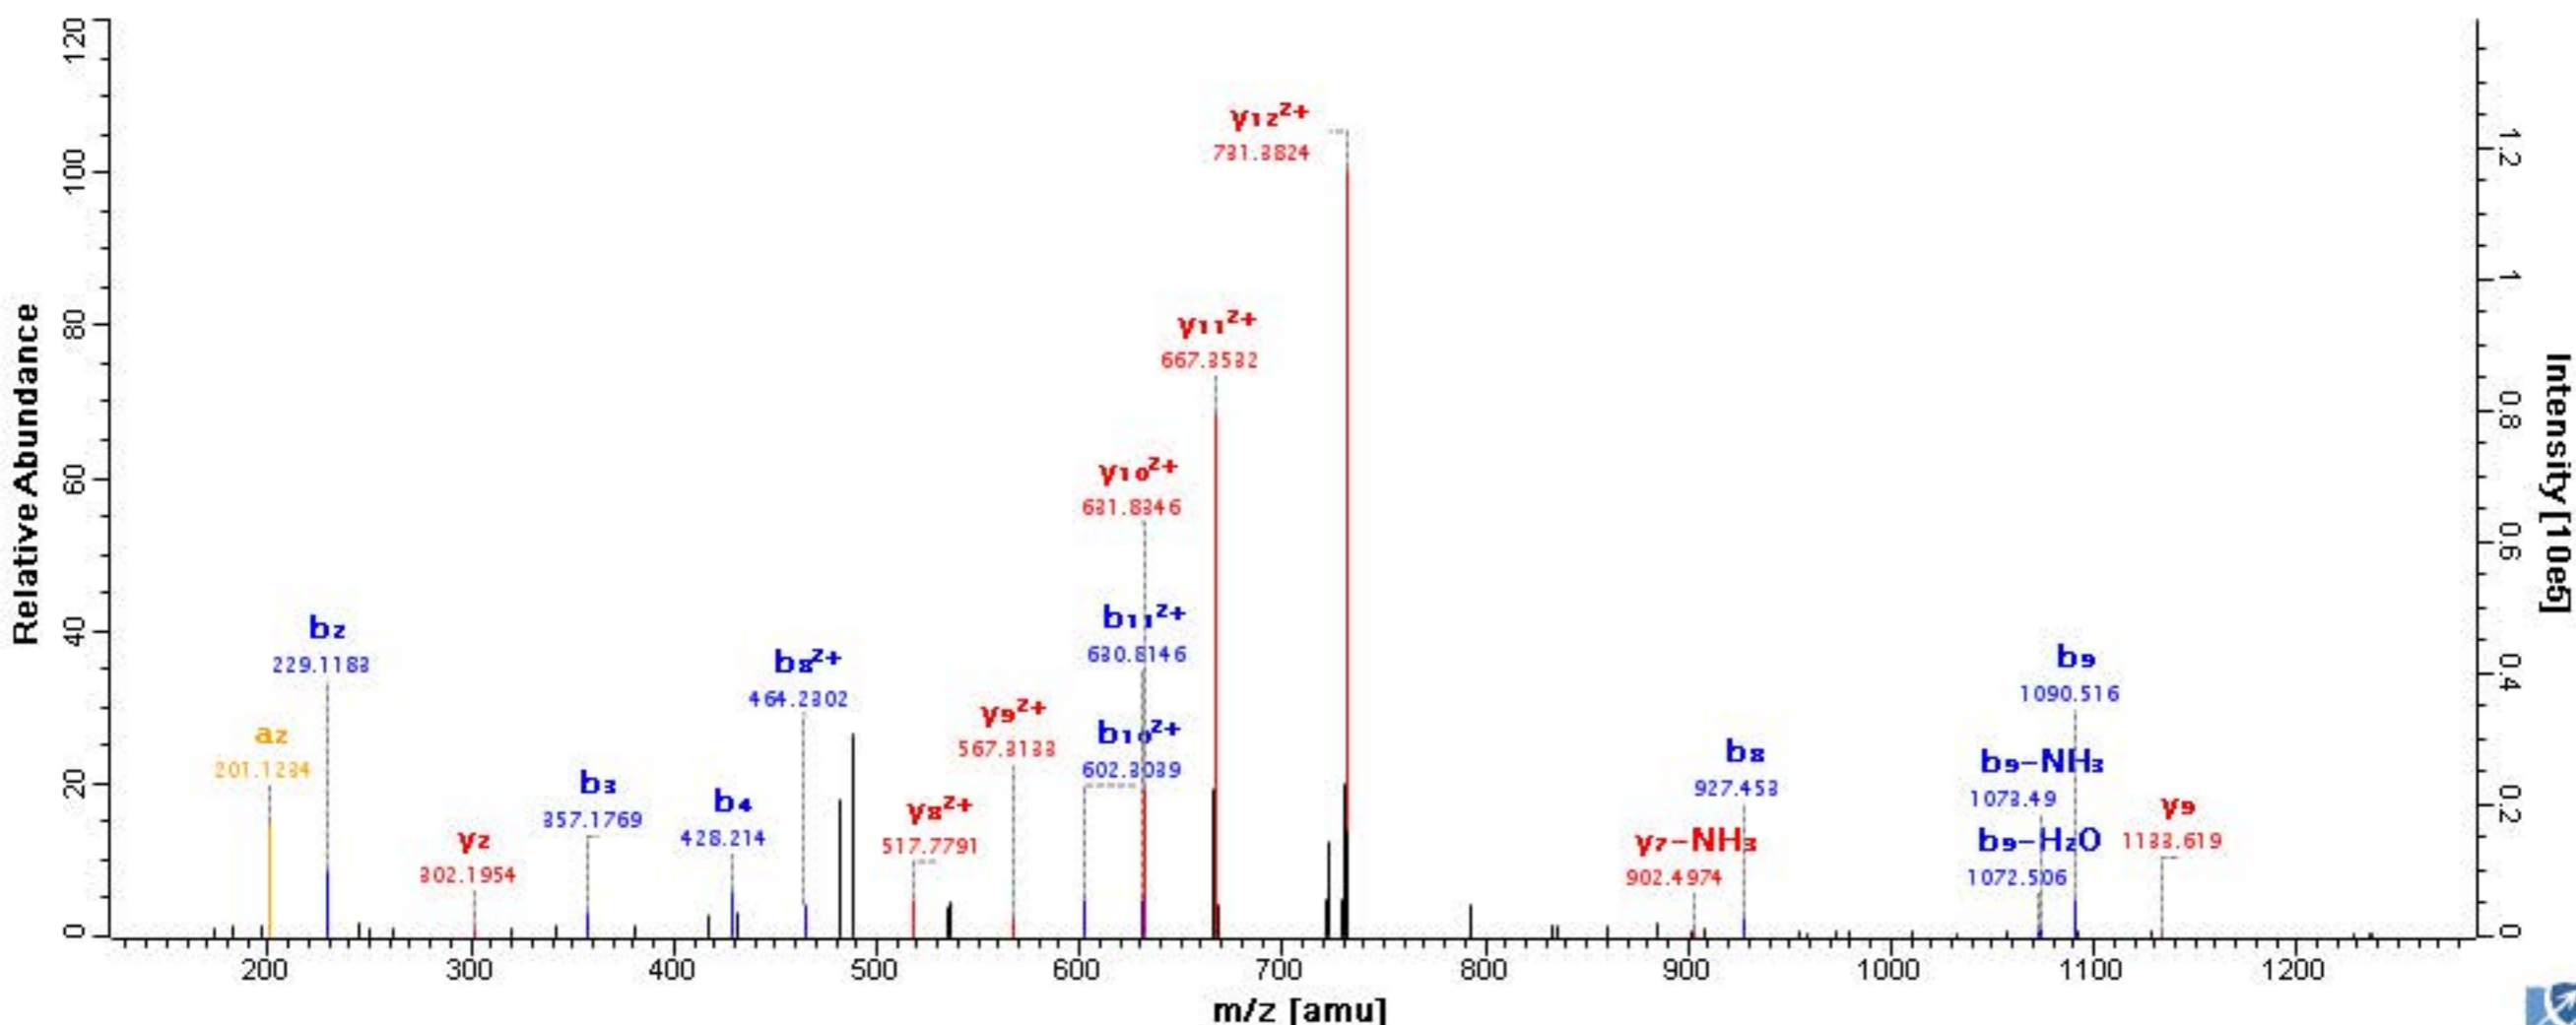

#### precursor information

|                   |                     |
|-------------------|---------------------|
| Mass:             | 1680.84688          |
| m/z:              | System.Collections. |
| Charge:           | System.Collections. |
| Retentiontime:    | System.Collections. |
| Score:            | 108.5638            |
| Mass Error [ppm]: | -0.14841            |
| PEP:              | 1.4305E-06          |
| Precursor Type:   | MULTI               |

#### general information

|                       |          |
|-----------------------|----------|
| Annotation:           | 11 of 14 |
| AminoAcids Coverage:  | 79 %     |
| Intensity Coverage:   | 60 %     |
| Protein Localisation: | 8 ... 21 |

| a ion    |         | b <sup>2+</sup> ion |         | b ion    |         |    |     |    | y ion    |         | y <sup>2+</sup> ion |         |
|----------|---------|---------------------|---------|----------|---------|----|-----|----|----------|---------|---------------------|---------|
| Δ dalton | mass    | Δ dalton            | mass    | Δ dalton | mass    |    | seq |    | Δ dalton | mass    | Δ dalton            | mass    |
|          | 88.0393 |                     | 116.034 |          | 116.034 | 1  | D   | 13 |          |         |                     |         |
| -0.1656  | 201.123 |                     | 229.118 | -0.1413  | 229.118 | 2  | I   | 12 | 1574.84  |         | 1574.84             |         |
|          | 329.182 |                     | 357.177 | +0.0926  | 357.177 | 3  | Q   | 11 | 1461.76  |         | 731.382             | +0.0343 |
|          | 400.219 |                     | 428.214 | +0.0399  | 428.214 | 4  | A   | 10 | 1333.7   |         | 667.353             | +0.1375 |
|          | 529.262 |                     | 557.257 |          | 557.257 | 5  | E   | 9  | 1262.66  |         | 631.835             | +0.2218 |
|          | 628.33  |                     | 656.325 |          | 656.325 | 6  | V   | 8  | 1133.62  | +0.1122 | 567.313             | +0.2372 |
|          | 743.357 |                     | 771.352 |          | 771.352 | 7  | D   | 7  | 1034.55  |         | 517.779             | -0.1519 |
|          | 899.458 | +0.1976             | 464.23  | -0.0686  | 927.453 | 8  | R   | 6  | 919.524  |         | 919.524             |         |
|          | 1062.52 |                     | 1090.52 | +0.1401  | 1090.52 | 9  | Y   | 5  | 763.423  |         | 763.423             |         |
|          | 1175.61 | +0.3939             | 602.304 |          | 1203.6  | 10 | I   | 4  | 600.36   |         | 600.36              |         |
|          | 1232.63 | -0.3464             | 630.815 |          | 1260.62 | 11 | G   | 3  | 487.275  |         | 487.275             |         |
|          | 1360.69 |                     | 1388.68 |          | 1388.68 | 12 | Q   | 2  | 430.254  |         | 430.254             |         |
|          | 1507.75 |                     | 1535.75 |          | 1535.75 | 13 | F   | 1  | 302.195  | -0.0147 | 302.195             |         |
|          |         |                     |         |          |         | 14 | K   | 0  | 155.127  |         | 155.127             |         |

Source: 20130209\_VR\_Bsu\_TripleSILAC\_WTPPrkCPrpCReplicate3\_OG\_F06  
 Scannumber: 10301  
 Protein: BSU39310; J3C; yxiC  
 Peptide Score: 88.34  
 Method: ITMS; CID; 3

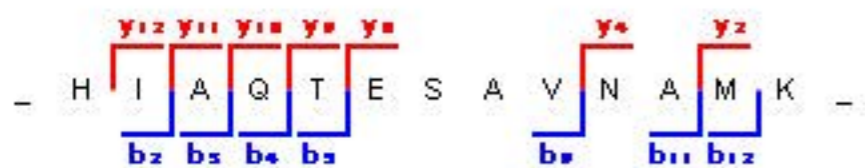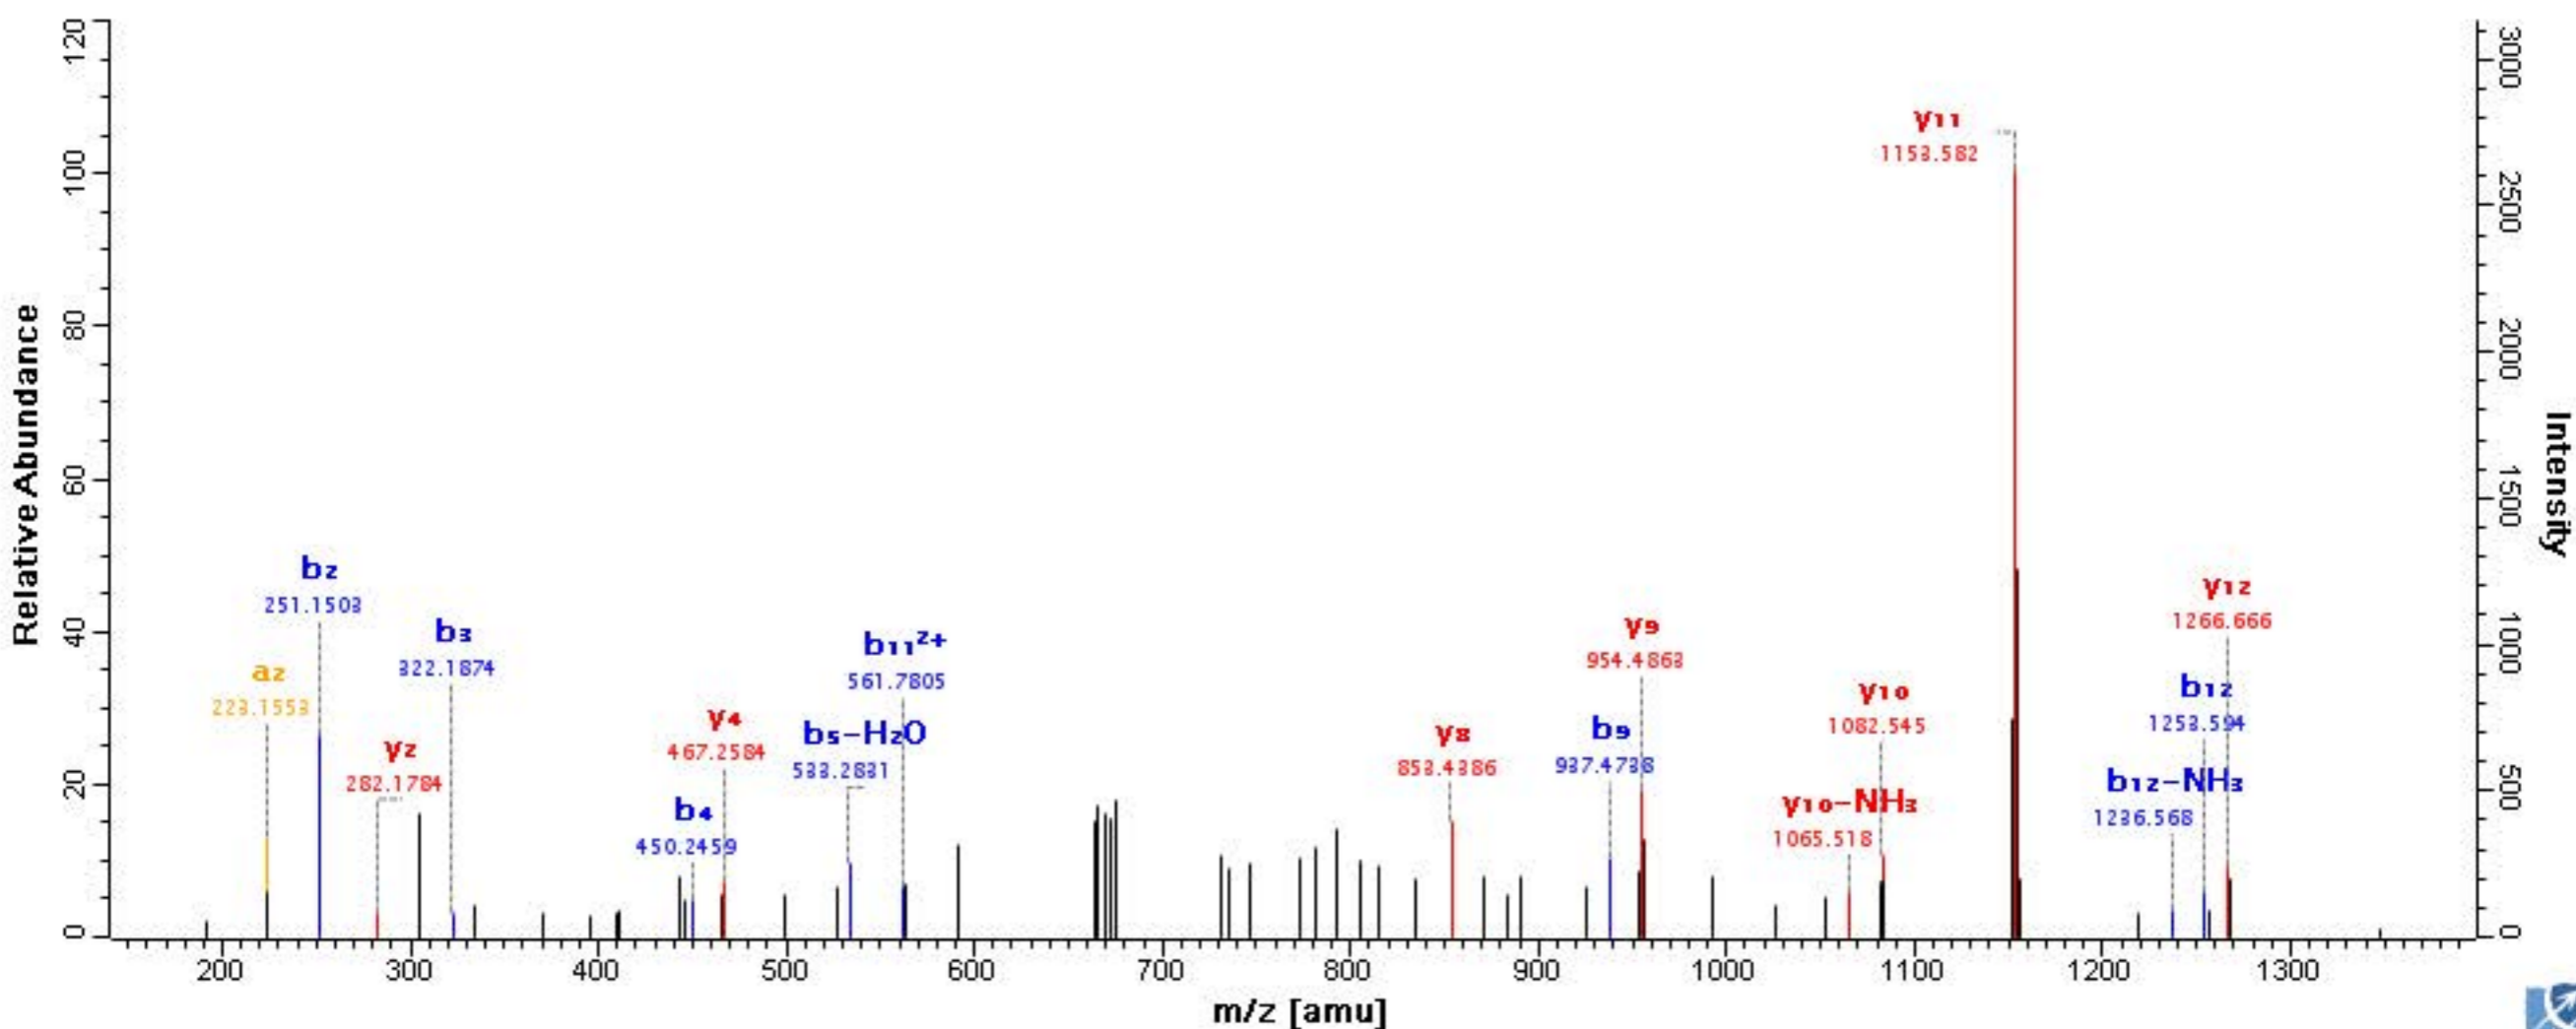

#### precursor information

|                   |                     |
|-------------------|---------------------|
| Mass:             | 1398.69257          |
| m/z:              | System.Collections. |
| Charge:           | System.Collections. |
| Retentiontime:    | System.Collections. |
| Score:            | 88.33767            |
| Mass Error [ppm]: | 0.017757            |
| PEP:              | 0.0010638           |
| Precursor Type:   | MULTI               |

#### general information

|                       |           |
|-----------------------|-----------|
| Annotation:           | 9 of 13   |
| AminoAcids Coverag    | 69 %      |
| Intensity Coverage:   | 34 %      |
| Protein Localisation: | 66 ... 78 |

| a ion     |          | b <sup>2+</sup> ion |          | b ion     |          |    |     | y ion    |                    |
|-----------|----------|---------------------|----------|-----------|----------|----|-----|----------|--------------------|
| Δ dalton  | mass     | Δ dalton            | mass     | Δ dalton  | mass     |    | seq | Δ dalton | mass               |
|           | 110.0713 |                     | 138.0662 |           | 138.0662 | 1  | H   | 12       |                    |
| -0.092044 | 223.1553 |                     | 251.1503 | -0.043014 | 251.1503 | 2  | I   | 11       | 1266.666 +0.018306 |
|           | 294.1925 |                     | 322.1874 | +0.168042 | 322.1874 | 3  | A   | 10       | 1153.582 +0.040725 |
|           | 422.251  |                     | 450.2459 | +0.224882 | 450.2459 | 4  | Q   | 9        | 1082.545 +0.19466  |
|           | 523.2987 |                     | 551.2936 |           | 551.2936 | 5  | T   | 8        | 954.4863 +0.021243 |
|           | 652.3413 |                     | 680.3362 |           | 680.3362 | 6  | E   | 7        | 853.4386 +0.147229 |
|           | 739.3733 |                     | 767.3682 |           | 767.3682 | 7  | S   | 6        | 724.396            |
|           | 810.4104 |                     | 838.4054 |           | 838.4054 | 8  | A   | 5        | 637.364            |
|           | 909.4789 |                     | 937.4738 | +0.008651 | 937.4738 | 9  | V   | 4        | 566.3269           |
|           | 1023.522 |                     | 1051.517 |           | 1051.517 | 10 | N   | 3        | 467.2584 -0.000136 |
|           | 1094.559 | +0.013767           | 561.7805 |           | 1122.554 | 11 | A   | 2        | 353.2155           |
|           | 1225.599 |                     | 1253.594 | +0.177676 | 1253.594 | 12 | M   | 1        | 282.1784 +0.063914 |
|           |          |                     |          |           |          | 13 | K   | 0        | 151.1379           |

Source: 20130209\_VR\_Bsu\_TripleSILAC\_WTPrkCPrpCReplicate3\_OG\_F06  
 Scannumber: 13125  
 Protein: BSU38990; N15K; scoA; yxjD  
 Peptide Score: 129.1  
 Method: ITMS; CID; 3

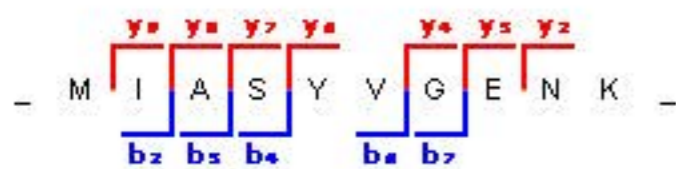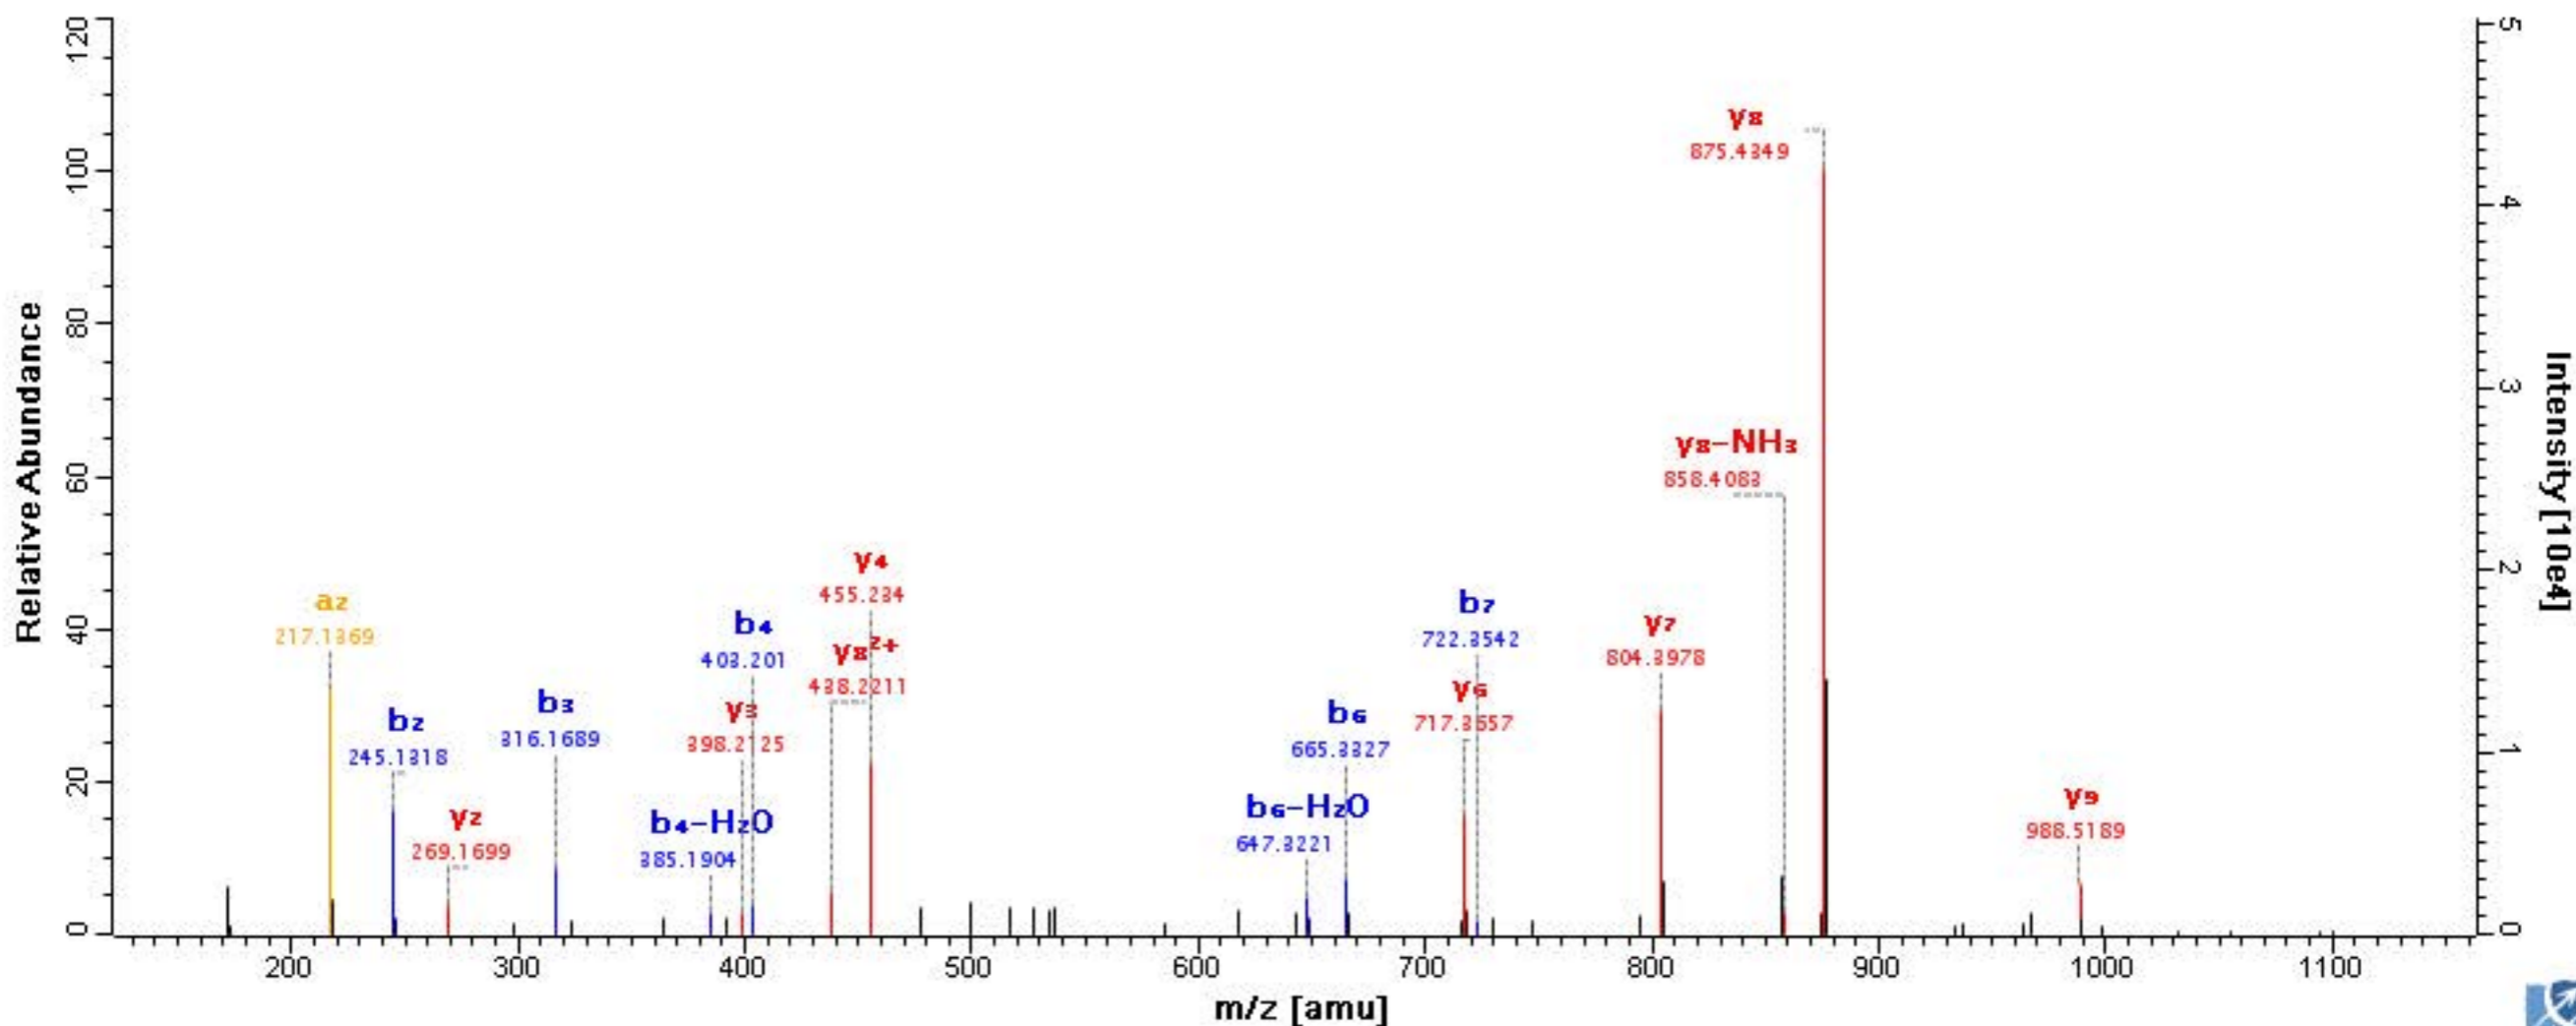

### precursor information

|                   |                     |
|-------------------|---------------------|
| Mass:             | 1118.55164          |
| m/z:              | System.Collections. |
| Charge:           | System.Collections. |
| Retentiontime:    | System.Collections. |
| Score:            | 129.099             |
| Mass Error [ppm]: | -0.45055            |
| PEP:              | 2.4153E-10          |
| Precursor Type:   | ISO                 |

### general information

|                       |           |
|-----------------------|-----------|
| Annotation:           | 8 of 10   |
| AminoAcids Coverage:  | 80 %      |
| Intensity Coverage:   | 67 %      |
| Protein Localisation: | 73 ... 82 |

| a ion     |          | b ion     |          | seq |   |   | y ion    |           | y <sup>2+</sup> ion |           |
|-----------|----------|-----------|----------|-----|---|---|----------|-----------|---------------------|-----------|
| Δ dalton  | mass     | Δ dalton  | mass     |     |   |   | Δ dalton | mass      | Δ dalton            | mass      |
|           | 104.0528 |           | 132.0478 | 1   | M | 9 |          |           |                     |           |
| -0.024743 | 217.1369 | -0.008931 | 245.1318 | 2   | I | 8 | 988.5189 | +0.068589 | 988.5189            |           |
|           | 288.174  | +0.003424 | 316.1689 | 3   | A | 7 | 875.4349 | +0.122745 | 438.2211            | +0.181453 |
|           | 375.2061 | +0.053977 | 403.201  | 4   | S | 6 | 804.3978 | +0.068612 | 804.3978            |           |
|           | 538.2694 |           | 566.2643 | 5   | Y | 5 | 717.3657 | +0.07293  | 717.3657            |           |
|           | 637.3378 | +0.112664 | 665.3327 | 6   | V | 4 | 554.3024 |           | 554.3024            |           |
|           | 694.3593 | +0.22505  | 722.3542 | 7   | G | 3 | 455.234  | +0.054465 | 455.234             |           |
|           | 823.4019 |           | 851.3968 | 8   | E | 2 | 398.2125 | +0.199403 | 398.2125            |           |
|           | 937.4448 |           | 965.4397 | 9   | N | 1 | 269.1699 | -0.021218 | 269.1699            |           |
|           |          |           |          | 10  | K | 0 | 155.127  |           | 155.127             |           |

Source: 20130209\_VR\_Bsu\_TripleSILAC\_WTPPrkCPrpCReplicate3\_OG\_F06  
 Scannumber: 26046  
 Protein: BSU11310; comZ  
 Peptide Score: 177.78  
 Method: ITMS; CID; 3

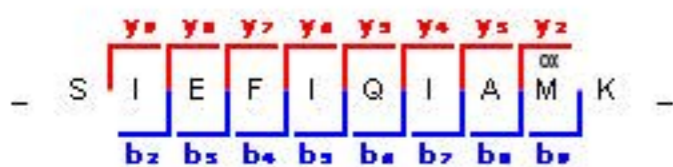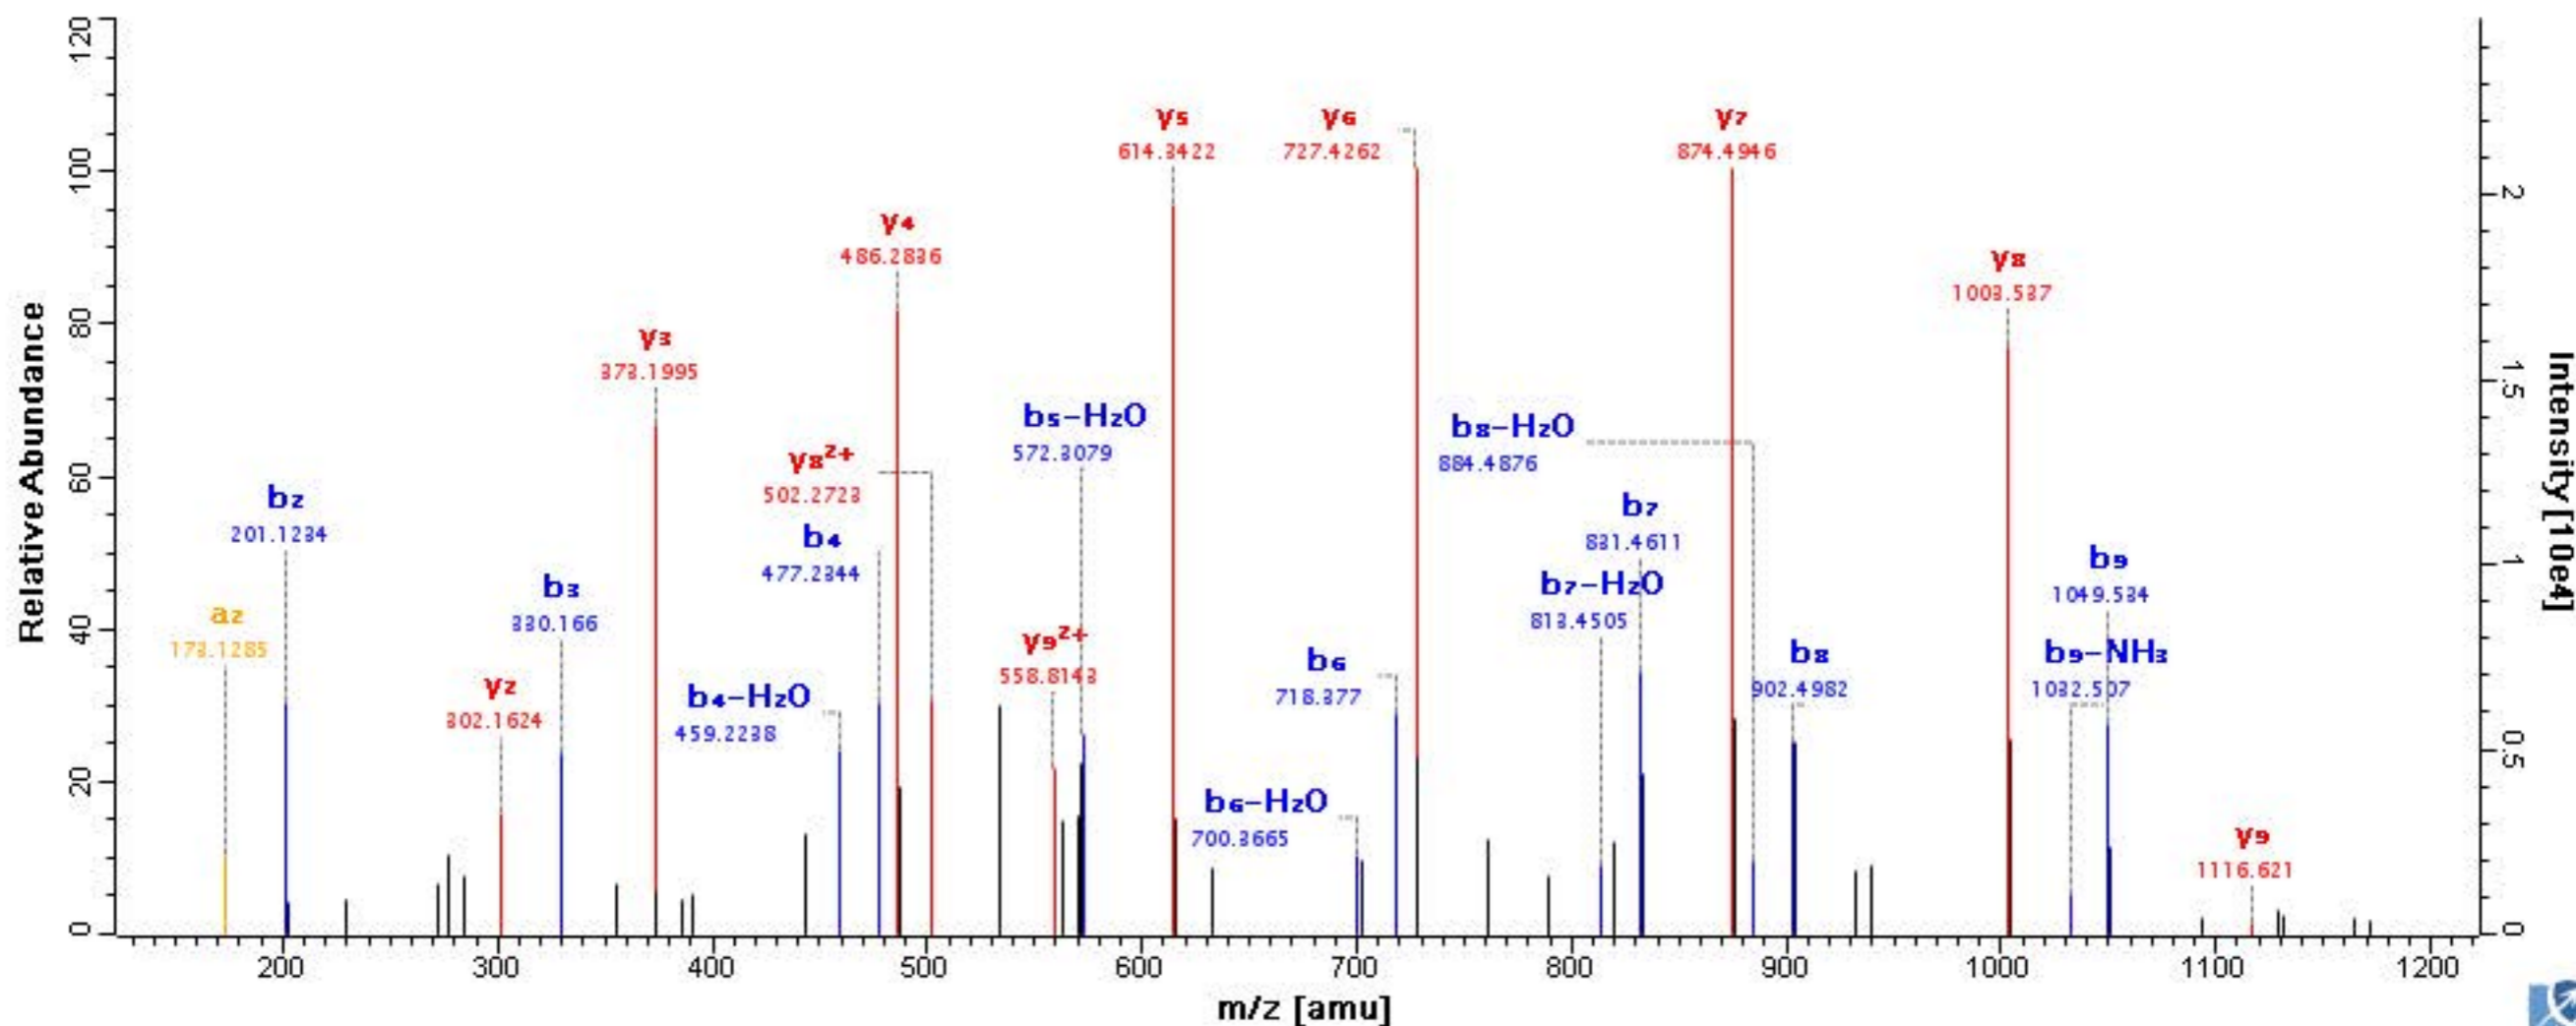

#### precursor information

|                   |                     |
|-------------------|---------------------|
| Mass:             | 1202.64576          |
| m/z:              | System.Collections. |
| Charge:           | System.Collections. |
| Retentiontime:    | System.Collections. |
| Score:            | 177.7784            |
| Mass Error [ppm]: | -0.23789            |
| PEP:              | 2.0228E-52          |
| Precursor Type:   | ISO                 |

#### general information

|                       |          |
|-----------------------|----------|
| Annotation:           | 8 of 10  |
| AminoAcids Coverage:  | 80 %     |
| Intensity Coverage:   | 69 %     |
| Protein Localisation: | 6 ... 15 |

| a ion    |          | b ion     |          |    | seq |          | y ion    |           | y <sup>2+</sup> ion |           |
|----------|----------|-----------|----------|----|-----|----------|----------|-----------|---------------------|-----------|
| Δ dalton | mass     | Δ dalton  | mass     |    |     | Δ dalton | mass     | Δ dalton  | mass                |           |
|          | 60.04439 |           | 88.0393  | 1  | S   | 9        |          |           |                     |           |
| +0.04719 | 173.1285 | -0.023958 | 201.1234 | 2  | I   | 8        | 1116.621 | -0.338211 | 558.8143            | +0.212144 |
|          | 302.171  | +0.011833 | 330.166  | 3  | E   | 7        | 1003.537 | +0.136111 | 502.2723            | +0.371668 |
|          | 449.2395 | +0.044494 | 477.2344 | 4  | F   | 6        | 874.4946 | +0.101007 | 874.4946            |           |
|          | 562.3235 |           | 590.3184 | 5  | I   | 5        | 727.4262 | +0.13164  | 727.4262            |           |
|          | 690.3821 | +0.015256 | 718.377  | 6  | Q   | 4        | 614.3422 | +0.098089 | 614.3422            |           |
|          | 803.4662 | +0.070413 | 831.4611 | 7  | I   | 3        | 486.2836 | +0.081593 | 486.2836            |           |
|          | 874.5033 | +0.069127 | 902.4982 | 8  | A   | 2        | 373.1995 | +0.055703 | 373.1995            |           |
|          | 1021.539 | +0.068823 | 1049.534 | 9  | M   | 1        | 302.1624 | +0.021436 | 302.1624            |           |
|          |          |           |          | 10 | K   | 0        | 155.127  |           | 155.127             |           |

Source: 20130209\_VR\_Bsu\_TripleSILAC\_WTPPrkCPrpCReplicate3\_OG\_FD6  
 Scannumber: 31774  
 Protein: BSU34830; yvzA  
 Peptide Score: 161.21  
 Method: ITMS; CID; 3

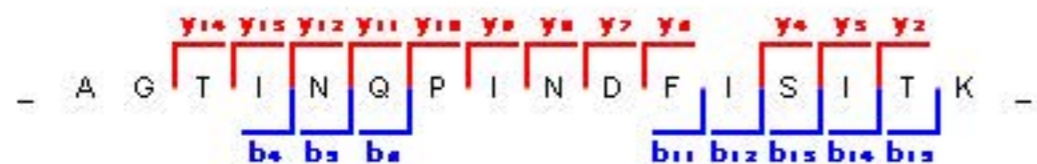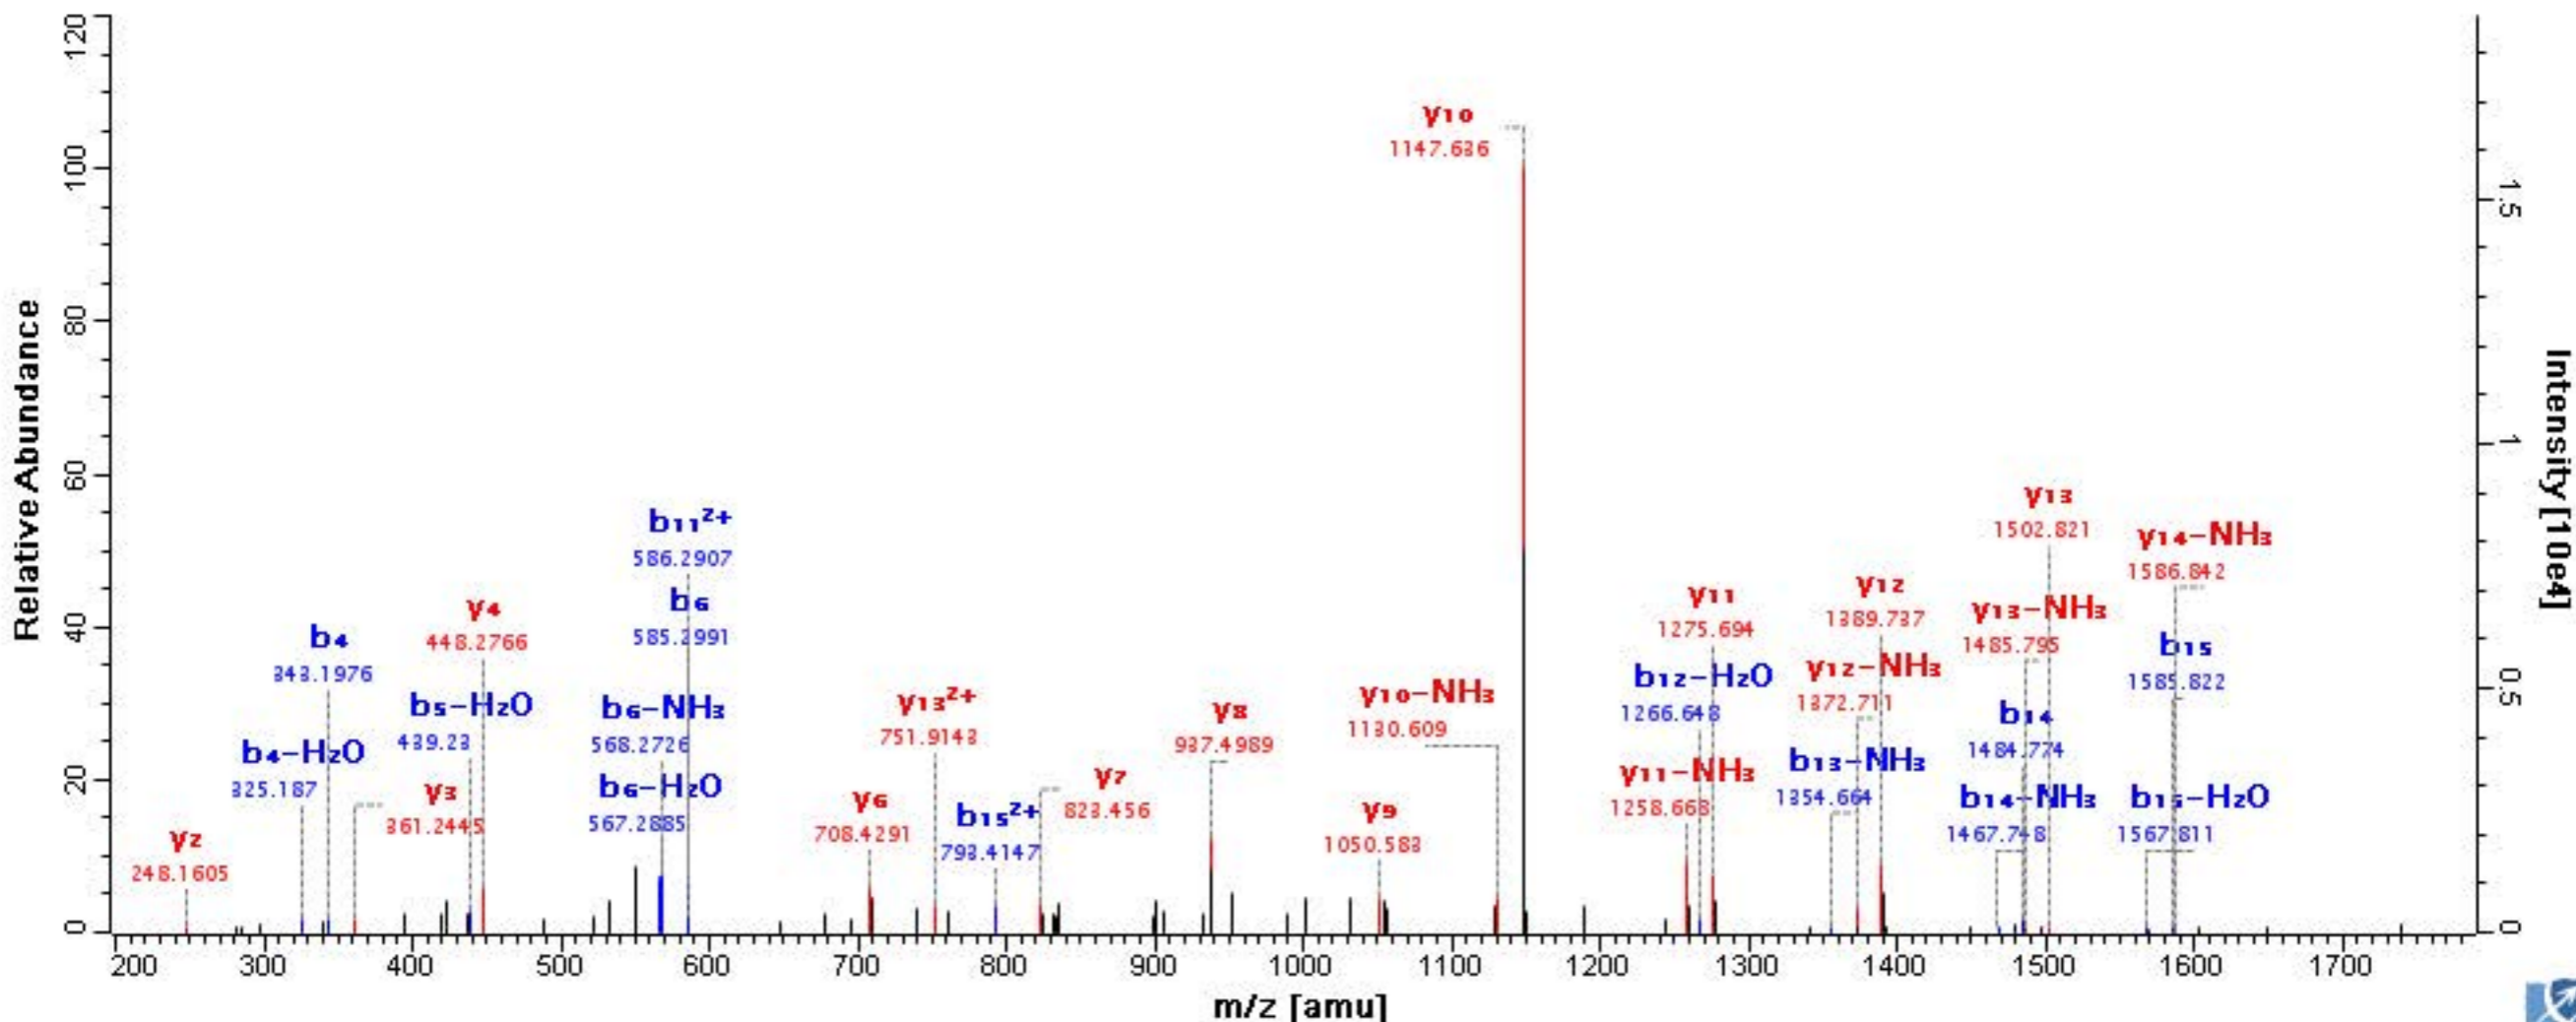

**precursor information**

|                   |                     |
|-------------------|---------------------|
| Mass:             | 1730.92086          |
| m/z:              | System.Collections. |
| Charge:           | System.Collections. |
| Retentiontime:    | System.Collections. |
| Score:            | 161.2056            |
| Mass Error [ppm]: | 0.32562             |
| PEP:              | 4.6573E-44          |
| Precursor Type:   | MULTI               |

| b <sup>2+</sup> ion |          | b ion     |          |    |     |    | y ion    |           | y <sup>2+</sup> ion |           |
|---------------------|----------|-----------|----------|----|-----|----|----------|-----------|---------------------|-----------|
| Δ dalton            | mass     | Δ dalton  | mass     |    | seq |    | Δ dalton | mass      | Δ dalton            | mass      |
|                     | 72.04439 |           | 72.04439 | 1  | A   | 15 |          |           |                     |           |
|                     | 129.0659 |           | 129.0659 | 2  | G   | 14 | 1660.89  |           | 1660.89             |           |
|                     | 230.1135 |           | 230.1135 | 3  | T   | 13 | 1603.869 |           | 1603.869            |           |
|                     | 343.1976 | -0.005702 | 343.1976 | 4  | I   | 12 | 1502.821 | +0.174774 | 751.9143            | -0.195182 |
|                     | 457.2405 |           | 457.2405 | 5  | N   | 11 | 1389.737 | +0.044848 | 1389.737            |           |
|                     | 585.2991 | +0.157442 | 585.2991 | 6  | Q   | 10 | 1275.694 | +0.098762 | 1275.694            |           |
|                     | 682.3519 |           | 682.3519 | 7  | P   | 9  | 1147.636 | -0.007699 | 1147.636            |           |
|                     | 795.4359 |           | 795.4359 | 8  | I   | 8  | 1050.583 | +0.030782 | 1050.583            |           |
|                     | 909.4789 |           | 909.4789 | 9  | N   | 7  | 937.4989 | +0.031411 | 937.4989            |           |
|                     | 1024.506 |           | 1024.506 | 10 | D   | 6  | 823.456  | +0.075071 | 823.456             |           |
| +0.022182           | 586.2907 |           | 1171.574 | 11 | F   | 5  | 708.4291 | -0.01615  | 708.4291            |           |
|                     | 1284.658 |           | 1284.658 | 12 | I   | 4  | 561.3606 |           | 561.3606            |           |
|                     | 1371.69  |           | 1371.69  | 13 | S   | 3  | 448.2766 | +0.010229 | 448.2766            |           |
|                     | 1484.774 | +0.088789 | 1484.774 | 14 | I   | 2  | 361.2445 | +0.035971 | 361.2445            |           |
| -0.094045           | 793.4147 | +0.276096 | 1585.822 | 15 | T   | 1  | 248.1605 | +0.063791 | 248.1605            |           |
|                     |          |           |          | 16 | K   | 0  | 147.1128 |           | 147.1128            |           |

**general information**

|                       |           |
|-----------------------|-----------|
| Annotation:           | 13 of 16  |
| AminoAcids Coverag    | 81 %      |
| Intensity Coverage:   | 53 %      |
| Protein Localisation: | 29 ... 44 |



Source: 20130209\_VR\_Bsu\_TripleSILAC\_WTPPrkCPrpCReplicate3\_OG\_F06  
 Scannumber: 9863  
 Protein: BSU05640; ydgG  
 Peptide Score: 98.05  
 Method: ITMS; CID; 3

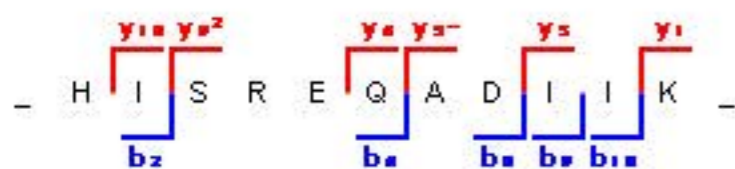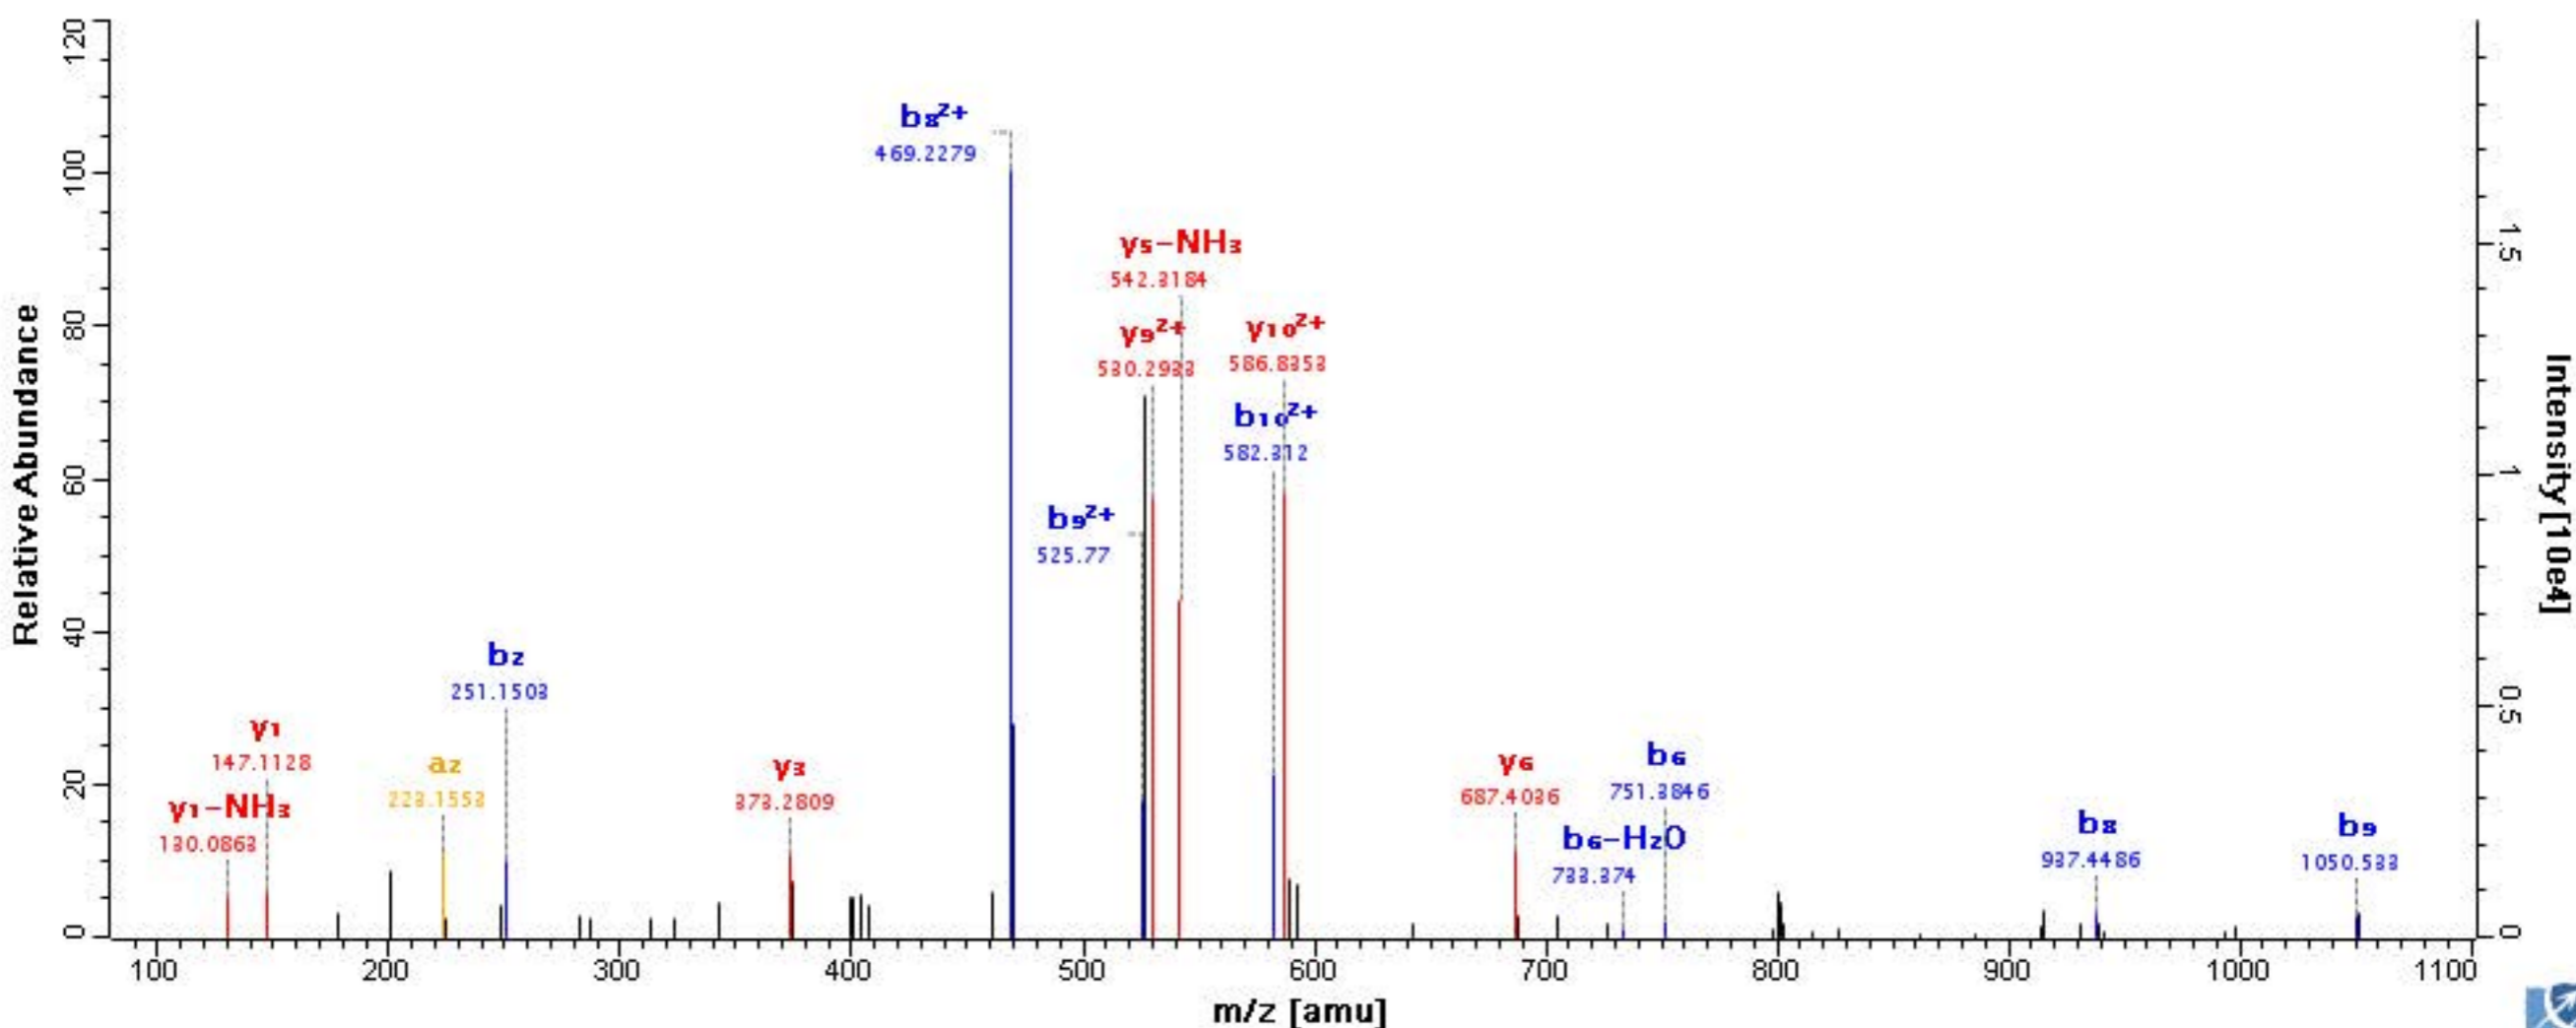

#### precursor information

|                   |                     |
|-------------------|---------------------|
| Mass:             | 1308.71588          |
| m/z:              | System.Collections. |
| Charge:           | System.Collections. |
| Retentiontime:    | System.Collections. |
| Score:            | 98.04827            |
| Mass Error [ppm]: | 0.6766              |
| PEP:              | 0.00073012          |
| Precursor Type:   | MULTI               |

#### general information

|                       |           |
|-----------------------|-----------|
| Annotation:           | 8 of 11   |
| AminoAcids Coverage:  | 73 %      |
| Intensity Coverage:   | 61 %      |
| Protein Localisation: | 35 ... 45 |

| a ion    |         | b <sup>2+</sup> ion |         | b ion    |         |    |     |    | y ion    |          | y <sup>2+</sup> ion |          |
|----------|---------|---------------------|---------|----------|---------|----|-----|----|----------|----------|---------------------|----------|
| Δ dalton | mass    | Δ dalton            | mass    | Δ dalton | mass    |    | seq |    | Δ dalton | mass     | Δ dalton            | mass     |
|          | 110.071 |                     | 138.066 |          | 138.066 | 1  | H   | 10 |          |          |                     |          |
| +0.04158 | 223.155 |                     | 251.15  | -0.0314  | 251.15  | 2  | I   | 9  | 1172.66  |          | 586.835             | +0.22193 |
|          | 310.187 |                     | 338.182 |          | 338.182 | 3  | S   | 8  | 1059.58  |          | 530.293             | +0.21239 |
|          | 466.288 |                     | 494.283 |          | 494.283 | 4  | R   | 7  | 972.547  |          | 972.547             |          |
|          | 595.331 |                     | 623.326 |          | 623.326 | 5  | E   | 6  | 816.446  |          | 816.446             |          |
|          | 723.39  |                     | 751.385 | +0.45614 | 751.385 | 6  | Q   | 5  | 687.404  | -0.0638  | 687.404             |          |
|          | 794.427 |                     | 822.422 |          | 822.422 | 7  | A   | 4  | 559.345  |          | 559.345             |          |
|          | 909.454 | +0.08074            | 469.228 | +0.27453 | 937.449 | 8  | D   | 3  | 488.308  |          | 488.308             |          |
|          | 1022.54 | -0.1698             | 525.77  | +0.12418 | 1050.53 | 9  | I   | 2  | 373.281  | +0.00599 | 373.281             |          |
|          | 1135.62 | +0.2345             | 582.312 |          | 1163.62 | 10 | I   | 1  | 260.197  |          | 260.197             |          |
|          |         |                     |         |          |         | 11 | K   | 0  | 147.113  | +0.07096 | 147.113             |          |

Source: 20130209\_VR\_Bsu\_TripleSILAC\_WTPrkCPrpCReplicate3\_OG\_F07  
 Scannumber: 10911  
 Protein: BSU25370; yqfB  
 Peptide Score: 93.55  
 Method: ITMS; CID; 3

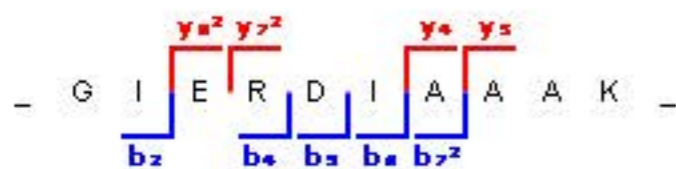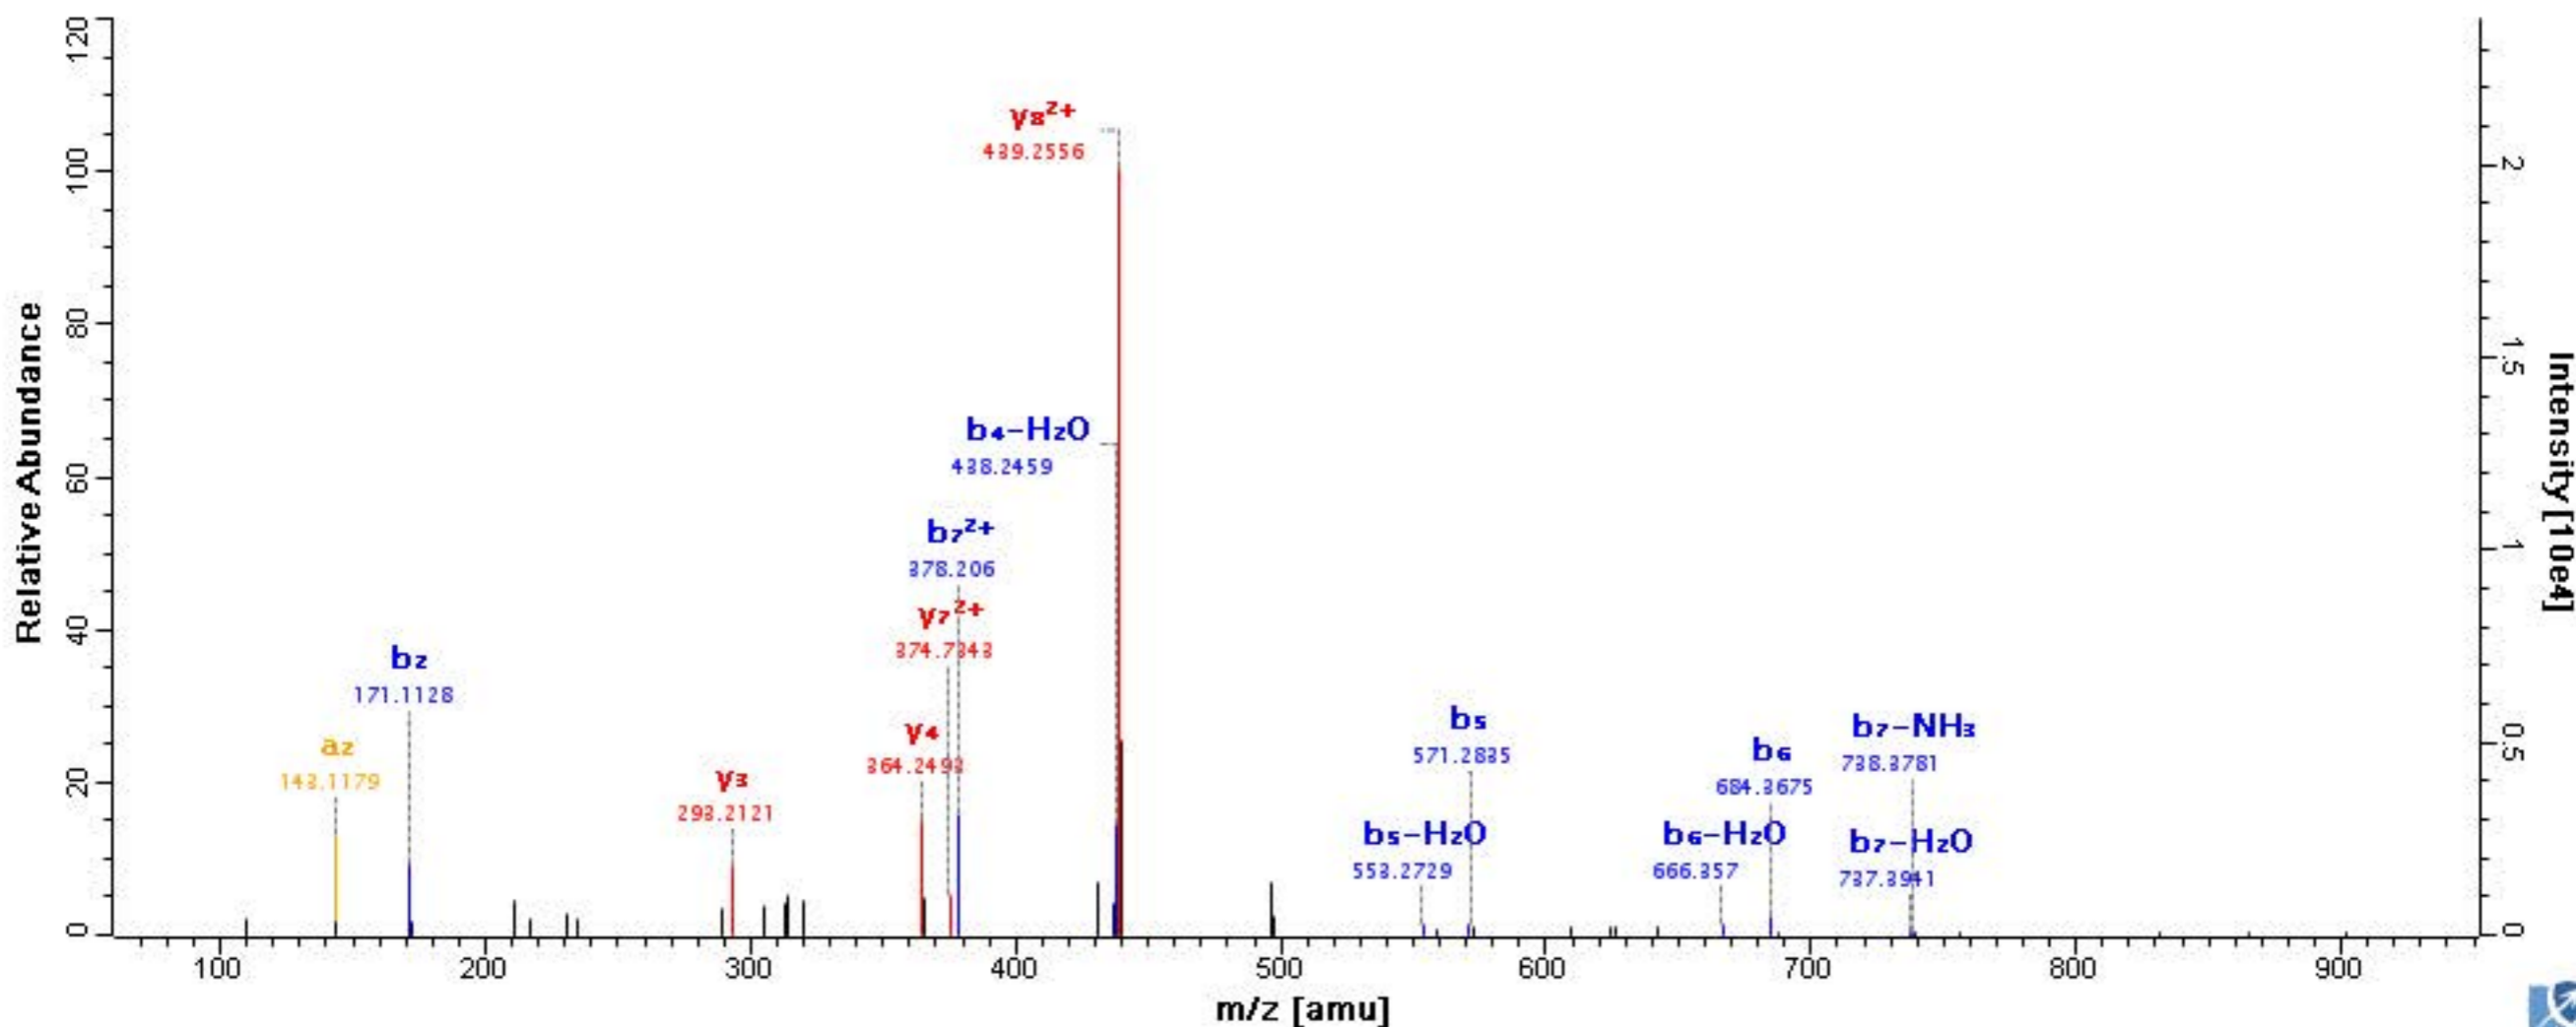

#### precursor information

|                   |                     |
|-------------------|---------------------|
| Mass:             | 1042.57709          |
| m/z:              | System.Collections. |
| Charge:           | System.Collections. |
| Retentiontime:    | System.Collections. |
| Score:            | 93.55083            |
| Mass Error [ppm]: | -0.018594           |
| PEP:              | 0.0013336           |
| Precursor Type:   | MULTI               |

#### general information

|                       |           |
|-----------------------|-----------|
| Annotation:           | 7 of 10   |
| AminoAcids Coverage:  | 70 %      |
| Intensity Coverage:   | 66 %      |
| Protein Localisation: | 84 ... 93 |

| a ion    |         | b <sup>2+</sup> ion |         | b ion    |         |    |     | y ion |          | y <sup>2+</sup> ion |          |         |
|----------|---------|---------------------|---------|----------|---------|----|-----|-------|----------|---------------------|----------|---------|
| Δ dalton | mass    | Δ dalton            | mass    | Δ dalton | mass    |    | seq |       | Δ dalton | mass                | Δ dalton | mass    |
|          | 30.0338 |                     | 58.0287 |          | 58.0287 | 1  | G   | 9     |          |                     |          |         |
| -0.1236  | 143.118 |                     | 171.113 | -0.083   | 171.113 | 2  | I   | 8     | 990.588  |                     | 990.588  |         |
|          | 272.16  |                     | 300.155 |          | 300.155 | 3  | E   | 7     | 877.504  |                     | 439.256  | -0.0085 |
|          | 428.262 |                     | 456.257 |          | 456.257 | 4  | R   | 6     | 748.461  |                     | 374.734  | +0.3655 |
|          | 543.289 |                     | 571.283 | -0.0301  | 571.283 | 5  | D   | 5     | 592.36   |                     | 592.36   |         |
|          | 656.373 |                     | 684.368 | +0.3656  | 684.368 | 6  | I   | 4     | 477.333  |                     | 477.333  |         |
|          | 727.41  | +0.4079             | 378.206 |          | 755.405 | 7  | A   | 3     | 364.249  | +0.02049            | 364.249  |         |
|          | 798.447 |                     | 826.442 |          | 826.442 | 8  | A   | 2     | 293.212  | -0.0635             | 293.212  |         |
|          | 869.484 |                     | 897.479 |          | 897.479 | 9  | A   | 1     | 222.175  |                     | 222.175  |         |
|          |         |                     |         |          |         | 10 | K   | 0     | 151.138  |                     | 151.138  |         |

Source: 20130209\_VR\_Bsu\_TripleSILAC\_WTPrkCPrpCReplicate3\_OG\_F09  
 Scannumber: 18753  
 Protein: BSU11560; yjbl  
 Peptide Score: 110.39  
 Method: ITMS; CID; 3

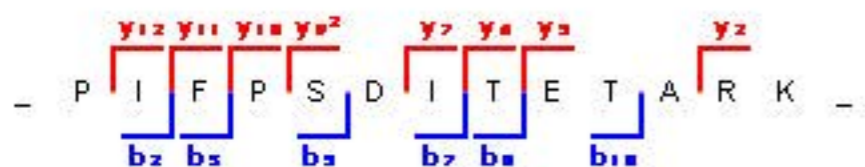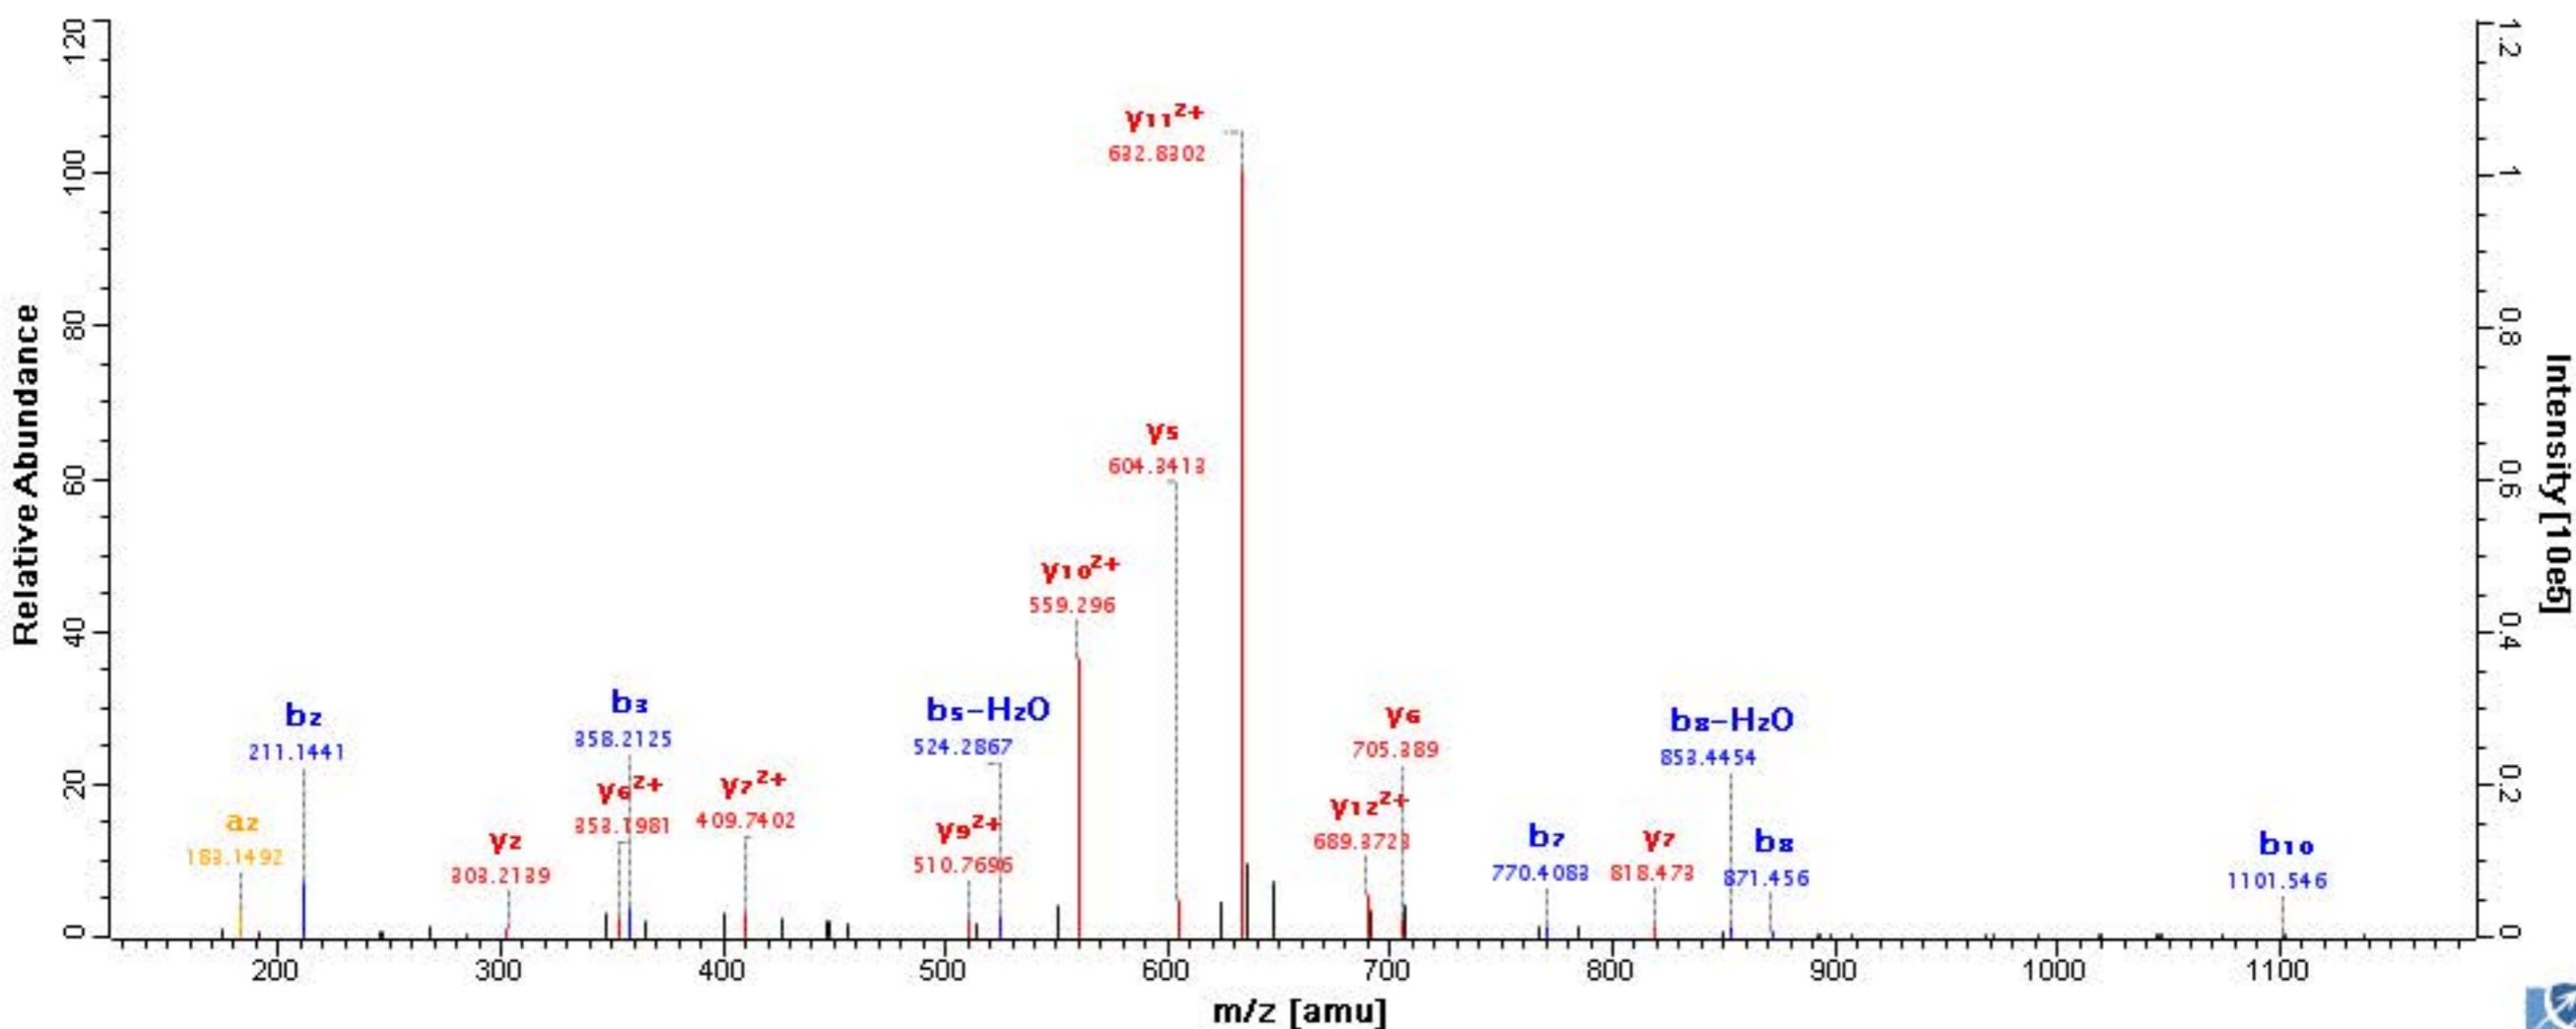

#### precursor information

|                   |                     |
|-------------------|---------------------|
| Mass:             | 1473.78294          |
| m/z:              | System.Collections. |
| Charge:           | System.Collections. |
| Retentiontime:    | System.Collections. |
| Score:            | 110.3872            |
| Mass Error [ppm]: | 0.13453             |
| PEP:              | 2.9445E-08          |
| Precursor Type:   | MULTI               |

#### general information

|                       |           |
|-----------------------|-----------|
| Annotation:           | 9 of 13   |
| AminoAcids Coverag    | 69 %      |
| Intensity Coverage:   | 72 %      |
| Protein Localisation: | 36 ... 48 |

| a ion    |          | b ion     |          | seq |   |    | y ion    |           | y <sup>2+</sup> ion |           |
|----------|----------|-----------|----------|-----|---|----|----------|-----------|---------------------|-----------|
| Δ dalton | mass     | Δ dalton  | mass     |     |   |    | Δ dalton | mass      | Δ dalton            | mass      |
|          | 70.06513 |           | 98.06004 | 1   | P | 12 |          |           |                     |           |
| -0.09879 | 183.1492 | -0.064545 | 211.1441 | 2   | I | 11 | 1377.737 |           | 689.3723            | +0.15172  |
|          | 330.2176 | -0.073602 | 358.2125 | 3   | F | 10 | 1264.653 |           | 632.8302            | +0.458645 |
|          | 427.2704 |           | 455.2653 | 4   | P | 9  | 1117.585 |           | 559.296             | +0.293023 |
|          | 514.3024 |           | 542.2973 | 5   | S | 8  | 1020.532 |           | 510.7696            | +0.06913  |
|          | 629.3293 |           | 657.3243 | 6   | D | 7  | 933.5    |           | 933.5               |           |
|          | 742.4134 | +0.129402 | 770.4083 | 7   | I | 6  | 818.473  | +0.242899 | 409.7402            | +0.043379 |
|          | 843.4611 | +0.225401 | 871.456  | 8   | T | 5  | 705.389  | +0.032103 | 353.1981            | -0.188118 |
|          | 972.5037 |           | 1000.499 | 9   | E | 4  | 604.3413 | +0.054146 | 604.3413            |           |
|          | 1073.551 | -0.167239 | 1101.546 | 10  | T | 3  | 475.2987 |           | 475.2987            |           |
|          | 1144.588 |           | 1172.583 | 11  | A | 2  | 374.251  |           | 374.251             |           |
|          | 1300.69  |           | 1328.684 | 12  | R | 1  | 303.2139 | -0.439593 | 303.2139            |           |
|          |          |           |          | 13  | K | 0  | 147.1128 |           | 147.1128            |           |

Source: 20130209\_VR\_Bsu\_TripleSILAC\_WTPPrkCPrpCReplicate3\_OG\_F09  
 Scannumber: 24395  
 Protein: BSU06280; ydjP  
 Peptide Score: 127.22  
 Method: ITMS; CID; 3

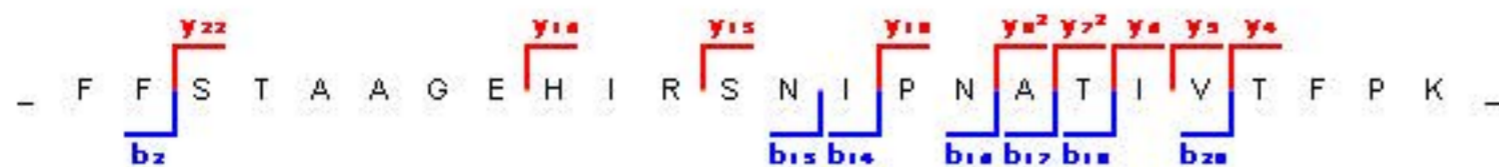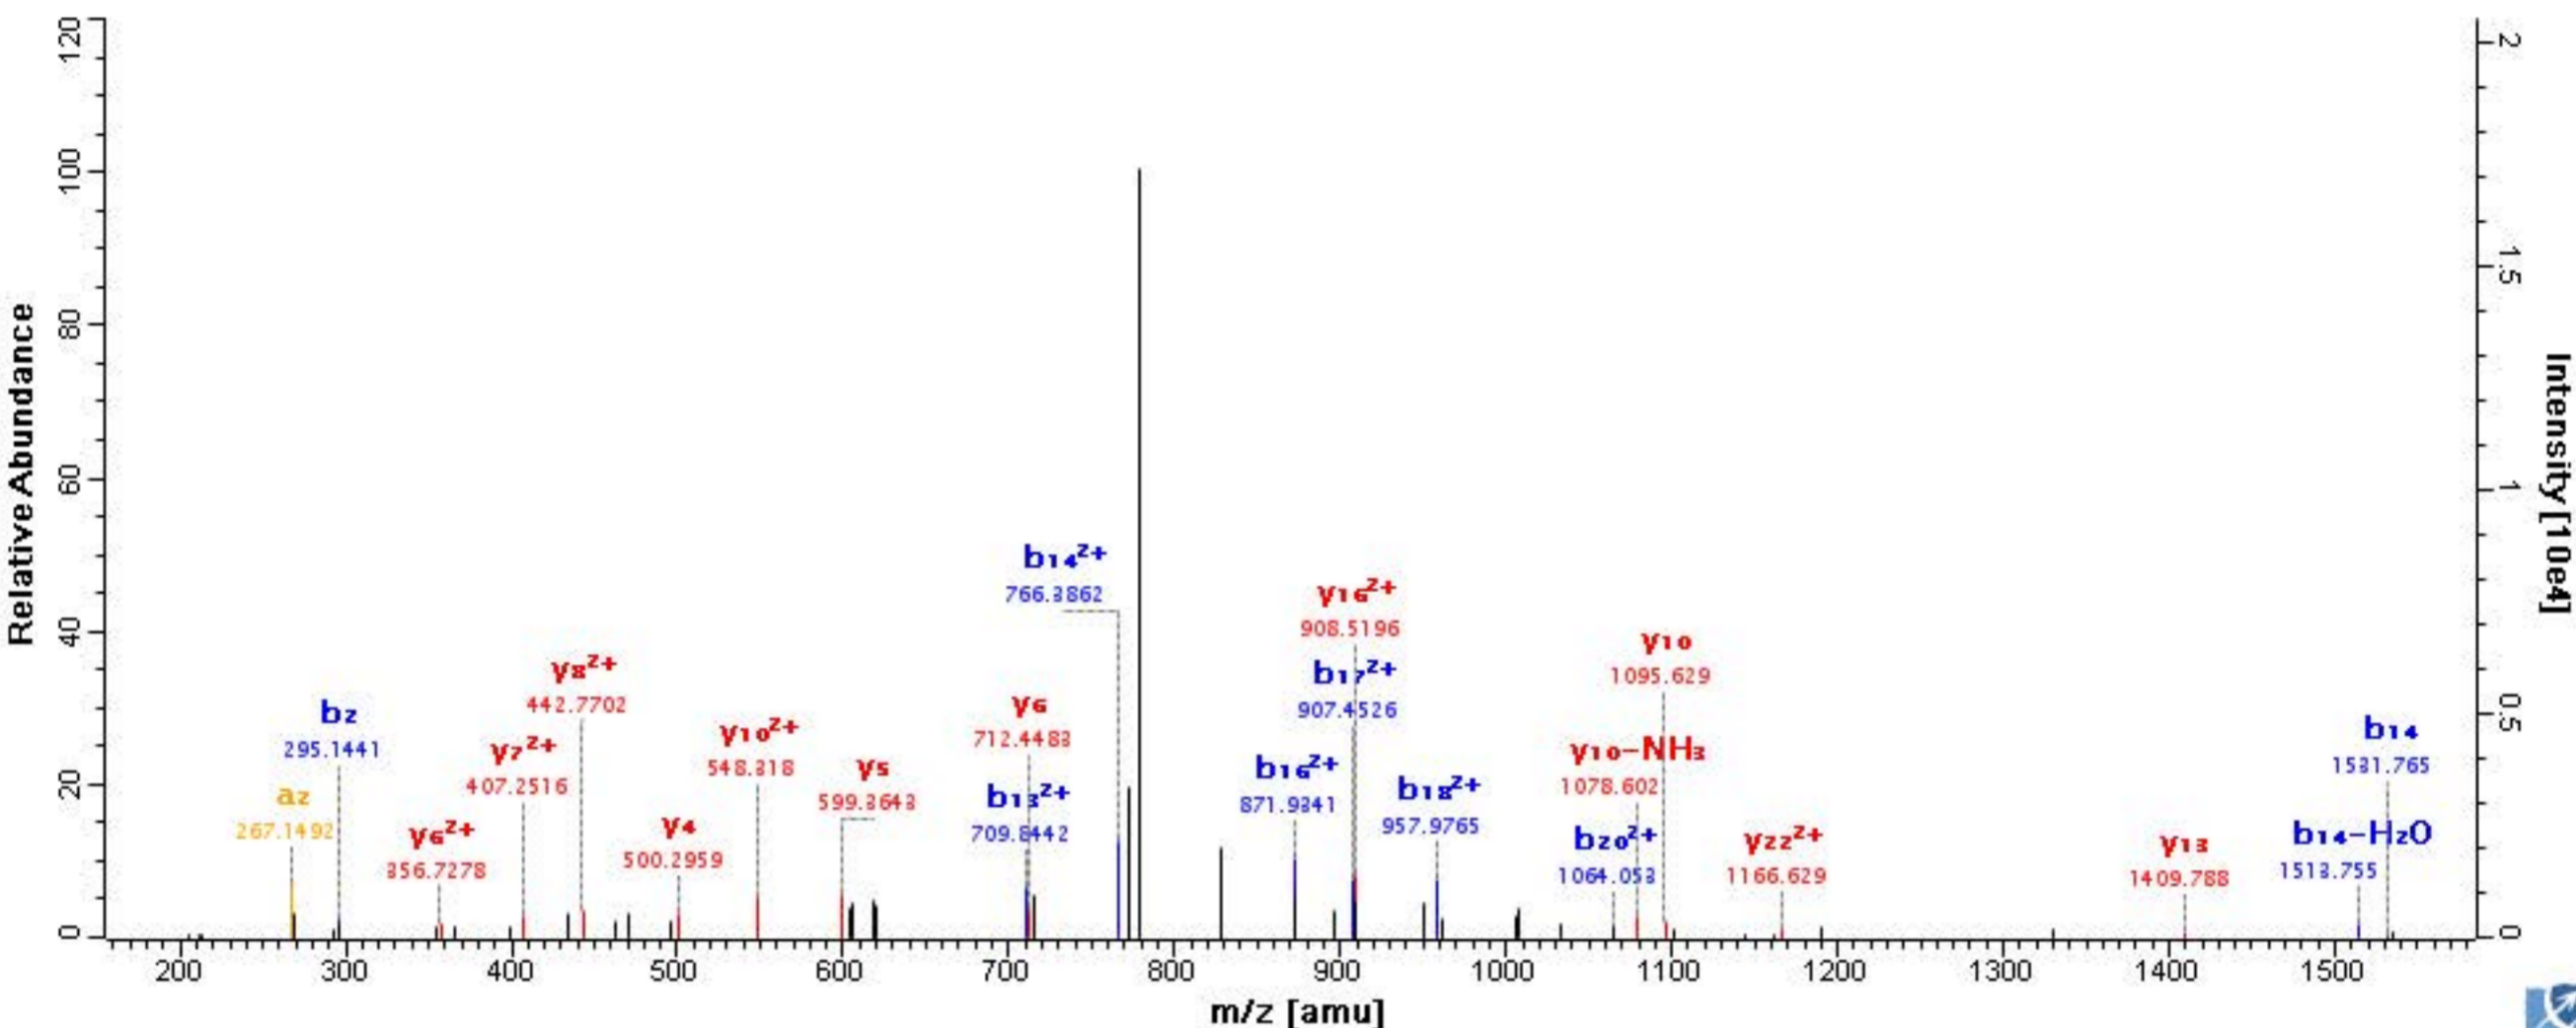

precursor information

|                   |                     |
|-------------------|---------------------|
| Mass:             | 2625.37783          |
| m/z:              | System.Collections. |
| Charge:           | System.Collections. |
| Retentiontime:    | System.Collections. |
| Score:            | 127.2172            |
| Mass Error [ppm]: | -0.62406            |
| PEP:              | 1.6802E-29          |
| Precursor Type:   | ISO                 |

| a ion    |         | b <sup>2+</sup> ion |          | b ion    |         |    |     |    | γ ion    |          | γ <sup>2+</sup> ion |          |
|----------|---------|---------------------|----------|----------|---------|----|-----|----|----------|----------|---------------------|----------|
| Δ dalton | mass    | Δ dalton            | mass     | Δ dalton | mass    |    | seq |    | Δ dalton | mass     | Δ dalton            | mass     |
|          | 120.081 |                     | 148.076  |          | 148.076 | 1  | F   | 23 |          |          |                     |          |
| -0.0998  | 267.149 |                     | 295.144  | +0.08279 | 295.144 | 2  | F   | 22 | 2479.32  |          | 2479.32             |          |
|          | 354.181 |                     | 382.176  |          | 382.176 | 3  | S   | 21 | 2332.25  |          | 1166.63             | -0.0582  |
|          | 455.229 |                     | 483.224  |          | 483.224 | 4  | T   | 20 | 2245.22  |          | 2245.22             |          |
|          | 526.266 |                     | 554.261  |          | 554.261 | 5  | A   | 19 | 2144.17  |          | 2144.17             |          |
|          | 597.303 |                     | 625.298  |          | 625.298 | 6  | A   | 18 | 2073.13  |          | 2073.13             |          |
|          | 654.325 |                     | 682.32   |          | 682.32  | 7  | G   | 17 | 2002.1   |          | 2002.1              |          |
|          | 783.367 |                     | 811.362  |          | 811.362 | 8  | E   | 16 | 1945.07  |          | 1945.07             |          |
|          | 920.426 |                     | 948.421  |          | 948.421 | 9  | H   | 15 | 1816.03  |          | 908.52              | -0.2087  |
|          | 1033.51 |                     | 1061.51  |          | 1061.51 | 10 | I   | 14 | 1678.97  |          | 1678.97             |          |
|          | 1189.61 |                     | 1217.61  |          | 1217.61 | 11 | R   | 13 | 1565.89  |          | 1565.89             |          |
|          | 1276.64 |                     | 1304.64  |          | 1304.64 | 12 | S   | 12 | 1409.79  | +0.35266 | 1409.79             |          |
|          | 1390.69 | +0.10764            | 1409.844 |          | 1418.68 | 13 | N   | 11 | 1322.76  |          | 1322.76             |          |
|          | 1503.77 | +0.4284             | 766.386  | +0.03277 | 1531.77 | 14 | I   | 10 | 1208.71  |          | 1208.71             |          |
|          | 1600.82 |                     | 1628.82  |          | 1628.82 | 15 | P   | 9  | 1095.63  | +0.30868 | 1095.63             | +0.44776 |
|          | 1714.87 | +0.48388            | 1714.934 |          | 1742.86 | 16 | N   | 8  | 998.576  |          | 998.576             |          |
|          | 1785.9  | -0.0413             | 907.453  |          | 1813.9  | 17 | A   | 7  | 884.533  |          | 442.77              | +0.08868 |
|          | 1886.95 | +0.3893             | 957.976  |          | 1914.95 | 18 | T   | 6  | 813.496  |          | 407.252             | +0.03919 |
|          | 2000.03 |                     | 2028.03  |          | 2028.03 | 19 | I   | 5  | 712.448  | -0.0845  | 356.728             | +0.45249 |
|          | 2099.1  | +0.15993            | 1064.05  |          | 2127.1  | 20 | V   | 4  | 599.364  | +0.26311 | 599.364             |          |
|          | 2200.15 |                     | 2228.15  |          | 2228.15 | 21 | T   | 3  | 500.296  | -0.0457  | 500.296             |          |
|          | 2347.22 |                     | 2375.21  |          | 2375.21 | 22 | F   | 2  | 399.248  |          | 399.248             |          |
|          | 2444.27 |                     | 2472.27  |          | 2472.27 | 23 | P   | 1  | 252.18   |          | 252.18              |          |
|          |         |                     |          |          |         | 24 | K   | 0  | 155.127  |          | 155.127             |          |

general information

|                       |             |
|-----------------------|-------------|
| Annotation:           | 13 of 24    |
| AminoAcids Coverage:  | 54 %        |
| Intensity Coverage:   | 30 %        |
| Protein Localisation: | 220 ... 243 |

Source: 20130209\_VR\_Bsu\_TripleSILAC\_WTPrkCPrpCReplicate3\_OG\_F12  
 Scannumber: 21624  
 Protein: BSU38620; yxU  
 Peptide Score: 113.71  
 Method: ITMS; CID; 3

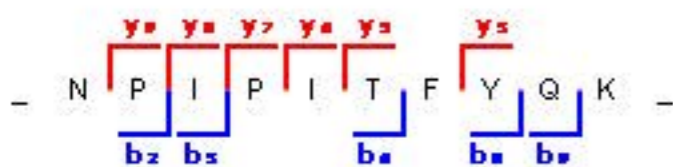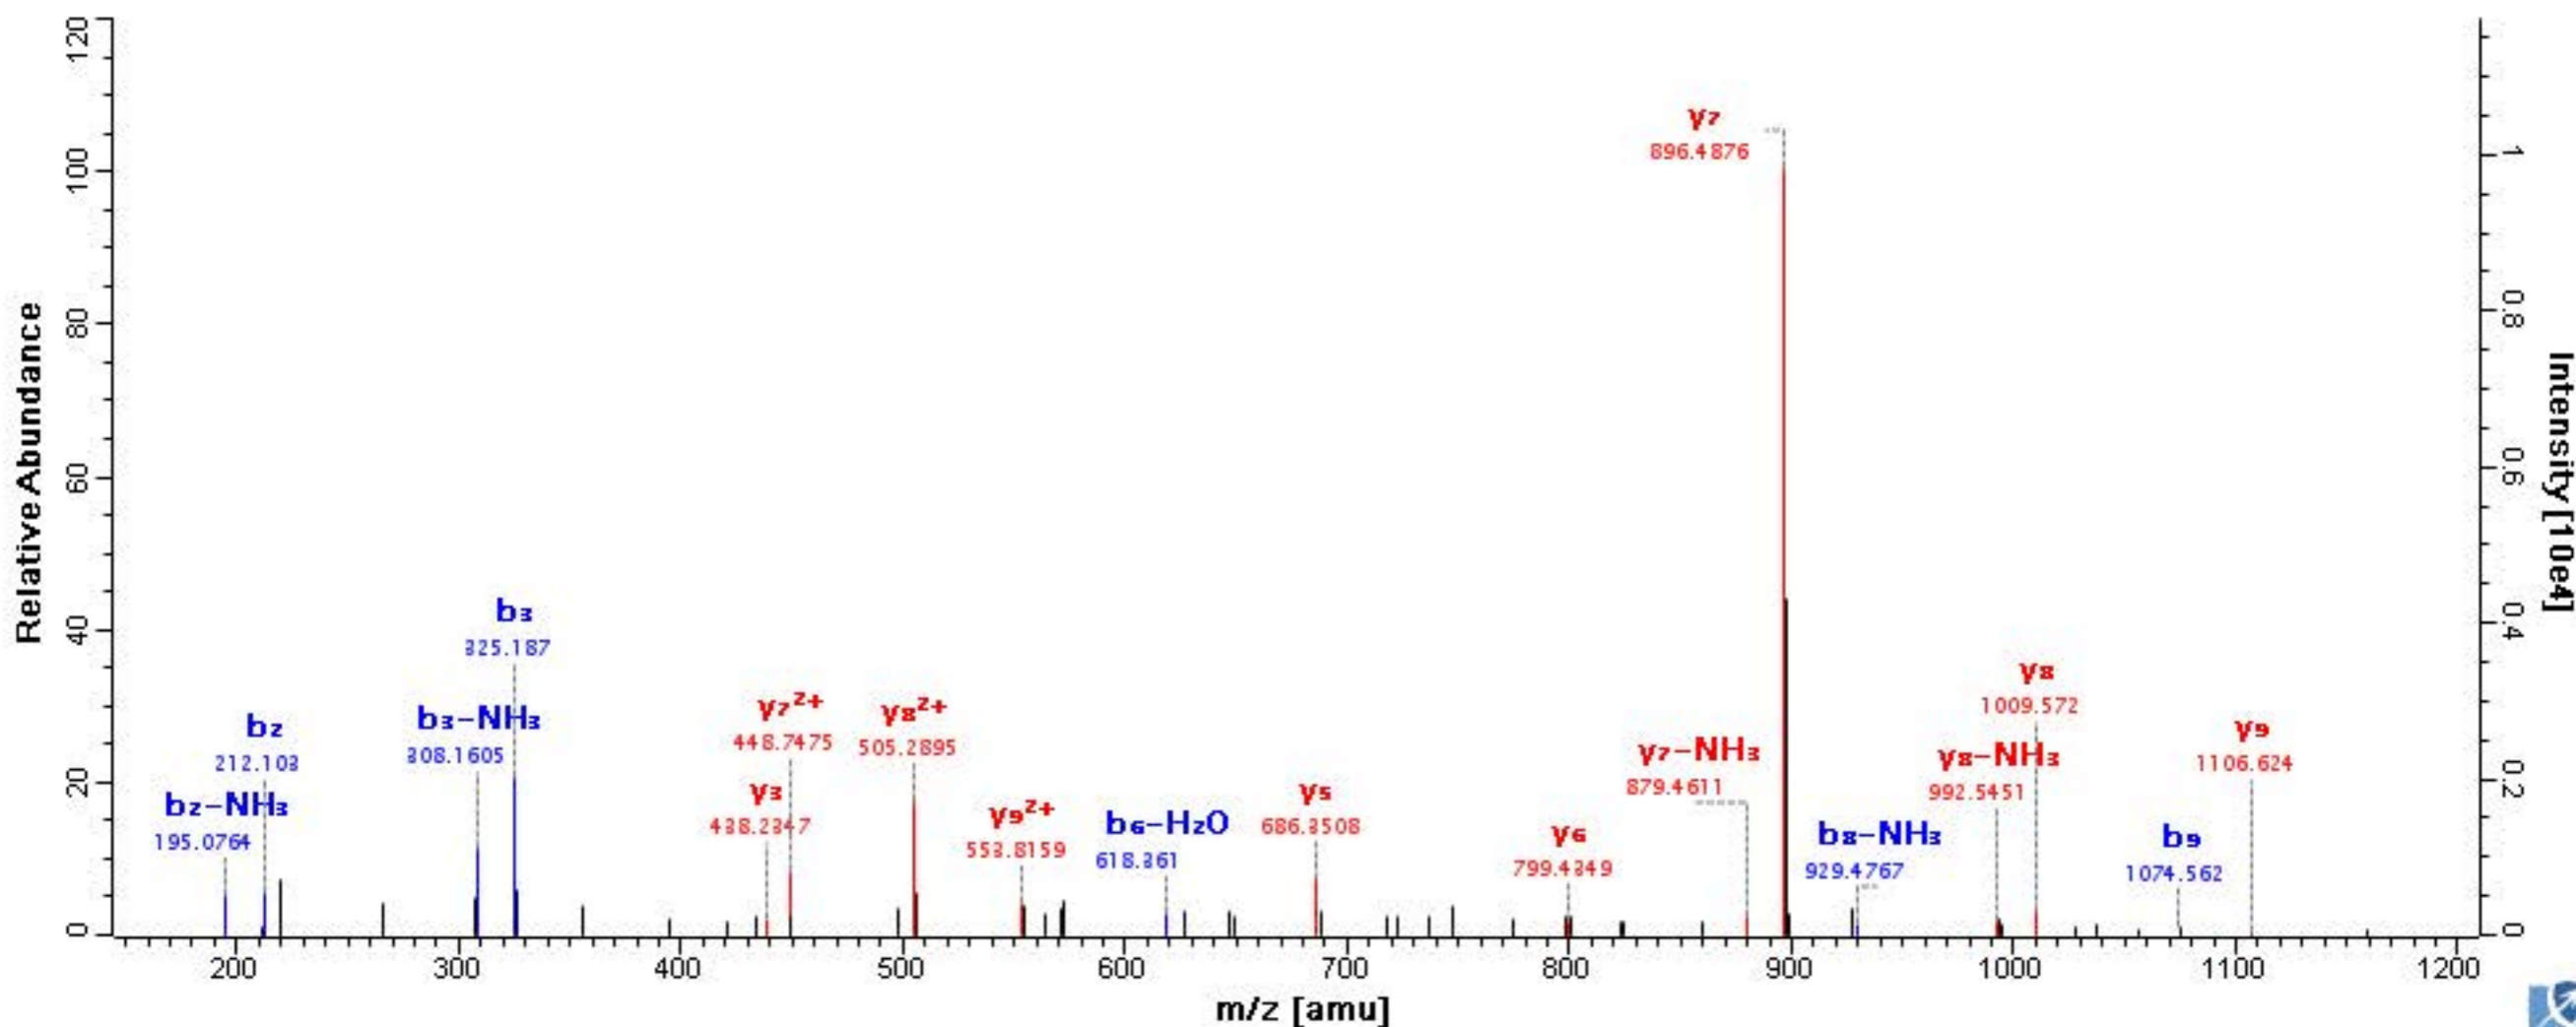

#### precursor information

|                   |                     |
|-------------------|---------------------|
| Mass:             | 1219.66008          |
| m/z:              | System.Collections. |
| Charge:           | System.Collections. |
| Retentiontime:    | System.Collections. |
| Score:            | 113.7065            |
| Mass Error [ppm]: | -0.020702           |
| PEP:              | 1.104E-06           |
| Precursor Type:   | MULTI               |

#### general information

|                       |          |
|-----------------------|----------|
| Annotation:           | 7 of 10  |
| AminoAcids Coverage:  | 70 %     |
| Intensity Coverage:   | 56 %     |
| Protein Localisation: | 6 ... 15 |

| b ion      |              |    |     |   | y ion        |            | y <sup>2+</sup> ion |            |
|------------|--------------|----|-----|---|--------------|------------|---------------------|------------|
| Δ dalton   | mass         |    | seq |   | Δ dalton     | mass       | Δ dalton            | mass       |
|            | 115.05020391 | 1  | N   | 9 |              |            |                     |            |
| +0.076674  | 212.10296777 | 2  | P   | 8 | 1106.6244583 | +0.1279831 | 553.81586737        | -0.1233625 |
| -0.0569658 | 325.18703175 | 3  | I   | 7 | 1009.5716944 | +0.1717138 | 505.28948545        | +0.0287519 |
|            | 422.2397956  | 4  | P   | 6 | 896.48763044 | +0.0541176 | 448.74745345        | +0.0677931 |
|            | 535.32385958 | 5  | I   | 5 | 799.43486659 | -0.1163851 | 799.43486659        |            |
|            | 636.37153805 | 6  | T   | 4 | 686.35080261 | -0.0690033 | 686.35080261        |            |
|            | 783.43995197 | 7  | F   | 3 | 585.30312414 |            | 585.30312414        |            |
|            | 946.50328051 | 8  | Y   | 2 | 438.23471022 | +0.1850896 | 438.23471022        |            |
| +0.1196605 | 1074.561858  | 9  | Q   | 1 | 275.17138168 |            | 275.17138168        |            |
|            |              | 10 | K   | 0 | 147.11280417 |            | 147.11280417        |            |

Source: 20130209\_VR\_Bsu\_TripleSILAC\_WTPkCPrpCReplicate3\_OG\_F12  
 Scannumber: 23540  
 Protein: BSU02300; ybfN  
 Peptide Score: 104.22  
 Method: ITMS; CID; 3

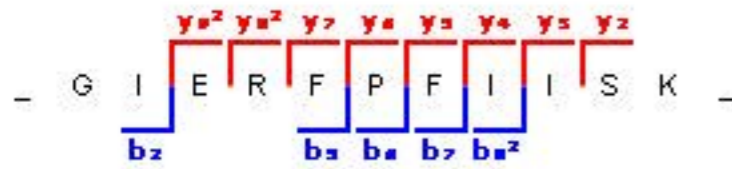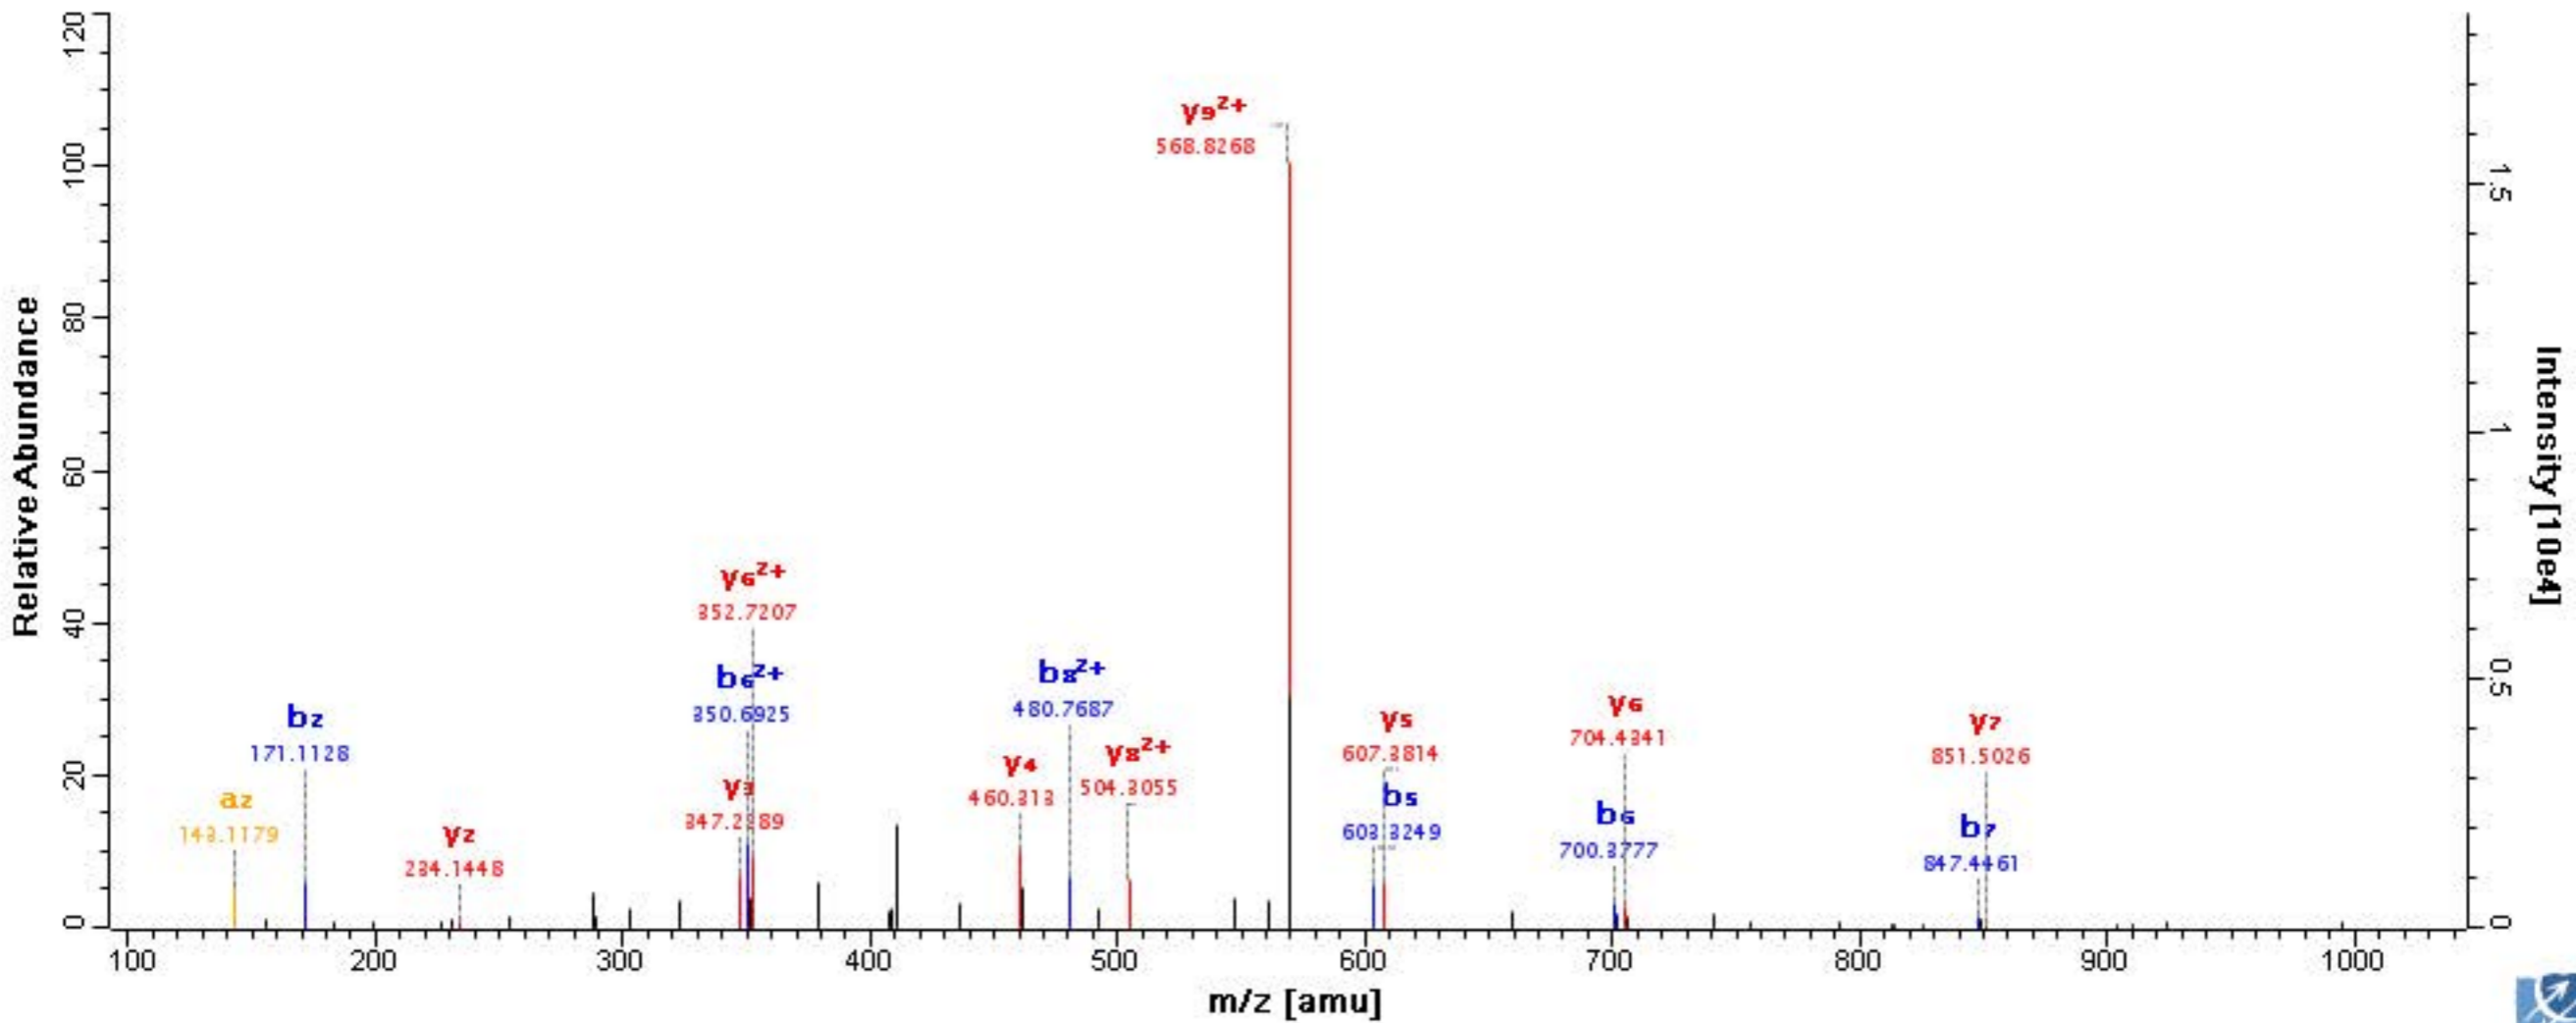

#### precursor information

|                   |                     |
|-------------------|---------------------|
| Mass:             | 1305.74392          |
| m/z:              | System.Collections. |
| Charge:           | System.Collections. |
| Retentiontime:    | System.Collections. |
| Score:            | 104.2215            |
| Mass Error [ppm]: | -0.44646            |
| PEP:              | 0.0013016           |
| Precursor Type:   | ISO                 |

#### general information

|                       |           |
|-----------------------|-----------|
| Annotation:           | 9 of 11   |
| AminoAcids Coverage:  | 82 %      |
| Intensity Coverage:   | 63 %      |
| Protein Localisation: | 53 ... 63 |

| a ion           |         | $b^{2+}$ ion    |         | b ion           |         |    |     |    | $\gamma$ ion    |          | $\gamma^{2+}$ ion |          |
|-----------------|---------|-----------------|---------|-----------------|---------|----|-----|----|-----------------|----------|-------------------|----------|
| $\Delta$ dalton | mass    | $\Delta$ dalton | mass    | $\Delta$ dalton | mass    |    | seq |    | $\Delta$ dalton | mass     | $\Delta$ dalton   | mass     |
|                 | 30.0338 |                 | 58.0287 |                 | 58.0287 | 1  | G   | 10 |                 |          |                   |          |
| +0.0502         | 143.118 |                 | 171.113 | +0.0673         | 171.113 | 2  | I   | 9  | 1249.73         |          | 1249.73           |          |
|                 | 272.16  |                 | 300.155 |                 | 300.155 | 3  | E   | 8  | 1136.65         |          | 568.827           | +0.17049 |
|                 | 428.262 |                 | 456.257 |                 | 456.257 | 4  | R   | 7  | 1007.6          |          | 504.305           | +0.41197 |
|                 | 575.33  |                 | 603.325 | +0.0922         | 603.325 | 5  | F   | 6  | 851.503         | -0.1551  | 851.503           |          |
|                 | 672.383 | +0.0061         | 350.692 | +0.3322         | 700.378 | 6  | P   | 5  | 704.434         | +0.21186 | 352.721           | +0.07659 |
|                 | 819.451 |                 | 847.446 | +0.2425         | 847.446 | 7  | F   | 4  | 607.381         | +0.06455 | 607.381           |          |
|                 | 932.535 | +0.13567        | 480.769 |                 | 960.53  | 8  | I   | 3  | 460.313         | +0.01709 | 460.313           |          |
|                 | 1045.62 |                 | 1073.61 |                 | 1073.61 | 9  | I   | 2  | 347.229         | +0.14085 | 347.229           |          |
|                 | 1132.65 |                 | 1160.65 |                 | 1160.65 | 10 | S   | 1  | 234.145         | -0.0531  | 234.145           |          |
|                 |         |                 |         |                 |         | 11 | K   | 0  | 147.113         |          | 147.113           |          |

Source: 20130210\_VR\_Bsu\_TripleSILAC\_pWTPPrkCPrpCReplicate3\_F03  
 Scannumber: 2244  
 Protein: BSU25550; rpsT; yqeO  
 Peptide Score: 218.75  
 Method: ITMS; CID; 3

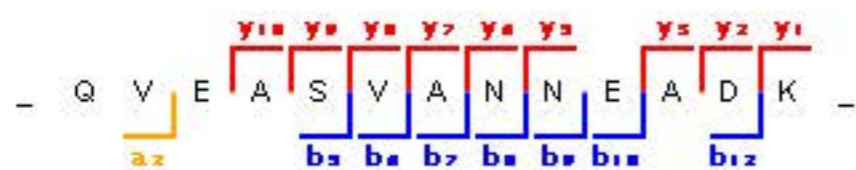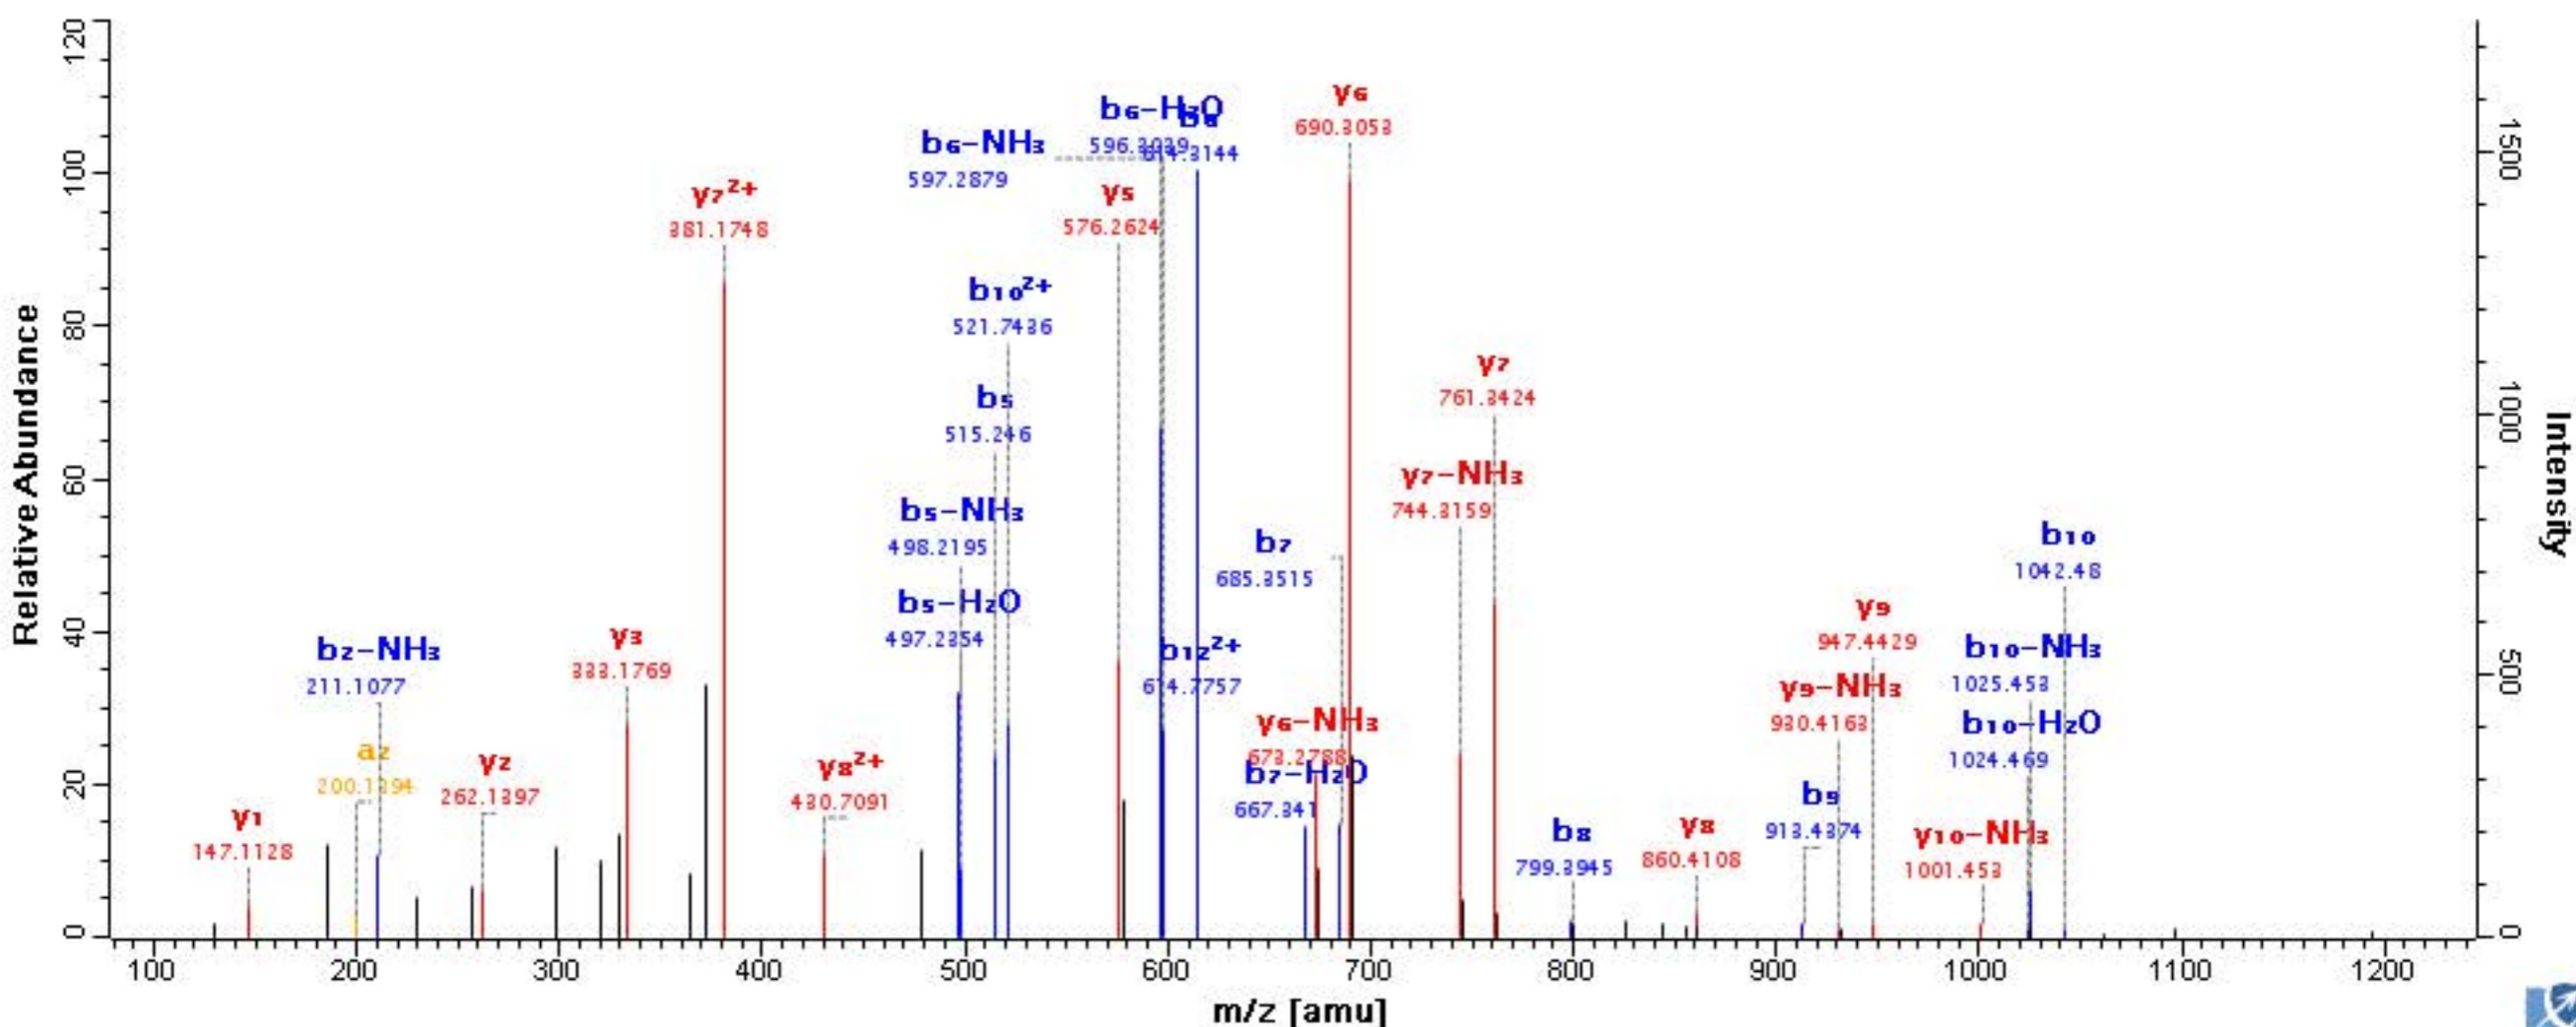

#### precursor information

|                   |                     |
|-------------------|---------------------|
| Mass:             | 1373.64208          |
| m/z:              | System.Collections. |
| Charge:           | System.Collections. |
| Retentiontime:    | System.Collections. |
| Score:            | 218.752             |
| Mass Error [ppm]: | -0.15364            |
| PEP:              | 2.7029E-72          |
| Precursor Type:   | MULTI               |

#### general information

|                       |           |
|-----------------------|-----------|
| Annotation:           | 11 of 13  |
| AminoAcids Coverage:  | 85 %      |
| Intensity Coverage:   | 79 %      |
| Protein Localisation: | 34 ... 46 |

| a ion    |         | b <sup>2+</sup> ion |          | b ion    |         |    |     | y ion |          | y <sup>2+</sup> ion |          |         |
|----------|---------|---------------------|----------|----------|---------|----|-----|-------|----------|---------------------|----------|---------|
| Δ dalton | mass    | Δ dalton            | mass     | Δ dalton | mass    |    | seq |       | Δ dalton | mass                | Δ dalton | mass    |
|          | 101.071 |                     | 129.066  |          | 129.066 | 1  | Q   | 12    |          |                     |          |         |
| -0.0635  | 200.139 |                     | 228.134  |          | 228.134 | 2  | V   | 11    | 1246.59  |                     | 1246.59  |         |
|          | 329.182 |                     | 357.177  |          | 357.177 | 3  | E   | 10    | 1147.52  |                     | 1147.52  |         |
|          | 400.219 |                     | 428.214  |          | 428.214 | 4  | A   | 9     | 1018.48  |                     | 1018.48  |         |
|          | 487.251 |                     | 515.246  | -0.1753  | 515.246 | 5  | S   | 8     | 947.443  | -0.1287             | 947.443  |         |
|          | 586.32  |                     | 614.314  | -0.0575  | 614.314 | 6  | V   | 7     | 860.411  | -0.0729             | 430.709  | -0.0664 |
|          | 657.357 |                     | 685.352  | -0.1992  | 685.352 | 7  | A   | 6     | 761.342  | -0.1427             | 381.175  | +0.0697 |
|          | 771.4   |                     | 799.394  | -0.1908  | 799.394 | 8  | N   | 5     | 690.305  | -0.0764             | 690.305  |         |
|          | 885.442 |                     | 913.437  | -0.372   | 913.437 | 9  | N   | 4     | 576.262  | -0.0315             | 576.262  |         |
|          | 1014.49 | +0.10256            | 1025.65  | -0.1174  | 1042.48 | 10 | E   | 3     | 462.219  |                     | 462.219  |         |
|          | 1085.52 |                     | 1113.52  |          | 1113.52 | 11 | A   | 2     | 333.177  | +0.01619            | 333.177  |         |
|          | 1200.55 | +0.37614            | 1514.776 |          | 1228.54 | 12 | D   | 1     | 262.14   | +0.07409            | 262.14   |         |
|          |         |                     |          |          |         | 13 | K   | 0     | 147.113  | -0.009              | 147.113  |         |

Source: 20130210\_VR\_Bsu\_TripleSILAC\_pWTPPrkCPrpCReplicate3\_F06  
 Scannumber: 2402  
 Protein: bgIC; BSU18130; egI5; gId  
 Peptide Score: 134.25  
 Method: ITMS; CID; 3

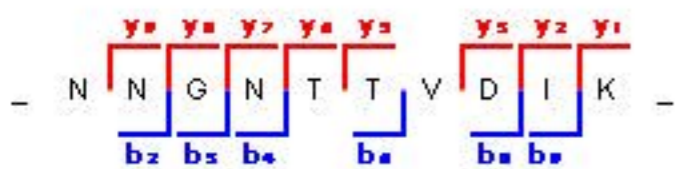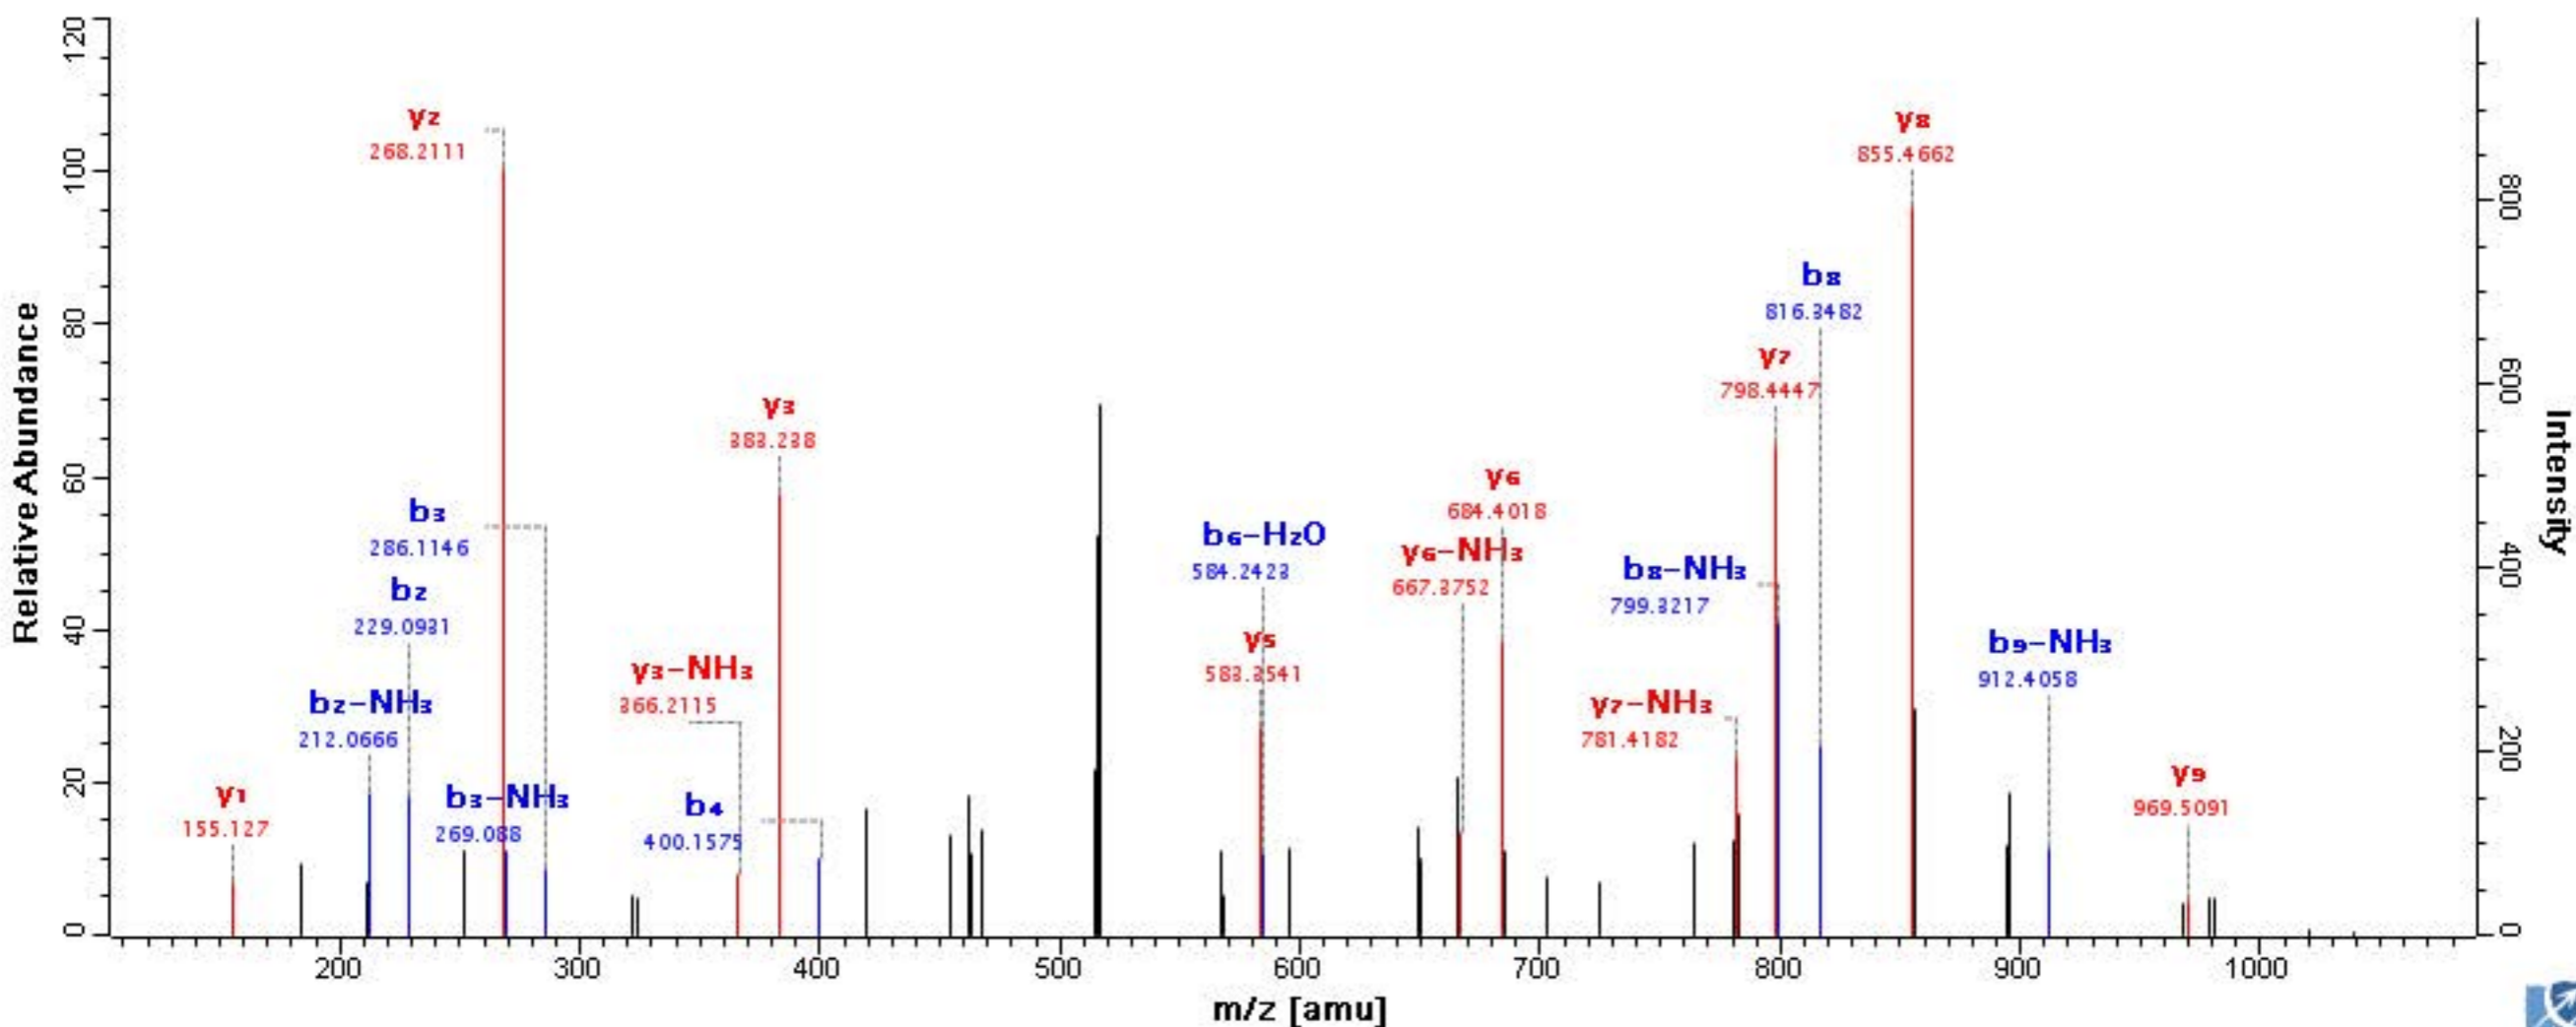

**precursor information**

|                   |                     |
|-------------------|---------------------|
| Mass:             | 1074.53052          |
| m/z:              | System.Collections. |
| Charge:           | System.Collections. |
| Retentiontime:    | System.Collections. |
| Score:            | 134.2468            |
| Mass Error [ppm]: | -0.026994           |
| PEP:              | 2.1321E-09          |
| Precursor Type:   | MULTI               |

**general information**

|                       |             |
|-----------------------|-------------|
| Annotation:           | 9 of 10     |
| AminoAcids Coverage:  | 90 %        |
| Intensity Coverage:   | 55 %        |
| Protein Localisation: | 378 ... 387 |

| b ion           |               |    |     |   |                 | y ion      |  |
|-----------------|---------------|----|-----|---|-----------------|------------|--|
| $\Delta$ dalton | mass          |    | seq |   | $\Delta$ dalton | mass       |  |
|                 | 115.050203914 | 1  | N   | 9 |                 |            |  |
| +0.0644004      | 229.093131361 | 2  | N   | 8 | 969.509099479   | +0.1188302 |  |
| +0.152861       | 286.114595085 | 3  | G   | 7 | 855.466172031   | -0.0944069 |  |
| -0.1051544      | 400.157522532 | 4  | N   | 6 | 798.444708308   | -0.1926941 |  |
|                 | 501.205201006 | 5  | T   | 5 | 684.401780861   | -0.1407945 |  |
|                 | 602.25287948  | 6  | T   | 4 | 583.354102386   | -0.1461556 |  |
|                 | 701.321293396 | 7  | V   | 3 | 482.306423912   |            |  |
| -0.0562442      | 816.348236428 | 8  | D   | 2 | 383.238009996   | -0.0812107 |  |
|                 | 929.432300409 | 9  | I   | 1 | 268.211066964   | -0.0486524 |  |
|                 |               | 10 | K   | 0 | 155.127002984   | -0.0326121 |  |



Source: 20130210\_VR\_Bsu\_TripleSILAC\_pWTPPrkCPrpCReplicate3\_F06  
 Scannumber: 5624  
 Protein: BSU07970; yfjT  
 Peptide Score: 138.54  
 Method: ITMS; CID; 3

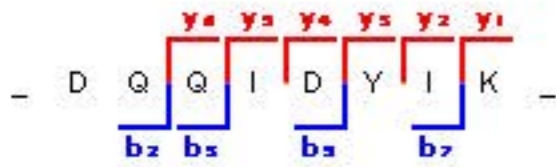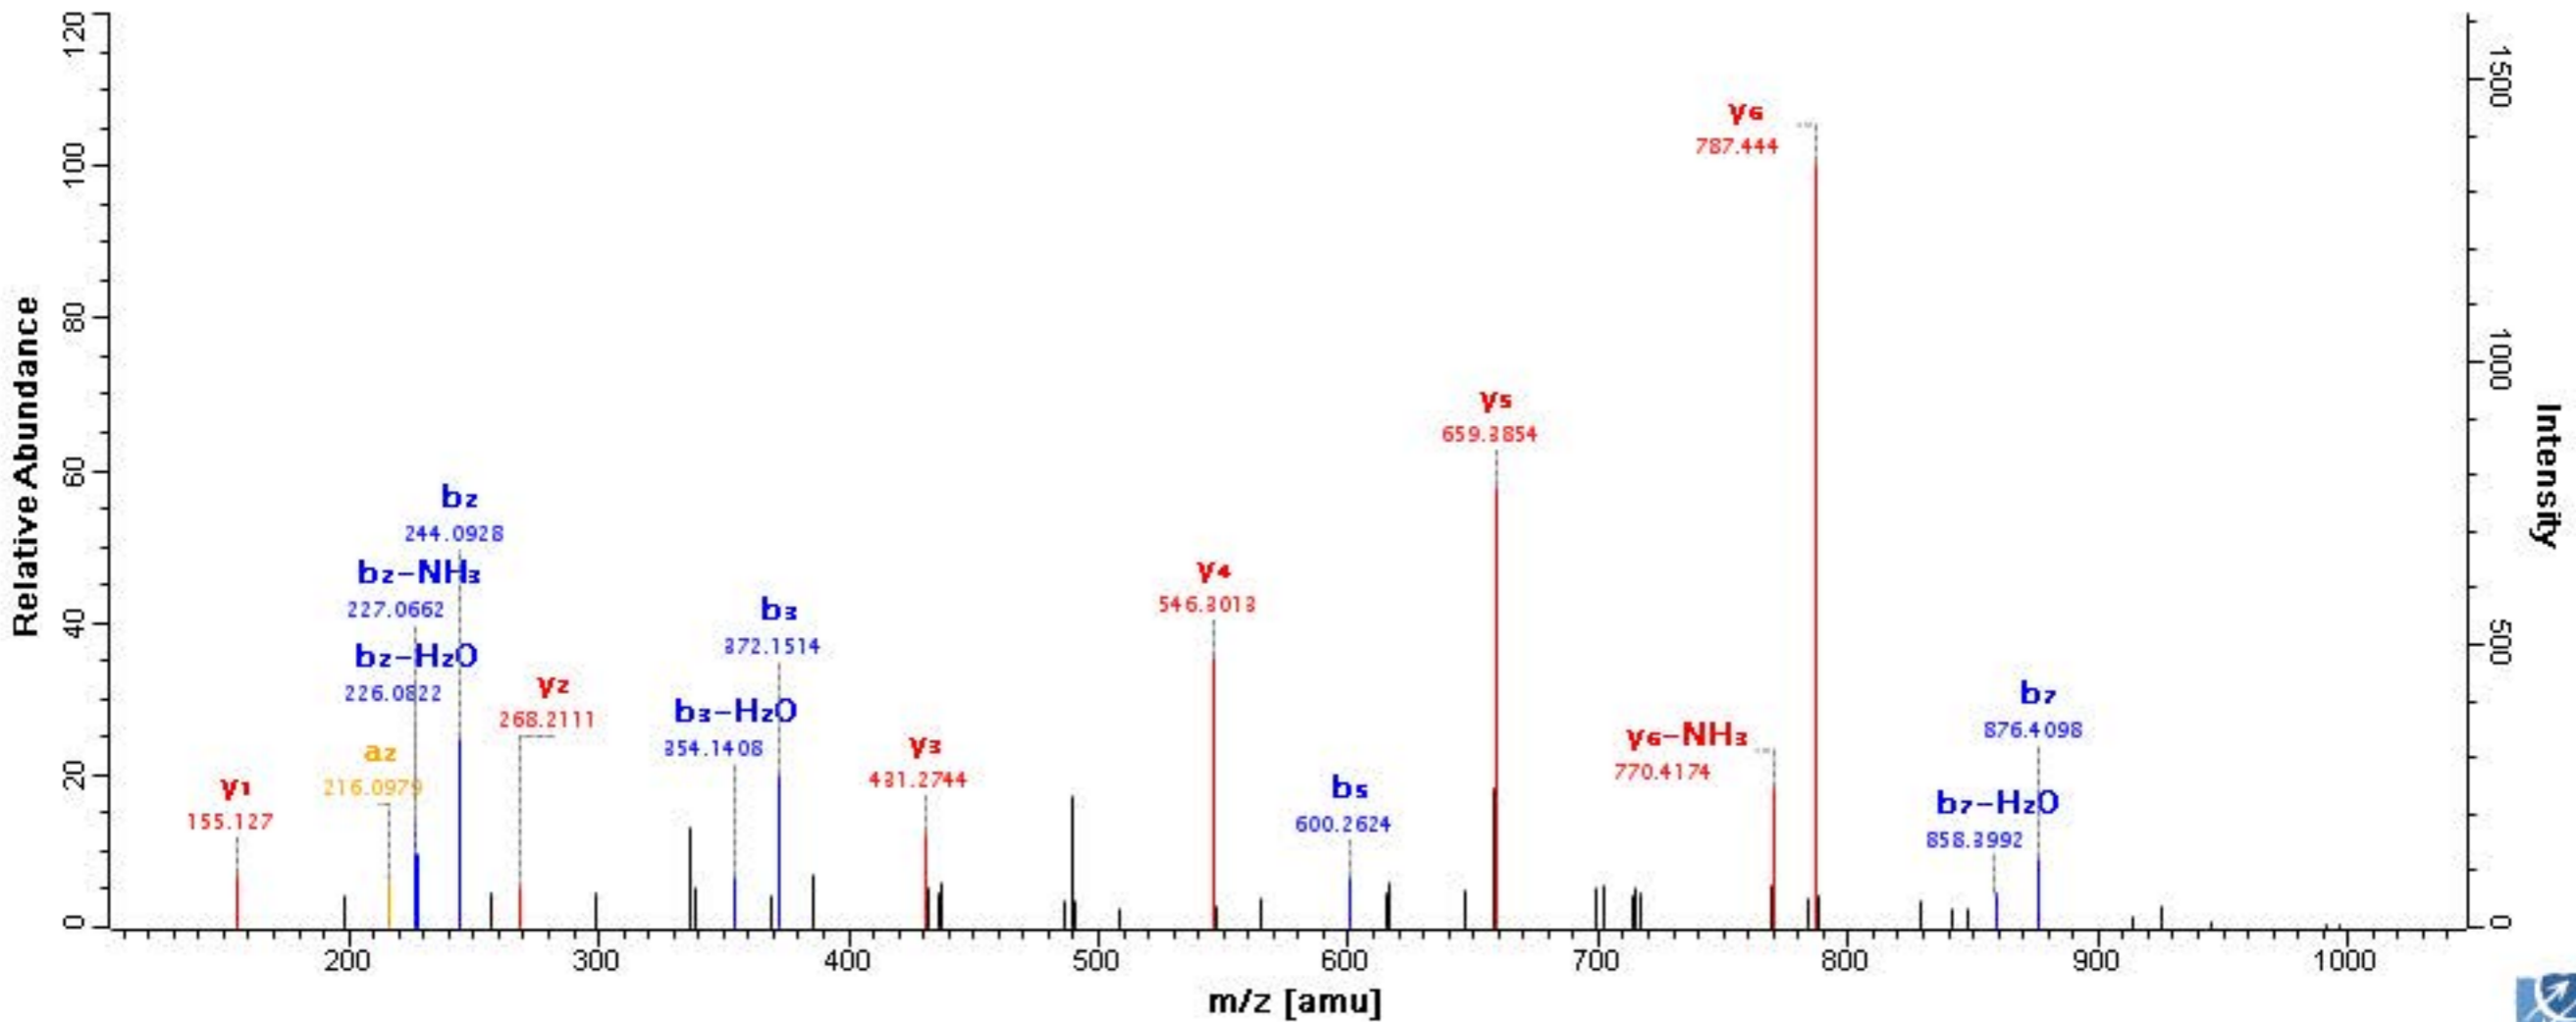

precursor information

|                       |                     |
|-----------------------|---------------------|
| Mass:                 | 1021.50799          |
| m/z:                  | System.Collections. |
| Charge:               | System.Collections. |
| Retentiontime:        | System.Collections. |
| Score:                | 138.5448            |
| Mass Error [ppm]:     | -0.031027           |
| g PEP:                | 3.0272E-07          |
| Annotation:           | 7 of 8              |
| AminoAcids Coverag    | 88 %                |
| Intensity Coverage:   | 65 %                |
| Protein Localisation: | 9 ... 16            |

| a ion     |              | b ion      |              |     | y ion    |      |
|-----------|--------------|------------|--------------|-----|----------|------|
| Δ dalton  | mass         | Δ dalton   | mass         | seq | Δ dalton | mass |
|           | 88.039304876 |            | 116.0342195  | 1   | D        | 7    |
| +0.005679 | 216.09788239 | -0.0347068 | 244.09279701 | 2   | Q        | 6    |
|           | 344.1564599  | +0.153313  | 372.15137452 | 3   | Q        | 5    |
|           | 457.24052388 |            | 485.2354385  | 4   | I        | 4    |
|           | 572.26746691 | +0.0789271 | 600.26238153 | 5   | D        | 3    |
|           | 735.33079545 |            | 763.32571007 | 6   | Y        | 2    |
|           | 848.41485943 | +0.0125282 | 876.40977405 | 7   | I        | 1    |
|           |              |            |              | 8   | K        | 0    |

Source: 20130211\_VR\_Bsu\_TripleSILAC\_WTPKPrpCReplicate3\_GeLC\_F13  
 Scannumber: 28666  
 Protein: BSU38720; yxkO  
 Peptide Score: 71.42  
 Method: ITMS; CID; 3

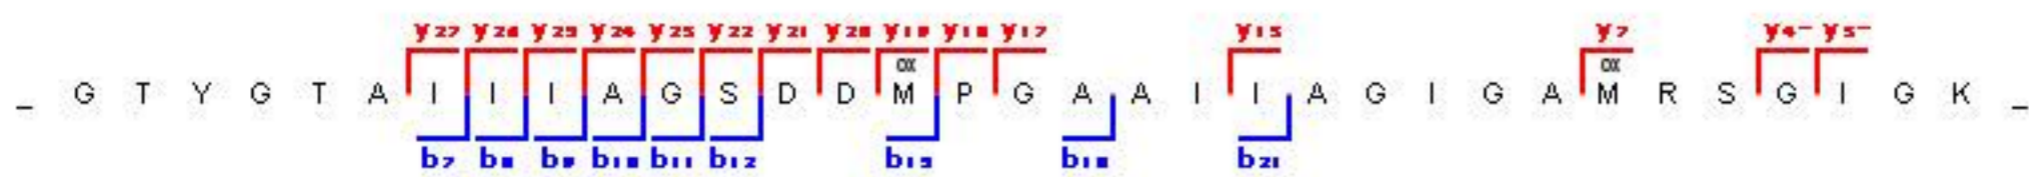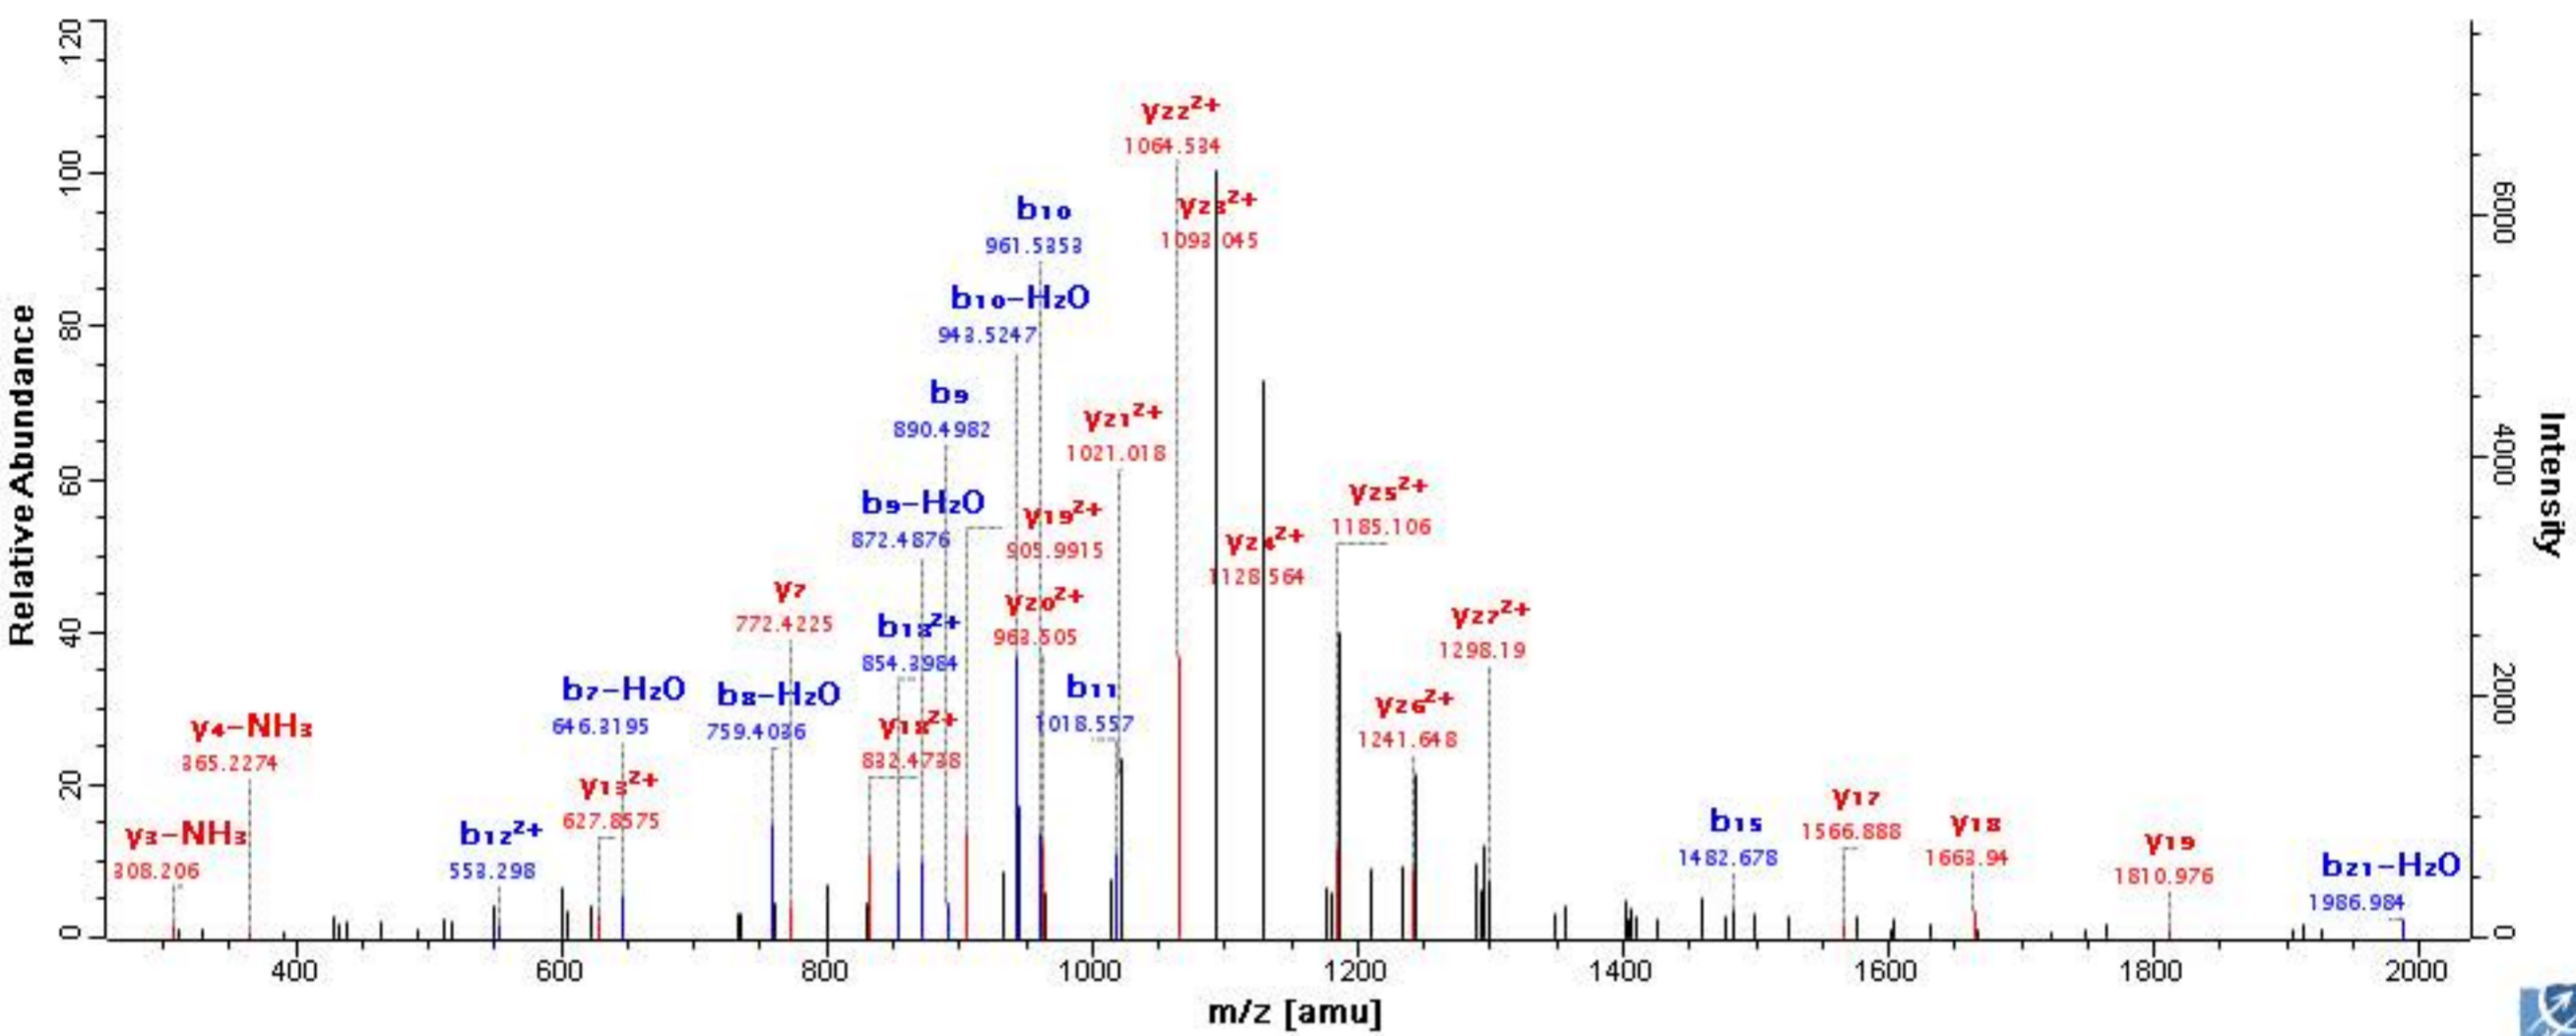

**precursor information**

|                   |                     |
|-------------------|---------------------|
| Mass:             | 3136.58862          |
| m/z:              | System.Collections. |
| Charge:           | System.Collections. |
| Retentiontime:    | System.Collections. |
| Score:            | 71.41802            |
| Mass Error [ppm]: | -0.33234            |
| PEP:              | 1.4846E-13          |
| Precursor Type:   | MULTI               |

| b <sup>2+</sup> ion |          | b ion     |          |    |     |    | γ ion    |           | γ <sup>2+</sup> ion |           |
|---------------------|----------|-----------|----------|----|-----|----|----------|-----------|---------------------|-----------|
| Δ dalton            | mass     | Δ dalton  | mass     |    | seq |    | Δ dalton | mass      | Δ dalton            | mass      |
|                     | 58.02874 |           | 58.02874 | 1  | G   | 32 |          |           |                     |           |
|                     | 159.0764 |           | 159.0764 | 2  | T   | 31 | 3088.59  |           | 3088.59             |           |
|                     | 322.1397 |           | 322.1397 | 3  | Y   | 30 | 2987.542 |           | 2987.542            |           |
|                     | 379.1612 |           | 379.1612 | 4  | G   | 29 | 2824.479 |           | 2824.479            |           |
|                     | 480.2089 |           | 480.2089 | 5  | T   | 28 | 2767.457 |           | 2767.457            |           |
|                     | 551.246  |           | 551.246  | 6  | A   | 27 | 2666.41  |           | 2666.41             |           |
|                     | 664.3301 |           | 664.3301 | 7  | I   | 26 | 2595.372 |           | 1298.19             | +0.335177 |
|                     | 777.4141 |           | 777.4141 | 8  | I   | 25 | 2482.288 |           | 1241.648            | +0.141491 |
|                     | 890.4982 | +0.125218 | 890.4982 | 9  | I   | 24 | 2369.204 |           | 1185.106            | +0.069632 |
|                     | 961.5353 | +0.084442 | 961.5353 | 10 | A   | 23 | 2256.12  |           | 1128.564            | +0.047455 |
|                     | 1018.557 | +0.446157 | 1018.557 | 11 | G   | 22 | 2185.083 |           | 1093.045            | +0.188448 |
| +0.35992            | 553.298  |           | 1105.589 | 12 | S   | 21 | 2128.062 |           | 1064.534            | +0.470542 |
|                     | 1220.616 |           | 1220.616 | 13 | D   | 20 | 2041.03  |           | 1021.018            | +0.148422 |
|                     | 1335.643 |           | 1335.643 | 14 | D   | 19 | 1926.003 |           | 963.505             | -0.115817 |
|                     | 1482.678 | -0.339952 | 1482.678 | 15 | M   | 18 | 1810.976 | +0.05698  | 905.9915            | +0.35432  |
|                     | 1579.731 |           | 1579.731 | 16 | P   | 17 | 1663.94  | +0.247409 | 832.4738            | +0.437083 |
|                     | 1636.752 |           | 1636.752 | 17 | G   | 16 | 1566.888 | +0.101931 | 1566.888            |           |
| +0.407556           | 854.3984 |           | 1707.789 | 18 | A   | 15 | 1509.866 |           | 1509.866            |           |
|                     | 1778.827 |           | 1778.827 | 19 | A   | 14 | 1438.829 |           | 1438.829            |           |
|                     | 1891.911 |           | 1891.911 | 20 | I   | 13 | 1367.792 |           | 1367.792            |           |
|                     | 2004.995 |           | 2004.995 | 21 | I   | 12 | 1254.708 |           | 627.8575            | +0.194273 |
|                     | 2076.032 |           | 2076.032 | 22 | A   | 11 | 1141.624 |           | 1141.624            |           |
|                     | 2133.053 |           | 2133.053 | 23 | G   | 10 | 1070.587 |           | 1070.587            |           |
|                     | 2246.137 |           | 2246.137 | 24 | I   | 9  | 1013.565 |           | 1013.565            |           |
|                     | 2303.159 |           | 2303.159 | 25 | G   | 8  | 900.4811 |           | 900.4811            |           |
|                     | 2374.196 |           | 2374.196 | 26 | A   | 7  | 843.4596 |           | 843.4596            |           |
|                     | 2521.231 |           | 2521.231 | 27 | M   | 6  | 772.4225 | +0.389112 | 772.4225            |           |
|                     | 2677.332 |           | 2677.332 | 28 | R   | 5  | 625.3871 |           | 625.3871            |           |
|                     | 2764.364 |           | 2764.364 | 29 | S   | 4  | 469.286  |           | 469.286             |           |
|                     | 2821.386 |           | 2821.386 | 30 | G   | 3  | 382.254  |           | 382.254             |           |
|                     | 2934.47  |           | 2934.47  | 31 | I   | 2  | 325.2325 |           | 325.2325            |           |
|                     | 2991.491 |           | 2991.491 | 32 | G   | 1  | 212.1485 |           | 212.1485            |           |
|                     |          |           |          | 33 | K   | 0  | 155.127  |           | 155.127             |           |

**general information**

|                       |           |
|-----------------------|-----------|
| Annotation:           | 16 of 33  |
| AminoAcids Coverage:  | 48 %      |
| Intensity Coverage:   | 42 %      |
| Protein Localisation: | 25 ... 57 |

Source: 20130211\_VR\_Bsu\_TripleSILAC\_WTPkCPrpCReplicate3\_GeLC\_F14  
 Scannumber: 19645  
 Protein: BSU11290; yjaV  
 Peptide Score: 113.77  
 Method: ITMS; CID; 3

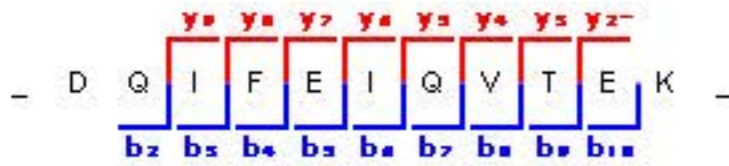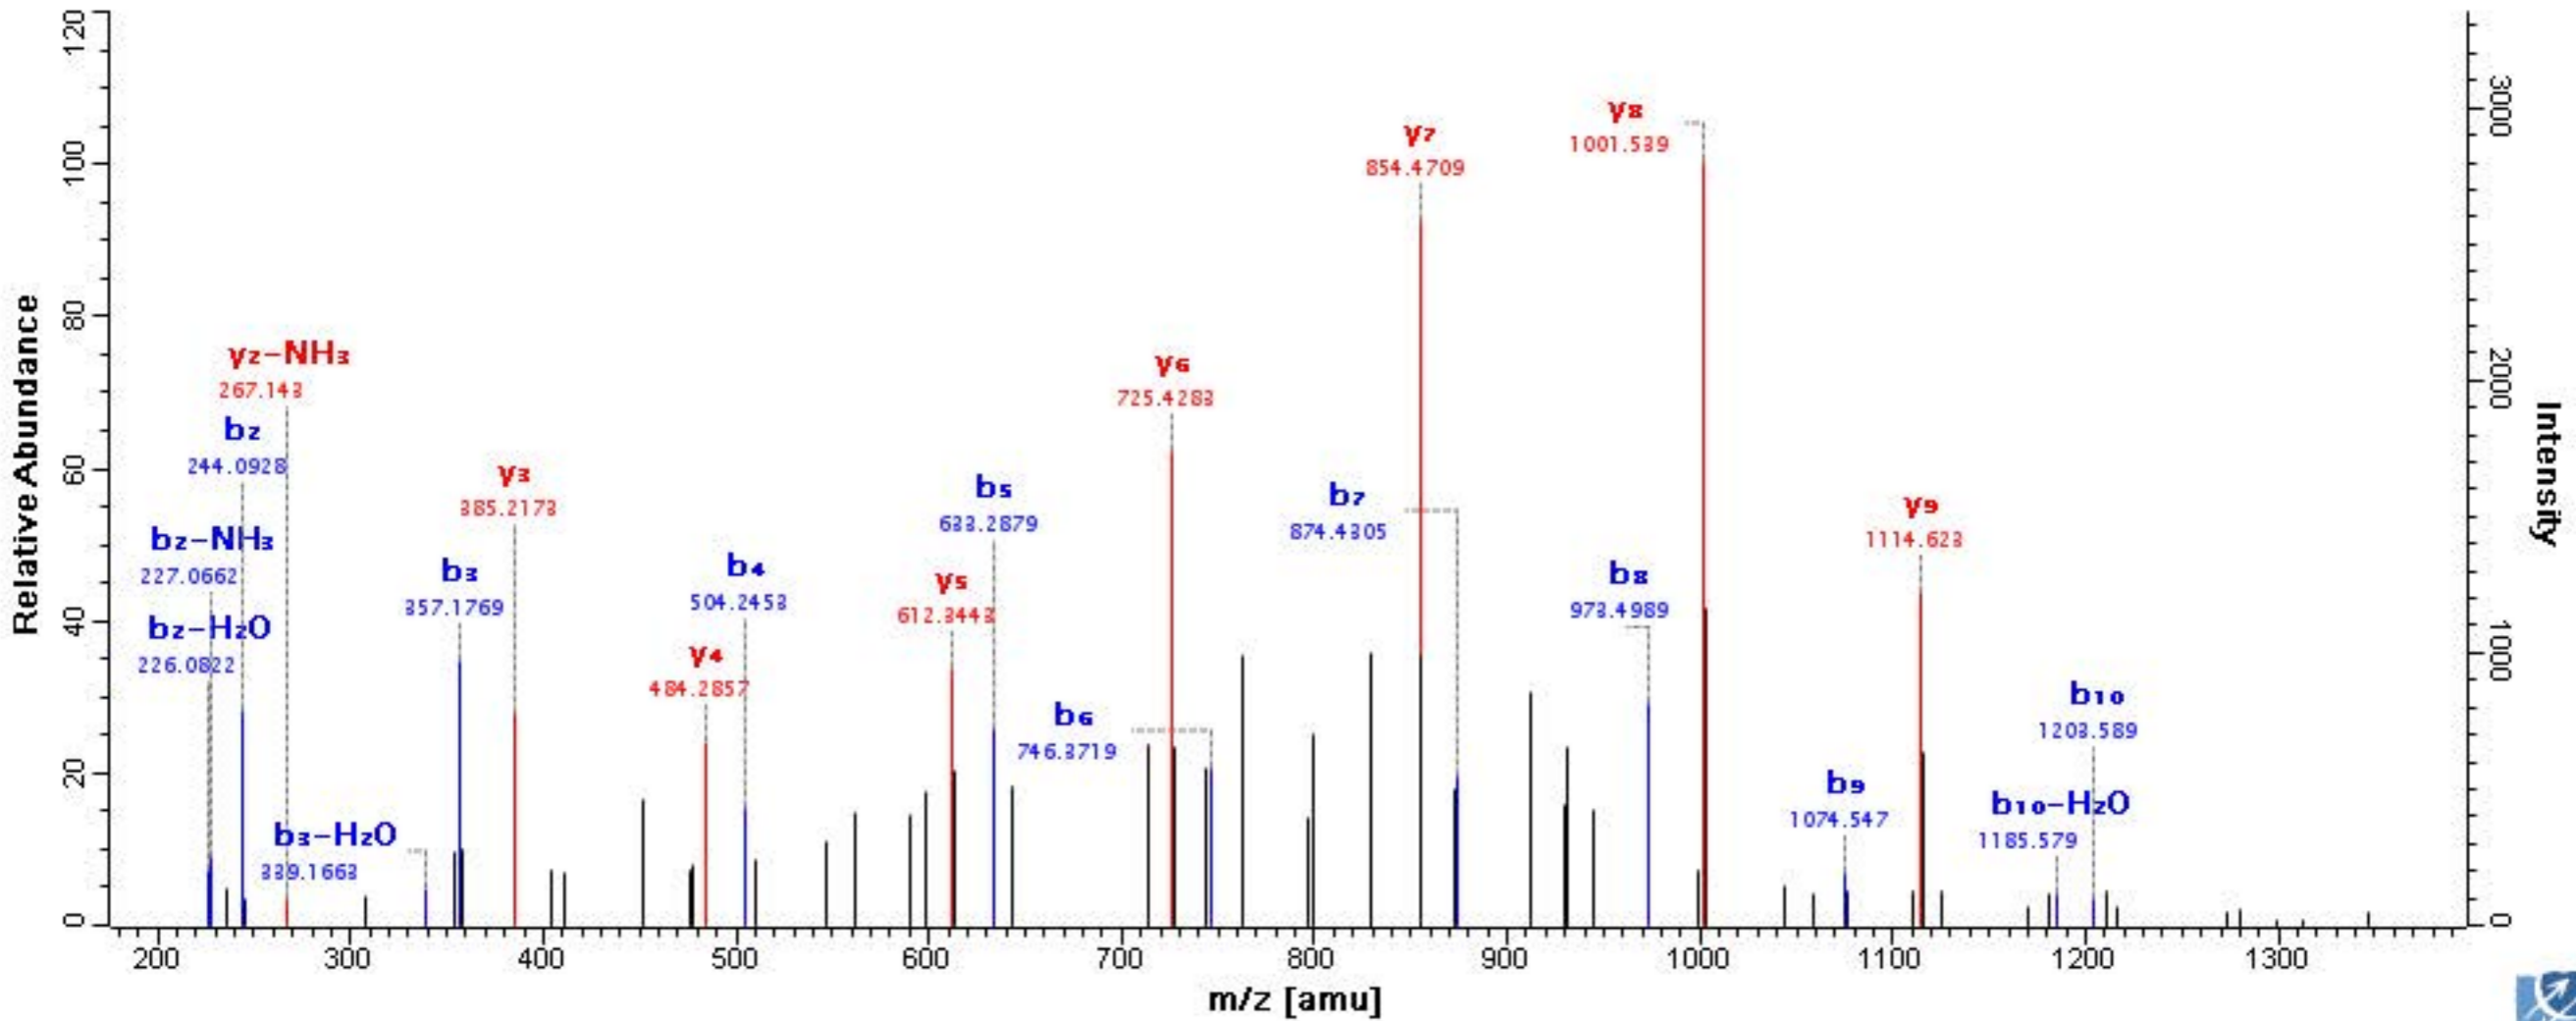

**precursor information**

|                   |                     |
|-------------------|---------------------|
| Mass:             | 1348.68701          |
| m/z:              | System.Collections. |
| Charge:           | System.Collections. |
| Retentiontime:    | System.Collections. |
| Score:            | 113.7672            |
| Mass Error [ppm]: | -0.3228             |
| PEP:              | 4.3205E-06          |
| Precursor Type:   | MULTI               |

**general information**

|                       |             |
|-----------------------|-------------|
| Annotation:           | 9 of 11     |
| AminoAcids Coverage:  | 82 %        |
| Intensity Coverage:   | 49 %        |
| Protein Localisation: | 151 ... 161 |

| b ion      |                |    |     |    |                | gamma ion  |  |
|------------|----------------|----|-----|----|----------------|------------|--|
| Δ dalton   | mass           |    | seq |    | Δ dalton       | mass       |  |
|            | 116.034219499  | 1  | D   | 10 |                |            |  |
| -0.0786674 | 244.09279701   | 2  | Q   | 9  | 1242.681978466 |            |  |
| -0.0385858 | 357.17686099   | 3  | I   | 8  | 1114.623400955 | -0.0097535 |  |
| +0.1117197 | 504.245274907  | 4  | F   | 7  | 1001.539336974 | +0.0442812 |  |
| -0.0399432 | 633.287868003  | 5  | E   | 6  | 854.470923058  | +0.0354246 |  |
| -0.0371542 | 746.371931983  | 6  | I   | 5  | 725.428329962  | +0.0565333 |  |
| +0.0119344 | 874.430509495  | 7  | Q   | 4  | 612.344265982  | -0.0285922 |  |
| +0.0155419 | 973.498923411  | 8  | V   | 3  | 484.28568847   | -0.0319043 |  |
| +0.2333053 | 1074.546601885 | 9  | T   | 2  | 385.217274554  | +0.0272018 |  |
| +0.1888812 | 1203.589194981 | 10 | E   | 1  | 284.16959608   |            |  |
|            |                | 11 | K   | 0  | 155.127002984  |            |  |

Source: 20130211\_VR\_Bsu\_TripleSILAC\_WTPPrkCPrpCReplicate3\_GeLC\_F16  
 Scannumber: 12327  
 Protein: BSU34960; yvoF  
 Peptide Score: 90.7  
 Method: ITMS; CID; 3

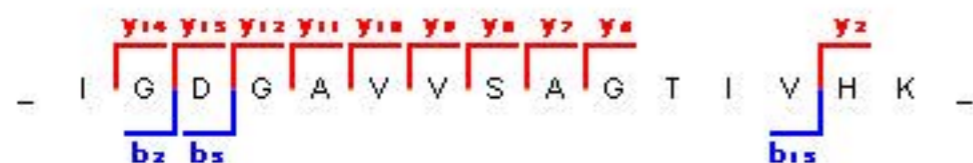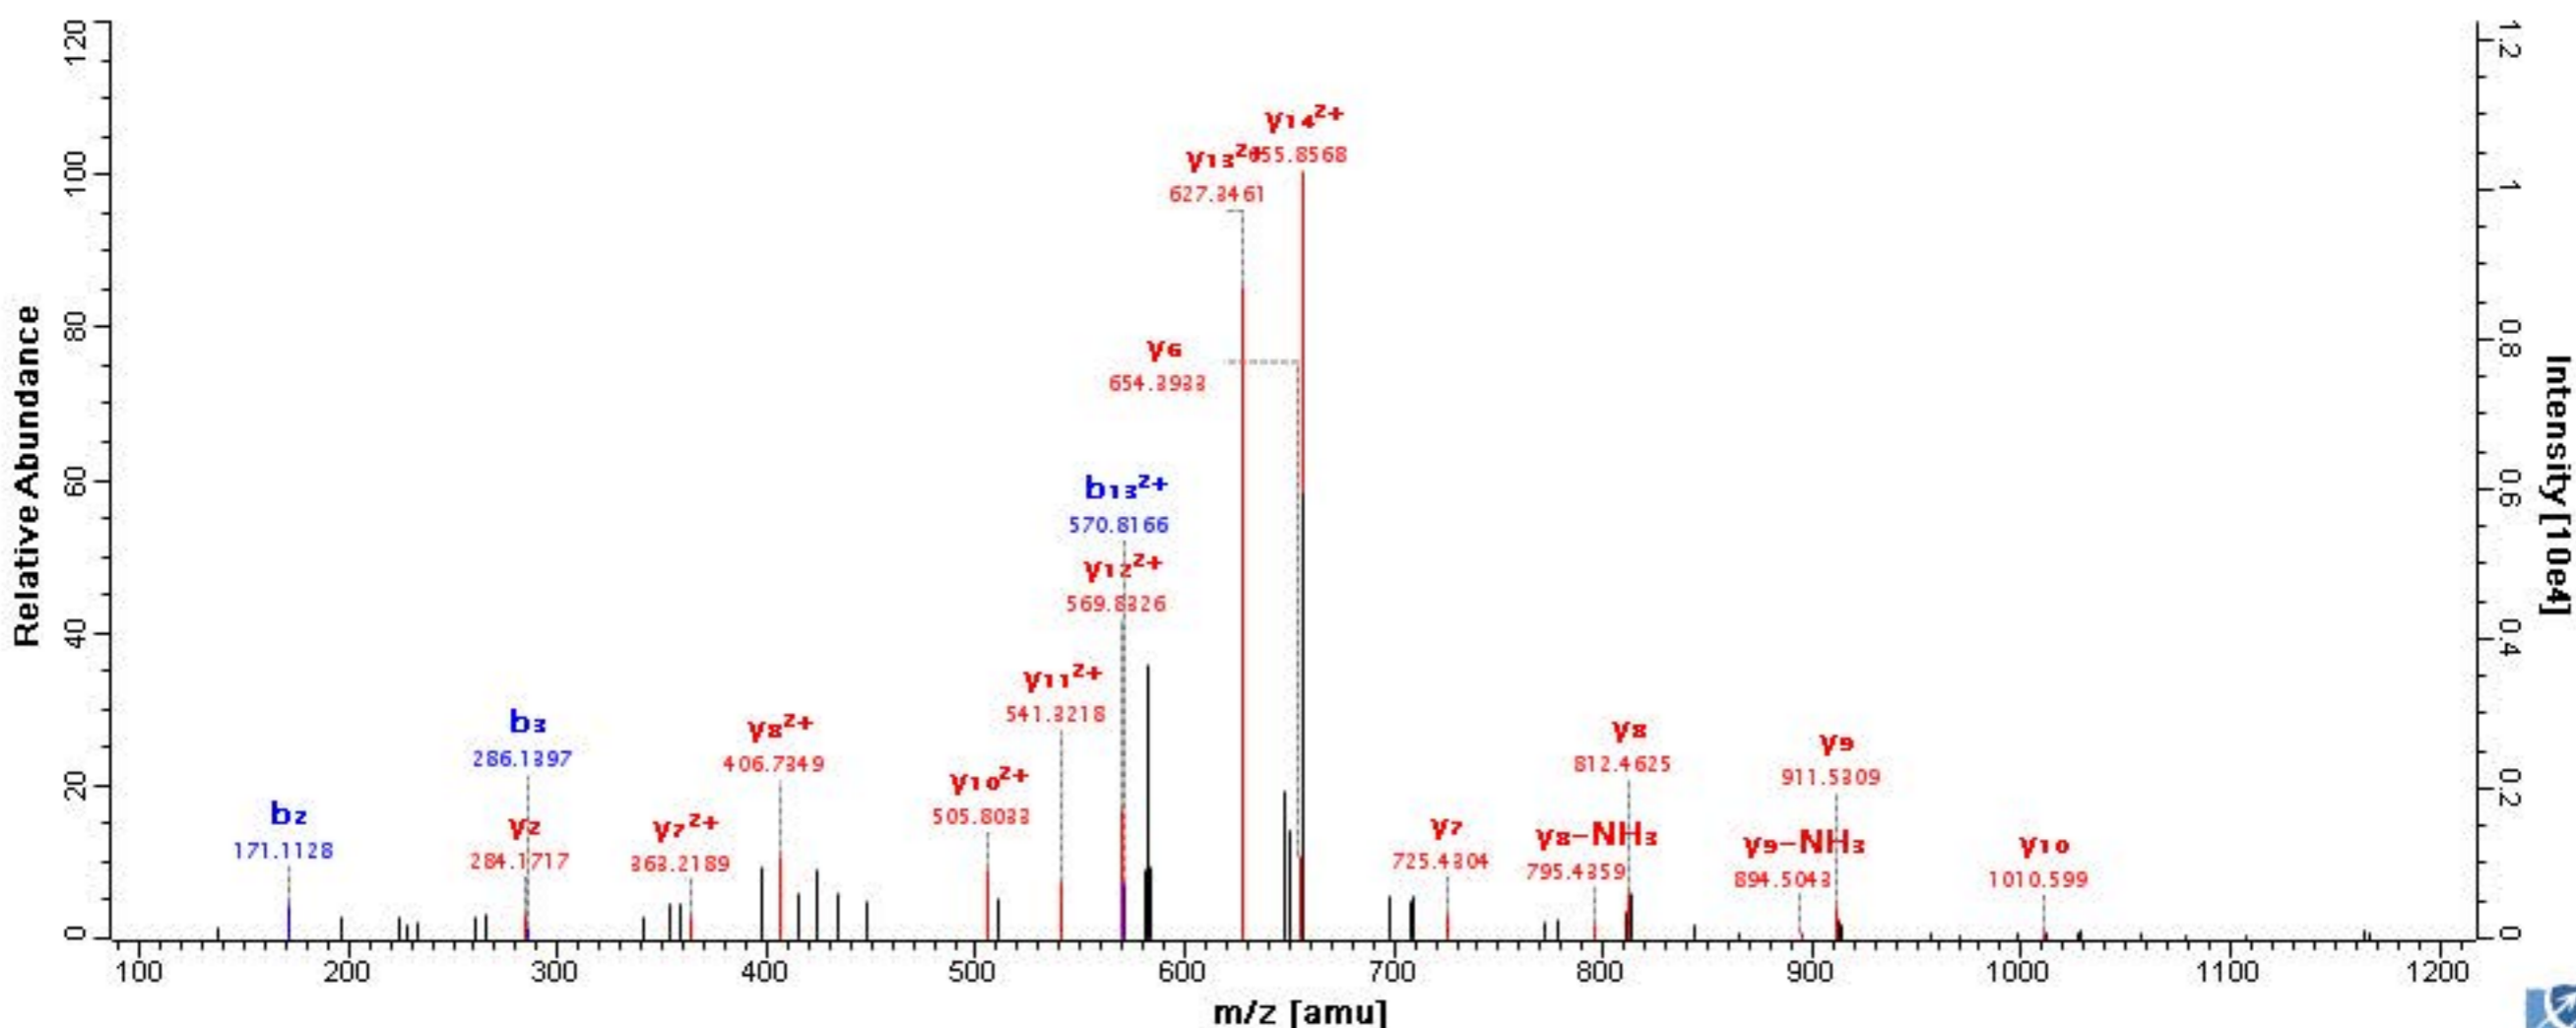

#### precursor information

|                   |                     |
|-------------------|---------------------|
| Mass:             | 1422.783            |
| m/z:              | System.Collections. |
| Charge:           | System.Collections. |
| Retentiontime:    | System.Collections. |
| Score:            | 90.69701            |
| Mass Error [ppm]: | -0.056173           |
| PEP:              | 8.367E-05           |
| Precursor Type:   | MULTI               |

#### general information

|                       |             |
|-----------------------|-------------|
| Annotation:           | 11 of 15    |
| AminoAcids Coverag    | 73 %        |
| Intensity Coverage:   | 52 %        |
| Protein Localisation: | 127 ... 141 |

| b <sup>2+</sup> ion |          | b ion    |          |     | γ ion |          | γ <sup>2+</sup> ion |           |           |           |
|---------------------|----------|----------|----------|-----|-------|----------|---------------------|-----------|-----------|-----------|
| Δ dalton            | mass     | Δ dalton | mass     | seq |       | Δ dalton | mass                | Δ dalton  | mass      |           |
|                     | 114.0913 |          | 114.0913 | 1   | I     | 14       |                     |           |           |           |
|                     | 171.1128 | +0.03841 | 171.1128 | 2   | G     | 13       | 1310.706            | 655.8568  | -0.001315 |           |
|                     | 286.1397 | +0.14013 | 286.1397 | 3   | D     | 12       | 1253.685            | 627.3461  | +0.175433 |           |
|                     | 343.1612 |          | 343.1612 | 4   | G     | 11       | 1138.658            | 569.8326  | +0.006714 |           |
|                     | 414.1983 |          | 414.1983 | 5   | A     | 10       | 1081.636            | 541.3218  | +0.075796 |           |
|                     | 513.2667 |          | 513.2667 | 6   | V     | 9        | 1010.599            | -0.016787 | 505.8033  | -0.040108 |
|                     | 612.3352 |          | 612.3352 | 7   | V     | 8        | 911.5309            | -0.005074 | 911.5309  |           |
|                     | 699.3672 |          | 699.3672 | 8   | S     | 7        | 812.4625            | +0.175461 | 406.7349  | +0.011583 |
|                     | 770.4043 |          | 770.4043 | 9   | A     | 6        | 725.4304            | +0.108674 | 363.2189  | -0.041495 |
|                     | 827.4258 |          | 827.4258 | 10  | G     | 5        | 654.3933            | +0.227513 | 654.3933  |           |
|                     | 928.4734 |          | 928.4734 | 11  | T     | 4        | 597.3719            |           | 597.3719  |           |
|                     | 1041.558 |          | 1041.558 | 12  | I     | 3        | 496.3242            |           | 496.3242  |           |
| -0.310858           | 570.8166 |          | 1140.626 | 13  | V     | 2        | 383.2401            |           | 383.2401  |           |
|                     | 1277.685 |          | 1277.685 | 14  | H     | 1        | 284.1717            | -0.012353 | 284.1717  |           |
|                     |          |          |          | 15  | K     | 0        | 147.1128            |           | 147.1128  |           |

Source: 20130211\_VR\_Bsu\_TripleSILAC\_WTPPrkCPrpCReplicate3\_GeLC\_F16  
 Scannumber: 16263  
 Protein: BSU32720; yurZ  
 Peptide Score: 126.71  
 Method: ITMS; CID; 3

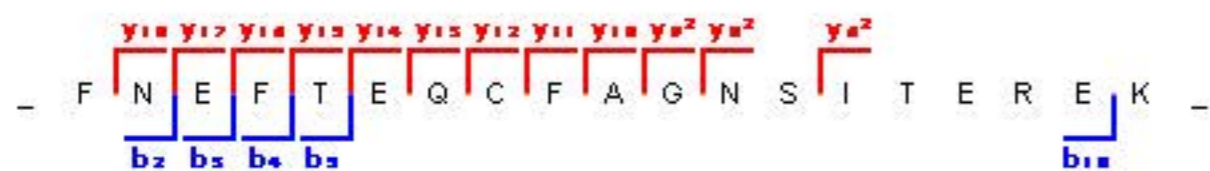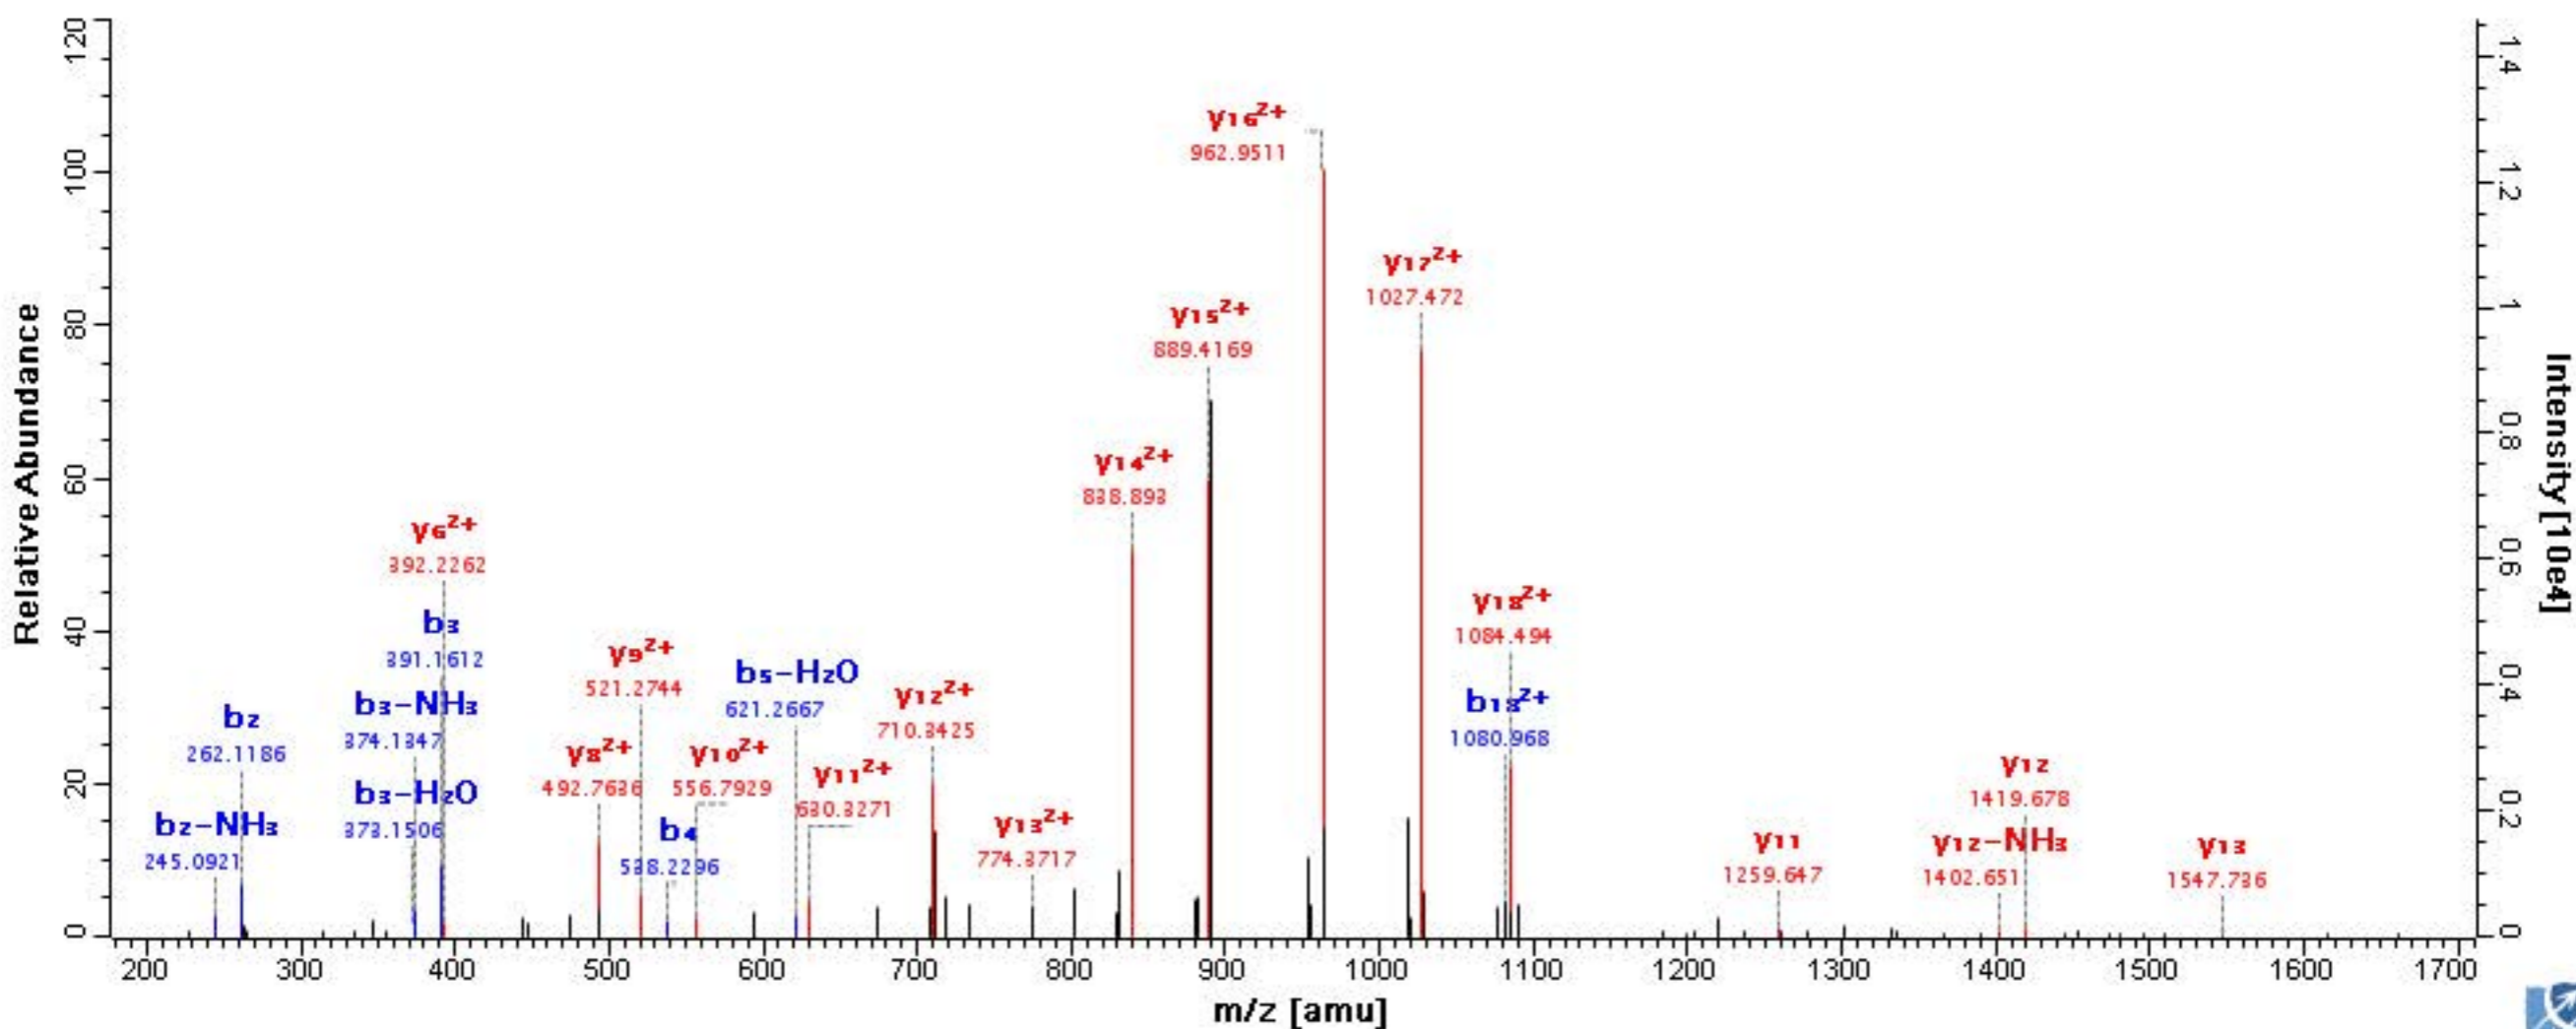

**precursor information**

|                   |                     |
|-------------------|---------------------|
| Mass:             | 2314.03875          |
| m/z:              | System.Collections. |
| Charge:           | System.Collections. |
| Retentiontime:    | System.Collections. |
| Score:            | 126.7053            |
| Mass Error [ppm]: | -1.2152             |
| PEP:              | 1.1981E-18          |
| Precursor Type:   | ISO                 |

| b <sup>2+</sup> ion |          | b ion     |          | seq |   | γ ion    |          | γ <sup>2+</sup> ion |           |           |
|---------------------|----------|-----------|----------|-----|---|----------|----------|---------------------|-----------|-----------|
| Δ dalton            | mass     | Δ dalton  | mass     |     |   | Δ dalton | mass     | Δ dalton            | mass      |           |
|                     | 148.0757 |           | 148.0757 | 1   | F | 18       |          |                     |           |           |
|                     | 262.1186 | +0.009281 | 262.1186 | 2   | N | 17       | 2167.98  | 1084.494            | +0.217943 |           |
|                     | 391.1612 | +0.094038 | 391.1612 | 3   | E | 16       | 2053.937 | 1027.472            | +0.287014 |           |
|                     | 538.2296 | +0.165517 | 538.2296 | 4   | F | 15       | 1924.895 | 962.9511            | +0.194175 |           |
|                     | 639.2773 |           | 639.2773 | 5   | T | 14       | 1777.826 | 889.4169            | -0.116894 |           |
|                     | 768.3199 |           | 768.3199 | 6   | E | 13       | 1676.779 | 838.893             | +0.264123 |           |
|                     | 896.3785 |           | 896.3785 | 7   | Q | 12       | 1547.736 | -0.107798           | 774.3717  | +0.085407 |
|                     | 1056.409 |           | 1056.409 | 8   | C | 11       | 1419.678 | +0.260472           | 710.3425  | -0.0089   |
|                     | 1203.478 |           | 1203.478 | 9   | F | 10       | 1259.647 | -0.026507           | 630.3271  | +0.16481  |
|                     | 1274.515 |           | 1274.515 | 10  | A | 9        | 1112.579 |                     | 556.7929  | +0.475323 |
|                     | 1331.536 |           | 1331.536 | 11  | G | 8        | 1041.541 |                     | 521.2744  | -0.107804 |
|                     | 1445.579 |           | 1445.579 | 12  | N | 7        | 984.52   |                     | 492.7636  | +0.298679 |
|                     | 1532.611 |           | 1532.611 | 13  | S | 6        | 870.4771 |                     | 870.4771  |           |
|                     | 1645.695 |           | 1645.695 | 14  | I | 5        | 783.445  |                     | 392.2262  | -0.027551 |
|                     | 1746.743 |           | 1746.743 | 15  | T | 4        | 670.361  |                     | 670.361   |           |
|                     | 1875.785 |           | 1875.785 | 16  | E | 3        | 569.3133 |                     | 569.3133  |           |
|                     | 2031.887 |           | 2031.887 | 17  | R | 2        | 440.2707 |                     | 440.2707  |           |
| +0.122872           | 1080.968 |           | 2160.929 | 18  | E | 1        | 284.1696 |                     | 284.1696  |           |
|                     |          |           |          | 19  | K | 0        | 155.127  |                     | 155.127   |           |

**general information**

|                       |           |
|-----------------------|-----------|
| Annotation:           | 13 of 19  |
| AminoAcids Coverag    | 68 %      |
| Intensity Coverage:   | 61 %      |
| Protein Localisation: | 38 ... 56 |

Source: 20130211\_VR\_Bsu\_TripleSILAC\_WTPPrkCPrpCReplicate3\_GeLC\_F16  
 Scannumber: 28604  
 Protein: BSU38520; dltC; ipa-3r  
 Peptide Score: 160.65  
 Method: ITMS; CID; 3

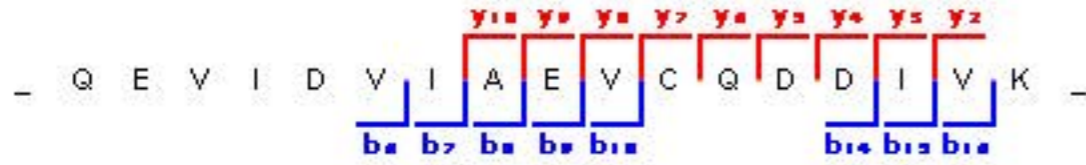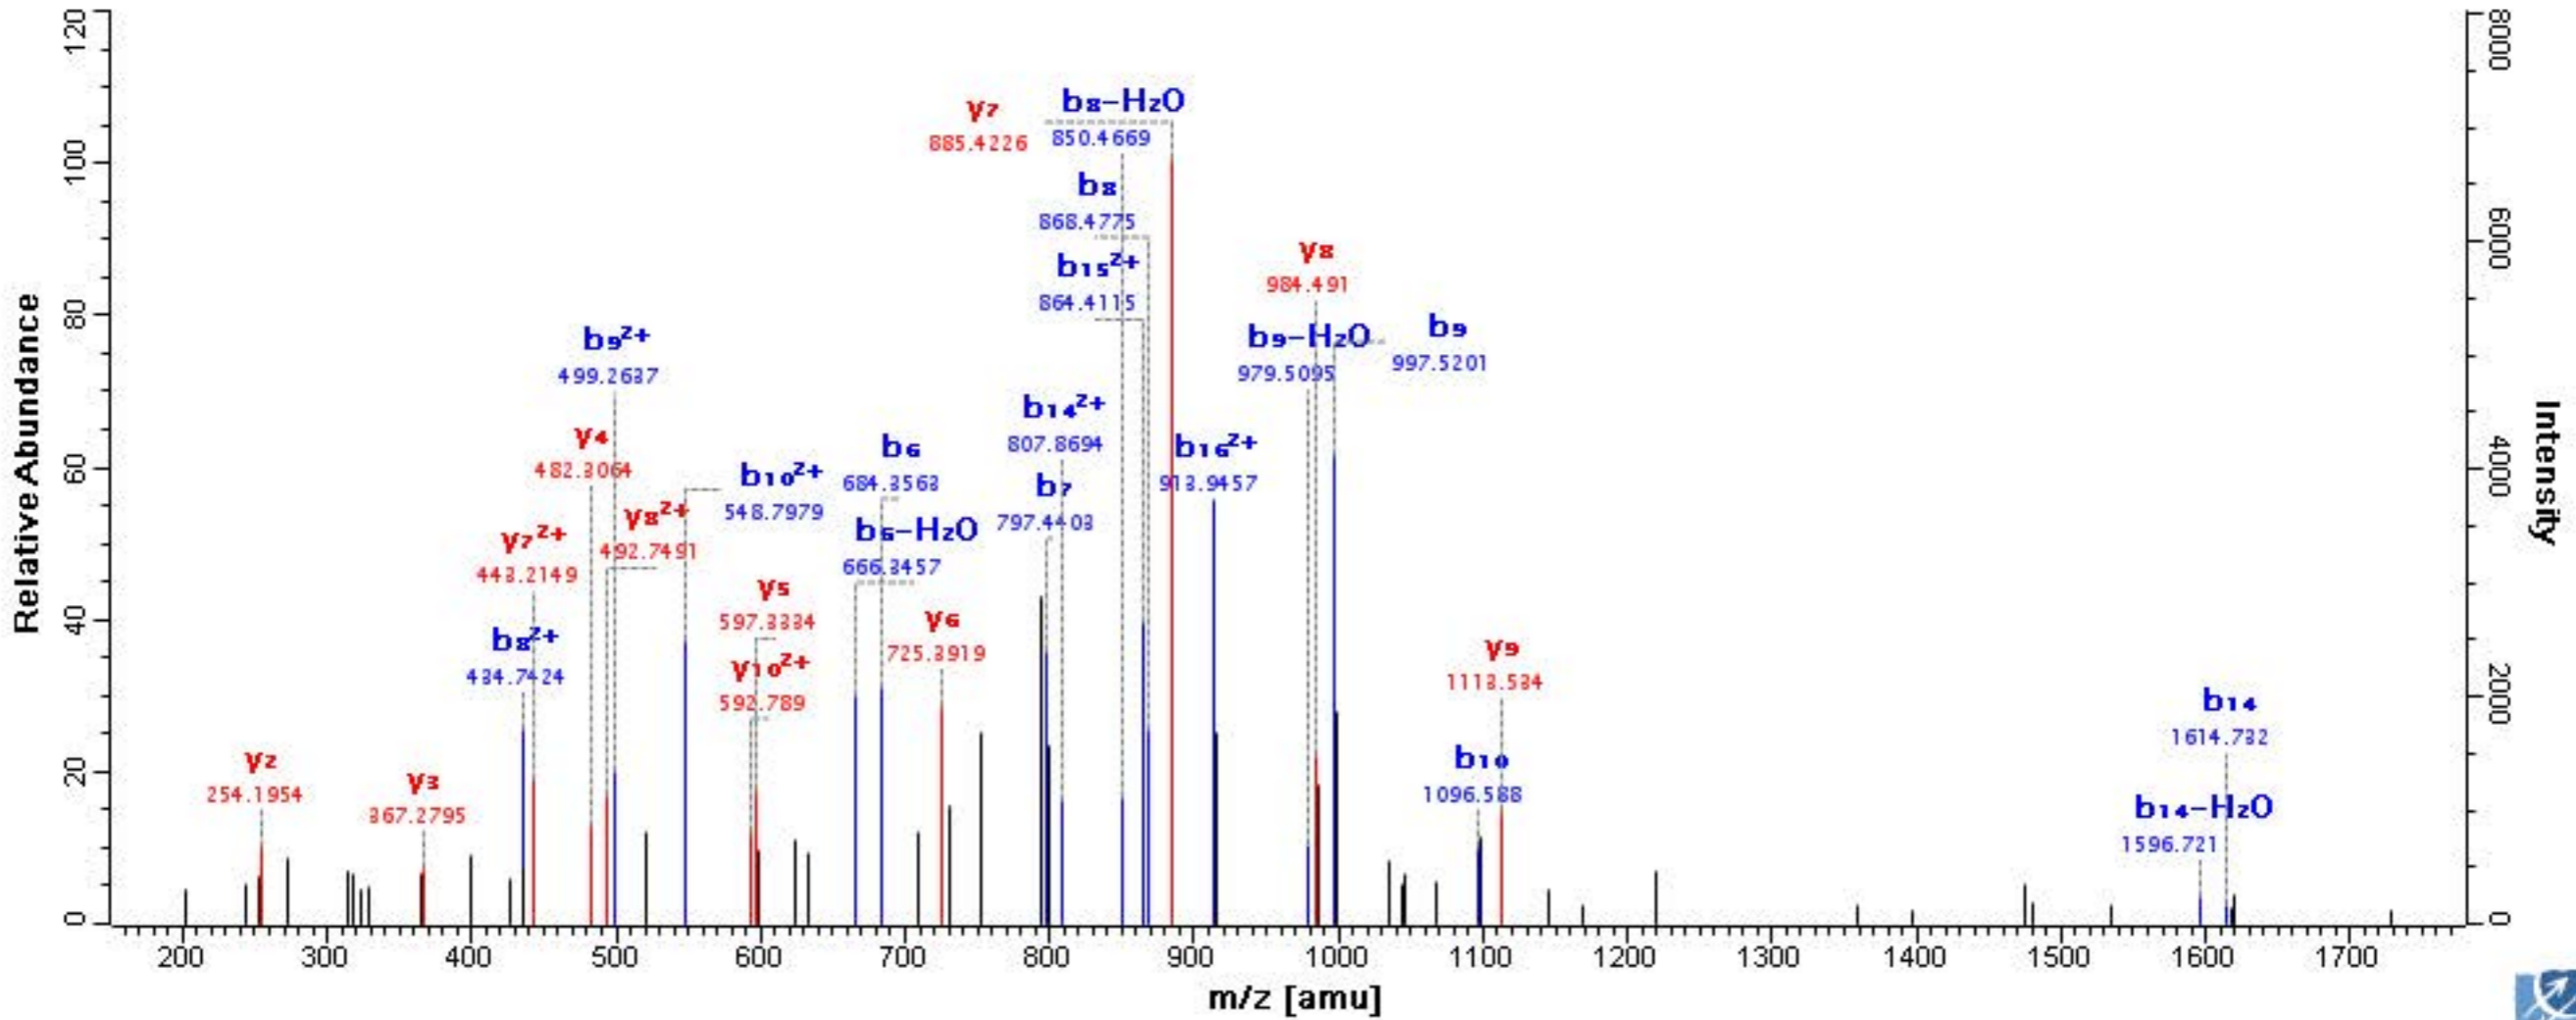

**precursor information**

|                   |                     |
|-------------------|---------------------|
| Mass:             | 1971.98214          |
| m/z:              | System.Collections. |
| Charge:           | System.Collections. |
| Retentiontime:    | System.Collections. |
| Score:            | 160.6495            |
| Mass Error [ppm]: | -0.086543           |
| PEP:              | 2.6248E-48          |
| Precursor Type:   | MULTI               |

| b <sup>2+</sup> ion |          | b ion     |          | seq |   |    | y ion    |           | y <sup>2+</sup> ion |           |
|---------------------|----------|-----------|----------|-----|---|----|----------|-----------|---------------------|-----------|
| Δ dalton            | mass     | Δ dalton  | mass     |     |   |    | Δ dalton | mass      | Δ dalton            | mass      |
|                     | 129.0659 |           | 129.0659 | 1   | Q | 16 |          |           |                     |           |
|                     | 258.1084 |           | 258.1084 | 2   | E | 15 | 1852.945 |           | 1852.945            |           |
|                     | 357.1769 |           | 357.1769 | 3   | V | 14 | 1723.903 |           | 1723.903            |           |
|                     | 470.2609 |           | 470.2609 | 4   | I | 13 | 1624.834 |           | 1624.834            |           |
|                     | 585.2879 |           | 585.2879 | 5   | D | 12 | 1511.75  |           | 1511.75             |           |
|                     | 684.3563 | +0.074199 | 684.3563 | 6   | V | 11 | 1396.723 |           | 1396.723            |           |
|                     | 797.4403 | -0.050453 | 797.4403 | 7   | I | 10 | 1297.655 |           | 1297.655            |           |
| +0.361819           | 434.7424 | -0.046857 | 868.4775 | 8   | A | 9  | 1184.571 |           | 592.789             | +0.058844 |
| -0.094109           | 499.2637 | +0.110074 | 997.5201 | 9   | E | 8  | 1113.534 | -0.027618 | 1113.534            |           |
| -0.084676           | 548.7979 | +0.218662 | 1096.588 | 10  | V | 7  | 984.491  | +0.075278 | 492.7491            | +0.326237 |
|                     | 1256.619 |           | 1256.619 | 11  | C | 6  | 885.4226 | -0.048386 | 443.2149            | +0.201997 |
|                     | 1384.678 |           | 1384.678 | 12  | Q | 5  | 725.3919 | +0.151513 | 725.3919            |           |
|                     | 1499.705 |           | 1499.705 | 13  | D | 4  | 597.3334 | -0.144768 | 597.3334            |           |
| +0.14632            | 807.8694 | -0.004039 | 1614.732 | 14  | D | 3  | 482.3064 | +0.122165 | 482.3064            |           |
| +0.09086            | 864.4115 |           | 1727.816 | 15  | I | 2  | 367.2795 | -0.138246 | 367.2795            |           |
| +0.052197           | 913.9457 |           | 1826.884 | 16  | V | 1  | 254.1954 | +0.13283  | 254.1954            |           |
|                     |          |           |          | 17  | K | 0  | 155.127  |           | 155.127             |           |

**general information**

|                       |          |
|-----------------------|----------|
| Annotation:           | 11 of 17 |
| AminoAcids Coverag    | 65 %     |
| Intensity Coverage:   | 63 %     |
| Protein Localisation: | 5 ... 21 |
